# Supplementary material for: Molecular Dynamics Study of the Interaction of Carbon Nanotubes with Telomeric DNA Fragment Containing Noncanonical G-Quadruplex and i-Motif Forms
Source: MDPI journal article supplement (doi:10.3390/ijms21061925), 2020-03-11
Supplement: s1 [file s1]

# Molecular Dynamics Study of the Interaction of Carbon Nanotubes with Telomeric DNA Fragment Containing Noncanonical G-quadruplex and i-Motif Forms

**Tomasz Panczyk\*, Patrycja Wojton, Pawel Wolski**

Institute of Catalysis and Surface Chemistry, Polish Academy of Sciences  
ul. Niezapominajek 8, 30239 Cracow, Poland

These files can be used to analyze the associated configurations in a more detailed way. They can be directly visualized using vmd (<https://www.ks.uiuc.edu/Research/vmd/>), pymol (<https://pymol.org/2/>) or many other molecular visualization tools.

- Pdb files associated with the results shown in Figure 1:

Fig1\_A.pdb – initial structure of the system

Fig1\_B.pdb – final structure of the system after 40ns of equilibration

- Pdb files associated with the results shown in Figure 3:

Fig3\_A.pdb – structure of a10 system after first REM run

Fig3\_B.pdb – structure of a10 system after second REM run

Fig3\_C.pdb – structure of a10 system after third REM run

- Pdb files associated with the results shown in Figure 4:

Fig4\_a10.pdb – the optimal configuration obtained for the system a10

Fig4\_a20.pdb – the optimal configuration obtained for the system a20

Fig4\_n10.pdb – the optimal configuration obtained for the system n10

Fig4\_n20.pdb – the optimal configuration obtained for the system n20

- Pdb files associated with the results shown in Figure 7, i.e. for systems obtained after removal of guanine residues from CNT:

Fig7\_a10.pdb – configuration obtained for a10 system

Fig7\_a20.pdb – configuration obtained for a20 system

Fig7\_n10.pdb – configuration obtained for n10 system

Fig7\_n20.pdb – configuration obtained for n20 system
