# Supplementary material for: Molecular Dynamics Study of the Interaction of Carbon Nanotubes with Telomeric DNA Fragment Containing Noncanonical G-Quadruplex and i-Motif Forms
Source: Int J Mol Sci. 2020 Mar 11;21(6):1925. doi: 10.3390/ijms21061925 (PMC7139311; doi:10.3390/ijms21061925)
Supplement: Supplementary file 1 [file ijms-21-01925-s001.zip]

Archive with 15 entries (15 files):
- fig1_A.pdb
- fig1_B.pdb
- fig3_A.pdb
- fig3_B.pdb
- fig3_C.pdb
- fig4_a10.pdb
- fig4_a20.pdb
- fig4_n10.pdb
- fig4_n20.pdb
- fig7_a10.pdb
- fig7_a20.pdb
- fig7_n10.pdb
- fig7_n20.pdb
- info.doc
- info.pdf
