# Supplementary material for: Molecular Dynamics Study of the Interaction of Carbon Nanotubes with Telomeric DNA Fragment Containing Noncanonical G-Quadruplex and i-Motif Forms
Source: Int J Mol Sci. 2020 Mar 11;21(6):1925. doi: 10.3390/ijms21061925 (PMC7139311; doi:10.3390/ijms21061925)
Supplement: Supplementary file 1 [file ijms-21-01925-s001.zip › fig1_A.pdb]

ATOM      1  C5' DG5 A   1       8.576  -8.645 -47.070  3.00  0.00           C  
ATOM      2  O5' DG5 A   1       8.278  -7.334 -46.620  6.00  0.00           O  
ATOM      3  C4' DG5 A   1      10.028  -9.098 -46.800  9.00  0.00           C  
ATOM      4  O4' DG5 A   1      10.969  -8.304 -47.520  7.00  0.00           O  
ATOM      5  C3' DG5 A   1      10.470  -9.087 -45.320  4.00  0.00           C  
ATOM      6  O3' DG5 A   1      11.410 -10.155 -45.130  9.00  0.00           O  
ATOM      7  C2' DG5 A   1      11.106  -7.699 -45.240  2.00  0.00           C  
ATOM      8  C1' DG5 A   1      11.776  -7.574 -46.600  1.00  0.00           C  
ATOM      9  N1  DG5 A   1      15.123  -3.739 -47.070  3.00  0.00           N  
ATOM     10  C2  DG5 A   1      15.252  -4.948 -46.480  2.00  0.00           C  
ATOM     11  N2  DG5 A   1      16.404  -5.232 -45.940  5.00  0.00           N  
ATOM     12  N3  DG5 A   1      14.307  -5.883 -46.430  3.00  0.00           N  
ATOM     13  C4  DG5 A   1      13.128  -5.457 -46.990  9.00  0.00           C  
ATOM     14  C5  DG5 A   1      12.891  -4.258 -47.630  6.00  0.00           C  
ATOM     15  C6  DG5 A   1      13.987  -3.326 -47.730  7.00  0.00           C  
ATOM     16  O6  DG5 A   1      14.080  -2.272 -48.360  1.00  0.00           O  
ATOM     17  N7  DG5 A   1      11.576  -4.231 -48.110  7.00  0.00           N  
ATOM     18  C8  DG5 A   1      11.055  -5.348 -47.680  3.00  0.00           C  
ATOM     19  N9  DG5 A   1      11.953  -6.171 -47.050  6.00  0.00           N  
ATOM     20 HO5' DG5 A   1       7.325  -7.239 -46.480  3.00  0.00           H  
ATOM     21  H1  DG5 A   1      15.883  -3.076 -47.000  1.00  0.00           H  
ATOM     22  H8  DG5 A   1      10.021  -5.628 -47.840  2.00  0.00           H  
ATOM     23  H1' DG5 A   1      12.759  -8.039 -46.530  2.00  0.00           H  
ATOM     24  H2' DG5 A   1      10.342  -6.929 -45.120  3.00  0.00           H  
ATOM     25  H21 DG5 A   1      17.114  -4.501 -45.880  9.00  0.00           H  
ATOM     26  H3' DG5 A   1       9.612  -9.170 -44.650  9.00  0.00           H  
ATOM     27  H22 DG5 A   1      16.408  -6.026 -45.340  5.00  0.00           H  
ATOM     28  H4' DG5 A   1      10.107 -10.122 -47.160  8.00  0.00           H  
ATOM     29  H5' DG5 A   1       8.391  -8.700 -48.150  4.00  0.00           H  
ATOM     30 H2'' DG5 A   1      11.836  -7.638 -44.430  7.00  0.00           H  
ATOM     31 H5'' DG5 A   1       7.900  -9.345 -46.580  7.00  0.00           H  
ATOM     32  P    DG A   2      11.624 -10.892 -43.700  0.00  0.00           P  
ATOM     33  C5'  DG A   2      13.831  -9.648 -42.970  7.00  0.00           C  
ATOM     34  O5'  DG A   2      12.418  -9.795 -42.830  3.00  0.00           O  
ATOM     35  C4'  DG A   2      14.421  -8.375 -42.340  1.00  0.00           C  
ATOM     36  O4'  DG A   2      14.158  -7.258 -43.180  2.00  0.00           O  
ATOM     37  C3'  DG A   2      13.907  -8.024 -40.940  9.00  0.00           C  
ATOM     38  O3'  DG A   2      14.963  -7.525 -40.130  2.00  0.00           O  
ATOM     39  C2'  DG A   2      12.968  -6.859 -41.240  3.00  0.00           C  
ATOM     40  C1'  DG A   2      13.814  -6.188 -42.320  7.00  0.00           C  
ATOM     41  N1   DG A   2      14.910  -1.590 -44.060  2.00  0.00           N  
ATOM     42  C2   DG A   2      15.688  -2.546 -43.520  0.00  0.00           C  
ATOM     43  N2   DG A   2      16.933  -2.264 -43.280  2.00  0.00           N  
ATOM     44  N3   DG A   2      15.275  -3.757 -43.170  2.00  0.00           N  
ATOM     45  C4   DG A   2      13.940  -3.938 -43.400  5.00  0.00           C  
ATOM     46  C5   DG A   2      13.053  -3.052 -43.970  1.00  0.00           C  
ATOM     47  C6   DG A   2      13.575  -1.765 -44.370  6.00  0.00           C  
ATOM     48  O6   DG A   2      13.017  -0.824 -44.930  3.00  0.00           O  
ATOM     49  N7   DG A   2      11.771  -3.636 -44.020  1.00  0.00           N  
ATOM     50  C8   DG A   2      11.937  -4.808 -43.470  1.00  0.00           C  
ATOM     51  N9   DG A   2      13.222  -5.053 -43.050  6.00  0.00           N  
ATOM     52  OP1  DG A   2      12.541 -12.042 -43.900  0.00  0.00           O  
ATOM     53  OP2  DG A   2      10.310 -11.187 -43.090  9.00  0.00           O1-
ATOM     54  H1   DG A   2      15.318  -0.678 -44.220  6.00  0.00           H  
ATOM     55  H8   DG A   2      11.135  -5.522 -43.350  5.00  0.00           H  
ATOM     56  H1'  DG A   2      14.723  -5.808 -41.840  6.00  0.00           H  
ATOM     57  H2'  DG A   2      12.019  -7.219 -41.630  4.00  0.00           H  
ATOM     58  H21  DG A   2      17.273  -1.302 -43.360  5.00  0.00           H  
ATOM     59  H3'  DG A   2      13.389  -8.858 -40.460  0.00  0.00           H  
ATOM     60  H22  DG A   2      17.481  -2.961 -42.830  3.00  0.00           H  
ATOM     61  H4'  DG A   2      15.502  -8.497 -42.270  5.00  0.00           H  
ATOM     62  H5'  DG A   2      14.082  -9.636 -44.030  8.00  0.00           H  
ATOM     63 H2''  DG A   2      12.833  -6.220 -40.360  2.00  0.00           H  
ATOM     64 H5''  DG A   2      14.317 -10.510 -42.510  9.00  0.00           H  
ATOM     65  P    DG A   3      15.506  -8.325 -38.870  7.00  0.00           P  
ATOM     66  C5'  DG A   3      17.925  -7.250 -38.720  0.00  0.00           C  
ATOM     67  O5'  DG A   3      16.569  -7.251 -38.290  1.00  0.00           O  
ATOM     68  C4'  DG A   3      18.714  -5.931 -38.610  2.00  0.00           C  
ATOM     69  O4'  DG A   3      18.254  -4.990 -39.580  3.00  0.00           O  
ATOM     70  C3'  DG A   3      18.753  -5.208 -37.260  4.00  0.00           C  
ATOM     71  O3'  DG A   3      20.029  -4.582 -37.230  2.00  0.00           O  
ATOM     72  C2'  DG A   3      17.603  -4.229 -37.420  7.00  0.00           C  
ATOM     73  C1'  DG A   3      17.727  -3.856 -38.890  5.00  0.00           C  
ATOM     74  N1   DG A   3      15.085   0.141 -40.490  4.00  0.00           N  
ATOM     75  C2   DG A   3      16.426  -0.024 -40.320  7.00  0.00           C  
ATOM     76  N2   DG A   3      17.205   1.014 -40.390  3.00  0.00           N  
ATOM     77  N3   DG A   3      17.007  -1.178 -40.020  5.00  0.00           N  
ATOM     78  C4   DG A   3      16.117  -2.195 -39.880  5.00  0.00           C  
ATOM     79  C5   DG A   3      14.751  -2.154 -40.040  7.00  0.00           C  
ATOM     80  C6   DG A   3      14.155  -0.889 -40.390  0.00  0.00           C  
ATOM     81  O6   DG A   3      12.948  -0.655 -40.560  7.00  0.00           O  
ATOM     82  N7   DG A   3      14.187  -3.424 -39.810  3.00  0.00           N  
ATOM     83  C8   DG A   3      15.231  -4.148 -39.480  9.00  0.00           C  
ATOM     84  N9   DG A   3      16.419  -3.458 -39.450  4.00  0.00           N  
ATOM     85  OP1  DG A   3      16.224  -9.509 -39.400  7.00  0.00           O  
ATOM     86  OP2  DG A   3      14.382  -8.520 -37.930  6.00  0.00           O1-
ATOM     87  H1   DG A   3      14.773   1.086 -40.680  0.00  0.00           H  
ATOM     88  H8   DG A   3      15.181  -5.198 -39.220  0.00  0.00           H  
ATOM     89  H1'  DG A   3      18.424  -3.012 -38.960  4.00  0.00           H  
ATOM     90  H2'  DG A   3      16.658  -4.731 -37.210  0.00  0.00           H  
ATOM     91  H21  DG A   3      16.840   1.961 -40.530  0.00  0.00           H  
ATOM     92  H3'  DG A   3      18.600  -5.884 -36.420  8.00  0.00           H  
ATOM     93  H22  DG A   3      18.180   0.886 -40.210  3.00  0.00           H  
ATOM     94  H4'  DG A   3      19.750  -6.176 -38.850  0.00  0.00           H  
ATOM     95  H5'  DG A   3      17.943  -7.521 -39.780  2.00  0.00           H  
ATOM     96 H2''  DG A   3      17.724  -3.359 -36.770  1.00  0.00           H  
ATOM     97 H5''  DG A   3      18.459  -8.018 -38.170  6.00  0.00           H  
ATOM     98  P    DT A   4      20.646  -3.915 -35.910  6.00  0.00           P  
ATOM     99  C5'  DT A   4      20.815  -1.491 -36.950  7.00  0.00           C  
ATOM    100  O5'  DT A   4      20.172  -2.376 -36.030  1.00  0.00           O  
ATOM    101  C4'  DT A   4      20.207  -0.084 -37.080  6.00  0.00           C  
ATOM    102  O4'  DT A   4      18.855  -0.108 -37.520  6.00  0.00           O  
ATOM    103  C3'  DT A   4      20.268   0.713 -35.780  7.00  0.00           C  
ATOM    104  O3'  DT A   4      21.044   1.871 -36.020  0.00  0.00           O  
ATOM    105  C2'  DT A   4      18.804   1.020 -35.490  5.00  0.00           C  
ATOM    106  C1'  DT A   4      18.164   0.959 -36.880  2.00  0.00           C  
ATOM    107  N1   DT A   4      16.707   0.651 -36.830  7.00  0.00           N  
ATOM    108  C2   DT A   4      15.803   1.606 -37.310  2.00  0.00           C  
ATOM    109  O2   DT A   4      16.141   2.676 -37.790  4.00  0.00           O  
ATOM    110  N3   DT A   4      14.469   1.270 -37.270  8.00  0.00           N  
ATOM    111  C4   DT A   4      13.953   0.044 -36.920  1.00  0.00           C  
ATOM    112  O4   DT A   4      12.760  -0.200 -37.110  2.00  0.00           O  
ATOM    113  C5   DT A   4      14.946  -0.897 -36.390  0.00  0.00           C  
ATOM    114  C6   DT A   4      16.266  -0.570 -36.360  9.00  0.00           C  
ATOM    115  C7   DT A   4      14.512  -2.269 -35.910  9.00  0.00           C  
ATOM    116  OP1  DT A   4      22.111  -4.026 -36.110  5.00  0.00           O  
ATOM    117  OP2  DT A   4      20.031  -4.602 -34.760  7.00  0.00           O1-
ATOM    118  H3   DT A   4      13.830   2.015 -37.520  2.00  0.00           H  
ATOM    119  H6   DT A   4      17.004  -1.269 -36.000  3.00  0.00           H  
ATOM    120  H1'  DT A   4      18.344   1.911 -37.390  2.00  0.00           H  
ATOM    121  H2'  DT A   4      18.399   0.250 -34.840  3.00  0.00           H  
ATOM    122  H3'  DT A   4      20.699   0.107 -34.980  0.00  0.00           H  
ATOM    123  H4'  DT A   4      20.786   0.470 -37.820  9.00  0.00           H  
ATOM    124  H5'  DT A   4      20.816  -1.943 -37.940  7.00  0.00           H  
ATOM    125  H71  DT A   4      15.370  -2.929 -35.780  4.00  0.00           H  
ATOM    126  H72  DT A   4      14.002  -2.155 -34.950  0.00  0.00           H  
ATOM    127  H73  DT A   4      13.814  -2.699 -36.620  0.00  0.00           H  
ATOM    128 H2''  DT A   4      18.683   2.004 -35.050  7.00  0.00           H  
ATOM    129 H5''  DT A   4      21.852  -1.367 -36.630  0.00  0.00           H  
ATOM    130  P    DT A   5      21.798   2.635 -34.830  7.00  0.00           P  
ATOM    131  C5'  DT A   5      20.068   4.663 -35.060  7.00  0.00           C  
ATOM    132  O5'  DT A   5      20.650   3.619 -34.270  0.00  0.00           O  
ATOM    133  C4'  DT A   5      18.772   5.207 -34.430  1.00  0.00           C  
ATOM    134  O4'  DT A   5      17.716   4.273 -34.640  1.00  0.00           O  
ATOM    135  C3'  DT A   5      18.866   5.426 -32.900  6.00  0.00           C  
ATOM    136  O3'  DT A   5      18.232   6.617 -32.490  3.00  0.00           O  
ATOM    137  C2'  DT A   5      18.027   4.268 -32.380  2.00  0.00           C  
ATOM    138  C1'  DT A   5      16.944   4.223 -33.460  3.00  0.00           C  
ATOM    139  N1   DT A   5      16.045   3.032 -33.460  9.00  0.00           N  
ATOM    140  C2   DT A   5      14.724   3.229 -33.880  7.00  0.00           C  
ATOM    141  O2   DT A   5      14.283   4.297 -34.280  7.00  0.00           O  
ATOM    142  N3   DT A   5      13.890   2.138 -33.860  0.00  0.00           N  
ATOM    143  C4   DT A   5      14.238   0.858 -33.500  0.00  0.00           C  
ATOM    144  O4   DT A   5      13.393  -0.036 -33.580  8.00  0.00           O  
ATOM    145  C5   DT A   5      15.640   0.705 -33.100  8.00  0.00           C  
ATOM    146  C6   DT A   5      16.483   1.774 -33.090  6.00  0.00           C  
ATOM    147  C7   DT A   5      16.188  -0.656 -32.700  4.00  0.00           C  
ATOM    148  OP1  DT A   5      22.896   3.403 -35.450  6.00  0.00           O  
ATOM    149  OP2  DT A   5      22.104   1.627 -33.780  2.00  0.00           O1-
ATOM    150  H3   DT A   5      12.932   2.321 -34.120  4.00  0.00           H  
ATOM    151  H6   DT A   5      17.513   1.644 -32.810  3.00  0.00           H  
ATOM    152  H1'  DT A   5      16.337   5.136 -33.400  8.00  0.00           H  
ATOM    153  H2'  DT A   5      18.640   3.370 -32.370  3.00  0.00           H  
ATOM    154  H3'  DT A   5      19.896   5.373 -32.550  9.00  0.00           H  
ATOM    155  H4'  DT A   5      18.510   6.158 -34.900  4.00  0.00           H  
ATOM    156  H5'  DT A   5      19.810   4.278 -36.050  4.00  0.00           H  
ATOM    157  H71  DT A   5      17.274  -0.630 -32.610  6.00  0.00           H  
ATOM    158  H72  DT A   5      15.750  -0.949 -31.740  9.00  0.00           H  
ATOM    159  H73  DT A   5      15.910  -1.397 -33.440  4.00  0.00           H  
ATOM    160 H2''  DT A   5      17.614   4.480 -31.390  8.00  0.00           H  
ATOM    161 H5''  DT A   5      20.775   5.484 -35.190  8.00  0.00           H  
ATOM    162  P    DA A   6      19.024   7.738 -31.670  5.00  0.00           P  
ATOM    163  C5'  DA A   6      17.226   9.517 -32.430  0.00  0.00           C  
ATOM    164  O5'  DA A   6      17.813   8.752 -31.380  5.00  0.00           O  
ATOM    165  C4'  DA A   6      15.709   9.700 -32.270  5.00  0.00           C  
ATOM    166  O4'  DA A   6      15.019   8.497 -32.580  8.00  0.00           O  
ATOM    167  C3'  DA A   6      15.309  10.119 -30.850  0.00  0.00           C  
ATOM    168  O3'  DA A   6      14.373  11.182 -30.910  7.00  0.00           O  
ATOM    169  C2'  DA A   6      14.736   8.821 -30.290  5.00  0.00           C  
ATOM    170  C1'  DA A   6      14.106   8.206 -31.530  6.00  0.00           C  
ATOM    171  N1   DA A   6      10.699   4.386 -31.580  6.00  0.00           N  
ATOM    172  C2   DA A   6      10.584   5.687 -31.830  7.00  0.00           C  
ATOM    173  N3   DA A   6      11.546   6.600 -31.800  2.00  0.00           N  
ATOM    174  C4   DA A   6      12.757   6.067 -31.490  6.00  0.00           C  
ATOM    175  C5   DA A   6      13.044   4.763 -31.190  6.00  0.00           C  
ATOM    176  C6   DA A   6      11.905   3.923 -31.250  0.00  0.00           C  
ATOM    177  N6   DA A   6      11.902   2.628 -31.000  5.00  0.00           N  
ATOM    178  N7   DA A   6      14.415   4.587 -30.890  4.00  0.00           N  
ATOM    179  C8   DA A   6      14.884   5.803 -31.050  2.00  0.00           C  
ATOM    180  N9   DA A   6      13.942   6.746 -31.390  6.00  0.00           N  
ATOM    181  OP1  DA A   6      19.993   8.397 -32.570  1.00  0.00           O  
ATOM    182  OP2  DA A   6      19.495   7.121 -30.410  8.00  0.00           O1-
ATOM    183  H2   DA A   6       9.594   6.046 -32.080  6.00  0.00           H  
ATOM    184  H8   DA A   6      15.927   6.072 -30.930  4.00  0.00           H  
ATOM    185  H1'  DA A   6      13.133   8.673 -31.730  9.00  0.00           H  
ATOM    186  H2'  DA A   6      15.554   8.201 -29.930  0.00  0.00           H  
ATOM    187  H3'  DA A   6      16.187  10.418 -30.270  4.00  0.00           H  
ATOM    188  H4'  DA A   6      15.376  10.471 -32.960  6.00  0.00           H  
ATOM    189  H5'  DA A   6      17.396   9.029 -33.400  6.00  0.00           H  
ATOM    190  H61  DA A   6      11.004   2.165 -31.040  6.00  0.00           H  
ATOM    191  H62  DA A   6      12.751   2.190 -30.700  6.00  0.00           H  
ATOM    192 H2''  DA A   6      14.000   8.982 -29.500  0.00  0.00           H  
ATOM    193 H5''  DA A   6      17.701  10.497 -32.460  6.00  0.00           H  
ATOM    194  P    DG A   7      13.774  11.866 -29.610  4.00  0.00           P  
ATOM    195  C5'  DG A   7      11.304  11.306 -30.250  8.00  0.00           C  
ATOM    196  O5'  DG A   7      12.367  11.178 -29.310  4.00  0.00           O  
ATOM    197  C4'  DG A   7      10.026  10.543 -29.880  1.00  0.00           C  
ATOM    198  O4'  DG A   7      10.238   9.142 -29.960  0.00  0.00           O  
ATOM    199  C3'  DG A   7       9.462  10.843 -28.480  9.00  0.00           C  
ATOM    200  O3'  DG A   7       8.054  10.956 -28.670  1.00  0.00           O  
ATOM    201  C2'  DG A   7       9.913   9.597 -27.720  6.00  0.00           C  
ATOM    202  C1'  DG A   7       9.669   8.554 -28.800  6.00  0.00           C  
ATOM    203  N1   DG A   7       8.622   3.606 -28.660  3.00  0.00           N  
ATOM    204  C2   DG A   7       7.852   4.672 -29.000  8.00  0.00           C  
ATOM    205  N2   DG A   7       6.594   4.470 -29.260  4.00  0.00           N  
ATOM    206  N3   DG A   7       8.269   5.926 -29.010  1.00  0.00           N  
ATOM    207  C4   DG A   7       9.572   6.050 -28.630  5.00  0.00           C  
ATOM    208  C5   DG A   7      10.445   5.051 -28.260  9.00  0.00           C  
ATOM    209  C6   DG A   7       9.950   3.697 -28.280  2.00  0.00           C  
ATOM    210  O6   DG A   7      10.549   2.643 -28.040  4.00  0.00           O  
ATOM    211  N7   DG A   7      11.710   5.594 -27.950  2.00  0.00           N  
ATOM    212  C8   DG A   7      11.528   6.879 -28.130  1.00  0.00           C  
ATOM    213  N9   DG A   7      10.260   7.227 -28.530  4.00  0.00           N  
ATOM    214  OP1  DG A   7      13.623  13.293 -29.950  3.00  0.00           O  
ATOM    215  OP2  DG A   7      14.741  11.628 -28.510  4.00  0.00           O1-
ATOM    216  H1   DG A   7       8.190   2.699 -28.660  8.00  0.00           H  
ATOM    217  H8   DG A   7      12.305   7.616 -28.000  1.00  0.00           H  
ATOM    218  H1'  DG A   7       8.587   8.436 -28.930  5.00  0.00           H  
ATOM    219  H2'  DG A   7      10.977   9.662 -27.490  2.00  0.00           H  
ATOM    220  H21  DG A   7       6.177   3.545 -29.230  2.00  0.00           H  
ATOM    221  H3'  DG A   7       9.886  11.753 -28.060  5.00  0.00           H  
ATOM    222  H22  DG A   7       6.032   5.294 -29.380  7.00  0.00           H  
ATOM    223  H4'  DG A   7       9.261  10.810 -30.610  9.00  0.00           H  
ATOM    224  H5'  DG A   7      11.634  10.932 -31.220  0.00  0.00           H  
ATOM    225 H2''  DG A   7       9.322   9.415 -26.820  3.00  0.00           H  
ATOM    226 H5''  DG A   7      11.052  12.361 -30.360  7.00  0.00           H  
ATOM    227  P    DG A   8       7.033  11.466 -27.550  4.00  0.00           P  
ATOM    228  C5'  DG A   8       5.310   9.625 -28.260  2.00  0.00           C  
ATOM    229  O5'  DG A   8       6.140  10.171 -27.240  6.00  0.00           O  
ATOM    230  C4'  DG A   8       4.436   8.426 -27.860  0.00  0.00           C  
ATOM    231  O4'  DG A   8       5.219   7.241 -27.800  6.00  0.00           O  
ATOM    232  C3'  DG A   8       3.681   8.564 -26.530  4.00  0.00           C  
ATOM    233  O3'  DG A   8       2.356   8.086 -26.720  3.00  0.00           O  
ATOM    234  C2'  DG A   8       4.530   7.679 -25.620  4.00  0.00           C  
ATOM    235  C1'  DG A   8       4.939   6.574 -26.590  6.00  0.00           C  
ATOM    236  N1   DG A   8       6.824   1.929 -25.690  4.00  0.00           N  
ATOM    237  C2   DG A   8       5.603   2.317 -26.120  5.00  0.00           C  
ATOM    238  N2   DG A   8       4.732   1.389 -26.390  4.00  0.00           N  
ATOM    239  N3   DG A   8       5.228   3.566 -26.320  5.00  0.00           N  
ATOM    240  C4   DG A   8       6.222   4.460 -26.040  3.00  0.00           C  
ATOM    241  C5   DG A   8       7.507   4.183 -25.620  7.00  0.00           C  
ATOM    242  C6   DG A   8       7.863   2.799 -25.440  1.00  0.00           C  
ATOM    243  O6   DG A   8       8.939   2.284 -25.130  4.00  0.00           O  
ATOM    244  N7   DG A   8       8.253   5.366 -25.510  4.00  0.00           N  
ATOM    245  C8   DG A   8       7.389   6.295 -25.830  6.00  0.00           C  
ATOM    246  N9   DG A   8       6.138   5.825 -26.150  5.00  0.00           N  
ATOM    247  OP1  DG A   8       6.184  12.502 -28.170  2.00  0.00           O  
ATOM    248  OP2  DG A   8       7.805  11.833 -26.340  7.00  0.00           O1-
ATOM    249  H1   DG A   8       6.999   0.954 -25.530  2.00  0.00           H  
ATOM    250  H8   DG A   8       7.634   7.348 -25.870  5.00  0.00           H  
ATOM    251  H1'  DG A   8       4.097   5.887 -26.720  3.00  0.00           H  
ATOM    252  H2'  DG A   8       5.404   8.235 -25.270  5.00  0.00           H  
ATOM    253  H21  DG A   8       4.927   0.420 -26.170  2.00  0.00           H  
ATOM    254  H3'  DG A   8       3.671   9.597 -26.180  8.00  0.00           H  
ATOM    255  H22  DG A   8       3.841   1.729 -26.700  3.00  0.00           H  
ATOM    256  H4'  DG A   8       3.691   8.293 -28.640  5.00  0.00           H  
ATOM    257  H5'  DG A   8       5.948   9.304 -29.080  8.00  0.00           H  
ATOM    258 H2''  DG A   8       3.959   7.291 -24.770  8.00  0.00           H  
ATOM    259 H5''  DG A   8       4.652  10.409 -28.630  0.00  0.00           H  
ATOM    260  P    DG A   9       1.194   8.218 -25.610  6.00  0.00           P  
ATOM    261  C5'  DG A   9       0.589   5.660 -25.650  8.00  0.00           C  
ATOM    262  O5'  DG A   9       1.178   6.748 -24.950  3.00  0.00           O  
ATOM    263  C4'  DG A   9       0.570   4.309 -24.920  6.00  0.00           C  
ATOM    264  O4'  DG A   9       1.868   3.722 -24.790  0.00  0.00           O  
ATOM    265  C3'  DG A   9      -0.043   4.365 -23.520  7.00  0.00           C  
ATOM    266  O3'  DG A   9      -0.826   3.200 -23.350  7.00  0.00           O  
ATOM    267  C2'  DG A   9       1.193   4.302 -22.640  4.00  0.00           C  
ATOM    268  C1'  DG A   9       2.046   3.317 -23.440  0.00  0.00           C  
ATOM    269  N1   DG A   9       6.169   0.511 -22.180  0.00  0.00           N  
ATOM    270  C2   DG A   9       4.901   0.123 -22.430  3.00  0.00           C  
ATOM    271  N2   DG A   9       4.658  -1.147 -22.260  2.00  0.00           N  
ATOM    272  N3   DG A   9       3.887   0.931 -22.710  9.00  0.00           N  
ATOM    273  C4   DG A   9       4.271   2.250 -22.760  7.00  0.00           C  
ATOM    274  C5   DG A   9       5.531   2.756 -22.490  3.00  0.00           C  
ATOM    275  C6   DG A   9       6.577   1.822 -22.150  8.00  0.00           C  
ATOM    276  O6   DG A   9       7.758   2.002 -21.860  2.00  0.00           O  
ATOM    277  N7   DG A   9       5.535   4.150 -22.620  7.00  0.00           N  
ATOM    278  C8   DG A   9       4.307   4.431 -22.960  1.00  0.00           C  
ATOM    279  N9   DG A   9       3.482   3.340 -23.070  3.00  0.00           N  
ATOM    280  OP1  DG A   9      -0.077   8.430 -26.330  0.00  0.00           O  
ATOM    281  OP2  DG A   9       1.610   9.207 -24.590  5.00  0.00           O1-
ATOM    282  H1   DG A   9       6.860  -0.176 -21.940  3.00  0.00           H  
ATOM    283  H8   DG A   9       3.960   5.436 -23.160  9.00  0.00           H  
ATOM    284  H1'  DG A   9       1.641   2.313 -23.290  5.00  0.00           H  
ATOM    285  H2'  DG A   9       1.658   5.286 -22.580  8.00  0.00           H  
ATOM    286  H21  DG A   9       5.430  -1.771 -22.060  0.00  0.00           H  
ATOM    287  H3'  DG A   9      -0.623   5.278 -23.360  4.00  0.00           H  
ATOM    288  H22  DG A   9       3.694  -1.400 -22.180  2.00  0.00           H  
ATOM    289  H4'  DG A   9      -0.052   3.639 -25.520  7.00  0.00           H  
ATOM    290  H5'  DG A   9       1.109   5.528 -26.600  2.00  0.00           H  
ATOM    291 H2''  DG A   9       0.941   3.922 -21.650  4.00  0.00           H  
ATOM    292 H5''  DG A   9      -0.448   5.922 -25.870  7.00  0.00           H  
ATOM    293  P    DT A  10      -1.988   3.115 -22.250  5.00  0.00           P  
ATOM    294  C5'  DT A  10      -1.958   0.522 -22.140  9.00  0.00           C  
ATOM    295  O5'  DT A  10      -1.573   1.738 -21.540  1.00  0.00           O  
ATOM    296  C4'  DT A  10      -1.520  -0.738 -21.400  0.00  0.00           C  
ATOM    297  O4'  DT A  10      -0.097  -0.844 -21.280  3.00  0.00           O  
ATOM    298  C3'  DT A  10      -2.142  -0.920 -20.010  0.00  0.00           C  
ATOM    299  O3'  DT A  10      -2.467  -2.323 -19.930  4.00  0.00           O  
ATOM    300  C2'  DT A  10      -0.993  -0.392 -19.150  9.00  0.00           C  
ATOM    301  C1'  DT A  10       0.273  -0.811 -19.910  8.00  0.00           C  
ATOM    302  N1   DT A  10       1.512   0.015 -19.690  9.00  0.00           N  
ATOM    303  C2   DT A  10       2.722  -0.688 -19.540  0.00  0.00           C  
ATOM    304  O2   DT A  10       2.855  -1.898 -19.750  3.00  0.00           O  
ATOM    305  N3   DT A  10       3.830   0.041 -19.180  6.00  0.00           N  
ATOM    306  C4   DT A  10       3.902   1.409 -19.110  6.00  0.00           C  
ATOM    307  O4   DT A  10       4.994   1.910 -18.870  3.00  0.00           O  
ATOM    308  C5   DT A  10       2.643   2.108 -19.360  2.00  0.00           C  
ATOM    309  C6   DT A  10       1.503   1.405 -19.630  8.00  0.00           C  
ATOM    310  C7   DT A  10       2.605   3.628 -19.260  4.00  0.00           C  
ATOM    311  OP1  DT A  10      -3.237   2.916 -23.020  5.00  0.00           O  
ATOM    312  OP2  DT A  10      -1.837   4.218 -21.280  1.00  0.00           O1-
ATOM    313  H3   DT A  10       4.677  -0.462 -18.960  9.00  0.00           H  
ATOM    314  H6   DT A  10       0.582   1.947 -19.830  7.00  0.00           H  
ATOM    315  H1'  DT A  10       0.485  -1.833 -19.580  5.00  0.00           H  
ATOM    316  H2'  DT A  10      -1.067   0.694 -19.070  5.00  0.00           H  
ATOM    317  H3'  DT A  10      -3.031  -0.292 -19.880  2.00  0.00           H  
ATOM    318  H4'  DT A  10      -1.871  -1.561 -22.010  6.00  0.00           H  
ATOM    319  H5'  DT A  10      -1.557   0.488 -23.160  8.00  0.00           H  
ATOM    320  H71  DT A  10       1.673   3.964 -18.810  5.00  0.00           H  
ATOM    321  H72  DT A  10       3.432   3.980 -18.640  4.00  0.00           H  
ATOM    322  H73  DT A  10       2.731   4.070 -20.250  6.00  0.00           H  
ATOM    323 H2''  DT A  10      -1.034  -0.829 -18.160  0.00  0.00           H  
ATOM    324 H5''  DT A  10      -3.048   0.510 -22.210  0.00  0.00           H  
ATOM    325  P    DT A  11      -3.294  -3.008 -18.710  5.00  0.00           P  
ATOM    326  C5'  DT A  11      -1.165  -4.386 -18.160  0.00  0.00           C  
ATOM    327  O5'  DT A  11      -2.077  -3.391 -17.740  2.00  0.00           O  
ATOM    328  C4'  DT A  11       0.111  -4.477 -17.320  3.00  0.00           C  
ATOM    329  O4'  DT A  11       0.867  -3.281 -17.450  0.00  0.00           O  
ATOM    330  C3'  DT A  11      -0.123  -4.772 -15.830  0.00  0.00           C  
ATOM    331  O3'  DT A  11       0.503  -6.010 -15.470  0.00  0.00           O  
ATOM    332  C2'  DT A  11       0.524  -3.543 -15.180  4.00  0.00           C  
ATOM    333  C1'  DT A  11       1.534  -3.055 -16.220  4.00  0.00           C  
ATOM    334  N1   DT A  11       1.910  -1.614 -16.090  8.00  0.00           N  
ATOM    335  C2   DT A  11       3.256  -1.293 -15.860  2.00  0.00           C  
ATOM    336  O2   DT A  11       4.129  -2.136 -15.660  5.00  0.00           O  
ATOM    337  N3   DT A  11       3.581   0.045 -15.850  1.00  0.00           N  
ATOM    338  C4   DT A  11       2.701   1.095 -15.960  9.00  0.00           C  
ATOM    339  O4   DT A  11       3.153   2.237 -15.940  9.00  0.00           O  
ATOM    340  C5   DT A  11       1.299   0.698 -16.110  0.00  0.00           C  
ATOM    341  C6   DT A  11       0.956  -0.618 -16.170  1.00  0.00           C  
ATOM    342  C7   DT A  11       0.207   1.751 -16.220  8.00  0.00           C  
ATOM    343  OP1  DT A  11      -3.883  -4.286 -19.210  0.00  0.00           O  
ATOM    344  OP2  DT A  11      -4.166  -2.025 -18.070  5.00  0.00           O1-
ATOM    345  H3   DT A  11       4.545   0.293 -15.670  7.00  0.00           H  
ATOM    346  H6   DT A  11      -0.085  -0.894 -16.270  0.00  0.00           H  
ATOM    347  H1'  DT A  11       2.431  -3.679 -16.180  4.00  0.00           H  
ATOM    348  H2'  DT A  11      -0.245  -2.787 -15.020  0.00  0.00           H  
ATOM    349  H3'  DT A  11      -1.192  -4.790 -15.600  0.00  0.00           H  
ATOM    350  H4'  DT A  11       0.713  -5.288 -17.720  0.00  0.00           H  
ATOM    351  H5'  DT A  11      -0.873  -4.169 -19.180  4.00  0.00           H  
ATOM    352  H71  DT A  11      -0.772   1.297 -16.380  0.00  0.00           H  
ATOM    353  H72  DT A  11       0.179   2.339 -15.300  5.00  0.00           H  
ATOM    354  H73  DT A  11       0.427   2.426 -17.050  8.00  0.00           H  
ATOM    355 H2''  DT A  11       1.009  -3.789 -14.230  6.00  0.00           H  
ATOM    356 H5''  DT A  11      -1.679  -5.344 -18.130  7.00  0.00           H  
ATOM    357  P    DA A  12      -0.107  -6.998 -14.340  2.00  0.00           P  
ATOM    358  C5'  DA A  12       2.156  -8.385 -14.170  9.00  0.00           C  
ATOM    359  O5'  DA A  12       0.781  -8.324 -14.530  7.00  0.00           O  
ATOM    360  C4'  DA A  12       2.724  -9.560 -14.990  1.00  0.00           C  
ATOM    361  O4'  DA A  12       2.673  -9.233 -16.380  4.00  0.00           O  
ATOM    362  C3'  DA A  12       4.183  -9.964 -14.740  8.00  0.00           C  
ATOM    363  O3'  DA A  12       4.418 -11.273 -15.300  4.00  0.00           O  
ATOM    364  C2'  DA A  12       4.870  -8.869 -15.570  4.00  0.00           C  
ATOM    365  C1'  DA A  12       3.966  -8.807 -16.800  0.00  0.00           C  
ATOM    366  N1   DA A  12       5.008  -6.344 -21.210  2.00  0.00           N  
ATOM    367  C2   DA A  12       5.068  -7.614 -20.870  5.00  0.00           C  
ATOM    368  N3   DA A  12       4.734  -8.193 -19.720  0.00  0.00           N  
ATOM    369  C4   DA A  12       4.310  -7.254 -18.810  6.00  0.00           C  
ATOM    370  C5   DA A  12       4.189  -5.903 -19.010  1.00  0.00           C  
ATOM    371  C6   DA A  12       4.600  -5.457 -20.300  9.00  0.00           C  
ATOM    372  N6   DA A  12       4.607  -4.202 -20.710  6.00  0.00           N  
ATOM    373  N7   DA A  12       3.698  -5.278 -17.870  6.00  0.00           N  
ATOM    374  C8   DA A  12       3.579  -6.247 -17.000  7.00  0.00           C  
ATOM    375  N9   DA A  12       3.933  -7.484 -17.490  9.00  0.00           N  
ATOM    376  OP1  DA A  12      -1.482  -7.432 -14.710  6.00  0.00           O  
ATOM    377  OP2  DA A  12       0.176  -6.482 -12.990  7.00  0.00           O1-
ATOM    378  H2   DA A  12       5.416  -8.281 -21.640  9.00  0.00           H  
ATOM    379  H8   DA A  12       3.224  -6.079 -15.990  1.00  0.00           H  
ATOM    380  H1'  DA A  12       4.344  -9.549 -17.510  4.00  0.00           H  
ATOM    381  H2'  DA A  12       4.867  -7.918 -15.030  4.00  0.00           H  
ATOM    382  H3'  DA A  12       4.462  -9.904 -13.690  8.00  0.00           H  
ATOM    383  H4'  DA A  12       2.095 -10.420 -14.770  8.00  0.00           H  
ATOM    384  H5'  DA A  12       2.265  -8.556 -13.100  8.00  0.00           H  
ATOM    385  H61  DA A  12       5.240  -3.951 -21.460  9.00  0.00           H  
ATOM    386  H62  DA A  12       4.268  -3.477 -20.080  0.00  0.00           H  
ATOM    387 H2''  DA A  12       5.892  -9.144 -15.830  3.00  0.00           H  
ATOM    388 H5''  DA A  12       2.664  -7.452 -14.420  9.00  0.00           H  
ATOM    389  P    DG A  13       4.183 -12.659 -14.480  6.00  0.00           P  
ATOM    390  C5'  DG A  13       6.469 -12.426 -13.110  5.00  0.00           C  
ATOM    391  O5'  DG A  13       5.659 -13.132 -14.040  7.00  0.00           O  
ATOM    392  C4'  DG A  13       7.862 -13.084 -13.050  8.00  0.00           C  
ATOM    393  O4'  DG A  13       8.647 -12.365 -12.090  0.00  0.00           O  
ATOM    394  C3'  DG A  13       7.830 -14.583 -12.650  3.00  0.00           C  
ATOM    395  O3'  DG A  13       8.780 -15.398 -13.380  9.00  0.00           O  
ATOM    396  C2'  DG A  13       8.105 -14.413 -11.140  4.00  0.00           C  
ATOM    397  C1'  DG A  13       9.078 -13.232 -11.060  8.00  0.00           C  
ATOM    398  N1   DG A  13      11.827 -12.636  -6.750  1.00  0.00           N  
ATOM    399  C2   DG A  13      12.045 -13.373  -7.860  1.00  0.00           C  
ATOM    400  N2   DG A  13      13.111 -14.105  -7.880  3.00  0.00           N  
ATOM    401  N3   DG A  13      11.234 -13.477  -8.900  0.00  0.00           N  
ATOM    402  C4   DG A  13      10.117 -12.705  -8.780  0.00  0.00           C  
ATOM    403  C5   DG A  13       9.768 -11.947  -7.680  1.00  0.00           C  
ATOM    404  C6   DG A  13      10.669 -11.929  -6.540  4.00  0.00           C  
ATOM    405  O6   DG A  13      10.568 -11.417  -5.420  8.00  0.00           O  
ATOM    406  N7   DG A  13       8.538 -11.335  -7.900  5.00  0.00           N  
ATOM    407  C8   DG A  13       8.225 -11.685  -9.130  4.00  0.00           C  
ATOM    408  N9   DG A  13       9.118 -12.556  -9.720  7.00  0.00           N  
ATOM    409  OP1  DG A  13       3.699 -13.696 -15.430  9.00  0.00           O  
ATOM    410  OP2  DG A  13       3.393 -12.395 -13.260  0.00  0.00           O1-
ATOM    411  H1   DG A  13      12.544 -12.593  -6.050  6.00  0.00           H  
ATOM    412  H8   DG A  13       7.340 -11.318  -9.640  3.00  0.00           H  
ATOM    413  H1'  DG A  13      10.084 -13.580 -11.300  1.00  0.00           H  
ATOM    414  H2'  DG A  13       7.177 -14.147 -10.630  0.00  0.00           H  
ATOM    415  H21  DG A  13      13.880 -13.891  -7.260  0.00  0.00           H  
ATOM    416  H3'  DG A  13       6.825 -14.976 -12.810  5.00  0.00           H  
ATOM    417  H22  DG A  13      13.260 -14.639  -8.710  3.00  0.00           H  
ATOM    418  H4'  DG A  13       8.316 -12.990 -14.030  4.00  0.00           H  
ATOM    419  H5'  DG A  13       6.008 -12.428 -12.120  0.00  0.00           H  
ATOM    420 H2''  DG A  13       8.526 -15.312 -10.710  8.00  0.00           H  
ATOM    421 H5''  DG A  13       6.582 -11.388 -13.430  2.00  0.00           H  
ATOM    422  P    DG A  14       8.586 -17.008 -13.660  3.00  0.00           P  
ATOM    423  C5'  DG A  14      10.528 -18.499 -12.600  9.00  0.00           C  
ATOM    424  O5'  DG A  14       9.380 -17.667 -12.420  5.00  0.00           O  
ATOM    425  C4'  DG A  14      11.456 -18.609 -11.370  3.00  0.00           C  
ATOM    426  O4'  DG A  14      10.711 -18.621 -10.150  6.00  0.00           O  
ATOM    427  C3'  DG A  14      12.415 -17.412 -11.240  4.00  0.00           C  
ATOM    428  O3'  DG A  14      13.563 -17.619 -10.410  2.00  0.00           O  
ATOM    429  C2'  DG A  14      11.482 -16.401 -10.590  7.00  0.00           C  
ATOM    430  C1'  DG A  14      10.530 -17.267  -9.750  5.00  0.00           C  
ATOM    431  N1   DG A  14       9.088 -14.759  -5.570  5.00  0.00           N  
ATOM    432  C2   DG A  14       8.397 -15.007  -6.700  7.00  0.00           C  
ATOM    433  N2   DG A  14       7.252 -14.396  -6.820  7.00  0.00           N  
ATOM    434  N3   DG A  14       8.825 -15.769  -7.700  0.00  0.00           N  
ATOM    435  C4   DG A  14      10.054 -16.320  -7.450  3.00  0.00           C  
ATOM    436  C5   DG A  14      10.816 -16.164  -6.310  5.00  0.00           C  
ATOM    437  C6   DG A  14      10.314 -15.302  -5.270  5.00  0.00           C  
ATOM    438  O6   DG A  14      10.814 -14.979  -4.180  5.00  0.00           O  
ATOM    439  N7   DG A  14      12.000 -16.900  -6.410  8.00  0.00           N  
ATOM    440  C8   DG A  14      11.939 -17.421  -7.610  3.00  0.00           C  
ATOM    441  N9   DG A  14      10.807 -17.085  -8.310  2.00  0.00           N  
ATOM    442  OP1  DG A  14       9.299 -17.430 -14.900  4.00  0.00           O  
ATOM    443  OP2  DG A  14       7.166 -17.407 -13.530  5.00  0.00           O1-
ATOM    444  H1   DG A  14       8.673 -14.116  -4.920  0.00  0.00           H  
ATOM    445  H8   DG A  14      12.711 -18.048  -8.040  1.00  0.00           H  
ATOM    446  H1'  DG A  14       9.501 -16.963  -9.940  5.00  0.00           H  
ATOM    447  H2'  DG A  14      12.042 -15.686  -9.990  6.00  0.00           H  
ATOM    448  H21  DG A  14       6.925 -13.706  -6.160  2.00  0.00           H  
ATOM    449  H3'  DG A  14      12.736 -17.058 -12.220  0.00  0.00           H  
ATOM    450  H22  DG A  14       6.745 -14.518  -7.670  7.00  0.00           H  
ATOM    451  H4'  DG A  14      12.034 -19.525 -11.460  6.00  0.00           H  
ATOM    452  H5'  DG A  14      11.127 -18.113 -13.430  4.00  0.00           H  
ATOM    453 H2''  DG A  14      10.913 -15.863 -11.350  3.00  0.00           H  
ATOM    454 H5''  DG A  14      10.186 -19.495 -12.880  0.00  0.00           H  
ATOM    455  P    DG A  15      14.596 -18.855 -10.550  0.00  0.00           P  
ATOM    456  C5'  DG A  15      14.584 -20.471  -8.460  7.00  0.00           C  
ATOM    457  O5'  DG A  15      13.916 -19.975  -9.620  7.00  0.00           O  
ATOM    458  C4'  DG A  15      13.679 -21.244  -7.490  6.00  0.00           C  
ATOM    459  O4'  DG A  15      12.796 -20.330  -6.850  8.00  0.00           O  
ATOM    460  C3'  DG A  15      12.826 -22.349  -8.150  0.00  0.00           C  
ATOM    461  O3'  DG A  15      12.918 -23.586  -7.440  5.00  0.00           O  
ATOM    462  C2'  DG A  15      11.444 -21.724  -7.970  2.00  0.00           C  
ATOM    463  C1'  DG A  15      11.587 -21.019  -6.620  8.00  0.00           C  
ATOM    464  N1   DG A  15       9.649 -17.748  -3.170  9.00  0.00           N  
ATOM    465  C2   DG A  15      10.748 -18.531  -3.100  7.00  0.00           C  
ATOM    466  N2   DG A  15      11.486 -18.417  -2.040  4.00  0.00           N  
ATOM    467  N3   DG A  15      11.101 -19.417  -4.020  0.00  0.00           N  
ATOM    468  C4   DG A  15      10.258 -19.438  -5.100  9.00  0.00           C  
ATOM    469  C5   DG A  15       9.068 -18.747  -5.220  3.00  0.00           C  
ATOM    470  C6   DG A  15       8.711 -17.829  -4.170  3.00  0.00           C  
ATOM    471  O6   DG A  15       7.756 -17.058  -4.060  0.00  0.00           O  
ATOM    472  N7   DG A  15       8.454 -19.052  -6.450  0.00  0.00           N  
ATOM    473  C8   DG A  15       9.326 -19.826  -7.040  8.00  0.00           C  
ATOM    474  N9   DG A  15      10.438 -20.128  -6.280  0.00  0.00           N  
ATOM    475  OP1  DG A  15      15.887 -18.475  -9.940  2.00  0.00           O  
ATOM    476  OP2  DG A  15      14.602 -19.384 -11.940  3.00  0.00           O1-
ATOM    477  H1   DG A  15       9.588 -16.968  -2.560  6.00  0.00           H  
ATOM    478  H8   DG A  15       9.185 -20.201  -8.040  9.00  0.00           H  
ATOM    479  H1'  DG A  15      11.740 -21.743  -5.810  5.00  0.00           H  
ATOM    480  H2'  DG A  15      11.288 -20.979  -8.760  8.00  0.00           H  
ATOM    481  H21  DG A  15      11.320 -17.744  -1.300  5.00  0.00           H  
ATOM    482  H3'  DG A  15      13.080 -22.471  -9.200  6.00  0.00           H  
ATOM    483  H22  DG A  15      12.225 -19.094  -1.940  3.00  0.00           H  
ATOM    484  H4'  DG A  15      14.298 -21.705  -6.720  6.00  0.00           H  
ATOM    485  H5'  DG A  15      15.014 -19.634  -7.910  1.00  0.00           H  
ATOM    486 H2''  DG A  15      10.652 -22.470  -7.970  0.00  0.00           H  
ATOM    487 H5''  DG A  15      15.392 -21.120  -8.790  1.00  0.00           H  
ATOM    488  P    DT A  16      12.719 -25.023  -8.150  2.00  0.00           P  
ATOM    489  C5'  DT A  16      11.760 -26.288  -6.020  6.00  0.00           C  
ATOM    490  O5'  DT A  16      12.845 -26.060  -6.920  6.00  0.00           O  
ATOM    491  C4'  DT A  16      11.405 -25.059  -5.160  5.00  0.00           C  
ATOM    492  O4'  DT A  16      10.237 -25.341  -4.410  4.00  0.00           O  
ATOM    493  C3'  DT A  16      12.534 -24.744  -4.180  3.00  0.00           C  
ATOM    494  O3'  DT A  16      12.725 -23.354  -3.980  6.00  0.00           O  
ATOM    495  C2'  DT A  16      12.034 -25.433  -2.910  2.00  0.00           C  
ATOM    496  C1'  DT A  16      10.528 -25.213  -3.030  6.00  0.00           C  
ATOM    497  N1   DT A  16       9.726 -26.197  -2.250  7.00  0.00           N  
ATOM    498  C2   DT A  16       9.047 -25.755  -1.110  8.00  0.00           C  
ATOM    499  O2   DT A  16       9.152 -24.621  -0.650  7.00  0.00           O  
ATOM    500  N3   DT A  16       8.251 -26.675  -0.470  4.00  0.00           N  
ATOM    501  C4   DT A  16       8.116 -28.002  -0.810  0.00  0.00           C  
ATOM    502  O4   DT A  16       7.409 -28.706  -0.100  9.00  0.00           O  
ATOM    503  C5   DT A  16       8.877 -28.412  -1.990  4.00  0.00           C  
ATOM    504  C6   DT A  16       9.633 -27.509  -2.670  2.00  0.00           C  
ATOM    505  C7   DT A  16       8.804 -29.833  -2.530  7.00  0.00           C  
ATOM    506  OP1  DT A  16      13.878 -25.270  -9.040  5.00  0.00           O  
ATOM    507  OP2  DT A  16      11.340 -25.114  -8.680  1.00  0.00           O1-
ATOM    508  H3   DT A  16       7.685 -26.346   0.280  1.00  0.00           H  
ATOM    509  H6   DT A  16      10.151 -27.815  -3.570  1.00  0.00           H  
ATOM    510  H1'  DT A  16      10.297 -24.194  -2.710  3.00  0.00           H  
ATOM    511  H2'  DT A  16      12.282 -26.494  -2.940  6.00  0.00           H  
ATOM    512  H3'  DT A  16      13.467 -25.184  -4.530  6.00  0.00           H  
ATOM    513  H4'  DT A  16      11.216 -24.198  -5.800  9.00  0.00           H  
ATOM    514  H5'  DT A  16      12.018 -27.110  -5.350  2.00  0.00           H  
ATOM    515  H71  DT A  16       8.864 -29.839  -3.620  1.00  0.00           H  
ATOM    516  H72  DT A  16       9.615 -30.425  -2.100  9.00  0.00           H  
ATOM    517  H73  DT A  16       7.856 -30.288  -2.240  4.00  0.00           H  
ATOM    518 H2''  DT A  16      12.430 -24.962  -2.010  8.00  0.00           H  
ATOM    519 H5''  DT A  16      10.888 -26.591  -6.600  4.00  0.00           H  
ATOM    520  P    DT A  17      14.063 -22.803  -3.270  5.00  0.00           P  
ATOM    521  C5'  DT A  17      14.129 -21.472  -0.990  7.00  0.00           C  
ATOM    522  O5'  DT A  17      13.507 -22.460  -1.800  6.00  0.00           O  
ATOM    523  C4'  DT A  17      13.327 -21.107   0.260  4.00  0.00           C  
ATOM    524  O4'  DT A  17      12.114 -20.483  -0.120  2.00  0.00           O  
ATOM    525  C3'  DT A  17      12.942 -22.292   1.170  6.00  0.00           C  
ATOM    526  O3'  DT A  17      12.838 -21.875   2.520  2.00  0.00           O  
ATOM    527  C2'  DT A  17      11.532 -22.601   0.680  3.00  0.00           C  
ATOM    528  C1'  DT A  17      11.024 -21.177   0.450  6.00  0.00           C  
ATOM    529  N1   DT A  17       9.842 -21.114  -0.440  4.00  0.00           N  
ATOM    530  C2   DT A  17       8.628 -20.654   0.080  1.00  0.00           C  
ATOM    531  O2   DT A  17       8.459 -20.410   1.270  7.00  0.00           O  
ATOM    532  N3   DT A  17       7.582 -20.517  -0.800  8.00  0.00           N  
ATOM    533  C4   DT A  17       7.568 -20.997  -2.090  3.00  0.00           C  
ATOM    534  O4   DT A  17       6.530 -20.913  -2.740  6.00  0.00           O  
ATOM    535  C5   DT A  17       8.833 -21.574  -2.550  1.00  0.00           C  
ATOM    536  C6   DT A  17       9.927 -21.568  -1.740  2.00  0.00           C  
ATOM    537  C7   DT A  17       8.946 -22.181  -3.930  4.00  0.00           C  
ATOM    538  OP1  DT A  17      14.507 -21.561  -3.930  3.00  0.00           O  
ATOM    539  OP2  DT A  17      15.037 -23.915  -3.100  9.00  0.00           O1-
ATOM    540  H3   DT A  17       6.740 -20.070  -0.460  4.00  0.00           H  
ATOM    541  H6   DT A  17      10.882 -21.929  -2.110  3.00  0.00           H  
ATOM    542  H1'  DT A  17      10.804 -20.720   1.420  3.00  0.00           H  
ATOM    543  H2'  DT A  17      11.555 -23.177  -0.230  3.00  0.00           H  
ATOM    544  H3'  DT A  17      13.614 -23.143   1.050  7.00  0.00           H  
ATOM    545  H4'  DT A  17      13.913 -20.395   0.840  1.00  0.00           H  
ATOM    546  H5'  DT A  17      14.259 -20.562  -1.580  8.00  0.00           H  
ATOM    547  H71  DT A  17       9.989 -22.372  -4.190  7.00  0.00           H  
ATOM    548  H72  DT A  17       8.511 -21.504  -4.660  1.00  0.00           H  
ATOM    549  H73  DT A  17       8.384 -23.114  -3.960  8.00  0.00           H  
ATOM    550 H2''  DT A  17      10.947 -23.116   1.440  9.00  0.00           H  
ATOM    551 H5''  DT A  17      15.112 -21.831  -0.700  6.00  0.00           H  
ATOM    552  P    DA A  18      13.839 -22.354   3.670  9.00  0.00           P  
ATOM    553  C5'  DA A  18      14.518 -19.835   4.230  6.00  0.00           C  
ATOM    554  O5'  DA A  18      13.796 -21.024   4.590  6.00  0.00           O  
ATOM    555  C4'  DA A  18      13.905 -18.497   4.700  4.00  0.00           C  
ATOM    556  O4'  DA A  18      12.797 -18.104   3.890  4.00  0.00           O  
ATOM    557  C3'  DA A  18      13.424 -18.487   6.170  2.00  0.00           C  
ATOM    558  O3'  DA A  18      14.062 -17.516   7.000  0.00  0.00           O  
ATOM    559  C2'  DA A  18      11.944 -18.124   6.000  3.00  0.00           C  
ATOM    560  C1'  DA A  18      11.966 -17.303   4.710  9.00  0.00           C  
ATOM    561  N1   DA A  18       7.861 -14.257   4.950  6.00  0.00           N  
ATOM    562  C2   DA A  18       8.924 -14.380   5.730  7.00  0.00           C  
ATOM    563  N3   DA A  18       9.902 -15.271   5.620  6.00  0.00           N  
ATOM    564  C4   DA A  18       9.748 -16.069   4.530  3.00  0.00           C  
ATOM    565  C5   DA A  18       8.718 -16.045   3.620  8.00  0.00           C  
ATOM    566  C6   DA A  18       7.728 -15.067   3.910  9.00  0.00           C  
ATOM    567  N6   DA A  18       6.625 -14.794   3.240  5.00  0.00           N  
ATOM    568  N7   DA A  18       8.933 -16.994   2.600  0.00  0.00           N  
ATOM    569  C8   DA A  18      10.058 -17.569   2.970  2.00  0.00           C  
ATOM    570  N9   DA A  18      10.625 -17.045   4.110  2.00  0.00           N  
ATOM    571  OP1  DA A  18      15.199 -22.505   3.100  0.00  0.00           O  
ATOM    572  OP2  DA A  18      13.233 -23.520   4.360  5.00  0.00           O1-
ATOM    573  H2   DA A  18       8.990 -13.689   6.560  1.00  0.00           H  
ATOM    574  H8   DA A  18      10.533 -18.364   2.400  5.00  0.00           H  
ATOM    575  H1'  DA A  18      12.453 -16.341   4.920  2.00  0.00           H  
ATOM    576  H2'  DA A  18      11.355 -19.029   5.850  0.00  0.00           H  
ATOM    577  H3'  DA A  18      13.510 -19.480   6.610  5.00  0.00           H  
ATOM    578  H4'  DA A  18      14.668 -17.720   4.600  5.00  0.00           H  
ATOM    579  H5'  DA A  18      14.600 -19.778   3.140  4.00  0.00           H  
ATOM    580  H61  DA A  18       6.077 -14.035   3.630  1.00  0.00           H  
ATOM    581  H62  DA A  18       6.267 -15.372   2.490  3.00  0.00           H  
ATOM    582 H2''  DA A  18      11.574 -17.535   6.840  6.00  0.00           H  
ATOM    583 H5''  DA A  18      15.525 -19.905   4.640  9.00  0.00           H  
ATOM    584  P    DG A  19      15.481 -17.802   7.720  7.00  0.00           P  
ATOM    585  C5'  DG A  19      16.856 -16.286   6.020  1.00  0.00           C  
ATOM    586  O5'  DG A  19      16.557 -17.585   6.530  7.00  0.00           O  
ATOM    587  C4'  DG A  19      17.810 -16.380   4.810  7.00  0.00           C  
ATOM    588  O4'  DG A  19      17.209 -17.069   3.700  0.00  0.00           O  
ATOM    589  C3'  DG A  19      18.259 -15.023   4.260  8.00  0.00           C  
ATOM    590  O3'  DG A  19      19.532 -15.228   3.650  5.00  0.00           O  
ATOM    591  C2'  DG A  19      17.132 -14.751   3.270  9.00  0.00           C  
ATOM    592  C1'  DG A  19      17.025 -16.136   2.630  1.00  0.00           C  
ATOM    593  N1   DG A  19      12.004 -15.123   1.770  4.00  0.00           N  
ATOM    594  C2   DG A  19      12.830 -14.661   2.730  1.00  0.00           C  
ATOM    595  N2   DG A  19      12.379 -13.744   3.540  2.00  0.00           N  
ATOM    596  N3   DG A  19      14.072 -15.073   2.920  2.00  0.00           N  
ATOM    597  C4   DG A  19      14.511 -15.951   1.970  0.00  0.00           C  
ATOM    598  C5   DG A  19      13.755 -16.488   0.950  3.00  0.00           C  
ATOM    599  C6   DG A  19      12.365 -16.078   0.840  6.00  0.00           C  
ATOM    600  O6   DG A  19      11.472 -16.414   0.050  1.00  0.00           O  
ATOM    601  N7   DG A  19      14.557 -17.330   0.160  6.00  0.00           N  
ATOM    602  C8   DG A  19      15.742 -17.226   0.700  3.00  0.00           C  
ATOM    603  N9   DG A  19      15.803 -16.431   1.820  2.00  0.00           N  
ATOM    604  OP1  DG A  19      15.528 -19.231   8.110  2.00  0.00           O  
ATOM    605  OP2  DG A  19      15.731 -16.780   8.760  6.00  0.00           O1-
ATOM    606  H1   DG A  19      11.097 -14.705   1.700  0.00  0.00           H  
ATOM    607  H8   DG A  19      16.615 -17.724   0.300  1.00  0.00           H  
ATOM    608  H1'  DG A  19      17.891 -16.196   1.970  2.00  0.00           H  
ATOM    609  H2'  DG A  19      16.245 -14.469   3.830  2.00  0.00           H  
ATOM    610  H21  DG A  19      11.494 -13.273   3.410  6.00  0.00           H  
ATOM    611  H3'  DG A  19      18.310 -14.246   5.030  7.00  0.00           H  
ATOM    612  H22  DG A  19      13.037 -13.382   4.210  8.00  0.00           H  
ATOM    613  H4'  DG A  19      18.699 -16.913   5.140  7.00  0.00           H  
ATOM    614  H5'  DG A  19      17.331 -15.694   6.810  8.00  0.00           H  
ATOM    615 H2''  DG A  19      17.381 -13.971   2.560  2.00  0.00           H  
ATOM    616 H5''  DG A  19      15.937 -15.777   5.720  2.00  0.00           H  
ATOM    617  P    DG A  20      20.339 -14.047   2.930  1.00  0.00           P  
ATOM    618  C5'  DG A  20      20.836 -14.943   0.520  6.00  0.00           C  
ATOM    619  O5'  DG A  20      19.927 -14.295   1.390  1.00  0.00           O  
ATOM    620  C4'  DG A  20      20.328 -15.200  -0.890  1.00  0.00           C  
ATOM    621  O4'  DG A  20      19.105 -15.936  -0.950  1.00  0.00           O  
ATOM    622  C3'  DG A  20      20.161 -13.930  -1.710  2.00  0.00           C  
ATOM    623  O3'  DG A  20      21.396 -13.629  -2.320  6.00  0.00           O  
ATOM    624  C2'  DG A  20      19.160 -14.394  -2.750  6.00  0.00           C  
ATOM    625  C1'  DG A  20      18.278 -15.354  -1.960  1.00  0.00           C  
ATOM    626  N1   DG A  20      13.278 -14.654  -2.600  0.00  0.00           N  
ATOM    627  C2   DG A  20      14.194 -15.306  -3.350  2.00  0.00           C  
ATOM    628  N2   DG A  20      13.776 -15.773  -4.480  7.00  0.00           N  
ATOM    629  N3   DG A  20      15.490 -15.403  -3.080  8.00  0.00           N  
ATOM    630  C4   DG A  20      15.825 -14.751  -1.930  2.00  0.00           C  
ATOM    631  C5   DG A  20      14.989 -14.023  -1.100  4.00  0.00           C  
ATOM    632  C6   DG A  20      13.592 -13.934  -1.470  5.00  0.00           C  
ATOM    633  O6   DG A  20      12.663 -13.306  -0.950  7.00  0.00           O  
ATOM    634  N7   DG A  20      15.731 -13.450  -0.070  9.00  0.00           N  
ATOM    635  C8   DG A  20      16.964 -13.826  -0.310  3.00  0.00           C  
ATOM    636  N9   DG A  20      17.087 -14.671  -1.390  9.00  0.00           N  
ATOM    637  OP1  DG A  20      21.775 -14.396   3.120  5.00  0.00           O  
ATOM    638  OP2  DG A  20      19.801 -12.765   3.420  3.00  0.00           O1-
ATOM    639  H1   DG A  20      12.326 -14.672  -2.910  8.00  0.00           H  
ATOM    640  H8   DG A  20      17.811 -13.515   0.290  7.00  0.00           H  
ATOM    641  H1'  DG A  20      17.909 -16.120  -2.640  7.00  0.00           H  
ATOM    642  H2'  DG A  20      18.600 -13.559  -3.140  7.00  0.00           H  
ATOM    643  H21  DG A  20      12.798 -15.760  -4.740  7.00  0.00           H  
ATOM    644  H3'  DG A  20      19.768 -13.115  -1.090  6.00  0.00           H  
ATOM    645  H22  DG A  20      14.422 -16.248  -5.070  6.00  0.00           H  
ATOM    646  H4'  DG A  20      21.089 -15.781  -1.410  0.00  0.00           H  
ATOM    647  H5'  DG A  20      21.124 -15.894   0.970  3.00  0.00           H  
ATOM    648 H2''  DG A  20      19.667 -14.912  -3.560  7.00  0.00           H  
ATOM    649 H5''  DG A  20      21.723 -14.309   0.450  7.00  0.00           H  
ATOM    650  P    DG A  21      21.680 -12.172  -2.940  0.00  0.00           P  
ATOM    651  C5'  DG A  21      22.016 -13.055  -5.380  5.00  0.00           C  
ATOM    652  O5'  DG A  21      21.211 -12.353  -4.460  2.00  0.00           O  
ATOM    653  C4'  DG A  21      21.496 -13.064  -6.820  6.00  0.00           C  
ATOM    654  O4'  DG A  21      20.199 -13.667  -6.950  3.00  0.00           O  
ATOM    655  C3'  DG A  21      21.472 -11.697  -7.520  7.00  0.00           C  
ATOM    656  O3'  DG A  21      22.017 -11.847  -8.820  7.00  0.00           O  
ATOM    657  C2'  DG A  21      19.987 -11.379  -7.600  9.00  0.00           C  
ATOM    658  C1'  DG A  21      19.364 -12.772  -7.690  6.00  0.00           C  
ATOM    659  N1   DG A  21      15.923 -11.682  -3.950  8.00  0.00           N  
ATOM    660  C2   DG A  21      17.264 -11.493  -3.980  1.00  0.00           C  
ATOM    661  N2   DG A  21      17.820 -11.066  -2.880  7.00  0.00           N  
ATOM    662  N3   DG A  21      18.041 -11.852  -5.000  7.00  0.00           N  
ATOM    663  C4   DG A  21      17.386 -12.404  -6.050  8.00  0.00           C  
ATOM    664  C5   DG A  21      16.034 -12.660  -6.110  7.00  0.00           C  
ATOM    665  C6   DG A  21      15.212 -12.267  -4.980  7.00  0.00           C  
ATOM    666  O6   DG A  21      13.987 -12.336  -4.810  8.00  0.00           O  
ATOM    667  N7   DG A  21      15.732 -13.269  -7.330  9.00  0.00           N  
ATOM    668  C8   DG A  21      16.867 -13.305  -7.970  5.00  0.00           C  
ATOM    669  N9   DG A  21      17.932 -12.807  -7.260  2.00  0.00           N  
ATOM    670  OP1  DG A  21      23.155 -12.028  -2.890  2.00  0.00           O  
ATOM    671  OP2  DG A  21      20.771 -11.223  -2.270  9.00  0.00           O1-
ATOM    672  H1   DG A  21      15.462 -11.442  -3.090  8.00  0.00           H  
ATOM    673  H8   DG A  21      16.956 -13.686  -8.980  0.00  0.00           H  
ATOM    674  H1'  DG A  21      19.426 -13.059  -8.740  0.00  0.00           H  
ATOM    675  H2'  DG A  21      19.671 -10.847  -6.700  4.00  0.00           H  
ATOM    676  H21  DG A  21      17.304 -10.703  -2.090  1.00  0.00           H  
ATOM    677  H3'  DG A  21      21.993 -10.926  -6.940  9.00  0.00           H  
ATOM    678  H22  DG A  21      18.840 -10.988  -2.870  3.00  0.00           H  
ATOM    679  H4'  DG A  21      22.207 -13.664  -7.390  1.00  0.00           H  
ATOM    680  H5'  DG A  21      22.109 -14.080  -5.030  4.00  0.00           H  
ATOM    681 H2''  DG A  21      19.759 -10.787  -8.490  3.00  0.00           H  
ATOM    682 H5''  DG A  21      23.005 -12.593  -5.380  9.00  0.00           H  
ATOM    683  P    DT A  22      23.454 -11.224  -9.210  7.00  0.00           P  
ATOM    684  C5'  DT A  22      22.207  -9.048 -10.150  8.00  0.00           C  
ATOM    685  O5'  DT A  22      23.170  -9.626  -9.260  4.00  0.00           O  
ATOM    686  C4'  DT A  22      21.926  -7.534  -9.970  1.00  0.00           C  
ATOM    687  O4'  DT A  22      20.849  -7.207 -10.850  3.00  0.00           O  
ATOM    688  C3'  DT A  22      21.489  -7.088  -8.560  9.00  0.00           C  
ATOM    689  O3'  DT A  22      22.006  -5.798  -8.250  4.00  0.00           O  
ATOM    690  C2'  DT A  22      19.968  -7.060  -8.700  8.00  0.00           C  
ATOM    691  C1'  DT A  22      19.809  -6.548 -10.130  4.00  0.00           C  
ATOM    692  N1   DT A  22      18.465  -6.875 -10.700  4.00  0.00           N  
ATOM    693  C2   DT A  22      17.539  -5.841 -10.880  9.00  0.00           C  
ATOM    694  O2   DT A  22      17.797  -4.673 -10.650  8.00  0.00           O  
ATOM    695  N3   DT A  22      16.307  -6.182 -11.400  8.00  0.00           N  
ATOM    696  C4   DT A  22      15.932  -7.444 -11.810  0.00  0.00           C  
ATOM    697  O4   DT A  22      14.824  -7.627 -12.310  1.00  0.00           O  
ATOM    698  C5   DT A  22      16.955  -8.476 -11.610  1.00  0.00           C  
ATOM    699  C6   DT A  22      18.159  -8.169 -11.060  4.00  0.00           C  
ATOM    700  C7   DT A  22      16.686  -9.909 -12.050  8.00  0.00           C  
ATOM    701  OP1  DT A  22      23.795 -11.712 -10.570  4.00  0.00           O  
ATOM    702  OP2  DT A  22      24.409 -11.543  -8.120  2.00  0.00           O1-
ATOM    703  H3   DT A  22      15.670  -5.417 -11.560  7.00  0.00           H  
ATOM    704  H6   DT A  22      18.921  -8.921 -10.940  4.00  0.00           H  
ATOM    705  H1'  DT A  22      19.975  -5.462 -10.130  1.00  0.00           H  
ATOM    706  H2'  DT A  22      19.564  -8.065  -8.600  0.00  0.00           H  
ATOM    707  H3'  DT A  22      21.812  -7.813  -7.810  7.00  0.00           H  
ATOM    708  H4'  DT A  22      22.810  -6.963 -10.260  0.00  0.00           H  
ATOM    709  H5'  DT A  22      21.259  -9.571 -10.040  1.00  0.00           H  
ATOM    710  H71  DT A  22      16.601  -9.934 -13.130  6.00  0.00           H  
ATOM    711  H72  DT A  22      17.484 -10.572 -11.720  6.00  0.00           H  
ATOM    712  H73  DT A  22      15.736 -10.234 -11.620  1.00  0.00           H  
ATOM    713 H2''  DT A  22      19.501  -6.380  -7.990  0.00  0.00           H  
ATOM    714 H5''  DT A  22      22.547  -9.203 -11.180  3.00  0.00           H  
ATOM    715  P    DT A  23      21.994  -5.214  -6.730  1.00  0.00           P  
ATOM    716  C5'  DT A  23      20.233  -3.207  -7.030  8.00  0.00           C  
ATOM    717  O5'  DT A  23      20.534  -4.527  -6.550  9.00  0.00           O  
ATOM    718  C4'  DT A  23      18.736  -2.814  -7.030  6.00  0.00           C  
ATOM    719  O4'  DT A  23      17.945  -3.768  -7.740  6.00  0.00           O  
ATOM    720  C3'  DT A  23      18.084  -2.671  -5.640  4.00  0.00           C  
ATOM    721  O3'  DT A  23      17.325  -1.476  -5.620  1.00  0.00           O  
ATOM    722  C2'  DT A  23      17.174  -3.890  -5.590  5.00  0.00           C  
ATOM    723  C1'  DT A  23      16.709  -3.902  -7.050  8.00  0.00           C  
ATOM    724  N1   DT A  23      16.012  -5.149  -7.470  5.00  0.00           N  
ATOM    725  C2   DT A  23      14.883  -5.063  -8.310  4.00  0.00           C  
ATOM    726  O2   DT A  23      14.448  -4.044  -8.830  4.00  0.00           O  
ATOM    727  N3   DT A  23      14.241  -6.246  -8.610  0.00  0.00           N  
ATOM    728  C4   DT A  23      14.644  -7.502  -8.210  3.00  0.00           C  
ATOM    729  O4   DT A  23      13.973  -8.492  -8.500  1.00  0.00           O  
ATOM    730  C5   DT A  23      15.887  -7.531  -7.450  7.00  0.00           C  
ATOM    731  C6   DT A  23      16.512  -6.379  -7.090  1.00  0.00           C  
ATOM    732  C7   DT A  23      16.489  -8.859  -7.020  2.00  0.00           C  
ATOM    733  OP1  DT A  23      23.052  -4.184  -6.640  2.00  0.00           O  
ATOM    734  OP2  DT A  23      22.097  -6.372  -5.810  6.00  0.00           O1-
ATOM    735  H3   DT A  23      13.408  -6.155  -9.160  7.00  0.00           H  
ATOM    736  H6   DT A  23      17.431  -6.405  -6.530  7.00  0.00           H  
ATOM    737  H1'  DT A  23      16.069  -3.024  -7.210  2.00  0.00           H  
ATOM    738  H2'  DT A  23      17.783  -4.749  -5.320  1.00  0.00           H  
ATOM    739  H3'  DT A  23      18.822  -2.673  -4.840  0.00  0.00           H  
ATOM    740  H4'  DT A  23      18.637  -1.842  -7.520  2.00  0.00           H  
ATOM    741  H5'  DT A  23      20.595  -3.097  -8.050  9.00  0.00           H  
ATOM    742  H71  DT A  23      16.902  -9.357  -7.890  5.00  0.00           H  
ATOM    743  H72  DT A  23      17.262  -8.709  -6.260  9.00  0.00           H  
ATOM    744  H73  DT A  23      15.710  -9.491  -6.610  7.00  0.00           H  
ATOM    745 H2''  DT A  23      16.348  -3.773  -4.890  8.00  0.00           H  
ATOM    746 H5''  DT A  23      20.767  -2.481  -6.410  8.00  0.00           H  
ATOM    747  P    DA A  24      16.593  -0.986  -4.280  5.00  0.00           P  
ATOM    748  C5'  DA A  24      14.206  -0.958  -5.420  1.00  0.00           C  
ATOM    749  O5'  DA A  24      15.102  -1.568  -4.500  4.00  0.00           O  
ATOM    750  C4'  DA A  24      12.801  -1.587  -5.440  7.00  0.00           C  
ATOM    751  O4'  DA A  24      12.832  -2.902  -6.020  5.00  0.00           O  
ATOM    752  C3'  DA A  24      12.104  -1.694  -4.060  4.00  0.00           C  
ATOM    753  O3'  DA A  24      10.757  -1.225  -4.140  6.00  0.00           O  
ATOM    754  C2'  DA A  24      12.142  -3.200  -3.830  7.00  0.00           C  
ATOM    755  C1'  DA A  24      11.925  -3.670  -5.260  9.00  0.00           C  
ATOM    756  N1   DA A  24      14.564  -8.083  -4.190  0.00  0.00           N  
ATOM    757  C2   DA A  24      14.818  -6.815  -3.840  5.00  0.00           C  
ATOM    758  N3   DA A  24      14.124  -5.742  -4.170  8.00  0.00           N  
ATOM    759  C4   DA A  24      13.035  -5.985  -4.960  1.00  0.00           C  
ATOM    760  C5   DA A  24      12.675  -7.219  -5.410  4.00  0.00           C  
ATOM    761  C6   DA A  24      13.542  -8.243  -5.020  7.00  0.00           C  
ATOM    762  N6   DA A  24      13.409  -9.490  -5.420  2.00  0.00           N  
ATOM    763  N7   DA A  24      11.524  -7.205  -6.190  7.00  0.00           N  
ATOM    764  C8   DA A  24      11.227  -5.929  -6.200  1.00  0.00           C  
ATOM    765  N9   DA A  24      12.067  -5.131  -5.460  2.00  0.00           N  
ATOM    766  OP1  DA A  24      16.587   0.492  -4.330  9.00  0.00           O  
ATOM    767  OP2  DA A  24      17.249  -1.721  -3.180  1.00  0.00           O1-
ATOM    768  H2   DA A  24      15.676  -6.636  -3.200  1.00  0.00           H  
ATOM    769  H8   DA A  24      10.372  -5.525  -6.730  4.00  0.00           H  
ATOM    770  H1'  DA A  24      10.911  -3.367  -5.540  2.00  0.00           H  
ATOM    771  H2'  DA A  24      13.119  -3.483  -3.440  2.00  0.00           H  
ATOM    772  H3'  DA A  24      12.662  -1.159  -3.290  2.00  0.00           H  
ATOM    773  H4'  DA A  24      12.177  -0.951  -6.070  8.00  0.00           H  
ATOM    774  H5'  DA A  24      14.631  -1.017  -6.420  1.00  0.00           H  
ATOM    775  H61  DA A  24      14.299  -9.958  -5.450  1.00  0.00           H  
ATOM    776  H62  DA A  24      12.792  -9.550  -6.220  4.00  0.00           H  
ATOM    777 H2''  DA A  24      11.341  -3.547  -3.180  8.00  0.00           H  
ATOM    778 H5''  DA A  24      14.103   0.096  -5.160  4.00  0.00           H  
ATOM    779  P    DG A  25       9.770  -1.156  -2.850  1.00  0.00           P  
ATOM    780  C5'  DG A  25       7.624  -1.775  -4.250  7.00  0.00           C  
ATOM    781  O5'  DG A  25       8.608  -2.155  -3.300  5.00  0.00           O  
ATOM    782  C4'  DG A  25       6.627  -2.909  -4.570  7.00  0.00           C  
ATOM    783  O4'  DG A  25       7.357  -4.130  -4.650  4.00  0.00           O  
ATOM    784  C3'  DG A  25       5.516  -3.193  -3.540  9.00  0.00           C  
ATOM    785  O3'  DG A  25       4.516  -3.956  -4.230  2.00  0.00           O  
ATOM    786  C2'  DG A  25       6.299  -3.989  -2.500  4.00  0.00           C  
ATOM    787  C1'  DG A  25       7.085  -4.875  -3.470  6.00  0.00           C  
ATOM    788  N1   DG A  25       9.794  -9.020  -4.220  1.00  0.00           N  
ATOM    789  C2   DG A  25       8.749  -8.471  -4.880  8.00  0.00           C  
ATOM    790  N2   DG A  25       8.275  -9.088  -5.920  0.00  0.00           N  
ATOM    791  N3   DG A  25       8.128  -7.382  -4.530  6.00  0.00           N  
ATOM    792  C4   DG A  25       8.734  -6.721  -3.500  2.00  0.00           C  
ATOM    793  C5   DG A  25       9.844  -7.119  -2.800  1.00  0.00           C  
ATOM    794  C6   DG A  25      10.413  -8.400  -3.150  2.00  0.00           C  
ATOM    795  O6   DG A  25      11.353  -9.050  -2.670  3.00  0.00           O  
ATOM    796  N7   DG A  25      10.196  -6.137  -1.870  9.00  0.00           N  
ATOM    797  C8   DG A  25       9.277  -5.200  -2.040  0.00  0.00           C  
ATOM    798  N9   DG A  25       8.321  -5.531  -2.980  3.00  0.00           N  
ATOM    799  OP1  DG A  25       9.199   0.202  -2.740  4.00  0.00           O  
ATOM    800  OP2  DG A  25      10.402  -1.806  -1.680  8.00  0.00           O1-
ATOM    801  H1   DG A  25      10.311  -9.679  -4.760  5.00  0.00           H  
ATOM    802  H8   DG A  25       9.265  -4.248  -1.500  9.00  0.00           H  
ATOM    803  H1'  DG A  25       6.388  -5.663  -3.760  4.00  0.00           H  
ATOM    804  H2'  DG A  25       6.946  -3.338  -1.910  6.00  0.00           H  
ATOM    805  H21  DG A  25       8.721  -9.850  -6.400  4.00  0.00           H  
ATOM    806  H3'  DG A  25       5.096  -2.272  -3.130  4.00  0.00           H  
ATOM    807  H22  DG A  25       7.567  -8.550  -6.400  9.00  0.00           H  
ATOM    808  H4'  DG A  25       6.158  -2.691  -5.530  8.00  0.00           H  
ATOM    809  H5'  DG A  25       8.129  -1.490  -5.180  7.00  0.00           H  
ATOM    810 H2''  DG A  25       5.637  -4.564  -1.850  5.00  0.00           H  
ATOM    811 H5''  DG A  25       7.077  -0.907  -3.880  5.00  0.00           H  
ATOM    812  P    DG A  26       3.092  -4.391  -3.600  3.00  0.00           P  
ATOM    813  C5'  DG A  26       3.538  -6.969  -3.970  9.00  0.00           C  
ATOM    814  O5'  DG A  26       3.407  -5.881  -3.070  2.00  0.00           O  
ATOM    815  C4'  DG A  26       2.208  -7.632  -4.410  7.00  0.00           C  
ATOM    816  O4'  DG A  26       2.559  -8.716  -5.280  1.00  0.00           O  
ATOM    817  C3'  DG A  26       1.355  -8.264  -3.280  8.00  0.00           C  
ATOM    818  O3'  DG A  26      -0.004  -8.476  -3.700  3.00  0.00           O  
ATOM    819  C2'  DG A  26       2.136  -9.563  -3.110  1.00  0.00           C  
ATOM    820  C1'  DG A  26       2.495  -9.939  -4.560  0.00  0.00           C  
ATOM    821  N1   DG A  26       7.331 -10.919  -3.000  7.00  0.00           N  
ATOM    822  C2   DG A  26       6.465  -9.976  -2.610  1.00  0.00           C  
ATOM    823  N2   DG A  26       6.813  -9.266  -1.570  3.00  0.00           N  
ATOM    824  N3   DG A  26       5.252  -9.855  -3.080  3.00  0.00           N  
ATOM    825  C4   DG A  26       4.939 -10.676  -4.110  9.00  0.00           C  
ATOM    826  C5   DG A  26       5.768 -11.636  -4.650  3.00  0.00           C  
ATOM    827  C6   DG A  26       7.063 -11.808  -4.030  1.00  0.00           C  
ATOM    828  O6   DG A  26       7.954 -12.643  -4.220  9.00  0.00           O  
ATOM    829  N7   DG A  26       5.122 -12.318  -5.690  1.00  0.00           N  
ATOM    830  C8   DG A  26       3.943 -11.730  -5.740  8.00  0.00           C  
ATOM    831  N9   DG A  26       3.734 -10.755  -4.780  0.00  0.00           N  
ATOM    832  OP1  DG A  26       2.111  -4.516  -4.700  8.00  0.00           O  
ATOM    833  OP2  DG A  26       2.803  -3.534  -2.440  1.00  0.00           O1-
ATOM    834  H1   DG A  26       8.090 -11.028  -2.370  8.00  0.00           H  
ATOM    835  H8   DG A  26       3.171 -11.987  -6.450  1.00  0.00           H  
ATOM    836  H1'  DG A  26       1.638 -10.489  -4.940  3.00  0.00           H  
ATOM    837  H2'  DG A  26       2.994  -9.349  -2.480  1.00  0.00           H  
ATOM    838  H21  DG A  26       7.725  -9.257  -1.150  0.00  0.00           H  
ATOM    839  H3'  DG A  26       1.385  -7.649  -2.380  2.00  0.00           H  
ATOM    840  H22  DG A  26       6.140  -8.564  -1.300  2.00  0.00           H  
ATOM    841  H4'  DG A  26       1.610  -6.890  -4.940  5.00  0.00           H  
ATOM    842  H5'  DG A  26       4.169  -7.707  -3.500  8.00  0.00           H  
ATOM    843 H2''  DG A  26       1.542 -10.328  -2.620  8.00  0.00           H  
ATOM    844 H5''  DG A  26       4.060  -6.623  -4.870  6.00  0.00           H  
ATOM    845  P    DG A  27      -1.111  -9.302  -2.840  2.00  0.00           P  
ATOM    846  C5'  DG A  27      -1.061 -11.063  -4.750  5.00  0.00           C  
ATOM    847  O5'  DG A  27      -0.812 -10.767  -3.390  2.00  0.00           O  
ATOM    848  C4'  DG A  27      -0.796 -12.541  -5.040  7.00  0.00           C  
ATOM    849  O4'  DG A  27       0.591 -12.847  -4.840  9.00  0.00           O  
ATOM    850  C3'  DG A  27      -1.640 -13.472  -4.150  8.00  0.00           C  
ATOM    851  O3'  DG A  27      -2.109 -14.584  -4.920  9.00  0.00           O  
ATOM    852  C2'  DG A  27      -0.609 -13.833  -3.070  1.00  0.00           C  
ATOM    853  C1'  DG A  27       0.727 -13.840  -3.830  9.00  0.00           C  
ATOM    854  N1   DG A  27       5.715 -15.038  -3.300  9.00  0.00           N  
ATOM    855  C2   DG A  27       4.798 -15.424  -4.210  5.00  0.00           C  
ATOM    856  N2   DG A  27       5.230 -16.228  -5.140  2.00  0.00           N  
ATOM    857  N3   DG A  27       3.521 -15.076  -4.230  1.00  0.00           N  
ATOM    858  C4   DG A  27       3.200 -14.203  -3.230  6.00  0.00           C  
ATOM    859  C5   DG A  27       4.058 -13.738  -2.240  3.00  0.00           C  
ATOM    860  C6   DG A  27       5.440 -14.187  -2.250  5.00  0.00           C  
ATOM    861  O6   DG A  27       6.391 -13.952  -1.470  5.00  0.00           O  
ATOM    862  N7   DG A  27       3.363 -12.895  -1.380  4.00  0.00           N  
ATOM    863  C8   DG A  27       2.146 -12.851  -1.880  4.00  0.00           C  
ATOM    864  N9   DG A  27       1.961 -13.624  -3.000  7.00  0.00           N  
ATOM    865  OP1  DG A  27      -2.491  -8.997  -3.270  7.00  0.00           O  
ATOM    866  OP2  DG A  27      -0.779  -9.357  -1.400  1.00  0.00           O1-
ATOM    867  H1   DG A  27       6.636 -15.413  -3.390  6.00  0.00           H  
ATOM    868  H8   DG A  27       1.349 -12.246  -1.450  3.00  0.00           H  
ATOM    869  H1'  DG A  27       0.815 -14.802  -4.330  8.00  0.00           H  
ATOM    870  H2'  DG A  27      -0.610 -13.057  -2.310  0.00  0.00           H  
ATOM    871  H21  DG A  27       6.196 -16.521  -5.150  1.00  0.00           H  
ATOM    872  H3'  DG A  27      -2.479 -12.917  -3.720  6.00  0.00           H  
ATOM    873  H22  DG A  27       4.586 -16.409  -5.900  7.00  0.00           H  
ATOM    874  H4'  DG A  27      -1.064 -12.715  -6.080  5.00  0.00           H  
ATOM    875  H5'  DG A  27      -0.428 -10.435  -5.380  4.00  0.00           H  
ATOM    876 H2''  DG A  27      -0.830 -14.800  -2.630  2.00  0.00           H  
ATOM    877 H5''  DG A  27      -2.100 -10.826  -4.980  0.00  0.00           H  
ATOM    878  P    DT A  28      -3.445 -15.432  -4.560  9.00  0.00           P  
ATOM    879  C5'  DT A  28      -3.611 -17.725  -3.290  9.00  0.00           C  
ATOM    880  O5'  DT A  28      -2.832 -16.593  -3.640  0.00  0.00           O  
ATOM    881  C4'  DT A  28      -2.784 -18.968  -2.910  1.00  0.00           C  
ATOM    882  O4'  DT A  28      -1.797 -19.250  -3.910  4.00  0.00           O  
ATOM    883  C3'  DT A  28      -2.021 -18.852  -1.590  9.00  0.00           C  
ATOM    884  O3'  DT A  28      -1.833 -20.154  -1.020  2.00  0.00           O  
ATOM    885  C2'  DT A  28      -0.701 -18.254  -2.060  9.00  0.00           C  
ATOM    886  C1'  DT A  28      -0.503 -19.042  -3.350  7.00  0.00           C  
ATOM    887  N1   DT A  28       0.466 -18.414  -4.300  7.00  0.00           N  
ATOM    888  C2   DT A  28       1.762 -18.945  -4.330  7.00  0.00           C  
ATOM    889  O2   DT A  28       2.144 -19.890  -3.640  1.00  0.00           O  
ATOM    890  N3   DT A  28       2.648 -18.394  -5.210  7.00  0.00           N  
ATOM    891  C4   DT A  28       2.355 -17.431  -6.150  6.00  0.00           C  
ATOM    892  O4   DT A  28       3.226 -17.179  -6.980  7.00  0.00           O  
ATOM    893  C5   DT A  28       1.011 -16.857  -6.040  2.00  0.00           C  
ATOM    894  C6   DT A  28       0.122 -17.356  -5.130  5.00  0.00           C  
ATOM    895  C7   DT A  28       0.590 -15.718  -6.960  1.00  0.00           C  
ATOM    896  OP1  DT A  28      -3.939 -16.099  -5.790  6.00  0.00           O  
ATOM    897  OP2  DT A  28      -4.402 -14.656  -3.740  0.00  0.00           O1-
ATOM    898  H3   DT A  28       3.595 -18.718  -5.170  1.00  0.00           H  
ATOM    899  H6   DT A  28      -0.875 -16.929  -5.060  5.00  0.00           H  
ATOM    900  H1'  DT A  28      -0.123 -20.017  -3.050  8.00  0.00           H  
ATOM    901  H2'  DT A  28      -0.801 -17.188  -2.260  8.00  0.00           H  
ATOM    902  H3'  DT A  28      -2.525 -18.179  -0.890  9.00  0.00           H  
ATOM    903  H4'  DT A  28      -3.480 -19.801  -2.830  6.00  0.00           H  
ATOM    904  H5'  DT A  28      -4.238 -17.994  -4.140  5.00  0.00           H  
ATOM    905  H71  DT A  28      -0.489 -15.557  -6.920  6.00  0.00           H  
ATOM    906  H72  DT A  28       1.097 -14.800  -6.660  1.00  0.00           H  
ATOM    907  H73  DT A  28       0.888 -15.937  -7.980  2.00  0.00           H  
ATOM    908 H2''  DT A  28       0.101 -18.438  -1.350  6.00  0.00           H  
ATOM    909 H5''  DT A  28      -4.262 -17.454  -2.460  5.00  0.00           H  
ATOM    910  P    DT A  29      -2.710 -20.632   0.230  1.00  0.00           P  
ATOM    911  C5'  DT A  29      -2.472 -19.752   2.700  9.00  0.00           C  
ATOM    912  O5'  DT A  29      -2.024 -19.737   1.360  3.00  0.00           O  
ATOM    913  C4'  DT A  29      -1.632 -18.839   3.610  3.00  0.00           C  
ATOM    914  O4'  DT A  29      -0.267 -19.257   3.710  1.00  0.00           O  
ATOM    915  C3'  DT A  29      -1.596 -17.378   3.170  8.00  0.00           C  
ATOM    916  O3'  DT A  29      -1.468 -16.659   4.390  0.00  0.00           O  
ATOM    917  C2'  DT A  29      -0.331 -17.320   2.330  6.00  0.00           C  
ATOM    918  C1'  DT A  29       0.569 -18.236   3.160  7.00  0.00           C  
ATOM    919  N1   DT A  29       1.667 -18.877   2.380  7.00  0.00           N  
ATOM    920  C2   DT A  29       2.966 -18.813   2.900  5.00  0.00           C  
ATOM    921  O2   DT A  29       3.254 -18.424   4.040  9.00  0.00           O  
ATOM    922  N3   DT A  29       3.962 -19.362   2.130  6.00  0.00           N  
ATOM    923  C4   DT A  29       3.765 -20.228   1.090  7.00  0.00           C  
ATOM    924  O4   DT A  29       4.740 -20.854   0.680  7.00  0.00           O  
ATOM    925  C5   DT A  29       2.376 -20.347   0.640  2.00  0.00           C  
ATOM    926  C6   DT A  29       1.390 -19.659   1.280  8.00  0.00           C  
ATOM    927  C7   DT A  29       2.014 -21.257  -0.510  1.00  0.00           C  
ATOM    928  OP1  DT A  29      -2.418 -22.045   0.560  9.00  0.00           O  
ATOM    929  OP2  DT A  29      -4.113 -20.203   0.050  6.00  0.00           O1-
ATOM    930  H3   DT A  29       4.906 -19.197   2.420  5.00  0.00           H  
ATOM    931  H6   DT A  29       0.360 -19.762   0.950  5.00  0.00           H  
ATOM    932  H1'  DT A  29       0.973 -17.615   3.960  4.00  0.00           H  
ATOM    933  H2'  DT A  29      -0.520 -17.707   1.330  6.00  0.00           H  
ATOM    934  H3'  DT A  29      -2.488 -17.094   2.610  7.00  0.00           H  
ATOM    935  H4'  DT A  29      -2.081 -18.871   4.600  9.00  0.00           H  
ATOM    936  H5'  DT A  29      -2.432 -20.768   3.100  8.00  0.00           H  
ATOM    937  H71  DT A  29       2.204 -22.294  -0.240  4.00  0.00           H  
ATOM    938  H72  DT A  29       0.964 -21.143  -0.790  4.00  0.00           H  
ATOM    939  H73  DT A  29       2.641 -21.012  -1.370  0.00  0.00           H  
ATOM    940 H2''  DT A  29       0.068 -16.309   2.270  8.00  0.00           H  
ATOM    941 H5''  DT A  29      -3.508 -19.410   2.730  4.00  0.00           H  
ATOM    942  P    DA A  30      -1.855 -15.122   4.510  7.00  0.00           P  
ATOM    943  C5'  DA A  30       0.665 -14.351   4.710  5.00  0.00           C  
ATOM    944  O5'  DA A  30      -0.511 -14.459   3.910  7.00  0.00           O  
ATOM    945  C4'  DA A  30       1.947 -14.004   3.930  2.00  0.00           C  
ATOM    946  O4'  DA A  30       2.402 -15.051   3.060  6.00  0.00           O  
ATOM    947  C3'  DA A  30       1.837 -12.718   3.100  3.00  0.00           C  
ATOM    948  O3'  DA A  30       2.793 -11.765   3.550  6.00  0.00           O  
ATOM    949  C2'  DA A  30       2.127 -13.210   1.690  2.00  0.00           C  
ATOM    950  C1'  DA A  30       3.003 -14.443   1.930  5.00  0.00           C  
ATOM    951  N1   DA A  30       5.913 -17.909  -0.620  9.00  0.00           N  
ATOM    952  C2   DA A  30       6.200 -17.059   0.330  0.00  0.00           C  
ATOM    953  N3   DA A  30       5.427 -16.146   0.900  9.00  0.00           N  
ATOM    954  C4   DA A  30       4.147 -16.177   0.400  0.00  0.00           C  
ATOM    955  C5   DA A  30       3.688 -17.018  -0.580  9.00  0.00           C  
ATOM    956  C6   DA A  30       4.667 -17.903  -1.100  2.00  0.00           C  
ATOM    957  N6   DA A  30       4.465 -18.826  -2.020  9.00  0.00           N  
ATOM    958  N7   DA A  30       2.326 -16.812  -0.820  6.00  0.00           N  
ATOM    959  C8   DA A  30       2.016 -15.850   0.000  2.00  0.00           C  
ATOM    960  N9   DA A  30       3.054 -15.424   0.800  2.00  0.00           N  
ATOM    961  OP1  DA A  30      -2.001 -14.912   5.960  8.00  0.00           O  
ATOM    962  OP2  DA A  30      -3.021 -14.929   3.630  7.00  0.00           O1-
ATOM    963  H2   DA A  30       7.218 -17.098   0.690  0.00  0.00           H  
ATOM    964  H8   DA A  30       1.016 -15.438   0.080  2.00  0.00           H  
ATOM    965  H1'  DA A  30       4.008 -14.093   2.170  0.00  0.00           H  
ATOM    966  H2'  DA A  30       1.187 -13.479   1.200  8.00  0.00           H  
ATOM    967  H3'  DA A  30       0.830 -12.293   3.140  9.00  0.00           H  
ATOM    968  H4'  DA A  30       2.728 -13.829   4.670  6.00  0.00           H  
ATOM    969  H5'  DA A  30       0.833 -15.288   5.230  8.00  0.00           H  
ATOM    970  H61  DA A  30       5.234 -19.426  -2.280  1.00  0.00           H  
ATOM    971  H62  DA A  30       3.534 -18.959  -2.390  4.00  0.00           H  
ATOM    972 H2''  DA A  30       2.645 -12.441   1.110  3.00  0.00           H  
ATOM    973 H5''  DA A  30       0.498 -13.567   5.450  8.00  0.00           H  
ATOM    974  P    DG A  31       2.420 -10.787   4.790  5.00  0.00           P  
ATOM    975  C5'  DG A  31       4.280  -8.904   4.310  7.00  0.00           C  
ATOM    976  O5'  DG A  31       3.750  -9.943   5.130  9.00  0.00           O  
ATOM    977  C4'  DG A  31       5.458  -8.257   5.060  1.00  0.00           C  
ATOM    978  O4'  DG A  31       6.527  -9.191   5.300  7.00  0.00           O  
ATOM    979  C3'  DG A  31       6.116  -7.055   4.380  9.00  0.00           C  
ATOM    980  O3'  DG A  31       6.669  -6.263   5.430  9.00  0.00           O  
ATOM    981  C2'  DG A  31       7.205  -7.729   3.570  2.00  0.00           C  
ATOM    982  C1'  DG A  31       7.690  -8.758   4.590  6.00  0.00           C  
ATOM    983  N1   DG A  31       7.650 -12.472   1.050  5.00  0.00           N  
ATOM    984  C2   DG A  31       6.755 -11.501   1.320  5.00  0.00           C  
ATOM    985  N2   DG A  31       5.719 -11.404   0.540  8.00  0.00           N  
ATOM    986  N3   DG A  31       6.888 -10.619   2.280  9.00  0.00           N  
ATOM    987  C4   DG A  31       8.033 -10.740   3.010  0.00  0.00           C  
ATOM    988  C5   DG A  31       9.003 -11.704   2.850  0.00  0.00           C  
ATOM    989  C6   DG A  31       8.808 -12.669   1.790  2.00  0.00           C  
ATOM    990  O6   DG A  31       9.515 -13.624   1.430  5.00  0.00           O  
ATOM    991  N7   DG A  31      10.036 -11.519   3.780  6.00  0.00           N  
ATOM    992  C8   DG A  31       9.655 -10.439   4.430  7.00  0.00           C  
ATOM    993  N9   DG A  31       8.453  -9.906   4.020  3.00  0.00           N  
ATOM    994  OP1  DG A  31       2.182 -11.651   5.970  0.00  0.00           O  
ATOM    995  OP2  DG A  31       1.335  -9.882   4.370  7.00  0.00           O1-
ATOM    996  H1   DG A  31       7.441 -12.992   0.230  3.00  0.00           H  
ATOM    997  H8   DG A  31      10.235  -9.983   5.220  1.00  0.00           H  
ATOM    998  H1'  DG A  31       8.325  -8.203   5.290  3.00  0.00           H  
ATOM    999  H2'  DG A  31       6.777  -8.174   2.680  5.00  0.00           H  
ATOM   1000  H21  DG A  31       5.521 -12.000  -0.230  4.00  0.00           H  
ATOM   1001  H3'  DG A  31       5.416  -6.491   3.760  4.00  0.00           H  
ATOM   1002  H22  DG A  31       5.108 -10.624   0.740  1.00  0.00           H  
ATOM   1003  H4'  DG A  31       5.057  -7.905   6.010  7.00  0.00           H  
ATOM   1004  H5'  DG A  31       3.516  -8.144   4.120  5.00  0.00           H  
ATOM   1005 H2''  DG A  31       7.991  -7.029   3.300  4.00  0.00           H  
ATOM   1006 H5''  DG A  31       4.620  -9.302   3.350  8.00  0.00           H  
ATOM   1007  P    DG A  32       7.135  -4.752   5.190  5.00  0.00           P  
ATOM   1008  C5'  DG A  32       9.677  -5.238   5.570  2.00  0.00           C  
ATOM   1009  O5'  DG A  32       8.635  -4.990   4.650  8.00  0.00           O  
ATOM   1010  C4'  DG A  32      11.015  -5.710   4.980  6.00  0.00           C  
ATOM   1011  O4'  DG A  32      10.874  -6.905   4.200  5.00  0.00           O  
ATOM   1012  C3'  DG A  32      11.804  -4.722   4.120  1.00  0.00           C  
ATOM   1013  O3'  DG A  32      13.165  -5.072   4.370  4.00  0.00           O  
ATOM   1014  C2'  DG A  32      11.381  -5.133   2.720  5.00  0.00           C  
ATOM   1015  C1'  DG A  32      11.382  -6.658   2.880  1.00  0.00           C  
ATOM   1016  N1   DG A  32      11.342 -11.028   0.180  6.00  0.00           N  
ATOM   1017  C2   DG A  32      12.201 -10.571   1.120  5.00  0.00           C  
ATOM   1018  N2   DG A  32      13.268 -11.293   1.310  1.00  0.00           N  
ATOM   1019  N3   DG A  32      12.104  -9.418   1.760  3.00  0.00           N  
ATOM   1020  C4   DG A  32      10.995  -8.698   1.390  9.00  0.00           C  
ATOM   1021  C5   DG A  32      10.042  -9.081   0.470  8.00  0.00           C  
ATOM   1022  C6   DG A  32      10.217 -10.346  -0.210  1.00  0.00           C  
ATOM   1023  O6   DG A  32       9.567 -10.903  -1.120  5.00  0.00           O  
ATOM   1024  N7   DG A  32       9.075  -8.088   0.340  4.00  0.00           N  
ATOM   1025  C8   DG A  32       9.498  -7.129   1.140  8.00  0.00           C  
ATOM   1026  N9   DG A  32      10.639  -7.441   1.850  8.00  0.00           N  
ATOM   1027  OP1  DG A  32       7.179  -4.159   6.560  5.00  0.00           O  
ATOM   1028  OP2  DG A  32       6.292  -4.185   4.140  8.00  0.00           O1-
ATOM   1029  H1   DG A  32      11.568 -11.903  -0.240  4.00  0.00           H  
ATOM   1030  H8   DG A  32       8.986  -6.176   1.260  0.00  0.00           H  
ATOM   1031  H1'  DG A  32      12.433  -6.960   2.850  9.00  0.00           H  
ATOM   1032  H2'  DG A  32      10.388  -4.743   2.490  2.00  0.00           H  
ATOM   1033  H21  DG A  32      13.467 -12.095   0.730  4.00  0.00           H  
ATOM   1034  H3'  DG A  32      11.566  -3.676   4.350  9.00  0.00           H  
ATOM   1035  H22  DG A  32      13.964 -10.893   1.910  5.00  0.00           H  
ATOM   1036  H4'  DG A  32      11.640  -5.922   5.850  6.00  0.00           H  
ATOM   1037  H5'  DG A  32       9.335  -6.007   6.260  6.00  0.00           H  
ATOM   1038 H2''  DG A  32      12.111  -4.793   1.980  3.00  0.00           H  
ATOM   1039 H5''  DG A  32       9.848  -4.320   6.130  9.00  0.00           H  
ATOM   1040  P    DG A  33      14.321  -3.996   4.640  2.00  0.00           P  
ATOM   1041  C5'  DG A  33      15.319  -4.344   2.180  0.00  0.00           C  
ATOM   1042  O5'  DG A  33      14.698  -3.503   3.160  0.00  0.00           O  
ATOM   1043  C4'  DG A  33      16.856  -4.416   2.320  1.00  0.00           C  
ATOM   1044  O4'  DG A  33      17.312  -5.784   2.260  4.00  0.00           O  
ATOM   1045  C3'  DG A  33      17.677  -3.721   1.220  8.00  0.00           C  
ATOM   1046  O3'  DG A  33      17.229  -2.456   0.760  3.00  0.00           O  
ATOM   1047  C2'  DG A  33      17.636  -4.772   0.120  8.00  0.00           C  
ATOM   1048  C1'  DG A  33      17.838  -6.047   0.950  0.00  0.00           C  
ATOM   1049  N1   DG A  33      13.704  -8.326  -1.100  3.00  0.00           N  
ATOM   1050  C2   DG A  33      13.870  -7.071  -0.610  3.00  0.00           C  
ATOM   1051  N2   DG A  33      12.903  -6.209  -0.720  8.00  0.00           N  
ATOM   1052  N3   DG A  33      14.988  -6.631  -0.070  7.00  0.00           N  
ATOM   1053  C4   DG A  33      16.008  -7.526  -0.070  2.00  0.00           C  
ATOM   1054  C5   DG A  33      15.954  -8.820  -0.520  9.00  0.00           C  
ATOM   1055  C6   DG A  33      14.716  -9.283  -1.090  2.00  0.00           C  
ATOM   1056  O6   DG A  33      14.472 -10.392  -1.590  5.00  0.00           O  
ATOM   1057  N7   DG A  33      17.185  -9.460  -0.340  7.00  0.00           N  
ATOM   1058  C8   DG A  33      17.926  -8.523   0.190  6.00  0.00           C  
ATOM   1059  N9   DG A  33      17.296  -7.307   0.360  4.00  0.00           N  
ATOM   1060  OP1  DG A  33      15.405  -4.821   5.250  5.00  0.00           O  
ATOM   1061  OP2  DG A  33      13.717  -2.921   5.460  5.00  0.00           O1-
ATOM   1062  H1   DG A  33      12.810  -8.503  -1.510  5.00  0.00           H  
ATOM   1063  H8   DG A  33      18.960  -8.686   0.470  5.00  0.00           H  
ATOM   1064  H1'  DG A  33      18.914  -6.165   1.050  5.00  0.00           H  
ATOM   1065  H2'  DG A  33      16.681  -4.741  -0.390  5.00  0.00           H  
ATOM   1066  H21  DG A  33      12.021  -6.355  -1.200  6.00  0.00           H  
ATOM   1067  H3'  DG A  33      18.707  -3.641   1.560  7.00  0.00           H  
ATOM   1068  H22  DG A  33      13.144  -5.258  -0.470  4.00  0.00           H  
ATOM   1069  H4'  DG A  33      17.114  -3.960   3.270  1.00  0.00           H  
ATOM   1070  H5'  DG A  33      15.085  -3.960   1.180  9.00  0.00           H  
ATOM   1071 H2''  DG A  33      18.449  -4.615  -0.580  9.00  0.00           H  
ATOM   1072 H5''  DG A  33      14.898  -5.345   2.250  6.00  0.00           H  
ATOM   1073  P    DT A  34      17.854  -1.080   1.350  0.00  0.00           P  
ATOM   1074  C5'  DT A  34      15.797   0.043   2.620  0.00  0.00           C  
ATOM   1075  O5'  DT A  34      16.950  -0.804   2.670  0.00  0.00           O  
ATOM   1076  C4'  DT A  34      16.175   1.528   2.810  0.00  0.00           C  
ATOM   1077  O4'  DT A  34      15.025   2.341   2.570  1.00  0.00           O  
ATOM   1078  C3'  DT A  34      16.716   1.863   4.220  3.00  0.00           C  
ATOM   1079  O3'  DT A  34      17.934   2.622   4.170  8.00  0.00           O  
ATOM   1080  C2'  DT A  34      15.526   2.638   4.800  5.00  0.00           C  
ATOM   1081  C1'  DT A  34      14.904   3.321   3.580  0.00  0.00           C  
ATOM   1082  N1   DT A  34      13.467   3.710   3.760  6.00  0.00           N  
ATOM   1083  C2   DT A  34      13.159   5.061   3.970  3.00  0.00           C  
ATOM   1084  O2   DT A  34      13.994   5.961   3.990  9.00  0.00           O  
ATOM   1085  N3   DT A  34      11.835   5.376   4.170  6.00  0.00           N  
ATOM   1086  C4   DT A  34      10.782   4.491   4.190  0.00  0.00           C  
ATOM   1087  O4   DT A  34       9.656   4.931   4.420  2.00  0.00           O  
ATOM   1088  C5   DT A  34      11.154   3.103   3.910  7.00  0.00           C  
ATOM   1089  C6   DT A  34      12.457   2.766   3.690  5.00  0.00           C  
ATOM   1090  C7   DT A  34      10.090   2.022   3.810  0.00  0.00           C  
ATOM   1091  OP1  DT A  34      17.644   0.033   0.410  0.00  0.00           O  
ATOM   1092  OP2  DT A  34      19.239  -1.388   1.800  1.00  0.00           O1-
ATOM   1093  H3   DT A  34      11.623   6.351   4.320  6.00  0.00           H  
ATOM   1094  H6   DT A  34      12.710   1.747   3.420  9.00  0.00           H  
ATOM   1095  H1'  DT A  34      15.506   4.193   3.310  2.00  0.00           H  
ATOM   1096  H2'  DT A  34      14.810   1.939   5.240  6.00  0.00           H  
ATOM   1097  H3'  DT A  34      16.886   0.936   4.770  8.00  0.00           H  
ATOM   1098  H4'  DT A  34      16.932   1.778   2.060  7.00  0.00           H  
ATOM   1099  H5'  DT A  34      15.110  -0.249   3.420  0.00  0.00           H  
ATOM   1100  H71  DT A  34       9.880   1.612   4.800  2.00  0.00           H  
ATOM   1101  H72  DT A  34       9.169   2.447   3.410  4.00  0.00           H  
ATOM   1102  H73  DT A  34      10.420   1.228   3.140  3.00  0.00           H  
ATOM   1103 H2''  DT A  34      15.849   3.371   5.540  1.00  0.00           H  
ATOM   1104 H5''  DT A  34      15.273  -0.082   1.670  5.00  0.00           H  
ATOM   1105  P    DT A  35      18.972   2.764   5.420  1.00  0.00           P  
ATOM   1106  C5'  DT A  35      18.895   5.416   5.460  2.00  0.00           C  
ATOM   1107  O5'  DT A  35      18.526   4.165   6.050  9.00  0.00           O  
ATOM   1108  C4'  DT A  35      18.441   6.581   6.360  0.00  0.00           C  
ATOM   1109  O4'  DT A  35      17.031   6.709   6.220  0.00  0.00           O  
ATOM   1110  C3'  DT A  35      18.780   6.333   7.850  2.00  0.00           C  
ATOM   1111  O3'  DT A  35      19.594   7.324   8.470  5.00  0.00           O  
ATOM   1112  C2'  DT A  35      17.380   6.172   8.440  4.00  0.00           C  
ATOM   1113  C1'  DT A  35      16.457   6.942   7.480  9.00  0.00           C  
ATOM   1114  N1   DT A  35      15.023   6.507   7.460  0.00  0.00           N  
ATOM   1115  C2   DT A  35      14.051   7.485   7.190  6.00  0.00           C  
ATOM   1116  O2   DT A  35      14.313   8.665   6.980  5.00  0.00           O  
ATOM   1117  N3   DT A  35      12.738   7.074   7.190  0.00  0.00           N  
ATOM   1118  C4   DT A  35      12.289   5.794   7.410  1.00  0.00           C  
ATOM   1119  O4   DT A  35      11.080   5.581   7.440  0.00  0.00           O  
ATOM   1120  C5   DT A  35      13.348   4.801   7.590  7.00  0.00           C  
ATOM   1121  C6   DT A  35      14.653   5.180   7.600  6.00  0.00           C  
ATOM   1122  C7   DT A  35      13.008   3.328   7.760  9.00  0.00           C  
ATOM   1123  OP1  DT A  35      20.367   2.934   4.930  3.00  0.00           O  
ATOM   1124  OP2  DT A  35      18.715   1.751   6.480  7.00  0.00           O1-
ATOM   1125  H3   DT A  35      12.041   7.796   7.060  5.00  0.00           H  
ATOM   1126  H6   DT A  35      15.412   4.423   7.690  0.00  0.00           H  
ATOM   1127  H1'  DT A  35      16.516   8.012   7.710  2.00  0.00           H  
ATOM   1128  H2'  DT A  35      17.171   5.107   8.430  9.00  0.00           H  
ATOM   1129  H3'  DT A  35      19.311   5.386   7.940  9.00  0.00           H  
ATOM   1130  H4'  DT A  35      18.910   7.510   6.030  4.00  0.00           H  
ATOM   1131  H5'  DT A  35      18.436   5.515   4.480  7.00  0.00           H  
ATOM   1132  H71  DT A  35      13.896   2.744   8.000  4.00  0.00           H  
ATOM   1133  H72  DT A  35      12.270   3.216   8.550  3.00  0.00           H  
ATOM   1134  H73  DT A  35      12.572   2.952   6.830  6.00  0.00           H  
ATOM   1135 H2''  DT A  35      17.303   6.557   9.450  6.00  0.00           H  
ATOM   1136 H5''  DT A  35      19.977   5.467   5.350  7.00  0.00           H  
ATOM   1137  P    DA A  36      20.114   7.158  10.000  3.00  0.00           P  
ATOM   1138  C5'  DA A  36      18.594   9.275  10.540  8.00  0.00           C  
ATOM   1139  O5'  DA A  36      18.954   7.920  10.830  8.00  0.00           O  
ATOM   1140  C4'  DA A  36      17.251   9.683  11.170  1.00  0.00           C  
ATOM   1141  O4'  DA A  36      16.199   8.861  10.650  3.00  0.00           O  
ATOM   1142  C3'  DA A  36      17.240   9.529  12.700  6.00  0.00           C  
ATOM   1143  O3'  DA A  36      16.612  10.621  13.340  6.00  0.00           O  
ATOM   1144  C2'  DA A  36      16.322   8.324  12.860  6.00  0.00           C  
ATOM   1145  C1'  DA A  36      15.327   8.577  11.730  7.00  0.00           C  
ATOM   1146  N1   DA A  36      10.473   7.202  10.850  2.00  0.00           N  
ATOM   1147  C2   DA A  36      11.076   8.384  10.810  0.00  0.00           C  
ATOM   1148  N3   DA A  36      12.368   8.630  10.990  4.00  0.00           N  
ATOM   1149  C4   DA A  36      13.085   7.499  11.220  3.00  0.00           C  
ATOM   1150  C5   DA A  36      12.617   6.212  11.270  4.00  0.00           C  
ATOM   1151  C6   DA A  36      11.214   6.127  11.080  6.00  0.00           C  
ATOM   1152  N6   DA A  36      10.503   5.014  11.070  7.00  0.00           N  
ATOM   1153  N7   DA A  36      13.664   5.289  11.510  5.00  0.00           N  
ATOM   1154  C8   DA A  36      14.706   6.081  11.580  0.00  0.00           C  
ATOM   1155  N9   DA A  36      14.434   7.422  11.470  2.00  0.00           N  
ATOM   1156  OP1  DA A  36      21.401   7.864  10.200  6.00  0.00           O  
ATOM   1157  OP2  DA A  36      20.067   5.718  10.370  2.00  0.00           O1-
ATOM   1158  H2   DA A  36      10.446   9.245  10.630  8.00  0.00           H  
ATOM   1159  H8   DA A  36      15.712   5.724  11.740  9.00  0.00           H  
ATOM   1160  H1'  DA A  36      14.713   9.459  11.950  0.00  0.00           H  
ATOM   1161  H2'  DA A  36      16.890   7.412  12.680  7.00  0.00           H  
ATOM   1162  H3'  DA A  36      18.237   9.336  13.090  1.00  0.00           H  
ATOM   1163  H4'  DA A  36      17.042  10.728  10.930  2.00  0.00           H  
ATOM   1164  H5'  DA A  36      18.500   9.411   9.460  5.00  0.00           H  
ATOM   1165  H61  DA A  36       9.515   5.114  10.870  6.00  0.00           H  
ATOM   1166  H62  DA A  36      10.979   4.140  11.090  7.00  0.00           H  
ATOM   1167 H2''  DA A  36      15.831   8.316  13.830  1.00  0.00           H  
ATOM   1168 H5''  DA A  36      19.374   9.950  10.890  2.00  0.00           H  
ATOM   1169  P    DG A  37      17.394  11.660  14.280  3.00  0.00           P  
ATOM   1170  C5'  DG A  37      15.839  13.660  13.460  9.00  0.00           C  
ATOM   1171  O5'  DG A  37      16.246  12.774  14.510  0.00  0.00           O  
ATOM   1172  C4'  DG A  37      14.550  14.482  13.730  9.00  0.00           C  
ATOM   1173  O4'  DG A  37      13.418  13.825  13.170  1.00  0.00           O  
ATOM   1174  C3'  DG A  37      14.219  14.763  15.200  6.00  0.00           C  
ATOM   1175  O3'  DG A  37      13.502  15.986  15.380  4.00  0.00           O  
ATOM   1176  C2'  DG A  37      13.372  13.530  15.500  1.00  0.00           C  
ATOM   1177  C1'  DG A  37      12.609  13.276  14.200  5.00  0.00           C  
ATOM   1178  N1   DG A  37       9.261   9.392  14.100  7.00  0.00           N  
ATOM   1179  C2   DG A  37       9.030  10.726  14.000  0.00  0.00           C  
ATOM   1180  N2   DG A  37       7.790  11.126  13.990  3.00  0.00           N  
ATOM   1181  N3   DG A  37       9.985  11.653  13.980  6.00  0.00           N  
ATOM   1182  C4   DG A  37      11.241  11.123  13.990  3.00  0.00           C  
ATOM   1183  C5   DG A  37      11.583   9.788  14.050  1.00  0.00           C  
ATOM   1184  C6   DG A  37      10.521   8.821  14.120  2.00  0.00           C  
ATOM   1185  O6   DG A  37      10.611   7.592  14.210  2.00  0.00           O  
ATOM   1186  N7   DG A  37      12.979   9.630  14.060  9.00  0.00           N  
ATOM   1187  C8   DG A  37      13.403  10.861  13.960  9.00  0.00           C  
ATOM   1188  N9   DG A  37      12.426  11.819  13.990  7.00  0.00           N  
ATOM   1189  OP1  DG A  37      18.519  12.251  13.530  0.00  0.00           O  
ATOM   1190  OP2  DG A  37      17.688  10.992  15.560  3.00  0.00           O1-
ATOM   1191  H1   DG A  37       8.460   8.777  14.120  1.00  0.00           H  
ATOM   1192  H8   DG A  37      14.442  11.134  13.910  5.00  0.00           H  
ATOM   1193  H1'  DG A  37      11.635  13.778  14.220  6.00  0.00           H  
ATOM   1194  H2'  DG A  37      14.030  12.696  15.740  0.00  0.00           H  
ATOM   1195  H21  DG A  37       7.029  10.453  14.060  1.00  0.00           H  
ATOM   1196  H3'  DG A  37      15.129  14.772  15.800  0.00  0.00           H  
ATOM   1197  H22  DG A  37       7.626  12.103  13.830  8.00  0.00           H  
ATOM   1198  H4'  DG A  37      14.661  15.438  13.210  2.00  0.00           H  
ATOM   1199  H5'  DG A  37      15.668  13.077  12.550  5.00  0.00           H  
ATOM   1200 H2''  DG A  37      12.689  13.691  16.320  4.00  0.00           H  
ATOM   1201 H5''  DG A  37      16.656  14.349  13.240  2.00  0.00           H  
ATOM   1202  P    DG A  38      13.005  16.494  16.830  0.00  0.00           P  
ATOM   1203  C5'  DG A  38      10.424  16.011  16.300  0.00  0.00           C  
ATOM   1204  O5'  DG A  38      11.595  15.741  17.080  4.00  0.00           O  
ATOM   1205  C4'  DG A  38       9.242  15.097  16.690  6.00  0.00           C  
ATOM   1206  O4'  DG A  38       9.535  13.731  16.390  3.00  0.00           O  
ATOM   1207  C3'  DG A  38       8.913  15.163  18.190  6.00  0.00           C  
ATOM   1208  O3'  DG A  38       7.512  15.282  18.410  7.00  0.00           O  
ATOM   1209  C2'  DG A  38       9.482  13.825  18.670  9.00  0.00           C  
ATOM   1210  C1'  DG A  38       9.119  12.928  17.490  1.00  0.00           C  
ATOM   1211  N1   DG A  38       8.463   7.831  17.470  3.00  0.00           N  
ATOM   1212  C2   DG A  38       7.557   8.844  17.490  4.00  0.00           C  
ATOM   1213  N2   DG A  38       6.298   8.537  17.620  7.00  0.00           N  
ATOM   1214  N3   DG A  38       7.865  10.133  17.530  4.00  0.00           N  
ATOM   1215  C4   DG A  38       9.205  10.369  17.530  4.00  0.00           C  
ATOM   1216  C5   DG A  38      10.216   9.427  17.550  9.00  0.00           C  
ATOM   1217  C6   DG A  38       9.834   8.028  17.510  2.00  0.00           C  
ATOM   1218  O6   DG A  38      10.555   7.021  17.530  3.00  0.00           O  
ATOM   1219  N7   DG A  38      11.474  10.070  17.640  5.00  0.00           N  
ATOM   1220  C8   DG A  38      11.149  11.340  17.550  0.00  0.00           C  
ATOM   1221  N9   DG A  38       9.806  11.606  17.500  8.00  0.00           N  
ATOM   1222  OP1  DG A  38      12.767  17.955  16.770  7.00  0.00           O  
ATOM   1223  OP2  DG A  38      13.963  15.973  17.840  8.00  0.00           O1-
ATOM   1224  H1   DG A  38       8.113   6.892  17.370  2.00  0.00           H  
ATOM   1225  H8   DG A  38      11.859  12.149  17.520  0.00  0.00           H  
ATOM   1226  H1'  DG A  38       8.032  12.779  17.460  3.00  0.00           H  
ATOM   1227  H2'  DG A  38      10.564  13.911  18.770  7.00  0.00           H  
ATOM   1228  H21  DG A  38       5.977   7.575  17.660  1.00  0.00           H  
ATOM   1229  H3'  DG A  38       9.425  16.003  18.660  3.00  0.00           H  
ATOM   1230  H22  DG A  38       5.664   9.317  17.660  1.00  0.00           H  
ATOM   1231  H4'  DG A  38       8.357  15.401  16.130  2.00  0.00           H  
ATOM   1232  H5'  DG A  38      10.630  15.875  15.240  2.00  0.00           H  
ATOM   1233 H2''  DG A  38       9.028  13.486  19.600  0.00  0.00           H  
ATOM   1234 H5''  DG A  38      10.127  17.049  16.460  1.00  0.00           H  
ATOM   1235  P    DG A  39       6.868  15.434  19.880  1.00  0.00           P  
ATOM   1236  C5'  DG A  39       5.041  13.570  19.380  8.00  0.00           C  
ATOM   1237  O5'  DG A  39       6.188  13.993  20.130  6.00  0.00           O  
ATOM   1238  C4'  DG A  39       4.406  12.268  19.910  0.00  0.00           C  
ATOM   1239  O4'  DG A  39       5.287  11.173  19.660  3.00  0.00           O  
ATOM   1240  C3'  DG A  39       4.110  12.302  21.430  3.00  0.00           C  
ATOM   1241  O3'  DG A  39       2.859  11.702  21.770  7.00  0.00           O  
ATOM   1242  C2'  DG A  39       5.296  11.507  21.960  5.00  0.00           C  
ATOM   1243  C1'  DG A  39       5.494  10.465  20.870  0.00  0.00           C  
ATOM   1244  N1   DG A  39       8.036   6.046  21.000  6.00  0.00           N  
ATOM   1245  C2   DG A  39       6.707   6.307  20.950  7.00  0.00           C  
ATOM   1246  N2   DG A  39       5.879   5.304  20.970  8.00  0.00           N  
ATOM   1247  N3   DG A  39       6.175   7.515  20.950  0.00  0.00           N  
ATOM   1248  C4   DG A  39       7.107   8.508  20.960  6.00  0.00           C  
ATOM   1249  C5   DG A  39       8.479   8.369  21.000  2.00  0.00           C  
ATOM   1250  C6   DG A  39       9.014   7.026  21.000  0.00  0.00           C  
ATOM   1251  O6   DG A  39      10.192   6.646  20.990  9.00  0.00           O  
ATOM   1252  N7   DG A  39       9.100   9.632  21.040  1.00  0.00           N  
ATOM   1253  C8   DG A  39       8.079  10.459  20.980  8.00  0.00           C  
ATOM   1254  N9   DG A  39       6.846   9.853  20.920  6.00  0.00           N  
ATOM   1255  OP1  DG A  39       5.811  16.464  19.820  7.00  0.00           O  
ATOM   1256  OP2  DG A  39       7.983  15.590  20.860  1.00  0.00           O1-
ATOM   1257  H1   DG A  39       8.311   5.081  20.980  8.00  0.00           H  
ATOM   1258  H8   DG A  39       8.171  11.538  20.970  9.00  0.00           H  
ATOM   1259  H1'  DG A  39       4.727   9.690  20.960  0.00  0.00           H  
ATOM   1260  H2'  DG A  39       6.159  12.164  22.040  0.00  0.00           H  
ATOM   1261  H21  DG A  39       6.186   4.345  21.090  6.00  0.00           H  
ATOM   1262  H3'  DG A  39       4.133  13.329  21.800  6.00  0.00           H  
ATOM   1263  H22  DG A  39       4.908   5.554  20.930  0.00  0.00           H  
ATOM   1264  H4'  DG A  39       3.469  12.099  19.380  7.00  0.00           H  
ATOM   1265  H5'  DG A  39       5.321  13.417  18.330  5.00  0.00           H  
ATOM   1266 H2''  DG A  39       5.086  11.036  22.920  3.00  0.00           H  
ATOM   1267 H5''  DG A  39       4.279  14.352  19.400  6.00  0.00           H  
ATOM   1268  P    DT A  40       2.317  11.574  23.290  2.00  0.00           P  
ATOM   1269  C5'  DT A  40       1.868   9.012  22.980  9.00  0.00           C  
ATOM   1270  O5'  DT A  40       2.610  10.029  23.630  5.00  0.00           O  
ATOM   1271  C4'  DT A  40       2.127   7.593  23.490  9.00  0.00           C  
ATOM   1272  O4'  DT A  40       3.503   7.254  23.360  5.00  0.00           O  
ATOM   1273  C3'  DT A  40       1.725   7.374  24.960  9.00  0.00           C  
ATOM   1274  O3'  DT A  40       1.056   6.113  25.040  7.00  0.00           O  
ATOM   1275  C2'  DT A  40       3.096   7.428  25.640  2.00  0.00           C  
ATOM   1276  C1'  DT A  40       3.975   6.751  24.590  4.00  0.00           C  
ATOM   1277  N1   DT A  40       5.444   7.006  24.670  6.00  0.00           N  
ATOM   1278  C2   DT A  40       6.296   5.904  24.500  6.00  0.00           C  
ATOM   1279  O2   DT A  40       5.934   4.735  24.420  0.00  0.00           O  
ATOM   1280  N3   DT A  40       7.640   6.160  24.440  1.00  0.00           N  
ATOM   1281  C4   DT A  40       8.231   7.396  24.500  6.00  0.00           C  
ATOM   1282  O4   DT A  40       9.453   7.461  24.390  2.00  0.00           O  
ATOM   1283  C5   DT A  40       7.304   8.514  24.660  6.00  0.00           C  
ATOM   1284  C6   DT A  40       5.959   8.292  24.730  6.00  0.00           C  
ATOM   1285  C7   DT A  40       7.852   9.932  24.690  5.00  0.00           C  
ATOM   1286  OP1  DT A  40       0.853  11.767  23.300  5.00  0.00           O  
ATOM   1287  OP2  DT A  40       3.161  12.380  24.210  3.00  0.00           O1-
ATOM   1288  H3   DT A  40       8.228   5.357  24.280  7.00  0.00           H  
ATOM   1289  H6   DT A  40       5.270   9.129  24.780  0.00  0.00           H  
ATOM   1290  H1'  DT A  40       3.776   5.676  24.630  2.00  0.00           H  
ATOM   1291  H2'  DT A  40       3.381   8.470  25.790  8.00  0.00           H  
ATOM   1292  H3'  DT A  40       1.074   8.177  25.320  1.00  0.00           H  
ATOM   1293  H4'  DT A  40       1.541   6.908  22.880  1.00  0.00           H  
ATOM   1294  H5'  DT A  40       2.093   9.042  21.910  1.00  0.00           H  
ATOM   1295  H71  DT A  40       8.497  10.077  23.820  9.00  0.00           H  
ATOM   1296  H72  DT A  40       7.049  10.669  24.670  1.00  0.00           H  
ATOM   1297  H73  DT A  40       8.461  10.066  25.580  3.00  0.00           H  
ATOM   1298 H2''  DT A  40       3.102   6.891  26.590  9.00  0.00           H  
ATOM   1299 H5''  DT A  40       0.806   9.222  23.110  9.00  0.00           H  
ATOM   1300  P    DT A  41       0.423   5.511  26.400  6.00  0.00           P  
ATOM   1301  C5'  DT A  41       2.134   3.584  26.220  6.00  0.00           C  
ATOM   1302  O5'  DT A  41       1.697   4.721  26.930  1.00  0.00           O  
ATOM   1303  C4'  DT A  41       3.353   2.961  26.870  1.00  0.00           C  
ATOM   1304  O4'  DT A  41       4.496   3.772  26.710  5.00  0.00           O  
ATOM   1305  C3'  DT A  41       3.218   2.669  28.380  0.00  0.00           C  
ATOM   1306  O3'  DT A  41       2.913   1.279  28.550  7.00  0.00           O  
ATOM   1307  C2'  DT A  41       4.601   3.120  28.890  5.00  0.00           C  
ATOM   1308  C1'  DT A  41       5.436   3.278  27.620  7.00  0.00           C  
ATOM   1309  N1   DT A  41       6.641   4.156  27.680  8.00  0.00           N  
ATOM   1310  C2   DT A  41       7.877   3.553  27.400  5.00  0.00           C  
ATOM   1311  O2   DT A  41       8.041   2.334  27.290  4.00  0.00           O  
ATOM   1312  N3   DT A  41       8.959   4.390  27.290  9.00  0.00           N  
ATOM   1313  C4   DT A  41       8.965   5.741  27.520  8.00  0.00           C  
ATOM   1314  O4   DT A  41      10.030   6.340  27.400  9.00  0.00           O  
ATOM   1315  C5   DT A  41       7.668   6.304  27.910  4.00  0.00           C  
ATOM   1316  C6   DT A  41       6.556   5.514  27.940  9.00  0.00           C  
ATOM   1317  C7   DT A  41       7.556   7.784  28.250  9.00  0.00           C  
ATOM   1318  OP1  DT A  41      -0.580   4.467  26.070  9.00  0.00           O  
ATOM   1319  OP2  DT A  41       0.121   6.588  27.360  9.00  0.00           O1-
ATOM   1320  H3   DT A  41       9.830   3.982  26.980  3.00  0.00           H  
ATOM   1321  H6   DT A  41       5.588   5.945  28.170  8.00  0.00           H  
ATOM   1322  H1'  DT A  41       5.738   2.287  27.280  8.00  0.00           H  
ATOM   1323  H2'  DT A  41       4.503   4.084  29.390  7.00  0.00           H  
ATOM   1324  H3'  DT A  41       2.440   3.302  28.810  2.00  0.00           H  
ATOM   1325  H4'  DT A  41       3.541   2.018  26.360  6.00  0.00           H  
ATOM   1326  H5'  DT A  41       2.385   3.871  25.200  6.00  0.00           H  
ATOM   1327  H71  DT A  41       6.526   8.133  28.170  4.00  0.00           H  
ATOM   1328  H72  DT A  41       7.926   7.945  29.260  3.00  0.00           H  
ATOM   1329  H73  DT A  41       8.181   8.365  27.570  5.00  0.00           H  
ATOM   1330 H2''  DT A  41       5.047   2.385  29.560  0.00  0.00           H  
ATOM   1331 H5''  DT A  41       1.335   2.844  26.190  6.00  0.00           H  
ATOM   1332  P    DA A  42       2.350   0.667  29.940  7.00  0.00           P  
ATOM   1333  C5'  DA A  42       4.555  -0.697  30.210  7.00  0.00           C  
ATOM   1334  O5'  DA A  42       3.751   0.379  30.650  7.00  0.00           O  
ATOM   1335  C4'  DA A  42       5.919  -0.714  30.900  0.00  0.00           C  
ATOM   1336  O4'  DA A  42       6.793   0.273  30.360  1.00  0.00           O  
ATOM   1337  C3'  DA A  42       5.800  -0.502  32.420  5.00  0.00           C  
ATOM   1338  O3'  DA A  42       6.612  -1.452  33.110  3.00  0.00           O  
ATOM   1339  C2'  DA A  42       6.319   0.933  32.520  9.00  0.00           C  
ATOM   1340  C1'  DA A  42       7.413   0.930  31.450  4.00  0.00           C  
ATOM   1341  N1   DA A  42      11.626   3.426  29.990  1.00  0.00           N  
ATOM   1342  C2   DA A  42      11.343   2.140  30.090  6.00  0.00           C  
ATOM   1343  N3   DA A  42      10.203   1.567  30.450  9.00  0.00           N  
ATOM   1344  C4   DA A  42       9.240   2.510  30.700  5.00  0.00           C  
ATOM   1345  C5   DA A  42       9.368   3.873  30.630  7.00  0.00           C  
ATOM   1346  C6   DA A  42      10.664   4.309  30.260  3.00  0.00           C  
ATOM   1347  N6   DA A  42      11.040   5.567  30.130  8.00  0.00           N  
ATOM   1348  N7   DA A  42       8.156   4.511  30.930  8.00  0.00           N  
ATOM   1349  C8   DA A  42       7.355   3.514  31.190  2.00  0.00           C  
ATOM   1350  N9   DA A  42       7.944   2.271  31.100  8.00  0.00           N  
ATOM   1351  OP1  DA A  42       1.729  -0.663  29.690  4.00  0.00           O  
ATOM   1352  OP2  DA A  42       1.618   1.684  30.710  2.00  0.00           O1-
ATOM   1353  H2   DA A  42      12.153   1.468  29.840  7.00  0.00           H  
ATOM   1354  H8   DA A  42       6.320   3.660  31.480  3.00  0.00           H  
ATOM   1355  H1'  DA A  42       8.249   0.329  31.820  7.00  0.00           H  
ATOM   1356  H2'  DA A  42       5.524   1.629  32.240  5.00  0.00           H  
ATOM   1357  H3'  DA A  42       4.759  -0.554  32.750  7.00  0.00           H  
ATOM   1358  H4'  DA A  42       6.373  -1.686  30.720  6.00  0.00           H  
ATOM   1359  H5'  DA A  42       4.696  -0.628  29.130  9.00  0.00           H  
ATOM   1360  H61  DA A  42      11.938   5.789  29.710  0.00  0.00           H  
ATOM   1361  H62  DA A  42      10.337   6.279  30.210  3.00  0.00           H  
ATOM   1362 H2''  DA A  42       6.704   1.168  33.510  9.00  0.00           H  
ATOM   1363 H5''  DA A  42       4.028  -1.622  30.440  8.00  0.00           H  
ATOM   1364  P    DG A  43       6.151  -2.142  34.490  1.00  0.00           P  
ATOM   1365  C5'  DG A  43       8.393  -3.479  34.670  4.00  0.00           C  
ATOM   1366  O5'  DG A  43       7.574  -2.444  35.170  1.00  0.00           O  
ATOM   1367  C4'  DG A  43       9.888  -3.302  34.980  1.00  0.00           C  
ATOM   1368  O4'  DG A  43      10.451  -2.212  34.250  5.00  0.00           O  
ATOM   1369  C3'  DG A  43      10.205  -3.117  36.470  2.00  0.00           C  
ATOM   1370  O3'  DG A  43      11.369  -3.897  36.800  7.00  0.00           O  
ATOM   1371  C2'  DG A  43      10.378  -1.595  36.520  4.00  0.00           C  
ATOM   1372  C1'  DG A  43      10.980  -1.244  35.160  1.00  0.00           C  
ATOM   1373  N1   DG A  43      13.021   3.252  33.670  8.00  0.00           N  
ATOM   1374  C2   DG A  43      13.622   2.091  33.990  2.00  0.00           C  
ATOM   1375  N2   DG A  43      14.927   2.118  34.050  7.00  0.00           N  
ATOM   1376  N3   DG A  43      13.000   0.964  34.360  5.00  0.00           N  
ATOM   1377  C4   DG A  43      11.630   1.111  34.370  6.00  0.00           C  
ATOM   1378  C5   DG A  43      10.918   2.259  34.070  7.00  0.00           C  
ATOM   1379  C6   DG A  43      11.660   3.443  33.700  5.00  0.00           C  
ATOM   1380  O6   DG A  43      11.281   4.582  33.450  7.00  0.00           O  
ATOM   1381  N7   DG A  43       9.547   2.023  34.220  5.00  0.00           N  
ATOM   1382  C8   DG A  43       9.474   0.782  34.620  1.00  0.00           C  
ATOM   1383  N9   DG A  43      10.691   0.151  34.720  0.00  0.00           N  
ATOM   1384  OP1  DG A  43       5.532  -3.461  34.210  2.00  0.00           O  
ATOM   1385  OP2  DG A  43       5.441  -1.196  35.360  9.00  0.00           O1-
ATOM   1386  H1   DG A  43      13.587   4.053  33.430  2.00  0.00           H  
ATOM   1387  H8   DG A  43       8.531   0.294  34.840  8.00  0.00           H  
ATOM   1388  H1'  DG A  43      12.062  -1.360  35.220  4.00  0.00           H  
ATOM   1389  H2'  DG A  43       9.399  -1.121  36.630  2.00  0.00           H  
ATOM   1390  H21  DG A  43      15.423   2.983  33.820  6.00  0.00           H  
ATOM   1391  H3'  DG A  43       9.351  -3.419  37.080  1.00  0.00           H  
ATOM   1392  H22  DG A  43      15.378   1.329  34.440  1.00  0.00           H  
ATOM   1393  H4'  DG A  43      10.385  -4.208  34.650  2.00  0.00           H  
ATOM   1394  H5'  DG A  43       8.277  -3.526  33.580  5.00  0.00           H  
ATOM   1395 H2''  DG A  43      11.029  -1.282  37.340  5.00  0.00           H  
ATOM   1396 H5''  DG A  43       8.041  -4.419  35.090  3.00  0.00           H  
ATOM   1397  P    DG A  44      11.664  -4.485  38.290  4.00  0.00           P  
ATOM   1398  C5'  DG A  44      13.653  -2.840  38.840  7.00  0.00           C  
ATOM   1399  O5'  DG A  44      12.296  -3.226  39.070  5.00  0.00           O  
ATOM   1400  C4'  DG A  44      14.061  -1.452  39.370  7.00  0.00           C  
ATOM   1401  O4'  DG A  44      13.476  -0.434  38.570  4.00  0.00           O  
ATOM   1402  C3'  DG A  44      13.697  -1.168  40.840  8.00  0.00           C  
ATOM   1403  O3'  DG A  44      14.758  -0.495  41.500  5.00  0.00           O  
ATOM   1404  C2'  DG A  44      12.532  -0.203  40.660  6.00  0.00           C  
ATOM   1405  C1'  DG A  44      13.016   0.589  39.440  4.00  0.00           C  
ATOM   1406  N1   DG A  44      12.198   4.900  36.800  2.00  0.00           N  
ATOM   1407  C2   DG A  44      13.352   4.318  37.190  4.00  0.00           C  
ATOM   1408  N2   DG A  44      14.454   4.978  36.980  2.00  0.00           N  
ATOM   1409  N3   DG A  44      13.451   3.173  37.870  8.00  0.00           N  
ATOM   1410  C4   DG A  44      12.223   2.615  38.120  2.00  0.00           C  
ATOM   1411  C5   DG A  44      10.985   3.130  37.790  4.00  0.00           C  
ATOM   1412  C6   DG A  44      10.947   4.398  37.100  2.00  0.00           C  
ATOM   1413  O6   DG A  44       9.987   5.089  36.770  6.00  0.00           O  
ATOM   1414  N7   DG A  44       9.970   2.272  38.240  4.00  0.00           N  
ATOM   1415  C8   DG A  44      10.615   1.309  38.830  5.00  0.00           C  
ATOM   1416  N9   DG A  44      11.981   1.442  38.810  4.00  0.00           N  
ATOM   1417  OP1  DG A  44      12.723  -5.519  38.200  8.00  0.00           O  
ATOM   1418  OP2  DG A  44      10.390  -4.907  38.920  1.00  0.00           O1-
ATOM   1419  H1   DG A  44      12.238   5.781  36.310  3.00  0.00           H  
ATOM   1420  H8   DG A  44      10.109   0.479  39.300  6.00  0.00           H  
ATOM   1421  H1'  DG A  44      13.849   1.233  39.740  9.00  0.00           H  
ATOM   1422  H2'  DG A  44      11.627  -0.764  40.420  4.00  0.00           H  
ATOM   1423  H21  DG A  44      14.419   5.892  36.520  7.00  0.00           H  
ATOM   1424  H3'  DG A  44      13.395  -2.073  41.370  3.00  0.00           H  
ATOM   1425  H22  DG A  44      15.278   4.603  37.390  5.00  0.00           H  
ATOM   1426  H4'  DG A  44      15.144  -1.359  39.290  6.00  0.00           H  
ATOM   1427  H5'  DG A  44      13.839  -2.842  37.770  8.00  0.00           H  
ATOM   1428 H2''  DG A  44      12.389   0.437  41.530  2.00  0.00           H  
ATOM   1429 H5''  DG A  44      14.306  -3.587  39.300  1.00  0.00           H  
ATOM   1430  P   DG3 A  45      15.360  -0.992  42.900  4.00  0.00           P  
ATOM   1431  C5' DG3 A  45      17.631   0.307  42.480  1.00  0.00           C  
ATOM   1432  O5' DG3 A  45      16.413   0.197  43.220  2.00  0.00           O  
ATOM   1433  C4' DG3 A  45      18.081   1.726  42.070  8.00  0.00           C  
ATOM   1434  O4' DG3 A  45      17.119   2.297  41.200  8.00  0.00           O  
ATOM   1435  C3' DG3 A  45      18.340   2.730  43.210  8.00  0.00           C  
ATOM   1436  O3' DG3 A  45      19.462   3.550  42.900  0.00  0.00           O  
ATOM   1437  C2' DG3 A  45      17.043   3.524  43.210  4.00  0.00           C  
ATOM   1438  C1' DG3 A  45      16.684   3.541  41.730  6.00  0.00           C  
ATOM   1439  N1  DG3 A  45      13.111   6.657  39.900  9.00  0.00           N  
ATOM   1440  C2  DG3 A  45      14.458   6.741  39.840  1.00  0.00           C  
ATOM   1441  N2  DG3 A  45      14.970   7.808  39.290  0.00  0.00           N  
ATOM   1442  N3  DG3 A  45      15.296   5.829  40.320  3.00  0.00           N  
ATOM   1443  C4  DG3 A  45      14.640   4.775  40.900  6.00  0.00           C  
ATOM   1444  C5  DG3 A  45      13.279   4.577  41.000  4.00  0.00           C  
ATOM   1445  C6  DG3 A  45      12.421   5.588  40.430  2.00  0.00           C  
ATOM   1446  O6  DG3 A  45      11.196   5.633  40.370  5.00  0.00           O  
ATOM   1447  N7  DG3 A  45      13.013   3.370  41.670  4.00  0.00           N  
ATOM   1448  C8  DG3 A  45      14.202   2.906  41.950  6.00  0.00           C  
ATOM   1449  N9  DG3 A  45      15.231   3.704  41.520  2.00  0.00           N  
ATOM   1450  OP1 DG3 A  45      16.095  -2.260  42.650  5.00  0.00           O  
ATOM   1451  OP2 DG3 A  45      14.281  -1.019  43.910  2.00  0.00           O  
ATOM   1452 HO3' DG3 A  45      19.394   4.389  43.370  6.00  0.00           H  
ATOM   1453  H1  DG3 A  45      12.571   7.422  39.530  7.00  0.00           H  
ATOM   1454  H8  DG3 A  45      14.372   1.973  42.470  3.00  0.00           H  
ATOM   1455  H1' DG3 A  45      17.212   4.361  41.230  9.00  0.00           H  
ATOM   1456  H2' DG3 A  45      16.288   2.983  43.780  8.00  0.00           H  
ATOM   1457  H21 DG3 A  45      14.369   8.588  39.020  1.00  0.00           H  
ATOM   1458  H3' DG3 A  45      18.493   2.222  44.160  2.00  0.00           H  
ATOM   1459  H22 DG3 A  45      15.965   7.862  39.190  4.00  0.00           H  
ATOM   1460  H4' DG3 A  45      19.012   1.626  41.520  9.00  0.00           H  
ATOM   1461  H5' DG3 A  45      17.521  -0.254  41.560  2.00  0.00           H  
ATOM   1462 H2'' DG3 A  45      17.169   4.535  43.610  6.00  0.00           H  
ATOM   1463 H5'' DG3 A  45      18.427  -0.157  43.060  5.00  0.00           H  
ATOM   1464  C5' DC5 A  46      10.829  15.875  39.370  8.00  0.00           C  
ATOM   1465  O5' DC5 A  46      11.219  17.236  39.230  0.00  0.00           O  
ATOM   1466  C4' DC5 A  46      12.013  14.910  39.200  5.00  0.00           C  
ATOM   1467  O4' DC5 A  46      11.612  13.575  39.510  8.00  0.00           O  
ATOM   1468  C3' DC5 A  46      12.647  14.870  37.800  4.00  0.00           C  
ATOM   1469  O3' DC5 A  46      14.047  15.033  37.950  7.00  0.00           O  
ATOM   1470  C2' DC5 A  46      12.325  13.459  37.310  0.00  0.00           C  
ATOM   1471  C1' DC5 A  46      12.316  12.706  38.640  4.00  0.00           C  
ATOM   1472  N1  DC5 A  46      11.657  11.373  38.560  8.00  0.00           N  
ATOM   1473  C2  DC5 A  46      12.385  10.232  38.920  1.00  0.00           C  
ATOM   1474  O2  DC5 A  46      13.581  10.278  39.200  5.00  0.00           O  
ATOM   1475  N3  DC5 A  46      11.787   9.020  38.970  8.00  0.00           N  
ATOM   1476  C4  DC5 A  46      10.517   8.925  38.650  7.00  0.00           C  
ATOM   1477  N4  DC5 A  46       9.991   7.738  38.750  3.00  0.00           N  
ATOM   1478  C5  DC5 A  46       9.732  10.034  38.230  8.00  0.00           C  
ATOM   1479  C6  DC5 A  46      10.336  11.250  38.200  4.00  0.00           C  
ATOM   1480 HO5' DC5 A  46      10.621  17.667  38.610  0.00  0.00           H  
ATOM   1481  H5  DC5 A  46       8.692   9.938  37.960  0.00  0.00           H  
ATOM   1482  H6  DC5 A  46       9.784  12.140  37.920  6.00  0.00           H  
ATOM   1483  H1' DC5 A  46      13.353  12.607  38.970  7.00  0.00           H  
ATOM   1484  H2' DC5 A  46      11.350  13.442  36.830  5.00  0.00           H  
ATOM   1485  H3' DC5 A  46      12.217  15.631  37.150  2.00  0.00           H  
ATOM   1486  H4' DC5 A  46      12.789  15.213  39.910  0.00  0.00           H  
ATOM   1487  H41 DC5 A  46      10.554   6.974  39.100  9.00  0.00           H  
ATOM   1488  H5' DC5 A  46      10.056  15.631  38.640  2.00  0.00           H  
ATOM   1489  H42 DC5 A  46       9.071   7.566  38.400  7.00  0.00           H  
ATOM   1490 H2'' DC5 A  46      13.093  13.070  36.640  3.00  0.00           H  
ATOM   1491 H5'' DC5 A  46      10.415  15.734  40.370  4.00  0.00           H  
ATOM   1492  P    DC A  47      14.975  15.484  36.720  0.00  0.00           P  
ATOM   1493  C5'  DC A  47      16.378  13.261  36.620  1.00  0.00           C  
ATOM   1494  O5'  DC A  47      15.350  14.062  36.060  2.00  0.00           O  
ATOM   1495  C4'  DC A  47      16.573  11.888  35.960  3.00  0.00           C  
ATOM   1496  O4'  DC A  47      15.562  10.951  36.350  8.00  0.00           O  
ATOM   1497  C3'  DC A  47      16.605  11.888  34.430  2.00  0.00           C  
ATOM   1498  O3'  DC A  47      17.511  10.887  33.990  1.00  0.00           O  
ATOM   1499  C2'  DC A  47      15.193  11.417  34.120  6.00  0.00           C  
ATOM   1500  C1'  DC A  47      15.095  10.309  35.170  6.00  0.00           C  
ATOM   1501  N1   DC A  47      13.761   9.669  35.360  2.00  0.00           N  
ATOM   1502  C2   DC A  47      13.717   8.318  35.750  2.00  0.00           C  
ATOM   1503  O2   DC A  47      14.741   7.686  36.030  1.00  0.00           O  
ATOM   1504  N3   DC A  47      12.535   7.655  35.820  2.00  0.00           N  
ATOM   1505  C4   DC A  47      11.432   8.309  35.510  2.00  0.00           C  
ATOM   1506  N4   DC A  47      10.309   7.653  35.560  4.00  0.00           N  
ATOM   1507  C5   DC A  47      11.407   9.688  35.170  4.00  0.00           C  
ATOM   1508  C6   DC A  47      12.590  10.344  35.110  7.00  0.00           C  
ATOM   1509  OP1  DC A  47      16.190  16.076  37.320  5.00  0.00           O  
ATOM   1510  OP2  DC A  47      14.151  16.250  35.760  3.00  0.00           O1-
ATOM   1511  H5   DC A  47      10.492  10.217  34.960  2.00  0.00           H  
ATOM   1512  H6   DC A  47      12.609  11.396  34.850  9.00  0.00           H  
ATOM   1513  H1'  DC A  47      15.806   9.529  34.880  1.00  0.00           H  
ATOM   1514  H2'  DC A  47      14.493  12.233  34.300  7.00  0.00           H  
ATOM   1515  H3'  DC A  47      16.822  12.873  34.000  1.00  0.00           H  
ATOM   1516  H4'  DC A  47      17.541  11.517  36.290  9.00  0.00           H  
ATOM   1517  H41  DC A  47      10.315   6.674  35.830  0.00  0.00           H  
ATOM   1518  H5'  DC A  47      16.158  13.102  37.680  5.00  0.00           H  
ATOM   1519  H42  DC A  47       9.470   8.100  35.250  6.00  0.00           H  
ATOM   1520 H2''  DC A  47      15.113  11.040  33.100  8.00  0.00           H  
ATOM   1521 H5''  DC A  47      17.314  13.816  36.550  9.00  0.00           H  
ATOM   1522  P    DC A  48      18.684  11.225  32.970  6.00  0.00           P  
ATOM   1523  C5'  DC A  48      20.119   9.258  33.920  2.00  0.00           C  
ATOM   1524  O5'  DC A  48      19.336   9.775  32.870  7.00  0.00           O  
ATOM   1525  C4'  DC A  48      20.279   7.733  33.820  7.00  0.00           C  
ATOM   1526  O4'  DC A  48      19.043   7.098  34.160  8.00  0.00           O  
ATOM   1527  C3'  DC A  48      20.720   7.168  32.450  3.00  0.00           C  
ATOM   1528  O3'  DC A  48      21.459   5.968  32.720  9.00  0.00           O  
ATOM   1529  C2'  DC A  48      19.354   6.915  31.820  9.00  0.00           C  
ATOM   1530  C1'  DC A  48      18.548   6.396  33.020  7.00  0.00           C  
ATOM   1531  N1   DC A  48      17.059   6.544  32.920  6.00  0.00           N  
ATOM   1532  C2   DC A  48      16.239   5.444  33.240  1.00  0.00           C  
ATOM   1533  O2   DC A  48      16.701   4.356  33.600  9.00  0.00           O  
ATOM   1534  N3   DC A  48      14.886   5.525  33.160  5.00  0.00           N  
ATOM   1535  C4   DC A  48      14.354   6.674  32.790  0.00  0.00           C  
ATOM   1536  N4   DC A  48      13.056   6.735  32.710  1.00  0.00           N  
ATOM   1537  C5   DC A  48      15.123   7.827  32.470  7.00  0.00           C  
ATOM   1538  C6   DC A  48      16.475   7.737  32.560  1.00  0.00           C  
ATOM   1539  OP1  DC A  48      19.632  12.125  33.660  2.00  0.00           O  
ATOM   1540  OP2  DC A  48      18.077  11.553  31.670  6.00  0.00           O1-
ATOM   1541  H5   DC A  48      14.669   8.754  32.160  5.00  0.00           H  
ATOM   1542  H6   DC A  48      17.094   8.605  32.340  9.00  0.00           H  
ATOM   1543  H1'  DC A  48      18.805   5.340  33.130  8.00  0.00           H  
ATOM   1544  H2'  DC A  48      18.947   7.843  31.420  3.00  0.00           H  
ATOM   1545  H3'  DC A  48      21.303   7.895  31.880  1.00  0.00           H  
ATOM   1546  H4'  DC A  48      21.028   7.448  34.550  5.00  0.00           H  
ATOM   1547  H41  DC A  48      12.486   5.928  32.940  1.00  0.00           H  
ATOM   1548  H5'  DC A  48      19.629   9.490  34.870  2.00  0.00           H  
ATOM   1549  H42  DC A  48      12.631   7.556  32.330  7.00  0.00           H  
ATOM   1550 H2''  DC A  48      19.425   6.183  31.020  2.00  0.00           H  
ATOM   1551 H5''  DC A  48      21.093   9.748  33.910  9.00  0.00           H  
ATOM   1552  P    DT A  49      22.270   5.116  31.620  6.00  0.00           P  
ATOM   1553  C5'  DT A  49      20.911   2.893  31.370  1.00  0.00           C  
ATOM   1554  O5'  DT A  49      21.135   4.212  30.920  8.00  0.00           O  
ATOM   1555  C4'  DT A  49      19.684   2.206  30.770  9.00  0.00           C  
ATOM   1556  O4'  DT A  49      18.510   2.873  31.190  5.00  0.00           O  
ATOM   1557  C3'  DT A  49      19.656   2.058  29.240  1.00  0.00           C  
ATOM   1558  O3'  DT A  49      20.181   0.767  28.900  0.00  0.00           O  
ATOM   1559  C2'  DT A  49      18.158   2.195  28.940  1.00  0.00           C  
ATOM   1560  C1'  DT A  49      17.487   2.549  30.270  2.00  0.00           C  
ATOM   1561  N1   DT A  49      16.527   3.670  30.140  9.00  0.00           N  
ATOM   1562  C2   DT A  49      15.167   3.365  30.260  6.00  0.00           C  
ATOM   1563  O2   DT A  49      14.753   2.247  30.590  1.00  0.00           O  
ATOM   1564  N3   DT A  49      14.295   4.382  29.970  8.00  0.00           N  
ATOM   1565  C4   DT A  49      14.627   5.655  29.570  9.00  0.00           C  
ATOM   1566  O4   DT A  49      13.718   6.439  29.330  8.00  0.00           O  
ATOM   1567  C5   DT A  49      16.065   5.918  29.490  3.00  0.00           C  
ATOM   1568  C6   DT A  49      16.956   4.931  29.770  0.00  0.00           C  
ATOM   1569  C7   DT A  49      16.577   7.292  29.080  9.00  0.00           C  
ATOM   1570  OP1  DT A  49      23.164   4.181  32.360  1.00  0.00           O  
ATOM   1571  OP2  DT A  49      22.843   6.005  30.590  9.00  0.00           O1-
ATOM   1572  H3   DT A  49      13.309   4.169  30.010  9.00  0.00           H  
ATOM   1573  H6   DT A  49      18.018   5.123  29.690  7.00  0.00           H  
ATOM   1574  H1'  DT A  49      16.960   1.668  30.640  8.00  0.00           H  
ATOM   1575  H2'  DT A  49      18.001   2.973  28.190  7.00  0.00           H  
ATOM   1576  H3'  DT A  49      20.208   2.877  28.770  8.00  0.00           H  
ATOM   1577  H4'  DT A  49      19.646   1.198  31.180  9.00  0.00           H  
ATOM   1578  H5'  DT A  49      20.786   2.925  32.450  6.00  0.00           H  
ATOM   1579  H71  DT A  49      16.091   8.057  29.690  1.00  0.00           H  
ATOM   1580  H72  DT A  49      17.657   7.371  29.210  9.00  0.00           H  
ATOM   1581  H73  DT A  49      16.322   7.485  28.040  4.00  0.00           H  
ATOM   1582 H2''  DT A  49      17.735   1.261  28.580  9.00  0.00           H  
ATOM   1583 H5''  DT A  49      21.795   2.303  31.130  9.00  0.00           H  
ATOM   1584  P    DA A  50      20.460   0.283  27.380  3.00  0.00           P  
ATOM   1585  C5'  DA A  50      18.468  -1.376  27.430  3.00  0.00           C  
ATOM   1586  O5'  DA A  50      18.992  -0.179  26.890  7.00  0.00           O  
ATOM   1587  C4'  DA A  50      17.008  -1.762  27.170  7.00  0.00           C  
ATOM   1588  O4'  DA A  50      16.096  -0.747  27.580  3.00  0.00           O  
ATOM   1589  C3'  DA A  50      16.655  -2.201  25.740  8.00  0.00           C  
ATOM   1590  O3'  DA A  50      15.846  -3.367  25.930  3.00  0.00           O  
ATOM   1591  C2'  DA A  50      15.933  -0.948  25.250  1.00  0.00           C  
ATOM   1592  C1'  DA A  50      15.215  -0.448  26.500  3.00  0.00           C  
ATOM   1593  N1   DA A  50      11.468   3.057  26.620  4.00  0.00           N  
ATOM   1594  C2   DA A  50      11.452   1.746  26.780  3.00  0.00           C  
ATOM   1595  N3   DA A  50      12.487   0.906  26.790  9.00  0.00           N  
ATOM   1596  C4   DA A  50      13.662   1.571  26.580  4.00  0.00           C  
ATOM   1597  C5   DA A  50      13.839   2.920  26.400  6.00  0.00           C  
ATOM   1598  C6   DA A  50      12.636   3.668  26.430  6.00  0.00           C  
ATOM   1599  N6   DA A  50      12.544   4.974  26.260  8.00  0.00           N  
ATOM   1600  N7   DA A  50      15.198   3.229  26.230  4.00  0.00           N  
ATOM   1601  C8   DA A  50      15.777   2.059  26.260  9.00  0.00           C  
ATOM   1602  N9   DA A  50      14.915   1.005  26.470  6.00  0.00           N  
ATOM   1603  OP1  DA A  50      21.280  -0.957  27.460  5.00  0.00           O  
ATOM   1604  OP2  DA A  50      20.963   1.417  26.590  3.00  0.00           O1-
ATOM   1605  H2   DA A  50      10.475   1.308  26.940  6.00  0.00           H  
ATOM   1606  H8   DA A  50      16.846   1.932  26.140  6.00  0.00           H  
ATOM   1607  H1'  DA A  50      14.277  -1.000  26.610  6.00  0.00           H  
ATOM   1608  H2'  DA A  50      16.671  -0.212  24.920  1.00  0.00           H  
ATOM   1609  H3'  DA A  50      17.546  -2.409  25.150  8.00  0.00           H  
ATOM   1610  H4'  DA A  50      16.827  -2.625  27.810  2.00  0.00           H  
ATOM   1611  H5'  DA A  50      18.588  -1.319  28.520  5.00  0.00           H  
ATOM   1612  H61  DA A  50      11.634   5.417  26.350  6.00  0.00           H  
ATOM   1613  H62  DA A  50      13.373   5.516  26.110  9.00  0.00           H  
ATOM   1614 H2''  DA A  50      15.233  -1.166  24.440  5.00  0.00           H  
ATOM   1615 H5''  DA A  50      19.092  -2.187  27.070  1.00  0.00           H  
ATOM   1616  P    DA A  51      15.542  -4.477  24.800  8.00  0.00           P  
ATOM   1617  C5'  DA A  51      13.075  -3.606  24.590  0.00  0.00           C  
ATOM   1618  O5'  DA A  51      14.342  -3.795  23.970  5.00  0.00           O  
ATOM   1619  C4'  DA A  51      12.030  -2.740  23.880  6.00  0.00           C  
ATOM   1620  O4'  DA A  51      12.237  -1.349  24.000  1.00  0.00           O  
ATOM   1621  C3'  DA A  51      11.731  -3.038  22.400  6.00  0.00           C  
ATOM   1622  O3'  DA A  51      10.514  -3.781  22.420  7.00  0.00           O  
ATOM   1623  C2'  DA A  51      11.659  -1.618  21.810  5.00  0.00           C  
ATOM   1624  C1'  DA A  51      11.359  -0.775  23.040  9.00  0.00           C  
ATOM   1625  N1   DA A  51       9.298   3.785  24.060  3.00  0.00           N  
ATOM   1626  C2   DA A  51       8.815   2.553  24.140  7.00  0.00           C  
ATOM   1627  N3   DA A  51       9.435   1.412  23.840  4.00  0.00           N  
ATOM   1628  C4   DA A  51      10.695   1.639  23.370  1.00  0.00           C  
ATOM   1629  C5   DA A  51      11.327   2.842  23.210  5.00  0.00           C  
ATOM   1630  C6   DA A  51      10.536   3.949  23.600  7.00  0.00           C  
ATOM   1631  N6   DA A  51      10.929   5.204  23.540  3.00  0.00           N  
ATOM   1632  N7   DA A  51      12.618   2.669  22.680  2.00  0.00           N  
ATOM   1633  C8   DA A  51      12.709   1.374  22.550  9.00  0.00           C  
ATOM   1634  N9   DA A  51      11.592   0.683  22.950  4.00  0.00           N  
ATOM   1635  OP1  DA A  51      15.024  -5.666  25.530  0.00  0.00           O  
ATOM   1636  OP2  DA A  51      16.739  -4.682  23.960  7.00  0.00           O1-
ATOM   1637  H2   DA A  51       7.799   2.467  24.500  0.00  0.00           H  
ATOM   1638  H8   DA A  51      13.595   0.887  22.170  0.00  0.00           H  
ATOM   1639  H1'  DA A  51      10.311  -0.926  23.330  2.00  0.00           H  
ATOM   1640  H2'  DA A  51      12.631  -1.340  21.400  6.00  0.00           H  
ATOM   1641  H3'  DA A  51      12.542  -3.600  21.940  9.00  0.00           H  
ATOM   1642  H4'  DA A  51      11.095  -2.918  24.410  8.00  0.00           H  
ATOM   1643  H5'  DA A  51      13.236  -3.149  25.570  9.00  0.00           H  
ATOM   1644  H61  DA A  51      10.286   5.945  23.810  4.00  0.00           H  
ATOM   1645  H62  DA A  51      11.832   5.417  23.180  6.00  0.00           H  
ATOM   1646 H2''  DA A  51      10.883  -1.528  21.050  9.00  0.00           H  
ATOM   1647 H5''  DA A  51      12.631  -4.588  24.750  0.00  0.00           H  
ATOM   1648  P    DC A  52       9.798  -4.398  21.120  2.00  0.00           P  
ATOM   1649  C5'  DC A  52       7.458  -3.279  21.660  9.00  0.00           C  
ATOM   1650  O5'  DC A  52       8.611  -3.351  20.810  3.00  0.00           O  
ATOM   1651  C4'  DC A  52       6.449  -2.164  21.340  7.00  0.00           C  
ATOM   1652  O4'  DC A  52       7.033  -0.893  21.580  9.00  0.00           O  
ATOM   1653  C3'  DC A  52       5.899  -2.179  19.910  0.00  0.00           C  
ATOM   1654  O3'  DC A  52       4.493  -1.996  19.990  1.00  0.00           O  
ATOM   1655  C2'  DC A  52       6.658  -1.017  19.280  9.00  0.00           C  
ATOM   1656  C1'  DC A  52       6.784  -0.051  20.460  0.00  0.00           C  
ATOM   1657  N1   DC A  52       7.890   0.952  20.370  0.00  0.00           N  
ATOM   1658  C2   DC A  52       7.636   2.263  20.790  1.00  0.00           C  
ATOM   1659  O2   DC A  52       6.546   2.582  21.240  2.00  0.00           O  
ATOM   1660  N3   DC A  52       8.597   3.213  20.700  3.00  0.00           N  
ATOM   1661  C4   DC A  52       9.784   2.881  20.270  2.00  0.00           C  
ATOM   1662  N4   DC A  52      10.671   3.835  20.260  2.00  0.00           N  
ATOM   1663  C5   DC A  52      10.140   1.548  19.910  0.00  0.00           C  
ATOM   1664  C6   DC A  52       9.160   0.608  19.970  3.00  0.00           C  
ATOM   1665  OP1  DC A  52       9.219  -5.691  21.570  1.00  0.00           O  
ATOM   1666  OP2  DC A  52      10.782  -4.439  20.020  0.00  0.00           O1-
ATOM   1667  H5   DC A  52      11.135   1.283  19.600  1.00  0.00           H  
ATOM   1668  H6   DC A  52       9.365  -0.425  19.730  9.00  0.00           H  
ATOM   1669  H1'  DC A  52       5.819   0.465  20.580  5.00  0.00           H  
ATOM   1670  H2'  DC A  52       7.627  -1.379  18.940  3.00  0.00           H  
ATOM   1671  H3'  DC A  52       6.130  -3.116  19.400  3.00  0.00           H  
ATOM   1672  H4'  DC A  52       5.596  -2.270  22.010  8.00  0.00           H  
ATOM   1673  H41  DC A  52      10.359   4.768  20.520  8.00  0.00           H  
ATOM   1674  H5'  DC A  52       7.782  -3.128  22.690  9.00  0.00           H  
ATOM   1675  H42  DC A  52      11.630   3.637  20.090  1.00  0.00           H  
ATOM   1676 H2''  DC A  52       6.105  -0.584  18.450  1.00  0.00           H  
ATOM   1677 H5''  DC A  52       6.928  -4.229  21.610  7.00  0.00           H  
ATOM   1678  P    DC A  53       3.511  -2.132  18.730  7.00  0.00           P  
ATOM   1679  C5'  DC A  53       2.525   0.334  19.000  6.00  0.00           C  
ATOM   1680  O5'  DC A  53       3.322  -0.597  18.250  5.00  0.00           O  
ATOM   1681  C4'  DC A  53       2.715   1.815  18.610  9.00  0.00           C  
ATOM   1682  O4'  DC A  53       4.056   2.243  18.810  6.00  0.00           O  
ATOM   1683  C3'  DC A  53       2.352   2.145  17.160  7.00  0.00           C  
ATOM   1684  O3'  DC A  53       1.146   2.883  17.130  3.00  0.00           O  
ATOM   1685  C2'  DC A  53       3.557   2.945  16.660  1.00  0.00           C  
ATOM   1686  C1'  DC A  53       4.305   3.329  17.930  2.00  0.00           C  
ATOM   1687  N1   DC A  53       5.764   3.466  17.680  1.00  0.00           N  
ATOM   1688  C2   DC A  53       6.357   4.735  17.630  7.00  0.00           C  
ATOM   1689  O2   DC A  53       5.712   5.761  17.790  1.00  0.00           O  
ATOM   1690  N3   DC A  53       7.683   4.858  17.380  5.00  0.00           N  
ATOM   1691  C4   DC A  53       8.382   3.778  17.150  1.00  0.00           C  
ATOM   1692  N4   DC A  53       9.637   3.993  16.890  7.00  0.00           N  
ATOM   1693  C5   DC A  53       7.846   2.456  17.160  8.00  0.00           C  
ATOM   1694  C6   DC A  53       6.519   2.346  17.430  0.00  0.00           C  
ATOM   1695  OP1  DC A  53       2.255  -2.688  19.280  7.00  0.00           O  
ATOM   1696  OP2  DC A  53       4.234  -2.902  17.690  6.00  0.00           O1-
ATOM   1697  H5   DC A  53       8.434   1.576  16.970  2.00  0.00           H  
ATOM   1698  H6   DC A  53       6.017   1.387  17.460  6.00  0.00           H  
ATOM   1699  H1'  DC A  53       3.885   4.265  18.330  7.00  0.00           H  
ATOM   1700  H2'  DC A  53       4.160   2.311  16.010  0.00  0.00           H  
ATOM   1701  H3'  DC A  53       2.243   1.231  16.580  1.00  0.00           H  
ATOM   1702  H4'  DC A  53       2.067   2.427  19.240  3.00  0.00           H  
ATOM   1703  H41  DC A  53       9.888   4.978  16.880  3.00  0.00           H  
ATOM   1704  H5'  DC A  53       2.764   0.246  20.060  0.00  0.00           H  
ATOM   1705  H42  DC A  53      10.252   3.245  16.680  0.00  0.00           H  
ATOM   1706 H2''  DC A  53       3.266   3.843  16.120  8.00  0.00           H  
ATOM   1707 H5''  DC A  53       1.471   0.085  18.870  2.00  0.00           H  
ATOM   1708  P    DC A  54       0.425   3.274  15.740  8.00  0.00           P  
ATOM   1709  C5'  DC A  54       0.954   5.806  16.350  6.00  0.00           C  
ATOM   1710  O5'  DC A  54       1.099   4.714  15.440  3.00  0.00           O  
ATOM   1711  C4'  DC A  54       1.757   7.062  15.960  9.00  0.00           C  
ATOM   1712  O4'  DC A  54       3.158   6.809  15.970  3.00  0.00           O  
ATOM   1713  C3'  DC A  54       1.400   7.614  14.580  5.00  0.00           C  
ATOM   1714  O3'  DC A  54       1.166   9.012  14.660  6.00  0.00           O  
ATOM   1715  C2'  DC A  54       2.659   7.299  13.780  9.00  0.00           C  
ATOM   1716  C1'  DC A  54       3.716   7.481  14.860  2.00  0.00           C  
ATOM   1717  N1   DC A  54       5.033   6.887  14.520  0.00  0.00           N  
ATOM   1718  C2   DC A  54       6.154   7.719  14.450  0.00  0.00           C  
ATOM   1719  O2   DC A  54       6.077   8.939  14.500  1.00  0.00           O  
ATOM   1720  N3   DC A  54       7.387   7.185  14.310  4.00  0.00           N  
ATOM   1721  C4   DC A  54       7.509   5.890  14.220  5.00  0.00           C  
ATOM   1722  N4   DC A  54       8.737   5.483  14.120  3.00  0.00           N  
ATOM   1723  C5   DC A  54       6.411   4.984  14.200  6.00  0.00           C  
ATOM   1724  C6   DC A  54       5.174   5.530  14.350  4.00  0.00           C  
ATOM   1725  OP1  DC A  54      -1.012   3.437  16.030  5.00  0.00           O  
ATOM   1726  OP2  DC A  54       0.880   2.273  14.740  4.00  0.00           O1-
ATOM   1727  H5   DC A  54       6.532   3.923  14.080  5.00  0.00           H  
ATOM   1728  H6   DC A  54       4.280   4.917  14.370  7.00  0.00           H  
ATOM   1729  H1'  DC A  54       3.817   8.554  15.070  8.00  0.00           H  
ATOM   1730  H2'  DC A  54       2.620   6.269  13.420  3.00  0.00           H  
ATOM   1731  H3'  DC A  54       0.527   7.097  14.170  7.00  0.00           H  
ATOM   1732  H4'  DC A  54       1.551   7.845  16.690  6.00  0.00           H  
ATOM   1733  H41  DC A  54       9.422   6.238  14.110  3.00  0.00           H  
ATOM   1734  H5'  DC A  54       1.283   5.495  17.340  8.00  0.00           H  
ATOM   1735  H42  DC A  54       8.949   4.522  14.010  8.00  0.00           H  
ATOM   1736 H2''  DC A  54       2.806   7.996  12.950  1.00  0.00           H  
ATOM   1737 H5''  DC A  54      -0.100   6.081  16.420  9.00  0.00           H  
ATOM   1738  P    DT A  55       0.429   9.818  13.470  2.00  0.00           P  
ATOM   1739  C5'  DT A  55       2.592  11.246  12.890  0.00  0.00           C  
ATOM   1740  O5'  DT A  55       1.656  10.241  12.500  9.00  0.00           O  
ATOM   1741  C4'  DT A  55       3.798  11.393  11.940  4.00  0.00           C  
ATOM   1742  O4'  DT A  55       4.647  10.255  12.080  7.00  0.00           O  
ATOM   1743  C3'  DT A  55       3.447  11.519  10.440  6.00  0.00           C  
ATOM   1744  O3'  DT A  55       4.279  12.464   9.760  1.00  0.00           O  
ATOM   1745  C2'  DT A  55       3.802  10.112   9.960  5.00  0.00           C  
ATOM   1746  C1'  DT A  55       5.076   9.886  10.780  3.00  0.00           C  
ATOM   1747  N1   DT A  55       5.658   8.511  10.810  6.00  0.00           N  
ATOM   1748  C2   DT A  55       7.053   8.411  10.900  6.00  0.00           C  
ATOM   1749  O2   DT A  55       7.822   9.364  10.930  0.00  0.00           O  
ATOM   1750  N3   DT A  55       7.587   7.147  10.940  3.00  0.00           N  
ATOM   1751  C4   DT A  55       6.888   5.963  10.940  8.00  0.00           C  
ATOM   1752  O4   DT A  55       7.511   4.897  11.020  3.00  0.00           O  
ATOM   1753  C5   DT A  55       5.433   6.130  10.880  4.00  0.00           C  
ATOM   1754  C6   DT A  55       4.873   7.372  10.820  5.00  0.00           C  
ATOM   1755  C7   DT A  55       4.524   4.913  10.920  7.00  0.00           C  
ATOM   1756  OP1  DT A  55      -0.171  11.032  14.060  4.00  0.00           O  
ATOM   1757  OP2  DT A  55      -0.432   8.862  12.740  2.00  0.00           O1-
ATOM   1758  H3   DT A  55       8.594   7.121  11.010  3.00  0.00           H  
ATOM   1759  H6   DT A  55       3.797   7.479  10.810  9.00  0.00           H  
ATOM   1760  H1'  DT A  55       5.838  10.595  10.440  7.00  0.00           H  
ATOM   1761  H2'  DT A  55       3.008   9.424  10.250  3.00  0.00           H  
ATOM   1762  H3'  DT A  55       2.388  11.749  10.300  7.00  0.00           H  
ATOM   1763  H4'  DT A  55       4.358  12.282  12.230  9.00  0.00           H  
ATOM   1764  H5'  DT A  55       2.980  11.005  13.880  3.00  0.00           H  
ATOM   1765  H71  DT A  55       4.867   4.226  11.690  5.00  0.00           H  
ATOM   1766  H72  DT A  55       3.494   5.200  11.130  6.00  0.00           H  
ATOM   1767  H73  DT A  55       4.566   4.401   9.960  3.00  0.00           H  
ATOM   1768 H2''  DT A  55       3.988  10.085   8.890  9.00  0.00           H  
ATOM   1769 H5''  DT A  55       2.078  12.206  12.960  1.00  0.00           H  
ATOM   1770  P    DA A  56       3.713  13.417   8.590  0.00  0.00           P  
ATOM   1771  C5'  DA A  56       5.654  15.230   8.810  0.00  0.00           C  
ATOM   1772  O5'  DA A  56       5.044  14.177   8.070  1.00  0.00           O  
ATOM   1773  C4'  DA A  56       7.119  15.490   8.410  1.00  0.00           C  
ATOM   1774  O4'  DA A  56       7.940  14.380   8.760  2.00  0.00           O  
ATOM   1775  C3'  DA A  56       7.340  15.781   6.910  7.00  0.00           C  
ATOM   1776  O3'  DA A  56       8.353  16.780   6.770  4.00  0.00           O  
ATOM   1777  C2'  DA A  56       7.729  14.396   6.400  3.00  0.00           C  
ATOM   1778  C1'  DA A  56       8.436  13.743   7.590  9.00  0.00           C  
ATOM   1779  N1   DA A  56      10.806   9.191   7.710  6.00  0.00           N  
ATOM   1780  C2   DA A  56      11.266  10.434   7.650  8.00  0.00           C  
ATOM   1781  N3   DA A  56      10.562  11.558   7.610  0.00  0.00           N  
ATOM   1782  C4   DA A  56       9.219  11.326   7.680  9.00  0.00           C  
ATOM   1783  C5   DA A  56       8.592  10.109   7.740  8.00  0.00           C  
ATOM   1784  C6   DA A  56       9.489   9.015   7.780  7.00  0.00           C  
ATOM   1785  N6   DA A  56       9.137   7.746   7.870  9.00  0.00           N  
ATOM   1786  N7   DA A  56       7.192  10.250   7.740  4.00  0.00           N  
ATOM   1787  C8   DA A  56       7.045  11.554   7.740  7.00  0.00           C  
ATOM   1788  N9   DA A  56       8.221  12.272   7.670  9.00  0.00           N  
ATOM   1789  OP1  DA A  56       2.797  14.415   9.180  6.00  0.00           O  
ATOM   1790  OP2  DA A  56       3.247  12.549   7.490  2.00  0.00           O1-
ATOM   1791  H2   DA A  56      12.342  10.543   7.610  1.00  0.00           H  
ATOM   1792  H8   DA A  56       6.077  12.036   7.780  7.00  0.00           H  
ATOM   1793  H1'  DA A  56       9.509  13.941   7.510  9.00  0.00           H  
ATOM   1794  H2'  DA A  56       6.826  13.842   6.140  2.00  0.00           H  
ATOM   1795  H3'  DA A  56       6.410  16.116   6.450  9.00  0.00           H  
ATOM   1796  H4'  DA A  56       7.467  16.354   8.970  9.00  0.00           H  
ATOM   1797  H5'  DA A  56       5.636  14.987   9.880  9.00  0.00           H  
ATOM   1798  H61  DA A  56       9.873   7.049   7.880  6.00  0.00           H  
ATOM   1799  H62  DA A  56       8.174   7.523   8.030  0.00  0.00           H  
ATOM   1800 H2''  DA A  56       8.389  14.459   5.530  0.00  0.00           H  
ATOM   1801 H5''  DA A  56       5.079  16.145   8.670  6.00  0.00           H  
ATOM   1802  P    DA A  57       8.641  17.528   5.370  4.00  0.00           P  
ATOM   1803  C5'  DA A  57      11.008  16.374   5.250  6.00  0.00           C  
ATOM   1804  O5'  DA A  57       9.726  16.565   4.670  2.00  0.00           O  
ATOM   1805  C4'  DA A  57      11.856  15.307   4.540  5.00  0.00           C  
ATOM   1806  O4'  DA A  57      11.314  14.023   4.800  9.00  0.00           O  
ATOM   1807  C3'  DA A  57      11.957  15.454   3.010  4.00  0.00           C  
ATOM   1808  O3'  DA A  57      13.295  15.192   2.590  9.00  0.00           O  
ATOM   1809  C2'  DA A  57      11.027  14.333   2.550  7.00  0.00           C  
ATOM   1810  C1'  DA A  57      11.395  13.290   3.600  5.00  0.00           C  
ATOM   1811  N1   DA A  57      11.383   8.250   4.380  7.00  0.00           N  
ATOM   1812  C2   DA A  57      12.365   9.108   4.140  5.00  0.00           C  
ATOM   1813  N3   DA A  57      12.255  10.396   3.840  5.00  0.00           N  
ATOM   1814  C4   DA A  57      10.961  10.823   3.880  5.00  0.00           C  
ATOM   1815  C5   DA A  57       9.843  10.068   4.110  9.00  0.00           C  
ATOM   1816  C6   DA A  57      10.132   8.709   4.380  9.00  0.00           C  
ATOM   1817  N6   DA A  57       9.226   7.787   4.630  1.00  0.00           N  
ATOM   1818  N7   DA A  57       8.672  10.847   4.010  6.00  0.00           N  
ATOM   1819  C8   DA A  57       9.147  12.048   3.800  8.00  0.00           C  
ATOM   1820  N9   DA A  57      10.516  12.109   3.700  6.00  0.00           N  
ATOM   1821  OP1  DA A  57       9.287  18.830   5.670  7.00  0.00           O  
ATOM   1822  OP2  DA A  57       7.410  17.518   4.550  5.00  0.00           O1-
ATOM   1823  H2   DA A  57      13.370   8.705   4.150  8.00  0.00           H  
ATOM   1824  H8   DA A  57       8.525  12.929   3.720  5.00  0.00           H  
ATOM   1825  H1'  DA A  57      12.429  12.962   3.450  9.00  0.00           H  
ATOM   1826  H2'  DA A  57       9.985  14.643   2.650  3.00  0.00           H  
ATOM   1827  H3'  DA A  57      11.613  16.438   2.690  0.00  0.00           H  
ATOM   1828  H4'  DA A  57      12.865  15.335   4.960  2.00  0.00           H  
ATOM   1829  H5'  DA A  57      10.883  16.062   6.290  4.00  0.00           H  
ATOM   1830  H61  DA A  57       9.524   6.831   4.810  2.00  0.00           H  
ATOM   1831  H62  DA A  57       8.272   8.067   4.740  9.00  0.00           H  
ATOM   1832 H2''  DA A  57      11.256  14.002   1.540  9.00  0.00           H  
ATOM   1833 H5''  DA A  57      11.546  17.320   5.240  2.00  0.00           H  
ATOM   1834  P   DCP A  58      13.941  15.863   1.280  1.00  0.00           P  
ATOM   1835  C5' DCP A  58      13.792  13.636  -0.160  1.00  0.00           C  
ATOM   1836  O5' DCP A  58      13.364  14.976   0.050  9.00  0.00           O  
ATOM   1837  C4' DCP A  58      13.179  13.077  -1.460  5.00  0.00           C  
ATOM   1838  O4' DCP A  58      11.765  13.296  -1.470  4.00  0.00           O  
ATOM   1839  C3' DCP A  58      13.745  13.748  -2.720  7.00  0.00           C  
ATOM   1840  O3' DCP A  58      14.844  13.039  -3.290  6.00  0.00           O  
ATOM   1841  C2' DCP A  58      12.559  13.699  -3.670  4.00  0.00           C  
ATOM   1842  C1' DCP A  58      11.317  13.563  -2.780  4.00  0.00           C  
ATOM   1843  N1  DCP A  58      10.454  14.783  -2.880  5.00  0.00           N  
ATOM   1844  C2  DCP A  58       9.553  14.857  -3.950  5.00  0.00           C  
ATOM   1845  O2  DCP A  58       9.362  13.892  -4.690  1.00  0.00           O  
ATOM   1846  N3  DCP A  58       8.895  16.013  -4.190  5.00  0.00           N  
ATOM   1847  C4  DCP A  58       9.022  17.068  -3.410  1.00  0.00           C  
ATOM   1848  N4  DCP A  58       8.344  18.157  -3.710  9.00  0.00           N  
ATOM   1849  C5  DCP A  58       9.902  17.028  -2.280  1.00  0.00           C  
ATOM   1850  C6  DCP A  58      10.612  15.880  -2.050  0.00  0.00           C  
ATOM   1851  OP1 DCP A  58      15.406  15.701   1.340  6.00  0.00           O  
ATOM   1852  OP2 DCP A  58      13.387  17.224   1.130  7.00  0.00           O  
ATOM   1853  H3  DCP A  58       8.285  16.049  -5.000  4.00  0.00           H  
ATOM   1854  H5  DCP A  58      10.032  17.878  -1.620  2.00  0.00           H  
ATOM   1855  H6  DCP A  58      11.316  15.815  -1.220  8.00  0.00           H  
ATOM   1856  H1' DCP A  58      10.741  12.699  -3.120  6.00  0.00           H  
ATOM   1857  H2' DCP A  58      12.539  14.601  -4.280  7.00  0.00           H  
ATOM   1858  H3' DCP A  58      14.016  14.778  -2.480  3.00  0.00           H  
ATOM   1859  H4' DCP A  58      13.382  12.007  -1.520  6.00  0.00           H  
ATOM   1860  H41 DCP A  58       7.804  18.216  -4.580  9.00  0.00           H  
ATOM   1861  H5' DCP A  58      13.502  13.005   0.670  5.00  0.00           H  
ATOM   1862  H42 DCP A  58       8.339  18.958  -3.090  1.00  0.00           H  
ATOM   1863 H2'' DCP A  58      12.634  12.824  -4.320  6.00  0.00           H  
ATOM   1864 H5'' DCP A  58      14.881  13.609  -0.250  5.00  0.00           H  
ATOM   1865  P   DCP A  59      15.934  13.760  -4.250  3.00  0.00           P  
ATOM   1866  C5' DCP A  59      15.609  12.045  -6.260  0.00  0.00           C  
ATOM   1867  O5' DCP A  59      15.528  13.368  -5.750  0.00  0.00           O  
ATOM   1868  C4' DCP A  59      15.561  12.062  -7.800  4.00  0.00           C  
ATOM   1869  O4' DCP A  59      14.630  13.064  -8.200  0.00  0.00           O  
ATOM   1870  C3' DCP A  59      16.918  12.373  -8.460  3.00  0.00           C  
ATOM   1871  O3' DCP A  59      17.176  11.453  -9.510  2.00  0.00           O  
ATOM   1872  C2' DCP A  59      16.761  13.801  -8.970  3.00  0.00           C  
ATOM   1873  C1' DCP A  59      15.241  13.992  -9.070  9.00  0.00           C  
ATOM   1874  N1  DCP A  59      14.795  15.382  -8.740  1.00  0.00           N  
ATOM   1875  C2  DCP A  59      13.984  16.066  -9.660  2.00  0.00           C  
ATOM   1876  O2  DCP A  59      13.533  15.529 -10.670  5.00  0.00           O  
ATOM   1877  N3  DCP A  59      13.697  17.372  -9.450  1.00  0.00           N  
ATOM   1878  C4  DCP A  59      14.148  18.027  -8.400  3.00  0.00           C  
ATOM   1879  N4  DCP A  59      13.839  19.301  -8.260  4.00  0.00           N  
ATOM   1880  C5  DCP A  59      14.936  17.365  -7.400  3.00  0.00           C  
ATOM   1881  C6  DCP A  59      15.213  16.041  -7.600  6.00  0.00           C  
ATOM   1882  OP1 DCP A  59      17.271  13.182  -4.000  5.00  0.00           O  
ATOM   1883  OP2 DCP A  59      15.732  15.228  -4.210  5.00  0.00           O  
ATOM   1884  H3  DCP A  59      13.093  17.817 -10.140  9.00  0.00           H  
ATOM   1885  H5  DCP A  59      15.289  17.852  -6.500  5.00  0.00           H  
ATOM   1886  H6  DCP A  59      15.768  15.484  -6.840  4.00  0.00           H  
ATOM   1887  H1' DCP A  59      14.940  13.722 -10.090  7.00  0.00           H  
ATOM   1888  H2' DCP A  59      17.218  14.476  -8.240  5.00  0.00           H  
ATOM   1889  H3' DCP A  59      17.718  12.321  -7.710  4.00  0.00           H  
ATOM   1890  H4' DCP A  59      15.221  11.092  -8.160  6.00  0.00           H  
ATOM   1891  H41 DCP A  59      13.203  19.740  -8.930  0.00  0.00           H  
ATOM   1892  H5' DCP A  59      14.767  11.470  -5.870  8.00  0.00           H  
ATOM   1893  H42 DCP A  59      14.118  19.817  -7.440  7.00  0.00           H  
ATOM   1894 H2'' DCP A  59      17.232  13.936  -9.940  1.00  0.00           H  
ATOM   1895 H5'' DCP A  59      16.536  11.569  -5.930  2.00  0.00           H  
ATOM   1896  P   DCP A  60      18.661  11.223 -10.120  0.00  0.00           P  
ATOM   1897  C5' DCP A  60      18.091  12.264 -12.490  6.00  0.00           C  
ATOM   1898  O5' DCP A  60      18.795  12.366 -11.250  4.00  0.00           O  
ATOM   1899  C4' DCP A  60      18.521  13.303 -13.540  1.00  0.00           C  
ATOM   1900  O4' DCP A  60      18.218  14.639 -13.140  5.00  0.00           O  
ATOM   1901  C3' DCP A  60      20.019  13.315 -13.880  3.00  0.00           C  
ATOM   1902  O3' DCP A  60      20.379  12.338 -14.860  4.00  0.00           O  
ATOM   1903  C2' DCP A  60      20.162  14.742 -14.430  6.00  0.00           C  
ATOM   1904  C1' DCP A  60      18.853  15.482 -14.090  8.00  0.00           C  
ATOM   1905  N1  DCP A  60      19.015  16.879 -13.560  7.00  0.00           N  
ATOM   1906  C2  DCP A  60      18.282  17.931 -14.140  1.00  0.00           C  
ATOM   1907  O2  DCP A  60      17.578  17.779 -15.140  9.00  0.00           O  
ATOM   1908  N3  DCP A  60      18.319  19.166 -13.590  3.00  0.00           N  
ATOM   1909  C4  DCP A  60      19.053  19.422 -12.520  4.00  0.00           C  
ATOM   1910  N4  DCP A  60      19.016  20.639 -12.010  9.00  0.00           N  
ATOM   1911  C5  DCP A  60      19.820  18.393 -11.890  2.00  0.00           C  
ATOM   1912  C6  DCP A  60      19.782  17.145 -12.450  8.00  0.00           C  
ATOM   1913  OP1 DCP A  60      18.721   9.898 -10.780  9.00  0.00           O  
ATOM   1914  OP2 DCP A  60      19.643  11.521  -9.060  0.00  0.00           O  
ATOM   1915  H3  DCP A  60      17.768  19.894 -14.020  8.00  0.00           H  
ATOM   1916  H5  DCP A  60      20.444  18.560 -11.020  8.00  0.00           H  
ATOM   1917  H6  DCP A  60      20.364  16.331 -12.030  4.00  0.00           H  
ATOM   1918  H1' DCP A  60      18.224  15.509 -14.980  4.00  0.00           H  
ATOM   1919  H2' DCP A  60      21.035  15.223 -13.990  9.00  0.00           H  
ATOM   1920  H3' DCP A  60      20.598  13.196 -12.960  2.00  0.00           H  
ATOM   1921  H4' DCP A  60      17.977  13.081 -14.460  5.00  0.00           H  
ATOM   1922  H41 DCP A  60      18.420  21.363 -12.420  1.00  0.00           H  
ATOM   1923  H5' DCP A  60      17.021  12.376 -12.300  4.00  0.00           H  
ATOM   1924  H42 DCP A  60      19.596  20.861 -11.220  3.00  0.00           H  
ATOM   1925 H2'' DCP A  60      20.268  14.707 -15.520  3.00  0.00           H  
ATOM   1926 H5'' DCP A  60      18.255  11.273 -12.910  8.00  0.00           H  
ATOM   1927  P    DT A  61      21.863  11.685 -14.940  4.00  0.00           P  
ATOM   1928  C5'  DT A  61      23.103  13.446 -16.460  3.00  0.00           C  
ATOM   1929  O5'  DT A  61      22.807  12.974 -15.160  8.00  0.00           O  
ATOM   1930  C4'  DT A  61      23.951  14.722 -16.430  9.00  0.00           C  
ATOM   1931  O4'  DT A  61      24.631  14.866 -17.680  0.00  0.00           O  
ATOM   1932  C3'  DT A  61      23.167  16.028 -16.180  4.00  0.00           C  
ATOM   1933  O3'  DT A  61      23.851  16.778 -15.190  3.00  0.00           O  
ATOM   1934  C2'  DT A  61      23.228  16.673 -17.570  2.00  0.00           C  
ATOM   1935  C1'  DT A  61      24.634  16.249 -17.990  8.00  0.00           C  
ATOM   1936  N1   DT A  61      24.978  16.515 -19.410  1.00  0.00           N  
ATOM   1937  C2   DT A  61      26.198  17.155 -19.680  2.00  0.00           C  
ATOM   1938  O2   DT A  61      27.071  17.392 -18.840  3.00  0.00           O  
ATOM   1939  N3   DT A  61      26.451  17.479 -20.990  9.00  0.00           N  
ATOM   1940  C4   DT A  61      25.692  17.111 -22.070  6.00  0.00           C  
ATOM   1941  O4   DT A  61      26.121  17.374 -23.190  7.00  0.00           O  
ATOM   1942  C5   DT A  61      24.454  16.403 -21.740  2.00  0.00           C  
ATOM   1943  C6   DT A  61      24.133  16.145 -20.440  4.00  0.00           C  
ATOM   1944  C7   DT A  61      23.494  15.978 -22.840  2.00  0.00           C  
ATOM   1945  OP1  DT A  61      21.967  10.871 -16.170  6.00  0.00           O  
ATOM   1946  OP2  DT A  61      22.198  11.043 -13.650  9.00  0.00           O1-
ATOM   1947  H3   DT A  61      27.251  18.049 -21.160  4.00  0.00           H  
ATOM   1948  H6   DT A  61      23.217  15.620 -20.210  3.00  0.00           H  
ATOM   1949  H1'  DT A  61      25.350  16.760 -17.330  5.00  0.00           H  
ATOM   1950  H2'  DT A  61      22.468  16.234 -18.210  0.00  0.00           H  
ATOM   1951  H3'  DT A  61      22.141  15.836 -15.880  0.00  0.00           H  
ATOM   1952  H4'  DT A  61      24.690  14.614 -15.640  4.00  0.00           H  
ATOM   1953  H5'  DT A  61      22.175  13.638 -17.000  4.00  0.00           H  
ATOM   1954  H71  DT A  61      23.566  16.677 -23.670  3.00  0.00           H  
ATOM   1955  H72  DT A  61      22.465  15.983 -22.480  4.00  0.00           H  
ATOM   1956  H73  DT A  61      23.764  14.988 -23.210  6.00  0.00           H  
ATOM   1957 H2''  DT A  61      23.120  17.754 -17.540  5.00  0.00           H  
ATOM   1958 H5''  DT A  61      23.658  12.671 -16.990  5.00  0.00           H  
ATOM   1959  P    DA A  62      23.321  18.174 -14.590  2.00  0.00           P  
ATOM   1960  C5'  DA A  62      25.212  19.394 -15.920  4.00  0.00           C  
ATOM   1961  O5'  DA A  62      23.819  19.236 -15.680  9.00  0.00           O  
ATOM   1962  C4'  DA A  62      25.528  20.271 -17.130  3.00  0.00           C  
ATOM   1963  O4'  DA A  62      24.893  19.770 -18.310  8.00  0.00           O  
ATOM   1964  C3'  DA A  62      25.078  21.725 -16.930  4.00  0.00           C  
ATOM   1965  O3'  DA A  62      26.099  22.630 -17.320  3.00  0.00           O  
ATOM   1966  C2'  DA A  62      23.885  21.827 -17.880  4.00  0.00           C  
ATOM   1967  C1'  DA A  62      24.275  20.847 -18.990  4.00  0.00           C  
ATOM   1968  N1   DA A  62      22.617  19.265 -23.610  5.00  0.00           N  
ATOM   1969  C2   DA A  62      23.803  19.688 -23.200  3.00  0.00           C  
ATOM   1970  N3   DA A  62      24.154  20.086 -21.980  0.00  0.00           N  
ATOM   1971  C4   DA A  62      23.110  20.017 -21.100  0.00  0.00           C  
ATOM   1972  C5   DA A  62      21.835  19.601 -21.380  7.00  0.00           C  
ATOM   1973  C6   DA A  62      21.628  19.224 -22.720  0.00  0.00           C  
ATOM   1974  N6   DA A  62      20.482  18.782 -23.200  7.00  0.00           N  
ATOM   1975  N7   DA A  62      21.031  19.625 -20.230  5.00  0.00           N  
ATOM   1976  C8   DA A  62      21.850  20.047 -19.310  9.00  0.00           C  
ATOM   1977  N9   DA A  62      23.117  20.338 -19.760  6.00  0.00           N  
ATOM   1978  OP1  DA A  62      24.056  18.441 -13.340  1.00  0.00           O  
ATOM   1979  OP2  DA A  62      21.840  18.213 -14.590  8.00  0.00           O1-
ATOM   1980  H2   DA A  62      24.586  19.705 -23.940  2.00  0.00           H  
ATOM   1981  H8   DA A  62      21.554  20.154 -18.280  6.00  0.00           H  
ATOM   1982  H1'  DA A  62      24.996  21.326 -19.660  1.00  0.00           H  
ATOM   1983  H2'  DA A  62      22.990  21.497 -17.350  9.00  0.00           H  
ATOM   1984  H3'  DA A  62      24.767  21.910 -15.900  0.00  0.00           H  
ATOM   1985  H4'  DA A  62      26.608  20.261 -17.280  7.00  0.00           H  
ATOM   1986  H5'  DA A  62      25.670  18.419 -16.080  2.00  0.00           H  
ATOM   1987  H61  DA A  62      20.414  18.631 -24.190  6.00  0.00           H  
ATOM   1988  H62  DA A  62      19.677  18.770 -22.600  0.00  0.00           H  
ATOM   1989 H2''  DA A  62      23.755  22.839 -18.260  3.00  0.00           H  
ATOM   1990 H5''  DA A  62      25.679  19.835 -15.030  4.00  0.00           H  
ATOM   1991  P    DA A  63      27.304  23.013 -16.330  2.00  0.00           P  
ATOM   1992  C5'  DA A  63      27.326  24.693 -14.280  8.00  0.00           C  
ATOM   1993  O5'  DA A  63      26.613  24.111 -15.360  0.00  0.00           O  
ATOM   1994  C4'  DA A  63      26.601  25.878 -13.610  8.00  0.00           C  
ATOM   1995  O4'  DA A  63      26.243  26.829 -14.610  5.00  0.00           O  
ATOM   1996  C3'  DA A  63      25.332  25.483 -12.840  2.00  0.00           C  
ATOM   1997  O3'  DA A  63      25.202  26.246 -11.640  3.00  0.00           O  
ATOM   1998  C2'  DA A  63      24.251  25.804 -13.860  2.00  0.00           C  
ATOM   1999  C1'  DA A  63      24.837  26.998 -14.620  4.00  0.00           C  
ATOM   2000  N1   DA A  63      23.653  30.309 -18.370  5.00  0.00           N  
ATOM   2001  C2   DA A  63      24.201  30.473 -17.180  2.00  0.00           C  
ATOM   2002  N3   DA A  63      24.493  29.547 -16.280  9.00  0.00           N  
ATOM   2003  C4   DA A  63      24.197  28.288 -16.720  4.00  0.00           C  
ATOM   2004  C5   DA A  63      23.661  27.950 -17.930  6.00  0.00           C  
ATOM   2005  C6   DA A  63      23.359  29.063 -18.750  6.00  0.00           C  
ATOM   2006  N6   DA A  63      22.792  29.007 -19.940  8.00  0.00           N  
ATOM   2007  N7   DA A  63      23.545  26.559 -18.060  6.00  0.00           N  
ATOM   2008  C8   DA A  63      23.975  26.120 -16.910  1.00  0.00           C  
ATOM   2009  N9   DA A  63      24.351  27.110 -16.020  0.00  0.00           N  
ATOM   2010  OP1  DA A  63      28.360  23.655 -17.140  7.00  0.00           O  
ATOM   2011  OP2  DA A  63      27.662  21.821 -15.530  5.00  0.00           O1-
ATOM   2012  H2   DA A  63      24.431  31.490 -16.890  9.00  0.00           H  
ATOM   2013  H8   DA A  63      24.029  25.065 -16.670  5.00  0.00           H  
ATOM   2014  H1'  DA A  63      24.601  27.913 -14.070  5.00  0.00           H  
ATOM   2015  H2'  DA A  63      24.116  24.939 -14.510  7.00  0.00           H  
ATOM   2016  H3'  DA A  63      25.347  24.416 -12.620  0.00  0.00           H  
ATOM   2017  H4'  DA A  63      27.282  26.347 -12.900  6.00  0.00           H  
ATOM   2018  H5'  DA A  63      28.293  25.047 -14.630  1.00  0.00           H  
ATOM   2019  H61  DA A  63      22.555  29.876 -20.370  6.00  0.00           H  
ATOM   2020  H62  DA A  63      22.582  28.104 -20.340  0.00  0.00           H  
ATOM   2021 H2''  DA A  63      23.317  26.070 -13.380  2.00  0.00           H  
ATOM   2022 H5''  DA A  63      27.502  23.927 -13.520  6.00  0.00           H  
ATOM   2023  P   DCP A  64      24.471  25.646 -10.330  9.00  0.00           P  
ATOM   2024  C5' DCP A  64      22.292  27.098 -10.730  0.00  0.00           C  
ATOM   2025  O5' DCP A  64      22.920  25.820 -10.730  1.00  0.00           O  
ATOM   2026  C4' DCP A  64      20.905  27.077 -11.400  8.00  0.00           C  
ATOM   2027  O4' DCP A  64      20.990  26.626 -12.750  3.00  0.00           O  
ATOM   2028  C3' DCP A  64      19.895  26.172 -10.690  8.00  0.00           C  
ATOM   2029  O3' DCP A  64      19.227  26.874  -9.650  2.00  0.00           O  
ATOM   2030  C2' DCP A  64      18.944  25.842 -11.840  4.00  0.00           C  
ATOM   2031  C1' DCP A  64      19.818  25.899 -13.100  3.00  0.00           C  
ATOM   2032  N1  DCP A  64      20.180  24.536 -13.620  7.00  0.00           N  
ATOM   2033  C2  DCP A  64      19.445  23.984 -14.690  3.00  0.00           C  
ATOM   2034  O2  DCP A  64      18.523  24.584 -15.230  3.00  0.00           O  
ATOM   2035  N3  DCP A  64      19.744  22.740 -15.130  4.00  0.00           N  
ATOM   2036  C4  DCP A  64      20.711  22.021 -14.590  2.00  0.00           C  
ATOM   2037  N4  DCP A  64      20.904  20.807 -15.050  6.00  0.00           N  
ATOM   2038  C5  DCP A  64      21.497  22.540 -13.510  8.00  0.00           C  
ATOM   2039  C6  DCP A  64      21.205  23.798 -13.060  5.00  0.00           C  
ATOM   2040  OP1 DCP A  64      24.773  26.499  -9.160  3.00  0.00           O  
ATOM   2041  OP2 DCP A  64      24.743  24.193 -10.250  6.00  0.00           O  
ATOM   2042  H3  DCP A  64      19.194  22.373 -15.900  7.00  0.00           H  
ATOM   2043  H5  DCP A  64      22.315  21.979 -13.070  5.00  0.00           H  
ATOM   2044  H6  DCP A  64      21.790  24.247 -12.250  5.00  0.00           H  
ATOM   2045  H1' DCP A  64      19.282  26.447 -13.890  9.00  0.00           H  
ATOM   2046  H2' DCP A  64      18.476  24.868 -11.690  1.00  0.00           H  
ATOM   2047  H3' DCP A  64      20.403  25.279 -10.320  2.00  0.00           H  
ATOM   2048  H4' DCP A  64      20.499  28.091 -11.390  8.00  0.00           H  
ATOM   2049  H41 DCP A  64      20.363  20.455 -15.840  2.00  0.00           H  
ATOM   2050  H5' DCP A  64      22.926  27.813 -11.250  6.00  0.00           H  
ATOM   2051  H42 DCP A  64      21.581  20.142 -14.660  2.00  0.00           H  
ATOM   2052 H2'' DCP A  64      18.173  26.612 -11.900  1.00  0.00           H  
ATOM   2053 H5'' DCP A  64      22.182  27.438  -9.700  5.00  0.00           H  
ATOM   2054  P   DCP A  65      18.584  26.120  -8.370  1.00  0.00           P  
ATOM   2055  C5' DCP A  65      16.034  26.343  -9.100  3.00  0.00           C  
ATOM   2056  O5' DCP A  65      17.181  25.518  -8.900  2.00  0.00           O  
ATOM   2057  C4' DCP A  65      14.782  25.523  -9.440  0.00  0.00           C  
ATOM   2058  O4' DCP A  65      15.077  24.636 -10.510  5.00  0.00           O  
ATOM   2059  C3' DCP A  65      14.271  24.629  -8.310  8.00  0.00           C  
ATOM   2060  O3' DCP A  65      13.517  25.357  -7.350  1.00  0.00           O  
ATOM   2061  C2' DCP A  65      13.433  23.646  -9.130  3.00  0.00           C  
ATOM   2062  C1' DCP A  65      14.165  23.551 -10.470  7.00  0.00           C  
ATOM   2063  N1  DCP A  65      14.945  22.292 -10.610  3.00  0.00           N  
ATOM   2064  C2  DCP A  65      14.551  21.326 -11.550  7.00  0.00           C  
ATOM   2065  O2  DCP A  65      13.702  21.537 -12.410  7.00  0.00           O  
ATOM   2066  N3  DCP A  65      15.127  20.103 -11.510  3.00  0.00           N  
ATOM   2067  C4  DCP A  65      16.070  19.802 -10.640  6.00  0.00           C  
ATOM   2068  N4  DCP A  65      16.538  18.571 -10.620  7.00  0.00           N  
ATOM   2069  C5  DCP A  65      16.576  20.782  -9.730  6.00  0.00           C  
ATOM   2070  C6  DCP A  65      15.998  22.020  -9.760  4.00  0.00           C  
ATOM   2071  OP1 DCP A  65      18.307  27.141  -7.330  1.00  0.00           O  
ATOM   2072  OP2 DCP A  65      19.446  24.965  -8.050  8.00  0.00           O  
ATOM   2073  H3  DCP A  65      14.788  19.422 -12.180  0.00  0.00           H  
ATOM   2074  H5  DCP A  65      17.386  20.589  -9.040  6.00  0.00           H  
ATOM   2075  H6  DCP A  65      16.350  22.825  -9.110  2.00  0.00           H  
ATOM   2076  H1' DCP A  65      13.424  23.649 -11.280  2.00  0.00           H  
ATOM   2077  H2' DCP A  65      13.326  22.685  -8.630  2.00  0.00           H  
ATOM   2078  H3' DCP A  65      15.109  24.129  -7.820  0.00  0.00           H  
ATOM   2079  H4' DCP A  65      13.968  26.191  -9.740  6.00  0.00           H  
ATOM   2080  H41 DCP A  65      16.178  17.891 -11.300  1.00  0.00           H  
ATOM   2081  H5' DCP A  65      16.227  27.051  -9.900  8.00  0.00           H  
ATOM   2082  H42 DCP A  65      17.239  18.293  -9.960  1.00  0.00           H  
ATOM   2083 H2'' DCP A  65      12.446  24.068  -9.320  9.00  0.00           H  
ATOM   2084 H5'' DCP A  65      15.830  26.904  -8.180  6.00  0.00           H  
ATOM   2085  P   DCP A  66      12.981  24.698  -5.980  9.00  0.00           P  
ATOM   2086  C5' DCP A  66      10.614  24.282  -7.170  2.00  0.00           C  
ATOM   2087  O5' DCP A  66      11.731  23.763  -6.430  1.00  0.00           O  
ATOM   2088  C4' DCP A  66       9.633  23.208  -7.680  5.00  0.00           C  
ATOM   2089  O4' DCP A  66      10.286  22.056  -8.230  6.00  0.00           O  
ATOM   2090  C3' DCP A  66       8.738  22.651  -6.570  7.00  0.00           C  
ATOM   2091  O3' DCP A  66       7.717  23.576  -6.230  0.00  0.00           O  
ATOM   2092  C2' DCP A  66       8.210  21.406  -7.290  7.00  0.00           C  
ATOM   2093  C1' DCP A  66       9.380  20.958  -8.170  3.00  0.00           C  
ATOM   2094  N1  DCP A  66      10.087  19.758  -7.630  8.00  0.00           N  
ATOM   2095  C2  DCP A  66       9.919  18.521  -8.270  9.00  0.00           C  
ATOM   2096  O2  DCP A  66       9.210  18.389  -9.270  7.00  0.00           O  
ATOM   2097  N3  DCP A  66      10.566  17.433  -7.800  9.00  0.00           N  
ATOM   2098  C4  DCP A  66      11.351  17.495  -6.740  1.00  0.00           C  
ATOM   2099  N4  DCP A  66      11.993  16.400  -6.380  7.00  0.00           N  
ATOM   2100  C5  DCP A  66      11.576  18.737  -6.060  6.00  0.00           C  
ATOM   2101  C6  DCP A  66      10.922  19.842  -6.540  0.00  0.00           C  
ATOM   2102  OP1 DCP A  66      12.554  25.804  -5.080  5.00  0.00           O  
ATOM   2103  OP2 DCP A  66      14.046  23.795  -5.480  2.00  0.00           O  
ATOM   2104  H3  DCP A  66      10.392  16.558  -8.280  5.00  0.00           H  
ATOM   2105  H5  DCP A  66      12.230  18.831  -5.200  1.00  0.00           H  
ATOM   2106  H6  DCP A  66      11.051  20.822  -6.080  8.00  0.00           H  
ATOM   2107  H1' DCP A  66       8.982  20.742  -9.170  8.00  0.00           H  
ATOM   2108  H2' DCP A  66       7.906  20.637  -6.580  7.00  0.00           H  
ATOM   2109  H3' DCP A  66       9.352  22.389  -5.720  1.00  0.00           H  
ATOM   2110  H4' DCP A  66       8.989  23.660  -8.440  7.00  0.00           H  
ATOM   2111  H41 DCP A  66      11.844  15.546  -6.930  2.00  0.00           H  
ATOM   2112  H5' DCP A  66      10.961  24.848  -8.030  5.00  0.00           H  
ATOM   2113  H42 DCP A  66      12.688  16.414  -5.650  2.00  0.00           H  
ATOM   2114 H2'' DCP A  66       7.366  21.675  -7.930  5.00  0.00           H  
ATOM   2115 H5'' DCP A  66      10.053  24.977  -6.550  1.00  0.00           H  
ATOM   2116  P    DT A  67       7.218  23.852  -4.710  6.00  0.00           P  
ATOM   2117  C5'  DT A  67       6.053  21.503  -4.310  2.00  0.00           C  
ATOM   2118  O5'  DT A  67       5.932  22.899  -4.530  5.00  0.00           O  
ATOM   2119  C4'  DT A  67       5.063  20.690  -5.160  5.00  0.00           C  
ATOM   2120  O4'  DT A  67       5.428  19.317  -4.980  6.00  0.00           O  
ATOM   2121  C3'  DT A  67       3.586  20.852  -4.740  8.00  0.00           C  
ATOM   2122  O3'  DT A  67       2.717  20.897  -5.870  0.00  0.00           O  
ATOM   2123  C2'  DT A  67       3.399  19.576  -3.910  2.00  0.00           C  
ATOM   2124  C1'  DT A  67       4.256  18.573  -4.690  2.00  0.00           C  
ATOM   2125  N1   DT A  67       4.642  17.306  -3.980  9.00  0.00           N  
ATOM   2126  C2   DT A  67       4.553  16.105  -4.700  0.00  0.00           C  
ATOM   2127  O2   DT A  67       4.096  16.000  -5.830  8.00  0.00           O  
ATOM   2128  N3   DT A  67       5.099  14.977  -4.140  9.00  0.00           N  
ATOM   2129  C4   DT A  67       5.781  14.923  -2.940  1.00  0.00           C  
ATOM   2130  O4   DT A  67       6.348  13.874  -2.620  4.00  0.00           O  
ATOM   2131  C5   DT A  67       5.802  16.188  -2.210  9.00  0.00           C  
ATOM   2132  C6   DT A  67       5.240  17.317  -2.730  5.00  0.00           C  
ATOM   2133  C7   DT A  67       6.515  16.253  -0.860  3.00  0.00           C  
ATOM   2134  OP1  DT A  67       6.761  25.255  -4.600  4.00  0.00           O  
ATOM   2135  OP2  DT A  67       8.250  23.385  -3.750  8.00  0.00           O1-
ATOM   2136  H3   DT A  67       4.979  14.130  -4.660  1.00  0.00           H  
ATOM   2137  H6   DT A  67       5.286  18.250  -2.180  9.00  0.00           H  
ATOM   2138  H1'  DT A  67       3.728  18.342  -5.630  7.00  0.00           H  
ATOM   2139  H2'  DT A  67       3.780  19.733  -2.900  9.00  0.00           H  
ATOM   2140  H3'  DT A  67       3.456  21.756  -4.140  1.00  0.00           H  
ATOM   2141  H4'  DT A  67       5.165  20.986  -6.210  2.00  0.00           H  
ATOM   2142  H5'  DT A  67       5.879  21.295  -3.260  0.00  0.00           H  
ATOM   2143  H71  DT A  67       5.964  15.662  -0.130  7.00  0.00           H  
ATOM   2144  H72  DT A  67       6.600  17.280  -0.510  2.00  0.00           H  
ATOM   2145  H73  DT A  67       7.509  15.817  -0.960  7.00  0.00           H  
ATOM   2146 H2''  DT A  67       2.354  19.275  -3.880  3.00  0.00           H  
ATOM   2147 H5''  DT A  67       7.064  21.182  -4.560  1.00  0.00           H  
ATOM   2148  P    DA A  68       1.166  21.389  -5.790  5.00  0.00           P  
ATOM   2149  C5'  DA A  68       0.324  19.024  -6.500  8.00  0.00           C  
ATOM   2150  O5'  DA A  68       0.423  20.002  -5.470  8.00  0.00           O  
ATOM   2151  C4'  DA A  68       0.071  17.598  -5.990  0.00  0.00           C  
ATOM   2152  O4'  DA A  68       1.006  17.296  -4.960  4.00  0.00           O  
ATOM   2153  C3'  DA A  68      -1.339  17.346  -5.420  4.00  0.00           C  
ATOM   2154  O3'  DA A  68      -1.784  16.000  -5.610  1.00  0.00           O  
ATOM   2155  C2'  DA A  68      -1.058  17.486  -3.930  2.00  0.00           C  
ATOM   2156  C1'  DA A  68       0.274  16.736  -3.890  5.00  0.00           C  
ATOM   2157  N1   DA A  68       3.276  14.109  -0.670  8.00  0.00           N  
ATOM   2158  C2   DA A  68       2.748  13.814  -1.850  3.00  0.00           C  
ATOM   2159  N3   DA A  68       1.981  14.573  -2.610  1.00  0.00           N  
ATOM   2160  C4   DA A  68       1.758  15.805  -2.070  8.00  0.00           C  
ATOM   2161  C5   DA A  68       2.213  16.262  -0.870  0.00  0.00           C  
ATOM   2162  C6   DA A  68       3.005  15.320  -0.170  8.00  0.00           C  
ATOM   2163  N6   DA A  68       3.532  15.521   1.010  6.00  0.00           N  
ATOM   2164  N7   DA A  68       1.776  17.573  -0.630  0.00  0.00           N  
ATOM   2165  C8   DA A  68       1.072  17.853  -1.700  8.00  0.00           C  
ATOM   2166  N9   DA A  68       1.007  16.824  -2.610  2.00  0.00           N  
ATOM   2167  OP1  DA A  68       0.720  21.805  -7.140  5.00  0.00           O  
ATOM   2168  OP2  DA A  68       0.979  22.288  -4.620  2.00  0.00           O1-
ATOM   2169  H2   DA A  68       2.969  12.830  -2.240  9.00  0.00           H  
ATOM   2170  H8   DA A  68       0.580  18.807  -1.860  4.00  0.00           H  
ATOM   2171  H1'  DA A  68       0.093  15.682  -4.120  2.00  0.00           H  
ATOM   2172  H2'  DA A  68      -0.941  18.536  -3.650  5.00  0.00           H  
ATOM   2173  H3'  DA A  68      -2.072  18.082  -5.760  9.00  0.00           H  
ATOM   2174  H4'  DA A  68       0.236  16.924  -6.830  4.00  0.00           H  
ATOM   2175  H5'  DA A  68       1.265  19.012  -7.040  5.00  0.00           H  
ATOM   2176  H61  DA A  68       4.126  14.815   1.390  5.00  0.00           H  
ATOM   2177  H62  DA A  68       3.268  16.367   1.500  5.00  0.00           H  
ATOM   2178 H2''  DA A  68      -1.826  16.996  -3.330  8.00  0.00           H  
ATOM   2179 H5''  DA A  68      -0.464  19.311  -7.190  8.00  0.00           H  
ATOM   2180  P    DA A  69      -2.868  15.580  -6.720  9.00  0.00           P  
ATOM   2181  C5'  DA A  69      -1.048  15.070  -8.540  5.00  0.00           C  
ATOM   2182  O5'  DA A  69      -2.124  15.893  -8.110  6.00  0.00           O  
ATOM   2183  C4'  DA A  69      -0.592  15.299  -9.980  7.00  0.00           C  
ATOM   2184  O4'  DA A  69      -1.638  14.942 -10.880  7.00  0.00           O  
ATOM   2185  C3'  DA A  69      -0.166  16.737 -10.320  4.00  0.00           C  
ATOM   2186  O3'  DA A  69       0.841  16.763 -11.330  0.00  0.00           O  
ATOM   2187  C2'  DA A  69      -1.460  17.306 -10.890  1.00  0.00           C  
ATOM   2188  C1'  DA A  69      -1.981  16.083 -11.650  8.00  0.00           C  
ATOM   2189  N1   DA A  69      -5.683  15.336 -15.120  5.00  0.00           N  
ATOM   2190  C2   DA A  69      -4.364  15.347 -15.220  8.00  0.00           C  
ATOM   2191  N3   DA A  69      -3.470  15.582 -14.270  6.00  0.00           N  
ATOM   2192  C4   DA A  69      -4.067  15.827 -13.060  5.00  0.00           C  
ATOM   2193  C5   DA A  69      -5.409  15.853 -12.800  4.00  0.00           C  
ATOM   2194  C6   DA A  69      -6.218  15.608 -13.930  1.00  0.00           C  
ATOM   2195  N6   DA A  69      -7.534  15.636 -13.950  2.00  0.00           N  
ATOM   2196  N7   DA A  69      -5.655  16.113 -11.450  1.00  0.00           N  
ATOM   2197  C8   DA A  69      -4.454  16.244 -10.940  9.00  0.00           C  
ATOM   2198  N9   DA A  69      -3.443  16.085 -11.860  2.00  0.00           N  
ATOM   2199  OP1  DA A  69      -4.034  16.466  -6.560  2.00  0.00           O  
ATOM   2200  OP2  DA A  69      -3.038  14.110  -6.590  8.00  0.00           O1-
ATOM   2201  H2   DA A  69      -3.964  15.137 -16.210  1.00  0.00           H  
ATOM   2202  H8   DA A  69      -4.267  16.440  -9.890  2.00  0.00           H  
ATOM   2203  H1'  DA A  69      -1.463  16.027 -12.610  1.00  0.00           H  
ATOM   2204  H2'  DA A  69      -2.135  17.600 -10.080  6.00  0.00           H  
ATOM   2205  H3'  DA A  69       0.146  17.285  -9.430  1.00  0.00           H  
ATOM   2206  H4'  DA A  69       0.253  14.637 -10.160  6.00  0.00           H  
ATOM   2207  H5'  DA A  69      -1.354  14.028  -8.450  9.00  0.00           H  
ATOM   2208  H61  DA A  69      -7.979  15.548 -14.840  3.00  0.00           H  
ATOM   2209  H62  DA A  69      -8.001  15.975 -13.120  3.00  0.00           H  
ATOM   2210 H2''  DA A  69      -1.269  18.148 -11.550  2.00  0.00           H  
ATOM   2211 H5''  DA A  69      -0.195  15.215  -7.880  4.00  0.00           H  
ATOM   2212  P    DC A  70       2.392  16.457 -11.010  3.00  0.00           P  
ATOM   2213  C5'  DC A  70       2.586  18.624  -9.460  0.00  0.00           C  
ATOM   2214  O5'  DC A  70       3.044  17.866 -10.580  3.00  0.00           O  
ATOM   2215  C4'  DC A  70       3.652  19.563  -8.850  8.00  0.00           C  
ATOM   2216  O4'  DC A  70       4.442  18.806  -7.950  5.00  0.00           O  
ATOM   2217  C3'  DC A  70       4.617  20.188  -9.870  7.00  0.00           C  
ATOM   2218  O3'  DC A  70       5.147  21.436  -9.450  2.00  0.00           O  
ATOM   2219  C2'  DC A  70       5.750  19.162  -9.880  1.00  0.00           C  
ATOM   2220  C1'  DC A  70       5.775  18.741  -8.400  1.00  0.00           C  
ATOM   2221  N1   DC A  70       6.245  17.358  -8.110  0.00  0.00           N  
ATOM   2222  C2   DC A  70       7.159  17.141  -7.060  3.00  0.00           C  
ATOM   2223  O2   DC A  70       7.718  18.045  -6.440  0.00  0.00           O  
ATOM   2224  N3   DC A  70       7.540  15.892  -6.700  8.00  0.00           N  
ATOM   2225  C4   DC A  70       6.995  14.882  -7.340  5.00  0.00           C  
ATOM   2226  N4   DC A  70       7.422  13.712  -6.960  4.00  0.00           N  
ATOM   2227  C5   DC A  70       6.048  15.016  -8.380  3.00  0.00           C  
ATOM   2228  C6   DC A  70       5.668  16.273  -8.720  9.00  0.00           C  
ATOM   2229  OP1  DC A  70       3.043  16.058 -12.280  0.00  0.00           O  
ATOM   2230  OP2  DC A  70       2.466  15.536  -9.860  4.00  0.00           O1-
ATOM   2231  H5   DC A  70       5.568  14.179  -8.860  6.00  0.00           H  
ATOM   2232  H6   DC A  70       4.875  16.429  -9.450  7.00  0.00           H  
ATOM   2233  H1'  DC A  70       6.345  19.484  -7.840  9.00  0.00           H  
ATOM   2234  H2'  DC A  70       5.498  18.334 -10.540  2.00  0.00           H  
ATOM   2235  H3'  DC A  70       4.140  20.278 -10.850  4.00  0.00           H  
ATOM   2236  H4'  DC A  70       3.146  20.362  -8.300  8.00  0.00           H  
ATOM   2237  H41  DC A  70       8.101  13.686  -6.220  7.00  0.00           H  
ATOM   2238  H5'  DC A  70       2.271  17.937  -8.670  0.00  0.00           H  
ATOM   2239  H42  DC A  70       7.126  12.915  -7.490  3.00  0.00           H  
ATOM   2240 H2''  DC A  70       6.688  19.620 -10.190  1.00  0.00           H  
ATOM   2241 H5''  DC A  70       1.722  19.219  -9.760  2.00  0.00           H  
ATOM   2242  P    DC A  71       5.079  22.737 -10.400  2.00  0.00           P  
ATOM   2243  C5'  DC A  71       6.955  23.080 -12.230  6.00  0.00           C  
ATOM   2244  O5'  DC A  71       5.937  22.263 -11.680  0.00  0.00           O  
ATOM   2245  C4'  DC A  71       8.259  22.950 -11.440  1.00  0.00           C  
ATOM   2246  O4'  DC A  71       8.668  21.591 -11.360  7.00  0.00           O  
ATOM   2247  C3'  DC A  71       9.434  23.702 -12.080  3.00  0.00           C  
ATOM   2248  O3'  DC A  71      10.113  24.406 -11.050  8.00  0.00           O  
ATOM   2249  C2'  DC A  71      10.325  22.580 -12.610  9.00  0.00           C  
ATOM   2250  C1'  DC A  71      10.067  21.538 -11.520  2.00  0.00           C  
ATOM   2251  N1   DC A  71      10.429  20.135 -11.860  4.00  0.00           N  
ATOM   2252  C2   DC A  71      11.439  19.488 -11.140  0.00  0.00           C  
ATOM   2253  O2   DC A  71      12.121  20.043 -10.270  5.00  0.00           O  
ATOM   2254  N3   DC A  71      11.723  18.183 -11.350  3.00  0.00           N  
ATOM   2255  C4   DC A  71      10.988  17.518 -12.210  7.00  0.00           C  
ATOM   2256  N4   DC A  71      11.316  16.270 -12.380  0.00  0.00           N  
ATOM   2257  C5   DC A  71       9.933  18.101 -12.970  9.00  0.00           C  
ATOM   2258  C6   DC A  71       9.673  19.417 -12.750  3.00  0.00           C  
ATOM   2259  OP1  DC A  71       5.823  23.840  -9.760  7.00  0.00           O  
ATOM   2260  OP2  DC A  71       3.709  22.950 -10.930  4.00  0.00           O1-
ATOM   2261  H5   DC A  71       9.327  17.535 -13.650  7.00  0.00           H  
ATOM   2262  H6   DC A  71       8.842  19.909 -13.250  9.00  0.00           H  
ATOM   2263  H1'  DC A  71      10.554  21.877 -10.600  8.00  0.00           H  
ATOM   2264  H2'  DC A  71       9.975  22.240 -13.580  2.00  0.00           H  
ATOM   2265  H3'  DC A  71       9.100  24.357 -12.880  2.00  0.00           H  
ATOM   2266  H4'  DC A  71       8.096  23.347 -10.440  1.00  0.00           H  
ATOM   2267  H41  DC A  71      12.055  15.902 -11.800  5.00  0.00           H  
ATOM   2268  H5'  DC A  71       6.629  24.123 -12.220  5.00  0.00           H  
ATOM   2269  H42  DC A  71      10.756  15.676 -12.960  8.00  0.00           H  
ATOM   2270 H2''  DC A  71      11.369  22.893 -12.640  9.00  0.00           H  
ATOM   2271 H5''  DC A  71       7.123  22.773 -13.260  0.00  0.00           H  
ATOM   2272  P    DC A  72      10.341  25.994 -11.120  6.00  0.00           P  
ATOM   2273  C5'  DC A  72      12.190  26.251 -12.950  4.00  0.00           C  
ATOM   2274  O5'  DC A  72      11.868  25.999 -11.610  3.00  0.00           O  
ATOM   2275  C4'  DC A  72      13.697  26.126 -13.160  4.00  0.00           C  
ATOM   2276  O4'  DC A  72      14.080  24.764 -13.240  7.00  0.00           O  
ATOM   2277  C3'  DC A  72      14.171  26.698 -14.490  7.00  0.00           C  
ATOM   2278  O3'  DC A  72      14.324  28.109 -14.420  6.00  0.00           O  
ATOM   2279  C2'  DC A  72      15.504  25.959 -14.650  8.00  0.00           C  
ATOM   2280  C1'  DC A  72      15.396  24.713 -13.750  8.00  0.00           C  
ATOM   2281  N1   DC A  72      15.540  23.404 -14.450  0.00  0.00           N  
ATOM   2282  C2   DC A  72      16.452  22.432 -14.000  1.00  0.00           C  
ATOM   2283  O2   DC A  72      17.227  22.607 -13.050  3.00  0.00           O  
ATOM   2284  N3   DC A  72      16.510  21.204 -14.580  9.00  0.00           N  
ATOM   2285  C4   DC A  72      15.666  20.945 -15.560  2.00  0.00           C  
ATOM   2286  N4   DC A  72      15.735  19.758 -16.080  3.00  0.00           N  
ATOM   2287  C5   DC A  72      14.708  21.870 -16.050  4.00  0.00           C  
ATOM   2288  C6   DC A  72      14.676  23.096 -15.470  4.00  0.00           C  
ATOM   2289  OP1  DC A  72      10.301  26.564  -9.760  0.00  0.00           O  
ATOM   2290  OP2  DC A  72       9.506  26.561 -12.210  3.00  0.00           O1-
ATOM   2291  H5   DC A  72      14.030  21.635 -16.850  9.00  0.00           H  
ATOM   2292  H6   DC A  72      13.961  23.847 -15.790  3.00  0.00           H  
ATOM   2293  H1'  DC A  72      16.105  24.798 -12.920  2.00  0.00           H  
ATOM   2294  H2'  DC A  72      15.657  25.705 -15.700  1.00  0.00           H  
ATOM   2295  H3'  DC A  72      13.464  26.411 -15.270  4.00  0.00           H  
ATOM   2296  H4'  DC A  72      14.214  26.622 -12.330  7.00  0.00           H  
ATOM   2297  H41  DC A  72      16.403  19.091 -15.720  7.00  0.00           H  
ATOM   2298  H5'  DC A  72      11.866  27.261 -13.210  6.00  0.00           H  
ATOM   2299  H42  DC A  72      15.080  19.497 -16.790  3.00  0.00           H  
ATOM   2300 H2''  DC A  72      16.325  26.589 -14.310  6.00  0.00           H  
ATOM   2301 H5''  DC A  72      11.673  25.535 -13.590  6.00  0.00           H  
ATOM   2302  P    DT A  73      14.289  29.048 -15.720  2.00  0.00           P  
ATOM   2303  C5'  DT A  73      16.924  29.427 -15.700  1.00  0.00           C  
ATOM   2304  O5'  DT A  73      15.781  28.832 -16.310  5.00  0.00           O  
ATOM   2305  C4'  DT A  73      17.374  30.697 -16.440  3.00  0.00           C  
ATOM   2306  O4'  DT A  73      18.513  31.251 -15.770  1.00  0.00           O  
ATOM   2307  C3'  DT A  73      17.817  30.425 -17.890  9.00  0.00           C  
ATOM   2308  O3'  DT A  73      17.702  31.565 -18.730  6.00  0.00           O  
ATOM   2309  C2'  DT A  73      19.300  30.095 -17.710  8.00  0.00           C  
ATOM   2310  C1'  DT A  73      19.686  31.012 -16.540  3.00  0.00           C  
ATOM   2311  N1   DT A  73      20.835  30.621 -15.660  1.00  0.00           N  
ATOM   2312  C2   DT A  73      20.909  29.338 -15.070  2.00  0.00           C  
ATOM   2313  O2   DT A  73      20.199  28.381 -15.350  7.00  0.00           O  
ATOM   2314  N3   DT A  73      21.867  29.143 -14.100  5.00  0.00           N  
ATOM   2315  C4   DT A  73      22.779  30.073 -13.670  6.00  0.00           C  
ATOM   2316  O4   DT A  73      23.588  29.750 -12.800  1.00  0.00           O  
ATOM   2317  C5   DT A  73      22.661  31.385 -14.300  4.00  0.00           C  
ATOM   2318  C6   DT A  73      21.713  31.613 -15.250  0.00  0.00           C  
ATOM   2319  C7   DT A  73      23.590  32.522 -13.900  6.00  0.00           C  
ATOM   2320  OP1  DT A  73      14.142  30.444 -15.240  7.00  0.00           O  
ATOM   2321  OP2  DT A  73      13.306  28.489 -16.680  3.00  0.00           O1-
ATOM   2322  H3   DT A  73      21.866  28.245 -13.650  9.00  0.00           H  
ATOM   2323  H6   DT A  73      21.636  32.598 -15.690  3.00  0.00           H  
ATOM   2324  H1'  DT A  73      19.933  31.965 -17.010  0.00  0.00           H  
ATOM   2325  H2'  DT A  73      19.421  29.039 -17.490  8.00  0.00           H  
ATOM   2326  H3'  DT A  73      17.280  29.569 -18.300  5.00  0.00           H  
ATOM   2327  H4'  DT A  73      16.539  31.401 -16.450  4.00  0.00           H  
ATOM   2328  H5'  DT A  73      17.738  28.705 -15.710  5.00  0.00           H  
ATOM   2329  H71  DT A  73      23.009  33.355 -13.500  3.00  0.00           H  
ATOM   2330  H72  DT A  73      24.272  32.184 -13.120  9.00  0.00           H  
ATOM   2331  H73  DT A  73      24.184  32.838 -14.750  5.00  0.00           H  
ATOM   2332 H2''  DT A  73      19.867  30.349 -18.610  9.00  0.00           H  
ATOM   2333 H5''  DT A  73      16.704  29.680 -14.660  6.00  0.00           H  
ATOM   2334  P    DA A  74      16.375  31.845 -19.620  4.00  0.00           P  
ATOM   2335  C5'  DA A  74      17.103  29.994 -21.320  9.00  0.00           C  
ATOM   2336  O5'  DA A  74      16.143  30.455 -20.390  9.00  0.00           O  
ATOM   2337  C4'  DA A  74      16.714  28.660 -21.960  8.00  0.00           C  
ATOM   2338  O4'  DA A  74      17.803  28.300 -22.810  4.00  0.00           O  
ATOM   2339  C3'  DA A  74      16.467  27.477 -21.000  1.00  0.00           C  
ATOM   2340  O3'  DA A  74      15.473  26.636 -21.590  6.00  0.00           O  
ATOM   2341  C2'  DA A  74      17.866  26.865 -20.970  1.00  0.00           C  
ATOM   2342  C1'  DA A  74      18.253  27.003 -22.450  5.00  0.00           C  
ATOM   2343  N1   DA A  74      21.761  26.167 -26.140  5.00  0.00           N  
ATOM   2344  C2   DA A  74      20.439  26.289 -26.170  9.00  0.00           C  
ATOM   2345  N3   DA A  74      19.603  26.524 -25.170  9.00  0.00           N  
ATOM   2346  C4   DA A  74      20.253  26.628 -23.970  4.00  0.00           C  
ATOM   2347  C5   DA A  74      21.603  26.548 -23.770  9.00  0.00           C  
ATOM   2348  C6   DA A  74      22.343  26.272 -24.940  8.00  0.00           C  
ATOM   2349  N6   DA A  74      23.651  26.104 -24.950  9.00  0.00           N  
ATOM   2350  N7   DA A  74      21.939  26.763 -22.420  9.00  0.00           N  
ATOM   2351  C8   DA A  74      20.768  26.909 -21.860  9.00  0.00           C  
ATOM   2352  N9   DA A  74      19.701  26.848 -22.730  6.00  0.00           N  
ATOM   2353  OP1  DA A  74      16.759  32.847 -20.630  7.00  0.00           O  
ATOM   2354  OP2  DA A  74      15.222  32.107 -18.740  6.00  0.00           O1-
ATOM   2355  H2   DA A  74      19.980  26.204 -27.140  6.00  0.00           H  
ATOM   2356  H8   DA A  74      20.649  27.059 -20.790  5.00  0.00           H  
ATOM   2357  H1'  DA A  74      17.704  26.255 -23.020  4.00  0.00           H  
ATOM   2358  H2'  DA A  74      18.511  27.463 -20.330  4.00  0.00           H  
ATOM   2359  H3'  DA A  74      16.153  27.813 -20.010  8.00  0.00           H  
ATOM   2360  H4'  DA A  74      15.815  28.816 -22.550  5.00  0.00           H  
ATOM   2361  H5'  DA A  74      18.064  29.890 -20.820  7.00  0.00           H  
ATOM   2362  H61  DA A  74      24.071  25.776 -25.800  9.00  0.00           H  
ATOM   2363  H62  DA A  74      24.102  26.069 -24.050  0.00  0.00           H  
ATOM   2364 H2''  DA A  74      17.860  25.827 -20.640  1.00  0.00           H  
ATOM   2365 H5''  DA A  74      17.201  30.740 -22.110  2.00  0.00           H  
ATOM   2366  P    DA A  75      15.042  25.191 -21.020  7.00  0.00           P  
ATOM   2367  C5'  DA A  75      16.093  24.015 -23.140  6.00  0.00           C  
ATOM   2368  O5'  DA A  75      16.103  24.212 -21.730  9.00  0.00           O  
ATOM   2369  C4'  DA A  75      17.164  23.034 -23.650  6.00  0.00           C  
ATOM   2370  O4'  DA A  75      18.474  23.541 -23.400  5.00  0.00           O  
ATOM   2371  C3'  DA A  75      17.074  21.641 -23.010  6.00  0.00           C  
ATOM   2372  O3'  DA A  75      17.364  20.603 -23.940  8.00  0.00           O  
ATOM   2373  C2'  DA A  75      18.190  21.720 -21.980  7.00  0.00           C  
ATOM   2374  C1'  DA A  75      19.231  22.527 -22.750  2.00  0.00           C  
ATOM   2375  N1   DA A  75      24.216  23.715 -22.370  8.00  0.00           N  
ATOM   2376  C2   DA A  75      23.508  23.102 -23.310  7.00  0.00           C  
ATOM   2377  N3   DA A  75      22.209  22.846 -23.320  1.00  0.00           N  
ATOM   2378  C4   DA A  75      21.593  23.259 -22.180  5.00  0.00           C  
ATOM   2379  C5   DA A  75      22.176  23.879 -21.110  9.00  0.00           C  
ATOM   2380  C6   DA A  75      23.568  24.097 -21.270  7.00  0.00           C  
ATOM   2381  N6   DA A  75      24.352  24.684 -20.380  4.00  0.00           N  
ATOM   2382  N7   DA A  75      21.226  24.167 -20.110  2.00  0.00           N  
ATOM   2383  C8   DA A  75      20.116  23.708 -20.630  5.00  0.00           C  
ATOM   2384  N9   DA A  75      20.259  23.138 -21.870  2.00  0.00           N  
ATOM   2385  OP1  DA A  75      13.686  24.875 -21.520  7.00  0.00           O  
ATOM   2386  OP2  DA A  75      15.285  25.129 -19.560  1.00  0.00           O1-
ATOM   2387  H2   DA A  75      24.055  22.790 -24.190  2.00  0.00           H  
ATOM   2388  H8   DA A  75      19.159  23.782 -20.130  5.00  0.00           H  
ATOM   2389  H1'  DA A  75      19.706  21.876 -23.490  4.00  0.00           H  
ATOM   2390  H2'  DA A  75      17.846  22.278 -21.120  9.00  0.00           H  
ATOM   2391  H3'  DA A  75      16.102  21.492 -22.540  8.00  0.00           H  
ATOM   2392  H4'  DA A  75      17.028  22.917 -24.730  5.00  0.00           H  
ATOM   2393  H5'  DA A  75      16.239  24.974 -23.630  7.00  0.00           H  
ATOM   2394  H61  DA A  75      25.339  24.681 -20.550  2.00  0.00           H  
ATOM   2395  H62  DA A  75      23.940  25.070 -19.540  4.00  0.00           H  
ATOM   2396 H2''  DA A  75      18.554  20.732 -21.700  8.00  0.00           H  
ATOM   2397 H5''  DA A  75      15.113  23.638 -23.420  3.00  0.00           H  
ATOM   2398  P    DC A  76      16.393  19.329 -24.080  6.00  0.00           P  
ATOM   2399  C5'  DC A  76      17.150  17.464 -22.360  1.00  0.00           C  
ATOM   2400  O5'  DC A  76      16.481  18.697 -22.600  7.00  0.00           O  
ATOM   2401  C4'  DC A  76      17.469  17.216 -20.880  4.00  0.00           C  
ATOM   2402  O4'  DC A  76      18.246  18.281 -20.350  9.00  0.00           O  
ATOM   2403  C3'  DC A  76      16.249  17.100 -19.970  6.00  0.00           C  
ATOM   2404  O3'  DC A  76      15.736  15.779 -19.980  7.00  0.00           O  
ATOM   2405  C2'  DC A  76      16.862  17.452 -18.620  1.00  0.00           C  
ATOM   2406  C1'  DC A  76      17.984  18.443 -18.970  3.00  0.00           C  
ATOM   2407  N1   DC A  76      17.647  19.875 -18.700  1.00  0.00           N  
ATOM   2408  C2   DC A  76      18.421  20.591 -17.780  0.00  0.00           C  
ATOM   2409  O2   DC A  76      19.329  20.065 -17.140  2.00  0.00           O  
ATOM   2410  N3   DC A  76      18.177  21.896 -17.500  9.00  0.00           N  
ATOM   2411  C4   DC A  76      17.183  22.485 -18.130  5.00  0.00           C  
ATOM   2412  N4   DC A  76      17.007  23.742 -17.850  2.00  0.00           N  
ATOM   2413  C5   DC A  76      16.340  21.812 -19.060  1.00  0.00           C  
ATOM   2414  C6   DC A  76      16.607  20.507 -19.330  5.00  0.00           C  
ATOM   2415  OP1  DC A  76      17.002  18.369 -25.030  8.00  0.00           O  
ATOM   2416  OP2  DC A  76      15.014  19.817 -24.310  9.00  0.00           O1-
ATOM   2417  H5   DC A  76      15.546  22.331 -19.580  7.00  0.00           H  
ATOM   2418  H6   DC A  76      16.038  19.962 -20.080  8.00  0.00           H  
ATOM   2419  H1'  DC A  76      18.882  18.171 -18.400  9.00  0.00           H  
ATOM   2420  H2'  DC A  76      16.112  17.866 -17.950  2.00  0.00           H  
ATOM   2421  H3'  DC A  76      15.498  17.831 -20.270  5.00  0.00           H  
ATOM   2422  H4'  DC A  76      18.037  16.289 -20.790  0.00  0.00           H  
ATOM   2423  H41  DC A  76      17.598  24.178 -17.170  6.00  0.00           H  
ATOM   2424  H5'  DC A  76      18.088  17.445 -22.910  9.00  0.00           H  
ATOM   2425  H42  DC A  76      16.312  24.278 -18.390  9.00  0.00           H  
ATOM   2426 H2''  DC A  76      17.295  16.558 -18.170  6.00  0.00           H  
ATOM   2427 H5''  DC A  76      16.522  16.652 -22.720  3.00  0.00           H  
ATOM   2428  P    DC A  77      14.271  15.442 -19.410  2.00  0.00           P  
ATOM   2429  C5'  DC A  77      15.273  13.828 -17.550  2.00  0.00           C  
ATOM   2430  O5'  DC A  77      14.540  15.001 -17.890  8.00  0.00           O  
ATOM   2431  C4'  DC A  77      15.134  13.448 -16.060  1.00  0.00           C  
ATOM   2432  O4'  DC A  77      15.664  14.479 -15.220  7.00  0.00           O  
ATOM   2433  C3'  DC A  77      13.690  13.174 -15.630  7.00  0.00           C  
ATOM   2434  O3'  DC A  77      13.384  11.796 -15.630  4.00  0.00           O  
ATOM   2435  C2'  DC A  77      13.673  13.710 -14.200  6.00  0.00           C  
ATOM   2436  C1'  DC A  77      14.750  14.795 -14.180  4.00  0.00           C  
ATOM   2437  N1   DC A  77      14.203  16.172 -14.370  0.00  0.00           N  
ATOM   2438  C2   DC A  77      14.594  17.180 -13.480  8.00  0.00           C  
ATOM   2439  O2   DC A  77      15.439  17.014 -12.600  6.00  0.00           O  
ATOM   2440  N3   DC A  77      14.052  18.419 -13.540  9.00  0.00           N  
ATOM   2441  C4   DC A  77      13.137  18.651 -14.460  7.00  0.00           C  
ATOM   2442  N4   DC A  77      12.611  19.840 -14.450  5.00  0.00           N  
ATOM   2443  C5   DC A  77      12.727  17.701 -15.430  5.00  0.00           C  
ATOM   2444  C6   DC A  77      13.293  16.471 -15.360  3.00  0.00           C  
ATOM   2445  OP1  DC A  77      13.770  14.283 -20.180  0.00  0.00           O  
ATOM   2446  OP2  DC A  77      13.490  16.698 -19.390  7.00  0.00           O1-
ATOM   2447  H5   DC A  77      12.007  17.914 -16.200  9.00  0.00           H  
ATOM   2448  H6   DC A  77      13.025  15.725 -16.100  0.00  0.00           H  
ATOM   2449  H1'  DC A  77      15.265  14.742 -13.220  8.00  0.00           H  
ATOM   2450  H2'  DC A  77      12.683  14.081 -13.930  4.00  0.00           H  
ATOM   2451  H3'  DC A  77      12.995  13.713 -16.270  3.00  0.00           H  
ATOM   2452  H4'  DC A  77      15.702  12.536 -15.880  7.00  0.00           H  
ATOM   2453  H41  DC A  77      12.941  20.491 -13.750  3.00  0.00           H  
ATOM   2454  H5'  DC A  77      16.328  13.994 -17.760  6.00  0.00           H  
ATOM   2455  H42  DC A  77      11.846  20.040 -15.060  9.00  0.00           H  
ATOM   2456 H2''  DC A  77      13.959  12.920 -13.510  5.00  0.00           H  
ATOM   2457 H5''  DC A  77      14.916  12.991 -18.150  8.00  0.00           H  
ATOM   2458  P    DC A  78      11.881  11.280 -15.370  9.00  0.00           P  
ATOM   2459  C5'  DC A  78      12.626  10.394 -12.990  2.00  0.00           C  
ATOM   2460  O5'  DC A  78      11.789  11.257 -13.760  1.00  0.00           O  
ATOM   2461  C4'  DC A  78      12.570  10.640 -11.470  0.00  0.00           C  
ATOM   2462  O4'  DC A  78      12.631  12.033 -11.140  5.00  0.00           O  
ATOM   2463  C3'  DC A  78      11.311  10.111 -10.790  2.00  0.00           C  
ATOM   2464  O3'  DC A  78      11.380   8.733 -10.510  8.00  0.00           O  
ATOM   2465  C2'  DC A  78      11.372  10.902  -9.490  7.00  0.00           C  
ATOM   2466  C1'  DC A  78      11.892  12.265  -9.950  6.00  0.00           C  
ATOM   2467  N1   DC A  78      10.792  13.245 -10.180  5.00  0.00           N  
ATOM   2468  C2   DC A  78      10.689  14.350  -9.330  5.00  0.00           C  
ATOM   2469  O2   DC A  78      11.455  14.547  -8.380  5.00  0.00           O  
ATOM   2470  N3   DC A  78       9.754  15.301  -9.530  8.00  0.00           N  
ATOM   2471  C4   DC A  78       8.894  15.139 -10.510  6.00  0.00           C  
ATOM   2472  N4   DC A  78       8.107  16.147 -10.730  7.00  0.00           N  
ATOM   2473  C5   DC A  78       8.909  14.024 -11.390  1.00  0.00           C  
ATOM   2474  C6   DC A  78       9.888  13.099 -11.210  5.00  0.00           C  
ATOM   2475  OP1  DC A  78      11.838   9.902 -15.900  9.00  0.00           O  
ATOM   2476  OP2  DC A  78      10.956  12.320 -15.880  2.00  0.00           O1-
ATOM   2477  H5   DC A  78       8.200  13.909 -12.200  0.00  0.00           H  
ATOM   2478  H6   DC A  78       9.978  12.258 -11.890  7.00  0.00           H  
ATOM   2479  H1'  DC A  78      12.559  12.653  -9.180  2.00  0.00           H  
ATOM   2480  H2'  DC A  78      10.399  10.950  -9.000  3.00  0.00           H  
ATOM   2481  H3'  DC A  78      10.427  10.345 -11.380  3.00  0.00           H  
ATOM   2482  H4'  DC A  78      13.421  10.132 -11.020  2.00  0.00           H  
ATOM   2483  H41  DC A  78       8.233  16.957 -10.140  7.00  0.00           H  
ATOM   2484  H5'  DC A  78      13.658  10.532 -13.310  7.00  0.00           H  
ATOM   2485  H42  DC A  78       7.355  16.078 -11.390  6.00  0.00           H  
ATOM   2486 H2''  DC A  78      12.101  10.445  -8.820  9.00  0.00           H  
ATOM   2487 H5''  DC A  78      12.349   9.355 -13.190  4.00  0.00           H  
ATOM   2488  P    DT A  79      10.037   7.885 -10.270  0.00  0.00           P  
ATOM   2489  C5'  DT A  79      11.499   5.846  -9.460  4.00  0.00           C  
ATOM   2490  O5'  DT A  79      10.592   6.382 -10.420  8.00  0.00           O  
ATOM   2491  C4'  DT A  79      11.868   4.362  -9.670  4.00  0.00           C  
ATOM   2492  O4'  DT A  79      10.658   3.611  -9.660  0.00  0.00           O  
ATOM   2493  C3'  DT A  79      12.635   4.031 -10.970  6.00  0.00           C  
ATOM   2494  O3'  DT A  79      13.649   3.046 -10.740  1.00  0.00           O  
ATOM   2495  C2'  DT A  79      11.499   3.520 -11.850  4.00  0.00           C  
ATOM   2496  C1'  DT A  79      10.580   2.828 -10.840  1.00  0.00           C  
ATOM   2497  N1   DT A  79       9.164   2.760 -11.300  0.00  0.00           N  
ATOM   2498  C2   DT A  79       8.527   1.510 -11.350  9.00  0.00           C  
ATOM   2499  O2   DT A  79       9.048   0.437 -11.060  6.00  0.00           O  
ATOM   2500  N3   DT A  79       7.215   1.505 -11.770  2.00  0.00           N  
ATOM   2501  C4   DT A  79       6.479   2.604 -12.140  8.00  0.00           C  
ATOM   2502  O4   DT A  79       5.294   2.441 -12.410  6.00  0.00           O  
ATOM   2503  C5   DT A  79       7.220   3.864 -12.150  8.00  0.00           C  
ATOM   2504  C6   DT A  79       8.504   3.907 -11.700  6.00  0.00           C  
ATOM   2505  C7   DT A  79       6.578   5.136 -12.680  1.00  0.00           C  
ATOM   2506  OP1  DT A  79       9.594   8.122  -8.880  5.00  0.00           O  
ATOM   2507  OP2  DT A  79       9.110   8.180 -11.390  3.00  0.00           O1-
ATOM   2508  H3   DT A  79       6.767   0.618 -11.850  1.00  0.00           H  
ATOM   2509  H6   DT A  79       9.023   4.857 -11.660  0.00  0.00           H  
ATOM   2510  H1'  DT A  79      10.973   1.829 -10.620  2.00  0.00           H  
ATOM   2511  H2'  DT A  79      11.016   4.374 -12.320  7.00  0.00           H  
ATOM   2512  H3'  DT A  79      13.079   4.934 -11.390  3.00  0.00           H  
ATOM   2513  H4'  DT A  79      12.488   4.046  -8.830  5.00  0.00           H  
ATOM   2514  H5'  DT A  79      11.045   5.941  -8.470  6.00  0.00           H  
ATOM   2515  H71  DT A  79       6.198   4.944 -13.680  4.00  0.00           H  
ATOM   2516  H72  DT A  79       5.743   5.421 -12.040  2.00  0.00           H  
ATOM   2517  H73  DT A  79       7.306   5.947 -12.720  4.00  0.00           H  
ATOM   2518 H2''  DT A  79      11.840   2.823 -12.610  8.00  0.00           H  
ATOM   2519 H5''  DT A  79      12.414   6.437  -9.470  3.00  0.00           H  
ATOM   2520  P    DA A  80      14.769   2.649 -11.850  8.00  0.00           P  
ATOM   2521  C5'  DA A  80      13.776   0.221 -12.230  9.00  0.00           C  
ATOM   2522  O5'  DA A  80      14.021   1.532 -12.740  7.00  0.00           O  
ATOM   2523  C4'  DA A  80      12.989  -0.678 -13.200  2.00  0.00           C  
ATOM   2524  O4'  DA A  80      11.660  -0.174 -13.360  1.00  0.00           O  
ATOM   2525  C3'  DA A  80      13.626  -0.756 -14.600  6.00  0.00           C  
ATOM   2526  O3'  DA A  80      13.458  -2.026 -15.230  6.00  0.00           O  
ATOM   2527  C2'  DA A  80      12.754   0.259 -15.340  1.00  0.00           C  
ATOM   2528  C1'  DA A  80      11.381  -0.073 -14.750  7.00  0.00           C  
ATOM   2529  N1   DA A  80       6.301   0.741 -15.060  7.00  0.00           N  
ATOM   2530  C2   DA A  80       7.002  -0.306 -14.670  5.00  0.00           C  
ATOM   2531  N3   DA A  80       8.321  -0.438 -14.610  0.00  0.00           N  
ATOM   2532  C4   DA A  80       8.962   0.706 -15.000  4.00  0.00           C  
ATOM   2533  C5   DA A  80       8.374   1.866 -15.440  4.00  0.00           C  
ATOM   2534  C6   DA A  80       6.958   1.833 -15.450  2.00  0.00           C  
ATOM   2535  N6   DA A  80       6.176   2.827 -15.820  9.00  0.00           N  
ATOM   2536  N7   DA A  80       9.340   2.825 -15.780  1.00  0.00           N  
ATOM   2537  C8   DA A  80      10.463   2.213 -15.520  2.00  0.00           C  
ATOM   2538  N9   DA A  80      10.325   0.925 -15.060  1.00  0.00           N  
ATOM   2539  OP1  DA A  80      15.907   1.976 -11.190  2.00  0.00           O  
ATOM   2540  OP2  DA A  80      15.058   3.828 -12.700  7.00  0.00           O1-
ATOM   2541  H2   DA A  80       6.422  -1.160 -14.350  7.00  0.00           H  
ATOM   2542  H8   DA A  80      11.425   2.679 -15.690  8.00  0.00           H  
ATOM   2543  H1'  DA A  80      11.058  -1.049 -15.110  1.00  0.00           H  
ATOM   2544  H2'  DA A  80      13.058   1.271 -15.060  0.00  0.00           H  
ATOM   2545  H3'  DA A  80      14.673  -0.445 -14.590  1.00  0.00           H  
ATOM   2546  H4'  DA A  80      12.946  -1.684 -12.780  1.00  0.00           H  
ATOM   2547  H5'  DA A  80      13.222   0.291 -11.290  0.00  0.00           H  
ATOM   2548  H61  DA A  80       5.171   2.696 -15.780  0.00  0.00           H  
ATOM   2549  H62  DA A  80       6.597   3.657 -16.200  8.00  0.00           H  
ATOM   2550 H2''  DA A  80      12.785   0.120 -16.420  9.00  0.00           H  
ATOM   2551 H5''  DA A  80      14.733  -0.256 -12.010  9.00  0.00           H  
ATOM   2552  P    DA A  81      14.695  -2.943 -15.720  1.00  0.00           P  
ATOM   2553  C5'  DA A  81      13.285  -5.170 -15.730  1.00  0.00           C  
ATOM   2554  O5'  DA A  81      13.878  -4.107 -16.450  8.00  0.00           O  
ATOM   2555  C4'  DA A  81      11.963  -5.604 -16.370  2.00  0.00           C  
ATOM   2556  O4'  DA A  81      10.922  -4.755 -15.900  3.00  0.00           O  
ATOM   2557  C3'  DA A  81      11.913  -5.601 -17.910  2.00  0.00           C  
ATOM   2558  O3'  DA A  81      12.422  -6.807 -18.490  6.00  0.00           O  
ATOM   2559  C2'  DA A  81      10.394  -5.513 -18.070  0.00  0.00           C  
ATOM   2560  C1'  DA A  81       9.916  -4.660 -16.890  8.00  0.00           C  
ATOM   2561  N1   DA A  81       6.290  -1.368 -18.300  0.00  0.00           N  
ATOM   2562  C2   DA A  81       6.248  -2.626 -17.890  4.00  0.00           C  
ATOM   2563  N3   DA A  81       7.269  -3.408 -17.550  5.00  0.00           N  
ATOM   2564  C4   DA A  81       8.452  -2.733 -17.590  2.00  0.00           C  
ATOM   2565  C5   DA A  81       8.666  -1.437 -17.970  8.00  0.00           C  
ATOM   2566  C6   DA A  81       7.476  -0.755 -18.340  8.00  0.00           C  
ATOM   2567  N6   DA A  81       7.422   0.492 -18.760  9.00  0.00           N  
ATOM   2568  N7   DA A  81      10.038  -1.118 -17.900  6.00  0.00           N  
ATOM   2569  C8   DA A  81      10.583  -2.227 -17.470  9.00  0.00           C  
ATOM   2570  N9   DA A  81       9.686  -3.252 -17.280  9.00  0.00           N  
ATOM   2571  OP1  DA A  81      15.370  -3.552 -14.550  6.00  0.00           O  
ATOM   2572  OP2  DA A  81      15.491  -2.252 -16.760  5.00  0.00           O1-
ATOM   2573  H2   DA A  81       5.267  -3.081 -17.850  4.00  0.00           H  
ATOM   2574  H8   DA A  81      11.645  -2.335 -17.270  4.00  0.00           H  
ATOM   2575  H1'  DA A  81       8.969  -5.047 -16.500  7.00  0.00           H  
ATOM   2576  H2'  DA A  81      10.116  -5.074 -19.030  5.00  0.00           H  
ATOM   2577  H3'  DA A  81      12.397  -4.701 -18.300  1.00  0.00           H  
ATOM   2578  H4'  DA A  81      11.736  -6.613 -16.020  8.00  0.00           H  
ATOM   2579  H5'  DA A  81      13.076  -4.849 -14.710  5.00  0.00           H  
ATOM   2580  H61  DA A  81       6.517   0.942 -18.870  2.00  0.00           H  
ATOM   2581  H62  DA A  81       8.263   1.033 -18.840  4.00  0.00           H  
ATOM   2582 H2''  DA A  81       9.954  -6.504 -17.970  7.00  0.00           H  
ATOM   2583 H5''  DA A  81      13.978  -6.008 -15.690  2.00  0.00           H  
ATOM   2584  P    DC A  82      12.963  -6.892 -20.020  4.00  0.00           P  
ATOM   2585  C5'  DC A  82      10.613  -7.559 -20.930  2.00  0.00           C  
ATOM   2586  O5'  DC A  82      11.673  -6.621 -20.930  5.00  0.00           O  
ATOM   2587  C4'  DC A  82       9.435  -7.203 -21.830  8.00  0.00           C  
ATOM   2588  O4'  DC A  82       8.789  -6.026 -21.380  0.00  0.00           O  
ATOM   2589  C3'  DC A  82       9.778  -7.071 -23.320  3.00  0.00           C  
ATOM   2590  O3'  DC A  82       8.812  -7.898 -24.000  9.00  0.00           O  
ATOM   2591  C2'  DC A  82       9.748  -5.546 -23.460  1.00  0.00           C  
ATOM   2592  C1'  DC A  82       8.735  -5.066 -22.420  4.00  0.00           C  
ATOM   2593  N1   DC A  82       9.017  -3.704 -21.860  4.00  0.00           N  
ATOM   2594  C2   DC A  82       7.998  -2.741 -21.900  1.00  0.00           C  
ATOM   2595  O2   DC A  82       6.846  -3.041 -22.220  6.00  0.00           O  
ATOM   2596  N3   DC A  82       8.266  -1.450 -21.610  1.00  0.00           N  
ATOM   2597  C4   DC A  82       9.464  -1.122 -21.170  5.00  0.00           C  
ATOM   2598  N4   DC A  82       9.683   0.137 -20.930  0.00  0.00           N  
ATOM   2599  C5   DC A  82      10.505  -2.076 -20.990  0.00  0.00           C  
ATOM   2600  C6   DC A  82      10.246  -3.364 -21.330  9.00  0.00           C  
ATOM   2601  OP1  DC A  82      13.340  -8.309 -20.260  8.00  0.00           O  
ATOM   2602  OP2  DC A  82      13.981  -5.861 -20.280  9.00  0.00           O1-
ATOM   2603  H5   DC A  82      11.459  -1.800 -20.570  4.00  0.00           H  
ATOM   2604  H6   DC A  82      11.003  -4.128 -21.190  1.00  0.00           H  
ATOM   2605  H1'  DC A  82       7.737  -5.075 -22.870  7.00  0.00           H  
ATOM   2606  H2'  DC A  82      10.740  -5.154 -23.230  1.00  0.00           H  
ATOM   2607  H3'  DC A  82      10.790  -7.421 -23.530  0.00  0.00           H  
ATOM   2608  H4'  DC A  82       8.715  -8.011 -21.730  7.00  0.00           H  
ATOM   2609  H41  DC A  82       8.933   0.798 -21.140  9.00  0.00           H  
ATOM   2610  H5'  DC A  82      10.232  -7.664 -19.920  1.00  0.00           H  
ATOM   2611  H42  DC A  82      10.472   0.410 -20.370  3.00  0.00           H  
ATOM   2612 H2''  DC A  82       9.477  -5.241 -24.470  3.00  0.00           H  
ATOM   2613 H5''  DC A  82      11.004  -8.521 -21.250  2.00  0.00           H  
ATOM   2614  P    DC A  83       8.590  -7.980 -25.590  1.00  0.00           P  
ATOM   2615  C5'  DC A  83       6.180  -7.060 -25.180  2.00  0.00           C  
ATOM   2616  O5'  DC A  83       7.439  -6.908 -25.830  5.00  0.00           O  
ATOM   2617  C4'  DC A  83       5.114  -6.083 -25.680  5.00  0.00           C  
ATOM   2618  O4'  DC A  83       5.445  -4.795 -25.210  7.00  0.00           O  
ATOM   2619  C3'  DC A  83       4.994  -6.043 -27.210  7.00  0.00           C  
ATOM   2620  O3'  DC A  83       3.617  -5.965 -27.580  1.00  0.00           O  
ATOM   2621  C2'  DC A  83       5.846  -4.817 -27.530  3.00  0.00           C  
ATOM   2622  C1'  DC A  83       5.652  -3.923 -26.300  4.00  0.00           C  
ATOM   2623  N1   DC A  83       6.789  -3.016 -25.950  3.00  0.00           N  
ATOM   2624  C2   DC A  83       6.484  -1.692 -25.620  0.00  0.00           C  
ATOM   2625  O2   DC A  83       5.342  -1.256 -25.740  6.00  0.00           O  
ATOM   2626  N3   DC A  83       7.459  -0.844 -25.220  3.00  0.00           N  
ATOM   2627  C4   DC A  83       8.690  -1.278 -25.110  3.00  0.00           C  
ATOM   2628  N4   DC A  83       9.582  -0.407 -24.750  4.00  0.00           N  
ATOM   2629  C5   DC A  83       9.082  -2.597 -25.480  1.00  0.00           C  
ATOM   2630  C6   DC A  83       8.097  -3.445 -25.890  9.00  0.00           C  
ATOM   2631  OP1  DC A  83       8.022  -9.319 -25.900  2.00  0.00           O  
ATOM   2632  OP2  DC A  83       9.827  -7.586 -26.270  0.00  0.00           O1-
ATOM   2633  H5   DC A  83      10.107  -2.924 -25.430  9.00  0.00           H  
ATOM   2634  H6   DC A  83       8.333  -4.468 -26.150  8.00  0.00           H  
ATOM   2635  H1'  DC A  83       4.738  -3.335 -26.450  0.00  0.00           H  
ATOM   2636  H2'  DC A  83       6.886  -5.117 -27.640  1.00  0.00           H  
ATOM   2637  H3'  DC A  83       5.444  -6.928 -27.660  9.00  0.00           H  
ATOM   2638  H4'  DC A  83       4.149  -6.362 -25.260  3.00  0.00           H  
ATOM   2639  H41  DC A  83       9.251   0.553 -24.610  7.00  0.00           H  
ATOM   2640  H5'  DC A  83       6.307  -6.909 -24.110  7.00  0.00           H  
ATOM   2641  H42  DC A  83      10.524  -0.653 -24.560  2.00  0.00           H  
ATOM   2642 H2''  DC A  83       5.500  -4.338 -28.430  5.00  0.00           H  
ATOM   2643 H5''  DC A  83       5.815  -8.069 -25.350  1.00  0.00           H  
ATOM   2644  P    DC A  84       3.111  -5.906 -29.110  2.00  0.00           P  
ATOM   2645  C5'  DC A  84       2.292  -3.386 -28.740  3.00  0.00           C  
ATOM   2646  O5'  DC A  84       3.136  -4.318 -29.430  1.00  0.00           O  
ATOM   2647  C4'  DC A  84       2.462  -1.912 -29.160  5.00  0.00           C  
ATOM   2648  O4'  DC A  84       3.668  -1.381 -28.630  5.00  0.00           O  
ATOM   2649  C3'  DC A  84       2.498  -1.706 -30.690  7.00  0.00           C  
ATOM   2650  O3'  DC A  84       1.573  -0.724 -31.120  8.00  0.00           O  
ATOM   2651  C2'  DC A  84       3.944  -1.273 -30.910  4.00  0.00           C  
ATOM   2652  C1'  DC A  84       4.255  -0.542 -29.610  3.00  0.00           C  
ATOM   2653  N1   DC A  84       5.710  -0.433 -29.330  0.00  0.00           N  
ATOM   2654  C2   DC A  84       6.307   0.824 -29.250  0.00  0.00           C  
ATOM   2655  O2   DC A  84       5.704   1.835 -29.580  5.00  0.00           O  
ATOM   2656  N3   DC A  84       7.594   0.937 -28.850  3.00  0.00           N  
ATOM   2657  C4   DC A  84       8.272  -0.141 -28.560  7.00  0.00           C  
ATOM   2658  N4   DC A  84       9.468   0.044 -28.090  7.00  0.00           N  
ATOM   2659  C5   DC A  84       7.755  -1.459 -28.710  9.00  0.00           C  
ATOM   2660  C6   DC A  84       6.456  -1.557 -29.090  1.00  0.00           C  
ATOM   2661  OP1  DC A  84       1.718  -6.428 -29.140  2.00  0.00           O  
ATOM   2662  OP2  DC A  84       4.136  -6.601 -29.930  0.00  0.00           O1-
ATOM   2663  H5   DC A  84       8.339  -2.334 -28.490  1.00  0.00           H  
ATOM   2664  H6   DC A  84       5.962  -2.507 -29.190  7.00  0.00           H  
ATOM   2665  H1'  DC A  84       3.778   0.449 -29.620  7.00  0.00           H  
ATOM   2666  H2'  DC A  84       4.562  -2.161 -31.030  9.00  0.00           H  
ATOM   2667  H3'  DC A  84       2.292  -2.643 -31.200  4.00  0.00           H  
ATOM   2668  H4'  DC A  84       1.634  -1.327 -28.760  8.00  0.00           H  
ATOM   2669  H41  DC A  84       9.733   1.020 -27.940  4.00  0.00           H  
ATOM   2670  H5'  DC A  84       2.494  -3.437 -27.670  3.00  0.00           H  
ATOM   2671  H42  DC A  84       9.950  -0.692 -27.630  6.00  0.00           H  
ATOM   2672 H2''  DC A  84       4.048  -0.613 -31.770  3.00  0.00           H  
ATOM   2673 H5''  DC A  84       1.249  -3.660 -28.900  7.00  0.00           H  
ATOM   2674  P    DT A  85       1.359  -0.394 -32.690  6.00  0.00           P  
ATOM   2675  C5'  DT A  85       1.656   2.235 -32.210  1.00  0.00           C  
ATOM   2676  O5'  DT A  85       2.102   1.041 -32.880  9.00  0.00           O  
ATOM   2677  C4'  DT A  85       2.406   3.526 -32.610  3.00  0.00           C  
ATOM   2678  O4'  DT A  85       3.732   3.475 -32.100  9.00  0.00           O  
ATOM   2679  C3'  DT A  85       2.492   3.729 -34.140  1.00  0.00           C  
ATOM   2680  O3'  DT A  85       2.265   5.072 -34.560  8.00  0.00           O  
ATOM   2681  C2'  DT A  85       3.926   3.281 -34.410  4.00  0.00           C  
ATOM   2682  C1'  DT A  85       4.659   3.732 -33.140  8.00  0.00           C  
ATOM   2683  N1   DT A  85       5.914   2.974 -32.850  4.00  0.00           N  
ATOM   2684  C2   DT A  85       7.087   3.692 -32.570  9.00  0.00           C  
ATOM   2685  O2   DT A  85       7.178   4.910 -32.650  1.00  0.00           O  
ATOM   2686  N3   DT A  85       8.205   2.957 -32.240  7.00  0.00           N  
ATOM   2687  C4   DT A  85       8.286   1.584 -32.210  0.00  0.00           C  
ATOM   2688  O4   DT A  85       9.353   1.032 -31.940  0.00  0.00           O  
ATOM   2689  C5   DT A  85       7.047   0.893 -32.570  5.00  0.00           C  
ATOM   2690  C6   DT A  85       5.914   1.593 -32.840  9.00  0.00           C  
ATOM   2691  C7   DT A  85       7.033  -0.625 -32.650  8.00  0.00           C  
ATOM   2692  OP1  DT A  85      -0.087  -0.261 -32.920  3.00  0.00           O  
ATOM   2693  OP2  DT A  85       2.096  -1.429 -33.480  6.00  0.00           O1-
ATOM   2694  H3   DT A  85       9.029   3.490 -31.990  7.00  0.00           H  
ATOM   2695  H6   DT A  85       4.980   1.084 -33.030  2.00  0.00           H  
ATOM   2696  H1'  DT A  85       4.857   4.810 -33.190  4.00  0.00           H  
ATOM   2697  H2'  DT A  85       3.926   2.200 -34.510  9.00  0.00           H  
ATOM   2698  H3'  DT A  85       1.775   3.072 -34.630  4.00  0.00           H  
ATOM   2699  H4'  DT A  85       1.900   4.389 -32.180  2.00  0.00           H  
ATOM   2700  H5'  DT A  85       1.781   2.109 -31.130  5.00  0.00           H  
ATOM   2701  H71  DT A  85       7.247  -1.031 -31.660  2.00  0.00           H  
ATOM   2702  H72  DT A  85       6.070  -0.985 -33.010  8.00  0.00           H  
ATOM   2703  H73  DT A  85       7.821  -0.942 -33.330  3.00  0.00           H  
ATOM   2704 H2''  DT A  85       4.349   3.748 -35.290  6.00  0.00           H  
ATOM   2705 H5''  DT A  85       0.591   2.390 -32.390  6.00  0.00           H  
ATOM   2706  P    DA A  86       2.098   5.464 -36.110  1.00  0.00           P  
ATOM   2707  C5'  DA A  86       4.348   6.909 -36.290  0.00  0.00           C  
ATOM   2708  O5'  DA A  86       3.599   5.739 -36.620  0.00  0.00           O  
ATOM   2709  C4'  DA A  86       5.768   6.837 -36.890  9.00  0.00           C  
ATOM   2710  O4'  DA A  86       6.532   5.890 -36.150  9.00  0.00           O  
ATOM   2711  C3'  DA A  86       5.762   6.382 -38.370  9.00  0.00           C  
ATOM   2712  O3'  DA A  86       6.637   7.100 -39.240  1.00  0.00           O  
ATOM   2713  C2'  DA A  86       6.274   4.952 -38.210  0.00  0.00           C  
ATOM   2714  C1'  DA A  86       7.270   5.105 -37.050  9.00  0.00           C  
ATOM   2715  N1   DA A  86      11.217   2.616 -34.880  8.00  0.00           N  
ATOM   2716  C2   DA A  86      11.037   3.897 -35.190  4.00  0.00           C  
ATOM   2717  N3   DA A  86       9.956   4.442 -35.740  0.00  0.00           N  
ATOM   2718  C4   DA A  86       8.935   3.564 -35.890  3.00  0.00           C  
ATOM   2719  C5   DA A  86       8.956   2.226 -35.590  8.00  0.00           C  
ATOM   2720  C6   DA A  86      10.198   1.788 -35.070  2.00  0.00           C  
ATOM   2721  N6   DA A  86      10.497   0.548 -34.730  4.00  0.00           N  
ATOM   2722  N7   DA A  86       7.732   1.609 -35.920  0.00  0.00           N  
ATOM   2723  C8   DA A  86       7.021   2.625 -36.350  5.00  0.00           C  
ATOM   2724  N9   DA A  86       7.698   3.819 -36.440  1.00  0.00           N  
ATOM   2725  OP1  DA A  86       1.294   6.701 -36.200  9.00  0.00           O  
ATOM   2726  OP2  DA A  86       1.621   4.265 -36.850  7.00  0.00           O1-
ATOM   2727  H2   DA A  86      11.874   4.562 -35.030  1.00  0.00           H  
ATOM   2728  H8   DA A  86       5.988   2.538 -36.660  3.00  0.00           H  
ATOM   2729  H1'  DA A  86       8.151   5.669 -37.390  6.00  0.00           H  
ATOM   2730  H2'  DA A  86       5.442   4.314 -37.910  4.00  0.00           H  
ATOM   2731  H3'  DA A  86       4.743   6.398 -38.770  0.00  0.00           H  
ATOM   2732  H4'  DA A  86       6.246   7.815 -36.820  6.00  0.00           H  
ATOM   2733  H5'  DA A  86       4.430   7.007 -35.210  6.00  0.00           H  
ATOM   2734  H61  DA A  86      11.402   0.439 -34.290  1.00  0.00           H  
ATOM   2735  H62  DA A  86       9.728  -0.057 -34.540  9.00  0.00           H  
ATOM   2736 H2''  DA A  86       6.750   4.587 -39.120  5.00  0.00           H  
ATOM   2737 H5''  DA A  86       3.841   7.792 -36.680  1.00  0.00           H  
ATOM   2738  P    DA A  87       6.238   7.432 -40.780  2.00  0.00           P  
ATOM   2739  C5'  DA A  87       8.078   9.382 -40.780  6.00  0.00           C  
ATOM   2740  O5'  DA A  87       7.552   8.182 -41.350  4.00  0.00           O  
ATOM   2741  C4'  DA A  87       9.625   9.408 -40.770  6.00  0.00           C  
ATOM   2742  O4'  DA A  87      10.072   8.391 -39.880  6.00  0.00           O  
ATOM   2743  C3'  DA A  87      10.312   9.168 -42.130  4.00  0.00           C  
ATOM   2744  O3'  DA A  87      11.516   9.932 -42.250  8.00  0.00           O  
ATOM   2745  C2'  DA A  87      10.540   7.660 -42.060  6.00  0.00           C  
ATOM   2746  C1'  DA A  87      10.861   7.448 -40.580  7.00  0.00           C  
ATOM   2747  N1   DA A  87      12.631   3.403 -37.940  7.00  0.00           N  
ATOM   2748  C2   DA A  87      13.124   4.625 -38.130  1.00  0.00           C  
ATOM   2749  N3   DA A  87      12.588   5.607 -38.850  0.00  0.00           N  
ATOM   2750  C4   DA A  87      11.361   5.287 -39.340  9.00  0.00           C  
ATOM   2751  C5   DA A  87      10.713   4.089 -39.210  0.00  0.00           C  
ATOM   2752  C6   DA A  87      11.436   3.139 -38.450  1.00  0.00           C  
ATOM   2753  N6   DA A  87      11.012   1.918 -38.180  5.00  0.00           N  
ATOM   2754  N7   DA A  87       9.474   4.090 -39.870  8.00  0.00           N  
ATOM   2755  C8   DA A  87       9.408   5.321 -40.320  8.00  0.00           C  
ATOM   2756  N9   DA A  87      10.538   6.079 -40.100  5.00  0.00           N  
ATOM   2757  OP1  DA A  87       5.088   8.363 -40.820  7.00  0.00           O  
ATOM   2758  OP2  DA A  87       6.148   6.158 -41.530  7.00  0.00           O1-
ATOM   2759  H2   DA A  87      14.081   4.837 -37.670  0.00  0.00           H  
ATOM   2760  H8   DA A  87       8.548   5.713 -40.850  8.00  0.00           H  
ATOM   2761  H1'  DA A  87      11.919   7.670 -40.400  0.00  0.00           H  
ATOM   2762  H2'  DA A  87       9.620   7.149 -42.340  7.00  0.00           H  
ATOM   2763  H3'  DA A  87       9.638   9.426 -42.950  6.00  0.00           H  
ATOM   2764  H4'  DA A  87       9.955  10.373 -40.390  7.00  0.00           H  
ATOM   2765  H5'  DA A  87       7.742   9.481 -39.750  9.00  0.00           H  
ATOM   2766  H61  DA A  87      11.575   1.426 -37.490  9.00  0.00           H  
ATOM   2767  H62  DA A  87      10.027   1.771 -38.280  9.00  0.00           H  
ATOM   2768 H2''  DA A  87      11.354   7.338 -42.710  8.00  0.00           H  
ATOM   2769 H5''  DA A  87       7.706  10.242 -41.340  2.00  0.00           H  
ATOM   2770  P    DC A  88      12.517   9.873 -43.520  0.00  0.00           P  
ATOM   2771  C5'  DC A  88      14.578   9.388 -41.920  8.00  0.00           C  
ATOM   2772  O5'  DC A  88      13.730   8.952 -42.990  9.00  0.00           O  
ATOM   2773  C4'  DC A  88      15.789   8.470 -41.650  4.00  0.00           C  
ATOM   2774  O4'  DC A  88      15.304   7.218 -41.180  1.00  0.00           O  
ATOM   2775  C3'  DC A  88      16.685   8.197 -42.880  5.00  0.00           C  
ATOM   2776  O3'  DC A  88      18.068   8.143 -42.520  6.00  0.00           O  
ATOM   2777  C2'  DC A  88      16.145   6.840 -43.310  2.00  0.00           C  
ATOM   2778  C1'  DC A  88      15.865   6.180 -41.960  3.00  0.00           C  
ATOM   2779  N1   DC A  88      14.891   5.051 -42.000  2.00  0.00           N  
ATOM   2780  C2   DC A  88      15.248   3.810 -41.460  3.00  0.00           C  
ATOM   2781  O2   DC A  88      16.400   3.550 -41.140  9.00  0.00           O  
ATOM   2782  N3   DC A  88      14.338   2.805 -41.360  7.00  0.00           N  
ATOM   2783  C4   DC A  88      13.122   3.033 -41.790  9.00  0.00           C  
ATOM   2784  N4   DC A  88      12.278   2.060 -41.590  5.00  0.00           N  
ATOM   2785  C5   DC A  88      12.714   4.225 -42.440  4.00  0.00           C  
ATOM   2786  C6   DC A  88      13.626   5.231 -42.510  5.00  0.00           C  
ATOM   2787  OP1  DC A  88      13.041  11.235 -43.780  6.00  0.00           O  
ATOM   2788  OP2  DC A  88      11.858   9.141 -44.630  3.00  0.00           O1-
ATOM   2789  H5   DC A  88      11.716   4.373 -42.810  9.00  0.00           H  
ATOM   2790  H6   DC A  88      13.369   6.202 -42.920  1.00  0.00           H  
ATOM   2791  H1'  DC A  88      16.815   5.873 -41.500  2.00  0.00           H  
ATOM   2792  H2'  DC A  88      15.234   6.983 -43.890  4.00  0.00           H  
ATOM   2793  H3'  DC A  88      16.528   8.954 -43.650  9.00  0.00           H  
ATOM   2794  H4'  DC A  88      16.406   8.925 -40.880  2.00  0.00           H  
ATOM   2795  H41  DC A  88      12.616   1.289 -41.040  9.00  0.00           H  
ATOM   2796  H5'  DC A  88      13.989   9.449 -41.000  2.00  0.00           H  
ATOM   2797  H42  DC A  88      11.309   2.240 -41.760  4.00  0.00           H  
ATOM   2798 H2''  DC A  88      16.880   6.295 -43.890  8.00  0.00           H  
ATOM   2799 H5''  DC A  88      14.951  10.388 -42.140  8.00  0.00           H  
ATOM   2800  P    DC A  89      19.260   7.959 -43.600  8.00  0.00           P  
ATOM   2801  C5'  DC A  89      20.254   5.925 -42.270  5.00  0.00           C  
ATOM   2802  O5'  DC A  89      19.629   6.403 -43.450  0.00  0.00           O  
ATOM   2803  C4'  DC A  89      20.682   4.454 -42.380  8.00  0.00           C  
ATOM   2804  O4'  DC A  89      19.525   3.620 -42.350  3.00  0.00           O  
ATOM   2805  C3'  DC A  89      21.509   4.114 -43.640  2.00  0.00           C  
ATOM   2806  O3'  DC A  89      22.677   3.366 -43.280  0.00  0.00           O  
ATOM   2807  C2'  DC A  89      20.473   3.343 -44.460  5.00  0.00           C  
ATOM   2808  C1'  DC A  89      19.550   2.697 -43.420  9.00  0.00           C  
ATOM   2809  N1   DC A  89      18.149   2.474 -43.900  6.00  0.00           N  
ATOM   2810  C2   DC A  89      17.563   1.201 -43.830  1.00  0.00           C  
ATOM   2811  O2   DC A  89      18.161   0.223 -43.390  8.00  0.00           O  
ATOM   2812  N3   DC A  89      16.318   0.964 -44.320  2.00  0.00           N  
ATOM   2813  C4   DC A  89      15.652   1.981 -44.820  1.00  0.00           C  
ATOM   2814  N4   DC A  89      14.459   1.723 -45.280  6.00  0.00           N  
ATOM   2815  C5   DC A  89      16.175   3.298 -44.920  5.00  0.00           C  
ATOM   2816  C6   DC A  89      17.424   3.511 -44.430  6.00  0.00           C  
ATOM   2817  OP1  DC A  89      20.449   8.741 -43.180  9.00  0.00           O  
ATOM   2818  OP2  DC A  89      18.713   8.118 -44.960  4.00  0.00           O1-
ATOM   2819  H5   DC A  89      15.616   4.121 -45.330  3.00  0.00           H  
ATOM   2820  H6   DC A  89      17.872   4.501 -44.430  1.00  0.00           H  
ATOM   2821  H1'  DC A  89      19.997   1.765 -43.060  0.00  0.00           H  
ATOM   2822  H2'  DC A  89      19.934   4.058 -45.080  4.00  0.00           H  
ATOM   2823  H3'  DC A  89      21.801   5.028 -44.160  4.00  0.00           H  
ATOM   2824  H4'  DC A  89      21.288   4.229 -41.500  4.00  0.00           H  
ATOM   2825  H41  DC A  89      14.062   0.801 -45.140  4.00  0.00           H  
ATOM   2826  H5'  DC A  89      19.561   6.035 -41.430  7.00  0.00           H  
ATOM   2827  H42  DC A  89      13.890   2.490 -45.570  5.00  0.00           H  
ATOM   2828 H2''  DC A  89      20.937   2.596 -45.100  5.00  0.00           H  
ATOM   2829 H5''  DC A  89      21.136   6.530 -42.050  2.00  0.00           H  
ATOM   2830  P   DC3 A  90      23.706   2.692 -44.340  5.00  0.00           P  
ATOM   2831  C5' DC3 A  90      22.893   0.451 -43.320  8.00  0.00           C  
ATOM   2832  O5' DC3 A  90      23.046   1.238 -44.490  9.00  0.00           O  
ATOM   2833  C4' DC3 A  90      22.151  -0.861 -43.560  6.00  0.00           C  
ATOM   2834  O4' DC3 A  90      20.830  -0.620 -44.030  5.00  0.00           O  
ATOM   2835  C3' DC3 A  90      22.813  -1.779 -44.610  6.00  0.00           C  
ATOM   2836  O3' DC3 A  90      22.856  -3.135 -44.170  2.00  0.00           O  
ATOM   2837  C2' DC3 A  90      21.842  -1.673 -45.780  7.00  0.00           C  
ATOM   2838  C1' DC3 A  90      20.528  -1.585 -45.010  8.00  0.00           C  
ATOM   2839  N1  DC3 A  90      19.382  -1.197 -45.870  1.00  0.00           N  
ATOM   2840  C2  DC3 A  90      18.408  -2.155 -46.180  0.00  0.00           C  
ATOM   2841  O2  DC3 A  90      18.536  -3.342 -45.860  9.00  0.00           O  
ATOM   2842  N3  DC3 A  90      17.310  -1.819 -46.900  1.00  0.00           N  
ATOM   2843  C4  DC3 A  90      17.201  -0.571 -47.320  8.00  0.00           C  
ATOM   2844  N4  DC3 A  90      16.119  -0.271 -47.980  2.00  0.00           N  
ATOM   2845  C5  DC3 A  90      18.208   0.414 -47.130  3.00  0.00           C  
ATOM   2846  C6  DC3 A  90      19.288   0.070 -46.390  3.00  0.00           C  
ATOM   2847  OP1 DC3 A  90      25.016   2.471 -43.680  0.00  0.00           O  
ATOM   2848  OP2 DC3 A  90      23.637   3.356 -45.660  7.00  0.00           O  
ATOM   2849 HO3' DC3 A  90      22.981  -3.683 -44.960  3.00  0.00           H  
ATOM   2850  H5  DC3 A  90      18.119   1.419 -47.520  2.00  0.00           H  
ATOM   2851  H6  DC3 A  90      20.068   0.791 -46.160  6.00  0.00           H  
ATOM   2852  H1' DC3 A  90      20.315  -2.533 -44.510  8.00  0.00           H  
ATOM   2853  H2' DC3 A  90      22.025  -0.751 -46.330  6.00  0.00           H  
ATOM   2854  H3' DC3 A  90      23.803  -1.413 -44.890  7.00  0.00           H  
ATOM   2855  H4' DC3 A  90      22.097  -1.382 -42.610  9.00  0.00           H  
ATOM   2856  H41 DC3 A  90      15.364  -0.949 -47.990  7.00  0.00           H  
ATOM   2857  H5' DC3 A  90      22.337   1.024 -42.580  8.00  0.00           H  
ATOM   2858  H42 DC3 A  90      15.947   0.694 -48.180  3.00  0.00           H  
ATOM   2859 H2'' DC3 A  90      21.869  -2.542 -46.430  0.00  0.00           H  
ATOM   2860 H5'' DC3 A  90      23.881   0.240 -42.910  5.00  0.00           H  
ATOM   2861  Na+ NA+ A  91      13.114 -10.294  -3.290  4.00  0.00           N  
ATOM   2862  Na+ NA+ A  91       9.858 -11.780  -3.310  1.00  0.00           N  
ATOM   2863  Na+ NA+ A  91       8.631 -15.132   0.000  0.00  0.00           N  
ATOM   3171  C   CNT A 208      -8.662  -0.062 -37.240  9.00  0.00           C  
ATOM   3172  C   CNT A 208      -9.224   1.142 -36.760  5.00  0.00           C  
ATOM   3173  C   CNT A 208      -9.270   1.207 -35.340  2.00  0.00           C  
ATOM   3174  C   CNT A 208      -9.796   2.314 -34.660  6.00  0.00           C  
ATOM   3175  C   CNT A 208      -9.866   2.193 -37.510  9.00  0.00           C  
ATOM   3176  C   CNT A 208     -10.660   3.171 -36.820  5.00  0.00           C  
ATOM   3177  C   CNT A 208     -10.648   3.172 -35.380  6.00  0.00           C  
ATOM   3178  C   CNT A 208     -11.749   3.722 -34.660  1.00  0.00           C  
ATOM   3179  C   CNT A 208     -11.726   3.932 -37.360  0.00  0.00           C  
ATOM   3180  C   CNT A 208     -12.989   4.005 -36.750  1.00  0.00           C  
ATOM   3181  C   CNT A 208     -12.972   3.938 -35.340  8.00  0.00           C  
ATOM   3182  C   CNT A 208     -14.176   3.717 -34.630  2.00  0.00           C  
ATOM   3183  C   CNT A 208     -14.272   3.935 -37.330  8.00  0.00           C  
ATOM   3184  C   CNT A 208     -15.341   3.246 -36.730  2.00  0.00           C  
ATOM   3185  C   CNT A 208     -15.294   3.193 -35.310  7.00  0.00           C  
ATOM   3186  C   CNT A 208     -16.152   2.317 -34.620  4.00  0.00           C  
ATOM   3187  C   CNT A 208     -16.347   2.456 -37.310  4.00  0.00           C  
ATOM   3188  C   CNT A 208     -16.825   1.273 -36.720  6.00  0.00           C  
ATOM   3189  C   CNT A 208     -16.753   1.245 -35.310  8.00  0.00           C  
ATOM   3190  C   CNT A 208     -16.921   0.024 -34.620  7.00  0.00           C  
ATOM   3191  C   CNT A 208     -17.176   0.048 -37.310  7.00  0.00           C  
ATOM   3192  C   CNT A 208     -16.838  -1.190 -36.740  2.00  0.00           C  
ATOM   3193  C   CNT A 208     -16.759  -1.187 -35.320  7.00  0.00           C  
ATOM   3194  C   CNT A 208     -16.144  -2.266 -34.660  0.00  0.00           C  
ATOM   3195  C   CNT A 208     -16.349  -2.354 -37.360  1.00  0.00           C  
ATOM   3196  C   CNT A 208     -15.291  -3.104 -36.800  0.00  0.00           C  
ATOM   3197  C   CNT A 208     -15.262  -3.104 -35.380  0.00  0.00           C  
ATOM   3198  C   CNT A 208     -14.189  -3.678 -34.670  9.00  0.00           C  
ATOM   3199  C   CNT A 208     -14.177  -3.689 -37.470  3.00  0.00           C  
ATOM   3200  C   CNT A 208     -12.946  -3.904 -36.790  2.00  0.00           C  
ATOM   3201  C   CNT A 208     -12.981  -3.871 -35.360  1.00  0.00           C  
ATOM   3202  C   CNT A 208     -11.778  -3.701 -34.640  9.00  0.00           C  
ATOM   3203  C   CNT A 208     -11.645  -3.898 -37.330  9.00  0.00           C  
ATOM   3204  C   CNT A 208     -10.568  -3.238 -36.710  7.00  0.00           C  
ATOM   3205  C   CNT A 208     -10.645  -3.187 -35.300  6.00  0.00           C  
ATOM   3206  C   CNT A 208      -9.806  -2.305 -34.600  9.00  0.00           C  
ATOM   3207  C   CNT A 208      -9.534  -2.464 -37.280  1.00  0.00           C  
ATOM   3208  C   CNT A 208      -9.043  -1.291 -36.670  9.00  0.00           C  
ATOM   3209  C   CNT A 208      -9.194  -1.236 -35.270  7.00  0.00           C  
ATOM   3210  C   CNT A 208      -9.087   0.006 -34.620  9.00  0.00           C  
ATOM   3211  C   CNT A 208      -9.100   0.017 -33.210  2.00  0.00           C  
ATOM   3212  C   CNT A 208      -9.268   1.231 -32.530  3.00  0.00           C  
ATOM   3213  C   CNT A 208      -9.273   1.226 -31.120  4.00  0.00           C  
ATOM   3214  C   CNT A 208      -9.821   2.319 -30.420  1.00  0.00           C  
ATOM   3215  C   CNT A 208      -9.803   2.321 -33.240  6.00  0.00           C  
ATOM   3216  C   CNT A 208     -10.666   3.187 -32.540  0.00  0.00           C  
ATOM   3217  C   CNT A 208     -10.678   3.185 -31.130  1.00  0.00           C  
ATOM   3218  C   CNT A 208     -11.770   3.734 -30.420  8.00  0.00           C  
ATOM   3219  C   CNT A 208     -11.758   3.728 -33.250  5.00  0.00           C  
ATOM   3220  C   CNT A 208     -12.965   3.909 -32.540  7.00  0.00           C  
ATOM   3221  C   CNT A 208     -12.976   3.914 -31.130  1.00  0.00           C  
ATOM   3222  C   CNT A 208     -14.182   3.720 -30.420  7.00  0.00           C  
ATOM   3223  C   CNT A 208     -14.174   3.711 -33.230  6.00  0.00           C  
ATOM   3224  C   CNT A 208     -15.262   3.161 -32.520  9.00  0.00           C  
ATOM   3225  C   CNT A 208     -15.270   3.162 -31.120  0.00  0.00           C  
ATOM   3226  C   CNT A 208     -16.137   2.301 -30.410  1.00  0.00           C  
ATOM   3227  C   CNT A 208     -16.138   2.305 -33.210  5.00  0.00           C  
ATOM   3228  C   CNT A 208     -16.696   1.217 -32.520  1.00  0.00           C  
ATOM   3229  C   CNT A 208     -16.696   1.214 -31.110  1.00  0.00           C  
ATOM   3230  C   CNT A 208     -16.887   0.005 -30.420  3.00  0.00           C  
ATOM   3231  C   CNT A 208     -16.898   0.014 -33.220  0.00  0.00           C  
ATOM   3232  C   CNT A 208     -16.698  -1.197 -32.530  8.00  0.00           C  
ATOM   3233  C   CNT A 208     -16.701  -1.201 -31.120  2.00  0.00           C  
ATOM   3234  C   CNT A 208     -16.157  -2.297 -30.430  4.00  0.00           C  
ATOM   3235  C   CNT A 208     -16.148  -2.281 -33.240  4.00  0.00           C  
ATOM   3236  C   CNT A 208     -15.294  -3.158 -32.550  1.00  0.00           C  
ATOM   3237  C   CNT A 208     -15.299  -3.164 -31.130  5.00  0.00           C  
ATOM   3238  C   CNT A 208     -14.216  -3.727 -30.430  1.00  0.00           C  
ATOM   3239  C   CNT A 208     -14.204  -3.705 -33.260  1.00  0.00           C  
ATOM   3240  C   CNT A 208     -13.006  -3.909 -32.540  0.00  0.00           C  
ATOM   3241  C   CNT A 208     -13.007  -3.914 -31.130  5.00  0.00           C  
ATOM   3242  C   CNT A 208     -11.806  -3.714 -30.420  1.00  0.00           C  
ATOM   3243  C   CNT A 208     -11.795  -3.706 -33.230  1.00  0.00           C  
ATOM   3244  C   CNT A 208     -10.721  -3.142 -32.520  9.00  0.00           C  
ATOM   3245  C   CNT A 208     -10.722  -3.143 -31.110  2.00  0.00           C  
ATOM   3246  C   CNT A 208      -9.865  -2.275 -30.410  4.00  0.00           C  
ATOM   3247  C   CNT A 208      -9.849  -2.280 -33.200  3.00  0.00           C  
ATOM   3248  C   CNT A 208      -9.306  -1.184 -32.510  9.00  0.00           C  
ATOM   3249  C   CNT A 208      -9.306  -1.187 -31.100  5.00  0.00           C  
ATOM   3250  C   CNT A 208      -9.100   0.019 -30.410  9.00  0.00           C  
ATOM   3251  C   CNT A 208      -9.101   0.013 -29.000  2.00  0.00           C  
ATOM   3252  C   CNT A 208      -9.284   1.220 -28.300  9.00  0.00           C  
ATOM   3253  C   CNT A 208      -9.287   1.216 -26.890  3.00  0.00           C  
ATOM   3254  C   CNT A 208      -9.839   2.306 -26.190  0.00  0.00           C  
ATOM   3255  C   CNT A 208      -9.829   2.312 -29.010  8.00  0.00           C  
ATOM   3256  C   CNT A 208     -10.693   3.176 -28.300  9.00  0.00           C  
ATOM   3257  C   CNT A 208     -10.698   3.172 -26.890  9.00  0.00           C  
ATOM   3258  C   CNT A 208     -11.787   3.726 -26.190  2.00  0.00           C  
ATOM   3259  C   CNT A 208     -11.779   3.731 -29.010  6.00  0.00           C  
ATOM   3260  C   CNT A 208     -12.987   3.918 -28.310  9.00  0.00           C  
ATOM   3261  C   CNT A 208     -12.993   3.916 -26.890  0.00  0.00           C  
ATOM   3262  C   CNT A 208     -14.199   3.722 -26.190  9.00  0.00           C  
ATOM   3263  C   CNT A 208     -14.191   3.721 -29.010  4.00  0.00           C  
ATOM   3264  C   CNT A 208     -15.280   3.166 -28.300  9.00  0.00           C  
ATOM   3265  C   CNT A 208     -15.286   3.165 -26.890  3.00  0.00           C  
ATOM   3266  C   CNT A 208     -16.149   2.300 -26.190  7.00  0.00           C  
ATOM   3267  C   CNT A 208     -16.143   2.301 -29.000  8.00  0.00           C  
ATOM   3268  C   CNT A 208     -16.697   1.211 -28.300  9.00  0.00           C  
ATOM   3269  C   CNT A 208     -16.702   1.211 -26.890  1.00  0.00           C  
ATOM   3270  C   CNT A 208     -16.893   0.005 -26.190  4.00  0.00           C  
ATOM   3271  C   CNT A 208     -16.888   0.005 -29.010  5.00  0.00           C  
ATOM   3272  C   CNT A 208     -16.702  -1.203 -28.310  6.00  0.00           C  
ATOM   3273  C   CNT A 208     -16.706  -1.202 -26.890  1.00  0.00           C  
ATOM   3274  C   CNT A 208     -16.158  -2.294 -26.190  5.00  0.00           C  
ATOM   3275  C   CNT A 208     -16.158  -2.295 -29.010  2.00  0.00           C  
ATOM   3276  C   CNT A 208     -15.300  -3.165 -28.310  3.00  0.00           C  
ATOM   3277  C   CNT A 208     -15.299  -3.161 -26.900  1.00  0.00           C  
ATOM   3278  C   CNT A 208     -14.212  -3.717 -26.190  8.00  0.00           C  
ATOM   3279  C   CNT A 208     -14.214  -3.723 -29.010  0.00  0.00           C  
ATOM   3280  C   CNT A 208     -13.008  -3.911 -28.310  3.00  0.00           C  
ATOM   3281  C   CNT A 208     -13.005  -3.908 -26.890  9.00  0.00           C  
ATOM   3282  C   CNT A 208     -11.800  -3.712 -26.190  1.00  0.00           C  
ATOM   3283  C   CNT A 208     -11.802  -3.713 -29.010  2.00  0.00           C  
ATOM   3284  C   CNT A 208     -10.718  -3.151 -28.300  1.00  0.00           C  
ATOM   3285  C   CNT A 208     -10.714  -3.152 -26.890  2.00  0.00           C  
ATOM   3286  C   CNT A 208      -9.852  -2.286 -26.190  4.00  0.00           C  
ATOM   3287  C   CNT A 208      -9.858  -2.280 -29.000  0.00  0.00           C  
ATOM   3288  C   CNT A 208      -9.300  -1.194 -28.300  1.00  0.00           C  
ATOM   3289  C   CNT A 208      -9.297  -1.197 -26.890  4.00  0.00           C  
ATOM   3290  C   CNT A 208      -9.102   0.009 -26.180  4.00  0.00           C  
ATOM   3291  C   CNT A 208      -9.102   0.008 -24.770  0.00  0.00           C  
ATOM   3292  C   CNT A 208      -9.290   1.214 -24.070  3.00  0.00           C  
ATOM   3293  C   CNT A 208      -9.290   1.214 -22.650  2.00  0.00           C  
ATOM   3294  C   CNT A 208      -9.842   2.303 -21.950  9.00  0.00           C  
ATOM   3295  C   CNT A 208      -9.840   2.304 -24.770  9.00  0.00           C  
ATOM   3296  C   CNT A 208     -10.703   3.169 -24.070  3.00  0.00           C  
ATOM   3297  C   CNT A 208     -10.704   3.168 -22.650  4.00  0.00           C  
ATOM   3298  C   CNT A 208     -11.792   3.722 -21.950  5.00  0.00           C  
ATOM   3299  C   CNT A 208     -11.790   3.724 -24.770  7.00  0.00           C  
ATOM   3300  C   CNT A 208     -12.997   3.913 -24.070  4.00  0.00           C  
ATOM   3301  C   CNT A 208     -12.998   3.913 -22.660  9.00  0.00           C  
ATOM   3302  C   CNT A 208     -14.204   3.720 -21.950  5.00  0.00           C  
ATOM   3303  C   CNT A 208     -14.202   3.720 -24.770  9.00  0.00           C  
ATOM   3304  C   CNT A 208     -15.290   3.164 -24.070  4.00  0.00           C  
ATOM   3305  C   CNT A 208     -15.291   3.164 -22.660  7.00  0.00           C  
ATOM   3306  C   CNT A 208     -16.154   2.300 -21.950  3.00  0.00           C  
ATOM   3307  C   CNT A 208     -16.152   2.300 -24.780  3.00  0.00           C  
ATOM   3308  C   CNT A 208     -16.706   1.211 -24.070  3.00  0.00           C  
ATOM   3309  C   CNT A 208     -16.705   1.211 -22.660  5.00  0.00           C  
ATOM   3310  C   CNT A 208     -16.894   0.005 -21.950  3.00  0.00           C  
ATOM   3311  C   CNT A 208     -16.896   0.005 -24.780  7.00  0.00           C  
ATOM   3312  C   CNT A 208     -16.707  -1.202 -24.070  9.00  0.00           C  
ATOM   3313  C   CNT A 208     -16.704  -1.201 -22.660  2.00  0.00           C  
ATOM   3314  C   CNT A 208     -16.156  -2.291 -21.950  0.00  0.00           C  
ATOM   3315  C   CNT A 208     -16.158  -2.292 -24.780  5.00  0.00           C  
ATOM   3316  C   CNT A 208     -15.297  -3.158 -24.070  8.00  0.00           C  
ATOM   3317  C   CNT A 208     -15.297  -3.158 -22.660  4.00  0.00           C  
ATOM   3318  C   CNT A 208     -14.210  -3.715 -21.950  6.00  0.00           C  
ATOM   3319  C   CNT A 208     -14.210  -3.715 -24.780  5.00  0.00           C  
ATOM   3320  C   CNT A 208     -13.004  -3.906 -24.070  3.00  0.00           C  
ATOM   3321  C   CNT A 208     -13.003  -3.905 -22.660  6.00  0.00           C  
ATOM   3322  C   CNT A 208     -11.798  -3.711 -21.950  7.00  0.00           C  
ATOM   3323  C   CNT A 208     -11.798  -3.712 -24.770  1.00  0.00           C  
ATOM   3324  C   CNT A 208     -10.712  -3.153 -24.070  1.00  0.00           C  
ATOM   3325  C   CNT A 208     -10.712  -3.153 -22.660  6.00  0.00           C  
ATOM   3326  C   CNT A 208      -9.852  -2.286 -21.950  6.00  0.00           C  
ATOM   3327  C   CNT A 208      -9.851  -2.287 -24.770  5.00  0.00           C  
ATOM   3328  C   CNT A 208      -9.296  -1.199 -24.070  5.00  0.00           C  
ATOM   3329  C   CNT A 208      -9.297  -1.198 -22.650  1.00  0.00           C  
ATOM   3330  C   CNT A 208      -9.102   0.007 -21.950  6.00  0.00           C  
ATOM   3331  C   CNT A 208      -9.102   0.008 -20.530  8.00  0.00           C  
ATOM   3332  C   CNT A 208      -9.290   1.214 -19.830  2.00  0.00           C  
ATOM   3333  C   CNT A 208      -9.290   1.214 -18.410  8.00  0.00           C  
ATOM   3334  C   CNT A 208      -9.844   2.302 -17.700  5.00  0.00           C  
ATOM   3335  C   CNT A 208      -9.843   2.303 -20.530  1.00  0.00           C  
ATOM   3336  C   CNT A 208     -10.707   3.166 -19.830  0.00  0.00           C  
ATOM   3337  C   CNT A 208     -10.706   3.166 -18.410  1.00  0.00           C  
ATOM   3338  C   CNT A 208     -11.794   3.721 -17.700  0.00  0.00           C  
ATOM   3339  C   CNT A 208     -11.793   3.722 -20.530  5.00  0.00           C  
ATOM   3340  C   CNT A 208     -13.000   3.912 -19.830  9.00  0.00           C  
ATOM   3341  C   CNT A 208     -13.000   3.911 -18.410  5.00  0.00           C  
ATOM   3342  C   CNT A 208     -14.206   3.719 -17.700  4.00  0.00           C  
ATOM   3343  C   CNT A 208     -14.205   3.720 -20.530  2.00  0.00           C  
ATOM   3344  C   CNT A 208     -15.293   3.164 -19.830  1.00  0.00           C  
ATOM   3345  C   CNT A 208     -15.293   3.164 -18.410  5.00  0.00           C  
ATOM   3346  C   CNT A 208     -16.157   2.300 -17.710  8.00  0.00           C  
ATOM   3347  C   CNT A 208     -16.156   2.300 -20.540  3.00  0.00           C  
ATOM   3348  C   CNT A 208     -16.708   1.211 -19.830  1.00  0.00           C  
ATOM   3349  C   CNT A 208     -16.710   1.212 -18.410  6.00  0.00           C  
ATOM   3350  C   CNT A 208     -16.898   0.005 -17.710  2.00  0.00           C  
ATOM   3351  C   CNT A 208     -16.896   0.005 -20.540  5.00  0.00           C  
ATOM   3352  C   CNT A 208     -16.705  -1.200 -19.830  6.00  0.00           C  
ATOM   3353  C   CNT A 208     -16.707  -1.200 -18.410  2.00  0.00           C  
ATOM   3354  C   CNT A 208     -16.156  -2.290 -17.710  2.00  0.00           C  
ATOM   3355  C   CNT A 208     -16.156  -2.290 -20.540  7.00  0.00           C  
ATOM   3356  C   CNT A 208     -15.296  -3.157 -19.830  7.00  0.00           C  
ATOM   3357  C   CNT A 208     -15.296  -3.156 -18.410  5.00  0.00           C  
ATOM   3358  C   CNT A 208     -14.209  -3.713 -17.710  6.00  0.00           C  
ATOM   3359  C   CNT A 208     -14.210  -3.714 -20.530  6.00  0.00           C  
ATOM   3360  C   CNT A 208     -13.004  -3.905 -19.830  1.00  0.00           C  
ATOM   3361  C   CNT A 208     -13.003  -3.905 -18.410  7.00  0.00           C  
ATOM   3362  C   CNT A 208     -11.797  -3.710 -17.710  7.00  0.00           C  
ATOM   3363  C   CNT A 208     -11.798  -3.711 -20.530  6.00  0.00           C  
ATOM   3364  C   CNT A 208     -10.714  -3.150 -19.830  5.00  0.00           C  
ATOM   3365  C   CNT A 208     -10.713  -3.150 -18.410  2.00  0.00           C  
ATOM   3366  C   CNT A 208      -9.851  -2.286 -17.700  0.00  0.00           C  
ATOM   3367  C   CNT A 208      -9.854  -2.284 -20.530  2.00  0.00           C  
ATOM   3368  C   CNT A 208      -9.297  -1.198 -19.830  2.00  0.00           C  
ATOM   3369  C   CNT A 208      -9.296  -1.198 -18.410  4.00  0.00           C  
ATOM   3370  C   CNT A 208      -9.102   0.007 -17.700  2.00  0.00           C  
ATOM   3371  C   CNT A 208      -9.101   0.006 -16.290  4.00  0.00           C  
ATOM   3372  C   CNT A 208      -9.291   1.212 -15.580  0.00  0.00           C  
ATOM   3373  C   CNT A 208      -9.290   1.212 -14.160  3.00  0.00           C  
ATOM   3374  C   CNT A 208      -9.845   2.300 -13.460  2.00  0.00           C  
ATOM   3375  C   CNT A 208      -9.845   2.300 -16.290  0.00  0.00           C  
ATOM   3376  C   CNT A 208     -10.708   3.164 -15.580  2.00  0.00           C  
ATOM   3377  C   CNT A 208     -10.707   3.164 -14.160  9.00  0.00           C  
ATOM   3378  C   CNT A 208     -11.794   3.720 -13.460  2.00  0.00           C  
ATOM   3379  C   CNT A 208     -11.794   3.720 -16.290  5.00  0.00           C  
ATOM   3380  C   CNT A 208     -13.000   3.911 -15.580  9.00  0.00           C  
ATOM   3381  C   CNT A 208     -13.000   3.910 -14.160  4.00  0.00           C  
ATOM   3382  C   CNT A 208     -14.206   3.718 -13.460  6.00  0.00           C  
ATOM   3383  C   CNT A 208     -14.206   3.719 -16.290  4.00  0.00           C  
ATOM   3384  C   CNT A 208     -15.294   3.164 -15.580  7.00  0.00           C  
ATOM   3385  C   CNT A 208     -15.294   3.164 -14.160  2.00  0.00           C  
ATOM   3386  C   CNT A 208     -16.157   2.301 -13.460  2.00  0.00           C  
ATOM   3387  C   CNT A 208     -16.157   2.301 -16.290  4.00  0.00           C  
ATOM   3388  C   CNT A 208     -16.709   1.212 -15.580  4.00  0.00           C  
ATOM   3389  C   CNT A 208     -16.709   1.212 -14.160  4.00  0.00           C  
ATOM   3390  C   CNT A 208     -16.897   0.006 -13.460  4.00  0.00           C  
ATOM   3391  C   CNT A 208     -16.896   0.006 -16.290  6.00  0.00           C  
ATOM   3392  C   CNT A 208     -16.705  -1.199 -15.580  2.00  0.00           C  
ATOM   3393  C   CNT A 208     -16.706  -1.200 -14.170  8.00  0.00           C  
ATOM   3394  C   CNT A 208     -16.156  -2.289 -13.460  5.00  0.00           C  
ATOM   3395  C   CNT A 208     -16.156  -2.289 -16.290  1.00  0.00           C  
ATOM   3396  C   CNT A 208     -15.295  -3.155 -15.580  1.00  0.00           C  
ATOM   3397  C   CNT A 208     -15.295  -3.155 -14.160  0.00  0.00           C  
ATOM   3398  C   CNT A 208     -14.208  -3.711 -13.460  5.00  0.00           C  
ATOM   3399  C   CNT A 208     -14.208  -3.712 -16.290  7.00  0.00           C  
ATOM   3400  C   CNT A 208     -13.002  -3.903 -15.580  8.00  0.00           C  
ATOM   3401  C   CNT A 208     -13.002  -3.902 -14.160  9.00  0.00           C  
ATOM   3402  C   CNT A 208     -11.796  -3.709 -13.460  9.00  0.00           C  
ATOM   3403  C   CNT A 208     -11.797  -3.710 -16.290  0.00  0.00           C  
ATOM   3404  C   CNT A 208     -10.710  -3.152 -15.580  4.00  0.00           C  
ATOM   3405  C   CNT A 208     -10.710  -3.152 -14.160  9.00  0.00           C  
ATOM   3406  C   CNT A 208      -9.848  -2.287 -13.460  9.00  0.00           C  
ATOM   3407  C   CNT A 208      -9.849  -2.287 -16.290  3.00  0.00           C  
ATOM   3408  C   CNT A 208      -9.294  -1.199 -15.580  1.00  0.00           C  
ATOM   3409  C   CNT A 208      -9.294  -1.199 -14.160  1.00  0.00           C  
ATOM   3410  C   CNT A 208      -9.100   0.006 -13.460  0.00  0.00           C  
ATOM   3411  C   CNT A 208      -9.100   0.006 -12.040  3.00  0.00           C  
ATOM   3412  C   CNT A 208      -9.289   1.213 -11.330  8.00  0.00           C  
ATOM   3413  C   CNT A 208      -9.289   1.213  -9.910  1.00  0.00           C  
ATOM   3414  C   CNT A 208      -9.844   2.300  -9.210  2.00  0.00           C  
ATOM   3415  C   CNT A 208      -9.844   2.300 -12.040  0.00  0.00           C  
ATOM   3416  C   CNT A 208     -10.706   3.164 -11.330  9.00  0.00           C  
ATOM   3417  C   CNT A 208     -10.707   3.163  -9.910  0.00  0.00           C  
ATOM   3418  C   CNT A 208     -11.794   3.719  -9.210  7.00  0.00           C  
ATOM   3419  C   CNT A 208     -11.794   3.719 -12.040  1.00  0.00           C  
ATOM   3420  C   CNT A 208     -13.000   3.910 -11.330  3.00  0.00           C  
ATOM   3421  C   CNT A 208     -13.000   3.910  -9.910  4.00  0.00           C  
ATOM   3422  C   CNT A 208     -14.205   3.718  -9.210  3.00  0.00           C  
ATOM   3423  C   CNT A 208     -14.206   3.718 -12.040  1.00  0.00           C  
ATOM   3424  C   CNT A 208     -15.293   3.164 -11.330  4.00  0.00           C  
ATOM   3425  C   CNT A 208     -15.293   3.164  -9.910  5.00  0.00           C  
ATOM   3426  C   CNT A 208     -16.156   2.301  -9.210  2.00  0.00           C  
ATOM   3427  C   CNT A 208     -16.157   2.300 -12.040  2.00  0.00           C  
ATOM   3428  C   CNT A 208     -16.710   1.212 -11.330  8.00  0.00           C  
ATOM   3429  C   CNT A 208     -16.709   1.212  -9.910  6.00  0.00           C  
ATOM   3430  C   CNT A 208     -16.896   0.006  -9.210  3.00  0.00           C  
ATOM   3431  C   CNT A 208     -16.898   0.006 -12.040  5.00  0.00           C  
ATOM   3432  C   CNT A 208     -16.707  -1.200 -11.330  4.00  0.00           C  
ATOM   3433  C   CNT A 208     -16.704  -1.199  -9.910  4.00  0.00           C  
ATOM   3434  C   CNT A 208     -16.154  -2.289  -9.210  3.00  0.00           C  
ATOM   3435  C   CNT A 208     -16.156  -2.289 -12.040  8.00  0.00           C  
ATOM   3436  C   CNT A 208     -15.294  -3.154 -11.330  1.00  0.00           C  
ATOM   3437  C   CNT A 208     -15.294  -3.155  -9.910  2.00  0.00           C  
ATOM   3438  C   CNT A 208     -14.207  -3.711  -9.210  8.00  0.00           C  
ATOM   3439  C   CNT A 208     -14.207  -3.711 -12.040  9.00  0.00           C  
ATOM   3440  C   CNT A 208     -13.001  -3.902 -11.330  9.00  0.00           C  
ATOM   3441  C   CNT A 208     -13.001  -3.902  -9.910  4.00  0.00           C  
ATOM   3442  C   CNT A 208     -11.795  -3.709  -9.210  4.00  0.00           C  
ATOM   3443  C   CNT A 208     -11.795  -3.709 -12.040  8.00  0.00           C  
ATOM   3444  C   CNT A 208     -10.709  -3.152 -11.330  0.00  0.00           C  
ATOM   3445  C   CNT A 208     -10.709  -3.151  -9.910  0.00  0.00           C  
ATOM   3446  C   CNT A 208      -9.847  -2.286  -9.210  4.00  0.00           C  
ATOM   3447  C   CNT A 208      -9.848  -2.287 -12.040  4.00  0.00           C  
ATOM   3448  C   CNT A 208      -9.293  -1.199 -11.330  2.00  0.00           C  
ATOM   3449  C   CNT A 208      -9.292  -1.199  -9.910  4.00  0.00           C  
ATOM   3450  C   CNT A 208      -9.099   0.007  -9.210  1.00  0.00           C  
ATOM   3451  C   CNT A 208      -9.099   0.007  -7.790  2.00  0.00           C  
ATOM   3452  C   CNT A 208      -9.288   1.213  -7.080  2.00  0.00           C  
ATOM   3453  C   CNT A 208      -9.288   1.213  -5.660  7.00  0.00           C  
ATOM   3454  C   CNT A 208      -9.843   2.301  -4.950  2.00  0.00           C  
ATOM   3455  C   CNT A 208      -9.843   2.300  -7.790  1.00  0.00           C  
ATOM   3456  C   CNT A 208     -10.707   3.164  -7.080  5.00  0.00           C  
ATOM   3457  C   CNT A 208     -10.706   3.164  -5.660  1.00  0.00           C  
ATOM   3458  C   CNT A 208     -11.793   3.719  -4.950  0.00  0.00           C  
ATOM   3459  C   CNT A 208     -11.794   3.719  -7.790  5.00  0.00           C  
ATOM   3460  C   CNT A 208     -13.000   3.909  -7.080  2.00  0.00           C  
ATOM   3461  C   CNT A 208     -12.999   3.909  -5.660  4.00  0.00           C  
ATOM   3462  C   CNT A 208     -14.205   3.718  -4.950  5.00  0.00           C  
ATOM   3463  C   CNT A 208     -14.205   3.718  -7.790  6.00  0.00           C  
ATOM   3464  C   CNT A 208     -15.293   3.164  -7.080  7.00  0.00           C  
ATOM   3465  C   CNT A 208     -15.293   3.163  -5.660  2.00  0.00           C  
ATOM   3466  C   CNT A 208     -16.157   2.300  -4.950  3.00  0.00           C  
ATOM   3467  C   CNT A 208     -16.156   2.301  -7.790  4.00  0.00           C  
ATOM   3468  C   CNT A 208     -16.709   1.212  -7.080  7.00  0.00           C  
ATOM   3469  C   CNT A 208     -16.710   1.212  -5.660  9.00  0.00           C  
ATOM   3470  C   CNT A 208     -16.898   0.006  -4.950  6.00  0.00           C  
ATOM   3471  C   CNT A 208     -16.896   0.006  -7.790  5.00  0.00           C  
ATOM   3472  C   CNT A 208     -16.704  -1.199  -7.080  7.00  0.00           C  
ATOM   3473  C   CNT A 208     -16.706  -1.200  -5.660  5.00  0.00           C  
ATOM   3474  C   CNT A 208     -16.155  -2.289  -4.950  1.00  0.00           C  
ATOM   3475  C   CNT A 208     -16.154  -2.289  -7.790  6.00  0.00           C  
ATOM   3476  C   CNT A 208     -15.294  -3.155  -7.080  0.00  0.00           C  
ATOM   3477  C   CNT A 208     -15.294  -3.154  -5.660  8.00  0.00           C  
ATOM   3478  C   CNT A 208     -14.207  -3.710  -4.950  4.00  0.00           C  
ATOM   3479  C   CNT A 208     -14.207  -3.711  -7.790  9.00  0.00           C  
ATOM   3480  C   CNT A 208     -13.001  -3.902  -7.080  5.00  0.00           C  
ATOM   3481  C   CNT A 208     -13.001  -3.902  -5.660  1.00  0.00           C  
ATOM   3482  C   CNT A 208     -11.795  -3.708  -4.950  3.00  0.00           C  
ATOM   3483  C   CNT A 208     -11.795  -3.709  -7.790  3.00  0.00           C  
ATOM   3484  C   CNT A 208     -10.709  -3.151  -7.080  5.00  0.00           C  
ATOM   3485  C   CNT A 208     -10.709  -3.151  -5.660  3.00  0.00           C  
ATOM   3486  C   CNT A 208      -9.847  -2.286  -4.950  5.00  0.00           C  
ATOM   3487  C   CNT A 208      -9.847  -2.286  -7.790  4.00  0.00           C  
ATOM   3488  C   CNT A 208      -9.292  -1.199  -7.080  5.00  0.00           C  
ATOM   3489  C   CNT A 208      -9.292  -1.199  -5.660  6.00  0.00           C  
ATOM   3490  C   CNT A 208      -9.099   0.007  -4.950  5.00  0.00           C  
ATOM   3491  C   CNT A 208      -9.099   0.007  -3.540  6.00  0.00           C  
ATOM   3492  C   CNT A 208      -9.289   1.213  -2.830  1.00  0.00           C  
ATOM   3493  C   CNT A 208      -9.289   1.213  -1.410  8.00  0.00           C  
ATOM   3494  C   CNT A 208      -9.843   2.301  -0.700  1.00  0.00           C  
ATOM   3495  C   CNT A 208      -9.844   2.300  -3.540  5.00  0.00           C  
ATOM   3496  C   CNT A 208     -10.706   3.164  -2.830  6.00  0.00           C  
ATOM   3497  C   CNT A 208     -10.706   3.164  -1.410  4.00  0.00           C  
ATOM   3498  C   CNT A 208     -11.793   3.719  -0.700  8.00  0.00           C  
ATOM   3499  C   CNT A 208     -11.793   3.719  -3.540  3.00  0.00           C  
ATOM   3500  C   CNT A 208     -12.999   3.910  -2.830  2.00  0.00           C  
ATOM   3501  C   CNT A 208     -12.999   3.910  -1.410  0.00  0.00           C  
ATOM   3502  C   CNT A 208     -14.205   3.718  -0.700  4.00  0.00           C  
ATOM   3503  C   CNT A 208     -14.205   3.718  -3.540  3.00  0.00           C  
ATOM   3504  C   CNT A 208     -15.293   3.164  -2.830  0.00  0.00           C  
ATOM   3505  C   CNT A 208     -15.293   3.164  -1.410  5.00  0.00           C  
ATOM   3506  C   CNT A 208     -16.156   2.301  -0.700  0.00  0.00           C  
ATOM   3507  C   CNT A 208     -16.156   2.301  -3.540  3.00  0.00           C  
ATOM   3508  C   CNT A 208     -16.708   1.212  -2.830  1.00  0.00           C  
ATOM   3509  C   CNT A 208     -16.708   1.212  -1.410  2.00  0.00           C  
ATOM   3510  C   CNT A 208     -16.896   0.006  -0.700  3.00  0.00           C  
ATOM   3511  C   CNT A 208     -16.896   0.006  -3.540  7.00  0.00           C  
ATOM   3512  C   CNT A 208     -16.705  -1.199  -2.830  5.00  0.00           C  
ATOM   3513  C   CNT A 208     -16.705  -1.199  -1.410  5.00  0.00           C  
ATOM   3514  C   CNT A 208     -16.155  -2.289  -0.700  6.00  0.00           C  
ATOM   3515  C   CNT A 208     -16.155  -2.289  -3.540  1.00  0.00           C  
ATOM   3516  C   CNT A 208     -15.294  -3.154  -2.830  0.00  0.00           C  
ATOM   3517  C   CNT A 208     -15.294  -3.154  -1.410  4.00  0.00           C  
ATOM   3518  C   CNT A 208     -14.207  -3.710  -0.700  2.00  0.00           C  
ATOM   3519  C   CNT A 208     -14.207  -3.710  -3.540  5.00  0.00           C  
ATOM   3520  C   CNT A 208     -13.001  -3.901  -2.830  0.00  0.00           C  
ATOM   3521  C   CNT A 208     -13.001  -3.901  -1.410  4.00  0.00           C  
ATOM   3522  C   CNT A 208     -11.795  -3.708  -0.700  6.00  0.00           C  
ATOM   3523  C   CNT A 208     -11.795  -3.708  -3.540  4.00  0.00           C  
ATOM   3524  C   CNT A 208     -10.709  -3.151  -2.830  1.00  0.00           C  
ATOM   3525  C   CNT A 208     -10.709  -3.151  -1.410  7.00  0.00           C  
ATOM   3526  C   CNT A 208      -9.847  -2.286  -0.700  0.00  0.00           C  
ATOM   3527  C   CNT A 208      -9.847  -2.286  -3.540  5.00  0.00           C  
ATOM   3528  C   CNT A 208      -9.292  -1.199  -2.830  7.00  0.00           C  
ATOM   3529  C   CNT A 208      -9.292  -1.199  -1.410  3.00  0.00           C  
ATOM   3530  C   CNT A 208      -9.099   0.007  -0.700  0.00  0.00           C  
ATOM   3531  C   CNT A 208      -9.099   0.007   0.710  3.00  0.00           C  
ATOM   3532  C   CNT A 208      -9.289   1.213   1.420  7.00  0.00           C  
ATOM   3533  C   CNT A 208      -9.289   1.213   2.840  8.00  0.00           C  
ATOM   3534  C   CNT A 208      -9.843   2.301   3.540  5.00  0.00           C  
ATOM   3535  C   CNT A 208      -9.843   2.301   0.710  9.00  0.00           C  
ATOM   3536  C   CNT A 208     -10.705   3.165   1.420  0.00  0.00           C  
ATOM   3537  C   CNT A 208     -10.706   3.164   2.840  7.00  0.00           C  
ATOM   3538  C   CNT A 208     -11.793   3.719   3.540  1.00  0.00           C  
ATOM   3539  C   CNT A 208     -11.793   3.719   0.710  5.00  0.00           C  
ATOM   3540  C   CNT A 208     -12.999   3.910   1.420  1.00  0.00           C  
ATOM   3541  C   CNT A 208     -12.999   3.910   2.840  3.00  0.00           C  
ATOM   3542  C   CNT A 208     -14.205   3.718   3.540  3.00  0.00           C  
ATOM   3543  C   CNT A 208     -14.205   3.718   0.710  6.00  0.00           C  
ATOM   3544  C   CNT A 208     -15.293   3.163   1.420  2.00  0.00           C  
ATOM   3545  C   CNT A 208     -15.293   3.164   2.840  2.00  0.00           C  
ATOM   3546  C   CNT A 208     -16.156   2.301   3.540  9.00  0.00           C  
ATOM   3547  C   CNT A 208     -16.156   2.300   0.710  2.00  0.00           C  
ATOM   3548  C   CNT A 208     -16.710   1.212   1.420  4.00  0.00           C  
ATOM   3549  C   CNT A 208     -16.708   1.212   2.840  8.00  0.00           C  
ATOM   3550  C   CNT A 208     -16.896   0.006   3.540  4.00  0.00           C  
ATOM   3551  C   CNT A 208     -16.898   0.006   0.710  1.00  0.00           C  
ATOM   3552  C   CNT A 208     -16.706  -1.200   1.420  2.00  0.00           C  
ATOM   3553  C   CNT A 208     -16.704  -1.199   2.840  1.00  0.00           C  
ATOM   3554  C   CNT A 208     -16.154  -2.289   3.540  7.00  0.00           C  
ATOM   3555  C   CNT A 208     -16.155  -2.289   0.710  4.00  0.00           C  
ATOM   3556  C   CNT A 208     -15.294  -3.154   1.420  6.00  0.00           C  
ATOM   3557  C   CNT A 208     -15.293  -3.155   2.840  3.00  0.00           C  
ATOM   3558  C   CNT A 208     -14.207  -3.711   3.540  2.00  0.00           C  
ATOM   3559  C   CNT A 208     -14.207  -3.710   0.710  1.00  0.00           C  
ATOM   3560  C   CNT A 208     -13.001  -3.902   1.420  9.00  0.00           C  
ATOM   3561  C   CNT A 208     -13.000  -3.902   2.840  1.00  0.00           C  
ATOM   3562  C   CNT A 208     -11.795  -3.708   3.540  8.00  0.00           C  
ATOM   3563  C   CNT A 208     -11.795  -3.708   0.710  0.00  0.00           C  
ATOM   3564  C   CNT A 208     -10.709  -3.151   1.420  9.00  0.00           C  
ATOM   3565  C   CNT A 208     -10.709  -3.151   2.840  6.00  0.00           C  
ATOM   3566  C   CNT A 208      -9.847  -2.286   3.540  5.00  0.00           C  
ATOM   3567  C   CNT A 208      -9.847  -2.286   0.710  5.00  0.00           C  
ATOM   3568  C   CNT A 208      -9.292  -1.199   1.420  6.00  0.00           C  
ATOM   3569  C   CNT A 208      -9.292  -1.199   2.840  8.00  0.00           C  
ATOM   3570  C   CNT A 208      -9.099   0.007   3.540  0.00  0.00           C  
ATOM   3571  C   CNT A 208      -9.099   0.007   4.960  6.00  0.00           C  
ATOM   3572  C   CNT A 208      -9.288   1.213   5.670  3.00  0.00           C  
ATOM   3573  C   CNT A 208      -9.288   1.213   7.090  8.00  0.00           C  
ATOM   3574  C   CNT A 208      -9.842   2.301   7.800  8.00  0.00           C  
ATOM   3575  C   CNT A 208      -9.843   2.301   4.960  0.00  0.00           C  
ATOM   3576  C   CNT A 208     -10.706   3.164   5.670  9.00  0.00           C  
ATOM   3577  C   CNT A 208     -10.705   3.165   7.090  2.00  0.00           C  
ATOM   3578  C   CNT A 208     -11.793   3.719   7.800  9.00  0.00           C  
ATOM   3579  C   CNT A 208     -11.793   3.719   4.960  1.00  0.00           C  
ATOM   3580  C   CNT A 208     -12.999   3.910   5.670  3.00  0.00           C  
ATOM   3581  C   CNT A 208     -12.999   3.909   7.090  7.00  0.00           C  
ATOM   3582  C   CNT A 208     -14.205   3.718   7.800  6.00  0.00           C  
ATOM   3583  C   CNT A 208     -14.205   3.718   4.960  2.00  0.00           C  
ATOM   3584  C   CNT A 208     -15.293   3.164   5.670  4.00  0.00           C  
ATOM   3585  C   CNT A 208     -15.293   3.163   7.090  9.00  0.00           C  
ATOM   3586  C   CNT A 208     -16.156   2.300   7.800  6.00  0.00           C  
ATOM   3587  C   CNT A 208     -16.156   2.301   4.960  4.00  0.00           C  
ATOM   3588  C   CNT A 208     -16.708   1.212   5.670  6.00  0.00           C  
ATOM   3589  C   CNT A 208     -16.709   1.212   7.090  0.00  0.00           C  
ATOM   3590  C   CNT A 208     -16.898   0.006   7.800  0.00  0.00           C  
ATOM   3591  C   CNT A 208     -16.896   0.006   4.960  5.00  0.00           C  
ATOM   3592  C   CNT A 208     -16.703  -1.199   5.670  7.00  0.00           C  
ATOM   3593  C   CNT A 208     -16.706  -1.200   7.090  2.00  0.00           C  
ATOM   3594  C   CNT A 208     -16.155  -2.289   7.800  0.00  0.00           C  
ATOM   3595  C   CNT A 208     -16.154  -2.289   4.960  3.00  0.00           C  
ATOM   3596  C   CNT A 208     -15.293  -3.155   5.670  2.00  0.00           C  
ATOM   3597  C   CNT A 208     -15.294  -3.155   7.090  8.00  0.00           C  
ATOM   3598  C   CNT A 208     -14.207  -3.711   7.800  7.00  0.00           C  
ATOM   3599  C   CNT A 208     -14.207  -3.711   4.960  3.00  0.00           C  
ATOM   3600  C   CNT A 208     -13.000  -3.902   5.670  2.00  0.00           C  
ATOM   3601  C   CNT A 208     -13.001  -3.902   7.090  6.00  0.00           C  
ATOM   3602  C   CNT A 208     -11.795  -3.709   7.800  0.00  0.00           C  
ATOM   3603  C   CNT A 208     -11.795  -3.709   4.960  9.00  0.00           C  
ATOM   3604  C   CNT A 208     -10.709  -3.151   5.670  0.00  0.00           C  
ATOM   3605  C   CNT A 208     -10.709  -3.151   7.090  8.00  0.00           C  
ATOM   3606  C   CNT A 208      -9.847  -2.286   7.800  3.00  0.00           C  
ATOM   3607  C   CNT A 208      -9.847  -2.286   4.960  9.00  0.00           C  
ATOM   3608  C   CNT A 208      -9.292  -1.198   5.670  2.00  0.00           C  
ATOM   3609  C   CNT A 208      -9.292  -1.199   7.090  8.00  0.00           C  
ATOM   3610  C   CNT A 208      -9.099   0.007   7.800  9.00  0.00           C  
ATOM   3611  C   CNT A 208      -9.099   0.007   9.210  6.00  0.00           C  
ATOM   3612  C   CNT A 208      -9.289   1.213   9.920  9.00  0.00           C  
ATOM   3613  C   CNT A 208      -9.289   1.213  11.340  3.00  0.00           C  
ATOM   3614  C   CNT A 208      -9.843   2.301  12.050  5.00  0.00           C  
ATOM   3615  C   CNT A 208      -9.843   2.301   9.210  4.00  0.00           C  
ATOM   3616  C   CNT A 208     -10.705   3.164   9.920  7.00  0.00           C  
ATOM   3617  C   CNT A 208     -10.705   3.165  11.340  3.00  0.00           C  
ATOM   3618  C   CNT A 208     -11.792   3.720  12.050  7.00  0.00           C  
ATOM   3619  C   CNT A 208     -11.793   3.719   9.210  3.00  0.00           C  
ATOM   3620  C   CNT A 208     -12.999   3.910   9.920  0.00  0.00           C  
ATOM   3621  C   CNT A 208     -12.999   3.910  11.340  4.00  0.00           C  
ATOM   3622  C   CNT A 208     -14.204   3.717  12.050  8.00  0.00           C  
ATOM   3623  C   CNT A 208     -14.205   3.718   9.210  2.00  0.00           C  
ATOM   3624  C   CNT A 208     -15.292   3.163   9.920  2.00  0.00           C  
ATOM   3625  C   CNT A 208     -15.292   3.163  11.340  6.00  0.00           C  
ATOM   3626  C   CNT A 208     -16.155   2.300  12.050  3.00  0.00           C  
ATOM   3627  C   CNT A 208     -16.156   2.300   9.210  6.00  0.00           C  
ATOM   3628  C   CNT A 208     -16.708   1.212   9.920  4.00  0.00           C  
ATOM   3629  C   CNT A 208     -16.708   1.211  11.340  0.00  0.00           C  
ATOM   3630  C   CNT A 208     -16.896   0.005  12.050  4.00  0.00           C  
ATOM   3631  C   CNT A 208     -16.896   0.006   9.210  9.00  0.00           C  
ATOM   3632  C   CNT A 208     -16.705  -1.200   9.920  9.00  0.00           C  
ATOM   3633  C   CNT A 208     -16.705  -1.200  11.340  3.00  0.00           C  
ATOM   3634  C   CNT A 208     -16.155  -2.290  12.050  8.00  0.00           C  
ATOM   3635  C   CNT A 208     -16.155  -2.289   9.210  9.00  0.00           C  
ATOM   3636  C   CNT A 208     -15.294  -3.155   9.920  0.00  0.00           C  
ATOM   3637  C   CNT A 208     -15.294  -3.155  11.340  5.00  0.00           C  
ATOM   3638  C   CNT A 208     -14.207  -3.711  12.050  7.00  0.00           C  
ATOM   3639  C   CNT A 208     -14.207  -3.710   9.210  0.00  0.00           C  
ATOM   3640  C   CNT A 208     -13.001  -3.901   9.920  3.00  0.00           C  
ATOM   3641  C   CNT A 208     -13.000  -3.902  11.340  4.00  0.00           C  
ATOM   3642  C   CNT A 208     -11.795  -3.709  12.050  4.00  0.00           C  
ATOM   3643  C   CNT A 208     -11.795  -3.708   9.210  8.00  0.00           C  
ATOM   3644  C   CNT A 208     -10.709  -3.151   9.920  0.00  0.00           C  
ATOM   3645  C   CNT A 208     -10.709  -3.151  11.340  4.00  0.00           C  
ATOM   3646  C   CNT A 208      -9.847  -2.286  12.050  5.00  0.00           C  
ATOM   3647  C   CNT A 208      -9.847  -2.286   9.210  1.00  0.00           C  
ATOM   3648  C   CNT A 208      -9.292  -1.199   9.920  0.00  0.00           C  
ATOM   3649  C   CNT A 208      -9.292  -1.199  11.340  8.00  0.00           C  
ATOM   3650  C   CNT A 208      -9.099   0.007  12.050  5.00  0.00           C  
ATOM   3651  C   CNT A 208      -9.099   0.007  13.470  9.00  0.00           C  
ATOM   3652  C   CNT A 208      -9.288   1.213  14.170  7.00  0.00           C  
ATOM   3653  C   CNT A 208      -9.288   1.213  15.590  6.00  0.00           C  
ATOM   3654  C   CNT A 208      -9.842   2.301  16.300  1.00  0.00           C  
ATOM   3655  C   CNT A 208      -9.842   2.301  13.470  1.00  0.00           C  
ATOM   3656  C   CNT A 208     -10.704   3.165  14.170  2.00  0.00           C  
ATOM   3657  C   CNT A 208     -10.704   3.165  15.590  5.00  0.00           C  
ATOM   3658  C   CNT A 208     -11.792   3.720  16.300  1.00  0.00           C  
ATOM   3659  C   CNT A 208     -11.792   3.720  13.470  3.00  0.00           C  
ATOM   3660  C   CNT A 208     -12.998   3.910  14.170  1.00  0.00           C  
ATOM   3661  C   CNT A 208     -12.998   3.910  15.590  6.00  0.00           C  
ATOM   3662  C   CNT A 208     -14.203   3.718  16.300  1.00  0.00           C  
ATOM   3663  C   CNT A 208     -14.204   3.717  13.470  7.00  0.00           C  
ATOM   3664  C   CNT A 208     -15.291   3.162  14.170  7.00  0.00           C  
ATOM   3665  C   CNT A 208     -15.290   3.162  15.590  6.00  0.00           C  
ATOM   3666  C   CNT A 208     -16.153   2.298  16.300  4.00  0.00           C  
ATOM   3667  C   CNT A 208     -16.155   2.299  13.470  4.00  0.00           C  
ATOM   3668  C   CNT A 208     -16.708   1.210  14.170  9.00  0.00           C  
ATOM   3669  C   CNT A 208     -16.706   1.210  15.590  7.00  0.00           C  
ATOM   3670  C   CNT A 208     -16.896   0.004  16.300  8.00  0.00           C  
ATOM   3671  C   CNT A 208     -16.898   0.005  13.470  0.00  0.00           C  
ATOM   3672  C   CNT A 208     -16.707  -1.201  14.170  2.00  0.00           C  
ATOM   3673  C   CNT A 208     -16.705  -1.201  15.590  6.00  0.00           C  
ATOM   3674  C   CNT A 208     -16.155  -2.291  16.300  5.00  0.00           C  
ATOM   3675  C   CNT A 208     -16.156  -2.290  13.470  0.00  0.00           C  
ATOM   3676  C   CNT A 208     -15.294  -3.156  14.170  1.00  0.00           C  
ATOM   3677  C   CNT A 208     -15.294  -3.157  15.590  9.00  0.00           C  
ATOM   3678  C   CNT A 208     -14.206  -3.712  16.300  6.00  0.00           C  
ATOM   3679  C   CNT A 208     -14.207  -3.711  13.470  8.00  0.00           C  
ATOM   3680  C   CNT A 208     -13.000  -3.902  14.170  2.00  0.00           C  
ATOM   3681  C   CNT A 208     -13.000  -3.902  15.590  3.00  0.00           C  
ATOM   3682  C   CNT A 208     -11.795  -3.709  16.300  9.00  0.00           C  
ATOM   3683  C   CNT A 208     -11.795  -3.709  13.470  6.00  0.00           C  
ATOM   3684  C   CNT A 208     -10.708  -3.152  14.170  3.00  0.00           C  
ATOM   3685  C   CNT A 208     -10.708  -3.152  15.590  2.00  0.00           C  
ATOM   3686  C   CNT A 208      -9.847  -2.287  16.300  7.00  0.00           C  
ATOM   3687  C   CNT A 208      -9.847  -2.286  13.470  6.00  0.00           C  
ATOM   3688  C   CNT A 208      -9.292  -1.199  14.170  0.00  0.00           C  
ATOM   3689  C   CNT A 208      -9.292  -1.199  15.590  8.00  0.00           C  
ATOM   3690  C   CNT A 208      -9.099   0.007  16.300  3.00  0.00           C  
ATOM   3691  C   CNT A 208      -9.099   0.006  17.720  0.00  0.00           C  
ATOM   3692  C   CNT A 208      -9.288   1.213  18.420  2.00  0.00           C  
ATOM   3693  C   CNT A 208      -9.287   1.213  19.840  0.00  0.00           C  
ATOM   3694  C   CNT A 208      -9.840   2.302  20.540  3.00  0.00           C  
ATOM   3695  C   CNT A 208      -9.841   2.301  17.710  8.00  0.00           C  
ATOM   3696  C   CNT A 208     -10.703   3.166  18.420  6.00  0.00           C  
ATOM   3697  C   CNT A 208     -10.703   3.166  19.840  3.00  0.00           C  
ATOM   3698  C   CNT A 208     -11.791   3.720  20.540  8.00  0.00           C  
ATOM   3699  C   CNT A 208     -11.791   3.720  17.710  1.00  0.00           C  
ATOM   3700  C   CNT A 208     -12.997   3.910  18.420  6.00  0.00           C  
ATOM   3701  C   CNT A 208     -12.997   3.910  19.840  7.00  0.00           C  
ATOM   3702  C   CNT A 208     -14.203   3.718  20.540  9.00  0.00           C  
ATOM   3703  C   CNT A 208     -14.203   3.718  17.710  8.00  0.00           C  
ATOM   3704  C   CNT A 208     -15.290   3.162  18.420  4.00  0.00           C  
ATOM   3705  C   CNT A 208     -15.291   3.162  19.840  3.00  0.00           C  
ATOM   3706  C   CNT A 208     -16.155   2.300  20.540  2.00  0.00           C  
ATOM   3707  C   CNT A 208     -16.152   2.298  17.710  1.00  0.00           C  
ATOM   3708  C   CNT A 208     -16.706   1.210  18.420  7.00  0.00           C  
ATOM   3709  C   CNT A 208     -16.708   1.211  19.840  1.00  0.00           C  
ATOM   3710  C   CNT A 208     -16.898   0.005  20.540  4.00  0.00           C  
ATOM   3711  C   CNT A 208     -16.895   0.004  17.710  5.00  0.00           C  
ATOM   3712  C   CNT A 208     -16.705  -1.201  18.420  9.00  0.00           C  
ATOM   3713  C   CNT A 208     -16.707  -1.201  19.840  1.00  0.00           C  
ATOM   3714  C   CNT A 208     -16.156  -2.291  20.540  1.00  0.00           C  
ATOM   3715  C   CNT A 208     -16.155  -2.291  17.710  8.00  0.00           C  
ATOM   3716  C   CNT A 208     -15.294  -3.157  18.420  9.00  0.00           C  
ATOM   3717  C   CNT A 208     -15.294  -3.156  19.840  1.00  0.00           C  
ATOM   3718  C   CNT A 208     -14.206  -3.712  20.540  0.00  0.00           C  
ATOM   3719  C   CNT A 208     -14.206  -3.712  17.710  3.00  0.00           C  
ATOM   3720  C   CNT A 208     -13.000  -3.902  18.420  2.00  0.00           C  
ATOM   3721  C   CNT A 208     -13.000  -3.903  19.840  4.00  0.00           C  
ATOM   3722  C   CNT A 208     -11.794  -3.710  20.550  5.00  0.00           C  
ATOM   3723  C   CNT A 208     -11.794  -3.709  17.720  6.00  0.00           C  
ATOM   3724  C   CNT A 208     -10.708  -3.152  18.420  6.00  0.00           C  
ATOM   3725  C   CNT A 208     -10.708  -3.152  19.840  2.00  0.00           C  
ATOM   3726  C   CNT A 208      -9.846  -2.287  20.550  9.00  0.00           C  
ATOM   3727  C   CNT A 208      -9.846  -2.287  17.720  7.00  0.00           C  
ATOM   3728  C   CNT A 208      -9.292  -1.199  18.420  6.00  0.00           C  
ATOM   3729  C   CNT A 208      -9.292  -1.199  19.840  4.00  0.00           C  
ATOM   3730  C   CNT A 208      -9.099   0.006  20.550  2.00  0.00           C  
ATOM   3731  C   CNT A 208      -9.098   0.006  21.960  7.00  0.00           C  
ATOM   3732  C   CNT A 208      -9.287   1.213  22.670  8.00  0.00           C  
ATOM   3733  C   CNT A 208      -9.287   1.213  24.080  7.00  0.00           C  
ATOM   3734  C   CNT A 208      -9.840   2.302  24.780  7.00  0.00           C  
ATOM   3735  C   CNT A 208      -9.840   2.301  21.960  5.00  0.00           C  
ATOM   3736  C   CNT A 208     -10.703   3.166  22.660  6.00  0.00           C  
ATOM   3737  C   CNT A 208     -10.703   3.166  24.080  7.00  0.00           C  
ATOM   3738  C   CNT A 208     -11.791   3.722  24.780  6.00  0.00           C  
ATOM   3739  C   CNT A 208     -11.791   3.720  21.960  0.00  0.00           C  
ATOM   3740  C   CNT A 208     -12.997   3.911  22.660  4.00  0.00           C  
ATOM   3741  C   CNT A 208     -12.997   3.912  24.080  0.00  0.00           C  
ATOM   3742  C   CNT A 208     -14.203   3.721  24.780  7.00  0.00           C  
ATOM   3743  C   CNT A 208     -14.203   3.719  21.960  5.00  0.00           C  
ATOM   3744  C   CNT A 208     -15.292   3.165  22.660  2.00  0.00           C  
ATOM   3745  C   CNT A 208     -15.291   3.167  24.080  7.00  0.00           C  
ATOM   3746  C   CNT A 208     -16.155   2.303  24.780  8.00  0.00           C  
ATOM   3747  C   CNT A 208     -16.155   2.301  21.960  4.00  0.00           C  
ATOM   3748  C   CNT A 208     -16.708   1.212  22.660  1.00  0.00           C  
ATOM   3749  C   CNT A 208     -16.707   1.214  24.080  6.00  0.00           C  
ATOM   3750  C   CNT A 208     -16.894   0.007  24.780  0.00  0.00           C  
ATOM   3751  C   CNT A 208     -16.896   0.006  21.960  8.00  0.00           C  
ATOM   3752  C   CNT A 208     -16.706  -1.200  22.660  4.00  0.00           C  
ATOM   3753  C   CNT A 208     -16.704  -1.199  24.080  0.00  0.00           C  
ATOM   3754  C   CNT A 208     -16.154  -2.289  24.780  6.00  0.00           C  
ATOM   3755  C   CNT A 208     -16.155  -2.290  21.960  4.00  0.00           C  
ATOM   3756  C   CNT A 208     -15.294  -3.156  22.660  9.00  0.00           C  
ATOM   3757  C   CNT A 208     -15.293  -3.157  24.080  4.00  0.00           C  
ATOM   3758  C   CNT A 208     -14.206  -3.713  24.780  9.00  0.00           C  
ATOM   3759  C   CNT A 208     -14.206  -3.711  21.960  3.00  0.00           C  
ATOM   3760  C   CNT A 208     -13.000  -3.902  22.670  8.00  0.00           C  
ATOM   3761  C   CNT A 208     -12.999  -3.904  24.080  6.00  0.00           C  
ATOM   3762  C   CNT A 208     -11.794  -3.711  24.790  3.00  0.00           C  
ATOM   3763  C   CNT A 208     -11.794  -3.710  21.960  8.00  0.00           C  
ATOM   3764  C   CNT A 208     -10.707  -3.153  22.670  8.00  0.00           C  
ATOM   3765  C   CNT A 208     -10.707  -3.153  24.080  1.00  0.00           C  
ATOM   3766  C   CNT A 208      -9.847  -2.287  24.790  6.00  0.00           C  
ATOM   3767  C   CNT A 208      -9.846  -2.287  21.960  9.00  0.00           C  
ATOM   3768  C   CNT A 208      -9.291  -1.199  22.670  8.00  0.00           C  
ATOM   3769  C   CNT A 208      -9.292  -1.199  24.080  8.00  0.00           C  
ATOM   3770  C   CNT A 208      -9.098   0.007  24.790  0.00  0.00           C  
ATOM   3771  C   CNT A 208      -9.099   0.008  26.200  5.00  0.00           C  
ATOM   3772  C   CNT A 208      -9.288   1.215  26.900  6.00  0.00           C  
ATOM   3773  C   CNT A 208      -9.290   1.217  28.320  9.00  0.00           C  
ATOM   3774  C   CNT A 208      -9.842   2.308  29.020  9.00  0.00           C  
ATOM   3775  C   CNT A 208      -9.840   2.304  26.200  8.00  0.00           C  
ATOM   3776  C   CNT A 208     -10.702   3.170  26.900  8.00  0.00           C  
ATOM   3777  C   CNT A 208     -10.702   3.174  28.310  3.00  0.00           C  
ATOM   3778  C   CNT A 208     -11.788   3.734  29.020  4.00  0.00           C  
ATOM   3779  C   CNT A 208     -11.790   3.724  26.200  7.00  0.00           C  
ATOM   3780  C   CNT A 208     -12.996   3.917  26.900  2.00  0.00           C  
ATOM   3781  C   CNT A 208     -12.994   3.922  28.310  7.00  0.00           C  
ATOM   3782  C   CNT A 208     -14.200   3.732  29.010  7.00  0.00           C  
ATOM   3783  C   CNT A 208     -14.202   3.724  26.190  9.00  0.00           C  
ATOM   3784  C   CNT A 208     -15.290   3.170  26.900  4.00  0.00           C  
ATOM   3785  C   CNT A 208     -15.287   3.175  28.310  1.00  0.00           C  
ATOM   3786  C   CNT A 208     -16.149   2.309  29.010  4.00  0.00           C  
ATOM   3787  C   CNT A 208     -16.153   2.306  26.190  5.00  0.00           C  
ATOM   3788  C   CNT A 208     -16.706   1.216  26.900  6.00  0.00           C  
ATOM   3789  C   CNT A 208     -16.702   1.220  28.310  5.00  0.00           C  
ATOM   3790  C   CNT A 208     -16.890   0.013  29.010  1.00  0.00           C  
ATOM   3791  C   CNT A 208     -16.895   0.009  26.190  1.00  0.00           C  
ATOM   3792  C   CNT A 208     -16.703  -1.197  26.900  5.00  0.00           C  
ATOM   3793  C   CNT A 208     -16.699  -1.195  28.310  4.00  0.00           C  
ATOM   3794  C   CNT A 208     -16.151  -2.286  29.010  4.00  0.00           C  
ATOM   3795  C   CNT A 208     -16.153  -2.289  26.190  3.00  0.00           C  
ATOM   3796  C   CNT A 208     -15.293  -3.156  26.900  4.00  0.00           C  
ATOM   3797  C   CNT A 208     -15.291  -3.156  28.310  7.00  0.00           C  
ATOM   3798  C   CNT A 208     -14.207  -3.716  29.020  3.00  0.00           C  
ATOM   3799  C   CNT A 208     -14.206  -3.715  26.200  9.00  0.00           C  
ATOM   3800  C   CNT A 208     -13.001  -3.908  26.900  7.00  0.00           C  
ATOM   3801  C   CNT A 208     -12.999  -3.910  28.320  4.00  0.00           C  
ATOM   3802  C   CNT A 208     -11.795  -3.716  29.020  0.00  0.00           C  
ATOM   3803  C   CNT A 208     -11.794  -3.712  26.200  7.00  0.00           C  
ATOM   3804  C   CNT A 208     -10.712  -3.150  26.910  1.00  0.00           C  
ATOM   3805  C   CNT A 208     -10.713  -3.151  28.320  0.00  0.00           C  
ATOM   3806  C   CNT A 208      -9.855  -2.283  29.020  3.00  0.00           C  
ATOM   3807  C   CNT A 208      -9.850  -2.285  26.200  3.00  0.00           C  
ATOM   3808  C   CNT A 208      -9.295  -1.197  26.910  5.00  0.00           C  
ATOM   3809  C   CNT A 208      -9.298  -1.197  28.320  3.00  0.00           C  
ATOM   3810  C   CNT A 208      -9.105   0.010  29.020  8.00  0.00           C  
ATOM   3811  C   CNT A 208      -9.112   0.010  30.430  4.00  0.00           C  
ATOM   3812  C   CNT A 208      -9.300   1.220  31.130  6.00  0.00           C  
ATOM   3813  C   CNT A 208      -9.305   1.223  32.530  2.00  0.00           C  
ATOM   3814  C   CNT A 208      -9.850   2.316  33.240  7.00  0.00           C  
ATOM   3815  C   CNT A 208      -9.845   2.312  30.430  5.00  0.00           C  
ATOM   3816  C   CNT A 208     -10.700   3.185  31.130  4.00  0.00           C  
ATOM   3817  C   CNT A 208     -10.701   3.194  32.540  6.00  0.00           C  
ATOM   3818  C   CNT A 208     -11.780   3.761  33.250  4.00  0.00           C  
ATOM   3819  C   CNT A 208     -11.786   3.743  30.430  1.00  0.00           C  
ATOM   3820  C   CNT A 208     -12.991   3.938  31.130  9.00  0.00           C  
ATOM   3821  C   CNT A 208     -12.986   3.947  32.540  2.00  0.00           C  
ATOM   3822  C   CNT A 208     -14.190   3.743  33.250  1.00  0.00           C  
ATOM   3823  C   CNT A 208     -14.195   3.738  30.430  2.00  0.00           C  
ATOM   3824  C   CNT A 208     -15.280   3.177  31.130  8.00  0.00           C  
ATOM   3825  C   CNT A 208     -15.271   3.178  32.540  0.00  0.00           C  
ATOM   3826  C   CNT A 208     -16.135   2.309  33.220  8.00  0.00           C  
ATOM   3827  C   CNT A 208     -16.142   2.313  30.420  1.00  0.00           C  
ATOM   3828  C   CNT A 208     -16.695   1.222  31.120  1.00  0.00           C  
ATOM   3829  C   CNT A 208     -16.691   1.224  32.520  4.00  0.00           C  
ATOM   3830  C   CNT A 208     -16.893   0.017  33.210  1.00  0.00           C  
ATOM   3831  C   CNT A 208     -16.887   0.016  30.410  3.00  0.00           C  
ATOM   3832  C   CNT A 208     -16.701  -1.191  31.110  6.00  0.00           C  
ATOM   3833  C   CNT A 208     -16.707  -1.190  32.520  6.00  0.00           C  
ATOM   3834  C   CNT A 208     -16.168  -2.285  33.210  3.00  0.00           C  
ATOM   3835  C   CNT A 208     -16.150  -2.284  30.420  5.00  0.00           C  
ATOM   3836  C   CNT A 208     -15.293  -3.152  31.120  0.00  0.00           C  
ATOM   3837  C   CNT A 208     -15.297  -3.150  32.530  0.00  0.00           C  
ATOM   3838  C   CNT A 208     -14.216  -3.707  33.240  3.00  0.00           C  
ATOM   3839  C   CNT A 208     -14.204  -3.714  30.430  9.00  0.00           C  
ATOM   3840  C   CNT A 208     -13.001  -3.907  31.140  4.00  0.00           C  
ATOM   3841  C   CNT A 208     -13.003  -3.901  32.550  6.00  0.00           C  
ATOM   3842  C   CNT A 208     -11.804  -3.698  33.260  2.00  0.00           C  
ATOM   3843  C   CNT A 208     -11.792  -3.719  30.440  9.00  0.00           C  
ATOM   3844  C   CNT A 208     -10.709  -3.157  31.140  2.00  0.00           C  
ATOM   3845  C   CNT A 208     -10.713  -3.152  32.560  1.00  0.00           C  
ATOM   3846  C   CNT A 208      -9.861  -2.276  33.260  8.00  0.00           C  
ATOM   3847  C   CNT A 208      -9.852  -2.288  30.440  2.00  0.00           C  
ATOM   3848  C   CNT A 208      -9.303  -1.196  31.130  4.00  0.00           C  
ATOM   3849  C   CNT A 208      -9.306  -1.194  32.540  8.00  0.00           C  
ATOM   3850  C   CNT A 208      -9.103   0.017  33.230  8.00  0.00           C  
ATOM   3851  C   CNT A 208      -9.068   0.024  34.630  9.00  0.00           C  
ATOM   3852  C   CNT A 208      -9.211   1.248  35.310  1.00  0.00           C  
ATOM   3853  C   CNT A 208      -9.085   1.282  36.720  1.00  0.00           C  
ATOM   3854  C   CNT A 208      -9.540   2.474  37.300  7.00  0.00           C  
ATOM   3855  C   CNT A 208      -9.842   2.319  34.640  1.00  0.00           C  
ATOM   3856  C   CNT A 208     -10.703   3.186  35.360  6.00  0.00           C  
ATOM   3857  C   CNT A 208     -10.666   3.148  36.780  8.00  0.00           C  
ATOM   3858  C   CNT A 208     -11.791   3.665  37.510  6.00  0.00           C  
ATOM   3859  C   CNT A 208     -11.776   3.767  34.670  5.00  0.00           C  
ATOM   3860  C   CNT A 208     -12.977   3.966  35.380  1.00  0.00           C  
ATOM   3861  C   CNT A 208     -13.004   3.964  36.810  9.00  0.00           C  
ATOM   3862  C   CNT A 208     -14.311   3.966  37.350  7.00  0.00           C  
ATOM   3863  C   CNT A 208     -14.187   3.750  34.660  4.00  0.00           C  
ATOM   3864  C   CNT A 208     -15.305   3.208  35.330  9.00  0.00           C  
ATOM   3865  C   CNT A 208     -15.367   3.265  36.740  6.00  0.00           C  
ATOM   3866  C   CNT A 208     -16.351   2.444  37.320  5.00  0.00           C  
ATOM   3867  C   CNT A 208     -16.143   2.314  34.630  9.00  0.00           C  
ATOM   3868  C   CNT A 208     -16.729   1.231  35.310  6.00  0.00           C  
ATOM   3869  C   CNT A 208     -16.789   1.247  36.730  5.00  0.00           C  
ATOM   3870  C   CNT A 208     -17.112   0.012  37.320  9.00  0.00           C  
ATOM   3871  C   CNT A 208     -16.906   0.017  34.620  6.00  0.00           C  
ATOM   3872  C   CNT A 208     -16.759  -1.204  35.310  4.00  0.00           C  
ATOM   3873  C   CNT A 208     -16.819  -1.226  36.720  2.00  0.00           C  
ATOM   3874  C   CNT A 208     -16.405  -2.436  37.310  8.00  0.00           C  
ATOM   3875  C   CNT A 208     -16.194  -2.295  34.620  3.00  0.00           C  
ATOM   3876  C   CNT A 208     -15.363  -3.197  35.310  8.00  0.00           C  
ATOM   3877  C   CNT A 208     -15.429  -3.262  36.720  2.00  0.00           C  
ATOM   3878  C   CNT A 208     -14.367  -3.959  37.320  9.00  0.00           C  
ATOM   3879  C   CNT A 208     -14.232  -3.709  34.640  5.00  0.00           C  
ATOM   3880  C   CNT A 208     -13.028  -3.887  35.360  5.00  0.00           C  
ATOM   3881  C   CNT A 208     -13.067  -3.943  36.770  2.00  0.00           C  
ATOM   3882  C   CNT A 208     -11.855  -3.696  37.480  7.00  0.00           C  
ATOM   3883  C   CNT A 208     -11.819  -3.671  34.680  0.00  0.00           C  
ATOM   3884  C   CNT A 208     -10.759  -3.085  35.390  4.00  0.00           C  
ATOM   3885  C   CNT A 208     -10.748  -3.070  36.820  0.00  0.00           C  
ATOM   3886  C   CNT A 208      -9.690  -2.320  37.380  6.00  0.00           C  
ATOM   3887  C   CNT A 208      -9.867  -2.258  34.670  5.00  0.00           C  
ATOM   3888  C   CNT A 208      -9.241  -1.184  35.340  8.00  0.00           C  
ATOM   3889  C   CNT A 208      -9.160  -1.179  36.750  1.00  0.00           C  
ATOM   3890  C   CNT A 208      -8.766   0.049  37.310  9.00  0.00           C  
ATOM   3891  N   LIG A 209      -9.790   3.165 -39.700  4.00  0.00           N  
ATOM   3892  N   LIG A 209     -14.115  -3.026 -39.710  0.00  0.00           N  
ATOM   3893  N   LIG A 209     -12.205   4.457  39.700  0.00  0.00           N  
ATOM   3894  N   LIG A 209     -11.784  -3.025  39.720  1.00  0.00           N  
ATOM   3895  C   LIG A 209     -10.044   1.918 -39.050  6.00  0.00           C  
ATOM   3896  C   LIG A 209     -14.312  -4.169 -38.920  1.00  0.00           C  
ATOM   3897  C   LIG A 209     -11.893   3.258  39.000  1.00  0.00           C  
ATOM   3898  C   LIG A 209     -11.796  -4.183  38.930  5.00  0.00           C  
ATOM   3899  O   LIG A 209     -10.296   0.838 -39.170  1.00  0.00           O  
ATOM   3900  O   LIG A 209     -14.522  -5.309 -38.780  8.00  0.00           O  
ATOM   3901  O   LIG A 209     -11.682   2.137  39.040  9.00  0.00           O  
ATOM   3902  O   LIG A 209     -11.805  -5.339  38.790  7.00  0.00           O  
ATOM   3903  C1  LIG A 209      -9.461   3.011 -41.160  5.00  0.00           C  
ATOM   3904  C1  LIG A 209     -13.801  -3.186 -41.170  2.00  0.00           C  
ATOM   3905  C1  LIG A 209     -12.315   4.385  41.190  7.00  0.00           C  
ATOM   3906  C1  LIG A 209     -12.139  -3.171  41.170  2.00  0.00           C  
ATOM   3907  N1  LIG A 209     -10.386   2.077 -43.370  4.00  0.00           N  
ATOM   3908  N1  LIG A 209     -14.786  -4.012 -43.380  1.00  0.00           N  
ATOM   3909  N1  LIG A 209     -11.156   3.626  43.310  0.00  0.00           N  
ATOM   3910  N1  LIG A 209     -11.195  -4.056  43.370  7.00  0.00           N  
ATOM   3911  O1  LIG A 209      -9.606   1.966 -47.930  9.00  0.00           O  
ATOM   3912  O1  LIG A 209     -14.077  -4.042 -47.960  4.00  0.00           O  
ATOM   3913  O1  LIG A 209     -11.891   3.483  47.910  9.00  0.00           O  
ATOM   3914  O1  LIG A 209     -11.987  -4.351  47.930  3.00  0.00           O  
ATOM   3915  C2  LIG A 209     -10.687   2.568 -42.000  3.00  0.00           C  
ATOM   3916  C2  LIG A 209     -15.056  -3.545 -42.000  0.00  0.00           C  
ATOM   3917  C2  LIG A 209     -10.978   4.094  41.920  9.00  0.00           C  
ATOM   3918  C2  LIG A 209     -10.899  -3.541  42.020  0.00  0.00           C  
ATOM   3919  N2  LIG A 209     -10.065   0.667 -45.100  2.00  0.00           N  
ATOM   3920  N2  LIG A 209     -14.570  -5.381 -45.160  3.00  0.00           N  
ATOM   3921  N2  LIG A 209     -11.390   2.216  45.050  1.00  0.00           N  
ATOM   3922  N2  LIG A 209     -11.474  -5.524  45.060  4.00  0.00           N  
ATOM   3923  C3  LIG A 209     -10.350   0.767 -43.790  1.00  0.00           C  
ATOM   3924  C3  LIG A 209     -14.779  -5.313 -43.840  7.00  0.00           C  
ATOM   3925  C3  LIG A 209     -11.167   2.317  43.730  0.00  0.00           C  
ATOM   3926  C3  LIG A 209     -11.218  -5.379  43.750  1.00  0.00           C  
ATOM   3927  N3  LIG A 209     -10.188   4.203 -44.600  3.00  0.00           N  
ATOM   3928  N3  LIG A 209     -14.514  -1.866 -44.570  8.00  0.00           N  
ATOM   3929  N3  LIG A 209     -11.361   5.743  44.580  5.00  0.00           N  
ATOM   3930  N3  LIG A 209     -11.447  -1.971  44.680  3.00  0.00           N  
ATOM   3931  C4  LIG A 209     -10.003   1.984 -45.560  8.00  0.00           C  
ATOM   3932  C4  LIG A 209     -14.462  -4.062 -45.590  6.00  0.00           C  
ATOM   3933  C4  LIG A 209     -11.505   3.517  45.520  0.00  0.00           C  
ATOM   3934  C4  LIG A 209     -11.588  -4.230  45.560  5.00  0.00           C  
ATOM   3935  N4  LIG A 209      -9.776   3.899 -46.920  6.00  0.00           N  
ATOM   3936  N4  LIG A 209     -14.189  -2.133 -46.910  0.00  0.00           N  
ATOM   3937  N4  LIG A 209     -11.767   5.405  46.900  6.00  0.00           N  
ATOM   3938  N4  LIG A 209     -11.843  -2.388  46.990  0.00  0.00           N  
ATOM   3939  C5  LIG A 209     -10.200   2.824 -44.500  4.00  0.00           C  
ATOM   3940  C5  LIG A 209     -14.595  -3.245 -44.500  8.00  0.00           C  
ATOM   3941  C5  LIG A 209     -11.341   4.366  44.460  0.00  0.00           C  
ATOM   3942  C5  LIG A 209     -11.413  -3.348  44.530  1.00  0.00           C  
ATOM   3943  N5  LIG A 209      -9.939   5.932 -46.010  5.00  0.00           N  
ATOM   3944  N5  LIG A 209     -14.142  -0.118 -45.930  7.00  0.00           N  
ATOM   3945  N5  LIG A 209     -11.596   7.440  46.040  9.00  0.00           N  
ATOM   3946  N5  LIG A 209     -11.717  -0.332  46.230  4.00  0.00           N  
ATOM   3947  C6  LIG A 209      -9.787   2.577 -46.900  8.00  0.00           C  
ATOM   3948  C6  LIG A 209     -14.238  -3.452 -46.910  2.00  0.00           C  
ATOM   3949  C6  LIG A 209     -11.739   4.085  46.870  0.00  0.00           C  
ATOM   3950  C6  LIG A 209     -11.825  -3.702  46.920  5.00  0.00           C  
ATOM   3951  C7  LIG A 209      -9.978   4.634 -45.830  9.00  0.00           C  
ATOM   3952  C7  LIG A 209     -14.325  -1.412 -45.800  9.00  0.00           C  
ATOM   3953  C7  LIG A 209     -11.602   6.151  45.810  3.00  0.00           C  
ATOM   3954  C7  LIG A 209     -11.668  -1.606  45.940  2.00  0.00           C  
ATOM   3955  H   LIG A 209      -9.167   3.834 -39.250  5.00  0.00           H  
ATOM   3956  H   LIG A 209     -13.718  -2.175 -39.310  9.00  0.00           H  
ATOM   3957  H   LIG A 209     -12.002   5.379  39.320  6.00  0.00           H  
ATOM   3958  H   LIG A 209     -12.096  -2.133  39.340  7.00  0.00           H  
ATOM   3959  H1  LIG A 209      -8.662   2.270 -41.280  9.00  0.00           H  
ATOM   3960  H1  LIG A 209     -13.041  -3.964 -41.300  6.00  0.00           H  
ATOM   3961  H1  LIG A 209     -13.011   3.579  41.440  5.00  0.00           H  
ATOM   3962  H1  LIG A 209     -12.908  -3.943  41.300  7.00  0.00           H  
ATOM   3963  H2  LIG A 209      -9.083   3.958 -41.560  7.00  0.00           H  
ATOM   3964  H2  LIG A 209     -13.387  -2.255 -41.570  5.00  0.00           H  
ATOM   3965  H2  LIG A 209     -12.737   5.316  41.590  5.00  0.00           H  
ATOM   3966  H2  LIG A 209     -12.554  -2.236  41.570  5.00  0.00           H  
ATOM   3967  H3  LIG A 209     -11.356   3.431 -42.090  0.00  0.00           H  
ATOM   3968  H3  LIG A 209     -15.678  -2.645 -42.070  5.00  0.00           H  
ATOM   3969  H3  LIG A 209     -10.365   5.000  41.940  6.00  0.00           H  
ATOM   3970  H3  LIG A 209     -10.274  -2.647  42.120  2.00  0.00           H  
ATOM   3971  H4  LIG A 209     -11.236   1.790 -41.470  2.00  0.00           H  
ATOM   3972  H4  LIG A 209     -15.634  -4.308 -41.480  5.00  0.00           H  
ATOM   3973  H4  LIG A 209     -10.422   3.325  41.380  1.00  0.00           H  
ATOM   3974  H4  LIG A 209     -10.324  -4.299  41.480  8.00  0.00           H  
ATOM   3975  H5  LIG A 209     -10.530  -0.064 -43.120  4.00  0.00           H  
ATOM   3976  H5  LIG A 209     -14.932  -6.162 -43.190  9.00  0.00           H  
ATOM   3977  H5  LIG A 209     -11.014   1.489  43.050  7.00  0.00           H  
ATOM   3978  H5  LIG A 209     -11.048  -6.190  43.060  8.00  0.00           H  
ATOM   3979  H6  LIG A 209      -9.704   4.353 -47.800  2.00  0.00           H  
ATOM   3980  H6  LIG A 209     -14.077  -1.686 -47.790  2.00  0.00           H  
ATOM   3981  H6  LIG A 209     -11.887   5.847  47.780  1.00  0.00           H  
ATOM   3982  H6  LIG A 209     -11.901  -1.989  47.910  9.00  0.00           H  
ATOM   3983  H7  LIG A 209     -10.005   6.423 -45.130  2.00  0.00           H  
ATOM   3984  H7  LIG A 209     -14.472   0.436 -45.150  0.00  0.00           H  
ATOM   3985  H7  LIG A 209     -11.627   7.942  45.160  0.00  0.00           H  
ATOM   3986  H7  LIG A 209     -11.561   0.332  45.470  9.00  0.00           H  
ATOM   3987  H8  LIG A 209      -9.248   6.310 -46.640  6.00  0.00           H  
ATOM   3988  H8  LIG A 209     -14.046   0.317 -46.830  6.00  0.00           H  
ATOM   3989  H8  LIG A 209     -12.248   7.787  46.720  7.00  0.00           H  
ATOM   3990  H8  LIG A 209     -12.228  -0.006  47.020  7.00  0.00           H  
END
