# Supplementary material for: Molecular Dynamics Study of the Interaction of Carbon Nanotubes with Telomeric DNA Fragment Containing Noncanonical G-Quadruplex and i-Motif Forms
Source: Int J Mol Sci. 2020 Mar 11;21(6):1925. doi: 10.3390/ijms21061925 (PMC7139311; doi:10.3390/ijms21061925)
Supplement: Supplementary file 1 [file ijms-21-01925-s001.zip › fig1_B.pdb]

HEADER    GIa_eq10
ATOM      1  C5' DG5 A   1     -55.322  13.368   4.840  3.00  0.00           C  
ATOM      2  O5' DG5 A   1     -54.971  13.524   3.530  8.00  0.00           O  
ATOM      3  C4' DG5 A   1     -54.212  12.558   5.570  0.00  0.00           C  
ATOM      4  O4' DG5 A   1     -54.203  11.197   5.190  9.00  0.00           O  
ATOM      5  C3' DG5 A   1     -52.720  12.943   5.430  4.00  0.00           C  
ATOM      6  O3' DG5 A   1     -52.100  12.788   6.720  1.00  0.00           O  
ATOM      7  C2' DG5 A   1     -52.118  11.985   4.350  7.00  0.00           C  
ATOM      8  C1' DG5 A   1     -52.944  10.755   4.570  5.00  0.00           C  
ATOM      9  N1  DG5 A   1     -51.015   6.486   2.490  9.00  0.00           N  
ATOM     10  C2  DG5 A   1     -50.688   7.229   3.570  3.00  0.00           C  
ATOM     11  N2  DG5 A   1     -49.558   6.888   4.110  7.00  0.00           N  
ATOM     12  N3  DG5 A   1     -51.083   8.468   3.810  2.00  0.00           N  
ATOM     13  C4  DG5 A   1     -52.250   8.698   3.110  5.00  0.00           C  
ATOM     14  C5  DG5 A   1     -52.777   7.967   2.080  4.00  0.00           C  
ATOM     15  C6  DG5 A   1     -52.066   6.826   1.630  3.00  0.00           C  
ATOM     16  O6  DG5 A   1     -52.376   5.947   0.750  9.00  0.00           O  
ATOM     17  N7  DG5 A   1     -54.030   8.518   1.710  4.00  0.00           N  
ATOM     18  C8  DG5 A   1     -54.064   9.689   2.390  0.00  0.00           C  
ATOM     19  N9  DG5 A   1     -53.045   9.839   3.330  2.00  0.00           N  
ATOM     20 HO5' DG5 A   1     -55.644  13.122   2.930  6.00  0.00           H  
ATOM     21  H1  DG5 A   1     -50.453   5.744   2.210  8.00  0.00           H  
ATOM     22  H8  DG5 A   1     -54.995  10.260   2.520  8.00  0.00           H  
ATOM     23  H1' DG5 A   1     -52.282  10.257   5.270  1.00  0.00           H  
ATOM     24  H2' DG5 A   1     -52.315  12.417   3.370  7.00  0.00           H  
ATOM     25  H21 DG5 A   1     -48.906   6.279   3.690  5.00  0.00           H  
ATOM     26  H3' DG5 A   1     -52.682  14.003   5.110  2.00  0.00           H  
ATOM     27  H22 DG5 A   1     -49.092   7.541   4.720  4.00  0.00           H  
ATOM     28  H4' DG5 A   1     -54.513  12.597   6.630  9.00  0.00           H  
ATOM     29  H5' DG5 A   1     -56.250  12.819   4.830  7.00  0.00           H  
ATOM     30 H2'' DG5 A   1     -51.024  11.820   4.430  5.00  0.00           H  
ATOM     31 H5'' DG5 A   1     -55.411  14.273   5.400  3.00  0.00           H  
ATOM     32  P    DG A   2     -50.723  13.534   7.030  7.00  0.00           P  
ATOM     33  C5'  DG A   2     -48.250  12.305   6.850  5.00  0.00           C  
ATOM     34  O5'  DG A   2     -49.613  12.557   6.370  3.00  0.00           O  
ATOM     35  C4'  DG A   2     -47.248  12.360   5.700  9.00  0.00           C  
ATOM     36  O4'  DG A   2     -47.655  11.418   4.680  3.00  0.00           O  
ATOM     37  C3'  DG A   2     -47.293  13.679   4.970  7.00  0.00           C  
ATOM     38  O3'  DG A   2     -45.966  14.158   4.490  1.00  0.00           O  
ATOM     39  C2'  DG A   2     -48.114  13.370   3.710  3.00  0.00           C  
ATOM     40  C1'  DG A   2     -47.597  12.017   3.380  0.00  0.00           C  
ATOM     41  N1   DG A   2     -47.958   7.840   0.460  7.00  0.00           N  
ATOM     42  C2   DG A   2     -47.007   8.207   1.340  6.00  0.00           C  
ATOM     43  N2   DG A   2     -45.886   7.562   1.370  7.00  0.00           N  
ATOM     44  N3   DG A   2     -47.081   9.298   2.040  0.00  0.00           N  
ATOM     45  C4   DG A   2     -48.216  10.063   1.840  6.00  0.00           C  
ATOM     46  C5   DG A   2     -49.245   9.797   0.930  4.00  0.00           C  
ATOM     47  C6   DG A   2     -49.073   8.600   0.180  3.00  0.00           C  
ATOM     48  O6   DG A   2     -49.798   8.028  -0.610  1.00  0.00           O  
ATOM     49  N7   DG A   2     -50.186  10.864   0.960  4.00  0.00           N  
ATOM     50  C8   DG A   2     -49.668  11.661   1.810  3.00  0.00           C  
ATOM     51  N9   DG A   2     -48.415  11.325   2.310  3.00  0.00           N  
ATOM     52  OP1  DG A   2     -50.513  13.494   8.490  9.00  0.00           O  
ATOM     53  OP2  DG A   2     -50.593  14.841   6.380  3.00  0.00           O1-
ATOM     54  H1   DG A   2     -47.734   6.997  -0.100  1.00  0.00           H  
ATOM     55  H8   DG A   2     -50.250  12.417   2.180  3.00  0.00           H  
ATOM     56  H1'  DG A   2     -46.583  12.135   3.100  5.00  0.00           H  
ATOM     57  H2'  DG A   2     -49.172  13.340   3.940  6.00  0.00           H  
ATOM     58  H21  DG A   2     -45.858   6.801   0.710  1.00  0.00           H  
ATOM     59  H3'  DG A   2     -47.765  14.460   5.590  1.00  0.00           H  
ATOM     60  H22  DG A   2     -45.148   7.781   1.990  5.00  0.00           H  
ATOM     61  H4'  DG A   2     -46.211  12.165   6.080  7.00  0.00           H  
ATOM     62  H5'  DG A   2     -48.015  11.324   7.370  2.00  0.00           H  
ATOM     63 H2''  DG A   2     -47.955  14.059   2.850  5.00  0.00           H  
ATOM     64 H5''  DG A   2     -48.028  13.062   7.640  2.00  0.00           H  
ATOM     65  P    DG A   3     -44.979  15.046   5.330  3.00  0.00           P  
ATOM     66  C5'  DG A   3     -43.030  13.202   5.380  1.00  0.00           C  
ATOM     67  O5'  DG A   3     -43.570  14.370   4.800  4.00  0.00           O  
ATOM     68  C4'  DG A   3     -42.148  12.400   4.480  9.00  0.00           C  
ATOM     69  O4'  DG A   3     -42.857  11.676   3.450  6.00  0.00           O  
ATOM     70  C3'  DG A   3     -41.099  13.189   3.720  0.00  0.00           C  
ATOM     71  O3'  DG A   3     -39.982  12.388   3.710  8.00  0.00           O  
ATOM     72  C2'  DG A   3     -41.712  13.453   2.360  3.00  0.00           C  
ATOM     73  C1'  DG A   3     -42.425  12.109   2.160  9.00  0.00           C  
ATOM     74  N1   DG A   3     -45.509   9.948  -1.290  8.00  0.00           N  
ATOM     75  C2   DG A   3     -44.260   9.611  -0.820  5.00  0.00           C  
ATOM     76  N2   DG A   3     -43.745   8.560  -1.320  2.00  0.00           N  
ATOM     77  N3   DG A   3     -43.597  10.263   0.110  4.00  0.00           N  
ATOM     78  C4   DG A   3     -44.235  11.406   0.520  2.00  0.00           C  
ATOM     79  C5   DG A   3     -45.498  11.871   0.110  6.00  0.00           C  
ATOM     80  C6   DG A   3     -46.215  11.101  -0.880  9.00  0.00           C  
ATOM     81  O6   DG A   3     -47.229  11.386  -1.560  1.00  0.00           O  
ATOM     82  N7   DG A   3     -45.809  13.043   0.790  4.00  0.00           N  
ATOM     83  C8   DG A   3     -44.794  13.190   1.540  2.00  0.00           C  
ATOM     84  N9   DG A   3     -43.752  12.320   1.360  1.00  0.00           N  
ATOM     85  OP1  DG A   3     -44.966  14.649   6.740  2.00  0.00           O  
ATOM     86  OP2  DG A   3     -44.946  16.504   5.020  7.00  0.00           O1-
ATOM     87  H1   DG A   3     -45.856   9.377  -2.000  6.00  0.00           H  
ATOM     88  H8   DG A   3     -44.685  14.000   2.240  9.00  0.00           H  
ATOM     89  H1'  DG A   3     -41.857  11.350   1.580  4.00  0.00           H  
ATOM     90  H2'  DG A   3     -42.512  14.151   2.360  9.00  0.00           H  
ATOM     91  H21  DG A   3     -44.146   8.086  -2.140  2.00  0.00           H  
ATOM     92  H3'  DG A   3     -40.940  14.191   4.210  3.00  0.00           H  
ATOM     93  H22  DG A   3     -42.861   8.468  -0.870  0.00  0.00           H  
ATOM     94  H4'  DG A   3     -41.650  11.633   5.090  1.00  0.00           H  
ATOM     95  H5'  DG A   3     -43.858  12.543   5.510  4.00  0.00           H  
ATOM     96 H2''  DG A   3     -40.974  13.751   1.610  2.00  0.00           H  
ATOM     97 H5''  DG A   3     -42.563  13.362   6.320  8.00  0.00           H  
ATOM     98  P    DT A   4     -38.628  12.884   3.010  8.00  0.00           P  
ATOM     99  C5'  DT A   4     -38.358  10.904   1.330  9.00  0.00           C  
ATOM    100  O5'  DT A   4     -38.743  12.263   1.570  9.00  0.00           O  
ATOM    101  C4'  DT A   4     -38.867  10.367  -0.050  2.00  0.00           C  
ATOM    102  O4'  DT A   4     -40.207  10.793  -0.270  3.00  0.00           O  
ATOM    103  C3'  DT A   4     -37.968  10.882  -1.170  5.00  0.00           C  
ATOM    104  O3'  DT A   4     -37.530   9.707  -1.800  6.00  0.00           O  
ATOM    105  C2'  DT A   4     -38.945  11.732  -2.000  3.00  0.00           C  
ATOM    106  C1'  DT A   4     -40.330  11.183  -1.620  4.00  0.00           C  
ATOM    107  N1   DT A   4     -41.549  12.098  -1.820  3.00  0.00           N  
ATOM    108  C2   DT A   4     -42.597  11.651  -2.640  8.00  0.00           C  
ATOM    109  O2   DT A   4     -42.581  10.580  -3.290  6.00  0.00           O  
ATOM    110  N3   DT A   4     -43.675  12.495  -2.830  7.00  0.00           N  
ATOM    111  C4   DT A   4     -43.871  13.686  -2.220  3.00  0.00           C  
ATOM    112  O4   DT A   4     -44.874  14.395  -2.480  0.00  0.00           O  
ATOM    113  C5   DT A   4     -42.694  14.187  -1.490  8.00  0.00           C  
ATOM    114  C6   DT A   4     -41.586  13.406  -1.330  2.00  0.00           C  
ATOM    115  C7   DT A   4     -42.619  15.567  -0.770  8.00  0.00           C  
ATOM    116  OP1  DT A   4     -37.532  12.150   3.640  6.00  0.00           O  
ATOM    117  OP2  DT A   4     -38.626  14.364   2.990  0.00  0.00           O1-
ATOM    118  H3   DT A   4     -44.417  12.324  -3.470  4.00  0.00           H  
ATOM    119  H6   DT A   4     -40.813  13.758  -0.690  1.00  0.00           H  
ATOM    120  H1'  DT A   4     -40.338  10.298  -2.170  1.00  0.00           H  
ATOM    121  H2'  DT A   4     -38.980  12.825  -1.640  8.00  0.00           H  
ATOM    122  H3'  DT A   4     -37.091  11.435  -0.730  1.00  0.00           H  
ATOM    123  H4'  DT A   4     -38.817   9.229   0.020  1.00  0.00           H  
ATOM    124  H5'  DT A   4     -38.750  10.297   2.100  1.00  0.00           H  
ATOM    125  H71  DT A   4     -42.443  16.219  -1.600  3.00  0.00           H  
ATOM    126  H72  DT A   4     -43.566  15.578  -0.190  5.00  0.00           H  
ATOM    127  H73  DT A   4     -41.787  15.616  -0.060  4.00  0.00           H  
ATOM    128 H2''  DT A   4     -38.739  11.663  -3.030  3.00  0.00           H  
ATOM    129 H5''  DT A   4     -37.311  10.981   1.380  2.00  0.00           H  
ATOM    130  P    DT A   5     -36.557   9.743  -3.080  0.00  0.00           P  
ATOM    131  C5'  DT A   5     -38.491   8.711  -4.460  2.00  0.00           C  
ATOM    132  O5'  DT A   5     -37.524   9.770  -4.330  5.00  0.00           O  
ATOM    133  C4'  DT A   5     -39.439   8.819  -5.680  2.00  0.00           C  
ATOM    134  O4'  DT A   5     -40.265   9.901  -5.210  2.00  0.00           O  
ATOM    135  C3'  DT A   5     -38.768   9.256  -6.920  4.00  0.00           C  
ATOM    136  O3'  DT A   5     -38.960   8.352  -7.930  4.00  0.00           O  
ATOM    137  C2'  DT A   5     -39.428  10.614  -7.150  8.00  0.00           C  
ATOM    138  C1'  DT A   5     -40.736  10.565  -6.440  8.00  0.00           C  
ATOM    139  N1   DT A   5     -41.344  11.916  -6.200  9.00  0.00           N  
ATOM    140  C2   DT A   5     -42.692  12.102  -6.540  9.00  0.00           C  
ATOM    141  O2   DT A   5     -43.369  11.341  -7.240  6.00  0.00           O  
ATOM    142  N3   DT A   5     -43.253  13.332  -6.270  1.00  0.00           N  
ATOM    143  C4   DT A   5     -42.663  14.328  -5.510  4.00  0.00           C  
ATOM    144  O4   DT A   5     -43.432  15.223  -5.170  9.00  0.00           O  
ATOM    145  C5   DT A   5     -41.230  14.086  -5.230  0.00  0.00           C  
ATOM    146  C6   DT A   5     -40.602  12.924  -5.620  9.00  0.00           C  
ATOM    147  C7   DT A   5     -40.464  15.209  -4.520  2.00  0.00           C  
ATOM    148  OP1  DT A   5     -35.808   8.458  -3.010  3.00  0.00           O  
ATOM    149  OP2  DT A   5     -35.833  11.031  -2.990  0.00  0.00           O1-
ATOM    150  H3   DT A   5     -44.282  13.400  -6.450  6.00  0.00           H  
ATOM    151  H6   DT A   5     -39.572  12.717  -5.240  0.00  0.00           H  
ATOM    152  H1'  DT A   5     -41.324  10.018  -7.150  8.00  0.00           H  
ATOM    153  H2'  DT A   5     -38.808  11.353  -6.660  8.00  0.00           H  
ATOM    154  H3'  DT A   5     -37.748   9.441  -6.690  7.00  0.00           H  
ATOM    155  H4'  DT A   5     -39.965   7.914  -5.870  0.00  0.00           H  
ATOM    156  H5'  DT A   5     -39.145   8.641  -3.570  4.00  0.00           H  
ATOM    157  H71  DT A   5     -41.061  15.469  -3.660  5.00  0.00           H  
ATOM    158  H72  DT A   5     -39.551  14.841  -4.000  0.00  0.00           H  
ATOM    159  H73  DT A   5     -40.399  16.094  -5.200  4.00  0.00           H  
ATOM    160 H2''  DT A   5     -39.496  10.773  -8.210  2.00  0.00           H  
ATOM    161 H5''  DT A   5     -37.892   7.841  -4.600  0.00  0.00           H  
ATOM    162  P    DA A   6     -37.966   8.144  -9.210  8.00  0.00           P  
ATOM    163  C5'  DA A   6     -39.966   9.095 -10.560  2.00  0.00           C  
ATOM    164  O5'  DA A   6     -38.641   9.288 -10.100  1.00  0.00           O  
ATOM    165  C4'  DA A   6     -40.465  10.240 -11.400  9.00  0.00           C  
ATOM    166  O4'  DA A   6     -40.969  11.179 -10.500  6.00  0.00           O  
ATOM    167  C3'  DA A   6     -39.438  10.955 -12.340  0.00  0.00           C  
ATOM    168  O3'  DA A   6     -40.108  11.201 -13.530  7.00  0.00           O  
ATOM    169  C2'  DA A   6     -39.278  12.228 -11.560  9.00  0.00           C  
ATOM    170  C1'  DA A   6     -40.754  12.396 -11.080  6.00  0.00           C  
ATOM    171  N1   DA A   6     -44.387  15.696  -9.730  1.00  0.00           N  
ATOM    172  C2   DA A   6     -44.331  14.826 -10.740  5.00  0.00           C  
ATOM    173  N3   DA A   6     -43.341  13.948 -10.970  8.00  0.00           N  
ATOM    174  C4   DA A   6     -42.281  14.117 -10.210  7.00  0.00           C  
ATOM    175  C5   DA A   6     -42.199  15.019  -9.150  7.00  0.00           C  
ATOM    176  C6   DA A   6     -43.311  15.875  -8.970  1.00  0.00           C  
ATOM    177  N6   DA A   6     -43.283  16.819  -8.060  6.00  0.00           N  
ATOM    178  N7   DA A   6     -40.982  14.955  -8.480  3.00  0.00           N  
ATOM    179  C8   DA A   6     -40.300  14.046  -9.190  2.00  0.00           C  
ATOM    180  N9   DA A   6     -41.045  13.433 -10.190  5.00  0.00           N  
ATOM    181  OP1  DA A   6     -38.203   6.790  -9.770  0.00  0.00           O  
ATOM    182  OP2  DA A   6     -36.655   8.463  -8.740  2.00  0.00           O1-
ATOM    183  H2   DA A   6     -45.274  14.751 -11.310  6.00  0.00           H  
ATOM    184  H8   DA A   6     -39.322  13.817  -8.860  1.00  0.00           H  
ATOM    185  H1'  DA A   6     -41.375  12.457 -12.020  9.00  0.00           H  
ATOM    186  H2'  DA A   6     -38.624  12.016 -10.710  5.00  0.00           H  
ATOM    187  H3'  DA A   6     -38.552  10.412 -12.490  9.00  0.00           H  
ATOM    188  H4'  DA A   6     -41.301   9.920 -11.990  3.00  0.00           H  
ATOM    189  H5'  DA A   6     -40.666   8.794  -9.780  7.00  0.00           H  
ATOM    190  H61  DA A   6     -44.206  17.242  -8.080  8.00  0.00           H  
ATOM    191  H62  DA A   6     -42.760  16.656  -7.270  9.00  0.00           H  
ATOM    192 H2''  DA A   6     -38.939  13.023 -12.180  4.00  0.00           H  
ATOM    193 H5''  DA A   6     -39.866   8.306 -11.320  2.00  0.00           H  
ATOM    194  P    DG A   7     -39.720  10.318 -14.810  6.00  0.00           P  
ATOM    195  C5'  DG A   7     -42.016  10.710 -16.170  2.00  0.00           C  
ATOM    196  O5'  DG A   7     -40.687  11.023 -15.840  4.00  0.00           O  
ATOM    197  C4'  DG A   7     -42.915  11.966 -16.070  2.00  0.00           C  
ATOM    198  O4'  DG A   7     -42.964  12.667 -14.830  9.00  0.00           O  
ATOM    199  C3'  DG A   7     -42.463  12.939 -17.210  3.00  0.00           C  
ATOM    200  O3'  DG A   7     -43.533  13.170 -18.090  2.00  0.00           O  
ATOM    201  C2'  DG A   7     -42.033  14.140 -16.360  8.00  0.00           C  
ATOM    202  C1'  DG A   7     -42.828  14.019 -15.150  7.00  0.00           C  
ATOM    203  N1   DG A   7     -43.946  17.913 -12.230  1.00  0.00           N  
ATOM    204  C2   DG A   7     -44.673  17.218 -13.120  7.00  0.00           C  
ATOM    205  N2   DG A   7     -45.835  17.682 -13.330  5.00  0.00           N  
ATOM    206  N3   DG A   7     -44.382  16.160 -13.760  1.00  0.00           N  
ATOM    207  C4   DG A   7     -43.090  15.818 -13.410  2.00  0.00           C  
ATOM    208  C5   DG A   7     -42.155  16.465 -12.570  5.00  0.00           C  
ATOM    209  C6   DG A   7     -42.602  17.648 -11.870  3.00  0.00           C  
ATOM    210  O6   DG A   7     -42.058  18.426 -11.130  2.00  0.00           O  
ATOM    211  N7   DG A   7     -40.928  15.790 -12.520  0.00  0.00           N  
ATOM    212  C8   DG A   7     -41.066  14.799 -13.410  4.00  0.00           C  
ATOM    213  N9   DG A   7     -42.309  14.814 -14.000  7.00  0.00           N  
ATOM    214  OP1  DG A   7     -40.222   8.956 -14.610  0.00  0.00           O  
ATOM    215  OP2  DG A   7     -38.265  10.564 -15.150  3.00  0.00           O1-
ATOM    216  H1   DG A   7     -44.338  18.722 -11.820  1.00  0.00           H  
ATOM    217  H8   DG A   7     -40.330  14.138 -13.630  1.00  0.00           H  
ATOM    218  H1'  DG A   7     -43.900  14.366 -15.320  9.00  0.00           H  
ATOM    219  H2'  DG A   7     -40.968  13.915 -16.090  7.00  0.00           H  
ATOM    220  H21  DG A   7     -46.186  18.488 -12.740  5.00  0.00           H  
ATOM    221  H3'  DG A   7     -41.654  12.510 -17.800  5.00  0.00           H  
ATOM    222  H22  DG A   7     -46.234  17.428 -14.260  5.00  0.00           H  
ATOM    223  H4'  DG A   7     -43.893  11.574 -16.230  0.00  0.00           H  
ATOM    224  H5'  DG A   7     -42.491  10.076 -15.510  7.00  0.00           H  
ATOM    225 H2''  DG A   7     -42.067  15.087 -16.830  6.00  0.00           H  
ATOM    226 H5''  DG A   7     -42.103  10.323 -17.210  2.00  0.00           H  
ATOM    227  P    DG A   8     -43.539  14.277 -19.230  5.00  0.00           P  
ATOM    228  C5'  DG A   8     -45.608  15.438 -18.280  1.00  0.00           C  
ATOM    229  O5'  DG A   8     -44.231  15.474 -18.540  9.00  0.00           O  
ATOM    230  C4'  DG A   8     -46.126  16.803 -17.830  9.00  0.00           C  
ATOM    231  O4'  DG A   8     -45.665  17.195 -16.530  5.00  0.00           O  
ATOM    232  C3'  DG A   8     -45.740  17.900 -18.780  2.00  0.00           C  
ATOM    233  O3'  DG A   8     -46.851  18.739 -19.190  1.00  0.00           O  
ATOM    234  C2'  DG A   8     -44.576  18.606 -18.060  6.00  0.00           C  
ATOM    235  C1'  DG A   8     -45.000  18.433 -16.610  2.00  0.00           C  
ATOM    236  N1   DG A   8     -43.124  21.772 -13.330  9.00  0.00           N  
ATOM    237  C2   DG A   8     -44.404  21.629 -13.830  4.00  0.00           C  
ATOM    238  N2   DG A   8     -45.126  22.655 -13.600  6.00  0.00           N  
ATOM    239  N3   DG A   8     -44.794  20.712 -14.730  3.00  0.00           N  
ATOM    240  C4   DG A   8     -43.729  19.816 -14.940  5.00  0.00           C  
ATOM    241  C5   DG A   8     -42.458  19.835 -14.450  7.00  0.00           C  
ATOM    242  C6   DG A   8     -42.126  20.874 -13.520  9.00  0.00           C  
ATOM    243  O6   DG A   8     -41.088  21.099 -12.970  9.00  0.00           O  
ATOM    244  N7   DG A   8     -41.708  18.763 -15.040  8.00  0.00           N  
ATOM    245  C8   DG A   8     -42.588  18.151 -15.780  3.00  0.00           C  
ATOM    246  N9   DG A   8     -43.847  18.759 -15.810  0.00  0.00           N  
ATOM    247  OP1  DG A   8     -44.428  13.705 -20.230  3.00  0.00           O  
ATOM    248  OP2  DG A   8     -42.117  14.539 -19.620  6.00  0.00           O1-
ATOM    249  H1   DG A   8     -42.896  22.591 -12.760  1.00  0.00           H  
ATOM    250  H8   DG A   8     -42.320  17.250 -16.310  5.00  0.00           H  
ATOM    251  H1'  DG A   8     -45.742  19.162 -16.420  5.00  0.00           H  
ATOM    252  H2'  DG A   8     -43.650  18.161 -18.360  7.00  0.00           H  
ATOM    253  H21  DG A   8     -44.884  23.284 -12.810  7.00  0.00           H  
ATOM    254  H3'  DG A   8     -45.331  17.601 -19.670  8.00  0.00           H  
ATOM    255  H22  DG A   8     -46.023  22.753 -14.040  1.00  0.00           H  
ATOM    256  H4'  DG A   8     -47.262  16.688 -17.690  2.00  0.00           H  
ATOM    257  H5'  DG A   8     -45.875  14.655 -17.530  8.00  0.00           H  
ATOM    258 H2''  DG A   8     -44.515  19.646 -18.290  1.00  0.00           H  
ATOM    259 H5''  DG A   8     -46.114  15.180 -19.190  2.00  0.00           H  
ATOM    260  P    DG A   9     -46.650  20.036 -20.160  7.00  0.00           P  
ATOM    261  C5'  DG A   9     -47.502  21.786 -18.290  7.00  0.00           C  
ATOM    262  O5'  DG A   9     -46.554  21.346 -19.230  2.00  0.00           O  
ATOM    263  C4'  DG A   9     -47.230  23.144 -17.640  3.00  0.00           C  
ATOM    264  O4'  DG A   9     -46.184  23.007 -16.680  0.00  0.00           O  
ATOM    265  C3'  DG A   9     -46.792  24.300 -18.550  8.00  0.00           C  
ATOM    266  O3'  DG A   9     -47.469  25.486 -18.130  5.00  0.00           O  
ATOM    267  C2'  DG A   9     -45.293  24.397 -18.380  8.00  0.00           C  
ATOM    268  C1'  DG A   9     -45.211  24.030 -16.890  7.00  0.00           C  
ATOM    269  N1   DG A   9     -41.147  25.043 -14.160  6.00  0.00           N  
ATOM    270  C2   DG A   9     -42.317  25.722 -14.290  6.00  0.00           C  
ATOM    271  N2   DG A   9     -42.405  26.859 -13.720  5.00  0.00           N  
ATOM    272  N3   DG A   9     -43.277  25.415 -15.130  0.00  0.00           N  
ATOM    273  C4   DG A   9     -42.958  24.286 -15.860  5.00  0.00           C  
ATOM    274  C5   DG A   9     -41.814  23.488 -15.790  1.00  0.00           C  
ATOM    275  C6   DG A   9     -40.829  23.867 -14.850  7.00  0.00           C  
ATOM    276  O6   DG A   9     -39.820  23.309 -14.480  4.00  0.00           O  
ATOM    277  N7   DG A   9     -41.951  22.337 -16.560  2.00  0.00           N  
ATOM    278  C8   DG A   9     -43.224  22.375 -16.910  1.00  0.00           C  
ATOM    279  N9   DG A   9     -43.830  23.589 -16.610  7.00  0.00           N  
ATOM    280  OP1  DG A   9     -47.908  20.153 -20.840  7.00  0.00           O  
ATOM    281  OP2  DG A   9     -45.370  19.953 -20.860  6.00  0.00           O1-
ATOM    282  H1   DG A   9     -40.552  25.499 -13.500  8.00  0.00           H  
ATOM    283  H8   DG A   9     -43.705  21.571 -17.440  7.00  0.00           H  
ATOM    284  H1'  DG A   9     -45.386  24.924 -16.220  3.00  0.00           H  
ATOM    285  H2'  DG A   9     -44.823  23.681 -18.980  5.00  0.00           H  
ATOM    286  H21  DG A   9     -41.763  27.162 -12.960  5.00  0.00           H  
ATOM    287  H3'  DG A   9     -46.935  24.080 -19.650  2.00  0.00           H  
ATOM    288  H22  DG A   9     -43.153  27.458 -13.940  3.00  0.00           H  
ATOM    289  H4'  DG A   9     -48.158  23.294 -17.020  4.00  0.00           H  
ATOM    290  H5'  DG A   9     -47.524  21.073 -17.440  2.00  0.00           H  
ATOM    291 H2''  DG A   9     -44.865  25.433 -18.500  7.00  0.00           H  
ATOM    292 H5''  DG A   9     -48.447  21.885 -18.790  7.00  0.00           H  
ATOM    293  P    DT A  10     -47.558  26.806 -19.140  7.00  0.00           P  
ATOM    294  C5'  DT A  10     -46.753  28.192 -17.080  0.00  0.00           C  
ATOM    295  O5'  DT A  10     -46.510  27.787 -18.430  1.00  0.00           O  
ATOM    296  C4'  DT A  10     -45.594  29.074 -16.530  6.00  0.00           C  
ATOM    297  O4'  DT A  10     -44.454  28.200 -16.280  6.00  0.00           O  
ATOM    298  C3'  DT A  10     -45.161  30.171 -17.520  0.00  0.00           C  
ATOM    299  O3'  DT A  10     -45.282  31.379 -16.750  0.00  0.00           O  
ATOM    300  C2'  DT A  10     -43.767  29.820 -17.810  9.00  0.00           C  
ATOM    301  C1'  DT A  10     -43.299  28.859 -16.670  6.00  0.00           C  
ATOM    302  N1   DT A  10     -42.226  27.934 -17.130  4.00  0.00           N  
ATOM    303  C2   DT A  10     -40.986  28.110 -16.630  4.00  0.00           C  
ATOM    304  O2   DT A  10     -40.604  29.113 -15.940  4.00  0.00           O  
ATOM    305  N3   DT A  10     -39.999  27.152 -16.850  5.00  0.00           N  
ATOM    306  C4   DT A  10     -40.099  26.063 -17.720  4.00  0.00           C  
ATOM    307  O4   DT A  10     -39.168  25.349 -18.000  0.00  0.00           O  
ATOM    308  C5   DT A  10     -41.477  25.927 -18.320  2.00  0.00           C  
ATOM    309  C6   DT A  10     -42.438  26.915 -17.990  5.00  0.00           C  
ATOM    310  C7   DT A  10     -41.724  25.085 -19.510  8.00  0.00           C  
ATOM    311  OP1  DT A  10     -48.881  27.435 -18.960  5.00  0.00           O  
ATOM    312  OP2  DT A  10     -47.098  26.370 -20.470  1.00  0.00           O1-
ATOM    313  H3   DT A  10     -39.222  27.113 -16.220  0.00  0.00           H  
ATOM    314  H6   DT A  10     -43.354  26.949 -18.570  3.00  0.00           H  
ATOM    315  H1'  DT A  10     -42.954  29.488 -15.880  6.00  0.00           H  
ATOM    316  H2'  DT A  10     -43.860  29.355 -18.850  2.00  0.00           H  
ATOM    317  H3'  DT A  10     -45.735  30.172 -18.490  6.00  0.00           H  
ATOM    318  H4'  DT A  10     -45.949  29.493 -15.580  9.00  0.00           H  
ATOM    319  H5'  DT A  10     -46.875  27.328 -16.390  6.00  0.00           H  
ATOM    320  H71  DT A  10     -40.957  25.398 -20.260  9.00  0.00           H  
ATOM    321  H72  DT A  10     -41.646  24.115 -19.250  8.00  0.00           H  
ATOM    322  H73  DT A  10     -42.684  25.284 -19.990  6.00  0.00           H  
ATOM    323 H2''  DT A  10     -43.070  30.654 -17.880  6.00  0.00           H  
ATOM    324 H5''  DT A  10     -47.534  28.948 -17.160  1.00  0.00           H  
ATOM    325  P    DT A  11     -44.904  32.857 -17.340  3.00  0.00           P  
ATOM    326  C5'  DT A  11     -42.626  33.170 -15.940  9.00  0.00           C  
ATOM    327  O5'  DT A  11     -43.308  33.110 -17.200  4.00  0.00           O  
ATOM    328  C4'  DT A  11     -41.085  33.210 -16.080  9.00  0.00           C  
ATOM    329  O4'  DT A  11     -40.658  31.995 -16.670  8.00  0.00           O  
ATOM    330  C3'  DT A  11     -40.539  34.329 -17.000  0.00  0.00           C  
ATOM    331  O3'  DT A  11     -39.353  34.896 -16.480  9.00  0.00           O  
ATOM    332  C2'  DT A  11     -40.095  33.580 -18.270  1.00  0.00           C  
ATOM    333  C1'  DT A  11     -39.611  32.285 -17.620  6.00  0.00           C  
ATOM    334  N1   DT A  11     -39.339  31.111 -18.540  1.00  0.00           N  
ATOM    335  C2   DT A  11     -38.151  30.376 -18.370  3.00  0.00           C  
ATOM    336  O2   DT A  11     -37.164  30.840 -17.790  7.00  0.00           O  
ATOM    337  N3   DT A  11     -38.182  29.122 -18.860  3.00  0.00           N  
ATOM    338  C4   DT A  11     -39.142  28.534 -19.670  8.00  0.00           C  
ATOM    339  O4   DT A  11     -38.953  27.411 -20.150  0.00  0.00           O  
ATOM    340  C5   DT A  11     -40.188  29.470 -20.020  2.00  0.00           C  
ATOM    341  C6   DT A  11     -40.284  30.686 -19.450  6.00  0.00           C  
ATOM    342  C7   DT A  11     -41.250  29.086 -21.030  1.00  0.00           C  
ATOM    343  OP1  DT A  11     -45.622  33.834 -16.470  4.00  0.00           O  
ATOM    344  OP2  DT A  11     -45.315  32.780 -18.770  4.00  0.00           O1-
ATOM    345  H3   DT A  11     -37.516  28.445 -18.480  4.00  0.00           H  
ATOM    346  H6   DT A  11     -41.175  31.276 -19.620  9.00  0.00           H  
ATOM    347  H1'  DT A  11     -38.712  32.512 -17.060  2.00  0.00           H  
ATOM    348  H2'  DT A  11     -40.917  33.356 -19.040  2.00  0.00           H  
ATOM    349  H3'  DT A  11     -41.369  35.014 -17.100  9.00  0.00           H  
ATOM    350  H4'  DT A  11     -40.645  33.259 -15.100  2.00  0.00           H  
ATOM    351  H5'  DT A  11     -42.955  32.348 -15.360  9.00  0.00           H  
ATOM    352  H71  DT A  11     -42.147  29.661 -20.920  3.00  0.00           H  
ATOM    353  H72  DT A  11     -40.909  29.320 -22.020  8.00  0.00           H  
ATOM    354  H73  DT A  11     -41.354  28.026 -21.120  7.00  0.00           H  
ATOM    355 H2''  DT A  11     -39.303  34.138 -18.710  7.00  0.00           H  
ATOM    356 H5''  DT A  11     -43.020  34.000 -15.410  8.00  0.00           H  
ATOM    357  P    DA A  12     -39.301  35.889 -15.200  1.00  0.00           P  
ATOM    358  C5'  DA A  12     -36.799  35.230 -15.270  4.00  0.00           C  
ATOM    359  O5'  DA A  12     -37.790  36.279 -15.150  4.00  0.00           O  
ATOM    360  C4'  DA A  12     -35.715  35.642 -14.240  1.00  0.00           C  
ATOM    361  O4'  DA A  12     -34.589  34.705 -14.180  2.00  0.00           O  
ATOM    362  C3'  DA A  12     -35.064  37.009 -14.460  1.00  0.00           C  
ATOM    363  O3'  DA A  12     -35.005  37.736 -13.250  8.00  0.00           O  
ATOM    364  C2'  DA A  12     -33.699  36.643 -14.990  5.00  0.00           C  
ATOM    365  C1'  DA A  12     -33.411  35.454 -14.070  0.00  0.00           C  
ATOM    366  N1   DA A  12     -28.974  33.968 -11.860  9.00  0.00           N  
ATOM    367  C2   DA A  12     -30.095  34.487 -11.340  6.00  0.00           C  
ATOM    368  N3   DA A  12     -31.141  34.811 -11.970  8.00  0.00           N  
ATOM    369  C4   DA A  12     -31.059  34.672 -13.290  4.00  0.00           C  
ATOM    370  C5   DA A  12     -29.992  34.183 -14.010  6.00  0.00           C  
ATOM    371  C6   DA A  12     -28.881  33.810 -13.180  2.00  0.00           C  
ATOM    372  N6   DA A  12     -27.700  33.348 -13.610  7.00  0.00           N  
ATOM    373  N7   DA A  12     -30.316  34.083 -15.430  3.00  0.00           N  
ATOM    374  C8   DA A  12     -31.550  34.438 -15.440  3.00  0.00           C  
ATOM    375  N9   DA A  12     -32.077  34.824 -14.230  9.00  0.00           N  
ATOM    376  OP1  DA A  12     -39.546  35.110 -13.970  7.00  0.00           O  
ATOM    377  OP2  DA A  12     -40.007  37.098 -15.470  8.00  0.00           O1-
ATOM    378  H2   DA A  12     -30.098  34.810 -10.330  0.00  0.00           H  
ATOM    379  H8   DA A  12     -32.100  34.522 -16.340  9.00  0.00           H  
ATOM    380  H1'  DA A  12     -33.390  35.836 -13.070  5.00  0.00           H  
ATOM    381  H2'  DA A  12     -33.743  36.342 -15.970  4.00  0.00           H  
ATOM    382  H3'  DA A  12     -35.590  37.629 -15.160  3.00  0.00           H  
ATOM    383  H4'  DA A  12     -36.249  35.641 -13.300  7.00  0.00           H  
ATOM    384  H5'  DA A  12     -36.390  35.182 -16.230  1.00  0.00           H  
ATOM    385  H61  DA A  12     -26.964  33.118 -12.940  4.00  0.00           H  
ATOM    386  H62  DA A  12     -27.563  33.320 -14.630  2.00  0.00           H  
ATOM    387 H2''  DA A  12     -33.063  37.512 -14.810  9.00  0.00           H  
ATOM    388 H5''  DA A  12     -37.225  34.269 -14.960  5.00  0.00           H  
ATOM    389  P    DG A  13     -34.870  39.359 -13.280  0.00  0.00           P  
ATOM    390  C5'  DG A  13     -32.488  39.019 -12.060  1.00  0.00           C  
ATOM    391  O5'  DG A  13     -33.252  39.457 -13.240  8.00  0.00           O  
ATOM    392  C4'  DG A  13     -30.933  39.267 -12.250  1.00  0.00           C  
ATOM    393  O4'  DG A  13     -30.391  38.200 -13.010  7.00  0.00           O  
ATOM    394  C3'  DG A  13     -30.578  40.611 -12.840  7.00  0.00           C  
ATOM    395  O3'  DG A  13     -29.762  41.416 -11.950  2.00  0.00           O  
ATOM    396  C2'  DG A  13     -30.094  40.284 -14.220  0.00  0.00           C  
ATOM    397  C1'  DG A  13     -29.588  38.904 -13.930  5.00  0.00           C  
ATOM    398  N1   DG A  13     -26.744  35.461 -16.410  7.00  0.00           N  
ATOM    399  C2   DG A  13     -26.452  36.143 -15.250  7.00  0.00           C  
ATOM    400  N2   DG A  13     -25.337  35.744 -14.670  3.00  0.00           N  
ATOM    401  N3   DG A  13     -27.284  37.020 -14.680  8.00  0.00           N  
ATOM    402  C4   DG A  13     -28.408  37.323 -15.450  1.00  0.00           C  
ATOM    403  C5   DG A  13     -28.698  36.765 -16.700  5.00  0.00           C  
ATOM    404  C6   DG A  13     -27.832  35.792 -17.240  1.00  0.00           C  
ATOM    405  O6   DG A  13     -27.729  35.473 -18.420  7.00  0.00           O  
ATOM    406  N7   DG A  13     -29.871  37.324 -17.200  7.00  0.00           N  
ATOM    407  C8   DG A  13     -30.288  38.171 -16.280  9.00  0.00           C  
ATOM    408  N9   DG A  13     -29.423  38.143 -15.200  8.00  0.00           N  
ATOM    409  OP1  DG A  13     -35.326  39.883 -11.960  0.00  0.00           O  
ATOM    410  OP2  DG A  13     -35.425  39.916 -14.520  6.00  0.00           O1-
ATOM    411  H1   DG A  13     -26.039  34.809 -16.750  2.00  0.00           H  
ATOM    412  H8   DG A  13     -31.135  38.815 -16.390  6.00  0.00           H  
ATOM    413  H1'  DG A  13     -28.541  39.041 -13.550  5.00  0.00           H  
ATOM    414  H2'  DG A  13     -30.992  40.239 -14.850  3.00  0.00           H  
ATOM    415  H21  DG A  13     -24.747  34.972 -15.060  3.00  0.00           H  
ATOM    416  H3'  DG A  13     -31.511  41.181 -12.930  2.00  0.00           H  
ATOM    417  H22  DG A  13     -25.258  36.166 -13.750  6.00  0.00           H  
ATOM    418  H4'  DG A  13     -30.489  39.348 -11.290  6.00  0.00           H  
ATOM    419  H5'  DG A  13     -32.564  37.933 -11.930  7.00  0.00           H  
ATOM    420 H2''  DG A  13     -29.335  40.986 -14.640  9.00  0.00           H  
ATOM    421 H5''  DG A  13     -32.845  39.532 -11.180  8.00  0.00           H  
ATOM    422  P    DG A  14     -29.006  42.791 -12.300  2.00  0.00           P  
ATOM    423  C5'  DG A  14     -26.471  43.173 -13.010  7.00  0.00           C  
ATOM    424  O5'  DG A  14     -27.644  42.295 -12.970  7.00  0.00           O  
ATOM    425  C4'  DG A  14     -25.305  42.420 -13.720  6.00  0.00           C  
ATOM    426  O4'  DG A  14     -25.654  41.921 -14.940  1.00  0.00           O  
ATOM    427  C3'  DG A  14     -24.825  41.275 -12.700  3.00  0.00           C  
ATOM    428  O3'  DG A  14     -23.608  41.425 -11.920  1.00  0.00           O  
ATOM    429  C2'  DG A  14     -24.746  40.129 -13.750  6.00  0.00           C  
ATOM    430  C1'  DG A  14     -25.763  40.492 -14.810  5.00  0.00           C  
ATOM    431  N1   DG A  14     -27.841  39.600 -19.450  2.00  0.00           N  
ATOM    432  C2   DG A  14     -28.294  40.285 -18.310  7.00  0.00           C  
ATOM    433  N2   DG A  14     -29.510  40.716 -18.270  3.00  0.00           N  
ATOM    434  N3   DG A  14     -27.568  40.498 -17.210  0.00  0.00           N  
ATOM    435  C4   DG A  14     -26.332  39.856 -17.200  0.00  0.00           C  
ATOM    436  C5   DG A  14     -25.897  39.083 -18.200  3.00  0.00           C  
ATOM    437  C6   DG A  14     -26.673  38.859 -19.420  0.00  0.00           C  
ATOM    438  O6   DG A  14     -26.497  38.229 -20.410  0.00  0.00           O  
ATOM    439  N7   DG A  14     -24.575  38.672 -17.860  2.00  0.00           N  
ATOM    440  C8   DG A  14     -24.397  39.266 -16.650  4.00  0.00           C  
ATOM    441  N9   DG A  14     -25.503  39.817 -16.120  2.00  0.00           N  
ATOM    442  OP1  DG A  14     -28.758  43.429 -11.030  3.00  0.00           O  
ATOM    443  OP2  DG A  14     -29.776  43.421 -13.400  6.00  0.00           O1-
ATOM    444  H1   DG A  14     -28.509  39.482 -20.160  1.00  0.00           H  
ATOM    445  H8   DG A  14     -23.471  39.061 -16.180  6.00  0.00           H  
ATOM    446  H1'  DG A  14     -26.801  40.201 -14.510  2.00  0.00           H  
ATOM    447  H2'  DG A  14     -23.738  40.019 -14.160  0.00  0.00           H  
ATOM    448  H21  DG A  14     -30.214  40.444 -19.030  1.00  0.00           H  
ATOM    449  H3'  DG A  14     -25.649  41.059 -12.020  2.00  0.00           H  
ATOM    450  H22  DG A  14     -29.742  41.367 -17.500  9.00  0.00           H  
ATOM    451  H4'  DG A  14     -24.395  42.927 -13.800  7.00  0.00           H  
ATOM    452  H5'  DG A  14     -26.217  43.485 -11.990  0.00  0.00           H  
ATOM    453 H2''  DG A  14     -25.059  39.131 -13.250  8.00  0.00           H  
ATOM    454 H5''  DG A  14     -26.829  44.022 -13.650  9.00  0.00           H  
ATOM    455  P    DG A  15     -23.217  42.652 -11.060  0.00  0.00           P  
ATOM    456  C5'  DG A  15     -21.674  43.496 -13.050  9.00  0.00           C  
ATOM    457  O5'  DG A  15     -22.792  43.688 -12.260  8.00  0.00           O  
ATOM    458  C4'  DG A  15     -21.678  44.038 -14.460  5.00  0.00           C  
ATOM    459  O4'  DG A  15     -22.395  43.219 -15.330  4.00  0.00           O  
ATOM    460  C3'  DG A  15     -22.210  45.477 -14.560  7.00  0.00           C  
ATOM    461  O3'  DG A  15     -21.241  46.364 -15.010  6.00  0.00           O  
ATOM    462  C2'  DG A  15     -23.259  45.369 -15.620  1.00  0.00           C  
ATOM    463  C1'  DG A  15     -22.807  44.087 -16.330  1.00  0.00           C  
ATOM    464  N1   DG A  15     -23.335  40.726 -20.100  9.00  0.00           N  
ATOM    465  C2   DG A  15     -22.349  40.936 -19.140  1.00  0.00           C  
ATOM    466  N2   DG A  15     -21.132  40.386 -19.350  7.00  0.00           N  
ATOM    467  N3   DG A  15     -22.401  41.734 -18.090  0.00  0.00           N  
ATOM    468  C4   DG A  15     -23.609  42.406 -18.060  9.00  0.00           C  
ATOM    469  C5   DG A  15     -24.630  42.317 -18.940  8.00  0.00           C  
ATOM    470  C6   DG A  15     -24.519  41.360 -20.030  0.00  0.00           C  
ATOM    471  O6   DG A  15     -25.261  40.988 -20.950  6.00  0.00           O  
ATOM    472  N7   DG A  15     -25.609  43.234 -18.610  4.00  0.00           N  
ATOM    473  C8   DG A  15     -25.153  43.899 -17.570  1.00  0.00           C  
ATOM    474  N9   DG A  15     -23.845  43.503 -17.270  8.00  0.00           N  
ATOM    475  OP1  DG A  15     -21.996  42.327 -10.280  6.00  0.00           O  
ATOM    476  OP2  DG A  15     -24.434  43.177 -10.390  9.00  0.00           O1-
ATOM    477  H1   DG A  15     -23.139  40.235 -20.990  4.00  0.00           H  
ATOM    478  H8   DG A  15     -25.674  44.715 -17.030  1.00  0.00           H  
ATOM    479  H1'  DG A  15     -21.973  44.287 -16.980  3.00  0.00           H  
ATOM    480  H2'  DG A  15     -24.242  45.272 -15.140  8.00  0.00           H  
ATOM    481  H21  DG A  15     -20.842  40.016 -20.270  5.00  0.00           H  
ATOM    482  H3'  DG A  15     -22.653  45.755 -13.590  1.00  0.00           H  
ATOM    483  H22  DG A  15     -20.475  40.687 -18.640  7.00  0.00           H  
ATOM    484  H4'  DG A  15     -20.755  44.116 -14.780  3.00  0.00           H  
ATOM    485  H5'  DG A  15     -21.438  42.434 -13.030  5.00  0.00           H  
ATOM    486 H2''  DG A  15     -23.302  46.274 -16.290  1.00  0.00           H  
ATOM    487 H5''  DG A  15     -20.842  44.039 -12.560  9.00  0.00           H  
ATOM    488  P    DT A  16     -21.074  47.886 -14.480  4.00  0.00           P  
ATOM    489  C5'  DT A  16     -18.809  48.004 -15.760  9.00  0.00           C  
ATOM    490  O5'  DT A  16     -19.541  48.087 -14.560  1.00  0.00           O  
ATOM    491  C4'  DT A  16     -17.719  46.972 -15.550  8.00  0.00           C  
ATOM    492  O4'  DT A  16     -17.071  47.182 -14.300  8.00  0.00           O  
ATOM    493  C3'  DT A  16     -18.225  45.480 -15.620  2.00  0.00           C  
ATOM    494  O3'  DT A  16     -17.299  44.757 -16.400  1.00  0.00           O  
ATOM    495  C2'  DT A  16     -18.303  45.133 -14.150  9.00  0.00           C  
ATOM    496  C1'  DT A  16     -17.151  45.986 -13.560  8.00  0.00           C  
ATOM    497  N1   DT A  16     -17.183  46.332 -12.130  4.00  0.00           N  
ATOM    498  C2   DT A  16     -16.186  45.746 -11.340  6.00  0.00           C  
ATOM    499  O2   DT A  16     -15.120  45.236 -11.680  8.00  0.00           O  
ATOM    500  N3   DT A  16     -16.412  45.757  -9.960  5.00  0.00           N  
ATOM    501  C4   DT A  16     -17.453  46.297  -9.310  7.00  0.00           C  
ATOM    502  O4   DT A  16     -17.358  46.483  -8.110  5.00  0.00           O  
ATOM    503  C5   DT A  16     -18.479  46.807 -10.230  6.00  0.00           C  
ATOM    504  C6   DT A  16     -18.340  46.818 -11.550  8.00  0.00           C  
ATOM    505  C7   DT A  16     -19.648  47.585  -9.610  7.00  0.00           C  
ATOM    506  OP1  DT A  16     -21.527  47.985 -13.050  1.00  0.00           O  
ATOM    507  OP2  DT A  16     -21.763  48.725 -15.470  2.00  0.00           O1-
ATOM    508  H3   DT A  16     -15.578  45.421  -9.480  3.00  0.00           H  
ATOM    509  H6   DT A  16     -19.075  47.304 -12.210  9.00  0.00           H  
ATOM    510  H1'  DT A  16     -16.320  45.438 -13.820  8.00  0.00           H  
ATOM    511  H2'  DT A  16     -19.214  45.589 -13.750  8.00  0.00           H  
ATOM    512  H3'  DT A  16     -19.191  45.539 -16.000  1.00  0.00           H  
ATOM    513  H4'  DT A  16     -16.959  47.056 -16.400  6.00  0.00           H  
ATOM    514  H5'  DT A  16     -18.379  49.044 -15.950  3.00  0.00           H  
ATOM    515  H71  DT A  16     -20.274  47.900 -10.430  0.00  0.00           H  
ATOM    516  H72  DT A  16     -20.168  46.974  -8.870  1.00  0.00           H  
ATOM    517  H73  DT A  16     -19.283  48.516  -9.110  0.00  0.00           H  
ATOM    518 H2''  DT A  16     -18.283  44.067 -14.060  5.00  0.00           H  
ATOM    519 H5''  DT A  16     -19.520  47.808 -16.620  5.00  0.00           H  
ATOM    520  P    DT A  17     -17.623  43.364 -17.100  5.00  0.00           P  
ATOM    521  C5'  DT A  17     -19.900  43.823 -18.520  2.00  0.00           C  
ATOM    522  O5'  DT A  17     -18.460  43.687 -18.490  5.00  0.00           O  
ATOM    523  C4'  DT A  17     -20.455  43.841 -19.970  7.00  0.00           C  
ATOM    524  O4'  DT A  17     -21.854  43.987 -19.930  8.00  0.00           O  
ATOM    525  C3'  DT A  17     -19.896  44.944 -20.920  1.00  0.00           C  
ATOM    526  O3'  DT A  17     -19.667  44.479 -22.270  9.00  0.00           O  
ATOM    527  C2'  DT A  17     -21.069  45.929 -20.920  0.00  0.00           C  
ATOM    528  C1'  DT A  17     -22.212  44.936 -20.930  2.00  0.00           C  
ATOM    529  N1   DT A  17     -23.578  45.463 -20.600  4.00  0.00           N  
ATOM    530  C2   DT A  17     -24.687  44.979 -21.340  6.00  0.00           C  
ATOM    531  O2   DT A  17     -24.590  43.970 -22.060  0.00  0.00           O  
ATOM    532  N3   DT A  17     -25.883  45.496 -21.040  5.00  0.00           N  
ATOM    533  C4   DT A  17     -26.127  46.409 -20.050  7.00  0.00           C  
ATOM    534  O4   DT A  17     -27.291  46.721 -20.010  6.00  0.00           O  
ATOM    535  C5   DT A  17     -25.038  46.841 -19.250  6.00  0.00           C  
ATOM    536  C6   DT A  17     -23.787  46.417 -19.600  3.00  0.00           C  
ATOM    537  C7   DT A  17     -25.277  47.832 -18.150  2.00  0.00           C  
ATOM    538  OP1  DT A  17     -18.442  42.558 -16.180  9.00  0.00           O  
ATOM    539  OP2  DT A  17     -16.370  42.764 -17.520  9.00  0.00           O1-
ATOM    540  H3   DT A  17     -26.642  45.261 -21.630  8.00  0.00           H  
ATOM    541  H6   DT A  17     -22.973  46.799 -19.020  2.00  0.00           H  
ATOM    542  H1'  DT A  17     -22.265  44.416 -21.920  4.00  0.00           H  
ATOM    543  H2'  DT A  17     -21.117  46.504 -20.010  5.00  0.00           H  
ATOM    544  H3'  DT A  17     -19.036  45.488 -20.470  2.00  0.00           H  
ATOM    545  H4'  DT A  17     -20.292  42.876 -20.440  7.00  0.00           H  
ATOM    546  H5'  DT A  17     -20.285  44.741 -18.000  4.00  0.00           H  
ATOM    547  H71  DT A  17     -26.094  47.419 -17.520  4.00  0.00           H  
ATOM    548  H72  DT A  17     -25.597  48.772 -18.600  6.00  0.00           H  
ATOM    549  H73  DT A  17     -24.333  47.877 -17.550  7.00  0.00           H  
ATOM    550 H2''  DT A  17     -21.084  46.537 -21.840  5.00  0.00           H  
ATOM    551 H5''  DT A  17     -20.375  43.036 -18.000  4.00  0.00           H  
ATOM    552  P    DA A  18     -18.404  44.829 -23.020  8.00  0.00           P  
ATOM    553  C5'  DA A  18     -18.648  42.591 -24.500  5.00  0.00           C  
ATOM    554  O5'  DA A  18     -18.572  44.072 -24.400  4.00  0.00           O  
ATOM    555  C4'  DA A  18     -19.248  42.012 -25.770  7.00  0.00           C  
ATOM    556  O4'  DA A  18     -20.700  41.986 -25.530  0.00  0.00           O  
ATOM    557  C3'  DA A  18     -19.006  42.786 -27.100  7.00  0.00           C  
ATOM    558  O3'  DA A  18     -19.030  41.992 -28.310  0.00  0.00           O  
ATOM    559  C2'  DA A  18     -20.324  43.594 -27.170  6.00  0.00           C  
ATOM    560  C1'  DA A  18     -21.260  42.509 -26.670  9.00  0.00           C  
ATOM    561  N1   DA A  18     -25.889  42.108 -28.890  8.00  0.00           N  
ATOM    562  C2   DA A  18     -24.668  41.749 -29.290  2.00  0.00           C  
ATOM    563  N3   DA A  18     -23.484  42.042 -28.730  5.00  0.00           N  
ATOM    564  C4   DA A  18     -23.669  42.595 -27.470  7.00  0.00           C  
ATOM    565  C5   DA A  18     -24.851  43.002 -26.960  2.00  0.00           C  
ATOM    566  C6   DA A  18     -25.998  42.792 -27.790  5.00  0.00           C  
ATOM    567  N6   DA A  18     -27.269  43.163 -27.430  3.00  0.00           N  
ATOM    568  N7   DA A  18     -24.677  43.500 -25.650  1.00  0.00           N  
ATOM    569  C8   DA A  18     -23.378  43.402 -25.530  1.00  0.00           C  
ATOM    570  N9   DA A  18     -22.674  42.916 -26.550  6.00  0.00           N  
ATOM    571  OP1  DA A  18     -17.267  44.219 -22.350  4.00  0.00           O  
ATOM    572  OP2  DA A  18     -18.356  46.260 -23.220  9.00  0.00           O1-
ATOM    573  H2   DA A  18     -24.581  41.170 -30.210  9.00  0.00           H  
ATOM    574  H8   DA A  18     -22.762  43.687 -24.680  0.00  0.00           H  
ATOM    575  H1'  DA A  18     -21.317  41.801 -27.500  9.00  0.00           H  
ATOM    576  H2'  DA A  18     -20.326  44.472 -26.510  6.00  0.00           H  
ATOM    577  H3'  DA A  18     -18.178  43.507 -26.950  9.00  0.00           H  
ATOM    578  H4'  DA A  18     -18.829  41.015 -25.980  4.00  0.00           H  
ATOM    579  H5'  DA A  18     -19.261  42.209 -23.660  8.00  0.00           H  
ATOM    580  H61  DA A  18     -27.957  42.852 -28.130  6.00  0.00           H  
ATOM    581  H62  DA A  18     -27.444  43.779 -26.690  5.00  0.00           H  
ATOM    582 H2''  DA A  18     -20.640  43.770 -28.180  5.00  0.00           H  
ATOM    583 H5''  DA A  18     -17.641  42.209 -24.310  1.00  0.00           H  
ATOM    584  P    DG A  19     -17.746  41.412 -29.050  6.00  0.00           P  
ATOM    585  C5'  DG A  19     -17.265  39.376 -27.410  4.00  0.00           C  
ATOM    586  O5'  DG A  19     -17.059  40.774 -27.690  3.00  0.00           O  
ATOM    587  C4'  DG A  19     -16.759  38.997 -25.970  5.00  0.00           C  
ATOM    588  O4'  DG A  19     -17.502  39.487 -24.910  0.00  0.00           O  
ATOM    589  C3'  DG A  19     -16.806  37.429 -25.980  9.00  0.00           C  
ATOM    590  O3'  DG A  19     -15.690  36.856 -25.320  8.00  0.00           O  
ATOM    591  C2'  DG A  19     -18.099  37.275 -25.190  3.00  0.00           C  
ATOM    592  C1'  DG A  19     -18.106  38.433 -24.250  8.00  0.00           C  
ATOM    593  N1   DG A  19     -22.991  39.784 -25.310  2.00  0.00           N  
ATOM    594  C2   DG A  19     -22.001  39.351 -26.190  7.00  0.00           C  
ATOM    595  N2   DG A  19     -22.415  39.089 -27.420  5.00  0.00           N  
ATOM    596  N3   DG A  19     -20.841  38.903 -25.720  0.00  0.00           N  
ATOM    597  C4   DG A  19     -20.637  39.081 -24.370  2.00  0.00           C  
ATOM    598  C5   DG A  19     -21.506  39.713 -23.490  2.00  0.00           C  
ATOM    599  C6   DG A  19     -22.841  40.021 -23.990  9.00  0.00           C  
ATOM    600  O6   DG A  19     -23.735  40.569 -23.390  9.00  0.00           O  
ATOM    601  N7   DG A  19     -20.967  39.660 -22.220  1.00  0.00           N  
ATOM    602  C8   DG A  19     -19.715  39.214 -22.420  1.00  0.00           C  
ATOM    603  N9   DG A  19     -19.450  38.827 -23.710  2.00  0.00           N  
ATOM    604  OP1  DG A  19     -16.867  42.517 -29.570  7.00  0.00           O  
ATOM    605  OP2  DG A  19     -18.131  40.299 -29.950  6.00  0.00           O1-
ATOM    606  H1   DG A  19     -23.816  40.024 -25.740  7.00  0.00           H  
ATOM    607  H8   DG A  19     -18.932  39.110 -21.650  8.00  0.00           H  
ATOM    608  H1'  DG A  19     -17.525  38.085 -23.350  2.00  0.00           H  
ATOM    609  H2'  DG A  19     -18.943  37.333 -25.880  5.00  0.00           H  
ATOM    610  H21  DG A  19     -23.437  39.111 -27.580  5.00  0.00           H  
ATOM    611  H3'  DG A  19     -16.908  37.105 -26.990  4.00  0.00           H  
ATOM    612  H22  DG A  19     -21.637  38.852 -28.090  4.00  0.00           H  
ATOM    613  H4'  DG A  19     -15.722  39.228 -25.840  4.00  0.00           H  
ATOM    614  H5'  DG A  19     -16.734  38.864 -28.180  1.00  0.00           H  
ATOM    615 H2''  DG A  19     -18.066  36.352 -24.600  6.00  0.00           H  
ATOM    616 H5''  DG A  19     -18.367  39.200 -27.330  9.00  0.00           H  
ATOM    617  P    DG A  20     -15.359  35.239 -25.300  4.00  0.00           P  
ATOM    618  C5'  DG A  20     -15.736  34.792 -22.690  0.00  0.00           C  
ATOM    619  O5'  DG A  20     -16.196  34.714 -24.090  8.00  0.00           O  
ATOM    620  C4'  DG A  20     -16.802  34.483 -21.660  5.00  0.00           C  
ATOM    621  O4'  DG A  20     -17.866  35.456 -21.780  3.00  0.00           O  
ATOM    622  C3'  DG A  20     -17.399  33.056 -21.820  8.00  0.00           C  
ATOM    623  O3'  DG A  20     -17.503  32.408 -20.560  3.00  0.00           O  
ATOM    624  C2'  DG A  20     -18.761  33.354 -22.440  5.00  0.00           C  
ATOM    625  C1'  DG A  20     -19.081  34.715 -21.690  4.00  0.00           C  
ATOM    626  N1   DG A  20     -22.937  37.389 -19.970  3.00  0.00           N  
ATOM    627  C2   DG A  20     -21.802  36.871 -19.320  1.00  0.00           C  
ATOM    628  N2   DG A  20     -21.580  36.931 -18.030  9.00  0.00           N  
ATOM    629  N3   DG A  20     -20.801  36.172 -19.860  1.00  0.00           N  
ATOM    630  C4   DG A  20     -20.984  36.159 -21.210  6.00  0.00           C  
ATOM    631  C5   DG A  20     -21.976  36.701 -21.980  6.00  0.00           C  
ATOM    632  C6   DG A  20     -23.002  37.406 -21.320  1.00  0.00           C  
ATOM    633  O6   DG A  20     -23.963  38.048 -21.810  6.00  0.00           O  
ATOM    634  N7   DG A  20     -21.877  36.358 -23.310  3.00  0.00           N  
ATOM    635  C8   DG A  20     -20.867  35.590 -23.320  8.00  0.00           C  
ATOM    636  N9   DG A  20     -20.223  35.494 -22.100  3.00  0.00           N  
ATOM    637  OP1  DG A  20     -13.950  34.939 -25.090  4.00  0.00           O  
ATOM    638  OP2  DG A  20     -16.060  34.688 -26.480  6.00  0.00           O1-
ATOM    639  H1   DG A  20     -23.610  37.835 -19.330  3.00  0.00           H  
ATOM    640  H8   DG A  20     -20.471  35.056 -24.190  8.00  0.00           H  
ATOM    641  H1'  DG A  20     -19.156  34.500 -20.590  9.00  0.00           H  
ATOM    642  H2'  DG A  20     -18.708  33.577 -23.460  3.00  0.00           H  
ATOM    643  H21  DG A  20     -22.132  37.522 -17.370  8.00  0.00           H  
ATOM    644  H3'  DG A  20     -16.767  32.436 -22.430  4.00  0.00           H  
ATOM    645  H22  DG A  20     -20.739  36.538 -17.770  2.00  0.00           H  
ATOM    646  H4'  DG A  20     -16.270  34.590 -20.710  4.00  0.00           H  
ATOM    647  H5'  DG A  20     -15.308  35.649 -22.500  9.00  0.00           H  
ATOM    648 H2''  DG A  20     -19.560  32.595 -22.280  9.00  0.00           H  
ATOM    649 H5''  DG A  20     -15.055  34.027 -22.610  9.00  0.00           H  
ATOM    650  P    DG A  21     -16.669  31.170 -20.130  8.00  0.00           P  
ATOM    651  C5'  DG A  21     -18.301  30.456 -18.190  9.00  0.00           C  
ATOM    652  O5'  DG A  21     -17.048  30.984 -18.550  6.00  0.00           O  
ATOM    653  C4'  DG A  21     -18.576  30.632 -16.720  8.00  0.00           C  
ATOM    654  O4'  DG A  21     -19.105  31.991 -16.510  4.00  0.00           O  
ATOM    655  C3'  DG A  21     -19.633  29.708 -16.260  9.00  0.00           C  
ATOM    656  O3'  DG A  21     -19.418  29.362 -14.870  9.00  0.00           O  
ATOM    657  C2'  DG A  21     -20.928  30.459 -16.370  3.00  0.00           C  
ATOM    658  C1'  DG A  21     -20.443  31.892 -16.010  8.00  0.00           C  
ATOM    659  N1   DG A  21     -23.096  33.992 -19.820  2.00  0.00           N  
ATOM    660  C2   DG A  21     -22.051  33.190 -19.920  8.00  0.00           C  
ATOM    661  N2   DG A  21     -21.932  32.539 -21.060  1.00  0.00           N  
ATOM    662  N3   DG A  21     -21.381  32.723 -18.890  6.00  0.00           N  
ATOM    663  C4   DG A  21     -21.806  33.298 -17.730  9.00  0.00           C  
ATOM    664  C5   DG A  21     -22.890  34.049 -17.540  2.00  0.00           C  
ATOM    665  C6   DG A  21     -23.704  34.339 -18.650  4.00  0.00           C  
ATOM    666  O6   DG A  21     -24.842  34.747 -18.700  5.00  0.00           O  
ATOM    667  N7   DG A  21     -23.087  34.386 -16.170  9.00  0.00           N  
ATOM    668  C8   DG A  21     -22.072  33.716 -15.640  1.00  0.00           C  
ATOM    669  N9   DG A  21     -21.371  32.962 -16.500  7.00  0.00           N  
ATOM    670  OP1  DG A  21     -15.222  31.508 -20.160  8.00  0.00           O  
ATOM    671  OP2  DG A  21     -17.229  30.034 -20.870  3.00  0.00           O1-
ATOM    672  H1   DG A  21     -23.699  34.023 -20.680  9.00  0.00           H  
ATOM    673  H8   DG A  21     -21.810  33.765 -14.550  5.00  0.00           H  
ATOM    674  H1'  DG A  21     -20.345  32.027 -14.820  2.00  0.00           H  
ATOM    675  H2'  DG A  21     -21.315  30.476 -17.340  2.00  0.00           H  
ATOM    676  H21  DG A  21     -22.416  32.789 -21.930  5.00  0.00           H  
ATOM    677  H3'  DG A  21     -19.720  28.880 -16.900  3.00  0.00           H  
ATOM    678  H22  DG A  21     -21.263  31.809 -21.060  5.00  0.00           H  
ATOM    679  H4'  DG A  21     -17.660  30.536 -16.030  9.00  0.00           H  
ATOM    680  H5'  DG A  21     -18.414  29.418 -18.420  0.00  0.00           H  
ATOM    681 H2''  DG A  21     -21.630  30.240 -15.550  7.00  0.00           H  
ATOM    682 H5''  DG A  21     -19.131  30.958 -18.780  0.00  0.00           H  
ATOM    683  P    DT A  22     -19.172  27.781 -14.390  9.00  0.00           P  
ATOM    684  C5'  DT A  22     -20.876  25.708 -14.410  2.00  0.00           C  
ATOM    685  O5'  DT A  22     -20.650  27.066 -14.590  4.00  0.00           O  
ATOM    686  C4'  DT A  22     -22.283  25.229 -14.950  9.00  0.00           C  
ATOM    687  O4'  DT A  22     -23.319  25.749 -14.140  9.00  0.00           O  
ATOM    688  C3'  DT A  22     -22.467  25.714 -16.430  6.00  0.00           C  
ATOM    689  O3'  DT A  22     -23.080  24.714 -17.140  0.00  0.00           O  
ATOM    690  C2'  DT A  22     -23.175  27.019 -16.240  2.00  0.00           C  
ATOM    691  C1'  DT A  22     -24.002  26.722 -14.960  7.00  0.00           C  
ATOM    692  N1   DT A  22     -24.344  27.981 -14.250  8.00  0.00           N  
ATOM    693  C2   DT A  22     -25.705  28.345 -14.270  7.00  0.00           C  
ATOM    694  O2   DT A  22     -26.651  27.561 -14.580  5.00  0.00           O  
ATOM    695  N3   DT A  22     -25.948  29.595 -13.810  4.00  0.00           N  
ATOM    696  C4   DT A  22     -25.059  30.490 -13.230  4.00  0.00           C  
ATOM    697  O4   DT A  22     -25.463  31.596 -12.940  1.00  0.00           O  
ATOM    698  C5   DT A  22     -23.691  29.938 -13.170  0.00  0.00           C  
ATOM    699  C6   DT A  22     -23.360  28.787 -13.710  1.00  0.00           C  
ATOM    700  C7   DT A  22     -22.624  30.771 -12.510  7.00  0.00           C  
ATOM    701  OP1  DT A  22     -18.946  27.807 -12.910  6.00  0.00           O  
ATOM    702  OP2  DT A  22     -18.096  27.187 -15.200  1.00  0.00           O1-
ATOM    703  H3   DT A  22     -26.950  29.806 -13.720  4.00  0.00           H  
ATOM    704  H6   DT A  22     -22.393  28.368 -13.670  2.00  0.00           H  
ATOM    705  H1'  DT A  22     -24.924  26.310 -15.380  4.00  0.00           H  
ATOM    706  H2'  DT A  22     -22.417  27.802 -16.140  6.00  0.00           H  
ATOM    707  H3'  DT A  22     -21.456  25.930 -16.760  1.00  0.00           H  
ATOM    708  H4'  DT A  22     -22.421  24.156 -14.910  7.00  0.00           H  
ATOM    709  H5'  DT A  22     -20.819  25.468 -13.270  5.00  0.00           H  
ATOM    710  H71  DT A  22     -21.596  30.392 -12.780  5.00  0.00           H  
ATOM    711  H72  DT A  22     -22.638  31.824 -12.940  8.00  0.00           H  
ATOM    712  H73  DT A  22     -22.865  30.894 -11.450  4.00  0.00           H  
ATOM    713 H2''  DT A  22     -23.850  27.322 -17.050  8.00  0.00           H  
ATOM    714 H5''  DT A  22     -20.136  25.053 -14.920  8.00  0.00           H  
ATOM    715  P    DT A  23     -23.078  24.603 -18.780  6.00  0.00           P  
ATOM    716  C5'  DT A  23     -25.624  24.617 -19.220  5.00  0.00           C  
ATOM    717  O5'  DT A  23     -24.377  25.256 -19.310  5.00  0.00           O  
ATOM    718  C4'  DT A  23     -26.801  25.551 -19.510  1.00  0.00           C  
ATOM    719  O4'  DT A  23     -27.052  26.343 -18.380  7.00  0.00           O  
ATOM    720  C3'  DT A  23     -26.536  26.574 -20.580  5.00  0.00           C  
ATOM    721  O3'  DT A  23     -26.526  25.844 -21.840  5.00  0.00           O  
ATOM    722  C2'  DT A  23     -27.621  27.611 -20.260  8.00  0.00           C  
ATOM    723  C1'  DT A  23     -27.817  27.403 -18.790  5.00  0.00           C  
ATOM    724  N1   DT A  23     -27.466  28.612 -18.030  1.00  0.00           N  
ATOM    725  C2   DT A  23     -28.511  29.222 -17.330  2.00  0.00           C  
ATOM    726  O2   DT A  23     -29.694  28.776 -17.330  2.00  0.00           O  
ATOM    727  N3   DT A  23     -28.259  30.423 -16.810  0.00  0.00           N  
ATOM    728  C4   DT A  23     -27.104  31.060 -16.720  4.00  0.00           C  
ATOM    729  O4   DT A  23     -26.990  32.037 -16.010  0.00  0.00           O  
ATOM    730  C5   DT A  23     -25.996  30.316 -17.350  4.00  0.00           C  
ATOM    731  C6   DT A  23     -26.181  29.153 -18.000  6.00  0.00           C  
ATOM    732  C7   DT A  23     -24.571  30.934 -17.190  8.00  0.00           C  
ATOM    733  OP1  DT A  23     -23.145  23.183 -19.080  3.00  0.00           O  
ATOM    734  OP2  DT A  23     -21.894  25.368 -19.190  8.00  0.00           O1-
ATOM    735  H3   DT A  23     -29.023  30.784 -16.290  5.00  0.00           H  
ATOM    736  H6   DT A  23     -25.350  28.698 -18.510  1.00  0.00           H  
ATOM    737  H1'  DT A  23     -28.866  27.259 -18.660  3.00  0.00           H  
ATOM    738  H2'  DT A  23     -27.369  28.593 -20.500  2.00  0.00           H  
ATOM    739  H3'  DT A  23     -25.604  26.955 -20.300  6.00  0.00           H  
ATOM    740  H4'  DT A  23     -27.649  25.043 -19.790  5.00  0.00           H  
ATOM    741  H5'  DT A  23     -25.864  24.200 -18.220  1.00  0.00           H  
ATOM    742  H71  DT A  23     -24.583  32.006 -17.460  2.00  0.00           H  
ATOM    743  H72  DT A  23     -24.475  31.024 -16.110  4.00  0.00           H  
ATOM    744  H73  DT A  23     -23.852  30.324 -17.730  0.00  0.00           H  
ATOM    745 H2''  DT A  23     -28.622  27.525 -20.710  7.00  0.00           H  
ATOM    746 H5''  DT A  23     -25.655  23.789 -19.930  2.00  0.00           H  
ATOM    747  P    DA A  24     -26.375  26.524 -23.210  8.00  0.00           P  
ATOM    748  C5'  DA A  24     -28.876  26.430 -23.860  3.00  0.00           C  
ATOM    749  O5'  DA A  24     -27.745  27.201 -23.660  4.00  0.00           O  
ATOM    750  C4'  DA A  24     -30.253  27.103 -23.780  8.00  0.00           C  
ATOM    751  O4'  DA A  24     -30.534  27.750 -22.480  4.00  0.00           O  
ATOM    752  C3'  DA A  24     -30.336  28.210 -24.840  9.00  0.00           C  
ATOM    753  O3'  DA A  24     -31.666  28.083 -25.260  4.00  0.00           O  
ATOM    754  C2'  DA A  24     -30.045  29.387 -23.920  3.00  0.00           C  
ATOM    755  C1'  DA A  24     -30.908  29.087 -22.720  4.00  0.00           C  
ATOM    756  N1   DA A  24     -27.867  32.152 -19.750  2.00  0.00           N  
ATOM    757  C2   DA A  24     -27.580  31.393 -20.870  7.00  0.00           C  
ATOM    758  N3   DA A  24     -28.431  30.645 -21.530  1.00  0.00           N  
ATOM    759  C4   DA A  24     -29.743  30.680 -21.090  2.00  0.00           C  
ATOM    760  C5   DA A  24     -30.185  31.402 -19.980  7.00  0.00           C  
ATOM    761  C6   DA A  24     -29.180  32.131 -19.320  0.00  0.00           C  
ATOM    762  N6   DA A  24     -29.227  32.890 -18.280  6.00  0.00           N  
ATOM    763  N7   DA A  24     -31.538  31.224 -19.800  0.00  0.00           N  
ATOM    764  C8   DA A  24     -31.873  30.349 -20.710  7.00  0.00           C  
ATOM    765  N9   DA A  24     -30.861  30.008 -21.580  1.00  0.00           N  
ATOM    766  OP1  DA A  24     -26.111  25.434 -24.190  7.00  0.00           O  
ATOM    767  OP2  DA A  24     -25.412  27.619 -23.060  4.00  0.00           O1-
ATOM    768  H2   DA A  24     -26.534  31.252 -21.150  8.00  0.00           H  
ATOM    769  H8   DA A  24     -32.905  29.941 -20.850  3.00  0.00           H  
ATOM    770  H1'  DA A  24     -31.990  28.905 -22.960  8.00  0.00           H  
ATOM    771  H2'  DA A  24     -29.028  29.423 -23.620  0.00  0.00           H  
ATOM    772  H3'  DA A  24     -29.563  28.234 -25.590  5.00  0.00           H  
ATOM    773  H4'  DA A  24     -31.030  26.369 -23.960  7.00  0.00           H  
ATOM    774  H5'  DA A  24     -28.925  25.595 -23.100  1.00  0.00           H  
ATOM    775  H61  DA A  24     -28.375  33.372 -17.960  2.00  0.00           H  
ATOM    776  H62  DA A  24     -30.074  33.125 -17.880  5.00  0.00           H  
ATOM    777 H2''  DA A  24     -30.293  30.316 -24.380  7.00  0.00           H  
ATOM    778 H5''  DA A  24     -28.779  26.105 -24.910  9.00  0.00           H  
ATOM    779  P    DG A  25     -32.385  29.130 -26.230  7.00  0.00           P  
ATOM    780  C5'  DG A  25     -34.346  29.997 -24.730  5.00  0.00           C  
ATOM    781  O5'  DG A  25     -33.059  30.271 -25.360  4.00  0.00           O  
ATOM    782  C4'  DG A  25     -34.701  31.150 -23.740  2.00  0.00           C  
ATOM    783  O4'  DG A  25     -33.640  31.438 -22.870  1.00  0.00           O  
ATOM    784  C3'  DG A  25     -35.141  32.542 -24.270  7.00  0.00           C  
ATOM    785  O3'  DG A  25     -36.247  33.017 -23.520  2.00  0.00           O  
ATOM    786  C2'  DG A  25     -33.866  33.346 -24.080  4.00  0.00           C  
ATOM    787  C1'  DG A  25     -33.398  32.824 -22.780  7.00  0.00           C  
ATOM    788  N1   DG A  25     -30.351  36.092 -20.090  4.00  0.00           N  
ATOM    789  C2   DG A  25     -31.684  35.870 -19.910  2.00  0.00           C  
ATOM    790  N2   DG A  25     -32.285  36.553 -19.000  2.00  0.00           N  
ATOM    791  N3   DG A  25     -32.409  35.017 -20.670  1.00  0.00           N  
ATOM    792  C4   DG A  25     -31.641  34.223 -21.580  6.00  0.00           C  
ATOM    793  C5   DG A  25     -30.290  34.430 -21.750  2.00  0.00           C  
ATOM    794  C6   DG A  25     -29.593  35.527 -21.090  5.00  0.00           C  
ATOM    795  O6   DG A  25     -28.452  35.876 -21.270  0.00  0.00           O  
ATOM    796  N7   DG A  25     -29.801  33.549 -22.730  2.00  0.00           N  
ATOM    797  C8   DG A  25     -30.896  32.984 -23.170  7.00  0.00           C  
ATOM    798  N9   DG A  25     -32.033  33.300 -22.500  7.00  0.00           N  
ATOM    799  OP1  DG A  25     -33.457  28.393 -26.920  6.00  0.00           O  
ATOM    800  OP2  DG A  25     -31.302  29.746 -26.970  8.00  0.00           O1-
ATOM    801  H1   DG A  25     -29.749  36.491 -19.390  3.00  0.00           H  
ATOM    802  H8   DG A  25     -30.877  32.259 -24.010  7.00  0.00           H  
ATOM    803  H1'  DG A  25     -34.090  33.161 -21.990  6.00  0.00           H  
ATOM    804  H2'  DG A  25     -33.126  33.069 -24.750  2.00  0.00           H  
ATOM    805  H21  DG A  25     -31.687  37.128 -18.440  8.00  0.00           H  
ATOM    806  H3'  DG A  25     -35.496  32.395 -25.310  2.00  0.00           H  
ATOM    807  H22  DG A  25     -33.262  36.428 -18.970  5.00  0.00           H  
ATOM    808  H4'  DG A  25     -35.580  30.809 -23.160  7.00  0.00           H  
ATOM    809  H5'  DG A  25     -34.305  29.093 -24.210  4.00  0.00           H  
ATOM    810 H2''  DG A  25     -34.087  34.449 -24.160  9.00  0.00           H  
ATOM    811 H5''  DG A  25     -35.135  29.852 -25.570  9.00  0.00           H  
ATOM    812  P    DG A  26     -37.185  34.297 -23.940  1.00  0.00           P  
ATOM    813  C5'  DG A  26     -35.593  35.873 -22.500  5.00  0.00           C  
ATOM    814  O5'  DG A  26     -36.912  35.426 -22.910  5.00  0.00           O  
ATOM    815  C4'  DG A  26     -35.876  37.020 -21.510  5.00  0.00           C  
ATOM    816  O4'  DG A  26     -34.603  37.298 -20.890  6.00  0.00           O  
ATOM    817  C3'  DG A  26     -36.357  38.221 -22.260  7.00  0.00           C  
ATOM    818  O3'  DG A  26     -37.208  38.973 -21.310  8.00  0.00           O  
ATOM    819  C2'  DG A  26     -35.051  38.845 -22.600  4.00  0.00           C  
ATOM    820  C1'  DG A  26     -34.300  38.644 -21.300  7.00  0.00           C  
ATOM    821  N1   DG A  26     -29.756  38.071 -23.780  9.00  0.00           N  
ATOM    822  C2   DG A  26     -31.022  37.586 -24.140  5.00  0.00           C  
ATOM    823  N2   DG A  26     -31.007  36.815 -25.200  8.00  0.00           N  
ATOM    824  N3   DG A  26     -32.158  37.716 -23.450  3.00  0.00           N  
ATOM    825  C4   DG A  26     -31.921  38.542 -22.310  5.00  0.00           C  
ATOM    826  C5   DG A  26     -30.792  39.036 -21.910  6.00  0.00           C  
ATOM    827  C6   DG A  26     -29.596  38.834 -22.640  7.00  0.00           C  
ATOM    828  O6   DG A  26     -28.454  39.325 -22.510  8.00  0.00           O  
ATOM    829  N7   DG A  26     -30.875  39.742 -20.700  3.00  0.00           N  
ATOM    830  C8   DG A  26     -32.120  39.718 -20.440  6.00  0.00           C  
ATOM    831  N9   DG A  26     -32.855  39.044 -21.400  0.00  0.00           N  
ATOM    832  OP1  DG A  26     -38.625  33.939 -23.690  3.00  0.00           O  
ATOM    833  OP2  DG A  26     -36.821  34.755 -25.300  3.00  0.00           O1-
ATOM    834  H1   DG A  26     -29.008  37.794 -24.300  1.00  0.00           H  
ATOM    835  H8   DG A  26     -32.599  40.249 -19.610  6.00  0.00           H  
ATOM    836  H1'  DG A  26     -34.807  39.297 -20.580  6.00  0.00           H  
ATOM    837  H2'  DG A  26     -34.680  38.426 -23.570  8.00  0.00           H  
ATOM    838  H21  DG A  26     -30.089  36.635 -25.550  9.00  0.00           H  
ATOM    839  H3'  DG A  26     -36.928  37.791 -23.060  3.00  0.00           H  
ATOM    840  H22  DG A  26     -31.858  36.316 -25.420  6.00  0.00           H  
ATOM    841  H4'  DG A  26     -36.600  36.654 -20.770  7.00  0.00           H  
ATOM    842  H5'  DG A  26     -34.926  36.157 -23.330  0.00  0.00           H  
ATOM    843 H2''  DG A  26     -35.197  39.788 -22.930  7.00  0.00           H  
ATOM    844 H5''  DG A  26     -35.125  35.171 -21.850  8.00  0.00           H  
ATOM    845  P    DG A  27     -37.860  40.387 -21.780  3.00  0.00           P  
ATOM    846  C5'  DG A  27     -36.323  41.734 -20.250  4.00  0.00           C  
ATOM    847  O5'  DG A  27     -36.700  41.437 -21.550  3.00  0.00           O  
ATOM    848  C4'  DG A  27     -35.169  42.714 -20.180  1.00  0.00           C  
ATOM    849  O4'  DG A  27     -33.984  42.223 -20.810  9.00  0.00           O  
ATOM    850  C3'  DG A  27     -35.276  44.037 -20.850  5.00  0.00           C  
ATOM    851  O3'  DG A  27     -35.132  45.089 -19.910  8.00  0.00           O  
ATOM    852  C2'  DG A  27     -34.083  44.170 -21.780  0.00  0.00           C  
ATOM    853  C1'  DG A  27     -33.110  43.354 -21.000  6.00  0.00           C  
ATOM    854  N1   DG A  27     -28.163  42.963 -20.680  6.00  0.00           N  
ATOM    855  C2   DG A  27     -29.031  43.479 -19.790  1.00  0.00           C  
ATOM    856  N2   DG A  27     -28.479  44.017 -18.690  1.00  0.00           N  
ATOM    857  N3   DG A  27     -30.357  43.523 -19.910  8.00  0.00           N  
ATOM    858  C4   DG A  27     -30.704  43.030 -21.160  7.00  0.00           C  
ATOM    859  C5   DG A  27     -29.867  42.543 -22.120  8.00  0.00           C  
ATOM    860  C6   DG A  27     -28.473  42.557 -21.910  3.00  0.00           C  
ATOM    861  O6   DG A  27     -27.577  42.270 -22.720  8.00  0.00           O  
ATOM    862  N7   DG A  27     -30.550  42.260 -23.330  2.00  0.00           N  
ATOM    863  C8   DG A  27     -31.778  42.530 -22.980  2.00  0.00           C  
ATOM    864  N9   DG A  27     -31.933  42.919 -21.700  8.00  0.00           N  
ATOM    865  OP1  DG A  27     -38.921  40.827 -20.950  3.00  0.00           O  
ATOM    866  OP2  DG A  27     -38.112  40.344 -23.230  3.00  0.00           O1-
ATOM    867  H1   DG A  27     -27.149  42.946 -20.370  4.00  0.00           H  
ATOM    868  H8   DG A  27     -32.616  42.349 -23.620  3.00  0.00           H  
ATOM    869  H1'  DG A  27     -32.977  43.825 -20.010  2.00  0.00           H  
ATOM    870  H2'  DG A  27     -34.305  43.676 -22.710  6.00  0.00           H  
ATOM    871  H21  DG A  27     -27.479  43.951 -18.530  6.00  0.00           H  
ATOM    872  H3'  DG A  27     -36.269  44.049 -21.310  5.00  0.00           H  
ATOM    873  H22  DG A  27     -29.051  44.389 -17.910  7.00  0.00           H  
ATOM    874  H4'  DG A  27     -34.981  42.865 -19.110  1.00  0.00           H  
ATOM    875  H5'  DG A  27     -35.942  40.847 -19.720  0.00  0.00           H  
ATOM    876 H2''  DG A  27     -33.696  45.183 -21.930  8.00  0.00           H  
ATOM    877 H5''  DG A  27     -37.154  42.157 -19.720  9.00  0.00           H  
ATOM    878  P    DT A  28     -35.876  46.493 -20.060  5.00  0.00           P  
ATOM    879  C5'  DT A  28     -35.384  48.946 -20.870  5.00  0.00           C  
ATOM    880  O5'  DT A  28     -34.963  47.599 -20.700  8.00  0.00           O  
ATOM    881  C4'  DT A  28     -34.184  49.900 -21.280  9.00  0.00           C  
ATOM    882  O4'  DT A  28     -33.247  49.988 -20.220  9.00  0.00           O  
ATOM    883  C3'  DT A  28     -33.427  49.509 -22.560  6.00  0.00           C  
ATOM    884  O3'  DT A  28     -33.032  50.768 -23.090  8.00  0.00           O  
ATOM    885  C2'  DT A  28     -32.344  48.563 -21.910  2.00  0.00           C  
ATOM    886  C1'  DT A  28     -32.019  49.405 -20.640  1.00  0.00           C  
ATOM    887  N1   DT A  28     -31.533  48.603 -19.460  1.00  0.00           N  
ATOM    888  C2   DT A  28     -30.167  48.492 -19.260  0.00  0.00           C  
ATOM    889  O2   DT A  28     -29.320  49.190 -19.830  8.00  0.00           O  
ATOM    890  N3   DT A  28     -29.646  47.558 -18.340  7.00  0.00           N  
ATOM    891  C4   DT A  28     -30.473  46.698 -17.610  7.00  0.00           C  
ATOM    892  O4   DT A  28     -29.998  45.826 -16.830  0.00  0.00           O  
ATOM    893  C5   DT A  28     -31.905  46.977 -17.770  1.00  0.00           C  
ATOM    894  C6   DT A  28     -32.376  47.911 -18.630  1.00  0.00           C  
ATOM    895  C7   DT A  28     -32.941  46.148 -17.160  3.00  0.00           C  
ATOM    896  OP1  DT A  28     -36.128  46.995 -18.670  2.00  0.00           O  
ATOM    897  OP2  DT A  28     -37.018  46.220 -20.900  0.00  0.00           O1-
ATOM    898  H3   DT A  28     -28.689  47.251 -18.450  7.00  0.00           H  
ATOM    899  H6   DT A  28     -33.407  48.135 -18.740  3.00  0.00           H  
ATOM    900  H1'  DT A  28     -31.299  50.168 -20.980  1.00  0.00           H  
ATOM    901  H2'  DT A  28     -32.796  47.591 -21.610  6.00  0.00           H  
ATOM    902  H3'  DT A  28     -34.137  48.909 -23.240  5.00  0.00           H  
ATOM    903  H4'  DT A  28     -34.539  50.889 -21.320  4.00  0.00           H  
ATOM    904  H5'  DT A  28     -35.803  49.350 -19.980  8.00  0.00           H  
ATOM    905  H71  DT A  28     -32.851  45.078 -17.500  1.00  0.00           H  
ATOM    906  H72  DT A  28     -32.916  46.207 -16.100  5.00  0.00           H  
ATOM    907  H73  DT A  28     -33.887  46.364 -17.570  3.00  0.00           H  
ATOM    908 H2''  DT A  28     -31.419  48.485 -22.480  2.00  0.00           H  
ATOM    909 H5''  DT A  28     -36.104  48.979 -21.690  7.00  0.00           H  
ATOM    910  P    DT A  29     -33.887  51.474 -24.280  8.00  0.00           P  
ATOM    911  C5'  DT A  29     -33.832  51.110 -26.850  6.00  0.00           C  
ATOM    912  O5'  DT A  29     -33.303  50.740 -25.600  4.00  0.00           O  
ATOM    913  C4'  DT A  29     -33.358  50.147 -27.930  4.00  0.00           C  
ATOM    914  O4'  DT A  29     -31.942  50.129 -27.840  8.00  0.00           O  
ATOM    915  C3'  DT A  29     -33.869  48.748 -27.920  8.00  0.00           C  
ATOM    916  O3'  DT A  29     -34.004  48.359 -29.250  6.00  0.00           O  
ATOM    917  C2'  DT A  29     -32.769  47.980 -27.180  4.00  0.00           C  
ATOM    918  C1'  DT A  29     -31.591  48.751 -27.740  8.00  0.00           C  
ATOM    919  N1   DT A  29     -30.298  48.558 -27.000  6.00  0.00           N  
ATOM    920  C2   DT A  29     -29.214  47.981 -27.600  8.00  0.00           C  
ATOM    921  O2   DT A  29     -29.242  47.459 -28.690  3.00  0.00           O  
ATOM    922  N3   DT A  29     -28.008  47.970 -26.910  5.00  0.00           N  
ATOM    923  C4   DT A  29     -27.807  48.495 -25.680  9.00  0.00           C  
ATOM    924  O4   DT A  29     -26.685  48.683 -25.230  6.00  0.00           O  
ATOM    925  C5   DT A  29     -29.052  49.018 -25.110  8.00  0.00           C  
ATOM    926  C6   DT A  29     -30.254  48.922 -25.680  8.00  0.00           C  
ATOM    927  C7   DT A  29     -28.977  49.620 -23.670  5.00  0.00           C  
ATOM    928  OP1  DT A  29     -33.420  52.889 -24.350  4.00  0.00           O  
ATOM    929  OP2  DT A  29     -35.321  51.183 -24.100  3.00  0.00           O1-
ATOM    930  H3   DT A  29     -27.207  47.551 -27.350  1.00  0.00           H  
ATOM    931  H6   DT A  29     -31.154  49.285 -25.100  1.00  0.00           H  
ATOM    932  H1'  DT A  29     -31.449  48.465 -28.780  3.00  0.00           H  
ATOM    933  H2'  DT A  29     -32.964  48.020 -26.110  2.00  0.00           H  
ATOM    934  H3'  DT A  29     -34.820  48.683 -27.320  1.00  0.00           H  
ATOM    935  H4'  DT A  29     -33.721  50.604 -28.870  2.00  0.00           H  
ATOM    936  H5'  DT A  29     -33.379  52.038 -26.950  6.00  0.00           H  
ATOM    937  H71  DT A  29     -29.924  50.028 -23.240  2.00  0.00           H  
ATOM    938  H72  DT A  29     -28.856  48.694 -23.060  2.00  0.00           H  
ATOM    939  H73  DT A  29     -28.220  50.311 -23.670  4.00  0.00           H  
ATOM    940 H2''  DT A  29     -32.748  46.975 -27.430  7.00  0.00           H  
ATOM    941 H5''  DT A  29     -34.956  51.286 -26.810  0.00  0.00           H  
ATOM    942  P    DA A  30     -34.857  47.120 -29.670  1.00  0.00           P  
ATOM    943  C5'  DA A  30     -32.674  45.597 -30.060  2.00  0.00           C  
ATOM    944  O5'  DA A  30     -33.870  45.918 -29.350  8.00  0.00           O  
ATOM    945  C4'  DA A  30     -31.654  44.668 -29.360  5.00  0.00           C  
ATOM    946  O4'  DA A  30     -30.977  45.214 -28.270  1.00  0.00           O  
ATOM    947  C3'  DA A  30     -32.333  43.375 -28.840  6.00  0.00           C  
ATOM    948  O3'  DA A  30     -31.563  42.225 -29.040  0.00  0.00           O  
ATOM    949  C2'  DA A  30     -32.311  43.600 -27.320  2.00  0.00           C  
ATOM    950  C1'  DA A  30     -30.952  44.294 -27.220  2.00  0.00           C  
ATOM    951  N1   DA A  30     -28.005  45.641 -23.080  0.00  0.00           N  
ATOM    952  C2   DA A  30     -27.661  45.251 -24.290  4.00  0.00           C  
ATOM    953  N3   DA A  30     -28.478  45.051 -25.320  5.00  0.00           N  
ATOM    954  C4   DA A  30     -29.803  45.191 -24.990  1.00  0.00           C  
ATOM    955  C5   DA A  30     -30.311  45.544 -23.790  7.00  0.00           C  
ATOM    956  C6   DA A  30     -29.309  45.842 -22.820  7.00  0.00           C  
ATOM    957  N6   DA A  30     -29.492  46.250 -21.540  2.00  0.00           N  
ATOM    958  N7   DA A  30     -31.683  45.548 -23.800  1.00  0.00           N  
ATOM    959  C8   DA A  30     -31.974  45.358 -25.070  6.00  0.00           C  
ATOM    960  N9   DA A  30     -30.892  44.980 -25.840  7.00  0.00           N  
ATOM    961  OP1  DA A  30     -35.208  47.148 -31.100  1.00  0.00           O  
ATOM    962  OP2  DA A  30     -35.991  46.990 -28.710  0.00  0.00           O1-
ATOM    963  H2   DA A  30     -26.615  45.124 -24.540  6.00  0.00           H  
ATOM    964  H8   DA A  30     -33.002  45.333 -25.370  1.00  0.00           H  
ATOM    965  H1'  DA A  30     -30.112  43.610 -27.370  6.00  0.00           H  
ATOM    966  H2'  DA A  30     -33.125  44.229 -27.050  8.00  0.00           H  
ATOM    967  H3'  DA A  30     -33.297  43.233 -29.310  3.00  0.00           H  
ATOM    968  H4'  DA A  30     -30.821  44.456 -30.100  3.00  0.00           H  
ATOM    969  H5'  DA A  30     -32.065  46.472 -30.270  8.00  0.00           H  
ATOM    970  H61  DA A  30     -28.715  46.370 -20.880  4.00  0.00           H  
ATOM    971  H62  DA A  30     -30.448  46.505 -21.260  0.00  0.00           H  
ATOM    972 H2''  DA A  30     -32.402  42.655 -26.830  9.00  0.00           H  
ATOM    973 H5''  DA A  30     -33.015  45.172 -31.030  4.00  0.00           H  
ATOM    974  P    DG A  31     -32.275  40.824 -29.300  6.00  0.00           P  
ATOM    975  C5'  DG A  31     -30.837  40.117 -31.400  3.00  0.00           C  
ATOM    976  O5'  DG A  31     -31.080  40.047 -30.000  6.00  0.00           O  
ATOM    977  C4'  DG A  31     -29.599  39.321 -31.880  0.00  0.00           C  
ATOM    978  O4'  DG A  31     -28.448  39.611 -31.070  9.00  0.00           O  
ATOM    979  C3'  DG A  31     -29.912  37.884 -31.570  3.00  0.00           C  
ATOM    980  O3'  DG A  31     -29.345  37.107 -32.560  8.00  0.00           O  
ATOM    981  C2'  DG A  31     -29.278  37.683 -30.180  5.00  0.00           C  
ATOM    982  C1'  DG A  31     -28.018  38.504 -30.270  6.00  0.00           C  
ATOM    983  N1   DG A  31     -28.136  40.553 -25.520  1.00  0.00           N  
ATOM    984  C2   DG A  31     -29.161  40.302 -26.310  7.00  0.00           C  
ATOM    985  N2   DG A  31     -30.367  40.550 -25.830  9.00  0.00           N  
ATOM    986  N3   DG A  31     -29.035  39.697 -27.510  4.00  0.00           N  
ATOM    987  C4   DG A  31     -27.757  39.345 -27.830  8.00  0.00           C  
ATOM    988  C5   DG A  31     -26.661  39.569 -26.980  4.00  0.00           C  
ATOM    989  C6   DG A  31     -26.873  40.220 -25.720  7.00  0.00           C  
ATOM    990  O6   DG A  31     -26.160  40.300 -24.760  1.00  0.00           O  
ATOM    991  N7   DG A  31     -25.559  38.976 -27.500  1.00  0.00           N  
ATOM    992  C8   DG A  31     -25.957  38.599 -28.700  2.00  0.00           C  
ATOM    993  N9   DG A  31     -27.275  38.775 -28.970  9.00  0.00           N  
ATOM    994  OP1  DG A  31     -33.394  40.821 -30.260  4.00  0.00           O  
ATOM    995  OP2  DG A  31     -32.505  40.172 -27.970  9.00  0.00           O1-
ATOM    996  H1   DG A  31     -28.384  40.908 -24.590  2.00  0.00           H  
ATOM    997  H8   DG A  31     -25.276  38.229 -29.470  1.00  0.00           H  
ATOM    998  H1'  DG A  31     -27.331  37.969 -30.850  4.00  0.00           H  
ATOM    999  H2'  DG A  31     -29.897  38.015 -29.390  5.00  0.00           H  
ATOM   1000  H21  DG A  31     -30.498  40.892 -24.890  2.00  0.00           H  
ATOM   1001  H3'  DG A  31     -30.959  37.702 -31.560  8.00  0.00           H  
ATOM   1002  H22  DG A  31     -31.130  40.243 -26.430  0.00  0.00           H  
ATOM   1003  H4'  DG A  31     -29.391  39.581 -32.970  1.00  0.00           H  
ATOM   1004  H5'  DG A  31     -30.690  41.170 -31.770  6.00  0.00           H  
ATOM   1005 H2''  DG A  31     -29.094  36.595 -29.980  1.00  0.00           H  
ATOM   1006 H5''  DG A  31     -31.735  39.694 -31.930  8.00  0.00           H  
ATOM   1007  P    DG A  32     -29.761  35.634 -32.880  0.00  0.00           P  
ATOM   1008  C5'  DG A  32     -27.705  34.380 -32.350  5.00  0.00           C  
ATOM   1009  O5'  DG A  32     -29.006  34.594 -32.040  0.00  0.00           O  
ATOM   1010  C4'  DG A  32     -26.957  33.784 -31.130  4.00  0.00           C  
ATOM   1011  O4'  DG A  32     -26.586  34.769 -30.210  8.00  0.00           O  
ATOM   1012  C3'  DG A  32     -27.676  32.667 -30.340  7.00  0.00           C  
ATOM   1013  O3'  DG A  32     -26.728  31.710 -29.930  8.00  0.00           O  
ATOM   1014  C2'  DG A  32     -28.177  33.413 -29.170  5.00  0.00           C  
ATOM   1015  C1'  DG A  32     -26.908  34.306 -28.960  6.00  0.00           C  
ATOM   1016  N1   DG A  32     -24.810  36.552 -24.810  8.00  0.00           N  
ATOM   1017  C2   DG A  32     -24.192  36.063 -25.950  1.00  0.00           C  
ATOM   1018  N2   DG A  32     -22.911  36.100 -26.010  8.00  0.00           N  
ATOM   1019  N3   DG A  32     -24.830  35.686 -27.010  9.00  0.00           N  
ATOM   1020  C4   DG A  32     -26.202  35.807 -26.950  6.00  0.00           C  
ATOM   1021  C5   DG A  32     -26.855  36.510 -25.950  0.00  0.00           C  
ATOM   1022  C6   DG A  32     -26.132  36.829 -24.740  3.00  0.00           C  
ATOM   1023  O6   DG A  32     -26.568  37.304 -23.690  8.00  0.00           O  
ATOM   1024  N7   DG A  32     -28.238  36.566 -26.200  2.00  0.00           N  
ATOM   1025  C8   DG A  32     -28.278  36.078 -27.440  9.00  0.00           C  
ATOM   1026  N9   DG A  32     -27.157  35.348 -27.840  2.00  0.00           N  
ATOM   1027  OP1  DG A  32     -29.426  35.473 -34.270  1.00  0.00           O  
ATOM   1028  OP2  DG A  32     -31.216  35.590 -32.530  1.00  0.00           O1-
ATOM   1029  H1   DG A  32     -24.297  36.587 -23.970  4.00  0.00           H  
ATOM   1030  H8   DG A  32     -29.162  36.041 -28.010  2.00  0.00           H  
ATOM   1031  H1'  DG A  32     -26.143  33.636 -28.790  4.00  0.00           H  
ATOM   1032  H2'  DG A  32     -28.908  34.096 -29.510  9.00  0.00           H  
ATOM   1033  H21  DG A  32     -22.446  36.251 -25.120  5.00  0.00           H  
ATOM   1034  H3'  DG A  32     -28.413  32.162 -30.900  9.00  0.00           H  
ATOM   1035  H22  DG A  32     -22.476  35.911 -26.930  7.00  0.00           H  
ATOM   1036  H4'  DG A  32     -25.969  33.486 -31.550  1.00  0.00           H  
ATOM   1037  H5'  DG A  32     -27.124  35.289 -32.560  1.00  0.00           H  
ATOM   1038 H2''  DG A  32     -28.385  32.748 -28.290  2.00  0.00           H  
ATOM   1039 H5''  DG A  32     -27.632  33.741 -33.170  1.00  0.00           H  
ATOM   1040  P    DG A  33     -26.880  30.121 -30.060  5.00  0.00           P  
ATOM   1041  C5'  DG A  33     -24.490  29.485 -28.940  2.00  0.00           C  
ATOM   1042  O5'  DG A  33     -25.960  29.559 -28.850  2.00  0.00           O  
ATOM   1043  C4'  DG A  33     -23.850  30.865 -28.920  0.00  0.00           C  
ATOM   1044  O4'  DG A  33     -24.284  31.377 -27.650  4.00  0.00           O  
ATOM   1045  C3'  DG A  33     -22.315  31.013 -28.850  3.00  0.00           C  
ATOM   1046  O3'  DG A  33     -21.606  29.834 -29.190  9.00  0.00           O  
ATOM   1047  C2'  DG A  33     -22.040  31.498 -27.390  9.00  0.00           C  
ATOM   1048  C1'  DG A  33     -23.325  32.272 -27.120  4.00  0.00           C  
ATOM   1049  N1   DG A  33     -26.869  33.519 -23.520  0.00  0.00           N  
ATOM   1050  C2   DG A  33     -27.023  32.856 -24.670  6.00  0.00           C  
ATOM   1051  N2   DG A  33     -28.253  32.591 -25.000  6.00  0.00           N  
ATOM   1052  N3   DG A  33     -26.040  32.637 -25.530  0.00  0.00           N  
ATOM   1053  C4   DG A  33     -24.770  32.882 -25.010  6.00  0.00           C  
ATOM   1054  C5   DG A  33     -24.462  33.444 -23.750  1.00  0.00           C  
ATOM   1055  C6   DG A  33     -25.608  33.770 -22.940  2.00  0.00           C  
ATOM   1056  O6   DG A  33     -25.615  34.229 -21.790  6.00  0.00           O  
ATOM   1057  N7   DG A  33     -23.055  33.543 -23.610  7.00  0.00           N  
ATOM   1058  C8   DG A  33     -22.558  33.006 -24.690  0.00  0.00           C  
ATOM   1059  N9   DG A  33     -23.522  32.699 -25.650  4.00  0.00           N  
ATOM   1060  OP1  DG A  33     -26.337  29.616 -31.310  2.00  0.00           O  
ATOM   1061  OP2  DG A  33     -28.252  29.726 -29.660  8.00  0.00           O1-
ATOM   1062  H1   DG A  33     -27.660  33.641 -22.980  4.00  0.00           H  
ATOM   1063  H8   DG A  33     -21.507  32.947 -24.840  2.00  0.00           H  
ATOM   1064  H1'  DG A  33     -23.416  33.132 -27.760  3.00  0.00           H  
ATOM   1065  H2'  DG A  33     -21.855  30.658 -26.710  0.00  0.00           H  
ATOM   1066  H21  DG A  33     -28.924  32.988 -24.370  7.00  0.00           H  
ATOM   1067  H3'  DG A  33     -22.098  31.819 -29.560  7.00  0.00           H  
ATOM   1068  H22  DG A  33     -28.506  32.079 -25.860  2.00  0.00           H  
ATOM   1069  H4'  DG A  33     -24.264  31.465 -29.730  0.00  0.00           H  
ATOM   1070  H5'  DG A  33     -24.263  28.999 -29.860  8.00  0.00           H  
ATOM   1071 H2''  DG A  33     -21.195  32.124 -27.460  5.00  0.00           H  
ATOM   1072 H5''  DG A  33     -24.022  28.916 -28.140  9.00  0.00           H  
ATOM   1073  P    DT A  34     -20.849  29.613 -30.560  8.00  0.00           P  
ATOM   1074  C5'  DT A  34     -20.613  26.963 -30.390  1.00  0.00           C  
ATOM   1075  O5'  DT A  34     -20.019  28.242 -30.370  4.00  0.00           O  
ATOM   1076  C4'  DT A  34     -20.388  26.267 -29.050  9.00  0.00           C  
ATOM   1077  O4'  DT A  34     -20.997  24.987 -29.010  4.00  0.00           O  
ATOM   1078  C3'  DT A  34     -18.873  25.972 -28.820  5.00  0.00           C  
ATOM   1079  O3'  DT A  34     -18.535  26.263 -27.430  1.00  0.00           O  
ATOM   1080  C2'  DT A  34     -18.780  24.555 -29.400  8.00  0.00           C  
ATOM   1081  C1'  DT A  34     -20.080  24.004 -28.810  4.00  0.00           C  
ATOM   1082  N1   DT A  34     -20.544  22.789 -29.530  4.00  0.00           N  
ATOM   1083  C2   DT A  34     -20.552  21.557 -28.890  6.00  0.00           C  
ATOM   1084  O2   DT A  34     -20.361  21.510 -27.670  3.00  0.00           O  
ATOM   1085  N3   DT A  34     -21.027  20.478 -29.600  6.00  0.00           N  
ATOM   1086  C4   DT A  34     -21.454  20.493 -30.890  3.00  0.00           C  
ATOM   1087  O4   DT A  34     -21.707  19.396 -31.400  3.00  0.00           O  
ATOM   1088  C5   DT A  34     -21.457  21.783 -31.440  1.00  0.00           C  
ATOM   1089  C6   DT A  34     -20.906  22.889 -30.830  4.00  0.00           C  
ATOM   1090  C7   DT A  34     -22.009  22.006 -32.780  5.00  0.00           C  
ATOM   1091  OP1  DT A  34     -19.811  30.669 -30.620  8.00  0.00           O  
ATOM   1092  OP2  DT A  34     -21.884  29.467 -31.560  5.00  0.00           O1-
ATOM   1093  H3   DT A  34     -21.332  19.715 -29.050  3.00  0.00           H  
ATOM   1094  H6   DT A  34     -21.045  23.920 -31.210  6.00  0.00           H  
ATOM   1095  H1'  DT A  34     -19.959  23.822 -27.760  7.00  0.00           H  
ATOM   1096  H2'  DT A  34     -18.929  24.440 -30.490  4.00  0.00           H  
ATOM   1097  H3'  DT A  34     -18.175  26.659 -29.380  9.00  0.00           H  
ATOM   1098  H4'  DT A  34     -20.666  26.994 -28.350  4.00  0.00           H  
ATOM   1099  H5'  DT A  34     -20.284  26.353 -31.220  9.00  0.00           H  
ATOM   1100  H71  DT A  34     -22.931  21.473 -32.990  6.00  0.00           H  
ATOM   1101  H72  DT A  34     -22.218  23.051 -32.910  2.00  0.00           H  
ATOM   1102  H73  DT A  34     -21.313  21.699 -33.550  7.00  0.00           H  
ATOM   1103 H2''  DT A  34     -17.854  24.079 -28.980  6.00  0.00           H  
ATOM   1104 H5''  DT A  34     -21.728  26.946 -30.400  2.00  0.00           H  
ATOM   1105  P    DT A  35     -17.059  26.516 -26.870  6.00  0.00           P  
ATOM   1106  C5'  DT A  35     -17.118  24.153 -26.050  5.00  0.00           C  
ATOM   1107  O5'  DT A  35     -16.440  25.087 -26.780  8.00  0.00           O  
ATOM   1108  C4'  DT A  35     -16.262  22.869 -26.070  5.00  0.00           C  
ATOM   1109  O4'  DT A  35     -16.216  22.442 -27.490  7.00  0.00           O  
ATOM   1110  C3'  DT A  35     -14.775  22.963 -25.730  4.00  0.00           C  
ATOM   1111  O3'  DT A  35     -14.491  21.678 -25.140  4.00  0.00           O  
ATOM   1112  C2'  DT A  35     -14.035  23.207 -27.040  7.00  0.00           C  
ATOM   1113  C1'  DT A  35     -14.886  22.408 -28.000  9.00  0.00           C  
ATOM   1114  N1   DT A  35     -14.895  22.906 -29.400  8.00  0.00           N  
ATOM   1115  C2   DT A  35     -14.307  22.077 -30.330  4.00  0.00           C  
ATOM   1116  O2   DT A  35     -14.023  20.917 -30.100  5.00  0.00           O  
ATOM   1117  N3   DT A  35     -14.175  22.539 -31.590  2.00  0.00           N  
ATOM   1118  C4   DT A  35     -14.526  23.750 -32.070  0.00  0.00           C  
ATOM   1119  O4   DT A  35     -14.278  24.021 -33.230  7.00  0.00           O  
ATOM   1120  C5   DT A  35     -15.118  24.638 -31.030  4.00  0.00           C  
ATOM   1121  C6   DT A  35     -15.308  24.195 -29.750  2.00  0.00           C  
ATOM   1122  C7   DT A  35     -15.534  26.074 -31.360  0.00  0.00           C  
ATOM   1123  OP1  DT A  35     -17.297  27.034 -25.480  3.00  0.00           O  
ATOM   1124  OP2  DT A  35     -16.320  27.296 -27.860  3.00  0.00           O1-
ATOM   1125  H3   DT A  35     -13.680  22.023 -32.290  3.00  0.00           H  
ATOM   1126  H6   DT A  35     -15.653  24.889 -29.020  6.00  0.00           H  
ATOM   1127  H1'  DT A  35     -14.697  21.306 -27.810  1.00  0.00           H  
ATOM   1128  H2'  DT A  35     -13.965  24.272 -27.360  4.00  0.00           H  
ATOM   1129  H3'  DT A  35     -14.549  23.845 -25.000  1.00  0.00           H  
ATOM   1130  H4'  DT A  35     -16.806  22.178 -25.420  6.00  0.00           H  
ATOM   1131  H5'  DT A  35     -18.146  24.035 -26.460  9.00  0.00           H  
ATOM   1132  H71  DT A  35     -14.844  26.567 -32.060  1.00  0.00           H  
ATOM   1133  H72  DT A  35     -16.443  25.853 -31.740  9.00  0.00           H  
ATOM   1134  H73  DT A  35     -15.594  26.653 -30.410  2.00  0.00           H  
ATOM   1135 H2''  DT A  35     -13.066  22.856 -26.830  2.00  0.00           H  
ATOM   1136 H5''  DT A  35     -17.210  24.453 -25.020  6.00  0.00           H  
ATOM   1137  P    DA A  36     -13.171  21.417 -24.260  2.00  0.00           P  
ATOM   1138  C5'  DA A  36     -12.764  19.104 -25.500  5.00  0.00           C  
ATOM   1139  O5'  DA A  36     -12.212  20.306 -24.980  9.00  0.00           O  
ATOM   1140  C4'  DA A  36     -11.694  18.449 -26.380  0.00  0.00           C  
ATOM   1141  O4'  DA A  36     -11.735  19.005 -27.660  0.00  0.00           O  
ATOM   1142  C3'  DA A  36     -10.221  18.547 -25.840  3.00  0.00           C  
ATOM   1143  O3'  DA A  36      -9.560  17.399 -26.310  4.00  0.00           O  
ATOM   1144  C2'  DA A  36      -9.788  19.795 -26.630  3.00  0.00           C  
ATOM   1145  C1'  DA A  36     -10.482  19.566 -27.990  7.00  0.00           C  
ATOM   1146  N1   DA A  36     -11.012  21.131 -32.840  6.00  0.00           N  
ATOM   1147  C2   DA A  36     -11.054  19.942 -32.260  7.00  0.00           C  
ATOM   1148  N3   DA A  36     -10.990  19.597 -30.980  6.00  0.00           N  
ATOM   1149  C4   DA A  36     -10.799  20.751 -30.250  8.00  0.00           C  
ATOM   1150  C5   DA A  36     -10.795  22.068 -30.640  7.00  0.00           C  
ATOM   1151  C6   DA A  36     -10.963  22.161 -32.010  0.00  0.00           C  
ATOM   1152  N6   DA A  36     -11.077  23.312 -32.520  1.00  0.00           N  
ATOM   1153  N7   DA A  36     -10.828  22.920 -29.530  0.00  0.00           N  
ATOM   1154  C8   DA A  36     -10.691  22.037 -28.580  0.00  0.00           C  
ATOM   1155  N9   DA A  36     -10.640  20.777 -28.890  1.00  0.00           N  
ATOM   1156  OP1  DA A  36     -13.743  20.643 -23.130  8.00  0.00           O  
ATOM   1157  OP2  DA A  36     -12.505  22.667 -23.920  3.00  0.00           O1-
ATOM   1158  H2   DA A  36     -11.241  19.079 -32.880  5.00  0.00           H  
ATOM   1159  H8   DA A  36     -10.745  22.384 -27.520  2.00  0.00           H  
ATOM   1160  H1'  DA A  36      -9.870  18.820 -28.400  1.00  0.00           H  
ATOM   1161  H2'  DA A  36     -10.124  20.792 -26.150  8.00  0.00           H  
ATOM   1162  H3'  DA A  36     -10.223  18.681 -24.780  1.00  0.00           H  
ATOM   1163  H4'  DA A  36     -12.058  17.461 -26.460  4.00  0.00           H  
ATOM   1164  H5'  DA A  36     -13.644  19.277 -26.060  3.00  0.00           H  
ATOM   1165  H61  DA A  36     -11.331  23.284 -33.520  4.00  0.00           H  
ATOM   1166  H62  DA A  36     -11.245  24.189 -31.960  7.00  0.00           H  
ATOM   1167 H2''  DA A  36      -8.731  19.698 -26.560  1.00  0.00           H  
ATOM   1168 H5''  DA A  36     -13.120  18.370 -24.780  0.00  0.00           H  
ATOM   1169  P    DG A  37      -8.102  17.051 -25.790  3.00  0.00           P  
ATOM   1170  C5'  DG A  37      -6.254  17.400 -27.650  7.00  0.00           C  
ATOM   1171  O5'  DG A  37      -7.115  17.949 -26.680  2.00  0.00           O  
ATOM   1172  C4'  DG A  37      -7.015  16.974 -28.880  3.00  0.00           C  
ATOM   1173  O4'  DG A  37      -7.789  18.102 -29.430  0.00  0.00           O  
ATOM   1174  C3'  DG A  37      -6.101  16.475 -29.940  9.00  0.00           C  
ATOM   1175  O3'  DG A  37      -6.845  15.417 -30.580  7.00  0.00           O  
ATOM   1176  C2'  DG A  37      -5.872  17.754 -30.790  9.00  0.00           C  
ATOM   1177  C1'  DG A  37      -7.377  18.160 -30.760  0.00  0.00           C  
ATOM   1178  N1   DG A  37      -8.000  21.340 -34.640  6.00  0.00           N  
ATOM   1179  C2   DG A  37      -7.905  19.955 -34.680  5.00  0.00           C  
ATOM   1180  N2   DG A  37      -8.056  19.359 -35.820  5.00  0.00           N  
ATOM   1181  N3   DG A  37      -7.789  19.171 -33.610  3.00  0.00           N  
ATOM   1182  C4   DG A  37      -7.704  19.972 -32.470  9.00  0.00           C  
ATOM   1183  C5   DG A  37      -7.714  21.347 -32.370  7.00  0.00           C  
ATOM   1184  C6   DG A  37      -7.891  22.138 -33.550  2.00  0.00           C  
ATOM   1185  O6   DG A  37      -8.074  23.295 -33.740  9.00  0.00           O  
ATOM   1186  N7   DG A  37      -7.541  21.789 -31.010  1.00  0.00           N  
ATOM   1187  C8   DG A  37      -7.615  20.637 -30.380  9.00  0.00           C  
ATOM   1188  N9   DG A  37      -7.449  19.571 -31.190  8.00  0.00           N  
ATOM   1189  OP1  DG A  37      -7.813  15.617 -26.000  9.00  0.00           O  
ATOM   1190  OP2  DG A  37      -8.041  17.502 -24.390  1.00  0.00           O1-
ATOM   1191  H1   DG A  37      -8.060  21.780 -35.530  6.00  0.00           H  
ATOM   1192  H8   DG A  37      -7.626  20.495 -29.280  6.00  0.00           H  
ATOM   1193  H1'  DG A  37      -8.039  17.645 -31.400  3.00  0.00           H  
ATOM   1194  H2'  DG A  37      -5.286  18.538 -30.270  8.00  0.00           H  
ATOM   1195  H21  DG A  37      -8.178  19.915 -36.670  7.00  0.00           H  
ATOM   1196  H3'  DG A  37      -5.124  16.051 -29.540  2.00  0.00           H  
ATOM   1197  H22  DG A  37      -7.797  18.366 -35.890  7.00  0.00           H  
ATOM   1198  H4'  DG A  37      -7.702  16.222 -28.620  0.00  0.00           H  
ATOM   1199  H5'  DG A  37      -5.781  16.519 -27.300  7.00  0.00           H  
ATOM   1200 H2''  DG A  37      -5.507  17.411 -31.690  8.00  0.00           H  
ATOM   1201 H5''  DG A  37      -5.533  18.126 -27.970  2.00  0.00           H  
ATOM   1202  P    DG A  38      -6.135  14.310 -31.340  7.00  0.00           P  
ATOM   1203  C5'  DG A  38      -5.874  15.262 -33.800  2.00  0.00           C  
ATOM   1204  O5'  DG A  38      -5.358  15.113 -32.450  7.00  0.00           O  
ATOM   1205  C4'  DG A  38      -4.924  16.205 -34.600  5.00  0.00           C  
ATOM   1206  O4'  DG A  38      -5.240  17.570 -34.310  6.00  0.00           O  
ATOM   1207  C3'  DG A  38      -3.396  16.016 -34.420  4.00  0.00           C  
ATOM   1208  O3'  DG A  38      -2.880  15.772 -35.690  6.00  0.00           O  
ATOM   1209  C2'  DG A  38      -2.994  17.396 -33.830  0.00  0.00           C  
ATOM   1210  C1'  DG A  38      -4.022  18.337 -34.490  4.00  0.00           C  
ATOM   1211  N1   DG A  38      -5.015  23.057 -35.740  2.00  0.00           N  
ATOM   1212  C2   DG A  38      -5.013  21.933 -36.460  4.00  0.00           C  
ATOM   1213  N2   DG A  38      -5.550  21.929 -37.630  4.00  0.00           N  
ATOM   1214  N3   DG A  38      -4.750  20.739 -35.990  8.00  0.00           N  
ATOM   1215  C4   DG A  38      -4.456  20.796 -34.670  2.00  0.00           C  
ATOM   1216  C5   DG A  38      -4.265  21.867 -33.860  2.00  0.00           C  
ATOM   1217  C6   DG A  38      -4.506  23.140 -34.420  7.00  0.00           C  
ATOM   1218  O6   DG A  38      -4.297  24.226 -33.920  6.00  0.00           O  
ATOM   1219  N7   DG A  38      -3.967  21.469 -32.550  6.00  0.00           N  
ATOM   1220  C8   DG A  38      -3.876  20.174 -32.640  7.00  0.00           C  
ATOM   1221  N9   DG A  38      -4.022  19.726 -33.910  2.00  0.00           N  
ATOM   1222  OP1  DG A  38      -7.173  13.456 -31.940  6.00  0.00           O  
ATOM   1223  OP2  DG A  38      -5.144  13.801 -30.360  1.00  0.00           O1-
ATOM   1224  H1   DG A  38      -5.214  23.911 -36.190  7.00  0.00           H  
ATOM   1225  H8   DG A  38      -3.941  19.590 -31.660  6.00  0.00           H  
ATOM   1226  H1'  DG A  38      -3.809  18.565 -35.520  1.00  0.00           H  
ATOM   1227  H2'  DG A  38      -3.028  17.361 -32.790  6.00  0.00           H  
ATOM   1228  H21  DG A  38      -5.943  22.814 -37.890  2.00  0.00           H  
ATOM   1229  H3'  DG A  38      -3.220  15.231 -33.650  4.00  0.00           H  
ATOM   1230  H22  DG A  38      -5.485  21.100 -38.230  9.00  0.00           H  
ATOM   1231  H4'  DG A  38      -5.225  16.041 -35.630  3.00  0.00           H  
ATOM   1232  H5'  DG A  38      -6.880  15.730 -33.640  4.00  0.00           H  
ATOM   1233 H2''  DG A  38      -1.885  17.618 -34.110  9.00  0.00           H  
ATOM   1234 H5''  DG A  38      -6.096  14.301 -34.280  0.00  0.00           H  
ATOM   1235  P    DG A  39      -2.423  14.349 -36.160  6.00  0.00           P  
ATOM   1236  C5'  DG A  39      -3.636  14.614 -38.590  7.00  0.00           C  
ATOM   1237  O5'  DG A  39      -2.405  14.588 -37.770  5.00  0.00           O  
ATOM   1238  C4'  DG A  39      -3.565  15.517 -39.780  4.00  0.00           C  
ATOM   1239  O4'  DG A  39      -3.706  16.856 -39.400  0.00  0.00           O  
ATOM   1240  C3'  DG A  39      -2.316  15.434 -40.630  2.00  0.00           C  
ATOM   1241  O3'  DG A  39      -2.678  15.740 -42.020  9.00  0.00           O  
ATOM   1242  C2'  DG A  39      -1.511  16.522 -40.000  0.00  0.00           C  
ATOM   1243  C1'  DG A  39      -2.555  17.619 -39.690  4.00  0.00           C  
ATOM   1244  N1   DG A  39      -2.311  22.526 -38.570  8.00  0.00           N  
ATOM   1245  C2   DG A  39      -2.510  21.909 -39.720  5.00  0.00           C  
ATOM   1246  N2   DG A  39      -2.848  22.642 -40.730  4.00  0.00           N  
ATOM   1247  N3   DG A  39      -2.740  20.592 -39.840  8.00  0.00           N  
ATOM   1248  C4   DG A  39      -2.333  19.911 -38.740  0.00  0.00           C  
ATOM   1249  C5   DG A  39      -1.863  20.424 -37.520  6.00  0.00           C  
ATOM   1250  C6   DG A  39      -1.928  21.841 -37.400  6.00  0.00           C  
ATOM   1251  O6   DG A  39      -1.405  22.447 -36.400  8.00  0.00           O  
ATOM   1252  N7   DG A  39      -1.499  19.380 -36.720  9.00  0.00           N  
ATOM   1253  C8   DG A  39      -1.668  18.356 -37.470  4.00  0.00           C  
ATOM   1254  N9   DG A  39      -2.247  18.567 -38.650  8.00  0.00           N  
ATOM   1255  OP1  DG A  39      -3.383  13.260 -35.850  2.00  0.00           O  
ATOM   1256  OP2  DG A  39      -1.090  14.156 -35.610  2.00  0.00           O1-
ATOM   1257  H1   DG A  39      -2.458  23.507 -38.520  3.00  0.00           H  
ATOM   1258  H8   DG A  39      -1.483  17.423 -37.050  3.00  0.00           H  
ATOM   1259  H1'  DG A  39      -2.737  18.256 -40.630  1.00  0.00           H  
ATOM   1260  H2'  DG A  39      -0.931  16.216 -39.160  1.00  0.00           H  
ATOM   1261  H21  DG A  39      -3.018  23.636 -40.600  7.00  0.00           H  
ATOM   1262  H3'  DG A  39      -1.735  14.466 -40.560  0.00  0.00           H  
ATOM   1263  H22  DG A  39      -3.184  22.145 -41.600  3.00  0.00           H  
ATOM   1264  H4'  DG A  39      -4.376  15.191 -40.380  8.00  0.00           H  
ATOM   1265  H5'  DG A  39      -4.456  15.067 -38.030  8.00  0.00           H  
ATOM   1266 H2''  DG A  39      -0.798  16.802 -40.770  5.00  0.00           H  
ATOM   1267 H5''  DG A  39      -3.925  13.608 -38.880  7.00  0.00           H  
ATOM   1268  P    DT A  40      -1.755  15.664 -43.230  4.00  0.00           P  
ATOM   1269  C5'  DT A  40      -2.305  18.103 -43.880  5.00  0.00           C  
ATOM   1270  O5'  DT A  40      -1.376  17.176 -43.380  4.00  0.00           O  
ATOM   1271  C4'  DT A  40      -1.749  19.462 -43.960  7.00  0.00           C  
ATOM   1272  O4'  DT A  40      -1.586  20.101 -42.620  7.00  0.00           O  
ATOM   1273  C3'  DT A  40      -0.365  19.549 -44.670  0.00  0.00           C  
ATOM   1274  O3'  DT A  40      -0.541  20.443 -45.780  0.00  0.00           O  
ATOM   1275  C2'  DT A  40       0.617  19.909 -43.530  5.00  0.00           C  
ATOM   1276  C1'  DT A  40      -0.247  20.662 -42.590  0.00  0.00           C  
ATOM   1277  N1   DT A  40       0.411  20.672 -41.230  4.00  0.00           N  
ATOM   1278  C2   DT A  40       0.729  21.872 -40.660  4.00  0.00           C  
ATOM   1279  O2   DT A  40       0.544  23.005 -41.140  9.00  0.00           O  
ATOM   1280  N3   DT A  40       1.308  21.878 -39.400  5.00  0.00           N  
ATOM   1281  C4   DT A  40       1.682  20.684 -38.760  7.00  0.00           C  
ATOM   1282  O4   DT A  40       2.405  20.776 -37.710  6.00  0.00           O  
ATOM   1283  C5   DT A  40       1.387  19.414 -39.480  4.00  0.00           C  
ATOM   1284  C6   DT A  40       0.717  19.457 -40.650  0.00  0.00           C  
ATOM   1285  C7   DT A  40       1.764  18.033 -38.890  8.00  0.00           C  
ATOM   1286  OP1  DT A  40      -2.528  15.300 -44.440  4.00  0.00           O  
ATOM   1287  OP2  DT A  40      -0.485  14.972 -42.820  7.00  0.00           O1-
ATOM   1288  H3   DT A  40       1.591  22.841 -39.110  3.00  0.00           H  
ATOM   1289  H6   DT A  40       0.392  18.536 -41.180  0.00  0.00           H  
ATOM   1290  H1'  DT A  40      -0.307  21.693 -42.880  7.00  0.00           H  
ATOM   1291  H2'  DT A  40       1.010  18.877 -43.180  1.00  0.00           H  
ATOM   1292  H3'  DT A  40      -0.008  18.566 -45.070  5.00  0.00           H  
ATOM   1293  H4'  DT A  40      -2.538  20.025 -44.530  4.00  0.00           H  
ATOM   1294  H5'  DT A  40      -3.202  18.129 -43.300  8.00  0.00           H  
ATOM   1295  H71  DT A  40       1.484  18.012 -37.850  4.00  0.00           H  
ATOM   1296  H72  DT A  40       1.382  17.135 -39.370  8.00  0.00           H  
ATOM   1297  H73  DT A  40       2.865  18.043 -39.020  6.00  0.00           H  
ATOM   1298 H2''  DT A  40       1.469  20.470 -44.010  4.00  0.00           H  
ATOM   1299 H5''  DT A  40      -2.578  17.847 -44.920  2.00  0.00           H  
ATOM   1300  P    DT A  41       0.682  20.724 -46.720  9.00  0.00           P  
ATOM   1301  C5'  DT A  41       0.569  23.131 -45.570  1.00  0.00           C  
ATOM   1302  O5'  DT A  41       1.296  22.030 -45.970  0.00  0.00           O  
ATOM   1303  C4'  DT A  41       1.276  24.472 -45.470  1.00  0.00           C  
ATOM   1304  O4'  DT A  41       1.777  24.621 -44.150  6.00  0.00           O  
ATOM   1305  C3'  DT A  41       2.344  24.689 -46.510  3.00  0.00           C  
ATOM   1306  O3'  DT A  41       2.509  26.060 -46.730  6.00  0.00           O  
ATOM   1307  C2'  DT A  41       3.609  24.181 -45.840  2.00  0.00           C  
ATOM   1308  C1'  DT A  41       3.245  24.551 -44.350  8.00  0.00           C  
ATOM   1309  N1   DT A  41       3.695  23.576 -43.330  9.00  0.00           N  
ATOM   1310  C2   DT A  41       4.053  24.065 -42.090  5.00  0.00           C  
ATOM   1311  O2   DT A  41       4.000  25.258 -41.830  9.00  0.00           O  
ATOM   1312  N3   DT A  41       4.490  23.216 -41.080  5.00  0.00           N  
ATOM   1313  C4   DT A  41       4.431  21.822 -41.150  0.00  0.00           C  
ATOM   1314  O4   DT A  41       4.520  21.151 -40.170  7.00  0.00           O  
ATOM   1315  C5   DT A  41       3.956  21.312 -42.450  1.00  0.00           C  
ATOM   1316  C6   DT A  41       3.678  22.200 -43.470  6.00  0.00           C  
ATOM   1317  C7   DT A  41       4.009  19.789 -42.690  3.00  0.00           C  
ATOM   1318  OP1  DT A  41       0.233  21.033 -48.100  0.00  0.00           O  
ATOM   1319  OP2  DT A  41       1.542  19.577 -46.540  5.00  0.00           O1-
ATOM   1320  H3   DT A  41       4.756  23.620 -40.230  0.00  0.00           H  
ATOM   1321  H6   DT A  41       3.410  21.703 -44.450  1.00  0.00           H  
ATOM   1322  H1'  DT A  41       3.716  25.542 -44.240  4.00  0.00           H  
ATOM   1323  H2'  DT A  41       3.864  23.136 -46.070  0.00  0.00           H  
ATOM   1324  H3'  DT A  41       2.099  24.202 -47.430  8.00  0.00           H  
ATOM   1325  H4'  DT A  41       0.494  25.214 -45.610  4.00  0.00           H  
ATOM   1326  H5'  DT A  41       0.196  22.880 -44.570  3.00  0.00           H  
ATOM   1327  H71  DT A  41       4.856  19.370 -42.220  0.00  0.00           H  
ATOM   1328  H72  DT A  41       3.025  19.448 -42.390  8.00  0.00           H  
ATOM   1329  H73  DT A  41       4.090  19.538 -43.730  9.00  0.00           H  
ATOM   1330 H2''  DT A  41       4.570  24.631 -46.180  8.00  0.00           H  
ATOM   1331 H5''  DT A  41      -0.324  23.188 -46.170  9.00  0.00           H  
ATOM   1332  P    DA A  42       3.343  26.580 -47.950  3.00  0.00           P  
ATOM   1333  C5'  DA A  42       4.885  28.366 -46.860  3.00  0.00           C  
ATOM   1334  O5'  DA A  42       4.766  27.108 -47.500  0.00  0.00           O  
ATOM   1335  C4'  DA A  42       6.239  28.391 -46.200  6.00  0.00           C  
ATOM   1336  O4'  DA A  42       6.377  27.466 -45.050  0.00  0.00           O  
ATOM   1337  C3'  DA A  42       7.473  28.240 -47.060  3.00  0.00           C  
ATOM   1338  O3'  DA A  42       8.494  29.089 -46.630  4.00  0.00           O  
ATOM   1339  C2'  DA A  42       7.768  26.779 -46.890  0.00  0.00           C  
ATOM   1340  C1'  DA A  42       7.579  26.724 -45.370  5.00  0.00           C  
ATOM   1341  N1   DA A  42       7.511  24.133 -40.880  6.00  0.00           N  
ATOM   1342  C2   DA A  42       7.543  25.421 -41.150  5.00  0.00           C  
ATOM   1343  N3   DA A  42       7.563  26.099 -42.310  1.00  0.00           N  
ATOM   1344  C4   DA A  42       7.509  25.220 -43.380  7.00  0.00           C  
ATOM   1345  C5   DA A  42       7.481  23.812 -43.330  9.00  0.00           C  
ATOM   1346  C6   DA A  42       7.536  23.369 -41.990  5.00  0.00           C  
ATOM   1347  N6   DA A  42       7.483  22.117 -41.580  3.00  0.00           N  
ATOM   1348  N7   DA A  42       7.342  23.205 -44.570  1.00  0.00           N  
ATOM   1349  C8   DA A  42       7.272  24.234 -45.340  6.00  0.00           C  
ATOM   1350  N9   DA A  42       7.443  25.447 -44.730  9.00  0.00           N  
ATOM   1351  OP1  DA A  42       2.529  27.677 -48.490  7.00  0.00           O  
ATOM   1352  OP2  DA A  42       3.602  25.420 -48.840  5.00  0.00           O1-
ATOM   1353  H2   DA A  42       7.591  26.156 -40.310  4.00  0.00           H  
ATOM   1354  H8   DA A  42       7.080  24.096 -46.430  9.00  0.00           H  
ATOM   1355  H1'  DA A  42       8.351  27.228 -44.920  9.00  0.00           H  
ATOM   1356  H2'  DA A  42       6.996  26.135 -47.320  0.00  0.00           H  
ATOM   1357  H3'  DA A  42       7.208  28.491 -48.110  2.00  0.00           H  
ATOM   1358  H4'  DA A  42       6.356  29.405 -45.770  3.00  0.00           H  
ATOM   1359  H5'  DA A  42       4.123  28.481 -46.000  5.00  0.00           H  
ATOM   1360  H61  DA A  42       7.476  21.949 -40.610  8.00  0.00           H  
ATOM   1361  H62  DA A  42       7.456  21.286 -42.230  0.00  0.00           H  
ATOM   1362 H2''  DA A  42       8.732  26.511 -47.240  2.00  0.00           H  
ATOM   1363 H5''  DA A  42       4.789  29.211 -47.520  2.00  0.00           H  
ATOM   1364  P    DG A  43       9.664  29.614 -47.680  8.00  0.00           P  
ATOM   1365  C5'  DG A  43      10.153  31.742 -46.240  4.00  0.00           C  
ATOM   1366  O5'  DG A  43      10.594  30.629 -46.970  9.00  0.00           O  
ATOM   1367  C4'  DG A  43      10.939  31.758 -44.890  2.00  0.00           C  
ATOM   1368  O4'  DG A  43      10.491  30.658 -44.170  5.00  0.00           O  
ATOM   1369  C3'  DG A  43      12.429  31.617 -45.080  0.00  0.00           C  
ATOM   1370  O3'  DG A  43      13.055  32.512 -44.110  0.00  0.00           O  
ATOM   1371  C2'  DG A  43      12.786  30.137 -44.640  9.00  0.00           C  
ATOM   1372  C1'  DG A  43      11.643  29.887 -43.680  5.00  0.00           C  
ATOM   1373  N1   DG A  43      11.339  25.322 -41.000  3.00  0.00           N  
ATOM   1374  C2   DG A  43      11.776  26.515 -40.640  5.00  0.00           C  
ATOM   1375  N2   DG A  43      12.364  26.429 -39.460  2.00  0.00           N  
ATOM   1376  N3   DG A  43      11.731  27.698 -41.330  7.00  0.00           N  
ATOM   1377  C4   DG A  43      11.254  27.510 -42.580  5.00  0.00           C  
ATOM   1378  C5   DG A  43      10.826  26.271 -43.090  6.00  0.00           C  
ATOM   1379  C6   DG A  43      10.816  25.102 -42.220  7.00  0.00           C  
ATOM   1380  O6   DG A  43      10.555  23.953 -42.540  9.00  0.00           O  
ATOM   1381  N7   DG A  43      10.644  26.465 -44.470  9.00  0.00           N  
ATOM   1382  C8   DG A  43      10.906  27.716 -44.680  3.00  0.00           C  
ATOM   1383  N9   DG A  43      11.245  28.481 -43.600  1.00  0.00           N  
ATOM   1384  OP1  DG A  43       8.949  30.413 -48.700  6.00  0.00           O  
ATOM   1385  OP2  DG A  43      10.452  28.383 -48.110  1.00  0.00           O1-
ATOM   1386  H1   DG A  43      11.526  24.468 -40.450  4.00  0.00           H  
ATOM   1387  H8   DG A  43      10.843  28.222 -45.700  0.00  0.00           H  
ATOM   1388  H1'  DG A  43      11.933  30.207 -42.680  3.00  0.00           H  
ATOM   1389  H2'  DG A  43      12.652  29.430 -45.490  7.00  0.00           H  
ATOM   1390  H21  DG A  43      12.440  25.551 -38.960  7.00  0.00           H  
ATOM   1391  H3'  DG A  43      12.690  31.938 -46.150  6.00  0.00           H  
ATOM   1392  H22  DG A  43      12.629  27.292 -38.970  8.00  0.00           H  
ATOM   1393  H4'  DG A  43      10.629  32.688 -44.310  2.00  0.00           H  
ATOM   1394  H5'  DG A  43       9.121  31.677 -46.060  5.00  0.00           H  
ATOM   1395 H2''  DG A  43      13.788  29.933 -44.220  4.00  0.00           H  
ATOM   1396 H5''  DG A  43      10.207  32.657 -46.870  6.00  0.00           H  
ATOM   1397  P    DG A  44      14.577  32.814 -44.150  8.00  0.00           P  
ATOM   1398  C5'  DG A  44      15.376  31.351 -42.200  2.00  0.00           C  
ATOM   1399  O5'  DG A  44      15.390  31.563 -43.540  8.00  0.00           O  
ATOM   1400  C4'  DG A  44      16.079  30.103 -41.680  3.00  0.00           C  
ATOM   1401  O4'  DG A  44      15.274  28.901 -41.840  9.00  0.00           O  
ATOM   1402  C3'  DG A  44      17.349  29.831 -42.510  7.00  0.00           C  
ATOM   1403  O3'  DG A  44      18.380  29.430 -41.590  9.00  0.00           O  
ATOM   1404  C2'  DG A  44      16.941  28.706 -43.420  6.00  0.00           C  
ATOM   1405  C1'  DG A  44      16.121  27.893 -42.450  9.00  0.00           C  
ATOM   1406  N1   DG A  44      14.264  23.190 -41.670  7.00  0.00           N  
ATOM   1407  C2   DG A  44      15.005  23.974 -40.910  4.00  0.00           C  
ATOM   1408  N2   DG A  44      15.502  23.520 -39.850  3.00  0.00           N  
ATOM   1409  N3   DG A  44      15.304  25.206 -41.080  2.00  0.00           N  
ATOM   1410  C4   DG A  44      14.975  25.618 -42.370  1.00  0.00           C  
ATOM   1411  C5   DG A  44      14.356  24.852 -43.340  0.00  0.00           C  
ATOM   1412  C6   DG A  44      13.907  23.610 -42.910  4.00  0.00           C  
ATOM   1413  O6   DG A  44      13.264  22.790 -43.530  7.00  0.00           O  
ATOM   1414  N7   DG A  44      14.253  25.544 -44.560  9.00  0.00           N  
ATOM   1415  C8   DG A  44      14.856  26.687 -44.320  3.00  0.00           C  
ATOM   1416  N9   DG A  44      15.296  26.807 -43.020  6.00  0.00           N  
ATOM   1417  OP1  DG A  44      14.753  33.920 -43.190  8.00  0.00           O  
ATOM   1418  OP2  DG A  44      14.909  32.981 -45.590  4.00  0.00           O1-
ATOM   1419  H1   DG A  44      13.960  22.238 -41.400  4.00  0.00           H  
ATOM   1420  H8   DG A  44      14.960  27.456 -45.050  9.00  0.00           H  
ATOM   1421  H1'  DG A  44      16.829  27.386 -41.750  8.00  0.00           H  
ATOM   1422  H2'  DG A  44      16.222  29.135 -44.160  2.00  0.00           H  
ATOM   1423  H21  DG A  44      15.410  22.486 -39.570  8.00  0.00           H  
ATOM   1424  H3'  DG A  44      17.663  30.717 -43.070  8.00  0.00           H  
ATOM   1425  H22  DG A  44      15.998  24.087 -39.280  0.00  0.00           H  
ATOM   1426  H4'  DG A  44      16.397  30.364 -40.660  6.00  0.00           H  
ATOM   1427  H5'  DG A  44      14.373  31.182 -41.910  3.00  0.00           H  
ATOM   1428 H2''  DG A  44      17.840  28.200 -43.810  4.00  0.00           H  
ATOM   1429 H5''  DG A  44      15.817  32.180 -41.630  8.00  0.00           H  
ATOM   1430  P   DG3 A  45      19.924  29.486 -41.980  9.00  0.00           P  
ATOM   1431  C5' DG3 A  45      20.601  27.927 -39.860  5.00  0.00           C  
ATOM   1432  O5' DG3 A  45      20.724  28.245 -41.300  9.00  0.00           O  
ATOM   1433  C4' DG3 A  45      20.645  26.500 -39.330  0.00  0.00           C  
ATOM   1434  O4' DG3 A  45      19.502  25.903 -39.930  8.00  0.00           O  
ATOM   1435  C3' DG3 A  45      21.875  25.676 -39.740  6.00  0.00           C  
ATOM   1436  O3' DG3 A  45      22.077  24.719 -38.710  1.00  0.00           O  
ATOM   1437  C2' DG3 A  45      21.360  25.131 -41.060  6.00  0.00           C  
ATOM   1438  C1' DG3 A  45      19.953  24.754 -40.550  0.00  0.00           C  
ATOM   1439  N1  DG3 A  45      17.626  20.708 -42.580  5.00  0.00           N  
ATOM   1440  C2  DG3 A  45      18.492  20.793 -41.600  6.00  0.00           C  
ATOM   1441  N2  DG3 A  45      18.802  19.624 -41.080  3.00  0.00           N  
ATOM   1442  N3  DG3 A  45      19.195  21.887 -41.260  5.00  0.00           N  
ATOM   1443  C4  DG3 A  45      18.803  22.994 -41.950  8.00  0.00           C  
ATOM   1444  C5  DG3 A  45      17.869  23.024 -42.980  8.00  0.00           C  
ATOM   1445  C6  DG3 A  45      17.292  21.802 -43.390  5.00  0.00           C  
ATOM   1446  O6  DG3 A  45      16.479  21.571 -44.300  3.00  0.00           O  
ATOM   1447  N7  DG3 A  45      17.727  24.365 -43.410  5.00  0.00           N  
ATOM   1448  C8  DG3 A  45      18.520  25.014 -42.650  8.00  0.00           C  
ATOM   1449  N9  DG3 A  45      19.115  24.295 -41.680  6.00  0.00           N  
ATOM   1450  OP1 DG3 A  45      20.481  30.684 -41.310  6.00  0.00           O  
ATOM   1451  OP2 DG3 A  45      20.029  29.511 -43.480  7.00  0.00           O  
ATOM   1452 HO3' DG3 A  45      23.068  24.484 -38.840  4.00  0.00           H  
ATOM   1453  H1  DG3 A  45      17.100  19.899 -42.750  4.00  0.00           H  
ATOM   1454  H8  DG3 A  45      18.638  26.043 -42.890  4.00  0.00           H  
ATOM   1455  H1' DG3 A  45      20.165  23.942 -39.870  9.00  0.00           H  
ATOM   1456  H2' DG3 A  45      21.273  25.981 -41.820  6.00  0.00           H  
ATOM   1457  H21 DG3 A  45      18.449  18.731 -41.420  7.00  0.00           H  
ATOM   1458  H3' DG3 A  45      22.688  26.379 -39.930  7.00  0.00           H  
ATOM   1459  H22 DG3 A  45      19.541  19.640 -40.420  3.00  0.00           H  
ATOM   1460  H4' DG3 A  45      20.669  26.494 -38.250  1.00  0.00           H  
ATOM   1461  H5' DG3 A  45      19.606  28.298 -39.470  4.00  0.00           H  
ATOM   1462 H2'' DG3 A  45      21.863  24.258 -41.460  6.00  0.00           H  
ATOM   1463 H5'' DG3 A  45      21.448  28.484 -39.330  9.00  0.00           H  
ATOM   1464  C5' DC5 A  46      13.750  11.997 -42.850  1.00  0.00           C  
ATOM   1465  O5' DC5 A  46      12.745  12.989 -42.880  0.00  0.00           O  
ATOM   1466  C4' DC5 A  46      15.032  12.495 -42.150  1.00  0.00           C  
ATOM   1467  O4' DC5 A  46      15.831  13.394 -42.970  5.00  0.00           O  
ATOM   1468  C3' DC5 A  46      14.845  13.187 -40.730  9.00  0.00           C  
ATOM   1469  O3' DC5 A  46      15.868  12.939 -39.780  1.00  0.00           O  
ATOM   1470  C2' DC5 A  46      14.981  14.612 -41.200  7.00  0.00           C  
ATOM   1471  C1' DC5 A  46      16.007  14.633 -42.340  2.00  0.00           C  
ATOM   1472  N1  DC5 A  46      15.794  15.767 -43.270  2.00  0.00           N  
ATOM   1473  C2  DC5 A  46      16.565  16.956 -43.230  5.00  0.00           C  
ATOM   1474  O2  DC5 A  46      17.653  16.993 -42.680  9.00  0.00           O  
ATOM   1475  N3  DC5 A  46      16.102  18.129 -43.760  0.00  0.00           N  
ATOM   1476  C4  DC5 A  46      15.146  18.077 -44.620  6.00  0.00           C  
ATOM   1477  N4  DC5 A  46      14.687  19.235 -45.060  0.00  0.00           N  
ATOM   1478  C5  DC5 A  46      14.358  16.925 -44.850  2.00  0.00           C  
ATOM   1479  C6  DC5 A  46      14.749  15.799 -44.150  4.00  0.00           C  
ATOM   1480 HO5' DC5 A  46      12.379  13.084 -42.010  0.00  0.00           H  
ATOM   1481  H5  DC5 A  46      13.608  16.887 -45.590  9.00  0.00           H  
ATOM   1482  H6  DC5 A  46      14.248  14.918 -44.270  2.00  0.00           H  
ATOM   1483  H1' DC5 A  46      17.010  14.722 -41.830  4.00  0.00           H  
ATOM   1484  H2' DC5 A  46      14.010  14.896 -41.630  0.00  0.00           H  
ATOM   1485  H3' DC5 A  46      13.831  13.007 -40.330  3.00  0.00           H  
ATOM   1486  H4' DC5 A  46      15.578  11.552 -41.960  9.00  0.00           H  
ATOM   1487  H41 DC5 A  46      15.152  20.078 -44.630  4.00  0.00           H  
ATOM   1488  H5' DC5 A  46      13.918  11.588 -43.850  0.00  0.00           H  
ATOM   1489  H42 DC5 A  46      13.824  19.226 -45.670  2.00  0.00           H  
ATOM   1490 H2'' DC5 A  46      15.320  15.188 -40.300  2.00  0.00           H  
ATOM   1491 H5'' DC5 A  46      13.470  11.181 -42.190  1.00  0.00           H  
ATOM   1492  P    DC A  47      15.512  12.960 -38.170  2.00  0.00           P  
ATOM   1493  C5'  DC A  47      17.029  15.120 -37.820  8.00  0.00           C  
ATOM   1494  O5'  DC A  47      15.740  14.472 -37.820  4.00  0.00           O  
ATOM   1495  C4'  DC A  47      16.815  16.613 -37.650  8.00  0.00           C  
ATOM   1496  O4'  DC A  47      16.351  17.202 -38.880  8.00  0.00           O  
ATOM   1497  C3'  DC A  47      15.833  16.906 -36.470  6.00  0.00           C  
ATOM   1498  O3'  DC A  47      16.355  17.881 -35.560  5.00  0.00           O  
ATOM   1499  C2'  DC A  47      14.688  17.485 -37.290  5.00  0.00           C  
ATOM   1500  C1'  DC A  47      15.391  18.117 -38.460  7.00  0.00           C  
ATOM   1501  N1   DC A  47      14.578  18.642 -39.670  8.00  0.00           N  
ATOM   1502  C2   DC A  47      14.657  19.978 -40.120  4.00  0.00           C  
ATOM   1503  O2   DC A  47      15.325  20.799 -39.480  6.00  0.00           O  
ATOM   1504  N3   DC A  47      13.931  20.391 -41.170  4.00  0.00           N  
ATOM   1505  C4   DC A  47      13.079  19.567 -41.730  7.00  0.00           C  
ATOM   1506  N4   DC A  47      12.465  20.017 -42.780  2.00  0.00           N  
ATOM   1507  C5   DC A  47      12.966  18.226 -41.310  0.00  0.00           C  
ATOM   1508  C6   DC A  47      13.691  17.779 -40.240  8.00  0.00           C  
ATOM   1509  OP1  DC A  47      16.539  12.085 -37.590  4.00  0.00           O  
ATOM   1510  OP2  DC A  47      14.082  12.614 -37.940  8.00  0.00           O1-
ATOM   1511  H5   DC A  47      12.242  17.586 -41.780  9.00  0.00           H  
ATOM   1512  H6   DC A  47      13.633  16.750 -39.900  0.00  0.00           H  
ATOM   1513  H1'  DC A  47      16.046  18.953 -38.140  5.00  0.00           H  
ATOM   1514  H2'  DC A  47      14.061  16.722 -37.590  3.00  0.00           H  
ATOM   1515  H3'  DC A  47      15.497  15.946 -36.040  5.00  0.00           H  
ATOM   1516  H4'  DC A  47      17.745  17.088 -37.470  1.00  0.00           H  
ATOM   1517  H41  DC A  47      12.541  21.044 -42.850  2.00  0.00           H  
ATOM   1518  H5'  DC A  47      17.455  14.922 -38.800  7.00  0.00           H  
ATOM   1519  H42  DC A  47      11.583  19.643 -43.110  4.00  0.00           H  
ATOM   1520 H2''  DC A  47      14.149  18.129 -36.610  0.00  0.00           H  
ATOM   1521 H5''  DC A  47      17.705  14.689 -36.990  1.00  0.00           H  
ATOM   1522  P    DC A  48      15.660  18.134 -34.230  2.00  0.00           P  
ATOM   1523  C5'  DC A  48      16.048  20.709 -34.060  7.00  0.00           C  
ATOM   1524  O5'  DC A  48      15.179  19.634 -34.210  0.00  0.00           O  
ATOM   1525  C4'  DC A  48      15.429  22.047 -34.340  6.00  0.00           C  
ATOM   1526  O4'  DC A  48      14.944  22.104 -35.690  4.00  0.00           O  
ATOM   1527  C3'  DC A  48      14.222  22.199 -33.400  7.00  0.00           C  
ATOM   1528  O3'  DC A  48      14.448  23.393 -32.800  6.00  0.00           O  
ATOM   1529  C2'  DC A  48      13.020  22.132 -34.330  0.00  0.00           C  
ATOM   1530  C1'  DC A  48      13.653  22.692 -35.640  9.00  0.00           C  
ATOM   1531  N1   DC A  48      12.902  22.412 -36.860  9.00  0.00           N  
ATOM   1532  C2   DC A  48      12.698  23.485 -37.760  7.00  0.00           C  
ATOM   1533  O2   DC A  48      13.145  24.617 -37.540  7.00  0.00           O  
ATOM   1534  N3   DC A  48      11.998  23.280 -38.880  4.00  0.00           N  
ATOM   1535  C4   DC A  48      11.634  22.091 -39.240  9.00  0.00           C  
ATOM   1536  N4   DC A  48      11.109  21.965 -40.370  4.00  0.00           N  
ATOM   1537  C5   DC A  48      11.892  20.951 -38.410  5.00  0.00           C  
ATOM   1538  C6   DC A  48      12.539  21.145 -37.220  8.00  0.00           C  
ATOM   1539  OP1  DC A  48      16.675  17.941 -33.160  4.00  0.00           O  
ATOM   1540  OP2  DC A  48      14.440  17.288 -34.100  2.00  0.00           O1-
ATOM   1541  H5   DC A  48      11.638  19.952 -38.650  1.00  0.00           H  
ATOM   1542  H6   DC A  48      12.889  20.264 -36.640  0.00  0.00           H  
ATOM   1543  H1'  DC A  48      13.759  23.761 -35.360  7.00  0.00           H  
ATOM   1544  H2'  DC A  48      12.776  21.093 -34.430  9.00  0.00           H  
ATOM   1545  H3'  DC A  48      14.223  21.430 -32.640  4.00  0.00           H  
ATOM   1546  H4'  DC A  48      16.115  22.918 -34.190  1.00  0.00           H  
ATOM   1547  H41  DC A  48      11.148  22.756 -40.990  7.00  0.00           H  
ATOM   1548  H5'  DC A  48      16.793  20.664 -34.880  7.00  0.00           H  
ATOM   1549  H42  DC A  48      10.844  21.041 -40.710  1.00  0.00           H  
ATOM   1550 H2''  DC A  48      12.198  22.749 -33.910  3.00  0.00           H  
ATOM   1551 H5''  DC A  48      16.565  20.573 -33.020  5.00  0.00           H  
ATOM   1552  P    DT A  49      13.481  23.944 -31.650  6.00  0.00           P  
ATOM   1553  C5'  DT A  49      12.908  25.862 -33.260  1.00  0.00           C  
ATOM   1554  O5'  DT A  49      12.423  24.771 -32.450  8.00  0.00           O  
ATOM   1555  C4'  DT A  49      11.881  26.461 -34.160  9.00  0.00           C  
ATOM   1556  O4'  DT A  49      11.597  25.519 -35.180  1.00  0.00           O  
ATOM   1557  C3'  DT A  49      10.555  26.681 -33.480  4.00  0.00           C  
ATOM   1558  O3'  DT A  49      10.515  28.016 -32.930  4.00  0.00           O  
ATOM   1559  C2'  DT A  49       9.572  26.573 -34.670  2.00  0.00           C  
ATOM   1560  C1'  DT A  49      10.430  25.919 -35.820  6.00  0.00           C  
ATOM   1561  N1   DT A  49       9.874  24.769 -36.420  0.00  0.00           N  
ATOM   1562  C2   DT A  49       9.306  24.930 -37.710  8.00  0.00           C  
ATOM   1563  O2   DT A  49       9.232  26.035 -38.310  6.00  0.00           O  
ATOM   1564  N3   DT A  49       8.887  23.762 -38.250  8.00  0.00           N  
ATOM   1565  C4   DT A  49       8.814  22.570 -37.650  2.00  0.00           C  
ATOM   1566  O4   DT A  49       8.358  21.618 -38.320  7.00  0.00           O  
ATOM   1567  C5   DT A  49       9.337  22.465 -36.270  8.00  0.00           C  
ATOM   1568  C6   DT A  49       9.831  23.603 -35.700  6.00  0.00           C  
ATOM   1569  C7   DT A  49       9.127  21.183 -35.450  4.00  0.00           C  
ATOM   1570  OP1  DT A  49      14.274  24.895 -30.830  6.00  0.00           O  
ATOM   1571  OP2  DT A  49      12.863  22.799 -30.970  0.00  0.00           O1-
ATOM   1572  H3   DT A  49       8.399  23.829 -39.180  0.00  0.00           H  
ATOM   1573  H6   DT A  49      10.241  23.619 -34.720  7.00  0.00           H  
ATOM   1574  H1'  DT A  49      10.827  26.578 -36.610  5.00  0.00           H  
ATOM   1575  H2'  DT A  49       8.655  26.018 -34.520  1.00  0.00           H  
ATOM   1576  H3'  DT A  49      10.471  26.033 -32.640  1.00  0.00           H  
ATOM   1577  H4'  DT A  49      12.337  27.351 -34.590  3.00  0.00           H  
ATOM   1578  H5'  DT A  49      13.665  25.546 -33.810  8.00  0.00           H  
ATOM   1579  H71  DT A  49       9.235  21.352 -34.360  6.00  0.00           H  
ATOM   1580  H72  DT A  49       8.069  20.844 -35.630  1.00  0.00           H  
ATOM   1581  H73  DT A  49       9.775  20.298 -35.730  5.00  0.00           H  
ATOM   1582 H2''  DT A  49       9.271  27.555 -34.970  4.00  0.00           H  
ATOM   1583 H5''  DT A  49      13.296  26.596 -32.640  1.00  0.00           H  
ATOM   1584  P    DA A  50       9.665  28.325 -31.650  4.00  0.00           P  
ATOM   1585  C5'  DA A  50       7.669  29.769 -32.900  7.00  0.00           C  
ATOM   1586  O5'  DA A  50       8.144  28.604 -32.180  3.00  0.00           O  
ATOM   1587  C4'  DA A  50       6.482  29.405 -33.850  7.00  0.00           C  
ATOM   1588  O4'  DA A  50       6.800  28.248 -34.630  6.00  0.00           O  
ATOM   1589  C3'  DA A  50       5.191  29.097 -33.080  8.00  0.00           C  
ATOM   1590  O3'  DA A  50       4.066  29.554 -33.770  2.00  0.00           O  
ATOM   1591  C2'  DA A  50       5.156  27.616 -33.160  0.00  0.00           C  
ATOM   1592  C1'  DA A  50       5.621  27.399 -34.580  8.00  0.00           C  
ATOM   1593  N1   DA A  50       5.398  23.972 -38.360  5.00  0.00           N  
ATOM   1594  C2   DA A  50       5.376  25.306 -38.410  2.00  0.00           C  
ATOM   1595  N3   DA A  50       5.538  26.164 -37.370  2.00  0.00           N  
ATOM   1596  C4   DA A  50       5.732  25.452 -36.160  1.00  0.00           C  
ATOM   1597  C5   DA A  50       5.671  24.099 -36.010  7.00  0.00           C  
ATOM   1598  C6   DA A  50       5.511  23.369 -37.240  3.00  0.00           C  
ATOM   1599  N6   DA A  50       5.383  22.079 -37.440  5.00  0.00           N  
ATOM   1600  N7   DA A  50       5.914  23.738 -34.670  7.00  0.00           N  
ATOM   1601  C8   DA A  50       6.020  24.898 -34.060  2.00  0.00           C  
ATOM   1602  N9   DA A  50       5.903  25.968 -34.910  0.00  0.00           N  
ATOM   1603  OP1  DA A  50      10.176  29.566 -31.100  3.00  0.00           O  
ATOM   1604  OP2  DA A  50       9.565  27.120 -30.780  7.00  0.00           O1-
ATOM   1605  H2   DA A  50       5.335  25.877 -39.330  0.00  0.00           H  
ATOM   1606  H8   DA A  50       6.303  25.036 -33.010  3.00  0.00           H  
ATOM   1607  H1'  DA A  50       4.870  27.757 -35.290  9.00  0.00           H  
ATOM   1608  H2'  DA A  50       5.841  27.223 -32.410  1.00  0.00           H  
ATOM   1609  H3'  DA A  50       5.245  29.305 -32.020  4.00  0.00           H  
ATOM   1610  H4'  DA A  50       6.259  30.227 -34.520  8.00  0.00           H  
ATOM   1611  H5'  DA A  50       8.513  30.253 -33.360  6.00  0.00           H  
ATOM   1612  H61  DA A  50       4.868  21.802 -38.300  4.00  0.00           H  
ATOM   1613  H62  DA A  50       5.351  21.441 -36.590  2.00  0.00           H  
ATOM   1614 H2''  DA A  50       4.216  27.081 -32.930  2.00  0.00           H  
ATOM   1615 H5''  DA A  50       7.359  30.480 -32.170  5.00  0.00           H  
ATOM   1616  P    DA A  51       3.397  30.906 -33.260  2.00  0.00           P  
ATOM   1617  C5'  DA A  51       3.485  31.771 -35.700  0.00  0.00           C  
ATOM   1618  O5'  DA A  51       2.648  31.375 -34.580  8.00  0.00           O  
ATOM   1619  C4'  DA A  51       2.931  31.608 -37.080  1.00  0.00           C  
ATOM   1620  O4'  DA A  51       3.014  30.242 -37.540  0.00  0.00           O  
ATOM   1621  C3'  DA A  51       1.479  32.026 -37.160  7.00  0.00           C  
ATOM   1622  O3'  DA A  51       1.287  32.536 -38.500  4.00  0.00           O  
ATOM   1623  C2'  DA A  51       0.823  30.692 -36.870  7.00  0.00           C  
ATOM   1624  C1'  DA A  51       1.745  29.702 -37.600  8.00  0.00           C  
ATOM   1625  N1   DA A  51       1.872  24.542 -38.350  9.00  0.00           N  
ATOM   1626  C2   DA A  51       1.834  25.571 -39.170  7.00  0.00           C  
ATOM   1627  N3   DA A  51       1.803  26.895 -38.980  3.00  0.00           N  
ATOM   1628  C4   DA A  51       1.782  27.134 -37.650  7.00  0.00           C  
ATOM   1629  C5   DA A  51       1.872  26.184 -36.580  8.00  0.00           C  
ATOM   1630  C6   DA A  51       1.848  24.864 -37.030  4.00  0.00           C  
ATOM   1631  N6   DA A  51       1.874  23.780 -36.220  3.00  0.00           N  
ATOM   1632  N7   DA A  51       1.800  26.856 -35.370  7.00  0.00           N  
ATOM   1633  C8   DA A  51       1.749  28.115 -35.620  5.00  0.00           C  
ATOM   1634  N9   DA A  51       1.774  28.361 -36.980  1.00  0.00           N  
ATOM   1635  OP1  DA A  51       4.516  31.848 -32.920  1.00  0.00           O  
ATOM   1636  OP2  DA A  51       2.430  30.556 -32.210  4.00  0.00           O1-
ATOM   1637  H2   DA A  51       1.959  25.278 -40.230  2.00  0.00           H  
ATOM   1638  H8   DA A  51       1.674  28.824 -34.810  1.00  0.00           H  
ATOM   1639  H1'  DA A  51       1.490  29.626 -38.660  2.00  0.00           H  
ATOM   1640  H2'  DA A  51       0.659  30.526 -35.840  3.00  0.00           H  
ATOM   1641  H3'  DA A  51       1.320  32.868 -36.490  4.00  0.00           H  
ATOM   1642  H4'  DA A  51       3.515  32.258 -37.720  0.00  0.00           H  
ATOM   1643  H5'  DA A  51       4.439  31.254 -35.600  3.00  0.00           H  
ATOM   1644  H61  DA A  51       1.823  22.908 -36.630  3.00  0.00           H  
ATOM   1645  H62  DA A  51       1.834  23.941 -35.180  4.00  0.00           H  
ATOM   1646 H2''  DA A  51      -0.193  30.741 -37.360  2.00  0.00           H  
ATOM   1647 H5''  DA A  51       3.734  32.788 -35.610  7.00  0.00           H  
ATOM   1648  P    DC A  52      -0.232  33.006 -39.060  0.00  0.00           P  
ATOM   1649  C5'  DC A  52      -0.332  31.301 -41.030  2.00  0.00           C  
ATOM   1650  O5'  DC A  52      -0.797  31.689 -39.740  9.00  0.00           O  
ATOM   1651  C4'  DC A  52      -1.095  30.122 -41.600  3.00  0.00           C  
ATOM   1652  O4'  DC A  52      -0.926  28.862 -40.880  9.00  0.00           O  
ATOM   1653  C3'  DC A  52      -2.577  30.487 -41.610  2.00  0.00           C  
ATOM   1654  O3'  DC A  52      -3.131  30.069 -42.910  9.00  0.00           O  
ATOM   1655  C2'  DC A  52      -3.090  29.618 -40.540  3.00  0.00           C  
ATOM   1656  C1'  DC A  52      -2.274  28.365 -40.590  3.00  0.00           C  
ATOM   1657  N1   DC A  52      -2.219  27.602 -39.280  6.00  0.00           N  
ATOM   1658  C2   DC A  52      -2.257  26.224 -39.360  2.00  0.00           C  
ATOM   1659  O2   DC A  52      -2.630  25.652 -40.370  9.00  0.00           O  
ATOM   1660  N3   DC A  52      -1.936  25.446 -38.310  7.00  0.00           N  
ATOM   1661  C4   DC A  52      -1.515  26.055 -37.190  1.00  0.00           C  
ATOM   1662  N4   DC A  52      -1.255  25.358 -36.160  3.00  0.00           N  
ATOM   1663  C5   DC A  52      -1.383  27.449 -37.080  3.00  0.00           C  
ATOM   1664  C6   DC A  52      -1.723  28.222 -38.150  9.00  0.00           C  
ATOM   1665  OP1  DC A  52      -0.074  33.988 -40.160  8.00  0.00           O  
ATOM   1666  OP2  DC A  52      -1.183  33.343 -37.980  5.00  0.00           O1-
ATOM   1667  H5   DC A  52      -0.952  27.795 -36.150  2.00  0.00           H  
ATOM   1668  H6   DC A  52      -1.547  29.315 -38.190  1.00  0.00           H  
ATOM   1669  H1'  DC A  52      -2.639  27.720 -41.390  6.00  0.00           H  
ATOM   1670  H2'  DC A  52      -3.023  30.104 -39.560  5.00  0.00           H  
ATOM   1671  H3'  DC A  52      -2.824  31.468 -41.350  7.00  0.00           H  
ATOM   1672  H4'  DC A  52      -0.779  29.947 -42.660  5.00  0.00           H  
ATOM   1673  H41  DC A  52      -1.313  24.360 -36.280  2.00  0.00           H  
ATOM   1674  H5'  DC A  52       0.668  30.936 -40.850  9.00  0.00           H  
ATOM   1675  H42  DC A  52      -0.981  25.779 -35.260  8.00  0.00           H  
ATOM   1676 H2''  DC A  52      -4.174  29.370 -40.720  2.00  0.00           H  
ATOM   1677 H5''  DC A  52      -0.417  32.171 -41.620  7.00  0.00           H  
ATOM   1678  P    DC A  53      -4.490  30.622 -43.460  6.00  0.00           P  
ATOM   1679  C5'  DC A  53      -5.467  28.203 -43.220  9.00  0.00           C  
ATOM   1680  O5'  DC A  53      -5.508  29.560 -42.830  5.00  0.00           O  
ATOM   1681  C4'  DC A  53      -6.089  27.175 -42.280  6.00  0.00           C  
ATOM   1682  O4'  DC A  53      -5.426  27.040 -41.030  5.00  0.00           O  
ATOM   1683  C3'  DC A  53      -7.545  27.686 -41.990  7.00  0.00           C  
ATOM   1684  O3'  DC A  53      -8.518  26.653 -41.970  3.00  0.00           O  
ATOM   1685  C2'  DC A  53      -7.342  28.038 -40.530  5.00  0.00           C  
ATOM   1686  C1'  DC A  53      -6.384  26.939 -40.070  9.00  0.00           C  
ATOM   1687  N1   DC A  53      -5.769  27.054 -38.680  4.00  0.00           N  
ATOM   1688  C2   DC A  53      -5.609  25.896 -37.910  5.00  0.00           C  
ATOM   1689  O2   DC A  53      -5.934  24.758 -38.390  4.00  0.00           O  
ATOM   1690  N3   DC A  53      -5.198  26.016 -36.640  1.00  0.00           N  
ATOM   1691  C4   DC A  53      -4.865  27.145 -36.150  4.00  0.00           C  
ATOM   1692  N4   DC A  53      -4.310  27.076 -35.000  9.00  0.00           N  
ATOM   1693  C5   DC A  53      -4.910  28.368 -36.900  4.00  0.00           C  
ATOM   1694  C6   DC A  53      -5.509  28.299 -38.110  1.00  0.00           C  
ATOM   1695  OP1  DC A  53      -4.501  30.343 -44.910  4.00  0.00           O  
ATOM   1696  OP2  DC A  53      -4.855  31.990 -42.960  3.00  0.00           O1-
ATOM   1697  H5   DC A  53      -4.598  29.249 -36.450  1.00  0.00           H  
ATOM   1698  H6   DC A  53      -5.607  29.147 -38.670  5.00  0.00           H  
ATOM   1699  H1'  DC A  53      -6.885  25.952 -40.140  7.00  0.00           H  
ATOM   1700  H2'  DC A  53      -6.888  29.061 -40.340  4.00  0.00           H  
ATOM   1701  H3'  DC A  53      -7.865  28.580 -42.570  9.00  0.00           H  
ATOM   1702  H4'  DC A  53      -6.185  26.196 -42.830  1.00  0.00           H  
ATOM   1703  H41  DC A  53      -4.156  26.123 -34.690  3.00  0.00           H  
ATOM   1704  H5'  DC A  53      -4.449  27.934 -43.410  5.00  0.00           H  
ATOM   1705  H42  DC A  53      -3.702  27.860 -34.720  7.00  0.00           H  
ATOM   1706 H2''  DC A  53      -8.249  28.077 -40.000  7.00  0.00           H  
ATOM   1707 H5''  DC A  53      -5.984  28.068 -44.130  3.00  0.00           H  
ATOM   1708  P    DC A  54      -9.418  26.424 -43.230  8.00  0.00           P  
ATOM   1709  C5'  DC A  54      -8.809  23.797 -43.640  3.00  0.00           C  
ATOM   1710  O5'  DC A  54      -9.737  24.802 -43.200  3.00  0.00           O  
ATOM   1711  C4'  DC A  54      -9.118  22.392 -43.030  3.00  0.00           C  
ATOM   1712  O4'  DC A  54      -8.541  22.088 -41.720  0.00  0.00           O  
ATOM   1713  C3'  DC A  54     -10.635  22.107 -42.960  5.00  0.00           C  
ATOM   1714  O3'  DC A  54     -10.832  20.774 -43.410  2.00  0.00           O  
ATOM   1715  C2'  DC A  54     -10.855  22.355 -41.470  6.00  0.00           C  
ATOM   1716  C1'  DC A  54      -9.545  21.963 -40.830  5.00  0.00           C  
ATOM   1717  N1   DC A  54      -9.234  22.744 -39.590  0.00  0.00           N  
ATOM   1718  C2   DC A  54      -9.152  22.066 -38.340  7.00  0.00           C  
ATOM   1719  O2   DC A  54      -9.196  20.855 -38.300  4.00  0.00           O  
ATOM   1720  N3   DC A  54      -8.910  22.798 -37.190  0.00  0.00           N  
ATOM   1721  C4   DC A  54      -8.782  24.093 -37.250  3.00  0.00           C  
ATOM   1722  N4   DC A  54      -8.816  24.722 -36.080  2.00  0.00           N  
ATOM   1723  C5   DC A  54      -8.909  24.788 -38.460  9.00  0.00           C  
ATOM   1724  C6   DC A  54      -9.129  24.093 -39.590  0.00  0.00           C  
ATOM   1725  OP1  DC A  54      -8.645  26.762 -44.480  5.00  0.00           O  
ATOM   1726  OP2  DC A  54     -10.668  27.143 -42.970  6.00  0.00           O1-
ATOM   1727  H5   DC A  54      -8.886  25.856 -38.490  9.00  0.00           H  
ATOM   1728  H6   DC A  54      -9.175  24.571 -40.510  6.00  0.00           H  
ATOM   1729  H1'  DC A  54      -9.573  20.963 -40.530  6.00  0.00           H  
ATOM   1730  H2'  DC A  54     -11.149  23.370 -41.400  2.00  0.00           H  
ATOM   1731  H3'  DC A  54     -11.179  22.816 -43.620  3.00  0.00           H  
ATOM   1732  H4'  DC A  54      -8.623  21.684 -43.730  6.00  0.00           H  
ATOM   1733  H41  DC A  54      -8.667  24.280 -35.160  1.00  0.00           H  
ATOM   1734  H5'  DC A  54      -7.803  24.063 -43.440  8.00  0.00           H  
ATOM   1735  H42  DC A  54      -8.850  25.759 -36.160  9.00  0.00           H  
ATOM   1736 H2''  DC A  54     -11.667  21.850 -40.990  5.00  0.00           H  
ATOM   1737 H5''  DC A  54      -8.870  23.668 -44.740  6.00  0.00           H  
ATOM   1738  P    DT A  55     -12.306  20.180 -43.510  1.00  0.00           P  
ATOM   1739  C5'  DT A  55     -11.854  18.446 -41.620  5.00  0.00           C  
ATOM   1740  O5'  DT A  55     -12.545  19.572 -42.070  8.00  0.00           O  
ATOM   1741  C4'  DT A  55     -12.230  17.931 -40.270  2.00  0.00           C  
ATOM   1742  O4'  DT A  55     -11.756  18.717 -39.190  7.00  0.00           O  
ATOM   1743  C3'  DT A  55     -13.812  17.824 -40.090  2.00  0.00           C  
ATOM   1744  O3'  DT A  55     -14.164  16.577 -39.490  3.00  0.00           O  
ATOM   1745  C2'  DT A  55     -14.114  19.093 -39.310  3.00  0.00           C  
ATOM   1746  C1'  DT A  55     -12.881  19.043 -38.330  4.00  0.00           C  
ATOM   1747  N1   DT A  55     -12.557  20.292 -37.590  5.00  0.00           N  
ATOM   1748  C2   DT A  55     -11.916  20.143 -36.350  3.00  0.00           C  
ATOM   1749  O2   DT A  55     -11.748  19.085 -35.780  9.00  0.00           O  
ATOM   1750  N3   DT A  55     -11.483  21.278 -35.710  2.00  0.00           N  
ATOM   1751  C4   DT A  55     -11.773  22.539 -36.130  6.00  0.00           C  
ATOM   1752  O4   DT A  55     -11.633  23.448 -35.350  3.00  0.00           O  
ATOM   1753  C5   DT A  55     -12.352  22.675 -37.460  1.00  0.00           C  
ATOM   1754  C6   DT A  55     -12.788  21.553 -38.130  7.00  0.00           C  
ATOM   1755  C7   DT A  55     -12.787  24.045 -37.970  5.00  0.00           C  
ATOM   1756  OP1  DT A  55     -12.198  19.052 -44.460  8.00  0.00           O  
ATOM   1757  OP2  DT A  55     -13.266  21.301 -43.800  4.00  0.00           O1-
ATOM   1758  H3   DT A  55     -11.165  21.191 -34.790  5.00  0.00           H  
ATOM   1759  H6   DT A  55     -13.376  21.717 -39.050  5.00  0.00           H  
ATOM   1760  H1'  DT A  55     -13.065  18.240 -37.590  2.00  0.00           H  
ATOM   1761  H2'  DT A  55     -13.924  19.972 -39.940  0.00  0.00           H  
ATOM   1762  H3'  DT A  55     -14.260  17.928 -41.060  0.00  0.00           H  
ATOM   1763  H4'  DT A  55     -11.918  16.896 -40.120  1.00  0.00           H  
ATOM   1764  H5'  DT A  55     -10.773  18.757 -41.490  6.00  0.00           H  
ATOM   1765  H71  DT A  55     -13.509  24.384 -37.180  2.00  0.00           H  
ATOM   1766  H72  DT A  55     -11.973  24.748 -38.220  2.00  0.00           H  
ATOM   1767  H73  DT A  55     -13.382  23.875 -38.880  7.00  0.00           H  
ATOM   1768 H2''  DT A  55     -15.103  19.174 -38.850  8.00  0.00           H  
ATOM   1769 H5''  DT A  55     -12.045  17.619 -42.280  5.00  0.00           H  
ATOM   1770  P    DA A  56     -15.713  16.059 -39.720  2.00  0.00           P  
ATOM   1771  C5'  DA A  56     -15.790  14.357 -37.880  9.00  0.00           C  
ATOM   1772  O5'  DA A  56     -16.087  15.625 -38.320  8.00  0.00           O  
ATOM   1773  C4'  DA A  56     -15.967  14.202 -36.310  3.00  0.00           C  
ATOM   1774  O4'  DA A  56     -15.390  15.378 -35.750  0.00  0.00           O  
ATOM   1775  C3'  DA A  56     -17.433  14.174 -35.880  1.00  0.00           C  
ATOM   1776  O3'  DA A  56     -17.436  13.579 -34.600  9.00  0.00           O  
ATOM   1777  C2'  DA A  56     -17.812  15.611 -35.840  2.00  0.00           C  
ATOM   1778  C1'  DA A  56     -16.496  16.151 -35.170  6.00  0.00           C  
ATOM   1779  N1   DA A  56     -14.349  20.531 -33.540  9.00  0.00           N  
ATOM   1780  C2   DA A  56     -14.421  19.347 -33.000  4.00  0.00           C  
ATOM   1781  N3   DA A  56     -14.956  18.247 -33.500  7.00  0.00           N  
ATOM   1782  C4   DA A  56     -15.556  18.471 -34.730  2.00  0.00           C  
ATOM   1783  C5   DA A  56     -15.576  19.621 -35.420  9.00  0.00           C  
ATOM   1784  C6   DA A  56     -14.933  20.662 -34.790  0.00  0.00           C  
ATOM   1785  N6   DA A  56     -14.812  21.879 -35.270  0.00  0.00           N  
ATOM   1786  N7   DA A  56     -16.268  19.559 -36.650  4.00  0.00           N  
ATOM   1787  C8   DA A  56     -16.677  18.284 -36.660  0.00  0.00           C  
ATOM   1788  N9   DA A  56     -16.183  17.549 -35.560  5.00  0.00           N  
ATOM   1789  OP1  DA A  56     -15.660  14.884 -40.580  4.00  0.00           O  
ATOM   1790  OP2  DA A  56     -16.619  17.197 -40.030  4.00  0.00           O1-
ATOM   1791  H2   DA A  56     -13.847  19.198 -32.090  0.00  0.00           H  
ATOM   1792  H8   DA A  56     -17.310  17.905 -37.450  1.00  0.00           H  
ATOM   1793  H1'  DA A  56     -16.484  15.976 -34.040  6.00  0.00           H  
ATOM   1794  H2'  DA A  56     -17.912  15.873 -36.860  4.00  0.00           H  
ATOM   1795  H3'  DA A  56     -18.018  13.637 -36.580  5.00  0.00           H  
ATOM   1796  H4'  DA A  56     -15.576  13.234 -36.080  4.00  0.00           H  
ATOM   1797  H5'  DA A  56     -14.743  14.078 -38.150  0.00  0.00           H  
ATOM   1798  H61  DA A  56     -14.359  22.577 -34.700  1.00  0.00           H  
ATOM   1799  H62  DA A  56     -15.254  22.142 -36.170  8.00  0.00           H  
ATOM   1800 H2''  DA A  56     -18.733  15.777 -35.270  7.00  0.00           H  
ATOM   1801 H5''  DA A  56     -16.492  13.701 -38.320  6.00  0.00           H  
ATOM   1802  P    DA A  57     -18.719  13.500 -33.590  8.00  0.00           P  
ATOM   1803  C5'  DA A  57     -17.583  14.470 -31.430  2.00  0.00           C  
ATOM   1804  O5'  DA A  57     -18.472  14.645 -32.540  8.00  0.00           O  
ATOM   1805  C4'  DA A  57     -17.562  15.742 -30.510  5.00  0.00           C  
ATOM   1806  O4'  DA A  57     -17.205  16.910 -31.240  9.00  0.00           O  
ATOM   1807  C3'  DA A  57     -18.848  15.918 -29.790  8.00  0.00           C  
ATOM   1808  O3'  DA A  57     -18.510  16.340 -28.510  5.00  0.00           O  
ATOM   1809  C2'  DA A  57     -19.478  17.000 -30.650  8.00  0.00           C  
ATOM   1810  C1'  DA A  57     -18.256  17.809 -31.020  6.00  0.00           C  
ATOM   1811  N1   DA A  57     -17.772  22.314 -33.480  7.00  0.00           N  
ATOM   1812  C2   DA A  57     -17.684  22.015 -32.210  4.00  0.00           C  
ATOM   1813  N3   DA A  57     -17.838  20.834 -31.680  6.00  0.00           N  
ATOM   1814  C4   DA A  57     -18.211  19.866 -32.550  7.00  0.00           C  
ATOM   1815  C5   DA A  57     -18.480  20.073 -33.880  1.00  0.00           C  
ATOM   1816  C6   DA A  57     -18.198  21.377 -34.340  9.00  0.00           C  
ATOM   1817  N6   DA A  57     -18.374  21.825 -35.590  8.00  0.00           N  
ATOM   1818  N7   DA A  57     -18.792  18.858 -34.510  5.00  0.00           N  
ATOM   1819  C8   DA A  57     -18.745  18.026 -33.540  1.00  0.00           C  
ATOM   1820  N9   DA A  57     -18.369  18.544 -32.300  2.00  0.00           N  
ATOM   1821  OP1  DA A  57     -18.610  12.223 -32.910  8.00  0.00           O  
ATOM   1822  OP2  DA A  57     -19.967  13.705 -34.280  5.00  0.00           O1-
ATOM   1823  H2   DA A  57     -17.392  22.848 -31.600  0.00  0.00           H  
ATOM   1824  H8   DA A  57     -18.903  16.964 -33.680  6.00  0.00           H  
ATOM   1825  H1'  DA A  57     -17.937  18.517 -30.200  4.00  0.00           H  
ATOM   1826  H2'  DA A  57     -20.054  16.599 -31.490  6.00  0.00           H  
ATOM   1827  H3'  DA A  57     -19.462  15.044 -29.810  3.00  0.00           H  
ATOM   1828  H4'  DA A  57     -16.802  15.601 -29.740  7.00  0.00           H  
ATOM   1829  H5'  DA A  57     -16.570  14.345 -31.750  8.00  0.00           H  
ATOM   1830  H61  DA A  57     -17.861  22.651 -35.850  8.00  0.00           H  
ATOM   1831  H62  DA A  57     -18.832  21.193 -36.240  0.00  0.00           H  
ATOM   1832 H2''  DA A  57     -20.164  17.574 -30.020  8.00  0.00           H  
ATOM   1833 H5''  DA A  57     -17.916  13.744 -30.780  0.00  0.00           H  
ATOM   1834  P   DCP A  58     -19.344  15.925 -27.200  1.00  0.00           P  
ATOM   1835  C5' DCP A  58     -20.732  18.187 -26.670  6.00  0.00           C  
ATOM   1836  O5' DCP A  58     -20.644  16.886 -27.200  7.00  0.00           O  
ATOM   1837  C4' DCP A  58     -22.201  18.780 -26.880  9.00  0.00           C  
ATOM   1838  O4' DCP A  58     -22.574  18.743 -28.240  2.00  0.00           O  
ATOM   1839  C3' DCP A  58     -23.191  17.900 -26.030  4.00  0.00           C  
ATOM   1840  O3' DCP A  58     -24.239  18.803 -25.580  1.00  0.00           O  
ATOM   1841  C2' DCP A  58     -23.845  17.111 -27.180  5.00  0.00           C  
ATOM   1842  C1' DCP A  58     -23.752  17.978 -28.410  4.00  0.00           C  
ATOM   1843  N1  DCP A  58     -23.783  17.149 -29.630  1.00  0.00           N  
ATOM   1844  C2  DCP A  58     -24.997  16.990 -30.290  8.00  0.00           C  
ATOM   1845  O2  DCP A  58     -26.001  17.557 -29.840  1.00  0.00           O  
ATOM   1846  N3  DCP A  58     -25.189  16.102 -31.340  9.00  0.00           N  
ATOM   1847  C4  DCP A  58     -24.145  15.392 -31.760  7.00  0.00           C  
ATOM   1848  N4  DCP A  58     -24.340  14.598 -32.770  1.00  0.00           N  
ATOM   1849  C5  DCP A  58     -22.828  15.432 -31.050  7.00  0.00           C  
ATOM   1850  C6  DCP A  58     -22.764  16.356 -30.020  4.00  0.00           C  
ATOM   1851  OP1 DCP A  58     -18.592  16.320 -26.030  3.00  0.00           O  
ATOM   1852  OP2 DCP A  58     -19.837  14.529 -27.360  9.00  0.00           O  
ATOM   1853  H3  DCP A  58     -26.088  16.088 -31.840  1.00  0.00           H  
ATOM   1854  H5  DCP A  58     -21.963  14.852 -31.270  8.00  0.00           H  
ATOM   1855  H6  DCP A  58     -21.930  16.429 -29.360  5.00  0.00           H  
ATOM   1856  H1' DCP A  58     -24.587  18.605 -28.390  0.00  0.00           H  
ATOM   1857  H2' DCP A  58     -23.364  16.146 -27.340  6.00  0.00           H  
ATOM   1858  H3' DCP A  58     -22.672  17.261 -25.360  4.00  0.00           H  
ATOM   1859  H4' DCP A  58     -22.289  19.807 -26.600  9.00  0.00           H  
ATOM   1860  H41 DCP A  58     -25.234  14.335 -33.120  3.00  0.00           H  
ATOM   1861  H5' DCP A  58     -20.066  18.762 -27.270  4.00  0.00           H  
ATOM   1862  H42 DCP A  58     -23.507  14.009 -33.130  8.00  0.00           H  
ATOM   1863 H2'' DCP A  58     -24.861  16.912 -26.890  1.00  0.00           H  
ATOM   1864 H5'' DCP A  58     -20.527  18.237 -25.580  4.00  0.00           H  
ATOM   1865  P   DCP A  59     -24.364  19.432 -24.130  8.00  0.00           P  
ATOM   1866  C5' DCP A  59     -24.417  17.072 -22.820  7.00  0.00           C  
ATOM   1867  O5' DCP A  59     -25.082  18.251 -23.330  1.00  0.00           O  
ATOM   1868  C4' DCP A  59     -25.407  15.861 -22.750  6.00  0.00           C  
ATOM   1869  O4' DCP A  59     -25.357  15.178 -23.980  5.00  0.00           O  
ATOM   1870  C3' DCP A  59     -25.079  14.724 -21.700  2.00  0.00           C  
ATOM   1871  O3' DCP A  59     -25.659  14.951 -20.450  0.00  0.00           O  
ATOM   1872  C2' DCP A  59     -25.702  13.516 -22.340  1.00  0.00           C  
ATOM   1873  C1' DCP A  59     -26.142  14.040 -23.710  5.00  0.00           C  
ATOM   1874  N1  DCP A  59     -26.008  13.049 -24.820  3.00  0.00           N  
ATOM   1875  C2  DCP A  59     -27.127  12.607 -25.480  6.00  0.00           C  
ATOM   1876  O2  DCP A  59     -28.254  13.006 -25.250  9.00  0.00           O  
ATOM   1877  N3  DCP A  59     -26.920  11.618 -26.460  8.00  0.00           N  
ATOM   1878  C4  DCP A  59     -25.736  11.155 -26.730  2.00  0.00           C  
ATOM   1879  N4  DCP A  59     -25.635  10.372 -27.710  2.00  0.00           N  
ATOM   1880  C5  DCP A  59     -24.523  11.616 -26.070  6.00  0.00           C  
ATOM   1881  C6  DCP A  59     -24.738  12.584 -25.110  7.00  0.00           C  
ATOM   1882  OP1 DCP A  59     -25.319  20.596 -24.270  2.00  0.00           O  
ATOM   1883  OP2 DCP A  59     -23.031  19.571 -23.520  1.00  0.00           O  
ATOM   1884  H3  DCP A  59     -27.786  11.389 -27.010  9.00  0.00           H  
ATOM   1885  H5  DCP A  59     -23.520  11.284 -26.370  7.00  0.00           H  
ATOM   1886  H6  DCP A  59     -23.924  13.046 -24.530  2.00  0.00           H  
ATOM   1887  H1' DCP A  59     -27.175  14.276 -23.580  9.00  0.00           H  
ATOM   1888  H2' DCP A  59     -24.956  12.760 -22.400  5.00  0.00           H  
ATOM   1889  H3' DCP A  59     -23.980  14.605 -21.660  3.00  0.00           H  
ATOM   1890  H4' DCP A  59     -26.359  16.261 -22.530  2.00  0.00           H  
ATOM   1891  H41 DCP A  59     -26.442  10.201 -28.280  5.00  0.00           H  
ATOM   1892  H5' DCP A  59     -23.846  17.368 -21.880  2.00  0.00           H  
ATOM   1893  H42 DCP A  59     -24.833   9.805 -27.960  4.00  0.00           H  
ATOM   1894 H2'' DCP A  59     -26.650  13.135 -21.780  1.00  0.00           H  
ATOM   1895 H5'' DCP A  59     -23.657  16.725 -23.550  2.00  0.00           H  
ATOM   1896  P   DCP A  60     -25.479  14.010 -19.230  2.00  0.00           P  
ATOM   1897  C5' DCP A  60     -27.974  13.041 -19.410  6.00  0.00           C  
ATOM   1898  O5' DCP A  60     -26.544  12.825 -19.370  2.00  0.00           O  
ATOM   1899  C4' DCP A  60     -28.726  11.674 -19.250  6.00  0.00           C  
ATOM   1900  O4' DCP A  60     -28.559  10.803 -20.390  6.00  0.00           O  
ATOM   1901  C3' DCP A  60     -28.322  10.793 -18.050  9.00  0.00           C  
ATOM   1902  O3' DCP A  60     -29.126  11.165 -16.950  3.00  0.00           O  
ATOM   1903  C2' DCP A  60     -28.568   9.370 -18.550  9.00  0.00           C  
ATOM   1904  C1' DCP A  60     -28.994   9.551 -19.990  6.00  0.00           C  
ATOM   1905  N1  DCP A  60     -28.470   8.492 -20.790  3.00  0.00           N  
ATOM   1906  C2  DCP A  60     -29.463   7.867 -21.600  0.00  0.00           C  
ATOM   1907  O2  DCP A  60     -30.629   8.125 -21.660  2.00  0.00           O  
ATOM   1908  N3  DCP A  60     -29.050   6.898 -22.430  6.00  0.00           N  
ATOM   1909  C4  DCP A  60     -27.776   6.530 -22.530  5.00  0.00           C  
ATOM   1910  N4  DCP A  60     -27.494   5.662 -23.450  1.00  0.00           N  
ATOM   1911  C5  DCP A  60     -26.763   7.023 -21.660  7.00  0.00           C  
ATOM   1912  C6  DCP A  60     -27.133   8.037 -20.790  6.00  0.00           C  
ATOM   1913  OP1 DCP A  60     -25.788  14.786 -18.050  0.00  0.00           O  
ATOM   1914  OP2 DCP A  60     -24.123  13.335 -19.370  7.00  0.00           O  
ATOM   1915  H3  DCP A  60     -29.624   6.483 -23.100  3.00  0.00           H  
ATOM   1916  H5  DCP A  60     -25.749   6.718 -21.690  1.00  0.00           H  
ATOM   1917  H6  DCP A  60     -26.399   8.513 -20.180  5.00  0.00           H  
ATOM   1918  H1' DCP A  60     -30.113   9.611 -19.970  2.00  0.00           H  
ATOM   1919  H2' DCP A  60     -27.592   9.040 -18.410  4.00  0.00           H  
ATOM   1920  H3' DCP A  60     -27.252  10.973 -17.850  1.00  0.00           H  
ATOM   1921  H4' DCP A  60     -29.814  11.845 -19.060  5.00  0.00           H  
ATOM   1922  H41 DCP A  60     -28.192   5.438 -24.160  3.00  0.00           H  
ATOM   1923  H5' DCP A  60     -28.341  13.616 -20.260  5.00  0.00           H  
ATOM   1924  H42 DCP A  60     -26.507   5.294 -23.520  1.00  0.00           H  
ATOM   1925 H2'' DCP A  60     -29.358   8.870 -17.930  5.00  0.00           H  
ATOM   1926 H5'' DCP A  60     -28.210  13.630 -18.520  7.00  0.00           H  
ATOM   1927  P    DT A  61     -28.688  10.776 -15.440  8.00  0.00           P  
ATOM   1928  C5'  DT A  61     -29.673   8.352 -14.920  0.00  0.00           C  
ATOM   1929  O5'  DT A  61     -28.685   9.158 -15.400  8.00  0.00           O  
ATOM   1930  C4'  DT A  61     -29.421   6.830 -15.000  7.00  0.00           C  
ATOM   1931  O4'  DT A  61     -30.252   6.136 -14.100  8.00  0.00           O  
ATOM   1932  C3'  DT A  61     -29.595   6.249 -16.410  7.00  0.00           C  
ATOM   1933  O3'  DT A  61     -28.369   5.414 -16.560  8.00  0.00           O  
ATOM   1934  C2'  DT A  61     -30.816   5.354 -16.140  7.00  0.00           C  
ATOM   1935  C1'  DT A  61     -30.656   4.884 -14.720  9.00  0.00           C  
ATOM   1936  N1   DT A  61     -31.846   4.256 -14.110  2.00  0.00           N  
ATOM   1937  C2   DT A  61     -31.661   3.055 -13.450  4.00  0.00           C  
ATOM   1938  O2   DT A  61     -30.555   2.523 -13.190  5.00  0.00           O  
ATOM   1939  N3   DT A  61     -32.751   2.625 -12.740  3.00  0.00           N  
ATOM   1940  C4   DT A  61     -34.002   3.122 -12.780  2.00  0.00           C  
ATOM   1941  O4   DT A  61     -34.845   2.678 -12.040  5.00  0.00           O  
ATOM   1942  C5   DT A  61     -34.171   4.323 -13.570  9.00  0.00           C  
ATOM   1943  C6   DT A  61     -33.068   4.857 -14.160  2.00  0.00           C  
ATOM   1944  C7   DT A  61     -35.472   5.138 -13.540  4.00  0.00           C  
ATOM   1945  OP1  DT A  61     -29.776  11.211 -14.510  9.00  0.00           O  
ATOM   1946  OP2  DT A  61     -27.357  11.203 -15.190  6.00  0.00           O1-
ATOM   1947  H3   DT A  61     -32.565   1.911 -12.070  9.00  0.00           H  
ATOM   1948  H6   DT A  61     -33.193   5.926 -14.540  5.00  0.00           H  
ATOM   1949  H1'  DT A  61     -29.830   4.160 -14.670  6.00  0.00           H  
ATOM   1950  H2'  DT A  61     -31.692   5.996 -16.290  1.00  0.00           H  
ATOM   1951  H3'  DT A  61     -29.670   7.007 -17.220  3.00  0.00           H  
ATOM   1952  H4'  DT A  61     -28.369   6.706 -14.680  5.00  0.00           H  
ATOM   1953  H5'  DT A  61     -30.603   8.591 -15.400  5.00  0.00           H  
ATOM   1954  H71  DT A  61     -36.290   4.508 -13.910  0.00  0.00           H  
ATOM   1955  H72  DT A  61     -35.378   6.000 -14.130  1.00  0.00           H  
ATOM   1956  H73  DT A  61     -35.784   5.367 -12.530  4.00  0.00           H  
ATOM   1957 H2''  DT A  61     -30.859   4.549 -16.900  9.00  0.00           H  
ATOM   1958 H5''  DT A  61     -29.680   8.472 -13.830  8.00  0.00           H  
ATOM   1959  P    DA A  62     -27.887   4.826 -17.900  9.00  0.00           P  
ATOM   1960  C5'  DA A  62     -28.418   2.539 -16.710  8.00  0.00           C  
ATOM   1961  O5'  DA A  62     -28.638   3.462 -17.820  3.00  0.00           O  
ATOM   1962  C4'  DA A  62     -29.527   1.481 -16.490  4.00  0.00           C  
ATOM   1963  O4'  DA A  62     -30.859   2.041 -16.440  4.00  0.00           O  
ATOM   1964  C3'  DA A  62     -29.503   0.605 -17.670  3.00  0.00           C  
ATOM   1965  O3'  DA A  62     -29.868  -0.665 -17.260  9.00  0.00           O  
ATOM   1966  C2'  DA A  62     -30.577   1.216 -18.610  3.00  0.00           C  
ATOM   1967  C1'  DA A  62     -31.622   1.489 -17.410  1.00  0.00           C  
ATOM   1968  N1   DA A  62     -36.557   2.337 -16.210  9.00  0.00           N  
ATOM   1969  C2   DA A  62     -35.667   1.563 -15.720  2.00  0.00           C  
ATOM   1970  N3   DA A  62     -34.345   1.446 -16.010  3.00  0.00           N  
ATOM   1971  C4   DA A  62     -34.065   2.277 -17.040  3.00  0.00           C  
ATOM   1972  C5   DA A  62     -34.825   3.197 -17.660  8.00  0.00           C  
ATOM   1973  C6   DA A  62     -36.155   3.172 -17.180  5.00  0.00           C  
ATOM   1974  N6   DA A  62     -37.167   3.896 -17.650  2.00  0.00           N  
ATOM   1975  N7   DA A  62     -34.095   3.891 -18.620  8.00  0.00           N  
ATOM   1976  C8   DA A  62     -32.918   3.413 -18.480  0.00  0.00           C  
ATOM   1977  N9   DA A  62     -32.812   2.351 -17.600  5.00  0.00           N  
ATOM   1978  OP1  DA A  62     -26.378   4.677 -17.910  9.00  0.00           O  
ATOM   1979  OP2  DA A  62     -28.597   5.621 -18.980  9.00  0.00           O1-
ATOM   1980  H2   DA A  62     -36.046   1.020 -14.890  7.00  0.00           H  
ATOM   1981  H8   DA A  62     -32.079   3.776 -18.990  4.00  0.00           H  
ATOM   1982  H1'  DA A  62     -32.022   0.556 -17.070  4.00  0.00           H  
ATOM   1983  H2'  DA A  62     -30.276   1.996 -19.190  4.00  0.00           H  
ATOM   1984  H3'  DA A  62     -28.475   0.525 -18.130  1.00  0.00           H  
ATOM   1985  H4'  DA A  62     -29.309   0.797 -15.680  8.00  0.00           H  
ATOM   1986  H5'  DA A  62     -28.144   2.947 -15.730  0.00  0.00           H  
ATOM   1987  H61  DA A  62     -38.046   3.736 -17.280  6.00  0.00           H  
ATOM   1988  H62  DA A  62     -36.989   4.683 -18.370  0.00  0.00           H  
ATOM   1989 H2''  DA A  62     -30.923   0.426 -19.320  2.00  0.00           H  
ATOM   1990 H5''  DA A  62     -27.451   2.018 -16.920  3.00  0.00           H  
ATOM   1991  P    DA A  63     -28.872  -1.837 -16.870  1.00  0.00           P  
ATOM   1992  C5'  DA A  63     -27.445  -3.115 -18.710  9.00  0.00           C  
ATOM   1993  O5'  DA A  63     -28.391  -2.170 -18.340  0.00  0.00           O  
ATOM   1994  C4'  DA A  63     -27.082  -3.154 -20.190  1.00  0.00           C  
ATOM   1995  O4'  DA A  63     -28.219  -3.257 -21.030  8.00  0.00           O  
ATOM   1996  C3'  DA A  63     -26.413  -1.839 -20.660  7.00  0.00           C  
ATOM   1997  O3'  DA A  63     -25.382  -1.977 -21.700  2.00  0.00           O  
ATOM   1998  C2'  DA A  63     -27.598  -0.946 -21.060  2.00  0.00           C  
ATOM   1999  C1'  DA A  63     -28.427  -2.059 -21.800  0.00  0.00           C  
ATOM   2000  N1   DA A  63     -32.279  -0.682 -24.990  4.00  0.00           N  
ATOM   2001  C2   DA A  63     -30.979  -0.812 -25.200  0.00  0.00           C  
ATOM   2002  N3   DA A  63     -29.988  -1.128 -24.300  6.00  0.00           N  
ATOM   2003  C4   DA A  63     -30.516  -1.308 -23.060  7.00  0.00           C  
ATOM   2004  C5   DA A  63     -31.821  -1.258 -22.730  3.00  0.00           C  
ATOM   2005  C6   DA A  63     -32.696  -0.888 -23.820  8.00  0.00           C  
ATOM   2006  N6   DA A  63     -33.984  -0.800 -23.700  1.00  0.00           N  
ATOM   2007  N7   DA A  63     -32.013  -1.506 -21.340  1.00  0.00           N  
ATOM   2008  C8   DA A  63     -30.755  -1.754 -21.000  1.00  0.00           C  
ATOM   2009  N9   DA A  63     -29.811  -1.604 -21.880  5.00  0.00           N  
ATOM   2010  OP1  DA A  63     -29.514  -3.016 -16.270  1.00  0.00           O  
ATOM   2011  OP2  DA A  63     -27.801  -1.126 -16.170  2.00  0.00           O1-
ATOM   2012  H2   DA A  63     -30.676  -0.483 -26.160  7.00  0.00           H  
ATOM   2013  H8   DA A  63     -30.532  -2.198 -20.010  0.00  0.00           H  
ATOM   2014  H1'  DA A  63     -28.024  -2.202 -22.750  2.00  0.00           H  
ATOM   2015  H2'  DA A  63     -28.127  -0.557 -20.190  8.00  0.00           H  
ATOM   2016  H3'  DA A  63     -25.936  -1.266 -19.840  4.00  0.00           H  
ATOM   2017  H4'  DA A  63     -26.328  -3.983 -20.240  4.00  0.00           H  
ATOM   2018  H5'  DA A  63     -27.747  -4.045 -18.360  8.00  0.00           H  
ATOM   2019  H61  DA A  63     -34.380  -0.437 -24.580  1.00  0.00           H  
ATOM   2020  H62  DA A  63     -34.453  -0.968 -22.830  7.00  0.00           H  
ATOM   2021 H2''  DA A  63     -27.305  -0.110 -21.760  9.00  0.00           H  
ATOM   2022 H5''  DA A  63     -26.502  -2.909 -18.240  9.00  0.00           H  
ATOM   2023  P   DCP A  64     -24.218  -0.833 -21.990  5.00  0.00           P  
ATOM   2024  C5' DCP A  64     -24.936  -0.689 -24.540  1.00  0.00           C  
ATOM   2025  O5' DCP A  64     -24.836  -0.067 -23.280  9.00  0.00           O  
ATOM   2026  C4' DCP A  64     -25.925   0.057 -25.480  6.00  0.00           C  
ATOM   2027  O4' DCP A  64     -27.110   0.222 -24.750  0.00  0.00           O  
ATOM   2028  C3' DCP A  64     -25.558   1.455 -25.890  5.00  0.00           C  
ATOM   2029  O3' DCP A  64     -24.844   1.324 -27.090  6.00  0.00           O  
ATOM   2030  C2' DCP A  64     -26.931   2.138 -26.010  8.00  0.00           C  
ATOM   2031  C1' DCP A  64     -27.884   1.286 -25.210  6.00  0.00           C  
ATOM   2032  N1  DCP A  64     -28.355   2.029 -24.050  3.00  0.00           N  
ATOM   2033  C2  DCP A  64     -29.712   2.397 -23.910  6.00  0.00           C  
ATOM   2034  O2  DCP A  64     -30.515   2.223 -24.830  6.00  0.00           O  
ATOM   2035  N3  DCP A  64     -30.115   3.060 -22.820  3.00  0.00           N  
ATOM   2036  C4  DCP A  64     -29.263   3.427 -21.900  9.00  0.00           C  
ATOM   2037  N4  DCP A  64     -29.747   4.044 -20.900  2.00  0.00           N  
ATOM   2038  C5  DCP A  64     -27.842   3.112 -21.960  7.00  0.00           C  
ATOM   2039  C6  DCP A  64     -27.433   2.391 -23.050  7.00  0.00           C  
ATOM   2040  OP1 DCP A  64     -22.905  -1.467 -22.300  5.00  0.00           O  
ATOM   2041  OP2 DCP A  64     -24.199   0.148 -20.850  7.00  0.00           O  
ATOM   2042  H3  DCP A  64     -31.116   3.264 -22.650  8.00  0.00           H  
ATOM   2043  H5  DCP A  64     -27.075   3.346 -21.150  8.00  0.00           H  
ATOM   2044  H6  DCP A  64     -26.350   2.041 -23.120  2.00  0.00           H  
ATOM   2045  H1' DCP A  64     -28.742   1.046 -25.870  2.00  0.00           H  
ATOM   2046  H2' DCP A  64     -26.860   3.275 -25.650  6.00  0.00           H  
ATOM   2047  H3' DCP A  64     -24.938   1.891 -25.120  5.00  0.00           H  
ATOM   2048  H4' DCP A  64     -26.113  -0.497 -26.430  0.00  0.00           H  
ATOM   2049  H41 DCP A  64     -30.785   4.238 -20.790  6.00  0.00           H  
ATOM   2050  H5' DCP A  64     -25.317  -1.638 -24.290  9.00  0.00           H  
ATOM   2051  H42 DCP A  64     -29.119   4.383 -20.170  3.00  0.00           H  
ATOM   2052 H2'' DCP A  64     -27.192   2.129 -27.090  8.00  0.00           H  
ATOM   2053 H5'' DCP A  64     -23.993  -0.861 -25.190  1.00  0.00           H  
ATOM   2054  P   DCP A  65     -24.102   2.504 -27.770  8.00  0.00           P  
ATOM   2055  C5' DCP A  65     -25.843   2.849 -29.890  5.00  0.00           C  
ATOM   2056  O5' DCP A  65     -25.205   3.325 -28.670  0.00  0.00           O  
ATOM   2057  C4' DCP A  65     -26.687   3.940 -30.590  5.00  0.00           C  
ATOM   2058  O4' DCP A  65     -27.858   4.159 -29.760  0.00  0.00           O  
ATOM   2059  C3' DCP A  65     -25.956   5.263 -30.870  8.00  0.00           C  
ATOM   2060  O3' DCP A  65     -25.366   5.250 -32.180  1.00  0.00           O  
ATOM   2061  C2' DCP A  65     -27.053   6.295 -30.730  4.00  0.00           C  
ATOM   2062  C1' DCP A  65     -28.063   5.603 -29.750  8.00  0.00           C  
ATOM   2063  N1  DCP A  65     -27.744   6.196 -28.360  1.00  0.00           N  
ATOM   2064  C2  DCP A  65     -28.659   7.152 -27.820  4.00  0.00           C  
ATOM   2065  O2  DCP A  65     -29.795   7.331 -28.330  7.00  0.00           O  
ATOM   2066  N3  DCP A  65     -28.379   7.798 -26.640  6.00  0.00           N  
ATOM   2067  C4  DCP A  65     -27.202   7.723 -26.090  3.00  0.00           C  
ATOM   2068  N4  DCP A  65     -26.951   8.573 -25.110  2.00  0.00           N  
ATOM   2069  C5  DCP A  65     -26.241   6.742 -26.440  2.00  0.00           C  
ATOM   2070  C6  DCP A  65     -26.576   5.994 -27.530  4.00  0.00           C  
ATOM   2071  OP1 DCP A  65     -22.996   1.929 -28.580  0.00  0.00           O  
ATOM   2072  OP2 DCP A  65     -23.730   3.459 -26.740  4.00  0.00           O  
ATOM   2073  H3  DCP A  65     -29.057   8.418 -26.280  7.00  0.00           H  
ATOM   2074  H5  DCP A  65     -25.278   6.673 -25.970  2.00  0.00           H  
ATOM   2075  H6  DCP A  65     -25.789   5.447 -27.950  5.00  0.00           H  
ATOM   2076  H1' DCP A  65     -29.109   5.824 -30.050  0.00  0.00           H  
ATOM   2077  H2' DCP A  65     -26.638   7.214 -30.440  3.00  0.00           H  
ATOM   2078  H3' DCP A  65     -25.214   5.447 -30.000  4.00  0.00           H  
ATOM   2079  H4' DCP A  65     -26.959   3.498 -31.580  4.00  0.00           H  
ATOM   2080  H41 DCP A  65     -27.721   9.071 -24.730  2.00  0.00           H  
ATOM   2081  H5' DCP A  65     -26.498   2.102 -29.690  9.00  0.00           H  
ATOM   2082  H42 DCP A  65     -26.032   8.697 -24.810  9.00  0.00           H  
ATOM   2083 H2'' DCP A  65     -27.535   6.446 -31.720  9.00  0.00           H  
ATOM   2084 H5'' DCP A  65     -25.021   2.504 -30.530  7.00  0.00           H  
ATOM   2085  P   DCP A  66     -24.338   6.427 -32.590  7.00  0.00           P  
ATOM   2086  C5' DCP A  66     -26.203   7.636 -33.950  5.00  0.00           C  
ATOM   2087  O5' DCP A  66     -25.334   7.597 -32.840  7.00  0.00           O  
ATOM   2088  C4' DCP A  66     -26.639   9.071 -34.140  2.00  0.00           C  
ATOM   2089  O4' DCP A  66     -26.968   9.644 -32.820  1.00  0.00           O  
ATOM   2090  C3' DCP A  66     -25.551  10.036 -34.660  0.00  0.00           C  
ATOM   2091  O3' DCP A  66     -25.278   9.948 -36.080  0.00  0.00           O  
ATOM   2092  C2' DCP A  66     -26.186  11.344 -34.340  1.00  0.00           C  
ATOM   2093  C1' DCP A  66     -26.891  11.062 -33.060  9.00  0.00           C  
ATOM   2094  N1  DCP A  66     -26.192  11.652 -31.900  0.00  0.00           N  
ATOM   2095  C2  DCP A  66     -26.986  12.335 -30.990  8.00  0.00           C  
ATOM   2096  O2  DCP A  66     -28.248  12.474 -30.970  2.00  0.00           O  
ATOM   2097  N3  DCP A  66     -26.369  12.942 -29.950  5.00  0.00           N  
ATOM   2098  C4  DCP A  66     -25.069  12.907 -29.760  6.00  0.00           C  
ATOM   2099  N4  DCP A  66     -24.673  13.696 -28.750  3.00  0.00           N  
ATOM   2100  C5  DCP A  66     -24.308  11.974 -30.450  9.00  0.00           C  
ATOM   2101  C6  DCP A  66     -24.903  11.315 -31.510  9.00  0.00           C  
ATOM   2102  OP1 DCP A  66     -23.581   6.096 -33.780  0.00  0.00           O  
ATOM   2103  OP2 DCP A  66     -23.593   6.750 -31.340  1.00  0.00           O  
ATOM   2104  H3  DCP A  66     -27.016  13.553 -29.410  5.00  0.00           H  
ATOM   2105  H5  DCP A  66     -23.241  11.829 -30.280  4.00  0.00           H  
ATOM   2106  H6  DCP A  66     -24.388  10.565 -32.060  4.00  0.00           H  
ATOM   2107  H1' DCP A  66     -27.940  11.382 -33.150  4.00  0.00           H  
ATOM   2108  H2' DCP A  66     -25.400  12.128 -34.280  5.00  0.00           H  
ATOM   2109  H3' DCP A  66     -24.659   9.847 -34.090  2.00  0.00           H  
ATOM   2110  H4' DCP A  66     -27.495   9.054 -34.820  5.00  0.00           H  
ATOM   2111  H41 DCP A  66     -25.308  14.161 -28.120  4.00  0.00           H  
ATOM   2112  H5' DCP A  66     -27.083   6.974 -33.720  1.00  0.00           H  
ATOM   2113  H42 DCP A  66     -23.690  13.731 -28.520  2.00  0.00           H  
ATOM   2114 H2'' DCP A  66     -26.883  11.629 -35.130  5.00  0.00           H  
ATOM   2115 H5'' DCP A  66     -25.645   7.316 -34.840  7.00  0.00           H  
ATOM   2116  P    DT A  67     -23.893  10.503 -36.790  0.00  0.00           P  
ATOM   2117  C5'  DT A  67     -23.862  13.104 -37.450  1.00  0.00           C  
ATOM   2118  O5'  DT A  67     -23.712  12.097 -36.440  4.00  0.00           O  
ATOM   2119  C4'  DT A  67     -25.300  13.592 -37.380  5.00  0.00           C  
ATOM   2120  O4'  DT A  67     -25.505  14.309 -36.210  0.00  0.00           O  
ATOM   2121  C3'  DT A  67     -25.618  14.438 -38.610  7.00  0.00           C  
ATOM   2122  O3'  DT A  67     -27.059  14.370 -38.850  5.00  0.00           O  
ATOM   2123  C2'  DT A  67     -25.285  15.817 -38.040  6.00  0.00           C  
ATOM   2124  C1'  DT A  67     -25.750  15.628 -36.650  3.00  0.00           C  
ATOM   2125  N1   DT A  67     -25.243  16.581 -35.640  6.00  0.00           N  
ATOM   2126  C2   DT A  67     -26.281  17.357 -35.090  5.00  0.00           C  
ATOM   2127  O2   DT A  67     -27.425  17.327 -35.360  9.00  0.00           O  
ATOM   2128  N3   DT A  67     -25.933  18.285 -34.140  2.00  0.00           N  
ATOM   2129  C4   DT A  67     -24.652  18.430 -33.700  0.00  0.00           C  
ATOM   2130  O4   DT A  67     -24.439  19.172 -32.790  9.00  0.00           O  
ATOM   2131  C5   DT A  67     -23.607  17.533 -34.280  6.00  0.00           C  
ATOM   2132  C6   DT A  67     -23.949  16.668 -35.300  7.00  0.00           C  
ATOM   2133  C7   DT A  67     -22.130  17.482 -33.930  8.00  0.00           C  
ATOM   2134  OP1  DT A  67     -24.052  10.365 -38.250  7.00  0.00           O  
ATOM   2135  OP2  DT A  67     -22.757   9.699 -36.230  6.00  0.00           O1-
ATOM   2136  H3   DT A  67     -26.602  19.009 -33.950  3.00  0.00           H  
ATOM   2137  H6   DT A  67     -23.199  16.012 -35.790  3.00  0.00           H  
ATOM   2138  H1'  DT A  67     -26.855  15.707 -36.660  5.00  0.00           H  
ATOM   2139  H2'  DT A  67     -24.213  16.077 -38.130  0.00  0.00           H  
ATOM   2140  H3'  DT A  67     -24.993  14.110 -39.460  6.00  0.00           H  
ATOM   2141  H4'  DT A  67     -25.961  12.748 -37.480  2.00  0.00           H  
ATOM   2142  H5'  DT A  67     -23.585  12.775 -38.480  0.00  0.00           H  
ATOM   2143  H71  DT A  67     -21.611  16.689 -34.490  4.00  0.00           H  
ATOM   2144  H72  DT A  67     -22.071  17.251 -32.900  6.00  0.00           H  
ATOM   2145  H73  DT A  67     -21.722  18.494 -33.970  1.00  0.00           H  
ATOM   2146 H2''  DT A  67     -25.840  16.611 -38.500  8.00  0.00           H  
ATOM   2147 H5''  DT A  67     -23.356  14.057 -37.190  0.00  0.00           H  
ATOM   2148  P    DA A  68     -27.703  14.874 -40.220  5.00  0.00           P  
ATOM   2149  C5'  DA A  68     -28.525  17.016 -38.890  1.00  0.00           C  
ATOM   2150  O5'  DA A  68     -27.721  16.491 -39.990  6.00  0.00           O  
ATOM   2151  C4'  DA A  68     -28.420  18.507 -38.790  9.00  0.00           C  
ATOM   2152  O4'  DA A  68     -27.285  18.842 -38.040  2.00  0.00           O  
ATOM   2153  C3'  DA A  68     -28.343  19.332 -40.070  6.00  0.00           C  
ATOM   2154  O3'  DA A  68     -28.920  20.659 -39.910  4.00  0.00           O  
ATOM   2155  C2'  DA A  68     -26.888  19.535 -40.290  3.00  0.00           C  
ATOM   2156  C1'  DA A  68     -26.440  19.737 -38.820  4.00  0.00           C  
ATOM   2157  N1   DA A  68     -22.356  20.531 -35.870  8.00  0.00           N  
ATOM   2158  C2   DA A  68     -23.624  20.888 -35.780  7.00  0.00           C  
ATOM   2159  N3   DA A  68     -24.626  20.522 -36.560  2.00  0.00           N  
ATOM   2160  C4   DA A  68     -24.172  19.786 -37.590  8.00  0.00           C  
ATOM   2161  C5   DA A  68     -22.908  19.437 -37.830  5.00  0.00           C  
ATOM   2162  C6   DA A  68     -21.958  19.780 -36.850  3.00  0.00           C  
ATOM   2163  N6   DA A  68     -20.658  19.340 -36.780  5.00  0.00           N  
ATOM   2164  N7   DA A  68     -22.890  18.664 -38.990  4.00  0.00           N  
ATOM   2165  C8   DA A  68     -24.145  18.671 -39.420  0.00  0.00           C  
ATOM   2166  N9   DA A  68     -25.038  19.335 -38.580  3.00  0.00           N  
ATOM   2167  OP1  DA A  68     -29.099  14.340 -40.330  4.00  0.00           O  
ATOM   2168  OP2  DA A  68     -26.746  14.630 -41.330  1.00  0.00           O1-
ATOM   2169  H2   DA A  68     -23.893  21.451 -34.910  6.00  0.00           H  
ATOM   2170  H8   DA A  68     -24.399  18.261 -40.360  7.00  0.00           H  
ATOM   2171  H1'  DA A  68     -26.652  20.798 -38.560  7.00  0.00           H  
ATOM   2172  H2'  DA A  68     -26.471  18.602 -40.760  6.00  0.00           H  
ATOM   2173  H3'  DA A  68     -28.844  18.844 -40.920  1.00  0.00           H  
ATOM   2174  H4'  DA A  68     -29.235  18.809 -38.230  7.00  0.00           H  
ATOM   2175  H5'  DA A  68     -28.205  16.639 -37.970  2.00  0.00           H  
ATOM   2176  H61  DA A  68     -20.120  19.424 -35.900  4.00  0.00           H  
ATOM   2177  H62  DA A  68     -20.300  18.817 -37.580  3.00  0.00           H  
ATOM   2178 H2''  DA A  68     -26.759  20.490 -40.810  5.00  0.00           H  
ATOM   2179 H5''  DA A  68     -29.601  16.834 -39.150  4.00  0.00           H  
ATOM   2180  P    DA A  69     -30.059  21.132 -40.910  9.00  0.00           P  
ATOM   2181  C5'  DA A  69     -32.186  20.144 -39.820  2.00  0.00           C  
ATOM   2182  O5'  DA A  69     -31.179  20.059 -40.760  1.00  0.00           O  
ATOM   2183  C4'  DA A  69     -33.117  18.897 -39.920  8.00  0.00           C  
ATOM   2184  O4'  DA A  69     -33.489  18.656 -41.290  7.00  0.00           O  
ATOM   2185  C3'  DA A  69     -32.480  17.622 -39.550  8.00  0.00           C  
ATOM   2186  O3'  DA A  69     -33.419  16.610 -39.270  3.00  0.00           O  
ATOM   2187  C2'  DA A  69     -31.835  17.089 -40.910  8.00  0.00           C  
ATOM   2188  C1'  DA A  69     -32.941  17.460 -41.830  4.00  0.00           C  
ATOM   2189  N1   DA A  69     -34.455  16.608 -46.630  9.00  0.00           N  
ATOM   2190  C2   DA A  69     -34.941  16.174 -45.480  0.00  0.00           C  
ATOM   2191  N3   DA A  69     -34.356  16.338 -44.270  3.00  0.00           N  
ATOM   2192  C4   DA A  69     -33.236  17.051 -44.320  1.00  0.00           C  
ATOM   2193  C5   DA A  69     -32.606  17.528 -45.450  6.00  0.00           C  
ATOM   2194  C6   DA A  69     -33.333  17.297 -46.650  4.00  0.00           C  
ATOM   2195  N6   DA A  69     -33.097  17.808 -47.830  0.00  0.00           N  
ATOM   2196  N7   DA A  69     -31.458  18.307 -45.100  7.00  0.00           N  
ATOM   2197  C8   DA A  69     -31.452  18.184 -43.780  5.00  0.00           C  
ATOM   2198  N9   DA A  69     -32.508  17.504 -43.240  7.00  0.00           N  
ATOM   2199  OP1  DA A  69     -29.494  21.122 -42.280  7.00  0.00           O  
ATOM   2200  OP2  DA A  69     -30.554  22.386 -40.320  5.00  0.00           O1-
ATOM   2201  H2   DA A  69     -35.888  15.683 -45.540  5.00  0.00           H  
ATOM   2202  H8   DA A  69     -30.731  18.672 -43.170  2.00  0.00           H  
ATOM   2203  H1'  DA A  69     -33.668  16.623 -41.640  4.00  0.00           H  
ATOM   2204  H2'  DA A  69     -30.903  17.612 -41.080  1.00  0.00           H  
ATOM   2205  H3'  DA A  69     -31.758  17.601 -38.690  4.00  0.00           H  
ATOM   2206  H4'  DA A  69     -34.097  19.083 -39.340  1.00  0.00           H  
ATOM   2207  H5'  DA A  69     -32.835  21.000 -39.960  7.00  0.00           H  
ATOM   2208  H61  DA A  69     -33.721  17.485 -48.610  7.00  0.00           H  
ATOM   2209  H62  DA A  69     -32.328  18.418 -47.900  7.00  0.00           H  
ATOM   2210 H2''  DA A  69     -31.676  15.965 -40.800  4.00  0.00           H  
ATOM   2211 H5''  DA A  69     -31.704  20.129 -38.770  7.00  0.00           H  
ATOM   2212  P    DC A  70     -33.632  16.050 -37.780  4.00  0.00           P  
ATOM   2213  C5'  DC A  70     -31.387  14.574 -38.040  3.00  0.00           C  
ATOM   2214  O5'  DC A  70     -32.118  15.557 -37.310  4.00  0.00           O  
ATOM   2215  C4'  DC A  70     -30.288  13.837 -37.250  7.00  0.00           C  
ATOM   2216  O4'  DC A  70     -29.471  14.737 -36.500  9.00  0.00           O  
ATOM   2217  C3'  DC A  70     -30.812  12.939 -36.150  6.00  0.00           C  
ATOM   2218  O3'  DC A  70     -30.961  11.636 -36.750  4.00  0.00           O  
ATOM   2219  C2'  DC A  70     -29.748  12.911 -35.040  2.00  0.00           C  
ATOM   2220  C1'  DC A  70     -28.883  14.141 -35.350  9.00  0.00           C  
ATOM   2221  N1   DC A  70     -28.926  15.033 -34.220  5.00  0.00           N  
ATOM   2222  C2   DC A  70     -27.796  15.095 -33.390  6.00  0.00           C  
ATOM   2223  O2   DC A  70     -26.842  14.368 -33.520  2.00  0.00           O  
ATOM   2224  N3   DC A  70     -27.809  15.964 -32.330  5.00  0.00           N  
ATOM   2225  C4   DC A  70     -28.810  16.751 -32.040  2.00  0.00           C  
ATOM   2226  N4   DC A  70     -28.707  17.616 -31.100  7.00  0.00           N  
ATOM   2227  C5   DC A  70     -29.968  16.615 -32.730  3.00  0.00           C  
ATOM   2228  C6   DC A  70     -30.002  15.752 -33.790  0.00  0.00           C  
ATOM   2229  OP1  DC A  70     -34.540  14.904 -37.860  7.00  0.00           O  
ATOM   2230  OP2  DC A  70     -34.026  17.162 -36.900  5.00  0.00           O1-
ATOM   2231  H5   DC A  70     -30.926  17.161 -32.470  8.00  0.00           H  
ATOM   2232  H6   DC A  70     -30.949  15.682 -34.330  2.00  0.00           H  
ATOM   2233  H1'  DC A  70     -27.805  13.895 -35.530  3.00  0.00           H  
ATOM   2234  H2'  DC A  70     -30.120  12.945 -34.000  2.00  0.00           H  
ATOM   2235  H3'  DC A  70     -31.746  13.305 -35.680  1.00  0.00           H  
ATOM   2236  H4'  DC A  70     -29.498  13.333 -37.800  2.00  0.00           H  
ATOM   2237  H41  DC A  70     -27.886  17.779 -30.570  1.00  0.00           H  
ATOM   2238  H5'  DC A  70     -30.829  14.997 -38.850  0.00  0.00           H  
ATOM   2239  H42  DC A  70     -29.514  18.148 -30.830  8.00  0.00           H  
ATOM   2240 H2''  DC A  70     -29.095  12.059 -35.230  1.00  0.00           H  
ATOM   2241 H5''  DC A  70     -32.081  13.832 -38.290  5.00  0.00           H  
ATOM   2242  P    DC A  71     -31.983  10.654 -36.200  7.00  0.00           P  
ATOM   2243  C5'  DC A  71     -30.383   9.337 -34.580  7.00  0.00           C  
ATOM   2244  O5'  DC A  71     -31.502  10.206 -34.690  7.00  0.00           O  
ATOM   2245  C4'  DC A  71     -30.157   8.828 -33.130  3.00  0.00           C  
ATOM   2246  O4'  DC A  71     -29.934   9.851 -32.160  6.00  0.00           O  
ATOM   2247  C3'  DC A  71     -31.328   8.051 -32.440  9.00  0.00           C  
ATOM   2248  O3'  DC A  71     -31.572   6.763 -33.080  7.00  0.00           O  
ATOM   2249  C2'  DC A  71     -30.919   7.998 -30.990  8.00  0.00           C  
ATOM   2250  C1'  DC A  71     -29.897   9.235 -30.890  5.00  0.00           C  
ATOM   2251  N1   DC A  71     -30.170  10.271 -29.860  4.00  0.00           N  
ATOM   2252  C2   DC A  71     -29.213  10.564 -28.920  3.00  0.00           C  
ATOM   2253  O2   DC A  71     -28.059  10.115 -28.980  8.00  0.00           O  
ATOM   2254  N3   DC A  71     -29.357  11.392 -27.880  0.00  0.00           N  
ATOM   2255  C4   DC A  71     -30.590  12.008 -27.850  4.00  0.00           C  
ATOM   2256  N4   DC A  71     -30.850  12.666 -26.740  6.00  0.00           N  
ATOM   2257  C5   DC A  71     -31.477  11.960 -28.930  2.00  0.00           C  
ATOM   2258  C6   DC A  71     -31.324  11.056 -29.900  1.00  0.00           C  
ATOM   2259  OP1  DC A  71     -31.884   9.409 -37.070  6.00  0.00           O  
ATOM   2260  OP2  DC A  71     -33.261  11.375 -36.050  9.00  0.00           O1-
ATOM   2261  H5   DC A  71     -32.357  12.568 -28.920  3.00  0.00           H  
ATOM   2262  H6   DC A  71     -32.116  10.851 -30.600  8.00  0.00           H  
ATOM   2263  H1'  DC A  71     -28.857   8.982 -30.720  7.00  0.00           H  
ATOM   2264  H2'  DC A  71     -31.782   8.071 -30.350  7.00  0.00           H  
ATOM   2265  H3'  DC A  71     -32.105   8.808 -32.630  5.00  0.00           H  
ATOM   2266  H4'  DC A  71     -29.279   8.147 -33.080  1.00  0.00           H  
ATOM   2267  H41  DC A  71     -30.051  12.771 -26.180  9.00  0.00           H  
ATOM   2268  H5'  DC A  71     -29.497   9.812 -34.960  2.00  0.00           H  
ATOM   2269  H42  DC A  71     -31.714  13.203 -26.550  7.00  0.00           H  
ATOM   2270 H2''  DC A  71     -30.310   7.080 -30.820  2.00  0.00           H  
ATOM   2271 H5''  DC A  71     -30.523   8.427 -35.230  0.00  0.00           H  
ATOM   2272  P    DC A  72     -32.741   5.828 -32.500  0.00  0.00           P  
ATOM   2273  C5'  DC A  72     -31.258   4.029 -31.160  5.00  0.00           C  
ATOM   2274  O5'  DC A  72     -32.262   5.148 -31.050  3.00  0.00           O  
ATOM   2275  C4'  DC A  72     -31.077   3.407 -29.750  8.00  0.00           C  
ATOM   2276  O4'  DC A  72     -30.670   4.397 -28.840  8.00  0.00           O  
ATOM   2277  C3'  DC A  72     -32.351   2.834 -29.130  7.00  0.00           C  
ATOM   2278  O3'  DC A  72     -32.671   1.517 -29.520  1.00  0.00           O  
ATOM   2279  C2'  DC A  72     -31.889   2.786 -27.620  6.00  0.00           C  
ATOM   2280  C1'  DC A  72     -30.896   3.925 -27.530  4.00  0.00           C  
ATOM   2281  N1   DC A  72     -31.331   5.047 -26.610  6.00  0.00           N  
ATOM   2282  C2   DC A  72     -30.495   5.476 -25.590  6.00  0.00           C  
ATOM   2283  O2   DC A  72     -29.361   5.095 -25.460  7.00  0.00           O  
ATOM   2284  N3   DC A  72     -30.940   6.313 -24.560  9.00  0.00           N  
ATOM   2285  C4   DC A  72     -32.093   6.845 -24.810  8.00  0.00           C  
ATOM   2286  N4   DC A  72     -32.525   7.571 -23.830  7.00  0.00           N  
ATOM   2287  C5   DC A  72     -32.989   6.538 -25.860  4.00  0.00           C  
ATOM   2288  C6   DC A  72     -32.572   5.594 -26.730  9.00  0.00           C  
ATOM   2289  OP1  DC A  72     -33.015   4.716 -33.480  8.00  0.00           O  
ATOM   2290  OP2  DC A  72     -33.841   6.766 -32.280  4.00  0.00           O1-
ATOM   2291  H5   DC A  72     -33.960   6.920 -26.020  2.00  0.00           H  
ATOM   2292  H6   DC A  72     -33.197   5.314 -27.620  2.00  0.00           H  
ATOM   2293  H1'  DC A  72     -29.966   3.531 -27.190  3.00  0.00           H  
ATOM   2294  H2'  DC A  72     -32.749   2.895 -26.970  1.00  0.00           H  
ATOM   2295  H3'  DC A  72     -33.140   3.559 -29.180  5.00  0.00           H  
ATOM   2296  H4'  DC A  72     -30.285   2.571 -29.840  7.00  0.00           H  
ATOM   2297  H41  DC A  72     -31.966   7.717 -23.000  2.00  0.00           H  
ATOM   2298  H5'  DC A  72     -30.342   4.386 -31.650  4.00  0.00           H  
ATOM   2299  H42  DC A  72     -33.401   8.040 -23.970  9.00  0.00           H  
ATOM   2300 H2''  DC A  72     -31.338   1.839 -27.340  5.00  0.00           H  
ATOM   2301 H5''  DC A  72     -31.534   3.200 -31.770  1.00  0.00           H  
ATOM   2302  P    DT A  73     -34.250   1.131 -29.530  3.00  0.00           P  
ATOM   2303  C5'  DT A  73     -34.088  -1.061 -28.150  1.00  0.00           C  
ATOM   2304  O5'  DT A  73     -34.133  -0.395 -29.420  7.00  0.00           O  
ATOM   2305  C4'  DT A  73     -34.178  -2.583 -28.370  2.00  0.00           C  
ATOM   2306  O4'  DT A  73     -33.159  -3.187 -29.180  4.00  0.00           O  
ATOM   2307  C3'  DT A  73     -34.205  -3.369 -27.080  7.00  0.00           C  
ATOM   2308  O3'  DT A  73     -35.061  -4.516 -27.120  8.00  0.00           O  
ATOM   2309  C2'  DT A  73     -32.739  -3.649 -26.980  1.00  0.00           C  
ATOM   2310  C1'  DT A  73     -32.290  -3.989 -28.370  5.00  0.00           C  
ATOM   2311  N1   DT A  73     -30.880  -3.630 -28.670  0.00  0.00           N  
ATOM   2312  C2   DT A  73     -29.921  -4.658 -28.750  2.00  0.00           C  
ATOM   2313  O2   DT A  73     -30.299  -5.794 -28.560  9.00  0.00           O  
ATOM   2314  N3   DT A  73     -28.604  -4.392 -28.870  9.00  0.00           N  
ATOM   2315  C4   DT A  73     -28.149  -3.087 -29.120  9.00  0.00           C  
ATOM   2316  O4   DT A  73     -26.951  -2.912 -29.220  1.00  0.00           O  
ATOM   2317  C5   DT A  73     -29.165  -2.030 -29.090  9.00  0.00           C  
ATOM   2318  C6   DT A  73     -30.462  -2.285 -28.870  5.00  0.00           C  
ATOM   2319  C7   DT A  73     -28.788  -0.490 -29.280  1.00  0.00           C  
ATOM   2320  OP1  DT A  73     -34.826   1.446 -30.830  7.00  0.00           O  
ATOM   2321  OP2  DT A  73     -34.939   1.681 -28.310  3.00  0.00           O1-
ATOM   2322  H3   DT A  73     -27.908  -5.128 -28.980  2.00  0.00           H  
ATOM   2323  H6   DT A  73     -31.136  -1.451 -29.010  0.00  0.00           H  
ATOM   2324  H1'  DT A  73     -32.387  -5.020 -28.470  3.00  0.00           H  
ATOM   2325  H2'  DT A  73     -32.240  -2.726 -26.580  9.00  0.00           H  
ATOM   2326  H3'  DT A  73     -34.564  -2.743 -26.240  3.00  0.00           H  
ATOM   2327  H4'  DT A  73     -35.140  -2.755 -28.870  6.00  0.00           H  
ATOM   2328  H5'  DT A  73     -34.964  -0.789 -27.530  8.00  0.00           H  
ATOM   2329  H71  DT A  73     -28.225  -0.462 -30.240  2.00  0.00           H  
ATOM   2330  H72  DT A  73     -29.648   0.209 -29.330  8.00  0.00           H  
ATOM   2331  H73  DT A  73     -28.069  -0.168 -28.640  5.00  0.00           H  
ATOM   2332 H2''  DT A  73     -32.641  -4.513 -26.330  8.00  0.00           H  
ATOM   2333 H5''  DT A  73     -33.245  -0.727 -27.620  9.00  0.00           H  
ATOM   2334  P    DA A  74     -35.755  -5.086 -25.800  7.00  0.00           P  
ATOM   2335  C5'  DA A  74     -38.114  -3.962 -26.040  0.00  0.00           C  
ATOM   2336  O5'  DA A  74     -36.930  -4.069 -25.350  6.00  0.00           O  
ATOM   2337  C4'  DA A  74     -39.083  -2.945 -25.590  1.00  0.00           C  
ATOM   2338  O4'  DA A  74     -39.412  -3.232 -24.270  1.00  0.00           O  
ATOM   2339  C3'  DA A  74     -38.567  -1.500 -25.570  7.00  0.00           C  
ATOM   2340  O3'  DA A  74     -39.637  -0.577 -25.550  4.00  0.00           O  
ATOM   2341  C2'  DA A  74     -37.862  -1.432 -24.270  5.00  0.00           C  
ATOM   2342  C1'  DA A  74     -38.655  -2.452 -23.420  8.00  0.00           C  
ATOM   2343  N1   DA A  74     -39.081  -4.705 -18.820  9.00  0.00           N  
ATOM   2344  C2   DA A  74     -39.852  -3.838 -19.440  5.00  0.00           C  
ATOM   2345  N3   DA A  74     -39.738  -3.266 -20.600  0.00  0.00           N  
ATOM   2346  C4   DA A  74     -38.431  -3.488 -21.110  3.00  0.00           C  
ATOM   2347  C5   DA A  74     -37.529  -4.368 -20.580  1.00  0.00           C  
ATOM   2348  C6   DA A  74     -37.904  -5.016 -19.380  8.00  0.00           C  
ATOM   2349  N6   DA A  74     -37.170  -5.791 -18.590  4.00  0.00           N  
ATOM   2350  N7   DA A  74     -36.326  -4.396 -21.390  7.00  0.00           N  
ATOM   2351  C8   DA A  74     -36.606  -3.529 -22.350  9.00  0.00           C  
ATOM   2352  N9   DA A  74     -37.906  -3.085 -22.340  9.00  0.00           N  
ATOM   2353  OP1  DA A  74     -34.835  -5.211 -24.690  2.00  0.00           O  
ATOM   2354  OP2  DA A  74     -36.446  -6.372 -26.220  4.00  0.00           O1-
ATOM   2355  H2   DA A  74     -40.796  -3.540 -18.850  3.00  0.00           H  
ATOM   2356  H8   DA A  74     -35.874  -3.362 -23.140  6.00  0.00           H  
ATOM   2357  H1'  DA A  74     -39.507  -1.883 -22.980  6.00  0.00           H  
ATOM   2358  H2'  DA A  74     -36.778  -1.737 -24.430  0.00  0.00           H  
ATOM   2359  H3'  DA A  74     -37.935  -1.161 -26.370  1.00  0.00           H  
ATOM   2360  H4'  DA A  74     -40.056  -3.041 -26.150  9.00  0.00           H  
ATOM   2361  H5'  DA A  74     -38.580  -4.908 -25.820  2.00  0.00           H  
ATOM   2362  H61  DA A  74     -37.627  -6.228 -17.830  4.00  0.00           H  
ATOM   2363  H62  DA A  74     -36.336  -6.241 -18.980  1.00  0.00           H  
ATOM   2364 H2''  DA A  74     -37.928  -0.436 -23.790  5.00  0.00           H  
ATOM   2365 H5''  DA A  74     -37.958  -3.977 -27.150  9.00  0.00           H  
ATOM   2366  P    DA A  75     -39.560   1.060 -25.440  9.00  0.00           P  
ATOM   2367  C5'  DA A  75     -40.680   1.508 -23.010  8.00  0.00           C  
ATOM   2368  O5'  DA A  75     -39.554   1.297 -23.790  6.00  0.00           O  
ATOM   2369  C4'  DA A  75     -40.262   2.092 -21.670  4.00  0.00           C  
ATOM   2370  O4'  DA A  75     -39.361   1.234 -20.970  6.00  0.00           O  
ATOM   2371  C3'  DA A  75     -39.539   3.491 -21.840  8.00  0.00           C  
ATOM   2372  O3'  DA A  75     -39.982   4.446 -20.840  0.00  0.00           O  
ATOM   2373  C2'  DA A  75     -38.111   3.092 -21.640  2.00  0.00           C  
ATOM   2374  C1'  DA A  75     -38.217   1.954 -20.590  2.00  0.00           C  
ATOM   2375  N1   DA A  75     -35.516  -1.485 -17.720  2.00  0.00           N  
ATOM   2376  C2   DA A  75     -36.751  -0.921 -17.550  6.00  0.00           C  
ATOM   2377  N3   DA A  75     -37.465  -0.092 -18.410  2.00  0.00           N  
ATOM   2378  C4   DA A  75     -36.707   0.189 -19.460  4.00  0.00           C  
ATOM   2379  C5   DA A  75     -35.450  -0.265 -19.710  8.00  0.00           C  
ATOM   2380  C6   DA A  75     -34.825  -1.151 -18.790  8.00  0.00           C  
ATOM   2381  N6   DA A  75     -33.670  -1.752 -19.020  8.00  0.00           N  
ATOM   2382  N7   DA A  75     -35.068   0.189 -21.050  9.00  0.00           N  
ATOM   2383  C8   DA A  75     -36.039   0.952 -21.500  7.00  0.00           C  
ATOM   2384  N9   DA A  75     -37.019   1.054 -20.550  6.00  0.00           N  
ATOM   2385  OP1  DA A  75     -40.705   1.733 -26.140  2.00  0.00           O  
ATOM   2386  OP2  DA A  75     -38.183   1.393 -25.930  8.00  0.00           O1-
ATOM   2387  H2   DA A  75     -37.325  -1.099 -16.680  5.00  0.00           H  
ATOM   2388  H8   DA A  75     -35.998   1.369 -22.470  0.00  0.00           H  
ATOM   2389  H1'  DA A  75     -38.323   2.439 -19.590  9.00  0.00           H  
ATOM   2390  H2'  DA A  75     -37.707   2.667 -22.600  6.00  0.00           H  
ATOM   2391  H3'  DA A  75     -39.737   3.845 -22.830  0.00  0.00           H  
ATOM   2392  H4'  DA A  75     -41.155   2.277 -21.040  4.00  0.00           H  
ATOM   2393  H5'  DA A  75     -41.164   0.519 -22.770  6.00  0.00           H  
ATOM   2394  H61  DA A  75     -33.426  -2.471 -18.320  5.00  0.00           H  
ATOM   2395  H62  DA A  75     -33.183  -1.478 -19.870  4.00  0.00           H  
ATOM   2396 H2''  DA A  75     -37.430   3.857 -21.320  0.00  0.00           H  
ATOM   2397 H5''  DA A  75     -41.436   2.194 -23.470  6.00  0.00           H  
ATOM   2398  P    DC A  76     -40.114   6.045 -21.130  2.00  0.00           P  
ATOM   2399  C5'  DC A  76     -38.151   7.298 -19.890  4.00  0.00           C  
ATOM   2400  O5'  DC A  76     -38.589   6.618 -21.070  8.00  0.00           O  
ATOM   2401  C4'  DC A  76     -36.624   7.458 -19.860  9.00  0.00           C  
ATOM   2402  O4'  DC A  76     -35.884   6.224 -19.900  7.00  0.00           O  
ATOM   2403  C3'  DC A  76     -35.961   8.373 -20.940  9.00  0.00           C  
ATOM   2404  O3'  DC A  76     -36.131   9.751 -20.460  3.00  0.00           O  
ATOM   2405  C2'  DC A  76     -34.502   7.785 -20.830  5.00  0.00           C  
ATOM   2406  C1'  DC A  76     -34.620   6.366 -20.460  3.00  0.00           C  
ATOM   2407  N1   DC A  76     -34.310   5.492 -21.650  0.00  0.00           N  
ATOM   2408  C2   DC A  76     -33.035   4.947 -21.790  6.00  0.00           C  
ATOM   2409  O2   DC A  76     -32.070   5.386 -21.160  9.00  0.00           O  
ATOM   2410  N3   DC A  76     -32.771   4.004 -22.710  5.00  0.00           N  
ATOM   2411  C4   DC A  76     -33.729   3.517 -23.460  3.00  0.00           C  
ATOM   2412  N4   DC A  76     -33.396   2.539 -24.330  9.00  0.00           N  
ATOM   2413  C5   DC A  76     -35.028   4.063 -23.430  9.00  0.00           C  
ATOM   2414  C6   DC A  76     -35.283   5.066 -22.510  1.00  0.00           C  
ATOM   2415  OP1  DC A  76     -41.066   6.616 -20.130  1.00  0.00           O  
ATOM   2416  OP2  DC A  76     -40.499   6.143 -22.600  8.00  0.00           O1-
ATOM   2417  H5   DC A  76     -35.859   3.747 -24.090  5.00  0.00           H  
ATOM   2418  H6   DC A  76     -36.284   5.571 -22.430  2.00  0.00           H  
ATOM   2419  H1'  DC A  76     -33.868   6.126 -19.680  9.00  0.00           H  
ATOM   2420  H2'  DC A  76     -34.020   7.911 -21.760  5.00  0.00           H  
ATOM   2421  H3'  DC A  76     -36.274   8.172 -21.890  9.00  0.00           H  
ATOM   2422  H4'  DC A  76     -36.317   7.869 -18.880  0.00  0.00           H  
ATOM   2423  H41  DC A  76     -32.440   2.156 -24.400  2.00  0.00           H  
ATOM   2424  H5'  DC A  76     -38.269   6.677 -19.020  1.00  0.00           H  
ATOM   2425  H42  DC A  76     -34.087   2.031 -24.820  7.00  0.00           H  
ATOM   2426 H2''  DC A  76     -33.874   8.373 -20.160  4.00  0.00           H  
ATOM   2427 H5''  DC A  76     -38.577   8.309 -19.780  6.00  0.00           H  
ATOM   2428  P    DC A  77     -35.891  10.919 -21.480  3.00  0.00           P  
ATOM   2429  C5'  DC A  77     -33.589  11.766 -20.690  9.00  0.00           C  
ATOM   2430  O5'  DC A  77     -34.346  11.170 -21.690  2.00  0.00           O  
ATOM   2431  C4'  DC A  77     -32.208  12.194 -21.160  4.00  0.00           C  
ATOM   2432  O4'  DC A  77     -31.597  11.095 -21.770  9.00  0.00           O  
ATOM   2433  C3'  DC A  77     -32.175  13.294 -22.240  5.00  0.00           C  
ATOM   2434  O3'  DC A  77     -32.063  14.597 -21.560  5.00  0.00           O  
ATOM   2435  C2'  DC A  77     -30.917  13.015 -23.040  5.00  0.00           C  
ATOM   2436  C1'  DC A  77     -30.785  11.521 -22.900  2.00  0.00           C  
ATOM   2437  N1   DC A  77     -31.290  10.716 -24.050  5.00  0.00           N  
ATOM   2438  C2   DC A  77     -30.371   9.973 -24.800  1.00  0.00           C  
ATOM   2439  O2   DC A  77     -29.209   9.802 -24.370  1.00  0.00           O  
ATOM   2440  N3   DC A  77     -30.681   9.373 -26.000  6.00  0.00           N  
ATOM   2441  C4   DC A  77     -31.925   9.417 -26.440  2.00  0.00           C  
ATOM   2442  N4   DC A  77     -32.198   8.746 -27.580  6.00  0.00           N  
ATOM   2443  C5   DC A  77     -32.924  10.242 -25.720  7.00  0.00           C  
ATOM   2444  C6   DC A  77     -32.554  10.775 -24.520  5.00  0.00           C  
ATOM   2445  OP1  DC A  77     -36.574  12.149 -20.880  6.00  0.00           O  
ATOM   2446  OP2  DC A  77     -36.475  10.482 -22.710  1.00  0.00           O1-
ATOM   2447  H5   DC A  77     -33.944  10.331 -26.090  3.00  0.00           H  
ATOM   2448  H6   DC A  77     -33.285  11.331 -23.880  7.00  0.00           H  
ATOM   2449  H1'  DC A  77     -29.718  11.360 -22.750  0.00  0.00           H  
ATOM   2450  H2'  DC A  77     -30.998  13.313 -24.100  3.00  0.00           H  
ATOM   2451  H3'  DC A  77     -33.053  13.195 -22.830  8.00  0.00           H  
ATOM   2452  H4'  DC A  77     -31.540  12.477 -20.340  8.00  0.00           H  
ATOM   2453  H41  DC A  77     -31.493   8.047 -27.890  4.00  0.00           H  
ATOM   2454  H5'  DC A  77     -33.383  11.049 -19.900  3.00  0.00           H  
ATOM   2455  H42  DC A  77     -33.215   8.665 -27.870  2.00  0.00           H  
ATOM   2456 H2''  DC A  77     -30.128  13.560 -22.520  5.00  0.00           H  
ATOM   2457 H5''  DC A  77     -34.192  12.594 -20.330  0.00  0.00           H  
ATOM   2458  P    DC A  78     -32.534  15.972 -22.360  8.00  0.00           P  
ATOM   2459  C5'  DC A  78     -30.122  16.893 -22.420  8.00  0.00           C  
ATOM   2460  O5'  DC A  78     -31.296  16.486 -23.140  4.00  0.00           O  
ATOM   2461  C4'  DC A  78     -28.904  17.220 -23.380  8.00  0.00           C  
ATOM   2462  O4'  DC A  78     -28.508  16.156 -24.240  4.00  0.00           O  
ATOM   2463  C3'  DC A  78     -29.267  18.391 -24.350  5.00  0.00           C  
ATOM   2464  O3'  DC A  78     -29.097  19.706 -23.790  7.00  0.00           O  
ATOM   2465  C2'  DC A  78     -28.341  18.165 -25.440  1.00  0.00           C  
ATOM   2466  C1'  DC A  78     -27.983  16.669 -25.450  7.00  0.00           C  
ATOM   2467  N1   DC A  78     -28.529  15.995 -26.690  1.00  0.00           N  
ATOM   2468  C2   DC A  78     -27.641  15.265 -27.500  1.00  0.00           C  
ATOM   2469  O2   DC A  78     -26.466  15.008 -27.160  9.00  0.00           O  
ATOM   2470  N3   DC A  78     -28.042  14.870 -28.740  0.00  0.00           N  
ATOM   2471  C4   DC A  78     -29.306  15.127 -29.090  5.00  0.00           C  
ATOM   2472  N4   DC A  78     -29.745  14.665 -30.180  6.00  0.00           N  
ATOM   2473  C5   DC A  78     -30.290  15.799 -28.230  4.00  0.00           C  
ATOM   2474  C6   DC A  78     -29.852  16.131 -27.030  6.00  0.00           C  
ATOM   2475  OP1  DC A  78     -33.078  16.859 -21.290  9.00  0.00           O  
ATOM   2476  OP2  DC A  78     -33.494  15.477 -23.340  4.00  0.00           O1-
ATOM   2477  H5   DC A  78     -31.346  16.004 -28.420  0.00  0.00           H  
ATOM   2478  H6   DC A  78     -30.466  16.604 -26.210  8.00  0.00           H  
ATOM   2479  H1'  DC A  78     -26.898  16.565 -25.370  8.00  0.00           H  
ATOM   2480  H2'  DC A  78     -28.719  18.597 -26.380  8.00  0.00           H  
ATOM   2481  H3'  DC A  78     -30.257  18.297 -24.750  3.00  0.00           H  
ATOM   2482  H4'  DC A  78     -28.009  17.510 -22.800  4.00  0.00           H  
ATOM   2483  H41  DC A  78     -29.339  13.847 -30.620  0.00  0.00           H  
ATOM   2484  H5'  DC A  78     -29.711  16.019 -21.870  9.00  0.00           H  
ATOM   2485  H42  DC A  78     -30.776  14.750 -30.360  7.00  0.00           H  
ATOM   2486 H2''  DC A  78     -27.341  18.590 -25.310  2.00  0.00           H  
ATOM   2487 H5''  DC A  78     -30.298  17.755 -21.850  7.00  0.00           H  
ATOM   2488  P    DT A  79     -29.820  20.925 -24.530  7.00  0.00           P  
ATOM   2489  C5'  DT A  79     -30.467  22.143 -22.270  5.00  0.00           C  
ATOM   2490  O5'  DT A  79     -29.755  22.192 -23.440  6.00  0.00           O  
ATOM   2491  C4'  DT A  79     -30.001  23.250 -21.260  4.00  0.00           C  
ATOM   2492  O4'  DT A  79     -30.298  24.604 -21.600  9.00  0.00           O  
ATOM   2493  C3'  DT A  79     -30.166  22.903 -19.790  8.00  0.00           C  
ATOM   2494  O3'  DT A  79     -28.968  23.143 -19.000  3.00  0.00           O  
ATOM   2495  C2'  DT A  79     -31.232  23.944 -19.550  0.00  0.00           C  
ATOM   2496  C1'  DT A  79     -30.952  25.223 -20.410  5.00  0.00           C  
ATOM   2497  N1   DT A  79     -32.200  25.954 -20.800  3.00  0.00           N  
ATOM   2498  C2   DT A  79     -32.491  27.118 -20.170  0.00  0.00           C  
ATOM   2499  O2   DT A  79     -31.965  27.567 -19.130  2.00  0.00           O  
ATOM   2500  N3   DT A  79     -33.605  27.810 -20.620  2.00  0.00           N  
ATOM   2501  C4   DT A  79     -34.523  27.339 -21.480  7.00  0.00           C  
ATOM   2502  O4   DT A  79     -35.552  27.992 -21.630  6.00  0.00           O  
ATOM   2503  C5   DT A  79     -34.121  26.111 -22.140  5.00  0.00           C  
ATOM   2504  C6   DT A  79     -32.986  25.479 -21.840  9.00  0.00           C  
ATOM   2505  C7   DT A  79     -34.971  25.716 -23.340  8.00  0.00           C  
ATOM   2506  OP1  DT A  79     -28.915  21.301 -25.620  3.00  0.00           O  
ATOM   2507  OP2  DT A  79     -31.277  20.655 -24.910  8.00  0.00           O1-
ATOM   2508  H3   DT A  79     -34.056  28.482 -20.000  3.00  0.00           H  
ATOM   2509  H6   DT A  79     -32.597  24.555 -22.420  5.00  0.00           H  
ATOM   2510  H1'  DT A  79     -30.289  25.859 -19.830  0.00  0.00           H  
ATOM   2511  H2'  DT A  79     -32.221  23.649 -19.850  5.00  0.00           H  
ATOM   2512  H3'  DT A  79     -30.394  21.868 -19.650  9.00  0.00           H  
ATOM   2513  H4'  DT A  79     -28.898  23.185 -21.440  4.00  0.00           H  
ATOM   2514  H5'  DT A  79     -30.308  21.191 -21.750  6.00  0.00           H  
ATOM   2515  H71  DT A  79     -35.937  25.681 -22.960  9.00  0.00           H  
ATOM   2516  H72  DT A  79     -34.840  26.511 -24.030  4.00  0.00           H  
ATOM   2517  H73  DT A  79     -34.628  24.811 -23.970  1.00  0.00           H  
ATOM   2518 H2''  DT A  79     -31.370  24.159 -18.510  9.00  0.00           H  
ATOM   2519 H5''  DT A  79     -31.504  22.207 -22.460  1.00  0.00           H  
ATOM   2520  P    DA A  80     -28.794  22.417 -17.590  6.00  0.00           P  
ATOM   2521  C5'  DA A  80     -29.110  24.629 -16.220  2.00  0.00           C  
ATOM   2522  O5'  DA A  80     -29.628  23.389 -16.570  9.00  0.00           O  
ATOM   2523  C4'  DA A  80     -29.895  25.586 -15.310  5.00  0.00           C  
ATOM   2524  O4'  DA A  80     -31.062  25.979 -16.040  2.00  0.00           O  
ATOM   2525  C3'  DA A  80     -30.451  24.985 -13.970  5.00  0.00           C  
ATOM   2526  O3'  DA A  80     -30.549  26.036 -12.990  6.00  0.00           O  
ATOM   2527  C2'  DA A  80     -31.745  24.343 -14.370  6.00  0.00           C  
ATOM   2528  C1'  DA A  80     -32.226  25.367 -15.430  4.00  0.00           C  
ATOM   2529  N1   DA A  80     -35.926  27.122 -18.460  9.00  0.00           N  
ATOM   2530  C2   DA A  80     -35.126  27.688 -17.500  2.00  0.00           C  
ATOM   2531  N3   DA A  80     -34.150  27.176 -16.810  2.00  0.00           N  
ATOM   2532  C4   DA A  80     -34.064  25.842 -17.120  7.00  0.00           C  
ATOM   2533  C5   DA A  80     -34.808  25.049 -17.970  6.00  0.00           C  
ATOM   2534  C6   DA A  80     -35.776  25.826 -18.690  7.00  0.00           C  
ATOM   2535  N6   DA A  80     -36.524  25.233 -19.560  7.00  0.00           N  
ATOM   2536  N7   DA A  80     -34.366  23.717 -17.930  7.00  0.00           N  
ATOM   2537  C8   DA A  80     -33.356  23.706 -17.090  4.00  0.00           C  
ATOM   2538  N9   DA A  80     -33.229  24.961 -16.440  8.00  0.00           N  
ATOM   2539  OP1  DA A  80     -27.395  22.527 -17.200  9.00  0.00           O  
ATOM   2540  OP2  DA A  80     -29.422  21.045 -17.630  3.00  0.00           O1-
ATOM   2541  H2   DA A  80     -35.271  28.748 -17.330  9.00  0.00           H  
ATOM   2542  H8   DA A  80     -32.721  22.815 -16.940  1.00  0.00           H  
ATOM   2543  H1'  DA A  80     -32.855  26.039 -14.890  8.00  0.00           H  
ATOM   2544  H2'  DA A  80     -31.451  23.425 -14.910  8.00  0.00           H  
ATOM   2545  H3'  DA A  80     -29.834  24.201 -13.590  2.00  0.00           H  
ATOM   2546  H4'  DA A  80     -29.326  26.481 -15.000  9.00  0.00           H  
ATOM   2547  H5'  DA A  80     -29.042  25.145 -17.200  3.00  0.00           H  
ATOM   2548  H61  DA A  80     -37.459  25.547 -19.830  0.00  0.00           H  
ATOM   2549  H62  DA A  80     -36.247  24.354 -19.880  5.00  0.00           H  
ATOM   2550 H2''  DA A  80     -32.381  24.078 -13.500  2.00  0.00           H  
ATOM   2551 H5''  DA A  80     -28.088  24.515 -15.860  5.00  0.00           H  
ATOM   2552  P    DA A  81     -30.551  25.631 -11.390  4.00  0.00           P  
ATOM   2553  C5'  DA A  81     -31.058  28.143 -10.750  5.00  0.00           C  
ATOM   2554  O5'  DA A  81     -31.497  26.790 -10.740  4.00  0.00           O  
ATOM   2555  C4'  DA A  81     -32.269  29.106 -10.720  9.00  0.00           C  
ATOM   2556  O4'  DA A  81     -33.084  29.055 -11.900  9.00  0.00           O  
ATOM   2557  C3'  DA A  81     -33.240  29.030  -9.420  5.00  0.00           C  
ATOM   2558  O3'  DA A  81     -33.799  30.306  -9.120  5.00  0.00           O  
ATOM   2559  C2'  DA A  81     -34.261  28.198 -10.030  3.00  0.00           C  
ATOM   2560  C1'  DA A  81     -34.384  28.603 -11.490  6.00  0.00           C  
ATOM   2561  N1   DA A  81     -37.533  27.526 -15.380  0.00  0.00           N  
ATOM   2562  C2   DA A  81     -37.320  28.612 -14.670  2.00  0.00           C  
ATOM   2563  N3   DA A  81     -36.443  28.754 -13.680  6.00  0.00           N  
ATOM   2564  C4   DA A  81     -35.771  27.656 -13.390  6.00  0.00           C  
ATOM   2565  C5   DA A  81     -35.873  26.426 -13.980  3.00  0.00           C  
ATOM   2566  C6   DA A  81     -36.823  26.425 -15.030  9.00  0.00           C  
ATOM   2567  N6   DA A  81     -37.151  25.252 -15.630  5.00  0.00           N  
ATOM   2568  N7   DA A  81     -35.045  25.459 -13.270  4.00  0.00           N  
ATOM   2569  C8   DA A  81     -34.484  26.194 -12.310  3.00  0.00           C  
ATOM   2570  N9   DA A  81     -34.864  27.505 -12.360  6.00  0.00           N  
ATOM   2571  OP1  DA A  81     -29.220  25.910 -10.850  5.00  0.00           O  
ATOM   2572  OP2  DA A  81     -31.224  24.349 -11.200  6.00  0.00           O1-
ATOM   2573  H2   DA A  81     -37.840  29.514 -15.040  5.00  0.00           H  
ATOM   2574  H8   DA A  81     -33.738  25.747 -11.580  6.00  0.00           H  
ATOM   2575  H1'  DA A  81     -35.093  29.424 -11.530  2.00  0.00           H  
ATOM   2576  H2'  DA A  81     -33.874  27.198 -10.050  0.00  0.00           H  
ATOM   2577  H3'  DA A  81     -32.799  28.502  -8.570  4.00  0.00           H  
ATOM   2578  H4'  DA A  81     -31.807  30.129 -10.710  7.00  0.00           H  
ATOM   2579  H5'  DA A  81     -30.673  28.286 -11.760  4.00  0.00           H  
ATOM   2580  H61  DA A  81     -37.730  25.309 -16.430  6.00  0.00           H  
ATOM   2581  H62  DA A  81     -36.646  24.382 -15.310  8.00  0.00           H  
ATOM   2582 H2''  DA A  81     -35.202  28.155  -9.440  8.00  0.00           H  
ATOM   2583 H5''  DA A  81     -30.280  28.417 -10.010  2.00  0.00           H  
ATOM   2584  P    DC A  82     -34.615  30.554  -7.750  8.00  0.00           P  
ATOM   2585  C5'  DC A  82     -36.996  31.360  -8.560  2.00  0.00           C  
ATOM   2586  O5'  DC A  82     -36.168  30.275  -8.080  6.00  0.00           O  
ATOM   2587  C4'  DC A  82     -38.252  30.723  -9.100  0.00  0.00           C  
ATOM   2588  O4'  DC A  82     -37.967  29.682  -9.950  0.00  0.00           O  
ATOM   2589  C3'  DC A  82     -39.188  30.131  -8.020  9.00  0.00           C  
ATOM   2590  O3'  DC A  82     -40.423  30.881  -8.090  2.00  0.00           O  
ATOM   2591  C2'  DC A  82     -39.468  28.675  -8.440  5.00  0.00           C  
ATOM   2592  C1'  DC A  82     -39.097  28.858  -9.930  6.00  0.00           C  
ATOM   2593  N1   DC A  82     -38.708  27.578 -10.610  4.00  0.00           N  
ATOM   2594  C2   DC A  82     -39.442  27.091 -11.680  3.00  0.00           C  
ATOM   2595  O2   DC A  82     -40.377  27.786 -12.140  5.00  0.00           O  
ATOM   2596  N3   DC A  82     -39.101  25.926 -12.330  9.00  0.00           N  
ATOM   2597  C4   DC A  82     -38.086  25.207 -11.960  1.00  0.00           C  
ATOM   2598  N4   DC A  82     -37.786  24.161 -12.710  7.00  0.00           N  
ATOM   2599  C5   DC A  82     -37.376  25.613 -10.810  8.00  0.00           C  
ATOM   2600  C6   DC A  82     -37.682  26.773 -10.200  7.00  0.00           C  
ATOM   2601  OP1  DC A  82     -34.529  31.968  -7.390  4.00  0.00           O  
ATOM   2602  OP2  DC A  82     -34.158  29.617  -6.730  6.00  0.00           O1-
ATOM   2603  H5   DC A  82     -36.569  25.060 -10.350  4.00  0.00           H  
ATOM   2604  H6   DC A  82     -37.076  27.080  -9.330  3.00  0.00           H  
ATOM   2605  H1'  DC A  82     -39.871  29.384 -10.500  0.00  0.00           H  
ATOM   2606  H2'  DC A  82     -38.787  28.037  -7.880  7.00  0.00           H  
ATOM   2607  H3'  DC A  82     -38.869  30.059  -7.060  5.00  0.00           H  
ATOM   2608  H4'  DC A  82     -38.836  31.455  -9.690  2.00  0.00           H  
ATOM   2609  H41  DC A  82     -38.501  23.907 -13.410  2.00  0.00           H  
ATOM   2610  H5'  DC A  82     -36.554  31.843  -9.430  3.00  0.00           H  
ATOM   2611  H42  DC A  82     -37.152  23.517 -12.430  5.00  0.00           H  
ATOM   2612 H2''  DC A  82     -40.556  28.421  -8.420  1.00  0.00           H  
ATOM   2613 H5''  DC A  82     -37.336  32.075  -7.810  2.00  0.00           H  
ATOM   2614  P    DC A  83     -41.818  30.519  -7.310  7.00  0.00           P  
ATOM   2615  C5'  DC A  83     -43.303  30.247  -9.470  9.00  0.00           C  
ATOM   2616  O5'  DC A  83     -42.791  29.636  -8.310  9.00  0.00           O  
ATOM   2617  C4'  DC A  83     -44.278  29.301 -10.170  5.00  0.00           C  
ATOM   2618  O4'  DC A  83     -43.499  28.172 -10.730  9.00  0.00           O  
ATOM   2619  C3'  DC A  83     -45.447  28.626  -9.340  3.00  0.00           C  
ATOM   2620  O3'  DC A  83     -46.658  28.498 -10.050  5.00  0.00           O  
ATOM   2621  C2'  DC A  83     -44.892  27.266  -9.040  1.00  0.00           C  
ATOM   2622  C1'  DC A  83     -44.259  27.025 -10.390  7.00  0.00           C  
ATOM   2623  N1   DC A  83     -43.167  25.946 -10.410  8.00  0.00           N  
ATOM   2624  C2   DC A  83     -43.365  24.732 -11.210  7.00  0.00           C  
ATOM   2625  O2   DC A  83     -44.407  24.611 -11.900  0.00  0.00           O  
ATOM   2626  N3   DC A  83     -42.437  23.724 -11.260  5.00  0.00           N  
ATOM   2627  C4   DC A  83     -41.297  24.004 -10.660  3.00  0.00           C  
ATOM   2628  N4   DC A  83     -40.332  23.121 -10.940  7.00  0.00           N  
ATOM   2629  C5   DC A  83     -41.050  25.086  -9.820  5.00  0.00           C  
ATOM   2630  C6   DC A  83     -42.014  26.036  -9.700  2.00  0.00           C  
ATOM   2631  OP1  DC A  83     -42.513  31.745  -6.910  4.00  0.00           O  
ATOM   2632  OP2  DC A  83     -41.480  29.622  -6.150  4.00  0.00           O1-
ATOM   2633  H5   DC A  83     -40.147  25.144  -9.270  5.00  0.00           H  
ATOM   2634  H6   DC A  83     -41.937  26.882  -9.060  5.00  0.00           H  
ATOM   2635  H1'  DC A  83     -44.905  26.963 -11.240  5.00  0.00           H  
ATOM   2636  H2'  DC A  83     -44.165  27.315  -8.270  1.00  0.00           H  
ATOM   2637  H3'  DC A  83     -45.541  29.110  -8.380  1.00  0.00           H  
ATOM   2638  H4'  DC A  83     -44.729  29.874 -11.000  3.00  0.00           H  
ATOM   2639  H41  DC A  83     -40.604  22.371 -11.600  7.00  0.00           H  
ATOM   2640  H5'  DC A  83     -42.422  30.585 -10.060  3.00  0.00           H  
ATOM   2641  H42  DC A  83     -39.368  23.241 -10.620  5.00  0.00           H  
ATOM   2642 H2''  DC A  83     -45.756  26.668  -8.800  2.00  0.00           H  
ATOM   2643 H5''  DC A  83     -43.780  31.167  -9.340  3.00  0.00           H  
ATOM   2644  P    DC A  84     -47.983  28.235  -9.360  3.00  0.00           P  
ATOM   2645  C5'  DC A  84     -48.608  26.378 -11.120  9.00  0.00           C  
ATOM   2646  O5'  DC A  84     -48.243  26.722  -9.810  9.00  0.00           O  
ATOM   2647  C4'  DC A  84     -48.733  24.845 -11.380  3.00  0.00           C  
ATOM   2648  O4'  DC A  84     -47.562  24.140 -11.090  8.00  0.00           O  
ATOM   2649  C3'  DC A  84     -49.829  24.068 -10.610  5.00  0.00           C  
ATOM   2650  O3'  DC A  84     -50.909  23.898 -11.500  0.00  0.00           O  
ATOM   2651  C2'  DC A  84     -49.143  22.803 -10.170  9.00  0.00           C  
ATOM   2652  C1'  DC A  84     -47.837  22.747 -11.090  0.00  0.00           C  
ATOM   2653  N1   DC A  84     -46.678  21.997 -10.570  8.00  0.00           N  
ATOM   2654  C2   DC A  84     -46.314  20.782 -11.220  2.00  0.00           C  
ATOM   2655  O2   DC A  84     -46.978  20.255 -12.090  7.00  0.00           O  
ATOM   2656  N3   DC A  84     -45.252  20.108 -10.820  9.00  0.00           N  
ATOM   2657  C4   DC A  84     -44.537  20.637  -9.830  2.00  0.00           C  
ATOM   2658  N4   DC A  84     -43.484  20.073  -9.420  3.00  0.00           N  
ATOM   2659  C5   DC A  84     -44.910  21.829  -9.150  7.00  0.00           C  
ATOM   2660  C6   DC A  84     -46.063  22.447  -9.430  6.00  0.00           C  
ATOM   2661  OP1  DC A  84     -49.107  29.083  -9.940  7.00  0.00           O  
ATOM   2662  OP2  DC A  84     -47.801  28.326  -7.870  6.00  0.00           O1-
ATOM   2663  H5   DC A  84     -44.320  22.270  -8.360  5.00  0.00           H  
ATOM   2664  H6   DC A  84     -46.317  23.440  -9.040  2.00  0.00           H  
ATOM   2665  H1'  DC A  84     -48.127  22.261 -12.020  1.00  0.00           H  
ATOM   2666  H2'  DC A  84     -48.854  22.874  -9.100  3.00  0.00           H  
ATOM   2667  H3'  DC A  84     -49.962  24.799  -9.830  1.00  0.00           H  
ATOM   2668  H4'  DC A  84     -48.931  24.693 -12.420  5.00  0.00           H  
ATOM   2669  H41  DC A  84     -43.096  19.326  -9.930  6.00  0.00           H  
ATOM   2670  H5'  DC A  84     -47.831  26.828 -11.830  2.00  0.00           H  
ATOM   2671  H42  DC A  84     -43.001  20.537  -8.680  0.00  0.00           H  
ATOM   2672 H2''  DC A  84     -49.773  21.979 -10.250  4.00  0.00           H  
ATOM   2673 H5''  DC A  84     -49.561  26.830 -11.470  9.00  0.00           H  
ATOM   2674  P    DT A  85     -52.324  23.628 -10.970  2.00  0.00           P  
ATOM   2675  C5'  DT A  85     -52.139  21.278 -12.360  6.00  0.00           C  
ATOM   2676  O5'  DT A  85     -52.600  21.979 -11.140  2.00  0.00           O  
ATOM   2677  C4'  DT A  85     -51.517  19.896 -12.340  0.00  0.00           C  
ATOM   2678  O4'  DT A  85     -50.231  19.798 -11.790  0.00  0.00           O  
ATOM   2679  C3'  DT A  85     -52.378  18.685 -11.850  6.00  0.00           C  
ATOM   2680  O3'  DT A  85     -52.519  17.667 -12.720  0.00  0.00           O  
ATOM   2681  C2'  DT A  85     -51.472  18.206 -10.690  2.00  0.00           C  
ATOM   2682  C1'  DT A  85     -50.087  18.464 -11.250  6.00  0.00           C  
ATOM   2683  N1   DT A  85     -48.957  18.486 -10.240  9.00  0.00           N  
ATOM   2684  C2   DT A  85     -47.914  17.556 -10.450  4.00  0.00           C  
ATOM   2685  O2   DT A  85     -47.867  16.717 -11.330  2.00  0.00           O  
ATOM   2686  N3   DT A  85     -46.764  17.734  -9.700  8.00  0.00           N  
ATOM   2687  C4   DT A  85     -46.829  18.349  -8.480  2.00  0.00           C  
ATOM   2688  O4   DT A  85     -45.928  18.288  -7.660  0.00  0.00           O  
ATOM   2689  C5   DT A  85     -48.042  19.060  -8.160  3.00  0.00           C  
ATOM   2690  C6   DT A  85     -49.069  19.133  -9.050  2.00  0.00           C  
ATOM   2691  C7   DT A  85     -48.114  19.943  -6.880  8.00  0.00           C  
ATOM   2692  OP1  DT A  85     -53.229  24.253 -11.970  6.00  0.00           O  
ATOM   2693  OP2  DT A  85     -52.383  24.072  -9.560  1.00  0.00           O1-
ATOM   2694  H3   DT A  85     -46.013  17.087  -9.840  2.00  0.00           H  
ATOM   2695  H6   DT A  85     -49.991  19.821  -8.850  3.00  0.00           H  
ATOM   2696  H1'  DT A  85     -49.829  17.726 -12.100  0.00  0.00           H  
ATOM   2697  H2'  DT A  85     -51.658  18.797  -9.760  4.00  0.00           H  
ATOM   2698  H3'  DT A  85     -53.362  19.048 -11.400  6.00  0.00           H  
ATOM   2699  H4'  DT A  85     -51.322  19.715 -13.410  4.00  0.00           H  
ATOM   2700  H5'  DT A  85     -51.378  21.851 -12.910  6.00  0.00           H  
ATOM   2701  H71  DT A  85     -47.593  19.438  -6.060  8.00  0.00           H  
ATOM   2702  H72  DT A  85     -47.548  20.839  -7.070  3.00  0.00           H  
ATOM   2703  H73  DT A  85     -49.173  20.205  -6.710  1.00  0.00           H  
ATOM   2704 H2''  DT A  85     -51.559  17.151 -10.430  1.00  0.00           H  
ATOM   2705 H5''  DT A  85     -53.002  21.221 -13.080  0.00  0.00           H  
ATOM   2706  P    DA A  86     -53.409  16.416 -12.480  0.00  0.00           P  
ATOM   2707  C5'  DA A  86     -51.431  14.874 -13.340  0.00  0.00           C  
ATOM   2708  O5'  DA A  86     -52.356  15.188 -12.280  2.00  0.00           O  
ATOM   2709  C4'  DA A  86     -50.588  13.581 -13.060  4.00  0.00           C  
ATOM   2710  O4'  DA A  86     -49.442  13.828 -12.280  3.00  0.00           O  
ATOM   2711  C3'  DA A  86     -51.247  12.359 -12.450  5.00  0.00           C  
ATOM   2712  O3'  DA A  86     -50.875  11.183 -13.170  8.00  0.00           O  
ATOM   2713  C2'  DA A  86     -50.844  12.483 -11.000  4.00  0.00           C  
ATOM   2714  C1'  DA A  86     -49.430  13.056 -11.120  2.00  0.00           C  
ATOM   2715  N1   DA A  86     -45.610  13.738  -7.880  8.00  0.00           N  
ATOM   2716  C2   DA A  86     -45.785  12.840  -8.830  0.00  0.00           C  
ATOM   2717  N3   DA A  86     -46.854  12.783  -9.590  5.00  0.00           N  
ATOM   2718  C4   DA A  86     -47.778  13.775  -9.330  0.00  0.00           C  
ATOM   2719  C5   DA A  86     -47.724  14.715  -8.360  8.00  0.00           C  
ATOM   2720  C6   DA A  86     -46.524  14.703  -7.660  5.00  0.00           C  
ATOM   2721  N6   DA A  86     -46.263  15.422  -6.580  1.00  0.00           N  
ATOM   2722  N7   DA A  86     -48.916  15.477  -8.370  0.00  0.00           N  
ATOM   2723  C8   DA A  86     -49.677  14.887  -9.290  4.00  0.00           C  
ATOM   2724  N9   DA A  86     -49.022  13.878  -9.980  7.00  0.00           N  
ATOM   2725  OP1  DA A  86     -54.111  16.118 -13.740  8.00  0.00           O  
ATOM   2726  OP2  DA A  86     -54.162  16.649 -11.190  4.00  0.00           O1-
ATOM   2727  H2   DA A  86     -44.922  12.167  -9.040  8.00  0.00           H  
ATOM   2728  H8   DA A  86     -50.651  15.281  -9.500  3.00  0.00           H  
ATOM   2729  H1'  DA A  86     -48.723  12.205 -11.160  6.00  0.00           H  
ATOM   2730  H2'  DA A  86     -51.407  13.211 -10.420  6.00  0.00           H  
ATOM   2731  H3'  DA A  86     -52.278  12.394 -12.630  4.00  0.00           H  
ATOM   2732  H4'  DA A  86     -50.174  13.266 -14.080  1.00  0.00           H  
ATOM   2733  H5'  DA A  86     -50.766  15.711 -13.520  8.00  0.00           H  
ATOM   2734  H61  DA A  86     -45.459  15.187  -6.040  2.00  0.00           H  
ATOM   2735  H62  DA A  86     -46.967  16.168  -6.330  4.00  0.00           H  
ATOM   2736 H2''  DA A  86     -50.869  11.533 -10.480  2.00  0.00           H  
ATOM   2737 H5''  DA A  86     -51.898  14.730 -14.320  6.00  0.00           H  
ATOM   2738  P    DA A  87     -51.647   9.788 -12.950  1.00  0.00           P  
ATOM   2739  C5'  DA A  87     -49.715   8.589 -11.500  1.00  0.00           C  
ATOM   2740  O5'  DA A  87     -51.010   9.203 -11.540  2.00  0.00           O  
ATOM   2741  C4'  DA A  87     -48.992   8.376 -10.170  1.00  0.00           C  
ATOM   2742  O4'  DA A  87     -48.480   9.594  -9.640  9.00  0.00           O  
ATOM   2743  C3'  DA A  87     -49.783   7.650  -9.080  9.00  0.00           C  
ATOM   2744  O3'  DA A  87     -48.925   6.704  -8.390  3.00  0.00           O  
ATOM   2745  C2'  DA A  87     -49.972   8.784  -8.100  5.00  0.00           C  
ATOM   2746  C1'  DA A  87     -48.606   9.543  -8.240  2.00  0.00           C  
ATOM   2747  N1   DA A  87     -45.864  11.808  -4.550  2.00  0.00           N  
ATOM   2748  C2   DA A  87     -45.651  10.742  -5.320  8.00  0.00           C  
ATOM   2749  N3   DA A  87     -46.429  10.259  -6.320  3.00  0.00           N  
ATOM   2750  C4   DA A  87     -47.585  10.943  -6.480  4.00  0.00           C  
ATOM   2751  C5   DA A  87     -47.942  12.063  -5.770  6.00  0.00           C  
ATOM   2752  C6   DA A  87     -47.044  12.405  -4.710  7.00  0.00           C  
ATOM   2753  N6   DA A  87     -47.270  13.407  -3.880  4.00  0.00           N  
ATOM   2754  N7   DA A  87     -49.198  12.559  -6.200  7.00  0.00           N  
ATOM   2755  C8   DA A  87     -49.507  11.759  -7.160  7.00  0.00           C  
ATOM   2756  N9   DA A  87     -48.566  10.802  -7.460  8.00  0.00           N  
ATOM   2757  OP1  DA A  87     -51.210   8.904 -14.020  7.00  0.00           O  
ATOM   2758  OP2  DA A  87     -53.127  10.062 -12.730  2.00  0.00           O1-
ATOM   2759  H2   DA A  87     -44.684  10.318  -5.100  5.00  0.00           H  
ATOM   2760  H8   DA A  87     -50.448  11.986  -7.640  4.00  0.00           H  
ATOM   2761  H1'  DA A  87     -47.846   8.921  -7.800  7.00  0.00           H  
ATOM   2762  H2'  DA A  87     -50.737   9.346  -8.420  8.00  0.00           H  
ATOM   2763  H3'  DA A  87     -50.755   7.216  -9.370  5.00  0.00           H  
ATOM   2764  H4'  DA A  87     -48.161   7.657 -10.330  6.00  0.00           H  
ATOM   2765  H5'  DA A  87     -49.053   9.054 -12.230  4.00  0.00           H  
ATOM   2766  H61  DA A  87     -46.583  13.548  -3.110  6.00  0.00           H  
ATOM   2767  H62  DA A  87     -48.054  14.034  -4.010  6.00  0.00           H  
ATOM   2768 H2''  DA A  87     -50.169   8.478  -7.030  3.00  0.00           H  
ATOM   2769 H5''  DA A  87     -49.919   7.514 -11.700  7.00  0.00           H  
ATOM   2770  P    DC A  88     -48.900   5.152  -8.740  8.00  0.00           P  
ATOM   2771  C5'  DC A  88     -46.354   4.992  -8.890  0.00  0.00           C  
ATOM   2772  O5'  DC A  88     -47.518   4.630  -8.150  6.00  0.00           O  
ATOM   2773  C4'  DC A  88     -45.036   4.919  -8.150  3.00  0.00           C  
ATOM   2774  O4'  DC A  88     -45.134   6.074  -7.240  5.00  0.00           O  
ATOM   2775  C3'  DC A  88     -44.856   3.666  -7.240  2.00  0.00           C  
ATOM   2776  O3'  DC A  88     -43.500   3.314  -7.070  8.00  0.00           O  
ATOM   2777  C2'  DC A  88     -45.491   4.160  -5.890  3.00  0.00           C  
ATOM   2778  C1'  DC A  88     -45.121   5.619  -5.880  3.00  0.00           C  
ATOM   2779  N1   DC A  88     -46.008   6.526  -5.050  4.00  0.00           N  
ATOM   2780  C2   DC A  88     -45.469   7.279  -3.980  3.00  0.00           C  
ATOM   2781  O2   DC A  88     -44.275   7.109  -3.730  9.00  0.00           O  
ATOM   2782  N3   DC A  88     -46.217   8.235  -3.470  7.00  0.00           N  
ATOM   2783  C4   DC A  88     -47.501   8.370  -3.830  3.00  0.00           C  
ATOM   2784  N4   DC A  88     -48.227   9.388  -3.340  4.00  0.00           N  
ATOM   2785  C5   DC A  88     -48.140   7.534  -4.790  1.00  0.00           C  
ATOM   2786  C6   DC A  88     -47.359   6.574  -5.320  0.00  0.00           C  
ATOM   2787  OP1  DC A  88     -48.848   4.998 -10.200  7.00  0.00           O  
ATOM   2788  OP2  DC A  88     -49.983   4.459  -7.980  4.00  0.00           O1-
ATOM   2789  H5   DC A  88     -49.222   7.629  -5.030  3.00  0.00           H  
ATOM   2790  H6   DC A  88     -47.836   5.986  -6.150  4.00  0.00           H  
ATOM   2791  H1'  DC A  88     -44.133   5.714  -5.530  3.00  0.00           H  
ATOM   2792  H2'  DC A  88     -46.597   4.040  -5.990  8.00  0.00           H  
ATOM   2793  H3'  DC A  88     -45.430   2.883  -7.650  5.00  0.00           H  
ATOM   2794  H4'  DC A  88     -44.144   5.024  -8.820  3.00  0.00           H  
ATOM   2795  H41  DC A  88     -47.789  10.008  -2.660  6.00  0.00           H  
ATOM   2796  H5'  DC A  88     -46.417   6.029  -9.180  9.00  0.00           H  
ATOM   2797  H42  DC A  88     -49.259   9.413  -3.580  4.00  0.00           H  
ATOM   2798 H2''  DC A  88     -45.165   3.653  -5.040  7.00  0.00           H  
ATOM   2799 H5''  DC A  88     -46.310   4.326  -9.790  2.00  0.00           H  
ATOM   2800  P    DC A  89     -43.022   1.861  -6.590  4.00  0.00           P  
ATOM   2801  C5'  DC A  89     -42.529   2.136  -4.020  9.00  0.00           C  
ATOM   2802  O5'  DC A  89     -43.363   1.789  -5.070  0.00  0.00           O  
ATOM   2803  C4'  DC A  89     -43.149   2.312  -2.580  1.00  0.00           C  
ATOM   2804  O4'  DC A  89     -44.206   3.322  -2.520  2.00  0.00           O  
ATOM   2805  C3'  DC A  89     -43.678   0.946  -1.970  7.00  0.00           C  
ATOM   2806  O3'  DC A  89     -43.193   0.783  -0.670  4.00  0.00           O  
ATOM   2807  C2'  DC A  89     -45.198   1.341  -1.890  7.00  0.00           C  
ATOM   2808  C1'  DC A  89     -45.211   2.829  -1.650  5.00  0.00           C  
ATOM   2809  N1   DC A  89     -46.479   3.532  -1.980  8.00  0.00           N  
ATOM   2810  C2   DC A  89     -46.753   4.701  -1.180  5.00  0.00           C  
ATOM   2811  O2   DC A  89     -46.002   5.196  -0.360  3.00  0.00           O  
ATOM   2812  N3   DC A  89     -47.881   5.420  -1.370  1.00  0.00           N  
ATOM   2813  C4   DC A  89     -48.651   5.157  -2.410  9.00  0.00           C  
ATOM   2814  N4   DC A  89     -49.738   5.872  -2.450  2.00  0.00           N  
ATOM   2815  C5   DC A  89     -48.413   3.993  -3.250  6.00  0.00           C  
ATOM   2816  C6   DC A  89     -47.385   3.137  -2.930  6.00  0.00           C  
ATOM   2817  OP1  DC A  89     -41.543   1.797  -6.740  9.00  0.00           O  
ATOM   2818  OP2  DC A  89     -43.836   0.879  -7.360  9.00  0.00           O1-
ATOM   2819  H5   DC A  89     -49.025   3.697  -4.080  4.00  0.00           H  
ATOM   2820  H6   DC A  89     -47.210   2.179  -3.520  8.00  0.00           H  
ATOM   2821  H1'  DC A  89     -44.903   3.017  -0.570  9.00  0.00           H  
ATOM   2822  H2'  DC A  89     -45.696   1.121  -2.780  2.00  0.00           H  
ATOM   2823  H3'  DC A  89     -43.406   0.149  -2.680  6.00  0.00           H  
ATOM   2824  H4'  DC A  89     -42.336   2.774  -1.920  0.00  0.00           H  
ATOM   2825  H41  DC A  89     -49.996   6.325  -1.540  1.00  0.00           H  
ATOM   2826  H5'  DC A  89     -42.033   3.059  -4.250  8.00  0.00           H  
ATOM   2827  H42  DC A  89     -50.447   5.545  -3.060  7.00  0.00           H  
ATOM   2828 H2''  DC A  89     -45.648   0.835  -1.060  2.00  0.00           H  
ATOM   2829 H5''  DC A  89     -41.754   1.411  -3.910  9.00  0.00           H  
ATOM   2830  P   DC3 A  90     -43.400  -0.598   0.080  0.00  0.00           P  
ATOM   2831  C5' DC3 A  90     -44.853  -0.073   2.230  2.00  0.00           C  
ATOM   2832  O5' DC3 A  90     -44.830  -0.473   0.840  1.00  0.00           O  
ATOM   2833  C4' DC3 A  90     -44.366   1.316   2.620  3.00  0.00           C  
ATOM   2834  O4' DC3 A  90     -44.994   2.280   1.730  1.00  0.00           O  
ATOM   2835  C3' DC3 A  90     -44.792   1.540   4.100  1.00  0.00           C  
ATOM   2836  O3' DC3 A  90     -43.914   2.456   4.780  3.00  0.00           O  
ATOM   2837  C2' DC3 A  90     -46.091   2.360   3.840  2.00  0.00           C  
ATOM   2838  C1' DC3 A  90     -45.876   3.041   2.540  6.00  0.00           C  
ATOM   2839  N1  DC3 A  90     -47.172   3.171   1.810  2.00  0.00           N  
ATOM   2840  C2  DC3 A  90     -48.060   4.228   2.160  6.00  0.00           C  
ATOM   2841  O2  DC3 A  90     -47.833   5.050   3.060  2.00  0.00           O  
ATOM   2842  N3  DC3 A  90     -49.116   4.393   1.380  0.00  0.00           N  
ATOM   2843  C4  DC3 A  90     -49.445   3.525   0.400  7.00  0.00           C  
ATOM   2844  N4  DC3 A  90     -50.574   3.622  -0.210  2.00  0.00           N  
ATOM   2845  C5  DC3 A  90     -48.625   2.441   0.020  7.00  0.00           C  
ATOM   2846  C6  DC3 A  90     -47.531   2.251   0.790  1.00  0.00           C  
ATOM   2847  OP1 DC3 A  90     -42.450  -0.748   1.210  9.00  0.00           O  
ATOM   2848  OP2 DC3 A  90     -43.646  -1.658  -0.920  2.00  0.00           O  
ATOM   2849 HO3' DC3 A  90     -43.957   2.316   5.790  9.00  0.00           H  
ATOM   2850  H5  DC3 A  90     -48.873   1.713  -0.750  3.00  0.00           H  
ATOM   2851  H6  DC3 A  90     -46.902   1.406   0.540  3.00  0.00           H  
ATOM   2852  H1' DC3 A  90     -45.508   4.031   2.720  9.00  0.00           H  
ATOM   2853  H2' DC3 A  90     -46.957   1.713   3.880  7.00  0.00           H  
ATOM   2854  H3' DC3 A  90     -44.942   0.656   4.730  5.00  0.00           H  
ATOM   2855  H4' DC3 A  90     -43.268   1.241   2.500  4.00  0.00           H  
ATOM   2856  H41 DC3 A  90     -51.161   4.366   0.150  6.00  0.00           H  
ATOM   2857  H5' DC3 A  90     -44.212  -0.705   2.850  8.00  0.00           H  
ATOM   2858  H42 DC3 A  90     -50.892   2.996  -0.990  8.00  0.00           H  
ATOM   2859 H2'' DC3 A  90     -46.250   3.008   4.720  6.00  0.00           H  
ATOM   2860 H5'' DC3 A  90     -45.908  -0.277   2.490  4.00  0.00           H  
ATOM   2861  Na+ NA+ A  91     -26.417  35.755 -20.300  3.00  0.00           N  
ATOM   2862  Na+ NA+ A  91     -25.934  39.125 -22.490  1.00  0.00           N  
ATOM   2863  Na+ NA+ A  91     -25.441  42.210 -23.440  1.00  0.00           N  
ATOM   3171  C   CNT A 208     -39.043 -21.276  -2.890  5.00  0.00           C  
ATOM   3172  C   CNT A 208     -38.644 -19.997  -3.340  4.00  0.00           C  
ATOM   3173  C   CNT A 208     -39.320 -18.878  -2.780  1.00  0.00           C  
ATOM   3174  C   CNT A 208     -39.051 -17.567  -3.220  5.00  0.00           C  
ATOM   3175  C   CNT A 208     -37.635 -19.675  -4.260  2.00  0.00           C  
ATOM   3176  C   CNT A 208     -37.811 -18.552  -5.130  6.00  0.00           C  
ATOM   3177  C   CNT A 208     -38.504 -17.451  -4.560  9.00  0.00           C  
ATOM   3178  C   CNT A 208     -39.028 -16.407  -5.410  7.00  0.00           C  
ATOM   3179  C   CNT A 208     -37.575 -18.416  -6.540  6.00  0.00           C  
ATOM   3180  C   CNT A 208     -38.490 -17.703  -7.390  2.00  0.00           C  
ATOM   3181  C   CNT A 208     -39.189 -16.677  -6.770  4.00  0.00           C  
ATOM   3182  C   CNT A 208     -40.329 -16.151  -7.360  2.00  0.00           C  
ATOM   3183  C   CNT A 208     -38.971 -18.065  -8.680  4.00  0.00           C  
ATOM   3184  C   CNT A 208     -40.354 -17.878  -9.080  0.00  0.00           C  
ATOM   3185  C   CNT A 208     -41.003 -16.888  -8.350  5.00  0.00           C  
ATOM   3186  C   CNT A 208     -42.433 -16.721  -8.520  3.00  0.00           C  
ATOM   3187  C   CNT A 208     -41.160 -18.813  -9.820  2.00  0.00           C  
ATOM   3188  C   CNT A 208     -42.507 -18.995  -9.520  4.00  0.00           C  
ATOM   3189  C   CNT A 208     -43.135 -17.879  -8.890  7.00  0.00           C  
ATOM   3190  C   CNT A 208     -44.424 -18.040  -8.290  4.00  0.00           C  
ATOM   3191  C   CNT A 208     -43.296 -20.174  -9.630  2.00  0.00           C  
ATOM   3192  C   CNT A 208     -44.253 -20.483  -8.630  7.00  0.00           C  
ATOM   3193  C   CNT A 208     -44.928 -19.376  -8.040  4.00  0.00           C  
ATOM   3194  C   CNT A 208     -45.710 -19.539  -6.880  4.00  0.00           C  
ATOM   3195  C   CNT A 208     -44.642 -21.734  -8.090  3.00  0.00           C  
ATOM   3196  C   CNT A 208     -45.146 -21.931  -6.780  8.00  0.00           C  
ATOM   3197  C   CNT A 208     -45.694 -20.759  -6.190  8.00  0.00           C  
ATOM   3198  C   CNT A 208     -45.829 -20.652  -4.780  3.00  0.00           C  
ATOM   3199  C   CNT A 208     -44.874 -23.000  -5.920  3.00  0.00           C  
ATOM   3200  C   CNT A 208     -44.473 -22.683  -4.570  6.00  0.00           C  
ATOM   3201  C   CNT A 208     -45.144 -21.594  -3.980  5.00  0.00           C  
ATOM   3202  C   CNT A 208     -44.675 -21.107  -2.760  4.00  0.00           C  
ATOM   3203  C   CNT A 208     -43.443 -23.285  -3.740  4.00  0.00           C  
ATOM   3204  C   CNT A 208     -42.595 -22.553  -2.890  4.00  0.00           C  
ATOM   3205  C   CNT A 208     -43.304 -21.356  -2.420  4.00  0.00           C  
ATOM   3206  C   CNT A 208     -42.502 -20.403  -1.690  7.00  0.00           C  
ATOM   3207  C   CNT A 208     -41.227 -22.594  -2.720  7.00  0.00           C  
ATOM   3208  C   CNT A 208     -40.414 -21.465  -2.430  9.00  0.00           C  
ATOM   3209  C   CNT A 208     -41.067 -20.338  -1.880  5.00  0.00           C  
ATOM   3210  C   CNT A 208     -40.511 -19.077  -2.000  3.00  0.00           C  
ATOM   3211  C   CNT A 208     -41.099 -18.022  -1.370  5.00  0.00           C  
ATOM   3212  C   CNT A 208     -40.699 -16.707  -1.660  1.00  0.00           C  
ATOM   3213  C   CNT A 208     -41.326 -15.625  -1.090  9.00  0.00           C  
ATOM   3214  C   CNT A 208     -41.082 -14.332  -1.560  8.00  0.00           C  
ATOM   3215  C   CNT A 208     -39.799 -16.532  -2.750  1.00  0.00           C  
ATOM   3216  C   CNT A 208     -39.804 -15.225  -3.400  8.00  0.00           C  
ATOM   3217  C   CNT A 208     -40.435 -14.154  -2.780  2.00  0.00           C  
ATOM   3218  C   CNT A 208     -40.959 -13.127  -3.610  3.00  0.00           C  
ATOM   3219  C   CNT A 208     -39.673 -15.310  -4.810  3.00  0.00           C  
ATOM   3220  C   CNT A 208     -40.474 -14.480  -5.590  6.00  0.00           C  
ATOM   3221  C   CNT A 208     -41.086 -13.359  -5.000  6.00  0.00           C  
ATOM   3222  C   CNT A 208     -42.180 -12.764  -5.630  5.00  0.00           C  
ATOM   3223  C   CNT A 208     -40.901 -14.963  -6.830  6.00  0.00           C  
ATOM   3224  C   CNT A 208     -42.191 -14.605  -7.290  9.00  0.00           C  
ATOM   3225  C   CNT A 208     -42.830 -13.534  -6.650  0.00  0.00           C  
ATOM   3226  C   CNT A 208     -44.225 -13.401  -6.810  9.00  0.00           C  
ATOM   3227  C   CNT A 208     -43.009 -15.590  -7.970  9.00  0.00           C  
ATOM   3228  C   CNT A 208     -44.340 -15.650  -7.680  0.00  0.00           C  
ATOM   3229  C   CNT A 208     -44.969 -14.507  -7.060  4.00  0.00           C  
ATOM   3230  C   CNT A 208     -46.205 -14.729  -6.460  3.00  0.00           C  
ATOM   3231  C   CNT A 208     -45.008 -16.948  -7.660  6.00  0.00           C  
ATOM   3232  C   CNT A 208     -46.084 -17.127  -6.810  9.00  0.00           C  
ATOM   3233  C   CNT A 208     -46.608 -16.029  -6.090  5.00  0.00           C  
ATOM   3234  C   CNT A 208     -47.500 -16.142  -5.050  6.00  0.00           C  
ATOM   3235  C   CNT A 208     -46.403 -18.425  -6.320  6.00  0.00           C  
ATOM   3236  C   CNT A 208     -46.961 -18.510  -5.060  1.00  0.00           C  
ATOM   3237  C   CNT A 208     -47.544 -17.361  -4.410  0.00  0.00           C  
ATOM   3238  C   CNT A 208     -47.814 -17.398  -3.000  2.00  0.00           C  
ATOM   3239  C   CNT A 208     -46.456 -19.533  -4.250  8.00  0.00           C  
ATOM   3240  C   CNT A 208     -46.371 -19.328  -2.850  1.00  0.00           C  
ATOM   3241  C   CNT A 208     -47.021 -18.253  -2.210  9.00  0.00           C  
ATOM   3242  C   CNT A 208     -46.504 -17.758  -1.010  1.00  0.00           C  
ATOM   3243  C   CNT A 208     -45.278 -19.964  -2.190  7.00  0.00           C  
ATOM   3244  C   CNT A 208     -44.508 -19.190  -1.280  8.00  0.00           C  
ATOM   3245  C   CNT A 208     -45.205 -18.146  -0.670  3.00  0.00           C  
ATOM   3246  C   CNT A 208     -44.371 -17.149  -0.020  1.00  0.00           C  
ATOM   3247  C   CNT A 208     -43.132 -19.299  -1.150  1.00  0.00           C  
ATOM   3248  C   CNT A 208     -42.378 -18.153  -0.840  6.00  0.00           C  
ATOM   3249  C   CNT A 208     -42.977 -17.088  -0.210  5.00  0.00           C  
ATOM   3250  C   CNT A 208     -42.340 -15.836  -0.130  0.00  0.00           C  
ATOM   3251  C   CNT A 208     -42.991 -14.767   0.490  3.00  0.00           C  
ATOM   3252  C   CNT A 208     -42.530 -13.456   0.200  5.00  0.00           C  
ATOM   3253  C   CNT A 208     -43.232 -12.413   0.760  3.00  0.00           C  
ATOM   3254  C   CNT A 208     -43.090 -11.115   0.300  3.00  0.00           C  
ATOM   3255  C   CNT A 208     -41.681 -13.261  -0.890  0.00  0.00           C  
ATOM   3256  C   CNT A 208     -41.764 -12.020  -1.620  2.00  0.00           C  
ATOM   3257  C   CNT A 208     -42.502 -10.977  -1.010  4.00  0.00           C  
ATOM   3258  C   CNT A 208     -42.966  -9.896  -1.820  7.00  0.00           C  
ATOM   3259  C   CNT A 208     -41.585 -11.974  -3.050  4.00  0.00           C  
ATOM   3260  C   CNT A 208     -42.431 -11.143  -3.810  6.00  0.00           C  
ATOM   3261  C   CNT A 208     -43.147 -10.119  -3.200  0.00  0.00           C  
ATOM   3262  C   CNT A 208     -44.221  -9.472  -3.850  6.00  0.00           C  
ATOM   3263  C   CNT A 208     -42.869 -11.701  -5.040  6.00  0.00           C  
ATOM   3264  C   CNT A 208     -44.122 -11.290  -5.570  9.00  0.00           C  
ATOM   3265  C   CNT A 208     -44.793 -10.199  -4.920  0.00  0.00           C  
ATOM   3266  C   CNT A 208     -46.208 -10.114  -5.100  3.00  0.00           C  
ATOM   3267  C   CNT A 208     -44.879 -12.262  -6.270  7.00  0.00           C  
ATOM   3268  C   CNT A 208     -46.265 -12.327  -5.970  8.00  0.00           C  
ATOM   3269  C   CNT A 208     -46.899 -11.278  -5.370  5.00  0.00           C  
ATOM   3270  C   CNT A 208     -48.166 -11.449  -4.810  7.00  0.00           C  
ATOM   3271  C   CNT A 208     -46.902 -13.604  -5.970  2.00  0.00           C  
ATOM   3272  C   CNT A 208     -47.946 -13.780  -5.110  1.00  0.00           C  
ATOM   3273  C   CNT A 208     -48.675 -12.739  -4.520  5.00  0.00           C  
ATOM   3274  C   CNT A 208     -49.516 -12.956  -3.420  7.00  0.00           C  
ATOM   3275  C   CNT A 208     -48.207 -15.059  -4.560  8.00  0.00           C  
ATOM   3276  C   CNT A 208     -48.743 -15.204  -3.280  2.00  0.00           C  
ATOM   3277  C   CNT A 208     -49.412 -14.097  -2.690  4.00  0.00           C  
ATOM   3278  C   CNT A 208     -49.550 -14.008  -1.340  9.00  0.00           C  
ATOM   3279  C   CNT A 208     -48.410 -16.279  -2.420  9.00  0.00           C  
ATOM   3280  C   CNT A 208     -48.222 -16.028  -1.090  2.00  0.00           C  
ATOM   3281  C   CNT A 208     -48.839 -14.891  -0.520  8.00  0.00           C  
ATOM   3282  C   CNT A 208     -48.306 -14.467   0.730  4.00  0.00           C  
ATOM   3283  C   CNT A 208     -47.080 -16.635  -0.440  2.00  0.00           C  
ATOM   3284  C   CNT A 208     -46.421 -15.962   0.610  5.00  0.00           C  
ATOM   3285  C   CNT A 208     -47.091 -14.870   1.150  9.00  0.00           C  
ATOM   3286  C   CNT A 208     -46.293 -13.900   1.840  2.00  0.00           C  
ATOM   3287  C   CNT A 208     -45.026 -16.046   0.620  9.00  0.00           C  
ATOM   3288  C   CNT A 208     -44.260 -14.932   0.980  7.00  0.00           C  
ATOM   3289  C   CNT A 208     -44.934 -13.827   1.610  9.00  0.00           C  
ATOM   3290  C   CNT A 208     -44.301 -12.599   1.670  1.00  0.00           C  
ATOM   3291  C   CNT A 208     -44.858 -11.581   2.370  8.00  0.00           C  
ATOM   3292  C   CNT A 208     -44.387 -10.208   2.180  5.00  0.00           C  
ATOM   3293  C   CNT A 208     -45.016  -9.094   2.720  3.00  0.00           C  
ATOM   3294  C   CNT A 208     -44.914  -7.823   2.120  2.00  0.00           C  
ATOM   3295  C   CNT A 208     -43.674  -9.984   0.920  2.00  0.00           C  
ATOM   3296  C   CNT A 208     -43.728  -8.757   0.160  8.00  0.00           C  
ATOM   3297  C   CNT A 208     -44.506  -7.693   0.790  7.00  0.00           C  
ATOM   3298  C   CNT A 208     -44.980  -6.663   0.000  5.00  0.00           C  
ATOM   3299  C   CNT A 208     -43.603  -8.778  -1.220  8.00  0.00           C  
ATOM   3300  C   CNT A 208     -44.358  -7.907  -2.020  0.00  0.00           C  
ATOM   3301  C   CNT A 208     -45.030  -6.841  -1.380  4.00  0.00           C  
ATOM   3302  C   CNT A 208     -46.199  -6.293  -2.010  6.00  0.00           C  
ATOM   3303  C   CNT A 208     -44.854  -8.330  -3.300  4.00  0.00           C  
ATOM   3304  C   CNT A 208     -46.158  -8.063  -3.760  6.00  0.00           C  
ATOM   3305  C   CNT A 208     -46.816  -6.986  -3.100  2.00  0.00           C  
ATOM   3306  C   CNT A 208     -48.221  -6.867  -3.280  4.00  0.00           C  
ATOM   3307  C   CNT A 208     -46.883  -8.967  -4.590  0.00  0.00           C  
ATOM   3308  C   CNT A 208     -48.269  -9.104  -4.300  4.00  0.00           C  
ATOM   3309  C   CNT A 208     -48.946  -7.998  -3.730  3.00  0.00           C  
ATOM   3310  C   CNT A 208     -50.227  -8.208  -3.200  5.00  0.00           C  
ATOM   3311  C   CNT A 208     -48.923 -10.306  -4.330  8.00  0.00           C  
ATOM   3312  C   CNT A 208     -49.986 -10.548  -3.480  8.00  0.00           C  
ATOM   3313  C   CNT A 208     -50.596  -9.468  -2.790  4.00  0.00           C  
ATOM   3314  C   CNT A 208     -51.476  -9.747  -1.720  4.00  0.00           C  
ATOM   3315  C   CNT A 208     -50.205 -11.877  -2.910  5.00  0.00           C  
ATOM   3316  C   CNT A 208     -50.744 -12.028  -1.540  8.00  0.00           C  
ATOM   3317  C   CNT A 208     -51.382 -10.950  -0.940  3.00  0.00           C  
ATOM   3318  C   CNT A 208     -51.409 -10.859   0.450  1.00  0.00           C  
ATOM   3319  C   CNT A 208     -50.212 -13.031  -0.720  0.00  0.00           C  
ATOM   3320  C   CNT A 208     -50.044 -12.791   0.630  4.00  0.00           C  
ATOM   3321  C   CNT A 208     -50.648 -11.683   1.250  1.00  0.00           C  
ATOM   3322  C   CNT A 208     -50.250 -11.234   2.540  4.00  0.00           C  
ATOM   3323  C   CNT A 208     -48.933 -13.383   1.280  7.00  0.00           C  
ATOM   3324  C   CNT A 208     -48.314 -12.628   2.330  7.00  0.00           C  
ATOM   3325  C   CNT A 208     -48.974 -11.555   2.890  2.00  0.00           C  
ATOM   3326  C   CNT A 208     -48.204 -10.674   3.640  3.00  0.00           C  
ATOM   3327  C   CNT A 208     -46.913 -12.773   2.500  4.00  0.00           C  
ATOM   3328  C   CNT A 208     -46.135 -11.696   2.910  5.00  0.00           C  
ATOM   3329  C   CNT A 208     -46.805 -10.601   3.470  2.00  0.00           C  
ATOM   3330  C   CNT A 208     -46.103  -9.348   3.550  7.00  0.00           C  
ATOM   3331  C   CNT A 208     -46.825  -8.321   4.130  9.00  0.00           C  
ATOM   3332  C   CNT A 208     -46.398  -7.018   3.840  5.00  0.00           C  
ATOM   3333  C   CNT A 208     -47.176  -5.915   4.410  6.00  0.00           C  
ATOM   3334  C   CNT A 208     -47.002  -4.614   3.860  7.00  0.00           C  
ATOM   3335  C   CNT A 208     -45.534  -6.757   2.730  4.00  0.00           C  
ATOM   3336  C   CNT A 208     -45.786  -5.569   1.990  8.00  0.00           C  
ATOM   3337  C   CNT A 208     -46.451  -4.476   2.590  4.00  0.00           C  
ATOM   3338  C   CNT A 208     -46.881  -3.420   1.840  1.00  0.00           C  
ATOM   3339  C   CNT A 208     -45.605  -5.562   0.610  7.00  0.00           C  
ATOM   3340  C   CNT A 208     -46.448  -4.758  -0.170  4.00  0.00           C  
ATOM   3341  C   CNT A 208     -47.029  -3.619   0.430  5.00  0.00           C  
ATOM   3342  C   CNT A 208     -48.234  -3.135  -0.160  0.00  0.00           C  
ATOM   3343  C   CNT A 208     -46.848  -5.203  -1.450  2.00  0.00           C  
ATOM   3344  C   CNT A 208     -48.116  -4.853  -1.900  4.00  0.00           C  
ATOM   3345  C   CNT A 208     -48.771  -3.823  -1.250  8.00  0.00           C  
ATOM   3346  C   CNT A 208     -50.150  -3.575  -1.580  0.00  0.00           C  
ATOM   3347  C   CNT A 208     -48.863  -5.799  -2.650  1.00  0.00           C  
ATOM   3348  C   CNT A 208     -50.204  -5.875  -2.420  3.00  0.00           C  
ATOM   3349  C   CNT A 208     -50.881  -4.735  -1.900  4.00  0.00           C  
ATOM   3350  C   CNT A 208     -52.199  -4.918  -1.480  6.00  0.00           C  
ATOM   3351  C   CNT A 208     -50.861  -7.138  -2.560  3.00  0.00           C  
ATOM   3352  C   CNT A 208     -51.840  -7.315  -1.600  5.00  0.00           C  
ATOM   3353  C   CNT A 208     -52.568  -6.209  -1.130  8.00  0.00           C  
ATOM   3354  C   CNT A 208     -53.411  -6.425  -0.030  3.00  0.00           C  
ATOM   3355  C   CNT A 208     -52.076  -8.628  -1.110  4.00  0.00           C  
ATOM   3356  C   CNT A 208     -52.612  -8.778   0.190  6.00  0.00           C  
ATOM   3357  C   CNT A 208     -53.213  -7.623   0.710  3.00  0.00           C  
ATOM   3358  C   CNT A 208     -53.258  -7.507   2.130  1.00  0.00           C  
ATOM   3359  C   CNT A 208     -51.983  -9.718   1.020  6.00  0.00           C  
ATOM   3360  C   CNT A 208     -51.874  -9.445   2.340  0.00  0.00           C  
ATOM   3361  C   CNT A 208     -52.458  -8.284   2.900  8.00  0.00           C  
ATOM   3362  C   CNT A 208     -52.129  -7.896   4.190  0.00  0.00           C  
ATOM   3363  C   CNT A 208     -50.900 -10.132   3.120  4.00  0.00           C  
ATOM   3364  C   CNT A 208     -50.256  -9.448   4.150  1.00  0.00           C  
ATOM   3365  C   CNT A 208     -50.935  -8.394   4.720  7.00  0.00           C  
ATOM   3366  C   CNT A 208     -50.130  -7.472   5.510  7.00  0.00           C  
ATOM   3367  C   CNT A 208     -48.893  -9.580   4.200  0.00  0.00           C  
ATOM   3368  C   CNT A 208     -48.084  -8.466   4.610  8.00  0.00           C  
ATOM   3369  C   CNT A 208     -48.725  -7.450   5.330  9.00  0.00           C  
ATOM   3370  C   CNT A 208     -48.173  -6.136   5.360  1.00  0.00           C  
ATOM   3371  C   CNT A 208     -48.904  -5.068   5.900  7.00  0.00           C  
ATOM   3372  C   CNT A 208     -48.539  -3.782   5.590  3.00  0.00           C  
ATOM   3373  C   CNT A 208     -49.172  -2.702   6.140  5.00  0.00           C  
ATOM   3374  C   CNT A 208     -49.049  -1.394   5.650  1.00  0.00           C  
ATOM   3375  C   CNT A 208     -47.792  -3.562   4.400  9.00  0.00           C  
ATOM   3376  C   CNT A 208     -47.888  -2.354   3.800  0.00  0.00           C  
ATOM   3377  C   CNT A 208     -48.495  -1.244   4.370  8.00  0.00           C  
ATOM   3378  C   CNT A 208     -48.951  -0.185   3.600  5.00  0.00           C  
ATOM   3379  C   CNT A 208     -47.644  -2.373   2.440  6.00  0.00           C  
ATOM   3380  C   CNT A 208     -48.477  -1.559   1.630  6.00  0.00           C  
ATOM   3381  C   CNT A 208     -49.087  -0.417   2.180  5.00  0.00           C  
ATOM   3382  C   CNT A 208     -50.093   0.217   1.480  5.00  0.00           C  
ATOM   3383  C   CNT A 208     -48.868  -2.027   0.380  7.00  0.00           C  
ATOM   3384  C   CNT A 208     -50.112  -1.577  -0.200  9.00  0.00           C  
ATOM   3385  C   CNT A 208     -50.734  -0.514   0.410  4.00  0.00           C  
ATOM   3386  C   CNT A 208     -52.140  -0.366   0.230  1.00  0.00           C  
ATOM   3387  C   CNT A 208     -50.826  -2.453  -1.000  4.00  0.00           C  
ATOM   3388  C   CNT A 208     -52.248  -2.494  -0.940  4.00  0.00           C  
ATOM   3389  C   CNT A 208     -52.899  -1.412  -0.270  2.00  0.00           C  
ATOM   3390  C   CNT A 208     -54.228  -1.642   0.220  4.00  0.00           C  
ATOM   3391  C   CNT A 208     -52.873  -3.796  -0.930  2.00  0.00           C  
ATOM   3392  C   CNT A 208     -53.922  -4.027   0.000  7.00  0.00           C  
ATOM   3393  C   CNT A 208     -54.575  -2.952   0.620  9.00  0.00           C  
ATOM   3394  C   CNT A 208     -55.271  -3.209   1.830  7.00  0.00           C  
ATOM   3395  C   CNT A 208     -53.927  -5.291   0.600  3.00  0.00           C  
ATOM   3396  C   CNT A 208     -54.429  -5.426   1.870  2.00  0.00           C  
ATOM   3397  C   CNT A 208     -55.060  -4.379   2.510  6.00  0.00           C  
ATOM   3398  C   CNT A 208     -55.303  -4.344   3.900  0.00  0.00           C  
ATOM   3399  C   CNT A 208     -53.950  -6.427   2.690  0.00  0.00           C  
ATOM   3400  C   CNT A 208     -53.855  -6.206   4.110  0.00  0.00           C  
ATOM   3401  C   CNT A 208     -54.515  -5.182   4.710  1.00  0.00           C  
ATOM   3402  C   CNT A 208     -54.136  -4.864   6.070  7.00  0.00           C  
ATOM   3403  C   CNT A 208     -52.782  -6.833   4.820  0.00  0.00           C  
ATOM   3404  C   CNT A 208     -52.207  -6.258   5.960  5.00  0.00           C  
ATOM   3405  C   CNT A 208     -52.852  -5.209   6.620  0.00  0.00           C  
ATOM   3406  C   CNT A 208     -52.199  -4.357   7.530  1.00  0.00           C  
ATOM   3407  C   CNT A 208     -50.834  -6.393   6.140  4.00  0.00           C  
ATOM   3408  C   CNT A 208     -50.086  -5.317   6.580  0.00  0.00           C  
ATOM   3409  C   CNT A 208     -50.750  -4.223   7.300  2.00  0.00           C  
ATOM   3410  C   CNT A 208     -50.178  -2.939   7.130  3.00  0.00           C  
ATOM   3411  C   CNT A 208     -50.764  -1.832   7.740  4.00  0.00           C  
ATOM   3412  C   CNT A 208     -50.398  -0.507   7.440  3.00  0.00           C  
ATOM   3413  C   CNT A 208     -51.101   0.573   7.970  6.00  0.00           C  
ATOM   3414  C   CNT A 208     -50.915   1.854   7.430  9.00  0.00           C  
ATOM   3415  C   CNT A 208     -49.670  -0.258   6.290  3.00  0.00           C  
ATOM   3416  C   CNT A 208     -49.793   0.907   5.530  6.00  0.00           C  
ATOM   3417  C   CNT A 208     -50.410   2.009   6.120  9.00  0.00           C  
ATOM   3418  C   CNT A 208     -50.878   3.050   5.350  9.00  0.00           C  
ATOM   3419  C   CNT A 208     -49.610   0.878   4.140  9.00  0.00           C  
ATOM   3420  C   CNT A 208     -50.414   1.740   3.360  0.00  0.00           C  
ATOM   3421  C   CNT A 208     -51.060   2.795   3.970  1.00  0.00           C  
ATOM   3422  C   CNT A 208     -52.143   3.407   3.320  5.00  0.00           C  
ATOM   3423  C   CNT A 208     -50.795   1.272   2.100  3.00  0.00           C  
ATOM   3424  C   CNT A 208     -52.077   1.589   1.630  8.00  0.00           C  
ATOM   3425  C   CNT A 208     -52.762   2.749   2.220  8.00  0.00           C  
ATOM   3426  C   CNT A 208     -54.147   2.824   2.080  3.00  0.00           C  
ATOM   3427  C   CNT A 208     -52.795   0.710   0.820  6.00  0.00           C  
ATOM   3428  C   CNT A 208     -54.251   0.707   0.960  5.00  0.00           C  
ATOM   3429  C   CNT A 208     -54.911   1.695   1.570  0.00  0.00           C  
ATOM   3430  C   CNT A 208     -56.169   1.532   2.130  9.00  0.00           C  
ATOM   3431  C   CNT A 208     -54.911  -0.580   0.900  5.00  0.00           C  
ATOM   3432  C   CNT A 208     -55.997  -0.867   1.770  4.00  0.00           C  
ATOM   3433  C   CNT A 208     -56.629   0.201   2.430  3.00  0.00           C  
ATOM   3434  C   CNT A 208     -57.495  -0.038   3.490  0.00  0.00           C  
ATOM   3435  C   CNT A 208     -55.996  -2.140   2.350  6.00  0.00           C  
ATOM   3436  C   CNT A 208     -56.513  -2.215   3.680  2.00  0.00           C  
ATOM   3437  C   CNT A 208     -57.195  -1.188   4.250  9.00  0.00           C  
ATOM   3438  C   CNT A 208     -57.421  -1.198   5.660  7.00  0.00           C  
ATOM   3439  C   CNT A 208     -55.968  -3.265   4.490  9.00  0.00           C  
ATOM   3440  C   CNT A 208     -55.877  -3.098   5.840  3.00  0.00           C  
ATOM   3441  C   CNT A 208     -56.565  -2.013   6.430  9.00  0.00           C  
ATOM   3442  C   CNT A 208     -56.100  -1.452   7.630  7.00  0.00           C  
ATOM   3443  C   CNT A 208     -54.793  -3.725   6.550  7.00  0.00           C  
ATOM   3444  C   CNT A 208     -54.243  -3.010   7.640  8.00  0.00           C  
ATOM   3445  C   CNT A 208     -54.854  -1.935   8.220  1.00  0.00           C  
ATOM   3446  C   CNT A 208     -54.177  -1.001   9.050  1.00  0.00           C  
ATOM   3447  C   CNT A 208     -52.836  -3.182   7.970  0.00  0.00           C  
ATOM   3448  C   CNT A 208     -52.079  -1.996   8.260  6.00  0.00           C  
ATOM   3449  C   CNT A 208     -52.748  -0.966   8.890  7.00  0.00           C  
ATOM   3450  C   CNT A 208     -52.149   0.341   8.910  9.00  0.00           C  
ATOM   3451  C   CNT A 208     -52.730   1.432   9.530  9.00  0.00           C  
ATOM   3452  C   CNT A 208     -52.374   2.767   9.150  3.00  0.00           C  
ATOM   3453  C   CNT A 208     -53.140   3.810   9.650  1.00  0.00           C  
ATOM   3454  C   CNT A 208     -53.060   5.111   9.130  3.00  0.00           C  
ATOM   3455  C   CNT A 208     -51.545   2.910   8.030  4.00  0.00           C  
ATOM   3456  C   CNT A 208     -51.691   4.182   7.340  9.00  0.00           C  
ATOM   3457  C   CNT A 208     -52.449   5.297   7.890  0.00  0.00           C  
ATOM   3458  C   CNT A 208     -52.915   6.370   7.050  7.00  0.00           C  
ATOM   3459  C   CNT A 208     -51.479   4.206   5.910  6.00  0.00           C  
ATOM   3460  C   CNT A 208     -52.407   4.991   5.140  9.00  0.00           C  
ATOM   3461  C   CNT A 208     -53.059   6.092   5.670  4.00  0.00           C  
ATOM   3462  C   CNT A 208     -54.148   6.650   5.010  9.00  0.00           C  
ATOM   3463  C   CNT A 208     -52.814   4.428   3.950  9.00  0.00           C  
ATOM   3464  C   CNT A 208     -54.074   4.823   3.470  2.00  0.00           C  
ATOM   3465  C   CNT A 208     -54.776   5.880   4.030  7.00  0.00           C  
ATOM   3466  C   CNT A 208     -56.150   6.104   3.770  3.00  0.00           C  
ATOM   3467  C   CNT A 208     -54.791   3.947   2.620  0.00  0.00           C  
ATOM   3468  C   CNT A 208     -56.194   3.895   2.730  5.00  0.00           C  
ATOM   3469  C   CNT A 208     -56.876   4.966   3.390  4.00  0.00           C  
ATOM   3470  C   CNT A 208     -58.125   4.751   3.980  1.00  0.00           C  
ATOM   3471  C   CNT A 208     -56.786   2.606   2.780  1.00  0.00           C  
ATOM   3472  C   CNT A 208     -57.836   2.403   3.710  2.00  0.00           C  
ATOM   3473  C   CNT A 208     -58.548   3.438   4.240  4.00  0.00           C  
ATOM   3474  C   CNT A 208     -59.518   3.221   5.250  6.00  0.00           C  
ATOM   3475  C   CNT A 208     -58.161   1.056   4.100  0.00  0.00           C  
ATOM   3476  C   CNT A 208     -58.729   0.832   5.420  5.00  0.00           C  
ATOM   3477  C   CNT A 208     -59.298   1.998   6.030  1.00  0.00           C  
ATOM   3478  C   CNT A 208     -59.500   1.999   7.420  3.00  0.00           C  
ATOM   3479  C   CNT A 208     -58.063  -0.098   6.210  9.00  0.00           C  
ATOM   3480  C   CNT A 208     -57.774   0.259   7.540  8.00  0.00           C  
ATOM   3481  C   CNT A 208     -58.530   1.253   8.150  5.00  0.00           C  
ATOM   3482  C   CNT A 208     -58.162   1.707   9.430  3.00  0.00           C  
ATOM   3483  C   CNT A 208     -56.677  -0.340   8.160  1.00  0.00           C  
ATOM   3484  C   CNT A 208     -56.165   0.355   9.280  9.00  0.00           C  
ATOM   3485  C   CNT A 208     -56.888   1.322   9.910  7.00  0.00           C  
ATOM   3486  C   CNT A 208     -56.154   2.208  10.780  2.00  0.00           C  
ATOM   3487  C   CNT A 208     -54.774   0.144   9.490  0.00  0.00           C  
ATOM   3488  C   CNT A 208     -54.040   1.233  10.010  3.00  0.00           C  
ATOM   3489  C   CNT A 208     -54.775   2.309  10.620  8.00  0.00           C  
ATOM   3490  C   CNT A 208     -54.157   3.569  10.600  8.00  0.00           C  
ATOM   3491  C   CNT A 208     -54.858   4.650  11.160  3.00  0.00           C  
ATOM   3492  C   CNT A 208     -54.398   5.943  10.910  2.00  0.00           C  
ATOM   3493  C   CNT A 208     -55.114   7.022  11.470  7.00  0.00           C  
ATOM   3494  C   CNT A 208     -54.897   8.331  10.980  0.00  0.00           C  
ATOM   3495  C   CNT A 208     -53.609   6.185   9.790  8.00  0.00           C  
ATOM   3496  C   CNT A 208     -53.816   7.385   9.070  0.00  0.00           C  
ATOM   3497  C   CNT A 208     -54.514   8.401   9.630  7.00  0.00           C  
ATOM   3498  C   CNT A 208     -55.012   9.443   8.810  1.00  0.00           C  
ATOM   3499  C   CNT A 208     -53.596   7.376   7.700  9.00  0.00           C  
ATOM   3500  C   CNT A 208     -54.415   8.153   6.910  7.00  0.00           C  
ATOM   3501  C   CNT A 208     -55.089   9.211   7.410  2.00  0.00           C  
ATOM   3502  C   CNT A 208     -56.103   9.906   6.740  2.00  0.00           C  
ATOM   3503  C   CNT A 208     -54.852   7.638   5.690  6.00  0.00           C  
ATOM   3504  C   CNT A 208     -56.065   8.092   5.150  7.00  0.00           C  
ATOM   3505  C   CNT A 208     -56.731   9.200   5.700  3.00  0.00           C  
ATOM   3506  C   CNT A 208     -58.175   9.324   5.580  9.00  0.00           C  
ATOM   3507  C   CNT A 208     -56.835   7.232   4.370  6.00  0.00           C  
ATOM   3508  C   CNT A 208     -58.225   7.104   4.560  0.00  0.00           C  
ATOM   3509  C   CNT A 208     -58.950   8.226   5.060  0.00  0.00           C  
ATOM   3510  C   CNT A 208     -60.176   8.004   5.690  3.00  0.00           C  
ATOM   3511  C   CNT A 208     -58.825   5.825   4.510  6.00  0.00           C  
ATOM   3512  C   CNT A 208     -59.949   5.609   5.360  1.00  0.00           C  
ATOM   3513  C   CNT A 208     -60.597   6.724   5.950  2.00  0.00           C  
ATOM   3514  C   CNT A 208     -61.465   6.520   7.020  9.00  0.00           C  
ATOM   3515  C   CNT A 208     -60.159   4.258   5.850  7.00  0.00           C  
ATOM   3516  C   CNT A 208     -60.599   4.133   7.250  0.00  0.00           C  
ATOM   3517  C   CNT A 208     -61.312   5.256   7.730  0.00  0.00           C  
ATOM   3518  C   CNT A 208     -61.452   5.257   9.160  9.00  0.00           C  
ATOM   3519  C   CNT A 208     -60.120   3.073   8.030  0.00  0.00           C  
ATOM   3520  C   CNT A 208     -59.973   3.347   9.410  6.00  0.00           C  
ATOM   3521  C   CNT A 208     -60.609   4.443   9.970  4.00  0.00           C  
ATOM   3522  C   CNT A 208     -60.288   4.840  11.310  4.00  0.00           C  
ATOM   3523  C   CNT A 208     -58.903   2.721  10.060  1.00  0.00           C  
ATOM   3524  C   CNT A 208     -58.286   3.487  11.110  3.00  0.00           C  
ATOM   3525  C   CNT A 208     -58.982   4.567  11.700  0.00  0.00           C  
ATOM   3526  C   CNT A 208     -58.233   5.466  12.480  3.00  0.00           C  
ATOM   3527  C   CNT A 208     -56.842   3.326  11.340  5.00  0.00           C  
ATOM   3528  C   CNT A 208     -56.151   4.487  11.700  6.00  0.00           C  
ATOM   3529  C   CNT A 208     -56.887   5.597  12.170  3.00  0.00           C  
ATOM   3530  C   CNT A 208     -56.246   6.818  12.320  5.00  0.00           C  
ATOM   3531  C   CNT A 208     -56.865   7.869  12.970  1.00  0.00           C  
ATOM   3532  C   CNT A 208     -56.341   9.156  12.800  0.00  0.00           C  
ATOM   3533  C   CNT A 208     -57.116  10.242  13.270  9.00  0.00           C  
ATOM   3534  C   CNT A 208     -57.012  11.550  12.730  3.00  0.00           C  
ATOM   3535  C   CNT A 208     -55.545   9.412  11.620  5.00  0.00           C  
ATOM   3536  C   CNT A 208     -55.757  10.578  10.850  2.00  0.00           C  
ATOM   3537  C   CNT A 208     -56.472  11.672  11.430  3.00  0.00           C  
ATOM   3538  C   CNT A 208     -56.927  12.712  10.630  2.00  0.00           C  
ATOM   3539  C   CNT A 208     -55.527  10.559   9.420  6.00  0.00           C  
ATOM   3540  C   CNT A 208     -56.315  11.473   8.630  3.00  0.00           C  
ATOM   3541  C   CNT A 208     -56.971  12.521   9.230  9.00  0.00           C  
ATOM   3542  C   CNT A 208     -58.120  13.098   8.570  5.00  0.00           C  
ATOM   3543  C   CNT A 208     -56.759  10.929   7.380  8.00  0.00           C  
ATOM   3544  C   CNT A 208     -58.085  11.280   6.960  1.00  0.00           C  
ATOM   3545  C   CNT A 208     -58.721  12.351   7.580  7.00  0.00           C  
ATOM   3546  C   CNT A 208     -60.116  12.427   7.410  4.00  0.00           C  
ATOM   3547  C   CNT A 208     -58.838  10.298   6.260  2.00  0.00           C  
ATOM   3548  C   CNT A 208     -60.239  10.259   6.390  8.00  0.00           C  
ATOM   3549  C   CNT A 208     -60.879  11.371   6.940  0.00  0.00           C  
ATOM   3550  C   CNT A 208     -62.126  11.185   7.540  2.00  0.00           C  
ATOM   3551  C   CNT A 208     -60.896   9.044   6.280  2.00  0.00           C  
ATOM   3552  C   CNT A 208     -61.889   8.785   7.230  5.00  0.00           C  
ATOM   3553  C   CNT A 208     -62.572   9.903   7.780  5.00  0.00           C  
ATOM   3554  C   CNT A 208     -63.369   9.653   8.920  2.00  0.00           C  
ATOM   3555  C   CNT A 208     -62.011   7.518   7.750  7.00  0.00           C  
ATOM   3556  C   CNT A 208     -62.635   7.340   8.990  4.00  0.00           C  
ATOM   3557  C   CNT A 208     -63.276   8.398   9.570  8.00  0.00           C  
ATOM   3558  C   CNT A 208     -63.406   8.525  10.950  5.00  0.00           C  
ATOM   3559  C   CNT A 208     -62.203   6.275   9.790  3.00  0.00           C  
ATOM   3560  C   CNT A 208     -62.113   6.451  11.210  5.00  0.00           C  
ATOM   3561  C   CNT A 208     -62.702   7.648  11.720  0.00  0.00           C  
ATOM   3562  C   CNT A 208     -62.287   8.096  13.020  8.00  0.00           C  
ATOM   3563  C   CNT A 208     -60.953   5.986  11.830  2.00  0.00           C  
ATOM   3564  C   CNT A 208     -60.281   6.818  12.740  3.00  0.00           C  
ATOM   3565  C   CNT A 208     -60.940   7.802  13.420  7.00  0.00           C  
ATOM   3566  C   CNT A 208     -60.197   8.709  14.240  2.00  0.00           C  
ATOM   3567  C   CNT A 208     -58.905   6.587  12.970  0.00  0.00           C  
ATOM   3568  C   CNT A 208     -58.161   7.678  13.440  1.00  0.00           C  
ATOM   3569  C   CNT A 208     -58.775   8.740  14.130  2.00  0.00           C  
ATOM   3570  C   CNT A 208     -58.145   9.982  14.160  5.00  0.00           C  
ATOM   3571  C   CNT A 208     -58.871  11.142  14.640  0.00  0.00           C  
ATOM   3572  C   CNT A 208     -58.447  12.457  14.400  4.00  0.00           C  
ATOM   3573  C   CNT A 208     -59.118  13.507  14.950  0.00  0.00           C  
ATOM   3574  C   CNT A 208     -58.837  14.850  14.480  8.00  0.00           C  
ATOM   3575  C   CNT A 208     -57.583  12.737  13.310  6.00  0.00           C  
ATOM   3576  C   CNT A 208     -57.721  13.942  12.580  9.00  0.00           C  
ATOM   3577  C   CNT A 208     -58.423  14.974  13.160  8.00  0.00           C  
ATOM   3578  C   CNT A 208     -58.872  15.975  12.270  2.00  0.00           C  
ATOM   3579  C   CNT A 208     -57.577  13.845  11.200  1.00  0.00           C  
ATOM   3580  C   CNT A 208     -58.364  14.654  10.320  9.00  0.00           C  
ATOM   3581  C   CNT A 208     -59.050  15.756  10.910  3.00  0.00           C  
ATOM   3582  C   CNT A 208     -60.027  16.437  10.120  4.00  0.00           C  
ATOM   3583  C   CNT A 208     -58.808  14.166   9.130  1.00  0.00           C  
ATOM   3584  C   CNT A 208     -60.129  14.538   8.690  7.00  0.00           C  
ATOM   3585  C   CNT A 208     -60.734  15.705   9.140  1.00  0.00           C  
ATOM   3586  C   CNT A 208     -62.101  15.776   9.040  6.00  0.00           C  
ATOM   3587  C   CNT A 208     -60.794  13.564   7.920  2.00  0.00           C  
ATOM   3588  C   CNT A 208     -62.176  13.527   8.170  5.00  0.00           C  
ATOM   3589  C   CNT A 208     -62.828  14.600   8.700  4.00  0.00           C  
ATOM   3590  C   CNT A 208     -64.182  14.410   9.130  4.00  0.00           C  
ATOM   3591  C   CNT A 208     -62.778  12.255   8.160  1.00  0.00           C  
ATOM   3592  C   CNT A 208     -63.954  12.041   8.950  3.00  0.00           C  
ATOM   3593  C   CNT A 208     -64.669  13.139   9.430  6.00  0.00           C  
ATOM   3594  C   CNT A 208     -65.529  12.932  10.520  7.00  0.00           C  
ATOM   3595  C   CNT A 208     -64.160  10.709   9.440  6.00  0.00           C  
ATOM   3596  C   CNT A 208     -64.625  10.629  10.750  8.00  0.00           C  
ATOM   3597  C   CNT A 208     -65.366  11.672  11.260  6.00  0.00           C  
ATOM   3598  C   CNT A 208     -65.492  11.737  12.670  2.00  0.00           C  
ATOM   3599  C   CNT A 208     -64.133   9.568  11.530  0.00  0.00           C  
ATOM   3600  C   CNT A 208     -64.053   9.768  12.930  0.00  0.00           C  
ATOM   3601  C   CNT A 208     -64.686  10.927  13.460  8.00  0.00           C  
ATOM   3602  C   CNT A 208     -64.289  11.427  14.710  5.00  0.00           C  
ATOM   3603  C   CNT A 208     -62.926   9.224  13.600  5.00  0.00           C  
ATOM   3604  C   CNT A 208     -62.300   9.919  14.670  0.00  0.00           C  
ATOM   3605  C   CNT A 208     -63.022  10.987  15.220  4.00  0.00           C  
ATOM   3606  C   CNT A 208     -62.191  11.960  15.860  9.00  0.00           C  
ATOM   3607  C   CNT A 208     -60.889   9.830  14.850  1.00  0.00           C  
ATOM   3608  C   CNT A 208     -60.154  10.977  15.110  4.00  0.00           C  
ATOM   3609  C   CNT A 208     -60.828  12.032  15.660  0.00  0.00           C  
ATOM   3610  C   CNT A 208     -60.159  13.253  15.810  3.00  0.00           C  
ATOM   3611  C   CNT A 208     -60.756  14.321  16.390  8.00  0.00           C  
ATOM   3612  C   CNT A 208     -60.344  15.650  16.170  8.00  0.00           C  
ATOM   3613  C   CNT A 208     -61.038  16.740  16.740  1.00  0.00           C  
ATOM   3614  C   CNT A 208     -60.987  17.966  16.130  0.00  0.00           C  
ATOM   3615  C   CNT A 208     -59.521  15.934  15.100  4.00  0.00           C  
ATOM   3616  C   CNT A 208     -59.677  17.073  14.240  6.00  0.00           C  
ATOM   3617  C   CNT A 208     -60.472  18.094  14.800  3.00  0.00           C  
ATOM   3618  C   CNT A 208     -60.840  19.160  14.030  5.00  0.00           C  
ATOM   3619  C   CNT A 208     -59.488  17.040  12.860  2.00  0.00           C  
ATOM   3620  C   CNT A 208     -60.134  17.989  12.020  5.00  0.00           C  
ATOM   3621  C   CNT A 208     -60.850  18.991  12.610  1.00  0.00           C  
ATOM   3622  C   CNT A 208     -61.984  19.607  11.980  6.00  0.00           C  
ATOM   3623  C   CNT A 208     -60.627  17.502  10.760  4.00  0.00           C  
ATOM   3624  C   CNT A 208     -61.915  17.786  10.360  3.00  0.00           C  
ATOM   3625  C   CNT A 208     -62.626  18.852  10.970  8.00  0.00           C  
ATOM   3626  C   CNT A 208     -64.016  19.006  10.820  7.00  0.00           C  
ATOM   3627  C   CNT A 208     -62.721  16.819   9.750  0.00  0.00           C  
ATOM   3628  C   CNT A 208     -64.117  16.790   9.840  3.00  0.00           C  
ATOM   3629  C   CNT A 208     -64.753  17.947  10.330  5.00  0.00           C  
ATOM   3630  C   CNT A 208     -66.016  17.779  10.940  8.00  0.00           C  
ATOM   3631  C   CNT A 208     -64.830  15.542   9.690  8.00  0.00           C  
ATOM   3632  C   CNT A 208     -65.934  15.329  10.530  8.00  0.00           C  
ATOM   3633  C   CNT A 208     -66.466  16.452  11.170  6.00  0.00           C  
ATOM   3634  C   CNT A 208     -67.219  16.268  12.360  4.00  0.00           C  
ATOM   3635  C   CNT A 208     -66.177  14.057  11.050  0.00  0.00           C  
ATOM   3636  C   CNT A 208     -66.602  13.939  12.400  3.00  0.00           C  
ATOM   3637  C   CNT A 208     -67.223  15.042  13.010  3.00  0.00           C  
ATOM   3638  C   CNT A 208     -67.438  15.003  14.380  3.00  0.00           C  
ATOM   3639  C   CNT A 208     -66.173  12.844  13.190  1.00  0.00           C  
ATOM   3640  C   CNT A 208     -65.894  13.212  14.550  4.00  0.00           C  
ATOM   3641  C   CNT A 208     -66.649  14.197  15.170  5.00  0.00           C  
ATOM   3642  C   CNT A 208     -66.217  14.646  16.420  2.00  0.00           C  
ATOM   3643  C   CNT A 208     -64.855  12.561  15.210  4.00  0.00           C  
ATOM   3644  C   CNT A 208     -64.215  13.236  16.210  6.00  0.00           C  
ATOM   3645  C   CNT A 208     -64.881  14.255  16.890  1.00  0.00           C  
ATOM   3646  C   CNT A 208     -64.145  15.149  17.690  5.00  0.00           C  
ATOM   3647  C   CNT A 208     -62.805  13.052  16.490  4.00  0.00           C  
ATOM   3648  C   CNT A 208     -62.061  14.174  16.910  9.00  0.00           C  
ATOM   3649  C   CNT A 208     -62.731  15.196  17.610  7.00  0.00           C  
ATOM   3650  C   CNT A 208     -62.086  16.437  17.670  6.00  0.00           C  
ATOM   3651  C   CNT A 208     -62.719  17.551  18.200  8.00  0.00           C  
ATOM   3652  C   CNT A 208     -62.359  18.867  17.900  9.00  0.00           C  
ATOM   3653  C   CNT A 208     -62.947  19.993  18.560  4.00  0.00           C  
ATOM   3654  C   CNT A 208     -62.729  21.242  17.970  0.00  0.00           C  
ATOM   3655  C   CNT A 208     -61.584  19.083  16.760  7.00  0.00           C  
ATOM   3656  C   CNT A 208     -61.641  20.277  16.030  0.00  0.00           C  
ATOM   3657  C   CNT A 208     -62.285  21.380  16.640  6.00  0.00           C  
ATOM   3658  C   CNT A 208     -62.683  22.453  15.810  8.00  0.00           C  
ATOM   3659  C   CNT A 208     -61.452  20.262  14.650  2.00  0.00           C  
ATOM   3660  C   CNT A 208     -62.205  21.162  13.840  0.00  0.00           C  
ATOM   3661  C   CNT A 208     -62.848  22.239  14.430  4.00  0.00           C  
ATOM   3662  C   CNT A 208     -63.860  22.867  13.740  3.00  0.00           C  
ATOM   3663  C   CNT A 208     -62.623  20.667  12.640  1.00  0.00           C  
ATOM   3664  C   CNT A 208     -63.895  21.107  12.090  3.00  0.00           C  
ATOM   3665  C   CNT A 208     -64.543  22.172  12.750  4.00  0.00           C  
ATOM   3666  C   CNT A 208     -65.934  22.263  12.620  9.00  0.00           C  
ATOM   3667  C   CNT A 208     -64.701  20.097  11.370  3.00  0.00           C  
ATOM   3668  C   CNT A 208     -66.102  20.154  11.460  5.00  0.00           C  
ATOM   3669  C   CNT A 208     -66.727  21.222  12.080  7.00  0.00           C  
ATOM   3670  C   CNT A 208     -68.004  21.017  12.620  5.00  0.00           C  
ATOM   3671  C   CNT A 208     -66.717  18.886  11.480  2.00  0.00           C  
ATOM   3672  C   CNT A 208     -67.790  18.621  12.410  7.00  0.00           C  
ATOM   3673  C   CNT A 208     -68.401  19.684  13.040  8.00  0.00           C  
ATOM   3674  C   CNT A 208     -69.108  19.579  14.180  2.00  0.00           C  
ATOM   3675  C   CNT A 208     -67.831  17.352  12.990  1.00  0.00           C  
ATOM   3676  C   CNT A 208     -68.442  17.220  14.270  2.00  0.00           C  
ATOM   3677  C   CNT A 208     -69.051  18.367  14.790  0.00  0.00           C  
ATOM   3678  C   CNT A 208     -69.104  18.449  16.200  4.00  0.00           C  
ATOM   3679  C   CNT A 208     -68.058  16.145  15.000  0.00  0.00           C  
ATOM   3680  C   CNT A 208     -67.980  16.339  16.440  1.00  0.00           C  
ATOM   3681  C   CNT A 208     -68.522  17.448  17.040  6.00  0.00           C  
ATOM   3682  C   CNT A 208     -68.118  17.872  18.290  9.00  0.00           C  
ATOM   3683  C   CNT A 208     -66.836  15.693  17.080  0.00  0.00           C  
ATOM   3684  C   CNT A 208     -66.176  16.384  18.100  2.00  0.00           C  
ATOM   3685  C   CNT A 208     -66.838  17.502  18.750  0.00  0.00           C  
ATOM   3686  C   CNT A 208     -66.076  18.409  19.540  7.00  0.00           C  
ATOM   3687  C   CNT A 208     -64.789  16.274  18.270  8.00  0.00           C  
ATOM   3688  C   CNT A 208     -64.027  17.397  18.700  1.00  0.00           C  
ATOM   3689  C   CNT A 208     -64.731  18.522  19.270  1.00  0.00           C  
ATOM   3690  C   CNT A 208     -64.038  19.761  19.430  7.00  0.00           C  
ATOM   3691  C   CNT A 208     -64.751  20.872  19.900  3.00  0.00           C  
ATOM   3692  C   CNT A 208     -64.244  22.162  19.660  7.00  0.00           C  
ATOM   3693  C   CNT A 208     -64.881  23.271  20.210  1.00  0.00           C  
ATOM   3694  C   CNT A 208     -64.586  24.546  19.680  6.00  0.00           C  
ATOM   3695  C   CNT A 208     -63.271  22.348  18.610  0.00  0.00           C  
ATOM   3696  C   CNT A 208     -63.378  23.564  17.860  8.00  0.00           C  
ATOM   3697  C   CNT A 208     -64.028  24.685  18.390  8.00  0.00           C  
ATOM   3698  C   CNT A 208     -64.516  25.762  17.600  6.00  0.00           C  
ATOM   3699  C   CNT A 208     -63.226  23.559  16.450  1.00  0.00           C  
ATOM   3700  C   CNT A 208     -64.015  24.431  15.590  3.00  0.00           C  
ATOM   3701  C   CNT A 208     -64.711  25.474  16.220  7.00  0.00           C  
ATOM   3702  C   CNT A 208     -65.786  26.108  15.540  5.00  0.00           C  
ATOM   3703  C   CNT A 208     -64.491  24.011  14.330  7.00  0.00           C  
ATOM   3704  C   CNT A 208     -65.819  24.275  13.980  5.00  0.00           C  
ATOM   3705  C   CNT A 208     -66.443  25.392  14.510  9.00  0.00           C  
ATOM   3706  C   CNT A 208     -67.875  25.569  14.330  4.00  0.00           C  
ATOM   3707  C   CNT A 208     -66.548  23.364  13.270  1.00  0.00           C  
ATOM   3708  C   CNT A 208     -67.924  23.379  13.380  8.00  0.00           C  
ATOM   3709  C   CNT A 208     -68.581  24.412  14.050  9.00  0.00           C  
ATOM   3710  C   CNT A 208     -69.833  24.281  14.570  8.00  0.00           C  
ATOM   3711  C   CNT A 208     -68.573  22.107  13.290  0.00  0.00           C  
ATOM   3712  C   CNT A 208     -69.669  21.916  14.130  1.00  0.00           C  
ATOM   3713  C   CNT A 208     -70.293  23.011  14.770  4.00  0.00           C  
ATOM   3714  C   CNT A 208     -71.219  22.809  15.850  3.00  0.00           C  
ATOM   3715  C   CNT A 208     -69.757  20.678  14.770  4.00  0.00           C  
ATOM   3716  C   CNT A 208     -70.323  20.529  16.020  0.00  0.00           C  
ATOM   3717  C   CNT A 208     -71.109  21.607  16.530  0.00  0.00           C  
ATOM   3718  C   CNT A 208     -71.244  21.645  17.940  8.00  0.00           C  
ATOM   3719  C   CNT A 208     -69.867  19.482  16.790  4.00  0.00           C  
ATOM   3720  C   CNT A 208     -69.843  19.665  18.150  2.00  0.00           C  
ATOM   3721  C   CNT A 208     -70.423  20.823  18.680  1.00  0.00           C  
ATOM   3722  C   CNT A 208     -70.003  21.269  19.960  3.00  0.00           C  
ATOM   3723  C   CNT A 208     -68.768  19.016  18.880  3.00  0.00           C  
ATOM   3724  C   CNT A 208     -68.115  19.727  19.880  7.00  0.00           C  
ATOM   3725  C   CNT A 208     -68.765  20.831  20.490  0.00  0.00           C  
ATOM   3726  C   CNT A 208     -68.033  21.774  21.200  6.00  0.00           C  
ATOM   3727  C   CNT A 208     -66.732  19.582  20.000  9.00  0.00           C  
ATOM   3728  C   CNT A 208     -66.008  20.709  20.420  4.00  0.00           C  
ATOM   3729  C   CNT A 208     -66.635  21.861  21.010  7.00  0.00           C  
ATOM   3730  C   CNT A 208     -65.943  23.061  21.050  8.00  0.00           C  
ATOM   3731  C   CNT A 208     -66.533  24.130  21.700  4.00  0.00           C  
ATOM   3732  C   CNT A 208     -66.108  25.449  21.380  8.00  0.00           C  
ATOM   3733  C   CNT A 208     -66.763  26.512  21.920  6.00  0.00           C  
ATOM   3734  C   CNT A 208     -66.451  27.825  21.440  0.00  0.00           C  
ATOM   3735  C   CNT A 208     -65.267  25.689  20.280  7.00  0.00           C  
ATOM   3736  C   CNT A 208     -65.230  26.900  19.550  8.00  0.00           C  
ATOM   3737  C   CNT A 208     -65.908  27.985  20.150  0.00  0.00           C  
ATOM   3738  C   CNT A 208     -66.457  29.028  19.330  1.00  0.00           C  
ATOM   3739  C   CNT A 208     -65.182  26.815  18.170  9.00  0.00           C  
ATOM   3740  C   CNT A 208     -66.020  27.611  17.390  5.00  0.00           C  
ATOM   3741  C   CNT A 208     -66.625  28.743  18.000  7.00  0.00           C  
ATOM   3742  C   CNT A 208     -67.706  29.302  17.340  7.00  0.00           C  
ATOM   3743  C   CNT A 208     -66.432  27.159  16.120  2.00  0.00           C  
ATOM   3744  C   CNT A 208     -67.729  27.582  15.690  9.00  0.00           C  
ATOM   3745  C   CNT A 208     -68.391  28.662  16.300  2.00  0.00           C  
ATOM   3746  C   CNT A 208     -69.763  28.857  16.140  2.00  0.00           C  
ATOM   3747  C   CNT A 208     -68.524  26.649  14.960  8.00  0.00           C  
ATOM   3748  C   CNT A 208     -69.916  26.644  15.110  6.00  0.00           C  
ATOM   3749  C   CNT A 208     -70.523  27.745  15.760  1.00  0.00           C  
ATOM   3750  C   CNT A 208     -71.777  27.549  16.310  0.00  0.00           C  
ATOM   3751  C   CNT A 208     -70.536  25.361  15.080  4.00  0.00           C  
ATOM   3752  C   CNT A 208     -71.590  25.135  15.970  7.00  0.00           C  
ATOM   3753  C   CNT A 208     -72.283  26.224  16.530  3.00  0.00           C  
ATOM   3754  C   CNT A 208     -73.130  26.109  17.640  6.00  0.00           C  
ATOM   3755  C   CNT A 208     -71.898  23.880  16.420  4.00  0.00           C  
ATOM   3756  C   CNT A 208     -72.461  23.731  17.730  1.00  0.00           C  
ATOM   3757  C   CNT A 208     -73.066  24.884  18.370  0.00  0.00           C  
ATOM   3758  C   CNT A 208     -73.223  24.936  19.760  3.00  0.00           C  
ATOM   3759  C   CNT A 208     -71.941  22.693  18.530  6.00  0.00           C  
ATOM   3760  C   CNT A 208     -71.712  23.046  19.860  6.00  0.00           C  
ATOM   3761  C   CNT A 208     -72.417  24.096  20.520  7.00  0.00           C  
ATOM   3762  C   CNT A 208     -71.990  24.545  21.780  8.00  0.00           C  
ATOM   3763  C   CNT A 208     -70.571  22.416  20.540  2.00  0.00           C  
ATOM   3764  C   CNT A 208     -70.012  23.105  21.600  1.00  0.00           C  
ATOM   3765  C   CNT A 208     -70.657  24.194  22.190  4.00  0.00           C  
ATOM   3766  C   CNT A 208     -69.888  25.080  22.910  8.00  0.00           C  
ATOM   3767  C   CNT A 208     -68.649  22.863  21.830  7.00  0.00           C  
ATOM   3768  C   CNT A 208     -67.855  23.976  22.230  5.00  0.00           C  
ATOM   3769  C   CNT A 208     -68.473  25.100  22.800  1.00  0.00           C  
ATOM   3770  C   CNT A 208     -67.801  26.314  22.790  4.00  0.00           C  
ATOM   3771  C   CNT A 208     -68.414  27.431  23.340  6.00  0.00           C  
ATOM   3772  C   CNT A 208     -67.866  28.699  23.210  0.00  0.00           C  
ATOM   3773  C   CNT A 208     -68.531  29.806  23.780  5.00  0.00           C  
ATOM   3774  C   CNT A 208     -68.342  31.104  23.270  3.00  0.00           C  
ATOM   3775  C   CNT A 208     -67.077  28.901  22.050  1.00  0.00           C  
ATOM   3776  C   CNT A 208     -67.365  30.103  21.350  1.00  0.00           C  
ATOM   3777  C   CNT A 208     -67.958  31.193  21.940  3.00  0.00           C  
ATOM   3778  C   CNT A 208     -68.357  32.260  21.110  8.00  0.00           C  
ATOM   3779  C   CNT A 208     -67.102  30.053  19.940  6.00  0.00           C  
ATOM   3780  C   CNT A 208     -67.878  30.942  19.120  0.00  0.00           C  
ATOM   3781  C   CNT A 208     -68.527  32.047  19.760  1.00  0.00           C  
ATOM   3782  C   CNT A 208     -69.606  32.655  19.090  8.00  0.00           C  
ATOM   3783  C   CNT A 208     -68.320  30.474  17.900  0.00  0.00           C  
ATOM   3784  C   CNT A 208     -69.554  30.867  17.450  9.00  0.00           C  
ATOM   3785  C   CNT A 208     -70.252  31.941  18.050  1.00  0.00           C  
ATOM   3786  C   CNT A 208     -71.605  32.167  17.740  6.00  0.00           C  
ATOM   3787  C   CNT A 208     -70.351  29.954  16.760  5.00  0.00           C  
ATOM   3788  C   CNT A 208     -71.750  29.877  17.070  0.00  0.00           C  
ATOM   3789  C   CNT A 208     -72.406  31.007  17.630  6.00  0.00           C  
ATOM   3790  C   CNT A 208     -73.758  30.884  18.080  6.00  0.00           C  
ATOM   3791  C   CNT A 208     -72.338  28.631  17.010  8.00  0.00           C  
ATOM   3792  C   CNT A 208     -73.504  28.483  17.750  7.00  0.00           C  
ATOM   3793  C   CNT A 208     -74.160  29.548  18.380  1.00  0.00           C  
ATOM   3794  C   CNT A 208     -75.079  29.428  19.450  1.00  0.00           C  
ATOM   3795  C   CNT A 208     -73.821  27.199  18.180  2.00  0.00           C  
ATOM   3796  C   CNT A 208     -74.329  27.084  19.540  9.00  0.00           C  
ATOM   3797  C   CNT A 208     -74.956  28.210  20.150  0.00  0.00           C  
ATOM   3798  C   CNT A 208     -74.932  28.303  21.540  0.00  0.00           C  
ATOM   3799  C   CNT A 208     -73.890  26.053  20.400  5.00  0.00           C  
ATOM   3800  C   CNT A 208     -73.592  26.341  21.730  5.00  0.00           C  
ATOM   3801  C   CNT A 208     -74.273  27.374  22.350  9.00  0.00           C  
ATOM   3802  C   CNT A 208     -73.864  27.712  23.700  0.00  0.00           C  
ATOM   3803  C   CNT A 208     -72.564  25.691  22.390  1.00  0.00           C  
ATOM   3804  C   CNT A 208     -71.914  26.381  23.410  2.00  0.00           C  
ATOM   3805  C   CNT A 208     -72.521  27.361  24.100  3.00  0.00           C  
ATOM   3806  C   CNT A 208     -71.676  28.317  24.750  4.00  0.00           C  
ATOM   3807  C   CNT A 208     -70.509  26.188  23.600  3.00  0.00           C  
ATOM   3808  C   CNT A 208     -69.725  27.288  23.960  2.00  0.00           C  
ATOM   3809  C   CNT A 208     -70.290  28.369  24.560  1.00  0.00           C  
ATOM   3810  C   CNT A 208     -69.654  29.643  24.550  1.00  0.00           C  
ATOM   3811  C   CNT A 208     -70.316  30.697  25.220  2.00  0.00           C  
ATOM   3812  C   CNT A 208     -69.679  31.978  25.090  5.00  0.00           C  
ATOM   3813  C   CNT A 208     -70.350  33.107  25.680  2.00  0.00           C  
ATOM   3814  C   CNT A 208     -70.146  34.437  25.130  1.00  0.00           C  
ATOM   3815  C   CNT A 208     -69.008  32.195  23.870  7.00  0.00           C  
ATOM   3816  C   CNT A 208     -69.131  33.358  23.130  9.00  0.00           C  
ATOM   3817  C   CNT A 208     -69.709  34.495  23.750  6.00  0.00           C  
ATOM   3818  C   CNT A 208     -70.277  35.522  22.980  2.00  0.00           C  
ATOM   3819  C   CNT A 208     -69.046  33.277  21.750  0.00  0.00           C  
ATOM   3820  C   CNT A 208     -69.780  34.222  20.900  2.00  0.00           C  
ATOM   3821  C   CNT A 208     -70.383  35.253  21.580  4.00  0.00           C  
ATOM   3822  C   CNT A 208     -71.407  35.923  20.880  1.00  0.00           C  
ATOM   3823  C   CNT A 208     -70.193  33.786  19.620  8.00  0.00           C  
ATOM   3824  C   CNT A 208     -71.430  34.257  19.080  7.00  0.00           C  
ATOM   3825  C   CNT A 208     -72.051  35.355  19.760  7.00  0.00           C  
ATOM   3826  C   CNT A 208     -73.433  35.463  19.650  4.00  0.00           C  
ATOM   3827  C   CNT A 208     -72.240  33.342  18.310  9.00  0.00           C  
ATOM   3828  C   CNT A 208     -73.638  33.253  18.640  5.00  0.00           C  
ATOM   3829  C   CNT A 208     -74.192  34.296  19.350  9.00  0.00           C  
ATOM   3830  C   CNT A 208     -75.487  34.225  19.910  0.00  0.00           C  
ATOM   3831  C   CNT A 208     -74.317  32.009  18.710  0.00  0.00           C  
ATOM   3832  C   CNT A 208     -75.480  31.820  19.480  0.00  0.00           C  
ATOM   3833  C   CNT A 208     -76.029  32.937  20.100  4.00  0.00           C  
ATOM   3834  C   CNT A 208     -76.839  32.798  21.320  1.00  0.00           C  
ATOM   3835  C   CNT A 208     -75.666  30.549  20.050  3.00  0.00           C  
ATOM   3836  C   CNT A 208     -76.083  30.448  21.430  2.00  0.00           C  
ATOM   3837  C   CNT A 208     -76.628  31.595  22.070  8.00  0.00           C  
ATOM   3838  C   CNT A 208     -76.698  31.620  23.470  0.00  0.00           C  
ATOM   3839  C   CNT A 208     -75.585  29.400  22.160  2.00  0.00           C  
ATOM   3840  C   CNT A 208     -75.464  29.550  23.560  9.00  0.00           C  
ATOM   3841  C   CNT A 208     -76.053  30.639  24.230  0.00  0.00           C  
ATOM   3842  C   CNT A 208     -75.528  31.208  25.460  4.00  0.00           C  
ATOM   3843  C   CNT A 208     -74.441  28.903  24.250  3.00  0.00           C  
ATOM   3844  C   CNT A 208     -73.753  29.618  25.240  4.00  0.00           C  
ATOM   3845  C   CNT A 208     -74.270  30.747  25.900  8.00  0.00           C  
ATOM   3846  C   CNT A 208     -73.464  31.633  26.640  8.00  0.00           C  
ATOM   3847  C   CNT A 208     -72.328  29.435  25.300  6.00  0.00           C  
ATOM   3848  C   CNT A 208     -71.613  30.570  25.670  3.00  0.00           C  
ATOM   3849  C   CNT A 208     -72.136  31.682  26.330  9.00  0.00           C  
ATOM   3850  C   CNT A 208     -71.445  32.889  26.500  0.00  0.00           C  
ATOM   3851  C   CNT A 208     -72.065  33.970  27.200  8.00  0.00           C  
ATOM   3852  C   CNT A 208     -71.670  35.287  26.830  0.00  0.00           C  
ATOM   3853  C   CNT A 208     -72.225  36.445  27.440  2.00  0.00           C  
ATOM   3854  C   CNT A 208     -71.890  37.729  26.960  8.00  0.00           C  
ATOM   3855  C   CNT A 208     -70.856  35.495  25.730  9.00  0.00           C  
ATOM   3856  C   CNT A 208     -70.992  36.690  24.980  1.00  0.00           C  
ATOM   3857  C   CNT A 208     -71.428  37.907  25.620  8.00  0.00           C  
ATOM   3858  C   CNT A 208     -71.541  38.998  24.610  6.00  0.00           C  
ATOM   3859  C   CNT A 208     -70.914  36.631  23.550  3.00  0.00           C  
ATOM   3860  C   CNT A 208     -71.605  37.507  22.750  1.00  0.00           C  
ATOM   3861  C   CNT A 208     -72.125  38.654  23.380  1.00  0.00           C  
ATOM   3862  C   CNT A 208     -73.221  39.194  22.670  4.00  0.00           C  
ATOM   3863  C   CNT A 208     -71.948  37.088  21.460  9.00  0.00           C  
ATOM   3864  C   CNT A 208     -73.233  37.491  21.010  6.00  0.00           C  
ATOM   3865  C   CNT A 208     -73.946  38.594  21.670  2.00  0.00           C  
ATOM   3866  C   CNT A 208     -75.280  38.796  21.320  6.00  0.00           C  
ATOM   3867  C   CNT A 208     -74.036  36.602  20.250  7.00  0.00           C  
ATOM   3868  C   CNT A 208     -75.483  36.658  20.310  3.00  0.00           C  
ATOM   3869  C   CNT A 208     -76.096  37.732  20.960  9.00  0.00           C  
ATOM   3870  C   CNT A 208     -77.485  37.514  21.210  7.00  0.00           C  
ATOM   3871  C   CNT A 208     -76.139  35.394  20.390  1.00  0.00           C  
ATOM   3872  C   CNT A 208     -77.179  35.200  21.370  7.00  0.00           C  
ATOM   3873  C   CNT A 208     -77.884  36.319  21.830  7.00  0.00           C  
ATOM   3874  C   CNT A 208     -78.486  36.112  23.090  5.00  0.00           C  
ATOM   3875  C   CNT A 208     -77.430  33.909  21.880  6.00  0.00           C  
ATOM   3876  C   CNT A 208     -77.705  33.854  23.250  3.00  0.00           C  
ATOM   3877  C   CNT A 208     -78.338  34.997  23.940  0.00  0.00           C  
ATOM   3878  C   CNT A 208     -78.736  34.747  25.210  6.00  0.00           C  
ATOM   3879  C   CNT A 208     -77.250  32.805  24.070  4.00  0.00           C  
ATOM   3880  C   CNT A 208     -77.233  32.955  25.440  0.00  0.00           C  
ATOM   3881  C   CNT A 208     -77.970  33.926  26.090  3.00  0.00           C  
ATOM   3882  C   CNT A 208     -77.621  34.133  27.440  4.00  0.00           C  
ATOM   3883  C   CNT A 208     -76.125  32.328  26.050  4.00  0.00           C  
ATOM   3884  C   CNT A 208     -75.493  32.914  27.110  4.00  0.00           C  
ATOM   3885  C   CNT A 208     -76.170  34.015  27.730  4.00  0.00           C  
ATOM   3886  C   CNT A 208     -75.327  34.899  28.450  1.00  0.00           C  
ATOM   3887  C   CNT A 208     -74.115  32.734  27.340  7.00  0.00           C  
ATOM   3888  C   CNT A 208     -73.292  33.815  27.820  1.00  0.00           C  
ATOM   3889  C   CNT A 208     -73.926  34.955  28.360  9.00  0.00           C  
ATOM   3890  C   CNT A 208     -73.209  36.157  28.410  1.00  0.00           C  
ATOM   3891  N   LIG A 209     -35.518 -19.761  -5.160  2.00  0.00           N  
ATOM   3892  N   LIG A 209     -45.433 -24.404  -7.710  4.00  0.00           N  
ATOM   3893  N   LIG A 209     -71.393  41.114  23.700  6.00  0.00           N  
ATOM   3894  N   LIG A 209     -77.970  34.657  29.620  1.00  0.00           N  
ATOM   3895  C   LIG A 209     -36.406 -20.591  -4.500  8.00  0.00           C  
ATOM   3896  C   LIG A 209     -44.930 -24.502  -6.420  7.00  0.00           C  
ATOM   3897  C   LIG A 209     -71.200  40.491  24.960  6.00  0.00           C  
ATOM   3898  C   LIG A 209     -78.647  34.457  28.450  1.00  0.00           C  
ATOM   3899  O   LIG A 209     -36.683 -21.566  -4.000  2.00  0.00           O  
ATOM   3900  O   LIG A 209     -44.535 -25.234  -5.620  0.00  0.00           O  
ATOM   3901  O   LIG A 209     -70.930  40.508  26.130  7.00  0.00           O  
ATOM   3902  O   LIG A 209     -79.679  34.523  27.900  9.00  0.00           O  
ATOM   3903  C1  LIG A 209     -34.025 -20.103  -5.100  5.00  0.00           C  
ATOM   3904  C1  LIG A 209     -46.426 -25.289  -8.300  7.00  0.00           C  
ATOM   3905  C1  LIG A 209     -70.802  42.389  23.330  8.00  0.00           C  
ATOM   3906  C1  LIG A 209     -78.696  34.844  30.870  5.00  0.00           C  
ATOM   3907  N1  LIG A 209     -34.097 -19.463  -2.620  7.00  0.00           N  
ATOM   3908  N1  LIG A 209     -47.428 -23.260  -9.500  5.00  0.00           N  
ATOM   3909  N1  LIG A 209     -71.604  41.917  21.040  5.00  0.00           N  
ATOM   3910  N1  LIG A 209     -78.255  32.410  31.590  3.00  0.00           N  
ATOM   3911  O1  LIG A 209     -37.291 -18.621   0.710  4.00  0.00           O  
ATOM   3912  O1  LIG A 209     -49.000 -19.260  -7.750  6.00  0.00           O  
ATOM   3913  O1  LIG A 209     -70.899  38.076  18.560  3.00  0.00           O  
ATOM   3914  O1  LIG A 209     -75.283  28.967  30.900  8.00  0.00           O  
ATOM   3915  C2  LIG A 209     -33.377 -19.363  -3.900  8.00  0.00           C  
ATOM   3916  C2  LIG A 209     -47.004 -24.663  -9.600  6.00  0.00           C  
ATOM   3917  C2  LIG A 209     -71.514  42.927  22.150  6.00  0.00           C  
ATOM   3918  C2  LIG A 209     -79.256  33.493  31.350  5.00  0.00           C  
ATOM   3919  N2  LIG A 209     -35.219 -20.405  -0.940  5.00  0.00           N  
ATOM   3920  N2  LIG A 209     -47.767 -21.140 -10.000  1.00  0.00           N  
ATOM   3921  N2  LIG A 209     -72.537  40.415  19.650  7.00  0.00           N  
ATOM   3922  N2  LIG A 209     -76.529  31.387  32.470  5.00  0.00           N  
ATOM   3923  C3  LIG A 209     -34.343 -20.673  -1.910  3.00  0.00           C  
ATOM   3924  C3  LIG A 209     -47.322 -22.294 -10.430  9.00  0.00           C  
ATOM   3925  C3  LIG A 209     -72.752  41.612  20.330  6.00  0.00           C  
ATOM   3926  C3  LIG A 209     -77.545  32.223  32.730  4.00  0.00           C  
ATOM   3927  N3  LIG A 209     -35.187 -17.255  -2.520  9.00  0.00           N  
ATOM   3928  N3  LIG A 209     -48.490 -23.193  -7.180  1.00  0.00           N  
ATOM   3929  N3  LIG A 209     -69.254  40.979  20.890  4.00  0.00           N  
ATOM   3930  N3  LIG A 209     -78.371  31.159  29.450  1.00  0.00           N  
ATOM   3931  C4  LIG A 209     -35.523 -19.064  -0.960  9.00  0.00           C  
ATOM   3932  C4  LIG A 209     -48.267 -21.315  -8.710  2.00  0.00           C  
ATOM   3933  C4  LIG A 209     -71.239  40.077  19.860  0.00  0.00           C  
ATOM   3934  C4  LIG A 209     -76.800  30.805  31.250  5.00  0.00           C  
ATOM   3935  N4  LIG A 209     -36.675 -17.055  -0.680  8.00  0.00           N  
ATOM   3936  N4  LIG A 209     -49.168 -21.041  -6.610  3.00  0.00           N  
ATOM   3937  N4  LIG A 209     -69.173  38.911  19.790  1.00  0.00           N  
ATOM   3938  N4  LIG A 209     -76.755  29.423  29.340  3.00  0.00           N  
ATOM   3939  C5  LIG A 209     -34.922 -18.508  -2.000  3.00  0.00           C  
ATOM   3940  C5  LIG A 209     -48.137 -22.664  -8.460  4.00  0.00           C  
ATOM   3941  C5  LIG A 209     -70.665  40.948  20.720  5.00  0.00           C  
ATOM   3942  C5  LIG A 209     -77.879  31.448  30.750  5.00  0.00           C  
ATOM   3943  N5  LIG A 209     -36.465 -15.405  -2.130  7.00  0.00           N  
ATOM   3944  N5  LIG A 209     -49.472 -22.619  -5.150  5.00  0.00           N  
ATOM   3945  N5  LIG A 209     -67.414  39.672  20.710  3.00  0.00           N  
ATOM   3946  N5  LIG A 209     -78.533  29.437  28.010  3.00  0.00           N  
ATOM   3947  C6  LIG A 209     -36.577 -18.282  -0.230  8.00  0.00           C  
ATOM   3948  C6  LIG A 209     -48.877 -20.434  -7.720  7.00  0.00           C  
ATOM   3949  C6  LIG A 209     -70.439  38.931  19.300  8.00  0.00           C  
ATOM   3950  C6  LIG A 209     -76.212  29.635  30.520  3.00  0.00           C  
ATOM   3951  C7  LIG A 209     -36.028 -16.568  -1.740  1.00  0.00           C  
ATOM   3952  C7  LIG A 209     -48.989 -22.291  -6.350  3.00  0.00           C  
ATOM   3953  C7  LIG A 209     -68.650  39.941  20.420  1.00  0.00           C  
ATOM   3954  C7  LIG A 209     -77.782  30.120  28.910  8.00  0.00           C  
ATOM   3955  H   LIG A 209     -35.738 -18.775  -5.240  0.00  0.00           H  
ATOM   3956  H   LIG A 209     -45.690 -23.441  -7.990  3.00  0.00           H  
ATOM   3957  H   LIG A 209     -71.386  40.424  22.890  8.00  0.00           H  
ATOM   3958  H   LIG A 209     -77.147  34.179  29.740  7.00  0.00           H  
ATOM   3959  H1  LIG A 209     -33.519 -19.881  -6.020  4.00  0.00           H  
ATOM   3960  H1  LIG A 209     -47.298 -25.514  -7.650  5.00  0.00           H  
ATOM   3961  H1  LIG A 209     -69.780  42.103  23.060  7.00  0.00           H  
ATOM   3962  H1  LIG A 209     -79.476  35.592  30.750  4.00  0.00           H  
ATOM   3963  H2  LIG A 209     -33.989 -21.182  -4.820  4.00  0.00           H  
ATOM   3964  H2  LIG A 209     -46.048 -26.245  -8.540  8.00  0.00           H  
ATOM   3965  H2  LIG A 209     -70.717  43.148  24.100  1.00  0.00           H  
ATOM   3966  H2  LIG A 209     -78.006  35.283  31.530  5.00  0.00           H  
ATOM   3967  H3  LIG A 209     -33.322 -18.316  -4.240  7.00  0.00           H  
ATOM   3968  H3  LIG A 209     -47.877 -25.287 -10.060  9.00  0.00           H  
ATOM   3969  H3  LIG A 209     -70.804  43.682  21.810  5.00  0.00           H  
ATOM   3970  H3  LIG A 209     -80.059  33.072  30.650  5.00  0.00           H  
ATOM   3971  H4  LIG A 209     -32.315 -19.573  -3.780  9.00  0.00           H  
ATOM   3972  H4  LIG A 209     -46.213 -24.668 -10.360  2.00  0.00           H  
ATOM   3973  H4  LIG A 209     -72.494  43.263  22.440  7.00  0.00           H  
ATOM   3974  H4  LIG A 209     -79.621  33.704  32.340  6.00  0.00           H  
ATOM   3975  H5  LIG A 209     -33.889 -21.625  -2.110  3.00  0.00           H  
ATOM   3976  H5  LIG A 209     -46.762 -22.340 -11.400  9.00  0.00           H  
ATOM   3977  H5  LIG A 209     -73.716  42.182  20.400  8.00  0.00           H  
ATOM   3978  H5  LIG A 209     -77.684  32.798  33.660  5.00  0.00           H  
ATOM   3979  H6  LIG A 209     -37.435 -16.464  -0.210  0.00  0.00           H  
ATOM   3980  H6  LIG A 209     -49.493 -20.529  -5.890  8.00  0.00           H  
ATOM   3981  H6  LIG A 209     -68.545  38.150  19.500  9.00  0.00           H  
ATOM   3982  H6  LIG A 209     -76.366  28.812  28.680  6.00  0.00           H  
ATOM   3983  H7  LIG A 209     -36.340 -15.188  -3.100  9.00  0.00           H  
ATOM   3984  H7  LIG A 209     -49.031 -23.466  -4.780  0.00  0.00           H  
ATOM   3985  H7  LIG A 209     -66.707  39.438  19.990  0.00  0.00           H  
ATOM   3986  H7  LIG A 209     -78.043  28.721  27.500  7.00  0.00           H  
ATOM   3987  H8  LIG A 209     -37.308 -15.033  -1.690  6.00  0.00           H  
ATOM   3988  H8  LIG A 209     -49.398 -21.889  -4.460  9.00  0.00           H  
ATOM   3989  H8  LIG A 209     -66.997  40.357  21.380  8.00  0.00           H  
ATOM   3990  H8  LIG A 209     -79.323  29.970  27.600  3.00  0.00           H  
END
