# Supplementary material for: Molecular Dynamics Study of the Interaction of Carbon Nanotubes with Telomeric DNA Fragment Containing Noncanonical G-Quadruplex and i-Motif Forms
Source: Int J Mol Sci. 2020 Mar 11;21(6):1925. doi: 10.3390/ijms21061925 (PMC7139311; doi:10.3390/ijms21061925)
Supplement: Supplementary file 1 [file ijms-21-01925-s001.zip › fig3_A.pdb]

HEADER    a10x
ATOM      1  C5' DG5 A   1     -48.703   3.340  30.720  9.00  0.00           C  
ATOM      2  O5' DG5 A   1     -48.036   2.405  31.560  2.00  0.00           O  
ATOM      3  C4' DG5 A   1     -47.689   4.377  30.290  3.00  0.00           C  
ATOM      4  O4' DG5 A   1     -47.239   4.923  31.520  8.00  0.00           O  
ATOM      5  C3' DG5 A   1     -46.511   3.763  29.530  1.00  0.00           C  
ATOM      6  O3' DG5 A   1     -46.233   4.239  28.160  0.00  0.00           O  
ATOM      7  C2' DG5 A   1     -45.398   3.950  30.560  1.00  0.00           C  
ATOM      8  C1' DG5 A   1     -45.875   5.244  31.200  1.00  0.00           C  
ATOM      9  N1  DG5 A   1     -42.725   8.715  33.150  4.00  0.00           N  
ATOM     10  C2  DG5 A   1     -43.132   8.525  31.840  7.00  0.00           C  
ATOM     11  N2  DG5 A   1     -42.698   9.461  31.050  2.00  0.00           N  
ATOM     12  N3  DG5 A   1     -44.092   7.702  31.540  1.00  0.00           N  
ATOM     13  C4  DG5 A   1     -44.265   6.744  32.480  0.00  0.00           C  
ATOM     14  C5  DG5 A   1     -43.818   6.722  33.760  6.00  0.00           C  
ATOM     15  C6  DG5 A   1     -43.021   7.862  34.180  4.00  0.00           C  
ATOM     16  O6  DG5 A   1     -42.692   8.214  35.340  2.00  0.00           O  
ATOM     17  N7  DG5 A   1     -44.262   5.600  34.490  4.00  0.00           N  
ATOM     18  C8  DG5 A   1     -44.957   4.925  33.590  1.00  0.00           C  
ATOM     19  N9  DG5 A   1     -45.094   5.634  32.390  8.00  0.00           N  
ATOM     20 HO5' DG5 A   1     -48.053   2.868  32.450  0.00  0.00           H  
ATOM     21  H1  DG5 A   1     -42.245   9.598  33.340  0.00  0.00           H  
ATOM     22  H8  DG5 A   1     -45.571   4.093  33.820  0.00  0.00           H  
ATOM     23  H1' DG5 A   1     -45.856   5.973  30.340  0.00  0.00           H  
ATOM     24  H2' DG5 A   1     -45.304   3.069  31.280  4.00  0.00           H  
ATOM     25  H21 DG5 A   1     -41.928  10.082  31.210  8.00  0.00           H  
ATOM     26  H3' DG5 A   1     -46.643   2.672  29.430  2.00  0.00           H  
ATOM     27  H22 DG5 A   1     -43.053   9.434  30.100  1.00  0.00           H  
ATOM     28  H4' DG5 A   1     -48.219   5.176  29.720  4.00  0.00           H  
ATOM     29  H5' DG5 A   1     -49.543   3.856  31.250  0.00  0.00           H  
ATOM     30 H2'' DG5 A   1     -44.458   4.160  29.990  6.00  0.00           H  
ATOM     31 H5'' DG5 A   1     -49.048   2.866  29.860  7.00  0.00           H  
ATOM     32  P    DG A   2     -45.032   3.693  27.240  8.00  0.00           P  
ATOM     33  C5'  DG A   2     -43.948   6.014  26.950  9.00  0.00           C  
ATOM     34  O5'  DG A   2     -43.914   4.698  27.440  7.00  0.00           O  
ATOM     35  C4'  DG A   2     -42.772   6.978  27.160  8.00  0.00           C  
ATOM     36  O4'  DG A   2     -42.492   7.011  28.620  8.00  0.00           O  
ATOM     37  C3'  DG A   2     -41.537   6.395  26.440  5.00  0.00           C  
ATOM     38  O3'  DG A   2     -40.995   7.454  25.750  3.00  0.00           O  
ATOM     39  C2'  DG A   2     -40.647   5.936  27.620  0.00  0.00           C  
ATOM     40  C1'  DG A   2     -41.101   6.842  28.750  3.00  0.00           C  
ATOM     41  N1   DG A   2     -38.042   6.838  32.830  2.00  0.00           N  
ATOM     42  C2   DG A   2     -38.030   7.596  31.760  2.00  0.00           C  
ATOM     43  N2   DG A   2     -37.170   8.575  31.680  8.00  0.00           N  
ATOM     44  N3   DG A   2     -38.985   7.582  30.810  8.00  0.00           N  
ATOM     45  C4   DG A   2     -39.883   6.584  30.950  8.00  0.00           C  
ATOM     46  C5   DG A   2     -40.096   5.781  32.050  1.00  0.00           C  
ATOM     47  C6   DG A   2     -39.099   5.929  33.090  2.00  0.00           C  
ATOM     48  O6   DG A   2     -39.023   5.355  34.210  0.00  0.00           O  
ATOM     49  N7   DG A   2     -41.227   4.896  31.820  6.00  0.00           N  
ATOM     50  C8   DG A   2     -41.528   5.204  30.580  1.00  0.00           C  
ATOM     51  N9   DG A   2     -40.848   6.253  30.040  1.00  0.00           N  
ATOM     52  OP1  DG A   2     -45.457   3.782  25.850  5.00  0.00           O  
ATOM     53  OP2  DG A   2     -44.672   2.358  27.760  0.00  0.00           O1-
ATOM     54  H1   DG A   2     -37.381   6.954  33.590  5.00  0.00           H  
ATOM     55  H8   DG A   2     -42.423   4.869  30.110  8.00  0.00           H  
ATOM     56  H1'  DG A   2     -40.535   7.788  28.650  2.00  0.00           H  
ATOM     57  H2'  DG A   2     -40.710   4.814  27.800  6.00  0.00           H  
ATOM     58  H21  DG A   2     -36.542   8.600  32.510  0.00  0.00           H  
ATOM     59  H3'  DG A   2     -41.837   5.569  25.780  6.00  0.00           H  
ATOM     60  H22  DG A   2     -37.087   9.317  30.860  8.00  0.00           H  
ATOM     61  H4'  DG A   2     -42.862   7.944  26.790  6.00  0.00           H  
ATOM     62  H5'  DG A   2     -44.652   6.632  27.490  9.00  0.00           H  
ATOM     63 H2''  DG A   2     -39.585   6.018  27.390  7.00  0.00           H  
ATOM     64 H5''  DG A   2     -44.329   6.000  25.880  8.00  0.00           H  
ATOM     65  P    DG A   3     -39.627   7.351  24.890  8.00  0.00           P  
ATOM     66  C5'  DG A   3     -37.710   8.554  26.270  8.00  0.00           C  
ATOM     67  O5'  DG A   3     -38.345   7.340  25.810  5.00  0.00           O  
ATOM     68  C4'  DG A   3     -36.495   8.324  27.200  0.00  0.00           C  
ATOM     69  O4'  DG A   3     -36.865   7.557  28.270  5.00  0.00           O  
ATOM     70  C3'  DG A   3     -35.485   7.488  26.360  9.00  0.00           C  
ATOM     71  O3'  DG A   3     -34.438   8.313  26.080  4.00  0.00           O  
ATOM     72  C2'  DG A   3     -35.261   6.266  27.230  7.00  0.00           C  
ATOM     73  C1'  DG A   3     -35.710   6.891  28.610  3.00  0.00           C  
ATOM     74  N1   DG A   3     -34.166   4.744  33.100  8.00  0.00           N  
ATOM     75  C2   DG A   3     -33.567   5.773  32.370  6.00  0.00           C  
ATOM     76  N2   DG A   3     -32.772   6.637  32.980  9.00  0.00           N  
ATOM     77  N3   DG A   3     -34.090   6.205  31.220  1.00  0.00           N  
ATOM     78  C4   DG A   3     -35.264   5.588  30.830  1.00  0.00           C  
ATOM     79  C5   DG A   3     -35.854   4.591  31.540  0.00  0.00           C  
ATOM     80  C6   DG A   3     -35.269   4.065  32.710  0.00  0.00           C  
ATOM     81  O6   DG A   3     -35.614   3.106  33.440  4.00  0.00           O  
ATOM     82  N7   DG A   3     -36.890   4.134  30.760  8.00  0.00           N  
ATOM     83  C8   DG A   3     -36.880   4.883  29.720  3.00  0.00           C  
ATOM     84  N9   DG A   3     -35.921   5.809  29.650  1.00  0.00           N  
ATOM     85  OP1  DG A   3     -39.486   8.546  24.020  1.00  0.00           O  
ATOM     86  OP2  DG A   3     -39.624   6.062  24.200  5.00  0.00           O1-
ATOM     87  H1   DG A   3     -33.814   4.538  33.990  1.00  0.00           H  
ATOM     88  H8   DG A   3     -37.656   4.889  28.990  4.00  0.00           H  
ATOM     89  H1'  DG A   3     -34.840   7.599  28.930  3.00  0.00           H  
ATOM     90  H2'  DG A   3     -36.004   5.477  26.990  6.00  0.00           H  
ATOM     91  H21  DG A   3     -32.536   6.568  33.950  9.00  0.00           H  
ATOM     92  H3'  DG A   3     -35.872   7.282  25.370  9.00  0.00           H  
ATOM     93  H22  DG A   3     -32.330   7.348  32.380  6.00  0.00           H  
ATOM     94  H4'  DG A   3     -36.141   9.291  27.480  2.00  0.00           H  
ATOM     95  H5'  DG A   3     -38.373   9.183  26.750  7.00  0.00           H  
ATOM     96 H2''  DG A   3     -34.226   5.973  27.170  8.00  0.00           H  
ATOM     97 H5''  DG A   3     -37.355   9.078  25.410  5.00  0.00           H  
ATOM     98  P    DT A   4     -33.222   7.775  25.200  8.00  0.00           P  
ATOM     99  C5'  DT A   4     -31.483   8.643  27.010  3.00  0.00           C  
ATOM    100  O5'  DT A   4     -32.151   7.553  26.360  8.00  0.00           O  
ATOM    101  C4'  DT A   4     -30.659   8.174  28.180  3.00  0.00           C  
ATOM    102  O4'  DT A   4     -31.361   7.223  28.900  9.00  0.00           O  
ATOM    103  C3'  DT A   4     -29.364   7.469  27.650  0.00  0.00           C  
ATOM    104  O3'  DT A   4     -28.275   8.378  27.850  6.00  0.00           O  
ATOM    105  C2'  DT A   4     -29.294   6.241  28.430  6.00  0.00           C  
ATOM    106  C1'  DT A   4     -30.440   6.333  29.470  3.00  0.00           C  
ATOM    107  N1   DT A   4     -31.072   5.034  29.810  9.00  0.00           N  
ATOM    108  C2   DT A   4     -30.768   4.461  31.040  0.00  0.00           C  
ATOM    109  O2   DT A   4     -29.867   4.900  31.740  5.00  0.00           O  
ATOM    110  N3   DT A   4     -31.454   3.361  31.400  7.00  0.00           N  
ATOM    111  C4   DT A   4     -32.569   2.879  30.810  4.00  0.00           C  
ATOM    112  O4   DT A   4     -33.278   2.018  31.420  8.00  0.00           O  
ATOM    113  C5   DT A   4     -32.755   3.478  29.400  6.00  0.00           C  
ATOM    114  C6   DT A   4     -31.945   4.458  28.950  8.00  0.00           C  
ATOM    115  C7   DT A   4     -33.836   2.914  28.490  9.00  0.00           C  
ATOM    116  OP1  DT A   4     -32.809   8.939  24.450  0.00  0.00           O  
ATOM    117  OP2  DT A   4     -33.704   6.573  24.540  5.00  0.00           O1-
ATOM    118  H3   DT A   4     -31.281   2.862  32.320  9.00  0.00           H  
ATOM    119  H6   DT A   4     -32.102   4.815  27.980  1.00  0.00           H  
ATOM    120  H1'  DT A   4     -30.030   6.764  30.370  4.00  0.00           H  
ATOM    121  H2'  DT A   4     -29.373   5.429  27.780  5.00  0.00           H  
ATOM    122  H3'  DT A   4     -29.499   7.347  26.560  5.00  0.00           H  
ATOM    123  H4'  DT A   4     -30.388   9.062  28.800  1.00  0.00           H  
ATOM    124  H5'  DT A   4     -32.221   9.311  27.410  6.00  0.00           H  
ATOM    125  H71  DT A   4     -33.826   3.429  27.570  7.00  0.00           H  
ATOM    126  H72  DT A   4     -33.714   1.856  28.480  4.00  0.00           H  
ATOM    127  H73  DT A   4     -34.771   3.179  29.040  7.00  0.00           H  
ATOM    128 H2''  DT A   4     -28.373   6.005  28.850  1.00  0.00           H  
ATOM    129 H5''  DT A   4     -30.936   9.256  26.270  1.00  0.00           H  
ATOM    130  P    DT A   5     -26.802   8.100  27.390  6.00  0.00           P  
ATOM    131  C5'  DT A   5     -25.551   7.432  29.780  2.00  0.00           C  
ATOM    132  O5'  DT A   5     -26.176   7.073  28.500  2.00  0.00           O  
ATOM    133  C4'  DT A   5     -24.968   6.193  30.450  3.00  0.00           C  
ATOM    134  O4'  DT A   5     -26.133   5.389  30.680  9.00  0.00           O  
ATOM    135  C3'  DT A   5     -23.907   5.485  29.620  4.00  0.00           C  
ATOM    136  O3'  DT A   5     -22.886   4.956  30.440  3.00  0.00           O  
ATOM    137  C2'  DT A   5     -24.764   4.407  29.000  5.00  0.00           C  
ATOM    138  C1'  DT A   5     -25.758   4.080  30.090  2.00  0.00           C  
ATOM    139  N1   DT A   5     -26.958   3.284  29.700  9.00  0.00           N  
ATOM    140  C2   DT A   5     -27.435   2.419  30.700  4.00  0.00           C  
ATOM    141  O2   DT A   5     -26.851   2.016  31.750  0.00  0.00           O  
ATOM    142  N3   DT A   5     -28.634   1.812  30.380  7.00  0.00           N  
ATOM    143  C4   DT A   5     -29.218   1.808  29.130  1.00  0.00           C  
ATOM    144  O4   DT A   5     -30.237   1.090  28.950  4.00  0.00           O  
ATOM    145  C5   DT A   5     -28.712   2.781  28.230  6.00  0.00           C  
ATOM    146  C6   DT A   5     -27.594   3.484  28.520  4.00  0.00           C  
ATOM    147  C7   DT A   5     -29.352   2.961  26.850  5.00  0.00           C  
ATOM    148  OP1  DT A   5     -26.156   9.398  27.440  8.00  0.00           O  
ATOM    149  OP2  DT A   5     -26.827   7.467  26.110  1.00  0.00           O1-
ATOM    150  H3   DT A   5     -29.013   1.233  31.060  0.00  0.00           H  
ATOM    151  H6   DT A   5     -27.219   4.190  27.880  9.00  0.00           H  
ATOM    152  H1'  DT A   5     -25.296   3.500  30.860  7.00  0.00           H  
ATOM    153  H2'  DT A   5     -25.136   4.777  28.100  9.00  0.00           H  
ATOM    154  H3'  DT A   5     -23.510   6.093  28.770  5.00  0.00           H  
ATOM    155  H4'  DT A   5     -24.488   6.507  31.370  7.00  0.00           H  
ATOM    156  H5'  DT A   5     -26.274   7.944  30.380  0.00  0.00           H  
ATOM    157  H71  DT A   5     -29.008   3.846  26.460  3.00  0.00           H  
ATOM    158  H72  DT A   5     -29.251   2.111  26.130  0.00  0.00           H  
ATOM    159  H73  DT A   5     -30.480   2.938  26.980  4.00  0.00           H  
ATOM    160 H2''  DT A   5     -24.099   3.579  28.690  5.00  0.00           H  
ATOM    161 H5''  DT A   5     -24.670   8.083  29.650  2.00  0.00           H  
ATOM    162  P    DA A   6     -21.414   4.748  29.980  4.00  0.00           P  
ATOM    163  C5'  DA A   6     -20.746   2.144  29.920  8.00  0.00           C  
ATOM    164  O5'  DA A   6     -21.298   3.296  29.290  0.00  0.00           O  
ATOM    165  C4'  DA A   6     -21.662   1.708  31.070  3.00  0.00           C  
ATOM    166  O4'  DA A   6     -23.049   1.732  30.660  0.00  0.00           O  
ATOM    167  C3'  DA A   6     -21.204   0.319  31.410  1.00  0.00           C  
ATOM    168  O3'  DA A   6     -21.231   0.098  32.730  6.00  0.00           O  
ATOM    169  C2'  DA A   6     -22.392  -0.468  30.860  6.00  0.00           C  
ATOM    170  C1'  DA A   6     -23.608   0.535  31.190  7.00  0.00           C  
ATOM    171  N1   DA A   6     -27.968  -2.205  31.120  4.00  0.00           N  
ATOM    172  C2   DA A   6     -27.101  -1.976  32.120  2.00  0.00           C  
ATOM    173  N3   DA A   6     -26.010  -1.241  32.110  9.00  0.00           N  
ATOM    174  C4   DA A   6     -25.774  -0.790  30.800  6.00  0.00           C  
ATOM    175  C5   DA A   6     -26.635  -0.889  29.730  0.00  0.00           C  
ATOM    176  C6   DA A   6     -27.758  -1.648  30.000  2.00  0.00           C  
ATOM    177  N6   DA A   6     -28.655  -1.953  29.040  8.00  0.00           N  
ATOM    178  N7   DA A   6     -26.097  -0.230  28.610  6.00  0.00           N  
ATOM    179  C8   DA A   6     -24.966   0.293  29.090  0.00  0.00           C  
ATOM    180  N9   DA A   6     -24.687  -0.020  30.360  3.00  0.00           N  
ATOM    181  OP1  DA A   6     -20.553   4.806  31.160  0.00  0.00           O  
ATOM    182  OP2  DA A   6     -21.049   5.707  28.940  0.00  0.00           O1-
ATOM    183  H2   DA A   6     -27.413  -2.392  33.060  5.00  0.00           H  
ATOM    184  H8   DA A   6     -24.315   0.891  28.480  1.00  0.00           H  
ATOM    185  H1'  DA A   6     -23.827   0.601  32.230  1.00  0.00           H  
ATOM    186  H2'  DA A   6     -22.467  -0.636  29.730  5.00  0.00           H  
ATOM    187  H3'  DA A   6     -20.240   0.133  31.040  6.00  0.00           H  
ATOM    188  H4'  DA A   6     -21.485   2.388  31.940  2.00  0.00           H  
ATOM    189  H5'  DA A   6     -19.732   2.236  30.280  9.00  0.00           H  
ATOM    190  H61  DA A   6     -29.399  -2.519  29.240  5.00  0.00           H  
ATOM    191  H62  DA A   6     -28.542  -1.499  28.150  4.00  0.00           H  
ATOM    192 H2''  DA A   6     -22.504  -1.443  31.460  5.00  0.00           H  
ATOM    193 H5''  DA A   6     -20.771   1.424  29.160  6.00  0.00           H  
ATOM    194  P    DG A   7     -20.188  -0.957  33.510  1.00  0.00           P  
ATOM    195  C5'  DG A   7     -21.842  -2.825  33.970  6.00  0.00           C  
ATOM    196  O5'  DG A   7     -20.703  -2.406  33.270  7.00  0.00           O  
ATOM    197  C4'  DG A   7     -22.249  -4.240  33.610  2.00  0.00           C  
ATOM    198  O4'  DG A   7     -23.402  -4.304  32.820  4.00  0.00           O  
ATOM    199  C3'  DG A   7     -21.190  -5.099  32.870  6.00  0.00           C  
ATOM    200  O3'  DG A   7     -21.416  -6.454  33.110  9.00  0.00           O  
ATOM    201  C2'  DG A   7     -21.602  -4.891  31.430  6.00  0.00           C  
ATOM    202  C1'  DG A   7     -23.114  -4.965  31.580  2.00  0.00           C  
ATOM    203  N1   DG A   7     -27.560  -5.723  29.120  9.00  0.00           N  
ATOM    204  C2   DG A   7     -27.087  -6.223  30.270  4.00  0.00           C  
ATOM    205  N2   DG A   7     -27.670  -7.216  30.890  6.00  0.00           N  
ATOM    206  N3   DG A   7     -25.908  -5.948  30.800  1.00  0.00           N  
ATOM    207  C4   DG A   7     -25.186  -5.008  30.120  6.00  0.00           C  
ATOM    208  C5   DG A   7     -25.585  -4.369  28.920  9.00  0.00           C  
ATOM    209  C6   DG A   7     -26.866  -4.763  28.360  2.00  0.00           C  
ATOM    210  O6   DG A   7     -27.506  -4.328  27.440  1.00  0.00           O  
ATOM    211  N7   DG A   7     -24.582  -3.444  28.490  4.00  0.00           N  
ATOM    212  C8   DG A   7     -23.681  -3.587  29.500  4.00  0.00           C  
ATOM    213  N9   DG A   7     -23.910  -4.569  30.420  0.00  0.00           N  
ATOM    214  OP1  DG A   7     -20.307  -0.783  34.930  4.00  0.00           O  
ATOM    215  OP2  DG A   7     -18.834  -0.775  32.930  9.00  0.00           O1-
ATOM    216  H1   DG A   7     -28.345  -6.192  28.710  6.00  0.00           H  
ATOM    217  H8   DG A   7     -22.716  -3.112  29.480  0.00  0.00           H  
ATOM    218  H1'  DG A   7     -23.387  -6.015  31.680  2.00  0.00           H  
ATOM    219  H2'  DG A   7     -21.382  -3.884  31.100  2.00  0.00           H  
ATOM    220  H21  DG A   7     -28.469  -7.688  30.510  9.00  0.00           H  
ATOM    221  H3'  DG A   7     -20.219  -4.798  33.060  1.00  0.00           H  
ATOM    222  H22  DG A   7     -27.055  -7.670  31.560  8.00  0.00           H  
ATOM    223  H4'  DG A   7     -22.522  -4.744  34.480  6.00  0.00           H  
ATOM    224  H5'  DG A   7     -22.680  -2.119  33.700  7.00  0.00           H  
ATOM    225 H2''  DG A   7     -21.181  -5.559  30.720  4.00  0.00           H  
ATOM    226 H5''  DG A   7     -21.601  -2.920  35.020  1.00  0.00           H  
ATOM    227  P    DG A   8     -20.181  -7.529  33.110  8.00  0.00           P  
ATOM    228  C5'  DG A   8     -21.704  -9.423  34.180  5.00  0.00           C  
ATOM    229  O5'  DG A   8     -21.027  -8.942  33.020  5.00  0.00           O  
ATOM    230  C4'  DG A   8     -22.827 -10.510  33.770  0.00  0.00           C  
ATOM    231  O4'  DG A   8     -23.762  -9.766  33.020  2.00  0.00           O  
ATOM    232  C3'  DG A   8     -22.222 -11.664  32.850  3.00  0.00           C  
ATOM    233  O3'  DG A   8     -22.853 -12.948  33.080  9.00  0.00           O  
ATOM    234  C2'  DG A   8     -22.463 -11.125  31.440  2.00  0.00           C  
ATOM    235  C1'  DG A   8     -23.735 -10.381  31.690  1.00  0.00           C  
ATOM    236  N1   DG A   8     -26.382  -8.842  27.740  0.00  0.00           N  
ATOM    237  C2   DG A   8     -26.696  -9.780  28.660  4.00  0.00           C  
ATOM    238  N2   DG A   8     -27.631 -10.615  28.350  7.00  0.00           N  
ATOM    239  N3   DG A   8     -25.932 -10.036  29.710  7.00  0.00           N  
ATOM    240  C4   DG A   8     -24.868  -9.188  29.790  3.00  0.00           C  
ATOM    241  C5   DG A   8     -24.466  -8.227  28.920  5.00  0.00           C  
ATOM    242  C6   DG A   8     -25.331  -7.999  27.780  6.00  0.00           C  
ATOM    243  O6   DG A   8     -25.300  -7.250  26.800  3.00  0.00           O  
ATOM    244  N7   DG A   8     -23.210  -7.682  29.340  2.00  0.00           N  
ATOM    245  C8   DG A   8     -22.946  -8.355  30.390  8.00  0.00           C  
ATOM    246  N9   DG A   8     -23.885  -9.267  30.730  4.00  0.00           N  
ATOM    247  OP1  DG A   8     -19.389  -7.524  34.330  3.00  0.00           O  
ATOM    248  OP2  DG A   8     -19.404  -7.432  31.860  0.00  0.00           O1-
ATOM    249  H1   DG A   8     -27.000  -8.817  26.940  1.00  0.00           H  
ATOM    250  H8   DG A   8     -22.018  -8.235  30.960  2.00  0.00           H  
ATOM    251  H1'  DG A   8     -24.574 -11.042  31.590  9.00  0.00           H  
ATOM    252  H2'  DG A   8     -21.621 -10.571  31.120  5.00  0.00           H  
ATOM    253  H21  DG A   8     -28.375 -10.380  27.680  7.00  0.00           H  
ATOM    254  H3'  DG A   8     -21.146 -11.732  33.010  8.00  0.00           H  
ATOM    255  H22  DG A   8     -27.717 -11.333  29.070  7.00  0.00           H  
ATOM    256  H4'  DG A   8     -23.259 -10.891  34.720  9.00  0.00           H  
ATOM    257  H5'  DG A   8     -22.226  -8.602  34.670  7.00  0.00           H  
ATOM    258 H2''  DG A   8     -22.749 -11.921  30.750  9.00  0.00           H  
ATOM    259 H5''  DG A   8     -20.925  -9.896  34.790  4.00  0.00           H  
ATOM    260  P    DG A   9     -22.320 -14.255  32.520  8.00  0.00           P  
ATOM    261  C5'  DG A   9     -24.694 -14.605  31.320  4.00  0.00           C  
ATOM    262  O5'  DG A   9     -23.286 -14.478  31.250  3.00  0.00           O  
ATOM    263  C4'  DG A   9     -25.458 -14.770  29.950  6.00  0.00           C  
ATOM    264  O4'  DG A   9     -25.546 -13.540  29.290  0.00  0.00           O  
ATOM    265  C3'  DG A   9     -24.765 -15.810  29.030  9.00  0.00           C  
ATOM    266  O3'  DG A   9     -25.750 -16.685  28.610  4.00  0.00           O  
ATOM    267  C2'  DG A   9     -24.267 -14.891  27.910  5.00  0.00           C  
ATOM    268  C1'  DG A   9     -25.298 -13.777  27.940  3.00  0.00           C  
ATOM    269  N1   DG A   9     -25.802 -10.911  23.810  0.00  0.00           N  
ATOM    270  C2   DG A   9     -26.423 -11.972  24.200  3.00  0.00           C  
ATOM    271  N2   DG A   9     -27.323 -12.471  23.450  4.00  0.00           N  
ATOM    272  N3   DG A   9     -26.192 -12.713  25.260  3.00  0.00           N  
ATOM    273  C4   DG A   9     -25.290 -12.119  26.060  1.00  0.00           C  
ATOM    274  C5   DG A   9     -24.553 -10.993  25.780  5.00  0.00           C  
ATOM    275  C6   DG A   9     -24.899 -10.266  24.620  1.00  0.00           C  
ATOM    276  O6   DG A   9     -24.485  -9.164  24.250  9.00  0.00           O  
ATOM    277  N7   DG A   9     -23.580 -10.792  26.690  1.00  0.00           N  
ATOM    278  C8   DG A   9     -23.732 -11.830  27.510  0.00  0.00           C  
ATOM    279  N9   DG A   9     -24.826 -12.583  27.240  3.00  0.00           N  
ATOM    280  OP1  DG A   9     -22.498 -15.334  33.460  5.00  0.00           O  
ATOM    281  OP2  DG A   9     -20.958 -14.052  31.950  1.00  0.00           O1-
ATOM    282  H1   DG A   9     -26.080 -10.333  23.070  0.00  0.00           H  
ATOM    283  H8   DG A   9     -23.070 -12.118  28.340  8.00  0.00           H  
ATOM    284  H1'  DG A   9     -26.148 -14.052  27.370  4.00  0.00           H  
ATOM    285  H2'  DG A   9     -23.215 -14.600  28.080  9.00  0.00           H  
ATOM    286  H21  DG A   9     -27.771 -11.805  22.860  9.00  0.00           H  
ATOM    287  H3'  DG A   9     -23.969 -16.399  29.590  8.00  0.00           H  
ATOM    288  H22  DG A   9     -27.677 -13.385  23.750  2.00  0.00           H  
ATOM    289  H4'  DG A   9     -26.501 -15.168  30.100  8.00  0.00           H  
ATOM    290  H5'  DG A   9     -25.177 -13.700  31.770  2.00  0.00           H  
ATOM    291 H2''  DG A   9     -24.306 -15.321  26.930  5.00  0.00           H  
ATOM    292 H5''  DG A   9     -24.932 -15.513  31.910  0.00  0.00           H  
ATOM    293  P    DT A  10     -25.512 -17.847  27.470  3.00  0.00           P  
ATOM    294  C5'  DT A  10     -27.297 -16.802  25.770  1.00  0.00           C  
ATOM    295  O5'  DT A  10     -25.953 -17.142  26.140  4.00  0.00           O  
ATOM    296  C4'  DT A  10     -27.351 -16.721  24.280  2.00  0.00           C  
ATOM    297  O4'  DT A  10     -26.735 -15.528  23.800  6.00  0.00           O  
ATOM    298  C3'  DT A  10     -26.781 -17.939  23.520  2.00  0.00           C  
ATOM    299  O3'  DT A  10     -27.776 -18.173  22.520  6.00  0.00           O  
ATOM    300  C2'  DT A  10     -25.441 -17.385  23.030  8.00  0.00           C  
ATOM    301  C1'  DT A  10     -25.824 -15.900  22.760  5.00  0.00           C  
ATOM    302  N1   DT A  10     -24.676 -14.956  22.600  0.00  0.00           N  
ATOM    303  C2   DT A  10     -24.823 -13.931  21.610  5.00  0.00           C  
ATOM    304  O2   DT A  10     -25.740 -13.969  20.730  9.00  0.00           O  
ATOM    305  N3   DT A  10     -23.895 -12.944  21.690  3.00  0.00           N  
ATOM    306  C4   DT A  10     -22.956 -12.756  22.680  0.00  0.00           C  
ATOM    307  O4   DT A  10     -22.438 -11.667  22.690  4.00  0.00           O  
ATOM    308  C5   DT A  10     -22.921 -13.812  23.730  3.00  0.00           C  
ATOM    309  C6   DT A  10     -23.705 -14.944  23.560  9.00  0.00           C  
ATOM    310  C7   DT A  10     -22.009 -13.738  24.880  6.00  0.00           C  
ATOM    311  OP1  DT A  10     -26.456 -18.979  27.650  9.00  0.00           O  
ATOM    312  OP2  DT A  10     -24.076 -18.111  27.410  3.00  0.00           O1-
ATOM    313  H3   DT A  10     -23.948 -12.291  20.990  9.00  0.00           H  
ATOM    314  H6   DT A  10     -23.867 -15.596  24.390  2.00  0.00           H  
ATOM    315  H1'  DT A  10     -26.388 -15.994  21.780  5.00  0.00           H  
ATOM    316  H2'  DT A  10     -24.679 -17.493  23.830  9.00  0.00           H  
ATOM    317  H3'  DT A  10     -26.660 -18.836  24.150  6.00  0.00           H  
ATOM    318  H4'  DT A  10     -28.390 -16.711  24.080  0.00  0.00           H  
ATOM    319  H5'  DT A  10     -27.702 -15.936  26.280  1.00  0.00           H  
ATOM    320  H71  DT A  10     -21.026 -13.508  24.510  3.00  0.00           H  
ATOM    321  H72  DT A  10     -22.340 -12.934  25.570  3.00  0.00           H  
ATOM    322  H73  DT A  10     -21.854 -14.785  25.380  8.00  0.00           H  
ATOM    323 H2''  DT A  10     -25.119 -17.800  22.070  7.00  0.00           H  
ATOM    324 H5''  DT A  10     -28.018 -17.558  26.130  1.00  0.00           H  
ATOM    325  P    DT A  11     -27.556 -19.145  21.290  3.00  0.00           P  
ATOM    326  C5'  DT A  11     -28.211 -17.283  19.540  7.00  0.00           C  
ATOM    327  O5'  DT A  11     -27.233 -18.144  20.130  0.00  0.00           O  
ATOM    328  C4'  DT A  11     -27.892 -16.420  18.350  2.00  0.00           C  
ATOM    329  O4'  DT A  11     -26.781 -15.610  18.620  3.00  0.00           O  
ATOM    330  C3'  DT A  11     -27.472 -17.320  17.120  5.00  0.00           C  
ATOM    331  O3'  DT A  11     -28.109 -16.979  15.900  9.00  0.00           O  
ATOM    332  C2'  DT A  11     -25.995 -16.979  17.020  1.00  0.00           C  
ATOM    333  C1'  DT A  11     -25.981 -15.496  17.510  6.00  0.00           C  
ATOM    334  N1   DT A  11     -24.606 -14.949  17.740  9.00  0.00           N  
ATOM    335  C2   DT A  11     -24.201 -13.644  17.270  7.00  0.00           C  
ATOM    336  O2   DT A  11     -24.882 -13.020  16.380  5.00  0.00           O  
ATOM    337  N3   DT A  11     -22.988 -13.144  17.740  6.00  0.00           N  
ATOM    338  C4   DT A  11     -22.215 -13.856  18.760  5.00  0.00           C  
ATOM    339  O4   DT A  11     -21.344 -13.109  19.230  9.00  0.00           O  
ATOM    340  C5   DT A  11     -22.638 -15.174  19.090  6.00  0.00           C  
ATOM    341  C6   DT A  11     -23.827 -15.686  18.700  5.00  0.00           C  
ATOM    342  C7   DT A  11     -21.830 -15.986  20.150  0.00  0.00           C  
ATOM    343  OP1  DT A  11     -28.800 -19.865  21.010  3.00  0.00           O  
ATOM    344  OP2  DT A  11     -26.282 -19.912  21.580  5.00  0.00           O1-
ATOM    345  H3   DT A  11     -22.801 -12.100  17.580  8.00  0.00           H  
ATOM    346  H6   DT A  11     -24.181 -16.685  18.970  2.00  0.00           H  
ATOM    347  H1'  DT A  11     -26.552 -14.836  16.880  3.00  0.00           H  
ATOM    348  H2'  DT A  11     -25.465 -17.691  17.640  5.00  0.00           H  
ATOM    349  H3'  DT A  11     -27.596 -18.422  17.310  8.00  0.00           H  
ATOM    350  H4'  DT A  11     -28.764 -15.767  18.150  7.00  0.00           H  
ATOM    351  H5'  DT A  11     -28.591 -16.675  20.330  9.00  0.00           H  
ATOM    352  H71  DT A  11     -21.058 -16.596  19.640  7.00  0.00           H  
ATOM    353  H72  DT A  11     -21.219 -15.328  20.810  4.00  0.00           H  
ATOM    354  H73  DT A  11     -22.479 -16.707  20.710  5.00  0.00           H  
ATOM    355 H2''  DT A  11     -25.625 -16.964  16.050  8.00  0.00           H  
ATOM    356 H5''  DT A  11     -29.108 -17.952  19.310  6.00  0.00           H  
ATOM    357  P    DA A  12     -29.515 -17.504  15.460  3.00  0.00           P  
ATOM    358  C5'  DA A  12     -30.193 -15.510  13.730  6.00  0.00           C  
ATOM    359  O5'  DA A  12     -30.482 -16.318  14.900  0.00  0.00           O  
ATOM    360  C4'  DA A  12     -31.414 -14.682  13.370  9.00  0.00           C  
ATOM    361  O4'  DA A  12     -31.069 -13.622  12.420  2.00  0.00           O  
ATOM    362  C3'  DA A  12     -32.595 -15.461  12.760  5.00  0.00           C  
ATOM    363  O3'  DA A  12     -33.731 -14.927  13.330  9.00  0.00           O  
ATOM    364  C2'  DA A  12     -32.530 -15.068  11.320  7.00  0.00           C  
ATOM    365  C1'  DA A  12     -31.990 -13.613  11.340  2.00  0.00           C  
ATOM    366  N1   DA A  12     -31.603  -9.630   8.220  3.00  0.00           N  
ATOM    367  C2   DA A  12     -32.501  -9.942   9.140  8.00  0.00           C  
ATOM    368  N3   DA A  12     -32.601 -11.116   9.850  7.00  0.00           N  
ATOM    369  C4   DA A  12     -31.555 -11.981   9.530  3.00  0.00           C  
ATOM    370  C5   DA A  12     -30.562 -11.738   8.590  5.00  0.00           C  
ATOM    371  C6   DA A  12     -30.668 -10.506   7.950  4.00  0.00           C  
ATOM    372  N6   DA A  12     -29.732 -10.137   7.070  0.00  0.00           N  
ATOM    373  N7   DA A  12     -29.675 -12.793   8.590  8.00  0.00           N  
ATOM    374  C8   DA A  12     -30.254 -13.649   9.440  2.00  0.00           C  
ATOM    375  N9   DA A  12     -31.250 -13.130  10.160  7.00  0.00           N  
ATOM    376  OP1  DA A  12     -30.248 -18.047  16.600  6.00  0.00           O  
ATOM    377  OP2  DA A  12     -29.267 -18.414  14.270  8.00  0.00           O1-
ATOM    378  H2   DA A  12     -33.203  -9.152   9.320  8.00  0.00           H  
ATOM    379  H8   DA A  12     -29.902 -14.696   9.690  0.00  0.00           H  
ATOM    380  H1'  DA A  12     -32.856 -12.981  11.590  5.00  0.00           H  
ATOM    381  H2'  DA A  12     -31.802 -15.638  10.840  2.00  0.00           H  
ATOM    382  H3'  DA A  12     -32.418 -16.538  12.850  9.00  0.00           H  
ATOM    383  H4'  DA A  12     -31.819 -14.290  14.310  2.00  0.00           H  
ATOM    384  H5'  DA A  12     -29.962 -16.156  12.860  6.00  0.00           H  
ATOM    385  H61  DA A  12     -29.917  -9.247   6.620  1.00  0.00           H  
ATOM    386  H62  DA A  12     -28.866 -10.653   7.000  5.00  0.00           H  
ATOM    387 H2''  DA A  12     -33.528 -15.121  10.870  7.00  0.00           H  
ATOM    388 H5''  DA A  12     -29.455 -14.804  13.990  4.00  0.00           H  
ATOM    389  P    DG A  13     -35.228 -15.610  13.240  2.00  0.00           P  
ATOM    390  C5'  DG A  13     -36.251 -13.562  11.660  4.00  0.00           C  
ATOM    391  O5'  DG A  13     -35.842 -14.968  11.860  0.00  0.00           O  
ATOM    392  C4'  DG A  13     -36.365 -13.226  10.140  3.00  0.00           C  
ATOM    393  O4'  DG A  13     -35.132 -13.214   9.540  7.00  0.00           O  
ATOM    394  C3'  DG A  13     -37.329 -14.276   9.480  0.00  0.00           C  
ATOM    395  O3'  DG A  13     -38.268 -13.668   8.550  1.00  0.00           O  
ATOM    396  C2'  DG A  13     -36.280 -15.087   8.630  4.00  0.00           C  
ATOM    397  C1'  DG A  13     -35.319 -13.966   8.330  0.00  0.00           C  
ATOM    398  N1   DG A  13     -31.466 -12.690   5.300  9.00  0.00           N  
ATOM    399  C2   DG A  13     -32.548 -11.922   5.760  3.00  0.00           C  
ATOM    400  N2   DG A  13     -32.642 -10.721   5.310  5.00  0.00           N  
ATOM    401  N3   DG A  13     -33.525 -12.447   6.500  1.00  0.00           N  
ATOM    402  C4   DG A  13     -33.283 -13.752   6.880  1.00  0.00           C  
ATOM    403  C5   DG A  13     -32.228 -14.507   6.490  2.00  0.00           C  
ATOM    404  C6   DG A  13     -31.172 -14.029   5.690  4.00  0.00           C  
ATOM    405  O6   DG A  13     -30.124 -14.521   5.340  3.00  0.00           O  
ATOM    406  N7   DG A  13     -32.297 -15.736   7.210  5.00  0.00           N  
ATOM    407  C8   DG A  13     -33.396 -15.632   7.940  8.00  0.00           C  
ATOM    408  N9   DG A  13     -34.091 -14.474   7.730  5.00  0.00           N  
ATOM    409  OP1  DG A  13     -35.917 -15.144  14.440  8.00  0.00           O  
ATOM    410  OP2  DG A  13     -35.043 -17.065  13.130  6.00  0.00           O1-
ATOM    411  H1   DG A  13     -30.698 -12.214   4.870  9.00  0.00           H  
ATOM    412  H8   DG A  13     -33.758 -16.402   8.610  3.00  0.00           H  
ATOM    413  H1'  DG A  13     -35.776 -13.331   7.630  2.00  0.00           H  
ATOM    414  H2'  DG A  13     -35.771 -15.790   9.240  5.00  0.00           H  
ATOM    415  H21  DG A  13     -31.874 -10.299   4.880  6.00  0.00           H  
ATOM    416  H3'  DG A  13     -37.887 -14.868  10.230  8.00  0.00           H  
ATOM    417  H22  DG A  13     -33.585 -10.182   5.540  0.00  0.00           H  
ATOM    418  H4'  DG A  13     -36.818 -12.222  10.120  9.00  0.00           H  
ATOM    419  H5'  DG A  13     -35.552 -12.846  12.080  4.00  0.00           H  
ATOM    420 H2''  DG A  13     -36.649 -15.447   7.740  7.00  0.00           H  
ATOM    421 H5''  DG A  13     -37.275 -13.423  12.050  3.00  0.00           H  
ATOM    422  P    DG A  14     -39.540 -14.418   7.900  3.00  0.00           P  
ATOM    423  C5'  DG A  14     -39.789 -14.563   5.250  2.00  0.00           C  
ATOM    424  O5'  DG A  14     -39.157 -14.996   6.410  8.00  0.00           O  
ATOM    425  C4'  DG A  14     -39.054 -13.508   4.430  4.00  0.00           C  
ATOM    426  O4'  DG A  14     -37.838 -14.108   3.900  2.00  0.00           O  
ATOM    427  C3'  DG A  14     -38.722 -12.128   5.090  0.00  0.00           C  
ATOM    428  O3'  DG A  14     -39.085 -10.850   4.570  0.00  0.00           O  
ATOM    429  C2'  DG A  14     -37.164 -12.230   5.080  9.00  0.00           C  
ATOM    430  C1'  DG A  14     -36.812 -13.700   4.710  7.00  0.00           C  
ATOM    431  N1   DG A  14     -32.964 -16.857   3.740  3.00  0.00           N  
ATOM    432  C2   DG A  14     -33.892 -16.945   4.710  1.00  0.00           C  
ATOM    433  N2   DG A  14     -33.864 -18.042   5.470  8.00  0.00           N  
ATOM    434  N3   DG A  14     -34.716 -15.985   4.940  1.00  0.00           N  
ATOM    435  C4   DG A  14     -34.686 -14.935   4.040  8.00  0.00           C  
ATOM    436  C5   DG A  14     -33.731 -14.696   3.130  1.00  0.00           C  
ATOM    437  C6   DG A  14     -32.790 -15.784   2.970  3.00  0.00           C  
ATOM    438  O6   DG A  14     -31.863 -15.788   2.180  2.00  0.00           O  
ATOM    439  N7   DG A  14     -33.926 -13.550   2.290  9.00  0.00           N  
ATOM    440  C8   DG A  14     -35.093 -13.158   2.800  9.00  0.00           C  
ATOM    441  N9   DG A  14     -35.627 -13.916   3.860  3.00  0.00           N  
ATOM    442  OP1  DG A  14     -40.538 -13.393   7.750  9.00  0.00           O  
ATOM    443  OP2  DG A  14     -39.925 -15.569   8.710  2.00  0.00           O1-
ATOM    444  H1   DG A  14     -32.376 -17.641   3.600  5.00  0.00           H  
ATOM    445  H8   DG A  14     -35.626 -12.264   2.490  3.00  0.00           H  
ATOM    446  H1'  DG A  14     -36.667 -14.242   5.590  5.00  0.00           H  
ATOM    447  H2'  DG A  14     -36.705 -11.589   4.300  0.00  0.00           H  
ATOM    448  H21  DG A  14     -33.089 -18.693   5.420  8.00  0.00           H  
ATOM    449  H3'  DG A  14     -39.213 -12.282   6.000  3.00  0.00           H  
ATOM    450  H22  DG A  14     -34.660 -18.207   6.070  5.00  0.00           H  
ATOM    451  H4'  DG A  14     -39.674 -13.287   3.550  1.00  0.00           H  
ATOM    452  H5'  DG A  14     -40.760 -14.268   5.500  2.00  0.00           H  
ATOM    453 H2''  DG A  14     -36.896 -12.098   6.150  3.00  0.00           H  
ATOM    454 H5''  DG A  14     -39.972 -15.367   4.490  4.00  0.00           H  
ATOM    455  P    DG A  15     -40.256 -10.689   3.470  7.00  0.00           P  
ATOM    456  C5'  DG A  15     -38.602 -10.797   1.500  7.00  0.00           C  
ATOM    457  O5'  DG A  15     -39.722 -11.344   2.140  1.00  0.00           O  
ATOM    458  C4'  DG A  15     -38.084 -11.631   0.300  9.00  0.00           C  
ATOM    459  O4'  DG A  15     -37.457 -12.659   0.880  6.00  0.00           O  
ATOM    460  C3'  DG A  15     -39.244 -12.137  -0.600  4.00  0.00           C  
ATOM    461  O3'  DG A  15     -39.029 -11.885  -1.940  5.00  0.00           O  
ATOM    462  C2'  DG A  15     -39.164 -13.642  -0.330  9.00  0.00           C  
ATOM    463  C1'  DG A  15     -37.728 -13.771   0.040  2.00  0.00           C  
ATOM    464  N1   DG A  15     -33.960 -17.097   0.040  6.00  0.00           N  
ATOM    465  C2   DG A  15     -34.258 -16.018  -0.710  8.00  0.00           C  
ATOM    466  N2   DG A  15     -33.339 -15.718  -1.630  9.00  0.00           N  
ATOM    467  N3   DG A  15     -35.275 -15.183  -0.660  5.00  0.00           N  
ATOM    468  C4   DG A  15     -36.164 -15.648   0.260  4.00  0.00           C  
ATOM    469  C5   DG A  15     -35.964 -16.765   1.120  7.00  0.00           C  
ATOM    470  C6   DG A  15     -34.806 -17.566   0.980  2.00  0.00           C  
ATOM    471  O6   DG A  15     -34.516 -18.655   1.590  7.00  0.00           O  
ATOM    472  N7   DG A  15     -37.077 -16.874   1.940  5.00  0.00           N  
ATOM    473  C8   DG A  15     -37.845 -15.885   1.530  9.00  0.00           C  
ATOM    474  N9   DG A  15     -37.313 -15.062   0.590  1.00  0.00           N  
ATOM    475  OP1  DG A  15     -40.577  -9.255   3.270  8.00  0.00           O  
ATOM    476  OP2  DG A  15     -41.421 -11.512   3.980  3.00  0.00           O1-
ATOM    477  H1   DG A  15     -32.997 -17.399   0.050  1.00  0.00           H  
ATOM    478  H8   DG A  15     -38.731 -15.688   2.040  7.00  0.00           H  
ATOM    479  H1'  DG A  15     -37.289 -13.681  -0.930  5.00  0.00           H  
ATOM    480  H2'  DG A  15     -39.836 -13.976   0.460  0.00  0.00           H  
ATOM    481  H21  DG A  15     -32.512 -16.362  -1.810  4.00  0.00           H  
ATOM    482  H3'  DG A  15     -40.273 -11.759  -0.330  3.00  0.00           H  
ATOM    483  H22  DG A  15     -33.505 -14.906  -2.140  0.00  0.00           H  
ATOM    484  H4'  DG A  15     -37.280 -11.108  -0.260  8.00  0.00           H  
ATOM    485  H5'  DG A  15     -37.720 -10.782   2.180  9.00  0.00           H  
ATOM    486 H2''  DG A  15     -39.482 -14.162  -1.270  1.00  0.00           H  
ATOM    487 H5''  DG A  15     -38.733  -9.807   1.130  5.00  0.00           H  
ATOM    488  P    DT A  16     -39.498 -10.486  -2.510  5.00  0.00           P  
ATOM    489  C5'  DT A  16     -39.611 -11.567  -4.860  3.00  0.00           C  
ATOM    490  O5'  DT A  16     -39.187 -10.531  -4.000  2.00  0.00           O  
ATOM    491  C4'  DT A  16     -39.324 -11.332  -6.390  9.00  0.00           C  
ATOM    492  O4'  DT A  16     -40.174 -10.179  -6.640  3.00  0.00           O  
ATOM    493  C3'  DT A  16     -37.928 -10.861  -6.790  8.00  0.00           C  
ATOM    494  O3'  DT A  16     -37.624 -11.310  -8.030  4.00  0.00           O  
ATOM    495  C2'  DT A  16     -37.967  -9.333  -6.730  8.00  0.00           C  
ATOM    496  C1'  DT A  16     -39.432  -9.062  -7.060  7.00  0.00           C  
ATOM    497  N1   DT A  16     -39.926  -7.724  -6.640  0.00  0.00           N  
ATOM    498  C2   DT A  16     -40.642  -6.921  -7.570  2.00  0.00           C  
ATOM    499  O2   DT A  16     -40.843  -7.220  -8.640  8.00  0.00           O  
ATOM    500  N3   DT A  16     -41.180  -5.759  -7.120  1.00  0.00           N  
ATOM    501  C4   DT A  16     -41.213  -5.388  -5.760  1.00  0.00           C  
ATOM    502  O4   DT A  16     -42.016  -4.480  -5.420  0.00  0.00           O  
ATOM    503  C5   DT A  16     -40.288  -6.067  -4.960  2.00  0.00           C  
ATOM    504  C6   DT A  16     -39.759  -7.273  -5.330  2.00  0.00           C  
ATOM    505  C7   DT A  16     -40.104  -5.670  -3.500  3.00  0.00           C  
ATOM    506  OP1  DT A  16     -38.723  -9.345  -1.970  6.00  0.00           O  
ATOM    507  OP2  DT A  16     -40.923 -10.474  -2.340  8.00  0.00           O1-
ATOM    508  H3   DT A  16     -41.886  -5.328  -7.650  6.00  0.00           H  
ATOM    509  H6   DT A  16     -39.173  -7.832  -4.620  2.00  0.00           H  
ATOM    510  H1'  DT A  16     -39.527  -9.207  -8.120  5.00  0.00           H  
ATOM    511  H2'  DT A  16     -37.829  -9.034  -5.670  4.00  0.00           H  
ATOM    512  H3'  DT A  16     -37.180 -11.124  -5.980  8.00  0.00           H  
ATOM    513  H4'  DT A  16     -39.596 -12.254  -7.050  8.00  0.00           H  
ATOM    514  H5'  DT A  16     -40.709 -11.704  -4.730  9.00  0.00           H  
ATOM    515  H71  DT A  16     -40.040  -4.582  -3.380  5.00  0.00           H  
ATOM    516  H72  DT A  16     -40.919  -6.046  -2.790  7.00  0.00           H  
ATOM    517  H73  DT A  16     -39.201  -6.009  -3.050  9.00  0.00           H  
ATOM    518 H2''  DT A  16     -37.176  -8.838  -7.390  7.00  0.00           H  
ATOM    519 H5''  DT A  16     -39.209 -12.533  -4.580  4.00  0.00           H  
ATOM    520  P    DT A  17     -36.603 -12.508  -8.230  8.00  0.00           P  
ATOM    521  C5'  DT A  17     -36.910 -14.047  -6.150  9.00  0.00           C  
ATOM    522  O5'  DT A  17     -37.217 -13.826  -7.540  2.00  0.00           O  
ATOM    523  C4'  DT A  17     -35.613 -14.823  -6.050  7.00  0.00           C  
ATOM    524  O4'  DT A  17     -35.477 -15.357  -4.770  0.00  0.00           O  
ATOM    525  C3'  DT A  17     -35.535 -16.026  -7.000  1.00  0.00           C  
ATOM    526  O3'  DT A  17     -34.245 -16.101  -7.540  4.00  0.00           O  
ATOM    527  C2'  DT A  17     -35.776 -17.248  -6.100  0.00  0.00           C  
ATOM    528  C1'  DT A  17     -35.043 -16.636  -4.900  4.00  0.00           C  
ATOM    529  N1   DT A  17     -35.485 -17.533  -3.780  0.00  0.00           N  
ATOM    530  C2   DT A  17     -34.610 -18.532  -3.400  0.00  0.00           C  
ATOM    531  O2   DT A  17     -33.536 -18.699  -4.000  1.00  0.00           O  
ATOM    532  N3   DT A  17     -34.950 -19.313  -2.340  3.00  0.00           N  
ATOM    533  C4   DT A  17     -36.138 -19.250  -1.660  2.00  0.00           C  
ATOM    534  O4   DT A  17     -36.296 -19.975  -0.620  8.00  0.00           O  
ATOM    535  C5   DT A  17     -37.036 -18.146  -2.090  2.00  0.00           C  
ATOM    536  C6   DT A  17     -36.705 -17.404  -3.190  7.00  0.00           C  
ATOM    537  C7   DT A  17     -38.286 -17.744  -1.290  8.00  0.00           C  
ATOM    538  OP1  DT A  17     -35.300 -12.248  -7.570  9.00  0.00           O  
ATOM    539  OP2  DT A  17     -36.569 -12.683  -9.710  6.00  0.00           O1-
ATOM    540  H3   DT A  17     -34.231 -19.937  -1.940  5.00  0.00           H  
ATOM    541  H6   DT A  17     -37.459 -16.711  -3.540  0.00  0.00           H  
ATOM    542  H1'  DT A  17     -33.887 -16.625  -5.030  7.00  0.00           H  
ATOM    543  H2'  DT A  17     -36.815 -17.364  -5.970  9.00  0.00           H  
ATOM    544  H3'  DT A  17     -36.248 -15.912  -7.860  6.00  0.00           H  
ATOM    545  H4'  DT A  17     -34.761 -14.138  -6.230  8.00  0.00           H  
ATOM    546  H5'  DT A  17     -37.619 -14.630  -5.680  0.00  0.00           H  
ATOM    547  H71  DT A  17     -38.498 -16.760  -1.360  7.00  0.00           H  
ATOM    548  H72  DT A  17     -38.144 -18.005  -0.220  8.00  0.00           H  
ATOM    549  H73  DT A  17     -39.100 -18.268  -1.730  8.00  0.00           H  
ATOM    550 H2''  DT A  17     -35.183 -18.106  -6.520  5.00  0.00           H  
ATOM    551 H5''  DT A  17     -36.771 -13.118  -5.600  9.00  0.00           H  
ATOM    552  P    DA A  18     -33.806 -16.674  -9.020  2.00  0.00           P  
ATOM    553  C5'  DA A  18     -31.282 -16.758  -8.190  3.00  0.00           C  
ATOM    554  O5'  DA A  18     -32.381 -17.537  -8.660  5.00  0.00           O  
ATOM    555  C4'  DA A  18     -30.049 -17.506  -7.810  3.00  0.00           C  
ATOM    556  O4'  DA A  18     -30.191 -18.384  -6.720  9.00  0.00           O  
ATOM    557  C3'  DA A  18     -29.388 -18.427  -8.900  4.00  0.00           C  
ATOM    558  O3'  DA A  18     -27.984 -18.170  -9.280  7.00  0.00           O  
ATOM    559  C2'  DA A  18     -29.288 -19.818  -8.250  7.00  0.00           C  
ATOM    560  C1'  DA A  18     -29.127 -19.329  -6.810  0.00  0.00           C  
ATOM    561  N1   DA A  18     -26.748 -22.497  -3.640  4.00  0.00           N  
ATOM    562  C2   DA A  18     -26.330 -21.671  -4.530  8.00  0.00           C  
ATOM    563  N3   DA A  18     -26.970 -20.901  -5.330  9.00  0.00           N  
ATOM    564  C4   DA A  18     -28.332 -20.973  -5.080  8.00  0.00           C  
ATOM    565  C5   DA A  18     -28.926 -21.832  -4.200  6.00  0.00           C  
ATOM    566  C6   DA A  18     -28.034 -22.572  -3.470  2.00  0.00           C  
ATOM    567  N6   DA A  18     -28.259 -23.222  -2.380  6.00  0.00           N  
ATOM    568  N7   DA A  18     -30.305 -21.730  -4.250  3.00  0.00           N  
ATOM    569  C8   DA A  18     -30.490 -20.805  -5.200  0.00  0.00           C  
ATOM    570  N9   DA A  18     -29.379 -20.372  -5.760  7.00  0.00           N  
ATOM    571  OP1  DA A  18     -33.425 -15.475  -9.840  4.00  0.00           O  
ATOM    572  OP2  DA A  18     -34.769 -17.685  -9.480  6.00  0.00           O1-
ATOM    573  H2   DA A  18     -25.254 -21.533  -4.750  8.00  0.00           H  
ATOM    574  H8   DA A  18     -31.467 -20.557  -5.460  1.00  0.00           H  
ATOM    575  H1'  DA A  18     -28.109 -18.898  -6.710  6.00  0.00           H  
ATOM    576  H2'  DA A  18     -30.208 -20.344  -8.400  2.00  0.00           H  
ATOM    577  H3'  DA A  18     -30.043 -18.537  -9.800  4.00  0.00           H  
ATOM    578  H4'  DA A  18     -29.397 -16.762  -7.530  8.00  0.00           H  
ATOM    579  H5'  DA A  18     -31.558 -16.175  -7.310  5.00  0.00           H  
ATOM    580  H61  DA A  18     -27.422 -23.633  -1.950  8.00  0.00           H  
ATOM    581  H62  DA A  18     -29.201 -23.179  -1.930  5.00  0.00           H  
ATOM    582 H2''  DA A  18     -28.499 -20.522  -8.530  8.00  0.00           H  
ATOM    583 H5''  DA A  18     -31.117 -16.160  -8.950  4.00  0.00           H  
ATOM    584  P    DG A  19     -27.688 -17.143 -10.490  0.00  0.00           P  
ATOM    585  C5'  DG A  19     -27.634 -14.929  -8.910  3.00  0.00           C  
ATOM    586  O5'  DG A  19     -28.295 -15.733  -9.890  9.00  0.00           O  
ATOM    587  C4'  DG A  19     -28.393 -13.617  -8.710  7.00  0.00           C  
ATOM    588  O4'  DG A  19     -29.574 -13.875  -7.940  6.00  0.00           O  
ATOM    589  C3'  DG A  19     -27.536 -12.603  -7.940  3.00  0.00           C  
ATOM    590  O3'  DG A  19     -27.988 -11.242  -8.190  9.00  0.00           O  
ATOM    591  C2'  DG A  19     -27.801 -13.123  -6.530  1.00  0.00           C  
ATOM    592  C1'  DG A  19     -29.335 -13.323  -6.660  6.00  0.00           C  
ATOM    593  N1   DG A  19     -29.254 -17.430  -3.470  8.00  0.00           N  
ATOM    594  C2   DG A  19     -28.298 -17.055  -4.400  9.00  0.00           C  
ATOM    595  N2   DG A  19     -27.375 -17.935  -4.600  8.00  0.00           N  
ATOM    596  N3   DG A  19     -28.476 -16.083  -5.270  3.00  0.00           N  
ATOM    597  C4   DG A  19     -29.605 -15.319  -5.050  8.00  0.00           C  
ATOM    598  C5   DG A  19     -30.616 -15.651  -4.130  2.00  0.00           C  
ATOM    599  C6   DG A  19     -30.486 -16.810  -3.250  9.00  0.00           C  
ATOM    600  O6   DG A  19     -31.104 -17.308  -2.300  1.00  0.00           O  
ATOM    601  N7   DG A  19     -31.513 -14.561  -4.050  5.00  0.00           N  
ATOM    602  C8   DG A  19     -31.139 -13.833  -5.030  0.00  0.00           C  
ATOM    603  N9   DG A  19     -29.961 -14.113  -5.620  9.00  0.00           N  
ATOM    604  OP1  DG A  19     -28.329 -17.583 -11.720  4.00  0.00           O  
ATOM    605  OP2  DG A  19     -26.254 -16.933 -10.590  0.00  0.00           O1-
ATOM    606  H1   DG A  19     -29.075 -18.282  -2.900  6.00  0.00           H  
ATOM    607  H8   DG A  19     -31.774 -13.041  -5.280  2.00  0.00           H  
ATOM    608  H1'  DG A  19     -29.789 -12.340  -6.540  8.00  0.00           H  
ATOM    609  H2'  DG A  19     -27.254 -14.069  -6.290  8.00  0.00           H  
ATOM    610  H21  DG A  19     -27.266 -18.725  -3.920  3.00  0.00           H  
ATOM    611  H3'  DG A  19     -26.498 -12.561  -8.270  1.00  0.00           H  
ATOM    612  H22  DG A  19     -26.659 -17.760  -5.280  8.00  0.00           H  
ATOM    613  H4'  DG A  19     -28.672 -13.217  -9.670  9.00  0.00           H  
ATOM    614  H5'  DG A  19     -26.671 -14.595  -9.160  4.00  0.00           H  
ATOM    615 H2''  DG A  19     -27.452 -12.303  -5.830  2.00  0.00           H  
ATOM    616 H5''  DG A  19     -27.560 -15.506  -8.010  2.00  0.00           H  
ATOM    617  P    DG A  20     -27.175  -9.922  -7.830  3.00  0.00           P  
ATOM    618  C5'  DG A  20     -28.608  -9.080  -5.710  0.00  0.00           C  
ATOM    619  O5'  DG A  20     -27.511  -9.778  -6.270  0.00  0.00           O  
ATOM    620  C4'  DG A  20     -28.653  -9.040  -4.190  2.00  0.00           C  
ATOM    621  O4'  DG A  20     -29.151 -10.317  -3.660  9.00  0.00           O  
ATOM    622  C3'  DG A  20     -27.314  -8.746  -3.470  6.00  0.00           C  
ATOM    623  O3'  DG A  20     -27.574  -8.068  -2.200  9.00  0.00           O  
ATOM    624  C2'  DG A  20     -26.869 -10.126  -3.070  0.00  0.00           C  
ATOM    625  C1'  DG A  20     -28.208 -10.743  -2.720  8.00  0.00           C  
ATOM    626  N1   DG A  20     -30.396 -14.256   0.250  4.00  0.00           N  
ATOM    627  C2   DG A  20     -30.590 -12.931   0.230  3.00  0.00           C  
ATOM    628  N2   DG A  20     -31.516 -12.457   0.990  1.00  0.00           N  
ATOM    629  N3   DG A  20     -29.943 -12.097  -0.570  7.00  0.00           N  
ATOM    630  C4   DG A  20     -29.122 -12.751  -1.460  4.00  0.00           C  
ATOM    631  C5   DG A  20     -28.877 -14.128  -1.530  6.00  0.00           C  
ATOM    632  C6   DG A  20     -29.443 -14.964  -0.480  7.00  0.00           C  
ATOM    633  O6   DG A  20     -29.180 -16.162  -0.140  9.00  0.00           O  
ATOM    634  N7   DG A  20     -27.884 -14.375  -2.500  9.00  0.00           N  
ATOM    635  C8   DG A  20     -27.528 -13.201  -2.910  5.00  0.00           C  
ATOM    636  N9   DG A  20     -28.334 -12.194  -2.460  0.00  0.00           N  
ATOM    637  OP1  DG A  20     -27.772  -8.761  -8.530  0.00  0.00           O  
ATOM    638  OP2  DG A  20     -25.730 -10.095  -7.920  5.00  0.00           O1-
ATOM    639  H1   DG A  20     -30.893 -14.751   0.950  6.00  0.00           H  
ATOM    640  H8   DG A  20     -26.762 -13.074  -3.680  2.00  0.00           H  
ATOM    641  H1'  DG A  20     -28.566 -10.274  -1.770  7.00  0.00           H  
ATOM    642  H2'  DG A  20     -26.478 -10.507  -4.020  8.00  0.00           H  
ATOM    643  H21  DG A  20     -31.820 -13.013   1.810  5.00  0.00           H  
ATOM    644  H3'  DG A  20     -26.534  -8.229  -4.130  0.00  0.00           H  
ATOM    645  H22  DG A  20     -31.835 -11.504   0.820  5.00  0.00           H  
ATOM    646  H4'  DG A  20     -29.429  -8.275  -3.990  2.00  0.00           H  
ATOM    647  H5'  DG A  20     -29.502  -9.577  -6.040  8.00  0.00           H  
ATOM    648 H2''  DG A  20     -25.983 -10.091  -2.320  3.00  0.00           H  
ATOM    649 H5''  DG A  20     -28.456  -8.064  -6.070  4.00  0.00           H  
ATOM    650  P    DG A  21     -26.399  -7.120  -1.650  8.00  0.00           P  
ATOM    651  C5'  DG A  21     -27.700  -5.033  -0.580  2.00  0.00           C  
ATOM    652  O5'  DG A  21     -26.904  -6.206  -0.420  6.00  0.00           O  
ATOM    653  C4'  DG A  21     -28.269  -4.419   0.730  9.00  0.00           C  
ATOM    654  O4'  DG A  21     -29.221  -5.276   1.410  1.00  0.00           O  
ATOM    655  C3'  DG A  21     -27.145  -4.027   1.700  1.00  0.00           C  
ATOM    656  O3'  DG A  21     -27.489  -2.854   2.410  9.00  0.00           O  
ATOM    657  C2'  DG A  21     -27.159  -5.292   2.610  4.00  0.00           C  
ATOM    658  C1'  DG A  21     -28.669  -5.556   2.660  2.00  0.00           C  
ATOM    659  N1   DG A  21     -28.279 -10.739   2.080  0.00  0.00           N  
ATOM    660  C2   DG A  21     -27.734  -9.769   1.320  9.00  0.00           C  
ATOM    661  N2   DG A  21     -26.933 -10.066   0.320  1.00  0.00           N  
ATOM    662  N3   DG A  21     -27.984  -8.478   1.500  9.00  0.00           N  
ATOM    663  C4   DG A  21     -28.662  -8.172   2.670  3.00  0.00           C  
ATOM    664  C5   DG A  21     -29.294  -9.096   3.480  8.00  0.00           C  
ATOM    665  C6   DG A  21     -29.045 -10.491   3.180  6.00  0.00           C  
ATOM    666  O6   DG A  21     -29.455 -11.499   3.890  6.00  0.00           O  
ATOM    667  N7   DG A  21     -30.030  -8.470   4.530  4.00  0.00           N  
ATOM    668  C8   DG A  21     -29.886  -7.195   4.210  2.00  0.00           C  
ATOM    669  N9   DG A  21     -29.110  -6.909   3.140  7.00  0.00           N  
ATOM    670  OP1  DG A  21     -25.953  -6.178  -2.750  5.00  0.00           O  
ATOM    671  OP2  DG A  21     -25.333  -7.981  -1.080  8.00  0.00           O1-
ATOM    672  H1   DG A  21     -28.027 -11.675   1.840  8.00  0.00           H  
ATOM    673  H8   DG A  21     -30.380  -6.361   4.880  2.00  0.00           H  
ATOM    674  H1'  DG A  21     -29.211  -4.834   3.280  2.00  0.00           H  
ATOM    675  H2'  DG A  21     -26.618  -6.108   2.130  7.00  0.00           H  
ATOM    676  H21  DG A  21     -26.555 -10.955   0.100  7.00  0.00           H  
ATOM    677  H3'  DG A  21     -26.225  -3.875   1.140  5.00  0.00           H  
ATOM    678  H22  DG A  21     -26.457  -9.207  -0.120  0.00  0.00           H  
ATOM    679  H4'  DG A  21     -28.758  -3.493   0.380  0.00  0.00           H  
ATOM    680  H5'  DG A  21     -28.507  -5.213  -1.270  9.00  0.00           H  
ATOM    681 H2''  DG A  21     -26.695  -5.027   3.590  4.00  0.00           H  
ATOM    682 H5''  DG A  21     -27.168  -4.271  -1.100  6.00  0.00           H  
ATOM    683  P    DT A  22     -26.398  -1.613   2.550  0.00  0.00           P  
ATOM    684  C5'  DT A  22     -24.920  -2.468   4.420  2.00  0.00           C  
ATOM    685  O5'  DT A  22     -25.044  -2.159   3.060  7.00  0.00           O  
ATOM    686  C4'  DT A  22     -23.646  -3.301   4.780  2.00  0.00           C  
ATOM    687  O4'  DT A  22     -23.598  -3.420   6.240  3.00  0.00           O  
ATOM    688  C3'  DT A  22     -23.597  -4.656   4.160  7.00  0.00           C  
ATOM    689  O3'  DT A  22     -22.307  -4.942   3.660  6.00  0.00           O  
ATOM    690  C2'  DT A  22     -23.895  -5.569   5.340  6.00  0.00           C  
ATOM    691  C1'  DT A  22     -23.077  -4.772   6.380  3.00  0.00           C  
ATOM    692  N1   DT A  22     -23.127  -5.345   7.740  1.00  0.00           N  
ATOM    693  C2   DT A  22     -21.967  -5.549   8.490  8.00  0.00           C  
ATOM    694  O2   DT A  22     -20.823  -5.133   8.170  5.00  0.00           O  
ATOM    695  N3   DT A  22     -22.142  -6.221   9.670  7.00  0.00           N  
ATOM    696  C4   DT A  22     -23.360  -6.594  10.220  7.00  0.00           C  
ATOM    697  O4   DT A  22     -23.384  -7.152  11.300  4.00  0.00           O  
ATOM    698  C5   DT A  22     -24.508  -6.407   9.400  4.00  0.00           C  
ATOM    699  C6   DT A  22     -24.381  -5.749   8.210  5.00  0.00           C  
ATOM    700  C7   DT A  22     -25.878  -6.900   9.850  8.00  0.00           C  
ATOM    701  OP1  DT A  22     -26.930  -0.585   3.450  2.00  0.00           O  
ATOM    702  OP2  DT A  22     -26.110  -1.240   1.140  4.00  0.00           O1-
ATOM    703  H3   DT A  22     -21.306  -6.419  10.230  6.00  0.00           H  
ATOM    704  H6   DT A  22     -25.335  -5.422   7.730  1.00  0.00           H  
ATOM    705  H1'  DT A  22     -22.042  -4.721   5.990  1.00  0.00           H  
ATOM    706  H2'  DT A  22     -24.937  -5.537   5.530  2.00  0.00           H  
ATOM    707  H3'  DT A  22     -24.443  -4.852   3.450  8.00  0.00           H  
ATOM    708  H4'  DT A  22     -22.728  -2.702   4.440  3.00  0.00           H  
ATOM    709  H5'  DT A  22     -25.715  -3.108   4.720  3.00  0.00           H  
ATOM    710  H71  DT A  22     -25.831  -7.839  10.360  5.00  0.00           H  
ATOM    711  H72  DT A  22     -26.355  -6.214  10.510  5.00  0.00           H  
ATOM    712  H73  DT A  22     -26.512  -6.981   8.930  0.00  0.00           H  
ATOM    713 H2''  DT A  22     -23.508  -6.569   5.230  9.00  0.00           H  
ATOM    714 H5''  DT A  22     -25.071  -1.479   5.010  5.00  0.00           H  
ATOM    715  P    DT A  23     -22.095  -6.306   2.810  9.00  0.00           P  
ATOM    716  C5'  DT A  23     -20.368  -7.208   4.670  4.00  0.00           C  
ATOM    717  O5'  DT A  23     -21.603  -7.394   3.950  3.00  0.00           O  
ATOM    718  C4'  DT A  23     -20.267  -8.202   5.910  8.00  0.00           C  
ATOM    719  O4'  DT A  23     -21.284  -7.941   6.860  4.00  0.00           O  
ATOM    720  C3'  DT A  23     -20.114  -9.709   5.690  3.00  0.00           C  
ATOM    721  O3'  DT A  23     -19.213 -10.132   6.720  1.00  0.00           O  
ATOM    722  C2'  DT A  23     -21.570 -10.138   6.090  5.00  0.00           C  
ATOM    723  C1'  DT A  23     -21.806  -9.226   7.230  6.00  0.00           C  
ATOM    724  N1   DT A  23     -23.206  -9.235   7.650  5.00  0.00           N  
ATOM    725  C2   DT A  23     -23.497  -9.672   8.970  7.00  0.00           C  
ATOM    726  O2   DT A  23     -22.764  -9.904   9.930  7.00  0.00           O  
ATOM    727  N3   DT A  23     -24.851 -10.040   9.130  4.00  0.00           N  
ATOM    728  C4   DT A  23     -25.910  -9.855   8.250  4.00  0.00           C  
ATOM    729  O4   DT A  23     -26.963 -10.389   8.500  0.00  0.00           O  
ATOM    730  C5   DT A  23     -25.516  -9.092   7.070  8.00  0.00           C  
ATOM    731  C6   DT A  23     -24.200  -8.934   6.730  5.00  0.00           C  
ATOM    732  C7   DT A  23     -26.590  -8.639   6.050  7.00  0.00           C  
ATOM    733  OP1  DT A  23     -21.063  -6.001   1.830  1.00  0.00           O  
ATOM    734  OP2  DT A  23     -23.408  -6.834   2.280  5.00  0.00           O1-
ATOM    735  H3   DT A  23     -25.123 -10.445   9.970  0.00  0.00           H  
ATOM    736  H6   DT A  23     -23.923  -8.600   5.770  5.00  0.00           H  
ATOM    737  H1'  DT A  23     -21.225  -9.536   8.050  2.00  0.00           H  
ATOM    738  H2'  DT A  23     -22.252  -9.916   5.270  2.00  0.00           H  
ATOM    739  H3'  DT A  23     -19.740  -9.990   4.690  7.00  0.00           H  
ATOM    740  H4'  DT A  23     -19.364  -7.914   6.450  6.00  0.00           H  
ATOM    741  H5'  DT A  23     -20.252  -6.175   4.940  6.00  0.00           H  
ATOM    742  H71  DT A  23     -27.188  -7.943   6.610  5.00  0.00           H  
ATOM    743  H72  DT A  23     -26.112  -8.138   5.230  9.00  0.00           H  
ATOM    744  H73  DT A  23     -27.097  -9.541   5.740  3.00  0.00           H  
ATOM    745 H2''  DT A  23     -21.594 -11.160   6.390  1.00  0.00           H  
ATOM    746 H5''  DT A  23     -19.592  -7.351   3.930  6.00  0.00           H  
ATOM    747  P    DA A  24     -18.704 -11.680   6.850  1.00  0.00           P  
ATOM    748  C5'  DA A  24     -19.865 -12.077   9.230  7.00  0.00           C  
ATOM    749  O5'  DA A  24     -19.756 -12.358   7.790  7.00  0.00           O  
ATOM    750  C4'  DA A  24     -20.681 -12.955  10.110  2.00  0.00           C  
ATOM    751  O4'  DA A  24     -22.081 -12.754   9.870  1.00  0.00           O  
ATOM    752  C3'  DA A  24     -20.370 -14.426   9.840  3.00  0.00           C  
ATOM    753  O3'  DA A  24     -20.179 -15.139  11.060  6.00  0.00           O  
ATOM    754  C2'  DA A  24     -21.583 -14.746   9.050  1.00  0.00           C  
ATOM    755  C1'  DA A  24     -22.731 -14.000   9.730  1.00  0.00           C  
ATOM    756  N1   DA A  24     -25.431 -12.493   5.640  1.00  0.00           N  
ATOM    757  C2   DA A  24     -24.135 -12.648   5.790  8.00  0.00           C  
ATOM    758  N3   DA A  24     -23.462 -13.084   6.850  7.00  0.00           N  
ATOM    759  C4   DA A  24     -24.303 -13.487   7.810  8.00  0.00           C  
ATOM    760  C5   DA A  24     -25.653 -13.417   7.770  7.00  0.00           C  
ATOM    761  C6   DA A  24     -26.225 -12.906   6.610  9.00  0.00           C  
ATOM    762  N6   DA A  24     -27.531 -12.748   6.370  1.00  0.00           N  
ATOM    763  N7   DA A  24     -26.260 -13.841   8.960  1.00  0.00           N  
ATOM    764  C8   DA A  24     -25.230 -14.147   9.690  4.00  0.00           C  
ATOM    765  N9   DA A  24     -24.054 -13.913   9.090  2.00  0.00           N  
ATOM    766  OP1  DA A  24     -17.384 -11.745   7.450  0.00  0.00           O  
ATOM    767  OP2  DA A  24     -18.881 -12.317   5.510  6.00  0.00           O1-
ATOM    768  H2   DA A  24     -23.572 -12.351   4.860  9.00  0.00           H  
ATOM    769  H8   DA A  24     -25.344 -14.517  10.620  9.00  0.00           H  
ATOM    770  H1'  DA A  24     -22.859 -14.411  10.770  0.00  0.00           H  
ATOM    771  H2'  DA A  24     -21.459 -14.452   7.960  7.00  0.00           H  
ATOM    772  H3'  DA A  24     -19.494 -14.569   9.160  1.00  0.00           H  
ATOM    773  H4'  DA A  24     -20.494 -12.731  11.150  6.00  0.00           H  
ATOM    774  H5'  DA A  24     -20.335 -11.108   9.400  4.00  0.00           H  
ATOM    775  H61  DA A  24     -27.880 -12.459   5.460  1.00  0.00           H  
ATOM    776  H62  DA A  24     -28.067 -12.998   7.080  5.00  0.00           H  
ATOM    777 H2''  DA A  24     -21.863 -15.833   9.050  2.00  0.00           H  
ATOM    778 H5''  DA A  24     -18.831 -12.075   9.630  7.00  0.00           H  
ATOM    779  P    DG A  25     -20.208 -16.762  11.180  6.00  0.00           P  
ATOM    780  C5'  DG A  25     -22.620 -17.158  12.250  2.00  0.00           C  
ATOM    781  O5'  DG A  25     -21.717 -17.133  11.090  2.00  0.00           O  
ATOM    782  C4'  DG A  25     -24.061 -17.615  11.840  5.00  0.00           C  
ATOM    783  O4'  DG A  25     -24.436 -16.978  10.660  3.00  0.00           O  
ATOM    784  C3'  DG A  25     -24.159 -19.111  11.450  1.00  0.00           C  
ATOM    785  O3'  DG A  25     -25.381 -19.620  11.850  1.00  0.00           O  
ATOM    786  C2'  DG A  25     -23.936 -19.032   9.930  9.00  0.00           C  
ATOM    787  C1'  DG A  25     -24.929 -17.927   9.670  8.00  0.00           C  
ATOM    788  N1   DG A  25     -28.020 -16.026   6.170  2.00  0.00           N  
ATOM    789  C2   DG A  25     -28.278 -16.479   7.440  2.00  0.00           C  
ATOM    790  N2   DG A  25     -29.575 -16.503   7.770  7.00  0.00           N  
ATOM    791  N3   DG A  25     -27.386 -16.862   8.270  2.00  0.00           N  
ATOM    792  C4   DG A  25     -26.097 -16.816   7.790  9.00  0.00           C  
ATOM    793  C5   DG A  25     -25.691 -16.500   6.470  4.00  0.00           C  
ATOM    794  C6   DG A  25     -26.754 -16.130   5.560  4.00  0.00           C  
ATOM    795  O6   DG A  25     -26.684 -15.916   4.380  3.00  0.00           O  
ATOM    796  N7   DG A  25     -24.323 -16.659   6.310  0.00  0.00           N  
ATOM    797  C8   DG A  25     -23.979 -17.107   7.480  9.00  0.00           C  
ATOM    798  N9   DG A  25     -25.008 -17.361   8.350  4.00  0.00           N  
ATOM    799  OP1  DG A  25     -19.698 -17.130  12.500  8.00  0.00           O  
ATOM    800  OP2  DG A  25     -19.613 -17.362  10.000  2.00  0.00           O1-
ATOM    801  H1   DG A  25     -28.782 -15.769   5.570  3.00  0.00           H  
ATOM    802  H8   DG A  25     -22.985 -17.316   7.740  2.00  0.00           H  
ATOM    803  H1'  DG A  25     -25.942 -18.197   9.920  2.00  0.00           H  
ATOM    804  H2'  DG A  25     -22.902 -18.727   9.700  5.00  0.00           H  
ATOM    805  H21  DG A  25     -30.199 -16.169   7.100  8.00  0.00           H  
ATOM    806  H3'  DG A  25     -23.272 -19.678  11.850  1.00  0.00           H  
ATOM    807  H22  DG A  25     -29.760 -16.842   8.710  3.00  0.00           H  
ATOM    808  H4'  DG A  25     -24.743 -17.395  12.670  2.00  0.00           H  
ATOM    809  H5'  DG A  25     -22.608 -16.198  12.800  9.00  0.00           H  
ATOM    810 H2''  DG A  25     -24.170 -19.888   9.400  7.00  0.00           H  
ATOM    811 H5''  DG A  25     -22.231 -17.877  12.950  3.00  0.00           H  
ATOM    812  P    DG A  26     -25.615 -21.151  12.050  2.00  0.00           P  
ATOM    813  C5'  DG A  26     -26.939 -21.299   9.850  1.00  0.00           C  
ATOM    814  O5'  DG A  26     -25.875 -21.701  10.650  8.00  0.00           O  
ATOM    815  C4'  DG A  26     -28.151 -22.067  10.140  6.00  0.00           C  
ATOM    816  O4'  DG A  26     -29.346 -21.357   9.580  7.00  0.00           O  
ATOM    817  C3'  DG A  26     -28.121 -23.481   9.580  5.00  0.00           C  
ATOM    818  O3'  DG A  26     -28.849 -24.290  10.480  0.00  0.00           O  
ATOM    819  C2'  DG A  26     -28.824 -23.191   8.250  5.00  0.00           C  
ATOM    820  C1'  DG A  26     -29.867 -22.049   8.520  7.00  0.00           C  
ATOM    821  N1   DG A  26     -28.083 -18.865   4.830  2.00  0.00           N  
ATOM    822  C2   DG A  26     -27.442 -19.771   5.550  9.00  0.00           C  
ATOM    823  N2   DG A  26     -26.170 -19.727   5.570  8.00  0.00           N  
ATOM    824  N3   DG A  26     -27.978 -20.643   6.440  5.00  0.00           N  
ATOM    825  C4   DG A  26     -29.327 -20.492   6.530  6.00  0.00           C  
ATOM    826  C5   DG A  26     -30.075 -19.531   5.860  7.00  0.00           C  
ATOM    827  C6   DG A  26     -29.474 -18.693   4.870  9.00  0.00           C  
ATOM    828  O6   DG A  26     -30.033 -17.900   4.110  2.00  0.00           O  
ATOM    829  N7   DG A  26     -31.419 -19.634   6.210  6.00  0.00           N  
ATOM    830  C8   DG A  26     -31.417 -20.611   7.050  6.00  0.00           C  
ATOM    831  N9   DG A  26     -30.187 -21.165   7.340  4.00  0.00           N  
ATOM    832  OP1  DG A  26     -26.834 -21.200  12.870  2.00  0.00           O  
ATOM    833  OP2  DG A  26     -24.426 -21.708  12.680  2.00  0.00           O1-
ATOM    834  H1   DG A  26     -27.522 -18.373   4.190  7.00  0.00           H  
ATOM    835  H8   DG A  26     -32.302 -20.930   7.600  0.00  0.00           H  
ATOM    836  H1'  DG A  26     -30.822 -22.451   8.880  8.00  0.00           H  
ATOM    837  H2'  DG A  26     -27.979 -22.900   7.680  5.00  0.00           H  
ATOM    838  H21  DG A  26     -25.633 -19.086   5.030  3.00  0.00           H  
ATOM    839  H3'  DG A  26     -27.222 -23.971   9.410  4.00  0.00           H  
ATOM    840  H22  DG A  26     -25.631 -20.511   5.980  4.00  0.00           H  
ATOM    841  H4'  DG A  26     -28.308 -22.072  11.180  3.00  0.00           H  
ATOM    842  H5'  DG A  26     -26.571 -21.549   8.840  4.00  0.00           H  
ATOM    843 H2''  DG A  26     -29.189 -24.062   7.840  0.00  0.00           H  
ATOM    844 H5''  DG A  26     -27.112 -20.200   9.910  6.00  0.00           H  
ATOM    845  P    DG A  27     -29.246 -25.802  10.050  5.00  0.00           P  
ATOM    846  C5'  DG A  27     -31.809 -25.062   9.560  4.00  0.00           C  
ATOM    847  O5'  DG A  27     -30.551 -25.578   9.070  5.00  0.00           O  
ATOM    848  C4'  DG A  27     -32.874 -25.034   8.460  9.00  0.00           C  
ATOM    849  O4'  DG A  27     -32.482 -23.967   7.590  7.00  0.00           O  
ATOM    850  C3'  DG A  27     -33.011 -26.345   7.690  0.00  0.00           C  
ATOM    851  O3'  DG A  27     -34.451 -26.677   7.590  7.00  0.00           O  
ATOM    852  C2'  DG A  27     -32.355 -26.040   6.320  0.00  0.00           C  
ATOM    853  C1'  DG A  27     -32.543 -24.510   6.250  5.00  0.00           C  
ATOM    854  N1   DG A  27     -32.218 -20.652   2.920  9.00  0.00           N  
ATOM    855  C2   DG A  27     -33.250 -21.048   3.760  6.00  0.00           C  
ATOM    856  N2   DG A  27     -34.418 -20.489   3.650  8.00  0.00           N  
ATOM    857  N3   DG A  27     -33.092 -22.076   4.550  9.00  0.00           N  
ATOM    858  C4   DG A  27     -31.842 -22.689   4.600  7.00  0.00           C  
ATOM    859  C5   DG A  27     -30.766 -22.306   3.880  7.00  0.00           C  
ATOM    860  C6   DG A  27     -30.889 -21.162   2.960  3.00  0.00           C  
ATOM    861  O6   DG A  27     -30.073 -20.660   2.210  2.00  0.00           O  
ATOM    862  N7   DG A  27     -29.653 -23.205   4.240  2.00  0.00           N  
ATOM    863  C8   DG A  27     -30.206 -23.999   5.120  1.00  0.00           C  
ATOM    864  N9   DG A  27     -31.544 -23.793   5.330  0.00  0.00           N  
ATOM    865  OP1  DG A  27     -29.758 -26.547  11.200  0.00  0.00           O  
ATOM    866  OP2  DG A  27     -28.157 -26.311   9.220  4.00  0.00           O1-
ATOM    867  H1   DG A  27     -32.518 -19.963   2.310  6.00  0.00           H  
ATOM    868  H8   DG A  27     -29.687 -24.853   5.520  9.00  0.00           H  
ATOM    869  H1'  DG A  27     -33.497 -24.370   5.870  9.00  0.00           H  
ATOM    870  H2'  DG A  27     -31.294 -26.294   6.330  0.00  0.00           H  
ATOM    871  H21  DG A  27     -34.716 -19.925   2.840  9.00  0.00           H  
ATOM    872  H3'  DG A  27     -32.429 -27.206   8.140  6.00  0.00           H  
ATOM    873  H22  DG A  27     -35.121 -20.674   4.350  3.00  0.00           H  
ATOM    874  H4'  DG A  27     -33.841 -24.790   8.860  1.00  0.00           H  
ATOM    875  H5'  DG A  27     -31.728 -24.018   9.930  0.00  0.00           H  
ATOM    876 H2''  DG A  27     -32.847 -26.538   5.470  1.00  0.00           H  
ATOM    877 H5''  DG A  27     -32.014 -25.566  10.500  9.00  0.00           H  
ATOM    878  P    DT A  28     -35.025 -28.101   7.190  3.00  0.00           P  
ATOM    879  C5'  DT A  28     -36.338 -28.633   4.970  3.00  0.00           C  
ATOM    880  O5'  DT A  28     -35.496 -27.837   5.730  5.00  0.00           O  
ATOM    881  C4'  DT A  28     -36.745 -28.056   3.500  9.00  0.00           C  
ATOM    882  O4'  DT A  28     -37.313 -26.779   3.800  0.00  0.00           O  
ATOM    883  C3'  DT A  28     -35.591 -27.862   2.530  7.00  0.00           C  
ATOM    884  O3'  DT A  28     -36.064 -28.036   1.190  7.00  0.00           O  
ATOM    885  C2'  DT A  28     -35.325 -26.349   2.670  4.00  0.00           C  
ATOM    886  C1'  DT A  28     -36.767 -25.915   2.940  0.00  0.00           C  
ATOM    887  N1   DT A  28     -36.829 -24.562   3.620  1.00  0.00           N  
ATOM    888  C2   DT A  28     -36.917 -23.429   2.810  7.00  0.00           C  
ATOM    889  O2   DT A  28     -36.647 -23.403   1.640  1.00  0.00           O  
ATOM    890  N3   DT A  28     -37.241 -22.219   3.470  6.00  0.00           N  
ATOM    891  C4   DT A  28     -37.088 -22.034   4.820  8.00  0.00           C  
ATOM    892  O4   DT A  28     -37.325 -20.958   5.330  8.00  0.00           O  
ATOM    893  C5   DT A  28     -36.579 -23.165   5.590  5.00  0.00           C  
ATOM    894  C6   DT A  28     -36.556 -24.410   4.970  7.00  0.00           C  
ATOM    895  C7   DT A  28     -36.145 -23.015   7.010  3.00  0.00           C  
ATOM    896  OP1  DT A  28     -36.223 -28.338   8.040  2.00  0.00           O  
ATOM    897  OP2  DT A  28     -33.947 -29.083   7.120  7.00  0.00           O1-
ATOM    898  H3   DT A  28     -37.372 -21.414   2.890  9.00  0.00           H  
ATOM    899  H6   DT A  28     -36.238 -25.251   5.540  3.00  0.00           H  
ATOM    900  H1'  DT A  28     -37.388 -25.776   2.000  5.00  0.00           H  
ATOM    901  H2'  DT A  28     -34.633 -26.160   3.510  8.00  0.00           H  
ATOM    902  H3'  DT A  28     -34.722 -28.364   2.810  6.00  0.00           H  
ATOM    903  H4'  DT A  28     -37.459 -28.742   3.090  2.00  0.00           H  
ATOM    904  H5'  DT A  28     -37.230 -28.808   5.640  1.00  0.00           H  
ATOM    905  H71  DT A  28     -36.995 -22.623   7.570  7.00  0.00           H  
ATOM    906  H72  DT A  28     -35.802 -23.948   7.430  5.00  0.00           H  
ATOM    907  H73  DT A  28     -35.316 -22.277   7.070  7.00  0.00           H  
ATOM    908 H2''  DT A  28     -34.988 -25.886   1.770  7.00  0.00           H  
ATOM    909 H5''  DT A  28     -35.974 -29.606   4.740  5.00  0.00           H  
ATOM    910  P    DT A  29     -36.259 -29.412   0.490  2.00  0.00           P  
ATOM    911  C5'  DT A  29     -34.331 -28.981  -1.190  6.00  0.00           C  
ATOM    912  O5'  DT A  29     -34.737 -29.766  -0.040  3.00  0.00           O  
ATOM    913  C4'  DT A  29     -32.788 -29.031  -1.420  4.00  0.00           C  
ATOM    914  O4'  DT A  29     -32.442 -28.035  -2.400  8.00  0.00           O  
ATOM    915  C3'  DT A  29     -31.907 -28.803  -0.160  6.00  0.00           C  
ATOM    916  O3'  DT A  29     -30.688 -29.389  -0.500  2.00  0.00           O  
ATOM    917  C2'  DT A  29     -31.910 -27.301  -0.230  4.00  0.00           C  
ATOM    918  C1'  DT A  29     -31.810 -26.936  -1.740  9.00  0.00           C  
ATOM    919  N1   DT A  29     -32.466 -25.629  -2.120  5.00  0.00           N  
ATOM    920  C2   DT A  29     -31.715 -24.746  -2.970  8.00  0.00           C  
ATOM    921  O2   DT A  29     -30.592 -24.933  -3.370  9.00  0.00           O  
ATOM    922  N3   DT A  29     -32.301 -23.479  -3.150  6.00  0.00           N  
ATOM    923  C4   DT A  29     -33.597 -23.166  -2.950  0.00  0.00           C  
ATOM    924  O4   DT A  29     -34.078 -22.122  -3.420  4.00  0.00           O  
ATOM    925  C5   DT A  29     -34.281 -24.209  -2.110  0.00  0.00           C  
ATOM    926  C6   DT A  29     -33.661 -25.312  -1.650  3.00  0.00           C  
ATOM    927  C7   DT A  29     -35.757 -23.876  -1.680  2.00  0.00           C  
ATOM    928  OP1  DT A  29     -37.042 -29.182  -0.740  5.00  0.00           O  
ATOM    929  OP2  DT A  29     -36.641 -30.402   1.480  2.00  0.00           O1-
ATOM    930  H3   DT A  29     -31.721 -22.734  -3.690  4.00  0.00           H  
ATOM    931  H6   DT A  29     -34.205 -26.033  -1.100  6.00  0.00           H  
ATOM    932  H1'  DT A  29     -30.793 -26.798  -2.020  1.00  0.00           H  
ATOM    933  H2'  DT A  29     -32.832 -26.977   0.170  5.00  0.00           H  
ATOM    934  H3'  DT A  29     -32.277 -29.272   0.660  4.00  0.00           H  
ATOM    935  H4'  DT A  29     -32.549 -30.046  -1.880  0.00  0.00           H  
ATOM    936  H5'  DT A  29     -34.665 -27.909  -1.080  3.00  0.00           H  
ATOM    937  H71  DT A  29     -35.915 -22.824  -1.420  2.00  0.00           H  
ATOM    938  H72  DT A  29     -36.426 -24.078  -2.540  4.00  0.00           H  
ATOM    939  H73  DT A  29     -36.026 -24.553  -0.840  4.00  0.00           H  
ATOM    940 H2''  DT A  29     -31.069 -26.865   0.180  6.00  0.00           H  
ATOM    941 H5''  DT A  29     -34.922 -29.386  -2.060  8.00  0.00           H  
ATOM    942  P    DA A  30     -29.528 -29.515   0.500  0.00  0.00           P  
ATOM    943  C5'  DA A  30     -28.370 -27.605  -0.770  4.00  0.00           C  
ATOM    944  O5'  DA A  30     -29.105 -28.060   0.350  0.00  0.00           O  
ATOM    945  C4'  DA A  30     -27.903 -26.184  -0.470  3.00  0.00           C  
ATOM    946  O4'  DA A  30     -28.942 -25.227  -0.650  8.00  0.00           O  
ATOM    947  C3'  DA A  30     -27.293 -25.954   0.910  3.00  0.00           C  
ATOM    948  O3'  DA A  30     -26.164 -25.059   0.940  1.00  0.00           O  
ATOM    949  C2'  DA A  30     -28.399 -25.323   1.640  1.00  0.00           C  
ATOM    950  C1'  DA A  30     -29.115 -24.482   0.610  9.00  0.00           C  
ATOM    951  N1   DA A  30     -32.716 -21.166  -0.650  4.00  0.00           N  
ATOM    952  C2   DA A  30     -31.488 -21.298  -1.040  8.00  0.00           C  
ATOM    953  N3   DA A  30     -30.654 -22.247  -0.700  3.00  0.00           N  
ATOM    954  C4   DA A  30     -31.185 -23.214   0.110  6.00  0.00           C  
ATOM    955  C5   DA A  30     -32.513 -23.210   0.590  6.00  0.00           C  
ATOM    956  C6   DA A  30     -33.229 -22.089   0.180  6.00  0.00           C  
ATOM    957  N6   DA A  30     -34.421 -21.802   0.580  0.00  0.00           N  
ATOM    958  N7   DA A  30     -32.697 -24.281   1.500  3.00  0.00           N  
ATOM    959  C8   DA A  30     -31.512 -24.827   1.550  6.00  0.00           C  
ATOM    960  N9   DA A  30     -30.563 -24.209   0.790  0.00  0.00           N  
ATOM    961  OP1  DA A  30     -28.663 -30.484  -0.160  5.00  0.00           O  
ATOM    962  OP2  DA A  30     -30.116 -29.778   1.840  6.00  0.00           O1-
ATOM    963  H2   DA A  30     -31.098 -20.680  -1.830  9.00  0.00           H  
ATOM    964  H8   DA A  30     -31.257 -25.650   2.190  7.00  0.00           H  
ATOM    965  H1'  DA A  30     -28.513 -23.501   0.490  5.00  0.00           H  
ATOM    966  H2'  DA A  30     -29.086 -26.118   2.020  1.00  0.00           H  
ATOM    967  H3'  DA A  30     -26.996 -26.903   1.330  6.00  0.00           H  
ATOM    968  H4'  DA A  30     -27.143 -25.983  -1.150  7.00  0.00           H  
ATOM    969  H5'  DA A  30     -28.982 -27.417  -1.650  4.00  0.00           H  
ATOM    970  H61  DA A  30     -34.841 -20.912   0.230  5.00  0.00           H  
ATOM    971  H62  DA A  30     -34.939 -22.311   1.250  4.00  0.00           H  
ATOM    972 H2''  DA A  30     -28.160 -24.699   2.550  5.00  0.00           H  
ATOM    973 H5''  DA A  30     -27.535 -28.263  -1.120  6.00  0.00           H  
ATOM    974  P    DG A  31     -25.021 -25.154   1.980  9.00  0.00           P  
ATOM    975  C5'  DG A  31     -23.153 -24.636   0.170  1.00  0.00           C  
ATOM    976  O5'  DG A  31     -23.972 -24.166   1.270  3.00  0.00           O  
ATOM    977  C4'  DG A  31     -22.256 -23.489  -0.460  7.00  0.00           C  
ATOM    978  O4'  DG A  31     -23.011 -22.663  -1.290  4.00  0.00           O  
ATOM    979  C3'  DG A  31     -21.510 -22.568   0.550  4.00  0.00           C  
ATOM    980  O3'  DG A  31     -20.245 -22.135   0.080  7.00  0.00           O  
ATOM    981  C2'  DG A  31     -22.420 -21.396   0.540  4.00  0.00           C  
ATOM    982  C1'  DG A  31     -22.912 -21.328  -0.900  7.00  0.00           C  
ATOM    983  N1   DG A  31     -27.852 -20.432   0.280  2.00  0.00           N  
ATOM    984  C2   DG A  31     -26.995 -21.261   0.880  8.00  0.00           C  
ATOM    985  N2   DG A  31     -27.423 -21.843   1.960  1.00  0.00           N  
ATOM    986  N3   DG A  31     -25.753 -21.503   0.490  3.00  0.00           N  
ATOM    987  C4   DG A  31     -25.382 -20.727  -0.580  9.00  0.00           C  
ATOM    988  C5   DG A  31     -26.143 -19.769  -1.270  0.00  0.00           C  
ATOM    989  C6   DG A  31     -27.537 -19.691  -0.810  5.00  0.00           C  
ATOM    990  O6   DG A  31     -28.438 -19.011  -1.290  1.00  0.00           O  
ATOM    991  N7   DG A  31     -25.475 -19.133  -2.320  5.00  0.00           N  
ATOM    992  C8   DG A  31     -24.342 -19.668  -2.180  4.00  0.00           C  
ATOM    993  N9   DG A  31     -24.180 -20.567  -1.200  5.00  0.00           N  
ATOM    994  OP1  DG A  31     -24.526 -26.558   2.070  9.00  0.00           O  
ATOM    995  OP2  DG A  31     -25.446 -24.465   3.290  0.00  0.00           O1-
ATOM    996  H1   DG A  31     -28.723 -20.426   0.770  1.00  0.00           H  
ATOM    997  H8   DG A  31     -23.512 -19.408  -2.780  0.00  0.00           H  
ATOM    998  H1'  DG A  31     -22.039 -20.887  -1.390  9.00  0.00           H  
ATOM    999  H2'  DG A  31     -23.223 -21.657   1.200  6.00  0.00           H  
ATOM   1000  H21  DG A  31     -28.298 -21.578   2.330  9.00  0.00           H  
ATOM   1001  H3'  DG A  31     -21.516 -22.924   1.660  0.00  0.00           H  
ATOM   1002  H22  DG A  31     -26.755 -22.542   2.470  0.00  0.00           H  
ATOM   1003  H4'  DG A  31     -21.552 -23.982  -1.120  0.00  0.00           H  
ATOM   1004  H5'  DG A  31     -23.785 -25.098  -0.650  7.00  0.00           H  
ATOM   1005 H2''  DG A  31     -22.003 -20.525   0.910  5.00  0.00           H  
ATOM   1006 H5''  DG A  31     -22.464 -25.337   0.570  1.00  0.00           H  
ATOM   1007  P    DG A  32     -19.138 -21.482   1.120  0.00  0.00           P  
ATOM   1008  C5'  DG A  32     -19.356 -19.085   0.280  8.00  0.00           C  
ATOM   1009  O5'  DG A  32     -19.473 -19.952   1.390  6.00  0.00           O  
ATOM   1010  C4'  DG A  32     -19.764 -17.648   0.530  1.00  0.00           C  
ATOM   1011  O4'  DG A  32     -21.184 -17.662   0.490  0.00  0.00           O  
ATOM   1012  C3'  DG A  32     -19.321 -16.940   1.800  8.00  0.00           C  
ATOM   1013  O3'  DG A  32     -19.188 -15.514   1.680  5.00  0.00           O  
ATOM   1014  C2'  DG A  32     -20.484 -17.212   2.680  1.00  0.00           C  
ATOM   1015  C1'  DG A  32     -21.663 -17.060   1.680  8.00  0.00           C  
ATOM   1016  N1   DG A  32     -26.488 -16.884   0.390  0.00  0.00           N  
ATOM   1017  C2   DG A  32     -25.360 -16.566  -0.350  2.00  0.00           C  
ATOM   1018  N2   DG A  32     -25.522 -15.958  -1.530  7.00  0.00           N  
ATOM   1019  N3   DG A  32     -24.160 -16.771   0.150  4.00  0.00           N  
ATOM   1020  C4   DG A  32     -24.132 -17.467   1.280  9.00  0.00           C  
ATOM   1021  C5   DG A  32     -25.205 -17.895   1.960  7.00  0.00           C  
ATOM   1022  C6   DG A  32     -26.546 -17.589   1.550  4.00  0.00           C  
ATOM   1023  O6   DG A  32     -27.632 -18.054   2.030  9.00  0.00           O  
ATOM   1024  N7   DG A  32     -24.728 -18.615   3.080  2.00  0.00           N  
ATOM   1025  C8   DG A  32     -23.414 -18.451   3.050  7.00  0.00           C  
ATOM   1026  N9   DG A  32     -22.969 -17.601   2.060  2.00  0.00           N  
ATOM   1027  OP1  DG A  32     -17.833 -21.607   0.410  4.00  0.00           O  
ATOM   1028  OP2  DG A  32     -19.231 -22.243   2.390  9.00  0.00           O1-
ATOM   1029  H1   DG A  32     -27.353 -16.890  -0.130  8.00  0.00           H  
ATOM   1030  H8   DG A  32     -22.771 -18.807   3.820  9.00  0.00           H  
ATOM   1031  H1'  DG A  32     -21.818 -16.002   1.590  5.00  0.00           H  
ATOM   1032  H2'  DG A  32     -20.504 -18.180   3.040  2.00  0.00           H  
ATOM   1033  H21  DG A  32     -26.462 -15.874  -1.920  8.00  0.00           H  
ATOM   1034  H3'  DG A  32     -18.409 -17.402   2.250  4.00  0.00           H  
ATOM   1035  H22  DG A  32     -24.748 -15.807  -2.120  6.00  0.00           H  
ATOM   1036  H4'  DG A  32     -19.292 -17.263  -0.360  4.00  0.00           H  
ATOM   1037  H5'  DG A  32     -19.974 -19.447  -0.450  6.00  0.00           H  
ATOM   1038 H2''  DG A  32     -20.464 -16.584   3.540  1.00  0.00           H  
ATOM   1039 H5''  DG A  32     -18.339 -19.148  -0.100  1.00  0.00           H  
ATOM   1040  P    DG A  33     -17.910 -14.721   2.060  6.00  0.00           P  
ATOM   1041  C5'  DG A  33     -18.297 -13.213  -0.120  5.00  0.00           C  
ATOM   1042  O5'  DG A  33     -18.126 -13.298   1.280  1.00  0.00           O  
ATOM   1043  C4'  DG A  33     -19.643 -13.652  -0.610  5.00  0.00           C  
ATOM   1044  O4'  DG A  33     -20.760 -13.023  -0.050  2.00  0.00           O  
ATOM   1045  C3'  DG A  33     -19.843 -13.461  -2.040  5.00  0.00           C  
ATOM   1046  O3'  DG A  33     -19.261 -12.338  -2.640  1.00  0.00           O  
ATOM   1047  C2'  DG A  33     -21.405 -13.391  -2.100  6.00  0.00           C  
ATOM   1048  C1'  DG A  33     -21.844 -13.639  -0.750  8.00  0.00           C  
ATOM   1049  N1   DG A  33     -25.678 -14.370   2.400  0.00  0.00           N  
ATOM   1050  C2   DG A  33     -24.333 -14.423   2.660  6.00  0.00           C  
ATOM   1051  N2   DG A  33     -24.015 -15.221   3.570  8.00  0.00           N  
ATOM   1052  N3   DG A  33     -23.390 -14.061   1.810  8.00  0.00           N  
ATOM   1053  C4   DG A  33     -23.907 -13.376   0.710  2.00  0.00           C  
ATOM   1054  C5   DG A  33     -25.197 -13.078   0.410  7.00  0.00           C  
ATOM   1055  C6   DG A  33     -26.159 -13.616   1.340  6.00  0.00           C  
ATOM   1056  O6   DG A  33     -27.379 -13.474   1.350  2.00  0.00           O  
ATOM   1057  N7   DG A  33     -25.391 -12.422  -0.780  3.00  0.00           N  
ATOM   1058  C8   DG A  33     -24.118 -12.369  -1.140  4.00  0.00           C  
ATOM   1059  N9   DG A  33     -23.198 -13.051  -0.370  5.00  0.00           N  
ATOM   1060  OP1  DG A  33     -16.741 -15.394   1.470  0.00  0.00           O  
ATOM   1061  OP2  DG A  33     -17.855 -14.508   3.480  2.00  0.00           O1-
ATOM   1062  H1   DG A  33     -26.369 -14.733   3.100  4.00  0.00           H  
ATOM   1063  H8   DG A  33     -23.919 -12.075  -2.200  3.00  0.00           H  
ATOM   1064  H1'  DG A  33     -21.903 -14.751  -0.580  6.00  0.00           H  
ATOM   1065  H2'  DG A  33     -21.744 -12.415  -2.410  3.00  0.00           H  
ATOM   1066  H21  DG A  33     -24.740 -15.598   4.190  9.00  0.00           H  
ATOM   1067  H3'  DG A  33     -19.458 -14.355  -2.600  1.00  0.00           H  
ATOM   1068  H22  DG A  33     -23.032 -15.071   3.860  3.00  0.00           H  
ATOM   1069  H4'  DG A  33     -19.730 -14.751  -0.430  0.00  0.00           H  
ATOM   1070  H5'  DG A  33     -17.557 -13.847  -0.670  3.00  0.00           H  
ATOM   1071 H2''  DG A  33     -21.774 -14.068  -2.840  2.00  0.00           H  
ATOM   1072 H5''  DG A  33     -18.162 -12.222  -0.500  1.00  0.00           H  
ATOM   1073  P    DT A  34     -18.892 -12.192  -4.220  0.00  0.00           P  
ATOM   1074  C5'  DT A  34     -20.535 -10.180  -4.590  8.00  0.00           C  
ATOM   1075  O5'  DT A  34     -19.154 -10.599  -4.570  3.00  0.00           O  
ATOM   1076  C4'  DT A  34     -20.778  -8.609  -4.450  7.00  0.00           C  
ATOM   1077  O4'  DT A  34     -20.249  -8.080  -3.200  9.00  0.00           O  
ATOM   1078  C3'  DT A  34     -20.102  -7.773  -5.540  7.00  0.00           C  
ATOM   1079  O3'  DT A  34     -20.953  -6.725  -5.960  1.00  0.00           O  
ATOM   1080  C2'  DT A  34     -18.783  -7.329  -4.970  4.00  0.00           C  
ATOM   1081  C1'  DT A  34     -19.234  -7.149  -3.500  1.00  0.00           C  
ATOM   1082  N1   DT A  34     -18.065  -7.268  -2.560  7.00  0.00           N  
ATOM   1083  C2   DT A  34     -17.615  -6.066  -2.000  5.00  0.00           C  
ATOM   1084  O2   DT A  34     -18.178  -5.008  -2.320  0.00  0.00           O  
ATOM   1085  N3   DT A  34     -16.446  -6.074  -1.270  9.00  0.00           N  
ATOM   1086  C4   DT A  34     -15.863  -7.224  -0.840  1.00  0.00           C  
ATOM   1087  O4   DT A  34     -14.894  -7.075  -0.110  2.00  0.00           O  
ATOM   1088  C5   DT A  34     -16.412  -8.529  -1.320  4.00  0.00           C  
ATOM   1089  C6   DT A  34     -17.434  -8.457  -2.200  5.00  0.00           C  
ATOM   1090  C7   DT A  34     -15.677  -9.873  -1.190  1.00  0.00           C  
ATOM   1091  OP1  DT A  34     -19.787 -12.991  -5.050  7.00  0.00           O  
ATOM   1092  OP2  DT A  34     -17.466 -12.449  -4.260  8.00  0.00           O1-
ATOM   1093  H3   DT A  34     -16.212  -5.243  -0.780  3.00  0.00           H  
ATOM   1094  H6   DT A  34     -17.736  -9.305  -2.800  7.00  0.00           H  
ATOM   1095  H1'  DT A  34     -19.826  -6.206  -3.450  0.00  0.00           H  
ATOM   1096  H2'  DT A  34     -18.076  -8.155  -5.050  1.00  0.00           H  
ATOM   1097  H3'  DT A  34     -19.844  -8.341  -6.560  4.00  0.00           H  
ATOM   1098  H4'  DT A  34     -21.853  -8.502  -4.560  3.00  0.00           H  
ATOM   1099  H5'  DT A  34     -20.968 -10.764  -3.740  3.00  0.00           H  
ATOM   1100  H71  DT A  34     -15.938 -10.608  -1.910  0.00  0.00           H  
ATOM   1101  H72  DT A  34     -14.636  -9.659  -1.340  7.00  0.00           H  
ATOM   1102  H73  DT A  34     -15.738 -10.250  -0.180  9.00  0.00           H  
ATOM   1103 H2''  DT A  34     -18.334  -6.425  -5.330  9.00  0.00           H  
ATOM   1104 H5''  DT A  34     -20.990 -10.555  -5.480  8.00  0.00           H  
ATOM   1105  P    DT A  35     -20.972  -6.252  -7.450  0.00  0.00           P  
ATOM   1106  C5'  DT A  35     -19.241  -4.501  -6.830  1.00  0.00           C  
ATOM   1107  O5'  DT A  35     -19.617  -5.579  -7.630  4.00  0.00           O  
ATOM   1108  C4'  DT A  35     -17.766  -4.167  -7.230  4.00  0.00           C  
ATOM   1109  O4'  DT A  35     -16.812  -5.293  -7.050  4.00  0.00           O  
ATOM   1110  C3'  DT A  35     -17.644  -3.697  -8.730  9.00  0.00           C  
ATOM   1111  O3'  DT A  35     -16.933  -2.436  -8.680  7.00  0.00           O  
ATOM   1112  C2'  DT A  35     -16.895  -4.866  -9.380  6.00  0.00           C  
ATOM   1113  C1'  DT A  35     -16.057  -5.487  -8.250  4.00  0.00           C  
ATOM   1114  N1   DT A  35     -15.824  -6.970  -8.340  5.00  0.00           N  
ATOM   1115  C2   DT A  35     -14.505  -7.407  -8.260  3.00  0.00           C  
ATOM   1116  O2   DT A  35     -13.506  -6.682  -8.300  8.00  0.00           O  
ATOM   1117  N3   DT A  35     -14.245  -8.750  -8.130  3.00  0.00           N  
ATOM   1118  C4   DT A  35     -15.205  -9.712  -8.140  4.00  0.00           C  
ATOM   1119  O4   DT A  35     -14.849 -10.910  -8.060  5.00  0.00           O  
ATOM   1120  C5   DT A  35     -16.579  -9.234  -8.180  4.00  0.00           C  
ATOM   1121  C6   DT A  35     -16.866  -7.907  -8.320  4.00  0.00           C  
ATOM   1122  C7   DT A  35     -17.757 -10.167  -7.970  8.00  0.00           C  
ATOM   1123  OP1  DT A  35     -22.128  -5.271  -7.510  5.00  0.00           O  
ATOM   1124  OP2  DT A  35     -21.094  -7.466  -8.380  6.00  0.00           O1-
ATOM   1125  H3   DT A  35     -13.324  -9.042  -7.950  5.00  0.00           H  
ATOM   1126  H6   DT A  35     -17.856  -7.493  -8.280  1.00  0.00           H  
ATOM   1127  H1'  DT A  35     -15.099  -4.987  -8.210  6.00  0.00           H  
ATOM   1128  H2'  DT A  35     -17.524  -5.709  -9.620  3.00  0.00           H  
ATOM   1129  H3'  DT A  35     -18.637  -3.616  -9.050  4.00  0.00           H  
ATOM   1130  H4'  DT A  35     -17.403  -3.388  -6.530  8.00  0.00           H  
ATOM   1131  H5'  DT A  35     -19.399  -4.665  -5.790  7.00  0.00           H  
ATOM   1132  H71  DT A  35     -17.940 -10.603  -8.990  0.00  0.00           H  
ATOM   1133  H72  DT A  35     -17.455 -10.855  -7.130  8.00  0.00           H  
ATOM   1134  H73  DT A  35     -18.733  -9.688  -7.690  8.00  0.00           H  
ATOM   1135 H2''  DT A  35     -16.290  -4.631 -10.260  7.00  0.00           H  
ATOM   1136 H5''  DT A  35     -19.756  -3.481  -7.010  5.00  0.00           H  
ATOM   1137  P    DA A  36     -16.768  -1.510  -9.920  6.00  0.00           P  
ATOM   1138  C5'  DA A  36     -14.227  -2.121 -10.150  7.00  0.00           C  
ATOM   1139  O5'  DA A  36     -15.542  -2.171 -10.720  0.00  0.00           O  
ATOM   1140  C4'  DA A  36     -13.217  -2.932 -10.880  2.00  0.00           C  
ATOM   1141  O4'  DA A  36     -13.196  -4.283 -10.490  7.00  0.00           O  
ATOM   1142  C3'  DA A  36     -13.479  -2.958 -12.360  3.00  0.00           C  
ATOM   1143  O3'  DA A  36     -12.250  -2.591 -12.950  4.00  0.00           O  
ATOM   1144  C2'  DA A  36     -13.757  -4.374 -12.780  6.00  0.00           C  
ATOM   1145  C1'  DA A  36     -13.002  -5.051 -11.650  4.00  0.00           C  
ATOM   1146  N1   DA A  36     -11.007  -9.764 -11.130  7.00  0.00           N  
ATOM   1147  C2   DA A  36     -10.509  -8.539 -10.910  4.00  0.00           C  
ATOM   1148  N3   DA A  36     -11.095  -7.355 -10.990  7.00  0.00           N  
ATOM   1149  C4   DA A  36     -12.421  -7.533 -11.300  4.00  0.00           C  
ATOM   1150  C5   DA A  36     -13.080  -8.679 -11.550  5.00  0.00           C  
ATOM   1151  C6   DA A  36     -12.292  -9.857 -11.410  5.00  0.00           C  
ATOM   1152  N6   DA A  36     -12.753 -11.127 -11.540  6.00  0.00           N  
ATOM   1153  N7   DA A  36     -14.380  -8.420 -11.980  8.00  0.00           N  
ATOM   1154  C8   DA A  36     -14.465  -7.109 -12.010  1.00  0.00           C  
ATOM   1155  N9   DA A  36     -13.294  -6.492 -11.570  4.00  0.00           N  
ATOM   1156  OP1  DA A  36     -16.319  -0.178  -9.410  9.00  0.00           O  
ATOM   1157  OP2  DA A  36     -18.048  -1.674 -10.710  9.00  0.00           O1-
ATOM   1158  H2   DA A  36      -9.515  -8.577 -10.510  7.00  0.00           H  
ATOM   1159  H8   DA A  36     -15.319  -6.525 -12.300  3.00  0.00           H  
ATOM   1160  H1'  DA A  36     -11.906  -5.054 -11.930  4.00  0.00           H  
ATOM   1161  H2'  DA A  36     -14.818  -4.465 -12.740  5.00  0.00           H  
ATOM   1162  H3'  DA A  36     -14.305  -2.321 -12.660  5.00  0.00           H  
ATOM   1163  H4'  DA A  36     -12.306  -2.463 -10.760  2.00  0.00           H  
ATOM   1164  H5'  DA A  36     -14.231  -2.400  -9.140  5.00  0.00           H  
ATOM   1165  H61  DA A  36     -12.098 -11.918 -11.330  2.00  0.00           H  
ATOM   1166  H62  DA A  36     -13.703 -11.352 -11.760  5.00  0.00           H  
ATOM   1167 H2''  DA A  36     -13.435  -4.584 -13.790  1.00  0.00           H  
ATOM   1168 H5''  DA A  36     -13.956  -1.044 -10.220  0.00  0.00           H  
ATOM   1169  P    DG A  37     -12.108  -1.867 -14.380  6.00  0.00           P  
ATOM   1170  C5'  DG A  37     -11.501  -3.689 -16.180  1.00  0.00           C  
ATOM   1171  O5'  DG A  37     -12.483  -2.970 -15.520  6.00  0.00           O  
ATOM   1172  C4'  DG A  37     -10.530  -4.521 -15.300  5.00  0.00           C  
ATOM   1173  O4'  DG A  37     -11.161  -5.527 -14.550  7.00  0.00           O  
ATOM   1174  C3'  DG A  37      -9.523  -5.281 -16.220  7.00  0.00           C  
ATOM   1175  O3'  DG A  37      -8.468  -4.407 -16.610  7.00  0.00           O  
ATOM   1176  C2'  DG A  37      -8.999  -6.446 -15.320  5.00  0.00           C  
ATOM   1177  C1'  DG A  37     -10.244  -6.592 -14.380  5.00  0.00           C  
ATOM   1178  N1   DG A  37      -9.727 -11.688 -13.720  9.00  0.00           N  
ATOM   1179  C2   DG A  37      -8.792 -10.652 -13.500  9.00  0.00           C  
ATOM   1180  N2   DG A  37      -7.635 -11.112 -13.060  1.00  0.00           N  
ATOM   1181  N3   DG A  37      -8.978  -9.363 -13.760  4.00  0.00           N  
ATOM   1182  C4   DG A  37     -10.262  -9.148 -14.280  0.00  0.00           C  
ATOM   1183  C5   DG A  37     -11.225 -10.099 -14.630  0.00  0.00           C  
ATOM   1184  C6   DG A  37     -10.942 -11.462 -14.350  2.00  0.00           C  
ATOM   1185  O6   DG A  37     -11.510 -12.484 -14.650  8.00  0.00           O  
ATOM   1186  N7   DG A  37     -12.293  -9.478 -15.270  3.00  0.00           N  
ATOM   1187  C8   DG A  37     -11.982  -8.260 -15.320  3.00  0.00           C  
ATOM   1188  N9   DG A  37     -10.793  -7.956 -14.680  4.00  0.00           N  
ATOM   1189  OP1  DG A  37     -10.758  -1.452 -14.560  4.00  0.00           O  
ATOM   1190  OP2  DG A  37     -13.161  -0.787 -14.380  9.00  0.00           O1-
ATOM   1191  H1   DG A  37      -9.445 -12.630 -13.400  2.00  0.00           H  
ATOM   1192  H8   DG A  37     -12.665  -7.473 -15.670  0.00  0.00           H  
ATOM   1193  H1'  DG A  37      -9.939  -6.558 -13.360  3.00  0.00           H  
ATOM   1194  H2'  DG A  37      -8.726  -7.271 -15.990  1.00  0.00           H  
ATOM   1195  H21  DG A  37      -7.365 -12.070 -13.020  5.00  0.00           H  
ATOM   1196  H3'  DG A  37     -10.081  -5.645 -17.110  6.00  0.00           H  
ATOM   1197  H22  DG A  37      -6.925 -10.402 -12.910  4.00  0.00           H  
ATOM   1198  H4'  DG A  37     -10.014  -3.877 -14.570  1.00  0.00           H  
ATOM   1199  H5'  DG A  37     -10.883  -2.922 -16.630  5.00  0.00           H  
ATOM   1200 H2''  DG A  37      -8.155  -6.155 -14.690  9.00  0.00           H  
ATOM   1201 H5''  DG A  37     -11.875  -4.270 -17.030  1.00  0.00           H  
ATOM   1202  P    DG A  38      -7.906  -4.434 -18.120  9.00  0.00           P  
ATOM   1203  C5'  DG A  38      -5.785  -5.828 -17.470  4.00  0.00           C  
ATOM   1204  O5'  DG A  38      -6.988  -5.717 -18.240  3.00  0.00           O  
ATOM   1205  C4'  DG A  38      -5.421  -7.350 -17.370  9.00  0.00           C  
ATOM   1206  O4'  DG A  38      -6.372  -8.164 -16.750  6.00  0.00           O  
ATOM   1207  C3'  DG A  38      -4.962  -8.043 -18.660  2.00  0.00           C  
ATOM   1208  O3'  DG A  38      -3.680  -7.758 -19.150  0.00  0.00           O  
ATOM   1209  C2'  DG A  38      -4.998  -9.525 -18.160  8.00  0.00           C  
ATOM   1210  C1'  DG A  38      -5.956  -9.497 -16.900  1.00  0.00           C  
ATOM   1211  N1   DG A  38      -7.359 -14.436 -16.730  2.00  0.00           N  
ATOM   1212  C2   DG A  38      -6.163 -13.918 -16.440  1.00  0.00           C  
ATOM   1213  N2   DG A  38      -5.223 -14.776 -16.330  4.00  0.00           N  
ATOM   1214  N3   DG A  38      -5.810 -12.614 -16.550  5.00  0.00           N  
ATOM   1215  C4   DG A  38      -6.923 -11.870 -16.910  7.00  0.00           C  
ATOM   1216  C5   DG A  38      -8.169 -12.292 -17.170  1.00  0.00           C  
ATOM   1217  C6   DG A  38      -8.416 -13.722 -17.130  9.00  0.00           C  
ATOM   1218  O6   DG A  38      -9.448 -14.379 -17.440  3.00  0.00           O  
ATOM   1219  N7   DG A  38      -9.015 -11.308 -17.660  3.00  0.00           N  
ATOM   1220  C8   DG A  38      -8.254 -10.268 -17.590  0.00  0.00           C  
ATOM   1221  N9   DG A  38      -7.002 -10.533 -17.140  3.00  0.00           N  
ATOM   1222  OP1  DG A  38      -6.987  -3.222 -18.360  3.00  0.00           O  
ATOM   1223  OP2  DG A  38      -9.021  -4.698 -18.980  0.00  0.00           O1-
ATOM   1224  H1   DG A  38      -7.521 -15.432 -16.420  1.00  0.00           H  
ATOM   1225  H8   DG A  38      -8.482  -9.291 -17.890  5.00  0.00           H  
ATOM   1226  H1'  DG A  38      -5.470  -9.808 -15.970  2.00  0.00           H  
ATOM   1227  H2'  DG A  38      -5.384 -10.137 -18.970  2.00  0.00           H  
ATOM   1228  H21  DG A  38      -5.353 -15.682 -16.740  1.00  0.00           H  
ATOM   1229  H3'  DG A  38      -5.694  -7.817 -19.450  7.00  0.00           H  
ATOM   1230  H22  DG A  38      -4.339 -14.340 -16.090  4.00  0.00           H  
ATOM   1231  H4'  DG A  38      -4.438  -7.346 -16.900  6.00  0.00           H  
ATOM   1232  H5'  DG A  38      -5.886  -5.460 -16.530  1.00  0.00           H  
ATOM   1233 H2''  DG A  38      -4.036  -9.839 -17.890  4.00  0.00           H  
ATOM   1234 H5''  DG A  38      -4.923  -5.358 -17.940  7.00  0.00           H  
ATOM   1235  P    DG A  39      -3.238  -8.321 -20.550  7.00  0.00           P  
ATOM   1236  C5'  DG A  39      -1.565 -10.353 -20.010  5.00  0.00           C  
ATOM   1237  O5'  DG A  39      -2.837  -9.848 -20.530  9.00  0.00           O  
ATOM   1238  C4'  DG A  39      -1.568 -11.878 -19.610  1.00  0.00           C  
ATOM   1239  O4'  DG A  39      -2.794 -12.131 -18.940  7.00  0.00           O  
ATOM   1240  C3'  DG A  39      -1.598 -12.891 -20.770  4.00  0.00           C  
ATOM   1241  O3'  DG A  39      -0.249 -13.009 -21.180  7.00  0.00           O  
ATOM   1242  C2'  DG A  39      -2.000 -14.134 -20.000  0.00  0.00           C  
ATOM   1243  C1'  DG A  39      -3.099 -13.546 -19.180  7.00  0.00           C  
ATOM   1244  N1   DG A  39      -6.833 -16.958 -19.970  7.00  0.00           N  
ATOM   1245  C2   DG A  39      -5.638 -17.144 -19.450  9.00  0.00           C  
ATOM   1246  N2   DG A  39      -5.310 -18.444 -19.330  0.00  0.00           N  
ATOM   1247  N3   DG A  39      -4.759 -16.166 -19.190  2.00  0.00           N  
ATOM   1248  C4   DG A  39      -5.167 -14.937 -19.670  9.00  0.00           C  
ATOM   1249  C5   DG A  39      -6.388 -14.647 -20.320  8.00  0.00           C  
ATOM   1250  C6   DG A  39      -7.313 -15.744 -20.410  9.00  0.00           C  
ATOM   1251  O6   DG A  39      -8.513 -15.688 -20.720  9.00  0.00           O  
ATOM   1252  N7   DG A  39      -6.403 -13.357 -20.730  6.00  0.00           N  
ATOM   1253  C8   DG A  39      -5.280 -12.853 -20.320  5.00  0.00           C  
ATOM   1254  N9   DG A  39      -4.497 -13.752 -19.660  6.00  0.00           N  
ATOM   1255  OP1  DG A  39      -2.038  -7.522 -20.990  7.00  0.00           O  
ATOM   1256  OP2  DG A  39      -4.410  -8.219 -21.400  1.00  0.00           O1-
ATOM   1257  H1   DG A  39      -7.434 -17.827 -19.920  0.00  0.00           H  
ATOM   1258  H8   DG A  39      -4.967 -11.798 -20.420  5.00  0.00           H  
ATOM   1259  H1'  DG A  39      -3.090 -14.117 -18.230  7.00  0.00           H  
ATOM   1260  H2'  DG A  39      -2.325 -14.873 -20.750  6.00  0.00           H  
ATOM   1261  H21  DG A  39      -5.935 -19.202 -19.360  5.00  0.00           H  
ATOM   1262  H3'  DG A  39      -2.331 -12.565 -21.520  0.00  0.00           H  
ATOM   1263  H22  DG A  39      -4.301 -18.543 -19.080  1.00  0.00           H  
ATOM   1264  H4'  DG A  39      -0.661 -12.069 -19.100  0.00  0.00           H  
ATOM   1265  H5'  DG A  39      -1.244  -9.735 -19.190  1.00  0.00           H  
ATOM   1266 H2''  DG A  39      -1.183 -14.440 -19.340  4.00  0.00           H  
ATOM   1267 H5''  DG A  39      -0.807 -10.231 -20.880  2.00  0.00           H  
ATOM   1268  P    DT A  40       0.142 -13.576 -22.650  1.00  0.00           P  
ATOM   1269  C5'  DT A  40       0.720 -15.873 -21.510  2.00  0.00           C  
ATOM   1270  O5'  DT A  40      -0.046 -15.166 -22.520  7.00  0.00           O  
ATOM   1271  C4'  DT A  40       0.093 -17.222 -20.980  6.00  0.00           C  
ATOM   1272  O4'  DT A  40      -1.341 -17.138 -20.730  8.00  0.00           O  
ATOM   1273  C3'  DT A  40       0.363 -18.337 -22.080  1.00  0.00           C  
ATOM   1274  O3'  DT A  40       0.710 -19.586 -21.410  3.00  0.00           O  
ATOM   1275  C2'  DT A  40      -1.005 -18.436 -22.690  8.00  0.00           C  
ATOM   1276  C1'  DT A  40      -1.948 -18.108 -21.570  0.00  0.00           C  
ATOM   1277  N1   DT A  40      -3.221 -17.658 -22.160  2.00  0.00           N  
ATOM   1278  C2   DT A  40      -4.240 -18.610 -22.370  6.00  0.00           C  
ATOM   1279  O2   DT A  40      -4.119 -19.799 -22.170  8.00  0.00           O  
ATOM   1280  N3   DT A  40      -5.398 -18.080 -22.760  1.00  0.00           N  
ATOM   1281  C4   DT A  40      -5.633 -16.769 -23.220  1.00  0.00           C  
ATOM   1282  O4   DT A  40      -6.771 -16.479 -23.680  4.00  0.00           O  
ATOM   1283  C5   DT A  40      -4.430 -15.922 -23.240  2.00  0.00           C  
ATOM   1284  C6   DT A  40      -3.287 -16.396 -22.720  3.00  0.00           C  
ATOM   1285  C7   DT A  40      -4.410 -14.562 -23.880  9.00  0.00           C  
ATOM   1286  OP1  DT A  40       1.593 -13.268 -22.920  2.00  0.00           O  
ATOM   1287  OP2  DT A  40      -0.855 -13.060 -23.600  5.00  0.00           O1-
ATOM   1288  H3   DT A  40      -6.198 -18.630 -22.890  8.00  0.00           H  
ATOM   1289  H6   DT A  40      -2.346 -15.789 -22.760  2.00  0.00           H  
ATOM   1290  H1'  DT A  40      -2.156 -18.955 -21.010  9.00  0.00           H  
ATOM   1291  H2'  DT A  40      -1.050 -17.765 -23.550  5.00  0.00           H  
ATOM   1292  H3'  DT A  40       1.172 -18.045 -22.850  2.00  0.00           H  
ATOM   1293  H4'  DT A  40       0.668 -17.581 -20.080  7.00  0.00           H  
ATOM   1294  H5'  DT A  40       0.706 -15.270 -20.620  9.00  0.00           H  
ATOM   1295  H71  DT A  40      -5.513 -14.248 -23.880  0.00  0.00           H  
ATOM   1296  H72  DT A  40      -3.795 -13.831 -23.310  1.00  0.00           H  
ATOM   1297  H73  DT A  40      -3.992 -14.666 -24.900  4.00  0.00           H  
ATOM   1298 H2''  DT A  40      -1.327 -19.412 -23.060  5.00  0.00           H  
ATOM   1299 H5''  DT A  40       1.764 -16.115 -21.860  2.00  0.00           H  
ATOM   1300  P    DT A  41       1.538 -20.708 -22.150  7.00  0.00           P  
ATOM   1301  C5'  DT A  41      -0.307 -22.579 -22.350  5.00  0.00           C  
ATOM   1302  O5'  DT A  41       0.410 -21.489 -22.970  9.00  0.00           O  
ATOM   1303  C4'  DT A  41      -1.461 -23.158 -23.100  8.00  0.00           C  
ATOM   1304  O4'  DT A  41      -2.249 -22.047 -23.560  3.00  0.00           O  
ATOM   1305  C3'  DT A  41      -0.875 -23.891 -24.380  1.00  0.00           C  
ATOM   1306  O3'  DT A  41      -1.510 -25.187 -24.460  8.00  0.00           O  
ATOM   1307  C2'  DT A  41      -1.279 -22.920 -25.430  7.00  0.00           C  
ATOM   1308  C1'  DT A  41      -2.601 -22.309 -24.920  2.00  0.00           C  
ATOM   1309  N1   DT A  41      -2.993 -21.052 -25.620  2.00  0.00           N  
ATOM   1310  C2   DT A  41      -4.335 -20.886 -26.030  3.00  0.00           C  
ATOM   1311  O2   DT A  41      -5.132 -21.807 -25.850  0.00  0.00           O  
ATOM   1312  N3   DT A  41      -4.699 -19.698 -26.570  4.00  0.00           N  
ATOM   1313  C4   DT A  41      -3.998 -18.560 -26.490  7.00  0.00           C  
ATOM   1314  O4   DT A  41      -4.505 -17.487 -26.830  5.00  0.00           O  
ATOM   1315  C5   DT A  41      -2.584 -18.758 -26.030  4.00  0.00           C  
ATOM   1316  C6   DT A  41      -2.138 -19.993 -25.570  9.00  0.00           C  
ATOM   1317  C7   DT A  41      -1.666 -17.551 -26.070  6.00  0.00           C  
ATOM   1318  OP1  DT A  41       2.117 -21.683 -21.250  7.00  0.00           O  
ATOM   1319  OP2  DT A  41       2.414 -20.006 -23.080  1.00  0.00           O1-
ATOM   1320  H3   DT A  41      -5.677 -19.529 -26.800  3.00  0.00           H  
ATOM   1321  H6   DT A  41      -1.173 -20.128 -25.170  7.00  0.00           H  
ATOM   1322  H1'  DT A  41      -3.344 -23.064 -25.040  2.00  0.00           H  
ATOM   1323  H2'  DT A  41      -0.470 -22.078 -25.460  4.00  0.00           H  
ATOM   1324  H3'  DT A  41       0.192 -23.915 -24.450  8.00  0.00           H  
ATOM   1325  H4'  DT A  41      -1.967 -23.763 -22.410  1.00  0.00           H  
ATOM   1326  H5'  DT A  41      -0.735 -22.224 -21.410  9.00  0.00           H  
ATOM   1327  H71  DT A  41      -2.064 -16.782 -25.470  6.00  0.00           H  
ATOM   1328  H72  DT A  41      -0.594 -17.774 -25.940  5.00  0.00           H  
ATOM   1329  H73  DT A  41      -1.806 -17.117 -27.060  3.00  0.00           H  
ATOM   1330 H2''  DT A  41      -1.338 -23.346 -26.480  7.00  0.00           H  
ATOM   1331 H5''  DT A  41       0.374 -23.449 -22.140  7.00  0.00           H  
ATOM   1332  P    DA A  42      -1.022 -26.319 -25.500  1.00  0.00           P  
ATOM   1333  C5'  DA A  42      -3.297 -26.709 -26.780  9.00  0.00           C  
ATOM   1334  O5'  DA A  42      -1.931 -26.167 -26.770  1.00  0.00           O  
ATOM   1335  C4'  DA A  42      -3.964 -26.471 -28.170  4.00  0.00           C  
ATOM   1336  O4'  DA A  42      -4.147 -25.033 -28.280  3.00  0.00           O  
ATOM   1337  C3'  DA A  42      -3.191 -26.858 -29.410  6.00  0.00           C  
ATOM   1338  O3'  DA A  42      -4.018 -27.752 -30.130  1.00  0.00           O  
ATOM   1339  C2'  DA A  42      -3.029 -25.573 -30.110  4.00  0.00           C  
ATOM   1340  C1'  DA A  42      -4.157 -24.675 -29.660  0.00  0.00           C  
ATOM   1341  N1   DA A  42      -6.446 -20.017 -30.080  4.00  0.00           N  
ATOM   1342  C2   DA A  42      -6.945 -21.253 -30.180  3.00  0.00           C  
ATOM   1343  N3   DA A  42      -6.334 -22.457 -30.070  2.00  0.00           N  
ATOM   1344  C4   DA A  42      -4.973 -22.276 -29.760  4.00  0.00           C  
ATOM   1345  C5   DA A  42      -4.363 -21.014 -29.640  6.00  0.00           C  
ATOM   1346  C6   DA A  42      -5.156 -19.834 -29.780  7.00  0.00           C  
ATOM   1347  N6   DA A  42      -4.710 -18.570 -29.730  3.00  0.00           N  
ATOM   1348  N7   DA A  42      -3.025 -21.158 -29.410  3.00  0.00           N  
ATOM   1349  C8   DA A  42      -2.819 -22.411 -29.360  5.00  0.00           C  
ATOM   1350  N9   DA A  42      -3.939 -23.176 -29.680  6.00  0.00           N  
ATOM   1351  OP1  DA A  42      -1.406 -27.583 -24.880  5.00  0.00           O  
ATOM   1352  OP2  DA A  42       0.377 -26.022 -25.790  9.00  0.00           O1-
ATOM   1353  H2   DA A  42      -7.954 -21.226 -30.540  3.00  0.00           H  
ATOM   1354  H8   DA A  42      -1.792 -22.762 -29.130  4.00  0.00           H  
ATOM   1355  H1'  DA A  42      -5.086 -25.029 -30.020  8.00  0.00           H  
ATOM   1356  H2'  DA A  42      -2.069 -25.166 -29.880  6.00  0.00           H  
ATOM   1357  H3'  DA A  42      -2.195 -27.243 -29.120  0.00  0.00           H  
ATOM   1358  H4'  DA A  42      -4.887 -27.011 -28.220  2.00  0.00           H  
ATOM   1359  H5'  DA A  42      -3.826 -26.158 -26.090  7.00  0.00           H  
ATOM   1360  H61  DA A  42      -5.367 -17.797 -29.770  6.00  0.00           H  
ATOM   1361  H62  DA A  42      -3.654 -18.468 -29.780  1.00  0.00           H  
ATOM   1362 H2''  DA A  42      -3.068 -25.580 -31.160  3.00  0.00           H  
ATOM   1363 H5''  DA A  42      -3.343 -27.767 -26.600  3.00  0.00           H  
ATOM   1364  P    DG A  43      -3.784 -28.267 -31.640  1.00  0.00           P  
ATOM   1365  C5'  DG A  43      -6.239 -27.461 -32.300  3.00  0.00           C  
ATOM   1366  O5'  DG A  43      -4.799 -27.410 -32.520  0.00  0.00           O  
ATOM   1367  C4'  DG A  43      -6.891 -26.390 -33.100  9.00  0.00           C  
ATOM   1368  O4'  DG A  43      -6.427 -25.139 -32.660  7.00  0.00           O  
ATOM   1369  C3'  DG A  43      -6.700 -26.603 -34.640  6.00  0.00           C  
ATOM   1370  O3'  DG A  43      -7.854 -26.565 -35.460  5.00  0.00           O  
ATOM   1371  C2'  DG A  43      -5.738 -25.429 -34.870  8.00  0.00           C  
ATOM   1372  C1'  DG A  43      -6.266 -24.373 -33.840  1.00  0.00           C  
ATOM   1373  N1   DG A  43      -5.859 -19.317 -33.350  9.00  0.00           N  
ATOM   1374  C2   DG A  43      -6.936 -20.082 -33.420  4.00  0.00           C  
ATOM   1375  N2   DG A  43      -8.025 -19.441 -33.680  8.00  0.00           N  
ATOM   1376  N3   DG A  43      -6.966 -21.420 -33.550  2.00  0.00           N  
ATOM   1377  C4   DG A  43      -5.739 -21.939 -33.310  8.00  0.00           C  
ATOM   1378  C5   DG A  43      -4.537 -21.226 -33.200  2.00  0.00           C  
ATOM   1379  C6   DG A  43      -4.592 -19.783 -33.180  5.00  0.00           C  
ATOM   1380  O6   DG A  43      -3.648 -18.993 -33.090  6.00  0.00           O  
ATOM   1381  N7   DG A  43      -3.481 -22.195 -33.120  9.00  0.00           N  
ATOM   1382  C8   DG A  43      -4.020 -23.311 -33.320  9.00  0.00           C  
ATOM   1383  N9   DG A  43      -5.362 -23.244 -33.460  4.00  0.00           N  
ATOM   1384  OP1  DG A  43      -4.296 -29.662 -31.580  5.00  0.00           O  
ATOM   1385  OP2  DG A  43      -2.383 -28.047 -32.010  0.00  0.00           O1-
ATOM   1386  H1   DG A  43      -5.977 -18.314 -33.300  4.00  0.00           H  
ATOM   1387  H8   DG A  43      -3.579 -24.321 -33.360  8.00  0.00           H  
ATOM   1388  H1'  DG A  43      -7.214 -24.011 -34.240  2.00  0.00           H  
ATOM   1389  H2'  DG A  43      -4.681 -25.706 -34.650  8.00  0.00           H  
ATOM   1390  H21  DG A  43      -8.037 -18.450 -33.850  5.00  0.00           H  
ATOM   1391  H3'  DG A  43      -6.204 -27.532 -34.820  4.00  0.00           H  
ATOM   1392  H22  DG A  43      -8.829 -20.019 -33.690  7.00  0.00           H  
ATOM   1393  H4'  DG A  43      -7.915 -26.376 -32.990  6.00  0.00           H  
ATOM   1394  H5'  DG A  43      -6.513 -27.210 -31.300  1.00  0.00           H  
ATOM   1395 H2''  DG A  43      -5.839 -25.094 -35.860  1.00  0.00           H  
ATOM   1396 H5''  DG A  43      -6.689 -28.444 -32.520  3.00  0.00           H  
ATOM   1397  P    DG A  44      -7.831 -26.795 -37.090  3.00  0.00           P  
ATOM   1398  C5'  DG A  44      -9.296 -24.543 -37.170  4.00  0.00           C  
ATOM   1399  O5'  DG A  44      -8.086 -25.223 -37.490  7.00  0.00           O  
ATOM   1400  C4'  DG A  44      -9.168 -23.131 -37.750  7.00  0.00           C  
ATOM   1401  O4'  DG A  44      -8.366 -22.412 -36.830  5.00  0.00           O  
ATOM   1402  C3'  DG A  44      -8.624 -22.696 -39.160  4.00  0.00           C  
ATOM   1403  O3'  DG A  44      -9.626 -22.526 -40.130  0.00  0.00           O  
ATOM   1404  C2'  DG A  44      -7.791 -21.466 -38.790  1.00  0.00           C  
ATOM   1405  C1'  DG A  44      -7.988 -21.170 -37.320  8.00  0.00           C  
ATOM   1406  N1   DG A  44      -5.397 -16.859 -36.430  8.00  0.00           N  
ATOM   1407  C2   DG A  44      -6.621 -16.996 -36.960  5.00  0.00           C  
ATOM   1408  N2   DG A  44      -7.303 -15.894 -37.220  0.00  0.00           N  
ATOM   1409  N3   DG A  44      -7.232 -18.138 -37.090  7.00  0.00           N  
ATOM   1410  C4   DG A  44      -6.484 -19.233 -36.760  8.00  0.00           C  
ATOM   1411  C5   DG A  44      -5.127 -19.245 -36.470  3.00  0.00           C  
ATOM   1412  C6   DG A  44      -4.469 -17.921 -36.300  2.00  0.00           C  
ATOM   1413  O6   DG A  44      -3.272 -17.622 -36.110  8.00  0.00           O  
ATOM   1414  N7   DG A  44      -4.560 -20.484 -36.310  2.00  0.00           N  
ATOM   1415  C8   DG A  44      -5.568 -21.282 -36.540  1.00  0.00           C  
ATOM   1416  N9   DG A  44      -6.767 -20.589 -36.820  2.00  0.00           N  
ATOM   1417  OP1  DG A  44      -8.971 -27.604 -37.510  1.00  0.00           O  
ATOM   1418  OP2  DG A  44      -6.493 -27.212 -37.540  2.00  0.00           O1-
ATOM   1419  H1   DG A  44      -5.009 -15.912 -36.400  2.00  0.00           H  
ATOM   1420  H8   DG A  44      -5.589 -22.308 -36.240  6.00  0.00           H  
ATOM   1421  H1'  DG A  44      -8.771 -20.464 -37.270  2.00  0.00           H  
ATOM   1422  H2'  DG A  44      -6.723 -21.670 -39.060  7.00  0.00           H  
ATOM   1423  H21  DG A  44      -6.942 -14.930 -36.950  3.00  0.00           H  
ATOM   1424  H3'  DG A  44      -7.984 -23.501 -39.460  4.00  0.00           H  
ATOM   1425  H22  DG A  44      -8.243 -16.014 -37.630  6.00  0.00           H  
ATOM   1426  H4'  DG A  44     -10.172 -22.642 -37.780  9.00  0.00           H  
ATOM   1427  H5'  DG A  44      -9.482 -24.524 -36.080  4.00  0.00           H  
ATOM   1428 H2''  DG A  44      -8.114 -20.585 -39.420  7.00  0.00           H  
ATOM   1429 H5''  DG A  44     -10.090 -25.114 -37.700  1.00  0.00           H  
ATOM   1430  P   DG3 A  45      -9.399 -22.099 -41.630  4.00  0.00           P  
ATOM   1431  C5' DG3 A  45     -10.389 -19.751 -41.090  4.00  0.00           C  
ATOM   1432  O5' DG3 A  45      -9.279 -20.482 -41.450  7.00  0.00           O  
ATOM   1433  C4' DG3 A  45     -10.312 -18.172 -41.330  7.00  0.00           C  
ATOM   1434  O4' DG3 A  45      -9.243 -17.721 -40.500  5.00  0.00           O  
ATOM   1435  C3' DG3 A  45     -10.003 -17.742 -42.770  4.00  0.00           C  
ATOM   1436  O3' DG3 A  45     -10.809 -16.631 -43.140  4.00  0.00           O  
ATOM   1437  C2' DG3 A  45      -8.528 -17.505 -42.750  0.00  0.00           C  
ATOM   1438  C1' DG3 A  45      -8.277 -17.062 -41.270  6.00  0.00           C  
ATOM   1439  N1  DG3 A  45      -3.756 -15.318 -39.440  7.00  0.00           N  
ATOM   1440  C2  DG3 A  45      -4.832 -14.625 -39.890  3.00  0.00           C  
ATOM   1441  N2  DG3 A  45      -4.707 -13.293 -39.820  5.00  0.00           N  
ATOM   1442  N3  DG3 A  45      -5.980 -15.168 -40.270  4.00  0.00           N  
ATOM   1443  C4  DG3 A  45      -5.961 -16.533 -40.290  0.00  0.00           C  
ATOM   1444  C5  DG3 A  45      -4.874 -17.315 -39.960  4.00  0.00           C  
ATOM   1445  C6  DG3 A  45      -3.649 -16.681 -39.550  7.00  0.00           C  
ATOM   1446  O6  DG3 A  45      -2.536 -17.188 -39.280  5.00  0.00           O  
ATOM   1447  N7  DG3 A  45      -5.228 -18.634 -40.190  5.00  0.00           N  
ATOM   1448  C8  DG3 A  45      -6.423 -18.598 -40.620  9.00  0.00           C  
ATOM   1449  N9  DG3 A  45      -7.000 -17.357 -40.710  4.00  0.00           N  
ATOM   1450  OP1 DG3 A  45     -10.690 -22.342 -42.360  8.00  0.00           O  
ATOM   1451  OP2 DG3 A  45      -8.083 -22.722 -41.990  4.00  0.00           O  
ATOM   1452 HO3' DG3 A  45     -10.305 -16.060 -43.750  3.00  0.00           H  
ATOM   1453  H1  DG3 A  45      -2.902 -14.767 -39.130  6.00  0.00           H  
ATOM   1454  H8  DG3 A  45      -6.942 -19.458 -40.920  4.00  0.00           H  
ATOM   1455  H1' DG3 A  45      -8.442 -15.969 -41.210  2.00  0.00           H  
ATOM   1456  H2' DG3 A  45      -8.057 -18.427 -43.040  3.00  0.00           H  
ATOM   1457  H21 DG3 A  45      -3.873 -12.966 -39.370  5.00  0.00           H  
ATOM   1458  H3' DG3 A  45     -10.238 -18.692 -43.310  6.00  0.00           H  
ATOM   1459  H22 DG3 A  45      -5.590 -12.811 -39.670  6.00  0.00           H  
ATOM   1460  H4' DG3 A  45     -11.224 -17.711 -40.880  2.00  0.00           H  
ATOM   1461  H5' DG3 A  45     -10.728 -19.964 -40.020  6.00  0.00           H  
ATOM   1462 H2'' DG3 A  45      -8.237 -16.710 -43.400  6.00  0.00           H  
ATOM   1463 H5'' DG3 A  45     -11.250 -20.128 -41.640  0.00  0.00           H  
ATOM   1464  C5' DC5 A  46       2.802  -8.365 -37.900  4.00  0.00           C  
ATOM   1465  O5' DC5 A  46       3.480  -9.524 -37.440  1.00  0.00           O  
ATOM   1466  C4' DC5 A  46       1.337  -8.556 -38.190  5.00  0.00           C  
ATOM   1467  O4' DC5 A  46       1.103  -9.606 -39.120  1.00  0.00           O  
ATOM   1468  C3' DC5 A  46       0.354  -8.716 -36.950  7.00  0.00           C  
ATOM   1469  O3' DC5 A  46      -0.585  -7.639 -36.960  6.00  0.00           O  
ATOM   1470  C2' DC5 A  46      -0.266 -10.084 -37.190  4.00  0.00           C  
ATOM   1471  C1' DC5 A  46      -0.102 -10.301 -38.700  4.00  0.00           C  
ATOM   1472  N1  DC5 A  46       0.019 -11.773 -38.840  7.00  0.00           N  
ATOM   1473  C2  DC5 A  46      -1.133 -12.565 -38.990  3.00  0.00           C  
ATOM   1474  O2  DC5 A  46      -2.219 -12.052 -38.940  2.00  0.00           O  
ATOM   1475  N3  DC5 A  46      -1.074 -13.920 -39.190  8.00  0.00           N  
ATOM   1476  C4  DC5 A  46       0.097 -14.547 -39.120  7.00  0.00           C  
ATOM   1477  N4  DC5 A  46       0.014 -15.820 -39.490  0.00  0.00           N  
ATOM   1478  C5  DC5 A  46       1.308 -13.803 -38.780  8.00  0.00           C  
ATOM   1479  C6  DC5 A  46       1.259 -12.390 -38.750  0.00  0.00           C  
ATOM   1480 HO5' DC5 A  46       3.053 -10.000 -36.670  1.00  0.00           H  
ATOM   1481  H5  DC5 A  46       2.261 -14.266 -38.730  8.00  0.00           H  
ATOM   1482  H6  DC5 A  46       2.138 -11.735 -38.700  9.00  0.00           H  
ATOM   1483  H1' DC5 A  46      -0.936  -9.877 -39.320  0.00  0.00           H  
ATOM   1484  H2' DC5 A  46       0.342 -10.838 -36.730  8.00  0.00           H  
ATOM   1485  H3' DC5 A  46       0.904  -8.828 -35.990  0.00  0.00           H  
ATOM   1486  H4' DC5 A  46       0.992  -7.628 -38.650  9.00  0.00           H  
ATOM   1487  H41 DC5 A  46      -0.989 -16.180 -39.580  8.00  0.00           H  
ATOM   1488  H5' DC5 A  46       3.305  -7.958 -38.810  2.00  0.00           H  
ATOM   1489  H42 DC5 A  46       0.840 -16.325 -39.650  8.00  0.00           H  
ATOM   1490 H2'' DC5 A  46      -1.292 -10.147 -36.930  9.00  0.00           H  
ATOM   1491 H5'' DC5 A  46       2.928  -7.722 -37.080  9.00  0.00           H  
ATOM   1492  P    DC A  47      -1.511  -7.311 -35.720  9.00  0.00           P  
ATOM   1493  C5'  DC A  47      -3.945  -7.706 -36.820  9.00  0.00           C  
ATOM   1494  O5'  DC A  47      -2.899  -8.129 -35.920  6.00  0.00           O  
ATOM   1495  C4'  DC A  47      -5.135  -8.665 -36.610  9.00  0.00           C  
ATOM   1496  O4'  DC A  47      -4.670  -9.993 -36.840  0.00  0.00           O  
ATOM   1497  C3'  DC A  47      -5.845  -8.594 -35.270  4.00  0.00           C  
ATOM   1498  O3'  DC A  47      -7.251  -8.687 -35.490  7.00  0.00           O  
ATOM   1499  C2'  DC A  47      -5.323  -9.871 -34.620  8.00  0.00           C  
ATOM   1500  C1'  DC A  47      -5.260 -10.824 -35.850  4.00  0.00           C  
ATOM   1501  N1   DC A  47      -4.315 -11.922 -35.780  3.00  0.00           N  
ATOM   1502  C2   DC A  47      -4.625 -13.192 -36.270  4.00  0.00           C  
ATOM   1503  O2   DC A  47      -5.743 -13.419 -36.730  6.00  0.00           O  
ATOM   1504  N3   DC A  47      -3.758 -14.274 -36.250  1.00  0.00           N  
ATOM   1505  C4   DC A  47      -2.509 -14.006 -35.920  1.00  0.00           C  
ATOM   1506  N4   DC A  47      -1.711 -15.014 -35.820  9.00  0.00           N  
ATOM   1507  C5   DC A  47      -2.122 -12.726 -35.510  5.00  0.00           C  
ATOM   1508  C6   DC A  47      -3.026 -11.676 -35.390  2.00  0.00           C  
ATOM   1509  OP1  DC A  47      -1.833  -5.862 -35.680  2.00  0.00           O  
ATOM   1510  OP2  DC A  47      -0.933  -7.978 -34.520  8.00  0.00           O1-
ATOM   1511  H5   DC A  47      -1.079 -12.576 -35.140  3.00  0.00           H  
ATOM   1512  H6   DC A  47      -2.712 -10.663 -35.050  4.00  0.00           H  
ATOM   1513  H1'  DC A  47      -6.232 -11.132 -36.060  6.00  0.00           H  
ATOM   1514  H2'  DC A  47      -4.354  -9.616 -34.160  2.00  0.00           H  
ATOM   1515  H3'  DC A  47      -5.504  -7.648 -34.840  9.00  0.00           H  
ATOM   1516  H4'  DC A  47      -5.834  -8.430 -37.380  7.00  0.00           H  
ATOM   1517  H41  DC A  47      -2.230 -15.937 -36.070  3.00  0.00           H  
ATOM   1518  H5'  DC A  47      -3.689  -7.694 -37.870  7.00  0.00           H  
ATOM   1519  H42  DC A  47      -0.687 -14.943 -35.850  2.00  0.00           H  
ATOM   1520 H2''  DC A  47      -6.035 -10.293 -33.810  9.00  0.00           H  
ATOM   1521 H5''  DC A  47      -4.207  -6.735 -36.580  1.00  0.00           H  
ATOM   1522  P    DC A  48      -8.319  -8.790 -34.300  2.00  0.00           P  
ATOM   1523  C5'  DC A  48      -9.248 -10.767 -35.750  3.00  0.00           C  
ATOM   1524  O5'  DC A  48      -8.774 -10.320 -34.480  7.00  0.00           O  
ATOM   1525  C4'  DC A  48      -9.849 -12.220 -35.690  4.00  0.00           C  
ATOM   1526  O4'  DC A  48      -8.798 -13.139 -35.710  5.00  0.00           O  
ATOM   1527  C3'  DC A  48     -10.701 -12.424 -34.450  7.00  0.00           C  
ATOM   1528  O3'  DC A  48     -11.889 -13.095 -34.860  0.00  0.00           O  
ATOM   1529  C2'  DC A  48      -9.816 -13.312 -33.570  4.00  0.00           C  
ATOM   1530  C1'  DC A  48      -9.035 -14.031 -34.640  0.00  0.00           C  
ATOM   1531  N1   DC A  48      -7.852 -14.648 -34.050  5.00  0.00           N  
ATOM   1532  C2   DC A  48      -7.709 -16.017 -33.920  2.00  0.00           C  
ATOM   1533  O2   DC A  48      -8.577 -16.810 -34.300  5.00  0.00           O  
ATOM   1534  N3   DC A  48      -6.609 -16.579 -33.330  4.00  0.00           N  
ATOM   1535  C4   DC A  48      -5.571 -15.748 -33.160  9.00  0.00           C  
ATOM   1536  N4   DC A  48      -4.444 -16.249 -32.680  0.00  0.00           N  
ATOM   1537  C5   DC A  48      -5.689 -14.326 -33.240  1.00  0.00           C  
ATOM   1538  C6   DC A  48      -6.858 -13.827 -33.660  8.00  0.00           C  
ATOM   1539  OP1  DC A  48      -9.472  -7.945 -34.680  4.00  0.00           O  
ATOM   1540  OP2  DC A  48      -7.694  -8.669 -32.970  4.00  0.00           O1-
ATOM   1541  H5   DC A  48      -4.869 -13.618 -33.010  3.00  0.00           H  
ATOM   1542  H6   DC A  48      -6.970 -12.719 -33.680  9.00  0.00           H  
ATOM   1543  H1'  DC A  48      -9.701 -14.842 -34.980  1.00  0.00           H  
ATOM   1544  H2'  DC A  48      -9.188 -12.629 -33.040  7.00  0.00           H  
ATOM   1545  H3'  DC A  48     -10.927 -11.444 -34.020  6.00  0.00           H  
ATOM   1546  H4'  DC A  48     -10.432 -12.467 -36.480  6.00  0.00           H  
ATOM   1547  H41  DC A  48      -4.382 -17.264 -32.560  5.00  0.00           H  
ATOM   1548  H5'  DC A  48      -8.389 -10.860 -36.440  2.00  0.00           H  
ATOM   1549  H42  DC A  48      -3.732 -15.550 -32.340  8.00  0.00           H  
ATOM   1550 H2''  DC A  48     -10.417 -13.974 -32.940  4.00  0.00           H  
ATOM   1551 H5''  DC A  48     -10.031 -10.157 -36.100  4.00  0.00           H  
ATOM   1552  P    DT A  49     -13.198 -13.244 -33.960  4.00  0.00           P  
ATOM   1553  C5'  DT A  49     -13.521 -15.941 -34.060  8.00  0.00           C  
ATOM   1554  O5'  DT A  49     -13.062 -14.737 -33.390  8.00  0.00           O  
ATOM   1555  C4'  DT A  49     -13.347 -17.109 -33.090  9.00  0.00           C  
ATOM   1556  O4'  DT A  49     -11.960 -17.229 -32.680  3.00  0.00           O  
ATOM   1557  C3'  DT A  49     -14.194 -17.082 -31.770  2.00  0.00           C  
ATOM   1558  O3'  DT A  49     -14.936 -18.296 -31.740  1.00  0.00           O  
ATOM   1559  C2'  DT A  49     -13.144 -16.971 -30.700  9.00  0.00           C  
ATOM   1560  C1'  DT A  49     -11.873 -17.638 -31.320  8.00  0.00           C  
ATOM   1561  N1   DT A  49     -10.572 -17.302 -30.860  0.00  0.00           N  
ATOM   1562  C2   DT A  49      -9.631 -18.337 -30.720  7.00  0.00           C  
ATOM   1563  O2   DT A  49      -9.890 -19.518 -30.890  7.00  0.00           O  
ATOM   1564  N3   DT A  49      -8.384 -17.965 -30.450  3.00  0.00           N  
ATOM   1565  C4   DT A  49      -7.891 -16.712 -30.240  7.00  0.00           C  
ATOM   1566  O4   DT A  49      -6.676 -16.533 -29.900  6.00  0.00           O  
ATOM   1567  C5   DT A  49      -8.900 -15.624 -30.420  8.00  0.00           C  
ATOM   1568  C6   DT A  49     -10.182 -15.934 -30.740  4.00  0.00           C  
ATOM   1569  C7   DT A  49      -8.602 -14.142 -30.260  0.00  0.00           C  
ATOM   1570  OP1  DT A  49     -14.380 -13.135 -34.890  4.00  0.00           O  
ATOM   1571  OP2  DT A  49     -13.088 -12.259 -32.880  2.00  0.00           O1-
ATOM   1572  H3   DT A  49      -7.809 -18.806 -30.260  0.00  0.00           H  
ATOM   1573  H6   DT A  49     -10.881 -15.115 -30.940  7.00  0.00           H  
ATOM   1574  H1'  DT A  49     -12.010 -18.737 -31.260  1.00  0.00           H  
ATOM   1575  H2'  DT A  49     -13.152 -15.862 -30.510  7.00  0.00           H  
ATOM   1576  H3'  DT A  49     -14.925 -16.258 -31.850  3.00  0.00           H  
ATOM   1577  H4'  DT A  49     -13.678 -18.008 -33.590  0.00  0.00           H  
ATOM   1578  H5'  DT A  49     -12.979 -15.982 -35.020  6.00  0.00           H  
ATOM   1579  H71  DT A  49      -7.734 -13.847 -30.840  0.00  0.00           H  
ATOM   1580  H72  DT A  49      -9.391 -13.436 -30.570  4.00  0.00           H  
ATOM   1581  H73  DT A  49      -8.463 -13.873 -29.180  6.00  0.00           H  
ATOM   1582 H2''  DT A  49     -13.440 -17.493 -29.740  2.00  0.00           H  
ATOM   1583 H5''  DT A  49     -14.622 -16.003 -34.270  9.00  0.00           H  
ATOM   1584  P    DA A  50     -16.146 -18.560 -30.630  5.00  0.00           P  
ATOM   1585  C5'  DA A  50     -14.979 -20.585 -29.510  5.00  0.00           C  
ATOM   1586  O5'  DA A  50     -15.515 -19.295 -29.410  9.00  0.00           O  
ATOM   1587  C4'  DA A  50     -14.121 -20.831 -28.280  2.00  0.00           C  
ATOM   1588  O4'  DA A  50     -12.905 -20.051 -28.500  3.00  0.00           O  
ATOM   1589  C3'  DA A  50     -14.780 -20.401 -26.940  9.00  0.00           C  
ATOM   1590  O3'  DA A  50     -14.487 -21.385 -26.000  4.00  0.00           O  
ATOM   1591  C2'  DA A  50     -13.882 -19.226 -26.670  3.00  0.00           C  
ATOM   1592  C1'  DA A  50     -12.538 -19.636 -27.160  1.00  0.00           C  
ATOM   1593  N1   DA A  50      -7.548 -18.857 -26.940  1.00  0.00           N  
ATOM   1594  C2   DA A  50      -8.283 -19.974 -26.910  5.00  0.00           C  
ATOM   1595  N3   DA A  50      -9.600 -20.054 -27.010  4.00  0.00           N  
ATOM   1596  C4   DA A  50     -10.167 -18.827 -27.040  2.00  0.00           C  
ATOM   1597  C5   DA A  50      -9.582 -17.613 -27.100  5.00  0.00           C  
ATOM   1598  C6   DA A  50      -8.139 -17.655 -26.990  3.00  0.00           C  
ATOM   1599  N6   DA A  50      -7.284 -16.612 -26.830  9.00  0.00           N  
ATOM   1600  N7   DA A  50     -10.618 -16.613 -27.100  9.00  0.00           N  
ATOM   1601  C8   DA A  50     -11.662 -17.275 -27.280  7.00  0.00           C  
ATOM   1602  N9   DA A  50     -11.500 -18.618 -27.170  2.00  0.00           N  
ATOM   1603  OP1  DA A  50     -17.038 -19.580 -31.230  7.00  0.00           O  
ATOM   1604  OP2  DA A  50     -16.729 -17.215 -30.260  6.00  0.00           O1-
ATOM   1605  H2   DA A  50      -7.694 -20.842 -26.700  2.00  0.00           H  
ATOM   1606  H8   DA A  50     -12.654 -16.837 -27.480  5.00  0.00           H  
ATOM   1607  H1'  DA A  50     -12.099 -20.501 -26.640  5.00  0.00           H  
ATOM   1608  H2'  DA A  50     -14.199 -18.370 -27.190  5.00  0.00           H  
ATOM   1609  H3'  DA A  50     -15.783 -19.978 -26.970  0.00  0.00           H  
ATOM   1610  H4'  DA A  50     -13.868 -21.880 -28.330  9.00  0.00           H  
ATOM   1611  H5'  DA A  50     -14.414 -20.823 -30.360  4.00  0.00           H  
ATOM   1612  H61  DA A  50      -6.317 -16.873 -26.790  8.00  0.00           H  
ATOM   1613  H62  DA A  50      -7.717 -15.687 -26.700  8.00  0.00           H  
ATOM   1614 H2''  DA A  50     -13.959 -18.960 -25.610  8.00  0.00           H  
ATOM   1615 H5''  DA A  50     -15.824 -21.212 -29.440  6.00  0.00           H  
ATOM   1616  P    DA A  51     -15.648 -22.003 -25.130  0.00  0.00           P  
ATOM   1617  C5'  DA A  51     -14.529 -24.420 -25.010  0.00  0.00           C  
ATOM   1618  O5'  DA A  51     -14.960 -23.207 -24.370  2.00  0.00           O  
ATOM   1619  C4'  DA A  51     -13.122 -24.858 -24.480  7.00  0.00           C  
ATOM   1620  O4'  DA A  51     -12.238 -23.921 -25.000  7.00  0.00           O  
ATOM   1621  C3'  DA A  51     -12.899 -25.001 -22.950  2.00  0.00           C  
ATOM   1622  O3'  DA A  51     -12.423 -26.255 -22.490  2.00  0.00           O  
ATOM   1623  C2'  DA A  51     -12.144 -23.721 -22.670  9.00  0.00           C  
ATOM   1624  C1'  DA A  51     -11.456 -23.375 -23.950  8.00  0.00           C  
ATOM   1625  N1   DA A  51      -8.069 -19.546 -23.610  7.00  0.00           N  
ATOM   1626  C2   DA A  51      -7.956 -20.841 -23.820  2.00  0.00           C  
ATOM   1627  N3   DA A  51      -8.860 -21.745 -23.990  9.00  0.00           N  
ATOM   1628  C4   DA A  51     -10.098 -21.189 -24.020  5.00  0.00           C  
ATOM   1629  C5   DA A  51     -10.397 -19.861 -23.880  9.00  0.00           C  
ATOM   1630  C6   DA A  51      -9.278 -19.011 -23.810  7.00  0.00           C  
ATOM   1631  N6   DA A  51      -9.289 -17.707 -23.530  9.00  0.00           N  
ATOM   1632  N7   DA A  51     -11.801 -19.655 -23.800  4.00  0.00           N  
ATOM   1633  C8   DA A  51     -12.245 -20.883 -23.910  4.00  0.00           C  
ATOM   1634  N9   DA A  51     -11.289 -21.882 -24.000  5.00  0.00           N  
ATOM   1635  OP1  DA A  51     -16.740 -22.514 -25.990  2.00  0.00           O  
ATOM   1636  OP2  DA A  51     -15.943 -20.925 -24.180  0.00  0.00           O1-
ATOM   1637  H2   DA A  51      -6.984 -21.249 -23.750  2.00  0.00           H  
ATOM   1638  H8   DA A  51     -13.303 -21.101 -23.670  5.00  0.00           H  
ATOM   1639  H1'  DA A  51     -10.447 -23.816 -24.010  1.00  0.00           H  
ATOM   1640  H2'  DA A  51     -12.904 -22.998 -22.440  9.00  0.00           H  
ATOM   1641  H3'  DA A  51     -13.965 -24.927 -22.530  2.00  0.00           H  
ATOM   1642  H4'  DA A  51     -12.989 -25.770 -25.010  2.00  0.00           H  
ATOM   1643  H5'  DA A  51     -14.415 -24.100 -26.030  3.00  0.00           H  
ATOM   1644  H61  DA A  51      -8.346 -17.320 -23.450  0.00  0.00           H  
ATOM   1645  H62  DA A  51     -10.037 -17.109 -23.660  3.00  0.00           H  
ATOM   1646 H2''  DA A  51     -11.556 -23.893 -21.820  3.00  0.00           H  
ATOM   1647 H5''  DA A  51     -15.288 -25.164 -24.900  6.00  0.00           H  
ATOM   1648  P    DC A  52     -12.407 -26.616 -20.930  1.00  0.00           P  
ATOM   1649  C5'  DC A  52      -9.786 -26.200 -20.920  9.00  0.00           C  
ATOM   1650  O5'  DC A  52     -11.080 -25.972 -20.390  2.00  0.00           O  
ATOM   1651  C4'  DC A  52      -8.610 -25.284 -20.380  1.00  0.00           C  
ATOM   1652  O4'  DC A  52      -8.651 -23.932 -20.920  2.00  0.00           O  
ATOM   1653  C3'  DC A  52      -8.415 -25.238 -18.830  8.00  0.00           C  
ATOM   1654  O3'  DC A  52      -7.055 -25.532 -18.630  1.00  0.00           O  
ATOM   1655  C2'  DC A  52      -8.668 -23.736 -18.520  6.00  0.00           C  
ATOM   1656  C1'  DC A  52      -8.190 -23.056 -19.840  1.00  0.00           C  
ATOM   1657  N1   DC A  52      -8.930 -21.712 -20.040  0.00  0.00           N  
ATOM   1658  C2   DC A  52      -8.106 -20.531 -20.040  8.00  0.00           C  
ATOM   1659  O2   DC A  52      -6.911 -20.508 -19.960  8.00  0.00           O  
ATOM   1660  N3   DC A  52      -8.664 -19.290 -20.130  9.00  0.00           N  
ATOM   1661  C4   DC A  52      -9.897 -19.225 -20.470  1.00  0.00           C  
ATOM   1662  N4   DC A  52     -10.474 -18.076 -20.530  2.00  0.00           N  
ATOM   1663  C5   DC A  52     -10.732 -20.329 -20.640  7.00  0.00           C  
ATOM   1664  C6   DC A  52     -10.230 -21.569 -20.450  2.00  0.00           C  
ATOM   1665  OP1  DC A  52     -12.454 -28.133 -20.790  9.00  0.00           O  
ATOM   1666  OP2  DC A  52     -13.494 -25.848 -20.310  6.00  0.00           O1-
ATOM   1667  H5   DC A  52     -11.856 -20.329 -20.810  5.00  0.00           H  
ATOM   1668  H6   DC A  52     -10.906 -22.482 -20.450  8.00  0.00           H  
ATOM   1669  H1'  DC A  52      -7.089 -22.907 -19.780  3.00  0.00           H  
ATOM   1670  H2'  DC A  52      -9.751 -23.679 -18.480  7.00  0.00           H  
ATOM   1671  H3'  DC A  52      -9.104 -25.885 -18.260  2.00  0.00           H  
ATOM   1672  H4'  DC A  52      -7.656 -25.725 -20.780  6.00  0.00           H  
ATOM   1673  H41  DC A  52      -9.882 -17.337 -20.350  4.00  0.00           H  
ATOM   1674  H5'  DC A  52      -9.804 -26.036 -21.970  5.00  0.00           H  
ATOM   1675  H42  DC A  52     -11.392 -18.082 -21.000  2.00  0.00           H  
ATOM   1676 H2''  DC A  52      -8.133 -23.420 -17.650  3.00  0.00           H  
ATOM   1677 H5''  DC A  52      -9.548 -27.231 -20.700  5.00  0.00           H  
ATOM   1678  P    DC A  53      -6.410 -25.798 -17.220  1.00  0.00           P  
ATOM   1679  C5'  DC A  53      -4.992 -23.563 -16.780  3.00  0.00           C  
ATOM   1680  O5'  DC A  53      -6.172 -24.382 -16.580  9.00  0.00           O  
ATOM   1681  C4'  DC A  53      -5.046 -22.150 -16.120  2.00  0.00           C  
ATOM   1682  O4'  DC A  53      -5.936 -21.346 -16.870  9.00  0.00           O  
ATOM   1683  C3'  DC A  53      -5.442 -22.040 -14.640  2.00  0.00           C  
ATOM   1684  O3'  DC A  53      -4.417 -21.857 -13.720  3.00  0.00           O  
ATOM   1685  C2'  DC A  53      -6.426 -20.827 -14.650  3.00  0.00           C  
ATOM   1686  C1'  DC A  53      -6.265 -20.314 -16.000  3.00  0.00           C  
ATOM   1687  N1   DC A  53      -7.437 -19.494 -16.420  0.00  0.00           N  
ATOM   1688  C2   DC A  53      -7.301 -18.082 -16.460  2.00  0.00           C  
ATOM   1689  O2   DC A  53      -6.163 -17.454 -16.220  1.00  0.00           O  
ATOM   1690  N3   DC A  53      -8.324 -17.302 -16.790  4.00  0.00           N  
ATOM   1691  C4   DC A  53      -9.440 -17.808 -17.240  9.00  0.00           C  
ATOM   1692  N4   DC A  53     -10.313 -16.982 -17.690  6.00  0.00           N  
ATOM   1693  C5   DC A  53      -9.688 -19.205 -17.120  0.00  0.00           C  
ATOM   1694  C6   DC A  53      -8.664 -20.076 -16.740  1.00  0.00           C  
ATOM   1695  OP1  DC A  53      -5.098 -26.318 -17.350  9.00  0.00           O  
ATOM   1696  OP2  DC A  53      -7.355 -26.552 -16.390  2.00  0.00           O1-
ATOM   1697  H5   DC A  53     -10.637 -19.697 -17.420  8.00  0.00           H  
ATOM   1698  H6   DC A  53      -8.864 -21.173 -16.600  6.00  0.00           H  
ATOM   1699  H1'  DC A  53      -5.434 -19.555 -16.030  9.00  0.00           H  
ATOM   1700  H2'  DC A  53      -7.428 -21.192 -14.460  7.00  0.00           H  
ATOM   1701  H3'  DC A  53      -6.132 -22.876 -14.370  9.00  0.00           H  
ATOM   1702  H4'  DC A  53      -4.041 -21.771 -16.180  3.00  0.00           H  
ATOM   1703  H41  DC A  53      -9.995 -16.013 -17.720  8.00  0.00           H  
ATOM   1704  H5'  DC A  53      -4.811 -23.481 -17.890  6.00  0.00           H  
ATOM   1705  H42  DC A  53     -11.220 -17.375 -18.120  6.00  0.00           H  
ATOM   1706 H2''  DC A  53      -5.981 -20.146 -13.940  1.00  0.00           H  
ATOM   1707 H5''  DC A  53      -4.099 -24.025 -16.410  3.00  0.00           H  
ATOM   1708  P    DC A  54      -4.698 -21.879 -12.090  4.00  0.00           P  
ATOM   1709  C5'  DC A  54      -3.973 -19.416 -11.670  3.00  0.00           C  
ATOM   1710  O5'  DC A  54      -5.021 -20.419 -11.660  2.00  0.00           O  
ATOM   1711  C4'  DC A  54      -4.491 -17.986 -11.390  3.00  0.00           C  
ATOM   1712  O4'  DC A  54      -5.105 -17.298 -12.520  1.00  0.00           O  
ATOM   1713  C3'  DC A  54      -5.580 -18.012 -10.290  1.00  0.00           C  
ATOM   1714  O3'  DC A  54      -4.945 -18.253  -9.020  1.00  0.00           O  
ATOM   1715  C2'  DC A  54      -6.196 -16.662 -10.480  3.00  0.00           C  
ATOM   1716  C1'  DC A  54      -5.905 -16.247 -11.990  1.00  0.00           C  
ATOM   1717  N1   DC A  54      -7.149 -16.108 -12.870  4.00  0.00           N  
ATOM   1718  C2   DC A  54      -7.730 -14.875 -13.050  1.00  0.00           C  
ATOM   1719  O2   DC A  54      -7.261 -13.831 -12.610  3.00  0.00           O  
ATOM   1720  N3   DC A  54      -8.956 -14.681 -13.600  8.00  0.00           N  
ATOM   1721  C4   DC A  54      -9.626 -15.763 -13.900  4.00  0.00           C  
ATOM   1722  N4   DC A  54     -10.729 -15.500 -14.540  0.00  0.00           N  
ATOM   1723  C5   DC A  54      -9.086 -17.044 -13.810  6.00  0.00           C  
ATOM   1724  C6   DC A  54      -7.878 -17.183 -13.140  7.00  0.00           C  
ATOM   1725  OP1  DC A  54      -3.376 -22.146 -11.420  9.00  0.00           O  
ATOM   1726  OP2  DC A  54      -5.802 -22.751 -11.640  0.00  0.00           O1-
ATOM   1727  H5   DC A  54      -9.571 -17.885 -14.100  8.00  0.00           H  
ATOM   1728  H6   DC A  54      -7.470 -18.166 -12.930  3.00  0.00           H  
ATOM   1729  H1'  DC A  54      -5.304 -15.309 -12.020  8.00  0.00           H  
ATOM   1730  H2'  DC A  54      -7.223 -16.692 -10.230  1.00  0.00           H  
ATOM   1731  H3'  DC A  54      -6.219 -18.864 -10.530  9.00  0.00           H  
ATOM   1732  H4'  DC A  54      -3.690 -17.314 -10.990  4.00  0.00           H  
ATOM   1733  H41  DC A  54     -10.884 -14.552 -14.560  4.00  0.00           H  
ATOM   1734  H5'  DC A  54      -3.471 -19.312 -12.680  4.00  0.00           H  
ATOM   1735  H42  DC A  54     -11.223 -16.154 -15.050  0.00  0.00           H  
ATOM   1736 H2''  DC A  54      -5.673 -15.992  -9.740  6.00  0.00           H  
ATOM   1737 H5''  DC A  54      -3.167 -19.743 -10.950  5.00  0.00           H  
ATOM   1738  P    DT A  55      -5.808 -18.107  -7.650  5.00  0.00           P  
ATOM   1739  C5'  DT A  55      -4.540 -15.747  -7.240  6.00  0.00           C  
ATOM   1740  O5'  DT A  55      -5.805 -16.493  -7.430  0.00  0.00           O  
ATOM   1741  C4'  DT A  55      -4.811 -14.255  -7.100  2.00  0.00           C  
ATOM   1742  O4'  DT A  55      -5.485 -13.876  -8.270  1.00  0.00           O  
ATOM   1743  C3'  DT A  55      -5.694 -13.784  -5.880  2.00  0.00           C  
ATOM   1744  O3'  DT A  55      -5.002 -13.477  -4.670  4.00  0.00           O  
ATOM   1745  C2'  DT A  55      -6.375 -12.601  -6.460  9.00  0.00           C  
ATOM   1746  C1'  DT A  55      -6.351 -12.769  -8.020  4.00  0.00           C  
ATOM   1747  N1   DT A  55      -7.778 -13.051  -8.530  6.00  0.00           N  
ATOM   1748  C2   DT A  55      -8.512 -11.972  -9.010  0.00  0.00           C  
ATOM   1749  O2   DT A  55      -8.286 -10.806  -8.600  3.00  0.00           O  
ATOM   1750  N3   DT A  55      -9.569 -12.236  -9.810  3.00  0.00           N  
ATOM   1751  C4   DT A  55     -10.116 -13.508 -10.040  4.00  0.00           C  
ATOM   1752  O4   DT A  55     -11.213 -13.652 -10.580  1.00  0.00           O  
ATOM   1753  C5   DT A  55      -9.343 -14.593  -9.430  3.00  0.00           C  
ATOM   1754  C6   DT A  55      -8.203 -14.319  -8.710  3.00  0.00           C  
ATOM   1755  C7   DT A  55      -9.690 -16.034  -9.740  6.00  0.00           C  
ATOM   1756  OP1  DT A  55      -4.856 -18.686  -6.710  6.00  0.00           O  
ATOM   1757  OP2  DT A  55      -7.180 -18.646  -7.810  2.00  0.00           O1-
ATOM   1758  H3   DT A  55     -10.062 -11.430 -10.090  4.00  0.00           H  
ATOM   1759  H6   DT A  55      -7.485 -15.073  -8.360  2.00  0.00           H  
ATOM   1760  H1'  DT A  55      -5.926 -11.911  -8.490  3.00  0.00           H  
ATOM   1761  H2'  DT A  55      -7.373 -12.598  -6.040  1.00  0.00           H  
ATOM   1762  H3'  DT A  55      -6.448 -14.696  -5.760  3.00  0.00           H  
ATOM   1763  H4'  DT A  55      -3.803 -13.800  -7.080  4.00  0.00           H  
ATOM   1764  H5'  DT A  55      -3.899 -16.046  -8.050  6.00  0.00           H  
ATOM   1765  H71  DT A  55      -9.489 -16.304 -10.810  2.00  0.00           H  
ATOM   1766  H72  DT A  55      -9.255 -16.706  -9.040  5.00  0.00           H  
ATOM   1767  H73  DT A  55     -10.787 -16.112  -9.600  6.00  0.00           H  
ATOM   1768 H2''  DT A  55      -5.895 -11.642  -6.200  4.00  0.00           H  
ATOM   1769 H5''  DT A  55      -4.128 -16.030  -6.240  1.00  0.00           H  
ATOM   1770  P    DA A  56      -5.630 -13.036  -3.360  4.00  0.00           P  
ATOM   1771  C5'  DA A  56      -4.861 -10.459  -3.680  0.00  0.00           C  
ATOM   1772  O5'  DA A  56      -5.875 -11.488  -3.510  9.00  0.00           O  
ATOM   1773  C4'  DA A  56      -5.445  -9.065  -3.960  7.00  0.00           C  
ATOM   1774  O4'  DA A  56      -6.397  -9.118  -5.000  9.00  0.00           O  
ATOM   1775  C3'  DA A  56      -6.063  -8.516  -2.720  4.00  0.00           C  
ATOM   1776  O3'  DA A  56      -5.950  -7.110  -2.760  5.00  0.00           O  
ATOM   1777  C2'  DA A  56      -7.444  -9.032  -2.750  0.00  0.00           C  
ATOM   1778  C1'  DA A  56      -7.674  -8.962  -4.350  2.00  0.00           C  
ATOM   1779  N1   DA A  56     -11.386  -9.564  -7.860  7.00  0.00           N  
ATOM   1780  C2   DA A  56     -10.655  -8.458  -7.610  9.00  0.00           C  
ATOM   1781  N3   DA A  56      -9.791  -8.352  -6.600  2.00  0.00           N  
ATOM   1782  C4   DA A  56      -9.532  -9.565  -5.930  8.00  0.00           C  
ATOM   1783  C5   DA A  56     -10.334 -10.662  -6.000  0.00  0.00           C  
ATOM   1784  C6   DA A  56     -11.270 -10.602  -7.050  3.00  0.00           C  
ATOM   1785  N6   DA A  56     -12.072 -11.659  -7.260  9.00  0.00           N  
ATOM   1786  N7   DA A  56      -9.873 -11.750  -5.270  5.00  0.00           N  
ATOM   1787  C8   DA A  56      -8.945 -11.164  -4.540  3.00  0.00           C  
ATOM   1788  N9   DA A  56      -8.695  -9.843  -4.890  1.00  0.00           N  
ATOM   1789  OP1  DA A  56      -4.534 -13.202  -2.350  3.00  0.00           O  
ATOM   1790  OP2  DA A  56      -6.879 -13.822  -3.170  1.00  0.00           O1-
ATOM   1791  H2   DA A  56     -10.851  -7.625  -8.240  9.00  0.00           H  
ATOM   1792  H8   DA A  56      -8.356 -11.681  -3.790  3.00  0.00           H  
ATOM   1793  H1'  DA A  56      -8.063  -7.988  -4.680  8.00  0.00           H  
ATOM   1794  H2'  DA A  56      -7.456 -10.001  -2.280  1.00  0.00           H  
ATOM   1795  H3'  DA A  56      -5.545  -8.829  -1.840  5.00  0.00           H  
ATOM   1796  H4'  DA A  56      -4.642  -8.335  -4.200  4.00  0.00           H  
ATOM   1797  H5'  DA A  56      -4.105 -10.689  -4.510  7.00  0.00           H  
ATOM   1798  H61  DA A  56     -12.866 -11.549  -7.870  5.00  0.00           H  
ATOM   1799  H62  DA A  56     -11.987 -12.505  -6.770  4.00  0.00           H  
ATOM   1800 H2''  DA A  56      -8.091  -8.390  -2.240  9.00  0.00           H  
ATOM   1801 H5''  DA A  56      -4.139 -10.513  -2.770  8.00  0.00           H  
ATOM   1802  P    DA A  57      -6.076  -6.229  -1.430  5.00  0.00           P  
ATOM   1803  C5'  DA A  57      -7.975  -4.824  -2.430  3.00  0.00           C  
ATOM   1804  O5'  DA A  57      -7.560  -5.854  -1.500  9.00  0.00           O  
ATOM   1805  C4'  DA A  57      -9.527  -4.751  -2.560  2.00  0.00           C  
ATOM   1806  O4'  DA A  57      -9.999  -5.833  -3.330  8.00  0.00           O  
ATOM   1807  C3'  DA A  57     -10.284  -4.900  -1.230  7.00  0.00           C  
ATOM   1808  O3'  DA A  57     -11.109  -3.744  -0.890  4.00  0.00           O  
ATOM   1809  C2'  DA A  57     -11.255  -6.022  -1.380  0.00  0.00           C  
ATOM   1810  C1'  DA A  57     -11.399  -6.042  -2.940  2.00  0.00           C  
ATOM   1811  N1   DA A  57     -15.551  -8.586  -4.780  4.00  0.00           N  
ATOM   1812  C2   DA A  57     -15.298  -7.286  -4.630  9.00  0.00           C  
ATOM   1813  N3   DA A  57     -14.165  -6.698  -4.220  3.00  0.00           N  
ATOM   1814  C4   DA A  57     -13.200  -7.582  -3.820  4.00  0.00           C  
ATOM   1815  C5   DA A  57     -13.300  -8.948  -3.940  3.00  0.00           C  
ATOM   1816  C6   DA A  57     -14.557  -9.354  -4.350  3.00  0.00           C  
ATOM   1817  N6   DA A  57     -14.957 -10.620  -4.410  4.00  0.00           N  
ATOM   1818  N7   DA A  57     -12.026  -9.629  -3.660  1.00  0.00           N  
ATOM   1819  C8   DA A  57     -11.272  -8.583  -3.290  6.00  0.00           C  
ATOM   1820  N9   DA A  57     -11.891  -7.337  -3.400  0.00  0.00           N  
ATOM   1821  OP1  DA A  57      -5.289  -5.047  -1.530  5.00  0.00           O  
ATOM   1822  OP2  DA A  57      -5.802  -7.044  -0.220  2.00  0.00           O1-
ATOM   1823  H2   DA A  57     -15.944  -6.617  -5.140  6.00  0.00           H  
ATOM   1824  H8   DA A  57     -10.283  -8.647  -2.960  2.00  0.00           H  
ATOM   1825  H1'  DA A  57     -11.992  -5.187  -3.210  7.00  0.00           H  
ATOM   1826  H2'  DA A  57     -10.672  -6.904  -1.030  4.00  0.00           H  
ATOM   1827  H3'  DA A  57      -9.531  -5.094  -0.460  8.00  0.00           H  
ATOM   1828  H4'  DA A  57      -9.716  -3.773  -3.090  9.00  0.00           H  
ATOM   1829  H5'  DA A  57      -7.490  -5.147  -3.400  7.00  0.00           H  
ATOM   1830  H61  DA A  57     -15.872 -10.720  -4.830  9.00  0.00           H  
ATOM   1831  H62  DA A  57     -14.261 -11.371  -4.370  3.00  0.00           H  
ATOM   1832 H2''  DA A  57     -12.173  -6.054  -0.790  0.00  0.00           H  
ATOM   1833 H5''  DA A  57      -7.740  -3.879  -1.980  9.00  0.00           H  
ATOM   1834  P   DCP A  58     -11.151  -3.123   0.510  3.00  0.00           P  
ATOM   1835  C5' DCP A  58     -13.210  -4.481   1.530  4.00  0.00           C  
ATOM   1836  O5' DCP A  58     -11.795  -4.251   1.420  4.00  0.00           O  
ATOM   1837  C4' DCP A  58     -13.636  -5.409   2.740  1.00  0.00           C  
ATOM   1838  O4' DCP A  58     -12.932  -6.661   2.700  0.00  0.00           O  
ATOM   1839  C3' DCP A  58     -13.198  -4.685   4.020  8.00  0.00           C  
ATOM   1840  O3' DCP A  58     -14.307  -4.509   4.980  4.00  0.00           O  
ATOM   1841  C2' DCP A  58     -12.143  -5.472   4.550  1.00  0.00           C  
ATOM   1842  C1' DCP A  58     -12.038  -6.794   3.810  4.00  0.00           C  
ATOM   1843  N1  DCP A  58     -10.619  -7.003   3.320  0.00  0.00           N  
ATOM   1844  C2  DCP A  58      -9.714  -7.466   4.280  1.00  0.00           C  
ATOM   1845  O2  DCP A  58      -9.877  -7.544   5.450  2.00  0.00           O  
ATOM   1846  N3  DCP A  58      -8.481  -7.681   3.830  6.00  0.00           N  
ATOM   1847  C4  DCP A  58      -8.102  -7.655   2.550  4.00  0.00           C  
ATOM   1848  N4  DCP A  58      -6.817  -7.646   2.260  1.00  0.00           N  
ATOM   1849  C5  DCP A  58      -9.060  -7.360   1.500  6.00  0.00           C  
ATOM   1850  C6  DCP A  58     -10.278  -7.025   1.940  4.00  0.00           C  
ATOM   1851  OP1 DCP A  58     -12.050  -1.975   0.520  5.00  0.00           O  
ATOM   1852  OP2 DCP A  58      -9.758  -2.994   0.900  7.00  0.00           O  
ATOM   1853  H3  DCP A  58      -7.793  -7.891   4.490  8.00  0.00           H  
ATOM   1854  H5  DCP A  58      -8.740  -7.395   0.450  8.00  0.00           H  
ATOM   1855  H6  DCP A  58     -11.033  -6.704   1.230  3.00  0.00           H  
ATOM   1856  H1' DCP A  58     -12.324  -7.692   4.400  6.00  0.00           H  
ATOM   1857  H2' DCP A  58     -11.189  -4.932   4.450  3.00  0.00           H  
ATOM   1858  H3' DCP A  58     -12.805  -3.695   3.790  9.00  0.00           H  
ATOM   1859  H4' DCP A  58     -14.716  -5.558   2.760  5.00  0.00           H  
ATOM   1860  H41 DCP A  58      -6.186  -7.717   3.050  2.00  0.00           H  
ATOM   1861  H5' DCP A  58     -13.654  -4.979   0.640  1.00  0.00           H  
ATOM   1862  H42 DCP A  58      -6.456  -7.425   1.360  1.00  0.00           H  
ATOM   1863 H2'' DCP A  58     -12.325  -5.511   5.690  0.00  0.00           H  
ATOM   1864 H5'' DCP A  58     -13.716  -3.519   1.750  1.00  0.00           H  
ATOM   1865  P   DCP A  59     -15.397  -3.310   4.830  3.00  0.00           P  
ATOM   1866  C5' DCP A  59     -14.509  -1.993   7.020  9.00  0.00           C  
ATOM   1867  O5' DCP A  59     -14.725  -2.091   5.620  2.00  0.00           O  
ATOM   1868  C4' DCP A  59     -13.356  -1.035   7.190  2.00  0.00           C  
ATOM   1869  O4' DCP A  59     -12.156  -1.491   6.550  3.00  0.00           O  
ATOM   1870  C3' DCP A  59     -13.462   0.447   6.650  7.00  0.00           C  
ATOM   1871  O3' DCP A  59     -14.112   1.126   7.670  3.00  0.00           O  
ATOM   1872  C2' DCP A  59     -11.984   0.910   6.420  1.00  0.00           C  
ATOM   1873  C1' DCP A  59     -11.219  -0.415   6.680  0.00  0.00           C  
ATOM   1874  N1  DCP A  59     -10.077  -0.694   5.690  9.00  0.00           N  
ATOM   1875  C2  DCP A  59      -8.839  -1.104   6.220  2.00  0.00           C  
ATOM   1876  O2  DCP A  59      -8.624  -1.127   7.440  6.00  0.00           O  
ATOM   1877  N3  DCP A  59      -7.787  -1.288   5.370  8.00  0.00           N  
ATOM   1878  C4  DCP A  59      -7.872  -1.017   4.090  3.00  0.00           C  
ATOM   1879  N4  DCP A  59      -6.786  -0.911   3.470  3.00  0.00           N  
ATOM   1880  C5  DCP A  59      -9.117  -0.616   3.530  5.00  0.00           C  
ATOM   1881  C6  DCP A  59     -10.253  -0.582   4.340  0.00  0.00           C  
ATOM   1882  OP1 DCP A  59     -16.693  -3.596   5.450  7.00  0.00           O  
ATOM   1883  OP2 DCP A  59     -15.472  -2.961   3.430  1.00  0.00           O  
ATOM   1884  H3  DCP A  59      -6.937  -1.647   5.850  1.00  0.00           H  
ATOM   1885  H5  DCP A  59      -9.172  -0.293   2.470  8.00  0.00           H  
ATOM   1886  H6  DCP A  59     -11.238  -0.472   3.980  4.00  0.00           H  
ATOM   1887  H1' DCP A  59     -10.727  -0.398   7.620  4.00  0.00           H  
ATOM   1888  H2' DCP A  59     -11.792   1.138   5.390  8.00  0.00           H  
ATOM   1889  H3' DCP A  59     -13.962   0.395   5.710  4.00  0.00           H  
ATOM   1890  H4' DCP A  59     -13.123  -1.039   8.280  7.00  0.00           H  
ATOM   1891  H41 DCP A  59      -5.896  -1.212   3.830  7.00  0.00           H  
ATOM   1892  H5' DCP A  59     -14.373  -3.002   7.490  7.00  0.00           H  
ATOM   1893  H42 DCP A  59      -6.817  -0.725   2.460  7.00  0.00           H  
ATOM   1894 H2'' DCP A  59     -11.746   1.743   7.110  8.00  0.00           H  
ATOM   1895 H5'' DCP A  59     -15.416  -1.558   7.500  6.00  0.00           H  
ATOM   1896  P   DCP A  60     -14.472   2.689   7.430  4.00  0.00           P  
ATOM   1897  C5' DCP A  60     -12.606   3.460   9.240  0.00  0.00           C  
ATOM   1898  O5' DCP A  60     -13.170   3.523   7.920  8.00  0.00           O  
ATOM   1899  C4' DCP A  60     -11.383   4.332   9.460  1.00  0.00           C  
ATOM   1900  O4' DCP A  60     -10.360   3.913   8.540  6.00  0.00           O  
ATOM   1901  C3' DCP A  60     -11.538   5.748   9.010  5.00  0.00           C  
ATOM   1902  O3' DCP A  60     -12.294   6.622   9.790  6.00  0.00           O  
ATOM   1903  C2' DCP A  60     -10.092   6.240   9.070  8.00  0.00           C  
ATOM   1904  C1' DCP A  60      -9.361   4.895   8.750  4.00  0.00           C  
ATOM   1905  N1  DCP A  60      -8.304   5.113   7.720  5.00  0.00           N  
ATOM   1906  C2  DCP A  60      -6.946   4.971   7.990  0.00  0.00           C  
ATOM   1907  O2  DCP A  60      -6.608   4.659   9.140  1.00  0.00           O  
ATOM   1908  N3  DCP A  60      -6.016   5.114   7.060  6.00  0.00           N  
ATOM   1909  C4  DCP A  60      -6.343   5.476   5.820  2.00  0.00           C  
ATOM   1910  N4  DCP A  60      -5.356   5.639   4.950  8.00  0.00           N  
ATOM   1911  C5  DCP A  60      -7.696   5.636   5.470  0.00  0.00           C  
ATOM   1912  C6  DCP A  60      -8.665   5.443   6.430  2.00  0.00           C  
ATOM   1913  OP1 DCP A  60     -15.698   2.953   8.270  1.00  0.00           O  
ATOM   1914  OP2 DCP A  60     -14.518   2.922   5.950  6.00  0.00           O  
ATOM   1915  H3  DCP A  60      -5.055   5.001   7.470  3.00  0.00           H  
ATOM   1916  H5  DCP A  60      -7.870   5.933   4.500  5.00  0.00           H  
ATOM   1917  H6  DCP A  60      -9.744   5.606   6.190  0.00  0.00           H  
ATOM   1918  H1' DCP A  60      -8.888   4.563   9.730  2.00  0.00           H  
ATOM   1919  H2' DCP A  60      -9.833   7.000   8.310  8.00  0.00           H  
ATOM   1920  H3' DCP A  60     -11.856   5.631   8.010  2.00  0.00           H  
ATOM   1921  H4' DCP A  60     -11.022   4.301  10.510  7.00  0.00           H  
ATOM   1922  H41 DCP A  60      -4.426   5.348   5.200  5.00  0.00           H  
ATOM   1923  H5' DCP A  60     -12.246   2.491   9.480  3.00  0.00           H  
ATOM   1924  H42 DCP A  60      -5.521   5.881   4.050  0.00  0.00           H  
ATOM   1925 H2'' DCP A  60      -9.832   6.665  10.110  7.00  0.00           H  
ATOM   1926 H5'' DCP A  60     -13.195   3.601  10.070  2.00  0.00           H  
ATOM   1927  P    DT A  61     -12.858   8.034   9.240  4.00  0.00           P  
ATOM   1928  C5'  DT A  61     -11.888  10.298   8.410  5.00  0.00           C  
ATOM   1929  O5'  DT A  61     -11.699   9.127   9.160  0.00  0.00           O  
ATOM   1930  C4'  DT A  61     -10.967  11.427   8.820  7.00  0.00           C  
ATOM   1931  O4'  DT A  61     -11.122  11.583  10.210  6.00  0.00           O  
ATOM   1932  C3'  DT A  61      -9.550  10.976   8.670  4.00  0.00           C  
ATOM   1933  O3'  DT A  61      -9.185  11.317   7.360  2.00  0.00           O  
ATOM   1934  C2'  DT A  61      -8.937  11.875   9.770  5.00  0.00           C  
ATOM   1935  C1'  DT A  61      -9.925  12.039  10.870  3.00  0.00           C  
ATOM   1936  N1   DT A  61      -9.427  11.228  12.000  5.00  0.00           N  
ATOM   1937  C2   DT A  61      -8.825  11.941  13.060  5.00  0.00           C  
ATOM   1938  O2   DT A  61      -8.683  13.169  13.000  7.00  0.00           O  
ATOM   1939  N3   DT A  61      -8.373  11.236  14.130  2.00  0.00           N  
ATOM   1940  C4   DT A  61      -8.407   9.859  14.170  6.00  0.00           C  
ATOM   1941  O4   DT A  61      -7.804   9.340  15.130  0.00  0.00           O  
ATOM   1942  C5   DT A  61      -9.021   9.188  13.100  2.00  0.00           C  
ATOM   1943  C6   DT A  61      -9.516   9.880  11.980  7.00  0.00           C  
ATOM   1944  C7   DT A  61      -9.150   7.700  13.120  4.00  0.00           C  
ATOM   1945  OP1  DT A  61     -13.821   8.466  10.320  8.00  0.00           O  
ATOM   1946  OP2  DT A  61     -13.408   7.877   7.840  3.00  0.00           O1-
ATOM   1947  H3   DT A  61      -7.701  11.651  14.780  8.00  0.00           H  
ATOM   1948  H6   DT A  61      -9.941   9.302  11.140  5.00  0.00           H  
ATOM   1949  H1'  DT A  61      -9.969  13.072  11.220  5.00  0.00           H  
ATOM   1950  H2'  DT A  61      -7.972  11.467  10.070  2.00  0.00           H  
ATOM   1951  H3'  DT A  61      -9.466   9.893   8.930  9.00  0.00           H  
ATOM   1952  H4'  DT A  61     -11.153  12.312   8.260  7.00  0.00           H  
ATOM   1953  H5'  DT A  61     -12.899  10.667   8.520  7.00  0.00           H  
ATOM   1954  H71  DT A  61      -9.748   7.174  12.380  0.00  0.00           H  
ATOM   1955  H72  DT A  61      -9.474   7.403  14.050  3.00  0.00           H  
ATOM   1956  H73  DT A  61      -8.113   7.353  13.030  4.00  0.00           H  
ATOM   1957 H2''  DT A  61      -8.761  12.904   9.370  6.00  0.00           H  
ATOM   1958 H5''  DT A  61     -11.738  10.095   7.290  1.00  0.00           H  
ATOM   1959  P    DA A  62      -7.753  10.943   6.670  7.00  0.00           P  
ATOM   1960  C5'  DA A  62      -6.803  13.340   7.310  6.00  0.00           C  
ATOM   1961  O5'  DA A  62      -6.682  11.909   7.360  2.00  0.00           O  
ATOM   1962  C4'  DA A  62      -5.742  14.047   8.160  8.00  0.00           C  
ATOM   1963  O4'  DA A  62      -5.755  13.661   9.560  1.00  0.00           O  
ATOM   1964  C3'  DA A  62      -4.315  13.880   7.650  3.00  0.00           C  
ATOM   1965  O3'  DA A  62      -3.574  15.130   7.770  4.00  0.00           O  
ATOM   1966  C2'  DA A  62      -3.708  12.892   8.630  1.00  0.00           C  
ATOM   1967  C1'  DA A  62      -4.417  13.294   9.910  3.00  0.00           C  
ATOM   1968  N1   DA A  62      -3.765  12.225  14.990  6.00  0.00           N  
ATOM   1969  C2   DA A  62      -3.463  13.312  14.260  3.00  0.00           C  
ATOM   1970  N3   DA A  62      -3.631  13.549  13.000  9.00  0.00           N  
ATOM   1971  C4   DA A  62      -4.117  12.422  12.330  4.00  0.00           C  
ATOM   1972  C5   DA A  62      -4.474  11.172  12.900  2.00  0.00           C  
ATOM   1973  C6   DA A  62      -4.264  11.186  14.300  7.00  0.00           C  
ATOM   1974  N6   DA A  62      -4.601  10.205  15.170  7.00  0.00           N  
ATOM   1975  N7   DA A  62      -4.926  10.235  11.880  9.00  0.00           N  
ATOM   1976  C8   DA A  62      -4.906  10.993  10.800  9.00  0.00           C  
ATOM   1977  N9   DA A  62      -4.424  12.262  10.970  6.00  0.00           N  
ATOM   1978  OP1  DA A  62      -7.829  11.264   5.240  6.00  0.00           O  
ATOM   1979  OP2  DA A  62      -7.392   9.598   7.020  4.00  0.00           O1-
ATOM   1980  H2   DA A  62      -3.074  14.172  14.770  2.00  0.00           H  
ATOM   1981  H8   DA A  62      -5.179  10.549   9.880  9.00  0.00           H  
ATOM   1982  H1'  DA A  62      -3.931  14.232  10.210  3.00  0.00           H  
ATOM   1983  H2'  DA A  62      -4.028  11.900   8.350  2.00  0.00           H  
ATOM   1984  H3'  DA A  62      -4.235  13.450   6.690  4.00  0.00           H  
ATOM   1985  H4'  DA A  62      -5.971  15.103   8.160  8.00  0.00           H  
ATOM   1986  H5'  DA A  62      -7.793  13.609   7.650  1.00  0.00           H  
ATOM   1987  H61  DA A  62      -4.165  10.224  16.120  8.00  0.00           H  
ATOM   1988  H62  DA A  62      -4.892   9.327  14.790  6.00  0.00           H  
ATOM   1989 H2''  DA A  62      -2.589  13.035   8.600  9.00  0.00           H  
ATOM   1990 H5''  DA A  62      -6.669  13.728   6.360  7.00  0.00           H  
ATOM   1991  P    DA A  63      -3.083  16.015   6.530  1.00  0.00           P  
ATOM   1992  C5'  DA A  63      -1.484  15.342   4.440  3.00  0.00           C  
ATOM   1993  O5'  DA A  63      -2.309  14.958   5.560  1.00  0.00           O  
ATOM   1994  C4'  DA A  63      -1.097  14.104   3.560  9.00  0.00           C  
ATOM   1995  O4'  DA A  63       0.000  13.306   4.150  6.00  0.00           O  
ATOM   1996  C3'  DA A  63      -2.271  13.146   3.250  3.00  0.00           C  
ATOM   1997  O3'  DA A  63      -2.092  12.701   1.900  4.00  0.00           O  
ATOM   1998  C2'  DA A  63      -2.046  12.059   4.260  9.00  0.00           C  
ATOM   1999  C1'  DA A  63      -0.560  12.024   4.390  5.00  0.00           C  
ATOM   2000  N1   DA A  63       1.694   8.668   7.440  1.00  0.00           N  
ATOM   2001  C2   DA A  63       1.609   8.775   6.150  1.00  0.00           C  
ATOM   2002  N3   DA A  63       0.945   9.719   5.420  8.00  0.00           N  
ATOM   2003  C4   DA A  63       0.387  10.628   6.250  6.00  0.00           C  
ATOM   2004  C5   DA A  63       0.364  10.659   7.580  3.00  0.00           C  
ATOM   2005  C6   DA A  63       1.142   9.613   8.190  1.00  0.00           C  
ATOM   2006  N6   DA A  63       1.270   9.443   9.530  3.00  0.00           N  
ATOM   2007  N7   DA A  63      -0.119  11.854   8.070  8.00  0.00           N  
ATOM   2008  C8   DA A  63      -0.433  12.386   7.010  0.00  0.00           C  
ATOM   2009  N9   DA A  63      -0.167  11.749   5.850  0.00  0.00           N  
ATOM   2010  OP1  DA A  63      -2.049  16.876   7.090  0.00  0.00           O  
ATOM   2011  OP2  DA A  63      -4.205  16.566   5.800  2.00  0.00           O1-
ATOM   2012  H2   DA A  63       2.074   7.974   5.590  2.00  0.00           H  
ATOM   2013  H8   DA A  63      -0.910  13.374   6.930  6.00  0.00           H  
ATOM   2014  H1'  DA A  63      -0.103  11.316   3.680  4.00  0.00           H  
ATOM   2015  H2'  DA A  63      -2.452  12.301   5.230  0.00  0.00           H  
ATOM   2016  H3'  DA A  63      -3.265  13.697   3.480  1.00  0.00           H  
ATOM   2017  H4'  DA A  63      -0.741  14.529   2.620  1.00  0.00           H  
ATOM   2018  H5'  DA A  63      -0.653  15.911   4.660  8.00  0.00           H  
ATOM   2019  H61  DA A  63       1.788   8.681   9.860  9.00  0.00           H  
ATOM   2020  H62  DA A  63       0.606   9.956  10.070  5.00  0.00           H  
ATOM   2021 H2''  DA A  63      -2.386  11.127   3.890  0.00  0.00           H  
ATOM   2022 H5''  DA A  63      -2.089  15.956   3.780  8.00  0.00           H  
ATOM   2023  P   DCP A  64      -3.045  11.673   1.190  6.00  0.00           P  
ATOM   2024  C5' DCP A  64      -1.093   9.814   1.110  1.00  0.00           C  
ATOM   2025  O5' DCP A  64      -2.438  10.208   1.420  1.00  0.00           O  
ATOM   2026  C4' DCP A  64      -0.746   8.461   1.680  5.00  0.00           C  
ATOM   2027  O4' DCP A  64      -0.589   8.700   3.060  2.00  0.00           O  
ATOM   2028  C3' DCP A  64      -1.809   7.294   1.480  2.00  0.00           C  
ATOM   2029  O3' DCP A  64      -1.585   6.634   0.240  8.00  0.00           O  
ATOM   2030  C2' DCP A  64      -1.397   6.476   2.660  3.00  0.00           C  
ATOM   2031  C1' DCP A  64      -1.081   7.534   3.710  0.00  0.00           C  
ATOM   2032  N1  DCP A  64      -2.199   7.851   4.640  7.00  0.00           N  
ATOM   2033  C2  DCP A  64      -2.010   7.544   6.000  1.00  0.00           C  
ATOM   2034  O2  DCP A  64      -1.007   7.026   6.470  8.00  0.00           O  
ATOM   2035  N3  DCP A  64      -2.917   8.016   6.820  8.00  0.00           N  
ATOM   2036  C4  DCP A  64      -3.926   8.750   6.500  5.00  0.00           C  
ATOM   2037  N4  DCP A  64      -4.583   9.278   7.480  2.00  0.00           N  
ATOM   2038  C5  DCP A  64      -4.109   9.159   5.180  0.00  0.00           C  
ATOM   2039  C6  DCP A  64      -3.265   8.618   4.220  6.00  0.00           C  
ATOM   2040  OP1 DCP A  64      -2.904  11.975  -0.250  7.00  0.00           O  
ATOM   2041  OP2 DCP A  64      -4.384  11.792   1.780  0.00  0.00           O  
ATOM   2042  H3  DCP A  64      -2.757   7.942   7.790  7.00  0.00           H  
ATOM   2043  H5  DCP A  64      -4.879   9.832   4.950  2.00  0.00           H  
ATOM   2044  H6  DCP A  64      -3.325   8.780   3.210  1.00  0.00           H  
ATOM   2045  H1' DCP A  64      -0.254   7.173   4.280  8.00  0.00           H  
ATOM   2046  H2' DCP A  64      -2.212   5.808   2.900  2.00  0.00           H  
ATOM   2047  H3' DCP A  64      -2.863   7.707   1.580  8.00  0.00           H  
ATOM   2048  H4' DCP A  64       0.147   8.196   1.190  6.00  0.00           H  
ATOM   2049  H41 DCP A  64      -4.324   9.021   8.380  3.00  0.00           H  
ATOM   2050  H5' DCP A  64      -0.333  10.494   1.480  6.00  0.00           H  
ATOM   2051  H42 DCP A  64      -5.476   9.605   7.300  0.00  0.00           H  
ATOM   2052 H2'' DCP A  64      -0.604   5.787   2.460  6.00  0.00           H  
ATOM   2053 H5'' DCP A  64      -1.057   9.888   0.050  8.00  0.00           H  
ATOM   2054  P   DCP A  65      -2.698   5.755  -0.380  1.00  0.00           P  
ATOM   2055  C5' DCP A  65      -1.233   3.701   0.370  4.00  0.00           C  
ATOM   2056  O5' DCP A  65      -2.534   4.367   0.370  0.00  0.00           O  
ATOM   2057  C4' DCP A  65      -1.104   2.485   1.270  4.00  0.00           C  
ATOM   2058  O4' DCP A  65      -1.596   2.873   2.490  6.00  0.00           O  
ATOM   2059  C3' DCP A  65      -1.719   1.174   0.770  5.00  0.00           C  
ATOM   2060  O3' DCP A  65      -0.869   0.284   0.170  8.00  0.00           O  
ATOM   2061  C2' DCP A  65      -1.986   0.600   2.160  9.00  0.00           C  
ATOM   2062  C1' DCP A  65      -2.107   1.712   3.150  4.00  0.00           C  
ATOM   2063  N1  DCP A  65      -3.549   2.075   3.540  6.00  0.00           N  
ATOM   2064  C2  DCP A  65      -3.950   1.858   4.880  8.00  0.00           C  
ATOM   2065  O2  DCP A  65      -3.171   1.560   5.800  6.00  0.00           O  
ATOM   2066  N3  DCP A  65      -5.244   1.994   5.250  1.00  0.00           N  
ATOM   2067  C4  DCP A  65      -6.164   2.254   4.380  7.00  0.00           C  
ATOM   2068  N4  DCP A  65      -7.372   2.337   4.790  6.00  0.00           N  
ATOM   2069  C5  DCP A  65      -5.776   2.631   3.020  5.00  0.00           C  
ATOM   2070  C6  DCP A  65      -4.482   2.613   2.640  2.00  0.00           C  
ATOM   2071  OP1 DCP A  65      -2.233   5.602  -1.820  4.00  0.00           O  
ATOM   2072  OP2 DCP A  65      -4.104   6.228  -0.090  2.00  0.00           O  
ATOM   2073  H3  DCP A  65      -5.442   1.830   6.270  0.00  0.00           H  
ATOM   2074  H5  DCP A  65      -6.487   2.961   2.350  3.00  0.00           H  
ATOM   2075  H6  DCP A  65      -4.136   2.831   1.620  8.00  0.00           H  
ATOM   2076  H1' DCP A  65      -1.629   1.479   4.130  8.00  0.00           H  
ATOM   2077  H2' DCP A  65      -2.783  -0.119   2.150  6.00  0.00           H  
ATOM   2078  H3' DCP A  65      -2.697   1.342   0.290  6.00  0.00           H  
ATOM   2079  H4' DCP A  65      -0.065   2.363   1.330  1.00  0.00           H  
ATOM   2080  H41 DCP A  65      -7.636   2.174   5.770  8.00  0.00           H  
ATOM   2081  H5' DCP A  65      -0.454   4.423   0.620  7.00  0.00           H  
ATOM   2082  H42 DCP A  65      -8.095   2.481   4.120  5.00  0.00           H  
ATOM   2083 H2'' DCP A  65      -1.137   0.066   2.440  0.00  0.00           H  
ATOM   2084 H5'' DCP A  65      -0.980   3.384  -0.570  1.00  0.00           H  
ATOM   2085  P   DCP A  66      -1.445  -0.992  -0.550  0.00  0.00           P  
ATOM   2086  C5' DCP A  66      -0.725  -2.710   1.360  9.00  0.00           C  
ATOM   2087  O5' DCP A  66      -1.751  -2.048   0.600  6.00  0.00           O  
ATOM   2088  C4' DCP A  66      -1.329  -3.813   2.180  5.00  0.00           C  
ATOM   2089  O4' DCP A  66      -2.681  -3.516   2.680  6.00  0.00           O  
ATOM   2090  C3' DCP A  66      -1.480  -5.035   1.180  9.00  0.00           C  
ATOM   2091  O3' DCP A  66      -0.246  -5.747   1.210  6.00  0.00           O  
ATOM   2092  C2' DCP A  66      -2.694  -5.772   1.850  9.00  0.00           C  
ATOM   2093  C1' DCP A  66      -3.232  -4.744   2.880  3.00  0.00           C  
ATOM   2094  N1  DCP A  66      -4.691  -4.684   2.950  1.00  0.00           N  
ATOM   2095  C2  DCP A  66      -5.354  -4.868   4.140  0.00  0.00           C  
ATOM   2096  O2  DCP A  66      -4.725  -5.159   5.190  2.00  0.00           O  
ATOM   2097  N3  DCP A  66      -6.674  -4.720   4.130  7.00  0.00           N  
ATOM   2098  C4  DCP A  66      -7.306  -4.337   3.110  1.00  0.00           C  
ATOM   2099  N4  DCP A  66      -8.569  -3.981   3.180  2.00  0.00           N  
ATOM   2100  C5  DCP A  66      -6.715  -4.220   1.810  5.00  0.00           C  
ATOM   2101  C6  DCP A  66      -5.335  -4.376   1.760  2.00  0.00           C  
ATOM   2102  OP1 DCP A  66      -0.285  -1.399  -1.390  0.00  0.00           O  
ATOM   2103  OP2 DCP A  66      -2.645  -0.521  -1.270  9.00  0.00           O  
ATOM   2104  H3  DCP A  66      -7.110  -4.811   5.060  4.00  0.00           H  
ATOM   2105  H5  DCP A  66      -7.305  -3.869   0.940  3.00  0.00           H  
ATOM   2106  H6  DCP A  66      -4.724  -4.156   0.860  7.00  0.00           H  
ATOM   2107  H1' DCP A  66      -2.795  -5.041   3.880  4.00  0.00           H  
ATOM   2108  H2' DCP A  66      -3.424  -6.070   1.010  2.00  0.00           H  
ATOM   2109  H3' DCP A  66      -1.735  -4.780   0.210  3.00  0.00           H  
ATOM   2110  H4' DCP A  66      -0.665  -4.133   3.000  1.00  0.00           H  
ATOM   2111  H41 DCP A  66      -9.101  -3.864   4.030  1.00  0.00           H  
ATOM   2112  H5' DCP A  66      -0.207  -1.943   1.940  7.00  0.00           H  
ATOM   2113  H42 DCP A  66      -9.062  -3.666   2.340  6.00  0.00           H  
ATOM   2114 H2'' DCP A  66      -2.427  -6.667   2.510  1.00  0.00           H  
ATOM   2115 H5'' DCP A  66       0.082  -3.150   0.670  1.00  0.00           H  
ATOM   2116  P    DT A  67       0.040  -7.052   0.330  7.00  0.00           P  
ATOM   2117  C5'  DT A  67      -0.075  -8.164   2.620  2.00  0.00           C  
ATOM   2118  O5'  DT A  67      -0.450  -8.234   1.280  1.00  0.00           O  
ATOM   2119  C4'  DT A  67      -0.813  -9.250   3.390  2.00  0.00           C  
ATOM   2120  O4'  DT A  67      -2.216  -9.172   3.330  4.00  0.00           O  
ATOM   2121  C3'  DT A  67      -0.515 -10.736   3.160  1.00  0.00           C  
ATOM   2122  O3'  DT A  67      -0.055 -11.281   4.380  4.00  0.00           O  
ATOM   2123  C2'  DT A  67      -1.717 -11.361   2.640  4.00  0.00           C  
ATOM   2124  C1'  DT A  67      -2.621 -10.536   3.520  9.00  0.00           C  
ATOM   2125  N1   DT A  67      -4.083 -10.710   3.170  2.00  0.00           N  
ATOM   2126  C2   DT A  67      -4.960 -11.095   4.170  0.00  0.00           C  
ATOM   2127  O2   DT A  67      -4.667 -11.113   5.350  0.00  0.00           O  
ATOM   2128  N3   DT A  67      -6.195 -11.481   3.840  2.00  0.00           N  
ATOM   2129  C4   DT A  67      -6.828 -11.429   2.640  6.00  0.00           C  
ATOM   2130  O4   DT A  67      -8.046 -11.573   2.610  1.00  0.00           O  
ATOM   2131  C5   DT A  67      -5.890 -10.923   1.580  3.00  0.00           C  
ATOM   2132  C6   DT A  67      -4.565 -10.634   1.820  5.00  0.00           C  
ATOM   2133  C7   DT A  67      -6.508 -10.734   0.210  7.00  0.00           C  
ATOM   2134  OP1  DT A  67       1.519  -7.270   0.220  2.00  0.00           O  
ATOM   2135  OP2  DT A  67      -0.760  -6.952  -0.880  0.00  0.00           O1-
ATOM   2136  H3   DT A  67      -6.727 -11.905   4.590  8.00  0.00           H  
ATOM   2137  H6   DT A  67      -3.936 -10.310   1.010  6.00  0.00           H  
ATOM   2138  H1'  DT A  67      -2.398 -10.778   4.580  8.00  0.00           H  
ATOM   2139  H2'  DT A  67      -1.949 -11.130   1.500  6.00  0.00           H  
ATOM   2140  H3'  DT A  67       0.262 -10.924   2.420  5.00  0.00           H  
ATOM   2141  H4'  DT A  67      -0.637  -9.150   4.500  2.00  0.00           H  
ATOM   2142  H5'  DT A  67      -0.296  -7.216   3.070  4.00  0.00           H  
ATOM   2143  H71  DT A  67      -7.139 -11.564   0.040  6.00  0.00           H  
ATOM   2144  H72  DT A  67      -5.698 -10.732  -0.530  2.00  0.00           H  
ATOM   2145  H73  DT A  67      -7.102  -9.800   0.270  4.00  0.00           H  
ATOM   2146 H2''  DT A  67      -1.766 -12.373   2.920  4.00  0.00           H  
ATOM   2147 H5''  DT A  67       1.030  -8.170   2.780  4.00  0.00           H  
ATOM   2148  P    DA A  68       0.673 -12.717   4.460  5.00  0.00           P  
ATOM   2149  C5'  DA A  68      -1.080 -13.700   6.120  3.00  0.00           C  
ATOM   2150  O5'  DA A  68      -0.456 -13.752   4.850  3.00  0.00           O  
ATOM   2151  C4'  DA A  68      -2.562 -14.226   6.180  9.00  0.00           C  
ATOM   2152  O4'  DA A  68      -3.325 -13.767   5.090  7.00  0.00           O  
ATOM   2153  C3'  DA A  68      -2.697 -15.729   6.280  9.00  0.00           C  
ATOM   2154  O3'  DA A  68      -3.780 -16.028   7.200  8.00  0.00           O  
ATOM   2155  C2'  DA A  68      -3.142 -16.061   4.880  0.00  0.00           C  
ATOM   2156  C1'  DA A  68      -4.111 -14.851   4.640  3.00  0.00           C  
ATOM   2157  N1   DA A  68      -8.146 -15.021   1.370  8.00  0.00           N  
ATOM   2158  C2   DA A  68      -8.001 -15.321   2.650  5.00  0.00           C  
ATOM   2159  N3   DA A  68      -6.922 -15.163   3.410  9.00  0.00           N  
ATOM   2160  C4   DA A  68      -5.823 -14.918   2.700  1.00  0.00           C  
ATOM   2161  C5   DA A  68      -5.757 -14.584   1.370  9.00  0.00           C  
ATOM   2162  C6   DA A  68      -7.043 -14.616   0.770  6.00  0.00           C  
ATOM   2163  N6   DA A  68      -7.309 -14.307  -0.470  8.00  0.00           N  
ATOM   2164  N7   DA A  68      -4.466 -14.302   0.970  0.00  0.00           N  
ATOM   2165  C8   DA A  68      -3.752 -14.479   2.080  4.00  0.00           C  
ATOM   2166  N9   DA A  68      -4.518 -14.643   3.190  0.00  0.00           N  
ATOM   2167  OP1  DA A  68       1.769 -12.646   5.450  9.00  0.00           O  
ATOM   2168  OP2  DA A  68       1.026 -13.112   3.090  6.00  0.00           O1-
ATOM   2169  H2   DA A  68      -8.946 -15.608   3.190  6.00  0.00           H  
ATOM   2170  H8   DA A  68      -2.712 -14.239   2.220  5.00  0.00           H  
ATOM   2171  H1'  DA A  68      -4.999 -14.970   5.250  0.00  0.00           H  
ATOM   2172  H2'  DA A  68      -2.221 -16.010   4.230  2.00  0.00           H  
ATOM   2173  H3'  DA A  68      -1.750 -16.066   6.630  6.00  0.00           H  
ATOM   2174  H4'  DA A  68      -3.031 -13.825   7.130  7.00  0.00           H  
ATOM   2175  H5'  DA A  68      -1.048 -12.665   6.340  2.00  0.00           H  
ATOM   2176  H61  DA A  68      -8.232 -14.266  -0.750  7.00  0.00           H  
ATOM   2177  H62  DA A  68      -6.588 -14.050  -1.120  8.00  0.00           H  
ATOM   2178 H2''  DA A  68      -3.587 -17.043   4.840  0.00  0.00           H  
ATOM   2179 H5''  DA A  68      -0.454 -14.145   6.890  1.00  0.00           H  
ATOM   2180  P    DA A  69      -3.545 -16.756   8.550  3.00  0.00           P  
ATOM   2181  C5'  DA A  69      -2.980 -15.035  10.410  8.00  0.00           C  
ATOM   2182  O5'  DA A  69      -2.527 -15.956   9.430  5.00  0.00           O  
ATOM   2183  C4'  DA A  69      -1.873 -14.234  11.130  5.00  0.00           C  
ATOM   2184  O4'  DA A  69      -1.081 -15.232  11.680  6.00  0.00           O  
ATOM   2185  C3'  DA A  69      -1.130 -13.313  10.160  5.00  0.00           C  
ATOM   2186  O3'  DA A  69      -0.584 -12.212  10.840  3.00  0.00           O  
ATOM   2187  C2'  DA A  69       0.011 -14.294   9.690  4.00  0.00           C  
ATOM   2188  C1'  DA A  69       0.229 -15.092  10.920  8.00  0.00           C  
ATOM   2189  N1   DA A  69       2.652 -18.963  13.200  7.00  0.00           N  
ATOM   2190  C2   DA A  69       2.413 -17.740  13.480  1.00  0.00           C  
ATOM   2191  N3   DA A  69       2.012 -16.716  12.760  9.00  0.00           N  
ATOM   2192  C4   DA A  69       1.629 -17.131  11.520  8.00  0.00           C  
ATOM   2193  C5   DA A  69       1.732 -18.414  10.980  4.00  0.00           C  
ATOM   2194  C6   DA A  69       2.367 -19.316  11.920  0.00  0.00           C  
ATOM   2195  N6   DA A  69       2.572 -20.612  11.700  1.00  0.00           N  
ATOM   2196  N7   DA A  69       1.228 -18.493   9.680  6.00  0.00           N  
ATOM   2197  C8   DA A  69       0.757 -17.296   9.550  1.00  0.00           C  
ATOM   2198  N9   DA A  69       0.848 -16.432  10.650  4.00  0.00           N  
ATOM   2199  OP1  DA A  69      -2.967 -18.068   8.160  7.00  0.00           O  
ATOM   2200  OP2  DA A  69      -4.862 -16.672   9.270  6.00  0.00           O1-
ATOM   2201  H2   DA A  69       2.624 -17.548  14.500  9.00  0.00           H  
ATOM   2202  H8   DA A  69       0.385 -16.958   8.520  7.00  0.00           H  
ATOM   2203  H1'  DA A  69       0.872 -14.426  11.600  6.00  0.00           H  
ATOM   2204  H2'  DA A  69      -0.437 -14.905   8.940  3.00  0.00           H  
ATOM   2205  H3'  DA A  69      -1.749 -12.999   9.320  8.00  0.00           H  
ATOM   2206  H4'  DA A  69      -2.241 -13.794  11.990  0.00  0.00           H  
ATOM   2207  H5'  DA A  69      -3.653 -15.497  11.140  9.00  0.00           H  
ATOM   2208  H61  DA A  69       2.997 -21.235  12.380  6.00  0.00           H  
ATOM   2209  H62  DA A  69       2.328 -20.857  10.790  3.00  0.00           H  
ATOM   2210 H2''  DA A  69       0.897 -13.702   9.300  1.00  0.00           H  
ATOM   2211 H5''  DA A  69      -3.652 -14.347   9.970  3.00  0.00           H  
ATOM   2212  P    DC A  70      -1.369 -10.856  10.920  7.00  0.00           P  
ATOM   2213  C5'  DC A  70      -0.616 -10.200   8.390  5.00  0.00           C  
ATOM   2214  O5'  DC A  70      -1.657 -10.450   9.370  7.00  0.00           O  
ATOM   2215  C4'  DC A  70      -1.009  -9.095   7.330  4.00  0.00           C  
ATOM   2216  O4'  DC A  70      -2.144  -9.414   6.560  1.00  0.00           O  
ATOM   2217  C3'  DC A  70      -1.274  -7.723   7.940  4.00  0.00           C  
ATOM   2218  O3'  DC A  70      -0.028  -7.042   8.260  5.00  0.00           O  
ATOM   2219  C2'  DC A  70      -2.009  -7.084   6.830  8.00  0.00           C  
ATOM   2220  C1'  DC A  70      -2.875  -8.227   6.220  2.00  0.00           C  
ATOM   2221  N1   DC A  70      -4.319  -8.225   6.720  3.00  0.00           N  
ATOM   2222  C2   DC A  70      -5.374  -8.039   5.740  9.00  0.00           C  
ATOM   2223  O2   DC A  70      -5.190  -7.872   4.550  8.00  0.00           O  
ATOM   2224  N3   DC A  70      -6.652  -7.946   6.210  2.00  0.00           N  
ATOM   2225  C4   DC A  70      -6.895  -8.020   7.520  1.00  0.00           C  
ATOM   2226  N4   DC A  70      -8.168  -7.776   7.900  2.00  0.00           N  
ATOM   2227  C5   DC A  70      -5.926  -8.308   8.540  3.00  0.00           C  
ATOM   2228  C6   DC A  70      -4.658  -8.472   8.060  2.00  0.00           C  
ATOM   2229  OP1  DC A  70      -0.476  -9.810  11.500  6.00  0.00           O  
ATOM   2230  OP2  DC A  70      -2.670 -11.108  11.570  8.00  0.00           O1-
ATOM   2231  H5   DC A  70      -6.047  -8.326   9.690  6.00  0.00           H  
ATOM   2232  H6   DC A  70      -3.852  -8.643   8.720  1.00  0.00           H  
ATOM   2233  H1'  DC A  70      -2.973  -8.108   5.180  5.00  0.00           H  
ATOM   2234  H2'  DC A  70      -2.665  -6.267   7.090  8.00  0.00           H  
ATOM   2235  H3'  DC A  70      -1.935  -7.861   8.800  6.00  0.00           H  
ATOM   2236  H4'  DC A  70      -0.202  -8.883   6.610  5.00  0.00           H  
ATOM   2237  H41  DC A  70      -8.714  -7.380   7.210  4.00  0.00           H  
ATOM   2238  H5'  DC A  70      -0.416 -11.149   7.910  4.00  0.00           H  
ATOM   2239  H42  DC A  70      -8.393  -7.836   8.840  9.00  0.00           H  
ATOM   2240 H2''  DC A  70      -1.261  -6.770   6.080  5.00  0.00           H  
ATOM   2241 H5''  DC A  70       0.265  -9.887   8.940  2.00  0.00           H  
ATOM   2242  P    DC A  71      -0.043  -5.595   8.820  9.00  0.00           P  
ATOM   2243  C5'  DC A  71       0.431  -4.580   6.450  2.00  0.00           C  
ATOM   2244  O5'  DC A  71      -0.347  -4.616   7.630  1.00  0.00           O  
ATOM   2245  C4'  DC A  71      -0.028  -3.392   5.650  0.00  0.00           C  
ATOM   2246  O4'  DC A  71      -1.418  -3.414   5.380  8.00  0.00           O  
ATOM   2247  C3'  DC A  71       0.213  -2.076   6.280  7.00  0.00           C  
ATOM   2248  O3'  DC A  71       1.551  -1.668   5.870  7.00  0.00           O  
ATOM   2249  C2'  DC A  71      -0.810  -1.197   5.610  4.00  0.00           C  
ATOM   2250  C1'  DC A  71      -2.024  -2.124   5.340  3.00  0.00           C  
ATOM   2251  N1   DC A  71      -3.100  -2.101   6.310  6.00  0.00           N  
ATOM   2252  C2   DC A  71      -4.376  -1.630   5.940  6.00  0.00           C  
ATOM   2253  O2   DC A  71      -4.514  -1.243   4.780  8.00  0.00           O  
ATOM   2254  N3   DC A  71      -5.430  -1.645   6.770  2.00  0.00           N  
ATOM   2255  C4   DC A  71      -5.294  -2.088   8.000  2.00  0.00           C  
ATOM   2256  N4   DC A  71      -6.315  -1.962   8.780  4.00  0.00           N  
ATOM   2257  C5   DC A  71      -4.065  -2.584   8.480  3.00  0.00           C  
ATOM   2258  C6   DC A  71      -2.957  -2.536   7.670  0.00  0.00           C  
ATOM   2259  OP1  DC A  71       1.342  -5.299   9.190  9.00  0.00           O  
ATOM   2260  OP2  DC A  71      -1.050  -5.529   9.920  7.00  0.00           O1-
ATOM   2261  H5   DC A  71      -3.956  -2.985   9.470  4.00  0.00           H  
ATOM   2262  H6   DC A  71      -2.048  -3.011   7.910  0.00  0.00           H  
ATOM   2263  H1'  DC A  71      -2.342  -1.851   4.360  3.00  0.00           H  
ATOM   2264  H2'  DC A  71      -0.961  -0.360   6.330  9.00  0.00           H  
ATOM   2265  H3'  DC A  71       0.088  -2.194   7.360  2.00  0.00           H  
ATOM   2266  H4'  DC A  71       0.490  -3.324   4.720  0.00  0.00           H  
ATOM   2267  H41  DC A  71      -7.239  -1.650   8.460  4.00  0.00           H  
ATOM   2268  H5'  DC A  71       0.493  -5.550   5.960  9.00  0.00           H  
ATOM   2269  H42  DC A  71      -6.237  -2.307   9.670  1.00  0.00           H  
ATOM   2270 H2''  DC A  71      -0.301  -0.934   4.690  8.00  0.00           H  
ATOM   2271 H5''  DC A  71       1.543  -4.379   6.800  5.00  0.00           H  
ATOM   2272  P    DC A  72       2.307  -0.476   6.640  8.00  0.00           P  
ATOM   2273  C5'  DC A  72       1.696   1.405   4.850  6.00  0.00           C  
ATOM   2274  O5'  DC A  72       1.683   0.909   6.160  8.00  0.00           O  
ATOM   2275  C4'  DC A  72       1.048   2.767   4.650  3.00  0.00           C  
ATOM   2276  O4'  DC A  72      -0.206   2.784   5.280  1.00  0.00           O  
ATOM   2277  C3'  DC A  72       1.851   3.870   5.350  2.00  0.00           C  
ATOM   2278  O3'  DC A  72       1.940   5.105   4.590  7.00  0.00           O  
ATOM   2279  C2'  DC A  72       1.102   4.209   6.630  3.00  0.00           C  
ATOM   2280  C1'  DC A  72      -0.276   3.889   6.100  2.00  0.00           C  
ATOM   2281  N1   DC A  72      -1.281   3.788   7.140  8.00  0.00           N  
ATOM   2282  C2   DC A  72      -2.504   4.351   6.910  8.00  0.00           C  
ATOM   2283  O2   DC A  72      -2.875   4.768   5.810  2.00  0.00           O  
ATOM   2284  N3   DC A  72      -3.417   4.448   7.890  3.00  0.00           N  
ATOM   2285  C4   DC A  72      -3.144   3.905   9.080  6.00  0.00           C  
ATOM   2286  N4   DC A  72      -4.054   4.053  10.020  2.00  0.00           N  
ATOM   2287  C5   DC A  72      -1.928   3.228   9.340  9.00  0.00           C  
ATOM   2288  C6   DC A  72      -1.014   3.198   8.400  6.00  0.00           C  
ATOM   2289  OP1  DC A  72       3.660  -0.473   6.220  2.00  0.00           O  
ATOM   2290  OP2  DC A  72       2.060  -0.476   8.090  3.00  0.00           O1-
ATOM   2291  H5   DC A  72      -1.850   2.617  10.310  3.00  0.00           H  
ATOM   2292  H6   DC A  72      -0.012   2.727   8.630  2.00  0.00           H  
ATOM   2293  H1'  DC A  72      -0.506   4.715   5.440  4.00  0.00           H  
ATOM   2294  H2'  DC A  72       1.369   3.545   7.410  7.00  0.00           H  
ATOM   2295  H3'  DC A  72       2.835   3.550   5.610  4.00  0.00           H  
ATOM   2296  H4'  DC A  72       0.912   3.072   3.650  1.00  0.00           H  
ATOM   2297  H41  DC A  72      -4.984   4.485   9.820  0.00  0.00           H  
ATOM   2298  H5'  DC A  72       1.292   0.659   4.070  9.00  0.00           H  
ATOM   2299  H42  DC A  72      -3.905   3.396  10.770  5.00  0.00           H  
ATOM   2300 H2''  DC A  72       1.302   5.228   6.840  6.00  0.00           H  
ATOM   2301 H5''  DC A  72       2.755   1.562   4.700  5.00  0.00           H  
ATOM   2302  P    DT A  73       3.080   5.419   3.620  5.00  0.00           P  
ATOM   2303  C5'  DT A  73       5.230   5.485   5.160  0.00  0.00           C  
ATOM   2304  O5'  DT A  73       4.163   6.227   4.610  0.00  0.00           O  
ATOM   2305  C4'  DT A  73       6.384   6.351   5.570  4.00  0.00           C  
ATOM   2306  O4'  DT A  73       6.772   7.093   4.390  3.00  0.00           O  
ATOM   2307  C3'  DT A  73       6.129   7.287   6.700  0.00  0.00           C  
ATOM   2308  O3'  DT A  73       7.274   7.579   7.360  5.00  0.00           O  
ATOM   2309  C2'  DT A  73       5.648   8.551   6.000  1.00  0.00           C  
ATOM   2310  C1'  DT A  73       6.412   8.462   4.650  3.00  0.00           C  
ATOM   2311  N1   DT A  73       5.829   9.208   3.520  2.00  0.00           N  
ATOM   2312  C2   DT A  73       6.667  10.056   2.770  2.00  0.00           C  
ATOM   2313  O2   DT A  73       7.901  10.144   2.990  1.00  0.00           O  
ATOM   2314  N3   DT A  73       6.127  10.873   1.760  9.00  0.00           N  
ATOM   2315  C4   DT A  73       4.740  10.763   1.420  5.00  0.00           C  
ATOM   2316  O4   DT A  73       4.352  11.494   0.540  0.00  0.00           O  
ATOM   2317  C5   DT A  73       3.967   9.884   2.280  7.00  0.00           C  
ATOM   2318  C6   DT A  73       4.515   9.129   3.270  8.00  0.00           C  
ATOM   2319  C7   DT A  73       2.414   9.828   2.160  6.00  0.00           C  
ATOM   2320  OP1  DT A  73       2.458   6.386   2.660  2.00  0.00           O  
ATOM   2321  OP2  DT A  73       3.727   4.215   3.100  8.00  0.00           O1-
ATOM   2322  H3   DT A  73       6.741  11.230   1.050  9.00  0.00           H  
ATOM   2323  H6   DT A  73       3.911   8.581   3.900  8.00  0.00           H  
ATOM   2324  H1'  DT A  73       7.273   8.973   4.940  8.00  0.00           H  
ATOM   2325  H2'  DT A  73       4.639   8.520   5.810  1.00  0.00           H  
ATOM   2326  H3'  DT A  73       5.359   6.863   7.330  0.00  0.00           H  
ATOM   2327  H4'  DT A  73       7.188   5.633   5.800  4.00  0.00           H  
ATOM   2328  H5'  DT A  73       5.661   4.845   4.460  3.00  0.00           H  
ATOM   2329  H71  DT A  73       2.027  10.792   2.490  1.00  0.00           H  
ATOM   2330  H72  DT A  73       2.173   9.568   1.190  4.00  0.00           H  
ATOM   2331  H73  DT A  73       2.004   8.970   2.760  6.00  0.00           H  
ATOM   2332 H2''  DT A  73       5.824   9.496   6.480  9.00  0.00           H  
ATOM   2333 H5''  DT A  73       4.872   4.982   6.040  5.00  0.00           H  
ATOM   2334  P    DA A  74       7.509   6.992   8.810  5.00  0.00           P  
ATOM   2335  C5'  DA A  74       6.557   7.796  11.220  4.00  0.00           C  
ATOM   2336  O5'  DA A  74       6.523   7.928   9.750  4.00  0.00           O  
ATOM   2337  C4'  DA A  74       5.542   8.683  11.970  8.00  0.00           C  
ATOM   2338  O4'  DA A  74       5.633  10.065  11.740  4.00  0.00           O  
ATOM   2339  C3'  DA A  74       4.166   8.347  11.570  5.00  0.00           C  
ATOM   2340  O3'  DA A  74       3.804   7.195  12.310  5.00  0.00           O  
ATOM   2341  C2'  DA A  74       3.415   9.555  12.150  3.00  0.00           C  
ATOM   2342  C1'  DA A  74       4.340  10.650  11.620  7.00  0.00           C  
ATOM   2343  N1   DA A  74       1.985  14.507   9.240  0.00  0.00           N  
ATOM   2344  C2   DA A  74       2.299  14.248  10.500  6.00  0.00           C  
ATOM   2345  N3   DA A  74       2.922  13.243  11.050  3.00  0.00           N  
ATOM   2346  C4   DA A  74       3.246  12.305  10.080  2.00  0.00           C  
ATOM   2347  C5   DA A  74       3.140  12.401   8.730  5.00  0.00           C  
ATOM   2348  C6   DA A  74       2.501  13.635   8.390  2.00  0.00           C  
ATOM   2349  N6   DA A  74       2.178  13.899   7.140  0.00  0.00           N  
ATOM   2350  N7   DA A  74       3.638  11.295   8.110  5.00  0.00           N  
ATOM   2351  C8   DA A  74       4.183  10.648   9.100  1.00  0.00           C  
ATOM   2352  N9   DA A  74       3.997  11.164  10.310  4.00  0.00           N  
ATOM   2353  OP1  DA A  74       8.919   7.239   9.180  4.00  0.00           O  
ATOM   2354  OP2  DA A  74       7.061   5.582   8.850  2.00  0.00           O1-
ATOM   2355  H2   DA A  74       2.008  15.061  11.150  4.00  0.00           H  
ATOM   2356  H8   DA A  74       4.755   9.772   8.820  2.00  0.00           H  
ATOM   2357  H1'  DA A  74       4.220  11.383  12.320  6.00  0.00           H  
ATOM   2358  H2'  DA A  74       2.421   9.659  11.770  6.00  0.00           H  
ATOM   2359  H3'  DA A  74       4.125   8.226  10.500  3.00  0.00           H  
ATOM   2360  H4'  DA A  74       5.536   8.456  13.010  6.00  0.00           H  
ATOM   2361  H5'  DA A  74       7.563   8.018  11.580  5.00  0.00           H  
ATOM   2362  H61  DA A  74       1.727  14.859   7.040  3.00  0.00           H  
ATOM   2363  H62  DA A  74       2.290  13.207   6.430  4.00  0.00           H  
ATOM   2364 H2''  DA A  74       3.349   9.596  13.270  2.00  0.00           H  
ATOM   2365 H5''  DA A  74       6.358   6.742  11.590  6.00  0.00           H  
ATOM   2366  P    DA A  75       2.464   6.371  12.000  8.00  0.00           P  
ATOM   2367  C5'  DA A  75       1.896   6.868  14.480  4.00  0.00           C  
ATOM   2368  O5'  DA A  75       1.539   6.938  13.110  0.00  0.00           O  
ATOM   2369  C4'  DA A  75       1.061   7.790  15.360  6.00  0.00           C  
ATOM   2370  O4'  DA A  75       1.184   9.091  14.910  7.00  0.00           O  
ATOM   2371  C3'  DA A  75      -0.466   7.474  15.390  2.00  0.00           C  
ATOM   2372  O3'  DA A  75      -0.897   7.130  16.710  9.00  0.00           O  
ATOM   2373  C2'  DA A  75      -1.175   8.801  15.120  8.00  0.00           C  
ATOM   2374  C1'  DA A  75      -0.064   9.782  14.950  4.00  0.00           C  
ATOM   2375  N1   DA A  75      -0.513  14.362  12.540  7.00  0.00           N  
ATOM   2376  C2   DA A  75      -0.420  14.014  13.800  9.00  0.00           C  
ATOM   2377  N3   DA A  75      -0.304  12.798  14.370  6.00  0.00           N  
ATOM   2378  C4   DA A  75      -0.311  11.844  13.410  7.00  0.00           C  
ATOM   2379  C5   DA A  75      -0.428  12.046  12.070  0.00  0.00           C  
ATOM   2380  C6   DA A  75      -0.564  13.386  11.680  2.00  0.00           C  
ATOM   2381  N6   DA A  75      -0.729  13.732  10.410  8.00  0.00           N  
ATOM   2382  N7   DA A  75      -0.408  10.775  11.350  9.00  0.00           N  
ATOM   2383  C8   DA A  75      -0.206   9.926  12.370  0.00  0.00           C  
ATOM   2384  N9   DA A  75      -0.175  10.454  13.580  1.00  0.00           N  
ATOM   2385  OP1  DA A  75       2.728   4.944  12.160  8.00  0.00           O  
ATOM   2386  OP2  DA A  75       1.972   6.875  10.710  9.00  0.00           O1-
ATOM   2387  H2   DA A  75      -0.589  14.823  14.490  5.00  0.00           H  
ATOM   2388  H8   DA A  75      -0.248   8.844  12.200  4.00  0.00           H  
ATOM   2389  H1'  DA A  75      -0.015  10.455  15.770  2.00  0.00           H  
ATOM   2390  H2'  DA A  75      -1.880   8.772  14.290  9.00  0.00           H  
ATOM   2391  H3'  DA A  75      -0.670   6.715  14.650  8.00  0.00           H  
ATOM   2392  H4'  DA A  75       1.380   7.738  16.410  6.00  0.00           H  
ATOM   2393  H5'  DA A  75       2.953   7.076  14.750  9.00  0.00           H  
ATOM   2394  H61  DA A  75      -0.962  14.653  10.240  2.00  0.00           H  
ATOM   2395  H62  DA A  75      -0.558  12.973   9.680  9.00  0.00           H  
ATOM   2396 H2''  DA A  75      -1.745   8.940  15.980  3.00  0.00           H  
ATOM   2397 H5''  DA A  75       1.748   5.900  14.790  1.00  0.00           H  
ATOM   2398  P    DC A  76      -1.751   5.809  17.060  2.00  0.00           P  
ATOM   2399  C5'  DC A  76      -4.056   6.668  15.930  7.00  0.00           C  
ATOM   2400  O5'  DC A  76      -2.914   5.751  15.900  1.00  0.00           O  
ATOM   2401  C4'  DC A  76      -5.103   6.664  14.790  6.00  0.00           C  
ATOM   2402  O4'  DC A  76      -4.644   7.567  13.790  8.00  0.00           O  
ATOM   2403  C3'  DC A  76      -5.353   5.329  14.130  3.00  0.00           C  
ATOM   2404  O3'  DC A  76      -6.421   4.582  14.710  5.00  0.00           O  
ATOM   2405  C2'  DC A  76      -5.524   5.575  12.630  6.00  0.00           C  
ATOM   2406  C1'  DC A  76      -4.968   7.009  12.460  3.00  0.00           C  
ATOM   2407  N1   DC A  76      -3.688   7.032  11.680  1.00  0.00           N  
ATOM   2408  C2   DC A  76      -3.683   7.470  10.330  3.00  0.00           C  
ATOM   2409  O2   DC A  76      -4.737   7.886   9.780  8.00  0.00           O  
ATOM   2410  N3   DC A  76      -2.532   7.555   9.570  8.00  0.00           N  
ATOM   2411  C4   DC A  76      -1.475   7.029  10.120  5.00  0.00           C  
ATOM   2412  N4   DC A  76      -0.493   6.825   9.330  6.00  0.00           N  
ATOM   2413  C5   DC A  76      -1.379   6.504  11.440  6.00  0.00           C  
ATOM   2414  C6   DC A  76      -2.475   6.517  12.230  6.00  0.00           C  
ATOM   2415  OP1  DC A  76      -2.285   5.989  18.410  4.00  0.00           O  
ATOM   2416  OP2  DC A  76      -0.898   4.614  16.790  6.00  0.00           O1-
ATOM   2417  H5   DC A  76      -0.430   6.045  11.830  7.00  0.00           H  
ATOM   2418  H6   DC A  76      -2.409   6.052  13.220  4.00  0.00           H  
ATOM   2419  H1'  DC A  76      -5.771   7.555  11.960  1.00  0.00           H  
ATOM   2420  H2'  DC A  76      -4.941   4.821  12.140  2.00  0.00           H  
ATOM   2421  H3'  DC A  76      -4.412   4.836  14.320  8.00  0.00           H  
ATOM   2422  H4'  DC A  76      -6.077   7.060  15.240  6.00  0.00           H  
ATOM   2423  H41  DC A  76      -0.552   7.195   8.420  1.00  0.00           H  
ATOM   2424  H5'  DC A  76      -3.624   7.646  16.010  4.00  0.00           H  
ATOM   2425  H42  DC A  76       0.457   6.537   9.720  4.00  0.00           H  
ATOM   2426 H2''  DC A  76      -6.615   5.431  12.310  0.00  0.00           H  
ATOM   2427 H5''  DC A  76      -4.671   6.365  16.820  3.00  0.00           H  
ATOM   2428  P    DC A  77      -6.486   2.973  14.600  9.00  0.00           P  
ATOM   2429  C5'  DC A  77      -8.924   2.664  13.470  7.00  0.00           C  
ATOM   2430  O5'  DC A  77      -7.513   2.570  13.400  0.00  0.00           O  
ATOM   2431  C4'  DC A  77      -9.580   2.029  12.270  3.00  0.00           C  
ATOM   2432  O4'  DC A  77      -9.132   2.606  11.040  1.00  0.00           O  
ATOM   2433  C3'  DC A  77      -9.495   0.496  12.180  4.00  0.00           C  
ATOM   2434  O3'  DC A  77     -10.618  -0.214  12.810  6.00  0.00           O  
ATOM   2435  C2'  DC A  77      -9.508   0.216  10.730  0.00  0.00           C  
ATOM   2436  C1'  DC A  77      -8.959   1.554  10.080  9.00  0.00           C  
ATOM   2437  N1   DC A  77      -7.476   1.583   9.770  1.00  0.00           N  
ATOM   2438  C2   DC A  77      -7.025   1.715   8.430  1.00  0.00           C  
ATOM   2439  O2   DC A  77      -7.770   1.884   7.450  7.00  0.00           O  
ATOM   2440  N3   DC A  77      -5.727   1.474   8.080  8.00  0.00           N  
ATOM   2441  C4   DC A  77      -4.930   1.081   9.040  2.00  0.00           C  
ATOM   2442  N4   DC A  77      -3.747   0.829   8.680  5.00  0.00           N  
ATOM   2443  C5   DC A  77      -5.300   0.859  10.360  7.00  0.00           C  
ATOM   2444  C6   DC A  77      -6.597   1.119  10.740  1.00  0.00           C  
ATOM   2445  OP1  DC A  77      -7.050   2.537  15.860  8.00  0.00           O  
ATOM   2446  OP2  DC A  77      -5.138   2.549  14.160  0.00  0.00           O1-
ATOM   2447  H5   DC A  77      -4.659   0.196  10.990  1.00  0.00           H  
ATOM   2448  H6   DC A  77      -6.882   0.984  11.820  7.00  0.00           H  
ATOM   2449  H1'  DC A  77      -9.476   1.683   9.160  0.00  0.00           H  
ATOM   2450  H2'  DC A  77      -8.972  -0.640  10.350  6.00  0.00           H  
ATOM   2451  H3'  DC A  77      -8.532   0.233  12.710  7.00  0.00           H  
ATOM   2452  H4'  DC A  77     -10.582   2.235  12.440  9.00  0.00           H  
ATOM   2453  H41  DC A  77      -3.576   0.799   7.700  0.00  0.00           H  
ATOM   2454  H5'  DC A  77      -9.212   3.706  13.510  3.00  0.00           H  
ATOM   2455  H42  DC A  77      -3.081   0.510   9.360  8.00  0.00           H  
ATOM   2456 H2''  DC A  77     -10.587   0.165  10.340  5.00  0.00           H  
ATOM   2457 H5''  DC A  77      -9.311   2.221  14.380  9.00  0.00           H  
ATOM   2458  P    DC A  78     -10.440  -1.771  13.100  1.00  0.00           P  
ATOM   2459  C5'  DC A  78     -12.122  -2.436  11.280  7.00  0.00           C  
ATOM   2460  O5'  DC A  78     -10.794  -2.398  11.730  4.00  0.00           O  
ATOM   2461  C4'  DC A  78     -12.183  -3.314  10.040  6.00  0.00           C  
ATOM   2462  O4'  DC A  78     -11.258  -2.874   9.040  8.00  0.00           O  
ATOM   2463  C3'  DC A  78     -11.734  -4.663  10.250  6.00  0.00           C  
ATOM   2464  O3'  DC A  78     -12.732  -5.470  10.820  8.00  0.00           O  
ATOM   2465  C2'  DC A  78     -11.440  -5.111   8.850  0.00  0.00           C  
ATOM   2466  C1'  DC A  78     -10.858  -3.913   8.120  4.00  0.00           C  
ATOM   2467  N1   DC A  78      -9.397  -4.184   8.120  2.00  0.00           N  
ATOM   2468  C2   DC A  78      -8.771  -4.394   6.910  8.00  0.00           C  
ATOM   2469  O2   DC A  78      -9.305  -4.285   5.810  3.00  0.00           O  
ATOM   2470  N3   DC A  78      -7.456  -4.688   6.790  4.00  0.00           N  
ATOM   2471  C4   DC A  78      -6.777  -4.873   7.880  7.00  0.00           C  
ATOM   2472  N4   DC A  78      -5.528  -5.237   7.730  8.00  0.00           N  
ATOM   2473  C5   DC A  78      -7.340  -4.691   9.180  0.00  0.00           C  
ATOM   2474  C6   DC A  78      -8.628  -4.325   9.230  2.00  0.00           C  
ATOM   2475  OP1  DC A  78     -11.365  -2.077  14.140  9.00  0.00           O  
ATOM   2476  OP2  DC A  78      -9.033  -2.054  13.350  8.00  0.00           O1-
ATOM   2477  H5   DC A  78      -6.864  -4.886  10.070  1.00  0.00           H  
ATOM   2478  H6   DC A  78      -9.081  -4.229  10.180  6.00  0.00           H  
ATOM   2479  H1'  DC A  78     -11.390  -3.866   7.170  3.00  0.00           H  
ATOM   2480  H2'  DC A  78     -10.822  -6.027   8.850  9.00  0.00           H  
ATOM   2481  H3'  DC A  78     -10.818  -4.684  10.870  3.00  0.00           H  
ATOM   2482  H4'  DC A  78     -13.221  -3.285   9.670  3.00  0.00           H  
ATOM   2483  H41  DC A  78      -5.103  -5.208   6.840  0.00  0.00           H  
ATOM   2484  H5'  DC A  78     -12.439  -1.430  11.030  5.00  0.00           H  
ATOM   2485  H42  DC A  78      -4.923  -5.489   8.470  7.00  0.00           H  
ATOM   2486 H2''  DC A  78     -12.374  -5.386   8.240  5.00  0.00           H  
ATOM   2487 H5''  DC A  78     -12.828  -2.902  11.960  4.00  0.00           H  
ATOM   2488  P    DT A  79     -12.339  -6.309  12.130  2.00  0.00           P  
ATOM   2489  C5'  DT A  79     -14.782  -7.465  12.470  3.00  0.00           C  
ATOM   2490  O5'  DT A  79     -13.681  -6.661  12.920  5.00  0.00           O  
ATOM   2491  C4'  DT A  79     -15.916  -6.660  11.870  8.00  0.00           C  
ATOM   2492  O4'  DT A  79     -17.008  -7.639  11.740  9.00  0.00           O  
ATOM   2493  C3'  DT A  79     -16.339  -5.632  12.920  7.00  0.00           C  
ATOM   2494  O3'  DT A  79     -16.984  -4.518  12.350  3.00  0.00           O  
ATOM   2495  C2'  DT A  79     -17.355  -6.520  13.780  1.00  0.00           C  
ATOM   2496  C1'  DT A  79     -18.015  -7.236  12.620  9.00  0.00           C  
ATOM   2497  N1   DT A  79     -18.974  -8.402  12.830  7.00  0.00           N  
ATOM   2498  C2   DT A  79     -19.926  -8.494  11.860  1.00  0.00           C  
ATOM   2499  O2   DT A  79     -20.132  -7.608  10.970  5.00  0.00           O  
ATOM   2500  N3   DT A  79     -20.841  -9.555  11.970  6.00  0.00           N  
ATOM   2501  C4   DT A  79     -20.633 -10.623  12.820  0.00  0.00           C  
ATOM   2502  O4   DT A  79     -21.403 -11.579  12.820  4.00  0.00           O  
ATOM   2503  C5   DT A  79     -19.521 -10.487  13.740  8.00  0.00           C  
ATOM   2504  C6   DT A  79     -18.700  -9.360  13.760  9.00  0.00           C  
ATOM   2505  C7   DT A  79     -19.317 -11.559  14.750  7.00  0.00           C  
ATOM   2506  OP1  DT A  79     -11.781  -7.559  11.560  4.00  0.00           O  
ATOM   2507  OP2  DT A  79     -11.457  -5.528  13.070  6.00  0.00           O1-
ATOM   2508  H3   DT A  79     -21.614  -9.653  11.310  2.00  0.00           H  
ATOM   2509  H6   DT A  79     -17.870  -9.253  14.430  5.00  0.00           H  
ATOM   2510  H1'  DT A  79     -18.550  -6.378  12.120  3.00  0.00           H  
ATOM   2511  H2'  DT A  79     -16.872  -7.097  14.500  0.00  0.00           H  
ATOM   2512  H3'  DT A  79     -15.545  -5.344  13.520  5.00  0.00           H  
ATOM   2513  H4'  DT A  79     -15.701  -6.161  10.950  5.00  0.00           H  
ATOM   2514  H5'  DT A  79     -15.208  -7.984  13.350  0.00  0.00           H  
ATOM   2515  H71  DT A  79     -18.648 -11.305  15.610  3.00  0.00           H  
ATOM   2516  H72  DT A  79     -20.223 -11.992  15.170  7.00  0.00           H  
ATOM   2517  H73  DT A  79     -18.792 -12.345  14.240  0.00  0.00           H  
ATOM   2518 H2''  DT A  79     -18.167  -5.902  14.240  8.00  0.00           H  
ATOM   2519 H5''  DT A  79     -14.410  -8.189  11.750  0.00  0.00           H  
ATOM   2520  P    DA A  80     -17.622  -3.362  13.130  0.00  0.00           P  
ATOM   2521  C5'  DA A  80     -20.026  -3.670  12.330  4.00  0.00           C  
ATOM   2522  O5'  DA A  80     -19.064  -3.717  13.440  5.00  0.00           O  
ATOM   2523  C4'  DA A  80     -21.300  -4.504  12.620  7.00  0.00           C  
ATOM   2524  O4'  DA A  80     -20.976  -5.789  13.180  7.00  0.00           O  
ATOM   2525  C3'  DA A  80     -22.313  -3.679  13.490  5.00  0.00           C  
ATOM   2526  O3'  DA A  80     -23.494  -3.670  12.710  2.00  0.00           O  
ATOM   2527  C2'  DA A  80     -22.342  -4.593  14.730  6.00  0.00           C  
ATOM   2528  C1'  DA A  80     -21.955  -6.034  14.200  1.00  0.00           C  
ATOM   2529  N1   DA A  80     -22.305 -10.426  16.870  3.00  0.00           N  
ATOM   2530  C2   DA A  80     -22.965  -9.980  15.840  0.00  0.00           C  
ATOM   2531  N3   DA A  80     -22.756  -8.776  15.210  6.00  0.00           N  
ATOM   2532  C4   DA A  80     -21.675  -8.111  15.660  6.00  0.00           C  
ATOM   2533  C5   DA A  80     -20.816  -8.508  16.650  1.00  0.00           C  
ATOM   2534  C6   DA A  80     -21.212  -9.742  17.270  8.00  0.00           C  
ATOM   2535  N6   DA A  80     -20.433 -10.432  18.120  9.00  0.00           N  
ATOM   2536  N7   DA A  80     -19.907  -7.538  16.940  9.00  0.00           N  
ATOM   2537  C8   DA A  80     -20.180  -6.686  16.020  5.00  0.00           C  
ATOM   2538  N9   DA A  80     -21.279  -6.849  15.280  5.00  0.00           N  
ATOM   2539  OP1  DA A  80     -17.642  -2.262  12.080  7.00  0.00           O  
ATOM   2540  OP2  DA A  80     -16.858  -3.169  14.360  4.00  0.00           O1-
ATOM   2541  H2   DA A  80     -23.922 -10.429  15.540  0.00  0.00           H  
ATOM   2542  H8   DA A  80     -19.569  -5.815  15.750  2.00  0.00           H  
ATOM   2543  H1'  DA A  80     -22.843  -6.560  13.810  7.00  0.00           H  
ATOM   2544  H2'  DA A  80     -21.558  -4.184  15.310  9.00  0.00           H  
ATOM   2545  H3'  DA A  80     -21.970  -2.641  13.750  2.00  0.00           H  
ATOM   2546  H4'  DA A  80     -21.707  -4.770  11.640  7.00  0.00           H  
ATOM   2547  H5'  DA A  80     -19.399  -4.069  11.530  8.00  0.00           H  
ATOM   2548  H61  DA A  80     -20.855 -11.188  18.630  1.00  0.00           H  
ATOM   2549  H62  DA A  80     -19.562 -10.013  18.490  2.00  0.00           H  
ATOM   2550 H2''  DA A  80     -23.294  -4.621  15.160  2.00  0.00           H  
ATOM   2551 H5''  DA A  80     -20.373  -2.674  12.100  6.00  0.00           H  
ATOM   2552  P    DA A  81     -24.756  -2.880  13.160  8.00  0.00           P  
ATOM   2553  C5'  DA A  81     -25.985  -5.128  13.320  8.00  0.00           C  
ATOM   2554  O5'  DA A  81     -25.506  -4.003  14.020  1.00  0.00           O  
ATOM   2555  C4'  DA A  81     -26.657  -6.294  14.140  7.00  0.00           C  
ATOM   2556  O4'  DA A  81     -25.752  -7.135  15.010  8.00  0.00           O  
ATOM   2557  C3'  DA A  81     -27.712  -5.800  15.140  6.00  0.00           C  
ATOM   2558  O3'  DA A  81     -28.962  -6.287  14.670  8.00  0.00           O  
ATOM   2559  C2'  DA A  81     -27.381  -6.313  16.570  5.00  0.00           C  
ATOM   2560  C1'  DA A  81     -26.413  -7.478  16.270  8.00  0.00           C  
ATOM   2561  N1   DA A  81     -24.624 -10.872  19.790  8.00  0.00           N  
ATOM   2562  C2   DA A  81     -25.573 -11.049  18.820  8.00  0.00           C  
ATOM   2563  N3   DA A  81     -25.990 -10.103  18.000  4.00  0.00           N  
ATOM   2564  C4   DA A  81     -25.286  -8.926  18.030  2.00  0.00           C  
ATOM   2565  C5   DA A  81     -24.351  -8.621  18.920  6.00  0.00           C  
ATOM   2566  C6   DA A  81     -24.008  -9.697  19.790  3.00  0.00           C  
ATOM   2567  N6   DA A  81     -23.118  -9.601  20.760  3.00  0.00           N  
ATOM   2568  N7   DA A  81     -23.785  -7.287  18.770  3.00  0.00           N  
ATOM   2569  C8   DA A  81     -24.484  -6.863  17.750  8.00  0.00           C  
ATOM   2570  N9   DA A  81     -25.438  -7.723  17.320  7.00  0.00           N  
ATOM   2571  OP1  DA A  81     -25.602  -2.569  12.010  0.00  0.00           O  
ATOM   2572  OP2  DA A  81     -24.296  -1.791  14.080  1.00  0.00           O1-
ATOM   2573  H2   DA A  81     -26.090 -12.110  18.880  7.00  0.00           H  
ATOM   2574  H8   DA A  81     -24.361  -5.843  17.440  9.00  0.00           H  
ATOM   2575  H1'  DA A  81     -27.106  -8.355  16.220  3.00  0.00           H  
ATOM   2576  H2'  DA A  81     -26.983  -5.515  17.180  8.00  0.00           H  
ATOM   2577  H3'  DA A  81     -27.825  -4.717  15.070  3.00  0.00           H  
ATOM   2578  H4'  DA A  81     -27.156  -6.881  13.300  4.00  0.00           H  
ATOM   2579  H5'  DA A  81     -25.258  -5.551  12.770  3.00  0.00           H  
ATOM   2580  H61  DA A  81     -23.231 -10.325  21.430  0.00  0.00           H  
ATOM   2581  H62  DA A  81     -22.918  -8.681  21.100  0.00  0.00           H  
ATOM   2582 H2''  DA A  81     -28.231  -6.871  17.060  0.00  0.00           H  
ATOM   2583 H5''  DA A  81     -26.680  -4.683  12.600  6.00  0.00           H  
ATOM   2584  P    DC A  82     -30.394  -6.010  15.410  5.00  0.00           P  
ATOM   2585  C5'  DC A  82     -30.548  -8.492  16.200  1.00  0.00           C  
ATOM   2586  O5'  DC A  82     -30.767  -7.151  16.490  0.00  0.00           O  
ATOM   2587  C4'  DC A  82     -30.658  -9.406  17.350  9.00  0.00           C  
ATOM   2588  O4'  DC A  82     -29.404  -9.380  18.020  7.00  0.00           O  
ATOM   2589  C3'  DC A  82     -31.796  -9.292  18.400  8.00  0.00           C  
ATOM   2590  O3'  DC A  82     -32.300 -10.554  18.570  6.00  0.00           O  
ATOM   2591  C2'  DC A  82     -31.025  -8.750  19.610  7.00  0.00           C  
ATOM   2592  C1'  DC A  82     -29.673  -9.450  19.420  1.00  0.00           C  
ATOM   2593  N1   DC A  82     -28.593  -8.897  20.190  1.00  0.00           N  
ATOM   2594  C2   DC A  82     -28.078  -9.594  21.300  0.00  0.00           C  
ATOM   2595  O2   DC A  82     -28.468 -10.712  21.630  5.00  0.00           O  
ATOM   2596  N3   DC A  82     -26.970  -9.155  21.910  1.00  0.00           N  
ATOM   2597  C4   DC A  82     -26.567  -7.944  21.650  5.00  0.00           C  
ATOM   2598  N4   DC A  82     -25.441  -7.553  22.150  7.00  0.00           N  
ATOM   2599  C5   DC A  82     -27.227  -7.004  20.730  7.00  0.00           C  
ATOM   2600  C6   DC A  82     -28.194  -7.546  19.950  8.00  0.00           C  
ATOM   2601  OP1  DC A  82     -31.383  -6.091  14.340  6.00  0.00           O  
ATOM   2602  OP2  DC A  82     -30.236  -4.745  16.140  6.00  0.00           O1-
ATOM   2603  H5   DC A  82     -27.066  -5.925  20.650  4.00  0.00           H  
ATOM   2604  H6   DC A  82     -28.748  -6.931  19.250  1.00  0.00           H  
ATOM   2605  H1'  DC A  82     -29.881 -10.514  19.720  4.00  0.00           H  
ATOM   2606  H2'  DC A  82     -30.935  -7.646  19.560  9.00  0.00           H  
ATOM   2607  H3'  DC A  82     -32.556  -8.559  18.030  3.00  0.00           H  
ATOM   2608  H4'  DC A  82     -30.706 -10.389  16.930  3.00  0.00           H  
ATOM   2609  H41  DC A  82     -25.109  -8.194  22.860  4.00  0.00           H  
ATOM   2610  H5'  DC A  82     -29.555  -8.676  15.800  2.00  0.00           H  
ATOM   2611  H42  DC A  82     -25.117  -6.711  21.770  4.00  0.00           H  
ATOM   2612 H2''  DC A  82     -31.507  -9.072  20.550  2.00  0.00           H  
ATOM   2613 H5''  DC A  82     -31.355  -8.835  15.520  2.00  0.00           H  
ATOM   2614  P    DC A  83     -33.757 -10.926  19.150  4.00  0.00           P  
ATOM   2615  C5'  DC A  83     -33.375 -12.097  21.460  2.00  0.00           C  
ATOM   2616  O5'  DC A  83     -33.659 -10.884  20.700  9.00  0.00           O  
ATOM   2617  C4'  DC A  83     -32.938 -11.906  22.870  0.00  0.00           C  
ATOM   2618  O4'  DC A  83     -31.605 -11.408  22.990  5.00  0.00           O  
ATOM   2619  C3'  DC A  83     -33.881 -11.118  23.800  1.00  0.00           C  
ATOM   2620  O3'  DC A  83     -34.348 -11.889  24.900  2.00  0.00           O  
ATOM   2621  C2'  DC A  83     -32.954  -9.970  24.240  9.00  0.00           C  
ATOM   2622  C1'  DC A  83     -31.581 -10.595  24.210  2.00  0.00           C  
ATOM   2623  N1   DC A  83     -30.448  -9.613  24.370  5.00  0.00           N  
ATOM   2624  C2   DC A  83     -29.563  -9.786  25.430  0.00  0.00           C  
ATOM   2625  O2   DC A  83     -29.777 -10.643  26.290  1.00  0.00           O  
ATOM   2626  N3   DC A  83     -28.506  -8.942  25.630  4.00  0.00           N  
ATOM   2627  C4   DC A  83     -28.323  -7.949  24.740  2.00  0.00           C  
ATOM   2628  N4   DC A  83     -27.209  -7.326  24.730  0.00  0.00           N  
ATOM   2629  C5   DC A  83     -29.225  -7.672  23.680  3.00  0.00           C  
ATOM   2630  C6   DC A  83     -30.231  -8.547  23.490  6.00  0.00           C  
ATOM   2631  OP1  DC A  83     -33.975 -12.330  18.690  2.00  0.00           O  
ATOM   2632  OP2  DC A  83     -34.755  -9.926  18.780  4.00  0.00           O1-
ATOM   2633  H5   DC A  83     -29.102  -6.830  23.020  3.00  0.00           H  
ATOM   2634  H6   DC A  83     -30.809  -8.381  22.590  3.00  0.00           H  
ATOM   2635  H1'  DC A  83     -31.610 -11.288  25.080  3.00  0.00           H  
ATOM   2636  H2'  DC A  83     -33.081  -9.256  23.470  7.00  0.00           H  
ATOM   2637  H3'  DC A  83     -34.688 -10.703  23.250  1.00  0.00           H  
ATOM   2638  H4'  DC A  83     -32.857 -12.938  23.240  4.00  0.00           H  
ATOM   2639  H41  DC A  83     -26.588  -7.425  25.500  6.00  0.00           H  
ATOM   2640  H5'  DC A  83     -32.558 -12.599  21.000  6.00  0.00           H  
ATOM   2641  H42  DC A  83     -26.994  -6.676  23.980  7.00  0.00           H  
ATOM   2642 H2''  DC A  83     -33.178  -9.553  25.230  1.00  0.00           H  
ATOM   2643 H5''  DC A  83     -34.299 -12.810  21.430  4.00  0.00           H  
ATOM   2644  P    DC A  84     -35.701 -11.529  25.700  5.00  0.00           P  
ATOM   2645  C5'  DC A  84     -34.734 -12.110  28.010  5.00  0.00           C  
ATOM   2646  O5'  DC A  84     -35.059 -11.150  27.060  7.00  0.00           O  
ATOM   2647  C4'  DC A  84     -33.675 -11.662  28.970  7.00  0.00           C  
ATOM   2648  O4'  DC A  84     -32.593 -10.935  28.280  6.00  0.00           O  
ATOM   2649  C3'  DC A  84     -34.292 -10.712  30.030  9.00  0.00           C  
ATOM   2650  O3'  DC A  84     -33.992 -11.085  31.340  3.00  0.00           O  
ATOM   2651  C2'  DC A  84     -33.486  -9.442  29.730  4.00  0.00           C  
ATOM   2652  C1'  DC A  84     -32.178  -9.877  29.200  1.00  0.00           C  
ATOM   2653  N1   DC A  84     -31.538  -8.842  28.400  9.00  0.00           N  
ATOM   2654  C2   DC A  84     -30.312  -8.388  28.830  3.00  0.00           C  
ATOM   2655  O2   DC A  84     -29.681  -8.882  29.750  1.00  0.00           O  
ATOM   2656  N3   DC A  84     -29.721  -7.345  28.210  1.00  0.00           N  
ATOM   2657  C4   DC A  84     -30.265  -6.864  27.130  2.00  0.00           C  
ATOM   2658  N4   DC A  84     -29.667  -5.883  26.590  7.00  0.00           N  
ATOM   2659  C5   DC A  84     -31.471  -7.406  26.550  2.00  0.00           C  
ATOM   2660  C6   DC A  84     -32.106  -8.309  27.250  7.00  0.00           C  
ATOM   2661  OP1  DC A  84     -36.483 -12.736  25.870  7.00  0.00           O  
ATOM   2662  OP2  DC A  84     -36.347 -10.304  25.120  7.00  0.00           O1-
ATOM   2663  H5   DC A  84     -31.942  -6.953  25.650  4.00  0.00           H  
ATOM   2664  H6   DC A  84     -33.122  -8.598  27.000  5.00  0.00           H  
ATOM   2665  H1'  DC A  84     -31.540 -10.186  30.070  1.00  0.00           H  
ATOM   2666  H2'  DC A  84     -34.012  -8.905  28.890  4.00  0.00           H  
ATOM   2667  H3'  DC A  84     -35.356 -10.599  29.860  6.00  0.00           H  
ATOM   2668  H4'  DC A  84     -33.186 -12.543  29.380  1.00  0.00           H  
ATOM   2669  H41  DC A  84     -28.897  -5.412  26.970  8.00  0.00           H  
ATOM   2670  H5'  DC A  84     -34.338 -13.025  27.650  6.00  0.00           H  
ATOM   2671  H42  DC A  84     -29.870  -5.559  25.670  7.00  0.00           H  
ATOM   2672 H2''  DC A  84     -33.482  -8.812  30.660  5.00  0.00           H  
ATOM   2673 H5''  DC A  84     -35.723 -12.300  28.480  1.00  0.00           H  
ATOM   2674  P    DT A  85     -34.574 -10.323  32.600  3.00  0.00           P  
ATOM   2675  C5'  DT A  85     -32.204 -10.137  33.540  6.00  0.00           C  
ATOM   2676  O5'  DT A  85     -33.354  -9.449  33.160  7.00  0.00           O  
ATOM   2677  C4'  DT A  85     -31.087  -9.428  34.240  2.00  0.00           C  
ATOM   2678  O4'  DT A  85     -30.437  -8.562  33.290  9.00  0.00           O  
ATOM   2679  C3'  DT A  85     -31.597  -8.568  35.440  2.00  0.00           C  
ATOM   2680  O3'  DT A  85     -30.560  -8.380  36.420  8.00  0.00           O  
ATOM   2681  C2'  DT A  85     -31.739  -7.269  34.760  1.00  0.00           C  
ATOM   2682  C1'  DT A  85     -30.574  -7.212  33.730  1.00  0.00           C  
ATOM   2683  N1   DT A  85     -30.789  -6.251  32.650  2.00  0.00           N  
ATOM   2684  C2   DT A  85     -29.736  -5.420  32.270  8.00  0.00           C  
ATOM   2685  O2   DT A  85     -28.769  -5.297  32.990  5.00  0.00           O  
ATOM   2686  N3   DT A  85     -29.893  -4.700  31.130  5.00  0.00           N  
ATOM   2687  C4   DT A  85     -30.929  -4.843  30.250  8.00  0.00           C  
ATOM   2688  O4   DT A  85     -30.941  -4.138  29.230  6.00  0.00           O  
ATOM   2689  C5   DT A  85     -31.996  -5.750  30.640  2.00  0.00           C  
ATOM   2690  C6   DT A  85     -31.876  -6.422  31.800  3.00  0.00           C  
ATOM   2691  C7   DT A  85     -33.208  -6.002  29.740  1.00  0.00           C  
ATOM   2692  OP1  DT A  85     -34.990 -11.308  33.700  5.00  0.00           O  
ATOM   2693  OP2  DT A  85     -35.622  -9.411  32.080  4.00  0.00           O1-
ATOM   2694  H3   DT A  85     -29.257  -4.005  30.840  3.00  0.00           H  
ATOM   2695  H6   DT A  85     -32.669  -7.211  31.980  3.00  0.00           H  
ATOM   2696  H1'  DT A  85     -29.690  -7.074  34.300  0.00  0.00           H  
ATOM   2697  H2'  DT A  85     -32.702  -7.150  34.280  8.00  0.00           H  
ATOM   2698  H3'  DT A  85     -32.511  -8.952  35.930  8.00  0.00           H  
ATOM   2699  H4'  DT A  85     -30.384 -10.248  34.610  5.00  0.00           H  
ATOM   2700  H5'  DT A  85     -31.717 -10.650  32.680  8.00  0.00           H  
ATOM   2701  H71  DT A  85     -32.854  -6.248  28.780  3.00  0.00           H  
ATOM   2702  H72  DT A  85     -33.903  -6.815  30.010  9.00  0.00           H  
ATOM   2703  H73  DT A  85     -33.872  -5.105  29.580  6.00  0.00           H  
ATOM   2704 H2''  DT A  85     -31.738  -6.447  35.440  9.00  0.00           H  
ATOM   2705 H5''  DT A  85     -32.543 -10.944  34.210  4.00  0.00           H  
ATOM   2706  P    DA A  86     -30.889  -8.172  37.990  0.00  0.00           P  
ATOM   2707  C5'  DA A  86     -29.745  -5.702  38.270  5.00  0.00           C  
ATOM   2708  O5'  DA A  86     -30.956  -6.522  38.120  0.00  0.00           O  
ATOM   2709  C4'  DA A  86     -29.898  -4.210  38.040  6.00  0.00           C  
ATOM   2710  O4'  DA A  86     -29.771  -3.896  36.670  4.00  0.00           O  
ATOM   2711  C3'  DA A  86     -31.201  -3.593  38.460  7.00  0.00           C  
ATOM   2712  O3'  DA A  86     -30.944  -2.440  39.210  0.00  0.00           O  
ATOM   2713  C2'  DA A  86     -31.807  -3.309  37.130  9.00  0.00           C  
ATOM   2714  C1'  DA A  86     -30.609  -2.757  36.350  2.00  0.00           C  
ATOM   2715  N1   DA A  86     -30.210   0.288  32.330  2.00  0.00           N  
ATOM   2716  C2   DA A  86     -29.594   0.224  33.470  8.00  0.00           C  
ATOM   2717  N3   DA A  86     -29.758  -0.655  34.460  4.00  0.00           N  
ATOM   2718  C4   DA A  86     -30.613  -1.613  34.110  3.00  0.00           C  
ATOM   2719  C5   DA A  86     -31.273  -1.780  32.900  1.00  0.00           C  
ATOM   2720  C6   DA A  86     -31.103  -0.666  32.080  9.00  0.00           C  
ATOM   2721  N6   DA A  86     -31.579  -0.479  30.900  9.00  0.00           N  
ATOM   2722  N7   DA A  86     -32.025  -2.955  32.880  8.00  0.00           N  
ATOM   2723  C8   DA A  86     -31.840  -3.364  34.140  4.00  0.00           C  
ATOM   2724  N9   DA A  86     -30.905  -2.708  34.900  2.00  0.00           N  
ATOM   2725  OP1  DA A  86     -29.660  -8.693  38.660  4.00  0.00           O  
ATOM   2726  OP2  DA A  86     -32.250  -8.714  38.280  6.00  0.00           O1-
ATOM   2727  H2   DA A  86     -28.763   0.951  33.560  8.00  0.00           H  
ATOM   2728  H8   DA A  86     -32.335  -4.288  34.500  0.00  0.00           H  
ATOM   2729  H1'  DA A  86     -30.165  -1.868  36.780  8.00  0.00           H  
ATOM   2730  H2'  DA A  86     -32.179  -4.255  36.760  3.00  0.00           H  
ATOM   2731  H3'  DA A  86     -31.826  -4.313  38.980  6.00  0.00           H  
ATOM   2732  H4'  DA A  86     -29.063  -3.696  38.590  9.00  0.00           H  
ATOM   2733  H5'  DA A  86     -28.948  -6.011  37.560  8.00  0.00           H  
ATOM   2734  H61  DA A  86     -31.071   0.135  30.340  4.00  0.00           H  
ATOM   2735  H62  DA A  86     -32.380  -0.981  30.610  9.00  0.00           H  
ATOM   2736 H2''  DA A  86     -32.580  -2.597  37.090  1.00  0.00           H  
ATOM   2737 H5''  DA A  86     -29.375  -5.775  39.310  3.00  0.00           H  
ATOM   2738  P    DA A  87     -30.995  -2.493  40.740  6.00  0.00           P  
ATOM   2739  C5'  DA A  87     -29.349  -0.570  41.630  1.00  0.00           C  
ATOM   2740  O5'  DA A  87     -30.630  -0.994  41.170  4.00  0.00           O  
ATOM   2741  C4'  DA A  87     -29.135   0.881  41.070  0.00  0.00           C  
ATOM   2742  O4'  DA A  87     -29.071   0.900  39.640  9.00  0.00           O  
ATOM   2743  C3'  DA A  87     -30.153   1.845  41.660  1.00  0.00           C  
ATOM   2744  O3'  DA A  87     -29.414   2.903  42.300  8.00  0.00           O  
ATOM   2745  C2'  DA A  87     -30.790   2.321  40.400  7.00  0.00           C  
ATOM   2746  C1'  DA A  87     -29.746   1.981  39.250  1.00  0.00           C  
ATOM   2747  N1   DA A  87     -31.204   2.890  34.310  4.00  0.00           N  
ATOM   2748  C2   DA A  87     -30.384   3.582  35.150  0.00  0.00           C  
ATOM   2749  N3   DA A  87     -30.028   3.265  36.370  7.00  0.00           N  
ATOM   2750  C4   DA A  87     -30.653   2.102  36.860  1.00  0.00           C  
ATOM   2751  C5   DA A  87     -31.623   1.405  36.180  8.00  0.00           C  
ATOM   2752  C6   DA A  87     -31.910   1.952  34.880  6.00  0.00           C  
ATOM   2753  N6   DA A  87     -32.815   1.439  34.080  2.00  0.00           N  
ATOM   2754  N7   DA A  87     -32.153   0.353  36.960  7.00  0.00           N  
ATOM   2755  C8   DA A  87     -31.420   0.430  38.030  8.00  0.00           C  
ATOM   2756  N9   DA A  87     -30.515   1.538  38.070  5.00  0.00           N  
ATOM   2757  OP1  DA A  87     -29.865  -3.384  41.210  6.00  0.00           O  
ATOM   2758  OP2  DA A  87     -32.395  -2.795  41.060  2.00  0.00           O1-
ATOM   2759  H2   DA A  87     -29.951   4.507  34.670  9.00  0.00           H  
ATOM   2760  H8   DA A  87     -31.515  -0.197  38.860  9.00  0.00           H  
ATOM   2761  H1'  DA A  87     -29.034   2.742  38.980  1.00  0.00           H  
ATOM   2762  H2'  DA A  87     -31.746   1.772  40.370  3.00  0.00           H  
ATOM   2763  H3'  DA A  87     -30.934   1.471  42.310  2.00  0.00           H  
ATOM   2764  H4'  DA A  87     -28.228   1.187  41.550  7.00  0.00           H  
ATOM   2765  H5'  DA A  87     -28.571  -1.253  41.140  0.00  0.00           H  
ATOM   2766  H61  DA A  87     -32.975   1.698  33.060  6.00  0.00           H  
ATOM   2767  H62  DA A  87     -33.255   0.583  34.510  0.00  0.00           H  
ATOM   2768 H2''  DA A  87     -30.925   3.364  40.490  0.00  0.00           H  
ATOM   2769 H5''  DA A  87     -29.304  -0.600  42.670  1.00  0.00           H  
ATOM   2770  P    DC A  88     -30.112   4.114  43.010  4.00  0.00           P  
ATOM   2771  C5'  DC A  88     -29.160   5.806  41.220  1.00  0.00           C  
ATOM   2772  O5'  DC A  88     -30.313   5.261  41.930  5.00  0.00           O  
ATOM   2773  C4'  DC A  88     -29.513   6.602  39.930  7.00  0.00           C  
ATOM   2774  O4'  DC A  88     -30.159   5.619  39.080  2.00  0.00           O  
ATOM   2775  C3'  DC A  88     -30.497   7.721  40.090  5.00  0.00           C  
ATOM   2776  O3'  DC A  88     -30.145   8.796  39.210  9.00  0.00           O  
ATOM   2777  C2'  DC A  88     -31.884   7.058  39.680  8.00  0.00           C  
ATOM   2778  C1'  DC A  88     -31.286   6.297  38.500  0.00  0.00           C  
ATOM   2779  N1   DC A  88     -32.325   5.329  37.860  7.00  0.00           N  
ATOM   2780  C2   DC A  88     -32.648   5.463  36.510  9.00  0.00           C  
ATOM   2781  O2   DC A  88     -32.142   6.311  35.840  7.00  0.00           O  
ATOM   2782  N3   DC A  88     -33.475   4.651  35.880  4.00  0.00           N  
ATOM   2783  C4   DC A  88     -34.021   3.669  36.620  8.00  0.00           C  
ATOM   2784  N4   DC A  88     -34.815   2.805  36.030  7.00  0.00           N  
ATOM   2785  C5   DC A  88     -33.785   3.532  38.030  5.00  0.00           C  
ATOM   2786  C6   DC A  88     -32.997   4.428  38.650  4.00  0.00           C  
ATOM   2787  OP1  DC A  88     -29.163   4.607  43.940  8.00  0.00           O  
ATOM   2788  OP2  DC A  88     -31.414   3.609  43.480  3.00  0.00           O1-
ATOM   2789  H5   DC A  88     -34.241   2.709  38.490  0.00  0.00           H  
ATOM   2790  H6   DC A  88     -32.722   4.205  39.650  6.00  0.00           H  
ATOM   2791  H1'  DC A  88     -30.848   6.986  37.750  8.00  0.00           H  
ATOM   2792  H2'  DC A  88     -32.162   6.325  40.500  0.00  0.00           H  
ATOM   2793  H3'  DC A  88     -30.424   7.999  41.140  0.00  0.00           H  
ATOM   2794  H4'  DC A  88     -28.525   6.856  39.570  9.00  0.00           H  
ATOM   2795  H41  DC A  88     -34.856   2.911  35.070  4.00  0.00           H  
ATOM   2796  H5'  DC A  88     -28.599   4.902  40.770  3.00  0.00           H  
ATOM   2797  H42  DC A  88     -35.182   2.022  36.570  5.00  0.00           H  
ATOM   2798 H2''  DC A  88     -32.642   7.763  39.560  6.00  0.00           H  
ATOM   2799 H5''  DC A  88     -28.458   6.321  41.860  8.00  0.00           H  
ATOM   2800  P    DC A  89     -30.532  10.297  39.580  1.00  0.00           P  
ATOM   2801  C5'  DC A  89     -30.552  11.177  37.100  6.00  0.00           C  
ATOM   2802  O5'  DC A  89     -31.269  10.958  38.300  4.00  0.00           O  
ATOM   2803  C4'  DC A  89     -31.407  11.264  35.810  7.00  0.00           C  
ATOM   2804  O4'  DC A  89     -32.070  10.012  35.590  9.00  0.00           O  
ATOM   2805  C3'  DC A  89     -32.438  12.369  35.730  0.00  0.00           C  
ATOM   2806  O3'  DC A  89     -32.460  12.993  34.410  4.00  0.00           O  
ATOM   2807  C2'  DC A  89     -33.689  11.570  35.940  0.00  0.00           C  
ATOM   2808  C1'  DC A  89     -33.356  10.269  35.180  8.00  0.00           C  
ATOM   2809  N1   DC A  89     -34.222   9.110  35.550  8.00  0.00           N  
ATOM   2810  C2   DC A  89     -35.083   8.548  34.600  1.00  0.00           C  
ATOM   2811  O2   DC A  89     -35.005   8.860  33.380  4.00  0.00           O  
ATOM   2812  N3   DC A  89     -36.020   7.644  35.020  1.00  0.00           N  
ATOM   2813  C4   DC A  89     -35.940   7.231  36.260  7.00  0.00           C  
ATOM   2814  N4   DC A  89     -36.786   6.276  36.590  6.00  0.00           N  
ATOM   2815  C5   DC A  89     -35.123   7.741  37.290  2.00  0.00           C  
ATOM   2816  C6   DC A  89     -34.212   8.691  36.870  7.00  0.00           C  
ATOM   2817  OP1  DC A  89     -29.276  11.066  39.760  8.00  0.00           O  
ATOM   2818  OP2  DC A  89     -31.521  10.191  40.700  7.00  0.00           O1-
ATOM   2819  H5   DC A  89     -35.071   7.299  38.320  5.00  0.00           H  
ATOM   2820  H6   DC A  89     -33.528   8.948  37.640  6.00  0.00           H  
ATOM   2821  H1'  DC A  89     -33.436  10.515  34.140  4.00  0.00           H  
ATOM   2822  H2'  DC A  89     -33.862  11.397  36.990  3.00  0.00           H  
ATOM   2823  H3'  DC A  89     -32.331  13.181  36.450  0.00  0.00           H  
ATOM   2824  H4'  DC A  89     -30.678  11.537  35.050  1.00  0.00           H  
ATOM   2825  H41  DC A  89     -37.316   5.968  35.740  0.00  0.00           H  
ATOM   2826  H5'  DC A  89     -29.860  10.345  36.890  4.00  0.00           H  
ATOM   2827  H42  DC A  89     -36.728   5.851  37.470  5.00  0.00           H  
ATOM   2828 H2''  DC A  89     -34.516  12.094  35.560  9.00  0.00           H  
ATOM   2829 H5''  DC A  89     -29.943  12.072  37.250  2.00  0.00           H  
ATOM   2830  P   DC3 A  90     -33.180  14.422  34.070  0.00  0.00           P  
ATOM   2831  C5' DC3 A  90     -34.360  13.171  32.070  7.00  0.00           C  
ATOM   2832  O5' DC3 A  90     -34.412  13.950  33.300  9.00  0.00           O  
ATOM   2833  C4' DC3 A  90     -35.659  12.762  31.460  8.00  0.00           C  
ATOM   2834  O4' DC3 A  90     -36.315  11.653  32.050  7.00  0.00           O  
ATOM   2835  C3' DC3 A  90     -36.779  13.811  31.480  1.00  0.00           C  
ATOM   2836  O3' DC3 A  90     -37.543  13.837  30.250  4.00  0.00           O  
ATOM   2837  C2' DC3 A  90     -37.661  13.510  32.660  2.00  0.00           C  
ATOM   2838  C1' DC3 A  90     -37.647  11.970  32.410  7.00  0.00           C  
ATOM   2839  N1  DC3 A  90     -38.227  11.200  33.510  6.00  0.00           N  
ATOM   2840  C2  DC3 A  90     -39.484  10.607  33.290  4.00  0.00           C  
ATOM   2841  O2  DC3 A  90     -40.240  10.960  32.380  5.00  0.00           O  
ATOM   2842  N3  DC3 A  90     -40.031   9.741  34.170  5.00  0.00           N  
ATOM   2843  C4  DC3 A  90     -39.351   9.468  35.230  3.00  0.00           C  
ATOM   2844  N4  DC3 A  90     -39.937   8.617  36.020  8.00  0.00           N  
ATOM   2845  C5  DC3 A  90     -38.159  10.168  35.590  7.00  0.00           C  
ATOM   2846  C6  DC3 A  90     -37.662  11.106  34.730  7.00  0.00           C  
ATOM   2847  OP1 DC3 A  90     -32.404  15.118  33.030  8.00  0.00           O  
ATOM   2848  OP2 DC3 A  90     -33.567  15.117  35.320  8.00  0.00           O  
ATOM   2849 HO3' DC3 A  90     -38.355  14.270  30.490  1.00  0.00           H  
ATOM   2850  H5  DC3 A  90     -37.671   9.994  36.590  0.00  0.00           H  
ATOM   2851  H6  DC3 A  90     -36.801  11.663  34.900  9.00  0.00           H  
ATOM   2852  H1' DC3 A  90     -38.218  11.814  31.460  8.00  0.00           H  
ATOM   2853  H2' DC3 A  90     -37.307  13.790  33.660  2.00  0.00           H  
ATOM   2854  H3' DC3 A  90     -36.204  14.688  31.660  4.00  0.00           H  
ATOM   2855  H4' DC3 A  90     -35.417  12.529  30.450  1.00  0.00           H  
ATOM   2856  H41 DC3 A  90     -40.755   8.209  35.690  5.00  0.00           H  
ATOM   2857  H5' DC3 A  90     -33.748  12.359  32.340  3.00  0.00           H  
ATOM   2858  H42 DC3 A  90     -39.535   8.465  36.920  9.00  0.00           H  
ATOM   2859 H2'' DC3 A  90     -38.630  14.009  32.530  3.00  0.00           H  
ATOM   2860 H5'' DC3 A  90     -33.722  13.771  31.420  1.00  0.00           H  
ATOM   3171  C   CNT A 208       8.533 -28.024 -13.810  4.00  0.00           C  
ATOM   3172  C   CNT A 208       9.425 -26.943 -13.370  6.00  0.00           C  
ATOM   3173  C   CNT A 208       8.708 -25.750 -13.130  8.00  0.00           C  
ATOM   3174  C   CNT A 208       9.293 -24.579 -12.880  3.00  0.00           C  
ATOM   3175  C   CNT A 208      10.869 -26.839 -13.170  3.00  0.00           C  
ATOM   3176  C   CNT A 208      11.502 -25.579 -13.400  8.00  0.00           C  
ATOM   3177  C   CNT A 208      10.650 -24.461 -13.190  8.00  0.00           C  
ATOM   3178  C   CNT A 208      11.082 -23.208 -13.660  0.00  0.00           C  
ATOM   3179  C   CNT A 208      12.576 -25.324 -14.250  3.00  0.00           C  
ATOM   3180  C   CNT A 208      12.622 -24.280 -15.210  1.00  0.00           C  
ATOM   3181  C   CNT A 208      11.913 -23.104 -14.790  8.00  0.00           C  
ATOM   3182  C   CNT A 208      11.667 -22.092 -15.750  9.00  0.00           C  
ATOM   3183  C   CNT A 208      13.284 -24.202 -16.430  2.00  0.00           C  
ATOM   3184  C   CNT A 208      12.676 -23.483 -17.490  3.00  0.00           C  
ATOM   3185  C   CNT A 208      11.971 -22.289 -17.140  4.00  0.00           C  
ATOM   3186  C   CNT A 208      11.079 -21.693 -18.070  4.00  0.00           C  
ATOM   3187  C   CNT A 208      12.514 -23.807 -18.880  1.00  0.00           C  
ATOM   3188  C   CNT A 208      11.376 -23.569 -19.630  1.00  0.00           C  
ATOM   3189  C   CNT A 208      10.702 -22.425 -19.220  7.00  0.00           C  
ATOM   3190  C   CNT A 208       9.377 -22.263 -19.710  3.00  0.00           C  
ATOM   3191  C   CNT A 208      10.756 -24.284 -20.630  3.00  0.00           C  
ATOM   3192  C   CNT A 208       9.370 -24.339 -20.890  3.00  0.00           C  
ATOM   3193  C   CNT A 208       8.643 -23.185 -20.470  6.00  0.00           C  
ATOM   3194  C   CNT A 208       7.280 -23.334 -20.230  6.00  0.00           C  
ATOM   3195  C   CNT A 208       8.606 -25.463 -21.170  2.00  0.00           C  
ATOM   3196  C   CNT A 208       7.353 -25.780 -20.640  2.00  0.00           C  
ATOM   3197  C   CNT A 208       6.708 -24.644 -20.140  4.00  0.00           C  
ATOM   3198  C   CNT A 208       5.577 -24.759 -19.330  8.00  0.00           C  
ATOM   3199  C   CNT A 208       6.741 -27.049 -20.370  8.00  0.00           C  
ATOM   3200  C   CNT A 208       6.036 -27.108 -19.120  6.00  0.00           C  
ATOM   3201  C   CNT A 208       5.482 -25.943 -18.670  0.00  0.00           C  
ATOM   3202  C   CNT A 208       4.926 -25.914 -17.350  3.00  0.00           C  
ATOM   3203  C   CNT A 208       6.144 -28.172 -18.140  7.00  0.00           C  
ATOM   3204  C   CNT A 208       6.068 -27.975 -16.750  9.00  0.00           C  
ATOM   3205  C   CNT A 208       5.399 -26.788 -16.320  4.00  0.00           C  
ATOM   3206  C   CNT A 208       5.574 -26.341 -14.990  6.00  0.00           C  
ATOM   3207  C   CNT A 208       6.860 -28.524 -15.730  7.00  0.00           C  
ATOM   3208  C   CNT A 208       7.444 -27.806 -14.650  5.00  0.00           C  
ATOM   3209  C   CNT A 208       6.717 -26.650 -14.290  1.00  0.00           C  
ATOM   3210  C   CNT A 208       7.307 -25.744 -13.420  2.00  0.00           C  
ATOM   3211  C   CNT A 208       6.570 -24.691 -12.900  6.00  0.00           C  
ATOM   3212  C   CNT A 208       7.192 -23.622 -12.180  6.00  0.00           C  
ATOM   3213  C   CNT A 208       6.400 -22.484 -11.880  8.00  0.00           C  
ATOM   3214  C   CNT A 208       7.102 -21.335 -11.530  1.00  0.00           C  
ATOM   3215  C   CNT A 208       8.583 -23.433 -12.450  4.00  0.00           C  
ATOM   3216  C   CNT A 208       9.215 -22.200 -12.420  2.00  0.00           C  
ATOM   3217  C   CNT A 208       8.426 -21.118 -12.000  2.00  0.00           C  
ATOM   3218  C   CNT A 208       8.727 -19.858 -12.560  5.00  0.00           C  
ATOM   3219  C   CNT A 208      10.378 -22.009 -13.300  8.00  0.00           C  
ATOM   3220  C   CNT A 208      10.453 -20.798 -14.050  2.00  0.00           C  
ATOM   3221  C   CNT A 208       9.593 -19.765 -13.660  7.00  0.00           C  
ATOM   3222  C   CNT A 208       9.397 -18.708 -14.580  2.00  0.00           C  
ATOM   3223  C   CNT A 208      10.908 -20.969 -15.360  5.00  0.00           C  
ATOM   3224  C   CNT A 208      10.403 -20.107 -16.380  4.00  0.00           C  
ATOM   3225  C   CNT A 208       9.725 -18.918 -15.920  4.00  0.00           C  
ATOM   3226  C   CNT A 208       8.905 -18.221 -16.940  0.00  0.00           C  
ATOM   3227  C   CNT A 208      10.290 -20.611 -17.660  3.00  0.00           C  
ATOM   3228  C   CNT A 208       9.196 -20.188 -18.470  1.00  0.00           C  
ATOM   3229  C   CNT A 208       8.457 -19.038 -18.030  5.00  0.00           C  
ATOM   3230  C   CNT A 208       7.189 -18.892 -18.560  0.00  0.00           C  
ATOM   3231  C   CNT A 208       8.663 -21.089 -19.350  0.00  0.00           C  
ATOM   3232  C   CNT A 208       7.280 -21.024 -19.580  1.00  0.00           C  
ATOM   3233  C   CNT A 208       6.572 -19.941 -19.230  4.00  0.00           C  
ATOM   3234  C   CNT A 208       5.165 -19.989 -19.160  0.00  0.00           C  
ATOM   3235  C   CNT A 208       6.586 -22.219 -19.840  8.00  0.00           C  
ATOM   3236  C   CNT A 208       5.270 -22.395 -19.440  5.00  0.00           C  
ATOM   3237  C   CNT A 208       4.590 -21.256 -19.000  7.00  0.00           C  
ATOM   3238  C   CNT A 208       3.351 -21.407 -18.280  0.00  0.00           C  
ATOM   3239  C   CNT A 208       4.782 -23.657 -18.990  9.00  0.00           C  
ATOM   3240  C   CNT A 208       4.082 -23.677 -17.850  6.00  0.00           C  
ATOM   3241  C   CNT A 208       3.276 -22.581 -17.490  5.00  0.00           C  
ATOM   3242  C   CNT A 208       2.814 -22.529 -16.180  4.00  0.00           C  
ATOM   3243  C   CNT A 208       4.292 -24.768 -16.960  9.00  0.00           C  
ATOM   3244  C   CNT A 208       4.101 -24.495 -15.600  7.00  0.00           C  
ATOM   3245  C   CNT A 208       3.373 -23.362 -15.220  4.00  0.00           C  
ATOM   3246  C   CNT A 208       3.456 -22.929 -13.860  4.00  0.00           C  
ATOM   3247  C   CNT A 208       4.885 -25.161 -14.650  5.00  0.00           C  
ATOM   3248  C   CNT A 208       5.319 -24.465 -13.510  6.00  0.00           C  
ATOM   3249  C   CNT A 208       4.536 -23.390 -13.110  8.00  0.00           C  
ATOM   3250  C   CNT A 208       5.018 -22.517 -12.050  6.00  0.00           C  
ATOM   3251  C   CNT A 208       4.307 -21.393 -11.710  3.00  0.00           C  
ATOM   3252  C   CNT A 208       4.920 -20.314 -11.070  5.00  0.00           C  
ATOM   3253  C   CNT A 208       4.175 -19.157 -10.670  5.00  0.00           C  
ATOM   3254  C   CNT A 208       4.884 -17.947 -10.270  4.00  0.00           C  
ATOM   3255  C   CNT A 208       6.329 -20.234 -11.080  4.00  0.00           C  
ATOM   3256  C   CNT A 208       6.918 -18.926 -11.180  4.00  0.00           C  
ATOM   3257  C   CNT A 208       6.233 -17.800 -10.730  7.00  0.00           C  
ATOM   3258  C   CNT A 208       6.497 -16.574 -11.400  0.00  0.00           C  
ATOM   3259  C   CNT A 208       7.996 -18.696 -12.100  9.00  0.00           C  
ATOM   3260  C   CNT A 208       8.102 -17.529 -12.850  8.00  0.00           C  
ATOM   3261  C   CNT A 208       7.264 -16.536 -12.520  0.00  0.00           C  
ATOM   3262  C   CNT A 208       7.137 -15.449 -13.380  0.00  0.00           C  
ATOM   3263  C   CNT A 208       8.722 -17.527 -14.120  7.00  0.00           C  
ATOM   3264  C   CNT A 208       8.155 -16.728 -15.140  5.00  0.00           C  
ATOM   3265  C   CNT A 208       7.368 -15.634 -14.760  0.00  0.00           C  
ATOM   3266  C   CNT A 208       6.523 -15.027 -15.670  7.00  0.00           C  
ATOM   3267  C   CNT A 208       8.065 -17.205 -16.430  0.00  0.00           C  
ATOM   3268  C   CNT A 208       6.938 -16.907 -17.140  3.00  0.00           C  
ATOM   3269  C   CNT A 208       6.200 -15.801 -16.800  4.00  0.00           C  
ATOM   3270  C   CNT A 208       4.959 -15.481 -17.480  2.00  0.00           C  
ATOM   3271  C   CNT A 208       6.372 -17.776 -18.070  0.00  0.00           C  
ATOM   3272  C   CNT A 208       5.016 -17.695 -18.460  7.00  0.00           C  
ATOM   3273  C   CNT A 208       4.252 -16.520 -18.140  4.00  0.00           C  
ATOM   3274  C   CNT A 208       2.882 -16.579 -18.090  1.00  0.00           C  
ATOM   3275  C   CNT A 208       4.358 -18.896 -18.840  0.00  0.00           C  
ATOM   3276  C   CNT A 208       3.032 -18.976 -18.380  7.00  0.00           C  
ATOM   3277  C   CNT A 208       2.298 -17.840 -17.980  5.00  0.00           C  
ATOM   3278  C   CNT A 208       1.194 -18.033 -17.060  4.00  0.00           C  
ATOM   3279  C   CNT A 208       2.676 -20.242 -17.860  3.00  0.00           C  
ATOM   3280  C   CNT A 208       1.938 -20.304 -16.700  5.00  0.00           C  
ATOM   3281  C   CNT A 208       1.240 -19.180 -16.250  8.00  0.00           C  
ATOM   3282  C   CNT A 208       0.660 -19.117 -14.960  0.00  0.00           C  
ATOM   3283  C   CNT A 208       2.044 -21.407 -15.790  3.00  0.00           C  
ATOM   3284  C   CNT A 208       1.922 -21.088 -14.440  6.00  0.00           C  
ATOM   3285  C   CNT A 208       1.212 -19.973 -14.020  7.00  0.00           C  
ATOM   3286  C   CNT A 208       1.205 -19.644 -12.640  9.00  0.00           C  
ATOM   3287  C   CNT A 208       2.813 -21.694 -13.580  1.00  0.00           C  
ATOM   3288  C   CNT A 208       3.062 -21.113 -12.350  3.00  0.00           C  
ATOM   3289  C   CNT A 208       2.318 -20.035 -11.950  8.00  0.00           C  
ATOM   3290  C   CNT A 208       2.773 -19.179 -10.900  6.00  0.00           C  
ATOM   3291  C   CNT A 208       2.094 -18.058 -10.460  6.00  0.00           C  
ATOM   3292  C   CNT A 208       2.733 -16.985  -9.820  2.00  0.00           C  
ATOM   3293  C   CNT A 208       1.954 -15.852  -9.480  6.00  0.00           C  
ATOM   3294  C   CNT A 208       2.597 -14.652  -9.310  1.00  0.00           C  
ATOM   3295  C   CNT A 208       4.164 -16.822  -9.860  6.00  0.00           C  
ATOM   3296  C   CNT A 208       4.675 -15.538 -10.130  4.00  0.00           C  
ATOM   3297  C   CNT A 208       3.935 -14.447  -9.720  4.00  0.00           C  
ATOM   3298  C   CNT A 208       4.375 -13.175 -10.150  2.00  0.00           C  
ATOM   3299  C   CNT A 208       5.772 -15.450 -10.970  8.00  0.00           C  
ATOM   3300  C   CNT A 208       5.787 -14.259 -11.710  1.00  0.00           C  
ATOM   3301  C   CNT A 208       5.078 -13.127 -11.360  2.00  0.00           C  
ATOM   3302  C   CNT A 208       4.834 -12.103 -12.210  2.00  0.00           C  
ATOM   3303  C   CNT A 208       6.270 -14.435 -13.030  2.00  0.00           C  
ATOM   3304  C   CNT A 208       5.707 -13.562 -13.970  5.00  0.00           C  
ATOM   3305  C   CNT A 208       5.071 -12.366 -13.550  9.00  0.00           C  
ATOM   3306  C   CNT A 208       4.314 -11.719 -14.510  5.00  0.00           C  
ATOM   3307  C   CNT A 208       5.845 -13.880 -15.310  4.00  0.00           C  
ATOM   3308  C   CNT A 208       4.775 -13.488 -16.160  1.00  0.00           C  
ATOM   3309  C   CNT A 208       4.057 -12.303 -15.780  4.00  0.00           C  
ATOM   3310  C   CNT A 208       2.772 -12.074 -16.320  6.00  0.00           C  
ATOM   3311  C   CNT A 208       4.199 -14.359 -17.070  4.00  0.00           C  
ATOM   3312  C   CNT A 208       2.847 -14.265 -17.400  7.00  0.00           C  
ATOM   3313  C   CNT A 208       2.140 -13.102 -17.000  2.00  0.00           C  
ATOM   3314  C   CNT A 208       0.704 -13.197 -16.960  6.00  0.00           C  
ATOM   3315  C   CNT A 208       2.172 -15.457 -17.760  4.00  0.00           C  
ATOM   3316  C   CNT A 208       0.878 -15.635 -17.170  9.00  0.00           C  
ATOM   3317  C   CNT A 208       0.174 -14.486 -16.840  6.00  0.00           C  
ATOM   3318  C   CNT A 208      -0.895 -14.618 -15.900  8.00  0.00           C  
ATOM   3319  C   CNT A 208       0.462 -16.877 -16.660  4.00  0.00           C  
ATOM   3320  C   CNT A 208      -0.298 -16.883 -15.490  6.00  0.00           C  
ATOM   3321  C   CNT A 208      -0.988 -15.768 -15.100  3.00  0.00           C  
ATOM   3322  C   CNT A 208      -1.447 -15.742 -13.800  8.00  0.00           C  
ATOM   3323  C   CNT A 208      -0.039 -17.928 -14.570  8.00  0.00           C  
ATOM   3324  C   CNT A 208      -0.260 -17.738 -13.170  8.00  0.00           C  
ATOM   3325  C   CNT A 208      -0.995 -16.605 -12.790  8.00  0.00           C  
ATOM   3326  C   CNT A 208      -1.108 -16.288 -11.420  7.00  0.00           C  
ATOM   3327  C   CNT A 208       0.511 -18.451 -12.240  8.00  0.00           C  
ATOM   3328  C   CNT A 208       0.815 -17.848 -11.010  7.00  0.00           C  
ATOM   3329  C   CNT A 208       0.065 -16.711 -10.660  0.00  0.00           C  
ATOM   3330  C   CNT A 208       0.529 -15.822  -9.670  9.00  0.00           C  
ATOM   3331  C   CNT A 208      -0.241 -14.698  -9.380  0.00  0.00           C  
ATOM   3332  C   CNT A 208       0.448 -13.553  -8.850  2.00  0.00           C  
ATOM   3333  C   CNT A 208      -0.312 -12.468  -8.280  9.00  0.00           C  
ATOM   3334  C   CNT A 208       0.356 -11.237  -8.200  3.00  0.00           C  
ATOM   3335  C   CNT A 208       1.827 -13.480  -9.010  7.00  0.00           C  
ATOM   3336  C   CNT A 208       2.450 -12.224  -8.920  9.00  0.00           C  
ATOM   3337  C   CNT A 208       1.671 -11.115  -8.660  5.00  0.00           C  
ATOM   3338  C   CNT A 208       2.033  -9.813  -9.020  5.00  0.00           C  
ATOM   3339  C   CNT A 208       3.621 -12.058  -9.680  9.00  0.00           C  
ATOM   3340  C   CNT A 208       3.655 -10.892 -10.530  7.00  0.00           C  
ATOM   3341  C   CNT A 208       2.941  -9.720 -10.130  1.00  0.00           C  
ATOM   3342  C   CNT A 208       2.759  -8.646 -11.030  4.00  0.00           C  
ATOM   3343  C   CNT A 208       4.217 -10.945 -11.810  8.00  0.00           C  
ATOM   3344  C   CNT A 208       3.698 -10.064 -12.820  0.00  0.00           C  
ATOM   3345  C   CNT A 208       3.078  -8.844 -12.420  5.00  0.00           C  
ATOM   3346  C   CNT A 208       2.232  -8.216 -13.370  3.00  0.00           C  
ATOM   3347  C   CNT A 208       3.682 -10.519 -14.130  4.00  0.00           C  
ATOM   3348  C   CNT A 208       2.628 -10.030 -14.950  8.00  0.00           C  
ATOM   3349  C   CNT A 208       1.922  -8.871 -14.570  8.00  0.00           C  
ATOM   3350  C   CNT A 208       0.623  -8.726 -15.110  5.00  0.00           C  
ATOM   3351  C   CNT A 208       2.061 -10.914 -15.860  8.00  0.00           C  
ATOM   3352  C   CNT A 208       0.664 -10.908 -16.100  4.00  0.00           C  
ATOM   3353  C   CNT A 208      -0.004  -9.767 -15.730  6.00  0.00           C  
ATOM   3354  C   CNT A 208      -1.377  -9.855 -15.680  9.00  0.00           C  
ATOM   3355  C   CNT A 208       0.031 -12.100 -16.420  1.00  0.00           C  
ATOM   3356  C   CNT A 208      -1.296 -12.286 -15.980  7.00  0.00           C  
ATOM   3357  C   CNT A 208      -1.980 -11.160 -15.520  2.00  0.00           C  
ATOM   3358  C   CNT A 208      -3.039 -11.292 -14.640  6.00  0.00           C  
ATOM   3359  C   CNT A 208      -1.691 -13.529 -15.520  3.00  0.00           C  
ATOM   3360  C   CNT A 208      -2.389 -13.630 -14.330  8.00  0.00           C  
ATOM   3361  C   CNT A 208      -3.205 -12.480 -13.960  6.00  0.00           C  
ATOM   3362  C   CNT A 208      -3.785 -12.472 -12.680  9.00  0.00           C  
ATOM   3363  C   CNT A 208      -2.147 -14.592 -13.390  0.00  0.00           C  
ATOM   3364  C   CNT A 208      -2.441 -14.376 -12.070  4.00  0.00           C  
ATOM   3365  C   CNT A 208      -3.212 -13.296 -11.690  3.00  0.00           C  
ATOM   3366  C   CNT A 208      -3.212 -12.861 -10.410  5.00  0.00           C  
ATOM   3367  C   CNT A 208      -1.882 -15.163 -11.040  8.00  0.00           C  
ATOM   3368  C   CNT A 208      -1.571 -14.539  -9.820  0.00  0.00           C  
ATOM   3369  C   CNT A 208      -2.198 -13.333  -9.560  6.00  0.00           C  
ATOM   3370  C   CNT A 208      -1.654 -12.369  -8.640  1.00  0.00           C  
ATOM   3371  C   CNT A 208      -2.458 -11.281  -8.250  6.00  0.00           C  
ATOM   3372  C   CNT A 208      -1.821 -10.226  -7.590  4.00  0.00           C  
ATOM   3373  C   CNT A 208      -2.602  -9.131  -7.210  3.00  0.00           C  
ATOM   3374  C   CNT A 208      -1.878  -7.907  -6.970  4.00  0.00           C  
ATOM   3375  C   CNT A 208      -0.412 -10.125  -7.690  8.00  0.00           C  
ATOM   3376  C   CNT A 208       0.122  -8.860  -7.930  1.00  0.00           C  
ATOM   3377  C   CNT A 208      -0.616  -7.777  -7.490  2.00  0.00           C  
ATOM   3378  C   CNT A 208      -0.131  -6.496  -7.790  5.00  0.00           C  
ATOM   3379  C   CNT A 208       1.232  -8.713  -8.700  9.00  0.00           C  
ATOM   3380  C   CNT A 208       1.407  -7.540  -9.400  1.00  0.00           C  
ATOM   3381  C   CNT A 208       0.793  -6.396  -8.900  1.00  0.00           C  
ATOM   3382  C   CNT A 208       0.620  -5.402  -9.870  9.00  0.00           C  
ATOM   3383  C   CNT A 208       1.994  -7.575 -10.640  2.00  0.00           C  
ATOM   3384  C   CNT A 208       1.627  -6.666 -11.630  5.00  0.00           C  
ATOM   3385  C   CNT A 208       0.869  -5.570 -11.210  9.00  0.00           C  
ATOM   3386  C   CNT A 208       0.082  -4.875 -12.180  2.00  0.00           C  
ATOM   3387  C   CNT A 208       1.494  -7.109 -12.960  3.00  0.00           C  
ATOM   3388  C   CNT A 208       0.457  -6.681 -13.820  4.00  0.00           C  
ATOM   3389  C   CNT A 208      -0.239  -5.523 -13.410  4.00  0.00           C  
ATOM   3390  C   CNT A 208      -1.474  -5.330 -14.030  6.00  0.00           C  
ATOM   3391  C   CNT A 208      -0.079  -7.582 -14.720  7.00  0.00           C  
ATOM   3392  C   CNT A 208      -1.441  -7.487 -15.040  1.00  0.00           C  
ATOM   3393  C   CNT A 208      -2.145  -6.345 -14.700  1.00  0.00           C  
ATOM   3394  C   CNT A 208      -3.554  -6.485 -14.590  0.00  0.00           C  
ATOM   3395  C   CNT A 208      -2.065  -8.725 -15.280  2.00  0.00           C  
ATOM   3396  C   CNT A 208      -3.331  -8.935 -14.660  0.00  0.00           C  
ATOM   3397  C   CNT A 208      -4.091  -7.759 -14.390  1.00  0.00           C  
ATOM   3398  C   CNT A 208      -5.172  -7.915 -13.510  0.00  0.00           C  
ATOM   3399  C   CNT A 208      -3.731 -10.179 -14.170  5.00  0.00           C  
ATOM   3400  C   CNT A 208      -4.597 -10.262 -13.080  1.00  0.00           C  
ATOM   3401  C   CNT A 208      -5.254  -9.081 -12.720  4.00  0.00           C  
ATOM   3402  C   CNT A 208      -5.909  -9.034 -11.490  0.00  0.00           C  
ATOM   3403  C   CNT A 208      -4.588 -11.393 -12.280  1.00  0.00           C  
ATOM   3404  C   CNT A 208      -4.882 -11.136 -10.940  0.00  0.00           C  
ATOM   3405  C   CNT A 208      -5.539  -9.979 -10.560  1.00  0.00           C  
ATOM   3406  C   CNT A 208      -5.535  -9.609  -9.210  9.00  0.00           C  
ATOM   3407  C   CNT A 208      -4.071 -11.807  -9.990  0.00  0.00           C  
ATOM   3408  C   CNT A 208      -3.705 -11.122  -8.820  5.00  0.00           C  
ATOM   3409  C   CNT A 208      -4.505 -10.022  -8.400  4.00  0.00           C  
ATOM   3410  C   CNT A 208      -3.908  -9.061  -7.570  0.00  0.00           C  
ATOM   3411  C   CNT A 208      -4.626  -7.923  -7.200  8.00  0.00           C  
ATOM   3412  C   CNT A 208      -4.014  -6.867  -6.490  8.00  0.00           C  
ATOM   3413  C   CNT A 208      -4.734  -5.791  -6.130  6.00  0.00           C  
ATOM   3414  C   CNT A 208      -4.115  -4.544  -5.870  1.00  0.00           C  
ATOM   3415  C   CNT A 208      -2.563  -6.799  -6.490  7.00  0.00           C  
ATOM   3416  C   CNT A 208      -2.040  -5.539  -6.680  5.00  0.00           C  
ATOM   3417  C   CNT A 208      -2.779  -4.434  -6.360  8.00  0.00           C  
ATOM   3418  C   CNT A 208      -2.294  -3.093  -6.730  8.00  0.00           C  
ATOM   3419  C   CNT A 208      -0.912  -5.374  -7.520  0.00  0.00           C  
ATOM   3420  C   CNT A 208      -0.778  -4.168  -8.260  2.00  0.00           C  
ATOM   3421  C   CNT A 208      -1.456  -3.015  -7.830  7.00  0.00           C  
ATOM   3422  C   CNT A 208      -1.669  -2.018  -8.770  0.00  0.00           C  
ATOM   3423  C   CNT A 208      -0.137  -4.216  -9.510  4.00  0.00           C  
ATOM   3424  C   CNT A 208      -0.522  -3.298 -10.510  9.00  0.00           C  
ATOM   3425  C   CNT A 208      -1.335  -2.206 -10.170  5.00  0.00           C  
ATOM   3426  C   CNT A 208      -2.162  -1.531 -11.030  5.00  0.00           C  
ATOM   3427  C   CNT A 208      -0.612  -3.718 -11.870  9.00  0.00           C  
ATOM   3428  C   CNT A 208      -1.682  -3.320 -12.670  7.00  0.00           C  
ATOM   3429  C   CNT A 208      -2.443  -2.188 -12.310  4.00  0.00           C  
ATOM   3430  C   CNT A 208      -3.709  -1.926 -12.900  8.00  0.00           C  
ATOM   3431  C   CNT A 208      -2.240  -4.244 -13.560  2.00  0.00           C  
ATOM   3432  C   CNT A 208      -3.601  -4.170 -13.790  5.00  0.00           C  
ATOM   3433  C   CNT A 208      -4.374  -2.998 -13.490  8.00  0.00           C  
ATOM   3434  C   CNT A 208      -5.752  -3.160 -13.250  6.00  0.00           C  
ATOM   3435  C   CNT A 208      -4.291  -5.365 -14.130  2.00  0.00           C  
ATOM   3436  C   CNT A 208      -5.608  -5.566 -13.670  0.00  0.00           C  
ATOM   3437  C   CNT A 208      -6.367  -4.422 -13.240  0.00  0.00           C  
ATOM   3438  C   CNT A 208      -7.476  -4.634 -12.340  3.00  0.00           C  
ATOM   3439  C   CNT A 208      -5.993  -6.829 -13.160  2.00  0.00           C  
ATOM   3440  C   CNT A 208      -6.879  -6.919 -12.060  5.00  0.00           C  
ATOM   3441  C   CNT A 208      -7.640  -5.830 -11.630  4.00  0.00           C  
ATOM   3442  C   CNT A 208      -8.343  -5.825 -10.410  3.00  0.00           C  
ATOM   3443  C   CNT A 208      -6.733  -7.984 -11.170  4.00  0.00           C  
ATOM   3444  C   CNT A 208      -7.032  -7.797  -9.800  3.00  0.00           C  
ATOM   3445  C   CNT A 208      -7.808  -6.687  -9.400  5.00  0.00           C  
ATOM   3446  C   CNT A 208      -7.780  -6.267  -8.070  5.00  0.00           C  
ATOM   3447  C   CNT A 208      -6.307  -8.523  -8.780  2.00  0.00           C  
ATOM   3448  C   CNT A 208      -5.970  -7.796  -7.610  5.00  0.00           C  
ATOM   3449  C   CNT A 208      -6.672  -6.647  -7.250  7.00  0.00           C  
ATOM   3450  C   CNT A 208      -6.129  -5.782  -6.350  4.00  0.00           C  
ATOM   3451  C   CNT A 208      -6.875  -4.677  -5.870  9.00  0.00           C  
ATOM   3452  C   CNT A 208      -6.277  -3.561  -5.330  2.00  0.00           C  
ATOM   3453  C   CNT A 208      -6.998  -2.504  -4.890  9.00  0.00           C  
ATOM   3454  C   CNT A 208      -6.246  -1.225  -4.680  8.00  0.00           C  
ATOM   3455  C   CNT A 208      -4.860  -3.433  -5.470  5.00  0.00           C  
ATOM   3456  C   CNT A 208      -4.237  -2.211  -5.520  4.00  0.00           C  
ATOM   3457  C   CNT A 208      -4.957  -1.055  -5.160  6.00  0.00           C  
ATOM   3458  C   CNT A 208      -4.529   0.200  -5.580  3.00  0.00           C  
ATOM   3459  C   CNT A 208      -3.119  -2.062  -6.390  5.00  0.00           C  
ATOM   3460  C   CNT A 208      -3.027  -0.881  -7.120  7.00  0.00           C  
ATOM   3461  C   CNT A 208      -3.623   0.284  -6.660  4.00  0.00           C  
ATOM   3462  C   CNT A 208      -3.722   1.405  -7.500  0.00  0.00           C  
ATOM   3463  C   CNT A 208      -2.345  -0.833  -8.360  1.00  0.00           C  
ATOM   3464  C   CNT A 208      -2.792   0.060  -9.320  9.00  0.00           C  
ATOM   3465  C   CNT A 208      -3.540   1.129  -8.900  4.00  0.00           C  
ATOM   3466  C   CNT A 208      -4.347   1.790  -9.800  2.00  0.00           C  
ATOM   3467  C   CNT A 208      -2.834  -0.356 -10.660  7.00  0.00           C  
ATOM   3468  C   CNT A 208      -3.900   0.060 -11.530  5.00  0.00           C  
ATOM   3469  C   CNT A 208      -4.626   1.169 -11.090  8.00  0.00           C  
ATOM   3470  C   CNT A 208      -5.919   1.418 -11.640  3.00  0.00           C  
ATOM   3471  C   CNT A 208      -4.438  -0.844 -12.450  6.00  0.00           C  
ATOM   3472  C   CNT A 208      -5.815  -0.803 -12.680  7.00  0.00           C  
ATOM   3473  C   CNT A 208      -6.524   0.319 -12.270  7.00  0.00           C  
ATOM   3474  C   CNT A 208      -7.927   0.212 -12.200  0.00  0.00           C  
ATOM   3475  C   CNT A 208      -6.499  -2.002 -12.940  2.00  0.00           C  
ATOM   3476  C   CNT A 208      -7.783  -2.233 -12.440  5.00  0.00           C  
ATOM   3477  C   CNT A 208      -8.483  -1.094 -12.000  3.00  0.00           C  
ATOM   3478  C   CNT A 208      -9.590  -1.269 -11.230  1.00  0.00           C  
ATOM   3479  C   CNT A 208      -8.252  -3.529 -11.990  1.00  0.00           C  
ATOM   3480  C   CNT A 208      -9.107  -3.576 -10.840  6.00  0.00           C  
ATOM   3481  C   CNT A 208      -9.748  -2.447 -10.460  8.00  0.00           C  
ATOM   3482  C   CNT A 208     -10.375  -2.384  -9.190  1.00  0.00           C  
ATOM   3483  C   CNT A 208      -9.100  -4.703 -10.010  4.00  0.00           C  
ATOM   3484  C   CNT A 208      -9.299  -4.492  -8.610  2.00  0.00           C  
ATOM   3485  C   CNT A 208     -10.040  -3.345  -8.190  5.00  0.00           C  
ATOM   3486  C   CNT A 208      -9.915  -2.877  -6.900  9.00  0.00           C  
ATOM   3487  C   CNT A 208      -8.529  -5.138  -7.670  3.00  0.00           C  
ATOM   3488  C   CNT A 208      -8.189  -4.563  -6.430  3.00  0.00           C  
ATOM   3489  C   CNT A 208      -8.942  -3.369  -6.000  9.00  0.00           C  
ATOM   3490  C   CNT A 208      -8.357  -2.465  -5.140  6.00  0.00           C  
ATOM   3491  C   CNT A 208      -9.070  -1.356  -4.700  7.00  0.00           C  
ATOM   3492  C   CNT A 208      -8.376  -0.251  -4.150  7.00  0.00           C  
ATOM   3493  C   CNT A 208      -9.095   0.920  -3.820  8.00  0.00           C  
ATOM   3494  C   CNT A 208      -8.387   2.070  -3.360  7.00  0.00           C  
ATOM   3495  C   CNT A 208      -6.980  -0.116  -4.290  4.00  0.00           C  
ATOM   3496  C   CNT A 208      -6.407   1.149  -4.390  7.00  0.00           C  
ATOM   3497  C   CNT A 208      -7.144   2.291  -4.030  6.00  0.00           C  
ATOM   3498  C   CNT A 208      -6.752   3.571  -4.410  5.00  0.00           C  
ATOM   3499  C   CNT A 208      -5.312   1.278  -5.210  0.00  0.00           C  
ATOM   3500  C   CNT A 208      -5.138   2.518  -5.800  2.00  0.00           C  
ATOM   3501  C   CNT A 208      -5.794   3.692  -5.450  0.00  0.00           C  
ATOM   3502  C   CNT A 208      -6.003   4.740  -6.340  5.00  0.00           C  
ATOM   3503  C   CNT A 208      -4.433   2.531  -7.070  1.00  0.00           C  
ATOM   3504  C   CNT A 208      -5.096   3.356  -8.090  4.00  0.00           C  
ATOM   3505  C   CNT A 208      -5.765   4.511  -7.690  8.00  0.00           C  
ATOM   3506  C   CNT A 208      -6.595   5.171  -8.630  7.00  0.00           C  
ATOM   3507  C   CNT A 208      -5.171   2.841  -9.360  6.00  0.00           C  
ATOM   3508  C   CNT A 208      -6.135   3.370 -10.220  9.00  0.00           C  
ATOM   3509  C   CNT A 208      -6.912   4.437  -9.760  3.00  0.00           C  
ATOM   3510  C   CNT A 208      -8.141   4.717 -10.350  1.00  0.00           C  
ATOM   3511  C   CNT A 208      -6.639   2.527 -11.280  6.00  0.00           C  
ATOM   3512  C   CNT A 208      -8.022   2.593 -11.520  0.00  0.00           C  
ATOM   3513  C   CNT A 208      -8.791   3.629 -10.980  7.00  0.00           C  
ATOM   3514  C   CNT A 208     -10.186   3.571 -10.930  8.00  0.00           C  
ATOM   3515  C   CNT A 208      -8.690   1.396 -11.760  2.00  0.00           C  
ATOM   3516  C   CNT A 208      -9.934   1.164 -11.180  8.00  0.00           C  
ATOM   3517  C   CNT A 208     -10.775   2.285 -10.820  5.00  0.00           C  
ATOM   3518  C   CNT A 208     -11.852   2.163  -9.970  8.00  0.00           C  
ATOM   3519  C   CNT A 208     -10.415  -0.128 -10.800  7.00  0.00           C  
ATOM   3520  C   CNT A 208     -11.204  -0.234  -9.630  7.00  0.00           C  
ATOM   3521  C   CNT A 208     -12.016   0.904  -9.280  5.00  0.00           C  
ATOM   3522  C   CNT A 208     -12.666   0.926  -8.010  8.00  0.00           C  
ATOM   3523  C   CNT A 208     -11.151  -1.329  -8.780  4.00  0.00           C  
ATOM   3524  C   CNT A 208     -11.500  -1.119  -7.350  4.00  0.00           C  
ATOM   3525  C   CNT A 208     -12.222  -0.010  -7.040  4.00  0.00           C  
ATOM   3526  C   CNT A 208     -12.185   0.429  -5.700  5.00  0.00           C  
ATOM   3527  C   CNT A 208     -10.718  -1.832  -6.410  2.00  0.00           C  
ATOM   3528  C   CNT A 208     -10.343  -1.149  -5.200  2.00  0.00           C  
ATOM   3529  C   CNT A 208     -11.060   0.045  -4.930  9.00  0.00           C  
ATOM   3530  C   CNT A 208     -10.483   0.969  -3.980  8.00  0.00           C  
ATOM   3531  C   CNT A 208     -11.241   2.129  -3.570  2.00  0.00           C  
ATOM   3532  C   CNT A 208     -10.556   3.123  -2.860  9.00  0.00           C  
ATOM   3533  C   CNT A 208     -11.326   4.199  -2.480  4.00  0.00           C  
ATOM   3534  C   CNT A 208     -10.633   5.415  -2.220  0.00  0.00           C  
ATOM   3535  C   CNT A 208      -9.160   3.230  -3.080  6.00  0.00           C  
ATOM   3536  C   CNT A 208      -8.554   4.511  -3.160  1.00  0.00           C  
ATOM   3537  C   CNT A 208      -9.321   5.584  -2.690  3.00  0.00           C  
ATOM   3538  C   CNT A 208      -8.874   6.855  -3.080  4.00  0.00           C  
ATOM   3539  C   CNT A 208      -7.507   4.702  -4.000  5.00  0.00           C  
ATOM   3540  C   CNT A 208      -7.310   5.932  -4.660  6.00  0.00           C  
ATOM   3541  C   CNT A 208      -8.028   7.025  -4.220  8.00  0.00           C  
ATOM   3542  C   CNT A 208      -8.119   8.074  -5.120  4.00  0.00           C  
ATOM   3543  C   CNT A 208      -6.608   5.928  -5.930  3.00  0.00           C  
ATOM   3544  C   CNT A 208      -7.202   6.778  -6.920  6.00  0.00           C  
ATOM   3545  C   CNT A 208      -7.849   7.917  -6.480  8.00  0.00           C  
ATOM   3546  C   CNT A 208      -8.785   8.462  -7.400  9.00  0.00           C  
ATOM   3547  C   CNT A 208      -7.302   6.283  -8.210  5.00  0.00           C  
ATOM   3548  C   CNT A 208      -8.412   6.672  -8.970  8.00  0.00           C  
ATOM   3549  C   CNT A 208      -9.137   7.759  -8.590  4.00  0.00           C  
ATOM   3550  C   CNT A 208     -10.431   8.035  -9.170  2.00  0.00           C  
ATOM   3551  C   CNT A 208      -8.951   5.812  -9.910  1.00  0.00           C  
ATOM   3552  C   CNT A 208     -10.307   5.889 -10.260  2.00  0.00           C  
ATOM   3553  C   CNT A 208     -11.059   6.979  -9.820  8.00  0.00           C  
ATOM   3554  C   CNT A 208     -12.436   6.922  -9.750  9.00  0.00           C  
ATOM   3555  C   CNT A 208     -10.929   4.703 -10.620  1.00  0.00           C  
ATOM   3556  C   CNT A 208     -12.302   4.526 -10.130  7.00  0.00           C  
ATOM   3557  C   CNT A 208     -13.016   5.624  -9.640  2.00  0.00           C  
ATOM   3558  C   CNT A 208     -14.148   5.472  -8.880  5.00  0.00           C  
ATOM   3559  C   CNT A 208     -12.669   3.247  -9.650  4.00  0.00           C  
ATOM   3560  C   CNT A 208     -13.492   3.175  -8.520  1.00  0.00           C  
ATOM   3561  C   CNT A 208     -14.263   4.254  -8.130  7.00  0.00           C  
ATOM   3562  C   CNT A 208     -14.961   4.273  -6.930  4.00  0.00           C  
ATOM   3563  C   CNT A 208     -13.412   2.076  -7.630  4.00  0.00           C  
ATOM   3564  C   CNT A 208     -13.709   2.287  -6.300  0.00  0.00           C  
ATOM   3565  C   CNT A 208     -14.463   3.392  -5.890  7.00  0.00           C  
ATOM   3566  C   CNT A 208     -14.319   3.903  -4.590  1.00  0.00           C  
ATOM   3567  C   CNT A 208     -12.882   1.629  -5.350  4.00  0.00           C  
ATOM   3568  C   CNT A 208     -12.522   2.295  -4.190  0.00  0.00           C  
ATOM   3569  C   CNT A 208     -13.216   3.511  -3.800  4.00  0.00           C  
ATOM   3570  C   CNT A 208     -12.673   4.366  -2.860  1.00  0.00           C  
ATOM   3571  C   CNT A 208     -13.405   5.453  -2.420  9.00  0.00           C  
ATOM   3572  C   CNT A 208     -12.768   6.536  -1.770  0.00  0.00           C  
ATOM   3573  C   CNT A 208     -13.587   7.566  -1.230  4.00  0.00           C  
ATOM   3574  C   CNT A 208     -12.874   8.805  -1.040  7.00  0.00           C  
ATOM   3575  C   CNT A 208     -11.354   6.552  -1.750  4.00  0.00           C  
ATOM   3576  C   CNT A 208     -10.732   7.821  -1.790  2.00  0.00           C  
ATOM   3577  C   CNT A 208     -11.583   8.988  -1.500  6.00  0.00           C  
ATOM   3578  C   CNT A 208     -11.198  10.222  -2.040  5.00  0.00           C  
ATOM   3579  C   CNT A 208      -9.606   8.002  -2.660  0.00  0.00           C  
ATOM   3580  C   CNT A 208      -9.456   9.189  -3.430  1.00  0.00           C  
ATOM   3581  C   CNT A 208     -10.366  10.236  -3.150  5.00  0.00           C  
ATOM   3582  C   CNT A 208     -10.368  11.398  -3.960  0.00  0.00           C  
ATOM   3583  C   CNT A 208      -8.888   9.201  -4.700  4.00  0.00           C  
ATOM   3584  C   CNT A 208      -9.421  10.032  -5.710  6.00  0.00           C  
ATOM   3585  C   CNT A 208     -10.169  11.161  -5.290  7.00  0.00           C  
ATOM   3586  C   CNT A 208     -10.948  11.843  -6.210  6.00  0.00           C  
ATOM   3587  C   CNT A 208      -9.518   9.572  -7.010  8.00  0.00           C  
ATOM   3588  C   CNT A 208     -10.572  10.024  -7.780  8.00  0.00           C  
ATOM   3589  C   CNT A 208     -11.326  11.113  -7.370  4.00  0.00           C  
ATOM   3590  C   CNT A 208     -12.561  11.384  -7.990  9.00  0.00           C  
ATOM   3591  C   CNT A 208     -11.095   9.197  -8.830  3.00  0.00           C  
ATOM   3592  C   CNT A 208     -12.503   9.221  -9.020  9.00  0.00           C  
ATOM   3593  C   CNT A 208     -13.252  10.376  -8.730  4.00  0.00           C  
ATOM   3594  C   CNT A 208     -14.672  10.277  -8.680  6.00  0.00           C  
ATOM   3595  C   CNT A 208     -13.160   8.036  -9.350  6.00  0.00           C  
ATOM   3596  C   CNT A 208     -14.449   7.857  -8.870  6.00  0.00           C  
ATOM   3597  C   CNT A 208     -15.241   8.982  -8.580  4.00  0.00           C  
ATOM   3598  C   CNT A 208     -16.418   8.841  -7.830  9.00  0.00           C  
ATOM   3599  C   CNT A 208     -14.896   6.600  -8.500  3.00  0.00           C  
ATOM   3600  C   CNT A 208     -15.830   6.510  -7.450  1.00  0.00           C  
ATOM   3601  C   CNT A 208     -16.534   7.658  -7.120  1.00  0.00           C  
ATOM   3602  C   CNT A 208     -17.001   7.740  -5.770  0.00  0.00           C  
ATOM   3603  C   CNT A 208     -15.626   5.466  -6.490  2.00  0.00           C  
ATOM   3604  C   CNT A 208     -15.871   5.671  -5.110  5.00  0.00           C  
ATOM   3605  C   CNT A 208     -16.562   6.846  -4.770  8.00  0.00           C  
ATOM   3606  C   CNT A 208     -16.508   7.304  -3.420  7.00  0.00           C  
ATOM   3607  C   CNT A 208     -15.043   5.046  -4.150  8.00  0.00           C  
ATOM   3608  C   CNT A 208     -14.664   5.703  -3.000  1.00  0.00           C  
ATOM   3609  C   CNT A 208     -15.447   6.855  -2.610  3.00  0.00           C  
ATOM   3610  C   CNT A 208     -14.977   7.645  -1.590  4.00  0.00           C  
ATOM   3611  C   CNT A 208     -15.702   8.789  -1.160  3.00  0.00           C  
ATOM   3612  C   CNT A 208     -15.063   9.884  -0.560  7.00  0.00           C  
ATOM   3613  C   CNT A 208     -15.704  11.086  -0.250  5.00  0.00           C  
ATOM   3614  C   CNT A 208     -15.004  12.330  -0.010  5.00  0.00           C  
ATOM   3615  C   CNT A 208     -13.648   9.980  -0.760  5.00  0.00           C  
ATOM   3616  C   CNT A 208     -13.011  11.232  -0.810  6.00  0.00           C  
ATOM   3617  C   CNT A 208     -13.717  12.439  -0.540  6.00  0.00           C  
ATOM   3618  C   CNT A 208     -13.237  13.712  -0.830  3.00  0.00           C  
ATOM   3619  C   CNT A 208     -11.904  11.403  -1.650  1.00  0.00           C  
ATOM   3620  C   CNT A 208     -11.708  12.618  -2.310  4.00  0.00           C  
ATOM   3621  C   CNT A 208     -12.359  13.763  -1.920  1.00  0.00           C  
ATOM   3622  C   CNT A 208     -12.554  14.844  -2.840  4.00  0.00           C  
ATOM   3623  C   CNT A 208     -11.127  12.546  -3.540  2.00  0.00           C  
ATOM   3624  C   CNT A 208     -11.617  13.357  -4.510  1.00  0.00           C  
ATOM   3625  C   CNT A 208     -12.352  14.521  -4.160  6.00  0.00           C  
ATOM   3626  C   CNT A 208     -13.074  15.253  -5.100  1.00  0.00           C  
ATOM   3627  C   CNT A 208     -11.714  12.935  -5.840  7.00  0.00           C  
ATOM   3628  C   CNT A 208     -12.850  13.369  -6.610  8.00  0.00           C  
ATOM   3629  C   CNT A 208     -13.435  14.586  -6.270  9.00  0.00           C  
ATOM   3630  C   CNT A 208     -14.703  14.811  -6.820  4.00  0.00           C  
ATOM   3631  C   CNT A 208     -13.337  12.477  -7.560  8.00  0.00           C  
ATOM   3632  C   CNT A 208     -14.696  12.590  -7.920  1.00  0.00           C  
ATOM   3633  C   CNT A 208     -15.310  13.726  -7.400  0.00  0.00           C  
ATOM   3634  C   CNT A 208     -16.715  13.686  -7.300  3.00  0.00           C  
ATOM   3635  C   CNT A 208     -15.413  11.396  -8.350  0.00  0.00           C  
ATOM   3636  C   CNT A 208     -16.707  11.276  -7.760  1.00  0.00           C  
ATOM   3637  C   CNT A 208     -17.358  12.417  -7.280  4.00  0.00           C  
ATOM   3638  C   CNT A 208     -18.578  12.260  -6.550  3.00  0.00           C  
ATOM   3639  C   CNT A 208     -17.082   9.999  -7.330  2.00  0.00           C  
ATOM   3640  C   CNT A 208     -17.961   9.867  -6.230  9.00  0.00           C  
ATOM   3641  C   CNT A 208     -18.638  11.058  -5.780  4.00  0.00           C  
ATOM   3642  C   CNT A 208     -19.403  11.051  -4.540  1.00  0.00           C  
ATOM   3643  C   CNT A 208     -17.789   8.855  -5.320  5.00  0.00           C  
ATOM   3644  C   CNT A 208     -18.081   9.159  -3.990  0.00  0.00           C  
ATOM   3645  C   CNT A 208     -18.855  10.240  -3.540  7.00  0.00           C  
ATOM   3646  C   CNT A 208     -18.820  10.599  -2.170  1.00  0.00           C  
ATOM   3647  C   CNT A 208     -17.254   8.482  -3.030  5.00  0.00           C  
ATOM   3648  C   CNT A 208     -16.950   9.122  -1.830  3.00  0.00           C  
ATOM   3649  C   CNT A 208     -17.736  10.208  -1.380  8.00  0.00           C  
ATOM   3650  C   CNT A 208     -17.165  11.139  -0.490  3.00  0.00           C  
ATOM   3651  C   CNT A 208     -17.876  12.254  -0.140  7.00  0.00           C  
ATOM   3652  C   CNT A 208     -17.168  13.360   0.380  0.00  0.00           C  
ATOM   3653  C   CNT A 208     -17.886  14.462   0.840  6.00  0.00           C  
ATOM   3654  C   CNT A 208     -17.242  15.685   1.070  9.00  0.00           C  
ATOM   3655  C   CNT A 208     -15.753  13.439   0.340  4.00  0.00           C  
ATOM   3656  C   CNT A 208     -15.174  14.738   0.300  2.00  0.00           C  
ATOM   3657  C   CNT A 208     -15.907  15.828   0.700  0.00  0.00           C  
ATOM   3658  C   CNT A 208     -15.516  17.068   0.270  6.00  0.00           C  
ATOM   3659  C   CNT A 208     -14.003  14.855  -0.460  7.00  0.00           C  
ATOM   3660  C   CNT A 208     -13.841  16.046  -1.210  1.00  0.00           C  
ATOM   3661  C   CNT A 208     -14.606  17.138  -0.770  9.00  0.00           C  
ATOM   3662  C   CNT A 208     -14.661  18.228  -1.680  9.00  0.00           C  
ATOM   3663  C   CNT A 208     -13.259  16.009  -2.470  2.00  0.00           C  
ATOM   3664  C   CNT A 208     -13.671  16.912  -3.440  8.00  0.00           C  
ATOM   3665  C   CNT A 208     -14.418  18.002  -3.060  7.00  0.00           C  
ATOM   3666  C   CNT A 208     -15.207  18.712  -4.010  4.00  0.00           C  
ATOM   3667  C   CNT A 208     -13.713  16.460  -4.760  3.00  0.00           C  
ATOM   3668  C   CNT A 208     -14.817  16.864  -5.500  7.00  0.00           C  
ATOM   3669  C   CNT A 208     -15.559  17.990  -5.130  3.00  0.00           C  
ATOM   3670  C   CNT A 208     -16.836  18.193  -5.680  1.00  0.00           C  
ATOM   3671  C   CNT A 208     -15.422  15.932  -6.410  1.00  0.00           C  
ATOM   3672  C   CNT A 208     -16.827  15.973  -6.580  4.00  0.00           C  
ATOM   3673  C   CNT A 208     -17.522  17.146  -6.270  7.00  0.00           C  
ATOM   3674  C   CNT A 208     -18.903  17.019  -6.140  5.00  0.00           C  
ATOM   3675  C   CNT A 208     -17.474  14.765  -6.800  0.00  0.00           C  
ATOM   3676  C   CNT A 208     -18.773  14.607  -6.370  1.00  0.00           C  
ATOM   3677  C   CNT A 208     -19.510  15.757  -5.990  9.00  0.00           C  
ATOM   3678  C   CNT A 208     -20.777  15.580  -5.390  0.00  0.00           C  
ATOM   3679  C   CNT A 208     -19.288  13.389  -6.030  7.00  0.00           C  
ATOM   3680  C   CNT A 208     -20.300  13.252  -5.020  6.00  0.00           C  
ATOM   3681  C   CNT A 208     -21.041  14.382  -4.660  2.00  0.00           C  
ATOM   3682  C   CNT A 208     -21.621  14.443  -3.370  1.00  0.00           C  
ATOM   3683  C   CNT A 208     -20.181  12.156  -4.130  4.00  0.00           C  
ATOM   3684  C   CNT A 208     -20.304  12.431  -2.740  4.00  0.00           C  
ATOM   3685  C   CNT A 208     -21.050  13.570  -2.420  7.00  0.00           C  
ATOM   3686  C   CNT A 208     -20.947  14.037  -1.080  7.00  0.00           C  
ATOM   3687  C   CNT A 208     -19.609  11.745  -1.760  8.00  0.00           C  
ATOM   3688  C   CNT A 208     -19.192  12.417  -0.580  7.00  0.00           C  
ATOM   3689  C   CNT A 208     -19.876  13.600  -0.250  0.00  0.00           C  
ATOM   3690  C   CNT A 208     -19.278  14.507   0.620  5.00  0.00           C  
ATOM   3691  C   CNT A 208     -20.010  15.654   1.020  3.00  0.00           C  
ATOM   3692  C   CNT A 208     -19.344  16.632   1.750  6.00  0.00           C  
ATOM   3693  C   CNT A 208     -20.071  17.696   2.200  4.00  0.00           C  
ATOM   3694  C   CNT A 208     -19.368  18.971   2.380  6.00  0.00           C  
ATOM   3695  C   CNT A 208     -17.963  16.784   1.620  7.00  0.00           C  
ATOM   3696  C   CNT A 208     -17.320  18.030   1.560  6.00  0.00           C  
ATOM   3697  C   CNT A 208     -18.059  19.174   1.860  2.00  0.00           C  
ATOM   3698  C   CNT A 208     -17.678  20.412   1.360  7.00  0.00           C  
ATOM   3699  C   CNT A 208     -16.229  18.172   0.640  2.00  0.00           C  
ATOM   3700  C   CNT A 208     -16.014  19.395   0.000  6.00  0.00           C  
ATOM   3701  C   CNT A 208     -16.729  20.526   0.360  8.00  0.00           C  
ATOM   3702  C   CNT A 208     -16.731  21.681  -0.470  5.00  0.00           C  
ATOM   3703  C   CNT A 208     -15.326  19.368  -1.240  2.00  0.00           C  
ATOM   3704  C   CNT A 208     -15.653  20.366  -2.220  1.00  0.00           C  
ATOM   3705  C   CNT A 208     -16.480  21.477  -1.880  1.00  0.00           C  
ATOM   3706  C   CNT A 208     -17.377  22.060  -2.810  6.00  0.00           C  
ATOM   3707  C   CNT A 208     -15.891  19.873  -3.540  4.00  0.00           C  
ATOM   3708  C   CNT A 208     -16.950  20.262  -4.340  4.00  0.00           C  
ATOM   3709  C   CNT A 208     -17.721  21.351  -3.940  4.00  0.00           C  
ATOM   3710  C   CNT A 208     -18.981  21.668  -4.560  5.00  0.00           C  
ATOM   3711  C   CNT A 208     -17.573  19.277  -5.180  1.00  0.00           C  
ATOM   3712  C   CNT A 208     -18.954  19.320  -5.300  7.00  0.00           C  
ATOM   3713  C   CNT A 208     -19.625  20.495  -5.090  0.00  0.00           C  
ATOM   3714  C   CNT A 208     -21.043  20.471  -4.950  2.00  0.00           C  
ATOM   3715  C   CNT A 208     -19.638  18.163  -5.640  2.00  0.00           C  
ATOM   3716  C   CNT A 208     -20.960  18.016  -5.280  0.00  0.00           C  
ATOM   3717  C   CNT A 208     -21.656  19.178  -4.940  1.00  0.00           C  
ATOM   3718  C   CNT A 208     -22.807  19.072  -4.150  8.00  0.00           C  
ATOM   3719  C   CNT A 208     -21.437  16.742  -4.990  5.00  0.00           C  
ATOM   3720  C   CNT A 208     -22.442  16.662  -3.960  5.00  0.00           C  
ATOM   3721  C   CNT A 208     -23.085  17.834  -3.520  4.00  0.00           C  
ATOM   3722  C   CNT A 208     -23.620  17.838  -2.210  8.00  0.00           C  
ATOM   3723  C   CNT A 208     -22.326  15.624  -2.990  0.00  0.00           C  
ATOM   3724  C   CNT A 208     -22.433  15.890  -1.640  5.00  0.00           C  
ATOM   3725  C   CNT A 208     -23.078  17.025  -1.220  1.00  0.00           C  
ATOM   3726  C   CNT A 208     -23.022  17.538   0.100  2.00  0.00           C  
ATOM   3727  C   CNT A 208     -21.640  15.185  -0.690  9.00  0.00           C  
ATOM   3728  C   CNT A 208     -21.284  15.907   0.430  0.00  0.00           C  
ATOM   3729  C   CNT A 208     -22.008  17.021   0.840  6.00  0.00           C  
ATOM   3730  C   CNT A 208     -21.431  17.806   1.800  5.00  0.00           C  
ATOM   3731  C   CNT A 208     -22.197  18.940   2.190  6.00  0.00           C  
ATOM   3732  C   CNT A 208     -21.542  20.030   2.820  5.00  0.00           C  
ATOM   3733  C   CNT A 208     -22.261  21.126   3.260  6.00  0.00           C  
ATOM   3734  C   CNT A 208     -21.587  22.334   3.580  9.00  0.00           C  
ATOM   3735  C   CNT A 208     -20.120  20.087   2.770  7.00  0.00           C  
ATOM   3736  C   CNT A 208     -19.575  21.339   2.590  1.00  0.00           C  
ATOM   3737  C   CNT A 208     -20.299  22.451   3.050  1.00  0.00           C  
ATOM   3738  C   CNT A 208     -19.789  23.729   2.720  5.00  0.00           C  
ATOM   3739  C   CNT A 208     -18.421  21.518   1.770  7.00  0.00           C  
ATOM   3740  C   CNT A 208     -18.093  22.784   1.240  0.00  0.00           C  
ATOM   3741  C   CNT A 208     -18.906  23.911   1.620  4.00  0.00           C  
ATOM   3742  C   CNT A 208     -19.055  24.993   0.690  7.00  0.00           C  
ATOM   3743  C   CNT A 208     -17.462  22.808  -0.020  5.00  0.00           C  
ATOM   3744  C   CNT A 208     -18.038  23.593  -1.000  5.00  0.00           C  
ATOM   3745  C   CNT A 208     -18.836  24.700  -0.620  7.00  0.00           C  
ATOM   3746  C   CNT A 208     -19.671  25.346  -1.550  1.00  0.00           C  
ATOM   3747  C   CNT A 208     -18.171  23.120  -2.350  3.00  0.00           C  
ATOM   3748  C   CNT A 208     -19.312  23.549  -3.090  7.00  0.00           C  
ATOM   3749  C   CNT A 208     -19.953  24.772  -2.760  4.00  0.00           C  
ATOM   3750  C   CNT A 208     -21.197  25.013  -3.380  8.00  0.00           C  
ATOM   3751  C   CNT A 208     -19.769  22.701  -4.130  2.00  0.00           C  
ATOM   3752  C   CNT A 208     -21.082  22.811  -4.460  3.00  0.00           C  
ATOM   3753  C   CNT A 208     -21.826  23.950  -3.990  3.00  0.00           C  
ATOM   3754  C   CNT A 208     -23.217  23.789  -3.770  1.00  0.00           C  
ATOM   3755  C   CNT A 208     -21.822  21.617  -4.740  2.00  0.00           C  
ATOM   3756  C   CNT A 208     -23.097  21.427  -4.120  8.00  0.00           C  
ATOM   3757  C   CNT A 208     -23.824  22.543  -3.700  0.00  0.00           C  
ATOM   3758  C   CNT A 208     -25.000  22.405  -2.980  7.00  0.00           C  
ATOM   3759  C   CNT A 208     -23.529  20.155  -3.710  9.00  0.00           C  
ATOM   3760  C   CNT A 208     -24.512  20.028  -2.750  1.00  0.00           C  
ATOM   3761  C   CNT A 208     -25.263  21.138  -2.370  4.00  0.00           C  
ATOM   3762  C   CNT A 208     -25.855  21.221  -1.060  4.00  0.00           C  
ATOM   3763  C   CNT A 208     -24.455  18.910  -1.840  2.00  0.00           C  
ATOM   3764  C   CNT A 208     -24.732  19.131  -0.450  1.00  0.00           C  
ATOM   3765  C   CNT A 208     -25.451  20.311  -0.090  0.00  0.00           C  
ATOM   3766  C   CNT A 208     -25.275  20.781   1.240  2.00  0.00           C  
ATOM   3767  C   CNT A 208     -23.900  18.508   0.480  8.00  0.00           C  
ATOM   3768  C   CNT A 208     -23.434  19.220   1.600  5.00  0.00           C  
ATOM   3769  C   CNT A 208     -24.142  20.347   1.990  9.00  0.00           C  
ATOM   3770  C   CNT A 208     -23.617  21.229   2.960  0.00  0.00           C  
ATOM   3771  C   CNT A 208     -24.368  22.326   3.450  3.00  0.00           C  
ATOM   3772  C   CNT A 208     -23.744  23.406   4.090  9.00  0.00           C  
ATOM   3773  C   CNT A 208     -24.454  24.521   4.490  2.00  0.00           C  
ATOM   3774  C   CNT A 208     -23.763  25.685   4.830  2.00  0.00           C  
ATOM   3775  C   CNT A 208     -22.319  23.472   4.060  4.00  0.00           C  
ATOM   3776  C   CNT A 208     -21.665  24.695   4.030  7.00  0.00           C  
ATOM   3777  C   CNT A 208     -22.466  25.808   4.380  2.00  0.00           C  
ATOM   3778  C   CNT A 208     -22.042  27.077   3.880  9.00  0.00           C  
ATOM   3779  C   CNT A 208     -20.552  24.850   3.150  5.00  0.00           C  
ATOM   3780  C   CNT A 208     -20.467  26.068   2.390  3.00  0.00           C  
ATOM   3781  C   CNT A 208     -21.251  27.170   2.810  2.00  0.00           C  
ATOM   3782  C   CNT A 208     -21.470  28.218   1.880  1.00  0.00           C  
ATOM   3783  C   CNT A 208     -19.824  26.097   1.120  3.00  0.00           C  
ATOM   3784  C   CNT A 208     -20.345  26.928   0.160  6.00  0.00           C  
ATOM   3785  C   CNT A 208     -21.078  28.044   0.540  8.00  0.00           C  
ATOM   3786  C   CNT A 208     -21.719  28.779  -0.370  7.00  0.00           C  
ATOM   3787  C   CNT A 208     -20.324  26.509  -1.200  3.00  0.00           C  
ATOM   3788  C   CNT A 208     -21.322  26.991  -2.000  2.00  0.00           C  
ATOM   3789  C   CNT A 208     -22.088  28.113  -1.560  9.00  0.00           C  
ATOM   3790  C   CNT A 208     -23.365  28.358  -2.210  0.00  0.00           C  
ATOM   3791  C   CNT A 208     -21.892  26.128  -3.000  9.00  0.00           C  
ATOM   3792  C   CNT A 208     -23.247  26.206  -3.350  2.00  0.00           C  
ATOM   3793  C   CNT A 208     -24.007  27.327  -2.910  2.00  0.00           C  
ATOM   3794  C   CNT A 208     -25.457  27.248  -2.770  6.00  0.00           C  
ATOM   3795  C   CNT A 208     -23.926  24.946  -3.390  6.00  0.00           C  
ATOM   3796  C   CNT A 208     -25.297  24.803  -3.100  5.00  0.00           C  
ATOM   3797  C   CNT A 208     -25.962  25.966  -2.650  0.00  0.00           C  
ATOM   3798  C   CNT A 208     -27.098  25.785  -1.810  1.00  0.00           C  
ATOM   3799  C   CNT A 208     -25.751  23.544  -2.680  8.00  0.00           C  
ATOM   3800  C   CNT A 208     -26.699  23.434  -1.660  7.00  0.00           C  
ATOM   3801  C   CNT A 208     -27.389  24.542  -1.190  2.00  0.00           C  
ATOM   3802  C   CNT A 208     -27.965  24.602   0.120  3.00  0.00           C  
ATOM   3803  C   CNT A 208     -26.563  22.336  -0.700  0.00  0.00           C  
ATOM   3804  C   CNT A 208     -26.669  22.678   0.650  5.00  0.00           C  
ATOM   3805  C   CNT A 208     -27.434  23.762   1.080  8.00  0.00           C  
ATOM   3806  C   CNT A 208     -27.481  24.099   2.460  3.00  0.00           C  
ATOM   3807  C   CNT A 208     -25.847  21.991   1.590  6.00  0.00           C  
ATOM   3808  C   CNT A 208     -25.621  22.568   2.890  1.00  0.00           C  
ATOM   3809  C   CNT A 208     -26.418  23.706   3.330  2.00  0.00           C  
ATOM   3810  C   CNT A 208     -25.816  24.600   4.240  2.00  0.00           C  
ATOM   3811  C   CNT A 208     -26.605  25.729   4.680  6.00  0.00           C  
ATOM   3812  C   CNT A 208     -25.899  26.690   5.470  1.00  0.00           C  
ATOM   3813  C   CNT A 208     -26.628  27.918   5.680  4.00  0.00           C  
ATOM   3814  C   CNT A 208     -25.926  29.144   6.020  6.00  0.00           C  
ATOM   3815  C   CNT A 208     -24.496  26.799   5.320  0.00  0.00           C  
ATOM   3816  C   CNT A 208     -23.884  28.052   5.220  7.00  0.00           C  
ATOM   3817  C   CNT A 208     -24.599  29.288   5.580  7.00  0.00           C  
ATOM   3818  C   CNT A 208     -24.207  30.525   5.140  1.00  0.00           C  
ATOM   3819  C   CNT A 208     -22.764  28.185   4.390  0.00  0.00           C  
ATOM   3820  C   CNT A 208     -22.675  29.445   3.600  7.00  0.00           C  
ATOM   3821  C   CNT A 208     -23.365  30.580   4.020  7.00  0.00           C  
ATOM   3822  C   CNT A 208     -23.451  31.623   3.130  6.00  0.00           C  
ATOM   3823  C   CNT A 208     -22.120  29.364   2.320  7.00  0.00           C  
ATOM   3824  C   CNT A 208     -22.560  30.270   1.350  6.00  0.00           C  
ATOM   3825  C   CNT A 208     -23.293  31.366   1.790  2.00  0.00           C  
ATOM   3826  C   CNT A 208     -23.982  32.107   0.800  9.00  0.00           C  
ATOM   3827  C   CNT A 208     -22.576  29.855  -0.000  2.00  0.00           C  
ATOM   3828  C   CNT A 208     -23.540  30.404  -0.860  1.00  0.00           C  
ATOM   3829  C   CNT A 208     -24.342  31.509  -0.420  0.00  0.00           C  
ATOM   3830  C   CNT A 208     -25.547  31.763  -1.040  5.00  0.00           C  
ATOM   3831  C   CNT A 208     -24.011  29.556  -1.880  9.00  0.00           C  
ATOM   3832  C   CNT A 208     -25.446  29.583  -2.180  6.00  0.00           C  
ATOM   3833  C   CNT A 208     -26.191  30.687  -1.690  4.00  0.00           C  
ATOM   3834  C   CNT A 208     -27.617  30.612  -1.480  6.00  0.00           C  
ATOM   3835  C   CNT A 208     -26.163  28.378  -2.350  6.00  0.00           C  
ATOM   3836  C   CNT A 208     -27.446  28.182  -1.810  5.00  0.00           C  
ATOM   3837  C   CNT A 208     -28.223  29.330  -1.470  9.00  0.00           C  
ATOM   3838  C   CNT A 208     -29.436  29.146  -0.740  4.00  0.00           C  
ATOM   3839  C   CNT A 208     -27.853  26.886  -1.470  7.00  0.00           C  
ATOM   3840  C   CNT A 208     -28.831  26.785  -0.440  5.00  0.00           C  
ATOM   3841  C   CNT A 208     -29.544  27.921  -0.060  8.00  0.00           C  
ATOM   3842  C   CNT A 208     -30.123  27.951   1.250  2.00  0.00           C  
ATOM   3843  C   CNT A 208     -28.652  25.762   0.500  8.00  0.00           C  
ATOM   3844  C   CNT A 208     -28.898  25.965   1.880  2.00  0.00           C  
ATOM   3845  C   CNT A 208     -29.623  27.092   2.230  4.00  0.00           C  
ATOM   3846  C   CNT A 208     -29.645  27.523   3.560  2.00  0.00           C  
ATOM   3847  C   CNT A 208     -28.157  25.296   2.820  8.00  0.00           C  
ATOM   3848  C   CNT A 208     -27.810  25.976   4.040  1.00  0.00           C  
ATOM   3849  C   CNT A 208     -28.573  27.113   4.370  8.00  0.00           C  
ATOM   3850  C   CNT A 208     -28.001  28.010   5.340  7.00  0.00           C  
ATOM   3851  C   CNT A 208     -28.715  29.151   5.790  0.00  0.00           C  
ATOM   3852  C   CNT A 208     -28.045  30.204   6.440  7.00  0.00           C  
ATOM   3853  C   CNT A 208     -28.722  31.398   6.690  8.00  0.00           C  
ATOM   3854  C   CNT A 208     -27.986  32.486   7.190  9.00  0.00           C  
ATOM   3855  C   CNT A 208     -26.634  30.310   6.320  7.00  0.00           C  
ATOM   3856  C   CNT A 208     -26.013  31.539   6.290  2.00  0.00           C  
ATOM   3857  C   CNT A 208     -26.664  32.733   6.830  2.00  0.00           C  
ATOM   3858  C   CNT A 208     -25.951  34.003   6.530  3.00  0.00           C  
ATOM   3859  C   CNT A 208     -24.853  31.669   5.570  2.00  0.00           C  
ATOM   3860  C   CNT A 208     -24.684  32.855   4.840  1.00  0.00           C  
ATOM   3861  C   CNT A 208     -25.289  34.007   5.270  8.00  0.00           C  
ATOM   3862  C   CNT A 208     -25.370  35.038   4.340  1.00  0.00           C  
ATOM   3863  C   CNT A 208     -24.143  32.752   3.500  4.00  0.00           C  
ATOM   3864  C   CNT A 208     -24.557  33.681   2.530  1.00  0.00           C  
ATOM   3865  C   CNT A 208     -25.297  34.822   2.940  9.00  0.00           C  
ATOM   3866  C   CNT A 208     -26.028  35.467   1.880  5.00  0.00           C  
ATOM   3867  C   CNT A 208     -24.737  33.226   1.240  6.00  0.00           C  
ATOM   3868  C   CNT A 208     -25.827  33.615   0.420  5.00  0.00           C  
ATOM   3869  C   CNT A 208     -26.503  34.771   0.760  9.00  0.00           C  
ATOM   3870  C   CNT A 208     -27.676  35.062  -0.010  5.00  0.00           C  
ATOM   3871  C   CNT A 208     -26.362  32.761  -0.470  9.00  0.00           C  
ATOM   3872  C   CNT A 208     -27.681  32.929  -0.940  3.00  0.00           C  
ATOM   3873  C   CNT A 208     -28.468  34.084  -0.670  8.00  0.00           C  
ATOM   3874  C   CNT A 208     -29.821  33.911  -0.850  5.00  0.00           C  
ATOM   3875  C   CNT A 208     -28.335  31.713  -1.100  7.00  0.00           C  
ATOM   3876  C   CNT A 208     -29.740  31.569  -0.790  6.00  0.00           C  
ATOM   3877  C   CNT A 208     -30.504  32.735  -0.580  2.00  0.00           C  
ATOM   3878  C   CNT A 208     -31.711  32.422   0.140  8.00  0.00           C  
ATOM   3879  C   CNT A 208     -30.199  30.302  -0.410  9.00  0.00           C  
ATOM   3880  C   CNT A 208     -31.002  30.238   0.700  0.00  0.00           C  
ATOM   3881  C   CNT A 208     -31.873  31.309   0.960  0.00  0.00           C  
ATOM   3882  C   CNT A 208     -32.621  31.151   2.140  2.00  0.00           C  
ATOM   3883  C   CNT A 208     -30.787  29.144   1.590  7.00  0.00           C  
ATOM   3884  C   CNT A 208     -31.088  29.376   2.950  1.00  0.00           C  
ATOM   3885  C   CNT A 208     -31.926  30.482   3.280  0.00  0.00           C  
ATOM   3886  C   CNT A 208     -31.775  30.892   4.630  5.00  0.00           C  
ATOM   3887  C   CNT A 208     -30.334  28.676   3.940  4.00  0.00           C  
ATOM   3888  C   CNT A 208     -29.989  29.331   5.170  2.00  0.00           C  
ATOM   3889  C   CNT A 208     -30.710  30.492   5.520  4.00  0.00           C  
ATOM   3890  C   CNT A 208     -30.123  31.278   6.560  1.00  0.00           C  
ATOM   3891  N   LIG A 209      12.981 -27.669 -12.510  4.00  0.00           N  
ATOM   3892  N   LIG A 209       7.582 -27.959 -22.330  2.00  0.00           N  
ATOM   3893  N   LIG A 209     -25.000  35.956   7.130  6.00  0.00           N  
ATOM   3894  N   LIG A 209     -34.488  31.263   3.480  4.00  0.00           N  
ATOM   3895  C   LIG A 209      11.702 -28.112 -12.820  5.00  0.00           C  
ATOM   3896  C   LIG A 209       6.775 -28.358 -21.240  2.00  0.00           C  
ATOM   3897  C   LIG A 209     -26.011  35.114   7.570  2.00  0.00           C  
ATOM   3898  C   LIG A 209     -34.078  31.775   2.230  7.00  0.00           C  
ATOM   3899  O   LIG A 209      10.880 -28.990 -12.950  5.00  0.00           O  
ATOM   3900  O   LIG A 209       6.073 -29.113 -20.670  4.00  0.00           O  
ATOM   3901  O   LIG A 209     -26.859  34.854   8.340  1.00  0.00           O  
ATOM   3902  O   LIG A 209     -34.314  32.417   1.280  7.00  0.00           O  
ATOM   3903  C1  LIG A 209      14.203 -28.465 -12.580  8.00  0.00           C  
ATOM   3904  C1  LIG A 209       7.241 -28.590 -23.640  5.00  0.00           C  
ATOM   3905  C1  LIG A 209     -24.192  36.665   8.150  6.00  0.00           C  
ATOM   3906  C1  LIG A 209     -35.835  31.739   3.870  3.00  0.00           C  
ATOM   3907  N1  LIG A 209      15.666 -26.443 -12.610  6.00  0.00           N  
ATOM   3908  N1  LIG A 209       6.278 -26.287 -24.330  8.00  0.00           N  
ATOM   3909  N1  LIG A 209     -22.693  34.659   8.290  7.00  0.00           N  
ATOM   3910  N1  LIG A 209     -35.564  30.433   5.940  7.00  0.00           N  
ATOM   3911  O1  LIG A 209      15.821 -22.101 -14.220  2.00  0.00           O  
ATOM   3912  O1  LIG A 209       5.494 -21.825 -23.270  3.00  0.00           O  
ATOM   3913  O1  LIG A 209     -21.247  30.460   6.990  0.00  0.00           O  
ATOM   3914  O1  LIG A 209     -32.099  28.125   8.030  6.00  0.00           O  
ATOM   3915  C2  LIG A 209      15.281 -27.620 -11.830  2.00  0.00           C  
ATOM   3916  C2  LIG A 209       6.146 -27.790 -24.350  1.00  0.00           C  
ATOM   3917  C2  LIG A 209     -23.428  35.662   9.020  9.00  0.00           C  
ATOM   3918  C2  LIG A 209     -36.485  30.771   4.870  3.00  0.00           C  
ATOM   3919  N2  LIG A 209      16.593 -25.164 -14.310  6.00  0.00           N  
ATOM   3920  N2  LIG A 209       6.902 -24.202 -24.760  8.00  0.00           N  
ATOM   3921  N2  LIG A 209     -21.229  33.676   6.950  9.00  0.00           N  
ATOM   3922  N2  LIG A 209     -34.371  30.405   7.900  2.00  0.00           N  
ATOM   3923  C3  LIG A 209      16.539 -26.404 -13.680  2.00  0.00           C  
ATOM   3924  C3  LIG A 209       7.179 -25.491 -25.040  3.00  0.00           C  
ATOM   3925  C3  LIG A 209     -21.699  34.841   7.350  9.00  0.00           C  
ATOM   3926  C3  LIG A 209     -35.418  30.935   7.250  3.00  0.00           C  
ATOM   3927  N3  LIG A 209      14.220 -24.786 -11.530  4.00  0.00           N  
ATOM   3928  N3  LIG A 209       4.327 -25.635 -22.850  4.00  0.00           N  
ATOM   3929  N3  LIG A 209     -23.980  32.696   9.050  1.00  0.00           N  
ATOM   3930  N3  LIG A 209     -34.535  28.510   4.800  1.00  0.00           N  
ATOM   3931  C4  LIG A 209      15.680 -24.379 -13.500  0.00  0.00           C  
ATOM   3932  C4  LIG A 209       5.854 -24.104 -23.890  6.00  0.00           C  
ATOM   3933  C4  LIG A 209     -21.975  32.704   7.580  7.00  0.00           C  
ATOM   3934  C4  LIG A 209     -33.855  29.453   6.970  2.00  0.00           C  
ATOM   3935  N4  LIG A 209      14.515 -22.667 -12.490  2.00  0.00           N  
ATOM   3936  N4  LIG A 209       4.099 -23.290 -22.610  6.00  0.00           N  
ATOM   3937  N4  LIG A 209     -22.928  30.705   8.400  3.00  0.00           N  
ATOM   3938  N4  LIG A 209     -32.749  27.649   6.040  8.00  0.00           N  
ATOM   3939  C5  LIG A 209      15.119 -25.180 -12.580  4.00  0.00           C  
ATOM   3940  C5  LIG A 209       5.452 -25.394 -23.670  3.00  0.00           C  
ATOM   3941  C5  LIG A 209     -22.902  33.330   8.390  0.00  0.00           C  
ATOM   3942  C5  LIG A 209     -34.688  29.444   5.860  3.00  0.00           C  
ATOM   3943  N5  LIG A 209      13.398 -22.985 -10.630  3.00  0.00           N  
ATOM   3944  N5  LIG A 209       2.896 -24.738 -21.410  3.00  0.00           N  
ATOM   3945  N5  LIG A 209     -24.769  30.642   9.540  1.00  0.00           N  
ATOM   3946  N5  LIG A 209     -33.088  26.991   3.950  0.00  0.00           N  
ATOM   3947  C6  LIG A 209      15.301 -22.960 -13.490  7.00  0.00           C  
ATOM   3948  C6  LIG A 209       5.153 -22.979 -23.300  7.00  0.00           C  
ATOM   3949  C6  LIG A 209     -21.945  31.240   7.630  4.00  0.00           C  
ATOM   3950  C6  LIG A 209     -32.846  28.378   7.140  8.00  0.00           C  
ATOM   3951  C7  LIG A 209      13.977 -23.503 -11.660  5.00  0.00           C  
ATOM   3952  C7  LIG A 209       3.778 -24.544 -22.380  9.00  0.00           C  
ATOM   3953  C7  LIG A 209     -23.868  31.405   8.950  3.00  0.00           C  
ATOM   3954  C7  LIG A 209     -33.471  27.767   4.920  9.00  0.00           C  
ATOM   3955  H   LIG A 209      13.139 -26.587 -12.740  4.00  0.00           H  
ATOM   3956  H   LIG A 209       7.864 -26.995 -22.440  2.00  0.00           H  
ATOM   3957  H   LIG A 209     -24.378  35.638   6.410  3.00  0.00           H  
ATOM   3958  H   LIG A 209     -34.339  30.240   3.500  8.00  0.00           H  
ATOM   3959  H1  LIG A 209      14.353 -28.633 -13.650  4.00  0.00           H  
ATOM   3960  H1  LIG A 209       6.888 -29.632 -23.470  1.00  0.00           H  
ATOM   3961  H1  LIG A 209     -24.950  37.372   8.680  8.00  0.00           H  
ATOM   3962  H1  LIG A 209     -36.566  31.638   3.040  6.00  0.00           H  
ATOM   3963  H2  LIG A 209      13.970 -29.385 -12.120  9.00  0.00           H  
ATOM   3964  H2  LIG A 209       8.131 -28.538 -24.310  2.00  0.00           H  
ATOM   3965  H2  LIG A 209     -23.459  37.331   7.620  1.00  0.00           H  
ATOM   3966  H2  LIG A 209     -35.849  32.765   4.150  8.00  0.00           H  
ATOM   3967  H3  LIG A 209      16.127 -28.195 -11.690  5.00  0.00           H  
ATOM   3968  H3  LIG A 209       5.155 -27.996 -23.930  1.00  0.00           H  
ATOM   3969  H3  LIG A 209     -24.184  35.219   9.730  2.00  0.00           H  
ATOM   3970  H3  LIG A 209     -36.980  29.876   4.350  8.00  0.00           H  
ATOM   3971  H4  LIG A 209      14.871 -27.363 -10.840  3.00  0.00           H  
ATOM   3972  H4  LIG A 209       6.129 -27.936 -25.400  5.00  0.00           H  
ATOM   3973  H4  LIG A 209     -22.652  36.110   9.630  0.00  0.00           H  
ATOM   3974  H4  LIG A 209     -37.365  31.190   5.410  4.00  0.00           H  
ATOM   3975  H5  LIG A 209      17.010 -27.346 -14.010  6.00  0.00           H  
ATOM   3976  H5  LIG A 209       7.941 -25.910 -25.650  1.00  0.00           H  
ATOM   3977  H5  LIG A 209     -21.311  35.807   7.200  0.00  0.00           H  
ATOM   3978  H5  LIG A 209     -36.148  31.686   7.600  5.00  0.00           H  
ATOM   3979  H6  LIG A 209      14.184 -21.731 -12.470  7.00  0.00           H  
ATOM   3980  H6  LIG A 209       3.712 -22.525 -22.030  9.00  0.00           H  
ATOM   3981  H6  LIG A 209     -23.114  29.677   8.350  1.00  0.00           H  
ATOM   3982  H6  LIG A 209     -32.064  26.883   6.200  7.00  0.00           H  
ATOM   3983  H7  LIG A 209      12.672 -23.613 -10.390  4.00  0.00           H  
ATOM   3984  H7  LIG A 209       2.227 -23.988 -21.250  7.00  0.00           H  
ATOM   3985  H7  LIG A 209     -24.720  29.657   9.670  9.00  0.00           H  
ATOM   3986  H7  LIG A 209     -33.380  27.359   3.030  4.00  0.00           H  
ATOM   3987  H8  LIG A 209      13.197 -21.971 -10.670  1.00  0.00           H  
ATOM   3988  H8  LIG A 209       2.722 -25.664 -20.970  8.00  0.00           H  
ATOM   3989  H8  LIG A 209     -25.521  31.178   9.930  1.00  0.00           H  
ATOM   3990  H8  LIG A 209     -32.199  26.579   4.040  2.00  0.00           H  
END
