# Supplementary material for: Molecular Dynamics Study of the Interaction of Carbon Nanotubes with Telomeric DNA Fragment Containing Noncanonical G-Quadruplex and i-Motif Forms
Source: Int J Mol Sci. 2020 Mar 11;21(6):1925. doi: 10.3390/ijms21061925 (PMC7139311; doi:10.3390/ijms21061925)
Supplement: Supplementary file 1 [file ijms-21-01925-s001.zip › fig3_B.pdb]

HEADER    a10x
ATOM      1  C5' DG5 A   1      10.620  -1.375 -31.370  3.00  0.00           C  
ATOM      2  O5' DG5 A   1      11.020  -0.106 -31.930  0.00  0.00           O  
ATOM      3  C4' DG5 A   1      11.569  -1.944 -30.320  9.00  0.00           C  
ATOM      4  O4' DG5 A   1      11.411  -1.195 -29.170  1.00  0.00           O  
ATOM      5  C3' DG5 A   1      11.140  -3.387 -29.990  8.00  0.00           C  
ATOM      6  O3' DG5 A   1      12.152  -4.292 -29.620  2.00  0.00           O  
ATOM      7  C2' DG5 A   1      10.070  -3.091 -28.890  7.00  0.00           C  
ATOM      8  C1' DG5 A   1      10.475  -1.763 -28.280  8.00  0.00           C  
ATOM      9  N1  DG5 A   1       8.647   1.775 -24.980  7.00  0.00           N  
ATOM     10  C2  DG5 A   1       9.893   1.202 -25.050  9.00  0.00           C  
ATOM     11  N2  DG5 A   1      10.858   1.563 -24.250  7.00  0.00           N  
ATOM     12  N3  DG5 A   1      10.292   0.388 -25.990  3.00  0.00           N  
ATOM     13  C4  DG5 A   1       9.296   0.153 -26.920  1.00  0.00           C  
ATOM     14  C5  DG5 A   1       7.954   0.598 -26.840  0.00  0.00           C  
ATOM     15  C6  DG5 A   1       7.664   1.603 -25.890  7.00  0.00           C  
ATOM     16  O6  DG5 A   1       6.742   2.375 -25.910  1.00  0.00           O  
ATOM     17  N7  DG5 A   1       7.203   0.075 -27.930  3.00  0.00           N  
ATOM     18  C8  DG5 A   1       8.062  -0.720 -28.500  4.00  0.00           C  
ATOM     19  N9  DG5 A   1       9.336  -0.818 -27.960  1.00  0.00           N  
ATOM     20 HO5' DG5 A   1      11.436  -0.208 -32.840  2.00  0.00           H  
ATOM     21  H1  DG5 A   1       8.521   2.336 -24.110  7.00  0.00           H  
ATOM     22  H8  DG5 A   1       7.811  -1.285 -29.360  8.00  0.00           H  
ATOM     23  H1' DG5 A   1      10.998  -1.925 -27.300  9.00  0.00           H  
ATOM     24  H2' DG5 A   1       9.080  -3.112 -29.300  5.00  0.00           H  
ATOM     25  H21 DG5 A   1      10.664   2.095 -23.440  3.00  0.00           H  
ATOM     26  H3' DG5 A   1      10.606  -3.893 -30.860  9.00  0.00           H  
ATOM     27  H22 DG5 A   1      11.786   1.133 -24.410  8.00  0.00           H  
ATOM     28  H4' DG5 A   1      12.632  -1.890 -30.620  9.00  0.00           H  
ATOM     29  H5' DG5 A   1      10.521  -2.090 -32.260  1.00  0.00           H  
ATOM     30 H2'' DG5 A   1      10.043  -3.861 -28.140  1.00  0.00           H  
ATOM     31 H5'' DG5 A   1       9.569  -1.348 -30.940  9.00  0.00           H  
ATOM     32  P    DG A   2      11.969  -5.875 -29.520  9.00  0.00           P  
ATOM     33  C5'  DG A   2      12.144  -5.846 -26.880  1.00  0.00           C  
ATOM     34  O5'  DG A   2      11.340  -6.064 -28.020  4.00  0.00           O  
ATOM     35  C4'  DG A   2      11.470  -5.657 -25.560  4.00  0.00           C  
ATOM     36  O4'  DG A   2      10.512  -4.581 -25.670  3.00  0.00           O  
ATOM     37  C3'  DG A   2      10.724  -6.968 -25.130  4.00  0.00           C  
ATOM     38  O3'  DG A   2      10.743  -7.004 -23.710  2.00  0.00           O  
ATOM     39  C2'  DG A   2       9.274  -6.624 -25.410  7.00  0.00           C  
ATOM     40  C1'  DG A   2       9.309  -5.105 -25.100  8.00  0.00           C  
ATOM     41  N1   DG A   2       6.719  -0.904 -24.140  6.00  0.00           N  
ATOM     42  C2   DG A   2       7.852  -1.405 -23.650  1.00  0.00           C  
ATOM     43  N2   DG A   2       8.444  -0.616 -22.780  9.00  0.00           N  
ATOM     44  N3   DG A   2       8.416  -2.506 -24.000  5.00  0.00           N  
ATOM     45  C4   DG A   2       7.806  -3.109 -25.090  9.00  0.00           C  
ATOM     46  C5   DG A   2       6.666  -2.693 -25.770  4.00  0.00           C  
ATOM     47  C6   DG A   2       6.057  -1.466 -25.280  8.00  0.00           C  
ATOM     48  O6   DG A   2       5.126  -0.727 -25.720  7.00  0.00           O  
ATOM     49  N7   DG A   2       6.451  -3.532 -26.880  0.00  0.00           N  
ATOM     50  C8   DG A   2       7.425  -4.403 -26.740  5.00  0.00           C  
ATOM     51  N9   DG A   2       8.184  -4.254 -25.600  7.00  0.00           N  
ATOM     52  OP1  DG A   2      13.319  -6.551 -29.550  0.00  0.00           O  
ATOM     53  OP2  DG A   2      10.978  -6.292 -30.530  9.00  0.00           O1-
ATOM     54  H1   DG A   2       6.438  -0.091 -23.650  4.00  0.00           H  
ATOM     55  H8   DG A   2       7.593  -5.231 -27.490  0.00  0.00           H  
ATOM     56  H1'  DG A   2       9.302  -4.952 -24.040  7.00  0.00           H  
ATOM     57  H2'  DG A   2       9.101  -6.695 -26.470  6.00  0.00           H  
ATOM     58  H21  DG A   2       7.843   0.108 -22.310  5.00  0.00           H  
ATOM     59  H3'  DG A   2      11.021  -7.921 -25.520  3.00  0.00           H  
ATOM     60  H22  DG A   2       9.328  -0.807 -22.410  2.00  0.00           H  
ATOM     61  H4'  DG A   2      12.195  -5.328 -24.790  8.00  0.00           H  
ATOM     62  H5'  DG A   2      12.799  -4.985 -27.180  2.00  0.00           H  
ATOM     63 H2''  DG A   2       8.568  -7.173 -24.830  0.00  0.00           H  
ATOM     64 H5''  DG A   2      12.818  -6.726 -26.770  0.00  0.00           H  
ATOM     65  P    DG A   3      11.694  -8.016 -22.940  8.00  0.00           P  
ATOM     66  C5'  DG A   3      12.102  -6.524 -20.890  1.00  0.00           C  
ATOM     67  O5'  DG A   3      11.418  -7.528 -21.490  7.00  0.00           O  
ATOM     68  C4'  DG A   3      11.320  -5.987 -19.670  8.00  0.00           C  
ATOM     69  O4'  DG A   3      10.441  -5.040 -20.160  0.00  0.00           O  
ATOM     70  C3'  DG A   3      10.518  -6.982 -18.800  8.00  0.00           C  
ATOM     71  O3'  DG A   3      10.711  -6.582 -17.480  8.00  0.00           O  
ATOM     72  C2'  DG A   3       9.131  -6.829 -19.390  2.00  0.00           C  
ATOM     73  C1'  DG A   3       9.155  -5.383 -19.880  3.00  0.00           C  
ATOM     74  N1   DG A   3       5.353  -2.691 -21.670  5.00  0.00           N  
ATOM     75  C2   DG A   3       6.037  -2.556 -20.530  2.00  0.00           C  
ATOM     76  N2   DG A   3       5.562  -1.585 -19.750  6.00  0.00           N  
ATOM     77  N3   DG A   3       7.165  -3.217 -20.250  6.00  0.00           N  
ATOM     78  C4   DG A   3       7.358  -4.244 -21.120  2.00  0.00           C  
ATOM     79  C5   DG A   3       6.565  -4.593 -22.210  8.00  0.00           C  
ATOM     80  C6   DG A   3       5.578  -3.674 -22.640  4.00  0.00           C  
ATOM     81  O6   DG A   3       4.879  -3.784 -23.600  9.00  0.00           O  
ATOM     82  N7   DG A   3       7.001  -5.776 -22.820  0.00  0.00           N  
ATOM     83  C8   DG A   3       7.976  -6.159 -22.050  0.00  0.00           C  
ATOM     84  N9   DG A   3       8.251  -5.265 -21.050  8.00  0.00           N  
ATOM     85  OP1  DG A   3      13.111  -7.787 -23.180  1.00  0.00           O  
ATOM     86  OP2  DG A   3      11.189  -9.400 -23.050  1.00  0.00           O1-
ATOM     87  H1   DG A   3       4.655  -2.006 -21.880  4.00  0.00           H  
ATOM     88  H8   DG A   3       8.631  -7.023 -22.280  5.00  0.00           H  
ATOM     89  H1'  DG A   3       8.745  -4.796 -19.070  0.00  0.00           H  
ATOM     90  H2'  DG A   3       9.030  -7.620 -20.160  4.00  0.00           H  
ATOM     91  H21  DG A   3       4.605  -1.253 -19.940  1.00  0.00           H  
ATOM     92  H3'  DG A   3      10.994  -7.962 -19.020  6.00  0.00           H  
ATOM     93  H22  DG A   3       6.038  -1.241 -18.930  9.00  0.00           H  
ATOM     94  H4'  DG A   3      12.072  -5.538 -18.970  2.00  0.00           H  
ATOM     95  H5'  DG A   3      12.260  -5.683 -21.600  8.00  0.00           H  
ATOM     96 H2''  DG A   3       8.407  -7.012 -18.690  6.00  0.00           H  
ATOM     97 H5''  DG A   3      13.030  -6.914 -20.530  9.00  0.00           H  
ATOM     98  P    DT A   4      10.038  -7.483 -16.310  5.00  0.00           P  
ATOM     99  C5'  DT A   4       8.089  -5.667 -15.830  0.00  0.00           C  
ATOM    100  O5'  DT A   4       8.485  -6.972 -16.210  5.00  0.00           O  
ATOM    101  C4'  DT A   4       6.590  -5.382 -16.190  0.00  0.00           C  
ATOM    102  O4'  DT A   4       6.325  -5.490 -17.570  7.00  0.00           O  
ATOM    103  C3'  DT A   4       5.523  -6.256 -15.530  4.00  0.00           C  
ATOM    104  O3'  DT A   4       4.677  -5.529 -14.650  4.00  0.00           O  
ATOM    105  C2'  DT A   4       4.651  -6.754 -16.730  5.00  0.00           C  
ATOM    106  C1'  DT A   4       5.008  -5.794 -17.860  0.00  0.00           C  
ATOM    107  N1   DT A   4       4.795  -6.304 -19.190  9.00  0.00           N  
ATOM    108  C2   DT A   4       3.938  -5.580 -20.030  5.00  0.00           C  
ATOM    109  O2   DT A   4       3.512  -4.510 -19.740  2.00  0.00           O  
ATOM    110  N3   DT A   4       3.637  -6.173 -21.250  6.00  0.00           N  
ATOM    111  C4   DT A   4       4.127  -7.408 -21.710  5.00  0.00           C  
ATOM    112  O4   DT A   4       3.695  -7.800 -22.740  2.00  0.00           O  
ATOM    113  C5   DT A   4       5.055  -8.007 -20.820  9.00  0.00           C  
ATOM    114  C6   DT A   4       5.409  -7.442 -19.650  0.00  0.00           C  
ATOM    115  C7   DT A   4       5.664  -9.365 -21.120  6.00  0.00           C  
ATOM    116  OP1  DT A   4      10.724  -7.114 -15.040  2.00  0.00           O  
ATOM    117  OP2  DT A   4       9.982  -8.860 -16.700  8.00  0.00           O1-
ATOM    118  H3   DT A   4       2.851  -5.723 -21.710  1.00  0.00           H  
ATOM    119  H6   DT A   4       6.165  -7.937 -19.040  7.00  0.00           H  
ATOM    120  H1'  DT A   4       4.265  -4.949 -17.780  4.00  0.00           H  
ATOM    121  H2'  DT A   4       4.949  -7.781 -17.030  9.00  0.00           H  
ATOM    122  H3'  DT A   4       5.944  -7.086 -14.960  3.00  0.00           H  
ATOM    123  H4'  DT A   4       6.324  -4.330 -15.920  7.00  0.00           H  
ATOM    124  H5'  DT A   4       8.647  -4.886 -16.390  5.00  0.00           H  
ATOM    125  H71  DT A   4       6.467  -9.566 -20.420  3.00  0.00           H  
ATOM    126  H72  DT A   4       4.771 -10.009 -20.950  6.00  0.00           H  
ATOM    127  H73  DT A   4       6.120  -9.341 -22.110  0.00  0.00           H  
ATOM    128 H2''  DT A   4       3.612  -6.773 -16.520  6.00  0.00           H  
ATOM    129 H5''  DT A   4       8.251  -5.592 -14.820  3.00  0.00           H  
ATOM    130  P    DT A   5       3.551  -6.194 -13.760  1.00  0.00           P  
ATOM    131  C5'  DT A   5       1.517  -4.558 -14.410  2.00  0.00           C  
ATOM    132  O5'  DT A   5       2.118  -5.870 -14.360  7.00  0.00           O  
ATOM    133  C4'  DT A   5       0.258  -4.429 -15.150  4.00  0.00           C  
ATOM    134  O4'  DT A   5       0.360  -4.930 -16.400  5.00  0.00           O  
ATOM    135  C3'  DT A   5      -0.750  -5.309 -14.450  9.00  0.00           C  
ATOM    136  O3'  DT A   5      -1.894  -4.465 -14.160  7.00  0.00           O  
ATOM    137  C2'  DT A   5      -0.951  -6.445 -15.400  4.00  0.00           C  
ATOM    138  C1'  DT A   5      -0.768  -5.766 -16.720  1.00  0.00           C  
ATOM    139  N1   DT A   5      -0.301  -6.606 -17.850  1.00  0.00           N  
ATOM    140  C2   DT A   5      -0.943  -6.431 -19.080  7.00  0.00           C  
ATOM    141  O2   DT A   5      -1.920  -5.681 -19.240  0.00  0.00           O  
ATOM    142  N3   DT A   5      -0.517  -7.213 -20.100  7.00  0.00           N  
ATOM    143  C4   DT A   5       0.539  -8.165 -20.020  8.00  0.00           C  
ATOM    144  O4   DT A   5       0.824  -8.874 -21.010  7.00  0.00           O  
ATOM    145  C5   DT A   5       1.138  -8.248 -18.680  7.00  0.00           C  
ATOM    146  C6   DT A   5       0.734  -7.460 -17.650  2.00  0.00           C  
ATOM    147  C7   DT A   5       2.302  -9.170 -18.360  8.00  0.00           C  
ATOM    148  OP1  DT A   5       3.681  -5.537 -12.400  9.00  0.00           O  
ATOM    149  OP2  DT A   5       3.709  -7.631 -13.920  8.00  0.00           O1-
ATOM    150  H3   DT A   5      -0.948  -7.349 -20.950  4.00  0.00           H  
ATOM    151  H6   DT A   5       1.224  -7.463 -16.750  1.00  0.00           H  
ATOM    152  H1'  DT A   5      -1.581  -5.101 -17.020  7.00  0.00           H  
ATOM    153  H2'  DT A   5      -0.215  -7.186 -15.180  6.00  0.00           H  
ATOM    154  H3'  DT A   5      -0.500  -5.632 -13.440  5.00  0.00           H  
ATOM    155  H4'  DT A   5      -0.159  -3.379 -15.240  6.00  0.00           H  
ATOM    156  H5'  DT A   5       2.186  -3.872 -15.010  8.00  0.00           H  
ATOM    157  H71  DT A   5       3.100  -9.247 -19.150  2.00  0.00           H  
ATOM    158  H72  DT A   5       2.623  -8.980 -17.350  2.00  0.00           H  
ATOM    159  H73  DT A   5       1.806 -10.184 -18.280  8.00  0.00           H  
ATOM    160 H2''  DT A   5      -1.908  -6.927 -15.290  9.00  0.00           H  
ATOM    161 H5''  DT A   5       1.338  -4.209 -13.370  2.00  0.00           H  
ATOM    162  P    DA A   6      -3.162  -4.851 -13.330  4.00  0.00           P  
ATOM    163  C5'  DA A   6      -4.654  -4.257 -15.370  6.00  0.00           C  
ATOM    164  O5'  DA A   6      -4.097  -5.250 -14.570  0.00  0.00           O  
ATOM    165  C4'  DA A   6      -5.552  -4.991 -16.420  3.00  0.00           C  
ATOM    166  O4'  DA A   6      -4.701  -5.903 -17.260  8.00  0.00           O  
ATOM    167  C3'  DA A   6      -6.654  -5.935 -15.940  5.00  0.00           C  
ATOM    168  O3'  DA A   6      -7.841  -5.787 -16.720  8.00  0.00           O  
ATOM    169  C2'  DA A   6      -6.038  -7.347 -16.080  4.00  0.00           C  
ATOM    170  C1'  DA A   6      -5.261  -7.194 -17.350  3.00  0.00           C  
ATOM    171  N1   DA A   6      -2.829  -9.596 -21.180  2.00  0.00           N  
ATOM    172  C2   DA A   6      -3.724  -8.605 -21.090  6.00  0.00           C  
ATOM    173  N3   DA A   6      -4.290  -8.034 -20.020  9.00  0.00           N  
ATOM    174  C4   DA A   6      -3.787  -8.608 -18.880  8.00  0.00           C  
ATOM    175  C5   DA A   6      -2.935  -9.628 -18.750  3.00  0.00           C  
ATOM    176  C6   DA A   6      -2.466 -10.100 -20.010  0.00  0.00           C  
ATOM    177  N6   DA A   6      -1.540 -10.992 -20.150  6.00  0.00           N  
ATOM    178  N7   DA A   6      -2.627  -9.821 -17.400  5.00  0.00           N  
ATOM    179  C8   DA A   6      -3.391  -8.946 -16.780  4.00  0.00           C  
ATOM    180  N9   DA A   6      -4.187  -8.197 -17.630  6.00  0.00           N  
ATOM    181  OP1  DA A   6      -3.784  -3.645 -12.770  5.00  0.00           O  
ATOM    182  OP2  DA A   6      -2.906  -6.039 -12.420  6.00  0.00           O1-
ATOM    183  H2   DA A   6      -4.047  -8.191 -22.090  0.00  0.00           H  
ATOM    184  H8   DA A   6      -3.357  -8.862 -15.710  0.00  0.00           H  
ATOM    185  H1'  DA A   6      -6.079  -7.192 -18.040  1.00  0.00           H  
ATOM    186  H2'  DA A   6      -5.282  -7.564 -15.310  3.00  0.00           H  
ATOM    187  H3'  DA A   6      -6.966  -5.722 -14.880  4.00  0.00           H  
ATOM    188  H4'  DA A   6      -5.907  -4.206 -17.080  4.00  0.00           H  
ATOM    189  H5'  DA A   6      -3.938  -3.668 -15.870  5.00  0.00           H  
ATOM    190  H61  DA A   6      -1.429 -11.442 -21.080  0.00  0.00           H  
ATOM    191  H62  DA A   6      -1.039 -11.422 -19.410  7.00  0.00           H  
ATOM    192 H2''  DA A   6      -6.749  -8.063 -16.100  6.00  0.00           H  
ATOM    193 H5''  DA A   6      -5.356  -3.542 -14.850  8.00  0.00           H  
ATOM    194  P    DG A   7      -9.214  -5.149 -16.160  6.00  0.00           P  
ATOM    195  C5'  DG A   7     -10.872  -5.469 -18.180  6.00  0.00           C  
ATOM    196  O5'  DG A   7     -10.377  -5.915 -16.940  8.00  0.00           O  
ATOM    197  C4'  DG A   7     -11.114  -6.718 -19.050  3.00  0.00           C  
ATOM    198  O4'  DG A   7      -9.848  -7.345 -19.170  8.00  0.00           O  
ATOM    199  C3'  DG A   7     -12.040  -7.780 -18.430  4.00  0.00           C  
ATOM    200  O3'  DG A   7     -12.917  -8.356 -19.370  9.00  0.00           O  
ATOM    201  C2'  DG A   7     -10.997  -8.780 -17.830  9.00  0.00           C  
ATOM    202  C1'  DG A   7     -10.017  -8.663 -18.980  3.00  0.00           C  
ATOM    203  N1   DG A   7      -5.954 -10.832 -21.210  9.00  0.00           N  
ATOM    204  C2   DG A   7      -7.040 -10.327 -21.750  5.00  0.00           C  
ATOM    205  N2   DG A   7      -7.212 -10.392 -23.060  4.00  0.00           N  
ATOM    206  N3   DG A   7      -8.040  -9.832 -21.050  7.00  0.00           N  
ATOM    207  C4   DG A   7      -7.897  -9.961 -19.670  0.00  0.00           C  
ATOM    208  C5   DG A   7      -6.780 -10.452 -19.030  2.00  0.00           C  
ATOM    209  C6   DG A   7      -5.813 -11.058 -19.910  2.00  0.00           C  
ATOM    210  O6   DG A   7      -4.792 -11.722 -19.650  2.00  0.00           O  
ATOM    211  N7   DG A   7      -6.922 -10.304 -17.670  8.00  0.00           N  
ATOM    212  C8   DG A   7      -8.136  -9.820 -17.530  3.00  0.00           C  
ATOM    213  N9   DG A   7      -8.748  -9.467 -18.740  9.00  0.00           N  
ATOM    214  OP1  DG A   7      -9.180  -3.740 -16.590  4.00  0.00           O  
ATOM    215  OP2  DG A   7      -9.390  -5.471 -14.760  4.00  0.00           O1-
ATOM    216  H1   DG A   7      -5.305 -11.419 -21.770  9.00  0.00           H  
ATOM    217  H8   DG A   7      -8.592  -9.495 -16.600  2.00  0.00           H  
ATOM    218  H1'  DG A   7     -10.600  -9.006 -19.770  1.00  0.00           H  
ATOM    219  H2'  DG A   7     -10.387  -8.461 -17.040  8.00  0.00           H  
ATOM    220  H21  DG A   7      -6.608 -10.988 -23.620  6.00  0.00           H  
ATOM    221  H3'  DG A   7     -12.631  -7.398 -17.620  4.00  0.00           H  
ATOM    222  H22  DG A   7      -8.135  -9.987 -23.370  4.00  0.00           H  
ATOM    223  H4'  DG A   7     -11.440  -6.331 -19.980  1.00  0.00           H  
ATOM    224  H5'  DG A   7     -10.121  -4.801 -18.620  9.00  0.00           H  
ATOM    225 H2''  DG A   7     -11.291  -9.847 -17.740  4.00  0.00           H  
ATOM    226 H5''  DG A   7     -11.813  -4.886 -17.970  6.00  0.00           H  
ATOM    227  P    DG A   8     -14.500  -8.232 -19.340  9.00  0.00           P  
ATOM    228  C5'  DG A   8     -14.905  -8.510 -21.920  9.00  0.00           C  
ATOM    229  O5'  DG A   8     -15.092  -9.063 -20.590  4.00  0.00           O  
ATOM    230  C4'  DG A   8     -14.141  -9.565 -22.820  8.00  0.00           C  
ATOM    231  O4'  DG A   8     -12.853  -9.909 -22.310  3.00  0.00           O  
ATOM    232  C3'  DG A   8     -14.878 -10.900 -23.020  7.00  0.00           C  
ATOM    233  O3'  DG A   8     -14.796 -11.318 -24.420  1.00  0.00           O  
ATOM    234  C2'  DG A   8     -14.022 -11.760 -22.100  4.00  0.00           C  
ATOM    235  C1'  DG A   8     -12.635 -11.292 -22.430  5.00  0.00           C  
ATOM    236  N1   DG A   8      -8.339 -13.894 -21.530  3.00  0.00           N  
ATOM    237  C2   DG A   8      -8.924 -13.611 -22.730  7.00  0.00           C  
ATOM    238  N2   DG A   8      -8.523 -14.364 -23.710  3.00  0.00           N  
ATOM    239  N3   DG A   8     -10.047 -12.909 -22.870  6.00  0.00           N  
ATOM    240  C4   DG A   8     -10.553 -12.505 -21.650  5.00  0.00           C  
ATOM    241  C5   DG A   8     -10.007 -12.740 -20.390  7.00  0.00           C  
ATOM    242  C6   DG A   8      -8.741 -13.426 -20.310  7.00  0.00           C  
ATOM    243  O6   DG A   8      -8.101 -13.721 -19.260  5.00  0.00           O  
ATOM    244  N7   DG A   8     -10.752 -12.087 -19.340  7.00  0.00           N  
ATOM    245  C8   DG A   8     -11.803 -11.601 -19.960  1.00  0.00           C  
ATOM    246  N9   DG A   8     -11.638 -11.688 -21.360  2.00  0.00           N  
ATOM    247  OP1  DG A   8     -14.941  -6.815 -19.660  2.00  0.00           O  
ATOM    248  OP2  DG A   8     -14.973  -8.813 -18.070  9.00  0.00           O1-
ATOM    249  H1   DG A   8      -7.675 -14.615 -21.490  5.00  0.00           H  
ATOM    250  H8   DG A   8     -12.583 -11.054 -19.440  0.00  0.00           H  
ATOM    251  H1'  DG A   8     -12.374 -11.557 -23.450  5.00  0.00           H  
ATOM    252  H2'  DG A   8     -14.276 -11.716 -21.010  3.00  0.00           H  
ATOM    253  H21  DG A   8      -7.808 -14.999 -23.640  7.00  0.00           H  
ATOM    254  H3'  DG A   8     -15.860 -10.849 -22.540  2.00  0.00           H  
ATOM    255  H22  DG A   8      -8.952 -14.182 -24.690  1.00  0.00           H  
ATOM    256  H4'  DG A   8     -13.991  -9.133 -23.750  1.00  0.00           H  
ATOM    257  H5'  DG A   8     -14.294  -7.570 -21.810  3.00  0.00           H  
ATOM    258 H2''  DG A   8     -14.223 -12.819 -22.330  7.00  0.00           H  
ATOM    259 H5''  DG A   8     -15.876  -8.426 -22.410  1.00  0.00           H  
ATOM    260  P    DG A   9     -15.608 -12.642 -25.000  8.00  0.00           P  
ATOM    261  C5'  DG A   9     -14.004 -14.008 -26.530  2.00  0.00           C  
ATOM    262  O5'  DG A   9     -14.593 -13.859 -25.200  6.00  0.00           O  
ATOM    263  C4'  DG A   9     -13.021 -15.222 -26.680  1.00  0.00           C  
ATOM    264  O4'  DG A   9     -12.065 -15.262 -25.620  4.00  0.00           O  
ATOM    265  C3'  DG A   9     -13.788 -16.544 -26.550  0.00  0.00           C  
ATOM    266  O3'  DG A   9     -13.023 -17.435 -27.280  8.00  0.00           O  
ATOM    267  C2'  DG A   9     -13.738 -16.909 -25.060  4.00  0.00           C  
ATOM    268  C1'  DG A   9     -12.327 -16.383 -24.730  3.00  0.00           C  
ATOM    269  N1   DG A   9      -9.489 -17.247 -20.500  0.00  0.00           N  
ATOM    270  C2   DG A   9      -9.363 -17.719 -21.760  5.00  0.00           C  
ATOM    271  N2   DG A   9      -8.614 -18.775 -22.030  3.00  0.00           N  
ATOM    272  N3   DG A   9     -10.233 -17.448 -22.800  2.00  0.00           N  
ATOM    273  C4   DG A   9     -11.240 -16.588 -22.490  1.00  0.00           C  
ATOM    274  C5   DG A   9     -11.460 -16.062 -21.200  1.00  0.00           C  
ATOM    275  C6   DG A   9     -10.506 -16.338 -20.120  5.00  0.00           C  
ATOM    276  O6   DG A   9     -10.556 -15.969 -18.930  5.00  0.00           O  
ATOM    277  N7   DG A   9     -12.608 -15.307 -21.220  1.00  0.00           N  
ATOM    278  C8   DG A   9     -12.959 -15.330 -22.510  1.00  0.00           C  
ATOM    279  N9   DG A   9     -12.142 -16.033 -23.320  0.00  0.00           N  
ATOM    280  OP1  DG A   9     -16.171 -12.307 -26.300  9.00  0.00           O  
ATOM    281  OP2  DG A   9     -16.498 -13.104 -23.950  1.00  0.00           O1-
ATOM    282  H1   DG A   9      -8.889 -17.628 -19.760  6.00  0.00           H  
ATOM    283  H8   DG A   9     -13.806 -14.736 -22.920  8.00  0.00           H  
ATOM    284  H1'  DG A   9     -11.643 -17.266 -24.790  7.00  0.00           H  
ATOM    285  H2'  DG A   9     -14.507 -16.391 -24.490  1.00  0.00           H  
ATOM    286  H21  DG A   9      -8.086 -19.330 -21.360  8.00  0.00           H  
ATOM    287  H3'  DG A   9     -14.804 -16.390 -26.860  7.00  0.00           H  
ATOM    288  H22  DG A   9      -8.557 -19.074 -23.010  5.00  0.00           H  
ATOM    289  H4'  DG A   9     -12.677 -15.185 -27.710  9.00  0.00           H  
ATOM    290  H5'  DG A   9     -13.376 -13.116 -26.710  1.00  0.00           H  
ATOM    291 H2''  DG A   9     -13.778 -17.950 -24.740  2.00  0.00           H  
ATOM    292 H5''  DG A   9     -14.755 -14.046 -27.320  4.00  0.00           H  
ATOM    293  P    DT A  10     -13.400 -18.931 -27.530  9.00  0.00           P  
ATOM    294  C5'  DT A  10     -11.126 -19.919 -26.710  3.00  0.00           C  
ATOM    295  O5'  DT A  10     -12.518 -19.842 -26.480  1.00  0.00           O  
ATOM    296  C4'  DT A  10     -10.317 -20.877 -25.860  1.00  0.00           C  
ATOM    297  O4'  DT A  10     -10.253 -20.365 -24.490  7.00  0.00           O  
ATOM    298  C3'  DT A  10     -10.813 -22.338 -25.730  1.00  0.00           C  
ATOM    299  O3'  DT A  10      -9.687 -23.207 -25.670  2.00  0.00           O  
ATOM    300  C2'  DT A  10     -11.625 -22.271 -24.370  3.00  0.00           C  
ATOM    301  C1'  DT A  10     -10.666 -21.370 -23.610  2.00  0.00           C  
ATOM    302  N1   DT A  10     -11.366 -20.614 -22.530  1.00  0.00           N  
ATOM    303  C2   DT A  10     -10.921 -20.882 -21.260  2.00  0.00           C  
ATOM    304  O2   DT A  10      -9.977 -21.668 -21.010  7.00  0.00           O  
ATOM    305  N3   DT A  10     -11.612 -20.248 -20.240  2.00  0.00           N  
ATOM    306  C4   DT A  10     -12.768 -19.487 -20.320  2.00  0.00           C  
ATOM    307  O4   DT A  10     -13.283 -18.984 -19.330  6.00  0.00           O  
ATOM    308  C5   DT A  10     -13.264 -19.333 -21.730  2.00  0.00           C  
ATOM    309  C6   DT A  10     -12.574 -19.936 -22.750  5.00  0.00           C  
ATOM    310  C7   DT A  10     -14.531 -18.521 -21.960  2.00  0.00           C  
ATOM    311  OP1  DT A  10     -12.936 -19.222 -28.910  3.00  0.00           O  
ATOM    312  OP2  DT A  10     -14.825 -19.160 -27.210  8.00  0.00           O1-
ATOM    313  H3   DT A  10     -11.220 -20.374 -19.290  9.00  0.00           H  
ATOM    314  H6   DT A  10     -13.033 -19.843 -23.720  5.00  0.00           H  
ATOM    315  H1'  DT A  10      -9.793 -22.001 -23.260  1.00  0.00           H  
ATOM    316  H2'  DT A  10     -12.559 -21.879 -24.620  5.00  0.00           H  
ATOM    317  H3'  DT A  10     -11.450 -22.691 -26.530  0.00  0.00           H  
ATOM    318  H4'  DT A  10      -9.271 -20.844 -26.220  7.00  0.00           H  
ATOM    319  H5'  DT A  10     -10.752 -18.940 -26.580  4.00  0.00           H  
ATOM    320  H71  DT A  10     -15.275 -18.819 -21.290  1.00  0.00           H  
ATOM    321  H72  DT A  10     -14.360 -17.442 -21.820  5.00  0.00           H  
ATOM    322  H73  DT A  10     -14.903 -18.651 -22.920  8.00  0.00           H  
ATOM    323 H2''  DT A  10     -11.696 -23.248 -23.900  3.00  0.00           H  
ATOM    324 H5''  DT A  10     -10.863 -20.285 -27.730  7.00  0.00           H  
ATOM    325  P    DT A  11      -9.799 -24.711 -25.660  3.00  0.00           P  
ATOM    326  C5'  DT A  11      -8.529 -25.406 -23.480  1.00  0.00           C  
ATOM    327  O5'  DT A  11      -9.730 -25.295 -24.180  5.00  0.00           O  
ATOM    328  C4'  DT A  11      -8.621 -25.854 -22.020  5.00  0.00           C  
ATOM    329  O4'  DT A  11      -9.556 -25.038 -21.370  2.00  0.00           O  
ATOM    330  C3'  DT A  11      -9.128 -27.323 -21.870  6.00  0.00           C  
ATOM    331  O3'  DT A  11      -8.127 -27.954 -21.040  2.00  0.00           O  
ATOM    332  C2'  DT A  11     -10.522 -27.126 -21.260  8.00  0.00           C  
ATOM    333  C1'  DT A  11     -10.410 -25.812 -20.520  1.00  0.00           C  
ATOM    334  N1   DT A  11     -11.657 -25.064 -20.300  6.00  0.00           N  
ATOM    335  C2   DT A  11     -11.855 -24.527 -19.040  8.00  0.00           C  
ATOM    336  O2   DT A  11     -11.228 -24.845 -18.040  7.00  0.00           O  
ATOM    337  N3   DT A  11     -12.847 -23.620 -18.890  9.00  0.00           N  
ATOM    338  C4   DT A  11     -13.732 -23.203 -19.840  7.00  0.00           C  
ATOM    339  O4   DT A  11     -14.663 -22.460 -19.500  9.00  0.00           O  
ATOM    340  C5   DT A  11     -13.514 -23.789 -21.180  4.00  0.00           C  
ATOM    341  C6   DT A  11     -12.476 -24.669 -21.380  1.00  0.00           C  
ATOM    342  C7   DT A  11     -14.482 -23.597 -22.330  2.00  0.00           C  
ATOM    343  OP1  DT A  11      -8.659 -25.167 -26.360  4.00  0.00           O  
ATOM    344  OP2  DT A  11     -11.121 -25.068 -26.260  8.00  0.00           O1-
ATOM    345  H3   DT A  11     -13.076 -23.195 -18.010  2.00  0.00           H  
ATOM    346  H6   DT A  11     -12.380 -25.153 -22.380  2.00  0.00           H  
ATOM    347  H1'  DT A  11      -9.877 -25.980 -19.520  3.00  0.00           H  
ATOM    348  H2'  DT A  11     -11.279 -27.036 -22.020  5.00  0.00           H  
ATOM    349  H3'  DT A  11      -9.098 -27.823 -22.850  8.00  0.00           H  
ATOM    350  H4'  DT A  11      -7.652 -25.663 -21.460  3.00  0.00           H  
ATOM    351  H5'  DT A  11      -8.079 -24.382 -23.510  8.00  0.00           H  
ATOM    352  H71  DT A  11     -14.543 -24.542 -22.810  9.00  0.00           H  
ATOM    353  H72  DT A  11     -15.520 -23.375 -21.980  0.00  0.00           H  
ATOM    354  H73  DT A  11     -14.220 -22.694 -22.940  3.00  0.00           H  
ATOM    355 H2''  DT A  11     -10.734 -27.937 -20.620  0.00  0.00           H  
ATOM    356 H5''  DT A  11      -7.869 -26.060 -24.010  1.00  0.00           H  
ATOM    357  P    DA A  12      -8.172 -29.596 -20.780  3.00  0.00           P  
ATOM    358  C5'  DA A  12      -6.174 -29.216 -19.020  4.00  0.00           C  
ATOM    359  O5'  DA A  12      -6.710 -29.832 -20.160  3.00  0.00           O  
ATOM    360  C4'  DA A  12      -4.682 -29.540 -18.670  5.00  0.00           C  
ATOM    361  O4'  DA A  12      -4.468 -28.792 -17.480  7.00  0.00           O  
ATOM    362  C3'  DA A  12      -4.171 -30.979 -18.470  9.00  0.00           C  
ATOM    363  O3'  DA A  12      -2.801 -31.233 -18.820  7.00  0.00           O  
ATOM    364  C2'  DA A  12      -4.337 -31.011 -16.940  8.00  0.00           C  
ATOM    365  C1'  DA A  12      -3.809 -29.586 -16.510  7.00  0.00           C  
ATOM    366  N1   DA A  12      -2.742 -27.987 -11.690  0.00  0.00           N  
ATOM    367  C2   DA A  12      -1.952 -28.371 -12.680  3.00  0.00           C  
ATOM    368  N3   DA A  12      -2.247 -28.743 -13.930  2.00  0.00           N  
ATOM    369  C4   DA A  12      -3.612 -28.704 -14.100  6.00  0.00           C  
ATOM    370  C5   DA A  12      -4.520 -28.243 -13.160  4.00  0.00           C  
ATOM    371  C6   DA A  12      -3.997 -27.861 -11.960  2.00  0.00           C  
ATOM    372  N6   DA A  12      -4.630 -27.570 -10.880  4.00  0.00           N  
ATOM    373  N7   DA A  12      -5.886 -28.371 -13.620  8.00  0.00           N  
ATOM    374  C8   DA A  12      -5.673 -28.871 -14.830  0.00  0.00           C  
ATOM    375  N9   DA A  12      -4.326 -29.104 -15.180  0.00  0.00           N  
ATOM    376  OP1  DA A  12      -8.344 -30.209 -22.100  7.00  0.00           O  
ATOM    377  OP2  DA A  12      -9.102 -29.838 -19.650  5.00  0.00           O1-
ATOM    378  H2   DA A  12      -0.873 -28.410 -12.380  3.00  0.00           H  
ATOM    379  H8   DA A  12      -6.474 -29.310 -15.370  2.00  0.00           H  
ATOM    380  H1'  DA A  12      -2.777 -29.502 -16.590  9.00  0.00           H  
ATOM    381  H2'  DA A  12      -5.448 -31.086 -16.700  0.00  0.00           H  
ATOM    382  H3'  DA A  12      -4.875 -31.685 -18.940  0.00  0.00           H  
ATOM    383  H4'  DA A  12      -4.039 -29.159 -19.440  1.00  0.00           H  
ATOM    384  H5'  DA A  12      -6.749 -29.530 -18.110  8.00  0.00           H  
ATOM    385  H61  DA A  12      -4.142 -27.095 -10.160  0.00  0.00           H  
ATOM    386  H62  DA A  12      -5.631 -27.578 -10.910  1.00  0.00           H  
ATOM    387 H2''  DA A  12      -3.787 -31.787 -16.550  9.00  0.00           H  
ATOM    388 H5''  DA A  12      -6.143 -28.102 -19.180  3.00  0.00           H  
ATOM    389  P    DG A  13      -2.138 -32.704 -18.810  2.00  0.00           P  
ATOM    390  C5'  DG A  13      -0.230 -31.825 -17.210  9.00  0.00           C  
ATOM    391  O5'  DG A  13      -1.311 -32.729 -17.410  3.00  0.00           O  
ATOM    392  C4'  DG A  13       0.373 -32.036 -15.780  1.00  0.00           C  
ATOM    393  O4'  DG A  13      -0.384 -31.466 -14.680  3.00  0.00           O  
ATOM    394  C3'  DG A  13       0.674 -33.576 -15.390  9.00  0.00           C  
ATOM    395  O3'  DG A  13       1.894 -33.638 -14.740  6.00  0.00           O  
ATOM    396  C2'  DG A  13      -0.569 -33.783 -14.540  6.00  0.00           C  
ATOM    397  C1'  DG A  13      -0.669 -32.484 -13.770  8.00  0.00           C  
ATOM    398  N1   DG A  13      -2.781 -30.656  -9.420  5.00  0.00           N  
ATOM    399  C2   DG A  13      -1.486 -30.660  -9.870  6.00  0.00           C  
ATOM    400  N2   DG A  13      -0.621 -29.986  -9.140  8.00  0.00           N  
ATOM    401  N3   DG A  13      -1.114 -31.116 -11.010  8.00  0.00           N  
ATOM    402  C4   DG A  13      -2.106 -31.548 -11.860  6.00  0.00           C  
ATOM    403  C5   DG A  13      -3.481 -31.413 -11.570  5.00  0.00           C  
ATOM    404  C6   DG A  13      -3.819 -30.930 -10.270  3.00  0.00           C  
ATOM    405  O6   DG A  13      -4.995 -30.786  -9.890  6.00  0.00           O  
ATOM    406  N7   DG A  13      -4.173 -31.888 -12.630  1.00  0.00           N  
ATOM    407  C8   DG A  13      -3.273 -32.390 -13.490  3.00  0.00           C  
ATOM    408  N9   DG A  13      -1.980 -32.209 -13.060  1.00  0.00           N  
ATOM    409  OP1  DG A  13      -1.152 -32.786 -19.850  7.00  0.00           O  
ATOM    410  OP2  DG A  13      -3.206 -33.704 -18.730  3.00  0.00           O1-
ATOM    411  H1   DG A  13      -3.000 -30.111  -8.650  3.00  0.00           H  
ATOM    412  H8   DG A  13      -3.600 -32.955 -14.410  6.00  0.00           H  
ATOM    413  H1'  DG A  13       0.181 -32.402 -13.030  1.00  0.00           H  
ATOM    414  H2'  DG A  13      -1.391 -33.874 -15.270  5.00  0.00           H  
ATOM    415  H21  DG A  13      -0.968 -29.522  -8.340  6.00  0.00           H  
ATOM    416  H3'  DG A  13       0.712 -34.217 -16.290  1.00  0.00           H  
ATOM    417  H22  DG A  13       0.299 -29.873  -9.470  7.00  0.00           H  
ATOM    418  H4'  DG A  13       1.322 -31.447 -15.810  6.00  0.00           H  
ATOM    419  H5'  DG A  13      -0.584 -30.755 -17.240  9.00  0.00           H  
ATOM    420 H2''  DG A  13      -0.511 -34.647 -13.860  9.00  0.00           H  
ATOM    421 H5''  DG A  13       0.499 -32.051 -18.010  1.00  0.00           H  
ATOM    422  P    DG A  14       2.394 -34.997 -14.040  9.00  0.00           P  
ATOM    423  C5'  DG A  14       2.605 -35.597 -11.520  2.00  0.00           C  
ATOM    424  O5'  DG A  14       2.034 -34.698 -12.510  1.00  0.00           O  
ATOM    425  C4'  DG A  14       2.326 -35.139 -10.080  1.00  0.00           C  
ATOM    426  O4'  DG A  14       0.955 -35.113  -9.700  4.00  0.00           O  
ATOM    427  C3'  DG A  14       2.958 -33.800  -9.680  6.00  0.00           C  
ATOM    428  O3'  DG A  14       3.320 -33.851  -8.260  7.00  0.00           O  
ATOM    429  C2'  DG A  14       1.724 -32.925  -9.940  7.00  0.00           C  
ATOM    430  C1'  DG A  14       0.444 -33.827  -9.810  6.00  0.00           C  
ATOM    431  N1   DG A  14      -4.327 -34.112  -8.060  5.00  0.00           N  
ATOM    432  C2   DG A  14      -3.738 -34.422  -9.210  9.00  0.00           C  
ATOM    433  N2   DG A  14      -4.450 -34.974 -10.140  7.00  0.00           N  
ATOM    434  N3   DG A  14      -2.418 -34.232  -9.530  0.00  0.00           N  
ATOM    435  C4   DG A  14      -1.680 -33.731  -8.530  9.00  0.00           C  
ATOM    436  C5   DG A  14      -2.197 -33.380  -7.310  2.00  0.00           C  
ATOM    437  C6   DG A  14      -3.608 -33.628  -6.980  3.00  0.00           C  
ATOM    438  O6   DG A  14      -4.210 -33.452  -5.910  6.00  0.00           O  
ATOM    439  N7   DG A  14      -1.113 -32.785  -6.620  8.00  0.00           N  
ATOM    440  C8   DG A  14      -0.052 -33.016  -7.320  5.00  0.00           C  
ATOM    441  N9   DG A  14      -0.329 -33.569  -8.550  0.00  0.00           N  
ATOM    442  OP1  DG A  14       3.800 -34.955 -14.180  6.00  0.00           O  
ATOM    443  OP2  DG A  14       1.619 -36.124 -14.560  2.00  0.00           O1-
ATOM    444  H1   DG A  14      -5.209 -34.479  -7.750  3.00  0.00           H  
ATOM    445  H8   DG A  14       0.963 -32.660  -7.080  6.00  0.00           H  
ATOM    446  H1'  DG A  14      -0.197 -33.758 -10.650  4.00  0.00           H  
ATOM    447  H2'  DG A  14       1.693 -32.087  -9.260  0.00  0.00           H  
ATOM    448  H21  DG A  14      -5.371 -35.215  -9.990  7.00  0.00           H  
ATOM    449  H3'  DG A  14       3.748 -33.556 -10.390  9.00  0.00           H  
ATOM    450  H22  DG A  14      -4.028 -35.126 -11.060  0.00  0.00           H  
ATOM    451  H4'  DG A  14       2.695 -35.875  -9.400  8.00  0.00           H  
ATOM    452  H5'  DG A  14       3.664 -35.649 -11.630  2.00  0.00           H  
ATOM    453 H2''  DG A  14       1.797 -32.616 -10.960  2.00  0.00           H  
ATOM    454 H5''  DG A  14       2.081 -36.615 -11.560  2.00  0.00           H  
ATOM    455  P    DG A  15       4.850 -33.876  -7.820  9.00  0.00           P  
ATOM    456  C5'  DG A  15       4.606 -32.704  -5.560  8.00  0.00           C  
ATOM    457  O5'  DG A  15       4.821 -33.905  -6.220  5.00  0.00           O  
ATOM    458  C4'  DG A  15       4.002 -32.905  -4.200  2.00  0.00           C  
ATOM    459  O4'  DG A  15       2.565 -33.090  -4.160  9.00  0.00           O  
ATOM    460  C3'  DG A  15       4.691 -34.043  -3.460  0.00  0.00           C  
ATOM    461  O3'  DG A  15       4.928 -33.738  -2.090  6.00  0.00           O  
ATOM    462  C2'  DG A  15       3.573 -35.160  -3.540  8.00  0.00           C  
ATOM    463  C1'  DG A  15       2.240 -34.409  -3.710  9.00  0.00           C  
ATOM    464  N1   DG A  15      -2.472 -36.109  -4.670  9.00  0.00           N  
ATOM    465  C2   DG A  15      -1.905 -35.588  -3.540  3.00  0.00           C  
ATOM    466  N2   DG A  15      -2.608 -35.530  -2.460  5.00  0.00           N  
ATOM    467  N3   DG A  15      -0.653 -35.218  -3.400  5.00  0.00           N  
ATOM    468  C4   DG A  15       0.040 -35.342  -4.550  8.00  0.00           C  
ATOM    469  C5   DG A  15      -0.358 -35.878  -5.770  3.00  0.00           C  
ATOM    470  C6   DG A  15      -1.754 -36.247  -5.850  6.00  0.00           C  
ATOM    471  O6   DG A  15      -2.328 -36.586  -6.870  8.00  0.00           O  
ATOM    472  N7   DG A  15       0.654 -35.955  -6.710  8.00  0.00           N  
ATOM    473  C8   DG A  15       1.681 -35.604  -5.950  9.00  0.00           C  
ATOM    474  N9   DG A  15       1.358 -35.071  -4.680  8.00  0.00           N  
ATOM    475  OP1  DG A  15       5.508 -32.605  -8.310  1.00  0.00           O  
ATOM    476  OP2  DG A  15       5.418 -35.163  -8.210  3.00  0.00           O1-
ATOM    477  H1   DG A  15      -3.454 -36.443  -4.580  6.00  0.00           H  
ATOM    478  H8   DG A  15       2.656 -35.446  -6.480  1.00  0.00           H  
ATOM    479  H1'  DG A  15       1.745 -34.399  -2.740  1.00  0.00           H  
ATOM    480  H2'  DG A  15       3.771 -35.873  -4.280  6.00  0.00           H  
ATOM    481  H21  DG A  15      -3.695 -35.720  -2.520  7.00  0.00           H  
ATOM    482  H3'  DG A  15       5.637 -34.406  -3.940  0.00  0.00           H  
ATOM    483  H22  DG A  15      -2.167 -35.531  -1.560  9.00  0.00           H  
ATOM    484  H4'  DG A  15       4.316 -31.981  -3.590  4.00  0.00           H  
ATOM    485  H5'  DG A  15       3.808 -32.239  -6.140  6.00  0.00           H  
ATOM    486 H2''  DG A  15       3.480 -35.664  -2.550  6.00  0.00           H  
ATOM    487 H5''  DG A  15       5.558 -32.173  -5.650  5.00  0.00           H  
ATOM    488  P    DT A  16       5.966 -34.622  -1.260  9.00  0.00           P  
ATOM    489  C5'  DT A  16       5.919 -36.925  -0.070  1.00  0.00           C  
ATOM    490  O5'  DT A  16       5.230 -35.988  -0.900  9.00  0.00           O  
ATOM    491  C4'  DT A  16       5.013 -37.433   1.060  9.00  0.00           C  
ATOM    492  O4'  DT A  16       5.788 -38.232   1.940  7.00  0.00           O  
ATOM    493  C3'  DT A  16       4.481 -36.309   1.930  0.00  0.00           C  
ATOM    494  O3'  DT A  16       3.208 -36.506   2.510  5.00  0.00           O  
ATOM    495  C2'  DT A  16       5.419 -36.281   3.070  4.00  0.00           C  
ATOM    496  C1'  DT A  16       5.885 -37.707   3.240  9.00  0.00           C  
ATOM    497  N1   DT A  16       7.222 -37.852   3.860  3.00  0.00           N  
ATOM    498  C2   DT A  16       7.416 -38.781   4.860  2.00  0.00           C  
ATOM    499  O2   DT A  16       6.607 -39.617   5.180  4.00  0.00           O  
ATOM    500  N3   DT A  16       8.601 -38.923   5.510  5.00  0.00           N  
ATOM    501  C4   DT A  16       9.742 -38.124   5.170  5.00  0.00           C  
ATOM    502  O4   DT A  16      10.796 -38.211   5.780  6.00  0.00           O  
ATOM    503  C5   DT A  16       9.515 -37.133   4.060  5.00  0.00           C  
ATOM    504  C6   DT A  16       8.324 -37.045   3.450  6.00  0.00           C  
ATOM    505  C7   DT A  16      10.650 -36.255   3.610  4.00  0.00           C  
ATOM    506  OP1  DT A  16       6.157 -33.879  -0.010  9.00  0.00           O  
ATOM    507  OP2  DT A  16       7.118 -34.989  -2.140  0.00  0.00           O1-
ATOM    508  H3   DT A  16       8.758 -39.774   6.060  5.00  0.00           H  
ATOM    509  H6   DT A  16       8.160 -36.362   2.670  2.00  0.00           H  
ATOM    510  H1'  DT A  16       5.078 -38.258   3.830  8.00  0.00           H  
ATOM    511  H2'  DT A  16       6.223 -35.628   2.700  6.00  0.00           H  
ATOM    512  H3'  DT A  16       4.523 -35.405   1.340  3.00  0.00           H  
ATOM    513  H4'  DT A  16       4.176 -37.971   0.560  4.00  0.00           H  
ATOM    514  H5'  DT A  16       6.847 -36.444   0.330  6.00  0.00           H  
ATOM    515  H71  DT A  16      10.372 -35.449   2.920  0.00  0.00           H  
ATOM    516  H72  DT A  16      10.967 -35.771   4.540  4.00  0.00           H  
ATOM    517  H73  DT A  16      11.455 -36.804   3.280  3.00  0.00           H  
ATOM    518 H2''  DT A  16       4.898 -35.903   3.900  1.00  0.00           H  
ATOM    519 H5''  DT A  16       6.106 -37.819  -0.650  1.00  0.00           H  
ATOM    520  P    DT A  17       2.343 -35.299   3.100  4.00  0.00           P  
ATOM    521  C5'  DT A  17       0.548 -35.831   1.370  7.00  0.00           C  
ATOM    522  O5'  DT A  17       0.912 -35.814   2.670  1.00  0.00           O  
ATOM    523  C4'  DT A  17      -0.930 -36.346   1.270  6.00  0.00           C  
ATOM    524  O4'  DT A  17      -1.189 -36.576  -0.090  1.00  0.00           O  
ATOM    525  C3'  DT A  17      -1.019 -37.755   1.970  6.00  0.00           C  
ATOM    526  O3'  DT A  17      -2.245 -38.012   2.570  8.00  0.00           O  
ATOM    527  C2'  DT A  17      -0.923 -38.724   0.790  9.00  0.00           C  
ATOM    528  C1'  DT A  17      -1.774 -37.882  -0.110  9.00  0.00           C  
ATOM    529  N1   DT A  17      -1.730 -38.399  -1.460  9.00  0.00           N  
ATOM    530  C2   DT A  17      -2.881 -38.895  -2.090  3.00  0.00           C  
ATOM    531  O2   DT A  17      -3.993 -38.949  -1.520  5.00  0.00           O  
ATOM    532  N3   DT A  17      -2.777 -39.492  -3.360  2.00  0.00           N  
ATOM    533  C4   DT A  17      -1.615 -39.500  -4.130  8.00  0.00           C  
ATOM    534  O4   DT A  17      -1.599 -39.838  -5.270  8.00  0.00           O  
ATOM    535  C5   DT A  17      -0.476 -38.971  -3.420  9.00  0.00           C  
ATOM    536  C6   DT A  17      -0.568 -38.444  -2.130  6.00  0.00           C  
ATOM    537  C7   DT A  17       0.863 -39.021  -4.100  5.00  0.00           C  
ATOM    538  OP1  DT A  17       2.632 -34.088   2.350  2.00  0.00           O  
ATOM    539  OP2  DT A  17       2.338 -35.248   4.580  7.00  0.00           O1-
ATOM    540  H3   DT A  17      -3.585 -39.690  -3.860  6.00  0.00           H  
ATOM    541  H6   DT A  17       0.322 -38.185  -1.630  4.00  0.00           H  
ATOM    542  H1'  DT A  17      -2.795 -37.777   0.180  8.00  0.00           H  
ATOM    543  H2'  DT A  17       0.175 -38.904   0.550  2.00  0.00           H  
ATOM    544  H3'  DT A  17      -0.144 -37.923   2.640  9.00  0.00           H  
ATOM    545  H4'  DT A  17      -1.673 -35.676   1.690  7.00  0.00           H  
ATOM    546  H5'  DT A  17       1.105 -36.533   0.760  2.00  0.00           H  
ATOM    547  H71  DT A  17       0.777 -38.763  -5.140  2.00  0.00           H  
ATOM    548  H72  DT A  17       1.210 -40.020  -3.960  4.00  0.00           H  
ATOM    549  H73  DT A  17       1.553 -38.280  -3.610  4.00  0.00           H  
ATOM    550 H2''  DT A  17      -1.515 -39.665   1.030  5.00  0.00           H  
ATOM    551 H5''  DT A  17       0.563 -34.796   1.000  6.00  0.00           H  
ATOM    552  P    DA A  18      -2.464 -38.808   3.920  9.00  0.00           P  
ATOM    553  C5'  DA A  18      -4.409 -37.031   4.020  6.00  0.00           C  
ATOM    554  O5'  DA A  18      -3.966 -38.409   4.200  7.00  0.00           O  
ATOM    555  C4'  DA A  18      -5.961 -36.869   3.700  3.00  0.00           C  
ATOM    556  O4'  DA A  18      -6.357 -37.428   2.450  2.00  0.00           O  
ATOM    557  C3'  DA A  18      -6.871 -37.637   4.690  1.00  0.00           C  
ATOM    558  O3'  DA A  18      -7.908 -36.801   5.150  1.00  0.00           O  
ATOM    559  C2'  DA A  18      -7.510 -38.751   3.800  6.00  0.00           C  
ATOM    560  C1'  DA A  18      -7.631 -37.923   2.550  0.00  0.00           C  
ATOM    561  N1   DA A  18     -10.663 -41.380   0.240  1.00  0.00           N  
ATOM    562  C2   DA A  18     -10.776 -40.756   1.430  1.00  0.00           C  
ATOM    563  N3   DA A  18      -9.965 -39.875   1.980  9.00  0.00           N  
ATOM    564  C4   DA A  18      -8.852 -39.600   1.190  9.00  0.00           C  
ATOM    565  C5   DA A  18      -8.625 -40.156  -0.060  1.00  0.00           C  
ATOM    566  C6   DA A  18      -9.611 -41.048  -0.520  8.00  0.00           C  
ATOM    567  N6   DA A  18      -9.633 -41.701  -1.640  0.00  0.00           N  
ATOM    568  N7   DA A  18      -7.400 -39.743  -0.550  2.00  0.00           N  
ATOM    569  C8   DA A  18      -7.010 -38.858   0.290  6.00  0.00           C  
ATOM    570  N9   DA A  18      -7.813 -38.733   1.380  7.00  0.00           N  
ATOM    571  OP1  DA A  18      -1.568 -38.328   5.020  1.00  0.00           O  
ATOM    572  OP2  DA A  18      -2.498 -40.262   3.630  6.00  0.00           O1-
ATOM    573  H2   DA A  18     -11.702 -41.006   2.020  8.00  0.00           H  
ATOM    574  H8   DA A  18      -6.049 -38.354   0.270  4.00  0.00           H  
ATOM    575  H1'  DA A  18      -8.375 -37.164   2.530  8.00  0.00           H  
ATOM    576  H2'  DA A  18      -6.795 -39.610   3.780  0.00  0.00           H  
ATOM    577  H3'  DA A  18      -6.317 -38.137   5.430  6.00  0.00           H  
ATOM    578  H4'  DA A  18      -6.259 -35.880   3.630  3.00  0.00           H  
ATOM    579  H5'  DA A  18      -3.906 -36.525   3.170  8.00  0.00           H  
ATOM    580  H61  DA A  18     -10.503 -42.104  -1.880  9.00  0.00           H  
ATOM    581  H62  DA A  18      -9.022 -41.396  -2.340  1.00  0.00           H  
ATOM    582 H2''  DA A  18      -8.491 -39.101   4.130  3.00  0.00           H  
ATOM    583 H5''  DA A  18      -4.175 -36.322   4.870  7.00  0.00           H  
ATOM    584  P    DG A  19      -7.810 -36.036   6.510  7.00  0.00           P  
ATOM    585  C5'  DG A  19      -6.798 -33.811   5.560  5.00  0.00           C  
ATOM    586  O5'  DG A  19      -6.653 -35.074   6.210  5.00  0.00           O  
ATOM    587  C4'  DG A  19      -5.377 -33.304   5.550  6.00  0.00           C  
ATOM    588  O4'  DG A  19      -4.587 -33.817   4.450  5.00  0.00           O  
ATOM    589  C3'  DG A  19      -5.350 -31.807   5.280  8.00  0.00           C  
ATOM    590  O3'  DG A  19      -4.177 -31.138   5.730  2.00  0.00           O  
ATOM    591  C2'  DG A  19      -5.588 -31.683   3.770  3.00  0.00           C  
ATOM    592  C1'  DG A  19      -4.513 -32.783   3.490  8.00  0.00           C  
ATOM    593  N1   DG A  19      -6.887 -35.613  -0.070  7.00  0.00           N  
ATOM    594  C2   DG A  19      -7.399 -34.988   0.990  2.00  0.00           C  
ATOM    595  N2   DG A  19      -8.682 -35.154   1.240  9.00  0.00           N  
ATOM    596  N3   DG A  19      -6.791 -34.109   1.770  9.00  0.00           N  
ATOM    597  C4   DG A  19      -5.465 -33.980   1.450  0.00  0.00           C  
ATOM    598  C5   DG A  19      -4.830 -34.549   0.320  6.00  0.00           C  
ATOM    599  C6   DG A  19      -5.614 -35.434  -0.530  5.00  0.00           C  
ATOM    600  O6   DG A  19      -5.236 -36.000  -1.580  1.00  0.00           O  
ATOM    601  N7   DG A  19      -3.505 -34.070   0.200  1.00  0.00           N  
ATOM    602  C8   DG A  19      -3.357 -33.364   1.300  1.00  0.00           C  
ATOM    603  N9   DG A  19      -4.475 -33.293   2.150  1.00  0.00           N  
ATOM    604  OP1  DG A  19      -7.484 -37.063   7.500  3.00  0.00           O  
ATOM    605  OP2  DG A  19      -9.048 -35.312   6.650  2.00  0.00           O1-
ATOM    606  H1   DG A  19      -7.497 -36.127  -0.700  0.00  0.00           H  
ATOM    607  H8   DG A  19      -2.493 -32.893   1.570  6.00  0.00           H  
ATOM    608  H1'  DG A  19      -3.567 -32.249   3.560  4.00  0.00           H  
ATOM    609  H2'  DG A  19      -6.624 -31.933   3.620  7.00  0.00           H  
ATOM    610  H21  DG A  19      -9.256 -35.728   0.640  7.00  0.00           H  
ATOM    611  H3'  DG A  19      -6.225 -31.363   5.790  8.00  0.00           H  
ATOM    612  H22  DG A  19      -9.058 -34.913   2.180  2.00  0.00           H  
ATOM    613  H4'  DG A  19      -4.904 -33.407   6.550  0.00  0.00           H  
ATOM    614  H5'  DG A  19      -7.422 -33.191   6.200  7.00  0.00           H  
ATOM    615 H2''  DG A  19      -5.310 -30.715   3.380  3.00  0.00           H  
ATOM    616 H5''  DG A  19      -7.105 -33.945   4.490  1.00  0.00           H  
ATOM    617  P    DG A  20      -3.931 -29.531   5.730  3.00  0.00           P  
ATOM    618  C5'  DG A  20      -2.397 -29.189   3.630  1.00  0.00           C  
ATOM    619  O5'  DG A  20      -3.666 -29.073   4.240  0.00  0.00           O  
ATOM    620  C4'  DG A  20      -2.478 -28.903   2.120  3.00  0.00           C  
ATOM    621  O4'  DG A  20      -3.075 -30.028   1.400  1.00  0.00           O  
ATOM    622  C3'  DG A  20      -3.268 -27.620   1.750  1.00  0.00           C  
ATOM    623  O3'  DG A  20      -2.469 -26.816   0.900  8.00  0.00           O  
ATOM    624  C2'  DG A  20      -4.429 -28.264   0.980  4.00  0.00           C  
ATOM    625  C1'  DG A  20      -3.909 -29.534   0.330  4.00  0.00           C  
ATOM    626  N1   DG A  20      -4.945 -32.806  -3.450  2.00  0.00           N  
ATOM    627  C2   DG A  20      -3.847 -32.020  -3.210  7.00  0.00           C  
ATOM    628  N2   DG A  20      -2.769 -32.010  -4.000  5.00  0.00           N  
ATOM    629  N3   DG A  20      -3.722 -31.221  -2.190  6.00  0.00           N  
ATOM    630  C4   DG A  20      -4.769 -31.244  -1.380  6.00  0.00           C  
ATOM    631  C5   DG A  20      -5.942 -32.006  -1.490  7.00  0.00           C  
ATOM    632  C6   DG A  20      -6.111 -32.802  -2.670  8.00  0.00           C  
ATOM    633  O6   DG A  20      -6.956 -33.556  -3.070  7.00  0.00           O  
ATOM    634  N7   DG A  20      -6.712 -31.647  -0.420  8.00  0.00           N  
ATOM    635  C8   DG A  20      -6.076 -30.778   0.260  4.00  0.00           C  
ATOM    636  N9   DG A  20      -4.890 -30.478  -0.250  5.00  0.00           N  
ATOM    637  OP1  DG A  20      -2.677 -29.352   6.560  7.00  0.00           O  
ATOM    638  OP2  DG A  20      -5.245 -28.899   6.060  5.00  0.00           O1-
ATOM    639  H1   DG A  20      -4.802 -33.397  -4.230  8.00  0.00           H  
ATOM    640  H8   DG A  20      -6.434 -30.341   1.140  6.00  0.00           H  
ATOM    641  H1'  DG A  20      -3.329 -29.110  -0.500  6.00  0.00           H  
ATOM    642  H2'  DG A  20      -5.152 -28.389   1.740  7.00  0.00           H  
ATOM    643  H21  DG A  20      -2.644 -32.514  -4.830  2.00  0.00           H  
ATOM    644  H3'  DG A  20      -3.541 -27.090   2.620  6.00  0.00           H  
ATOM    645  H22  DG A  20      -1.982 -31.660  -3.510  9.00  0.00           H  
ATOM    646  H4'  DG A  20      -1.427 -28.840   1.780  0.00  0.00           H  
ATOM    647  H5'  DG A  20      -1.971 -30.172   3.760  1.00  0.00           H  
ATOM    648 H2''  DG A  20      -4.789 -27.524   0.300  5.00  0.00           H  
ATOM    649 H5''  DG A  20      -1.799 -28.426   4.190  9.00  0.00           H  
ATOM    650  P    DG A  21      -1.374 -25.848   1.480  0.00  0.00           P  
ATOM    651  C5'  DG A  21      -0.140 -26.393  -0.810  0.00  0.00           C  
ATOM    652  O5'  DG A  21      -0.498 -25.460   0.230  2.00  0.00           O  
ATOM    653  C4'  DG A  21       0.787 -25.745  -1.800  4.00  0.00           C  
ATOM    654  O4'  DG A  21       1.326 -26.750  -2.690  6.00  0.00           O  
ATOM    655  C3'  DG A  21       0.038 -24.780  -2.640  5.00  0.00           C  
ATOM    656  O3'  DG A  21      -0.092 -23.538  -2.000  4.00  0.00           O  
ATOM    657  C2'  DG A  21       0.847 -24.763  -3.950  0.00  0.00           C  
ATOM    658  C1'  DG A  21       1.367 -26.198  -4.020  7.00  0.00           C  
ATOM    659  N1   DG A  21      -3.268 -28.357  -4.840  9.00  0.00           N  
ATOM    660  C2   DG A  21      -2.815 -27.761  -3.770  7.00  0.00           C  
ATOM    661  N2   DG A  21      -3.596 -27.629  -2.730  0.00  0.00           N  
ATOM    662  N3   DG A  21      -1.623 -27.280  -3.650  4.00  0.00           N  
ATOM    663  C4   DG A  21      -0.797 -27.401  -4.750  8.00  0.00           C  
ATOM    664  C5   DG A  21      -1.116 -28.084  -5.910  3.00  0.00           C  
ATOM    665  C6   DG A  21      -2.471 -28.614  -6.010  4.00  0.00           C  
ATOM    666  O6   DG A  21      -3.036 -29.228  -6.930  0.00  0.00           O  
ATOM    667  N7   DG A  21      -0.056 -28.312  -6.750  4.00  0.00           N  
ATOM    668  C8   DG A  21       0.909 -27.570  -6.110  0.00  0.00           C  
ATOM    669  N9   DG A  21       0.507 -26.993  -4.920  5.00  0.00           N  
ATOM    670  OP1  DG A  21      -0.507 -26.582   2.360  5.00  0.00           O  
ATOM    671  OP2  DG A  21      -1.983 -24.556   1.920  8.00  0.00           O1-
ATOM    672  H1   DG A  21      -4.020 -28.989  -4.670  4.00  0.00           H  
ATOM    673  H8   DG A  21       1.930 -27.520  -6.480  0.00  0.00           H  
ATOM    674  H1'  DG A  21       2.334 -26.192  -4.490  3.00  0.00           H  
ATOM    675  H2'  DG A  21       0.197 -24.528  -4.860  5.00  0.00           H  
ATOM    676  H21  DG A  21      -4.598 -27.792  -2.750  2.00  0.00           H  
ATOM    677  H3'  DG A  21      -0.902 -25.162  -2.820  7.00  0.00           H  
ATOM    678  H22  DG A  21      -3.235 -26.962  -1.970  8.00  0.00           H  
ATOM    679  H4'  DG A  21       1.580 -25.251  -1.210  1.00  0.00           H  
ATOM    680  H5'  DG A  21      -1.030 -26.718  -1.310  7.00  0.00           H  
ATOM    681 H2''  DG A  21       1.688 -24.101  -3.920  8.00  0.00           H  
ATOM    682 H5''  DG A  21       0.422 -27.252  -0.420  7.00  0.00           H  
ATOM    683  P    DT A  22      -0.798 -22.335  -2.700  0.00  0.00           P  
ATOM    684  C5'  DT A  22      -2.949 -22.003  -4.180  5.00  0.00           C  
ATOM    685  O5'  DT A  22      -1.955 -22.893  -3.610  7.00  0.00           O  
ATOM    686  C4'  DT A  22      -3.828 -22.645  -5.240  7.00  0.00           C  
ATOM    687  O4'  DT A  22      -3.028 -22.903  -6.430  4.00  0.00           O  
ATOM    688  C3'  DT A  22      -4.501 -23.970  -4.760  2.00  0.00           C  
ATOM    689  O3'  DT A  22      -5.870 -24.104  -5.150  7.00  0.00           O  
ATOM    690  C2'  DT A  22      -3.658 -25.020  -5.480  5.00  0.00           C  
ATOM    691  C1'  DT A  22      -3.332 -24.257  -6.790  1.00  0.00           C  
ATOM    692  N1   DT A  22      -2.250 -24.978  -7.550  1.00  0.00           N  
ATOM    693  C2   DT A  22      -2.541 -26.072  -8.380  3.00  0.00           C  
ATOM    694  O2   DT A  22      -3.679 -26.462  -8.490  4.00  0.00           O  
ATOM    695  N3   DT A  22      -1.572 -26.718  -9.070  6.00  0.00           N  
ATOM    696  C4   DT A  22      -0.239 -26.288  -9.070  5.00  0.00           C  
ATOM    697  O4   DT A  22       0.542 -26.955  -9.730  2.00  0.00           O  
ATOM    698  C5   DT A  22      -0.001 -25.155  -8.220  4.00  0.00           C  
ATOM    699  C6   DT A  22      -0.970 -24.542  -7.460  5.00  0.00           C  
ATOM    700  C7   DT A  22       1.314 -24.536  -8.340  0.00  0.00           C  
ATOM    701  OP1  DT A  22       0.275 -21.682  -3.510  1.00  0.00           O  
ATOM    702  OP2  DT A  22      -1.378 -21.588  -1.580  2.00  0.00           O1-
ATOM    703  H3   DT A  22      -1.826 -27.352  -9.790  7.00  0.00           H  
ATOM    704  H6   DT A  22      -0.693 -23.800  -6.760  3.00  0.00           H  
ATOM    705  H1'  DT A  22      -4.196 -24.187  -7.460  1.00  0.00           H  
ATOM    706  H2'  DT A  22      -2.762 -25.187  -4.900  5.00  0.00           H  
ATOM    707  H3'  DT A  22      -4.430 -24.072  -3.670  2.00  0.00           H  
ATOM    708  H4'  DT A  22      -4.650 -21.971  -5.410  2.00  0.00           H  
ATOM    709  H5'  DT A  22      -2.403 -21.180  -4.640  4.00  0.00           H  
ATOM    710  H71  DT A  22       1.495 -24.260  -9.370  0.00  0.00           H  
ATOM    711  H72  DT A  22       1.398 -23.736  -7.670  6.00  0.00           H  
ATOM    712  H73  DT A  22       2.024 -25.198  -7.920  2.00  0.00           H  
ATOM    713 H2''  DT A  22      -4.163 -25.957  -5.700  8.00  0.00           H  
ATOM    714 H5''  DT A  22      -3.574 -21.555  -3.380  2.00  0.00           H  
ATOM    715  P    DT A  23      -7.111 -23.437  -4.320  2.00  0.00           P  
ATOM    716  C5'  DT A  23      -9.532 -22.782  -4.900  1.00  0.00           C  
ATOM    717  O5'  DT A  23      -8.347 -23.415  -5.300  8.00  0.00           O  
ATOM    718  C4'  DT A  23     -10.749 -22.905  -5.810  6.00  0.00           C  
ATOM    719  O4'  DT A  23     -10.202 -22.732  -7.130  7.00  0.00           O  
ATOM    720  C3'  DT A  23     -11.500 -24.225  -5.870  1.00  0.00           C  
ATOM    721  O3'  DT A  23     -12.891 -23.923  -6.140  8.00  0.00           O  
ATOM    722  C2'  DT A  23     -10.718 -25.006  -6.940  7.00  0.00           C  
ATOM    723  C1'  DT A  23     -10.559 -23.792  -7.910  4.00  0.00           C  
ATOM    724  N1   DT A  23      -9.550 -24.118  -8.970  2.00  0.00           N  
ATOM    725  C2   DT A  23     -10.123 -24.467 -10.200  4.00  0.00           C  
ATOM    726  O2   DT A  23     -11.276 -24.352 -10.580  8.00  0.00           O  
ATOM    727  N3   DT A  23      -9.284 -25.080 -11.100  8.00  0.00           N  
ATOM    728  C4   DT A  23      -7.924 -25.145 -10.960  7.00  0.00           C  
ATOM    729  O4   DT A  23      -7.306 -25.618 -11.930  3.00  0.00           O  
ATOM    730  C5   DT A  23      -7.343 -24.581  -9.710  1.00  0.00           C  
ATOM    731  C6   DT A  23      -8.218 -24.190  -8.780  0.00  0.00           C  
ATOM    732  C7   DT A  23      -5.851 -24.485  -9.490  5.00  0.00           C  
ATOM    733  OP1  DT A  23      -6.741 -22.020  -4.020  1.00  0.00           O  
ATOM    734  OP2  DT A  23      -7.387 -24.302  -3.100  2.00  0.00           O1-
ATOM    735  H3   DT A  23      -9.574 -25.449 -11.930  9.00  0.00           H  
ATOM    736  H6   DT A  23      -7.854 -23.785  -7.860  9.00  0.00           H  
ATOM    737  H1'  DT A  23     -11.561 -23.526  -8.280  3.00  0.00           H  
ATOM    738  H2'  DT A  23      -9.726 -25.402  -6.500  4.00  0.00           H  
ATOM    739  H3'  DT A  23     -11.341 -24.790  -5.020  0.00  0.00           H  
ATOM    740  H4'  DT A  23     -11.455 -22.088  -5.530  3.00  0.00           H  
ATOM    741  H5'  DT A  23      -9.306 -21.762  -4.710  7.00  0.00           H  
ATOM    742  H71  DT A  23      -5.303 -24.834 -10.340  1.00  0.00           H  
ATOM    743  H72  DT A  23      -5.674 -23.345  -9.430  4.00  0.00           H  
ATOM    744  H73  DT A  23      -5.571 -25.071  -8.560  8.00  0.00           H  
ATOM    745 H2''  DT A  23     -11.258 -25.836  -7.370  3.00  0.00           H  
ATOM    746 H5''  DT A  23      -9.814 -23.314  -3.930  0.00  0.00           H  
ATOM    747  P    DA A  24     -14.087 -24.892  -5.600  3.00  0.00           P  
ATOM    748  C5'  DA A  24     -14.953 -25.747  -7.980  0.00  0.00           C  
ATOM    749  O5'  DA A  24     -14.313 -26.041  -6.740  1.00  0.00           O  
ATOM    750  C4'  DA A  24     -14.733 -26.659  -9.140  7.00  0.00           C  
ATOM    751  O4'  DA A  24     -13.476 -26.590  -9.770  0.00  0.00           O  
ATOM    752  C3'  DA A  24     -14.898 -28.088  -8.650  0.00  0.00           C  
ATOM    753  O3'  DA A  24     -15.817 -28.839  -9.460  9.00  0.00           O  
ATOM    754  C2'  DA A  24     -13.566 -28.699  -8.940  8.00  0.00           C  
ATOM    755  C1'  DA A  24     -13.178 -27.927 -10.200  7.00  0.00           C  
ATOM    756  N1   DA A  24      -8.186 -28.853  -9.020  9.00  0.00           N  
ATOM    757  C2   DA A  24      -9.203 -28.500  -8.200  0.00  0.00           C  
ATOM    758  N3   DA A  24     -10.448 -28.216  -8.540  4.00  0.00           N  
ATOM    759  C4   DA A  24     -10.630 -28.246  -9.930  9.00  0.00           C  
ATOM    760  C5   DA A  24      -9.629 -28.434 -10.840  8.00  0.00           C  
ATOM    761  C6   DA A  24      -8.408 -28.884 -10.290  5.00  0.00           C  
ATOM    762  N6   DA A  24      -7.402 -29.287 -11.050  7.00  0.00           N  
ATOM    763  N7   DA A  24     -10.089 -28.490 -12.180  8.00  0.00           N  
ATOM    764  C8   DA A  24     -11.359 -28.158 -11.990  9.00  0.00           C  
ATOM    765  N9   DA A  24     -11.759 -28.045 -10.700  7.00  0.00           N  
ATOM    766  OP1  DA A  24     -15.205 -23.967  -5.460  5.00  0.00           O  
ATOM    767  OP2  DA A  24     -13.618 -25.497  -4.310  7.00  0.00           O1-
ATOM    768  H2   DA A  24      -9.019 -28.547  -7.130  5.00  0.00           H  
ATOM    769  H8   DA A  24     -12.100 -28.058 -12.830  5.00  0.00           H  
ATOM    770  H1'  DA A  24     -13.779 -28.254 -11.030  5.00  0.00           H  
ATOM    771  H2'  DA A  24     -12.988 -28.293  -8.090  0.00  0.00           H  
ATOM    772  H3'  DA A  24     -15.147 -28.103  -7.640  8.00  0.00           H  
ATOM    773  H4'  DA A  24     -15.478 -26.513  -9.940  2.00  0.00           H  
ATOM    774  H5'  DA A  24     -14.606 -24.773  -8.350  3.00  0.00           H  
ATOM    775  H61  DA A  24      -6.681 -29.852 -10.580  3.00  0.00           H  
ATOM    776  H62  DA A  24      -7.506 -29.238 -12.050  4.00  0.00           H  
ATOM    777 H2''  DA A  24     -13.593 -29.782  -8.950  4.00  0.00           H  
ATOM    778 H5''  DA A  24     -16.035 -25.660  -7.840  4.00  0.00           H  
ATOM    779  P    DG A  25     -16.593 -30.145  -8.880  6.00  0.00           P  
ATOM    780  C5'  DG A  25     -15.327 -31.627 -10.460  2.00  0.00           C  
ATOM    781  O5'  DG A  25     -15.528 -31.280  -9.070  4.00  0.00           O  
ATOM    782  C4'  DG A  25     -14.147 -32.564 -10.690  3.00  0.00           C  
ATOM    783  O4'  DG A  25     -12.901 -31.995 -10.250  1.00  0.00           O  
ATOM    784  C3'  DG A  25     -14.372 -33.933  -9.940  2.00  0.00           C  
ATOM    785  O3'  DG A  25     -13.856 -34.978 -10.760  9.00  0.00           O  
ATOM    786  C2'  DG A  25     -13.590 -33.668  -8.640  9.00  0.00           C  
ATOM    787  C1'  DG A  25     -12.387 -32.931  -9.240  8.00  0.00           C  
ATOM    788  N1   DG A  25      -7.499 -31.841  -8.020  0.00  0.00           N  
ATOM    789  C2   DG A  25      -8.051 -32.168  -9.220  7.00  0.00           C  
ATOM    790  N2   DG A  25      -7.304 -32.159 -10.280  0.00  0.00           N  
ATOM    791  N3   DG A  25      -9.343 -32.476  -9.400  4.00  0.00           N  
ATOM    792  C4   DG A  25     -10.059 -32.280  -8.330  2.00  0.00           C  
ATOM    793  C5   DG A  25      -9.678 -31.837  -7.100  1.00  0.00           C  
ATOM    794  C6   DG A  25      -8.244 -31.637  -6.870  1.00  0.00           C  
ATOM    795  O6   DG A  25      -7.626 -31.265  -5.860  0.00  0.00           O  
ATOM    796  N7   DG A  25     -10.823 -31.630  -6.280  3.00  0.00           N  
ATOM    797  C8   DG A  25     -11.787 -31.945  -6.990  8.00  0.00           C  
ATOM    798  N9   DG A  25     -11.457 -32.381  -8.250  8.00  0.00           N  
ATOM    799  OP1  DG A  25     -17.775 -30.442  -9.770  3.00  0.00           O  
ATOM    800  OP2  DG A  25     -16.785 -29.906  -7.410  0.00  0.00           O1-
ATOM    801  H1   DG A  25      -6.543 -31.526  -7.930  2.00  0.00           H  
ATOM    802  H8   DG A  25     -12.762 -31.905  -6.520  9.00  0.00           H  
ATOM    803  H1'  DG A  25     -11.812 -33.741  -9.830  3.00  0.00           H  
ATOM    804  H2'  DG A  25     -14.080 -33.067  -7.900  4.00  0.00           H  
ATOM    805  H21  DG A  25      -6.320 -31.979 -10.150  3.00  0.00           H  
ATOM    806  H3'  DG A  25     -15.426 -34.105  -9.690  6.00  0.00           H  
ATOM    807  H22  DG A  25      -7.671 -32.522 -11.150  1.00  0.00           H  
ATOM    808  H4'  DG A  25     -14.036 -32.719 -11.810  7.00  0.00           H  
ATOM    809  H5'  DG A  25     -15.345 -30.660 -11.010  7.00  0.00           H  
ATOM    810 H2''  DG A  25     -13.228 -34.489  -8.090  5.00  0.00           H  
ATOM    811 H5''  DG A  25     -16.248 -32.161 -10.810  1.00  0.00           H  
ATOM    812  P    DG A  26     -14.316 -36.491 -10.440  5.00  0.00           P  
ATOM    813  C5'  DG A  26     -13.683 -37.223 -12.870  5.00  0.00           C  
ATOM    814  O5'  DG A  26     -13.451 -37.275 -11.480  7.00  0.00           O  
ATOM    815  C4'  DG A  26     -12.402 -37.759 -13.560  4.00  0.00           C  
ATOM    816  O4'  DG A  26     -11.312 -37.001 -13.200  9.00  0.00           O  
ATOM    817  C3'  DG A  26     -12.146 -39.238 -13.300  2.00  0.00           C  
ATOM    818  O3'  DG A  26     -11.686 -39.958 -14.430  2.00  0.00           O  
ATOM    819  C2'  DG A  26     -11.165 -39.083 -12.170  3.00  0.00           C  
ATOM    820  C1'  DG A  26     -10.346 -37.973 -12.860  4.00  0.00           C  
ATOM    821  N1   DG A  26      -9.004 -35.873  -8.360  2.00  0.00           N  
ATOM    822  C2   DG A  26     -10.190 -36.305  -8.810  2.00  0.00           C  
ATOM    823  N2   DG A  26     -11.267 -36.102  -8.050  0.00  0.00           N  
ATOM    824  N3   DG A  26     -10.400 -36.925  -9.940  0.00  0.00           N  
ATOM    825  C4   DG A  26      -9.316 -36.941 -10.770  4.00  0.00           C  
ATOM    826  C5   DG A  26      -8.124 -36.352 -10.480  5.00  0.00           C  
ATOM    827  C6   DG A  26      -7.913 -35.862  -9.150  7.00  0.00           C  
ATOM    828  O6   DG A  26      -6.964 -35.234  -8.650  4.00  0.00           O  
ATOM    829  N7   DG A  26      -7.269 -36.384 -11.580  0.00  0.00           N  
ATOM    830  C8   DG A  26      -8.003 -36.990 -12.490  6.00  0.00           C  
ATOM    831  N9   DG A  26      -9.253 -37.422 -12.050  8.00  0.00           N  
ATOM    832  OP1  DG A  26     -15.708 -36.651 -10.810  3.00  0.00           O  
ATOM    833  OP2  DG A  26     -13.839 -36.818  -9.070  7.00  0.00           O1-
ATOM    834  H1   DG A  26      -8.949 -35.504  -7.400  6.00  0.00           H  
ATOM    835  H8   DG A  26      -7.576 -37.167 -13.500  2.00  0.00           H  
ATOM    836  H1'  DG A  26      -9.891 -38.301 -13.750  1.00  0.00           H  
ATOM    837  H2'  DG A  26     -11.672 -38.843 -11.300  1.00  0.00           H  
ATOM    838  H21  DG A  26     -11.175 -35.514  -7.150  1.00  0.00           H  
ATOM    839  H3'  DG A  26     -13.076 -39.752 -12.960  7.00  0.00           H  
ATOM    840  H22  DG A  26     -12.200 -36.368  -8.400  9.00  0.00           H  
ATOM    841  H4'  DG A  26     -12.599 -37.769 -14.670  3.00  0.00           H  
ATOM    842  H5'  DG A  26     -13.870 -36.205 -13.170  5.00  0.00           H  
ATOM    843 H2''  DG A  26     -10.644 -39.895 -11.770  4.00  0.00           H  
ATOM    844 H5''  DG A  26     -14.618 -37.721 -13.220  4.00  0.00           H  
ATOM    845  P    DG A  27     -11.581 -41.539 -14.430  0.00  0.00           P  
ATOM    846  C5'  DG A  27      -9.067 -41.313 -14.010  1.00  0.00           C  
ATOM    847  O5'  DG A  27     -10.306 -41.781 -13.570  9.00  0.00           O  
ATOM    848  C4'  DG A  27      -7.864 -41.484 -13.140  0.00  0.00           C  
ATOM    849  O4'  DG A  27      -7.673 -40.529 -12.110  2.00  0.00           O  
ATOM    850  C3'  DG A  27      -7.670 -42.905 -12.620  1.00  0.00           C  
ATOM    851  O3'  DG A  27      -6.511 -43.569 -13.270  6.00  0.00           O  
ATOM    852  C2'  DG A  27      -7.489 -42.661 -11.100  5.00  0.00           C  
ATOM    853  C1'  DG A  27      -7.160 -41.152 -10.940  1.00  0.00           C  
ATOM    854  N1   DG A  27      -6.028 -37.854  -7.340  8.00  0.00           N  
ATOM    855  C2   DG A  27      -5.347 -38.266  -8.400  1.00  0.00           C  
ATOM    856  N2   DG A  27      -4.127 -37.796  -8.550  6.00  0.00           N  
ATOM    857  N3   DG A  27      -5.810 -39.104  -9.350  2.00  0.00           N  
ATOM    858  C4   DG A  27      -7.077 -39.497  -9.130  9.00  0.00           C  
ATOM    859  C5   DG A  27      -7.891 -39.157  -8.010  2.00  0.00           C  
ATOM    860  C6   DG A  27      -7.345 -38.309  -7.070  4.00  0.00           C  
ATOM    861  O6   DG A  27      -7.965 -37.916  -6.070  5.00  0.00           O  
ATOM    862  N7   DG A  27      -9.133 -39.753  -8.090  4.00  0.00           N  
ATOM    863  C8   DG A  27      -9.000 -40.610  -9.050  8.00  0.00           C  
ATOM    864  N9   DG A  27      -7.723 -40.511  -9.750  5.00  0.00           N  
ATOM    865  OP1  DG A  27     -11.258 -41.981 -15.800  3.00  0.00           O  
ATOM    866  OP2  DG A  27     -12.788 -42.146 -13.760  5.00  0.00           O1-
ATOM    867  H1   DG A  27      -5.620 -37.186  -6.700  6.00  0.00           H  
ATOM    868  H8   DG A  27      -9.747 -41.297  -9.380  9.00  0.00           H  
ATOM    869  H1'  DG A  27      -6.094 -41.092 -10.890  0.00  0.00           H  
ATOM    870  H2'  DG A  27      -8.427 -42.805 -10.540  6.00  0.00           H  
ATOM    871  H21  DG A  27      -3.728 -37.174  -7.880  4.00  0.00           H  
ATOM    872  H3'  DG A  27      -8.550 -43.517 -12.780  3.00  0.00           H  
ATOM    873  H22  DG A  27      -3.606 -38.074  -9.440  4.00  0.00           H  
ATOM    874  H4'  DG A  27      -7.067 -41.293 -13.770  8.00  0.00           H  
ATOM    875  H5'  DG A  27      -9.132 -40.313 -14.480  9.00  0.00           H  
ATOM    876 H2''  DG A  27      -6.667 -43.275 -10.710  5.00  0.00           H  
ATOM    877 H5''  DG A  27      -8.818 -41.985 -14.810  4.00  0.00           H  
ATOM    878  P    DT A  28      -6.180 -45.147 -13.110  5.00  0.00           P  
ATOM    879  C5'  DT A  28      -4.704 -46.449 -11.380  1.00  0.00           C  
ATOM    880  O5'  DT A  28      -5.269 -45.216 -11.810  9.00  0.00           O  
ATOM    881  C4'  DT A  28      -3.889 -46.418 -10.120  6.00  0.00           C  
ATOM    882  O4'  DT A  28      -2.923 -45.354 -10.190  2.00  0.00           O  
ATOM    883  C3'  DT A  28      -4.725 -46.156  -8.850  2.00  0.00           C  
ATOM    884  O3'  DT A  28      -4.302 -46.891  -7.700  9.00  0.00           O  
ATOM    885  C2'  DT A  28      -4.541 -44.686  -8.620  5.00  0.00           C  
ATOM    886  C1'  DT A  28      -3.230 -44.293  -9.270  4.00  0.00           C  
ATOM    887  N1   DT A  28      -3.147 -42.924  -9.880  3.00  0.00           N  
ATOM    888  C2   DT A  28      -2.718 -41.953  -9.000  9.00  0.00           C  
ATOM    889  O2   DT A  28      -2.240 -42.143  -7.890  9.00  0.00           O  
ATOM    890  N3   DT A  28      -2.759 -40.610  -9.480  4.00  0.00           N  
ATOM    891  C4   DT A  28      -3.096 -40.248 -10.790  4.00  0.00           C  
ATOM    892  O4   DT A  28      -3.123 -39.064 -11.070  5.00  0.00           O  
ATOM    893  C5   DT A  28      -3.436 -41.381 -11.660  5.00  0.00           C  
ATOM    894  C6   DT A  28      -3.433 -42.639 -11.200  7.00  0.00           C  
ATOM    895  C7   DT A  28      -3.786 -41.125 -13.100  1.00  0.00           C  
ATOM    896  OP1  DT A  28      -5.387 -45.552 -14.270  4.00  0.00           O  
ATOM    897  OP2  DT A  28      -7.539 -45.769 -12.850  3.00  0.00           O1-
ATOM    898  H3   DT A  28      -2.314 -39.817  -9.020  0.00  0.00           H  
ATOM    899  H6   DT A  28      -3.614 -43.443 -11.950  7.00  0.00           H  
ATOM    900  H1'  DT A  28      -2.413 -44.341  -8.460  9.00  0.00           H  
ATOM    901  H2'  DT A  28      -5.448 -44.143  -9.000  4.00  0.00           H  
ATOM    902  H3'  DT A  28      -5.762 -46.299  -9.130  4.00  0.00           H  
ATOM    903  H4'  DT A  28      -3.418 -47.438 -10.050  6.00  0.00           H  
ATOM    904  H5'  DT A  28      -4.077 -46.886 -12.180  3.00  0.00           H  
ATOM    905  H71  DT A  28      -4.613 -40.346 -13.090  8.00  0.00           H  
ATOM    906  H72  DT A  28      -2.925 -40.808 -13.650  3.00  0.00           H  
ATOM    907  H73  DT A  28      -4.306 -41.992 -13.460  6.00  0.00           H  
ATOM    908 H2''  DT A  28      -4.562 -44.355  -7.560  0.00  0.00           H  
ATOM    909 H5''  DT A  28      -5.493 -47.199 -11.250  4.00  0.00           H  
ATOM    910  P    DT A  29      -4.790 -48.322  -7.420  0.00  0.00           P  
ATOM    911  C5'  DT A  29      -7.081 -49.054  -6.540  8.00  0.00           C  
ATOM    912  O5'  DT A  29      -6.278 -48.031  -7.040  1.00  0.00           O  
ATOM    913  C4'  DT A  29      -8.218 -48.455  -5.740  2.00  0.00           C  
ATOM    914  O4'  DT A  29      -7.680 -47.763  -4.600  3.00  0.00           O  
ATOM    915  C3'  DT A  29      -9.150 -47.466  -6.490  4.00  0.00           C  
ATOM    916  O3'  DT A  29     -10.466 -47.662  -6.120  6.00  0.00           O  
ATOM    917  C2'  DT A  29      -8.511 -46.146  -6.050  8.00  0.00           C  
ATOM    918  C1'  DT A  29      -8.274 -46.498  -4.560  0.00  0.00           C  
ATOM    919  N1   DT A  29      -7.411 -45.493  -3.890  8.00  0.00           N  
ATOM    920  C2   DT A  29      -8.070 -44.736  -2.860  3.00  0.00           C  
ATOM    921  O2   DT A  29      -9.194 -44.935  -2.410  4.00  0.00           O  
ATOM    922  N3   DT A  29      -7.373 -43.632  -2.430  3.00  0.00           N  
ATOM    923  C4   DT A  29      -6.124 -43.258  -2.770  5.00  0.00           C  
ATOM    924  O4   DT A  29      -5.623 -42.307  -2.170  4.00  0.00           O  
ATOM    925  C5   DT A  29      -5.495 -44.046  -3.840  2.00  0.00           C  
ATOM    926  C6   DT A  29      -6.137 -45.143  -4.340  4.00  0.00           C  
ATOM    927  C7   DT A  29      -4.034 -43.931  -4.210  2.00  0.00           C  
ATOM    928  OP1  DT A  29      -4.021 -48.820  -6.280  2.00  0.00           O  
ATOM    929  OP2  DT A  29      -4.761 -49.025  -8.770  5.00  0.00           O1-
ATOM    930  H3   DT A  29      -7.837 -43.014  -1.730  5.00  0.00           H  
ATOM    931  H6   DT A  29      -5.704 -45.905  -5.040  0.00  0.00           H  
ATOM    932  H1'  DT A  29      -9.267 -46.638  -4.070  5.00  0.00           H  
ATOM    933  H2'  DT A  29      -7.476 -45.983  -6.460  3.00  0.00           H  
ATOM    934  H3'  DT A  29      -9.056 -47.539  -7.530  8.00  0.00           H  
ATOM    935  H4'  DT A  29      -8.819 -49.291  -5.390  0.00  0.00           H  
ATOM    936  H5'  DT A  29      -6.464 -49.674  -5.850  2.00  0.00           H  
ATOM    937  H71  DT A  29      -3.602 -42.997  -3.880  9.00  0.00           H  
ATOM    938  H72  DT A  29      -3.514 -44.765  -3.610  6.00  0.00           H  
ATOM    939  H73  DT A  29      -3.908 -44.169  -5.280  2.00  0.00           H  
ATOM    940 H2''  DT A  29      -9.164 -45.316  -6.180  6.00  0.00           H  
ATOM    941 H5''  DT A  29      -7.492 -49.718  -7.310  9.00  0.00           H  
ATOM    942  P    DA A  30     -11.700 -46.864  -6.880  7.00  0.00           P  
ATOM    943  C5'  DA A  30     -12.169 -44.952  -5.150  4.00  0.00           C  
ATOM    944  O5'  DA A  30     -11.510 -45.340  -6.360  2.00  0.00           O  
ATOM    945  C4'  DA A  30     -11.891 -43.518  -4.780  1.00  0.00           C  
ATOM    946  O4'  DA A  30     -10.528 -43.153  -4.640  0.00  0.00           O  
ATOM    947  C3'  DA A  30     -12.427 -42.592  -5.940  6.00  0.00           C  
ATOM    948  O3'  DA A  30     -13.007 -41.405  -5.430  1.00  0.00           O  
ATOM    949  C2'  DA A  30     -11.167 -42.273  -6.780  7.00  0.00           C  
ATOM    950  C1'  DA A  30     -10.166 -42.176  -5.570  3.00  0.00           C  
ATOM    951  N1   DA A  30      -5.483 -40.262  -4.450  5.00  0.00           N  
ATOM    952  C2   DA A  30      -6.714 -40.106  -3.880  6.00  0.00           C  
ATOM    953  N3   DA A  30      -7.914 -40.566  -4.330  1.00  0.00           N  
ATOM    954  C4   DA A  30      -7.766 -41.432  -5.290  8.00  0.00           C  
ATOM    955  C5   DA A  30      -6.591 -41.729  -5.980  8.00  0.00           C  
ATOM    956  C6   DA A  30      -5.428 -41.072  -5.520  8.00  0.00           C  
ATOM    957  N6   DA A  30      -4.187 -41.224  -5.940  7.00  0.00           N  
ATOM    958  N7   DA A  30      -6.750 -42.655  -6.990  4.00  0.00           N  
ATOM    959  C8   DA A  30      -8.036 -42.993  -6.800  7.00  0.00           C  
ATOM    960  N9   DA A  30      -8.730 -42.208  -5.850  0.00  0.00           N  
ATOM    961  OP1  DA A  30     -13.010 -47.288  -6.410  6.00  0.00           O  
ATOM    962  OP2  DA A  30     -11.459 -46.844  -8.360  8.00  0.00           O1-
ATOM    963  H2   DA A  30      -6.707 -39.498  -2.980  8.00  0.00           H  
ATOM    964  H8   DA A  30      -8.529 -43.618  -7.490  7.00  0.00           H  
ATOM    965  H1'  DA A  30     -10.408 -41.174  -5.180  5.00  0.00           H  
ATOM    966  H2'  DA A  30     -10.938 -43.132  -7.380  3.00  0.00           H  
ATOM    967  H3'  DA A  30     -13.239 -43.166  -6.390  5.00  0.00           H  
ATOM    968  H4'  DA A  30     -12.337 -43.363  -3.850  3.00  0.00           H  
ATOM    969  H5'  DA A  30     -11.561 -45.515  -4.370  7.00  0.00           H  
ATOM    970  H61  DA A  30      -3.515 -40.569  -5.540  7.00  0.00           H  
ATOM    971  H62  DA A  30      -3.909 -41.813  -6.730  0.00  0.00           H  
ATOM    972 H2''  DA A  30     -11.314 -41.434  -7.450  7.00  0.00           H  
ATOM    973 H5''  DA A  30     -13.275 -45.261  -5.070  1.00  0.00           H  
ATOM    974  P    DG A  31     -14.545 -41.201  -5.530  1.00  0.00           P  
ATOM    975  C5'  DG A  31     -15.671 -40.629  -3.170  1.00  0.00           C  
ATOM    976  O5'  DG A  31     -14.949 -40.208  -4.340  7.00  0.00           O  
ATOM    977  C4'  DG A  31     -15.715 -39.682  -1.950  8.00  0.00           C  
ATOM    978  O4'  DG A  31     -14.360 -39.516  -1.460  7.00  0.00           O  
ATOM    979  C3'  DG A  31     -16.276 -38.237  -2.130  9.00  0.00           C  
ATOM    980  O3'  DG A  31     -17.017 -37.830  -0.960  4.00  0.00           O  
ATOM    981  C2'  DG A  31     -14.959 -37.439  -2.230  5.00  0.00           C  
ATOM    982  C1'  DG A  31     -14.140 -38.183  -1.200  1.00  0.00           C  
ATOM    983  N1   DG A  31      -9.853 -37.598  -3.850  6.00  0.00           N  
ATOM    984  C2   DG A  31     -10.907 -38.369  -4.230  3.00  0.00           C  
ATOM    985  N2   DG A  31     -10.813 -38.899  -5.420  5.00  0.00           N  
ATOM    986  N3   DG A  31     -11.928 -38.586  -3.420  5.00  0.00           N  
ATOM    987  C4   DG A  31     -11.775 -37.984  -2.180  4.00  0.00           C  
ATOM    988  C5   DG A  31     -10.596 -37.413  -1.670  5.00  0.00           C  
ATOM    989  C6   DG A  31      -9.507 -37.194  -2.570  8.00  0.00           C  
ATOM    990  O6   DG A  31      -8.391 -36.699  -2.270  2.00  0.00           O  
ATOM    991  N7   DG A  31     -10.700 -37.082  -0.320  7.00  0.00           N  
ATOM    992  C8   DG A  31     -11.991 -37.370  -0.080  0.00  0.00           C  
ATOM    993  N9   DG A  31     -12.695 -37.954  -1.160  8.00  0.00           N  
ATOM    994  OP1  DG A  31     -15.242 -42.496  -5.340  0.00  0.00           O  
ATOM    995  OP2  DG A  31     -14.798 -40.472  -6.780  5.00  0.00           O1-
ATOM    996  H1   DG A  31      -9.178 -37.462  -4.610  4.00  0.00           H  
ATOM    997  H8   DG A  31     -12.535 -37.259   0.820  9.00  0.00           H  
ATOM    998  H1'  DG A  31     -14.604 -37.917  -0.230  3.00  0.00           H  
ATOM    999  H2'  DG A  31     -14.434 -37.548  -3.230  1.00  0.00           H  
ATOM   1000  H21  DG A  31     -10.149 -38.647  -6.140  2.00  0.00           H  
ATOM   1001  H3'  DG A  31     -16.977 -38.052  -2.940  0.00  0.00           H  
ATOM   1002  H22  DG A  31     -11.542 -39.462  -5.580  9.00  0.00           H  
ATOM   1003  H4'  DG A  31     -16.232 -40.031  -1.100  7.00  0.00           H  
ATOM   1004  H5'  DG A  31     -15.260 -41.582  -2.800  9.00  0.00           H  
ATOM   1005 H2''  DG A  31     -15.111 -36.450  -1.920  8.00  0.00           H  
ATOM   1006 H5''  DG A  31     -16.680 -40.879  -3.630  2.00  0.00           H  
ATOM   1007  P    DG A  32     -17.994 -36.526  -0.900  7.00  0.00           P  
ATOM   1008  C5'  DG A  32     -16.347 -34.867   0.340  3.00  0.00           C  
ATOM   1009  O5'  DG A  32     -16.904 -35.342  -0.880  9.00  0.00           O  
ATOM   1010  C4'  DG A  32     -15.332 -33.703   0.090  6.00  0.00           C  
ATOM   1011  O4'  DG A  32     -14.369 -34.081  -0.800  0.00  0.00           O  
ATOM   1012  C3'  DG A  32     -16.143 -32.601  -0.690  2.00  0.00           C  
ATOM   1013  O3'  DG A  32     -15.616 -31.340  -0.280  4.00  0.00           O  
ATOM   1014  C2'  DG A  32     -15.802 -32.947  -2.150  6.00  0.00           C  
ATOM   1015  C1'  DG A  32     -14.336 -33.213  -1.860  8.00  0.00           C  
ATOM   1016  N1   DG A  32      -9.737 -34.201  -3.670  5.00  0.00           N  
ATOM   1017  C2   DG A  32     -10.132 -33.618  -2.510  6.00  0.00           C  
ATOM   1018  N2   DG A  32      -9.249 -33.319  -1.610  8.00  0.00           N  
ATOM   1019  N3   DG A  32     -11.385 -33.552  -2.150  4.00  0.00           N  
ATOM   1020  C4   DG A  32     -12.259 -33.961  -3.110  2.00  0.00           C  
ATOM   1021  C5   DG A  32     -11.950 -34.501  -4.300  5.00  0.00           C  
ATOM   1022  C6   DG A  32     -10.575 -34.678  -4.650  5.00  0.00           C  
ATOM   1023  O6   DG A  32     -10.066 -35.152  -5.680  1.00  0.00           O  
ATOM   1024  N7   DG A  32     -13.179 -34.970  -4.880  7.00  0.00           N  
ATOM   1025  C8   DG A  32     -14.083 -34.493  -4.110  5.00  0.00           C  
ATOM   1026  N9   DG A  32     -13.632 -33.935  -2.960  4.00  0.00           N  
ATOM   1027  OP1  DG A  32     -18.756 -36.458   0.360  2.00  0.00           O  
ATOM   1028  OP2  DG A  32     -18.703 -36.532  -2.180  7.00  0.00           O1-
ATOM   1029  H1   DG A  32      -8.728 -34.340  -3.660  6.00  0.00           H  
ATOM   1030  H8   DG A  32     -15.157 -34.696  -4.290  5.00  0.00           H  
ATOM   1031  H1'  DG A  32     -13.910 -32.252  -1.590  7.00  0.00           H  
ATOM   1032  H2'  DG A  32     -16.242 -33.857  -2.510  4.00  0.00           H  
ATOM   1033  H21  DG A  32      -8.265 -33.396  -1.860  3.00  0.00           H  
ATOM   1034  H3'  DG A  32     -17.211 -32.614  -0.430  8.00  0.00           H  
ATOM   1035  H22  DG A  32      -9.521 -32.736  -0.900  4.00  0.00           H  
ATOM   1036  H4'  DG A  32     -14.914 -33.315   1.040  2.00  0.00           H  
ATOM   1037  H5'  DG A  32     -15.907 -35.679   0.840  7.00  0.00           H  
ATOM   1038 H2''  DG A  32     -15.892 -32.094  -2.750  4.00  0.00           H  
ATOM   1039 H5''  DG A  32     -17.127 -34.500   0.930  5.00  0.00           H  
ATOM   1040  P    DG A  33     -16.462 -29.944  -0.440  6.00  0.00           P  
ATOM   1041  C5'  DG A  33     -14.556 -28.486   0.870  3.00  0.00           C  
ATOM   1042  O5'  DG A  33     -15.255 -28.821  -0.330  0.00  0.00           O  
ATOM   1043  C4'  DG A  33     -13.748 -29.640   1.390  2.00  0.00           C  
ATOM   1044  O4'  DG A  33     -12.684 -29.979   0.450  9.00  0.00           O  
ATOM   1045  C3'  DG A  33     -13.027 -29.381   2.720  8.00  0.00           C  
ATOM   1046  O3'  DG A  33     -12.351 -28.170   2.850  4.00  0.00           O  
ATOM   1047  C2'  DG A  33     -12.027 -30.504   2.610  4.00  0.00           C  
ATOM   1048  C1'  DG A  33     -11.591 -30.507   1.090  5.00  0.00           C  
ATOM   1049  N1   DG A  33      -8.083 -29.477  -2.420  1.00  0.00           N  
ATOM   1050  C2   DG A  33      -9.256 -30.127  -2.540  8.00  0.00           C  
ATOM   1051  N2   DG A  33      -9.471 -30.643  -3.730  0.00  0.00           N  
ATOM   1052  N3   DG A  33     -10.212 -30.237  -1.580  2.00  0.00           N  
ATOM   1053  C4   DG A  33      -9.827 -29.620  -0.430  4.00  0.00           C  
ATOM   1054  C5   DG A  33      -8.737 -28.838  -0.290  7.00  0.00           C  
ATOM   1055  C6   DG A  33      -7.778 -28.657  -1.370  7.00  0.00           C  
ATOM   1056  O6   DG A  33      -6.756 -27.950  -1.510  4.00  0.00           O  
ATOM   1057  N7   DG A  33      -8.642 -28.389   1.000  8.00  0.00           N  
ATOM   1058  C8   DG A  33      -9.701 -28.802   1.590  0.00  0.00           C  
ATOM   1059  N9   DG A  33     -10.431 -29.636   0.790  5.00  0.00           N  
ATOM   1060  OP1  DG A  33     -17.293 -29.866   0.760  7.00  0.00           O  
ATOM   1061  OP2  DG A  33     -17.113 -29.930  -1.790  3.00  0.00           O1-
ATOM   1062  H1   DG A  33      -7.493 -29.438  -3.260  3.00  0.00           H  
ATOM   1063  H8   DG A  33     -10.032 -28.626   2.610  4.00  0.00           H  
ATOM   1064  H1'  DG A  33     -11.520 -31.553   0.720  7.00  0.00           H  
ATOM   1065  H2'  DG A  33     -11.157 -30.362   3.170  8.00  0.00           H  
ATOM   1066  H21  DG A  33      -8.735 -30.744  -4.390  7.00  0.00           H  
ATOM   1067  H3'  DG A  33     -13.674 -29.502   3.540  2.00  0.00           H  
ATOM   1068  H22  DG A  33     -10.362 -31.187  -3.840  1.00  0.00           H  
ATOM   1069  H4'  DG A  33     -14.430 -30.451   1.440  6.00  0.00           H  
ATOM   1070  H5'  DG A  33     -15.226 -28.184   1.730  4.00  0.00           H  
ATOM   1071 H2''  DG A  33     -12.491 -31.485   2.860  8.00  0.00           H  
ATOM   1072 H5''  DG A  33     -13.895 -27.778   0.490  8.00  0.00           H  
ATOM   1073  P    DT A  34     -12.575 -27.145   4.010  7.00  0.00           P  
ATOM   1074  C5'  DT A  34     -10.796 -25.673   2.720  1.00  0.00           C  
ATOM   1075  O5'  DT A  34     -12.036 -25.749   3.350  6.00  0.00           O  
ATOM   1076  C4'  DT A  34     -10.369 -24.233   2.530  1.00  0.00           C  
ATOM   1077  O4'  DT A  34     -10.905 -23.617   1.360  1.00  0.00           O  
ATOM   1078  C3'  DT A  34     -10.770 -23.258   3.660  3.00  0.00           C  
ATOM   1079  O3'  DT A  34      -9.714 -22.274   3.780  5.00  0.00           O  
ATOM   1080  C2'  DT A  34     -12.093 -22.601   3.160  4.00  0.00           C  
ATOM   1081  C1'  DT A  34     -11.899 -22.641   1.720  7.00  0.00           C  
ATOM   1082  N1   DT A  34     -13.101 -22.836   0.830  3.00  0.00           N  
ATOM   1083  C2   DT A  34     -13.627 -21.697   0.230  7.00  0.00           C  
ATOM   1084  O2   DT A  34     -13.056 -20.617   0.270  2.00  0.00           O  
ATOM   1085  N3   DT A  34     -14.840 -21.790  -0.430  0.00  0.00           N  
ATOM   1086  C4   DT A  34     -15.552 -22.914  -0.640  7.00  0.00           C  
ATOM   1087  O4   DT A  34     -16.598 -22.889  -1.270  8.00  0.00           O  
ATOM   1088  C5   DT A  34     -15.029 -24.052   0.100  0.00  0.00           C  
ATOM   1089  C6   DT A  34     -13.809 -24.010   0.790  7.00  0.00           C  
ATOM   1090  C7   DT A  34     -15.880 -25.328   0.030  9.00  0.00           C  
ATOM   1091  OP1  DT A  34     -11.555 -27.522   4.990  1.00  0.00           O  
ATOM   1092  OP2  DT A  34     -13.981 -27.038   4.430  7.00  0.00           O1-
ATOM   1093  H3   DT A  34     -15.063 -21.014  -1.050  9.00  0.00           H  
ATOM   1094  H6   DT A  34     -13.499 -24.807   1.460  8.00  0.00           H  
ATOM   1095  H1'  DT A  34     -11.458 -21.609   1.500  9.00  0.00           H  
ATOM   1096  H2'  DT A  34     -12.859 -23.273   3.400  2.00  0.00           H  
ATOM   1097  H3'  DT A  34     -10.871 -23.792   4.620  6.00  0.00           H  
ATOM   1098  H4'  DT A  34      -9.257 -24.301   2.450  8.00  0.00           H  
ATOM   1099  H5'  DT A  34     -10.915 -26.117   1.760  7.00  0.00           H  
ATOM   1100  H71  DT A  34     -15.654 -26.031   0.820  2.00  0.00           H  
ATOM   1101  H72  DT A  34     -16.958 -24.978   0.110  0.00  0.00           H  
ATOM   1102  H73  DT A  34     -15.720 -25.816  -0.930  5.00  0.00           H  
ATOM   1103 H2''  DT A  34     -12.324 -21.695   3.650  8.00  0.00           H  
ATOM   1104 H5''  DT A  34      -9.977 -26.204   3.290  6.00  0.00           H  
ATOM   1105  P    DT A  35      -9.452 -21.412   5.130  7.00  0.00           P  
ATOM   1106  C5'  DT A  35     -10.863 -19.343   4.370  8.00  0.00           C  
ATOM   1107  O5'  DT A  35     -10.655 -20.464   5.240  9.00  0.00           O  
ATOM   1108  C4'  DT A  35     -11.996 -18.377   4.870  9.00  0.00           C  
ATOM   1109  O4'  DT A  35     -13.214 -19.069   4.940  9.00  0.00           O  
ATOM   1110  C3'  DT A  35     -11.697 -17.789   6.230  2.00  0.00           C  
ATOM   1111  O3'  DT A  35     -12.263 -16.477   6.430  7.00  0.00           O  
ATOM   1112  C2'  DT A  35     -12.429 -18.799   7.070  7.00  0.00           C  
ATOM   1113  C1'  DT A  35     -13.649 -19.119   6.230  9.00  0.00           C  
ATOM   1114  N1   DT A  35     -14.347 -20.461   6.410  7.00  0.00           N  
ATOM   1115  C2   DT A  35     -15.726 -20.396   6.790  6.00  0.00           C  
ATOM   1116  O2   DT A  35     -16.508 -19.425   6.720  7.00  0.00           O  
ATOM   1117  N3   DT A  35     -16.295 -21.622   7.080  2.00  0.00           N  
ATOM   1118  C4   DT A  35     -15.610 -22.856   7.040  6.00  0.00           C  
ATOM   1119  O4   DT A  35     -16.132 -23.882   7.490  5.00  0.00           O  
ATOM   1120  C5   DT A  35     -14.221 -22.864   6.620  0.00  0.00           C  
ATOM   1121  C6   DT A  35     -13.624 -21.651   6.330  3.00  0.00           C  
ATOM   1122  C7   DT A  35     -13.441 -24.173   6.630  2.00  0.00           C  
ATOM   1123  OP1  DT A  35      -8.246 -20.521   5.010  7.00  0.00           O  
ATOM   1124  OP2  DT A  35      -9.604 -22.440   6.180  3.00  0.00           O1-
ATOM   1125  H3   DT A  35     -17.335 -21.578   7.190  7.00  0.00           H  
ATOM   1126  H6   DT A  35     -12.618 -21.635   5.930  0.00  0.00           H  
ATOM   1127  H1'  DT A  35     -14.343 -18.264   6.410  7.00  0.00           H  
ATOM   1128  H2'  DT A  35     -11.870 -19.726   7.280  0.00  0.00           H  
ATOM   1129  H3'  DT A  35     -10.593 -17.820   6.310  8.00  0.00           H  
ATOM   1130  H4'  DT A  35     -12.175 -17.680   4.110  7.00  0.00           H  
ATOM   1131  H5'  DT A  35     -11.283 -19.748   3.500  4.00  0.00           H  
ATOM   1132  H71  DT A  35     -13.689 -24.929   5.930  4.00  0.00           H  
ATOM   1133  H72  DT A  35     -12.390 -23.818   6.660  0.00  0.00           H  
ATOM   1134  H73  DT A  35     -13.511 -24.689   7.570  5.00  0.00           H  
ATOM   1135 H2''  DT A  35     -12.721 -18.285   7.980  6.00  0.00           H  
ATOM   1136 H5''  DT A  35      -9.977 -18.780   4.240  8.00  0.00           H  
ATOM   1137  P    DA A  36     -12.070 -15.468   7.720  6.00  0.00           P  
ATOM   1138  C5'  DA A  36     -14.656 -15.418   8.230  3.00  0.00           C  
ATOM   1139  O5'  DA A  36     -13.300 -15.638   8.690  6.00  0.00           O  
ATOM   1140  C4'  DA A  36     -15.651 -15.917   9.300  4.00  0.00           C  
ATOM   1141  O4'  DA A  36     -16.094 -17.243   9.100  5.00  0.00           O  
ATOM   1142  C3'  DA A  36     -15.211 -15.709  10.780  9.00  0.00           C  
ATOM   1143  O3'  DA A  36     -16.208 -14.982  11.440  1.00  0.00           O  
ATOM   1144  C2'  DA A  36     -15.240 -17.153  11.250  7.00  0.00           C  
ATOM   1145  C1'  DA A  36     -16.286 -17.828  10.400  6.00  0.00           C  
ATOM   1146  N1   DA A  36     -19.233 -22.034  10.940  4.00  0.00           N  
ATOM   1147  C2   DA A  36     -19.553 -20.721  10.880  0.00  0.00           C  
ATOM   1148  N3   DA A  36     -18.710 -19.704  10.700  7.00  0.00           N  
ATOM   1149  C4   DA A  36     -17.406 -20.083  10.490  4.00  0.00           C  
ATOM   1150  C5   DA A  36     -16.974 -21.399  10.550  2.00  0.00           C  
ATOM   1151  C6   DA A  36     -17.909 -22.384  10.850  3.00  0.00           C  
ATOM   1152  N6   DA A  36     -17.680 -23.691  10.840  2.00  0.00           N  
ATOM   1153  N7   DA A  36     -15.557 -21.439  10.430  8.00  0.00           N  
ATOM   1154  C8   DA A  36     -15.220 -20.212  10.430  3.00  0.00           C  
ATOM   1155  N9   DA A  36     -16.278 -19.326  10.390  3.00  0.00           N  
ATOM   1156  OP1  DA A  36     -12.131 -14.099   7.200  8.00  0.00           O  
ATOM   1157  OP2  DA A  36     -10.835 -15.914   8.440  2.00  0.00           O1-
ATOM   1158  H2   DA A  36     -20.568 -20.449  11.050  8.00  0.00           H  
ATOM   1159  H8   DA A  36     -14.235 -19.879  10.430  7.00  0.00           H  
ATOM   1160  H1'  DA A  36     -17.221 -17.540  10.710  6.00  0.00           H  
ATOM   1161  H2'  DA A  36     -14.251 -17.646  10.980  2.00  0.00           H  
ATOM   1162  H3'  DA A  36     -14.225 -15.274  10.840  5.00  0.00           H  
ATOM   1163  H4'  DA A  36     -16.453 -15.245   9.170  3.00  0.00           H  
ATOM   1164  H5'  DA A  36     -14.822 -15.930   7.290  7.00  0.00           H  
ATOM   1165  H61  DA A  36     -18.404 -24.395  11.000  0.00  0.00           H  
ATOM   1166  H62  DA A  36     -16.741 -23.926  10.700  0.00  0.00           H  
ATOM   1167 H2''  DA A  36     -15.292 -17.425  12.290  8.00  0.00           H  
ATOM   1168 H5''  DA A  36     -14.892 -14.314   8.080  8.00  0.00           H  
ATOM   1169  P    DG A  37     -15.903 -14.225  12.810  1.00  0.00           P  
ATOM   1170  C5'  DG A  37     -16.718 -15.808  14.720  4.00  0.00           C  
ATOM   1171  O5'  DG A  37     -15.694 -15.389  13.860  3.00  0.00           O  
ATOM   1172  C4'  DG A  37     -17.960 -16.523  14.170  2.00  0.00           C  
ATOM   1173  O4'  DG A  37     -17.695 -17.695  13.380  6.00  0.00           O  
ATOM   1174  C3'  DG A  37     -18.794 -16.882  15.350  5.00  0.00           C  
ATOM   1175  O3'  DG A  37     -19.486 -15.797  16.040  6.00  0.00           O  
ATOM   1176  C2'  DG A  37     -19.756 -17.787  14.540  3.00  0.00           C  
ATOM   1177  C1'  DG A  37     -18.924 -18.466  13.490  1.00  0.00           C  
ATOM   1178  N1   DG A  37     -20.531 -23.346  14.110  8.00  0.00           N  
ATOM   1179  C2   DG A  37     -21.156 -22.269  13.610  5.00  0.00           C  
ATOM   1180  N2   DG A  37     -22.414 -22.466  13.410  2.00  0.00           N  
ATOM   1181  N3   DG A  37     -20.646 -21.039  13.500  9.00  0.00           N  
ATOM   1182  C4   DG A  37     -19.381 -20.972  13.980  0.00  0.00           C  
ATOM   1183  C5   DG A  37     -18.614 -21.991  14.510  4.00  0.00           C  
ATOM   1184  C6   DG A  37     -19.205 -23.346  14.580  1.00  0.00           C  
ATOM   1185  O6   DG A  37     -18.840 -24.424  15.090  9.00  0.00           O  
ATOM   1186  N7   DG A  37     -17.301 -21.614  14.760  9.00  0.00           N  
ATOM   1187  C8   DG A  37     -17.330 -20.303  14.350  6.00  0.00           C  
ATOM   1188  N9   DG A  37     -18.569 -19.825  14.000  7.00  0.00           N  
ATOM   1189  OP1  DG A  37     -17.171 -13.505  13.160  2.00  0.00           O  
ATOM   1190  OP2  DG A  37     -14.591 -13.549  12.870  6.00  0.00           O1-
ATOM   1191  H1   DG A  37     -21.074 -24.209  14.160  3.00  0.00           H  
ATOM   1192  H8   DG A  37     -16.381 -19.752  14.220  9.00  0.00           H  
ATOM   1193  H1'  DG A  37     -19.555 -18.396  12.630  2.00  0.00           H  
ATOM   1194  H2'  DG A  37     -20.294 -18.493  15.160  7.00  0.00           H  
ATOM   1195  H21  DG A  37     -22.820 -23.442  13.510  9.00  0.00           H  
ATOM   1196  H3'  DG A  37     -18.198 -17.472  16.050  4.00  0.00           H  
ATOM   1197  H22  DG A  37     -22.856 -21.642  13.100  5.00  0.00           H  
ATOM   1198  H4'  DG A  37     -18.517 -15.892  13.460  3.00  0.00           H  
ATOM   1199  H5'  DG A  37     -17.111 -14.991  15.280  0.00  0.00           H  
ATOM   1200 H2''  DG A  37     -20.528 -17.212  13.960  8.00  0.00           H  
ATOM   1201 H5''  DG A  37     -16.283 -16.426  15.530  8.00  0.00           H  
ATOM   1202  P    DG A  38     -19.699 -15.686  17.650  9.00  0.00           P  
ATOM   1203  C5'  DG A  38     -22.399 -15.915  17.440  3.00  0.00           C  
ATOM   1204  O5'  DG A  38     -21.126 -16.457  17.900  3.00  0.00           O  
ATOM   1205  C4'  DG A  38     -23.332 -17.115  17.130  0.00  0.00           C  
ATOM   1206  O4'  DG A  38     -22.681 -17.980  16.210  9.00  0.00           O  
ATOM   1207  C3'  DG A  38     -23.696 -17.950  18.290  3.00  0.00           C  
ATOM   1208  O3'  DG A  38     -24.837 -17.373  18.910  4.00  0.00           O  
ATOM   1209  C2'  DG A  38     -24.155 -19.185  17.480  0.00  0.00           C  
ATOM   1210  C1'  DG A  38     -22.953 -19.333  16.510  3.00  0.00           C  
ATOM   1211  N1   DG A  38     -21.904 -24.188  17.500  0.00  0.00           N  
ATOM   1212  C2   DG A  38     -23.002 -23.616  16.930  2.00  0.00           C  
ATOM   1213  N2   DG A  38     -24.057 -24.318  16.750  8.00  0.00           N  
ATOM   1214  N3   DG A  38     -23.217 -22.348  16.810  8.00  0.00           N  
ATOM   1215  C4   DG A  38     -22.087 -21.579  17.000  3.00  0.00           C  
ATOM   1216  C5   DG A  38     -20.877 -22.081  17.340  9.00  0.00           C  
ATOM   1217  C6   DG A  38     -20.770 -23.506  17.680  7.00  0.00           C  
ATOM   1218  O6   DG A  38     -19.814 -24.106  18.160  1.00  0.00           O  
ATOM   1219  N7   DG A  38     -19.918 -21.009  17.400  3.00  0.00           N  
ATOM   1220  C8   DG A  38     -20.513 -19.893  17.100  2.00  0.00           C  
ATOM   1221  N9   DG A  38     -21.883 -20.186  16.940  4.00  0.00           N  
ATOM   1222  OP1  DG A  38     -19.950 -14.335  18.120  9.00  0.00           O  
ATOM   1223  OP2  DG A  38     -18.637 -16.467  18.330  0.00  0.00           O1-
ATOM   1224  H1   DG A  38     -21.908 -25.242  17.740  7.00  0.00           H  
ATOM   1225  H8   DG A  38     -20.040 -18.908  17.140  9.00  0.00           H  
ATOM   1226  H1'  DG A  38     -23.288 -19.851  15.630  4.00  0.00           H  
ATOM   1227  H2'  DG A  38     -24.407 -20.065  18.070  7.00  0.00           H  
ATOM   1228  H21  DG A  38     -23.993 -25.284  16.830  2.00  0.00           H  
ATOM   1229  H3'  DG A  38     -22.867 -18.262  18.930  4.00  0.00           H  
ATOM   1230  H22  DG A  38     -24.872 -23.874  16.330  9.00  0.00           H  
ATOM   1231  H4'  DG A  38     -24.344 -16.737  16.750  8.00  0.00           H  
ATOM   1232  H5'  DG A  38     -22.334 -15.249  16.530  8.00  0.00           H  
ATOM   1233 H2''  DG A  38     -24.945 -18.976  16.880  9.00  0.00           H  
ATOM   1234 H5''  DG A  38     -22.964 -15.311  18.220  3.00  0.00           H  
ATOM   1235  P    DG A  39     -25.322 -17.853  20.410  5.00  0.00           P  
ATOM   1236  C5'  DG A  39     -27.218 -19.292  19.350  7.00  0.00           C  
ATOM   1237  O5'  DG A  39     -25.991 -19.230  20.100  5.00  0.00           O  
ATOM   1238  C4'  DG A  39     -27.558 -20.685  18.960  8.00  0.00           C  
ATOM   1239  O4'  DG A  39     -26.474 -21.416  18.350  1.00  0.00           O  
ATOM   1240  C3'  DG A  39     -28.048 -21.539  20.150  9.00  0.00           C  
ATOM   1241  O3'  DG A  39     -29.466 -21.343  20.280  8.00  0.00           O  
ATOM   1242  C2'  DG A  39     -27.715 -22.934  19.670  0.00  0.00           C  
ATOM   1243  C1'  DG A  39     -26.375 -22.768  18.890  7.00  0.00           C  
ATOM   1244  N1   DG A  39     -23.184 -26.097  21.250  5.00  0.00           N  
ATOM   1245  C2   DG A  39     -24.460 -26.301  20.730  0.00  0.00           C  
ATOM   1246  N2   DG A  39     -24.900 -27.531  20.880  6.00  0.00           N  
ATOM   1247  N3   DG A  39     -25.311 -25.364  20.390  3.00  0.00           N  
ATOM   1248  C4   DG A  39     -24.774 -24.088  20.400  0.00  0.00           C  
ATOM   1249  C5   DG A  39     -23.530 -23.757  20.930  1.00  0.00           C  
ATOM   1250  C6   DG A  39     -22.674 -24.849  21.380  2.00  0.00           C  
ATOM   1251  O6   DG A  39     -21.550 -24.813  21.820  9.00  0.00           O  
ATOM   1252  N7   DG A  39     -23.276 -22.343  20.770  0.00  0.00           N  
ATOM   1253  C8   DG A  39     -24.402 -21.919  20.220  3.00  0.00           C  
ATOM   1254  N9   DG A  39     -25.295 -22.908  19.890  4.00  0.00           N  
ATOM   1255  OP1  DG A  39     -26.373 -16.976  20.940  4.00  0.00           O  
ATOM   1256  OP2  DG A  39     -24.084 -18.165  21.180  6.00  0.00           O1-
ATOM   1257  H1   DG A  39     -22.583 -26.820  21.580  7.00  0.00           H  
ATOM   1258  H8   DG A  39     -24.667 -20.958  19.930  5.00  0.00           H  
ATOM   1259  H1'  DG A  39     -26.295 -23.512  18.130  3.00  0.00           H  
ATOM   1260  H2'  DG A  39     -27.656 -23.693  20.430  1.00  0.00           H  
ATOM   1261  H21  DG A  39     -24.268 -28.291  21.050  6.00  0.00           H  
ATOM   1262  H3'  DG A  39     -27.426 -21.347  21.000  1.00  0.00           H  
ATOM   1263  H22  DG A  39     -25.849 -27.786  20.640  4.00  0.00           H  
ATOM   1264  H4'  DG A  39     -28.323 -20.677  18.240  1.00  0.00           H  
ATOM   1265  H5'  DG A  39     -27.104 -18.678  18.500  7.00  0.00           H  
ATOM   1266 H2''  DG A  39     -28.479 -23.218  18.910  0.00  0.00           H  
ATOM   1267 H5''  DG A  39     -28.040 -19.032  19.990  6.00  0.00           H  
ATOM   1268  P    DT A  40     -30.261 -21.613  21.660  9.00  0.00           P  
ATOM   1269  C5'  DT A  40     -30.861 -24.044  20.900  5.00  0.00           C  
ATOM   1270  O5'  DT A  40     -30.417 -23.151  21.930  4.00  0.00           O  
ATOM   1271  C4'  DT A  40     -30.639 -25.549  21.220  9.00  0.00           C  
ATOM   1272  O4'  DT A  40     -29.257 -25.712  21.330  5.00  0.00           O  
ATOM   1273  C3'  DT A  40     -31.252 -25.975  22.560  8.00  0.00           C  
ATOM   1274  O3'  DT A  40     -31.857 -27.280  22.300  8.00  0.00           O  
ATOM   1275  C2'  DT A  40     -30.024 -26.009  23.550  8.00  0.00           C  
ATOM   1276  C1'  DT A  40     -28.857 -26.235  22.650  7.00  0.00           C  
ATOM   1277  N1   DT A  40     -27.647 -25.684  23.170  1.00  0.00           N  
ATOM   1278  C2   DT A  40     -26.685 -26.572  23.720  5.00  0.00           C  
ATOM   1279  O2   DT A  40     -26.761 -27.791  23.630  1.00  0.00           O  
ATOM   1280  N3   DT A  40     -25.573 -25.993  24.170  5.00  0.00           N  
ATOM   1281  C4   DT A  40     -25.240 -24.680  24.040  7.00  0.00           C  
ATOM   1282  O4   DT A  40     -24.101 -24.329  24.300  3.00  0.00           O  
ATOM   1283  C5   DT A  40     -26.315 -23.797  23.600  1.00  0.00           C  
ATOM   1284  C6   DT A  40     -27.501 -24.326  23.180  7.00  0.00           C  
ATOM   1285  C7   DT A  40     -26.085 -22.337  23.600  5.00  0.00           C  
ATOM   1286  OP1  DT A  40     -31.660 -21.141  21.500  9.00  0.00           O  
ATOM   1287  OP2  DT A  40     -29.423 -21.121  22.710  3.00  0.00           O1-
ATOM   1288  H3   DT A  40     -24.871 -26.654  24.540  3.00  0.00           H  
ATOM   1289  H6   DT A  40     -28.305 -23.666  22.890  7.00  0.00           H  
ATOM   1290  H1'  DT A  40     -28.698 -27.274  22.420  2.00  0.00           H  
ATOM   1291  H2'  DT A  40     -30.003 -25.035  23.920  0.00  0.00           H  
ATOM   1292  H3'  DT A  40     -32.070 -25.299  22.990  2.00  0.00           H  
ATOM   1293  H4'  DT A  40     -30.965 -26.162  20.400  2.00  0.00           H  
ATOM   1294  H5'  DT A  40     -30.319 -23.945  19.970  8.00  0.00           H  
ATOM   1295  H71  DT A  40     -27.041 -21.851  23.790  5.00  0.00           H  
ATOM   1296  H72  DT A  40     -25.392 -22.066  24.380  9.00  0.00           H  
ATOM   1297  H73  DT A  40     -25.801 -22.028  22.650  0.00  0.00           H  
ATOM   1298 H2''  DT A  40     -30.159 -26.847  24.220  3.00  0.00           H  
ATOM   1299 H5''  DT A  40     -31.989 -23.954  20.760  3.00  0.00           H  
ATOM   1300  P    DT A  41     -32.865 -27.958  23.310  3.00  0.00           P  
ATOM   1301  C5'  DT A  41     -31.136 -29.490  24.490  2.00  0.00           C  
ATOM   1302  O5'  DT A  41     -32.014 -28.371  24.520  1.00  0.00           O  
ATOM   1303  C4'  DT A  41     -30.265 -29.671  25.780  4.00  0.00           C  
ATOM   1304  O4'  DT A  41     -29.303 -28.645  25.930  4.00  0.00           O  
ATOM   1305  C3'  DT A  41     -30.998 -29.671  27.090  8.00  0.00           C  
ATOM   1306  O3'  DT A  41     -30.367 -30.644  27.930  1.00  0.00           O  
ATOM   1307  C2'  DT A  41     -30.742 -28.276  27.710  6.00  0.00           C  
ATOM   1308  C1'  DT A  41     -29.311 -28.231  27.260  9.00  0.00           C  
ATOM   1309  N1   DT A  41     -28.704 -26.905  27.230  1.00  0.00           N  
ATOM   1310  C2   DT A  41     -27.357 -26.904  27.480  2.00  0.00           C  
ATOM   1311  O2   DT A  41     -26.612 -27.879  27.470  4.00  0.00           O  
ATOM   1312  N3   DT A  41     -26.763 -25.702  27.430  2.00  0.00           N  
ATOM   1313  C4   DT A  41     -27.389 -24.513  27.060  4.00  0.00           C  
ATOM   1314  O4   DT A  41     -26.669 -23.480  27.060  0.00  0.00           O  
ATOM   1315  C5   DT A  41     -28.836 -24.628  26.820  3.00  0.00           C  
ATOM   1316  C6   DT A  41     -29.401 -25.795  26.960  1.00  0.00           C  
ATOM   1317  C7   DT A  41     -29.656 -23.492  26.380  4.00  0.00           C  
ATOM   1318  OP1  DT A  41     -33.370 -29.213  22.770  3.00  0.00           O  
ATOM   1319  OP2  DT A  41     -33.834 -26.951  23.780  9.00  0.00           O1-
ATOM   1320  H3   DT A  41     -25.731 -25.651  27.480  9.00  0.00           H  
ATOM   1321  H6   DT A  41     -30.409 -25.903  26.870  5.00  0.00           H  
ATOM   1322  H1'  DT A  41     -28.629 -28.983  27.780  2.00  0.00           H  
ATOM   1323  H2'  DT A  41     -31.382 -27.638  27.160  8.00  0.00           H  
ATOM   1324  H3'  DT A  41     -32.059 -29.775  26.850  5.00  0.00           H  
ATOM   1325  H4'  DT A  41     -29.793 -30.583  25.710  5.00  0.00           H  
ATOM   1326  H5'  DT A  41     -30.389 -29.313  23.710  6.00  0.00           H  
ATOM   1327  H71  DT A  41     -30.685 -23.698  26.240  6.00  0.00           H  
ATOM   1328  H72  DT A  41     -29.586 -22.646  27.130  4.00  0.00           H  
ATOM   1329  H73  DT A  41     -29.273 -23.058  25.460  5.00  0.00           H  
ATOM   1330 H2''  DT A  41     -30.889 -28.355  28.790  7.00  0.00           H  
ATOM   1331 H5''  DT A  41     -31.677 -30.424  24.400  8.00  0.00           H  
ATOM   1332  P    DA A  42     -30.718 -32.206  27.840  7.00  0.00           P  
ATOM   1333  C5'  DA A  42     -28.462 -33.334  28.490  5.00  0.00           C  
ATOM   1334  O5'  DA A  42     -29.736 -32.863  28.890  4.00  0.00           O  
ATOM   1335  C4'  DA A  42     -27.409 -33.370  29.560  7.00  0.00           C  
ATOM   1336  O4'  DA A  42     -26.711 -32.117  29.690  5.00  0.00           O  
ATOM   1337  C3'  DA A  42     -27.998 -33.655  30.970  6.00  0.00           C  
ATOM   1338  O3'  DA A  42     -27.033 -34.452  31.750  0.00  0.00           O  
ATOM   1339  C2'  DA A  42     -28.238 -32.252  31.520  2.00  0.00           C  
ATOM   1340  C1'  DA A  42     -27.035 -31.490  30.930  0.00  0.00           C  
ATOM   1341  N1   DA A  42     -25.177 -26.809  31.520  0.00  0.00           N  
ATOM   1342  C2   DA A  42     -24.518 -27.965  31.620  1.00  0.00           C  
ATOM   1343  N3   DA A  42     -25.101 -29.119  31.220  1.00  0.00           N  
ATOM   1344  C4   DA A  42     -26.397 -29.037  30.840  2.00  0.00           C  
ATOM   1345  C5   DA A  42     -27.087 -27.869  30.730  4.00  0.00           C  
ATOM   1346  C6   DA A  42     -26.396 -26.756  31.020  8.00  0.00           C  
ATOM   1347  N6   DA A  42     -26.895 -25.516  30.850  9.00  0.00           N  
ATOM   1348  N7   DA A  42     -28.398 -28.130  30.270  3.00  0.00           N  
ATOM   1349  C8   DA A  42     -28.498 -29.423  30.270  3.00  0.00           C  
ATOM   1350  N9   DA A  42     -27.291 -30.060  30.550  8.00  0.00           N  
ATOM   1351  OP1  DA A  42     -30.504 -32.791  26.500  2.00  0.00           O  
ATOM   1352  OP2  DA A  42     -32.089 -32.307  28.430  1.00  0.00           O1-
ATOM   1353  H2   DA A  42     -23.496 -27.980  32.070  7.00  0.00           H  
ATOM   1354  H8   DA A  42     -29.380 -29.896  30.140  2.00  0.00           H  
ATOM   1355  H1'  DA A  42     -26.186 -31.577  31.540  5.00  0.00           H  
ATOM   1356  H2'  DA A  42     -29.270 -31.928  31.070  5.00  0.00           H  
ATOM   1357  H3'  DA A  42     -28.954 -34.198  31.010  1.00  0.00           H  
ATOM   1358  H4'  DA A  42     -26.711 -34.179  29.280  1.00  0.00           H  
ATOM   1359  H5'  DA A  42     -28.049 -32.689  27.680  2.00  0.00           H  
ATOM   1360  H61  DA A  42     -26.394 -24.692  31.170  2.00  0.00           H  
ATOM   1361  H62  DA A  42     -27.787 -25.322  30.360  8.00  0.00           H  
ATOM   1362 H2''  DA A  42     -28.296 -32.164  32.630  9.00  0.00           H  
ATOM   1363 H5''  DA A  42     -28.554 -34.382  28.160  2.00  0.00           H  
ATOM   1364  P    DG A  43     -27.269 -34.948  33.270  3.00  0.00           P  
ATOM   1365  C5'  DG A  43     -25.245 -33.560  34.190  4.00  0.00           C  
ATOM   1366  O5'  DG A  43     -26.602 -33.763  34.140  9.00  0.00           O  
ATOM   1367  C4'  DG A  43     -24.791 -32.383  35.100  7.00  0.00           C  
ATOM   1368  O4'  DG A  43     -25.113 -31.078  34.420  3.00  0.00           O  
ATOM   1369  C3'  DG A  43     -25.564 -32.283  36.440  3.00  0.00           C  
ATOM   1370  O3'  DG A  43     -24.596 -31.906  37.400  2.00  0.00           O  
ATOM   1371  C2'  DG A  43     -26.640 -31.185  36.220  2.00  0.00           C  
ATOM   1372  C1'  DG A  43     -25.846 -30.232  35.270  4.00  0.00           C  
ATOM   1373  N1   DG A  43     -26.258 -25.322  34.590  9.00  0.00           N  
ATOM   1374  C2   DG A  43     -25.155 -26.055  34.790  0.00  0.00           C  
ATOM   1375  N2   DG A  43     -24.055 -25.430  35.120  3.00  0.00           N  
ATOM   1376  N3   DG A  43     -25.143 -27.397  34.900  2.00  0.00           N  
ATOM   1377  C4   DG A  43     -26.374 -27.931  34.530  3.00  0.00           C  
ATOM   1378  C5   DG A  43     -27.531 -27.334  34.260  2.00  0.00           C  
ATOM   1379  C6   DG A  43     -27.496 -25.867  34.230  4.00  0.00           C  
ATOM   1380  O6   DG A  43     -28.386 -25.017  34.030  6.00  0.00           O  
ATOM   1381  N7   DG A  43     -28.546 -28.301  34.070  4.00  0.00           N  
ATOM   1382  C8   DG A  43     -27.928 -29.438  34.220  7.00  0.00           C  
ATOM   1383  N9   DG A  43     -26.628 -29.271  34.560  7.00  0.00           N  
ATOM   1384  OP1  DG A  43     -26.550 -36.194  33.480  4.00  0.00           O  
ATOM   1385  OP2  DG A  43     -28.660 -34.852  33.640  0.00  0.00           O1-
ATOM   1386  H1   DG A  43     -26.186 -24.355  34.430  7.00  0.00           H  
ATOM   1387  H8   DG A  43     -28.330 -30.436  34.120  3.00  0.00           H  
ATOM   1388  H1'  DG A  43     -25.034 -29.733  35.830  3.00  0.00           H  
ATOM   1389  H2'  DG A  43     -27.536 -31.698  35.810  2.00  0.00           H  
ATOM   1390  H21  DG A  43     -24.060 -24.450  35.100  3.00  0.00           H  
ATOM   1391  H3'  DG A  43     -25.947 -33.182  36.740  7.00  0.00           H  
ATOM   1392  H22  DG A  43     -23.305 -25.984  35.420  1.00  0.00           H  
ATOM   1393  H4'  DG A  43     -23.725 -32.530  35.250  9.00  0.00           H  
ATOM   1394  H5'  DG A  43     -24.862 -33.284  33.140  9.00  0.00           H  
ATOM   1395 H2''  DG A  43     -26.858 -30.620  37.120  4.00  0.00           H  
ATOM   1396 H5''  DG A  43     -24.778 -34.490  34.460  8.00  0.00           H  
ATOM   1397  P    DG A  44     -24.719 -32.178  38.950  4.00  0.00           P  
ATOM   1398  C5'  DG A  44     -23.246 -30.122  39.440  9.00  0.00           C  
ATOM   1399  O5'  DG A  44     -24.536 -30.724  39.460  2.00  0.00           O  
ATOM   1400  C4'  DG A  44     -23.173 -28.600  39.290  6.00  0.00           C  
ATOM   1401  O4'  DG A  44     -23.958 -28.212  38.130  9.00  0.00           O  
ATOM   1402  C3'  DG A  44     -23.804 -27.813  40.440  6.00  0.00           C  
ATOM   1403  O3'  DG A  44     -23.154 -27.642  41.660  7.00  0.00           O  
ATOM   1404  C2'  DG A  44     -23.761 -26.438  39.710  9.00  0.00           C  
ATOM   1405  C1'  DG A  44     -24.296 -26.809  38.320  0.00  0.00           C  
ATOM   1406  N1   DG A  44     -27.624 -22.886  37.670  4.00  0.00           N  
ATOM   1407  C2   DG A  44     -26.263 -22.830  37.750  8.00  0.00           C  
ATOM   1408  N2   DG A  44     -25.640 -21.729  37.560  9.00  0.00           N  
ATOM   1409  N3   DG A  44     -25.523 -23.923  37.850  2.00  0.00           N  
ATOM   1410  C4   DG A  44     -26.181 -25.111  38.010  3.00  0.00           C  
ATOM   1411  C5   DG A  44     -27.570 -25.215  37.940  7.00  0.00           C  
ATOM   1412  C6   DG A  44     -28.377 -24.033  37.790  2.00  0.00           C  
ATOM   1413  O6   DG A  44     -29.621 -23.847  37.650  3.00  0.00           O  
ATOM   1414  N7   DG A  44     -27.958 -26.580  37.940  9.00  0.00           N  
ATOM   1415  C8   DG A  44     -26.839 -27.208  38.040  0.00  0.00           C  
ATOM   1416  N9   DG A  44     -25.736 -26.408  38.210  2.00  0.00           N  
ATOM   1417  OP1  DG A  44     -23.576 -33.025  39.390  3.00  0.00           O  
ATOM   1418  OP2  DG A  44     -26.108 -32.537  39.250  5.00  0.00           O1-
ATOM   1419  H1   DG A  44     -28.197 -22.084  37.510  1.00  0.00           H  
ATOM   1420  H8   DG A  44     -27.003 -28.297  38.040  2.00  0.00           H  
ATOM   1421  H1'  DG A  44     -23.829 -26.177  37.570  8.00  0.00           H  
ATOM   1422  H2'  DG A  44     -24.437 -25.785  40.240  6.00  0.00           H  
ATOM   1423  H21  DG A  44     -26.110 -20.852  37.410  8.00  0.00           H  
ATOM   1424  H3'  DG A  44     -24.812 -28.171  40.490  1.00  0.00           H  
ATOM   1425  H22  DG A  44     -24.666 -21.711  37.770  2.00  0.00           H  
ATOM   1426  H4'  DG A  44     -22.096 -28.399  39.160  9.00  0.00           H  
ATOM   1427  H5'  DG A  44     -22.678 -30.447  38.500  4.00  0.00           H  
ATOM   1428 H2''  DG A  44     -22.798 -26.007  39.430  8.00  0.00           H  
ATOM   1429 H5''  DG A  44     -22.587 -30.407  40.280  2.00  0.00           H  
ATOM   1430  P   DG3 A  45     -24.042 -27.395  43.050  1.00  0.00           P  
ATOM   1431  C5' DG3 A  45     -23.142 -24.961  43.210  0.00  0.00           C  
ATOM   1432  O5' DG3 A  45     -24.235 -25.822  42.980  1.00  0.00           O  
ATOM   1433  C4' DG3 A  45     -23.330 -23.518  42.910  8.00  0.00           C  
ATOM   1434  O4' DG3 A  45     -23.924 -23.364  41.710  1.00  0.00           O  
ATOM   1435  C3' DG3 A  45     -24.074 -22.633  43.970  7.00  0.00           C  
ATOM   1436  O3' DG3 A  45     -23.273 -22.119  45.020  6.00  0.00           O  
ATOM   1437  C2' DG3 A  45     -24.471 -21.491  43.010  2.00  0.00           C  
ATOM   1438  C1' DG3 A  45     -24.686 -22.156  41.610  4.00  0.00           C  
ATOM   1439  N1  DG3 A  45     -29.418 -20.607  40.550  8.00  0.00           N  
ATOM   1440  C2  DG3 A  45     -28.295 -19.850  40.700  3.00  0.00           C  
ATOM   1441  N2  DG3 A  45     -28.465 -18.585  40.480  8.00  0.00           N  
ATOM   1442  N3  DG3 A  45     -27.029 -20.325  40.960  5.00  0.00           N  
ATOM   1443  C4  DG3 A  45     -27.085 -21.708  41.070  0.00  0.00           C  
ATOM   1444  C5  DG3 A  45     -28.170 -22.543  40.850  7.00  0.00           C  
ATOM   1445  C6  DG3 A  45     -29.469 -21.966  40.660  4.00  0.00           C  
ATOM   1446  O6  DG3 A  45     -30.559 -22.515  40.490  2.00  0.00           O  
ATOM   1447  N7  DG3 A  45     -27.828 -23.894  41.080  1.00  0.00           N  
ATOM   1448  C8  DG3 A  45     -26.577 -23.809  41.430  7.00  0.00           C  
ATOM   1449  N9  DG3 A  45     -26.038 -22.582  41.340  7.00  0.00           N  
ATOM   1450  OP1 DG3 A  45     -23.154 -27.646  44.190  3.00  0.00           O  
ATOM   1451  OP2 DG3 A  45     -25.396 -28.041  42.960  2.00  0.00           O  
ATOM   1452 HO3' DG3 A  45     -23.379 -21.144  45.130  6.00  0.00           H  
ATOM   1453  H1  DG3 A  45     -30.312 -20.261  40.130  4.00  0.00           H  
ATOM   1454  H8  DG3 A  45     -25.990 -24.689  41.650  3.00  0.00           H  
ATOM   1455  H1' DG3 A  45     -24.364 -21.528  40.740  8.00  0.00           H  
ATOM   1456  H2' DG3 A  45     -25.378 -21.042  43.470  1.00  0.00           H  
ATOM   1457  H21 DG3 A  45     -29.382 -18.233  40.310  7.00  0.00           H  
ATOM   1458  H3' DG3 A  45     -24.984 -23.128  44.260  2.00  0.00           H  
ATOM   1459  H22 DG3 A  45     -27.587 -18.226  40.720  1.00  0.00           H  
ATOM   1460  H4' DG3 A  45     -22.346 -23.100  42.720  3.00  0.00           H  
ATOM   1461  H5' DG3 A  45     -22.291 -25.399  42.610  1.00  0.00           H  
ATOM   1462 H2'' DG3 A  45     -23.566 -20.806  42.990  0.00  0.00           H  
ATOM   1463 H5'' DG3 A  45     -22.856 -25.106  44.290  5.00  0.00           H  
ATOM   1464  C5' DC5 A  46     -35.966 -14.562  37.010  5.00  0.00           C  
ATOM   1465  O5' DC5 A  46     -36.074 -15.839  36.420  3.00  0.00           O  
ATOM   1466  C4' DC5 A  46     -34.575 -14.378  37.570  5.00  0.00           C  
ATOM   1467  O4' DC5 A  46     -34.263 -15.373  38.600  9.00  0.00           O  
ATOM   1468  C3' DC5 A  46     -33.546 -14.525  36.400  3.00  0.00           C  
ATOM   1469  O3' DC5 A  46     -32.566 -13.551  36.680  9.00  0.00           O  
ATOM   1470  C2' DC5 A  46     -33.001 -15.925  36.650  4.00  0.00           C  
ATOM   1471  C1' DC5 A  46     -33.115 -16.092  38.190  0.00  0.00           C  
ATOM   1472  N1  DC5 A  46     -33.120 -17.505  38.640  1.00  0.00           N  
ATOM   1473  C2  DC5 A  46     -31.970 -18.052  39.090  3.00  0.00           C  
ATOM   1474  O2  DC5 A  46     -30.938 -17.349  39.260  6.00  0.00           O  
ATOM   1475  N3  DC5 A  46     -31.807 -19.374  39.300  6.00  0.00           N  
ATOM   1476  C4  DC5 A  46     -32.808 -20.112  38.790  6.00  0.00           C  
ATOM   1477  N4  DC5 A  46     -32.684 -21.366  38.930  1.00  0.00           N  
ATOM   1478  C5  DC5 A  46     -34.077 -19.635  38.340  9.00  0.00           C  
ATOM   1479  C6  DC5 A  46     -34.207 -18.298  38.300  6.00  0.00           C  
ATOM   1480 HO5' DC5 A  46     -36.444 -16.310  37.110  2.00  0.00           H  
ATOM   1481  H5  DC5 A  46     -34.923 -20.312  38.030  0.00  0.00           H  
ATOM   1482  H6  DC5 A  46     -35.253 -17.871  38.050  0.00  0.00           H  
ATOM   1483  H1' DC5 A  46     -32.254 -15.561  38.720  1.00  0.00           H  
ATOM   1484  H2' DC5 A  46     -33.619 -16.625  36.140  1.00  0.00           H  
ATOM   1485  H3' DC5 A  46     -33.905 -14.381  35.420  5.00  0.00           H  
ATOM   1486  H4' DC5 A  46     -34.421 -13.395  37.960  5.00  0.00           H  
ATOM   1487  H41 DC5 A  46     -31.808 -21.615  39.420  1.00  0.00           H  
ATOM   1488  H5' DC5 A  46     -36.744 -14.394  37.790  7.00  0.00           H  
ATOM   1489  H42 DC5 A  46     -33.426 -22.028  38.700  5.00  0.00           H  
ATOM   1490 H2'' DC5 A  46     -32.017 -15.984  36.270  9.00  0.00           H  
ATOM   1491 H5'' DC5 A  46     -36.152 -13.798  36.300  9.00  0.00           H  
ATOM   1492  P    DC A  47     -31.634 -12.860  35.540  9.00  0.00           P  
ATOM   1493  C5'  DC A  47     -29.248 -13.481  36.740  8.00  0.00           C  
ATOM   1494  O5'  DC A  47     -30.312 -13.729  35.820  0.00  0.00           O  
ATOM   1495  C4'  DC A  47     -28.274 -14.670  36.760  9.00  0.00           C  
ATOM   1496  O4'  DC A  47     -28.778 -15.980  37.000  7.00  0.00           O  
ATOM   1497  C3'  DC A  47     -27.656 -14.873  35.350  0.00  0.00           C  
ATOM   1498  O3'  DC A  47     -26.241 -14.597  35.540  3.00  0.00           O  
ATOM   1499  C2'  DC A  47     -27.914 -16.317  34.880  0.00  0.00           C  
ATOM   1500  C1'  DC A  47     -28.192 -16.935  36.200  7.00  0.00           C  
ATOM   1501  N1   DC A  47     -29.064 -18.147  36.340  0.00  0.00           N  
ATOM   1502  C2   DC A  47     -28.580 -19.330  36.910  0.00  0.00           C  
ATOM   1503  O2   DC A  47     -27.399 -19.329  37.410  6.00  0.00           O  
ATOM   1504  N3   DC A  47     -29.284 -20.489  36.900  7.00  0.00           N  
ATOM   1505  C4   DC A  47     -30.448 -20.478  36.350  0.00  0.00           C  
ATOM   1506  N4   DC A  47     -30.958 -21.669  36.310  9.00  0.00           N  
ATOM   1507  C5   DC A  47     -31.024 -19.321  35.760  1.00  0.00           C  
ATOM   1508  C6   DC A  47     -30.291 -18.151  35.750  2.00  0.00           C  
ATOM   1509  OP1  DC A  47     -31.333 -11.455  35.780  8.00  0.00           O  
ATOM   1510  OP2  DC A  47     -32.087 -13.192  34.200  0.00  0.00           O1-
ATOM   1511  H5   DC A  47     -32.045 -19.418  35.360  0.00  0.00           H  
ATOM   1512  H6   DC A  47     -30.718 -17.331  35.260  3.00  0.00           H  
ATOM   1513  H1'  DC A  47     -27.147 -17.092  36.560  9.00  0.00           H  
ATOM   1514  H2'  DC A  47     -28.994 -16.275  34.370  1.00  0.00           H  
ATOM   1515  H3'  DC A  47     -28.233 -14.306  34.640  4.00  0.00           H  
ATOM   1516  H4'  DC A  47     -27.460 -14.419  37.380  1.00  0.00           H  
ATOM   1517  H41  DC A  47     -31.849 -21.766  35.840  5.00  0.00           H  
ATOM   1518  H5'  DC A  47     -29.611 -13.276  37.740  5.00  0.00           H  
ATOM   1519  H42  DC A  47     -30.485 -22.545  36.540  9.00  0.00           H  
ATOM   1520 H2''  DC A  47     -27.152 -16.832  34.300  8.00  0.00           H  
ATOM   1521 H5''  DC A  47     -28.684 -12.609  36.470  9.00  0.00           H  
ATOM   1522  P    DC A  48     -25.114 -14.774  34.330  7.00  0.00           P  
ATOM   1523  C5'  DC A  48     -23.674 -16.422  35.940  5.00  0.00           C  
ATOM   1524  O5'  DC A  48     -24.449 -16.172  34.800  6.00  0.00           O  
ATOM   1525  C4'  DC A  48     -23.093 -17.872  36.120  1.00  0.00           C  
ATOM   1526  O4'  DC A  48     -24.051 -18.958  36.070  3.00  0.00           O  
ATOM   1527  C3'  DC A  48     -22.043 -18.095  34.930  7.00  0.00           C  
ATOM   1528  O3'  DC A  48     -20.904 -18.795  35.450  3.00  0.00           O  
ATOM   1529  C2'  DC A  48     -22.908 -19.054  34.030  1.00  0.00           C  
ATOM   1530  C1'  DC A  48     -23.667 -19.907  35.060  6.00  0.00           C  
ATOM   1531  N1   DC A  48     -24.914 -20.477  34.570  5.00  0.00           N  
ATOM   1532  C2   DC A  48     -25.138 -21.863  34.500  9.00  0.00           C  
ATOM   1533  O2   DC A  48     -24.205 -22.613  34.740  4.00  0.00           O  
ATOM   1534  N3   DC A  48     -26.316 -22.401  34.130  1.00  0.00           N  
ATOM   1535  C4   DC A  48     -27.292 -21.488  33.910  1.00  0.00           C  
ATOM   1536  N4   DC A  48     -28.505 -21.962  33.950  8.00  0.00           N  
ATOM   1537  C5   DC A  48     -27.094 -20.073  33.970  4.00  0.00           C  
ATOM   1538  C6   DC A  48     -25.889 -19.594  34.310  4.00  0.00           C  
ATOM   1539  OP1  DC A  48     -24.222 -13.639  34.500  4.00  0.00           O  
ATOM   1540  OP2  DC A  48     -25.841 -14.907  33.020  6.00  0.00           O1-
ATOM   1541  H5   DC A  48     -27.900 -19.413  33.870  4.00  0.00           H  
ATOM   1542  H6   DC A  48     -25.687 -18.488  34.400  3.00  0.00           H  
ATOM   1543  H1'  DC A  48     -23.014 -20.634  35.510  8.00  0.00           H  
ATOM   1544  H2'  DC A  48     -23.513 -18.510  33.300  8.00  0.00           H  
ATOM   1545  H3'  DC A  48     -21.768 -17.159  34.470  9.00  0.00           H  
ATOM   1546  H4'  DC A  48     -22.549 -17.892  37.080  7.00  0.00           H  
ATOM   1547  H41  DC A  48     -28.521 -22.974  34.100  4.00  0.00           H  
ATOM   1548  H5'  DC A  48     -24.288 -16.270  36.820  0.00  0.00           H  
ATOM   1549  H42  DC A  48     -29.382 -21.344  33.970  0.00  0.00           H  
ATOM   1550 H2''  DC A  48     -22.237 -19.714  33.560  7.00  0.00           H  
ATOM   1551 H5''  DC A  48     -22.802 -15.736  35.990  7.00  0.00           H  
ATOM   1552  P    DT A  49     -19.530 -19.034  34.610  2.00  0.00           P  
ATOM   1553  C5'  DT A  49     -18.881 -21.508  35.380  3.00  0.00           C  
ATOM   1554  O5'  DT A  49     -19.468 -20.645  34.370  4.00  0.00           O  
ATOM   1555  C4'  DT A  49     -18.848 -22.915  34.860  7.00  0.00           C  
ATOM   1556  O4'  DT A  49     -20.104 -23.416  34.360  1.00  0.00           O  
ATOM   1557  C3'  DT A  49     -17.792 -23.129  33.740  4.00  0.00           C  
ATOM   1558  O3'  DT A  49     -17.162 -24.328  34.160  9.00  0.00           O  
ATOM   1559  C2'  DT A  49     -18.625 -23.261  32.440  8.00  0.00           C  
ATOM   1560  C1'  DT A  49     -19.876 -23.933  33.060  6.00  0.00           C  
ATOM   1561  N1   DT A  49     -21.118 -23.778  32.230  9.00  0.00           N  
ATOM   1562  C2   DT A  49     -21.872 -24.898  32.050  8.00  0.00           C  
ATOM   1563  O2   DT A  49     -21.570 -26.085  32.380  6.00  0.00           O  
ATOM   1564  N3   DT A  49     -23.129 -24.710  31.430  5.00  0.00           N  
ATOM   1565  C4   DT A  49     -23.637 -23.464  31.060  6.00  0.00           C  
ATOM   1566  O4   DT A  49     -24.830 -23.409  30.720  8.00  0.00           O  
ATOM   1567  C5   DT A  49     -22.756 -22.359  31.210  7.00  0.00           C  
ATOM   1568  C6   DT A  49     -21.499 -22.504  31.750  1.00  0.00           C  
ATOM   1569  C7   DT A  49     -23.280 -20.954  30.950  6.00  0.00           C  
ATOM   1570  OP1  DT A  49     -18.371 -18.673  35.440  4.00  0.00           O  
ATOM   1571  OP2  DT A  49     -19.640 -18.467  33.230  9.00  0.00           O1-
ATOM   1572  H3   DT A  49     -23.775 -25.483  31.510  2.00  0.00           H  
ATOM   1573  H6   DT A  49     -20.871 -21.621  31.910  8.00  0.00           H  
ATOM   1574  H1'  DT A  49     -19.666 -24.978  33.190  8.00  0.00           H  
ATOM   1575  H2'  DT A  49     -18.930 -22.313  32.030  3.00  0.00           H  
ATOM   1576  H3'  DT A  49     -17.022 -22.308  33.710  7.00  0.00           H  
ATOM   1577  H4'  DT A  49     -18.569 -23.519  35.680  5.00  0.00           H  
ATOM   1578  H5'  DT A  49     -19.654 -21.476  36.210  2.00  0.00           H  
ATOM   1579  H71  DT A  49     -24.134 -20.823  31.560  7.00  0.00           H  
ATOM   1580  H72  DT A  49     -22.487 -20.308  31.240  5.00  0.00           H  
ATOM   1581  H73  DT A  49     -23.467 -20.940  29.870  5.00  0.00           H  
ATOM   1582 H2''  DT A  49     -18.075 -23.761  31.710  4.00  0.00           H  
ATOM   1583 H5''  DT A  49     -17.903 -21.212  35.750  1.00  0.00           H  
ATOM   1584  P    DA A  50     -15.837 -24.800  33.490  5.00  0.00           P  
ATOM   1585  C5'  DA A  50     -17.149 -26.759  32.520  2.00  0.00           C  
ATOM   1586  O5'  DA A  50     -16.243 -25.689  32.320  8.00  0.00           O  
ATOM   1587  C4'  DA A  50     -17.783 -27.271  31.200  7.00  0.00           C  
ATOM   1588  O4'  DA A  50     -18.952 -26.520  30.940  9.00  0.00           O  
ATOM   1589  C3'  DA A  50     -16.907 -27.181  29.930  3.00  0.00           C  
ATOM   1590  O3'  DA A  50     -16.984 -28.398  29.160  4.00  0.00           O  
ATOM   1591  C2'  DA A  50     -17.614 -26.124  29.070  2.00  0.00           C  
ATOM   1592  C1'  DA A  50     -19.058 -26.380  29.530  8.00  0.00           C  
ATOM   1593  N1   DA A  50     -23.868 -25.319  28.140  0.00  0.00           N  
ATOM   1594  C2   DA A  50     -23.317 -26.424  28.690  0.00  0.00           C  
ATOM   1595  N3   DA A  50     -22.036 -26.552  29.030  3.00  0.00           N  
ATOM   1596  C4   DA A  50     -21.304 -25.434  28.760  3.00  0.00           C  
ATOM   1597  C5   DA A  50     -21.749 -24.257  28.320  6.00  0.00           C  
ATOM   1598  C6   DA A  50     -23.082 -24.270  27.940  9.00  0.00           C  
ATOM   1599  N6   DA A  50     -23.793 -23.371  27.260  3.00  0.00           N  
ATOM   1600  N7   DA A  50     -20.663 -23.333  28.240  4.00  0.00           N  
ATOM   1601  C8   DA A  50     -19.698 -23.987  28.750  2.00  0.00           C  
ATOM   1602  N9   DA A  50     -19.969 -25.295  29.100  4.00  0.00           N  
ATOM   1603  OP1  DA A  50     -15.038 -25.645  34.450  4.00  0.00           O  
ATOM   1604  OP2  DA A  50     -15.091 -23.702  32.830  4.00  0.00           O1-
ATOM   1605  H2   DA A  50     -23.971 -27.300  28.870  6.00  0.00           H  
ATOM   1606  H8   DA A  50     -18.701 -23.504  28.740  6.00  0.00           H  
ATOM   1607  H1'  DA A  50     -19.444 -27.322  29.120  9.00  0.00           H  
ATOM   1608  H2'  DA A  50     -17.185 -25.169  29.330  3.00  0.00           H  
ATOM   1609  H3'  DA A  50     -15.867 -27.001  30.120  4.00  0.00           H  
ATOM   1610  H4'  DA A  50     -18.010 -28.392  31.300  9.00  0.00           H  
ATOM   1611  H5'  DA A  50     -17.977 -26.468  33.180  0.00  0.00           H  
ATOM   1612  H61  DA A  50     -24.765 -23.544  27.250  5.00  0.00           H  
ATOM   1613  H62  DA A  50     -23.312 -22.569  26.840  0.00  0.00           H  
ATOM   1614 H2''  DA A  50     -17.462 -26.307  28.030  1.00  0.00           H  
ATOM   1615 H5''  DA A  50     -16.558 -27.498  33.030  2.00  0.00           H  
ATOM   1616  P    DA A  51     -15.736 -28.964  28.420  4.00  0.00           P  
ATOM   1617  C5'  DA A  51     -16.731 -31.365  28.460  9.00  0.00           C  
ATOM   1618  O5'  DA A  51     -16.344 -30.267  27.670  8.00  0.00           O  
ATOM   1619  C4'  DA A  51     -18.066 -31.946  28.000  2.00  0.00           C  
ATOM   1620  O4'  DA A  51     -19.019 -30.875  27.930  5.00  0.00           O  
ATOM   1621  C3'  DA A  51     -18.012 -32.606  26.630  3.00  0.00           C  
ATOM   1622  O3'  DA A  51     -18.862 -33.799  26.640  1.00  0.00           O  
ATOM   1623  C2'  DA A  51     -18.536 -31.489  25.740  0.00  0.00           C  
ATOM   1624  C1'  DA A  51     -19.558 -30.830  26.640  6.00  0.00           C  
ATOM   1625  N1   DA A  51     -22.775 -27.129  25.380  1.00  0.00           N  
ATOM   1626  C2   DA A  51     -22.976 -28.419  25.630  9.00  0.00           C  
ATOM   1627  N3   DA A  51     -22.090 -29.304  25.990  3.00  0.00           N  
ATOM   1628  C4   DA A  51     -20.830 -28.799  25.940  1.00  0.00           C  
ATOM   1629  C5   DA A  51     -20.433 -27.470  25.710  5.00  0.00           C  
ATOM   1630  C6   DA A  51     -21.551 -26.674  25.370  1.00  0.00           C  
ATOM   1631  N6   DA A  51     -21.544 -25.357  25.190  7.00  0.00           N  
ATOM   1632  N7   DA A  51     -19.043 -27.287  25.790  9.00  0.00           N  
ATOM   1633  C8   DA A  51     -18.710 -28.457  26.190  5.00  0.00           C  
ATOM   1634  N9   DA A  51     -19.704 -29.418  26.260  8.00  0.00           N  
ATOM   1635  OP1  DA A  51     -14.721 -29.381  29.400  2.00  0.00           O  
ATOM   1636  OP2  DA A  51     -15.405 -27.914  27.450  1.00  0.00           O1-
ATOM   1637  H2   DA A  51     -24.060 -28.687  25.720  0.00  0.00           H  
ATOM   1638  H8   DA A  51     -17.704 -28.705  26.610  9.00  0.00           H  
ATOM   1639  H1'  DA A  51     -20.523 -31.385  26.630  5.00  0.00           H  
ATOM   1640  H2'  DA A  51     -17.667 -30.858  25.450  3.00  0.00           H  
ATOM   1641  H3'  DA A  51     -16.954 -32.965  26.450  1.00  0.00           H  
ATOM   1642  H4'  DA A  51     -18.409 -32.700  28.760  8.00  0.00           H  
ATOM   1643  H5'  DA A  51     -16.899 -31.033  29.530  1.00  0.00           H  
ATOM   1644  H61  DA A  51     -22.428 -24.968  24.920  2.00  0.00           H  
ATOM   1645  H62  DA A  51     -20.650 -24.960  25.070  8.00  0.00           H  
ATOM   1646 H2''  DA A  51     -19.035 -31.919  24.870  6.00  0.00           H  
ATOM   1647 H5''  DA A  51     -16.015 -32.156  28.480  0.00  0.00           H  
ATOM   1648  P    DC A  52     -18.720 -34.927  25.540  5.00  0.00           P  
ATOM   1649  C5'  DC A  52     -20.980 -34.194  24.520  0.00  0.00           C  
ATOM   1650  O5'  DC A  52     -19.602 -34.363  24.290  8.00  0.00           O  
ATOM   1651  C4'  DC A  52     -21.769 -33.623  23.300  6.00  0.00           C  
ATOM   1652  O4'  DC A  52     -21.788 -32.220  23.450  7.00  0.00           O  
ATOM   1653  C3'  DC A  52     -21.287 -33.965  21.870  7.00  0.00           C  
ATOM   1654  O3'  DC A  52     -22.503 -34.137  21.140  1.00  0.00           O  
ATOM   1655  C2'  DC A  52     -20.479 -32.723  21.590  6.00  0.00           C  
ATOM   1656  C1'  DC A  52     -21.322 -31.652  22.270  4.00  0.00           C  
ATOM   1657  N1   DC A  52     -20.567 -30.337  22.460  0.00  0.00           N  
ATOM   1658  C2   DC A  52     -21.398 -29.228  22.140  6.00  0.00           C  
ATOM   1659  O2   DC A  52     -22.608 -29.323  21.890  2.00  0.00           O  
ATOM   1660  N3   DC A  52     -20.855 -27.984  22.080  7.00  0.00           N  
ATOM   1661  C4   DC A  52     -19.607 -27.829  22.350  2.00  0.00           C  
ATOM   1662  N4   DC A  52     -19.260 -26.542  22.480  7.00  0.00           N  
ATOM   1663  C5   DC A  52     -18.614 -28.835  22.680  3.00  0.00           C  
ATOM   1664  C6   DC A  52     -19.199 -30.084  22.720  9.00  0.00           C  
ATOM   1665  OP1  DC A  52     -19.365 -36.131  26.090  8.00  0.00           O  
ATOM   1666  OP2  DC A  52     -17.333 -34.943  25.030  3.00  0.00           O1-
ATOM   1667  H5   DC A  52     -17.604 -28.593  22.930  1.00  0.00           H  
ATOM   1668  H6   DC A  52     -18.651 -30.972  22.880  6.00  0.00           H  
ATOM   1669  H1'  DC A  52     -22.218 -31.507  21.740  0.00  0.00           H  
ATOM   1670  H2'  DC A  52     -19.514 -32.782  22.090  1.00  0.00           H  
ATOM   1671  H3'  DC A  52     -20.690 -34.873  21.910  7.00  0.00           H  
ATOM   1672  H4'  DC A  52     -22.831 -34.046  23.380  8.00  0.00           H  
ATOM   1673  H41  DC A  52     -20.058 -26.021  22.140  2.00  0.00           H  
ATOM   1674  H5'  DC A  52     -21.108 -33.502  25.360  0.00  0.00           H  
ATOM   1675  H42  DC A  52     -18.335 -26.226  22.580  9.00  0.00           H  
ATOM   1676 H2''  DC A  52     -20.399 -32.505  20.560  7.00  0.00           H  
ATOM   1677 H5''  DC A  52     -21.388 -35.194  24.720  2.00  0.00           H  
ATOM   1678  P    DC A  53     -22.587 -34.248  19.560  9.00  0.00           P  
ATOM   1679  C5'  DC A  53     -24.626 -32.678  19.660  6.00  0.00           C  
ATOM   1680  O5'  DC A  53     -23.413 -33.041  19.090  8.00  0.00           O  
ATOM   1681  C4'  DC A  53     -25.418 -31.510  19.020  2.00  0.00           C  
ATOM   1682  O4'  DC A  53     -24.803 -30.295  19.400  9.00  0.00           O  
ATOM   1683  C3'  DC A  53     -25.418 -31.619  17.480  9.00  0.00           C  
ATOM   1684  O3'  DC A  53     -26.768 -31.274  17.060  7.00  0.00           O  
ATOM   1685  C2'  DC A  53     -24.402 -30.532  17.090  4.00  0.00           C  
ATOM   1686  C1'  DC A  53     -24.519 -29.530  18.260  7.00  0.00           C  
ATOM   1687  N1   DC A  53     -23.217 -28.907  18.440  3.00  0.00           N  
ATOM   1688  C2   DC A  53     -23.027 -27.724  17.850  7.00  0.00           C  
ATOM   1689  O2   DC A  53     -23.956 -27.140  17.280  8.00  0.00           O  
ATOM   1690  N3   DC A  53     -21.810 -27.181  17.930  7.00  0.00           N  
ATOM   1691  C4   DC A  53     -20.814 -27.804  18.470  6.00  0.00           C  
ATOM   1692  N4   DC A  53     -19.678 -27.139  18.520  7.00  0.00           N  
ATOM   1693  C5   DC A  53     -20.936 -29.063  19.040  7.00  0.00           C  
ATOM   1694  C6   DC A  53     -22.170 -29.584  18.940  2.00  0.00           C  
ATOM   1695  OP1  DC A  53     -23.406 -35.449  19.310  2.00  0.00           O  
ATOM   1696  OP2  DC A  53     -21.210 -34.102  18.930  1.00  0.00           O1-
ATOM   1697  H5   DC A  53     -20.066 -29.592  19.480  4.00  0.00           H  
ATOM   1698  H6   DC A  53     -22.425 -30.553  19.360  0.00  0.00           H  
ATOM   1699  H1'  DC A  53     -25.352 -28.843  18.090  9.00  0.00           H  
ATOM   1700  H2'  DC A  53     -23.446 -30.998  17.240  7.00  0.00           H  
ATOM   1701  H3'  DC A  53     -25.128 -32.604  17.180  1.00  0.00           H  
ATOM   1702  H4'  DC A  53     -26.448 -31.528  19.370  0.00  0.00           H  
ATOM   1703  H41  DC A  53     -19.618 -26.278  17.970  9.00  0.00           H  
ATOM   1704  H5'  DC A  53     -24.568 -32.525  20.720  0.00  0.00           H  
ATOM   1705  H42  DC A  53     -18.757 -27.477  18.980  7.00  0.00           H  
ATOM   1706 H2''  DC A  53     -24.442 -30.170  16.080  5.00  0.00           H  
ATOM   1707 H5''  DC A  53     -25.224 -33.563  19.640  1.00  0.00           H  
ATOM   1708  P    DC A  54     -27.300 -31.831  15.700  9.00  0.00           P  
ATOM   1709  C5'  DC A  54     -28.018 -29.712  14.420  0.00  0.00           C  
ATOM   1710  O5'  DC A  54     -27.049 -30.733  14.610  3.00  0.00           O  
ATOM   1711  C4'  DC A  54     -27.288 -28.606  13.560  1.00  0.00           C  
ATOM   1712  O4'  DC A  54     -26.207 -28.015  14.330  1.00  0.00           O  
ATOM   1713  C3'  DC A  54     -26.605 -29.006  12.230  7.00  0.00           C  
ATOM   1714  O3'  DC A  54     -27.618 -29.219  11.340  4.00  0.00           O  
ATOM   1715  C2'  DC A  54     -25.713 -27.758  11.980  8.00  0.00           C  
ATOM   1716  C1'  DC A  54     -25.413 -27.293  13.450  5.00  0.00           C  
ATOM   1717  N1   DC A  54     -23.979 -27.210  13.770  6.00  0.00           N  
ATOM   1718  C2   DC A  54     -23.223 -26.057  13.690  5.00  0.00           C  
ATOM   1719  O2   DC A  54     -23.711 -24.986  13.370  9.00  0.00           O  
ATOM   1720  N3   DC A  54     -21.905 -26.043  13.980  5.00  0.00           N  
ATOM   1721  C4   DC A  54     -21.382 -27.184  14.350  0.00  0.00           C  
ATOM   1722  N4   DC A  54     -20.118 -27.128  14.670  5.00  0.00           N  
ATOM   1723  C5   DC A  54     -22.069 -28.428  14.370  0.00  0.00           C  
ATOM   1724  C6   DC A  54     -23.361 -28.389  14.030  8.00  0.00           C  
ATOM   1725  OP1  DC A  54     -28.748 -31.943  15.910  8.00  0.00           O  
ATOM   1726  OP2  DC A  54     -26.606 -33.037  15.180  0.00  0.00           O1-
ATOM   1727  H5   DC A  54     -21.572 -29.358  14.530  2.00  0.00           H  
ATOM   1728  H6   DC A  54     -23.953 -29.307  14.060  5.00  0.00           H  
ATOM   1729  H1'  DC A  54     -25.789 -26.227  13.450  2.00  0.00           H  
ATOM   1730  H2'  DC A  54     -24.779 -27.961  11.460  9.00  0.00           H  
ATOM   1731  H3'  DC A  54     -25.949 -29.812  12.410  4.00  0.00           H  
ATOM   1732  H4'  DC A  54     -28.031 -27.889  13.260  6.00  0.00           H  
ATOM   1733  H41  DC A  54     -19.711 -26.209  14.330  2.00  0.00           H  
ATOM   1734  H5'  DC A  54     -28.298 -29.293  15.400  6.00  0.00           H  
ATOM   1735  H42  DC A  54     -19.614 -27.965  14.950  5.00  0.00           H  
ATOM   1736 H2''  DC A  54     -26.203 -26.929  11.450  2.00  0.00           H  
ATOM   1737 H5''  DC A  54     -28.867 -30.172  13.910  8.00  0.00           H  
ATOM   1738  P    DT A  55     -27.271 -29.485   9.840  5.00  0.00           P  
ATOM   1739  C5'  DT A  55     -27.560 -27.095   8.850  2.00  0.00           C  
ATOM   1740  O5'  DT A  55     -26.724 -28.164   9.150  7.00  0.00           O  
ATOM   1741  C4'  DT A  55     -26.630 -25.991   8.300  1.00  0.00           C  
ATOM   1742  O4'  DT A  55     -25.592 -25.585   9.210  9.00  0.00           O  
ATOM   1743  C3'  DT A  55     -25.832 -26.458   7.050  9.00  0.00           C  
ATOM   1744  O3'  DT A  55     -25.580 -25.430   6.100  2.00  0.00           O  
ATOM   1745  C2'  DT A  55     -24.470 -26.743   7.680  9.00  0.00           C  
ATOM   1746  C1'  DT A  55     -24.335 -25.532   8.620  2.00  0.00           C  
ATOM   1747  N1   DT A  55     -23.216 -25.555   9.590  1.00  0.00           N  
ATOM   1748  C2   DT A  55     -22.529 -24.324   9.820  7.00  0.00           C  
ATOM   1749  O2   DT A  55     -22.973 -23.162   9.530  9.00  0.00           O  
ATOM   1750  N3   DT A  55     -21.286 -24.406  10.370  8.00  0.00           N  
ATOM   1751  C4   DT A  55     -20.705 -25.532  10.810  6.00  0.00           C  
ATOM   1752  O4   DT A  55     -19.650 -25.533  11.390  8.00  0.00           O  
ATOM   1753  C5   DT A  55     -21.476 -26.796  10.650  3.00  0.00           C  
ATOM   1754  C6   DT A  55     -22.709 -26.753  10.020  1.00  0.00           C  
ATOM   1755  C7   DT A  55     -20.886 -28.106  11.180  4.00  0.00           C  
ATOM   1756  OP1  DT A  55     -28.509 -29.810   9.140  7.00  0.00           O  
ATOM   1757  OP2  DT A  55     -26.216 -30.476   9.730  6.00  0.00           O1-
ATOM   1758  H3   DT A  55     -20.877 -23.517  10.480  0.00  0.00           H  
ATOM   1759  H6   DT A  55     -23.340 -27.649   9.850  4.00  0.00           H  
ATOM   1760  H1'  DT A  55     -24.204 -24.681   7.930  4.00  0.00           H  
ATOM   1761  H2'  DT A  55     -24.413 -27.753   8.150  0.00  0.00           H  
ATOM   1762  H3'  DT A  55     -26.152 -27.412   6.670  4.00  0.00           H  
ATOM   1763  H4'  DT A  55     -27.196 -25.120   8.120  1.00  0.00           H  
ATOM   1764  H5'  DT A  55     -27.966 -26.635   9.770  7.00  0.00           H  
ATOM   1765  H71  DT A  55     -19.850 -28.260  10.750  2.00  0.00           H  
ATOM   1766  H72  DT A  55     -20.667 -27.892  12.230  1.00  0.00           H  
ATOM   1767  H73  DT A  55     -21.638 -28.955  11.050  8.00  0.00           H  
ATOM   1768 H2''  DT A  55     -23.707 -26.850   6.940  8.00  0.00           H  
ATOM   1769 H5''  DT A  55     -28.247 -27.431   8.110  5.00  0.00           H  
ATOM   1770  P    DA A  56     -25.869 -25.606   4.530  7.00  0.00           P  
ATOM   1771  C5'  DA A  56     -26.631 -23.140   4.230  9.00  0.00           C  
ATOM   1772  O5'  DA A  56     -25.752 -24.172   3.920  6.00  0.00           O  
ATOM   1773  C4'  DA A  56     -25.859 -21.799   4.350  5.00  0.00           C  
ATOM   1774  O4'  DA A  56     -24.944 -21.938   5.450  6.00  0.00           O  
ATOM   1775  C3'  DA A  56     -25.108 -21.344   3.080  0.00  0.00           C  
ATOM   1776  O3'  DA A  56     -25.222 -19.948   2.770  0.00  0.00           O  
ATOM   1777  C2'  DA A  56     -23.691 -21.692   3.490  0.00  0.00           C  
ATOM   1778  C1'  DA A  56     -23.718 -21.465   5.050  4.00  0.00           C  
ATOM   1779  N1   DA A  56     -19.087 -21.972   7.460  2.00  0.00           N  
ATOM   1780  C2   DA A  56     -19.845 -20.906   7.250  2.00  0.00           C  
ATOM   1781  N3   DA A  56     -21.083 -20.812   6.710  9.00  0.00           N  
ATOM   1782  C4   DA A  56     -21.592 -22.074   6.420  6.00  0.00           C  
ATOM   1783  C5   DA A  56     -20.968 -23.237   6.590  5.00  0.00           C  
ATOM   1784  C6   DA A  56     -19.694 -23.126   7.220  8.00  0.00           C  
ATOM   1785  N6   DA A  56     -18.987 -24.208   7.380  4.00  0.00           N  
ATOM   1786  N7   DA A  56     -21.728 -24.343   6.150  9.00  0.00           N  
ATOM   1787  C8   DA A  56     -22.848 -23.727   5.730  5.00  0.00           C  
ATOM   1788  N9   DA A  56     -22.773 -22.349   5.720  4.00  0.00           N  
ATOM   1789  OP1  DA A  56     -27.246 -26.032   4.490  4.00  0.00           O  
ATOM   1790  OP2  DA A  56     -24.824 -26.487   3.960  6.00  0.00           O1-
ATOM   1791  H2   DA A  56     -19.486 -19.996   7.480  3.00  0.00           H  
ATOM   1792  H8   DA A  56     -23.588 -24.247   5.200  6.00  0.00           H  
ATOM   1793  H1'  DA A  56     -23.623 -20.420   5.260  7.00  0.00           H  
ATOM   1794  H2'  DA A  56     -23.394 -22.688   3.160  1.00  0.00           H  
ATOM   1795  H3'  DA A  56     -25.446 -21.972   2.170  9.00  0.00           H  
ATOM   1796  H4'  DA A  56     -26.507 -20.990   4.700  5.00  0.00           H  
ATOM   1797  H5'  DA A  56     -27.034 -23.281   5.280  3.00  0.00           H  
ATOM   1798  H61  DA A  56     -18.027 -24.248   7.830  4.00  0.00           H  
ATOM   1799  H62  DA A  56     -19.418 -25.118   7.060  5.00  0.00           H  
ATOM   1800 H2''  DA A  56     -22.997 -20.969   3.030  9.00  0.00           H  
ATOM   1801 H5''  DA A  56     -27.485 -23.034   3.510  7.00  0.00           H  
ATOM   1802  P    DA A  57     -24.732 -19.320   1.430  5.00  0.00           P  
ATOM   1803  C5'  DA A  57     -22.782 -17.858   2.410  9.00  0.00           C  
ATOM   1804  O5'  DA A  57     -23.247 -19.000   1.710  7.00  0.00           O  
ATOM   1805  C4'  DA A  57     -21.281 -17.538   2.330  3.00  0.00           C  
ATOM   1806  O4'  DA A  57     -20.534 -18.405   3.200  9.00  0.00           O  
ATOM   1807  C3'  DA A  57     -20.785 -17.593   0.880  6.00  0.00           C  
ATOM   1808  O3'  DA A  57     -20.087 -16.453   0.510  7.00  0.00           O  
ATOM   1809  C2'  DA A  57     -19.868 -18.866   1.030  3.00  0.00           C  
ATOM   1810  C1'  DA A  57     -19.379 -18.619   2.450  8.00  0.00           C  
ATOM   1811  N1   DA A  57     -15.020 -21.313   2.910  9.00  0.00           N  
ATOM   1812  C2   DA A  57     -15.257 -20.006   2.680  6.00  0.00           C  
ATOM   1813  N3   DA A  57     -16.397 -19.401   2.760  5.00  0.00           N  
ATOM   1814  C4   DA A  57     -17.462 -20.198   2.940  7.00  0.00           C  
ATOM   1815  C5   DA A  57     -17.411 -21.540   3.250  2.00  0.00           C  
ATOM   1816  C6   DA A  57     -16.069 -22.052   3.230  6.00  0.00           C  
ATOM   1817  N6   DA A  57     -15.722 -23.310   3.280  0.00  0.00           N  
ATOM   1818  N7   DA A  57     -18.676 -22.062   3.540  9.00  0.00           N  
ATOM   1819  C8   DA A  57     -19.449 -20.976   3.400  3.00  0.00           C  
ATOM   1820  N9   DA A  57     -18.784 -19.835   3.010  6.00  0.00           N  
ATOM   1821  OP1  DA A  57     -25.484 -18.020   1.290  9.00  0.00           O  
ATOM   1822  OP2  DA A  57     -24.808 -20.355   0.340  6.00  0.00           O1-
ATOM   1823  H2   DA A  57     -14.417 -19.440   2.390  0.00  0.00           H  
ATOM   1824  H8   DA A  57     -20.540 -21.024   3.510  8.00  0.00           H  
ATOM   1825  H1'  DA A  57     -18.653 -17.803   2.450  5.00  0.00           H  
ATOM   1826  H2'  DA A  57     -20.443 -19.706   0.900  8.00  0.00           H  
ATOM   1827  H3'  DA A  57     -21.596 -17.876   0.170  4.00  0.00           H  
ATOM   1828  H4'  DA A  57     -21.091 -16.549   2.630  4.00  0.00           H  
ATOM   1829  H5'  DA A  57     -22.942 -18.122   3.450  1.00  0.00           H  
ATOM   1830  H61  DA A  57     -14.814 -23.497   3.090  0.00  0.00           H  
ATOM   1831  H62  DA A  57     -16.465 -24.070   3.550  0.00  0.00           H  
ATOM   1832 H2''  DA A  57     -19.106 -18.752   0.280  4.00  0.00           H  
ATOM   1833 H5''  DA A  57     -23.356 -16.973   2.150  2.00  0.00           H  
ATOM   1834  P   DCP A  58     -20.738 -15.457  -0.590  5.00  0.00           P  
ATOM   1835  C5' DCP A  58     -18.675 -16.335  -2.000  4.00  0.00           C  
ATOM   1836  O5' DCP A  58     -20.069 -16.149  -1.740  9.00  0.00           O  
ATOM   1837  C4' DCP A  58     -18.390 -16.783  -3.400  3.00  0.00           C  
ATOM   1838  O4' DCP A  58     -18.934 -18.077  -3.670  8.00  0.00           O  
ATOM   1839  C3' DCP A  58     -18.878 -15.918  -4.500  7.00  0.00           C  
ATOM   1840  O3' DCP A  58     -17.987 -15.886  -5.620  0.00  0.00           O  
ATOM   1841  C2' DCP A  58     -20.135 -16.501  -4.940  3.00  0.00           C  
ATOM   1842  C1' DCP A  58     -20.116 -17.957  -4.490  4.00  0.00           C  
ATOM   1843  N1  DCP A  58     -21.490 -18.356  -3.840  3.00  0.00           N  
ATOM   1844  C2  DCP A  58     -22.619 -18.549  -4.620  5.00  0.00           C  
ATOM   1845  O2  DCP A  58     -22.559 -18.388  -5.820  8.00  0.00           O  
ATOM   1846  N3  DCP A  58     -23.835 -18.880  -4.060  9.00  0.00           N  
ATOM   1847  C4  DCP A  58     -23.938 -19.158  -2.800  9.00  0.00           C  
ATOM   1848  N4  DCP A  58     -25.077 -19.524  -2.340  8.00  0.00           N  
ATOM   1849  C5  DCP A  58     -22.756 -19.038  -1.930  7.00  0.00           C  
ATOM   1850  C6  DCP A  58     -21.580 -18.585  -2.500  7.00  0.00           C  
ATOM   1851  OP1 DCP A  58     -20.117 -14.088  -0.560  8.00  0.00           O  
ATOM   1852  OP2 DCP A  58     -22.171 -15.707  -0.630  5.00  0.00           O  
ATOM   1853  H3  DCP A  58     -24.660 -18.935  -4.690  3.00  0.00           H  
ATOM   1854  H5  DCP A  58     -22.786 -19.239  -0.830  3.00  0.00           H  
ATOM   1855  H6  DCP A  58     -20.687 -18.487  -1.910  5.00  0.00           H  
ATOM   1856  H1' DCP A  58     -19.840 -18.598  -5.370  2.00  0.00           H  
ATOM   1857  H2' DCP A  58     -20.972 -15.955  -4.480  6.00  0.00           H  
ATOM   1858  H3' DCP A  58     -19.057 -14.904  -4.040  1.00  0.00           H  
ATOM   1859  H4' DCP A  58     -17.270 -16.826  -3.460  8.00  0.00           H  
ATOM   1860  H41 DCP A  58     -25.921 -19.687  -2.800  9.00  0.00           H  
ATOM   1861  H5' DCP A  58     -18.361 -17.208  -1.350  0.00  0.00           H  
ATOM   1862  H42 DCP A  58     -25.145 -19.744  -1.380  3.00  0.00           H  
ATOM   1863 H2'' DCP A  58     -20.326 -16.384  -5.980  6.00  0.00           H  
ATOM   1864 H5'' DCP A  58     -18.077 -15.491  -1.750  8.00  0.00           H  
ATOM   1865  P   DCP A  59     -16.747 -14.818  -5.630  6.00  0.00           P  
ATOM   1866  C5' DCP A  59     -18.214 -13.331  -7.240  9.00  0.00           C  
ATOM   1867  O5' DCP A  59     -17.651 -13.483  -5.920  9.00  0.00           O  
ATOM   1868  C4' DCP A  59     -19.395 -12.346  -7.240  9.00  0.00           C  
ATOM   1869  O4' DCP A  59     -20.434 -12.842  -6.380  7.00  0.00           O  
ATOM   1870  C3' DCP A  59     -19.181 -10.938  -6.770  2.00  0.00           C  
ATOM   1871  O3' DCP A  59     -18.973 -10.098  -7.840  7.00  0.00           O  
ATOM   1872  C2' DCP A  59     -20.417 -10.606  -5.960  1.00  0.00           C  
ATOM   1873  C1' DCP A  59     -21.329 -11.835  -6.310  2.00  0.00           C  
ATOM   1874  N1  DCP A  59     -22.416 -12.096  -5.270  2.00  0.00           N  
ATOM   1875  C2  DCP A  59     -23.796 -12.133  -5.690  4.00  0.00           C  
ATOM   1876  O2  DCP A  59     -24.164 -11.963  -6.850  7.00  0.00           O  
ATOM   1877  N3  DCP A  59     -24.696 -12.460  -4.730  9.00  0.00           N  
ATOM   1878  C4  DCP A  59     -24.420 -12.551  -3.440  7.00  0.00           C  
ATOM   1879  N4  DCP A  59     -25.401 -12.618  -2.600  5.00  0.00           N  
ATOM   1880  C5  DCP A  59     -23.092 -12.505  -2.960  3.00  0.00           C  
ATOM   1881  C6  DCP A  59     -22.138 -12.193  -3.880  1.00  0.00           C  
ATOM   1882  OP1 DCP A  59     -15.762 -15.152  -6.710  6.00  0.00           O  
ATOM   1883  OP2 DCP A  59     -16.254 -14.675  -4.300  3.00  0.00           O  
ATOM   1884  H3  DCP A  59     -25.727 -12.479  -5.040  2.00  0.00           H  
ATOM   1885  H5  DCP A  59     -22.835 -12.388  -1.880  6.00  0.00           H  
ATOM   1886  H6  DCP A  59     -21.087 -12.121  -3.490  4.00  0.00           H  
ATOM   1887  H1' DCP A  59     -21.728 -11.748  -7.330  0.00  0.00           H  
ATOM   1888  H2' DCP A  59     -20.216 -10.566  -4.910  6.00  0.00           H  
ATOM   1889  H3' DCP A  59     -18.286 -10.924  -6.160  6.00  0.00           H  
ATOM   1890  H4' DCP A  59     -19.770 -12.161  -8.290  4.00  0.00           H  
ATOM   1891  H41 DCP A  59     -26.419 -12.723  -2.730  7.00  0.00           H  
ATOM   1892  H5' DCP A  59     -18.521 -14.266  -7.600  6.00  0.00           H  
ATOM   1893  H42 DCP A  59     -25.253 -12.776  -1.600  9.00  0.00           H  
ATOM   1894 H2'' DCP A  59     -20.846  -9.632  -6.240  6.00  0.00           H  
ATOM   1895 H5'' DCP A  59     -17.404 -12.894  -7.850  3.00  0.00           H  
ATOM   1896  P   DCP A  60     -18.543  -8.576  -7.730  0.00  0.00           P  
ATOM   1897  C5' DCP A  60     -20.871  -7.911  -8.830  1.00  0.00           C  
ATOM   1898  O5' DCP A  60     -19.861  -7.676  -7.770  4.00  0.00           O  
ATOM   1899  C4' DCP A  60     -21.963  -6.858  -8.890  6.00  0.00           C  
ATOM   1900  O4' DCP A  60     -22.926  -7.119  -7.900  7.00  0.00           O  
ATOM   1901  C3' DCP A  60     -21.604  -5.344  -8.740  7.00  0.00           C  
ATOM   1902  O3' DCP A  60     -21.853  -4.733  -9.940  7.00  0.00           O  
ATOM   1903  C2' DCP A  60     -22.448  -4.838  -7.570  4.00  0.00           C  
ATOM   1904  C1' DCP A  60     -23.587  -5.932  -7.570  5.00  0.00           C  
ATOM   1905  N1  DCP A  60     -24.497  -5.970  -6.400  8.00  0.00           N  
ATOM   1906  C2  DCP A  60     -25.898  -6.054  -6.520  3.00  0.00           C  
ATOM   1907  O2  DCP A  60     -26.378  -6.318  -7.630  3.00  0.00           O  
ATOM   1908  N3  DCP A  60     -26.696  -6.040  -5.400  7.00  0.00           N  
ATOM   1909  C4  DCP A  60     -26.154  -5.891  -4.190  4.00  0.00           C  
ATOM   1910  N4  DCP A  60     -26.856  -6.124  -3.140  1.00  0.00           N  
ATOM   1911  C5  DCP A  60     -24.750  -5.631  -4.030  9.00  0.00           C  
ATOM   1912  C6  DCP A  60     -23.973  -5.727  -5.170  1.00  0.00           C  
ATOM   1913  OP1 DCP A  60     -17.823  -8.256  -8.970  5.00  0.00           O  
ATOM   1914  OP2 DCP A  60     -17.775  -8.388  -6.460  7.00  0.00           O  
ATOM   1915  H3  DCP A  60     -27.729  -6.378  -5.590  3.00  0.00           H  
ATOM   1916  H5  DCP A  60     -24.274  -5.360  -3.100  8.00  0.00           H  
ATOM   1917  H6  DCP A  60     -22.897  -5.452  -5.020  2.00  0.00           H  
ATOM   1918  H1' DCP A  60     -24.158  -5.643  -8.430  3.00  0.00           H  
ATOM   1919  H2' DCP A  60     -21.857  -4.782  -6.680  8.00  0.00           H  
ATOM   1920  H3' DCP A  60     -20.556  -5.346  -8.390  2.00  0.00           H  
ATOM   1921  H4' DCP A  60     -22.478  -6.914  -9.910  6.00  0.00           H  
ATOM   1922  H41 DCP A  60     -27.819  -6.413  -3.300  0.00  0.00           H  
ATOM   1923  H5' DCP A  60     -21.412  -8.847  -8.550  7.00  0.00           H  
ATOM   1924  H42 DCP A  60     -26.450  -6.000  -2.140  8.00  0.00           H  
ATOM   1925 H2'' DCP A  60     -22.935  -3.851  -7.760  5.00  0.00           H  
ATOM   1926 H5'' DCP A  60     -20.355  -7.881  -9.720  8.00  0.00           H  
ATOM   1927  P    DT A  61     -20.997  -3.434 -10.290  7.00  0.00           P  
ATOM   1928  C5'  DT A  61     -21.146  -1.784  -8.140  7.00  0.00           C  
ATOM   1929  O5'  DT A  61     -21.686  -2.249  -9.410  7.00  0.00           O  
ATOM   1930  C4'  DT A  61     -21.967  -0.614  -7.550  5.00  0.00           C  
ATOM   1931  O4'  DT A  61     -22.368   0.222  -8.630  0.00  0.00           O  
ATOM   1932  C3'  DT A  61     -23.214  -1.061  -6.830  3.00  0.00           C  
ATOM   1933  O3'  DT A  61     -23.152  -0.273  -5.620  3.00  0.00           O  
ATOM   1934  C2'  DT A  61     -24.275  -0.619  -7.870  7.00  0.00           C  
ATOM   1935  C1'  DT A  61     -23.677   0.668  -8.430  3.00  0.00           C  
ATOM   1936  N1   DT A  61     -24.308   0.983  -9.810  6.00  0.00           N  
ATOM   1937  C2   DT A  61     -24.938   2.247  -9.960  2.00  0.00           C  
ATOM   1938  O2   DT A  61     -24.941   3.063  -9.060  9.00  0.00           O  
ATOM   1939  N3   DT A  61     -25.622   2.525 -11.080  9.00  0.00           N  
ATOM   1940  C4   DT A  61     -25.445   1.827 -12.250  8.00  0.00           C  
ATOM   1941  O4   DT A  61     -25.821   2.236 -13.300  5.00  0.00           O  
ATOM   1942  C5   DT A  61     -24.827   0.571 -12.090  3.00  0.00           C  
ATOM   1943  C6   DT A  61     -24.206   0.182 -10.950  1.00  0.00           C  
ATOM   1944  C7   DT A  61     -24.699  -0.350 -13.330  2.00  0.00           C  
ATOM   1945  OP1  DT A  61     -21.310  -3.171 -11.720  1.00  0.00           O  
ATOM   1946  OP2  DT A  61     -19.613  -3.606  -9.870  7.00  0.00           O1-
ATOM   1947  H3   DT A  61     -26.133   3.366 -11.110  3.00  0.00           H  
ATOM   1948  H6   DT A  61     -23.547  -0.715 -10.900  1.00  0.00           H  
ATOM   1949  H1'  DT A  61     -23.688   1.421  -7.630  6.00  0.00           H  
ATOM   1950  H2'  DT A  61     -24.351  -1.421  -8.610  1.00  0.00           H  
ATOM   1951  H3'  DT A  61     -23.277  -2.112  -6.680  6.00  0.00           H  
ATOM   1952  H4'  DT A  61     -21.256   0.093  -6.940  6.00  0.00           H  
ATOM   1953  H5'  DT A  61     -20.128  -1.368  -8.370  0.00  0.00           H  
ATOM   1954  H71  DT A  61     -24.084  -1.197 -13.130  0.00  0.00           H  
ATOM   1955  H72  DT A  61     -24.258   0.193 -14.080  8.00  0.00           H  
ATOM   1956  H73  DT A  61     -25.756  -0.613 -13.510  1.00  0.00           H  
ATOM   1957 H2''  DT A  61     -25.288  -0.524  -7.430  0.00  0.00           H  
ATOM   1958 H5''  DT A  61     -21.074  -2.597  -7.330  9.00  0.00           H  
ATOM   1959  P    DA A  62     -24.134  -0.511  -4.360  3.00  0.00           P  
ATOM   1960  C5'  DA A  62     -25.380   1.745  -4.860  2.00  0.00           C  
ATOM   1961  O5'  DA A  62     -25.448   0.303  -4.640  8.00  0.00           O  
ATOM   1962  C4'  DA A  62     -26.650   2.213  -5.490  1.00  0.00           C  
ATOM   1963  O4'  DA A  62     -26.775   1.942  -6.880  6.00  0.00           O  
ATOM   1964  C3'  DA A  62     -27.931   1.686  -4.790  3.00  0.00           C  
ATOM   1965  O3'  DA A  62     -28.775   2.761  -4.440  5.00  0.00           O  
ATOM   1966  C2'  DA A  62     -28.476   0.734  -5.840  5.00  0.00           C  
ATOM   1967  C1'  DA A  62     -28.115   1.556  -7.140  4.00  0.00           C  
ATOM   1968  N1   DA A  62     -29.008   1.779 -12.180  6.00  0.00           N  
ATOM   1969  C2   DA A  62     -28.947   2.711 -11.180  9.00  0.00           C  
ATOM   1970  N3   DA A  62     -28.663   2.561  -9.930  2.00  0.00           N  
ATOM   1971  C4   DA A  62     -28.498   1.249  -9.570  1.00  0.00           C  
ATOM   1972  C5   DA A  62     -28.554   0.169 -10.430  6.00  0.00           C  
ATOM   1973  C6   DA A  62     -28.829   0.506 -11.820  4.00  0.00           C  
ATOM   1974  N6   DA A  62     -28.849  -0.380 -12.830  9.00  0.00           N  
ATOM   1975  N7   DA A  62     -28.231  -0.997  -9.760  7.00  0.00           N  
ATOM   1976  C8   DA A  62     -28.115  -0.619  -8.540  6.00  0.00           C  
ATOM   1977  N9   DA A  62     -28.198   0.746  -8.370  0.00  0.00           N  
ATOM   1978  OP1  DA A  62     -23.539   0.105  -3.200  8.00  0.00           O  
ATOM   1979  OP2  DA A  62     -24.495  -1.941  -4.350  7.00  0.00           O1-
ATOM   1980  H2   DA A  62     -29.111   3.670 -11.540  9.00  0.00           H  
ATOM   1981  H8   DA A  62     -27.910  -1.247  -7.640  6.00  0.00           H  
ATOM   1982  H1'  DA A  62     -28.803   2.365  -7.200  0.00  0.00           H  
ATOM   1983  H2'  DA A  62     -27.913  -0.191  -5.750  4.00  0.00           H  
ATOM   1984  H3'  DA A  62     -27.654   1.124  -3.900  1.00  0.00           H  
ATOM   1985  H4'  DA A  62     -26.601   3.319  -5.460  4.00  0.00           H  
ATOM   1986  H5'  DA A  62     -24.586   2.021  -5.470  0.00  0.00           H  
ATOM   1987  H61  DA A  62     -28.835  -0.149 -13.850  6.00  0.00           H  
ATOM   1988  H62  DA A  62     -28.622  -1.315 -12.520  4.00  0.00           H  
ATOM   1989 H2''  DA A  62     -29.578   0.640  -5.820  6.00  0.00           H  
ATOM   1990 H5''  DA A  62     -25.308   2.208  -3.930  5.00  0.00           H  
ATOM   1991  P    DA A  63     -28.580   3.671  -3.110  4.00  0.00           P  
ATOM   1992  C5'  DA A  63     -29.056   3.193  -0.630  3.00  0.00           C  
ATOM   1993  O5'  DA A  63     -28.770   2.719  -1.890  3.00  0.00           O  
ATOM   1994  C4'  DA A  63     -29.764   2.234   0.340  5.00  0.00           C  
ATOM   1995  O4'  DA A  63     -31.065   1.870  -0.230  7.00  0.00           O  
ATOM   1996  C3'  DA A  63     -28.992   0.953   0.590  8.00  0.00           C  
ATOM   1997  O3'  DA A  63     -29.300   0.350   1.860  6.00  0.00           O  
ATOM   1998  C2'  DA A  63     -29.576   0.046  -0.500  8.00  0.00           C  
ATOM   1999  C1'  DA A  63     -31.034   0.485  -0.590  5.00  0.00           C  
ATOM   2000  N1   DA A  63     -33.711  -2.682  -3.550  0.00  0.00           N  
ATOM   2001  C2   DA A  63     -33.570  -2.704  -2.260  6.00  0.00           C  
ATOM   2002  N3   DA A  63     -32.912  -1.749  -1.580  6.00  0.00           N  
ATOM   2003  C4   DA A  63     -32.268  -0.776  -2.370  4.00  0.00           C  
ATOM   2004  C5   DA A  63     -32.299  -0.699  -3.670  6.00  0.00           C  
ATOM   2005  C6   DA A  63     -32.994  -1.773  -4.260  3.00  0.00           C  
ATOM   2006  N6   DA A  63     -33.107  -2.058  -5.520  2.00  0.00           N  
ATOM   2007  N7   DA A  63     -31.598   0.321  -4.190  2.00  0.00           N  
ATOM   2008  C8   DA A  63     -31.150   0.900  -3.070  9.00  0.00           C  
ATOM   2009  N9   DA A  63     -31.484   0.236  -1.980  6.00  0.00           N  
ATOM   2010  OP1  DA A  63     -29.549   4.751  -3.110  5.00  0.00           O  
ATOM   2011  OP2  DA A  63     -27.142   4.010  -3.170  5.00  0.00           O1-
ATOM   2012  H2   DA A  63     -34.089  -3.474  -1.700  1.00  0.00           H  
ATOM   2013  H8   DA A  63     -30.592   1.804  -2.980  4.00  0.00           H  
ATOM   2014  H1'  DA A  63     -31.532  -0.171   0.110  9.00  0.00           H  
ATOM   2015  H2'  DA A  63     -28.964   0.258  -1.440  8.00  0.00           H  
ATOM   2016  H3'  DA A  63     -27.937   0.937   0.420  8.00  0.00           H  
ATOM   2017  H4'  DA A  63     -29.909   2.693   1.350  3.00  0.00           H  
ATOM   2018  H5'  DA A  63     -29.541   4.173  -0.630  6.00  0.00           H  
ATOM   2019  H61  DA A  63     -33.701  -2.818  -5.750  4.00  0.00           H  
ATOM   2020  H62  DA A  63     -32.666  -1.537  -6.260  1.00  0.00           H  
ATOM   2021 H2''  DA A  63     -29.358  -0.977  -0.320  3.00  0.00           H  
ATOM   2022 H5''  DA A  63     -28.043   3.203  -0.220  3.00  0.00           H  
ATOM   2023  P   DCP A  64     -28.433  -0.929   2.530  2.00  0.00           P  
ATOM   2024  C5' DCP A  64     -30.358  -2.583   1.730  9.00  0.00           C  
ATOM   2025  O5' DCP A  64     -28.973  -2.182   1.720  7.00  0.00           O  
ATOM   2026  C4' DCP A  64     -30.752  -3.727   0.780  6.00  0.00           C  
ATOM   2027  O4' DCP A  64     -30.684  -3.252  -0.470  4.00  0.00           O  
ATOM   2028  C3' DCP A  64     -29.794  -4.884   0.740  9.00  0.00           C  
ATOM   2029  O3' DCP A  64     -30.097  -5.710   1.930  5.00  0.00           O  
ATOM   2030  C2' DCP A  64     -30.204  -5.504  -0.580  9.00  0.00           C  
ATOM   2031  C1' DCP A  64     -30.633  -4.293  -1.430  7.00  0.00           C  
ATOM   2032  N1  DCP A  64     -29.672  -3.847  -2.410  8.00  0.00           N  
ATOM   2033  C2  DCP A  64     -29.958  -3.975  -3.740  8.00  0.00           C  
ATOM   2034  O2  DCP A  64     -31.015  -4.303  -4.210  6.00  0.00           O  
ATOM   2035  N3  DCP A  64     -29.088  -3.577  -4.700  2.00  0.00           N  
ATOM   2036  C4  DCP A  64     -27.941  -3.065  -4.350  0.00  0.00           C  
ATOM   2037  N4  DCP A  64     -27.076  -2.801  -5.280  7.00  0.00           N  
ATOM   2038  C5  DCP A  64     -27.563  -2.874  -2.960  8.00  0.00           C  
ATOM   2039  C6  DCP A  64     -28.455  -3.302  -2.050  3.00  0.00           C  
ATOM   2040  OP1 DCP A  64     -28.846  -1.135   3.970  5.00  0.00           O  
ATOM   2041  OP2 DCP A  64     -26.947  -0.769   2.270  3.00  0.00           O  
ATOM   2042  H3  DCP A  64     -29.303  -3.622  -5.660  5.00  0.00           H  
ATOM   2043  H5  DCP A  64     -26.567  -2.409  -2.660  6.00  0.00           H  
ATOM   2044  H6  DCP A  64     -28.255  -3.235  -0.910  6.00  0.00           H  
ATOM   2045  H1' DCP A  64     -31.666  -4.381  -1.870  0.00  0.00           H  
ATOM   2046  H2' DCP A  64     -29.377  -6.108  -1.050  7.00  0.00           H  
ATOM   2047  H3' DCP A  64     -28.800  -4.430   0.760  6.00  0.00           H  
ATOM   2048  H4' DCP A  64     -31.737  -4.168   0.990  5.00  0.00           H  
ATOM   2049  H41 DCP A  64     -27.263  -3.102  -6.270  9.00  0.00           H  
ATOM   2050  H5' DCP A  64     -30.955  -1.746   1.460  6.00  0.00           H  
ATOM   2051  H42 DCP A  64     -26.181  -2.357  -5.120  7.00  0.00           H  
ATOM   2052 H2'' DCP A  64     -31.020  -6.195  -0.460  3.00  0.00           H  
ATOM   2053 H5'' DCP A  64     -30.607  -2.850   2.750  6.00  0.00           H  
ATOM   2054  P   DCP A  65     -29.044  -6.933   2.270  8.00  0.00           P  
ATOM   2055  C5' DCP A  65     -30.970  -8.565   1.350  6.00  0.00           C  
ATOM   2056  O5' DCP A  65     -29.591  -8.182   1.440  2.00  0.00           O  
ATOM   2057  C4' DCP A  65     -31.125  -9.834   0.500  5.00  0.00           C  
ATOM   2058  O4' DCP A  65     -30.702  -9.406  -0.710  4.00  0.00           O  
ATOM   2059  C3' DCP A  65     -30.455 -11.167   0.860  7.00  0.00           C  
ATOM   2060  O3' DCP A  65     -31.391 -11.910   1.600  7.00  0.00           O  
ATOM   2061  C2' DCP A  65     -30.225 -11.713  -0.540  0.00  0.00           C  
ATOM   2062  C1' DCP A  65     -30.286 -10.560  -1.460  3.00  0.00           C  
ATOM   2063  N1  DCP A  65     -28.876 -10.265  -1.900  2.00  0.00           N  
ATOM   2064  C2  DCP A  65     -28.656 -10.260  -3.280  4.00  0.00           C  
ATOM   2065  O2  DCP A  65     -29.548 -10.480  -4.130  4.00  0.00           O  
ATOM   2066  N3  DCP A  65     -27.479  -9.776  -3.750  8.00  0.00           N  
ATOM   2067  C4  DCP A  65     -26.392  -9.528  -3.010  2.00  0.00           C  
ATOM   2068  N4  DCP A  65     -25.292  -9.350  -3.700  0.00  0.00           N  
ATOM   2069  C5  DCP A  65     -26.594  -9.499  -1.600  6.00  0.00           C  
ATOM   2070  C6  DCP A  65     -27.825  -9.897  -1.070  6.00  0.00           C  
ATOM   2071  OP1 DCP A  65     -29.153  -7.218   3.710  4.00  0.00           O  
ATOM   2072  OP2 DCP A  65     -27.700  -6.631   1.750  5.00  0.00           O  
ATOM   2073  H3  DCP A  65     -27.413  -9.718  -4.730  7.00  0.00           H  
ATOM   2074  H5  DCP A  65     -25.846  -9.034  -0.950  8.00  0.00           H  
ATOM   2075  H6  DCP A  65     -28.011  -9.869   0.000  3.00  0.00           H  
ATOM   2076  H1' DCP A  65     -30.893 -10.808  -2.350  5.00  0.00           H  
ATOM   2077  H2' DCP A  65     -29.289 -12.325  -0.530  1.00  0.00           H  
ATOM   2078  H3' DCP A  65     -29.537 -10.952   1.480  1.00  0.00           H  
ATOM   2079  H4' DCP A  65     -32.209  -9.987   0.410  8.00  0.00           H  
ATOM   2080  H41 DCP A  65     -25.532  -9.285  -4.710  5.00  0.00           H  
ATOM   2081  H5' DCP A  65     -31.517  -7.773   0.800  6.00  0.00           H  
ATOM   2082  H42 DCP A  65     -24.352  -9.357  -3.280  6.00  0.00           H  
ATOM   2083 H2'' DCP A  65     -30.932 -12.517  -0.670  8.00  0.00           H  
ATOM   2084 H5'' DCP A  65     -31.316  -8.655   2.390  3.00  0.00           H  
ATOM   2085  P   DCP A  66     -30.892 -13.175   2.490  9.00  0.00           P  
ATOM   2086  C5' DCP A  66     -31.520 -14.845   0.500  7.00  0.00           C  
ATOM   2087  O5' DCP A  66     -30.464 -14.300   1.330  8.00  0.00           O  
ATOM   2088  C4' DCP A  66     -31.041 -16.072  -0.400  6.00  0.00           C  
ATOM   2089  O4' DCP A  66     -30.000 -15.720  -1.280  5.00  0.00           O  
ATOM   2090  C3' DCP A  66     -30.489 -17.215   0.370  9.00  0.00           C  
ATOM   2091  O3' DCP A  66     -31.258 -18.031   1.180  6.00  0.00           O  
ATOM   2092  C2' DCP A  66     -29.744 -17.906  -0.770  8.00  0.00           C  
ATOM   2093  C1' DCP A  66     -29.512 -16.930  -1.870  6.00  0.00           C  
ATOM   2094  N1  DCP A  66     -28.056 -16.730  -2.180  1.00  0.00           N  
ATOM   2095  C2  DCP A  66     -27.552 -16.639  -3.450  1.00  0.00           C  
ATOM   2096  O2  DCP A  66     -28.276 -16.681  -4.480  3.00  0.00           O  
ATOM   2097  N3  DCP A  66     -26.222 -16.343  -3.630  6.00  0.00           N  
ATOM   2098  C4  DCP A  66     -25.417 -16.187  -2.620  6.00  0.00           C  
ATOM   2099  N4  DCP A  66     -24.195 -15.686  -2.760  7.00  0.00           N  
ATOM   2100  C5  DCP A  66     -25.925 -16.303  -1.230  2.00  0.00           C  
ATOM   2101  C6  DCP A  66     -27.282 -16.564  -1.140  0.00  0.00           C  
ATOM   2102  OP1 DCP A  66     -32.095 -13.634   3.210  1.00  0.00           O  
ATOM   2103  OP2 DCP A  66     -29.670 -12.721   3.210  3.00  0.00           O  
ATOM   2104  H3  DCP A  66     -25.867 -16.311  -4.590  9.00  0.00           H  
ATOM   2105  H5  DCP A  66     -25.449 -16.078  -0.310  6.00  0.00           H  
ATOM   2106  H6  DCP A  66     -27.644 -16.586  -0.090  4.00  0.00           H  
ATOM   2107  H1' DCP A  66     -30.007 -17.153  -2.880  8.00  0.00           H  
ATOM   2108  H2' DCP A  66     -28.810 -18.349  -0.370  4.00  0.00           H  
ATOM   2109  H3' DCP A  66     -29.777 -16.755   1.040  0.00  0.00           H  
ATOM   2110  H4' DCP A  66     -31.890 -16.410  -0.990  6.00  0.00           H  
ATOM   2111  H41 DCP A  66     -23.879 -15.541  -3.720  7.00  0.00           H  
ATOM   2112  H5' DCP A  66     -32.130 -14.117  -0.100  3.00  0.00           H  
ATOM   2113  H42 DCP A  66     -23.522 -15.632  -2.040  3.00  0.00           H  
ATOM   2114 H2'' DCP A  66     -30.409 -18.635  -1.180  8.00  0.00           H  
ATOM   2115 H5'' DCP A  66     -32.188 -15.282   1.230  9.00  0.00           H  
ATOM   2116  P    DT A  67     -32.765 -18.611   0.820  8.00  0.00           P  
ATOM   2117  C5'  DT A  67     -33.311 -18.945  -1.700  2.00  0.00           C  
ATOM   2118  O5'  DT A  67     -32.747 -19.493  -0.540  2.00  0.00           O  
ATOM   2119  C4'  DT A  67     -33.099 -19.942  -2.840  1.00  0.00           C  
ATOM   2120  O4'  DT A  67     -31.718 -20.210  -3.100  6.00  0.00           O  
ATOM   2121  C3'  DT A  67     -33.809 -21.274  -2.740  2.00  0.00           C  
ATOM   2122  O3'  DT A  67     -34.189 -21.694  -4.020  9.00  0.00           O  
ATOM   2123  C2'  DT A  67     -32.726 -22.170  -2.230  2.00  0.00           C  
ATOM   2124  C1'  DT A  67     -31.510 -21.556  -2.910  5.00  0.00           C  
ATOM   2125  N1   DT A  67     -30.263 -21.885  -2.230  1.00  0.00           N  
ATOM   2126  C2   DT A  67     -29.291 -22.450  -2.970  1.00  0.00           C  
ATOM   2127  O2   DT A  67     -29.400 -22.767  -4.180  6.00  0.00           O  
ATOM   2128  N3   DT A  67     -28.034 -22.687  -2.410  5.00  0.00           N  
ATOM   2129  C4   DT A  67     -27.762 -22.436  -1.040  5.00  0.00           C  
ATOM   2130  O4   DT A  67     -26.651 -22.751  -0.670  4.00  0.00           O  
ATOM   2131  C5   DT A  67     -28.835 -21.833  -0.300  5.00  0.00           C  
ATOM   2132  C6   DT A  67     -30.048 -21.643  -0.870  9.00  0.00           C  
ATOM   2133  C7   DT A  67     -28.622 -21.559   1.170  4.00  0.00           C  
ATOM   2134  OP1  DT A  67     -33.677 -17.452   0.530  3.00  0.00           O  
ATOM   2135  OP2  DT A  67     -33.173 -19.479   1.920  2.00  0.00           O1-
ATOM   2136  H3   DT A  67     -27.505 -23.356  -2.940  9.00  0.00           H  
ATOM   2137  H6   DT A  67     -30.880 -21.223  -0.220  9.00  0.00           H  
ATOM   2138  H1'  DT A  67     -31.461 -21.985  -4.000  0.00  0.00           H  
ATOM   2139  H2'  DT A  67     -32.682 -22.225  -1.160  1.00  0.00           H  
ATOM   2140  H3'  DT A  67     -34.699 -21.175  -1.990  1.00  0.00           H  
ATOM   2141  H4'  DT A  67     -33.566 -19.543  -3.710  4.00  0.00           H  
ATOM   2142  H5'  DT A  67     -32.743 -18.030  -2.010  8.00  0.00           H  
ATOM   2143  H71  DT A  67     -28.518 -22.502   1.630  7.00  0.00           H  
ATOM   2144  H72  DT A  67     -29.464 -21.027   1.690  5.00  0.00           H  
ATOM   2145  H73  DT A  67     -27.702 -21.032   1.330  6.00  0.00           H  
ATOM   2146 H2''  DT A  67     -32.813 -23.226  -2.540  1.00  0.00           H  
ATOM   2147 H5''  DT A  67     -34.441 -18.729  -1.650  2.00  0.00           H  
ATOM   2148  P    DA A  68     -35.199 -22.946  -4.190  9.00  0.00           P  
ATOM   2149  C5'  DA A  68     -33.059 -24.181  -5.020  7.00  0.00           C  
ATOM   2150  O5'  DA A  68     -34.191 -24.137  -4.130  6.00  0.00           O  
ATOM   2151  C4'  DA A  68     -31.909 -25.195  -4.870  4.00  0.00           C  
ATOM   2152  O4'  DA A  68     -31.065 -24.923  -3.750  3.00  0.00           O  
ATOM   2153  C3'  DA A  68     -32.451 -26.613  -4.680  0.00  0.00           C  
ATOM   2154  O3'  DA A  68     -31.816 -27.624  -5.450  8.00  0.00           O  
ATOM   2155  C2'  DA A  68     -32.337 -26.919  -3.160  7.00  0.00           C  
ATOM   2156  C1'  DA A  68     -31.073 -26.107  -2.980  0.00  0.00           C  
ATOM   2157  N1   DA A  68     -27.937 -25.767   1.020  5.00  0.00           N  
ATOM   2158  C2   DA A  68     -27.696 -26.242  -0.180  7.00  0.00           C  
ATOM   2159  N3   DA A  68     -28.579 -26.254  -1.210  0.00  0.00           N  
ATOM   2160  C4   DA A  68     -29.825 -25.770  -0.820  1.00  0.00           C  
ATOM   2161  C5   DA A  68     -30.183 -25.388   0.410  2.00  0.00           C  
ATOM   2162  C6   DA A  68     -29.160 -25.388   1.390  4.00  0.00           C  
ATOM   2163  N6   DA A  68     -29.325 -25.146   2.710  7.00  0.00           N  
ATOM   2164  N7   DA A  68     -31.513 -25.091   0.540  4.00  0.00           N  
ATOM   2165  C8   DA A  68     -31.897 -25.193  -0.740  3.00  0.00           C  
ATOM   2166  N9   DA A  68     -30.964 -25.714  -1.540  4.00  0.00           N  
ATOM   2167  OP1  DA A  68     -35.855 -22.806  -5.460  6.00  0.00           O  
ATOM   2168  OP2  DA A  68     -36.030 -23.098  -2.960  7.00  0.00           O1-
ATOM   2169  H2   DA A  68     -26.676 -26.554  -0.360  6.00  0.00           H  
ATOM   2170  H8   DA A  68     -32.920 -25.148  -1.060  9.00  0.00           H  
ATOM   2171  H1'  DA A  68     -30.235 -26.765  -3.180  5.00  0.00           H  
ATOM   2172  H2'  DA A  68     -33.226 -26.563  -2.610  9.00  0.00           H  
ATOM   2173  H3'  DA A  68     -33.507 -26.623  -4.920  3.00  0.00           H  
ATOM   2174  H4'  DA A  68     -31.351 -25.170  -5.740  5.00  0.00           H  
ATOM   2175  H5'  DA A  68     -32.462 -23.297  -4.930  4.00  0.00           H  
ATOM   2176  H61  DA A  68     -28.580 -25.254   3.380  6.00  0.00           H  
ATOM   2177  H62  DA A  68     -30.218 -24.758   3.040  1.00  0.00           H  
ATOM   2178 H2''  DA A  68     -32.138 -27.949  -2.990  9.00  0.00           H  
ATOM   2179 H5''  DA A  68     -33.549 -24.381  -6.050  5.00  0.00           H  
ATOM   2180  P    DA A  69     -32.129 -27.952  -6.990  7.00  0.00           P  
ATOM   2181  C5'  DA A  69     -30.926 -26.149  -8.340  8.00  0.00           C  
ATOM   2182  O5'  DA A  69     -32.117 -26.717  -7.950  9.00  0.00           O  
ATOM   2183  C4'  DA A  69     -30.959 -25.223  -9.580  5.00  0.00           C  
ATOM   2184  O4'  DA A  69     -30.952 -25.945 -10.870  2.00  0.00           O  
ATOM   2185  C3'  DA A  69     -32.128 -24.275  -9.640  3.00  0.00           C  
ATOM   2186  O3'  DA A  69     -31.847 -23.073 -10.400  9.00  0.00           O  
ATOM   2187  C2'  DA A  69     -33.142 -25.109 -10.450  3.00  0.00           C  
ATOM   2188  C1'  DA A  69     -32.283 -25.922 -11.400  6.00  0.00           C  
ATOM   2189  N1   DA A  69     -32.633 -29.835 -14.680  4.00  0.00           N  
ATOM   2190  C2   DA A  69     -32.232 -28.618 -14.870  5.00  0.00           C  
ATOM   2191  N3   DA A  69     -32.230 -27.589 -13.980  9.00  0.00           N  
ATOM   2192  C4   DA A  69     -32.765 -28.034 -12.760  9.00  0.00           C  
ATOM   2193  C5   DA A  69     -33.330 -29.207 -12.490  1.00  0.00           C  
ATOM   2194  C6   DA A  69     -33.283 -30.147 -13.550  6.00  0.00           C  
ATOM   2195  N6   DA A  69     -33.742 -31.369 -13.530  9.00  0.00           N  
ATOM   2196  N7   DA A  69     -33.808 -29.288 -11.170  0.00  0.00           N  
ATOM   2197  C8   DA A  69     -33.412 -28.148 -10.670  1.00  0.00           C  
ATOM   2198  N9   DA A  69     -32.854 -27.302 -11.610  4.00  0.00           N  
ATOM   2199  OP1  DA A  69     -33.539 -28.386  -7.070  2.00  0.00           O  
ATOM   2200  OP2  DA A  69     -31.065 -28.988  -7.300  7.00  0.00           O1-
ATOM   2201  H2   DA A  69     -31.740 -28.344 -15.740  7.00  0.00           H  
ATOM   2202  H8   DA A  69     -33.602 -27.812  -9.580  1.00  0.00           H  
ATOM   2203  H1'  DA A  69     -32.207 -25.334 -12.310  2.00  0.00           H  
ATOM   2204  H2'  DA A  69     -33.709 -25.765  -9.710  6.00  0.00           H  
ATOM   2205  H3'  DA A  69     -32.451 -24.115  -8.610  1.00  0.00           H  
ATOM   2206  H4'  DA A  69     -30.057 -24.518  -9.600  1.00  0.00           H  
ATOM   2207  H5'  DA A  69     -30.172 -26.960  -8.580  5.00  0.00           H  
ATOM   2208  H61  DA A  69     -33.624 -31.972 -14.310  6.00  0.00           H  
ATOM   2209  H62  DA A  69     -34.207 -31.776 -12.720  6.00  0.00           H  
ATOM   2210 H2''  DA A  69     -33.945 -24.509 -10.900  3.00  0.00           H  
ATOM   2211 H5''  DA A  69     -30.456 -25.553  -7.560  1.00  0.00           H  
ATOM   2212  P    DC A  70     -32.508 -21.730  -9.870  6.00  0.00           P  
ATOM   2213  C5'  DC A  70     -32.539 -21.300  -7.320  7.00  0.00           C  
ATOM   2214  O5'  DC A  70     -31.803 -21.338  -8.470  1.00  0.00           O  
ATOM   2215  C4'  DC A  70     -31.892 -20.344  -6.270  3.00  0.00           C  
ATOM   2216  O4'  DC A  70     -30.564 -20.715  -5.990  4.00  0.00           O  
ATOM   2217  C3'  DC A  70     -31.723 -18.893  -6.810  6.00  0.00           C  
ATOM   2218  O3'  DC A  70     -33.045 -18.352  -6.910  5.00  0.00           O  
ATOM   2219  C2'  DC A  70     -30.615 -18.327  -5.920  0.00  0.00           C  
ATOM   2220  C1'  DC A  70     -29.842 -19.667  -5.490  9.00  0.00           C  
ATOM   2221  N1   DC A  70     -28.509 -19.691  -6.120  8.00  0.00           N  
ATOM   2222  C2   DC A  70     -27.396 -19.440  -5.430  1.00  0.00           C  
ATOM   2223  O2   DC A  70     -27.393 -19.324  -4.240  1.00  0.00           O  
ATOM   2224  N3   DC A  70     -26.161 -19.268  -5.950  9.00  0.00           N  
ATOM   2225  C4   DC A  70     -26.030 -19.468  -7.230  6.00  0.00           C  
ATOM   2226  N4   DC A  70     -24.787 -19.384  -7.730  0.00  0.00           N  
ATOM   2227  C5   DC A  70     -27.149 -19.763  -8.110  1.00  0.00           C  
ATOM   2228  C6   DC A  70     -28.398 -19.901  -7.500  1.00  0.00           C  
ATOM   2229  OP1  DC A  70     -33.924 -21.959  -9.690  1.00  0.00           O  
ATOM   2230  OP2  DC A  70     -32.047 -20.651 -10.790  1.00  0.00           O1-
ATOM   2231  H5   DC A  70     -27.023 -19.930  -9.150  6.00  0.00           H  
ATOM   2232  H6   DC A  70     -29.259 -20.039  -8.100  2.00  0.00           H  
ATOM   2233  H1'  DC A  70     -29.663 -19.759  -4.400  1.00  0.00           H  
ATOM   2234  H2'  DC A  70     -29.997 -17.551  -6.310  3.00  0.00           H  
ATOM   2235  H3'  DC A  70     -31.383 -18.892  -7.850  6.00  0.00           H  
ATOM   2236  H4'  DC A  70     -32.483 -20.276  -5.340  6.00  0.00           H  
ATOM   2237  H41  DC A  70     -24.072 -19.357  -7.030  6.00  0.00           H  
ATOM   2238  H5'  DC A  70     -32.783 -22.231  -6.930  9.00  0.00           H  
ATOM   2239  H42  DC A  70     -24.565 -19.583  -8.680  5.00  0.00           H  
ATOM   2240 H2''  DC A  70     -31.174 -18.054  -4.970  0.00  0.00           H  
ATOM   2241 H5''  DC A  70     -33.429 -20.865  -7.470  7.00  0.00           H  
ATOM   2242  P    DC A  71     -33.302 -16.862  -7.340  4.00  0.00           P  
ATOM   2243  C5'  DC A  71     -33.325 -16.049  -4.780  6.00  0.00           C  
ATOM   2244  O5'  DC A  71     -32.873 -15.899  -6.110  4.00  0.00           O  
ATOM   2245  C4'  DC A  71     -32.610 -15.107  -3.760  3.00  0.00           C  
ATOM   2246  O4'  DC A  71     -31.209 -15.189  -3.950  7.00  0.00           O  
ATOM   2247  C3'  DC A  71     -33.060 -13.627  -3.850  3.00  0.00           C  
ATOM   2248  O3'  DC A  71     -33.221 -13.280  -2.440  0.00  0.00           O  
ATOM   2249  C2'  DC A  71     -31.859 -12.891  -4.500  1.00  0.00           C  
ATOM   2250  C1'  DC A  71     -30.750 -13.892  -4.090  2.00  0.00           C  
ATOM   2251  N1   DC A  71     -29.599 -13.854  -5.030  1.00  0.00           N  
ATOM   2252  C2   DC A  71     -28.320 -13.340  -4.700  0.00  0.00           C  
ATOM   2253  O2   DC A  71     -28.026 -13.065  -3.530  8.00  0.00           O  
ATOM   2254  N3   DC A  71     -27.336 -13.087  -5.600  8.00  0.00           N  
ATOM   2255  C4   DC A  71     -27.684 -13.271  -6.860  1.00  0.00           C  
ATOM   2256  N4   DC A  71     -26.796 -12.884  -7.750  7.00  0.00           N  
ATOM   2257  C5   DC A  71     -28.928 -13.819  -7.290  3.00  0.00           C  
ATOM   2258  C6   DC A  71     -29.858 -14.180  -6.330  9.00  0.00           C  
ATOM   2259  OP1  DC A  71     -34.781 -16.774  -7.500  6.00  0.00           O  
ATOM   2260  OP2  DC A  71     -32.479 -16.545  -8.520  8.00  0.00           O1-
ATOM   2261  H5   DC A  71     -29.074 -14.040  -8.360  0.00  0.00           H  
ATOM   2262  H6   DC A  71     -30.817 -14.625  -6.560  3.00  0.00           H  
ATOM   2263  H1'  DC A  71     -30.379 -13.572  -3.060  0.00  0.00           H  
ATOM   2264  H2'  DC A  71     -31.972 -12.882  -5.620  7.00  0.00           H  
ATOM   2265  H3'  DC A  71     -33.917 -13.542  -4.520  6.00  0.00           H  
ATOM   2266  H4'  DC A  71     -32.906 -15.368  -2.720  2.00  0.00           H  
ATOM   2267  H41  DC A  71     -25.884 -12.476  -7.430  2.00  0.00           H  
ATOM   2268  H5'  DC A  71     -33.230 -17.067  -4.520  9.00  0.00           H  
ATOM   2269  H42  DC A  71     -26.959 -12.938  -8.730  5.00  0.00           H  
ATOM   2270 H2''  DC A  71     -31.651 -11.971  -4.050  5.00  0.00           H  
ATOM   2271 H5''  DC A  71     -34.387 -15.837  -4.710  5.00  0.00           H  
ATOM   2272  P    DC A  72     -34.473 -12.538  -1.860  7.00  0.00           P  
ATOM   2273  C5'  DC A  72     -34.551  -9.850  -1.780  6.00  0.00           C  
ATOM   2274  O5'  DC A  72     -33.877 -11.098  -1.700  7.00  0.00           O  
ATOM   2275  C4'  DC A  72     -33.593  -8.690  -1.910  1.00  0.00           C  
ATOM   2276  O4'  DC A  72     -32.675  -8.911  -3.020  4.00  0.00           O  
ATOM   2277  C3'  DC A  72     -34.235  -7.346  -2.100  0.00  0.00           C  
ATOM   2278  O3'  DC A  72     -33.914  -6.427  -1.070  8.00  0.00           O  
ATOM   2279  C2'  DC A  72     -33.404  -6.823  -3.340  4.00  0.00           C  
ATOM   2280  C1'  DC A  72     -32.163  -7.657  -3.280  4.00  0.00           C  
ATOM   2281  N1   DC A  72     -31.469  -7.625  -4.640  1.00  0.00           N  
ATOM   2282  C2   DC A  72     -30.113  -7.298  -4.590  8.00  0.00           C  
ATOM   2283  O2   DC A  72     -29.496  -7.149  -3.520  9.00  0.00           O  
ATOM   2284  N3   DC A  72     -29.372  -7.208  -5.750  0.00  0.00           N  
ATOM   2285  C4   DC A  72     -29.989  -7.478  -6.870  5.00  0.00           C  
ATOM   2286  N4   DC A  72     -29.293  -7.281  -7.960  0.00  0.00           N  
ATOM   2287  C5   DC A  72     -31.312  -7.863  -6.980  3.00  0.00           C  
ATOM   2288  C6   DC A  72     -32.074  -7.895  -5.840  6.00  0.00           C  
ATOM   2289  OP1  DC A  72     -34.779 -13.201  -0.600  6.00  0.00           O  
ATOM   2290  OP2  DC A  72     -35.441 -12.600  -3.000  6.00  0.00           O1-
ATOM   2291  H5   DC A  72     -31.839  -8.073  -7.950  4.00  0.00           H  
ATOM   2292  H6   DC A  72     -33.135  -8.078  -5.970  0.00  0.00           H  
ATOM   2293  H1'  DC A  72     -31.451  -7.434  -2.440  6.00  0.00           H  
ATOM   2294  H2'  DC A  72     -34.026  -6.961  -4.140  9.00  0.00           H  
ATOM   2295  H3'  DC A  72     -35.238  -7.273  -2.420  7.00  0.00           H  
ATOM   2296  H4'  DC A  72     -33.037  -8.565  -0.990  7.00  0.00           H  
ATOM   2297  H41  DC A  72     -28.394  -6.945  -7.800  1.00  0.00           H  
ATOM   2298  H5'  DC A  72     -35.152  -9.741  -0.860  2.00  0.00           H  
ATOM   2299  H42  DC A  72     -29.674  -7.641  -8.850  5.00  0.00           H  
ATOM   2300 H2''  DC A  72     -33.195  -5.766  -3.290  3.00  0.00           H  
ATOM   2301 H5''  DC A  72     -35.181  -9.838  -2.660  2.00  0.00           H  
ATOM   2302  P    DT A  73     -34.878  -6.088   0.100  4.00  0.00           P  
ATOM   2303  C5'  DT A  73     -37.278  -5.117  -0.790  6.00  0.00           C  
ATOM   2304  O5'  DT A  73     -35.957  -4.903  -0.320  9.00  0.00           O  
ATOM   2305  C4'  DT A  73     -38.099  -3.763  -0.650  4.00  0.00           C  
ATOM   2306  O4'  DT A  73     -37.807  -3.213   0.630  7.00  0.00           O  
ATOM   2307  C3'  DT A  73     -37.665  -2.735  -1.660  1.00  0.00           C  
ATOM   2308  O3'  DT A  73     -38.886  -2.101  -2.180  4.00  0.00           O  
ATOM   2309  C2'  DT A  73     -36.689  -1.757  -0.870  7.00  0.00           C  
ATOM   2310  C1'  DT A  73     -37.494  -1.805   0.500  2.00  0.00           C  
ATOM   2311  N1   DT A  73     -36.688  -1.318   1.670  9.00  0.00           N  
ATOM   2312  C2   DT A  73     -37.322  -0.313   2.450  7.00  0.00           C  
ATOM   2313  O2   DT A  73     -38.394   0.249   2.170  7.00  0.00           O  
ATOM   2314  N3   DT A  73     -36.647   0.118   3.610  9.00  0.00           N  
ATOM   2315  C4   DT A  73     -35.387  -0.281   3.960  9.00  0.00           C  
ATOM   2316  O4   DT A  73     -34.893   0.394   4.890  9.00  0.00           O  
ATOM   2317  C5   DT A  73     -34.772  -1.291   3.110  6.00  0.00           C  
ATOM   2318  C6   DT A  73     -35.416  -1.795   1.970  1.00  0.00           C  
ATOM   2319  C7   DT A  73     -33.444  -1.888   3.530  8.00  0.00           C  
ATOM   2320  OP1  DT A  73     -34.076  -5.420   1.100  9.00  0.00           O  
ATOM   2321  OP2  DT A  73     -35.676  -7.292   0.520  6.00  0.00           O1-
ATOM   2322  H3   DT A  73     -37.133   0.808   4.170  9.00  0.00           H  
ATOM   2323  H6   DT A  73     -34.936  -2.566   1.340  0.00  0.00           H  
ATOM   2324  H1'  DT A  73     -38.381  -1.213   0.330  9.00  0.00           H  
ATOM   2325  H2'  DT A  73     -35.676  -2.174  -0.770  4.00  0.00           H  
ATOM   2326  H3'  DT A  73     -37.107  -3.147  -2.490  9.00  0.00           H  
ATOM   2327  H4'  DT A  73     -39.169  -4.113  -0.650  1.00  0.00           H  
ATOM   2328  H5'  DT A  73     -37.682  -5.842  -0.080  3.00  0.00           H  
ATOM   2329  H71  DT A  73     -33.538  -2.129   4.580  9.00  0.00           H  
ATOM   2330  H72  DT A  73     -33.106  -2.719   2.910  0.00  0.00           H  
ATOM   2331  H73  DT A  73     -32.689  -1.200   3.440  6.00  0.00           H  
ATOM   2332 H2''  DT A  73     -36.655  -0.740  -1.260  9.00  0.00           H  
ATOM   2333 H5''  DT A  73     -37.268  -5.524  -1.780  5.00  0.00           H  
ATOM   2334  P    DA A  74     -39.646  -2.496  -3.490  9.00  0.00           P  
ATOM   2335  C5'  DA A  74     -39.114  -2.445  -6.010  9.00  0.00           C  
ATOM   2336  O5'  DA A  74     -38.745  -2.169  -4.680  3.00  0.00           O  
ATOM   2337  C4'  DA A  74     -38.199  -1.645  -7.000  2.00  0.00           C  
ATOM   2338  O4'  DA A  74     -38.038  -0.302  -6.600  0.00  0.00           O  
ATOM   2339  C3'  DA A  74     -36.839  -2.259  -7.100  6.00  0.00           C  
ATOM   2340  O3'  DA A  74     -36.883  -3.291  -8.050  4.00  0.00           O  
ATOM   2341  C2'  DA A  74     -36.011  -1.098  -7.560  1.00  0.00           C  
ATOM   2342  C1'  DA A  74     -36.658   0.020  -6.800  4.00  0.00           C  
ATOM   2343  N1   DA A  74     -34.042   3.808  -4.390  7.00  0.00           N  
ATOM   2344  C2   DA A  74     -34.448   3.646  -5.710  3.00  0.00           C  
ATOM   2345  N3   DA A  74     -35.078   2.571  -6.240  0.00  0.00           N  
ATOM   2346  C4   DA A  74     -35.271   1.582  -5.260  3.00  0.00           C  
ATOM   2347  C5   DA A  74     -35.029   1.656  -3.910  8.00  0.00           C  
ATOM   2348  C6   DA A  74     -34.417   2.839  -3.550  1.00  0.00           C  
ATOM   2349  N6   DA A  74     -33.875   3.141  -2.380  1.00  0.00           N  
ATOM   2350  N7   DA A  74     -35.433   0.468  -3.330  5.00  0.00           N  
ATOM   2351  C8   DA A  74     -35.958  -0.242  -4.290  4.00  0.00           C  
ATOM   2352  N9   DA A  74     -35.956   0.381  -5.490  4.00  0.00           N  
ATOM   2353  OP1  DA A  74     -40.780  -1.571  -3.600  5.00  0.00           O  
ATOM   2354  OP2  DA A  74     -39.911  -3.939  -3.450  0.00  0.00           O1-
ATOM   2355  H2   DA A  74     -34.179   4.434  -6.390  1.00  0.00           H  
ATOM   2356  H8   DA A  74     -36.478  -1.166  -4.140  5.00  0.00           H  
ATOM   2357  H1'  DA A  74     -36.657   0.933  -7.350  6.00  0.00           H  
ATOM   2358  H2'  DA A  74     -34.993  -1.288  -7.290  2.00  0.00           H  
ATOM   2359  H3'  DA A  74     -36.610  -2.590  -6.100  0.00  0.00           H  
ATOM   2360  H4'  DA A  74     -38.715  -1.677  -7.990  7.00  0.00           H  
ATOM   2361  H5'  DA A  74     -40.171  -2.006  -6.140  2.00  0.00           H  
ATOM   2362  H61  DA A  74     -33.262   3.917  -2.260  1.00  0.00           H  
ATOM   2363  H62  DA A  74     -33.840   2.402  -1.710  6.00  0.00           H  
ATOM   2364 H2''  DA A  74     -36.011  -1.010  -8.650  5.00  0.00           H  
ATOM   2365 H5''  DA A  74     -39.125  -3.505  -6.210  8.00  0.00           H  
ATOM   2366  P    DA A  75     -35.619  -4.078  -8.500  2.00  0.00           P  
ATOM   2367  C5'  DA A  75     -35.505  -2.969 -10.890  3.00  0.00           C  
ATOM   2368  O5'  DA A  75     -34.874  -3.352  -9.720  0.00  0.00           O  
ATOM   2369  C4'  DA A  75     -34.662  -2.258 -11.920  5.00  0.00           C  
ATOM   2370  O4'  DA A  75     -34.311  -1.005 -11.380  6.00  0.00           O  
ATOM   2371  C3'  DA A  75     -33.428  -3.071 -12.290  0.00  0.00           C  
ATOM   2372  O3'  DA A  75     -32.901  -2.947 -13.630  6.00  0.00           O  
ATOM   2373  C2'  DA A  75     -32.444  -2.395 -11.360  1.00  0.00           C  
ATOM   2374  C1'  DA A  75     -32.914  -0.954 -11.210  2.00  0.00           C  
ATOM   2375  N1   DA A  75     -31.756   3.315  -8.600  0.00  0.00           N  
ATOM   2376  C2   DA A  75     -32.133   3.080  -9.830  8.00  0.00           C  
ATOM   2377  N3   DA A  75     -32.521   1.977 -10.400  3.00  0.00           N  
ATOM   2378  C4   DA A  75     -32.512   0.925  -9.540  2.00  0.00           C  
ATOM   2379  C5   DA A  75     -32.090   0.953  -8.230  2.00  0.00           C  
ATOM   2380  C6   DA A  75     -31.786   2.221  -7.790  5.00  0.00           C  
ATOM   2381  N6   DA A  75     -31.495   2.494  -6.530  0.00  0.00           N  
ATOM   2382  N7   DA A  75     -32.156  -0.318  -7.620  3.00  0.00           N  
ATOM   2383  C8   DA A  75     -32.565  -0.995  -8.670  7.00  0.00           C  
ATOM   2384  N9   DA A  75     -32.661  -0.353  -9.880  7.00  0.00           N  
ATOM   2385  OP1  DA A  75     -35.983  -5.387  -9.090  7.00  0.00           O  
ATOM   2386  OP2  DA A  75     -34.751  -4.122  -7.330  7.00  0.00           O1-
ATOM   2387  H2   DA A  75     -32.260   4.052 -10.410  0.00  0.00           H  
ATOM   2388  H8   DA A  75     -32.804  -2.030  -8.600  3.00  0.00           H  
ATOM   2389  H1'  DA A  75     -32.487  -0.279 -12.040  2.00  0.00           H  
ATOM   2390  H2'  DA A  75     -32.465  -2.954 -10.410  8.00  0.00           H  
ATOM   2391  H3'  DA A  75     -33.443  -4.172 -12.060  0.00  0.00           H  
ATOM   2392  H4'  DA A  75     -35.217  -2.182 -12.860  9.00  0.00           H  
ATOM   2393  H5'  DA A  75     -36.273  -2.345 -10.580  2.00  0.00           H  
ATOM   2394  H61  DA A  75     -31.287   3.394  -6.350  9.00  0.00           H  
ATOM   2395  H62  DA A  75     -31.583   1.787  -5.850  1.00  0.00           H  
ATOM   2396 H2''  DA A  75     -31.411  -2.438 -11.710  3.00  0.00           H  
ATOM   2397 H5''  DA A  75     -36.010  -3.850 -11.360  4.00  0.00           H  
ATOM   2398  P    DC A  76     -32.275  -4.226 -14.480  8.00  0.00           P  
ATOM   2399  C5'  DC A  76     -29.615  -4.061 -14.000  0.00  0.00           C  
ATOM   2400  O5'  DC A  76     -30.933  -4.552 -13.670  5.00  0.00           O  
ATOM   2401  C4'  DC A  76     -28.582  -4.341 -12.880  0.00  0.00           C  
ATOM   2402  O4'  DC A  76     -28.915  -3.606 -11.670  5.00  0.00           O  
ATOM   2403  C3'  DC A  76     -28.480  -5.821 -12.460  2.00  0.00           C  
ATOM   2404  O3'  DC A  76     -27.662  -6.597 -13.320  1.00  0.00           O  
ATOM   2405  C2'  DC A  76     -27.788  -5.631 -11.040  6.00  0.00           C  
ATOM   2406  C1'  DC A  76     -28.363  -4.280 -10.590  1.00  0.00           C  
ATOM   2407  N1   DC A  76     -29.505  -4.383  -9.590  1.00  0.00           N  
ATOM   2408  C2   DC A  76     -29.243  -4.063  -8.260  8.00  0.00           C  
ATOM   2409  O2   DC A  76     -28.111  -3.675  -7.840  1.00  0.00           O  
ATOM   2410  N3   DC A  76     -30.131  -4.077  -7.320  0.00  0.00           N  
ATOM   2411  C4   DC A  76     -31.325  -4.516  -7.620  3.00  0.00           C  
ATOM   2412  N4   DC A  76     -32.175  -4.708  -6.690  7.00  0.00           N  
ATOM   2413  C5   DC A  76     -31.641  -4.985  -8.930  7.00  0.00           C  
ATOM   2414  C6   DC A  76     -30.723  -4.932  -9.940  2.00  0.00           C  
ATOM   2415  OP1  DC A  76     -31.868  -3.661 -15.800  1.00  0.00           O  
ATOM   2416  OP2  DC A  76     -33.189  -5.414 -14.440  6.00  0.00           O1-
ATOM   2417  H5   DC A  76     -32.574  -5.462  -9.180  1.00  0.00           H  
ATOM   2418  H6   DC A  76     -31.074  -5.311 -10.950  4.00  0.00           H  
ATOM   2419  H1'  DC A  76     -27.500  -3.672 -10.220  0.00  0.00           H  
ATOM   2420  H2'  DC A  76     -27.934  -6.543 -10.390  3.00  0.00           H  
ATOM   2421  H3'  DC A  76     -29.433  -6.396 -12.330  6.00  0.00           H  
ATOM   2422  H4'  DC A  76     -27.551  -4.076 -13.110  5.00  0.00           H  
ATOM   2423  H41  DC A  76     -31.998  -4.374  -5.720  4.00  0.00           H  
ATOM   2424  H5'  DC A  76     -29.594  -2.926 -13.970  8.00  0.00           H  
ATOM   2425  H42  DC A  76     -33.172  -4.862  -7.000  2.00  0.00           H  
ATOM   2426 H2''  DC A  76     -26.739  -5.481 -11.190  4.00  0.00           H  
ATOM   2427 H5''  DC A  76     -29.253  -4.532 -14.890  9.00  0.00           H  
ATOM   2428  P    DC A  77     -27.785  -8.141 -13.490  7.00  0.00           P  
ATOM   2429  C5'  DC A  77     -25.381  -8.647 -12.670  9.00  0.00           C  
ATOM   2430  O5'  DC A  77     -26.814  -8.836 -12.520  0.00  0.00           O  
ATOM   2431  C4'  DC A  77     -24.534  -9.041 -11.460  4.00  0.00           C  
ATOM   2432  O4'  DC A  77     -24.935  -8.390 -10.270  1.00  0.00           O  
ATOM   2433  C3'  DC A  77     -24.560 -10.536 -11.340  8.00  0.00           C  
ATOM   2434  O3'  DC A  77     -23.703 -11.220 -12.210  9.00  0.00           O  
ATOM   2435  C2'  DC A  77     -24.324 -10.683  -9.780  2.00  0.00           C  
ATOM   2436  C1'  DC A  77     -24.952  -9.307  -9.240  0.00  0.00           C  
ATOM   2437  N1   DC A  77     -26.335  -9.540  -8.650  2.00  0.00           N  
ATOM   2438  C2   DC A  77     -26.587  -9.491  -7.250  4.00  0.00           C  
ATOM   2439  O2   DC A  77     -25.729  -9.111  -6.460  7.00  0.00           O  
ATOM   2440  N3   DC A  77     -27.677  -9.881  -6.680  7.00  0.00           N  
ATOM   2441  C4   DC A  77     -28.639 -10.222  -7.470  5.00  0.00           C  
ATOM   2442  N4   DC A  77     -29.704 -10.695  -6.860  8.00  0.00           N  
ATOM   2443  C5   DC A  77     -28.556 -10.266  -8.850  0.00  0.00           C  
ATOM   2444  C6   DC A  77     -27.380  -9.866  -9.430  1.00  0.00           C  
ATOM   2445  OP1  DC A  77     -27.293  -8.400 -14.820  3.00  0.00           O  
ATOM   2446  OP2  DC A  77     -29.115  -8.606 -13.040  2.00  0.00           O1-
ATOM   2447  H5   DC A  77     -29.377 -10.525  -9.500  9.00  0.00           H  
ATOM   2448  H6   DC A  77     -27.320  -9.853 -10.520  0.00  0.00           H  
ATOM   2449  H1'  DC A  77     -24.405  -8.900  -8.500  7.00  0.00           H  
ATOM   2450  H2'  DC A  77     -24.791 -11.570  -9.330  7.00  0.00           H  
ATOM   2451  H3'  DC A  77     -25.566 -10.833 -11.560  2.00  0.00           H  
ATOM   2452  H4'  DC A  77     -23.507  -8.751 -11.720  9.00  0.00           H  
ATOM   2453  H41  DC A  77     -29.834 -10.725  -5.890  2.00  0.00           H  
ATOM   2454  H5'  DC A  77     -25.266  -7.546 -12.820  9.00  0.00           H  
ATOM   2455  H42  DC A  77     -30.464 -11.206  -7.380  6.00  0.00           H  
ATOM   2456 H2''  DC A  77     -23.208 -10.659  -9.630  1.00  0.00           H  
ATOM   2457 H5''  DC A  77     -25.028  -9.187 -13.550  9.00  0.00           H  
ATOM   2458  P    DC A  78     -23.836 -12.782 -12.480  5.00  0.00           P  
ATOM   2459  C5'  DC A  78     -21.771 -13.134 -10.900  2.00  0.00           C  
ATOM   2460  O5'  DC A  78     -23.149 -13.389 -11.210  1.00  0.00           O  
ATOM   2461  C4'  DC A  78     -21.334 -14.075  -9.790  6.00  0.00           C  
ATOM   2462  O4'  DC A  78     -22.111 -13.845  -8.590  2.00  0.00           O  
ATOM   2463  C3'  DC A  78     -21.453 -15.572 -10.150  0.00  0.00           C  
ATOM   2464  O3'  DC A  78     -20.242 -15.870 -10.760  9.00  0.00           O  
ATOM   2465  C2'  DC A  78     -21.492 -16.068  -8.740  7.00  0.00           C  
ATOM   2466  C1'  DC A  78     -22.263 -15.059  -7.880  9.00  0.00           C  
ATOM   2467  N1   DC A  78     -23.654 -15.370  -7.750  3.00  0.00           N  
ATOM   2468  C2   DC A  78     -24.190 -15.432  -6.460  6.00  0.00           C  
ATOM   2469  O2   DC A  78     -23.570 -15.253  -5.410  6.00  0.00           O  
ATOM   2470  N3   DC A  78     -25.502 -15.709  -6.250  6.00  0.00           N  
ATOM   2471  C4   DC A  78     -26.247 -16.011  -7.300  7.00  0.00           C  
ATOM   2472  N4   DC A  78     -27.391 -16.559  -7.080  1.00  0.00           N  
ATOM   2473  C5   DC A  78     -25.817 -15.871  -8.610  7.00  0.00           C  
ATOM   2474  C6   DC A  78     -24.518 -15.519  -8.820  9.00  0.00           C  
ATOM   2475  OP1  DC A  78     -23.036 -13.170 -13.690  3.00  0.00           O  
ATOM   2476  OP2  DC A  78     -25.234 -13.297 -12.510  8.00  0.00           O1-
ATOM   2477  H5   DC A  78     -26.410 -15.937  -9.470  3.00  0.00           H  
ATOM   2478  H6   DC A  78     -24.086 -15.434  -9.840  5.00  0.00           H  
ATOM   2479  H1'  DC A  78     -21.785 -14.956  -6.920  1.00  0.00           H  
ATOM   2480  H2'  DC A  78     -21.825 -17.141  -8.760  9.00  0.00           H  
ATOM   2481  H3'  DC A  78     -22.383 -15.818 -10.710  3.00  0.00           H  
ATOM   2482  H4'  DC A  78     -20.269 -13.868  -9.570  7.00  0.00           H  
ATOM   2483  H41  DC A  78     -27.702 -16.652  -6.180  7.00  0.00           H  
ATOM   2484  H5'  DC A  78     -21.650 -12.126 -10.470  3.00  0.00           H  
ATOM   2485  H42  DC A  78     -27.980 -16.709  -7.850  7.00  0.00           H  
ATOM   2486 H2''  DC A  78     -20.456 -16.049  -8.360  6.00  0.00           H  
ATOM   2487 H5''  DC A  78     -21.184 -13.154 -11.830  4.00  0.00           H  
ATOM   2488  P    DT A  79     -20.208 -16.952 -11.910  6.00  0.00           P  
ATOM   2489  C5'  DT A  79     -18.560 -19.025 -11.580  2.00  0.00           C  
ATOM   2490  O5'  DT A  79     -18.737 -17.592 -11.740  3.00  0.00           O  
ATOM   2491  C4'  DT A  79     -17.329 -19.323 -10.700  1.00  0.00           C  
ATOM   2492  O4'  DT A  79     -17.063 -20.705 -10.570  5.00  0.00           O  
ATOM   2493  C3'  DT A  79     -16.023 -18.679 -11.140  7.00  0.00           C  
ATOM   2494  O3'  DT A  79     -15.266 -18.192 -10.070  9.00  0.00           O  
ATOM   2495  C2'  DT A  79     -15.401 -19.861 -11.820  8.00  0.00           C  
ATOM   2496  C1'  DT A  79     -15.697 -20.980 -10.770  2.00  0.00           C  
ATOM   2497  N1   DT A  79     -15.309 -22.295 -11.290  4.00  0.00           N  
ATOM   2498  C2   DT A  79     -14.403 -23.046 -10.650  3.00  0.00           C  
ATOM   2499  O2   DT A  79     -14.000 -22.753  -9.530  4.00  0.00           O  
ATOM   2500  N3   DT A  79     -14.004 -24.215 -11.220  6.00  0.00           N  
ATOM   2501  C4   DT A  79     -14.437 -24.766 -12.380  3.00  0.00           C  
ATOM   2502  O4   DT A  79     -13.946 -25.713 -12.830  0.00  0.00           O  
ATOM   2503  C5   DT A  79     -15.440 -23.933 -13.060  9.00  0.00           C  
ATOM   2504  C6   DT A  79     -15.804 -22.710 -12.520  5.00  0.00           C  
ATOM   2505  C7   DT A  79     -15.949 -24.404 -14.400  0.00  0.00           C  
ATOM   2506  OP1  DT A  79     -21.205 -18.055 -11.670  8.00  0.00           O  
ATOM   2507  OP2  DT A  79     -20.153 -16.320 -13.250  2.00  0.00           O1-
ATOM   2508  H3   DT A  79     -13.320 -24.697 -10.730  2.00  0.00           H  
ATOM   2509  H6   DT A  79     -16.545 -22.092 -12.990  5.00  0.00           H  
ATOM   2510  H1'  DT A  79     -15.220 -20.649  -9.860  7.00  0.00           H  
ATOM   2511  H2'  DT A  79     -15.789 -20.041 -12.880  7.00  0.00           H  
ATOM   2512  H3'  DT A  79     -16.225 -17.806 -11.870  3.00  0.00           H  
ATOM   2513  H4'  DT A  79     -17.533 -18.880  -9.780  7.00  0.00           H  
ATOM   2514  H5'  DT A  79     -18.513 -19.530 -12.510  6.00  0.00           H  
ATOM   2515  H71  DT A  79     -16.474 -25.350 -14.270  0.00  0.00           H  
ATOM   2516  H72  DT A  79     -16.507 -23.562 -14.790  0.00  0.00           H  
ATOM   2517  H73  DT A  79     -15.116 -24.512 -15.080  9.00  0.00           H  
ATOM   2518 H2''  DT A  79     -14.355 -19.686 -11.820  6.00  0.00           H  
ATOM   2519 H5''  DT A  79     -19.412 -19.522 -11.020  9.00  0.00           H  
ATOM   2520  P    DA A  80     -13.936 -17.326 -10.350  9.00  0.00           P  
ATOM   2521  C5'  DA A  80     -12.090 -19.006  -9.580  9.00  0.00           C  
ATOM   2522  O5'  DA A  80     -12.796 -18.314 -10.600  5.00  0.00           O  
ATOM   2523  C4'  DA A  80     -11.151 -20.143 -10.110  5.00  0.00           C  
ATOM   2524  O4'  DA A  80     -11.916 -21.144 -10.860  5.00  0.00           O  
ATOM   2525  C3'  DA A  80     -10.017 -19.656 -10.830  8.00  0.00           C  
ATOM   2526  O3'  DA A  80      -8.924 -19.414  -9.940  2.00  0.00           O  
ATOM   2527  C2'  DA A  80      -9.815 -20.860 -11.670  8.00  0.00           C  
ATOM   2528  C1'  DA A  80     -11.158 -21.395 -11.990  4.00  0.00           C  
ATOM   2529  N1   DA A  80     -13.607 -22.688 -16.250  3.00  0.00           N  
ATOM   2530  C2   DA A  80     -12.830 -23.377 -15.440  8.00  0.00           C  
ATOM   2531  N3   DA A  80     -12.223 -22.915 -14.350  3.00  0.00           N  
ATOM   2532  C4   DA A  80     -12.322 -21.522 -14.170  3.00  0.00           C  
ATOM   2533  C5   DA A  80     -12.980 -20.673 -14.980  1.00  0.00           C  
ATOM   2534  C6   DA A  80     -13.634 -21.356 -16.020  4.00  0.00           C  
ATOM   2535  N6   DA A  80     -14.356 -20.779 -16.950  5.00  0.00           N  
ATOM   2536  N7   DA A  80     -13.010 -19.427 -14.410  5.00  0.00           N  
ATOM   2537  C8   DA A  80     -12.139 -19.489 -13.380  3.00  0.00           C  
ATOM   2538  N9   DA A  80     -11.801 -20.820 -13.140  6.00  0.00           N  
ATOM   2539  OP1  DA A  80     -13.693 -16.530  -9.130  0.00  0.00           O  
ATOM   2540  OP2  DA A  80     -14.259 -16.640 -11.620  0.00  0.00           O1-
ATOM   2541  H2   DA A  80     -12.640 -24.487 -15.680  7.00  0.00           H  
ATOM   2542  H8   DA A  80     -11.934 -18.639 -12.730  2.00  0.00           H  
ATOM   2543  H1'  DA A  80     -11.084 -22.447 -12.040  3.00  0.00           H  
ATOM   2544  H2'  DA A  80      -9.199 -20.813 -12.560  4.00  0.00           H  
ATOM   2545  H3'  DA A  80     -10.347 -18.755 -11.360  9.00  0.00           H  
ATOM   2546  H4'  DA A  80     -10.822 -20.611  -9.170  4.00  0.00           H  
ATOM   2547  H5'  DA A  80     -12.880 -19.480  -8.900  5.00  0.00           H  
ATOM   2548  H61  DA A  80     -14.540 -21.257 -17.790  0.00  0.00           H  
ATOM   2549  H62  DA A  80     -14.221 -19.815 -17.040  9.00  0.00           H  
ATOM   2550 H2''  DA A  80      -9.406 -21.596 -10.900  7.00  0.00           H  
ATOM   2551 H5''  DA A  80     -11.557 -18.160  -9.110  9.00  0.00           H  
ATOM   2552  P    DA A  81      -7.556 -18.776 -10.270  6.00  0.00           P  
ATOM   2553  C5'  DA A  81      -6.415 -21.089 -11.070  4.00  0.00           C  
ATOM   2554  O5'  DA A  81      -6.882 -19.770 -11.350  8.00  0.00           O  
ATOM   2555  C4'  DA A  81      -6.154 -21.962 -12.300  9.00  0.00           C  
ATOM   2556  O4'  DA A  81      -7.267 -22.049 -13.210  5.00  0.00           O  
ATOM   2557  C3'  DA A  81      -4.868 -21.577 -13.080  0.00  0.00           C  
ATOM   2558  O3'  DA A  81      -4.300 -22.787 -13.630  8.00  0.00           O  
ATOM   2559  C2'  DA A  81      -5.524 -20.671 -14.070  3.00  0.00           C  
ATOM   2560  C1'  DA A  81      -6.870 -21.351 -14.390  5.00  0.00           C  
ATOM   2561  N1   DA A  81     -10.766 -20.400 -17.500  0.00  0.00           N  
ATOM   2562  C2   DA A  81     -10.005 -21.436 -17.420  5.00  0.00           C  
ATOM   2563  N3   DA A  81      -8.977 -21.611 -16.600  0.00  0.00           N  
ATOM   2564  C4   DA A  81      -8.827 -20.541 -15.780  1.00  0.00           C  
ATOM   2565  C5   DA A  81      -9.628 -19.413 -15.700  9.00  0.00           C  
ATOM   2566  C6   DA A  81     -10.585 -19.350 -16.740  5.00  0.00           C  
ATOM   2567  N6   DA A  81     -11.416 -18.352 -17.080  9.00  0.00           N  
ATOM   2568  N7   DA A  81      -9.286 -18.470 -14.620  9.00  0.00           N  
ATOM   2569  C8   DA A  81      -8.238 -19.097 -14.150  4.00  0.00           C  
ATOM   2570  N9   DA A  81      -7.913 -20.328 -14.790  0.00  0.00           N  
ATOM   2571  OP1  DA A  81      -6.794 -18.698  -9.060  8.00  0.00           O  
ATOM   2572  OP2  DA A  81      -7.885 -17.500 -10.870  5.00  0.00           O1-
ATOM   2573  H2   DA A  81     -10.250 -22.291 -18.070  4.00  0.00           H  
ATOM   2574  H8   DA A  81      -7.696 -18.710 -13.310  6.00  0.00           H  
ATOM   2575  H1'  DA A  81      -6.664 -22.064 -15.130  4.00  0.00           H  
ATOM   2576  H2'  DA A  81      -5.691 -19.727 -13.550  3.00  0.00           H  
ATOM   2577  H3'  DA A  81      -4.197 -20.971 -12.460  4.00  0.00           H  
ATOM   2578  H4'  DA A  81      -6.068 -22.953 -11.930  9.00  0.00           H  
ATOM   2579  H5'  DA A  81      -7.160 -21.585 -10.510  4.00  0.00           H  
ATOM   2580  H61  DA A  81     -11.931 -18.470 -17.960  9.00  0.00           H  
ATOM   2581  H62  DA A  81     -11.315 -17.536 -16.540  2.00  0.00           H  
ATOM   2582 H2''  DA A  81      -4.894 -20.652 -14.960  7.00  0.00           H  
ATOM   2583 H5''  DA A  81      -5.560 -21.194 -10.280  2.00  0.00           H  
ATOM   2584  P    DC A  82      -2.814 -22.832 -14.240  9.00  0.00           P  
ATOM   2585  C5'  DC A  82      -3.434 -23.358 -16.790  0.00  0.00           C  
ATOM   2586  O5'  DC A  82      -3.237 -22.368 -15.800  6.00  0.00           O  
ATOM   2587  C4'  DC A  82      -3.852 -22.843 -18.150  5.00  0.00           C  
ATOM   2588  O4'  DC A  82      -4.977 -22.043 -17.950  6.00  0.00           O  
ATOM   2589  C3'  DC A  82      -2.772 -22.010 -18.800  5.00  0.00           C  
ATOM   2590  O3'  DC A  82      -2.854 -22.158 -20.270  8.00  0.00           O  
ATOM   2591  C2'  DC A  82      -3.185 -20.613 -18.390  4.00  0.00           C  
ATOM   2592  C1'  DC A  82      -4.699 -20.770 -18.630  0.00  0.00           C  
ATOM   2593  N1   DC A  82      -5.609 -19.611 -18.200  8.00  0.00           N  
ATOM   2594  C2   DC A  82      -6.762 -19.400 -18.960  4.00  0.00           C  
ATOM   2595  O2   DC A  82      -7.034 -20.088 -19.940  7.00  0.00           O  
ATOM   2596  N3   DC A  82      -7.622 -18.408 -18.540  4.00  0.00           N  
ATOM   2597  C4   DC A  82      -7.335 -17.722 -17.470  2.00  0.00           C  
ATOM   2598  N4   DC A  82      -8.271 -16.933 -17.080  1.00  0.00           N  
ATOM   2599  C5   DC A  82      -6.173 -17.913 -16.620  2.00  0.00           C  
ATOM   2600  C6   DC A  82      -5.251 -18.824 -17.070  9.00  0.00           C  
ATOM   2601  OP1  DC A  82      -2.321 -24.228 -14.400  4.00  0.00           O  
ATOM   2602  OP2  DC A  82      -1.946 -21.841 -13.600  9.00  0.00           O1-
ATOM   2603  H5   DC A  82      -6.125 -17.375 -15.670  8.00  0.00           H  
ATOM   2604  H6   DC A  82      -4.305 -18.985 -16.640  2.00  0.00           H  
ATOM   2605  H1'  DC A  82      -4.774 -20.834 -19.640  2.00  0.00           H  
ATOM   2606  H2'  DC A  82      -2.853 -20.394 -17.360  3.00  0.00           H  
ATOM   2607  H3'  DC A  82      -1.775 -22.258 -18.380  9.00  0.00           H  
ATOM   2608  H4'  DC A  82      -4.162 -23.619 -18.820  5.00  0.00           H  
ATOM   2609  H41  DC A  82      -9.084 -16.822 -17.630  0.00  0.00           H  
ATOM   2610  H5'  DC A  82      -4.222 -24.026 -16.390  6.00  0.00           H  
ATOM   2611  H42  DC A  82      -8.022 -16.178 -16.410  2.00  0.00           H  
ATOM   2612 H2''  DC A  82      -2.788 -19.954 -19.010  3.00  0.00           H  
ATOM   2613 H5''  DC A  82      -2.493 -24.034 -16.820  6.00  0.00           H  
ATOM   2614  P    DC A  83      -1.736 -21.709 -21.320  5.00  0.00           P  
ATOM   2615  C5'  DC A  83      -3.279 -21.486 -23.440  7.00  0.00           C  
ATOM   2616  O5'  DC A  83      -2.620 -20.883 -22.380  6.00  0.00           O  
ATOM   2617  C4'  DC A  83      -3.950 -20.673 -24.520  4.00  0.00           C  
ATOM   2618  O4'  DC A  83      -5.032 -19.928 -23.900  8.00  0.00           O  
ATOM   2619  C3'  DC A  83      -3.001 -19.627 -25.210  7.00  0.00           C  
ATOM   2620  O3'  DC A  83      -3.403 -19.501 -26.560  3.00  0.00           O  
ATOM   2621  C2'  DC A  83      -3.229 -18.357 -24.410  0.00  0.00           C  
ATOM   2622  C1'  DC A  83      -4.723 -18.536 -24.050  0.00  0.00           C  
ATOM   2623  N1   DC A  83      -5.023 -17.741 -22.760  7.00  0.00           N  
ATOM   2624  C2   DC A  83      -6.100 -16.782 -22.710  4.00  0.00           C  
ATOM   2625  O2   DC A  83      -6.788 -16.549 -23.680  9.00  0.00           O  
ATOM   2626  N3   DC A  83      -6.300 -15.957 -21.640  6.00  0.00           N  
ATOM   2627  C4   DC A  83      -5.542 -16.082 -20.570  4.00  0.00           C  
ATOM   2628  N4   DC A  83      -5.798 -15.297 -19.590  3.00  0.00           N  
ATOM   2629  C5   DC A  83      -4.509 -17.118 -20.500  6.00  0.00           C  
ATOM   2630  C6   DC A  83      -4.309 -17.902 -21.580  8.00  0.00           C  
ATOM   2631  OP1  DC A  83      -1.149 -22.921 -21.860  5.00  0.00           O  
ATOM   2632  OP2  DC A  83      -0.867 -20.744 -20.580  0.00  0.00           O1-
ATOM   2633  H5   DC A  83      -3.970 -17.240 -19.580  2.00  0.00           H  
ATOM   2634  H6   DC A  83      -3.655 -18.740 -21.500  4.00  0.00           H  
ATOM   2635  H1'  DC A  83      -5.367 -18.170 -24.860  4.00  0.00           H  
ATOM   2636  H2'  DC A  83      -2.589 -18.307 -23.530  9.00  0.00           H  
ATOM   2637  H3'  DC A  83      -1.948 -19.989 -25.130  8.00  0.00           H  
ATOM   2638  H4'  DC A  83      -4.385 -21.316 -25.280  0.00  0.00           H  
ATOM   2639  H41  DC A  83      -6.415 -14.509 -19.770  1.00  0.00           H  
ATOM   2640  H5'  DC A  83      -4.079 -22.131 -23.130  6.00  0.00           H  
ATOM   2641  H42  DC A  83      -5.253 -15.338 -18.710  1.00  0.00           H  
ATOM   2642 H2''  DC A  83      -2.978 -17.472 -25.010  4.00  0.00           H  
ATOM   2643 H5''  DC A  83      -2.515 -21.966 -24.020  0.00  0.00           H  
ATOM   2644  P    DC A  84      -2.588 -18.657 -27.610  8.00  0.00           P  
ATOM   2645  C5'  DC A  84      -4.890 -17.380 -27.930  3.00  0.00           C  
ATOM   2646  O5'  DC A  84      -3.494 -17.292 -27.550  3.00  0.00           O  
ATOM   2647  C4'  DC A  84      -5.622 -16.007 -27.950  8.00  0.00           C  
ATOM   2648  O4'  DC A  84      -5.697 -15.505 -26.640  8.00  0.00           O  
ATOM   2649  C3'  DC A  84      -4.827 -15.018 -28.810  9.00  0.00           C  
ATOM   2650  O3'  DC A  84      -5.715 -14.271 -29.650  3.00  0.00           O  
ATOM   2651  C2'  DC A  84      -4.132 -14.145 -27.710  2.00  0.00           C  
ATOM   2652  C1'  DC A  84      -5.218 -14.146 -26.650  0.00  0.00           C  
ATOM   2653  N1   DC A  84      -4.765 -13.836 -25.290  4.00  0.00           N  
ATOM   2654  C2   DC A  84      -5.111 -12.687 -24.590  1.00  0.00           C  
ATOM   2655  O2   DC A  84      -6.015 -11.910 -25.010  9.00  0.00           O  
ATOM   2656  N3   DC A  84      -4.736 -12.392 -23.360  3.00  0.00           N  
ATOM   2657  C4   DC A  84      -3.919 -13.242 -22.760  2.00  0.00           C  
ATOM   2658  N4   DC A  84      -3.462 -13.000 -21.560  3.00  0.00           N  
ATOM   2659  C5   DC A  84      -3.484 -14.474 -23.380  0.00  0.00           C  
ATOM   2660  C6   DC A  84      -3.970 -14.709 -24.620  1.00  0.00           C  
ATOM   2661  OP1  DC A  84      -2.715 -19.196 -28.980  0.00  0.00           O  
ATOM   2662  OP2  DC A  84      -1.294 -18.344 -27.070  0.00  0.00           O1-
ATOM   2663  H5   DC A  84      -2.899 -15.201 -22.830  8.00  0.00           H  
ATOM   2664  H6   DC A  84      -3.654 -15.542 -25.180  8.00  0.00           H  
ATOM   2665  H1'  DC A  84      -6.027 -13.489 -27.010  0.00  0.00           H  
ATOM   2666  H2'  DC A  84      -3.179 -14.587 -27.400  5.00  0.00           H  
ATOM   2667  H3'  DC A  84      -4.022 -15.501 -29.360  2.00  0.00           H  
ATOM   2668  H4'  DC A  84      -6.629 -16.096 -28.470  6.00  0.00           H  
ATOM   2669  H41  DC A  84      -3.721 -12.151 -21.060  0.00  0.00           H  
ATOM   2670  H5'  DC A  84      -5.363 -18.105 -27.260  1.00  0.00           H  
ATOM   2671  H42  DC A  84      -3.279 -13.824 -21.080  9.00  0.00           H  
ATOM   2672 H2''  DC A  84      -3.990 -13.085 -28.070  6.00  0.00           H  
ATOM   2673 H5''  DC A  84      -4.939 -17.855 -28.930  0.00  0.00           H  
ATOM   2674  P    DT A  85      -5.122 -13.655 -31.000  2.00  0.00           P  
ATOM   2675  C5'  DT A  85      -5.885 -11.316 -30.170  4.00  0.00           C  
ATOM   2676  O5'  DT A  85      -4.878 -12.208 -30.520  7.00  0.00           O  
ATOM   2677  C4'  DT A  85      -5.440 -10.134 -29.260  7.00  0.00           C  
ATOM   2678  O4'  DT A  85      -4.889 -10.562 -28.000  5.00  0.00           O  
ATOM   2679  C3'  DT A  85      -4.382  -9.170 -29.860  4.00  0.00           C  
ATOM   2680  O3'  DT A  85      -4.695  -7.796 -29.690  0.00  0.00           O  
ATOM   2681  C2'  DT A  85      -3.148  -9.528 -29.000  5.00  0.00           C  
ATOM   2682  C1'  DT A  85      -3.885  -9.615 -27.670  2.00  0.00           C  
ATOM   2683  N1   DT A  85      -3.122 -10.216 -26.540  1.00  0.00           N  
ATOM   2684  C2   DT A  85      -3.357  -9.678 -25.280  9.00  0.00           C  
ATOM   2685  O2   DT A  85      -4.106  -8.764 -25.090  6.00  0.00           O  
ATOM   2686  N3   DT A  85      -2.678 -10.196 -24.160  0.00  0.00           N  
ATOM   2687  C4   DT A  85      -1.735 -11.154 -24.240  7.00  0.00           C  
ATOM   2688  O4   DT A  85      -1.284 -11.638 -23.180  3.00  0.00           O  
ATOM   2689  C5   DT A  85      -1.502 -11.686 -25.610  8.00  0.00           C  
ATOM   2690  C6   DT A  85      -2.200 -11.194 -26.690  5.00  0.00           C  
ATOM   2691  C7   DT A  85      -0.642 -12.882 -25.700  4.00  0.00           C  
ATOM   2692  OP1  DT A  85      -6.213 -13.445 -31.900  0.00  0.00           O  
ATOM   2693  OP2  DT A  85      -3.813 -14.234 -31.380  6.00  0.00           O1-
ATOM   2694  H3   DT A  85      -2.656  -9.758 -23.250  1.00  0.00           H  
ATOM   2695  H6   DT A  85      -2.083 -11.627 -27.640  4.00  0.00           H  
ATOM   2696  H1'  DT A  85      -4.418  -8.731 -27.390  1.00  0.00           H  
ATOM   2697  H2'  DT A  85      -2.756 -10.542 -29.340  8.00  0.00           H  
ATOM   2698  H3'  DT A  85      -4.260  -9.265 -30.960  1.00  0.00           H  
ATOM   2699  H4'  DT A  85      -6.341  -9.545 -29.050  2.00  0.00           H  
ATOM   2700  H5'  DT A  85      -6.761 -11.716 -29.640  3.00  0.00           H  
ATOM   2701  H71  DT A  85      -1.221 -13.742 -25.550  2.00  0.00           H  
ATOM   2702  H72  DT A  85      -0.191 -12.924 -26.730  2.00  0.00           H  
ATOM   2703  H73  DT A  85       0.116 -12.869 -24.940  6.00  0.00           H  
ATOM   2704 H2''  DT A  85      -2.443  -8.784 -29.050  3.00  0.00           H  
ATOM   2705 H5''  DT A  85      -6.310 -11.091 -31.090  9.00  0.00           H  
ATOM   2706  P    DA A  86      -4.088  -6.662 -30.680  6.00  0.00           P  
ATOM   2707  C5'  DA A  86      -5.628  -4.871 -29.460  3.00  0.00           C  
ATOM   2708  O5'  DA A  86      -4.329  -5.300 -29.800  6.00  0.00           O  
ATOM   2709  C4'  DA A  86      -5.669  -4.225 -28.090  6.00  0.00           C  
ATOM   2710  O4'  DA A  86      -5.194  -5.105 -27.040  4.00  0.00           O  
ATOM   2711  C3'  DA A  86      -4.696  -2.984 -28.060  7.00  0.00           C  
ATOM   2712  O3'  DA A  86      -5.129  -1.989 -27.110  9.00  0.00           O  
ATOM   2713  C2'  DA A  86      -3.540  -3.670 -27.530  3.00  0.00           C  
ATOM   2714  C1'  DA A  86      -3.969  -4.613 -26.520  2.00  0.00           C  
ATOM   2715  N1   DA A  86      -1.322  -6.817 -22.790  8.00  0.00           N  
ATOM   2716  C2   DA A  86      -2.232  -5.897 -22.800  3.00  0.00           C  
ATOM   2717  N3   DA A  86      -2.904  -5.333 -23.850  6.00  0.00           N  
ATOM   2718  C4   DA A  86      -2.591  -5.989 -24.990  8.00  0.00           C  
ATOM   2719  C5   DA A  86      -1.587  -6.951 -25.130  6.00  0.00           C  
ATOM   2720  C6   DA A  86      -1.028  -7.459 -23.910  3.00  0.00           C  
ATOM   2721  N6   DA A  86      -0.052  -8.316 -23.880  7.00  0.00           N  
ATOM   2722  N7   DA A  86      -1.393  -7.329 -26.470  1.00  0.00           N  
ATOM   2723  C8   DA A  86      -2.290  -6.565 -27.060  1.00  0.00           C  
ATOM   2724  N9   DA A  86      -2.974  -5.712 -26.210  3.00  0.00           N  
ATOM   2725  OP1  DA A  86      -4.982  -6.691 -31.840  8.00  0.00           O  
ATOM   2726  OP2  DA A  86      -2.673  -6.907 -30.920  0.00  0.00           O1-
ATOM   2727  H2   DA A  86      -2.405  -5.486 -21.860  3.00  0.00           H  
ATOM   2728  H8   DA A  86      -2.393  -6.473 -28.120  5.00  0.00           H  
ATOM   2729  H1'  DA A  86      -4.276  -4.125 -25.570  7.00  0.00           H  
ATOM   2730  H2'  DA A  86      -2.840  -3.971 -28.240  7.00  0.00           H  
ATOM   2731  H3'  DA A  86      -4.394  -2.692 -29.100  2.00  0.00           H  
ATOM   2732  H4'  DA A  86      -6.729  -4.016 -27.950  0.00  0.00           H  
ATOM   2733  H5'  DA A  86      -6.322  -5.700 -29.420  8.00  0.00           H  
ATOM   2734  H61  DA A  86       0.292  -8.592 -22.980  8.00  0.00           H  
ATOM   2735  H62  DA A  86       0.208  -8.748 -24.700  4.00  0.00           H  
ATOM   2736 H2''  DA A  86      -2.993  -2.923 -27.030  1.00  0.00           H  
ATOM   2737 H5''  DA A  86      -5.945  -4.109 -30.200  1.00  0.00           H  
ATOM   2738  P    DA A  87      -5.590  -0.534 -27.540  2.00  0.00           P  
ATOM   2739  C5'  DA A  87      -5.460  -0.125 -25.030  5.00  0.00           C  
ATOM   2740  O5'  DA A  87      -5.135   0.275 -26.310  1.00  0.00           O  
ATOM   2741  C4'  DA A  87      -4.226  -0.532 -24.220  5.00  0.00           C  
ATOM   2742  O4'  DA A  87      -3.529  -1.701 -24.670  1.00  0.00           O  
ATOM   2743  C3'  DA A  87      -3.155   0.557 -24.180  5.00  0.00           C  
ATOM   2744  O3'  DA A  87      -3.608   1.711 -23.460  6.00  0.00           O  
ATOM   2745  C2'  DA A  87      -2.134  -0.295 -23.370  7.00  0.00           C  
ATOM   2746  C1'  DA A  87      -2.503  -1.702 -23.770  2.00  0.00           C  
ATOM   2747  N1   DA A  87       1.164  -4.892 -22.300  1.00  0.00           N  
ATOM   2748  C2   DA A  87       0.400  -4.018 -21.570  4.00  0.00           C  
ATOM   2749  N3   DA A  87      -0.416  -3.165 -22.080  4.00  0.00           N  
ATOM   2750  C4   DA A  87      -0.371  -3.079 -23.430  8.00  0.00           C  
ATOM   2751  C5   DA A  87       0.428  -3.760 -24.300  8.00  0.00           C  
ATOM   2752  C6   DA A  87       1.141  -4.775 -23.650  7.00  0.00           C  
ATOM   2753  N6   DA A  87       1.933  -5.742 -24.220  2.00  0.00           N  
ATOM   2754  N7   DA A  87       0.303  -3.313 -25.610  8.00  0.00           N  
ATOM   2755  C8   DA A  87      -0.713  -2.455 -25.530  4.00  0.00           C  
ATOM   2756  N9   DA A  87      -1.259  -2.341 -24.270  1.00  0.00           N  
ATOM   2757  OP1  DA A  87      -7.054  -0.484 -27.680  9.00  0.00           O  
ATOM   2758  OP2  DA A  87      -4.780  -0.101 -28.690  3.00  0.00           O1-
ATOM   2759  H2   DA A  87       0.537  -4.039 -20.480  0.00  0.00           H  
ATOM   2760  H8   DA A  87      -1.045  -1.884 -26.360  6.00  0.00           H  
ATOM   2761  H1'  DA A  87      -2.823  -2.241 -22.890  4.00  0.00           H  
ATOM   2762  H2'  DA A  87      -1.133   0.130 -23.680  3.00  0.00           H  
ATOM   2763  H3'  DA A  87      -2.745   0.676 -25.130  9.00  0.00           H  
ATOM   2764  H4'  DA A  87      -4.635  -0.604 -23.220  1.00  0.00           H  
ATOM   2765  H5'  DA A  87      -6.173  -0.950 -25.040  1.00  0.00           H  
ATOM   2766  H61  DA A  87       2.185  -6.496 -23.510  5.00  0.00           H  
ATOM   2767  H62  DA A  87       1.948  -6.056 -25.180  3.00  0.00           H  
ATOM   2768 H2''  DA A  87      -2.282  -0.110 -22.320  9.00  0.00           H  
ATOM   2769 H5''  DA A  87      -5.823   0.749 -24.500  4.00  0.00           H  
ATOM   2770  P    DC A  88      -2.607   2.971 -23.300  9.00  0.00           P  
ATOM   2771  C5'  DC A  88      -2.109   2.324 -20.820  4.00  0.00           C  
ATOM   2772  O5'  DC A  88      -1.662   2.447 -22.110  8.00  0.00           O  
ATOM   2773  C4'  DC A  88      -0.936   2.331 -19.750  2.00  0.00           C  
ATOM   2774  O4'  DC A  88      -0.079   1.300 -20.210  8.00  0.00           O  
ATOM   2775  C3'  DC A  88      -0.002   3.568 -19.830  1.00  0.00           C  
ATOM   2776  O3'  DC A  88       0.427   4.093 -18.570  6.00  0.00           O  
ATOM   2777  C2'  DC A  88       1.200   3.301 -20.660  2.00  0.00           C  
ATOM   2778  C1'  DC A  88       1.203   1.816 -20.520  1.00  0.00           C  
ATOM   2779  N1   DC A  88       1.862   1.036 -21.660  2.00  0.00           N  
ATOM   2780  C2   DC A  88       2.708  -0.027 -21.300  3.00  0.00           C  
ATOM   2781  O2   DC A  88       3.155  -0.182 -20.090  7.00  0.00           O  
ATOM   2782  N3   DC A  88       3.053  -1.026 -22.140  9.00  0.00           N  
ATOM   2783  C4   DC A  88       2.504  -0.984 -23.340  2.00  0.00           C  
ATOM   2784  N4   DC A  88       2.806  -1.986 -24.030  6.00  0.00           N  
ATOM   2785  C5   DC A  88       1.722   0.128 -23.850  2.00  0.00           C  
ATOM   2786  C6   DC A  88       1.424   1.102 -22.960  5.00  0.00           C  
ATOM   2787  OP1  DC A  88      -3.358   4.188 -22.890  2.00  0.00           O  
ATOM   2788  OP2  DC A  88      -1.823   3.054 -24.520  2.00  0.00           O1-
ATOM   2789  H5   DC A  88       1.388   0.196 -24.850  3.00  0.00           H  
ATOM   2790  H6   DC A  88       0.658   1.867 -23.260  0.00  0.00           H  
ATOM   2791  H1'  DC A  88       1.783   1.711 -19.580  4.00  0.00           H  
ATOM   2792  H2'  DC A  88       1.009   3.427 -21.740  1.00  0.00           H  
ATOM   2793  H3'  DC A  88      -0.598   4.396 -20.270  1.00  0.00           H  
ATOM   2794  H4'  DC A  88      -1.246   2.119 -18.740  4.00  0.00           H  
ATOM   2795  H41  DC A  88       3.476  -2.696 -23.630  4.00  0.00           H  
ATOM   2796  H5'  DC A  88      -2.601   1.329 -20.720  2.00  0.00           H  
ATOM   2797  H42  DC A  88       2.470  -1.926 -24.960  9.00  0.00           H  
ATOM   2798 H2''  DC A  88       2.174   3.720 -20.390  7.00  0.00           H  
ATOM   2799 H5''  DC A  88      -2.824   3.053 -20.590  3.00  0.00           H  
ATOM   2800  P    DC A  89       1.201   5.531 -18.450  7.00  0.00           P  
ATOM   2801  C5'  DC A  89       3.383   4.736 -17.300  3.00  0.00           C  
ATOM   2802  O5'  DC A  89       2.789   5.191 -18.470  5.00  0.00           O  
ATOM   2803  C4'  DC A  89       4.691   3.954 -17.460  2.00  0.00           C  
ATOM   2804  O4'  DC A  89       4.793   2.849 -18.260  8.00  0.00           O  
ATOM   2805  C3'  DC A  89       5.777   4.878 -18.010  9.00  0.00           C  
ATOM   2806  O3'  DC A  89       6.366   5.666 -17.000  9.00  0.00           O  
ATOM   2807  C2'  DC A  89       6.831   3.927 -18.570  3.00  0.00           C  
ATOM   2808  C1'  DC A  89       6.090   2.749 -18.970  7.00  0.00           C  
ATOM   2809  N1   DC A  89       5.778   2.664 -20.420  7.00  0.00           N  
ATOM   2810  C2   DC A  89       6.430   1.608 -21.130  1.00  0.00           C  
ATOM   2811  O2   DC A  89       7.293   0.876 -20.650  2.00  0.00           O  
ATOM   2812  N3   DC A  89       6.020   1.227 -22.330  1.00  0.00           N  
ATOM   2813  C4   DC A  89       5.005   1.978 -22.860  4.00  0.00           C  
ATOM   2814  N4   DC A  89       4.462   1.659 -24.020  0.00  0.00           N  
ATOM   2815  C5   DC A  89       4.498   3.169 -22.280  1.00  0.00           C  
ATOM   2816  C6   DC A  89       4.849   3.431 -21.020  5.00  0.00           C  
ATOM   2817  OP1  DC A  89       0.878   6.066 -17.130  1.00  0.00           O  
ATOM   2818  OP2  DC A  89       0.814   6.252 -19.640  4.00  0.00           O1-
ATOM   2819  H5   DC A  89       3.816   3.827 -22.820  0.00  0.00           H  
ATOM   2820  H6   DC A  89       4.478   4.318 -20.560  6.00  0.00           H  
ATOM   2821  H1'  DC A  89       6.628   1.818 -18.650  3.00  0.00           H  
ATOM   2822  H2'  DC A  89       7.463   4.356 -19.330  6.00  0.00           H  
ATOM   2823  H3'  DC A  89       5.310   5.473 -18.680  8.00  0.00           H  
ATOM   2824  H4'  DC A  89       5.003   3.549 -16.430  2.00  0.00           H  
ATOM   2825  H41  DC A  89       4.774   0.865 -24.570  1.00  0.00           H  
ATOM   2826  H5'  DC A  89       2.729   3.954 -16.760  8.00  0.00           H  
ATOM   2827  H42  DC A  89       3.584   2.076 -24.250  1.00  0.00           H  
ATOM   2828 H2''  DC A  89       7.532   3.692 -17.700  6.00  0.00           H  
ATOM   2829 H5''  DC A  89       3.630   5.574 -16.550  5.00  0.00           H  
ATOM   2830  P   DC3 A  90       7.172   7.054 -17.270  0.00  0.00           P  
ATOM   2831  C5' DC3 A  90       9.556   5.935 -17.130  8.00  0.00           C  
ATOM   2832  O5' DC3 A  90       8.619   6.659 -17.910  1.00  0.00           O  
ATOM   2833  C4' DC3 A  90      10.544   5.183 -18.100  3.00  0.00           C  
ATOM   2834  O4' DC3 A  90       9.843   4.615 -19.180  9.00  0.00           O  
ATOM   2835  C3' DC3 A  90      11.600   6.059 -18.800  2.00  0.00           C  
ATOM   2836  O3' DC3 A  90      12.918   5.538 -19.060  3.00  0.00           O  
ATOM   2837  C2' DC3 A  90      10.952   6.450 -20.080  3.00  0.00           C  
ATOM   2838  C1' DC3 A  90      10.383   5.078 -20.380  0.00  0.00           C  
ATOM   2839  N1  DC3 A  90       9.282   5.076 -21.410  7.00  0.00           N  
ATOM   2840  C2  DC3 A  90       9.016   3.893 -22.100  7.00  0.00           C  
ATOM   2841  O2  DC3 A  90       9.690   2.876 -21.950  0.00  0.00           O  
ATOM   2842  N3  DC3 A  90       8.063   3.861 -23.050  2.00  0.00           N  
ATOM   2843  C4  DC3 A  90       7.395   4.971 -23.370  5.00  0.00           C  
ATOM   2844  N4  DC3 A  90       6.477   4.852 -24.290  3.00  0.00           N  
ATOM   2845  C5  DC3 A  90       7.609   6.183 -22.650  0.00  0.00           C  
ATOM   2846  C6  DC3 A  90       8.545   6.189 -21.650  8.00  0.00           C  
ATOM   2847  OP1 DC3 A  90       7.506   7.703 -15.990  8.00  0.00           O  
ATOM   2848  OP2 DC3 A  90       6.438   7.796 -18.360  8.00  0.00           O  
ATOM   2849 HO3' DC3 A  90      13.562   6.225 -19.070  5.00  0.00           H  
ATOM   2850  H5  DC3 A  90       7.070   7.046 -22.890  1.00  0.00           H  
ATOM   2851  H6  DC3 A  90       8.694   7.124 -21.120  7.00  0.00           H  
ATOM   2852  H1' DC3 A  90      11.177   4.385 -20.660  5.00  0.00           H  
ATOM   2853  H2' DC3 A  90      10.330   7.263 -19.960  6.00  0.00           H  
ATOM   2854  H3' DC3 A  90      11.643   7.029 -18.190  8.00  0.00           H  
ATOM   2855  H4' DC3 A  90      11.151   4.517 -17.480  7.00  0.00           H  
ATOM   2856  H41 DC3 A  90       6.385   3.971 -24.760  8.00  0.00           H  
ATOM   2857  H5' DC3 A  90       9.055   5.135 -16.580  0.00  0.00           H  
ATOM   2858  H42 DC3 A  90       5.910   5.682 -24.550  5.00  0.00           H  
ATOM   2859 H2'' DC3 A  90      11.622   6.796 -20.830  1.00  0.00           H  
ATOM   2860 H5'' DC3 A  90      10.088   6.616 -16.460  1.00  0.00           H  
ATOM   3171  C   CNT A 208     -38.432 -28.909  12.880  4.00  0.00           C  
ATOM   3172  C   CNT A 208     -38.857 -27.611  12.840  6.00  0.00           C  
ATOM   3173  C   CNT A 208     -37.877 -26.664  12.400  2.00  0.00           C  
ATOM   3174  C   CNT A 208     -37.914 -25.270  12.800  2.00  0.00           C  
ATOM   3175  C   CNT A 208     -39.952 -27.011  13.600  2.00  0.00           C  
ATOM   3176  C   CNT A 208     -39.628 -25.891  14.400  9.00  0.00           C  
ATOM   3177  C   CNT A 208     -38.636 -24.990  14.000  9.00  0.00           C  
ATOM   3178  C   CNT A 208     -38.228 -23.907  14.770  8.00  0.00           C  
ATOM   3179  C   CNT A 208     -40.097 -25.662  15.720  2.00  0.00           C  
ATOM   3180  C   CNT A 208     -39.453 -24.827  16.670  8.00  0.00           C  
ATOM   3181  C   CNT A 208     -38.545 -23.881  16.170  1.00  0.00           C  
ATOM   3182  C   CNT A 208     -37.611 -23.273  17.050  0.00  0.00           C  
ATOM   3183  C   CNT A 208     -39.337 -25.076  18.070  0.00  0.00           C  
ATOM   3184  C   CNT A 208     -38.151 -24.836  18.840  7.00  0.00           C  
ATOM   3185  C   CNT A 208     -37.206 -23.891  18.210  4.00  0.00           C  
ATOM   3186  C   CNT A 208     -35.876 -23.850  18.680  6.00  0.00           C  
ATOM   3187  C   CNT A 208     -37.548 -25.547  19.980  8.00  0.00           C  
ATOM   3188  C   CNT A 208     -36.219 -25.814  20.150  6.00  0.00           C  
ATOM   3189  C   CNT A 208     -35.349 -25.001  19.390  6.00  0.00           C  
ATOM   3190  C   CNT A 208     -34.017 -25.405  19.260  3.00  0.00           C  
ATOM   3191  C   CNT A 208     -35.689 -27.137  20.390  5.00  0.00           C  
ATOM   3192  C   CNT A 208     -34.574 -27.744  19.810  3.00  0.00           C  
ATOM   3193  C   CNT A 208     -33.647 -26.801  19.270  5.00  0.00           C  
ATOM   3194  C   CNT A 208     -32.711 -27.201  18.370  3.00  0.00           C  
ATOM   3195  C   CNT A 208     -34.271 -29.091  19.630  3.00  0.00           C  
ATOM   3196  C   CNT A 208     -33.604 -29.465  18.390  7.00  0.00           C  
ATOM   3197  C   CNT A 208     -32.816 -28.468  17.760  7.00  0.00           C  
ATOM   3198  C   CNT A 208     -32.379 -28.649  16.430  7.00  0.00           C  
ATOM   3199  C   CNT A 208     -33.853 -30.682  17.610  5.00  0.00           C  
ATOM   3200  C   CNT A 208     -33.986 -30.476  16.220  6.00  0.00           C  
ATOM   3201  C   CNT A 208     -33.110 -29.496  15.630  0.00  0.00           C  
ATOM   3202  C   CNT A 208     -33.173 -29.181  14.300  3.00  0.00           C  
ATOM   3203  C   CNT A 208     -35.050 -30.839  15.390  7.00  0.00           C  
ATOM   3204  C   CNT A 208     -35.321 -30.379  14.100  4.00  0.00           C  
ATOM   3205  C   CNT A 208     -34.347 -29.481  13.560  5.00  0.00           C  
ATOM   3206  C   CNT A 208     -34.751 -28.625  12.480  7.00  0.00           C  
ATOM   3207  C   CNT A 208     -36.493 -30.466  13.460  2.00  0.00           C  
ATOM   3208  C   CNT A 208     -37.064 -29.333  12.820  5.00  0.00           C  
ATOM   3209  C   CNT A 208     -36.116 -28.423  12.240  6.00  0.00           C  
ATOM   3210  C   CNT A 208     -36.685 -27.160  11.840  8.00  0.00           C  
ATOM   3211  C   CNT A 208     -35.735 -26.245  11.290  3.00  0.00           C  
ATOM   3212  C   CNT A 208     -36.085 -24.837  11.310  3.00  0.00           C  
ATOM   3213  C   CNT A 208     -35.170 -23.887  10.840  4.00  0.00           C  
ATOM   3214  C   CNT A 208     -35.279 -22.531  11.250  2.00  0.00           C  
ATOM   3215  C   CNT A 208     -37.037 -24.402  12.270  9.00  0.00           C  
ATOM   3216  C   CNT A 208     -36.901 -23.168  12.940  2.00  0.00           C  
ATOM   3217  C   CNT A 208     -36.078 -22.178  12.360  1.00  0.00           C  
ATOM   3218  C   CNT A 208     -35.684 -21.043  13.160  9.00  0.00           C  
ATOM   3219  C   CNT A 208     -37.323 -23.007  14.230  6.00  0.00           C  
ATOM   3220  C   CNT A 208     -36.676 -22.136  15.090  9.00  0.00           C  
ATOM   3221  C   CNT A 208     -35.747 -21.246  14.540  0.00  0.00           C  
ATOM   3222  C   CNT A 208     -34.798 -20.561  15.340  8.00  0.00           C  
ATOM   3223  C   CNT A 208     -36.680 -22.376  16.450  9.00  0.00           C  
ATOM   3224  C   CNT A 208     -35.471 -22.038  17.180  8.00  0.00           C  
ATOM   3225  C   CNT A 208     -34.492 -21.170  16.590  9.00  0.00           C  
ATOM   3226  C   CNT A 208     -33.167 -21.137  17.130  9.00  0.00           C  
ATOM   3227  C   CNT A 208     -34.984 -22.909  18.210  2.00  0.00           C  
ATOM   3228  C   CNT A 208     -33.613 -23.178  18.260  0.00  0.00           C  
ATOM   3229  C   CNT A 208     -32.688 -22.335  17.690  5.00  0.00           C  
ATOM   3230  C   CNT A 208     -31.357 -22.665  17.480  2.00  0.00           C  
ATOM   3231  C   CNT A 208     -33.197 -24.443  18.540  3.00  0.00           C  
ATOM   3232  C   CNT A 208     -32.002 -24.912  17.960  0.00  0.00           C  
ATOM   3233  C   CNT A 208     -31.010 -24.019  17.500  7.00  0.00           C  
ATOM   3234  C   CNT A 208     -30.033 -24.513  16.640  3.00  0.00           C  
ATOM   3235  C   CNT A 208     -31.849 -26.281  17.750  9.00  0.00           C  
ATOM   3236  C   CNT A 208     -31.045 -26.669  16.620  6.00  0.00           C  
ATOM   3237  C   CNT A 208     -30.096 -25.771  16.110  6.00  0.00           C  
ATOM   3238  C   CNT A 208     -29.563 -26.006  14.770  7.00  0.00           C  
ATOM   3239  C   CNT A 208     -31.449 -27.741  15.860  8.00  0.00           C  
ATOM   3240  C   CNT A 208     -31.267 -27.717  14.480  0.00  0.00           C  
ATOM   3241  C   CNT A 208     -30.356 -26.799  13.890  6.00  0.00           C  
ATOM   3242  C   CNT A 208     -30.425 -26.534  12.560  9.00  0.00           C  
ATOM   3243  C   CNT A 208     -32.291 -28.302  13.670  4.00  0.00           C  
ATOM   3244  C   CNT A 208     -32.530 -27.731  12.410  2.00  0.00           C  
ATOM   3245  C   CNT A 208     -31.603 -26.830  11.870  7.00  0.00           C  
ATOM   3246  C   CNT A 208     -32.043 -25.840  10.920  9.00  0.00           C  
ATOM   3247  C   CNT A 208     -33.860 -27.675  11.970  8.00  0.00           C  
ATOM   3248  C   CNT A 208     -34.365 -26.532  11.320  0.00  0.00           C  
ATOM   3249  C   CNT A 208     -33.401 -25.582  10.860  5.00  0.00           C  
ATOM   3250  C   CNT A 208     -33.916 -24.335  10.440  4.00  0.00           C  
ATOM   3251  C   CNT A 208     -33.014 -23.433   9.920  9.00  0.00           C  
ATOM   3252  C   CNT A 208     -33.340 -22.051   9.920  1.00  0.00           C  
ATOM   3253  C   CNT A 208     -32.533 -21.122   9.320  3.00  0.00           C  
ATOM   3254  C   CNT A 208     -32.545 -19.824   9.730  6.00  0.00           C  
ATOM   3255  C   CNT A 208     -34.368 -21.626  10.760  1.00  0.00           C  
ATOM   3256  C   CNT A 208     -34.173 -20.381  11.410  1.00  0.00           C  
ATOM   3257  C   CNT A 208     -33.231 -19.480  10.920  8.00  0.00           C  
ATOM   3258  C   CNT A 208     -32.839 -18.341  11.650  1.00  0.00           C  
ATOM   3259  C   CNT A 208     -34.642 -20.240  12.700  2.00  0.00           C  
ATOM   3260  C   CNT A 208     -33.893 -19.370  13.510  6.00  0.00           C  
ATOM   3261  C   CNT A 208     -33.022 -18.399  13.020  8.00  0.00           C  
ATOM   3262  C   CNT A 208     -32.118 -17.714  13.870  8.00  0.00           C  
ATOM   3263  C   CNT A 208     -33.840 -19.674  14.910  2.00  0.00           C  
ATOM   3264  C   CNT A 208     -32.701 -19.293  15.630  3.00  0.00           C  
ATOM   3265  C   CNT A 208     -31.730 -18.446  15.030  3.00  0.00           C  
ATOM   3266  C   CNT A 208     -30.407 -18.438  15.440  0.00  0.00           C  
ATOM   3267  C   CNT A 208     -32.266 -20.183  16.650  7.00  0.00           C  
ATOM   3268  C   CNT A 208     -30.867 -20.490  16.680  3.00  0.00           C  
ATOM   3269  C   CNT A 208     -29.971 -19.587  16.110  1.00  0.00           C  
ATOM   3270  C   CNT A 208     -28.641 -19.955  15.910  6.00  0.00           C  
ATOM   3271  C   CNT A 208     -30.472 -21.789  16.900  4.00  0.00           C  
ATOM   3272  C   CNT A 208     -29.312 -22.224  16.250  4.00  0.00           C  
ATOM   3273  C   CNT A 208     -28.337 -21.298  15.810  1.00  0.00           C  
ATOM   3274  C   CNT A 208     -27.308 -21.755  15.000  1.00  0.00           C  
ATOM   3275  C   CNT A 208     -29.200 -23.549  15.990  2.00  0.00           C  
ATOM   3276  C   CNT A 208     -28.280 -23.981  15.010  4.00  0.00           C  
ATOM   3277  C   CNT A 208     -27.419 -23.039  14.410  0.00  0.00           C  
ATOM   3278  C   CNT A 208     -26.894 -23.301  13.170  5.00  0.00           C  
ATOM   3279  C   CNT A 208     -28.651 -25.094  14.250  4.00  0.00           C  
ATOM   3280  C   CNT A 208     -28.466 -25.133  12.860  6.00  0.00           C  
ATOM   3281  C   CNT A 208     -27.555 -24.167  12.280  0.00  0.00           C  
ATOM   3282  C   CNT A 208     -27.798 -23.674  11.010  1.00  0.00           C  
ATOM   3283  C   CNT A 208     -29.509 -25.638  12.020  2.00  0.00           C  
ATOM   3284  C   CNT A 208     -29.756 -24.985  10.830  6.00  0.00           C  
ATOM   3285  C   CNT A 208     -28.911 -23.983  10.300  1.00  0.00           C  
ATOM   3286  C   CNT A 208     -29.442 -23.131   9.350  2.00  0.00           C  
ATOM   3287  C   CNT A 208     -31.109 -24.964  10.420  1.00  0.00           C  
ATOM   3288  C   CNT A 208     -31.660 -23.811   9.800  1.00  0.00           C  
ATOM   3289  C   CNT A 208     -30.796 -22.845   9.260  7.00  0.00           C  
ATOM   3290  C   CNT A 208     -31.291 -21.630   8.810  4.00  0.00           C  
ATOM   3291  C   CNT A 208     -30.374 -20.699   8.280  0.00  0.00           C  
ATOM   3292  C   CNT A 208     -30.658 -19.287   8.300  6.00  0.00           C  
ATOM   3293  C   CNT A 208     -29.782 -18.398   7.730  5.00  0.00           C  
ATOM   3294  C   CNT A 208     -29.853 -17.025   8.060  1.00  0.00           C  
ATOM   3295  C   CNT A 208     -31.659 -18.881   9.150  1.00  0.00           C  
ATOM   3296  C   CNT A 208     -31.503 -17.590   9.700  8.00  0.00           C  
ATOM   3297  C   CNT A 208     -30.582 -16.675   9.210  0.00  0.00           C  
ATOM   3298  C   CNT A 208     -30.135 -15.555   9.980  3.00  0.00           C  
ATOM   3299  C   CNT A 208     -31.939 -17.445  11.080  1.00  0.00           C  
ATOM   3300  C   CNT A 208     -31.242 -16.530  11.950  7.00  0.00           C  
ATOM   3301  C   CNT A 208     -30.327 -15.595  11.350  8.00  0.00           C  
ATOM   3302  C   CNT A 208     -29.316 -15.071  12.170  1.00  0.00           C  
ATOM   3303  C   CNT A 208     -31.189 -16.831  13.280  9.00  0.00           C  
ATOM   3304  C   CNT A 208     -29.971 -16.539  13.950  5.00  0.00           C  
ATOM   3305  C   CNT A 208     -29.050 -15.713  13.360  6.00  0.00           C  
ATOM   3306  C   CNT A 208     -27.745 -15.680  13.920  5.00  0.00           C  
ATOM   3307  C   CNT A 208     -29.468 -17.456  14.960  4.00  0.00           C  
ATOM   3308  C   CNT A 208     -28.120 -17.741  15.090  1.00  0.00           C  
ATOM   3309  C   CNT A 208     -27.208 -16.807  14.550  4.00  0.00           C  
ATOM   3310  C   CNT A 208     -25.913 -17.197  14.260  5.00  0.00           C  
ATOM   3311  C   CNT A 208     -27.703 -19.008  15.450  6.00  0.00           C  
ATOM   3312  C   CNT A 208     -26.507 -19.498  14.960  5.00  0.00           C  
ATOM   3313  C   CNT A 208     -25.642 -18.537  14.260  5.00  0.00           C  
ATOM   3314  C   CNT A 208     -24.564 -19.039  13.480  4.00  0.00           C  
ATOM   3315  C   CNT A 208     -26.369 -20.870  14.560  6.00  0.00           C  
ATOM   3316  C   CNT A 208     -25.620 -21.229  13.480  1.00  0.00           C  
ATOM   3317  C   CNT A 208     -24.699 -20.323  12.980  1.00  0.00           C  
ATOM   3318  C   CNT A 208     -24.172 -20.485  11.630  1.00  0.00           C  
ATOM   3319  C   CNT A 208     -25.995 -22.359  12.690  8.00  0.00           C  
ATOM   3320  C   CNT A 208     -25.854 -22.269  11.280  8.00  0.00           C  
ATOM   3321  C   CNT A 208     -24.897 -21.412  10.790  3.00  0.00           C  
ATOM   3322  C   CNT A 208     -25.050 -20.989   9.430  9.00  0.00           C  
ATOM   3323  C   CNT A 208     -26.909 -22.767  10.490  4.00  0.00           C  
ATOM   3324  C   CNT A 208     -27.173 -22.178   9.230  2.00  0.00           C  
ATOM   3325  C   CNT A 208     -26.280 -21.210   8.760  4.00  0.00           C  
ATOM   3326  C   CNT A 208     -26.730 -20.315   7.740  0.00  0.00           C  
ATOM   3327  C   CNT A 208     -28.519 -22.242   8.740  8.00  0.00           C  
ATOM   3328  C   CNT A 208     -29.037 -21.096   8.070  8.00  0.00           C  
ATOM   3329  C   CNT A 208     -28.109 -20.140   7.610  4.00  0.00           C  
ATOM   3330  C   CNT A 208     -28.590 -18.840   7.210  8.00  0.00           C  
ATOM   3331  C   CNT A 208     -27.631 -17.949   6.630  4.00  0.00           C  
ATOM   3332  C   CNT A 208     -27.925 -16.559   6.630  4.00  0.00           C  
ATOM   3333  C   CNT A 208     -27.042 -15.654   6.030  3.00  0.00           C  
ATOM   3334  C   CNT A 208     -27.225 -14.269   6.320  1.00  0.00           C  
ATOM   3335  C   CNT A 208     -28.977 -16.137   7.500  9.00  0.00           C  
ATOM   3336  C   CNT A 208     -28.798 -14.833   8.110  6.00  0.00           C  
ATOM   3337  C   CNT A 208     -27.931 -13.893   7.510  2.00  0.00           C  
ATOM   3338  C   CNT A 208     -27.378 -12.899   8.350  9.00  0.00           C  
ATOM   3339  C   CNT A 208     -29.226 -14.643   9.400  0.00  0.00           C  
ATOM   3340  C   CNT A 208     -28.495 -13.783  10.260  8.00  0.00           C  
ATOM   3341  C   CNT A 208     -27.581 -12.933   9.700  6.00  0.00           C  
ATOM   3342  C   CNT A 208     -26.608 -12.333  10.560  6.00  0.00           C  
ATOM   3343  C   CNT A 208     -28.414 -14.135  11.630  5.00  0.00           C  
ATOM   3344  C   CNT A 208     -27.208 -13.834  12.380  2.00  0.00           C  
ATOM   3345  C   CNT A 208     -26.279 -12.981  11.750  5.00  0.00           C  
ATOM   3346  C   CNT A 208     -24.945 -12.937  12.210  1.00  0.00           C  
ATOM   3347  C   CNT A 208     -26.782 -14.731  13.350  6.00  0.00           C  
ATOM   3348  C   CNT A 208     -25.422 -14.951  13.420  1.00  0.00           C  
ATOM   3349  C   CNT A 208     -24.536 -14.023  12.920  1.00  0.00           C  
ATOM   3350  C   CNT A 208     -23.181 -14.455  12.620  5.00  0.00           C  
ATOM   3351  C   CNT A 208     -25.025 -16.285  13.710  9.00  0.00           C  
ATOM   3352  C   CNT A 208     -23.821 -16.720  13.180  6.00  0.00           C  
ATOM   3353  C   CNT A 208     -22.858 -15.845  12.650  8.00  0.00           C  
ATOM   3354  C   CNT A 208     -21.816 -16.244  11.840  7.00  0.00           C  
ATOM   3355  C   CNT A 208     -23.660 -18.083  12.910  5.00  0.00           C  
ATOM   3356  C   CNT A 208     -22.888 -18.462  11.800  3.00  0.00           C  
ATOM   3357  C   CNT A 208     -22.039 -17.493  11.240  3.00  0.00           C  
ATOM   3358  C   CNT A 208     -21.525 -17.711   9.940  7.00  0.00           C  
ATOM   3359  C   CNT A 208     -23.291 -19.586  11.060  9.00  0.00           C  
ATOM   3360  C   CNT A 208     -23.090 -19.584   9.700  3.00  0.00           C  
ATOM   3361  C   CNT A 208     -22.198 -18.654   9.110  1.00  0.00           C  
ATOM   3362  C   CNT A 208     -22.371 -18.223   7.790  0.00  0.00           C  
ATOM   3363  C   CNT A 208     -24.107 -20.109   8.850  4.00  0.00           C  
ATOM   3364  C   CNT A 208     -24.491 -19.330   7.750  8.00  0.00           C  
ATOM   3365  C   CNT A 208     -23.655 -18.410   7.180  0.00  0.00           C  
ATOM   3366  C   CNT A 208     -24.050 -17.591   6.120  6.00  0.00           C  
ATOM   3367  C   CNT A 208     -25.786 -19.429   7.200  4.00  0.00           C  
ATOM   3368  C   CNT A 208     -26.305 -18.347   6.450  3.00  0.00           C  
ATOM   3369  C   CNT A 208     -25.428 -17.406   5.840  1.00  0.00           C  
ATOM   3370  C   CNT A 208     -25.883 -16.135   5.410  1.00  0.00           C  
ATOM   3371  C   CNT A 208     -24.964 -15.195   4.950  2.00  0.00           C  
ATOM   3372  C   CNT A 208     -25.361 -13.845   4.800  9.00  0.00           C  
ATOM   3373  C   CNT A 208     -24.397 -12.879   4.350  7.00  0.00           C  
ATOM   3374  C   CNT A 208     -24.449 -11.524   4.770  7.00  0.00           C  
ATOM   3375  C   CNT A 208     -26.331 -13.392   5.760  6.00  0.00           C  
ATOM   3376  C   CNT A 208     -26.085 -12.106   6.450  7.00  0.00           C  
ATOM   3377  C   CNT A 208     -25.131 -11.240   5.950  1.00  0.00           C  
ATOM   3378  C   CNT A 208     -24.717 -10.172   6.750  6.00  0.00           C  
ATOM   3379  C   CNT A 208     -26.531 -11.957   7.790  7.00  0.00           C  
ATOM   3380  C   CNT A 208     -25.826 -11.050   8.660  2.00  0.00           C  
ATOM   3381  C   CNT A 208     -24.847 -10.242   8.150  1.00  0.00           C  
ATOM   3382  C   CNT A 208     -23.852  -9.600   8.880  3.00  0.00           C  
ATOM   3383  C   CNT A 208     -25.746 -11.384  10.010  8.00  0.00           C  
ATOM   3384  C   CNT A 208     -24.531 -11.093  10.640  2.00  0.00           C  
ATOM   3385  C   CNT A 208     -23.571 -10.200  10.110  2.00  0.00           C  
ATOM   3386  C   CNT A 208     -22.251 -10.174  10.560  5.00  0.00           C  
ATOM   3387  C   CNT A 208     -24.092 -11.932  11.710  8.00  0.00           C  
ATOM   3388  C   CNT A 208     -22.736 -12.209  11.800  9.00  0.00           C  
ATOM   3389  C   CNT A 208     -21.789 -11.300  11.280  3.00  0.00           C  
ATOM   3390  C   CNT A 208     -20.464 -11.694  11.070  1.00  0.00           C  
ATOM   3391  C   CNT A 208     -22.257 -13.472  12.160  1.00  0.00           C  
ATOM   3392  C   CNT A 208     -21.072 -13.994  11.570  6.00  0.00           C  
ATOM   3393  C   CNT A 208     -20.241 -13.070  10.930  4.00  0.00           C  
ATOM   3394  C   CNT A 208     -19.169 -13.554  10.190  1.00  0.00           C  
ATOM   3395  C   CNT A 208     -20.836 -15.382  11.380  2.00  0.00           C  
ATOM   3396  C   CNT A 208     -20.179 -15.711  10.170  5.00  0.00           C  
ATOM   3397  C   CNT A 208     -19.210 -14.855   9.610  9.00  0.00           C  
ATOM   3398  C   CNT A 208     -18.820 -15.049   8.260  7.00  0.00           C  
ATOM   3399  C   CNT A 208     -20.610 -16.827   9.400  5.00  0.00           C  
ATOM   3400  C   CNT A 208     -20.398 -16.847   7.980  6.00  0.00           C  
ATOM   3401  C   CNT A 208     -19.527 -15.911   7.420  1.00  0.00           C  
ATOM   3402  C   CNT A 208     -19.606 -15.592   6.040  8.00  0.00           C  
ATOM   3403  C   CNT A 208     -21.441 -17.363   7.180  2.00  0.00           C  
ATOM   3404  C   CNT A 208     -21.789 -16.645   5.960  6.00  0.00           C  
ATOM   3405  C   CNT A 208     -20.886 -15.701   5.440  4.00  0.00           C  
ATOM   3406  C   CNT A 208     -21.336 -14.714   4.520  4.00  0.00           C  
ATOM   3407  C   CNT A 208     -23.117 -16.676   5.500  5.00  0.00           C  
ATOM   3408  C   CNT A 208     -23.579 -15.487   4.890  7.00  0.00           C  
ATOM   3409  C   CNT A 208     -22.690 -14.613   4.390  6.00  0.00           C  
ATOM   3410  C   CNT A 208     -23.152 -13.343   3.970  2.00  0.00           C  
ATOM   3411  C   CNT A 208     -22.280 -12.413   3.390  8.00  0.00           C  
ATOM   3412  C   CNT A 208     -22.642 -11.069   3.310  3.00  0.00           C  
ATOM   3413  C   CNT A 208     -21.767 -10.123   2.740  5.00  0.00           C  
ATOM   3414  C   CNT A 208     -21.795  -8.759   3.160  3.00  0.00           C  
ATOM   3415  C   CNT A 208     -23.563 -10.598   4.210  5.00  0.00           C  
ATOM   3416  C   CNT A 208     -23.287  -9.414   4.930  9.00  0.00           C  
ATOM   3417  C   CNT A 208     -22.435  -8.494   4.360  5.00  0.00           C  
ATOM   3418  C   CNT A 208     -21.955  -7.420   5.090  1.00  0.00           C  
ATOM   3419  C   CNT A 208     -23.896  -9.181   6.180  1.00  0.00           C  
ATOM   3420  C   CNT A 208     -23.242  -8.194   7.040  3.00  0.00           C  
ATOM   3421  C   CNT A 208     -22.239  -7.404   6.450  4.00  0.00           C  
ATOM   3422  C   CNT A 208     -21.336  -6.687   7.300  4.00  0.00           C  
ATOM   3423  C   CNT A 208     -22.974  -8.603   8.360  5.00  0.00           C  
ATOM   3424  C   CNT A 208     -21.856  -8.260   9.070  3.00  0.00           C  
ATOM   3425  C   CNT A 208     -20.931  -7.376   8.460  0.00  0.00           C  
ATOM   3426  C   CNT A 208     -19.594  -7.415   8.900  6.00  0.00           C  
ATOM   3427  C   CNT A 208     -21.357  -9.238   9.990  7.00  0.00           C  
ATOM   3428  C   CNT A 208     -20.027  -9.411  10.180  3.00  0.00           C  
ATOM   3429  C   CNT A 208     -19.074  -8.538   9.600  3.00  0.00           C  
ATOM   3430  C   CNT A 208     -17.772  -8.952   9.400  7.00  0.00           C  
ATOM   3431  C   CNT A 208     -19.577 -10.741  10.460  8.00  0.00           C  
ATOM   3432  C   CNT A 208     -18.372 -11.225   9.960  1.00  0.00           C  
ATOM   3433  C   CNT A 208     -17.427 -10.312   9.490  4.00  0.00           C  
ATOM   3434  C   CNT A 208     -16.461 -10.788   8.590  5.00  0.00           C  
ATOM   3435  C   CNT A 208     -18.291 -12.588   9.650  5.00  0.00           C  
ATOM   3436  C   CNT A 208     -17.612 -12.930   8.490  9.00  0.00           C  
ATOM   3437  C   CNT A 208     -16.663 -11.996   7.970  6.00  0.00           C  
ATOM   3438  C   CNT A 208     -16.316 -12.134   6.580  2.00  0.00           C  
ATOM   3439  C   CNT A 208     -18.063 -14.023   7.740  3.00  0.00           C  
ATOM   3440  C   CNT A 208     -17.816 -13.984   6.320  9.00  0.00           C  
ATOM   3441  C   CNT A 208     -16.902 -13.087   5.750  0.00  0.00           C  
ATOM   3442  C   CNT A 208     -16.949 -12.875   4.380  7.00  0.00           C  
ATOM   3443  C   CNT A 208     -18.725 -14.667   5.450  9.00  0.00           C  
ATOM   3444  C   CNT A 208     -19.111 -13.976   4.280  0.00  0.00           C  
ATOM   3445  C   CNT A 208     -18.173 -13.101   3.700  2.00  0.00           C  
ATOM   3446  C   CNT A 208     -18.688 -12.156   2.740  3.00  0.00           C  
ATOM   3447  C   CNT A 208     -20.441 -13.883   3.880  6.00  0.00           C  
ATOM   3448  C   CNT A 208     -20.917 -12.751   3.220  0.00  0.00           C  
ATOM   3449  C   CNT A 208     -20.052 -11.891   2.550  4.00  0.00           C  
ATOM   3450  C   CNT A 208     -20.469 -10.568   2.280  5.00  0.00           C  
ATOM   3451  C   CNT A 208     -19.604  -9.706   1.660  8.00  0.00           C  
ATOM   3452  C   CNT A 208     -19.890  -8.381   1.680  3.00  0.00           C  
ATOM   3453  C   CNT A 208     -19.014  -7.476   1.040  3.00  0.00           C  
ATOM   3454  C   CNT A 208     -19.125  -6.065   1.350  4.00  0.00           C  
ATOM   3455  C   CNT A 208     -20.826  -7.921   2.610  5.00  0.00           C  
ATOM   3456  C   CNT A 208     -20.687  -6.684   3.170  3.00  0.00           C  
ATOM   3457  C   CNT A 208     -19.862  -5.756   2.540  7.00  0.00           C  
ATOM   3458  C   CNT A 208     -19.386  -4.703   3.340  5.00  0.00           C  
ATOM   3459  C   CNT A 208     -21.040  -6.569   4.480  8.00  0.00           C  
ATOM   3460  C   CNT A 208     -20.410  -5.650   5.260  6.00  0.00           C  
ATOM   3461  C   CNT A 208     -19.511  -4.707   4.760  5.00  0.00           C  
ATOM   3462  C   CNT A 208     -18.538  -4.058   5.610  3.00  0.00           C  
ATOM   3463  C   CNT A 208     -20.387  -5.916   6.680  6.00  0.00           C  
ATOM   3464  C   CNT A 208     -19.218  -5.611   7.380  2.00  0.00           C  
ATOM   3465  C   CNT A 208     -18.274  -4.665   6.850  3.00  0.00           C  
ATOM   3466  C   CNT A 208     -16.859  -4.706   7.250  9.00  0.00           C  
ATOM   3467  C   CNT A 208     -18.708  -6.540   8.290  7.00  0.00           C  
ATOM   3468  C   CNT A 208     -17.295  -6.772   8.540  5.00  0.00           C  
ATOM   3469  C   CNT A 208     -16.332  -5.837   8.010  5.00  0.00           C  
ATOM   3470  C   CNT A 208     -14.994  -6.223   7.900  3.00  0.00           C  
ATOM   3471  C   CNT A 208     -16.874  -8.060   8.850  5.00  0.00           C  
ATOM   3472  C   CNT A 208     -15.656  -8.529   8.360  5.00  0.00           C  
ATOM   3473  C   CNT A 208     -14.748  -7.574   7.850  3.00  0.00           C  
ATOM   3474  C   CNT A 208     -13.704  -8.050   6.960  5.00  0.00           C  
ATOM   3475  C   CNT A 208     -15.475  -9.854   8.050  5.00  0.00           C  
ATOM   3476  C   CNT A 208     -14.864 -10.138   6.820  9.00  0.00           C  
ATOM   3477  C   CNT A 208     -13.915  -9.267   6.330  1.00  0.00           C  
ATOM   3478  C   CNT A 208     -13.480  -9.492   4.990  6.00  0.00           C  
ATOM   3479  C   CNT A 208     -15.429 -11.178   6.050  5.00  0.00           C  
ATOM   3480  C   CNT A 208     -15.171 -11.231   4.670  9.00  0.00           C  
ATOM   3481  C   CNT A 208     -14.301 -10.295   4.170  3.00  0.00           C  
ATOM   3482  C   CNT A 208     -14.376  -9.933   2.800  6.00  0.00           C  
ATOM   3483  C   CNT A 208     -16.117 -11.858   3.870  6.00  0.00           C  
ATOM   3484  C   CNT A 208     -16.453 -11.312   2.630  5.00  0.00           C  
ATOM   3485  C   CNT A 208     -15.566 -10.276   2.060  8.00  0.00           C  
ATOM   3486  C   CNT A 208     -15.970  -9.404   1.060  4.00  0.00           C  
ATOM   3487  C   CNT A 208     -17.750 -11.252   2.130  9.00  0.00           C  
ATOM   3488  C   CNT A 208     -18.253 -10.137   1.380  5.00  0.00           C  
ATOM   3489  C   CNT A 208     -17.331  -9.173   0.860  2.00  0.00           C  
ATOM   3490  C   CNT A 208     -17.812  -7.917   0.470  8.00  0.00           C  
ATOM   3491  C   CNT A 208     -16.879  -7.024  -0.040  3.00  0.00           C  
ATOM   3492  C   CNT A 208     -17.140  -5.678   0.020  2.00  0.00           C  
ATOM   3493  C   CNT A 208     -16.263  -4.726  -0.520  3.00  0.00           C  
ATOM   3494  C   CNT A 208     -16.373  -3.349  -0.230  0.00  0.00           C  
ATOM   3495  C   CNT A 208     -18.202  -5.179   0.810  0.00  0.00           C  
ATOM   3496  C   CNT A 208     -18.054  -3.952   1.450  3.00  0.00           C  
ATOM   3497  C   CNT A 208     -17.233  -2.950   0.850  1.00  0.00           C  
ATOM   3498  C   CNT A 208     -16.750  -1.923   1.710  0.00  0.00           C  
ATOM   3499  C   CNT A 208     -18.421  -3.753   2.770  2.00  0.00           C  
ATOM   3500  C   CNT A 208     -17.728  -2.935   3.630  1.00  0.00           C  
ATOM   3501  C   CNT A 208     -16.804  -2.017   3.080  1.00  0.00           C  
ATOM   3502  C   CNT A 208     -15.835  -1.473   3.900  4.00  0.00           C  
ATOM   3503  C   CNT A 208     -17.642  -3.178   5.010  8.00  0.00           C  
ATOM   3504  C   CNT A 208     -16.447  -2.931   5.700  9.00  0.00           C  
ATOM   3505  C   CNT A 208     -15.543  -1.990   5.210  2.00  0.00           C  
ATOM   3506  C   CNT A 208     -14.111  -1.989   5.560  3.00  0.00           C  
ATOM   3507  C   CNT A 208     -16.001  -3.851   6.660  9.00  0.00           C  
ATOM   3508  C   CNT A 208     -14.631  -4.048   6.840  2.00  0.00           C  
ATOM   3509  C   CNT A 208     -13.724  -3.162   6.300  5.00  0.00           C  
ATOM   3510  C   CNT A 208     -12.354  -3.520   6.230  3.00  0.00           C  
ATOM   3511  C   CNT A 208     -14.148  -5.283   7.270  5.00  0.00           C  
ATOM   3512  C   CNT A 208     -12.953  -5.775   6.770  7.00  0.00           C  
ATOM   3513  C   CNT A 208     -12.006  -4.885   6.270  8.00  0.00           C  
ATOM   3514  C   CNT A 208     -10.998  -5.333   5.360  0.00  0.00           C  
ATOM   3515  C   CNT A 208     -12.913  -7.086   6.280  4.00  0.00           C  
ATOM   3516  C   CNT A 208     -12.108  -7.511   5.200  4.00  0.00           C  
ATOM   3517  C   CNT A 208     -11.203  -6.535   4.630  3.00  0.00           C  
ATOM   3518  C   CNT A 208     -10.844  -6.678   3.320  4.00  0.00           C  
ATOM   3519  C   CNT A 208     -12.591  -8.564   4.440  3.00  0.00           C  
ATOM   3520  C   CNT A 208     -12.519  -8.453   3.010  4.00  0.00           C  
ATOM   3521  C   CNT A 208     -11.629  -7.469   2.460  8.00  0.00           C  
ATOM   3522  C   CNT A 208     -11.655  -7.234   1.100  1.00  0.00           C  
ATOM   3523  C   CNT A 208     -13.429  -9.055   2.200  8.00  0.00           C  
ATOM   3524  C   CNT A 208     -13.703  -8.474   0.930  7.00  0.00           C  
ATOM   3525  C   CNT A 208     -12.867  -7.498   0.400  3.00  0.00           C  
ATOM   3526  C   CNT A 208     -13.274  -6.680  -0.570  6.00  0.00           C  
ATOM   3527  C   CNT A 208     -15.054  -8.506   0.500  6.00  0.00           C  
ATOM   3528  C   CNT A 208     -15.491  -7.414  -0.330  5.00  0.00           C  
ATOM   3529  C   CNT A 208     -14.611  -6.486  -0.750  6.00  0.00           C  
ATOM   3530  C   CNT A 208     -15.018  -5.165  -1.020  9.00  0.00           C  
ATOM   3531  C   CNT A 208     -14.139  -4.219  -1.550  4.00  0.00           C  
ATOM   3532  C   CNT A 208     -14.498  -2.855  -1.600  5.00  0.00           C  
ATOM   3533  C   CNT A 208     -13.550  -1.968  -2.180  7.00  0.00           C  
ATOM   3534  C   CNT A 208     -13.608  -0.583  -1.870  7.00  0.00           C  
ATOM   3535  C   CNT A 208     -15.520  -2.356  -0.770  3.00  0.00           C  
ATOM   3536  C   CNT A 208     -15.429  -1.090  -0.200  5.00  0.00           C  
ATOM   3537  C   CNT A 208     -14.391  -0.216  -0.750  1.00  0.00           C  
ATOM   3538  C   CNT A 208     -13.857   0.824   0.070  3.00  0.00           C  
ATOM   3539  C   CNT A 208     -15.807  -0.969   1.170  5.00  0.00           C  
ATOM   3540  C   CNT A 208     -14.964  -0.203   1.960  5.00  0.00           C  
ATOM   3541  C   CNT A 208     -14.100   0.713   1.400  2.00  0.00           C  
ATOM   3542  C   CNT A 208     -13.163   1.349   2.240  7.00  0.00           C  
ATOM   3543  C   CNT A 208     -14.821  -0.666   3.320  0.00  0.00           C  
ATOM   3544  C   CNT A 208     -13.654  -0.264   4.000  8.00  0.00           C  
ATOM   3545  C   CNT A 208     -12.764   0.651   3.420  1.00  0.00           C  
ATOM   3546  C   CNT A 208     -11.487   0.651   3.860  3.00  0.00           C  
ATOM   3547  C   CNT A 208     -13.236  -1.100   5.080  2.00  0.00           C  
ATOM   3548  C   CNT A 208     -11.894  -1.355   5.200  2.00  0.00           C  
ATOM   3549  C   CNT A 208     -10.956  -0.465   4.550  4.00  0.00           C  
ATOM   3550  C   CNT A 208      -9.632  -0.843   4.430  0.00  0.00           C  
ATOM   3551  C   CNT A 208     -11.436  -2.637   5.620  8.00  0.00           C  
ATOM   3552  C   CNT A 208     -10.215  -3.101   5.070  7.00  0.00           C  
ATOM   3553  C   CNT A 208      -9.336  -2.249   4.500  1.00  0.00           C  
ATOM   3554  C   CNT A 208      -8.312  -2.731   3.670  0.00  0.00           C  
ATOM   3555  C   CNT A 208     -10.055  -4.482   4.760  5.00  0.00           C  
ATOM   3556  C   CNT A 208      -9.387  -4.821   3.550  5.00  0.00           C  
ATOM   3557  C   CNT A 208      -8.397  -3.992   3.090  2.00  0.00           C  
ATOM   3558  C   CNT A 208      -8.005  -4.134   1.710  4.00  0.00           C  
ATOM   3559  C   CNT A 208      -9.864  -5.860   2.740  9.00  0.00           C  
ATOM   3560  C   CNT A 208      -9.762  -5.805   1.360  5.00  0.00           C  
ATOM   3561  C   CNT A 208      -8.805  -4.932   0.820  9.00  0.00           C  
ATOM   3562  C   CNT A 208      -8.889  -4.605  -0.540  4.00  0.00           C  
ATOM   3563  C   CNT A 208     -10.731  -6.370   0.530  4.00  0.00           C  
ATOM   3564  C   CNT A 208     -11.077  -5.763  -0.660  4.00  0.00           C  
ATOM   3565  C   CNT A 208     -10.129  -4.861  -1.180  6.00  0.00           C  
ATOM   3566  C   CNT A 208     -10.541  -3.976  -2.190  5.00  0.00           C  
ATOM   3567  C   CNT A 208     -12.392  -5.712  -1.080  4.00  0.00           C  
ATOM   3568  C   CNT A 208     -12.845  -4.593  -1.800  5.00  0.00           C  
ATOM   3569  C   CNT A 208     -11.925  -3.714  -2.280  5.00  0.00           C  
ATOM   3570  C   CNT A 208     -12.371  -2.427  -2.740  4.00  0.00           C  
ATOM   3571  C   CNT A 208     -11.450  -1.544  -3.300  9.00  0.00           C  
ATOM   3572  C   CNT A 208     -11.758  -0.143  -3.290  6.00  0.00           C  
ATOM   3573  C   CNT A 208     -10.728   0.731  -3.760  7.00  0.00           C  
ATOM   3574  C   CNT A 208     -10.816   2.084  -3.410  9.00  0.00           C  
ATOM   3575  C   CNT A 208     -12.664   0.302  -2.380  0.00  0.00           C  
ATOM   3576  C   CNT A 208     -12.492   1.561  -1.790  8.00  0.00           C  
ATOM   3577  C   CNT A 208     -11.567   2.473  -2.300  6.00  0.00           C  
ATOM   3578  C   CNT A 208     -11.150   3.605  -1.520  9.00  0.00           C  
ATOM   3579  C   CNT A 208     -13.035   1.827  -0.470  9.00  0.00           C  
ATOM   3580  C   CNT A 208     -12.333   2.706   0.400  5.00  0.00           C  
ATOM   3581  C   CNT A 208     -11.349   3.519  -0.140  7.00  0.00           C  
ATOM   3582  C   CNT A 208     -10.374   4.098   0.650  1.00  0.00           C  
ATOM   3583  C   CNT A 208     -12.234   2.340   1.780  1.00  0.00           C  
ATOM   3584  C   CNT A 208     -10.954   2.535   2.410  5.00  0.00           C  
ATOM   3585  C   CNT A 208     -10.036   3.413   1.870  2.00  0.00           C  
ATOM   3586  C   CNT A 208      -8.666   3.318   2.150  8.00  0.00           C  
ATOM   3587  C   CNT A 208     -10.539   1.606   3.430  6.00  0.00           C  
ATOM   3588  C   CNT A 208      -9.128   1.302   3.490  9.00  0.00           C  
ATOM   3589  C   CNT A 208      -8.244   2.186   2.900  8.00  0.00           C  
ATOM   3590  C   CNT A 208      -6.923   1.775   2.640  1.00  0.00           C  
ATOM   3591  C   CNT A 208      -8.667   0.072   3.870  7.00  0.00           C  
ATOM   3592  C   CNT A 208      -7.460  -0.466   3.380  4.00  0.00           C  
ATOM   3593  C   CNT A 208      -6.614   0.430   2.700  7.00  0.00           C  
ATOM   3594  C   CNT A 208      -5.546   0.013   1.880  9.00  0.00           C  
ATOM   3595  C   CNT A 208      -7.392  -1.827   3.070  4.00  0.00           C  
ATOM   3596  C   CNT A 208      -6.604  -2.151   1.890  1.00  0.00           C  
ATOM   3597  C   CNT A 208      -5.660  -1.301   1.330  4.00  0.00           C  
ATOM   3598  C   CNT A 208      -5.214  -1.521   0.000  8.00  0.00           C  
ATOM   3599  C   CNT A 208      -7.014  -3.277   1.160  3.00  0.00           C  
ATOM   3600  C   CNT A 208      -6.916  -3.219  -0.270  3.00  0.00           C  
ATOM   3601  C   CNT A 208      -6.062  -2.205  -0.850  1.00  0.00           C  
ATOM   3602  C   CNT A 208      -6.262  -1.792  -2.190  2.00  0.00           C  
ATOM   3603  C   CNT A 208      -7.938  -3.761  -1.070  4.00  0.00           C  
ATOM   3604  C   CNT A 208      -8.294  -3.098  -2.270  3.00  0.00           C  
ATOM   3605  C   CNT A 208      -7.352  -2.199  -2.930  1.00  0.00           C  
ATOM   3606  C   CNT A 208      -7.797  -1.288  -3.920  5.00  0.00           C  
ATOM   3607  C   CNT A 208      -9.611  -3.002  -2.720  4.00  0.00           C  
ATOM   3608  C   CNT A 208     -10.086  -1.889  -3.410  8.00  0.00           C  
ATOM   3609  C   CNT A 208      -9.181  -1.042  -4.080  9.00  0.00           C  
ATOM   3610  C   CNT A 208      -9.561   0.258  -4.380  7.00  0.00           C  
ATOM   3611  C   CNT A 208      -8.642   1.151  -4.970  1.00  0.00           C  
ATOM   3612  C   CNT A 208      -8.912   2.510  -4.910  6.00  0.00           C  
ATOM   3613  C   CNT A 208      -8.004   3.422  -5.420  1.00  0.00           C  
ATOM   3614  C   CNT A 208      -8.048   4.788  -5.050  4.00  0.00           C  
ATOM   3615  C   CNT A 208      -9.879   2.942  -3.970  8.00  0.00           C  
ATOM   3616  C   CNT A 208      -9.677   4.156  -3.350  7.00  0.00           C  
ATOM   3617  C   CNT A 208      -8.769   5.106  -3.920  5.00  0.00           C  
ATOM   3618  C   CNT A 208      -8.474   6.271  -3.200  9.00  0.00           C  
ATOM   3619  C   CNT A 208     -10.133   4.388  -2.090  1.00  0.00           C  
ATOM   3620  C   CNT A 208      -9.543   5.334  -1.210  2.00  0.00           C  
ATOM   3621  C   CNT A 208      -8.599   6.222  -1.770  1.00  0.00           C  
ATOM   3622  C   CNT A 208      -7.525   6.708  -1.010  3.00  0.00           C  
ATOM   3623  C   CNT A 208      -9.429   4.965   0.100  9.00  0.00           C  
ATOM   3624  C   CNT A 208      -8.216   5.186   0.720  3.00  0.00           C  
ATOM   3625  C   CNT A 208      -7.261   6.073   0.220  7.00  0.00           C  
ATOM   3626  C   CNT A 208      -5.936   6.008   0.560  0.00  0.00           C  
ATOM   3627  C   CNT A 208      -7.775   4.248   1.660  7.00  0.00           C  
ATOM   3628  C   CNT A 208      -6.405   3.998   1.760  9.00  0.00           C  
ATOM   3629  C   CNT A 208      -5.463   4.950   1.290  7.00  0.00           C  
ATOM   3630  C   CNT A 208      -4.139   4.494   1.170  6.00  0.00           C  
ATOM   3631  C   CNT A 208      -5.966   2.706   2.150  5.00  0.00           C  
ATOM   3632  C   CNT A 208      -4.721   2.211   1.670  9.00  0.00           C  
ATOM   3633  C   CNT A 208      -3.743   3.138   1.280  7.00  0.00           C  
ATOM   3634  C   CNT A 208      -2.713   2.625   0.430  9.00  0.00           C  
ATOM   3635  C   CNT A 208      -4.541   0.862   1.390  2.00  0.00           C  
ATOM   3636  C   CNT A 208      -3.799   0.468   0.300  6.00  0.00           C  
ATOM   3637  C   CNT A 208      -2.849   1.389  -0.260  0.00  0.00           C  
ATOM   3638  C   CNT A 208      -2.559   1.285  -1.630  2.00  0.00           C  
ATOM   3639  C   CNT A 208      -4.320  -0.584  -0.520  1.00  0.00           C  
ATOM   3640  C   CNT A 208      -4.237  -0.405  -1.880  0.00  0.00           C  
ATOM   3641  C   CNT A 208      -3.332   0.451  -2.460  1.00  0.00           C  
ATOM   3642  C   CNT A 208      -3.413   0.808  -3.820  6.00  0.00           C  
ATOM   3643  C   CNT A 208      -5.310  -0.938  -2.710  9.00  0.00           C  
ATOM   3644  C   CNT A 208      -5.603  -0.333  -3.910  1.00  0.00           C  
ATOM   3645  C   CNT A 208      -4.598   0.544  -4.530  2.00  0.00           C  
ATOM   3646  C   CNT A 208      -5.035   1.382  -5.500  7.00  0.00           C  
ATOM   3647  C   CNT A 208      -6.899  -0.320  -4.380  0.00  0.00           C  
ATOM   3648  C   CNT A 208      -7.334   0.713  -5.180  6.00  0.00           C  
ATOM   3649  C   CNT A 208      -6.409   1.634  -5.740  4.00  0.00           C  
ATOM   3650  C   CNT A 208      -6.839   2.953  -6.040  4.00  0.00           C  
ATOM   3651  C   CNT A 208      -5.927   3.831  -6.590  6.00  0.00           C  
ATOM   3652  C   CNT A 208      -6.196   5.229  -6.540  3.00  0.00           C  
ATOM   3653  C   CNT A 208      -5.338   6.117  -7.090  2.00  0.00           C  
ATOM   3654  C   CNT A 208      -5.458   7.501  -6.850  2.00  0.00           C  
ATOM   3655  C   CNT A 208      -7.196   5.675  -5.680  6.00  0.00           C  
ATOM   3656  C   CNT A 208      -7.082   6.981  -5.100  8.00  0.00           C  
ATOM   3657  C   CNT A 208      -6.259   7.905  -5.730  5.00  0.00           C  
ATOM   3658  C   CNT A 208      -5.685   8.947  -4.940  6.00  0.00           C  
ATOM   3659  C   CNT A 208      -7.502   7.115  -3.720  8.00  0.00           C  
ATOM   3660  C   CNT A 208      -6.769   8.017  -2.910  8.00  0.00           C  
ATOM   3661  C   CNT A 208      -5.895   8.909  -3.520  6.00  0.00           C  
ATOM   3662  C   CNT A 208      -4.854   9.424  -2.690  4.00  0.00           C  
ATOM   3663  C   CNT A 208      -6.687   7.745  -1.500  8.00  0.00           C  
ATOM   3664  C   CNT A 208      -5.424   7.952  -0.830  6.00  0.00           C  
ATOM   3665  C   CNT A 208      -4.526   8.758  -1.480  6.00  0.00           C  
ATOM   3666  C   CNT A 208      -3.173   8.768  -1.040  0.00  0.00           C  
ATOM   3667  C   CNT A 208      -5.032   6.956   0.080  5.00  0.00           C  
ATOM   3668  C   CNT A 208      -3.665   6.689   0.200  9.00  0.00           C  
ATOM   3669  C   CNT A 208      -2.736   7.612  -0.330  8.00  0.00           C  
ATOM   3670  C   CNT A 208      -1.390   7.281  -0.340  8.00  0.00           C  
ATOM   3671  C   CNT A 208      -3.267   5.432   0.600  3.00  0.00           C  
ATOM   3672  C   CNT A 208      -2.032   4.985   0.090  7.00  0.00           C  
ATOM   3673  C   CNT A 208      -1.092   5.895  -0.330  9.00  0.00           C  
ATOM   3674  C   CNT A 208      -0.140   5.498  -1.310  1.00  0.00           C  
ATOM   3675  C   CNT A 208      -1.813   3.615  -0.110  6.00  0.00           C  
ATOM   3676  C   CNT A 208      -1.218   3.360  -1.370  3.00  0.00           C  
ATOM   3677  C   CNT A 208      -0.352   4.274  -1.920  8.00  0.00           C  
ATOM   3678  C   CNT A 208       0.081   4.142  -3.310  1.00  0.00           C  
ATOM   3679  C   CNT A 208      -1.718   2.294  -2.170  9.00  0.00           C  
ATOM   3680  C   CNT A 208      -1.467   2.229  -3.590  0.00  0.00           C  
ATOM   3681  C   CNT A 208      -0.589   3.168  -4.110  1.00  0.00           C  
ATOM   3682  C   CNT A 208      -0.729   3.472  -5.490  4.00  0.00           C  
ATOM   3683  C   CNT A 208      -2.523   1.781  -4.370  8.00  0.00           C  
ATOM   3684  C   CNT A 208      -2.818   2.247  -5.670  7.00  0.00           C  
ATOM   3685  C   CNT A 208      -1.924   3.201  -6.250  2.00  0.00           C  
ATOM   3686  C   CNT A 208      -2.356   4.079  -7.270  9.00  0.00           C  
ATOM   3687  C   CNT A 208      -4.127   2.299  -6.090  0.00  0.00           C  
ATOM   3688  C   CNT A 208      -4.637   3.369  -6.870  9.00  0.00           C  
ATOM   3689  C   CNT A 208      -3.731   4.351  -7.350  8.00  0.00           C  
ATOM   3690  C   CNT A 208      -4.139   5.640  -7.600  1.00  0.00           C  
ATOM   3691  C   CNT A 208      -3.264   6.555  -8.260  5.00  0.00           C  
ATOM   3692  C   CNT A 208      -3.560   7.921  -8.290  3.00  0.00           C  
ATOM   3693  C   CNT A 208      -2.684   8.846  -8.850  1.00  0.00           C  
ATOM   3694  C   CNT A 208      -2.785  10.205  -8.560  4.00  0.00           C  
ATOM   3695  C   CNT A 208      -4.504   8.395  -7.380  0.00  0.00           C  
ATOM   3696  C   CNT A 208      -4.400   9.722  -6.800  1.00  0.00           C  
ATOM   3697  C   CNT A 208      -3.484  10.633  -7.390  7.00  0.00           C  
ATOM   3698  C   CNT A 208      -2.962  11.634  -6.610  0.00  0.00           C  
ATOM   3699  C   CNT A 208      -4.775   9.824  -5.480  7.00  0.00           C  
ATOM   3700  C   CNT A 208      -3.995  10.581  -4.660  5.00  0.00           C  
ATOM   3701  C   CNT A 208      -3.066  11.514  -5.210  0.00  0.00           C  
ATOM   3702  C   CNT A 208      -2.014  11.939  -4.390  3.00  0.00           C  
ATOM   3703  C   CNT A 208      -3.920  10.284  -3.260  7.00  0.00           C  
ATOM   3704  C   CNT A 208      -2.715  10.591  -2.540  6.00  0.00           C  
ATOM   3705  C   CNT A 208      -1.791  11.479  -3.120  4.00  0.00           C  
ATOM   3706  C   CNT A 208      -0.494  11.530  -2.540  3.00  0.00           C  
ATOM   3707  C   CNT A 208      -2.248   9.595  -1.620  0.00  0.00           C  
ATOM   3708  C   CNT A 208      -0.911   9.516  -1.270  1.00  0.00           C  
ATOM   3709  C   CNT A 208      -0.017  10.428  -1.820  9.00  0.00           C  
ATOM   3710  C   CNT A 208       1.297   9.981  -2.090  0.00  0.00           C  
ATOM   3711  C   CNT A 208      -0.438   8.212  -0.900  1.00  0.00           C  
ATOM   3712  C   CNT A 208       0.717   7.755  -1.520  1.00  0.00           C  
ATOM   3713  C   CNT A 208       1.582   8.640  -2.140  8.00  0.00           C  
ATOM   3714  C   CNT A 208       2.560   8.122  -3.060  8.00  0.00           C  
ATOM   3715  C   CNT A 208       0.752   6.442  -1.940  7.00  0.00           C  
ATOM   3716  C   CNT A 208       1.434   6.024  -3.060  6.00  0.00           C  
ATOM   3717  C   CNT A 208       2.427   6.838  -3.600  2.00  0.00           C  
ATOM   3718  C   CNT A 208       2.921   6.638  -4.900  6.00  0.00           C  
ATOM   3719  C   CNT A 208       0.977   5.004  -3.870  4.00  0.00           C  
ATOM   3720  C   CNT A 208       1.256   4.902  -5.230  6.00  0.00           C  
ATOM   3721  C   CNT A 208       2.220   5.796  -5.790  9.00  0.00           C  
ATOM   3722  C   CNT A 208       1.919   6.304  -7.070  4.00  0.00           C  
ATOM   3723  C   CNT A 208       0.189   4.351  -6.060  1.00  0.00           C  
ATOM   3724  C   CNT A 208      -0.179   5.088  -7.210  6.00  0.00           C  
ATOM   3725  C   CNT A 208       0.733   6.051  -7.740  1.00  0.00           C  
ATOM   3726  C   CNT A 208       0.348   6.918  -8.770  0.00  0.00           C  
ATOM   3727  C   CNT A 208      -1.465   5.098  -7.740  1.00  0.00           C  
ATOM   3728  C   CNT A 208      -1.958   6.146  -8.550  3.00  0.00           C  
ATOM   3729  C   CNT A 208      -1.041   7.085  -9.070  6.00  0.00           C  
ATOM   3730  C   CNT A 208      -1.507   8.375  -9.420  9.00  0.00           C  
ATOM   3731  C   CNT A 208      -0.577   9.256  -9.950  6.00  0.00           C  
ATOM   3732  C   CNT A 208      -0.812  10.677  -9.920  4.00  0.00           C  
ATOM   3733  C   CNT A 208       0.106  11.498 -10.470  4.00  0.00           C  
ATOM   3734  C   CNT A 208       0.066  12.861 -10.150  1.00  0.00           C  
ATOM   3735  C   CNT A 208      -1.880  11.132  -9.090  4.00  0.00           C  
ATOM   3736  C   CNT A 208      -1.616  12.401  -8.500  7.00  0.00           C  
ATOM   3737  C   CNT A 208      -0.579  13.186  -8.940  5.00  0.00           C  
ATOM   3738  C   CNT A 208      -0.125  14.254  -8.220  6.00  0.00           C  
ATOM   3739  C   CNT A 208      -2.056  12.548  -7.150  2.00  0.00           C  
ATOM   3740  C   CNT A 208      -1.297  13.340  -6.270  4.00  0.00           C  
ATOM   3741  C   CNT A 208      -0.322  14.249  -6.850  0.00  0.00           C  
ATOM   3742  C   CNT A 208       0.629  14.816  -5.920  5.00  0.00           C  
ATOM   3743  C   CNT A 208      -1.162  12.964  -4.910  9.00  0.00           C  
ATOM   3744  C   CNT A 208      -0.020  13.267  -4.140  6.00  0.00           C  
ATOM   3745  C   CNT A 208       0.844  14.216  -4.670  3.00  0.00           C  
ATOM   3746  C   CNT A 208       2.219  14.210  -4.160  3.00  0.00           C  
ATOM   3747  C   CNT A 208       0.435  12.452  -3.090  7.00  0.00           C  
ATOM   3748  C   CNT A 208       1.781  12.170  -2.940  6.00  0.00           C  
ATOM   3749  C   CNT A 208       2.653  13.087  -3.440  4.00  0.00           C  
ATOM   3750  C   CNT A 208       3.994  12.725  -3.610  8.00  0.00           C  
ATOM   3751  C   CNT A 208       2.237  10.895  -2.560  9.00  0.00           C  
ATOM   3752  C   CNT A 208       3.477  10.401  -3.070  3.00  0.00           C  
ATOM   3753  C   CNT A 208       4.334  11.352  -3.580  0.00  0.00           C  
ATOM   3754  C   CNT A 208       5.225  10.908  -4.530  2.00  0.00           C  
ATOM   3755  C   CNT A 208       3.509   9.069  -3.500  8.00  0.00           C  
ATOM   3756  C   CNT A 208       4.130   8.782  -4.690  9.00  0.00           C  
ATOM   3757  C   CNT A 208       5.052   9.711  -5.160  6.00  0.00           C  
ATOM   3758  C   CNT A 208       5.480   9.533  -6.460  3.00  0.00           C  
ATOM   3759  C   CNT A 208       3.755   7.650  -5.450  5.00  0.00           C  
ATOM   3760  C   CNT A 208       3.927   7.669  -6.850  3.00  0.00           C  
ATOM   3761  C   CNT A 208       4.830   8.665  -7.350  0.00  0.00           C  
ATOM   3762  C   CNT A 208       4.635   9.088  -8.660  5.00  0.00           C  
ATOM   3763  C   CNT A 208       2.871   7.185  -7.630  2.00  0.00           C  
ATOM   3764  C   CNT A 208       2.545   7.927  -8.770  3.00  0.00           C  
ATOM   3765  C   CNT A 208       3.466   8.741  -9.380  7.00  0.00           C  
ATOM   3766  C   CNT A 208       3.115   9.443 -10.540  6.00  0.00           C  
ATOM   3767  C   CNT A 208       1.251   7.810  -9.290  8.00  0.00           C  
ATOM   3768  C   CNT A 208       0.790   8.847 -10.120  2.00  0.00           C  
ATOM   3769  C   CNT A 208       1.745   9.701 -10.690  2.00  0.00           C  
ATOM   3770  C   CNT A 208       1.336  10.995 -11.060  3.00  0.00           C  
ATOM   3771  C   CNT A 208       2.249  11.867 -11.650  9.00  0.00           C  
ATOM   3772  C   CNT A 208       1.877  13.262 -11.690  7.00  0.00           C  
ATOM   3773  C   CNT A 208       2.791  14.198 -12.190  5.00  0.00           C  
ATOM   3774  C   CNT A 208       2.806  15.501 -11.760  7.00  0.00           C  
ATOM   3775  C   CNT A 208       0.982  13.745 -10.720  1.00  0.00           C  
ATOM   3776  C   CNT A 208       1.276  14.987 -10.060  4.00  0.00           C  
ATOM   3777  C   CNT A 208       2.181  15.861 -10.570  5.00  0.00           C  
ATOM   3778  C   CNT A 208       2.591  16.927  -9.770  3.00  0.00           C  
ATOM   3779  C   CNT A 208       0.833  15.161  -8.750  4.00  0.00           C  
ATOM   3780  C   CNT A 208       1.438  16.031  -7.850  1.00  0.00           C  
ATOM   3781  C   CNT A 208       2.370  16.893  -8.380  8.00  0.00           C  
ATOM   3782  C   CNT A 208       3.299  17.558  -7.520  5.00  0.00           C  
ATOM   3783  C   CNT A 208       1.605  15.721  -6.480  1.00  0.00           C  
ATOM   3784  C   CNT A 208       2.670  16.087  -5.750  3.00  0.00           C  
ATOM   3785  C   CNT A 208       3.607  16.982  -6.270  3.00  0.00           C  
ATOM   3786  C   CNT A 208       4.876  17.075  -5.760  6.00  0.00           C  
ATOM   3787  C   CNT A 208       3.082  15.254  -4.670  0.00  0.00           C  
ATOM   3788  C   CNT A 208       4.428  15.000  -4.520  5.00  0.00           C  
ATOM   3789  C   CNT A 208       5.403  15.955  -4.990  5.00  0.00           C  
ATOM   3790  C   CNT A 208       6.783  15.576  -5.140  6.00  0.00           C  
ATOM   3791  C   CNT A 208       4.827  13.714  -4.230  0.00  0.00           C  
ATOM   3792  C   CNT A 208       6.083  13.218  -4.730  9.00  0.00           C  
ATOM   3793  C   CNT A 208       6.961  14.181  -5.250  3.00  0.00           C  
ATOM   3794  C   CNT A 208       7.897  13.731  -6.230  7.00  0.00           C  
ATOM   3795  C   CNT A 208       6.149  11.815  -5.070  0.00  0.00           C  
ATOM   3796  C   CNT A 208       6.900  11.495  -6.230  1.00  0.00           C  
ATOM   3797  C   CNT A 208       7.660  12.476  -6.820  7.00  0.00           C  
ATOM   3798  C   CNT A 208       8.100  12.294  -8.120  2.00  0.00           C  
ATOM   3799  C   CNT A 208       6.430  10.418  -6.970  2.00  0.00           C  
ATOM   3800  C   CNT A 208       6.538  10.521  -8.350  4.00  0.00           C  
ATOM   3801  C   CNT A 208       7.441  11.424  -8.940  4.00  0.00           C  
ATOM   3802  C   CNT A 208       7.445  11.694 -10.290  5.00  0.00           C  
ATOM   3803  C   CNT A 208       5.618   9.907  -9.210  4.00  0.00           C  
ATOM   3804  C   CNT A 208       5.362  10.554 -10.430  6.00  0.00           C  
ATOM   3805  C   CNT A 208       6.301  11.339 -11.020  1.00  0.00           C  
ATOM   3806  C   CNT A 208       5.920  12.225 -12.030  3.00  0.00           C  
ATOM   3807  C   CNT A 208       4.069  10.356 -11.010  6.00  0.00           C  
ATOM   3808  C   CNT A 208       3.614  11.509 -11.680  9.00  0.00           C  
ATOM   3809  C   CNT A 208       4.558  12.470 -12.170  3.00  0.00           C  
ATOM   3810  C   CNT A 208       4.092  13.715 -12.610  1.00  0.00           C  
ATOM   3811  C   CNT A 208       5.050  14.581 -13.200  5.00  0.00           C  
ATOM   3812  C   CNT A 208       4.800  15.983 -13.140  3.00  0.00           C  
ATOM   3813  C   CNT A 208       5.777  16.849 -13.610  6.00  0.00           C  
ATOM   3814  C   CNT A 208       5.725  18.208 -13.240  3.00  0.00           C  
ATOM   3815  C   CNT A 208       3.845  16.382 -12.290  3.00  0.00           C  
ATOM   3816  C   CNT A 208       4.004  17.597 -11.630  3.00  0.00           C  
ATOM   3817  C   CNT A 208       4.874  18.521 -12.190  9.00  0.00           C  
ATOM   3818  C   CNT A 208       5.198  19.671 -11.420  1.00  0.00           C  
ATOM   3819  C   CNT A 208       3.509  17.870 -10.360  3.00  0.00           C  
ATOM   3820  C   CNT A 208       4.270  18.698  -9.480  5.00  0.00           C  
ATOM   3821  C   CNT A 208       5.053  19.708 -10.060  5.00  0.00           C  
ATOM   3822  C   CNT A 208       5.969  20.373  -9.190  8.00  0.00           C  
ATOM   3823  C   CNT A 208       4.260  18.352  -8.180  7.00  0.00           C  
ATOM   3824  C   CNT A 208       5.386  18.767  -7.420  2.00  0.00           C  
ATOM   3825  C   CNT A 208       6.332  19.706  -7.990  6.00  0.00           C  
ATOM   3826  C   CNT A 208       7.665  19.682  -7.630  8.00  0.00           C  
ATOM   3827  C   CNT A 208       5.789  17.899  -6.400  7.00  0.00           C  
ATOM   3828  C   CNT A 208       7.172  17.714  -6.270  0.00  0.00           C  
ATOM   3829  C   CNT A 208       8.121  18.570  -6.870  2.00  0.00           C  
ATOM   3830  C   CNT A 208       9.439  18.187  -7.070  1.00  0.00           C  
ATOM   3831  C   CNT A 208       7.625  16.465  -5.820  3.00  0.00           C  
ATOM   3832  C   CNT A 208       8.839  15.972  -6.370  1.00  0.00           C  
ATOM   3833  C   CNT A 208       9.741  16.856  -6.940  5.00  0.00           C  
ATOM   3834  C   CNT A 208      10.774  16.324  -7.760  9.00  0.00           C  
ATOM   3835  C   CNT A 208       8.909  14.580  -6.650  9.00  0.00           C  
ATOM   3836  C   CNT A 208       9.623  14.223  -7.810  1.00  0.00           C  
ATOM   3837  C   CNT A 208      10.608  15.067  -8.400  2.00  0.00           C  
ATOM   3838  C   CNT A 208      11.094  14.804  -9.690  7.00  0.00           C  
ATOM   3839  C   CNT A 208       9.069  13.139  -8.580  4.00  0.00           C  
ATOM   3840  C   CNT A 208       9.289  13.177  -9.970  3.00  0.00           C  
ATOM   3841  C   CNT A 208      10.278  14.033 -10.490  8.00  0.00           C  
ATOM   3842  C   CNT A 208      10.296  14.283 -11.890  6.00  0.00           C  
ATOM   3843  C   CNT A 208       8.407  12.580 -10.850  5.00  0.00           C  
ATOM   3844  C   CNT A 208       8.155  13.123 -12.150  7.00  0.00           C  
ATOM   3845  C   CNT A 208       9.040  14.090 -12.600  2.00  0.00           C  
ATOM   3846  C   CNT A 208       8.727  14.878 -13.750  5.00  0.00           C  
ATOM   3847  C   CNT A 208       6.861  13.041 -12.680  7.00  0.00           C  
ATOM   3848  C   CNT A 208       6.375  14.091 -13.460  7.00  0.00           C  
ATOM   3849  C   CNT A 208       7.280  15.026 -14.010  6.00  0.00           C  
ATOM   3850  C   CNT A 208       6.909  16.364 -14.230  4.00  0.00           C  
ATOM   3851  C   CNT A 208       7.834  17.311 -14.720  0.00  0.00           C  
ATOM   3852  C   CNT A 208       7.461  18.696 -14.760  6.00  0.00           C  
ATOM   3853  C   CNT A 208       8.388  19.637 -15.340  9.00  0.00           C  
ATOM   3854  C   CNT A 208       8.020  20.990 -15.070  6.00  0.00           C  
ATOM   3855  C   CNT A 208       6.451  19.215 -13.870  4.00  0.00           C  
ATOM   3856  C   CNT A 208       6.603  20.468 -13.260  7.00  0.00           C  
ATOM   3857  C   CNT A 208       7.342  21.483 -13.940  8.00  0.00           C  
ATOM   3858  C   CNT A 208       7.405  22.740 -13.240  1.00  0.00           C  
ATOM   3859  C   CNT A 208       6.086  20.615 -12.000  0.00  0.00           C  
ATOM   3860  C   CNT A 208       6.725  21.578 -11.160  1.00  0.00           C  
ATOM   3861  C   CNT A 208       7.479  22.616 -11.770  0.00  0.00           C  
ATOM   3862  C   CNT A 208       8.483  23.160 -10.850  2.00  0.00           C  
ATOM   3863  C   CNT A 208       6.911  21.301  -9.800  7.00  0.00           C  
ATOM   3864  C   CNT A 208       8.165  21.513  -9.130  1.00  0.00           C  
ATOM   3865  C   CNT A 208       9.001  22.374  -9.790  4.00  0.00           C  
ATOM   3866  C   CNT A 208      10.375  22.173  -9.470  3.00  0.00           C  
ATOM   3867  C   CNT A 208       8.590  20.610  -8.200  5.00  0.00           C  
ATOM   3868  C   CNT A 208       9.985  20.325  -8.010  0.00  0.00           C  
ATOM   3869  C   CNT A 208      10.907  21.222  -8.520  8.00  0.00           C  
ATOM   3870  C   CNT A 208      12.262  20.931  -8.370  4.00  0.00           C  
ATOM   3871  C   CNT A 208      10.415  19.048  -7.530  5.00  0.00           C  
ATOM   3872  C   CNT A 208      11.703  18.574  -7.880  2.00  0.00           C  
ATOM   3873  C   CNT A 208      12.670  19.541  -8.450  7.00  0.00           C  
ATOM   3874  C   CNT A 208      13.632  18.921  -9.350  2.00  0.00           C  
ATOM   3875  C   CNT A 208      11.837  17.196  -8.330  8.00  0.00           C  
ATOM   3876  C   CNT A 208      12.502  16.890  -9.530  1.00  0.00           C  
ATOM   3877  C   CNT A 208      13.434  17.745 -10.090  1.00  0.00           C  
ATOM   3878  C   CNT A 208      13.936  17.315 -11.330  5.00  0.00           C  
ATOM   3879  C   CNT A 208      12.011  15.780 -10.290  2.00  0.00           C  
ATOM   3880  C   CNT A 208      12.253  15.734 -11.670  5.00  0.00           C  
ATOM   3881  C   CNT A 208      13.251  16.514 -12.250  7.00  0.00           C  
ATOM   3882  C   CNT A 208      13.247  16.567 -13.690  7.00  0.00           C  
ATOM   3883  C   CNT A 208      11.220  15.192 -12.430  0.00  0.00           C  
ATOM   3884  C   CNT A 208      10.988  15.849 -13.710  5.00  0.00           C  
ATOM   3885  C   CNT A 208      11.976  16.680 -14.290  8.00  0.00           C  
ATOM   3886  C   CNT A 208      11.466  17.541 -15.270  1.00  0.00           C  
ATOM   3887  C   CNT A 208       9.667  15.836 -14.240  3.00  0.00           C  
ATOM   3888  C   CNT A 208       9.157  16.931 -14.980  7.00  0.00           C  
ATOM   3889  C   CNT A 208      10.072  17.836 -15.530  8.00  0.00           C  
ATOM   3890  C   CNT A 208       9.532  19.058 -15.920  3.00  0.00           C  
ATOM   3891  N   LIG A 209     -42.197 -26.577  13.930  9.00  0.00           N  
ATOM   3892  N   LIG A 209     -34.069 -31.839  19.530  5.00  0.00           N  
ATOM   3893  N   LIG A 209       7.730  24.944 -12.850  5.00  0.00           N  
ATOM   3894  N   LIG A 209      14.088  16.457 -15.850  6.00  0.00           N  
ATOM   3895  C   LIG A 209     -41.391 -27.611  13.390  2.00  0.00           C  
ATOM   3896  C   LIG A 209     -34.255 -32.011  18.200  2.00  0.00           C  
ATOM   3897  C   LIG A 209       7.699  24.077 -13.920  9.00  0.00           C  
ATOM   3898  C   LIG A 209      14.570  16.631 -14.560  1.00  0.00           C  
ATOM   3899  O   LIG A 209     -41.314 -28.647  12.880  7.00  0.00           O  
ATOM   3900  O   LIG A 209     -34.590 -32.719  17.300  8.00  0.00           O  
ATOM   3901  O   LIG A 209       7.770  23.815 -15.080  4.00  0.00           O  
ATOM   3902  O   LIG A 209      15.453  16.797 -13.870  3.00  0.00           O  
ATOM   3903  C1  LIG A 209     -43.405 -26.165  13.240  0.00  0.00           C  
ATOM   3904  C1  LIG A 209     -33.972 -32.945  20.520  8.00  0.00           C  
ATOM   3905  C1  LIG A 209       7.205  26.310 -13.010  0.00  0.00           C  
ATOM   3906  C1  LIG A 209      14.680  17.125 -16.940  1.00  0.00           C  
ATOM   3907  N1  LIG A 209     -42.828 -23.861  14.140  6.00  0.00           N  
ATOM   3908  N1  LIG A 209     -31.495 -32.791  21.000  3.00  0.00           N  
ATOM   3909  N1  LIG A 209       5.229  25.618 -11.550  4.00  0.00           N  
ATOM   3910  N1  LIG A 209      12.869  16.788 -18.450  4.00  0.00           N  
ATOM   3911  O1  LIG A 209     -39.258 -20.944  13.300  7.00  0.00           O  
ATOM   3912  O1  LIG A 209     -28.425 -29.642  21.980  7.00  0.00           O  
ATOM   3913  O1  LIG A 209       3.660  22.612  -8.400  7.00  0.00           O  
ATOM   3914  O1  LIG A 209       8.214  16.493 -18.830  1.00  0.00           O  
ATOM   3915  C2  LIG A 209     -43.798 -24.874  14.000  8.00  0.00           C  
ATOM   3916  C2  LIG A 209     -32.502 -33.562  20.330  2.00  0.00           C  
ATOM   3917  C2  LIG A 209       5.645  26.114 -12.890  9.00  0.00           C  
ATOM   3918  C2  LIG A 209      14.248  16.474 -18.190  5.00  0.00           C  
ATOM   3919  N2  LIG A 209     -41.584 -22.229  15.110  1.00  0.00           N  
ATOM   3920  N2  LIG A 209     -30.069 -32.083  22.550  5.00  0.00           N  
ATOM   3921  N2  LIG A 209       5.247  25.264  -9.400  8.00  0.00           N  
ATOM   3922  N2  LIG A 209      11.008  17.777 -19.260  9.00  0.00           N  
ATOM   3923  C3  LIG A 209     -42.547 -23.137  15.270  4.00  0.00           C  
ATOM   3924  C3  LIG A 209     -31.169 -32.882  22.350  5.00  0.00           C  
ATOM   3925  C3  LIG A 209       5.617  26.107 -10.330  3.00  0.00           C  
ATOM   3926  C3  LIG A 209      12.347  17.835 -19.100  4.00  0.00           C  
ATOM   3927  N3  LIG A 209     -41.980 -23.720  11.910  0.00  0.00           N  
ATOM   3928  N3  LIG A 209     -30.833 -31.310  19.120  6.00  0.00           N  
ATOM   3929  N3  LIG A 209       3.628  23.892 -12.240  4.00  0.00           N  
ATOM   3930  N3  LIG A 209      11.594  14.850 -17.380  5.00  0.00           N  
ATOM   3931  C4  LIG A 209     -41.239 -22.270  13.750  5.00  0.00           C  
ATOM   3932  C4  LIG A 209     -29.961 -31.322  21.450  6.00  0.00           C  
ATOM   3933  C4  LIG A 209       4.375  24.326  -9.940  8.00  0.00           C  
ATOM   3934  C4  LIG A 209      10.666  16.640 -18.590  8.00  0.00           C  
ATOM   3935  N4  LIG A 209     -40.154 -22.219  11.690  9.00  0.00           N  
ATOM   3936  N4  LIG A 209     -29.378 -29.601  19.970  9.00  0.00           N  
ATOM   3937  N4  LIG A 209       3.046  22.450 -10.440  6.00  0.00           N  
ATOM   3938  N4  LIG A 209       9.267  15.026 -17.590  3.00  0.00           N  
ATOM   3939  C5  LIG A 209     -42.101 -23.230  13.170  5.00  0.00           C  
ATOM   3940  C5  LIG A 209     -30.795 -31.784  20.470  5.00  0.00           C  
ATOM   3941  C5  LIG A 209       4.307  24.664 -11.290  2.00  0.00           C  
ATOM   3942  C5  LIG A 209      11.703  16.018 -18.110  1.00  0.00           C  
ATOM   3943  N5  LIG A 209     -41.000 -23.384   9.970  7.00  0.00           N  
ATOM   3944  N5  LIG A 209     -29.610 -29.865  17.810  6.00  0.00           N  
ATOM   3945  N5  LIG A 209       2.713  21.913 -12.660  7.00  0.00           N  
ATOM   3946  N5  LIG A 209      10.255  13.297 -16.610  8.00  0.00           N  
ATOM   3947  C6  LIG A 209     -40.109 -21.746  12.920  5.00  0.00           C  
ATOM   3948  C6  LIG A 209     -29.169 -30.140  21.160  2.00  0.00           C  
ATOM   3949  C6  LIG A 209       3.645  23.089  -9.500  6.00  0.00           C  
ATOM   3950  C6  LIG A 209       9.300  16.086 -18.420  1.00  0.00           C  
ATOM   3951  C7  LIG A 209     -41.063 -23.125  11.220  3.00  0.00           C  
ATOM   3952  C7  LIG A 209     -30.045 -30.268  19.000  4.00  0.00           C  
ATOM   3953  C7  LIG A 209       3.109  22.790 -11.760  8.00  0.00           C  
ATOM   3954  C7  LIG A 209      10.363  14.495 -17.110  0.00  0.00           C  
ATOM   3955  H   LIG A 209     -42.416 -26.875  14.910  4.00  0.00           H  
ATOM   3956  H   LIG A 209     -33.460 -31.157  19.750  7.00  0.00           H  
ATOM   3957  H   LIG A 209       7.487  24.658 -11.920  4.00  0.00           H  
ATOM   3958  H   LIG A 209      13.090  16.265 -16.060  4.00  0.00           H  
ATOM   3959  H1  LIG A 209     -44.209 -26.881  13.410  8.00  0.00           H  
ATOM   3960  H1  LIG A 209     -34.785 -33.643  20.230  6.00  0.00           H  
ATOM   3961  H1  LIG A 209       7.615  26.713 -14.010  8.00  0.00           H  
ATOM   3962  H1  LIG A 209      15.743  16.903 -16.880  7.00  0.00           H  
ATOM   3963  H2  LIG A 209     -43.299 -26.000  12.220  4.00  0.00           H  
ATOM   3964  H2  LIG A 209     -34.151 -32.536  21.540  3.00  0.00           H  
ATOM   3965  H2  LIG A 209       7.636  26.847 -12.220  2.00  0.00           H  
ATOM   3966  H2  LIG A 209      14.495  18.188 -16.810  6.00  0.00           H  
ATOM   3967  H3  LIG A 209     -44.179 -25.253  15.000  3.00  0.00           H  
ATOM   3968  H3  LIG A 209     -32.334 -33.615  19.220  2.00  0.00           H  
ATOM   3969  H3  LIG A 209       5.298  25.599 -13.750  9.00  0.00           H  
ATOM   3970  H3  LIG A 209      14.361  15.427 -18.240  0.00  0.00           H  
ATOM   3971  H4  LIG A 209     -44.572 -24.398  13.350  2.00  0.00           H  
ATOM   3972  H4  LIG A 209     -32.340 -34.626  20.570  2.00  0.00           H  
ATOM   3973  H4  LIG A 209       5.229  27.142 -13.100  9.00  0.00           H  
ATOM   3974  H4  LIG A 209      14.826  16.980 -18.970  1.00  0.00           H  
ATOM   3975  H5  LIG A 209     -42.880 -23.476  16.270  0.00  0.00           H  
ATOM   3976  H5  LIG A 209     -31.615 -33.545  23.060  3.00  0.00           H  
ATOM   3977  H5  LIG A 209       6.376  26.833 -10.260  5.00  0.00           H  
ATOM   3978  H5  LIG A 209      13.063  18.587 -19.480  0.00  0.00           H  
ATOM   3979  H6  LIG A 209     -39.489 -21.857  11.050  1.00  0.00           H  
ATOM   3980  H6  LIG A 209     -28.865 -28.779  19.750  6.00  0.00           H  
ATOM   3981  H6  LIG A 209       2.549  21.636 -10.100  0.00  0.00           H  
ATOM   3982  H6  LIG A 209       8.328  14.616 -17.410  6.00  0.00           H  
ATOM   3983  H7  LIG A 209     -41.173 -24.306   9.650  1.00  0.00           H  
ATOM   3984  H7  LIG A 209     -29.554 -30.653  17.130  9.00  0.00           H  
ATOM   3985  H7  LIG A 209       2.678  20.948 -12.600  8.00  0.00           H  
ATOM   3986  H7  LIG A 209       9.399  12.987 -16.200  7.00  0.00           H  
ATOM   3987  H8  LIG A 209     -40.110 -23.029   9.630  1.00  0.00           H  
ATOM   3988  H8  LIG A 209     -28.850 -29.215  17.790  4.00  0.00           H  
ATOM   3989  H8  LIG A 209       3.014  22.235 -13.610  9.00  0.00           H  
ATOM   3990  H8  LIG A 209      11.043  13.127 -16.020  6.00  0.00           H  
END
