# Supplementary material for: Molecular Dynamics Study of the Interaction of Carbon Nanotubes with Telomeric DNA Fragment Containing Noncanonical G-Quadruplex and i-Motif Forms
Source: Int J Mol Sci. 2020 Mar 11;21(6):1925. doi: 10.3390/ijms21061925 (PMC7139311; doi:10.3390/ijms21061925)
Supplement: Supplementary file 1 [file ijms-21-01925-s001.zip › fig3_C.pdb]

HEADER    a10x
ATOM      1  C5' DG5 A   1     -15.255  48.262  -1.290  5.00  0.00           C  
ATOM      2  O5' DG5 A   1     -16.569  48.203  -1.810  5.00  0.00           O  
ATOM      3  C4' DG5 A   1     -14.664  46.956  -0.760  0.00  0.00           C  
ATOM      4  O4' DG5 A   1     -15.591  46.302   0.090  6.00  0.00           O  
ATOM      5  C3' DG5 A   1     -14.462  45.901  -1.810  3.00  0.00           C  
ATOM      6  O3' DG5 A   1     -13.330  45.104  -1.450  2.00  0.00           O  
ATOM      7  C2' DG5 A   1     -15.776  45.114  -1.860  0.00  0.00           C  
ATOM      8  C1' DG5 A   1     -15.986  45.000  -0.420  1.00  0.00           C  
ATOM      9  N1  DG5 A   1     -18.212  42.042   2.940  4.00  0.00           N  
ATOM     10  C2  DG5 A   1     -16.906  42.404   2.810  2.00  0.00           C  
ATOM     11  N2  DG5 A   1     -15.941  41.884   3.550  4.00  0.00           N  
ATOM     12  N3  DG5 A   1     -16.471  43.269   1.910  3.00  0.00           N  
ATOM     13  C4  DG5 A   1     -17.430  43.656   1.030  7.00  0.00           C  
ATOM     14  C5  DG5 A   1     -18.743  43.258   1.030  3.00  0.00           C  
ATOM     15  C6  DG5 A   1     -19.189  42.337   2.000  3.00  0.00           C  
ATOM     16  O6  DG5 A   1     -20.363  41.922   2.070  2.00  0.00           O  
ATOM     17  N7  DG5 A   1     -19.457  43.854  -0.030  8.00  0.00           N  
ATOM     18  C8  DG5 A   1     -18.520  44.549  -0.600  8.00  0.00           C  
ATOM     19  N9  DG5 A   1     -17.281  44.458  -0.080  5.00  0.00           N  
ATOM     20 HO5' DG5 A   1     -16.835  49.130  -2.180  2.00  0.00           H  
ATOM     21  H1  DG5 A   1     -18.445  41.323   3.630  0.00  0.00           H  
ATOM     22  H8  DG5 A   1     -18.610  45.181  -1.480  8.00  0.00           H  
ATOM     23  H1' DG5 A   1     -15.200  44.296  -0.070  5.00  0.00           H  
ATOM     24  H2' DG5 A   1     -16.649  45.704  -2.300  7.00  0.00           H  
ATOM     25  H21 DG5 A   1     -16.133  41.176   4.200  1.00  0.00           H  
ATOM     26  H3' DG5 A   1     -14.237  46.340  -2.780  0.00  0.00           H  
ATOM     27  H22 DG5 A   1     -14.960  42.111   3.240  4.00  0.00           H  
ATOM     28  H4' DG5 A   1     -13.743  47.126  -0.250  7.00  0.00           H  
ATOM     29  H5' DG5 A   1     -15.118  48.979  -0.520  1.00  0.00           H  
ATOM     30 H2'' DG5 A   1     -15.692  44.187  -2.310  7.00  0.00           H  
ATOM     31 H5'' DG5 A   1     -14.524  48.694  -2.010  9.00  0.00           H  
ATOM     32  P    DG A   2     -11.979  45.019  -2.330  9.00  0.00           P  
ATOM     33  C5'  DG A   2     -10.543  43.800  -0.480  0.00  0.00           C  
ATOM     34  O5'  DG A   2     -11.210  43.756  -1.720  1.00  0.00           O  
ATOM     35  C4'  DG A   2     -10.688  42.480   0.270  5.00  0.00           C  
ATOM     36  O4'  DG A   2     -12.060  42.305   0.690  6.00  0.00           O  
ATOM     37  C3'  DG A   2     -10.245  41.210  -0.410  5.00  0.00           C  
ATOM     38  O3'  DG A   2      -9.306  40.565   0.470  6.00  0.00           O  
ATOM     39  C2'  DG A   2     -11.597  40.559  -0.710  5.00  0.00           C  
ATOM     40  C1'  DG A   2     -12.486  40.964   0.430  5.00  0.00           C  
ATOM     41  N1   DG A   2     -16.979  38.739   0.850  9.00  0.00           N  
ATOM     42  C2   DG A   2     -15.864  38.630   1.650  1.00  0.00           C  
ATOM     43  N2   DG A   2     -16.051  38.017   2.780  3.00  0.00           N  
ATOM     44  N3   DG A   2     -14.720  39.289   1.430  3.00  0.00           N  
ATOM     45  C4   DG A   2     -14.915  40.198   0.460  4.00  0.00           C  
ATOM     46  C5   DG A   2     -16.005  40.556  -0.330  0.00  0.00           C  
ATOM     47  C6   DG A   2     -17.107  39.707  -0.100  8.00  0.00           C  
ATOM     48  O6   DG A   2     -18.121  39.729  -0.710  9.00  0.00           O  
ATOM     49  N7   DG A   2     -15.699  41.622  -1.110  7.00  0.00           N  
ATOM     50  C8   DG A   2     -14.430  41.868  -0.790  5.00  0.00           C  
ATOM     51  N9   DG A   2     -13.886  41.017   0.080  1.00  0.00           N  
ATOM     52  OP1  DG A   2     -11.205  46.264  -2.300  9.00  0.00           O  
ATOM     53  OP2  DG A   2     -12.318  44.542  -3.680  5.00  0.00           O1-
ATOM     54  H1   DG A   2     -17.905  38.353   1.120  4.00  0.00           H  
ATOM     55  H8   DG A   2     -13.890  42.774  -1.130  5.00  0.00           H  
ATOM     56  H1'  DG A   2     -12.305  40.285   1.310  9.00  0.00           H  
ATOM     57  H2'  DG A   2     -11.896  41.041  -1.700  6.00  0.00           H  
ATOM     58  H21  DG A   2     -16.984  37.488   2.920  4.00  0.00           H  
ATOM     59  H3'  DG A   2      -9.801  41.491  -1.380  1.00  0.00           H  
ATOM     60  H22  DG A   2     -15.220  37.882   3.400  1.00  0.00           H  
ATOM     61  H4'  DG A   2     -10.076  42.538   1.200  2.00  0.00           H  
ATOM     62  H5'  DG A   2     -10.872  44.555   0.200  3.00  0.00           H  
ATOM     63 H2''  DG A   2     -11.506  39.519  -0.760  2.00  0.00           H  
ATOM     64 H5''  DG A   2      -9.541  44.008  -0.810  6.00  0.00           H  
ATOM     65  P    DG A   3      -8.803  39.112   0.170  5.00  0.00           P  
ATOM     66  C5'  DG A   3     -10.001  37.972   2.250  6.00  0.00           C  
ATOM     67  O5'  DG A   3      -9.916  38.188   0.880  7.00  0.00           O  
ATOM     68  C4'  DG A   3     -10.702  36.660   2.670  5.00  0.00           C  
ATOM     69  O4'  DG A   3     -12.038  36.683   2.270  0.00  0.00           O  
ATOM     70  C3'  DG A   3     -10.070  35.421   2.040  6.00  0.00           C  
ATOM     71  O3'  DG A   3     -10.142  34.389   3.020  3.00  0.00           O  
ATOM     72  C2'  DG A   3     -11.002  35.209   0.900  1.00  0.00           C  
ATOM     73  C1'  DG A   3     -12.352  35.595   1.430  8.00  0.00           C  
ATOM     74  N1   DG A   3     -16.967  35.084  -0.700  6.00  0.00           N  
ATOM     75  C2   DG A   3     -16.468  34.527   0.500  1.00  0.00           C  
ATOM     76  N2   DG A   3     -17.049  33.435   0.920  1.00  0.00           N  
ATOM     77  N3   DG A   3     -15.248  34.726   0.990  2.00  0.00           N  
ATOM     78  C4   DG A   3     -14.542  35.707   0.270  4.00  0.00           C  
ATOM     79  C5   DG A   3     -15.002  36.438  -0.840  3.00  0.00           C  
ATOM     80  C6   DG A   3     -16.344  36.120  -1.320  8.00  0.00           C  
ATOM     81  O6   DG A   3     -16.817  36.549  -2.360  5.00  0.00           O  
ATOM     82  N7   DG A   3     -14.014  37.338  -1.270  1.00  0.00           N  
ATOM     83  C8   DG A   3     -13.008  37.140  -0.480  1.00  0.00           C  
ATOM     84  N9   DG A   3     -13.259  36.128   0.440  7.00  0.00           N  
ATOM     85  OP1  DG A   3      -7.515  39.004   0.970  9.00  0.00           O  
ATOM     86  OP2  DG A   3      -8.860  38.810  -1.260  7.00  0.00           O1-
ATOM     87  H1   DG A   3     -17.929  34.783  -0.980  6.00  0.00           H  
ATOM     88  H8   DG A   3     -12.032  37.663  -0.610  1.00  0.00           H  
ATOM     89  H1'  DG A   3     -12.882  34.804   1.920  8.00  0.00           H  
ATOM     90  H2'  DG A   3     -10.608  35.762   0.050  5.00  0.00           H  
ATOM     91  H21  DG A   3     -18.006  33.231   0.530  8.00  0.00           H  
ATOM     92  H3'  DG A   3      -9.011  35.613   1.730  4.00  0.00           H  
ATOM     93  H22  DG A   3     -16.690  32.864   1.730  5.00  0.00           H  
ATOM     94  H4'  DG A   3     -10.561  36.578   3.750  6.00  0.00           H  
ATOM     95  H5'  DG A   3     -10.497  38.856   2.670  7.00  0.00           H  
ATOM     96 H2''  DG A   3     -11.014  34.106   0.480  6.00  0.00           H  
ATOM     97 H5''  DG A   3      -8.992  37.944   2.780  3.00  0.00           H  
ATOM     98  P    DT A   4      -9.444  32.973   2.750  7.00  0.00           P  
ATOM     99  C5'  DT A   4     -11.766  31.761   3.030  2.00  0.00           C  
ATOM    100  O5'  DT A   4     -10.668  32.043   2.220  3.00  0.00           O  
ATOM    101  C4'  DT A   4     -12.950  31.054   2.280  7.00  0.00           C  
ATOM    102  O4'  DT A   4     -13.337  32.007   1.290  4.00  0.00           O  
ATOM    103  C3'  DT A   4     -12.800  29.768   1.550  6.00  0.00           C  
ATOM    104  O3'  DT A   4     -13.478  28.667   2.250  2.00  0.00           O  
ATOM    105  C2'  DT A   4     -13.247  30.105   0.090  4.00  0.00           C  
ATOM    106  C1'  DT A   4     -14.106  31.288   0.300  9.00  0.00           C  
ATOM    107  N1   DT A   4     -14.296  32.132  -0.880  4.00  0.00           N  
ATOM    108  C2   DT A   4     -15.511  32.148  -1.550  7.00  0.00           C  
ATOM    109  O2   DT A   4     -16.418  31.410  -1.120  6.00  0.00           O  
ATOM    110  N3   DT A   4     -15.658  32.981  -2.670  0.00  0.00           N  
ATOM    111  C4   DT A   4     -14.620  33.759  -3.120  3.00  0.00           C  
ATOM    112  O4   DT A   4     -14.828  34.562  -3.990  1.00  0.00           O  
ATOM    113  C5   DT A   4     -13.311  33.518  -2.450  9.00  0.00           C  
ATOM    114  C6   DT A   4     -13.200  32.712  -1.440  4.00  0.00           C  
ATOM    115  C7   DT A   4     -11.967  34.053  -3.040  1.00  0.00           C  
ATOM    116  OP1  DT A   4      -8.850  32.521   4.020  8.00  0.00           O  
ATOM    117  OP2  DT A   4      -8.558  33.213   1.620  1.00  0.00           O1-
ATOM    118  H3   DT A   4     -16.518  32.940  -3.220  5.00  0.00           H  
ATOM    119  H6   DT A   4     -12.201  32.498  -1.030  8.00  0.00           H  
ATOM    120  H1'  DT A   4     -15.058  30.986   0.750  3.00  0.00           H  
ATOM    121  H2'  DT A   4     -12.325  30.394  -0.440  6.00  0.00           H  
ATOM    122  H3'  DT A   4     -11.692  29.535   1.550  2.00  0.00           H  
ATOM    123  H4'  DT A   4     -13.742  30.896   3.050  6.00  0.00           H  
ATOM    124  H5'  DT A   4     -12.174  32.703   3.340  4.00  0.00           H  
ATOM    125  H71  DT A   4     -11.708  33.620  -4.020  6.00  0.00           H  
ATOM    126  H72  DT A   4     -11.934  35.097  -3.110  0.00  0.00           H  
ATOM    127  H73  DT A   4     -11.129  33.713  -2.450  2.00  0.00           H  
ATOM    128 H2''  DT A   4     -13.809  29.321  -0.390  2.00  0.00           H  
ATOM    129 H5''  DT A   4     -11.336  31.069   3.850  8.00  0.00           H  
ATOM    130  P    DT A   5     -13.405  27.125   1.840  0.00  0.00           P  
ATOM    131  C5'  DT A   5     -15.871  27.110   1.190  0.00  0.00           C  
ATOM    132  O5'  DT A   5     -14.514  26.961   0.790  3.00  0.00           O  
ATOM    133  C4'  DT A   5     -16.810  26.799   0.140  3.00  0.00           C  
ATOM    134  O4'  DT A   5     -16.752  27.776  -0.880  7.00  0.00           O  
ATOM    135  C3'  DT A   5     -16.592  25.420  -0.510  7.00  0.00           C  
ATOM    136  O3'  DT A   5     -17.907  24.756  -0.560  4.00  0.00           O  
ATOM    137  C2'  DT A   5     -16.099  25.801  -1.850  8.00  0.00           C  
ATOM    138  C1'  DT A   5     -16.804  27.110  -2.160  9.00  0.00           C  
ATOM    139  N1   DT A   5     -16.118  27.999  -3.120  3.00  0.00           N  
ATOM    140  C2   DT A   5     -16.893  28.707  -4.080  0.00  0.00           C  
ATOM    141  O2   DT A   5     -18.101  28.506  -4.160  3.00  0.00           O  
ATOM    142  N3   DT A   5     -16.297  29.713  -4.800  4.00  0.00           N  
ATOM    143  C4   DT A   5     -15.002  30.017  -4.730  5.00  0.00           C  
ATOM    144  O4   DT A   5     -14.564  30.945  -5.410  8.00  0.00           O  
ATOM    145  C5   DT A   5     -14.183  29.115  -3.910  8.00  0.00           C  
ATOM    146  C6   DT A   5     -14.771  28.230  -3.070  3.00  0.00           C  
ATOM    147  C7   DT A   5     -12.636  29.276  -3.900  8.00  0.00           C  
ATOM    148  OP1  DT A   5     -13.640  26.202   2.970  2.00  0.00           O  
ATOM    149  OP2  DT A   5     -12.177  26.911   0.970  1.00  0.00           O1-
ATOM    150  H3   DT A   5     -16.890  30.355  -5.310  4.00  0.00           H  
ATOM    151  H6   DT A   5     -14.181  27.627  -2.310  8.00  0.00           H  
ATOM    152  H1'  DT A   5     -17.824  26.718  -2.470  1.00  0.00           H  
ATOM    153  H2'  DT A   5     -15.015  25.878  -1.890  3.00  0.00           H  
ATOM    154  H3'  DT A   5     -15.863  24.842  -0.020  2.00  0.00           H  
ATOM    155  H4'  DT A   5     -17.806  26.931   0.530  1.00  0.00           H  
ATOM    156  H5'  DT A   5     -16.084  28.101   1.560  0.00  0.00           H  
ATOM    157  H71  DT A   5     -12.279  29.066  -4.950  5.00  0.00           H  
ATOM    158  H72  DT A   5     -12.308  30.192  -3.480  4.00  0.00           H  
ATOM    159  H73  DT A   5     -12.233  28.396  -3.320  0.00  0.00           H  
ATOM    160 H2''  DT A   5     -16.370  25.066  -2.610  0.00  0.00           H  
ATOM    161 H5''  DT A   5     -16.058  26.560   2.110  6.00  0.00           H  
ATOM    162  P    DA A   6     -18.130  23.239  -1.040  8.00  0.00           P  
ATOM    163  C5'  DA A   6     -19.271  23.622  -3.360  2.00  0.00           C  
ATOM    164  O5'  DA A   6     -18.146  23.231  -2.640  0.00  0.00           O  
ATOM    165  C4'  DA A   6     -19.085  23.764  -4.890  4.00  0.00           C  
ATOM    166  O4'  DA A   6     -18.293  24.965  -5.250  5.00  0.00           O  
ATOM    167  C3'  DA A   6     -18.383  22.665  -5.580  1.00  0.00           C  
ATOM    168  O3'  DA A   6     -18.977  22.249  -6.770  0.00  0.00           O  
ATOM    169  C2'  DA A   6     -16.941  23.107  -5.710  8.00  0.00           C  
ATOM    170  C1'  DA A   6     -17.314  24.478  -6.220  4.00  0.00           C  
ATOM    171  N1   DA A   6     -15.339  28.499  -8.680  2.00  0.00           N  
ATOM    172  C2   DA A   6     -16.567  27.980  -8.650  0.00  0.00           C  
ATOM    173  N3   DA A   6     -16.946  26.844  -8.060  3.00  0.00           N  
ATOM    174  C4   DA A   6     -15.970  26.310  -7.240  5.00  0.00           C  
ATOM    175  C5   DA A   6     -14.717  26.790  -7.040  6.00  0.00           C  
ATOM    176  C6   DA A   6     -14.402  27.942  -7.870  8.00  0.00           C  
ATOM    177  N6   DA A   6     -13.285  28.605  -7.930  1.00  0.00           N  
ATOM    178  N7   DA A   6     -14.054  26.186  -5.910  8.00  0.00           N  
ATOM    179  C8   DA A   6     -15.007  25.332  -5.570  2.00  0.00           C  
ATOM    180  N9   DA A   6     -16.138  25.342  -6.300  7.00  0.00           N  
ATOM    181  OP1  DA A   6     -19.394  22.618  -0.590  4.00  0.00           O  
ATOM    182  OP2  DA A   6     -16.898  22.441  -0.710  4.00  0.00           O1-
ATOM    183  H2   DA A   6     -17.340  28.500  -9.170  1.00  0.00           H  
ATOM    184  H8   DA A   6     -14.795  24.655  -4.730  4.00  0.00           H  
ATOM    185  H1'  DA A   6     -17.829  24.434  -7.240  9.00  0.00           H  
ATOM    186  H2'  DA A   6     -16.463  23.104  -4.720  8.00  0.00           H  
ATOM    187  H3'  DA A   6     -18.444  21.812  -4.920  6.00  0.00           H  
ATOM    188  H4'  DA A   6     -20.070  23.822  -5.300  2.00  0.00           H  
ATOM    189  H5'  DA A   6     -19.625  24.623  -3.050  6.00  0.00           H  
ATOM    190  H61  DA A   6     -12.993  29.173  -8.700  1.00  0.00           H  
ATOM    191  H62  DA A   6     -12.653  28.474  -7.120  3.00  0.00           H  
ATOM    192 H2''  DA A   6     -16.505  22.556  -6.560  8.00  0.00           H  
ATOM    193 H5''  DA A   6     -20.121  22.972  -3.160  6.00  0.00           H  
ATOM    194  P    DG A   7     -19.285  20.725  -7.140  2.00  0.00           P  
ATOM    195  C5'  DG A   7     -21.260  21.589  -8.660  4.00  0.00           C  
ATOM    196  O5'  DG A   7     -19.994  20.908  -8.570  0.00  0.00           O  
ATOM    197  C4'  DG A   7     -21.343  22.503  -9.900  9.00  0.00           C  
ATOM    198  O4'  DG A   7     -20.379  23.507  -9.950  5.00  0.00           O  
ATOM    199  C3'  DG A   7     -21.335  21.736 -11.230  2.00  0.00           C  
ATOM    200  O3'  DG A   7     -22.127  22.445 -12.180  7.00  0.00           O  
ATOM    201  C2'  DG A   7     -19.861  21.824 -11.520  5.00  0.00           C  
ATOM    202  C1'  DG A   7     -19.444  23.205 -10.950  5.00  0.00           C  
ATOM    203  N1   DG A   7     -15.614  26.530 -11.140  8.00  0.00           N  
ATOM    204  C2   DG A   7     -16.769  26.554 -11.780  5.00  0.00           C  
ATOM    205  N2   DG A   7     -17.125  27.594 -12.430  1.00  0.00           N  
ATOM    206  N3   DG A   7     -17.733  25.644 -11.590  4.00  0.00           N  
ATOM    207  C4   DG A   7     -17.423  24.621 -10.720  8.00  0.00           C  
ATOM    208  C5   DG A   7     -16.230  24.546 -10.070  4.00  0.00           C  
ATOM    209  C6   DG A   7     -15.213  25.551 -10.320  1.00  0.00           C  
ATOM    210  O6   DG A   7     -14.068  25.665  -9.980  4.00  0.00           O  
ATOM    211  N7   DG A   7     -16.231  23.361  -9.230  1.00  0.00           N  
ATOM    212  C8   DG A   7     -17.372  22.792  -9.550  3.00  0.00           C  
ATOM    213  N9   DG A   7     -18.088  23.441 -10.460  1.00  0.00           N  
ATOM    214  OP1  DG A   7     -20.231  20.161  -6.150  9.00  0.00           O  
ATOM    215  OP2  DG A   7     -17.998  20.002  -7.370  3.00  0.00           O1-
ATOM    216  H1   DG A   7     -14.855  27.103 -11.480  1.00  0.00           H  
ATOM    217  H8   DG A   7     -17.703  21.830  -9.220  0.00  0.00           H  
ATOM    218  H1'  DG A   7     -19.621  23.941 -11.800  8.00  0.00           H  
ATOM    219  H2'  DG A   7     -19.336  21.009 -11.030  7.00  0.00           H  
ATOM    220  H21  DG A   7     -16.322  28.244 -12.780  2.00  0.00           H  
ATOM    221  H3'  DG A   7     -21.726  20.679 -11.140  8.00  0.00           H  
ATOM    222  H22  DG A   7     -18.034  27.725 -12.700  5.00  0.00           H  
ATOM    223  H4'  DG A   7     -22.312  22.991  -9.920  8.00  0.00           H  
ATOM    224  H5'  DG A   7     -21.422  22.214  -7.790  2.00  0.00           H  
ATOM    225 H2''  DG A   7     -19.647  21.701 -12.580  3.00  0.00           H  
ATOM    226 H5''  DG A   7     -22.062  20.807  -8.740  9.00  0.00           H  
ATOM    227  P    DG A   8     -22.538  21.852 -13.620  8.00  0.00           P  
ATOM    228  C5'  DG A   8     -21.322  23.706 -15.280  0.00  0.00           C  
ATOM    229  O5'  DG A   8     -21.386  22.320 -14.720  1.00  0.00           O  
ATOM    230  C4'  DG A   8     -20.089  24.101 -15.990  4.00  0.00           C  
ATOM    231  O4'  DG A   8     -19.007  24.310 -15.030  9.00  0.00           O  
ATOM    232  C3'  DG A   8     -19.495  23.088 -17.030  9.00  0.00           C  
ATOM    233  O3'  DG A   8     -19.376  23.907 -18.220  9.00  0.00           O  
ATOM    234  C2'  DG A   8     -18.195  22.633 -16.410  4.00  0.00           C  
ATOM    235  C1'  DG A   8     -17.814  23.888 -15.630  6.00  0.00           C  
ATOM    236  N1   DG A   8     -13.018  24.935 -14.250  7.00  0.00           N  
ATOM    237  C2   DG A   8     -13.849  25.684 -15.020  9.00  0.00           C  
ATOM    238  N2   DG A   8     -13.359  26.713 -15.590  8.00  0.00           N  
ATOM    239  N3   DG A   8     -15.104  25.383 -15.240  5.00  0.00           N  
ATOM    240  C4   DG A   8     -15.545  24.285 -14.530  9.00  0.00           C  
ATOM    241  C5   DG A   8     -14.800  23.577 -13.600  9.00  0.00           C  
ATOM    242  C6   DG A   8     -13.422  23.895 -13.430  6.00  0.00           C  
ATOM    243  O6   DG A   8     -12.573  23.502 -12.650  6.00  0.00           O  
ATOM    244  N7   DG A   8     -15.591  22.606 -13.010  2.00  0.00           N  
ATOM    245  C8   DG A   8     -16.763  22.683 -13.580  9.00  0.00           C  
ATOM    246  N9   DG A   8     -16.811  23.663 -14.590  2.00  0.00           N  
ATOM    247  OP1  DG A   8     -23.864  22.423 -13.980  5.00  0.00           O  
ATOM    248  OP2  DG A   8     -22.590  20.388 -13.560  3.00  0.00           O1-
ATOM    249  H1   DG A   8     -12.087  25.438 -14.100  5.00  0.00           H  
ATOM    250  H8   DG A   8     -17.572  21.896 -13.460  6.00  0.00           H  
ATOM    251  H1'  DG A   8     -17.538  24.702 -16.330  6.00  0.00           H  
ATOM    252  H2'  DG A   8     -18.323  21.875 -15.650  5.00  0.00           H  
ATOM    253  H21  DG A   8     -12.442  26.998 -15.220  0.00  0.00           H  
ATOM    254  H3'  DG A   8     -20.235  22.319 -17.190  1.00  0.00           H  
ATOM    255  H22  DG A   8     -13.787  27.092 -16.460  8.00  0.00           H  
ATOM    256  H4'  DG A   8     -20.221  25.005 -16.530  8.00  0.00           H  
ATOM    257  H5'  DG A   8     -21.558  24.376 -14.440  0.00  0.00           H  
ATOM    258 H2''  DG A   8     -17.338  22.495 -17.100  8.00  0.00           H  
ATOM    259 H5''  DG A   8     -22.104  23.835 -16.010  3.00  0.00           H  
ATOM    260  P    DG A   9     -19.032  23.400 -19.600  6.00  0.00           P  
ATOM    261  C5'  DG A   9     -17.133  25.053 -19.950  7.00  0.00           C  
ATOM    262  O5'  DG A   9     -17.549  23.745 -19.820  0.00  0.00           O  
ATOM    263  C4'  DG A   9     -15.604  25.258 -19.930  7.00  0.00           C  
ATOM    264  O4'  DG A   9     -15.161  24.789 -18.660  5.00  0.00           O  
ATOM    265  C3'  DG A   9     -14.907  24.559 -21.060  2.00  0.00           C  
ATOM    266  O3'  DG A   9     -13.854  25.444 -21.530  9.00  0.00           O  
ATOM    267  C2'  DG A   9     -14.197  23.448 -20.270  1.00  0.00           C  
ATOM    268  C1'  DG A   9     -13.904  24.113 -18.920  1.00  0.00           C  
ATOM    269  N1   DG A   9     -10.301  22.705 -15.620  2.00  0.00           N  
ATOM    270  C2   DG A   9     -10.295  23.662 -16.550  0.00  0.00           C  
ATOM    271  N2   DG A   9      -9.249  24.457 -16.550  5.00  0.00           N  
ATOM    272  N3   DG A   9     -11.326  23.895 -17.410  3.00  0.00           N  
ATOM    273  C4   DG A   9     -12.390  23.052 -17.140  3.00  0.00           C  
ATOM    274  C5   DG A   9     -12.498  22.034 -16.230  4.00  0.00           C  
ATOM    275  C6   DG A   9     -11.364  21.830 -15.370  0.00  0.00           C  
ATOM    276  O6   DG A   9     -11.264  20.945 -14.520  5.00  0.00           O  
ATOM    277  N7   DG A   9     -13.787  21.507 -16.240  1.00  0.00           N  
ATOM    278  C8   DG A   9     -14.424  22.199 -17.190  0.00  0.00           C  
ATOM    279  N9   DG A   9     -13.646  23.185 -17.770  9.00  0.00           N  
ATOM    280  OP1  DG A   9     -19.772  24.167 -20.590  2.00  0.00           O  
ATOM    281  OP2  DG A   9     -19.085  21.898 -19.610  7.00  0.00           O1-
ATOM    282  H1   DG A   9      -9.475  22.754 -15.000  3.00  0.00           H  
ATOM    283  H8   DG A   9     -15.413  22.006 -17.530  7.00  0.00           H  
ATOM    284  H1'  DG A   9     -13.104  24.903 -18.990  6.00  0.00           H  
ATOM    285  H2'  DG A   9     -14.954  22.612 -20.070  2.00  0.00           H  
ATOM    286  H21  DG A   9      -8.539  24.302 -15.850  4.00  0.00           H  
ATOM    287  H3'  DG A   9     -15.577  24.187 -21.880  7.00  0.00           H  
ATOM    288  H22  DG A   9      -9.135  25.319 -17.140  7.00  0.00           H  
ATOM    289  H4'  DG A   9     -15.370  26.371 -20.080  9.00  0.00           H  
ATOM    290  H5'  DG A   9     -17.671  25.612 -19.160  5.00  0.00           H  
ATOM    291 H2''  DG A   9     -13.348  23.092 -20.780  0.00  0.00           H  
ATOM    292 H5''  DG A   9     -17.441  25.528 -20.840  6.00  0.00           H  
ATOM    293  P    DT A  10     -13.056  25.227 -22.870  2.00  0.00           P  
ATOM    294  C5'  DT A  10     -10.636  25.569 -21.810  3.00  0.00           C  
ATOM    295  O5'  DT A  10     -11.651  24.672 -22.370  5.00  0.00           O  
ATOM    296  C4'  DT A  10      -9.340  24.850 -21.250  1.00  0.00           C  
ATOM    297  O4'  DT A  10      -9.667  24.070 -20.110  1.00  0.00           O  
ATOM    298  C3'  DT A  10      -8.662  23.990 -22.300  2.00  0.00           C  
ATOM    299  O3'  DT A  10      -7.506  24.658 -22.740  4.00  0.00           O  
ATOM    300  C2'  DT A  10      -8.465  22.647 -21.520  9.00  0.00           C  
ATOM    301  C1'  DT A  10      -8.778  22.954 -20.040  9.00  0.00           C  
ATOM    302  N1   DT A  10      -9.280  21.773 -19.290  2.00  0.00           N  
ATOM    303  C2   DT A  10      -8.594  21.392 -18.180  7.00  0.00           C  
ATOM    304  O2   DT A  10      -7.531  21.925 -17.750  7.00  0.00           O  
ATOM    305  N3   DT A  10      -9.077  20.332 -17.370  2.00  0.00           N  
ATOM    306  C4   DT A  10     -10.196  19.607 -17.600  7.00  0.00           C  
ATOM    307  O4   DT A  10     -10.465  18.633 -16.950  0.00  0.00           O  
ATOM    308  C5   DT A  10     -10.861  20.085 -18.860  5.00  0.00           C  
ATOM    309  C6   DT A  10     -10.400  21.097 -19.620  2.00  0.00           C  
ATOM    310  C7   DT A  10     -12.097  19.497 -19.340  5.00  0.00           C  
ATOM    311  OP1  DT A  10     -12.767  26.486 -23.600  9.00  0.00           O  
ATOM    312  OP2  DT A  10     -13.576  24.123 -23.640  3.00  0.00           O1-
ATOM    313  H3   DT A  10      -8.599  19.992 -16.560  7.00  0.00           H  
ATOM    314  H6   DT A  10     -10.943  21.477 -20.450  1.00  0.00           H  
ATOM    315  H1'  DT A  10      -7.814  23.274 -19.610  9.00  0.00           H  
ATOM    316  H2'  DT A  10      -9.111  21.897 -21.840  7.00  0.00           H  
ATOM    317  H3'  DT A  10      -9.370  23.771 -23.150  4.00  0.00           H  
ATOM    318  H4'  DT A  10      -8.708  25.691 -21.080  3.00  0.00           H  
ATOM    319  H5'  DT A  10     -11.060  26.229 -21.000  4.00  0.00           H  
ATOM    320  H71  DT A  10     -12.964  19.968 -18.880  1.00  0.00           H  
ATOM    321  H72  DT A  10     -12.264  19.533 -20.450  0.00  0.00           H  
ATOM    322  H73  DT A  10     -12.261  18.412 -19.150  6.00  0.00           H  
ATOM    323 H2''  DT A  10      -7.417  22.274 -21.590  9.00  0.00           H  
ATOM    324 H5''  DT A  10     -10.420  26.284 -22.580  7.00  0.00           H  
ATOM    325  P    DT A  11      -6.186  24.135 -23.320  9.00  0.00           P  
ATOM    326  C5'  DT A  11      -4.892  24.379 -21.070  1.00  0.00           C  
ATOM    327  O5'  DT A  11      -5.309  23.548 -22.160  4.00  0.00           O  
ATOM    328  C4'  DT A  11      -4.056  23.624 -19.990  7.00  0.00           C  
ATOM    329  O4'  DT A  11      -4.775  22.606 -19.380  0.00  0.00           O  
ATOM    330  C3'  DT A  11      -2.798  22.978 -20.650  0.00  0.00           C  
ATOM    331  O3'  DT A  11      -1.708  23.135 -19.750  1.00  0.00           O  
ATOM    332  C2'  DT A  11      -3.211  21.534 -20.670  6.00  0.00           C  
ATOM    333  C1'  DT A  11      -3.996  21.421 -19.400  6.00  0.00           C  
ATOM    334  N1   DT A  11      -4.958  20.322 -19.300  5.00  0.00           N  
ATOM    335  C2   DT A  11      -4.945  19.519 -18.110  9.00  0.00           C  
ATOM    336  O2   DT A  11      -4.147  19.770 -17.170  6.00  0.00           O  
ATOM    337  N3   DT A  11      -5.859  18.481 -18.080  7.00  0.00           N  
ATOM    338  C4   DT A  11      -6.794  18.155 -18.990  1.00  0.00           C  
ATOM    339  O4   DT A  11      -7.580  17.289 -18.750  7.00  0.00           O  
ATOM    340  C5   DT A  11      -6.849  19.116 -20.090  3.00  0.00           C  
ATOM    341  C6   DT A  11      -5.962  20.110 -20.230  1.00  0.00           C  
ATOM    342  C7   DT A  11      -7.952  18.906 -21.220  4.00  0.00           C  
ATOM    343  OP1  DT A  11      -5.423  25.284 -23.830  6.00  0.00           O  
ATOM    344  OP2  DT A  11      -6.496  22.971 -24.220  3.00  0.00           O1-
ATOM    345  H3   DT A  11      -5.817  17.902 -17.210  3.00  0.00           H  
ATOM    346  H6   DT A  11      -6.029  20.891 -20.950  9.00  0.00           H  
ATOM    347  H1'  DT A  11      -3.322  21.320 -18.540  0.00  0.00           H  
ATOM    348  H2'  DT A  11      -3.862  21.584 -21.570  3.00  0.00           H  
ATOM    349  H3'  DT A  11      -2.572  23.409 -21.610  7.00  0.00           H  
ATOM    350  H4'  DT A  11      -3.741  24.341 -19.220  7.00  0.00           H  
ATOM    351  H5'  DT A  11      -5.822  24.720 -20.630  2.00  0.00           H  
ATOM    352  H71  DT A  11      -7.673  19.380 -22.120  1.00  0.00           H  
ATOM    353  H72  DT A  11      -8.080  17.844 -21.370  9.00  0.00           H  
ATOM    354  H73  DT A  11      -8.874  19.294 -21.000  3.00  0.00           H  
ATOM    355 H2''  DT A  11      -2.359  20.814 -20.830  2.00  0.00           H  
ATOM    356 H5''  DT A  11      -4.252  25.279 -21.440  7.00  0.00           H  
ATOM    357  P    DA A  12      -0.184  22.973 -20.190  8.00  0.00           P  
ATOM    358  C5'  DA A  12       0.704  23.782 -17.770  0.00  0.00           C  
ATOM    359  O5'  DA A  12       0.670  23.964 -19.210  5.00  0.00           O  
ATOM    360  C4'  DA A  12       1.315  24.972 -17.010  6.00  0.00           C  
ATOM    361  O4'  DA A  12       1.381  24.528 -15.700  5.00  0.00           O  
ATOM    362  C3'  DA A  12       2.675  25.341 -17.550  2.00  0.00           C  
ATOM    363  O3'  DA A  12       2.878  26.734 -17.370  3.00  0.00           O  
ATOM    364  C2'  DA A  12       3.564  24.474 -16.640  8.00  0.00           C  
ATOM    365  C1'  DA A  12       2.810  24.444 -15.300  0.00  0.00           C  
ATOM    366  N1   DA A  12       4.907  22.344 -11.070  1.00  0.00           N  
ATOM    367  C2   DA A  12       4.909  23.548 -11.570  4.00  0.00           C  
ATOM    368  N3   DA A  12       4.375  24.000 -12.650  1.00  0.00           N  
ATOM    369  C4   DA A  12       3.859  23.000 -13.450  8.00  0.00           C  
ATOM    370  C5   DA A  12       3.832  21.692 -13.120  1.00  0.00           C  
ATOM    371  C6   DA A  12       4.424  21.396 -11.830  6.00  0.00           C  
ATOM    372  N6   DA A  12       4.520  20.112 -11.370  3.00  0.00           N  
ATOM    373  N7   DA A  12       3.287  20.984 -14.140  3.00  0.00           N  
ATOM    374  C8   DA A  12       2.933  21.846 -15.020  7.00  0.00           C  
ATOM    375  N9   DA A  12       3.199  23.158 -14.660  6.00  0.00           N  
ATOM    376  OP1  DA A  12       0.038  23.549 -21.520  5.00  0.00           O  
ATOM    377  OP2  DA A  12       0.179  21.591 -19.990  1.00  0.00           O1-
ATOM    378  H2   DA A  12       5.258  24.365 -10.890  1.00  0.00           H  
ATOM    379  H8   DA A  12       2.506  21.544 -15.970  3.00  0.00           H  
ATOM    380  H1'  DA A  12       3.071  25.356 -14.720  7.00  0.00           H  
ATOM    381  H2'  DA A  12       3.677  23.533 -17.120  2.00  0.00           H  
ATOM    382  H3'  DA A  12       2.816  25.079 -18.620  3.00  0.00           H  
ATOM    383  H4'  DA A  12       0.750  25.886 -17.250  6.00  0.00           H  
ATOM    384  H5'  DA A  12       1.192  22.782 -17.610  1.00  0.00           H  
ATOM    385  H61  DA A  12       5.005  20.000 -10.480  4.00  0.00           H  
ATOM    386  H62  DA A  12       4.460  19.321 -12.010  0.00  0.00           H  
ATOM    387 H2''  DA A  12       4.558  24.867 -16.560  2.00  0.00           H  
ATOM    388 H5''  DA A  12      -0.230  23.653 -17.210  1.00  0.00           H  
ATOM    389  P    DG A  13       4.211  27.496 -17.780  5.00  0.00           P  
ATOM    390  C5'  DG A  13       5.296  27.514 -15.370  1.00  0.00           C  
ATOM    391  O5'  DG A  13       5.324  27.150 -16.750  0.00  0.00           O  
ATOM    392  C4'  DG A  13       6.462  26.938 -14.580  9.00  0.00           C  
ATOM    393  O4'  DG A  13       6.280  25.561 -14.540  6.00  0.00           O  
ATOM    394  C3'  DG A  13       7.855  27.067 -15.270  7.00  0.00           C  
ATOM    395  O3'  DG A  13       8.857  27.323 -14.300  2.00  0.00           O  
ATOM    396  C2'  DG A  13       8.038  25.680 -15.960  7.00  0.00           C  
ATOM    397  C1'  DG A  13       7.476  24.831 -14.840  4.00  0.00           C  
ATOM    398  N1   DG A  13       7.771  20.044 -12.970  4.00  0.00           N  
ATOM    399  C2   DG A  13       8.126  21.261 -12.430  3.00  0.00           C  
ATOM    400  N2   DG A  13       8.632  21.101 -11.230  9.00  0.00           N  
ATOM    401  N3   DG A  13       7.861  22.511 -12.960  1.00  0.00           N  
ATOM    402  C4   DG A  13       7.274  22.387 -14.200  8.00  0.00           C  
ATOM    403  C5   DG A  13       6.822  21.259 -14.790  7.00  0.00           C  
ATOM    404  C6   DG A  13       7.058  19.979 -14.160  1.00  0.00           C  
ATOM    405  O6   DG A  13       6.545  18.856 -14.380  0.00  0.00           O  
ATOM    406  N7   DG A  13       6.131  21.542 -16.020  9.00  0.00           N  
ATOM    407  C8   DG A  13       6.471  22.819 -16.210  3.00  0.00           C  
ATOM    408  N9   DG A  13       7.054  23.414 -15.110  2.00  0.00           N  
ATOM    409  OP1  DG A  13       3.933  28.919 -17.790  1.00  0.00           O  
ATOM    410  OP2  DG A  13       4.622  26.865 -19.030  4.00  0.00           O1-
ATOM    411  H1   DG A  13       7.836  19.189 -12.470  0.00  0.00           H  
ATOM    412  H8   DG A  13       6.131  23.462 -17.090  6.00  0.00           H  
ATOM    413  H1'  DG A  13       8.128  24.897 -13.900  5.00  0.00           H  
ATOM    414  H2'  DG A  13       7.388  25.649 -16.860  1.00  0.00           H  
ATOM    415  H21  DG A  13       8.839  20.220 -10.860  3.00  0.00           H  
ATOM    416  H3'  DG A  13       7.850  27.834 -16.040  4.00  0.00           H  
ATOM    417  H22  DG A  13       8.793  21.920 -10.670  8.00  0.00           H  
ATOM    418  H4'  DG A  13       6.524  27.322 -13.500  6.00  0.00           H  
ATOM    419  H5'  DG A  13       4.333  27.202 -14.920  5.00  0.00           H  
ATOM    420 H2''  DG A  13       9.053  25.415 -16.290  2.00  0.00           H  
ATOM    421 H5''  DG A  13       5.286  28.526 -15.280  1.00  0.00           H  
ATOM    422  P    DG A  14      10.386  27.440 -14.670  1.00  0.00           P  
ATOM    423  C5'  DG A  14      12.436  25.809 -14.990  7.00  0.00           C  
ATOM    424  O5'  DG A  14      11.049  26.051 -14.890  4.00  0.00           O  
ATOM    425  C4'  DG A  14      12.844  24.353 -14.610  8.00  0.00           C  
ATOM    426  O4'  DG A  14      12.005  23.368 -15.360  6.00  0.00           O  
ATOM    427  C3'  DG A  14      12.442  24.032 -13.140  7.00  0.00           C  
ATOM    428  O3'  DG A  14      13.270  22.944 -12.600  8.00  0.00           O  
ATOM    429  C2'  DG A  14      11.099  23.350 -13.210  7.00  0.00           C  
ATOM    430  C1'  DG A  14      10.920  22.793 -14.610  8.00  0.00           C  
ATOM    431  N1   DG A  14       9.139  18.668 -17.140  5.00  0.00           N  
ATOM    432  C2   DG A  14       8.938  20.068 -17.360  4.00  0.00           C  
ATOM    433  N2   DG A  14       8.235  20.540 -18.390  3.00  0.00           N  
ATOM    434  N3   DG A  14       9.605  20.981 -16.640  8.00  0.00           N  
ATOM    435  C4   DG A  14      10.358  20.510 -15.580  5.00  0.00           C  
ATOM    436  C5   DG A  14      10.509  19.208 -15.260  6.00  0.00           C  
ATOM    437  C6   DG A  14       9.833  18.202 -16.000  0.00  0.00           C  
ATOM    438  O6   DG A  14       9.741  17.022 -15.750  2.00  0.00           O  
ATOM    439  N7   DG A  14      11.354  19.144 -14.130  0.00  0.00           N  
ATOM    440  C8   DG A  14      11.737  20.403 -13.940  0.00  0.00           C  
ATOM    441  N9   DG A  14      11.044  21.318 -14.690  9.00  0.00           N  
ATOM    442  OP1  DG A  14      11.026  27.822 -13.390  4.00  0.00           O  
ATOM    443  OP2  DG A  14      10.455  28.309 -15.900  5.00  0.00           O1-
ATOM    444  H1   DG A  14       8.764  17.960 -17.790  2.00  0.00           H  
ATOM    445  H8   DG A  14      12.439  20.682 -13.160  6.00  0.00           H  
ATOM    446  H1'  DG A  14       9.975  23.137 -15.030  7.00  0.00           H  
ATOM    447  H2'  DG A  14      10.981  22.583 -12.460  0.00  0.00           H  
ATOM    448  H21  DG A  14       7.606  19.872 -18.880  1.00  0.00           H  
ATOM    449  H3'  DG A  14      12.535  24.940 -12.470  0.00  0.00           H  
ATOM    450  H22  DG A  14       8.198  21.443 -18.700  9.00  0.00           H  
ATOM    451  H4'  DG A  14      13.831  24.116 -14.840  0.00  0.00           H  
ATOM    452  H5'  DG A  14      13.061  26.419 -14.330  7.00  0.00           H  
ATOM    453 H2''  DG A  14      10.407  24.083 -13.030  5.00  0.00           H  
ATOM    454 H5''  DG A  14      12.632  26.035 -16.050  2.00  0.00           H  
ATOM    455  P    DG A  15      14.407  23.257 -11.540  5.00  0.00           P  
ATOM    456  C5'  DG A  15      14.092  20.885 -10.520  2.00  0.00           C  
ATOM    457  O5'  DG A  15      14.922  21.784 -11.150  9.00  0.00           O  
ATOM    458  C4'  DG A  15      14.579  19.433 -10.680  9.00  0.00           C  
ATOM    459  O4'  DG A  15      14.185  19.022 -11.950  3.00  0.00           O  
ATOM    460  C3'  DG A  15      16.113  19.185 -10.560  6.00  0.00           C  
ATOM    461  O3'  DG A  15      16.369  18.026  -9.820  0.00  0.00           O  
ATOM    462  C2'  DG A  15      16.592  18.971 -11.970  2.00  0.00           C  
ATOM    463  C1'  DG A  15      15.259  18.502 -12.680  5.00  0.00           C  
ATOM    464  N1   DG A  15      12.964  17.875 -17.300  2.00  0.00           N  
ATOM    465  C2   DG A  15      13.337  16.944 -16.390  1.00  0.00           C  
ATOM    466  N2   DG A  15      12.968  15.684 -16.560  9.00  0.00           N  
ATOM    467  N3   DG A  15      14.077  17.211 -15.270  2.00  0.00           N  
ATOM    468  C4   DG A  15      14.467  18.518 -15.100  1.00  0.00           C  
ATOM    469  C5   DG A  15      14.108  19.545 -15.950  6.00  0.00           C  
ATOM    470  C6   DG A  15      13.253  19.209 -17.100  8.00  0.00           C  
ATOM    471  O6   DG A  15      12.773  19.946 -17.940  0.00  0.00           O  
ATOM    472  N7   DG A  15      14.703  20.763 -15.540  7.00  0.00           N  
ATOM    473  C8   DG A  15      15.218  20.472 -14.360  3.00  0.00           C  
ATOM    474  N9   DG A  15      15.102  19.151 -14.000  4.00  0.00           N  
ATOM    475  OP1  DG A  15      13.831  23.811 -10.320  5.00  0.00           O  
ATOM    476  OP2  DG A  15      15.441  23.963 -12.250  6.00  0.00           O1-
ATOM    477  H1   DG A  15      12.382  17.556 -18.050  9.00  0.00           H  
ATOM    478  H8   DG A  15      15.780  21.224 -13.740  2.00  0.00           H  
ATOM    479  H1'  DG A  15      15.087  17.506 -12.780  5.00  0.00           H  
ATOM    480  H2'  DG A  15      16.990  20.058 -12.220  9.00  0.00           H  
ATOM    481  H21  DG A  15      12.327  15.368 -17.280  9.00  0.00           H  
ATOM    482  H3'  DG A  15      16.562  20.086 -10.160  1.00  0.00           H  
ATOM    483  H22  DG A  15      13.252  15.025 -15.860  9.00  0.00           H  
ATOM    484  H4'  DG A  15      14.054  18.789  -9.930  8.00  0.00           H  
ATOM    485  H5'  DG A  15      13.046  20.820 -10.940  8.00  0.00           H  
ATOM    486 H2''  DG A  15      17.415  18.151 -11.920  7.00  0.00           H  
ATOM    487 H5''  DG A  15      13.946  21.155  -9.470  2.00  0.00           H  
ATOM    488  P    DT A  16      16.744  18.129  -8.230  4.00  0.00           P  
ATOM    489  C5'  DT A  16      19.221  18.481  -8.860  1.00  0.00           C  
ATOM    490  O5'  DT A  16      18.307  17.953  -7.980  3.00  0.00           O  
ATOM    491  C4'  DT A  16      19.769  17.511  -9.890  7.00  0.00           C  
ATOM    492  O4'  DT A  16      20.895  18.106 -10.500  0.00  0.00           O  
ATOM    493  C3'  DT A  16      20.334  16.299  -9.120  0.00  0.00           C  
ATOM    494  O3'  DT A  16      20.450  15.246 -10.060  8.00  0.00           O  
ATOM    495  C2'  DT A  16      21.756  16.688  -8.780  0.00  0.00           C  
ATOM    496  C1'  DT A  16      22.073  17.430 -10.090  9.00  0.00           C  
ATOM    497  N1   DT A  16      23.175  18.343  -9.940  8.00  0.00           N  
ATOM    498  C2   DT A  16      24.449  17.792 -10.060  8.00  0.00           C  
ATOM    499  O2   DT A  16      24.624  16.581  -9.990  6.00  0.00           O  
ATOM    500  N3   DT A  16      25.536  18.625 -10.150  6.00  0.00           N  
ATOM    501  C4   DT A  16      25.455  19.999  -9.760  9.00  0.00           C  
ATOM    502  O4   DT A  16      26.507  20.569  -9.560  5.00  0.00           O  
ATOM    503  C5   DT A  16      24.100  20.547  -9.830  9.00  0.00           C  
ATOM    504  C6   DT A  16      22.989  19.770  -9.910  1.00  0.00           C  
ATOM    505  C7   DT A  16      23.781  22.039  -9.600  9.00  0.00           C  
ATOM    506  OP1  DT A  16      16.066  16.960  -7.730  5.00  0.00           O  
ATOM    507  OP2  DT A  16      16.326  19.461  -7.800  9.00  0.00           O1-
ATOM    508  H3   DT A  16      26.422  18.225 -10.170  6.00  0.00           H  
ATOM    509  H6   DT A  16      21.931  20.165 -10.000  7.00  0.00           H  
ATOM    510  H1'  DT A  16      22.419  16.636 -10.850  1.00  0.00           H  
ATOM    511  H2'  DT A  16      21.864  17.290  -7.900  2.00  0.00           H  
ATOM    512  H3'  DT A  16      19.746  16.114  -8.170  3.00  0.00           H  
ATOM    513  H4'  DT A  16      19.026  17.249 -10.650  2.00  0.00           H  
ATOM    514  H5'  DT A  16      20.056  18.817  -8.210  6.00  0.00           H  
ATOM    515  H71  DT A  16      23.954  22.574 -10.510  8.00  0.00           H  
ATOM    516  H72  DT A  16      22.808  22.176  -9.310  9.00  0.00           H  
ATOM    517  H73  DT A  16      24.501  22.481  -8.910  5.00  0.00           H  
ATOM    518 H2''  DT A  16      22.469  15.799  -8.860  2.00  0.00           H  
ATOM    519 H5''  DT A  16      18.801  19.368  -9.390  6.00  0.00           H  
ATOM    520  P    DT A  17      19.249  14.189 -10.140  4.00  0.00           P  
ATOM    521  C5'  DT A  17      18.687  14.986 -12.640  3.00  0.00           C  
ATOM    522  O5'  DT A  17      19.200  13.983 -11.740  8.00  0.00           O  
ATOM    523  C4'  DT A  17      18.017  14.467 -13.950  1.00  0.00           C  
ATOM    524  O4'  DT A  17      17.485  15.550 -14.650  3.00  0.00           O  
ATOM    525  C3'  DT A  17      18.978  13.761 -14.870  7.00  0.00           C  
ATOM    526  O3'  DT A  17      18.564  12.514 -15.170  7.00  0.00           O  
ATOM    527  C2'  DT A  17      18.872  14.689 -16.080  2.00  0.00           C  
ATOM    528  C1'  DT A  17      17.463  15.218 -16.040  3.00  0.00           C  
ATOM    529  N1   DT A  17      17.244  16.467 -16.910  7.00  0.00           N  
ATOM    530  C2   DT A  17      16.292  16.408 -17.950  2.00  0.00           C  
ATOM    531  O2   DT A  17      15.602  15.429 -18.250  1.00  0.00           O  
ATOM    532  N3   DT A  17      16.058  17.527 -18.690  7.00  0.00           N  
ATOM    533  C4   DT A  17      16.469  18.802 -18.280  5.00  0.00           C  
ATOM    534  O4   DT A  17      16.091  19.805 -18.830  4.00  0.00           O  
ATOM    535  C5   DT A  17      17.382  18.830 -17.070  5.00  0.00           C  
ATOM    536  C6   DT A  17      17.708  17.679 -16.450  9.00  0.00           C  
ATOM    537  C7   DT A  17      18.021  20.130 -16.740  3.00  0.00           C  
ATOM    538  OP1  DT A  17      18.014  14.883  -9.680  6.00  0.00           O  
ATOM    539  OP2  DT A  17      19.652  12.916  -9.430  5.00  0.00           O1-
ATOM    540  H3   DT A  17      15.637  17.371 -19.600  1.00  0.00           H  
ATOM    541  H6   DT A  17      18.317  17.692 -15.570  5.00  0.00           H  
ATOM    542  H1'  DT A  17      16.786  14.392 -16.310  7.00  0.00           H  
ATOM    543  H2'  DT A  17      19.509  15.526 -15.890  7.00  0.00           H  
ATOM    544  H3'  DT A  17      19.983  13.796 -14.340  9.00  0.00           H  
ATOM    545  H4'  DT A  17      17.227  13.810 -13.740  0.00  0.00           H  
ATOM    546  H5'  DT A  17      19.525  15.702 -12.960  6.00  0.00           H  
ATOM    547  H71  DT A  17      17.372  20.859 -16.250  2.00  0.00           H  
ATOM    548  H72  DT A  17      18.593  20.506 -17.620  5.00  0.00           H  
ATOM    549  H73  DT A  17      18.744  19.913 -15.920  4.00  0.00           H  
ATOM    550 H2''  DT A  17      19.091  14.375 -17.080  3.00  0.00           H  
ATOM    551 H5''  DT A  17      17.985  15.616 -12.110  2.00  0.00           H  
ATOM    552  P    DA A  18      19.556  11.352 -15.720  5.00  0.00           P  
ATOM    553  C5'  DA A  18      18.726   9.689 -13.930  8.00  0.00           C  
ATOM    554  O5'  DA A  18      18.702  10.122 -15.280  3.00  0.00           O  
ATOM    555  C4'  DA A  18      17.728   8.511 -13.610  9.00  0.00           C  
ATOM    556  O4'  DA A  18      16.372   8.827 -13.940  5.00  0.00           O  
ATOM    557  C3'  DA A  18      18.087   7.304 -14.480  1.00  0.00           C  
ATOM    558  O3'  DA A  18      17.695   6.060 -13.840  2.00  0.00           O  
ATOM    559  C2'  DA A  18      17.340   7.479 -15.710  0.00  0.00           C  
ATOM    560  C1'  DA A  18      16.126   8.179 -15.140  8.00  0.00           C  
ATOM    561  N1   DA A  18      13.096   8.318 -19.310  4.00  0.00           N  
ATOM    562  C2   DA A  18      13.283   7.331 -18.400  6.00  0.00           C  
ATOM    563  N3   DA A  18      14.085   7.442 -17.320  7.00  0.00           N  
ATOM    564  C4   DA A  18      14.724   8.667 -17.230  7.00  0.00           C  
ATOM    565  C5   DA A  18      14.590   9.743 -18.100  1.00  0.00           C  
ATOM    566  C6   DA A  18      13.691   9.490 -19.210  3.00  0.00           C  
ATOM    567  N6   DA A  18      13.183  10.381 -19.990  1.00  0.00           N  
ATOM    568  N7   DA A  18      15.156  10.855 -17.450  5.00  0.00           N  
ATOM    569  C8   DA A  18      15.724  10.406 -16.320  9.00  0.00           C  
ATOM    570  N9   DA A  18      15.518   9.042 -16.160  0.00  0.00           N  
ATOM    571  OP1  DA A  18      20.868  11.446 -15.140  2.00  0.00           O  
ATOM    572  OP2  DA A  18      19.446  11.388 -17.170  5.00  0.00           O1-
ATOM    573  H2   DA A  18      12.766   6.418 -18.590  6.00  0.00           H  
ATOM    574  H8   DA A  18      16.245  11.028 -15.650  6.00  0.00           H  
ATOM    575  H1'  DA A  18      15.364   7.372 -14.940  4.00  0.00           H  
ATOM    576  H2'  DA A  18      17.856   8.156 -16.360  1.00  0.00           H  
ATOM    577  H3'  DA A  18      19.223   7.396 -14.600  8.00  0.00           H  
ATOM    578  H4'  DA A  18      17.825   8.266 -12.580  5.00  0.00           H  
ATOM    579  H5'  DA A  18      18.479  10.535 -13.300  0.00  0.00           H  
ATOM    580  H61  DA A  18      12.519  10.112 -20.650  0.00  0.00           H  
ATOM    581  H62  DA A  18      13.432  11.358 -20.040  6.00  0.00           H  
ATOM    582 H2''  DA A  18      17.174   6.480 -16.190  7.00  0.00           H  
ATOM    583 H5''  DA A  18      19.749   9.301 -13.650  5.00  0.00           H  
ATOM    584  P    DG A  19      18.362   5.586 -12.420  0.00  0.00           P  
ATOM    585  C5'  DG A  19      16.262   6.260 -11.020  3.00  0.00           C  
ATOM    586  O5'  DG A  19      17.567   6.425 -11.200  9.00  0.00           O  
ATOM    587  C4'  DG A  19      15.745   7.374 -10.120  0.00  0.00           C  
ATOM    588  O4'  DG A  19      16.106   8.632 -10.660  0.00  0.00           O  
ATOM    589  C3'  DG A  19      14.251   7.216  -9.890  1.00  0.00           C  
ATOM    590  O3'  DG A  19      13.754   7.644  -8.600  7.00  0.00           O  
ATOM    591  C2'  DG A  19      13.843   8.219 -10.960  0.00  0.00           C  
ATOM    592  C1'  DG A  19      14.805   9.323 -10.730  6.00  0.00           C  
ATOM    593  N1   DG A  19      12.860  11.528 -15.030  7.00  0.00           N  
ATOM    594  C2   DG A  19      12.616  10.289 -14.460  2.00  0.00           C  
ATOM    595  N2   DG A  19      11.885   9.483 -15.200  6.00  0.00           N  
ATOM    596  N3   DG A  19      13.182   9.796 -13.350  8.00  0.00           N  
ATOM    597  C4   DG A  19      14.019  10.717 -12.790  8.00  0.00           C  
ATOM    598  C5   DG A  19      14.347  11.960 -13.290  1.00  0.00           C  
ATOM    599  C6   DG A  19      13.711  12.428 -14.460  1.00  0.00           C  
ATOM    600  O6   DG A  19      13.662  13.600 -14.880  3.00  0.00           O  
ATOM    601  N7   DG A  19      15.248  12.615 -12.470  6.00  0.00           N  
ATOM    602  C8   DG A  19      15.471  11.633 -11.590  2.00  0.00           C  
ATOM    603  N9   DG A  19      14.817  10.470 -11.700  3.00  0.00           N  
ATOM    604  OP1  DG A  19      19.740   6.088 -12.320  7.00  0.00           O  
ATOM    605  OP2  DG A  19      18.072   4.144 -12.250  7.00  0.00           O1-
ATOM    606  H1   DG A  19      12.297  11.816 -15.840  2.00  0.00           H  
ATOM    607  H8   DG A  19      16.142  11.790 -10.750  2.00  0.00           H  
ATOM    608  H1'  DG A  19      14.523   9.733  -9.760  0.00  0.00           H  
ATOM    609  H2'  DG A  19      14.065   7.939 -11.990  8.00  0.00           H  
ATOM    610  H21  DG A  19      11.352   9.883 -15.990  8.00  0.00           H  
ATOM    611  H3'  DG A  19      13.957   6.219 -10.220  6.00  0.00           H  
ATOM    612  H22  DG A  19      11.842   8.480 -14.970  9.00  0.00           H  
ATOM    613  H4'  DG A  19      16.419   7.252  -9.230  6.00  0.00           H  
ATOM    614  H5'  DG A  19      16.070   5.316 -10.560  0.00  0.00           H  
ATOM    615 H2''  DG A  19      12.855   8.515 -10.910  9.00  0.00           H  
ATOM    616 H5''  DG A  19      15.752   6.231 -11.950  3.00  0.00           H  
ATOM    617  P    DG A  20      12.239   7.415  -8.110  8.00  0.00           P  
ATOM    618  C5'  DG A  20      11.135   9.827  -8.160  8.00  0.00           C  
ATOM    619  O5'  DG A  20      11.414   8.584  -8.760  3.00  0.00           O  
ATOM    620  C4'  DG A  20      12.279  10.752  -8.140  5.00  0.00           C  
ATOM    621  O4'  DG A  20      12.602  11.179  -9.430  4.00  0.00           O  
ATOM    622  C3'  DG A  20      12.132  12.020  -7.220  0.00  0.00           C  
ATOM    623  O3'  DG A  20      13.371  12.470  -6.790  0.00  0.00           O  
ATOM    624  C2'  DG A  20      11.528  12.870  -8.320  2.00  0.00           C  
ATOM    625  C1'  DG A  20      12.163  12.495  -9.650  3.00  0.00           C  
ATOM    626  N1   DG A  20      11.030  15.255 -13.840  1.00  0.00           N  
ATOM    627  C2   DG A  20      11.861  15.544 -12.820  0.00  0.00           C  
ATOM    628  N2   DG A  20      12.140  16.806 -12.830  3.00  0.00           N  
ATOM    629  N3   DG A  20      11.923  14.869 -11.660  2.00  0.00           N  
ATOM    630  C4   DG A  20      11.260  13.657 -11.740  9.00  0.00           C  
ATOM    631  C5   DG A  20      10.464  13.240 -12.780  6.00  0.00           C  
ATOM    632  C6   DG A  20      10.274  14.071 -13.910  2.00  0.00           C  
ATOM    633  O6   DG A  20       9.522  13.934 -14.870  8.00  0.00           O  
ATOM    634  N7   DG A  20       9.926  11.979 -12.520  1.00  0.00           N  
ATOM    635  C8   DG A  20      10.526  11.628 -11.420  8.00  0.00           C  
ATOM    636  N9   DG A  20      11.300  12.569 -10.830  5.00  0.00           N  
ATOM    637  OP1  DG A  20      12.170   7.590  -6.700  0.00  0.00           O  
ATOM    638  OP2  DG A  20      11.744   6.139  -8.680  4.00  0.00           O1-
ATOM    639  H1   DG A  20      10.871  15.951 -14.530  9.00  0.00           H  
ATOM    640  H8   DG A  20      10.356  10.651 -10.930  4.00  0.00           H  
ATOM    641  H1'  DG A  20      13.098  13.094  -9.840  5.00  0.00           H  
ATOM    642  H2'  DG A  20      10.500  12.757  -8.400  6.00  0.00           H  
ATOM    643  H21  DG A  20      11.926  17.301 -13.630  6.00  0.00           H  
ATOM    644  H3'  DG A  20      11.496  11.808  -6.380  2.00  0.00           H  
ATOM    645  H22  DG A  20      12.704  17.228 -12.080  1.00  0.00           H  
ATOM    646  H4'  DG A  20      13.097  10.105  -7.820  7.00  0.00           H  
ATOM    647  H5'  DG A  20      10.779   9.703  -7.110  2.00  0.00           H  
ATOM    648 H2''  DG A  20      11.701  13.945  -8.150  1.00  0.00           H  
ATOM    649 H5''  DG A  20      10.160  10.292  -8.550  2.00  0.00           H  
ATOM    650  P    DG A  21      13.857  12.315  -5.340  6.00  0.00           P  
ATOM    651  C5'  DG A  21      12.481  14.361  -4.730  7.00  0.00           C  
ATOM    652  O5'  DG A  21      12.781  12.971  -4.410  0.00  0.00           O  
ATOM    653  C4'  DG A  21      11.106  14.927  -4.110  0.00  0.00           C  
ATOM    654  O4'  DG A  21      10.788  16.138  -4.780  5.00  0.00           O  
ATOM    655  C3'  DG A  21       9.909  13.970  -4.160  9.00  0.00           C  
ATOM    656  O3'  DG A  21       8.946  14.287  -3.170  4.00  0.00           O  
ATOM    657  C2'  DG A  21       9.416  14.474  -5.460  3.00  0.00           C  
ATOM    658  C1'  DG A  21       9.566  16.009  -5.480  6.00  0.00           C  
ATOM    659  N1   DG A  21       8.333  15.691 -10.600  1.00  0.00           N  
ATOM    660  C2   DG A  21       8.433  14.697  -9.670  6.00  0.00           C  
ATOM    661  N2   DG A  21       8.099  13.573 -10.120  2.00  0.00           N  
ATOM    662  N3   DG A  21       8.714  14.890  -8.360  7.00  0.00           N  
ATOM    663  C4   DG A  21       8.996  16.185  -8.060  7.00  0.00           C  
ATOM    664  C5   DG A  21       9.042  17.269  -8.900  2.00  0.00           C  
ATOM    665  C6   DG A  21       8.701  17.023 -10.290  7.00  0.00           C  
ATOM    666  O6   DG A  21       8.675  17.842 -11.210  1.00  0.00           O  
ATOM    667  N7   DG A  21       9.301  18.481  -8.210  4.00  0.00           N  
ATOM    668  C8   DG A  21       9.630  18.000  -7.050  1.00  0.00           C  
ATOM    669  N9   DG A  21       9.483  16.663  -6.850  9.00  0.00           N  
ATOM    670  OP1  DG A  21      15.093  13.109  -5.200  9.00  0.00           O  
ATOM    671  OP2  DG A  21      13.812  10.880  -5.060  8.00  0.00           O1-
ATOM    672  H1   DG A  21       8.190  15.497 -11.570  2.00  0.00           H  
ATOM    673  H8   DG A  21       9.764  18.674  -6.260  5.00  0.00           H  
ATOM    674  H1'  DG A  21       8.798  16.620  -4.830  9.00  0.00           H  
ATOM    675  H2'  DG A  21       9.931  14.169  -6.320  5.00  0.00           H  
ATOM    676  H21  DG A  21       7.838  13.404 -11.070  8.00  0.00           H  
ATOM    677  H3'  DG A  21      10.163  12.913  -4.060  3.00  0.00           H  
ATOM    678  H22  DG A  21       8.039  12.825  -9.430  9.00  0.00           H  
ATOM    679  H4'  DG A  21      11.269  15.244  -3.100  6.00  0.00           H  
ATOM    680  H5'  DG A  21      12.449  14.445  -5.870  7.00  0.00           H  
ATOM    681 H2''  DG A  21       8.397  14.227  -5.640  5.00  0.00           H  
ATOM    682 H5''  DG A  21      13.375  14.956  -4.420  7.00  0.00           H  
ATOM    683  P    DT A  22       7.823  13.232  -2.780  1.00  0.00           P  
ATOM    684  C5'  DT A  22       5.978  14.224  -4.300  2.00  0.00           C  
ATOM    685  O5'  DT A  22       6.829  13.115  -3.980  0.00  0.00           O  
ATOM    686  C4'  DT A  22       4.685  13.814  -4.930  0.00  0.00           C  
ATOM    687  O4'  DT A  22       4.123  14.922  -5.590  0.00  0.00           O  
ATOM    688  C3'  DT A  22       4.828  12.756  -6.080  7.00  0.00           C  
ATOM    689  O3'  DT A  22       3.506  12.238  -6.370  1.00  0.00           O  
ATOM    690  C2'  DT A  22       5.237  13.621  -7.220  6.00  0.00           C  
ATOM    691  C1'  DT A  22       4.306  14.865  -6.990  0.00  0.00           C  
ATOM    692  N1   DT A  22       4.920  16.108  -7.530  9.00  0.00           N  
ATOM    693  C2   DT A  22       4.759  16.320  -8.840  9.00  0.00           C  
ATOM    694  O2   DT A  22       4.269  15.498  -9.590  7.00  0.00           O  
ATOM    695  N3   DT A  22       5.156  17.539  -9.340  4.00  0.00           N  
ATOM    696  C4   DT A  22       5.767  18.535  -8.590  9.00  0.00           C  
ATOM    697  O4   DT A  22       6.016  19.596  -9.170  1.00  0.00           O  
ATOM    698  C5   DT A  22       5.820  18.231  -7.170  0.00  0.00           C  
ATOM    699  C6   DT A  22       5.452  17.050  -6.690  0.00  0.00           C  
ATOM    700  C7   DT A  22       6.166  19.335  -6.130  9.00  0.00           C  
ATOM    701  OP1  DT A  22       7.151  13.820  -1.600  3.00  0.00           O  
ATOM    702  OP2  DT A  22       8.470  11.914  -2.510  7.00  0.00           O1-
ATOM    703  H3   DT A  22       5.071  17.699 -10.310  7.00  0.00           H  
ATOM    704  H6   DT A  22       5.390  16.921  -5.640  4.00  0.00           H  
ATOM    705  H1'  DT A  22       3.368  14.680  -7.570  0.00  0.00           H  
ATOM    706  H2'  DT A  22       6.266  13.935  -7.000  0.00  0.00           H  
ATOM    707  H3'  DT A  22       5.570  11.990  -5.940  0.00  0.00           H  
ATOM    708  H4'  DT A  22       4.012  13.344  -4.210  2.00  0.00           H  
ATOM    709  H5'  DT A  22       6.415  14.964  -4.960  9.00  0.00           H  
ATOM    710  H71  DT A  22       5.490  20.171  -6.260  4.00  0.00           H  
ATOM    711  H72  DT A  22       6.232  18.936  -5.100  5.00  0.00           H  
ATOM    712  H73  DT A  22       7.082  19.720  -6.520  5.00  0.00           H  
ATOM    713 H2''  DT A  22       5.132  13.131  -8.180  9.00  0.00           H  
ATOM    714 H5''  DT A  22       5.646  14.726  -3.370  2.00  0.00           H  
ATOM    715  P    DT A  23       3.275  10.903  -7.060  0.00  0.00           P  
ATOM    716  C5'  DT A  23       2.062  12.319  -8.880  3.00  0.00           C  
ATOM    717  O5'  DT A  23       3.124  11.427  -8.490  1.00  0.00           O  
ATOM    718  C4'  DT A  23       0.819  11.519  -9.400  9.00  0.00           C  
ATOM    719  O4'  DT A  23      -0.222  12.546  -9.660  0.00  0.00           O  
ATOM    720  C3'  DT A  23       1.077  10.861 -10.840  1.00  0.00           C  
ATOM    721  O3'  DT A  23       0.225   9.828 -11.230  2.00  0.00           O  
ATOM    722  C2'  DT A  23       0.947  12.103 -11.620  7.00  0.00           C  
ATOM    723  C1'  DT A  23      -0.228  12.791 -11.050  5.00  0.00           C  
ATOM    724  N1   DT A  23      -0.342  14.207 -11.450  1.00  0.00           N  
ATOM    725  C2   DT A  23      -1.323  14.601 -12.350  0.00  0.00           C  
ATOM    726  O2   DT A  23      -2.020  13.785 -12.880  9.00  0.00           O  
ATOM    727  N3   DT A  23      -1.377  15.968 -12.740  4.00  0.00           N  
ATOM    728  C4   DT A  23      -0.475  16.987 -12.350  4.00  0.00           C  
ATOM    729  O4   DT A  23      -0.614  18.134 -12.800  9.00  0.00           O  
ATOM    730  C5   DT A  23       0.568  16.419 -11.550  7.00  0.00           C  
ATOM    731  C6   DT A  23       0.585  15.131 -11.090  6.00  0.00           C  
ATOM    732  C7   DT A  23       1.617  17.319 -11.020  2.00  0.00           C  
ATOM    733  OP1  DT A  23       1.966  10.342  -6.720  7.00  0.00           O  
ATOM    734  OP2  DT A  23       4.476   9.991  -6.890  2.00  0.00           O1-
ATOM    735  H3   DT A  23      -2.194  16.134 -13.340  0.00  0.00           H  
ATOM    736  H6   DT A  23       1.419  14.827 -10.450  9.00  0.00           H  
ATOM    737  H1'  DT A  23      -1.114  12.255 -11.490  3.00  0.00           H  
ATOM    738  H2'  DT A  23       1.871  12.723 -11.570  9.00  0.00           H  
ATOM    739  H3'  DT A  23       2.093  10.466 -10.940  4.00  0.00           H  
ATOM    740  H4'  DT A  23       0.623  10.691  -8.670  8.00  0.00           H  
ATOM    741  H5'  DT A  23       2.593  13.004  -9.560  5.00  0.00           H  
ATOM    742  H71  DT A  23       2.265  16.851 -10.340  0.00  0.00           H  
ATOM    743  H72  DT A  23       2.149  17.876 -11.800  7.00  0.00           H  
ATOM    744  H73  DT A  23       1.058  18.091 -10.440  5.00  0.00           H  
ATOM    745 H2''  DT A  23       0.676  11.905 -12.650  8.00  0.00           H  
ATOM    746 H5''  DT A  23       1.752  12.751  -7.950  3.00  0.00           H  
ATOM    747  P    DA A  24       0.649   8.774 -12.380  0.00  0.00           P  
ATOM    748  C5'  DA A  24      -0.904   9.631 -14.350  5.00  0.00           C  
ATOM    749  O5'  DA A  24       0.395   9.529 -13.810  8.00  0.00           O  
ATOM    750  C4'  DA A  24      -0.980  10.510 -15.590  7.00  0.00           C  
ATOM    751  O4'  DA A  24      -1.187  11.875 -15.300  9.00  0.00           O  
ATOM    752  C3'  DA A  24       0.316  10.489 -16.410  5.00  0.00           C  
ATOM    753  O3'  DA A  24       0.067  10.212 -17.800  6.00  0.00           O  
ATOM    754  C2'  DA A  24       0.907  11.865 -16.160  6.00  0.00           C  
ATOM    755  C1'  DA A  24      -0.374  12.671 -16.170  7.00  0.00           C  
ATOM    756  N1   DA A  24       2.705  16.351 -14.270  3.00  0.00           N  
ATOM    757  C2   DA A  24       2.631  15.050 -13.980  6.00  0.00           C  
ATOM    758  N3   DA A  24       1.797  14.125 -14.430  2.00  0.00           N  
ATOM    759  C4   DA A  24       0.817  14.674 -15.210  0.00  0.00           C  
ATOM    760  C5   DA A  24       0.704  16.003 -15.510  1.00  0.00           C  
ATOM    761  C6   DA A  24       1.714  16.873 -14.980  6.00  0.00           C  
ATOM    762  N6   DA A  24       1.838  18.172 -15.100  7.00  0.00           N  
ATOM    763  N7   DA A  24      -0.521  16.223 -16.140  7.00  0.00           N  
ATOM    764  C8   DA A  24      -1.049  15.042 -16.240  4.00  0.00           C  
ATOM    765  N9   DA A  24      -0.308  14.041 -15.720  1.00  0.00           N  
ATOM    766  OP1  DA A  24      -0.342   7.648 -12.280  3.00  0.00           O  
ATOM    767  OP2  DA A  24       2.069   8.466 -12.180  8.00  0.00           O1-
ATOM    768  H2   DA A  24       3.446  14.641 -13.460  3.00  0.00           H  
ATOM    769  H8   DA A  24      -2.043  14.909 -16.680  5.00  0.00           H  
ATOM    770  H1'  DA A  24      -0.736  12.620 -17.210  1.00  0.00           H  
ATOM    771  H2'  DA A  24       1.389  11.891 -15.190  1.00  0.00           H  
ATOM    772  H3'  DA A  24       0.997   9.796 -16.010  1.00  0.00           H  
ATOM    773  H4'  DA A  24      -1.770  10.201 -16.230  7.00  0.00           H  
ATOM    774  H5'  DA A  24      -1.456  10.014 -13.530  0.00  0.00           H  
ATOM    775  H61  DA A  24       2.624  18.652 -14.690  2.00  0.00           H  
ATOM    776  H62  DA A  24       1.113  18.649 -15.550  5.00  0.00           H  
ATOM    777 H2''  DA A  24       1.557  12.142 -17.030  3.00  0.00           H  
ATOM    778 H5''  DA A  24      -1.326   8.650 -14.550  6.00  0.00           H  
ATOM    779  P    DG A  25       1.132  10.136 -18.940  6.00  0.00           P  
ATOM    780  C5'  DG A  25       0.284  12.329 -20.200  8.00  0.00           C  
ATOM    781  O5'  DG A  25       1.267  11.632 -19.370  3.00  0.00           O  
ATOM    782  C4'  DG A  25       0.625  13.836 -20.520  2.00  0.00           C  
ATOM    783  O4'  DG A  25       0.726  14.666 -19.300  3.00  0.00           O  
ATOM    784  C3'  DG A  25       1.855  13.970 -21.360  9.00  0.00           C  
ATOM    785  O3'  DG A  25       1.487  13.652 -22.690  7.00  0.00           O  
ATOM    786  C2'  DG A  25       2.207  15.405 -21.080  5.00  0.00           C  
ATOM    787  C1'  DG A  25       1.809  15.540 -19.590  0.00  0.00           C  
ATOM    788  N1   DG A  25       5.353  17.481 -16.460  6.00  0.00           N  
ATOM    789  C2   DG A  25       4.390  18.181 -17.180  1.00  0.00           C  
ATOM    790  N2   DG A  25       4.462  19.483 -17.220  9.00  0.00           N  
ATOM    791  N3   DG A  25       3.563  17.548 -17.990  7.00  0.00           N  
ATOM    792  C4   DG A  25       3.646  16.191 -17.960  7.00  0.00           C  
ATOM    793  C5   DG A  25       4.485  15.428 -17.210  6.00  0.00           C  
ATOM    794  C6   DG A  25       5.535  16.094 -16.480  5.00  0.00           C  
ATOM    795  O6   DG A  25       6.477  15.643 -15.820  8.00  0.00           O  
ATOM    796  N7   DG A  25       4.292  14.090 -17.490  3.00  0.00           N  
ATOM    797  C8   DG A  25       3.381  13.962 -18.380  7.00  0.00           C  
ATOM    798  N9   DG A  25       2.916  15.224 -18.720  1.00  0.00           N  
ATOM    799  OP1  DG A  25       0.583   9.375 -20.120  8.00  0.00           O  
ATOM    800  OP2  DG A  25       2.363   9.681 -18.240  5.00  0.00           O1-
ATOM    801  H1   DG A  25       5.952  18.071 -15.900  1.00  0.00           H  
ATOM    802  H8   DG A  25       3.063  13.111 -18.920  7.00  0.00           H  
ATOM    803  H1'  DG A  25       1.450  16.534 -19.450  3.00  0.00           H  
ATOM    804  H2'  DG A  25       3.253  15.557 -21.240  0.00  0.00           H  
ATOM    805  H21  DG A  25       4.960  19.963 -16.550  1.00  0.00           H  
ATOM    806  H3'  DG A  25       2.715  13.370 -20.920  8.00  0.00           H  
ATOM    807  H22  DG A  25       3.943  19.919 -17.960  1.00  0.00           H  
ATOM    808  H4'  DG A  25      -0.195  14.148 -21.120  5.00  0.00           H  
ATOM    809  H5'  DG A  25      -0.649  12.402 -19.710  5.00  0.00           H  
ATOM    810 H2''  DG A  25       1.605  16.111 -21.650  8.00  0.00           H  
ATOM    811 H5''  DG A  25      -0.045  11.821 -21.080  8.00  0.00           H  
ATOM    812  P    DG A  26       2.613  13.587 -23.880  2.00  0.00           P  
ATOM    813  C5'  DG A  26       2.684  16.233 -24.450  8.00  0.00           C  
ATOM    814  O5'  DG A  26       3.226  15.057 -23.860  6.00  0.00           O  
ATOM    815  C4'  DG A  26       3.408  17.608 -24.490  1.00  0.00           C  
ATOM    816  O4'  DG A  26       3.861  17.922 -23.210  4.00  0.00           O  
ATOM    817  C3'  DG A  26       4.541  17.491 -25.470  7.00  0.00           C  
ATOM    818  O3'  DG A  26       4.694  18.662 -26.290  6.00  0.00           O  
ATOM    819  C2'  DG A  26       5.761  17.330 -24.570  0.00  0.00           C  
ATOM    820  C1'  DG A  26       5.229  18.301 -23.440  1.00  0.00           C  
ATOM    821  N1   DG A  26       6.939  15.047 -19.760  2.00  0.00           N  
ATOM    822  C2   DG A  26       6.265  14.764 -20.860  1.00  0.00           C  
ATOM    823  N2   DG A  26       5.897  13.494 -21.060  4.00  0.00           N  
ATOM    824  N3   DG A  26       5.888  15.650 -21.760  9.00  0.00           N  
ATOM    825  C4   DG A  26       6.210  16.966 -21.480  8.00  0.00           C  
ATOM    826  C5   DG A  26       6.935  17.354 -20.330  0.00  0.00           C  
ATOM    827  C6   DG A  26       7.259  16.318 -19.360  5.00  0.00           C  
ATOM    828  O6   DG A  26       7.880  16.404 -18.350  2.00  0.00           O  
ATOM    829  N7   DG A  26       7.082  18.749 -20.290  0.00  0.00           N  
ATOM    830  C8   DG A  26       6.426  19.162 -21.340  4.00  0.00           C  
ATOM    831  N9   DG A  26       5.951  18.133 -22.170  7.00  0.00           N  
ATOM    832  OP1  DG A  26       2.031  13.332 -25.180  8.00  0.00           O  
ATOM    833  OP2  DG A  26       3.733  12.799 -23.410  4.00  0.00           O1-
ATOM    834  H1   DG A  26       7.149  14.266 -19.120  4.00  0.00           H  
ATOM    835  H8   DG A  26       6.320  20.159 -21.610  1.00  0.00           H  
ATOM    836  H1'  DG A  26       5.396  19.275 -23.870  5.00  0.00           H  
ATOM    837  H2'  DG A  26       5.893  16.279 -24.290  4.00  0.00           H  
ATOM    838  H21  DG A  26       5.972  12.844 -20.310  3.00  0.00           H  
ATOM    839  H3'  DG A  26       4.412  16.595 -26.170  0.00  0.00           H  
ATOM    840  H22  DG A  26       5.241  13.329 -21.880  0.00  0.00           H  
ATOM    841  H4'  DG A  26       2.735  18.373 -24.860  3.00  0.00           H  
ATOM    842  H5'  DG A  26       1.681  16.451 -23.980  0.00  0.00           H  
ATOM    843 H2''  DG A  26       6.656  17.741 -25.080  1.00  0.00           H  
ATOM    844 H5''  DG A  26       2.380  15.884 -25.490  2.00  0.00           H  
ATOM    845  P    DG A  27       5.531  18.670 -27.720  0.00  0.00           P  
ATOM    846  C5'  DG A  27       6.895  20.703 -26.660  9.00  0.00           C  
ATOM    847  O5'  DG A  27       6.879  19.349 -27.100  0.00  0.00           O  
ATOM    848  C4'  DG A  27       8.252  21.260 -25.990  7.00  0.00           C  
ATOM    849  O4'  DG A  27       8.423  20.637 -24.720  2.00  0.00           O  
ATOM    850  C3'  DG A  27       9.449  20.952 -26.820  1.00  0.00           C  
ATOM    851  O3'  DG A  27      10.421  22.001 -26.890  3.00  0.00           O  
ATOM    852  C2'  DG A  27      10.141  19.777 -26.100  1.00  0.00           C  
ATOM    853  C1'  DG A  27       9.756  20.202 -24.660  4.00  0.00           C  
ATOM    854  N1   DG A  27      10.865  19.149 -19.850  6.00  0.00           N  
ATOM    855  C2   DG A  27      10.861  20.334 -20.500  3.00  0.00           C  
ATOM    856  N2   DG A  27      11.131  21.330 -19.800  0.00  0.00           N  
ATOM    857  N3   DG A  27      10.389  20.470 -21.770  4.00  0.00           N  
ATOM    858  C4   DG A  27      10.092  19.313 -22.350  8.00  0.00           C  
ATOM    859  C5   DG A  27      10.061  18.079 -21.710  0.00  0.00           C  
ATOM    860  C6   DG A  27      10.421  17.944 -20.340  2.00  0.00           C  
ATOM    861  O6   DG A  27      10.553  16.956 -19.610  4.00  0.00           O  
ATOM    862  N7   DG A  27       9.556  17.130 -22.630  6.00  0.00           N  
ATOM    863  C8   DG A  27       9.464  17.789 -23.750  8.00  0.00           C  
ATOM    864  N9   DG A  27       9.731  19.131 -23.670  0.00  0.00           N  
ATOM    865  OP1  DG A  27       5.057  19.573 -28.770  2.00  0.00           O  
ATOM    866  OP2  DG A  27       5.862  17.264 -27.980  1.00  0.00           O1-
ATOM    867  H1   DG A  27      11.369  19.076 -19.030  5.00  0.00           H  
ATOM    868  H8   DG A  27       9.150  17.285 -24.680  1.00  0.00           H  
ATOM    869  H1'  DG A  27      10.539  20.949 -24.320  3.00  0.00           H  
ATOM    870  H2'  DG A  27       9.684  18.862 -26.360  5.00  0.00           H  
ATOM    871  H21  DG A  27      11.605  21.160 -18.900  6.00  0.00           H  
ATOM    872  H3'  DG A  27       9.218  20.590 -27.830  8.00  0.00           H  
ATOM    873  H22  DG A  27      11.204  22.285 -20.130  1.00  0.00           H  
ATOM    874  H4'  DG A  27       8.223  22.374 -25.870  8.00  0.00           H  
ATOM    875  H5'  DG A  27       6.091  21.015 -26.000  6.00  0.00           H  
ATOM    876 H2''  DG A  27      11.207  19.746 -26.120  2.00  0.00           H  
ATOM    877 H5''  DG A  27       6.839  21.329 -27.560  5.00  0.00           H  
ATOM    878  P    DT A  28      11.345  22.230 -28.200  8.00  0.00           P  
ATOM    879  C5'  DT A  28      13.963  21.786 -28.580  0.00  0.00           C  
ATOM    880  O5'  DT A  28      12.705  21.440 -27.950  4.00  0.00           O  
ATOM    881  C4'  DT A  28      15.099  21.632 -27.570  8.00  0.00           C  
ATOM    882  O4'  DT A  28      14.988  22.473 -26.500  6.00  0.00           O  
ATOM    883  C3'  DT A  28      15.183  20.190 -27.030  4.00  0.00           C  
ATOM    884  O3'  DT A  28      16.539  19.907 -26.720  1.00  0.00           O  
ATOM    885  C2'  DT A  28      14.467  20.298 -25.700  6.00  0.00           C  
ATOM    886  C1'  DT A  28      14.987  21.671 -25.310  3.00  0.00           C  
ATOM    887  N1   DT A  28      14.092  22.271 -24.310  8.00  0.00           N  
ATOM    888  C2   DT A  28      14.482  22.142 -22.970  8.00  0.00           C  
ATOM    889  O2   DT A  28      15.439  21.507 -22.610  0.00  0.00           O  
ATOM    890  N3   DT A  28      13.643  22.657 -22.020  2.00  0.00           N  
ATOM    891  C4   DT A  28      12.514  23.313 -22.310  4.00  0.00           C  
ATOM    892  O4   DT A  28      11.871  23.855 -21.430  6.00  0.00           O  
ATOM    893  C5   DT A  28      12.225  23.520 -23.770  1.00  0.00           C  
ATOM    894  C6   DT A  28      12.906  22.892 -24.720  3.00  0.00           C  
ATOM    895  C7   DT A  28      11.067  24.274 -24.280  4.00  0.00           C  
ATOM    896  OP1  DT A  28      11.591  23.624 -28.340  0.00  0.00           O  
ATOM    897  OP2  DT A  28      10.682  21.536 -29.300  7.00  0.00           O1-
ATOM    898  H3   DT A  28      13.938  22.497 -21.030  5.00  0.00           H  
ATOM    899  H6   DT A  28      12.656  22.963 -25.740  0.00  0.00           H  
ATOM    900  H1'  DT A  28      15.979  21.509 -24.970  5.00  0.00           H  
ATOM    901  H2'  DT A  28      13.353  20.323 -25.760  4.00  0.00           H  
ATOM    902  H3'  DT A  28      14.750  19.401 -27.590  5.00  0.00           H  
ATOM    903  H4'  DT A  28      15.984  21.851 -28.190  9.00  0.00           H  
ATOM    904  H5'  DT A  28      13.927  22.867 -28.850  7.00  0.00           H  
ATOM    905  H71  DT A  28      10.204  23.611 -24.610  8.00  0.00           H  
ATOM    906  H72  DT A  28      10.696  25.041 -23.540  5.00  0.00           H  
ATOM    907  H73  DT A  28      11.438  24.872 -25.070  5.00  0.00           H  
ATOM    908 H2''  DT A  28      14.783  19.458 -25.120  5.00  0.00           H  
ATOM    909 H5''  DT A  28      14.182  21.168 -29.480  2.00  0.00           H  
ATOM    910  P    DT A  29      17.424  19.398 -27.920  5.00  0.00           P  
ATOM    911  C5'  DT A  29      17.590  16.924 -28.840  4.00  0.00           C  
ATOM    912  O5'  DT A  29      16.950  17.877 -27.990  2.00  0.00           O  
ATOM    913  C4'  DT A  29      16.895  15.588 -28.750  5.00  0.00           C  
ATOM    914  O4'  DT A  29      17.226  15.002 -27.470  2.00  0.00           O  
ATOM    915  C3'  DT A  29      15.290  15.631 -28.840  7.00  0.00           C  
ATOM    916  O3'  DT A  29      14.606  14.493 -29.420  2.00  0.00           O  
ATOM    917  C2'  DT A  29      14.891  15.654 -27.330  9.00  0.00           C  
ATOM    918  C1'  DT A  29      15.995  14.832 -26.640  2.00  0.00           C  
ATOM    919  N1   DT A  29      16.200  15.291 -25.250  6.00  0.00           N  
ATOM    920  C2   DT A  29      15.969  14.369 -24.260  9.00  0.00           C  
ATOM    921  O2   DT A  29      15.708  13.147 -24.420  6.00  0.00           O  
ATOM    922  N3   DT A  29      16.028  14.880 -23.000  0.00  0.00           N  
ATOM    923  C4   DT A  29      16.462  16.052 -22.650  1.00  0.00           C  
ATOM    924  O4   DT A  29      16.497  16.284 -21.450  7.00  0.00           O  
ATOM    925  C5   DT A  29      16.931  16.912 -23.720  7.00  0.00           C  
ATOM    926  C6   DT A  29      16.785  16.548 -25.000  5.00  0.00           C  
ATOM    927  C7   DT A  29      17.577  18.210 -23.370  8.00  0.00           C  
ATOM    928  OP1  DT A  29      18.829  19.417 -27.590  4.00  0.00           O  
ATOM    929  OP2  DT A  29      17.048  19.971 -29.190  8.00  0.00           O1-
ATOM    930  H3   DT A  29      15.899  14.261 -22.190  3.00  0.00           H  
ATOM    931  H6   DT A  29      17.139  17.116 -25.940  4.00  0.00           H  
ATOM    932  H1'  DT A  29      15.676  13.813 -26.640  1.00  0.00           H  
ATOM    933  H2'  DT A  29      14.759  16.691 -27.150  3.00  0.00           H  
ATOM    934  H3'  DT A  29      15.003  16.579 -29.290  7.00  0.00           H  
ATOM    935  H4'  DT A  29      17.361  14.886 -29.500  0.00  0.00           H  
ATOM    936  H5'  DT A  29      18.647  16.930 -28.600  8.00  0.00           H  
ATOM    937  H71  DT A  29      16.896  18.690 -22.740  3.00  0.00           H  
ATOM    938  H72  DT A  29      18.583  18.124 -22.830  8.00  0.00           H  
ATOM    939  H73  DT A  29      17.619  18.857 -24.190  3.00  0.00           H  
ATOM    940 H2''  DT A  29      13.915  15.194 -27.040  3.00  0.00           H  
ATOM    941 H5''  DT A  29      17.414  17.346 -29.810  4.00  0.00           H  
ATOM    942  P    DA A  30      12.949  14.374 -29.570  7.00  0.00           P  
ATOM    943  C5'  DA A  30      12.618  12.915 -27.440  4.00  0.00           C  
ATOM    944  O5'  DA A  30      12.247  14.088 -28.130  7.00  0.00           O  
ATOM    945  C4'  DA A  30      11.951  12.920 -25.990  9.00  0.00           C  
ATOM    946  O4'  DA A  30      12.701  13.726 -25.150  7.00  0.00           O  
ATOM    947  C3'  DA A  30      10.472  13.302 -25.950  9.00  0.00           C  
ATOM    948  O3'  DA A  30       9.719  12.367 -25.270  6.00  0.00           O  
ATOM    949  C2'  DA A  30      10.545  14.582 -25.120  8.00  0.00           C  
ATOM    950  C1'  DA A  30      11.799  14.371 -24.300  3.00  0.00           C  
ATOM    951  N1   DA A  30      13.784  17.062 -20.330  4.00  0.00           N  
ATOM    952  C2   DA A  30      13.276  15.867 -20.440  1.00  0.00           C  
ATOM    953  N3   DA A  30      12.803  15.222 -21.470  4.00  0.00           N  
ATOM    954  C4   DA A  30      12.858  16.009 -22.570  8.00  0.00           C  
ATOM    955  C5   DA A  30      13.262  17.304 -22.610  6.00  0.00           C  
ATOM    956  C6   DA A  30      13.856  17.784 -21.420  9.00  0.00           C  
ATOM    957  N6   DA A  30      14.530  18.869 -21.270  4.00  0.00           N  
ATOM    958  N7   DA A  30      13.067  17.799 -23.920  7.00  0.00           N  
ATOM    959  C8   DA A  30      12.613  16.734 -24.570  9.00  0.00           C  
ATOM    960  N9   DA A  30      12.414  15.687 -23.810  7.00  0.00           N  
ATOM    961  OP1  DA A  30      12.794  13.096 -30.300  7.00  0.00           O  
ATOM    962  OP2  DA A  30      12.493  15.577 -30.140  8.00  0.00           O1-
ATOM    963  H2   DA A  30      13.335  15.371 -19.490  5.00  0.00           H  
ATOM    964  H8   DA A  30      12.262  16.734 -25.600  4.00  0.00           H  
ATOM    965  H1'  DA A  30      11.678  13.677 -23.440  2.00  0.00           H  
ATOM    966  H2'  DA A  30      10.643  15.463 -25.750  0.00  0.00           H  
ATOM    967  H3'  DA A  30      10.080  13.522 -26.940  0.00  0.00           H  
ATOM    968  H4'  DA A  30      12.050  11.885 -25.620  9.00  0.00           H  
ATOM    969  H5'  DA A  30      13.678  12.813 -27.430  5.00  0.00           H  
ATOM    970  H61  DA A  30      14.791  19.262 -20.340  8.00  0.00           H  
ATOM    971  H62  DA A  30      14.790  19.395 -22.100  2.00  0.00           H  
ATOM    972 H2''  DA A  30       9.733  14.657 -24.460  9.00  0.00           H  
ATOM    973 H5''  DA A  30      12.154  12.117 -28.040  7.00  0.00           H  
ATOM    974  P    DG A  31       9.296  10.998 -25.890  5.00  0.00           P  
ATOM    975  C5'  DG A  31      10.222  10.029 -23.670  5.00  0.00           C  
ATOM    976  O5'  DG A  31       9.071  10.200 -24.530  0.00  0.00           O  
ATOM    977  C4'  DG A  31      10.070   8.838 -22.790  0.00  0.00           C  
ATOM    978  O4'  DG A  31      10.688   9.115 -21.540  7.00  0.00           O  
ATOM    979  C3'  DG A  31       8.662   8.301 -22.500  7.00  0.00           C  
ATOM    980  O3'  DG A  31       8.671   6.947 -22.170  8.00  0.00           O  
ATOM    981  C2'  DG A  31       8.312   9.010 -21.220  7.00  0.00           C  
ATOM    982  C1'  DG A  31       9.723   9.043 -20.530  7.00  0.00           C  
ATOM    983  N1   DG A  31      10.099  14.228 -19.930  0.00  0.00           N  
ATOM    984  C2   DG A  31       9.674  13.540 -21.000  4.00  0.00           C  
ATOM    985  N2   DG A  31       9.344  14.269 -22.040  5.00  0.00           N  
ATOM    986  N3   DG A  31       9.519  12.208 -21.020  5.00  0.00           N  
ATOM    987  C4   DG A  31       9.945  11.580 -19.890  7.00  0.00           C  
ATOM    988  C5   DG A  31      10.393  12.190 -18.720  6.00  0.00           C  
ATOM    989  C6   DG A  31      10.453  13.659 -18.710  2.00  0.00           C  
ATOM    990  O6   DG A  31      10.571  14.417 -17.740  0.00  0.00           O  
ATOM    991  N7   DG A  31      10.706  11.196 -17.740  2.00  0.00           N  
ATOM    992  C8   DG A  31      10.333  10.054 -18.310  3.00  0.00           C  
ATOM    993  N9   DG A  31       9.895  10.205 -19.610  2.00  0.00           N  
ATOM    994  OP1  DG A  31      10.420  10.357 -26.640  6.00  0.00           O  
ATOM    995  OP2  DG A  31       7.994  11.164 -26.590  5.00  0.00           O1-
ATOM    996  H1   DG A  31      10.220  15.244 -19.990  2.00  0.00           H  
ATOM    997  H8   DG A  31      10.399   9.100 -17.920  0.00  0.00           H  
ATOM    998  H1'  DG A  31       9.903   8.206 -19.960  6.00  0.00           H  
ATOM    999  H2'  DG A  31       8.035  10.039 -21.410  1.00  0.00           H  
ATOM   1000  H21  DG A  31       9.182  15.390 -21.950  5.00  0.00           H  
ATOM   1001  H3'  DG A  31       7.936   8.551 -23.290  8.00  0.00           H  
ATOM   1002  H22  DG A  31       9.072  13.818 -22.900  4.00  0.00           H  
ATOM   1003  H4'  DG A  31      10.653   8.051 -23.240  3.00  0.00           H  
ATOM   1004  H5'  DG A  31      10.281  10.911 -23.070  9.00  0.00           H  
ATOM   1005 H2''  DG A  31       7.470   8.502 -20.650  5.00  0.00           H  
ATOM   1006 H5''  DG A  31      11.206   9.999 -24.180  0.00  0.00           H  
ATOM   1007  P    DG A  32       7.432   5.968 -22.440  8.00  0.00           P  
ATOM   1008  C5'  DG A  32       6.919   4.981 -19.890  4.00  0.00           C  
ATOM   1009  O5'  DG A  32       6.546   5.743 -21.070  5.00  0.00           O  
ATOM   1010  C4'  DG A  32       6.329   5.598 -18.620  5.00  0.00           C  
ATOM   1011  O4'  DG A  32       6.888   6.867 -18.200  7.00  0.00           O  
ATOM   1012  C3'  DG A  32       4.799   5.814 -18.850  5.00  0.00           C  
ATOM   1013  O3'  DG A  32       4.064   5.583 -17.660  8.00  0.00           O  
ATOM   1014  C2'  DG A  32       4.802   7.285 -19.130  6.00  0.00           C  
ATOM   1015  C1'  DG A  32       5.803   7.818 -18.120  1.00  0.00           C  
ATOM   1016  N1   DG A  32       8.250  11.804 -15.990  3.00  0.00           N  
ATOM   1017  C2   DG A  32       8.338  10.462 -15.720  6.00  0.00           C  
ATOM   1018  N2   DG A  32       9.048  10.197 -14.650  2.00  0.00           N  
ATOM   1019  N3   DG A  32       7.746   9.445 -16.360  6.00  0.00           N  
ATOM   1020  C4   DG A  32       7.062   9.946 -17.460  9.00  0.00           C  
ATOM   1021  C5   DG A  32       6.896  11.226 -17.890  3.00  0.00           C  
ATOM   1022  C6   DG A  32       7.580  12.250 -17.110  5.00  0.00           C  
ATOM   1023  O6   DG A  32       7.674  13.449 -17.390  7.00  0.00           O  
ATOM   1024  N7   DG A  32       6.124  11.319 -19.040  9.00  0.00           N  
ATOM   1025  C8   DG A  32       5.704  10.097 -19.230  7.00  0.00           C  
ATOM   1026  N9   DG A  32       6.201   9.210 -18.310  5.00  0.00           N  
ATOM   1027  OP1  DG A  32       8.025   4.674 -22.900  3.00  0.00           O  
ATOM   1028  OP2  DG A  32       6.628   6.674 -23.470  3.00  0.00           O1-
ATOM   1029  H1   DG A  32       8.848  12.445 -15.470  5.00  0.00           H  
ATOM   1030  H8   DG A  32       5.075   9.704 -20.110  6.00  0.00           H  
ATOM   1031  H1'  DG A  32       5.429   7.673 -17.050  3.00  0.00           H  
ATOM   1032  H2'  DG A  32       5.026   7.420 -20.170  3.00  0.00           H  
ATOM   1033  H21  DG A  32       9.389  10.961 -13.990  4.00  0.00           H  
ATOM   1034  H3'  DG A  32       4.520   5.340 -19.740  8.00  0.00           H  
ATOM   1035  H22  DG A  32       9.420   9.310 -14.560  4.00  0.00           H  
ATOM   1036  H4'  DG A  32       6.287   4.854 -17.810  7.00  0.00           H  
ATOM   1037  H5'  DG A  32       7.926   5.043 -19.780  2.00  0.00           H  
ATOM   1038 H2''  DG A  32       3.829   7.682 -18.930  3.00  0.00           H  
ATOM   1039 H5''  DG A  32       6.697   3.921 -19.960  2.00  0.00           H  
ATOM   1040  P    DG A  33       3.577   4.145 -17.180  5.00  0.00           P  
ATOM   1041  C5'  DG A  33       4.535   4.128 -14.640  2.00  0.00           C  
ATOM   1042  O5'  DG A  33       3.478   4.432 -15.590  8.00  0.00           O  
ATOM   1043  C4'  DG A  33       5.747   5.031 -14.800  4.00  0.00           C  
ATOM   1044  O4'  DG A  33       5.384   6.418 -14.630  3.00  0.00           O  
ATOM   1045  C3'  DG A  33       6.884   4.767 -13.750  3.00  0.00           C  
ATOM   1046  O3'  DG A  33       6.405   4.703 -12.420  1.00  0.00           O  
ATOM   1047  C2'  DG A  33       7.621   6.072 -14.000  5.00  0.00           C  
ATOM   1048  C1'  DG A  33       6.515   7.146 -14.340  4.00  0.00           C  
ATOM   1049  N1   DG A  33       5.051  11.865 -14.450  6.00  0.00           N  
ATOM   1050  C2   DG A  33       4.543  10.765 -15.180  6.00  0.00           C  
ATOM   1051  N2   DG A  33       4.005  10.926 -16.390  7.00  0.00           N  
ATOM   1052  N3   DG A  33       4.911   9.536 -14.890  2.00  0.00           N  
ATOM   1053  C4   DG A  33       5.729   9.513 -13.770  4.00  0.00           C  
ATOM   1054  C5   DG A  33       6.097  10.462 -12.880  6.00  0.00           C  
ATOM   1055  C6   DG A  33       5.730  11.809 -13.280  3.00  0.00           C  
ATOM   1056  O6   DG A  33       5.857  12.933 -12.640  9.00  0.00           O  
ATOM   1057  N7   DG A  33       6.923   9.849 -11.890  0.00  0.00           N  
ATOM   1058  C8   DG A  33       6.900   8.538 -12.150  1.00  0.00           C  
ATOM   1059  N9   DG A  33       6.324   8.347 -13.410  6.00  0.00           N  
ATOM   1060  OP1  DG A  33       4.543   3.131 -17.560  6.00  0.00           O  
ATOM   1061  OP2  DG A  33       2.201   4.006 -17.620  6.00  0.00           O1-
ATOM   1062  H1   DG A  33       4.871  12.830 -14.750  5.00  0.00           H  
ATOM   1063  H8   DG A  33       7.364   7.798 -11.540  4.00  0.00           H  
ATOM   1064  H1'  DG A  33       6.815   7.603 -15.340  4.00  0.00           H  
ATOM   1065  H2'  DG A  33       8.139   6.420 -13.140  7.00  0.00           H  
ATOM   1066  H21  DG A  33       4.026  11.883 -16.690  4.00  0.00           H  
ATOM   1067  H3'  DG A  33       7.497   3.935 -14.100  2.00  0.00           H  
ATOM   1068  H22  DG A  33       3.681  10.193 -17.030  2.00  0.00           H  
ATOM   1069  H4'  DG A  33       6.065   4.833 -15.790  7.00  0.00           H  
ATOM   1070  H5'  DG A  33       4.814   3.121 -14.780  6.00  0.00           H  
ATOM   1071 H2''  DG A  33       8.310   5.971 -14.860  8.00  0.00           H  
ATOM   1072 H5''  DG A  33       4.139   4.190 -13.660  5.00  0.00           H  
ATOM   1073  P    DT A  34       6.999   3.761 -11.200  3.00  0.00           P  
ATOM   1074  C5'  DT A  34       6.417   5.672  -9.590  9.00  0.00           C  
ATOM   1075  O5'  DT A  34       6.236   4.358  -9.970  7.00  0.00           O  
ATOM   1076  C4'  DT A  34       5.464   6.137  -8.470  2.00  0.00           C  
ATOM   1077  O4'  DT A  34       4.131   5.909  -8.890  6.00  0.00           O  
ATOM   1078  C3'  DT A  34       5.639   5.340  -7.190  1.00  0.00           C  
ATOM   1079  O3'  DT A  34       5.463   6.174  -6.020  3.00  0.00           O  
ATOM   1080  C2'  DT A  34       4.556   4.236  -7.330  5.00  0.00           C  
ATOM   1081  C1'  DT A  34       3.496   5.152  -7.940  6.00  0.00           C  
ATOM   1082  N1   DT A  34       2.468   4.386  -8.520  4.00  0.00           N  
ATOM   1083  C2   DT A  34       1.250   4.238  -7.790  5.00  0.00           C  
ATOM   1084  O2   DT A  34       1.013   4.871  -6.800  7.00  0.00           O  
ATOM   1085  N3   DT A  34       0.300   3.489  -8.340  1.00  0.00           N  
ATOM   1086  C4   DT A  34       0.446   2.828  -9.560  1.00  0.00           C  
ATOM   1087  O4   DT A  34      -0.532   2.115 -10.070  5.00  0.00           O  
ATOM   1088  C5   DT A  34       1.713   3.084 -10.240  3.00  0.00           C  
ATOM   1089  C6   DT A  34       2.666   3.838  -9.800  5.00  0.00           C  
ATOM   1090  C7   DT A  34       1.897   2.422 -11.610  1.00  0.00           C  
ATOM   1091  OP1  DT A  34       8.423   3.934 -11.060  6.00  0.00           O  
ATOM   1092  OP2  DT A  34       6.476   2.385 -11.400  1.00  0.00           O1-
ATOM   1093  H3   DT A  34      -0.604   3.632  -8.040  8.00  0.00           H  
ATOM   1094  H6   DT A  34       3.607   3.808 -10.350  8.00  0.00           H  
ATOM   1095  H1'  DT A  34       3.025   5.851  -7.240  0.00  0.00           H  
ATOM   1096  H2'  DT A  34       4.821   3.469  -8.010  6.00  0.00           H  
ATOM   1097  H3'  DT A  34       6.630   4.874  -7.180  6.00  0.00           H  
ATOM   1098  H4'  DT A  34       5.694   7.244  -8.390  1.00  0.00           H  
ATOM   1099  H5'  DT A  34       6.254   6.331 -10.460  2.00  0.00           H  
ATOM   1100  H71  DT A  34       1.153   2.765 -12.280  5.00  0.00           H  
ATOM   1101  H72  DT A  34       2.856   2.555 -12.140  5.00  0.00           H  
ATOM   1102  H73  DT A  34       1.630   1.396 -11.500  7.00  0.00           H  
ATOM   1103 H2''  DT A  34       4.237   3.897  -6.400  7.00  0.00           H  
ATOM   1104 H5''  DT A  34       7.361   5.992  -9.270  7.00  0.00           H  
ATOM   1105  P    DT A  35       6.109   5.746  -4.710  1.00  0.00           P  
ATOM   1106  C5'  DT A  35       4.094   4.322  -3.560  5.00  0.00           C  
ATOM   1107  O5'  DT A  35       5.416   4.402  -4.170  0.00  0.00           O  
ATOM   1108  C4'  DT A  35       3.692   2.933  -2.990  5.00  0.00           C  
ATOM   1109  O4'  DT A  35       3.630   2.001  -4.120  3.00  0.00           O  
ATOM   1110  C3'  DT A  35       4.583   2.340  -1.880  9.00  0.00           C  
ATOM   1111  O3'  DT A  35       3.732   1.645  -1.020  1.00  0.00           O  
ATOM   1112  C2'  DT A  35       5.541   1.510  -2.730  9.00  0.00           C  
ATOM   1113  C1'  DT A  35       4.570   1.066  -3.850  8.00  0.00           C  
ATOM   1114  N1   DT A  35       5.331   0.725  -5.080  7.00  0.00           N  
ATOM   1115  C2   DT A  35       4.932  -0.477  -5.730  4.00  0.00           C  
ATOM   1116  O2   DT A  35       4.020  -1.186  -5.300  9.00  0.00           O  
ATOM   1117  N3   DT A  35       5.670  -0.899  -6.780  5.00  0.00           N  
ATOM   1118  C4   DT A  35       6.552  -0.123  -7.480  5.00  0.00           C  
ATOM   1119  O4   DT A  35       7.090  -0.629  -8.460  9.00  0.00           O  
ATOM   1120  C5   DT A  35       6.783   1.145  -6.890  9.00  0.00           C  
ATOM   1121  C6   DT A  35       6.255   1.535  -5.650  7.00  0.00           C  
ATOM   1122  C7   DT A  35       7.637   2.107  -7.660  9.00  0.00           C  
ATOM   1123  OP1  DT A  35       5.826   6.829  -3.750  4.00  0.00           O  
ATOM   1124  OP2  DT A  35       7.521   5.274  -4.990  8.00  0.00           O1-
ATOM   1125  H3   DT A  35       5.276  -1.713  -7.220  0.00  0.00           H  
ATOM   1126  H6   DT A  35       6.463   2.434  -5.150  6.00  0.00           H  
ATOM   1127  H1'  DT A  35       4.064   0.191  -3.560  5.00  0.00           H  
ATOM   1128  H2'  DT A  35       6.472   1.947  -3.090  3.00  0.00           H  
ATOM   1129  H3'  DT A  35       5.123   3.134  -1.270  8.00  0.00           H  
ATOM   1130  H4'  DT A  35       2.696   3.055  -2.620  0.00  0.00           H  
ATOM   1131  H5'  DT A  35       3.354   4.691  -4.250  7.00  0.00           H  
ATOM   1132  H71  DT A  35       7.235   2.567  -8.560  7.00  0.00           H  
ATOM   1133  H72  DT A  35       7.818   2.903  -6.990  9.00  0.00           H  
ATOM   1134  H73  DT A  35       8.565   1.573  -7.990  2.00  0.00           H  
ATOM   1135 H2''  DT A  35       5.765   0.628  -2.150  8.00  0.00           H  
ATOM   1136 H5''  DT A  35       4.114   4.961  -2.660  3.00  0.00           H  
ATOM   1137  P    DA A  36       4.219   0.935   0.290  4.00  0.00           P  
ATOM   1138  C5'  DA A  36       4.159  -1.558  -0.640  0.00  0.00           C  
ATOM   1139  O5'  DA A  36       4.907  -0.456  -0.160  2.00  0.00           O  
ATOM   1140  C4'  DA A  36       5.050  -2.747  -1.020  6.00  0.00           C  
ATOM   1141  O4'  DA A  36       5.316  -2.619  -2.410  2.00  0.00           O  
ATOM   1142  C3'  DA A  36       6.457  -2.922  -0.380  3.00  0.00           C  
ATOM   1143  O3'  DA A  36       6.726  -4.167   0.130  2.00  0.00           O  
ATOM   1144  C2'  DA A  36       7.352  -2.697  -1.560  3.00  0.00           C  
ATOM   1145  C1'  DA A  36       6.483  -3.295  -2.660  3.00  0.00           C  
ATOM   1146  N1   DA A  36       7.525  -5.094  -7.350  1.00  0.00           N  
ATOM   1147  C2   DA A  36       6.720  -5.541  -6.370  3.00  0.00           C  
ATOM   1148  N3   DA A  36       6.389  -4.948  -5.220  9.00  0.00           N  
ATOM   1149  C4   DA A  36       7.080  -3.757  -5.140  2.00  0.00           C  
ATOM   1150  C5   DA A  36       7.997  -3.181  -5.990  0.00  0.00           C  
ATOM   1151  C6   DA A  36       8.160  -3.917  -7.180  3.00  0.00           C  
ATOM   1152  N6   DA A  36       8.945  -3.517  -8.210  3.00  0.00           N  
ATOM   1153  N7   DA A  36       8.524  -1.957  -5.470  3.00  0.00           N  
ATOM   1154  C8   DA A  36       7.930  -1.831  -4.310  1.00  0.00           C  
ATOM   1155  N9   DA A  36       7.026  -2.895  -3.990  8.00  0.00           N  
ATOM   1156  OP1  DA A  36       3.056   0.611   1.110  2.00  0.00           O  
ATOM   1157  OP2  DA A  36       5.326   1.784   0.830  0.00  0.00           O1-
ATOM   1158  H2   DA A  36       6.086  -6.446  -6.690  3.00  0.00           H  
ATOM   1159  H8   DA A  36       8.103  -1.029  -3.600  6.00  0.00           H  
ATOM   1160  H1'  DA A  36       6.365  -4.425  -2.510  0.00  0.00           H  
ATOM   1161  H2'  DA A  36       7.588  -1.689  -1.500  0.00  0.00           H  
ATOM   1162  H3'  DA A  36       6.579  -2.075   0.330  3.00  0.00           H  
ATOM   1163  H4'  DA A  36       4.521  -3.746  -0.840  4.00  0.00           H  
ATOM   1164  H5'  DA A  36       3.595  -1.321  -1.510  0.00  0.00           H  
ATOM   1165  H61  DA A  36       9.053  -4.032  -9.090  4.00  0.00           H  
ATOM   1166  H62  DA A  36       9.390  -2.684  -8.180  6.00  0.00           H  
ATOM   1167 H2''  DA A  36       8.297  -3.209  -1.460  2.00  0.00           H  
ATOM   1168 H5''  DA A  36       3.546  -1.941   0.180  9.00  0.00           H  
ATOM   1169  P    DG A  37       7.821  -4.477   1.230  5.00  0.00           P  
ATOM   1170  C5'  DG A  37       9.957  -5.525  -0.000  8.00  0.00           C  
ATOM   1171  O5'  DG A  37       9.274  -4.383   0.550  9.00  0.00           O  
ATOM   1172  C4'  DG A  37       9.099  -6.371  -0.990  5.00  0.00           C  
ATOM   1173  O4'  DG A  37       8.688  -5.691  -2.160  6.00  0.00           O  
ATOM   1174  C3'  DG A  37       9.892  -7.575  -1.460  3.00  0.00           C  
ATOM   1175  O3'  DG A  37       9.820  -8.541  -0.470  0.00  0.00           O  
ATOM   1176  C2'  DG A  37       9.047  -7.952  -2.690  9.00  0.00           C  
ATOM   1177  C1'  DG A  37       8.829  -6.551  -3.330  0.00  0.00           C  
ATOM   1178  N1   DG A  37      10.863  -7.221  -7.940  0.00  0.00           N  
ATOM   1179  C2   DG A  37       9.895  -7.890  -7.270  5.00  0.00           C  
ATOM   1180  N2   DG A  37       9.500  -8.959  -7.800  7.00  0.00           N  
ATOM   1181  N3   DG A  37       9.468  -7.622  -6.000  9.00  0.00           N  
ATOM   1182  C4   DG A  37      10.042  -6.470  -5.520  1.00  0.00           C  
ATOM   1183  C5   DG A  37      11.033  -5.760  -6.050  7.00  0.00           C  
ATOM   1184  C6   DG A  37      11.407  -6.069  -7.420  9.00  0.00           C  
ATOM   1185  O6   DG A  37      12.161  -5.559  -8.200  6.00  0.00           O  
ATOM   1186  N7   DG A  37      11.408  -4.687  -5.240  1.00  0.00           N  
ATOM   1187  C8   DG A  37      10.675  -4.922  -4.170  4.00  0.00           C  
ATOM   1188  N9   DG A  37       9.851  -6.028  -4.250  2.00  0.00           N  
ATOM   1189  OP1  DG A  37       7.619  -5.831   1.820  8.00  0.00           O  
ATOM   1190  OP2  DG A  37       7.732  -3.282   2.140  7.00  0.00           O1-
ATOM   1191  H1   DG A  37      10.984  -7.446  -8.910  1.00  0.00           H  
ATOM   1192  H8   DG A  37      10.708  -4.312  -3.250  8.00  0.00           H  
ATOM   1193  H1'  DG A  37       7.851  -6.509  -3.860  3.00  0.00           H  
ATOM   1194  H2'  DG A  37       9.639  -8.670  -3.280  2.00  0.00           H  
ATOM   1195  H21  DG A  37       9.750  -9.213  -8.770  8.00  0.00           H  
ATOM   1196  H3'  DG A  37      10.985  -7.409  -1.770  4.00  0.00           H  
ATOM   1197  H22  DG A  37       8.719  -9.393  -7.310  7.00  0.00           H  
ATOM   1198  H4'  DG A  37       8.308  -6.780  -0.450  9.00  0.00           H  
ATOM   1199  H5'  DG A  37      10.386  -6.153   0.780  4.00  0.00           H  
ATOM   1200 H2''  DG A  37       8.078  -8.328  -2.460  9.00  0.00           H  
ATOM   1201 H5''  DG A  37      10.760  -5.063  -0.600  7.00  0.00           H  
ATOM   1202  P    DG A  38      11.161  -9.296   0.140  5.00  0.00           P  
ATOM   1203  C5'  DG A  38      10.756 -11.525  -1.260  2.00  0.00           C  
ATOM   1204  O5'  DG A  38      11.619 -10.458  -0.940  1.00  0.00           O  
ATOM   1205  C4'  DG A  38      10.866 -12.083  -2.660  0.00  0.00           C  
ATOM   1206  O4'  DG A  38      10.524 -11.147  -3.660  9.00  0.00           O  
ATOM   1207  C3'  DG A  38      12.240 -12.625  -3.010  8.00  0.00           C  
ATOM   1208  O3'  DG A  38      12.474 -13.892  -2.510  8.00  0.00           O  
ATOM   1209  C2'  DG A  38      12.245 -12.637  -4.530  4.00  0.00           C  
ATOM   1210  C1'  DG A  38      11.364 -11.445  -4.800  0.00  0.00           C  
ATOM   1211  N1   DG A  38      14.078  -9.395  -8.690  6.00  0.00           N  
ATOM   1212  C2   DG A  38      13.198 -10.412  -8.700  1.00  0.00           C  
ATOM   1213  N2   DG A  38      13.179 -11.108  -9.740  8.00  0.00           N  
ATOM   1214  N3   DG A  38      12.531 -10.832  -7.610  9.00  0.00           N  
ATOM   1215  C4   DG A  38      12.676 -10.008  -6.510  9.00  0.00           C  
ATOM   1216  C5   DG A  38      13.433  -8.828  -6.460  0.00  0.00           C  
ATOM   1217  C6   DG A  38      14.189  -8.451  -7.670  2.00  0.00           C  
ATOM   1218  O6   DG A  38      15.016  -7.595  -7.950  4.00  0.00           O  
ATOM   1219  N7   DG A  38      13.370  -8.344  -5.120  9.00  0.00           N  
ATOM   1220  C8   DG A  38      12.679  -9.259  -4.480  4.00  0.00           C  
ATOM   1221  N9   DG A  38      12.158 -10.237  -5.290  2.00  0.00           N  
ATOM   1222  OP1  DG A  38      10.636  -9.975   1.340  5.00  0.00           O  
ATOM   1223  OP2  DG A  38      12.298  -8.378   0.310  0.00  0.00           O1-
ATOM   1224  H1   DG A  38      14.492  -9.150  -9.590  6.00  0.00           H  
ATOM   1225  H8   DG A  38      12.425  -9.252  -3.460  2.00  0.00           H  
ATOM   1226  H1'  DG A  38      10.682 -11.784  -5.530  5.00  0.00           H  
ATOM   1227  H2'  DG A  38      13.244 -12.610  -5.020  0.00  0.00           H  
ATOM   1228  H21  DG A  38      13.771 -10.832 -10.540  8.00  0.00           H  
ATOM   1229  H3'  DG A  38      12.878 -11.908  -2.660  6.00  0.00           H  
ATOM   1230  H22  DG A  38      12.529 -11.794  -9.680  8.00  0.00           H  
ATOM   1231  H4'  DG A  38      10.106 -12.833  -2.800  0.00  0.00           H  
ATOM   1232  H5'  DG A  38       9.762 -11.202  -1.200  0.00  0.00           H  
ATOM   1233 H2''  DG A  38      11.611 -13.562  -4.770  6.00  0.00           H  
ATOM   1234 H5''  DG A  38      10.993 -12.308  -0.590  7.00  0.00           H  
ATOM   1235  P    DG A  39      13.961 -14.583  -2.300  8.00  0.00           P  
ATOM   1236  C5'  DG A  39      13.416 -15.992  -4.530  4.00  0.00           C  
ATOM   1237  O5'  DG A  39      14.226 -15.038  -3.820  1.00  0.00           O  
ATOM   1238  C4'  DG A  39      13.719 -15.989  -6.050  7.00  0.00           C  
ATOM   1239  O4'  DG A  39      13.521 -14.701  -6.640  0.00  0.00           O  
ATOM   1240  C3'  DG A  39      15.082 -16.522  -6.410  4.00  0.00           C  
ATOM   1241  O3'  DG A  39      15.083 -17.933  -6.520  6.00  0.00           O  
ATOM   1242  C2'  DG A  39      15.145 -15.931  -7.790  7.00  0.00           C  
ATOM   1243  C1'  DG A  39      14.501 -14.591  -7.700  1.00  0.00           C  
ATOM   1244  N1   DG A  39      17.851 -11.100  -9.360  4.00  0.00           N  
ATOM   1245  C2   DG A  39      17.164 -11.962 -10.050  5.00  0.00           C  
ATOM   1246  N2   DG A  39      17.489 -12.133 -11.280  7.00  0.00           N  
ATOM   1247  N3   DG A  39      16.146 -12.740  -9.530  2.00  0.00           N  
ATOM   1248  C4   DG A  39      16.112 -12.720  -8.160  7.00  0.00           C  
ATOM   1249  C5   DG A  39      16.740 -11.779  -7.390  3.00  0.00           C  
ATOM   1250  C6   DG A  39      17.679 -10.862  -8.050  6.00  0.00           C  
ATOM   1251  O6   DG A  39      18.317  -9.912  -7.510  4.00  0.00           O  
ATOM   1252  N7   DG A  39      16.410 -11.940  -6.040  0.00  0.00           N  
ATOM   1253  C8   DG A  39      15.645 -12.981  -6.030  8.00  0.00           C  
ATOM   1254  N9   DG A  39      15.406 -13.513  -7.310  2.00  0.00           N  
ATOM   1255  OP1  DG A  39      13.797 -15.744  -1.450  2.00  0.00           O  
ATOM   1256  OP2  DG A  39      14.998 -13.630  -1.920  1.00  0.00           O1-
ATOM   1257  H1   DG A  39      18.494 -10.590  -9.890  6.00  0.00           H  
ATOM   1258  H8   DG A  39      15.086 -13.331  -5.190  2.00  0.00           H  
ATOM   1259  H1'  DG A  39      13.904 -14.343  -8.630  6.00  0.00           H  
ATOM   1260  H2'  DG A  39      16.171 -15.692  -8.170  9.00  0.00           H  
ATOM   1261  H21  DG A  39      18.273 -11.590 -11.700  0.00  0.00           H  
ATOM   1262  H3'  DG A  39      15.819 -16.032  -5.780  3.00  0.00           H  
ATOM   1263  H22  DG A  39      17.070 -12.918 -11.780  7.00  0.00           H  
ATOM   1264  H4'  DG A  39      13.003 -16.613  -6.530  6.00  0.00           H  
ATOM   1265  H5'  DG A  39      12.365 -15.705  -4.460  0.00  0.00           H  
ATOM   1266 H2''  DG A  39      14.671 -16.527  -8.560  0.00  0.00           H  
ATOM   1267 H5''  DG A  39      13.471 -17.056  -4.210  9.00  0.00           H  
ATOM   1268  P    DT A  40      16.389 -18.818  -6.410  5.00  0.00           P  
ATOM   1269  C5'  DT A  40      16.918 -18.710  -9.050  8.00  0.00           C  
ATOM   1270  O5'  DT A  40      17.233 -18.362  -7.700  8.00  0.00           O  
ATOM   1271  C4'  DT A  40      17.835 -18.076 -10.100  0.00  0.00           C  
ATOM   1272  O4'  DT A  40      17.606 -16.660 -10.180  6.00  0.00           O  
ATOM   1273  C3'  DT A  40      19.384 -18.274  -9.920  3.00  0.00           C  
ATOM   1274  O3'  DT A  40      19.823 -19.504 -10.480  9.00  0.00           O  
ATOM   1275  C2'  DT A  40      19.837 -17.103 -10.740  9.00  0.00           C  
ATOM   1276  C1'  DT A  40      18.791 -16.006 -10.590  3.00  0.00           C  
ATOM   1277  N1   DT A  40      19.297 -15.078  -9.580  7.00  0.00           N  
ATOM   1278  C2   DT A  40      20.141 -14.066  -9.990  2.00  0.00           C  
ATOM   1279  O2   DT A  40      20.382 -13.856 -11.140  8.00  0.00           O  
ATOM   1280  N3   DT A  40      20.611 -13.255  -8.970  6.00  0.00           N  
ATOM   1281  C4   DT A  40      20.183 -13.198  -7.680  3.00  0.00           C  
ATOM   1282  O4   DT A  40      20.382 -12.198  -6.950  7.00  0.00           O  
ATOM   1283  C5   DT A  40      19.354 -14.302  -7.300  9.00  0.00           C  
ATOM   1284  C6   DT A  40      18.984 -15.217  -8.250  7.00  0.00           C  
ATOM   1285  C7   DT A  40      18.858 -14.487  -5.880  2.00  0.00           C  
ATOM   1286  OP1  DT A  40      16.036 -20.251  -6.520  7.00  0.00           O  
ATOM   1287  OP2  DT A  40      17.144 -18.349  -5.210  5.00  0.00           O1-
ATOM   1288  H3   DT A  40      21.211 -12.533  -9.330  9.00  0.00           H  
ATOM   1289  H6   DT A  40      18.413 -16.112  -7.990  8.00  0.00           H  
ATOM   1290  H1'  DT A  40      18.711 -15.434 -11.510  7.00  0.00           H  
ATOM   1291  H2'  DT A  40      20.767 -16.709 -10.470  6.00  0.00           H  
ATOM   1292  H3'  DT A  40      19.572 -18.218  -8.770  9.00  0.00           H  
ATOM   1293  H4'  DT A  40      17.512 -18.507 -11.050  8.00  0.00           H  
ATOM   1294  H5'  DT A  40      15.943 -18.343  -9.330  4.00  0.00           H  
ATOM   1295  H71  DT A  40      19.722 -14.634  -5.220  7.00  0.00           H  
ATOM   1296  H72  DT A  40      18.366 -13.531  -5.540  6.00  0.00           H  
ATOM   1297  H73  DT A  40      18.183 -15.325  -5.840  3.00  0.00           H  
ATOM   1298 H2''  DT A  40      19.745 -17.392 -11.800  0.00  0.00           H  
ATOM   1299 H5''  DT A  40      17.084 -19.796  -9.020  0.00  0.00           H  
ATOM   1300  P    DT A  41      21.194 -20.157 -10.130  8.00  0.00           P  
ATOM   1301  C5'  DT A  41      22.274 -19.010 -12.360  6.00  0.00           C  
ATOM   1302  O5'  DT A  41      22.262 -19.213 -10.890  1.00  0.00           O  
ATOM   1303  C4'  DT A  41      23.504 -18.138 -12.720  0.00  0.00           C  
ATOM   1304  O4'  DT A  41      23.501 -16.878 -12.070  7.00  0.00           O  
ATOM   1305  C3'  DT A  41      24.853 -18.839 -12.480  7.00  0.00           C  
ATOM   1306  O3'  DT A  41      25.691 -18.497 -13.610  1.00  0.00           O  
ATOM   1307  C2'  DT A  41      25.262 -18.093 -11.170  0.00  0.00           C  
ATOM   1308  C1'  DT A  41      24.702 -16.708 -11.340  1.00  0.00           C  
ATOM   1309  N1   DT A  41      24.422 -16.004 -10.070  6.00  0.00           N  
ATOM   1310  C2   DT A  41      24.882 -14.678  -9.930  2.00  0.00           C  
ATOM   1311  O2   DT A  41      25.389 -14.040 -10.790  1.00  0.00           O  
ATOM   1312  N3   DT A  41      24.487 -14.003  -8.800  5.00  0.00           N  
ATOM   1313  C4   DT A  41      23.873 -14.599  -7.700  1.00  0.00           C  
ATOM   1314  O4   DT A  41      23.729 -13.888  -6.650  4.00  0.00           O  
ATOM   1315  C5   DT A  41      23.330 -15.902  -7.940  6.00  0.00           C  
ATOM   1316  C6   DT A  41      23.635 -16.604  -9.060  2.00  0.00           C  
ATOM   1317  C7   DT A  41      22.479 -16.631  -6.940  2.00  0.00           C  
ATOM   1318  OP1  DT A  41      21.255 -21.466 -10.790  4.00  0.00           O  
ATOM   1319  OP2  DT A  41      21.322 -20.072  -8.640  9.00  0.00           O1-
ATOM   1320  H3   DT A  41      25.029 -13.118  -8.600  0.00  0.00           H  
ATOM   1321  H6   DT A  41      23.121 -17.595  -9.340  3.00  0.00           H  
ATOM   1322  H1'  DT A  41      25.388 -16.150 -11.940  2.00  0.00           H  
ATOM   1323  H2'  DT A  41      24.933 -18.686 -10.310  2.00  0.00           H  
ATOM   1324  H3'  DT A  41      24.760 -19.870 -12.340  5.00  0.00           H  
ATOM   1325  H4'  DT A  41      23.433 -17.957 -13.750  4.00  0.00           H  
ATOM   1326  H5'  DT A  41      21.406 -18.469 -12.790  6.00  0.00           H  
ATOM   1327  H71  DT A  41      22.921 -16.669  -5.930  8.00  0.00           H  
ATOM   1328  H72  DT A  41      21.563 -16.048  -6.790  8.00  0.00           H  
ATOM   1329  H73  DT A  41      22.162 -17.671  -7.120  8.00  0.00           H  
ATOM   1330 H2''  DT A  41      26.285 -17.847 -11.130  6.00  0.00           H  
ATOM   1331 H5''  DT A  41      22.381 -19.945 -12.810  8.00  0.00           H  
ATOM   1332  P    DA A  42      27.152 -18.997 -13.790  9.00  0.00           P  
ATOM   1333  C5'  DA A  42      28.544 -16.710 -13.470  1.00  0.00           C  
ATOM   1334  O5'  DA A  42      28.131 -17.996 -12.990  9.00  0.00           O  
ATOM   1335  C4'  DA A  42      29.614 -16.016 -12.560  6.00  0.00           C  
ATOM   1336  O4'  DA A  42      28.954 -15.262 -11.520  4.00  0.00           O  
ATOM   1337  C3'  DA A  42      30.642 -16.993 -11.930  4.00  0.00           C  
ATOM   1338  O3'  DA A  42      31.986 -16.539 -12.000  4.00  0.00           O  
ATOM   1339  C2'  DA A  42      29.987 -16.995 -10.530  6.00  0.00           C  
ATOM   1340  C1'  DA A  42      29.647 -15.515 -10.300  6.00  0.00           C  
ATOM   1341  N1   DA A  42      28.546 -12.828  -5.930  0.00  0.00           N  
ATOM   1342  C2   DA A  42      29.501 -12.666  -6.820  8.00  0.00           C  
ATOM   1343  N3   DA A  42      29.672 -13.313  -8.020  9.00  0.00           N  
ATOM   1344  C4   DA A  42      28.826 -14.418  -8.090  7.00  0.00           C  
ATOM   1345  C5   DA A  42      27.794 -14.731  -7.240  7.00  0.00           C  
ATOM   1346  C6   DA A  42      27.648 -13.798  -6.140  3.00  0.00           C  
ATOM   1347  N6   DA A  42      26.594 -13.745  -5.320  7.00  0.00           N  
ATOM   1348  N7   DA A  42      27.000 -15.799  -7.700  1.00  0.00           N  
ATOM   1349  C8   DA A  42      27.593 -16.099  -8.810  0.00  0.00           C  
ATOM   1350  N9   DA A  42      28.710 -15.319  -9.120  3.00  0.00           N  
ATOM   1351  OP1  DA A  42      27.537 -18.740 -15.170  5.00  0.00           O  
ATOM   1352  OP2  DA A  42      27.181 -20.353 -13.290  9.00  0.00           O1-
ATOM   1353  H2   DA A  42      30.151 -11.860  -6.610  0.00  0.00           H  
ATOM   1354  H8   DA A  42      27.291 -16.928  -9.450  0.00  0.00           H  
ATOM   1355  H1'  DA A  42      30.526 -15.040 -10.150  1.00  0.00           H  
ATOM   1356  H2'  DA A  42      29.092 -17.630 -10.580  6.00  0.00           H  
ATOM   1357  H3'  DA A  42      30.486 -17.971 -12.300  0.00  0.00           H  
ATOM   1358  H4'  DA A  42      30.194 -15.221 -13.160  1.00  0.00           H  
ATOM   1359  H5'  DA A  42      27.700 -16.081 -13.660  8.00  0.00           H  
ATOM   1360  H61  DA A  42      26.492 -13.041  -4.640  4.00  0.00           H  
ATOM   1361  H62  DA A  42      25.930 -14.507  -5.350  9.00  0.00           H  
ATOM   1362 H2''  DA A  42      30.611 -17.373  -9.730  2.00  0.00           H  
ATOM   1363 H5''  DA A  42      29.059 -16.927 -14.380  0.00  0.00           H  
ATOM   1364  P    DG A  43      33.197 -17.299 -11.270  4.00  0.00           P  
ATOM   1365  C5'  DG A  43      34.394 -15.292 -10.040  6.00  0.00           C  
ATOM   1366  O5'  DG A  43      33.553 -16.397 -10.030  5.00  0.00           O  
ATOM   1367  C4'  DG A  43      34.446 -14.935  -8.570  8.00  0.00           C  
ATOM   1368  O4'  DG A  43      33.234 -14.602  -7.930  7.00  0.00           O  
ATOM   1369  C3'  DG A  43      35.070 -16.013  -7.760  7.00  0.00           C  
ATOM   1370  O3'  DG A  43      36.090 -15.467  -6.970  3.00  0.00           O  
ATOM   1371  C2'  DG A  43      33.916 -16.491  -6.830  3.00  0.00           C  
ATOM   1372  C1'  DG A  43      33.175 -15.224  -6.640  1.00  0.00           C  
ATOM   1373  N1   DG A  43      30.002 -13.348  -2.940  6.00  0.00           N  
ATOM   1374  C2   DG A  43      31.117 -12.745  -3.450  2.00  0.00           C  
ATOM   1375  N2   DG A  43      31.658 -11.887  -2.660  6.00  0.00           N  
ATOM   1376  N3   DG A  43      31.894 -13.279  -4.440  1.00  0.00           N  
ATOM   1377  C4   DG A  43      31.354 -14.473  -4.960  6.00  0.00           C  
ATOM   1378  C5   DG A  43      30.181 -15.096  -4.520  8.00  0.00           C  
ATOM   1379  C6   DG A  43      29.477 -14.532  -3.390  3.00  0.00           C  
ATOM   1380  O6   DG A  43      28.501 -14.989  -2.790  7.00  0.00           O  
ATOM   1381  N7   DG A  43      29.956 -16.299  -5.150  8.00  0.00           N  
ATOM   1382  C8   DG A  43      31.051 -16.400  -5.900  5.00  0.00           C  
ATOM   1383  N9   DG A  43      31.895 -15.345  -5.890  9.00  0.00           N  
ATOM   1384  OP1  DG A  43      34.320 -17.192 -12.250  9.00  0.00           O  
ATOM   1385  OP2  DG A  43      32.718 -18.647 -10.850  1.00  0.00           O1-
ATOM   1386  H1   DG A  43      29.571 -12.923  -2.160  0.00  0.00           H  
ATOM   1387  H8   DG A  43      31.168 -17.352  -6.470  4.00  0.00           H  
ATOM   1388  H1'  DG A  43      33.828 -14.626  -5.970  1.00  0.00           H  
ATOM   1389  H2'  DG A  43      33.236 -17.256  -7.250  8.00  0.00           H  
ATOM   1390  H21  DG A  43      31.276 -11.620  -1.830  6.00  0.00           H  
ATOM   1391  H3'  DG A  43      35.510 -16.672  -8.390  1.00  0.00           H  
ATOM   1392  H22  DG A  43      32.453 -11.412  -3.070  1.00  0.00           H  
ATOM   1393  H4'  DG A  43      35.009 -14.026  -8.500  5.00  0.00           H  
ATOM   1394  H5'  DG A  43      34.014 -14.507 -10.690  4.00  0.00           H  
ATOM   1395 H2''  DG A  43      34.343 -16.875  -5.810  7.00  0.00           H  
ATOM   1396 H5''  DG A  43      35.365 -15.603 -10.410  7.00  0.00           H  
ATOM   1397  P    DG A  44      37.295 -16.359  -6.380  4.00  0.00           P  
ATOM   1398  C5'  DG A  44      36.919 -16.372  -3.780  4.00  0.00           C  
ATOM   1399  O5'  DG A  44      36.687 -17.004  -5.000  6.00  0.00           O  
ATOM   1400  C4'  DG A  44      36.258 -15.017  -3.490  3.00  0.00           C  
ATOM   1401  O4'  DG A  44      34.837 -15.118  -3.750  2.00  0.00           O  
ATOM   1402  C3'  DG A  44      36.439 -14.595  -2.000  4.00  0.00           C  
ATOM   1403  O3'  DG A  44      36.313 -13.198  -2.070  5.00  0.00           O  
ATOM   1404  C2'  DG A  44      35.200 -15.154  -1.320  7.00  0.00           C  
ATOM   1405  C1'  DG A  44      34.152 -14.971  -2.490  2.00  0.00           C  
ATOM   1406  N1   DG A  44      29.897 -16.046   0.150  4.00  0.00           N  
ATOM   1407  C2   DG A  44      30.777 -15.055   0.370  4.00  0.00           C  
ATOM   1408  N2   DG A  44      30.466 -14.131   1.270  5.00  0.00           N  
ATOM   1409  N3   DG A  44      31.737 -14.758  -0.460  6.00  0.00           N  
ATOM   1410  C4   DG A  44      31.917 -15.710  -1.480  0.00  0.00           C  
ATOM   1411  C5   DG A  44      31.196 -16.861  -1.670  3.00  0.00           C  
ATOM   1412  C6   DG A  44      30.112 -17.057  -0.750  9.00  0.00           C  
ATOM   1413  O6   DG A  44      29.343 -17.979  -0.700  6.00  0.00           O  
ATOM   1414  N7   DG A  44      31.719 -17.579  -2.800  9.00  0.00           N  
ATOM   1415  C8   DG A  44      32.735 -16.853  -3.140  4.00  0.00           C  
ATOM   1416  N9   DG A  44      32.956 -15.748  -2.430  4.00  0.00           N  
ATOM   1417  OP1  DG A  44      38.240 -15.316  -6.050  3.00  0.00           O  
ATOM   1418  OP2  DG A  44      37.649 -17.411  -7.370  2.00  0.00           O1-
ATOM   1419  H1   DG A  44      29.150 -16.120   0.790  8.00  0.00           H  
ATOM   1420  H8   DG A  44      33.437 -17.160  -3.920  2.00  0.00           H  
ATOM   1421  H1'  DG A  44      33.859 -13.933  -2.380  3.00  0.00           H  
ATOM   1422  H2'  DG A  44      35.447 -16.227  -1.140  5.00  0.00           H  
ATOM   1423  H21  DG A  44      29.829 -14.360   2.050  0.00  0.00           H  
ATOM   1424  H3'  DG A  44      37.379 -14.921  -1.640  1.00  0.00           H  
ATOM   1425  H22  DG A  44      30.958 -13.213   1.300  6.00  0.00           H  
ATOM   1426  H4'  DG A  44      36.683 -14.283  -4.190  5.00  0.00           H  
ATOM   1427  H5'  DG A  44      38.035 -16.531  -3.530  4.00  0.00           H  
ATOM   1428 H2''  DG A  44      34.899 -14.605  -0.420  1.00  0.00           H  
ATOM   1429 H5''  DG A  44      36.472 -17.061  -3.090  5.00  0.00           H  
ATOM   1430  P   DG3 A  45      37.130 -12.331  -0.970  5.00  0.00           P  
ATOM   1431  C5' DG3 A  45      35.669 -11.763   1.230  3.00  0.00           C  
ATOM   1432  O5' DG3 A  45      36.287 -12.747   0.400  3.00  0.00           O  
ATOM   1433  C4' DG3 A  45      35.131 -12.364   2.540  1.00  0.00           C  
ATOM   1434  O4' DG3 A  45      34.026 -13.291   2.410  9.00  0.00           O  
ATOM   1435  C3' DG3 A  45      36.134 -13.089   3.410  7.00  0.00           C  
ATOM   1436  O3' DG3 A  45      36.010 -12.584   4.790  6.00  0.00           O  
ATOM   1437  C2' DG3 A  45      35.712 -14.551   3.340  5.00  0.00           C  
ATOM   1438  C1' DG3 A  45      34.214 -14.384   3.360  0.00  0.00           C  
ATOM   1439  N1  DG3 A  45      30.569 -17.864   4.580  3.00  0.00           N  
ATOM   1440  C2  DG3 A  45      30.756 -16.615   5.060  3.00  0.00           C  
ATOM   1441  N2  DG3 A  45      30.020 -16.188   6.090  1.00  0.00           N  
ATOM   1442  N3  DG3 A  45      31.797 -15.846   4.710  2.00  0.00           N  
ATOM   1443  C4  DG3 A  45      32.469 -16.190   3.550  5.00  0.00           C  
ATOM   1444  C5  DG3 A  45      32.139 -17.372   2.910  0.00  0.00           C  
ATOM   1445  C6  DG3 A  45      31.095 -18.232   3.390  6.00  0.00           C  
ATOM   1446  O6  DG3 A  45      30.595 -19.274   2.970  3.00  0.00           O  
ATOM   1447  N7  DG3 A  45      32.961 -17.499   1.780  2.00  0.00           N  
ATOM   1448  C8  DG3 A  45      33.730 -16.461   1.790  5.00  0.00           C  
ATOM   1449  N9  DG3 A  45      33.582 -15.694   2.970  5.00  0.00           N  
ATOM   1450  OP1 DG3 A  45      36.895 -10.918  -1.250  8.00  0.00           O  
ATOM   1451  OP2 DG3 A  45      38.522 -12.831  -0.800  3.00  0.00           O  
ATOM   1452 HO3' DG3 A  45      36.988 -12.517   5.080  3.00  0.00           H  
ATOM   1453  H1  DG3 A  45      29.783 -18.371   4.890  1.00  0.00           H  
ATOM   1454  H8  DG3 A  45      34.403 -16.287   0.940  6.00  0.00           H  
ATOM   1455  H1' DG3 A  45      33.811 -14.037   4.300  3.00  0.00           H  
ATOM   1456  H2' DG3 A  45      36.137 -14.947   2.370  9.00  0.00           H  
ATOM   1457  H21 DG3 A  45      29.210 -16.737   6.300  0.00  0.00           H  
ATOM   1458  H3' DG3 A  45      37.083 -12.910   3.010  1.00  0.00           H  
ATOM   1459  H22 DG3 A  45      30.339 -15.518   6.710  6.00  0.00           H  
ATOM   1460  H4' DG3 A  45      34.831 -11.513   3.140  4.00  0.00           H  
ATOM   1461  H5' DG3 A  45      34.918 -11.258   0.680  7.00  0.00           H  
ATOM   1462 H2'' DG3 A  45      36.099 -15.156   4.190  0.00  0.00           H  
ATOM   1463 H5'' DG3 A  45      36.402 -10.945   1.430  5.00  0.00           H  
ATOM   1464  C5' DC5 A  46      21.740 -19.713   8.290  7.00  0.00           C  
ATOM   1465  O5' DC5 A  46      21.735 -20.109   6.920  1.00  0.00           O  
ATOM   1466  C4' DC5 A  46      22.955 -18.765   8.520  2.00  0.00           C  
ATOM   1467  O4' DC5 A  46      24.282 -19.290   8.110  1.00  0.00           O  
ATOM   1468  C3' DC5 A  46      22.903 -17.431   7.810  5.00  0.00           C  
ATOM   1469  O3' DC5 A  46      23.106 -16.416   8.720  7.00  0.00           O  
ATOM   1470  C2' DC5 A  46      24.000 -17.340   6.780  7.00  0.00           C  
ATOM   1471  C1' DC5 A  46      25.028 -18.318   7.350  5.00  0.00           C  
ATOM   1472  N1  DC5 A  46      25.791 -18.975   6.230  0.00  0.00           N  
ATOM   1473  C2  DC5 A  46      27.174 -18.647   6.070  8.00  0.00           C  
ATOM   1474  O2  DC5 A  46      27.664 -17.776   6.880  0.00  0.00           O  
ATOM   1475  N3  DC5 A  46      27.959 -19.165   5.040  7.00  0.00           N  
ATOM   1476  C4  DC5 A  46      27.365 -20.067   4.280  0.00  0.00           C  
ATOM   1477  N4  DC5 A  46      28.128 -20.654   3.380  7.00  0.00           N  
ATOM   1478  C5  DC5 A  46      25.990 -20.524   4.440  2.00  0.00           C  
ATOM   1479  C6  DC5 A  46      25.225 -19.943   5.430  1.00  0.00           C  
ATOM   1480 HO5' DC5 A  46      21.745 -19.376   6.290  2.00  0.00           H  
ATOM   1481  H5  DC5 A  46      25.585 -21.264   3.720  6.00  0.00           H  
ATOM   1482  H6  DC5 A  46      24.194 -20.155   5.570  6.00  0.00           H  
ATOM   1483  H1' DC5 A  46      25.733 -17.792   8.050  4.00  0.00           H  
ATOM   1484  H2' DC5 A  46      23.621 -17.745   5.850  1.00  0.00           H  
ATOM   1485  H3' DC5 A  46      21.982 -17.292   7.240  7.00  0.00           H  
ATOM   1486  H4' DC5 A  46      22.923 -18.530   9.580  9.00  0.00           H  
ATOM   1487  H41 DC5 A  46      29.029 -20.213   3.180  0.00  0.00           H  
ATOM   1488  H5' DC5 A  46      21.924 -20.587   8.870  8.00  0.00           H  
ATOM   1489  H42 DC5 A  46      27.758 -21.260   2.780  5.00  0.00           H  
ATOM   1490 H2'' DC5 A  46      24.402 -16.390   6.600  3.00  0.00           H  
ATOM   1491 H5'' DC5 A  46      20.768 -19.270   8.550  3.00  0.00           H  
ATOM   1492  P    DC A  47      22.653 -14.927   8.530  6.00  0.00           P  
ATOM   1493  C5'  DC A  47      25.017 -13.903   8.150  0.00  0.00           C  
ATOM   1494  O5'  DC A  47      23.724 -14.180   7.610  2.00  0.00           O  
ATOM   1495  C4'  DC A  47      26.117 -13.542   7.130  0.00  0.00           C  
ATOM   1496  O4'  DC A  47      26.555 -14.692   6.310  1.00  0.00           O  
ATOM   1497  C3'  DC A  47      25.586 -12.568   6.080  9.00  0.00           C  
ATOM   1498  O3'  DC A  47      26.560 -11.670   5.750  8.00  0.00           O  
ATOM   1499  C2'  DC A  47      25.401 -13.414   4.830  6.00  0.00           C  
ATOM   1500  C1'  DC A  47      26.610 -14.354   4.970  4.00  0.00           C  
ATOM   1501  N1   DC A  47      26.704 -15.516   4.010  4.00  0.00           N  
ATOM   1502  C2   DC A  47      27.923 -15.770   3.300  5.00  0.00           C  
ATOM   1503  O2   DC A  47      28.795 -14.925   3.400  4.00  0.00           O  
ATOM   1504  N3   DC A  47      28.060 -16.798   2.440  6.00  0.00           N  
ATOM   1505  C4   DC A  47      27.019 -17.562   2.180  9.00  0.00           C  
ATOM   1506  N4   DC A  47      27.052 -18.483   1.200  6.00  0.00           N  
ATOM   1507  C5   DC A  47      25.827 -17.435   2.980  2.00  0.00           C  
ATOM   1508  C6   DC A  47      25.704 -16.407   3.900  2.00  0.00           C  
ATOM   1509  OP1  DC A  47      22.615 -14.338   9.880  2.00  0.00           O  
ATOM   1510  OP2  DC A  47      21.336 -14.923   7.850  7.00  0.00           O1-
ATOM   1511  H5   DC A  47      24.965 -18.148   2.880  8.00  0.00           H  
ATOM   1512  H6   DC A  47      24.848 -16.168   4.450  2.00  0.00           H  
ATOM   1513  H1'  DC A  47      27.382 -13.684   4.780  9.00  0.00           H  
ATOM   1514  H2'  DC A  47      24.489 -13.947   4.860  4.00  0.00           H  
ATOM   1515  H3'  DC A  47      24.623 -12.120   6.410  3.00  0.00           H  
ATOM   1516  H4'  DC A  47      26.946 -13.048   7.690  8.00  0.00           H  
ATOM   1517  H41  DC A  47      26.221 -18.928   0.950  4.00  0.00           H  
ATOM   1518  H5'  DC A  47      25.351 -14.718   8.740  9.00  0.00           H  
ATOM   1519  H42  DC A  47      27.928 -18.712   0.760  8.00  0.00           H  
ATOM   1520 H2''  DC A  47      25.510 -12.840   3.880  6.00  0.00           H  
ATOM   1521 H5''  DC A  47      24.951 -13.025   8.750  0.00  0.00           H  
ATOM   1522  P    DC A  48      26.112 -10.131   5.510  8.00  0.00           P  
ATOM   1523  C5'  DC A  48      28.554  -9.039   4.970  7.00  0.00           C  
ATOM   1524  O5'  DC A  48      27.260  -9.478   4.530  6.00  0.00           O  
ATOM   1525  C4'  DC A  48      29.348  -8.583   3.760  6.00  0.00           C  
ATOM   1526  O4'  DC A  48      29.651  -9.724   2.930  6.00  0.00           O  
ATOM   1527  C3'  DC A  48      28.612  -7.535   2.870  5.00  0.00           C  
ATOM   1528  O3'  DC A  48      29.663  -6.732   2.420  7.00  0.00           O  
ATOM   1529  C2'  DC A  48      28.012  -8.465   1.830  8.00  0.00           C  
ATOM   1530  C1'  DC A  48      29.052  -9.556   1.690  1.00  0.00           C  
ATOM   1531  N1   DC A  48      28.578 -10.857   1.100  6.00  0.00           N  
ATOM   1532  C2   DC A  48      29.060 -11.375  -0.080  3.00  0.00           C  
ATOM   1533  O2   DC A  48      29.943 -10.843  -0.690  6.00  0.00           O  
ATOM   1534  N3   DC A  48      28.625 -12.502  -0.640  3.00  0.00           N  
ATOM   1535  C4   DC A  48      27.682 -13.167   0.000  1.00  0.00           C  
ATOM   1536  N4   DC A  48      27.097 -14.083  -0.750  6.00  0.00           N  
ATOM   1537  C5   DC A  48      27.218 -12.790   1.250  5.00  0.00           C  
ATOM   1538  C6   DC A  48      27.669 -11.654   1.820  7.00  0.00           C  
ATOM   1539  OP1  DC A  48      26.103  -9.350   6.740  5.00  0.00           O  
ATOM   1540  OP2  DC A  48      24.946 -10.149   4.610  3.00  0.00           O1-
ATOM   1541  H5   DC A  48      26.483 -13.305   1.800  1.00  0.00           H  
ATOM   1542  H6   DC A  48      27.376 -11.291   2.860  6.00  0.00           H  
ATOM   1543  H1'  DC A  48      29.841  -9.096   1.040  0.00  0.00           H  
ATOM   1544  H2'  DC A  48      27.100  -8.880   2.260  7.00  0.00           H  
ATOM   1545  H3'  DC A  48      27.845  -6.946   3.400  7.00  0.00           H  
ATOM   1546  H4'  DC A  48      30.296  -8.128   4.070  7.00  0.00           H  
ATOM   1547  H41  DC A  48      27.570 -14.270  -1.570  4.00  0.00           H  
ATOM   1548  H5'  DC A  48      29.098  -9.960   5.320  2.00  0.00           H  
ATOM   1549  H42  DC A  48      26.327 -14.595  -0.280  4.00  0.00           H  
ATOM   1550 H2''  DC A  48      27.834  -7.941   0.860  8.00  0.00           H  
ATOM   1551 H5''  DC A  48      28.600  -8.345   5.730  6.00  0.00           H  
ATOM   1552  P    DT A  49      29.613  -5.427   1.560  6.00  0.00           P  
ATOM   1553  C5'  DT A  49      31.251  -6.072  -0.350  4.00  0.00           C  
ATOM   1554  O5'  DT A  49      29.926  -5.983   0.100  3.00  0.00           O  
ATOM   1555  C4'  DT A  49      31.405  -6.494  -1.760  2.00  0.00           C  
ATOM   1556  O4'  DT A  49      30.892  -7.743  -1.840  8.00  0.00           O  
ATOM   1557  C3'  DT A  49      30.719  -5.575  -2.840  5.00  0.00           C  
ATOM   1558  O3'  DT A  49      31.638  -5.384  -3.940  5.00  0.00           O  
ATOM   1559  C2'  DT A  49      29.504  -6.419  -3.210  6.00  0.00           C  
ATOM   1560  C1'  DT A  49      30.157  -7.724  -3.100  7.00  0.00           C  
ATOM   1561  N1   DT A  49      29.184  -8.807  -2.970  4.00  0.00           N  
ATOM   1562  C2   DT A  49      29.267  -9.774  -3.980  7.00  0.00           C  
ATOM   1563  O2   DT A  49      30.124  -9.895  -4.870  8.00  0.00           O  
ATOM   1564  N3   DT A  49      28.214 -10.722  -3.980  4.00  0.00           N  
ATOM   1565  C4   DT A  49      27.185 -10.831  -3.070  1.00  0.00           C  
ATOM   1566  O4   DT A  49      26.308 -11.663  -3.190  7.00  0.00           O  
ATOM   1567  C5   DT A  49      27.141  -9.770  -2.110  4.00  0.00           C  
ATOM   1568  C6   DT A  49      28.126  -8.843  -2.020  0.00  0.00           C  
ATOM   1569  C7   DT A  49      25.991  -9.671  -1.070  3.00  0.00           C  
ATOM   1570  OP1  DT A  49      30.711  -4.490   2.050  0.00  0.00           O  
ATOM   1571  OP2  DT A  49      28.199  -4.871   1.590  8.00  0.00           O1-
ATOM   1572  H3   DT A  49      28.342 -11.474  -4.570  0.00  0.00           H  
ATOM   1573  H6   DT A  49      28.158  -8.051  -1.230  2.00  0.00           H  
ATOM   1574  H1'  DT A  49      30.842  -7.974  -3.900  6.00  0.00           H  
ATOM   1575  H2'  DT A  49      28.713  -6.320  -2.420  8.00  0.00           H  
ATOM   1576  H3'  DT A  49      30.387  -4.654  -2.290  0.00  0.00           H  
ATOM   1577  H4'  DT A  49      32.444  -6.539  -2.020  0.00  0.00           H  
ATOM   1578  H5'  DT A  49      31.897  -6.667   0.320  5.00  0.00           H  
ATOM   1579  H71  DT A  49      26.294  -9.112  -0.160  4.00  0.00           H  
ATOM   1580  H72  DT A  49      25.067  -9.275  -1.470  1.00  0.00           H  
ATOM   1581  H73  DT A  49      25.769 -10.656  -0.640  8.00  0.00           H  
ATOM   1582 H2''  DT A  49      29.188  -6.342  -4.220  3.00  0.00           H  
ATOM   1583 H5''  DT A  49      31.712  -5.042  -0.280  3.00  0.00           H  
ATOM   1584  P    DA A  50      31.392  -4.450  -5.140  5.00  0.00           P  
ATOM   1585  C5'  DA A  50      32.028  -5.804  -7.200  1.00  0.00           C  
ATOM   1586  O5'  DA A  50      30.947  -5.354  -6.370  1.00  0.00           O  
ATOM   1587  C4'  DA A  50      31.480  -6.682  -8.350  5.00  0.00           C  
ATOM   1588  O4'  DA A  50      30.701  -7.804  -7.960  4.00  0.00           O  
ATOM   1589  C3'  DA A  50      30.576  -5.870  -9.350  2.00  0.00           C  
ATOM   1590  O3'  DA A  50      31.096  -6.220 -10.660  3.00  0.00           O  
ATOM   1591  C2'  DA A  50      29.169  -6.473  -9.120  5.00  0.00           C  
ATOM   1592  C1'  DA A  50      29.556  -7.877  -8.800  3.00  0.00           C  
ATOM   1593  N1   DA A  50      26.137 -11.596  -8.240  4.00  0.00           N  
ATOM   1594  C2   DA A  50      27.152 -11.448  -9.080  7.00  0.00           C  
ATOM   1595  N3   DA A  50      28.079 -10.384  -9.070  1.00  0.00           N  
ATOM   1596  C4   DA A  50      27.851  -9.560  -8.020  2.00  0.00           C  
ATOM   1597  C5   DA A  50      26.937  -9.635  -7.010  4.00  0.00           C  
ATOM   1598  C6   DA A  50      26.076 -10.793  -7.190  3.00  0.00           C  
ATOM   1599  N6   DA A  50      25.134 -11.106  -6.310  3.00  0.00           N  
ATOM   1600  N7   DA A  50      26.959  -8.480  -6.210  5.00  0.00           N  
ATOM   1601  C8   DA A  50      28.020  -7.836  -6.660  5.00  0.00           C  
ATOM   1602  N9   DA A  50      28.512  -8.371  -7.860  1.00  0.00           N  
ATOM   1603  OP1  DA A  50      32.657  -3.694  -5.390  3.00  0.00           O  
ATOM   1604  OP2  DA A  50      30.195  -3.687  -4.850  2.00  0.00           O1-
ATOM   1605  H2   DA A  50      27.166 -12.146  -9.950  8.00  0.00           H  
ATOM   1606  H8   DA A  50      28.466  -6.924  -6.270  0.00  0.00           H  
ATOM   1607  H1'  DA A  50      29.667  -8.419  -9.740  1.00  0.00           H  
ATOM   1608  H2'  DA A  50      28.670  -6.016  -8.290  2.00  0.00           H  
ATOM   1609  H3'  DA A  50      30.613  -4.829  -9.160  2.00  0.00           H  
ATOM   1610  H4'  DA A  50      32.377  -6.990  -8.800  7.00  0.00           H  
ATOM   1611  H5'  DA A  50      32.784  -6.340  -6.620  7.00  0.00           H  
ATOM   1612  H61  DA A  50      24.601 -11.978  -6.420  0.00  0.00           H  
ATOM   1613  H62  DA A  50      24.989 -10.616  -5.410  9.00  0.00           H  
ATOM   1614 H2''  DA A  50      28.567  -6.427 -10.000  9.00  0.00           H  
ATOM   1615 H5''  DA A  50      32.524  -4.913  -7.670  3.00  0.00           H  
ATOM   1616  P    DA A  51      30.858  -5.327 -11.930  5.00  0.00           P  
ATOM   1617  C5'  DA A  51      29.330  -7.156 -12.990  6.00  0.00           C  
ATOM   1618  O5'  DA A  51      29.417  -5.957 -12.330  3.00  0.00           O  
ATOM   1619  C4'  DA A  51      27.853  -7.626 -13.050  9.00  0.00           C  
ATOM   1620  O4'  DA A  51      27.290  -8.137 -11.850  9.00  0.00           O  
ATOM   1621  C3'  DA A  51      26.817  -6.582 -13.590  9.00  0.00           C  
ATOM   1622  O3'  DA A  51      26.393  -7.055 -14.850  0.00  0.00           O  
ATOM   1623  C2'  DA A  51      25.726  -6.614 -12.530  6.00  0.00           C  
ATOM   1624  C1'  DA A  51      25.908  -8.067 -11.940  8.00  0.00           C  
ATOM   1625  N1   DA A  51      22.741 -11.229  -9.350  8.00  0.00           N  
ATOM   1626  C2   DA A  51      23.242 -11.307 -10.600  9.00  0.00           C  
ATOM   1627  N3   DA A  51      23.966 -10.334 -11.200  8.00  0.00           N  
ATOM   1628  C4   DA A  51      24.324  -9.303 -10.420  4.00  0.00           C  
ATOM   1629  C5   DA A  51      23.954  -9.165  -9.150  1.00  0.00           C  
ATOM   1630  C6   DA A  51      23.010 -10.127  -8.650  6.00  0.00           C  
ATOM   1631  N6   DA A  51      22.417 -10.067  -7.470  0.00  0.00           N  
ATOM   1632  N7   DA A  51      24.635  -8.089  -8.530  2.00  0.00           N  
ATOM   1633  C8   DA A  51      25.275  -7.525  -9.530  1.00  0.00           C  
ATOM   1634  N9   DA A  51      25.194  -8.227 -10.690  6.00  0.00           N  
ATOM   1635  OP1  DA A  51      31.929  -5.688 -12.890  1.00  0.00           O  
ATOM   1636  OP2  DA A  51      30.735  -3.855 -11.560  1.00  0.00           O1-
ATOM   1637  H2   DA A  51      22.936 -12.159 -11.250  7.00  0.00           H  
ATOM   1638  H8   DA A  51      26.122  -6.777  -9.410  9.00  0.00           H  
ATOM   1639  H1'  DA A  51      25.497  -8.816 -12.660  9.00  0.00           H  
ATOM   1640  H2'  DA A  51      25.966  -5.845 -11.760  1.00  0.00           H  
ATOM   1641  H3'  DA A  51      27.222  -5.591 -13.660  3.00  0.00           H  
ATOM   1642  H4'  DA A  51      27.850  -8.443 -13.830  0.00  0.00           H  
ATOM   1643  H5'  DA A  51      29.878  -7.978 -12.570  2.00  0.00           H  
ATOM   1644  H61  DA A  51      21.861 -10.904  -7.210  0.00  0.00           H  
ATOM   1645  H62  DA A  51      22.285  -9.177  -6.990  0.00  0.00           H  
ATOM   1646 H2''  DA A  51      24.706  -6.468 -12.780  9.00  0.00           H  
ATOM   1647 H5''  DA A  51      29.546  -6.846 -13.950  2.00  0.00           H  
ATOM   1648  P    DC A  52      25.385  -6.262 -15.710  3.00  0.00           P  
ATOM   1649  C5'  DC A  52      24.128  -8.375 -16.260  4.00  0.00           C  
ATOM   1650  O5'  DC A  52      24.060  -7.096 -15.670  7.00  0.00           O  
ATOM   1651  C4'  DC A  52      22.937  -9.236 -15.910  3.00  0.00           C  
ATOM   1652  O4'  DC A  52      22.886  -9.400 -14.560  5.00  0.00           O  
ATOM   1653  C3'  DC A  52      21.627  -8.637 -16.420  2.00  0.00           C  
ATOM   1654  O3'  DC A  52      20.875  -9.547 -17.110  7.00  0.00           O  
ATOM   1655  C2'  DC A  52      20.910  -8.214 -15.070  1.00  0.00           C  
ATOM   1656  C1'  DC A  52      21.522  -9.254 -14.130  4.00  0.00           C  
ATOM   1657  N1   DC A  52      21.277  -8.892 -12.720  2.00  0.00           N  
ATOM   1658  C2   DC A  52      20.303  -9.538 -11.990  6.00  0.00           C  
ATOM   1659  O2   DC A  52      19.691 -10.535 -12.330  0.00  0.00           O  
ATOM   1660  N3   DC A  52      19.829  -9.091 -10.820  7.00  0.00           N  
ATOM   1661  C4   DC A  52      20.243  -7.927 -10.370  5.00  0.00           C  
ATOM   1662  N4   DC A  52      19.573  -7.468  -9.390  5.00  0.00           N  
ATOM   1663  C5   DC A  52      21.388  -7.341 -10.950  7.00  0.00           C  
ATOM   1664  C6   DC A  52      21.910  -7.805 -12.140  5.00  0.00           C  
ATOM   1665  OP1  DC A  52      25.917  -6.332 -17.050  9.00  0.00           O  
ATOM   1666  OP2  DC A  52      25.210  -4.902 -15.080  1.00  0.00           O1-
ATOM   1667  H5   DC A  52      21.880  -6.521 -10.410  7.00  0.00           H  
ATOM   1668  H6   DC A  52      22.812  -7.350 -12.530  8.00  0.00           H  
ATOM   1669  H1'  DC A  52      20.990 -10.212 -14.330  2.00  0.00           H  
ATOM   1670  H2'  DC A  52      21.191  -7.172 -14.790  2.00  0.00           H  
ATOM   1671  H3'  DC A  52      21.843  -7.801 -17.080  2.00  0.00           H  
ATOM   1672  H4'  DC A  52      23.195 -10.206 -16.230  7.00  0.00           H  
ATOM   1673  H41  DC A  52      18.709  -7.952  -9.150  7.00  0.00           H  
ATOM   1674  H5'  DC A  52      24.964  -8.892 -15.860  7.00  0.00           H  
ATOM   1675  H42  DC A  52      19.806  -6.611  -8.870  4.00  0.00           H  
ATOM   1676 H2''  DC A  52      19.892  -8.489 -15.050  7.00  0.00           H  
ATOM   1677 H5''  DC A  52      24.314  -8.313 -17.310  6.00  0.00           H  
ATOM   1678  P    DC A  53      19.573  -9.157 -17.900  9.00  0.00           P  
ATOM   1679  C5'  DC A  53      18.403 -11.304 -16.920  1.00  0.00           C  
ATOM   1680  O5'  DC A  53      18.460  -9.857 -17.040  5.00  0.00           O  
ATOM   1681  C4'  DC A  53      17.145 -11.817 -16.170  8.00  0.00           C  
ATOM   1682  O4'  DC A  53      17.144 -11.368 -14.820  0.00  0.00           O  
ATOM   1683  C3'  DC A  53      15.889 -11.193 -16.860  0.00  0.00           C  
ATOM   1684  O3'  DC A  53      14.905 -12.153 -17.130  3.00  0.00           O  
ATOM   1685  C2'  DC A  53      15.533 -10.045 -15.860  2.00  0.00           C  
ATOM   1686  C1'  DC A  53      15.922 -10.632 -14.550  0.00  0.00           C  
ATOM   1687  N1   DC A  53      16.204  -9.660 -13.460  0.00  0.00           N  
ATOM   1688  C2   DC A  53      15.520  -9.844 -12.200  6.00  0.00           C  
ATOM   1689  O2   DC A  53      14.621 -10.719 -12.090  2.00  0.00           O  
ATOM   1690  N3   DC A  53      15.789  -8.994 -11.170  2.00  0.00           N  
ATOM   1691  C4   DC A  53      16.620  -8.004 -11.390  7.00  0.00           C  
ATOM   1692  N4   DC A  53      16.662  -7.111 -10.400  7.00  0.00           N  
ATOM   1693  C5   DC A  53      17.255  -7.738 -12.630  7.00  0.00           C  
ATOM   1694  C6   DC A  53      16.971  -8.518 -13.640  4.00  0.00           C  
ATOM   1695  OP1  DC A  53      19.651  -9.797 -19.250  2.00  0.00           O  
ATOM   1696  OP2  DC A  53      19.443  -7.687 -17.800  5.00  0.00           O1-
ATOM   1697  H5   DC A  53      17.930  -6.958 -12.840  4.00  0.00           H  
ATOM   1698  H6   DC A  53      17.478  -8.347 -14.630  2.00  0.00           H  
ATOM   1699  H1'  DC A  53      15.170 -11.403 -14.330  3.00  0.00           H  
ATOM   1700  H2'  DC A  53      16.108  -9.102 -16.070  7.00  0.00           H  
ATOM   1701  H3'  DC A  53      16.167 -10.635 -17.690  3.00  0.00           H  
ATOM   1702  H4'  DC A  53      17.103 -12.911 -16.200  7.00  0.00           H  
ATOM   1703  H41  DC A  53      16.053  -7.289  -9.610  1.00  0.00           H  
ATOM   1704  H5'  DC A  53      19.331 -11.755 -16.400  3.00  0.00           H  
ATOM   1705  H42  DC A  53      17.012  -6.137 -10.620  7.00  0.00           H  
ATOM   1706 H2''  DC A  53      14.442  -9.833 -15.920  5.00  0.00           H  
ATOM   1707 H5''  DC A  53      18.350 -11.702 -17.900  6.00  0.00           H  
ATOM   1708  P    DC A  54      13.470 -11.843 -18.010  7.00  0.00           P  
ATOM   1709  C5'  DC A  54      11.901 -12.545 -15.970  0.00  0.00           C  
ATOM   1710  O5'  DC A  54      12.443 -11.523 -16.810  0.00  0.00           O  
ATOM   1711  C4'  DC A  54      11.018 -12.093 -14.810  6.00  0.00           C  
ATOM   1712  O4'  DC A  54      11.679 -11.411 -13.780  3.00  0.00           O  
ATOM   1713  C3'  DC A  54       9.839 -11.127 -15.080  7.00  0.00           C  
ATOM   1714  O3'  DC A  54       8.736 -11.999 -15.640  9.00  0.00           O  
ATOM   1715  C2'  DC A  54       9.449 -10.499 -13.760  3.00  0.00           C  
ATOM   1716  C1'  DC A  54      10.711 -10.662 -12.930  9.00  0.00           C  
ATOM   1717  N1   DC A  54      11.253  -9.344 -12.440  0.00  0.00           N  
ATOM   1718  C2   DC A  54      11.019  -8.943 -11.130  1.00  0.00           C  
ATOM   1719  O2   DC A  54      10.292  -9.595 -10.380  7.00  0.00           O  
ATOM   1720  N3   DC A  54      11.612  -7.855 -10.600  2.00  0.00           N  
ATOM   1721  C4   DC A  54      12.635  -7.339 -11.230  0.00  0.00           C  
ATOM   1722  N4   DC A  54      13.216  -6.386 -10.610  6.00  0.00           N  
ATOM   1723  C5   DC A  54      12.859  -7.595 -12.670  1.00  0.00           C  
ATOM   1724  C6   DC A  54      12.085  -8.582 -13.240  3.00  0.00           C  
ATOM   1725  OP1  DC A  54      13.120 -13.025 -18.680  7.00  0.00           O  
ATOM   1726  OP2  DC A  54      13.818 -10.720 -18.800  7.00  0.00           O1-
ATOM   1727  H5   DC A  54      13.568  -7.028 -13.320  0.00  0.00           H  
ATOM   1728  H6   DC A  54      12.211  -8.841 -14.280  7.00  0.00           H  
ATOM   1729  H1'  DC A  54      10.447 -11.284 -12.050  3.00  0.00           H  
ATOM   1730  H2'  DC A  54       9.156  -9.471 -13.910  1.00  0.00           H  
ATOM   1731  H3'  DC A  54      10.152 -10.374 -15.790  6.00  0.00           H  
ATOM   1732  H4'  DC A  54      10.755 -13.026 -14.400  5.00  0.00           H  
ATOM   1733  H41  DC A  54      12.819  -6.155  -9.680  9.00  0.00           H  
ATOM   1734  H5'  DC A  54      12.747 -13.224 -15.690  2.00  0.00           H  
ATOM   1735  H42  DC A  54      13.959  -5.868 -11.090  3.00  0.00           H  
ATOM   1736 H2''  DC A  54       8.604 -11.141 -13.380  6.00  0.00           H  
ATOM   1737 H5''  DC A  54      11.164 -13.155 -16.600  5.00  0.00           H  
ATOM   1738  P    DT A  55       7.486 -11.263 -16.470  5.00  0.00           P  
ATOM   1739  C5'  DT A  55       5.661 -11.373 -14.560  2.00  0.00           C  
ATOM   1740  O5'  DT A  55       6.552 -10.651 -15.320  8.00  0.00           O  
ATOM   1741  C4'  DT A  55       5.100 -10.505 -13.390  7.00  0.00           C  
ATOM   1742  O4'  DT A  55       6.010 -10.135 -12.380  1.00  0.00           O  
ATOM   1743  C3'  DT A  55       4.424  -9.191 -13.850  9.00  0.00           C  
ATOM   1744  O3'  DT A  55       3.062  -9.541 -14.220  2.00  0.00           O  
ATOM   1745  C2'  DT A  55       4.470  -8.368 -12.600  5.00  0.00           C  
ATOM   1746  C1'  DT A  55       5.569  -8.915 -11.740  7.00  0.00           C  
ATOM   1747  N1   DT A  55       6.643  -7.906 -11.500  7.00  0.00           N  
ATOM   1748  C2   DT A  55       6.654  -7.270 -10.250  0.00  0.00           C  
ATOM   1749  O2   DT A  55       5.771  -7.537  -9.420  8.00  0.00           O  
ATOM   1750  N3   DT A  55       7.605  -6.325  -9.980  6.00  0.00           N  
ATOM   1751  C4   DT A  55       8.586  -6.003 -10.860  5.00  0.00           C  
ATOM   1752  O4   DT A  55       9.313  -5.040 -10.590  4.00  0.00           O  
ATOM   1753  C5   DT A  55       8.523  -6.701 -12.110  9.00  0.00           C  
ATOM   1754  C6   DT A  55       7.568  -7.589 -12.390  9.00  0.00           C  
ATOM   1755  C7   DT A  55       9.486  -6.330 -13.230  3.00  0.00           C  
ATOM   1756  OP1  DT A  55       6.734 -12.383 -17.080  5.00  0.00           O  
ATOM   1757  OP2  DT A  55       8.078 -10.236 -17.320  7.00  0.00           O1-
ATOM   1758  H3   DT A  55       7.680  -5.938  -9.090  2.00  0.00           H  
ATOM   1759  H6   DT A  55       7.454  -8.171 -13.410  1.00  0.00           H  
ATOM   1760  H1'  DT A  55       5.051  -9.200 -10.910  2.00  0.00           H  
ATOM   1761  H2'  DT A  55       4.695  -7.331 -12.930  7.00  0.00           H  
ATOM   1762  H3'  DT A  55       5.105  -8.743 -14.640  8.00  0.00           H  
ATOM   1763  H4'  DT A  55       4.349 -11.156 -12.930  3.00  0.00           H  
ATOM   1764  H5'  DT A  55       6.253 -12.200 -14.110  1.00  0.00           H  
ATOM   1765  H71  DT A  55       9.041  -5.577 -13.890  6.00  0.00           H  
ATOM   1766  H72  DT A  55      10.402  -5.939 -12.740  1.00  0.00           H  
ATOM   1767  H73  DT A  55       9.730  -7.212 -13.860  6.00  0.00           H  
ATOM   1768 H2''  DT A  55       3.539  -8.350 -12.010  9.00  0.00           H  
ATOM   1769 H5''  DT A  55       4.883 -11.744 -15.160  8.00  0.00           H  
ATOM   1770  P    DA A  56       1.858  -8.510 -14.530  1.00  0.00           P  
ATOM   1771  C5'  DA A  56       0.555  -9.135 -12.310  3.00  0.00           C  
ATOM   1772  O5'  DA A  56       1.217  -8.161 -13.070  6.00  0.00           O  
ATOM   1773  C4'  DA A  56       0.129  -8.528 -10.900  7.00  0.00           C  
ATOM   1774  O4'  DA A  56       1.223  -7.875 -10.290  5.00  0.00           O  
ATOM   1775  C3'  DA A  56      -0.855  -7.430 -11.040  6.00  0.00           C  
ATOM   1776  O3'  DA A  56      -1.868  -7.684 -10.080  2.00  0.00           O  
ATOM   1777  C2'  DA A  56      -0.167  -6.083 -10.960  7.00  0.00           C  
ATOM   1778  C1'  DA A  56       0.921  -6.500  -9.990  9.00  0.00           C  
ATOM   1779  N1   DA A  56       4.722  -3.436  -8.190  7.00  0.00           N  
ATOM   1780  C2   DA A  56       3.774  -4.059  -7.540  6.00  0.00           C  
ATOM   1781  N3   DA A  56       2.823  -4.799  -8.040  5.00  0.00           N  
ATOM   1782  C4   DA A  56       2.971  -4.974  -9.420  0.00  0.00           C  
ATOM   1783  C5   DA A  56       3.977  -4.516 -10.210  3.00  0.00           C  
ATOM   1784  C6   DA A  56       4.872  -3.654  -9.500  1.00  0.00           C  
ATOM   1785  N6   DA A  56       5.992  -3.081  -9.950  4.00  0.00           N  
ATOM   1786  N7   DA A  56       4.023  -5.000 -11.520  4.00  0.00           N  
ATOM   1787  C8   DA A  56       2.902  -5.672 -11.450  4.00  0.00           C  
ATOM   1788  N9   DA A  56       2.158  -5.711 -10.250  0.00  0.00           N  
ATOM   1789  OP1  DA A  56       0.850  -9.296 -15.240  9.00  0.00           O  
ATOM   1790  OP2  DA A  56       2.492  -7.281 -15.090  8.00  0.00           O1-
ATOM   1791  H2   DA A  56       3.726  -3.883  -6.450  7.00  0.00           H  
ATOM   1792  H8   DA A  56       2.557  -6.300 -12.240  7.00  0.00           H  
ATOM   1793  H1'  DA A  56       0.631  -6.388  -8.920  3.00  0.00           H  
ATOM   1794  H2'  DA A  56       0.278  -5.846 -11.950  2.00  0.00           H  
ATOM   1795  H3'  DA A  56      -1.445  -7.612 -11.970  6.00  0.00           H  
ATOM   1796  H4'  DA A  56      -0.356  -9.288 -10.340  9.00  0.00           H  
ATOM   1797  H5'  DA A  56       1.191 -10.068 -12.110  2.00  0.00           H  
ATOM   1798  H61  DA A  56       6.455  -2.556  -9.240  8.00  0.00           H  
ATOM   1799  H62  DA A  56       6.362  -3.343 -10.840  2.00  0.00           H  
ATOM   1800 H2''  DA A  56      -0.756  -5.276 -10.530  1.00  0.00           H  
ATOM   1801 H5''  DA A  56      -0.316  -9.564 -12.720  4.00  0.00           H  
ATOM   1802  P    DA A  57      -3.190  -6.722 -10.170  7.00  0.00           P  
ATOM   1803  C5'  DA A  57      -2.723  -5.209  -8.010  1.00  0.00           C  
ATOM   1804  O5'  DA A  57      -2.959  -5.292  -9.400  9.00  0.00           O  
ATOM   1805  C4'  DA A  57      -2.256  -3.783  -7.530  8.00  0.00           C  
ATOM   1806  O4'  DA A  57      -0.881  -3.646  -7.830  5.00  0.00           O  
ATOM   1807  C3'  DA A  57      -2.991  -2.674  -8.320  2.00  0.00           C  
ATOM   1808  O3'  DA A  57      -3.529  -1.759  -7.360  9.00  0.00           O  
ATOM   1809  C2'  DA A  57      -1.832  -1.946  -9.030  5.00  0.00           C  
ATOM   1810  C1'  DA A  57      -0.723  -2.254  -8.050  1.00  0.00           C  
ATOM   1811  N1   DA A  57       3.076   1.172  -8.090  0.00  0.00           N  
ATOM   1812  C2   DA A  57       2.104   0.929  -7.250  5.00  0.00           C  
ATOM   1813  N3   DA A  57       1.174  -0.012  -7.230  1.00  0.00           N  
ATOM   1814  C4   DA A  57       1.351  -0.840  -8.250  2.00  0.00           C  
ATOM   1815  C5   DA A  57       2.296  -0.735  -9.260  5.00  0.00           C  
ATOM   1816  C6   DA A  57       3.153   0.391  -9.150  2.00  0.00           C  
ATOM   1817  N6   DA A  57       4.177   0.596  -9.950  2.00  0.00           N  
ATOM   1818  N7   DA A  57       2.246  -1.821 -10.130  9.00  0.00           N  
ATOM   1819  C8   DA A  57       1.173  -2.456  -9.700  9.00  0.00           C  
ATOM   1820  N9   DA A  57       0.589  -1.949  -8.580  9.00  0.00           N  
ATOM   1821  OP1  DA A  57      -4.133  -7.458  -9.350  3.00  0.00           O  
ATOM   1822  OP2  DA A  57      -3.568  -6.340 -11.540  5.00  0.00           O1-
ATOM   1823  H2   DA A  57       2.026   1.579  -6.360  1.00  0.00           H  
ATOM   1824  H8   DA A  57       0.840  -3.363 -10.130  6.00  0.00           H  
ATOM   1825  H1'  DA A  57      -0.909  -1.697  -7.150  1.00  0.00           H  
ATOM   1826  H2'  DA A  57      -1.411  -2.399  -9.980  0.00  0.00           H  
ATOM   1827  H3'  DA A  57      -3.654  -3.171  -9.020  8.00  0.00           H  
ATOM   1828  H4'  DA A  57      -2.503  -3.591  -6.480  6.00  0.00           H  
ATOM   1829  H5'  DA A  57      -1.961  -5.935  -7.730  8.00  0.00           H  
ATOM   1830  H61  DA A  57       4.634   1.451  -9.740  3.00  0.00           H  
ATOM   1831  H62  DA A  57       4.280   0.209 -10.900  5.00  0.00           H  
ATOM   1832 H2''  DA A  57      -2.036  -0.939  -9.030  5.00  0.00           H  
ATOM   1833 H5''  DA A  57      -3.599  -5.447  -7.450  4.00  0.00           H  
ATOM   1834  P   DCP A  58      -4.934  -1.104  -7.570  3.00  0.00           P  
ATOM   1835  C5' DCP A  58      -4.102   1.213  -8.570  4.00  0.00           C  
ATOM   1836  O5' DCP A  58      -4.710  -0.033  -8.720  7.00  0.00           O  
ATOM   1837  C4' DCP A  58      -4.115   2.029  -9.860  9.00  0.00           C  
ATOM   1838  O4' DCP A  58      -3.582   1.269 -10.980  4.00  0.00           O  
ATOM   1839  C3' DCP A  58      -5.435   2.503 -10.330  2.00  0.00           C  
ATOM   1840  O3' DCP A  58      -5.456   3.850 -10.860  9.00  0.00           O  
ATOM   1841  C2' DCP A  58      -5.926   1.475 -11.290  1.00  0.00           C  
ATOM   1842  C1' DCP A  58      -4.629   0.949 -11.930  1.00  0.00           C  
ATOM   1843  N1  DCP A  58      -4.706  -0.512 -12.240  1.00  0.00           N  
ATOM   1844  C2  DCP A  58      -5.531  -0.953 -13.280  1.00  0.00           C  
ATOM   1845  O2  DCP A  58      -6.119  -0.093 -13.920  7.00  0.00           O  
ATOM   1846  N3  DCP A  58      -5.667  -2.320 -13.570  9.00  0.00           N  
ATOM   1847  C4  DCP A  58      -4.924  -3.184 -12.900  8.00  0.00           C  
ATOM   1848  N4  DCP A  58      -5.102  -4.455 -13.120  6.00  0.00           N  
ATOM   1849  C5  DCP A  58      -4.114  -2.786 -11.880  7.00  0.00           C  
ATOM   1850  C6  DCP A  58      -4.094  -1.478 -11.540  7.00  0.00           C  
ATOM   1851  OP1 DCP A  58      -5.310  -0.439  -6.330  4.00  0.00           O  
ATOM   1852  OP2 DCP A  58      -5.818  -2.197  -8.060  2.00  0.00           O  
ATOM   1853  H3  DCP A  58      -6.211  -2.540 -14.390  9.00  0.00           H  
ATOM   1854  H5  DCP A  58      -3.523  -3.481 -11.330  4.00  0.00           H  
ATOM   1855  H6  DCP A  58      -3.516  -1.168 -10.710  0.00  0.00           H  
ATOM   1856  H1' DCP A  58      -4.451   1.518 -12.890  7.00  0.00           H  
ATOM   1857  H2' DCP A  58      -6.449   0.744 -10.670  0.00  0.00           H  
ATOM   1858  H3' DCP A  58      -6.049   2.503  -9.440  4.00  0.00           H  
ATOM   1859  H4' DCP A  58      -3.391   2.905  -9.730  1.00  0.00           H  
ATOM   1860  H41 DCP A  58      -5.692  -4.770 -13.910  9.00  0.00           H  
ATOM   1861  H5' DCP A  58      -3.091   1.127  -8.150  5.00  0.00           H  
ATOM   1862  H42 DCP A  58      -4.539  -5.117 -12.590  8.00  0.00           H  
ATOM   1863 H2'' DCP A  58      -6.718   1.797 -11.960  2.00  0.00           H  
ATOM   1864 H5'' DCP A  58      -4.524   1.882  -7.830  4.00  0.00           H  
ATOM   1865  P   DCP A  59      -5.602   5.025  -9.820  4.00  0.00           P  
ATOM   1866  C5' DCP A  59      -8.240   4.771  -9.440  0.00  0.00           C  
ATOM   1867  O5' DCP A  59      -6.899   4.653  -8.910  2.00  0.00           O  
ATOM   1868  C4' DCP A  59      -9.182   3.720  -8.790  8.00  0.00           C  
ATOM   1869  O4' DCP A  59      -8.789   2.365  -9.030  6.00  0.00           O  
ATOM   1870  C3' DCP A  59      -9.424   3.932  -7.270  1.00  0.00           C  
ATOM   1871  O3' DCP A  59     -10.735   4.412  -7.010  5.00  0.00           O  
ATOM   1872  C2' DCP A  59      -9.243   2.483  -6.760  9.00  0.00           C  
ATOM   1873  C1' DCP A  59      -9.554   1.685  -8.020  8.00  0.00           C  
ATOM   1874  N1  DCP A  59      -9.306   0.208  -7.900  3.00  0.00           N  
ATOM   1875  C2  DCP A  59      -9.985  -0.586  -8.790  0.00  0.00           C  
ATOM   1876  O2  DCP A  59     -10.694  -0.118  -9.640  4.00  0.00           O  
ATOM   1877  N3  DCP A  59      -9.835  -1.944  -8.800  2.00  0.00           N  
ATOM   1878  C4  DCP A  59      -9.115  -2.518  -7.860  5.00  0.00           C  
ATOM   1879  N4  DCP A  59      -8.939  -3.791  -7.820  9.00  0.00           N  
ATOM   1880  C5  DCP A  59      -8.526  -1.765  -6.840  0.00  0.00           C  
ATOM   1881  C6  DCP A  59      -8.582  -0.422  -6.870  6.00  0.00           C  
ATOM   1882  OP1 DCP A  59      -5.779   6.216 -10.680  7.00  0.00           O  
ATOM   1883  OP2 DCP A  59      -4.408   4.906  -8.980  6.00  0.00           O  
ATOM   1884  H3  DCP A  59     -10.256  -2.482  -9.550  3.00  0.00           H  
ATOM   1885  H5  DCP A  59      -8.177  -2.352  -5.990  2.00  0.00           H  
ATOM   1886  H6  DCP A  59      -8.341   0.153  -5.990  6.00  0.00           H  
ATOM   1887  H1' DCP A  59     -10.640   1.854  -8.270  9.00  0.00           H  
ATOM   1888  H2' DCP A  59      -8.193   2.364  -6.390  7.00  0.00           H  
ATOM   1889  H3' DCP A  59      -8.639   4.543  -6.870  8.00  0.00           H  
ATOM   1890  H4' DCP A  59     -10.122   3.875  -9.320  9.00  0.00           H  
ATOM   1891  H41 DCP A  59      -9.401  -4.359  -8.580  3.00  0.00           H  
ATOM   1892  H5' DCP A  59      -8.316   4.547 -10.550  6.00  0.00           H  
ATOM   1893  H42 DCP A  59      -8.395  -4.264  -7.130  4.00  0.00           H  
ATOM   1894 H2'' DCP A  59      -9.985   2.267  -5.960  3.00  0.00           H  
ATOM   1895 H5'' DCP A  59      -8.727   5.743  -9.310  5.00  0.00           H  
ATOM   1896  P   DCP A  60     -11.179   5.135  -5.640  1.00  0.00           P  
ATOM   1897  C5' DCP A  60     -11.908   4.004  -3.410  5.00  0.00           C  
ATOM   1898  O5' DCP A  60     -11.043   4.005  -4.530  7.00  0.00           O  
ATOM   1899  C4' DCP A  60     -13.241   3.341  -3.770  4.00  0.00           C  
ATOM   1900  O4' DCP A  60     -12.931   1.935  -3.920  7.00  0.00           O  
ATOM   1901  C3' DCP A  60     -14.170   3.358  -2.560  4.00  0.00           C  
ATOM   1902  O3' DCP A  60     -14.878   4.602  -2.400  5.00  0.00           O  
ATOM   1903  C2' DCP A  60     -15.087   2.187  -2.740  3.00  0.00           C  
ATOM   1904  C1' DCP A  60     -14.240   1.411  -3.800  5.00  0.00           C  
ATOM   1905  N1  DCP A  60     -14.216  -0.026  -3.480  5.00  0.00           N  
ATOM   1906  C2  DCP A  60     -14.829  -0.951  -4.350  0.00  0.00           C  
ATOM   1907  O2  DCP A  60     -15.606  -0.601  -5.280  7.00  0.00           O  
ATOM   1908  N3  DCP A  60     -14.648  -2.321  -4.110  2.00  0.00           N  
ATOM   1909  C4  DCP A  60     -13.833  -2.737  -3.200  8.00  0.00           C  
ATOM   1910  N4  DCP A  60     -13.658  -4.017  -3.180  6.00  0.00           N  
ATOM   1911  C5  DCP A  60     -13.195  -1.805  -2.350  4.00  0.00           C  
ATOM   1912  C6  DCP A  60     -13.362  -0.445  -2.530  9.00  0.00           C  
ATOM   1913  OP1 DCP A  60     -12.615   5.414  -5.800  4.00  0.00           O  
ATOM   1914  OP2 DCP A  60     -10.214   6.174  -5.400  5.00  0.00           O  
ATOM   1915  H3  DCP A  60     -15.090  -3.009  -4.730  5.00  0.00           H  
ATOM   1916  H5  DCP A  60     -12.514  -2.151  -1.660  2.00  0.00           H  
ATOM   1917  H6  DCP A  60     -12.817   0.224  -1.910  4.00  0.00           H  
ATOM   1918  H1' DCP A  60     -14.745   1.450  -4.760  2.00  0.00           H  
ATOM   1919  H2' DCP A  60     -15.217   1.599  -1.690  9.00  0.00           H  
ATOM   1920  H3' DCP A  60     -13.593   3.136  -1.580  6.00  0.00           H  
ATOM   1921  H4' DCP A  60     -13.637   3.823  -4.660  5.00  0.00           H  
ATOM   1922  H41 DCP A  60     -14.126  -4.570  -3.850  5.00  0.00           H  
ATOM   1923  H5' DCP A  60     -12.056   4.889  -2.790  5.00  0.00           H  
ATOM   1924  H42 DCP A  60     -12.980  -4.513  -2.460  7.00  0.00           H  
ATOM   1925 H2'' DCP A  60     -15.944   2.505  -3.150  0.00  0.00           H  
ATOM   1926 H5'' DCP A  60     -11.483   3.338  -2.730  8.00  0.00           H  
ATOM   1927  P    DT A  61     -15.406   5.205  -1.040  7.00  0.00           P  
ATOM   1928  C5'  DT A  61     -17.441   4.028   0.080  7.00  0.00           C  
ATOM   1929  O5'  DT A  61     -16.148   3.958  -0.430  2.00  0.00           O  
ATOM   1930  C4'  DT A  61     -17.696   2.879   1.060  7.00  0.00           C  
ATOM   1931  O4'  DT A  61     -19.087   2.849   1.470  9.00  0.00           O  
ATOM   1932  C3'  DT A  61     -17.439   1.516   0.390  3.00  0.00           C  
ATOM   1933  O3'  DT A  61     -16.717   0.595   1.220  7.00  0.00           O  
ATOM   1934  C2'  DT A  61     -18.877   1.077   0.130  6.00  0.00           C  
ATOM   1935  C1'  DT A  61     -19.483   1.485   1.460  8.00  0.00           C  
ATOM   1936  N1   DT A  61     -20.971   1.390   1.700  7.00  0.00           N  
ATOM   1937  C2   DT A  61     -21.441   1.041   2.980  4.00  0.00           C  
ATOM   1938  O2   DT A  61     -20.703   0.669   3.910  4.00  0.00           O  
ATOM   1939  N3   DT A  61     -22.785   1.013   3.220  3.00  0.00           N  
ATOM   1940  C4   DT A  61     -23.758   1.479   2.280  9.00  0.00           C  
ATOM   1941  O4   DT A  61     -24.972   1.501   2.630  4.00  0.00           O  
ATOM   1942  C5   DT A  61     -23.198   1.774   0.940  6.00  0.00           C  
ATOM   1943  C6   DT A  61     -21.833   1.707   0.710  7.00  0.00           C  
ATOM   1944  C7   DT A  61     -24.092   2.549  -0.010  5.00  0.00           C  
ATOM   1945  OP1  DT A  61     -16.351   6.313  -1.280  8.00  0.00           O  
ATOM   1946  OP2  DT A  61     -14.202   5.293  -0.180  7.00  0.00           O1-
ATOM   1947  H3   DT A  61     -23.127   0.483   4.050  4.00  0.00           H  
ATOM   1948  H6   DT A  61     -21.479   2.050  -0.230  7.00  0.00           H  
ATOM   1949  H1'  DT A  61     -19.083   0.916   2.320  4.00  0.00           H  
ATOM   1950  H2'  DT A  61     -19.322   1.605  -0.680  0.00  0.00           H  
ATOM   1951  H3'  DT A  61     -17.017   1.640  -0.630  4.00  0.00           H  
ATOM   1952  H4'  DT A  61     -17.048   2.935   1.960  4.00  0.00           H  
ATOM   1953  H5'  DT A  61     -18.176   4.093  -0.660  5.00  0.00           H  
ATOM   1954  H71  DT A  61     -24.919   2.012  -0.360  2.00  0.00           H  
ATOM   1955  H72  DT A  61     -23.628   2.860  -0.980  7.00  0.00           H  
ATOM   1956  H73  DT A  61     -24.460   3.488   0.520  1.00  0.00           H  
ATOM   1957 H2''  DT A  61     -19.033   0.037  -0.050  1.00  0.00           H  
ATOM   1958 H5''  DT A  61     -17.605   4.924   0.730  7.00  0.00           H  
ATOM   1959  P    DA A  62     -16.449  -0.926   0.800  6.00  0.00           P  
ATOM   1960  C5'  DA A  62     -18.045  -2.190   2.500  1.00  0.00           C  
ATOM   1961  O5'  DA A  62     -17.746  -1.821   1.160  1.00  0.00           O  
ATOM   1962  C4'  DA A  62     -19.552  -2.656   2.730  2.00  0.00           C  
ATOM   1963  O4'  DA A  62     -20.447  -1.779   2.130  0.00  0.00           O  
ATOM   1964  C3'  DA A  62     -19.785  -4.059   2.080  1.00  0.00           C  
ATOM   1965  O3'  DA A  62     -20.815  -4.801   2.650  4.00  0.00           O  
ATOM   1966  C2'  DA A  62     -20.198  -3.642   0.690  0.00  0.00           C  
ATOM   1967  C1'  DA A  62     -21.151  -2.567   1.150  6.00  0.00           C  
ATOM   1968  N1   DA A  62     -25.401  -0.633  -0.800  3.00  0.00           N  
ATOM   1969  C2   DA A  62     -25.091  -1.248   0.360  1.00  0.00           C  
ATOM   1970  N3   DA A  62     -23.914  -1.619   0.830  4.00  0.00           N  
ATOM   1971  C4   DA A  62     -22.947  -1.426  -0.120  5.00  0.00           C  
ATOM   1972  C5   DA A  62     -23.095  -0.807  -1.320  4.00  0.00           C  
ATOM   1973  C6   DA A  62     -24.391  -0.374  -1.630  3.00  0.00           C  
ATOM   1974  N6   DA A  62     -24.764   0.136  -2.720  7.00  0.00           N  
ATOM   1975  N7   DA A  62     -21.894  -0.828  -2.020  2.00  0.00           N  
ATOM   1976  C8   DA A  62     -21.112  -1.459  -1.210  4.00  0.00           C  
ATOM   1977  N9   DA A  62     -21.685  -1.792   0.000  7.00  0.00           N  
ATOM   1978  OP1  DA A  62     -15.386  -1.291   1.730  7.00  0.00           O  
ATOM   1979  OP2  DA A  62     -16.246  -0.983  -0.620  9.00  0.00           O1-
ATOM   1980  H2   DA A  62     -25.906  -1.297   1.020  4.00  0.00           H  
ATOM   1981  H8   DA A  62     -20.120  -1.632  -1.430  2.00  0.00           H  
ATOM   1982  H1'  DA A  62     -21.960  -3.109   1.560  6.00  0.00           H  
ATOM   1983  H2'  DA A  62     -19.293  -3.278   0.250  4.00  0.00           H  
ATOM   1984  H3'  DA A  62     -18.791  -4.617   1.930  2.00  0.00           H  
ATOM   1985  H4'  DA A  62     -19.828  -2.677   3.780  2.00  0.00           H  
ATOM   1986  H5'  DA A  62     -18.029  -1.225   3.070  6.00  0.00           H  
ATOM   1987  H61  DA A  62     -25.700   0.094  -3.030  3.00  0.00           H  
ATOM   1988  H62  DA A  62     -24.112   0.591  -3.330  6.00  0.00           H  
ATOM   1989 H2''  DA A  62     -20.751  -4.354   0.110  8.00  0.00           H  
ATOM   1990 H5''  DA A  62     -17.292  -2.916   2.890  8.00  0.00           H  
ATOM   1991  P    DA A  63     -20.466  -5.698   3.810  6.00  0.00           P  
ATOM   1992  C5'  DA A  63     -19.728  -8.156   3.820  2.00  0.00           C  
ATOM   1993  O5'  DA A  63     -20.012  -6.975   3.070  9.00  0.00           O  
ATOM   1994  C4'  DA A  63     -19.070  -9.117   2.850  4.00  0.00           C  
ATOM   1995  O4'  DA A  63     -19.855  -9.255   1.660  8.00  0.00           O  
ATOM   1996  C3'  DA A  63     -17.739  -8.612   2.430  0.00  0.00           C  
ATOM   1997  O3'  DA A  63     -16.796  -9.697   2.520  8.00  0.00           O  
ATOM   1998  C2'  DA A  63     -17.950  -8.122   1.010  9.00  0.00           C  
ATOM   1999  C1'  DA A  63     -19.072  -8.982   0.510  7.00  0.00           C  
ATOM   2000  N1   DA A  63     -20.406  -8.709  -4.620  4.00  0.00           N  
ATOM   2001  C2   DA A  63     -19.460  -9.467  -4.020  9.00  0.00           C  
ATOM   2002  N3   DA A  63     -19.160  -9.464  -2.690  3.00  0.00           N  
ATOM   2003  C4   DA A  63     -19.960  -8.604  -1.960  4.00  0.00           C  
ATOM   2004  C5   DA A  63     -20.829  -7.671  -2.470  7.00  0.00           C  
ATOM   2005  C6   DA A  63     -21.041  -7.818  -3.860  7.00  0.00           C  
ATOM   2006  N6   DA A  63     -21.809  -7.047  -4.540  2.00  0.00           N  
ATOM   2007  N7   DA A  63     -21.319  -6.784  -1.440  6.00  0.00           N  
ATOM   2008  C8   DA A  63     -20.746  -7.280  -0.400  1.00  0.00           C  
ATOM   2009  N9   DA A  63     -19.893  -8.308  -0.560  7.00  0.00           N  
ATOM   2010  OP1  DA A  63     -21.698  -5.962   4.560  2.00  0.00           O  
ATOM   2011  OP2  DA A  63     -19.351  -5.212   4.620  8.00  0.00           O1-
ATOM   2012  H2   DA A  63     -18.880 -10.220  -4.540  1.00  0.00           H  
ATOM   2013  H8   DA A  63     -20.812  -6.834   0.630  0.00  0.00           H  
ATOM   2014  H1'  DA A  63     -18.681  -9.920   0.070  5.00  0.00           H  
ATOM   2015  H2'  DA A  63     -18.275  -7.102   0.990  3.00  0.00           H  
ATOM   2016  H3'  DA A  63     -17.392  -7.796   3.090  8.00  0.00           H  
ATOM   2017  H4'  DA A  63     -18.803 -10.009   3.330  8.00  0.00           H  
ATOM   2018  H5'  DA A  63     -20.560  -8.664   4.280  6.00  0.00           H  
ATOM   2019  H61  DA A  63     -21.757  -7.053  -5.530  0.00  0.00           H  
ATOM   2020  H62  DA A  63     -22.277  -6.330  -4.010  2.00  0.00           H  
ATOM   2021 H2''  DA A  63     -17.104  -8.236   0.400  2.00  0.00           H  
ATOM   2022 H5''  DA A  63     -19.039  -8.006   4.650  1.00  0.00           H  
ATOM   2023  P   DCP A  64     -15.198  -9.514   2.520  8.00  0.00           P  
ATOM   2024  C5' DCP A  64     -15.004 -10.384   0.100  1.00  0.00           C  
ATOM   2025  O5' DCP A  64     -14.839  -9.348   0.940  6.00  0.00           O  
ATOM   2026  C4' DCP A  64     -15.037  -9.926  -1.330  2.00  0.00           C  
ATOM   2027  O4' DCP A  64     -16.001  -8.979  -1.640  3.00  0.00           O  
ATOM   2028  C3' DCP A  64     -13.776  -9.146  -1.790  4.00  0.00           C  
ATOM   2029  O3' DCP A  64     -12.666  -9.986  -1.870  8.00  0.00           O  
ATOM   2030  C2' DCP A  64     -14.255  -8.545  -3.120  9.00  0.00           C  
ATOM   2031  C1' DCP A  64     -15.731  -8.323  -2.880  1.00  0.00           C  
ATOM   2032  N1  DCP A  64     -16.191  -6.936  -2.580  9.00  0.00           N  
ATOM   2033  C2  DCP A  64     -17.167  -6.404  -3.370  5.00  0.00           C  
ATOM   2034  O2  DCP A  64     -17.707  -7.012  -4.290  0.00  0.00           O  
ATOM   2035  N3  DCP A  64     -17.594  -5.159  -3.090  7.00  0.00           N  
ATOM   2036  C4  DCP A  64     -17.128  -4.432  -2.020  3.00  0.00           C  
ATOM   2037  N4  DCP A  64     -17.604  -3.227  -1.780  1.00  0.00           N  
ATOM   2038  C5  DCP A  64     -16.116  -4.931  -1.150  5.00  0.00           C  
ATOM   2039  C6  DCP A  64     -15.642  -6.152  -1.520  0.00  0.00           C  
ATOM   2040  OP1 DCP A  64     -14.556 -10.730   3.080  3.00  0.00           O  
ATOM   2041  OP2 DCP A  64     -14.822  -8.220   3.170  0.00  0.00           O  
ATOM   2042  H3  DCP A  64     -18.245  -4.710  -3.800  8.00  0.00           H  
ATOM   2043  H5  DCP A  64     -15.680  -4.409  -0.260  1.00  0.00           H  
ATOM   2044  H6  DCP A  64     -14.749  -6.644  -1.010  8.00  0.00           H  
ATOM   2045  H1' DCP A  64     -16.129  -8.721  -3.770  8.00  0.00           H  
ATOM   2046  H2' DCP A  64     -13.664  -7.654  -3.400  3.00  0.00           H  
ATOM   2047  H3' DCP A  64     -13.530  -8.514  -0.980  3.00  0.00           H  
ATOM   2048  H4' DCP A  64     -15.165 -10.711  -1.970  0.00  0.00           H  
ATOM   2049  H41 DCP A  64     -18.164  -2.826  -2.450  6.00  0.00           H  
ATOM   2050  H5' DCP A  64     -16.055 -10.775   0.340  2.00  0.00           H  
ATOM   2051  H42 DCP A  64     -17.160  -2.664  -1.050  7.00  0.00           H  
ATOM   2052 H2'' DCP A  64     -14.211  -9.378  -3.920  8.00  0.00           H  
ATOM   2053 H5'' DCP A  64     -14.248 -11.168   0.220  2.00  0.00           H  
ATOM   2054  P   DCP A  65     -11.190  -9.448  -2.170  4.00  0.00           P  
ATOM   2055  C5' DCP A  65     -11.199 -10.270  -4.720  9.00  0.00           C  
ATOM   2056  O5' DCP A  65     -11.005  -9.189  -3.770  0.00  0.00           O  
ATOM   2057  C4' DCP A  65     -11.061  -9.870  -6.190  6.00  0.00           C  
ATOM   2058  O4' DCP A  65     -12.005  -8.802  -6.440  5.00  0.00           O  
ATOM   2059  C3' DCP A  65      -9.628  -9.496  -6.510  3.00  0.00           C  
ATOM   2060  O3' DCP A  65      -9.070 -10.499  -7.280  3.00  0.00           O  
ATOM   2061  C2' DCP A  65      -9.895  -8.253  -7.420  3.00  0.00           C  
ATOM   2062  C1' DCP A  65     -11.383  -7.830  -7.280  3.00  0.00           C  
ATOM   2063  N1  DCP A  65     -11.468  -6.542  -6.570  0.00  0.00           N  
ATOM   2064  C2  DCP A  65     -12.141  -5.513  -7.130  8.00  0.00           C  
ATOM   2065  O2  DCP A  65     -12.709  -5.686  -8.230  6.00  0.00           O  
ATOM   2066  N3  DCP A  65     -12.007  -4.217  -6.610  9.00  0.00           N  
ATOM   2067  C4  DCP A  65     -11.223  -4.041  -5.520  7.00  0.00           C  
ATOM   2068  N4  DCP A  65     -10.985  -2.903  -5.040  8.00  0.00           N  
ATOM   2069  C5  DCP A  65     -10.710  -5.120  -4.770  5.00  0.00           C  
ATOM   2070  C6  DCP A  65     -10.747  -6.346  -5.380  2.00  0.00           C  
ATOM   2071  OP1 DCP A  65     -10.229 -10.526  -1.810  2.00  0.00           O  
ATOM   2072  OP2 DCP A  65     -11.109  -8.146  -1.500  5.00  0.00           O  
ATOM   2073  H3  DCP A  65     -12.408  -3.441  -7.090  9.00  0.00           H  
ATOM   2074  H5  DCP A  65     -10.076  -5.019  -3.920  5.00  0.00           H  
ATOM   2075  H6  DCP A  65     -10.266  -7.231  -4.970  5.00  0.00           H  
ATOM   2076  H1' DCP A  65     -11.869  -7.813  -8.350  1.00  0.00           H  
ATOM   2077  H2' DCP A  65      -9.247  -7.350  -7.280  3.00  0.00           H  
ATOM   2078  H3' DCP A  65      -8.951  -9.131  -5.710  0.00  0.00           H  
ATOM   2079  H4' DCP A  65     -11.252 -10.832  -6.820  3.00  0.00           H  
ATOM   2080  H41 DCP A  65     -11.416  -2.065  -5.450  4.00  0.00           H  
ATOM   2081  H5' DCP A  65     -12.234 -10.569  -4.550  7.00  0.00           H  
ATOM   2082  H42 DCP A  65     -10.266  -2.702  -4.360  0.00  0.00           H  
ATOM   2083 H2'' DCP A  65      -9.808  -8.570  -8.490  4.00  0.00           H  
ATOM   2084 H5'' DCP A  65     -10.413 -11.061  -4.530  5.00  0.00           H  
ATOM   2085  P   DCP A  66      -7.514 -10.637  -7.670  9.00  0.00           P  
ATOM   2086  C5' DCP A  66      -8.171 -10.564 -10.200  6.00  0.00           C  
ATOM   2087  O5' DCP A  66      -7.308 -10.151  -9.200  1.00  0.00           O  
ATOM   2088  C4' DCP A  66      -8.046  -9.722 -11.470  2.00  0.00           C  
ATOM   2089  O4' DCP A  66      -8.340  -8.386 -11.100  7.00  0.00           O  
ATOM   2090  C3' DCP A  66      -6.703  -9.823 -12.150  9.00  0.00           C  
ATOM   2091  O3' DCP A  66      -6.815 -10.215 -13.500  0.00  0.00           O  
ATOM   2092  C2' DCP A  66      -6.311  -8.407 -12.280  8.00  0.00           C  
ATOM   2093  C1' DCP A  66      -7.579  -7.632 -12.060  1.00  0.00           C  
ATOM   2094  N1  DCP A  66      -7.425  -6.166 -11.580  6.00  0.00           N  
ATOM   2095  C2  DCP A  66      -8.116  -5.093 -12.190  6.00  0.00           C  
ATOM   2096  O2  DCP A  66      -8.869  -5.246 -13.160  8.00  0.00           O  
ATOM   2097  N3  DCP A  66      -8.051  -3.836 -11.700  2.00  0.00           N  
ATOM   2098  C4  DCP A  66      -7.289  -3.586 -10.710  3.00  0.00           C  
ATOM   2099  N4  DCP A  66      -7.237  -2.336 -10.290  9.00  0.00           N  
ATOM   2100  C5  DCP A  66      -6.678  -4.682  -9.980  9.00  0.00           C  
ATOM   2101  C6  DCP A  66      -6.740  -5.931 -10.440  6.00  0.00           C  
ATOM   2102  OP1 DCP A  66      -7.130 -12.051  -7.660  9.00  0.00           O  
ATOM   2103  OP2 DCP A  66      -6.660  -9.742  -6.850  7.00  0.00           O  
ATOM   2104  H3  DCP A  66      -8.470  -3.175 -12.210  0.00  0.00           H  
ATOM   2105  H5  DCP A  66      -6.050  -4.519  -9.090  2.00  0.00           H  
ATOM   2106  H6  DCP A  66      -6.229  -6.731 -10.010  7.00  0.00           H  
ATOM   2107  H1' DCP A  66      -8.107  -7.623 -13.030  2.00  0.00           H  
ATOM   2108  H2' DCP A  66      -5.582  -8.204 -11.490  2.00  0.00           H  
ATOM   2109  H3' DCP A  66      -5.887 -10.444 -11.720  9.00  0.00           H  
ATOM   2110  H4' DCP A  66      -8.775 -10.016 -12.250  2.00  0.00           H  
ATOM   2111  H41 DCP A  66      -7.639  -1.505 -10.820  3.00  0.00           H  
ATOM   2112  H5' DCP A  66      -9.197 -10.436  -9.830  3.00  0.00           H  
ATOM   2113  H42 DCP A  66      -6.618  -2.087  -9.430  5.00  0.00           H  
ATOM   2114 H2'' DCP A  66      -5.894  -8.102 -13.250  7.00  0.00           H  
ATOM   2115 H5'' DCP A  66      -8.029 -11.604 -10.380  7.00  0.00           H  
ATOM   2116  P    DT A  67      -6.896 -11.723 -13.970  3.00  0.00           P  
ATOM   2117  C5'  DT A  67      -8.516 -11.238 -15.990  3.00  0.00           C  
ATOM   2118  O5'  DT A  67      -7.208 -11.514 -15.600  9.00  0.00           O  
ATOM   2119  C4'  DT A  67      -8.560 -10.370 -17.250  4.00  0.00           C  
ATOM   2120  O4'  DT A  67      -7.763  -9.172 -17.160  5.00  0.00           O  
ATOM   2121  C3'  DT A  67      -7.915 -11.099 -18.480  0.00  0.00           C  
ATOM   2122  O3'  DT A  67      -8.566 -10.591 -19.610  9.00  0.00           O  
ATOM   2123  C2'  DT A  67      -6.440 -10.736 -18.420  8.00  0.00           C  
ATOM   2124  C1'  DT A  67      -6.647  -9.259 -18.040  3.00  0.00           C  
ATOM   2125  N1   DT A  67      -5.499  -8.570 -17.460  8.00  0.00           N  
ATOM   2126  C2   DT A  67      -5.036  -7.380 -18.060  3.00  0.00           C  
ATOM   2127  O2   DT A  67      -5.572  -6.838 -19.000  8.00  0.00           O  
ATOM   2128  N3   DT A  67      -4.063  -6.643 -17.500  5.00  0.00           N  
ATOM   2129  C4   DT A  67      -3.361  -7.055 -16.360  1.00  0.00           C  
ATOM   2130  O4   DT A  67      -2.611  -6.228 -15.800  8.00  0.00           O  
ATOM   2131  C5   DT A  67      -3.751  -8.338 -15.820  9.00  0.00           C  
ATOM   2132  C6   DT A  67      -4.762  -9.104 -16.450  1.00  0.00           C  
ATOM   2133  C7   DT A  67      -3.053  -8.815 -14.610  0.00  0.00           C  
ATOM   2134  OP1  DT A  67      -8.110 -12.286 -13.270  6.00  0.00           O  
ATOM   2135  OP2  DT A  67      -5.575 -12.333 -13.850  2.00  0.00           O1-
ATOM   2136  H3   DT A  67      -3.821  -5.717 -17.860  9.00  0.00           H  
ATOM   2137  H6   DT A  67      -5.152  -9.981 -15.920  7.00  0.00           H  
ATOM   2138  H1'  DT A  67      -6.878  -8.772 -18.970  4.00  0.00           H  
ATOM   2139  H2'  DT A  67      -5.823 -11.290 -17.640  3.00  0.00           H  
ATOM   2140  H3'  DT A  67      -8.114 -12.128 -18.360  0.00  0.00           H  
ATOM   2141  H4'  DT A  67      -9.599 -10.122 -17.390  1.00  0.00           H  
ATOM   2142  H5'  DT A  67      -9.006 -10.660 -15.240  9.00  0.00           H  
ATOM   2143  H71  DT A  67      -3.634  -9.651 -14.170  2.00  0.00           H  
ATOM   2144  H72  DT A  67      -3.038  -8.013 -13.860  8.00  0.00           H  
ATOM   2145  H73  DT A  67      -2.101  -9.083 -14.940  5.00  0.00           H  
ATOM   2146 H2''  DT A  67      -5.960 -10.721 -19.430  0.00  0.00           H  
ATOM   2147 H5''  DT A  67      -9.135 -12.122 -16.080  4.00  0.00           H  
ATOM   2148  P    DA A  68      -8.194 -11.208 -21.090  6.00  0.00           P  
ATOM   2149  C5'  DA A  68      -7.527  -8.731 -22.010  5.00  0.00           C  
ATOM   2150  O5'  DA A  68      -7.096 -10.097 -21.730  0.00  0.00           O  
ATOM   2151  C4'  DA A  68      -6.520  -7.816 -22.600  9.00  0.00           C  
ATOM   2152  O4'  DA A  68      -5.516  -7.645 -21.660  1.00  0.00           O  
ATOM   2153  C3'  DA A  68      -5.964  -8.179 -23.970  0.00  0.00           C  
ATOM   2154  O3'  DA A  68      -5.579  -7.153 -24.870  5.00  0.00           O  
ATOM   2155  C2'  DA A  68      -4.688  -8.842 -23.410  9.00  0.00           C  
ATOM   2156  C1'  DA A  68      -4.349  -8.032 -22.200  6.00  0.00           C  
ATOM   2157  N1   DA A  68      -0.836  -7.356 -18.540  2.00  0.00           N  
ATOM   2158  C2   DA A  68      -1.265  -6.536 -19.500  6.00  0.00           C  
ATOM   2159  N3   DA A  68      -2.198  -6.794 -20.360  7.00  0.00           N  
ATOM   2160  C4   DA A  68      -2.529  -8.115 -20.360  1.00  0.00           C  
ATOM   2161  C5   DA A  68      -2.152  -9.115 -19.540  5.00  0.00           C  
ATOM   2162  C6   DA A  68      -1.258  -8.646 -18.590  9.00  0.00           C  
ATOM   2163  N6   DA A  68      -0.736  -9.419 -17.690  2.00  0.00           N  
ATOM   2164  N7   DA A  68      -2.761 -10.325 -19.800  3.00  0.00           N  
ATOM   2165  C8   DA A  68      -3.573 -10.019 -20.760  6.00  0.00           C  
ATOM   2166  N9   DA A  68      -3.531  -8.724 -21.170  6.00  0.00           N  
ATOM   2167  OP1  DA A  68      -9.446 -11.204 -21.860  2.00  0.00           O  
ATOM   2168  OP2  DA A  68      -7.464 -12.528 -20.870  7.00  0.00           O1-
ATOM   2169  H2   DA A  68      -0.818  -5.612 -19.510  8.00  0.00           H  
ATOM   2170  H8   DA A  68      -4.233 -10.790 -21.280  1.00  0.00           H  
ATOM   2171  H1'  DA A  68      -3.870  -7.084 -22.460  6.00  0.00           H  
ATOM   2172  H2'  DA A  68      -4.898  -9.882 -23.140  2.00  0.00           H  
ATOM   2173  H3'  DA A  68      -6.519  -8.925 -24.570  3.00  0.00           H  
ATOM   2174  H4'  DA A  68      -7.044  -6.862 -22.690  5.00  0.00           H  
ATOM   2175  H5'  DA A  68      -8.010  -8.298 -21.100  3.00  0.00           H  
ATOM   2176  H61  DA A  68      -0.232  -8.973 -16.870  0.00  0.00           H  
ATOM   2177  H62  DA A  68      -1.106 -10.345 -17.600  3.00  0.00           H  
ATOM   2178 H2''  DA A  68      -3.927  -8.745 -24.180  3.00  0.00           H  
ATOM   2179 H5''  DA A  68      -8.261  -8.747 -22.720  9.00  0.00           H  
ATOM   2180  P    DA A  69      -6.492  -6.955 -26.230  9.00  0.00           P  
ATOM   2181  C5'  DA A  69      -8.556  -5.279 -25.480  9.00  0.00           C  
ATOM   2182  O5'  DA A  69      -8.024  -6.604 -25.660  9.00  0.00           O  
ATOM   2183  C4'  DA A  69     -10.024  -5.274 -24.970  8.00  0.00           C  
ATOM   2184  O4'  DA A  69     -10.833  -5.859 -25.930  4.00  0.00           O  
ATOM   2185  C3'  DA A  69     -10.172  -6.025 -23.630  2.00  0.00           C  
ATOM   2186  O3'  DA A  69     -11.069  -5.335 -22.760  3.00  0.00           O  
ATOM   2187  C2'  DA A  69     -10.737  -7.351 -24.040  8.00  0.00           C  
ATOM   2188  C1'  DA A  69     -11.565  -6.958 -25.300  7.00  0.00           C  
ATOM   2189  N1   DA A  69     -14.866  -9.251 -28.310  3.00  0.00           N  
ATOM   2190  C2   DA A  69     -15.008  -8.447 -27.270  9.00  0.00           C  
ATOM   2191  N3   DA A  69     -14.112  -7.819 -26.590  9.00  0.00           N  
ATOM   2192  C4   DA A  69     -12.871  -8.309 -26.950  1.00  0.00           C  
ATOM   2193  C5   DA A  69     -12.511  -9.237 -27.940  6.00  0.00           C  
ATOM   2194  C6   DA A  69     -13.658  -9.698 -28.630  6.00  0.00           C  
ATOM   2195  N6   DA A  69     -13.676 -10.627 -29.570  5.00  0.00           N  
ATOM   2196  N7   DA A  69     -11.117  -9.323 -28.060  8.00  0.00           N  
ATOM   2197  C8   DA A  69     -10.676  -8.636 -27.030  8.00  0.00           C  
ATOM   2198  N9   DA A  69     -11.659  -7.918 -26.400  3.00  0.00           N  
ATOM   2199  OP1  DA A  69      -6.628  -8.241 -26.990  7.00  0.00           O  
ATOM   2200  OP2  DA A  69      -5.947  -5.790 -26.920  7.00  0.00           O1-
ATOM   2201  H2   DA A  69     -16.017  -8.143 -27.190  7.00  0.00           H  
ATOM   2202  H8   DA A  69      -9.623  -8.464 -26.890  6.00  0.00           H  
ATOM   2203  H1'  DA A  69     -12.563  -6.563 -25.020  5.00  0.00           H  
ATOM   2204  H2'  DA A  69      -9.939  -8.108 -24.280  3.00  0.00           H  
ATOM   2205  H3'  DA A  69      -9.153  -6.137 -23.200  1.00  0.00           H  
ATOM   2206  H4'  DA A  69     -10.375  -4.224 -24.860  9.00  0.00           H  
ATOM   2207  H5'  DA A  69      -8.610  -4.626 -26.340  8.00  0.00           H  
ATOM   2208  H61  DA A  69     -14.458 -10.841 -30.160  3.00  0.00           H  
ATOM   2209  H62  DA A  69     -12.854 -11.235 -29.710  2.00  0.00           H  
ATOM   2210 H2''  DA A  69     -11.419  -7.696 -23.260  2.00  0.00           H  
ATOM   2211 H5''  DA A  69      -7.949  -4.761 -24.800  7.00  0.00           H  
ATOM   2212  P    DC A  70     -10.708  -4.698 -21.360  0.00  0.00           P  
ATOM   2213  C5'  DC A  70     -10.661  -7.036 -20.130  0.00  0.00           C  
ATOM   2214  O5'  DC A  70     -11.252  -5.735 -20.260  4.00  0.00           O  
ATOM   2215  C4'  DC A  70      -9.949  -7.190 -18.730  2.00  0.00           C  
ATOM   2216  O4'  DC A  70      -8.927  -6.300 -18.560  2.00  0.00           O  
ATOM   2217  C3'  DC A  70     -10.826  -7.005 -17.520  4.00  0.00           C  
ATOM   2218  O3'  DC A  70     -11.547  -8.190 -17.370  9.00  0.00           O  
ATOM   2219  C2'  DC A  70      -9.865  -6.683 -16.380  0.00  0.00           C  
ATOM   2220  C1'  DC A  70      -8.635  -6.082 -17.120  5.00  0.00           C  
ATOM   2221  N1   DC A  70      -8.485  -4.614 -16.840  1.00  0.00           N  
ATOM   2222  C2   DC A  70      -7.498  -4.182 -15.930  7.00  0.00           C  
ATOM   2223  O2   DC A  70      -6.802  -4.914 -15.240  8.00  0.00           O  
ATOM   2224  N3   DC A  70      -7.179  -2.862 -15.820  1.00  0.00           N  
ATOM   2225  C4   DC A  70      -7.957  -2.040 -16.450  6.00  0.00           C  
ATOM   2226  N4   DC A  70      -7.635  -0.846 -16.180  6.00  0.00           N  
ATOM   2227  C5   DC A  70      -9.000  -2.364 -17.300  0.00  0.00           C  
ATOM   2228  C6   DC A  70      -9.249  -3.667 -17.470  1.00  0.00           C  
ATOM   2229  OP1  DC A  70     -11.490  -3.411 -21.380  0.00  0.00           O  
ATOM   2230  OP2  DC A  70      -9.229  -4.715 -21.150  3.00  0.00           O1-
ATOM   2231  H5   DC A  70      -9.513  -1.581 -17.730  0.00  0.00           H  
ATOM   2232  H6   DC A  70      -9.882  -4.070 -18.180  0.00  0.00           H  
ATOM   2233  H1'  DC A  70      -7.672  -6.656 -16.830  8.00  0.00           H  
ATOM   2234  H2'  DC A  70     -10.313  -5.985 -15.590  7.00  0.00           H  
ATOM   2235  H3'  DC A  70     -11.414  -6.078 -17.770  7.00  0.00           H  
ATOM   2236  H4'  DC A  70      -9.398  -8.166 -18.770  3.00  0.00           H  
ATOM   2237  H41  DC A  70      -7.025  -0.622 -15.430  8.00  0.00           H  
ATOM   2238  H5'  DC A  70      -9.981  -7.101 -21.000  2.00  0.00           H  
ATOM   2239  H42  DC A  70      -7.911  -0.116 -16.810  1.00  0.00           H  
ATOM   2240 H2''  DC A  70      -9.497  -7.572 -15.950  3.00  0.00           H  
ATOM   2241 H5''  DC A  70     -11.384  -7.810 -20.230  8.00  0.00           H  
ATOM   2242  P    DC A  71     -12.933  -8.170 -16.600  7.00  0.00           P  
ATOM   2243  C5'  DC A  71     -11.698  -9.200 -14.490  0.00  0.00           C  
ATOM   2244  O5'  DC A  71     -12.543  -8.126 -15.020  3.00  0.00           O  
ATOM   2245  C4'  DC A  71     -11.412  -8.975 -13.020  9.00  0.00           C  
ATOM   2246  O4'  DC A  71     -10.883  -7.652 -12.840  0.00  0.00           O  
ATOM   2247  C3'  DC A  71     -12.714  -8.907 -12.240  2.00  0.00           C  
ATOM   2248  O3'  DC A  71     -13.184 -10.119 -11.670  7.00  0.00           O  
ATOM   2249  C2'  DC A  71     -12.326  -8.047 -11.070  1.00  0.00           C  
ATOM   2250  C1'  DC A  71     -11.181  -7.131 -11.520  4.00  0.00           C  
ATOM   2251  N1   DC A  71     -11.594  -5.733 -11.570  7.00  0.00           N  
ATOM   2252  C2   DC A  71     -11.037  -4.864 -10.650  3.00  0.00           C  
ATOM   2253  O2   DC A  71     -10.023  -5.170  -9.980  9.00  0.00           O  
ATOM   2254  N3   DC A  71     -11.281  -3.541 -10.570  8.00  0.00           N  
ATOM   2255  C4   DC A  71     -12.101  -3.053 -11.540  4.00  0.00           C  
ATOM   2256  N4   DC A  71     -12.324  -1.736 -11.400  2.00  0.00           N  
ATOM   2257  C5   DC A  71     -12.714  -3.909 -12.520  7.00  0.00           C  
ATOM   2258  C6   DC A  71     -12.469  -5.195 -12.530  1.00  0.00           C  
ATOM   2259  OP1  DC A  71     -13.563  -9.453 -16.940  7.00  0.00           O  
ATOM   2260  OP2  DC A  71     -13.632  -6.920 -16.960  2.00  0.00           O1-
ATOM   2261  H5   DC A  71     -13.346  -3.516 -13.220  1.00  0.00           H  
ATOM   2262  H6   DC A  71     -12.901  -5.809 -13.300  5.00  0.00           H  
ATOM   2263  H1'  DC A  71     -10.367  -7.142 -10.780  9.00  0.00           H  
ATOM   2264  H2'  DC A  71     -13.224  -7.546 -10.760  2.00  0.00           H  
ATOM   2265  H3'  DC A  71     -13.528  -8.378 -12.730  7.00  0.00           H  
ATOM   2266  H4'  DC A  71     -10.771  -9.740 -12.730  1.00  0.00           H  
ATOM   2267  H41  DC A  71     -11.692  -1.310 -10.690  7.00  0.00           H  
ATOM   2268  H5'  DC A  71     -10.800  -9.293 -15.080  5.00  0.00           H  
ATOM   2269  H42  DC A  71     -12.857  -1.219 -12.100  5.00  0.00           H  
ATOM   2270 H2''  DC A  71     -11.963  -8.620 -10.210  1.00  0.00           H  
ATOM   2271 H5''  DC A  71     -12.305 -10.109 -14.580  0.00  0.00           H  
ATOM   2272  P    DC A  72     -14.757 -10.369 -11.270  5.00  0.00           P  
ATOM   2273  C5'  DC A  72     -14.301 -10.208  -8.770  3.00  0.00           C  
ATOM   2274  O5'  DC A  72     -15.078  -9.786  -9.880  0.00  0.00           O  
ATOM   2275  C4'  DC A  72     -14.747  -9.482  -7.460  5.00  0.00           C  
ATOM   2276  O4'  DC A  72     -14.764  -8.012  -7.510  3.00  0.00           O  
ATOM   2277  C3'  DC A  72     -16.156  -9.913  -7.100  7.00  0.00           C  
ATOM   2278  O3'  DC A  72     -16.319 -10.285  -5.760  6.00  0.00           O  
ATOM   2279  C2'  DC A  72     -16.988  -8.603  -7.270  3.00  0.00           C  
ATOM   2280  C1'  DC A  72     -15.904  -7.667  -6.790  3.00  0.00           C  
ATOM   2281  N1   DC A  72     -16.131  -6.159  -6.920  5.00  0.00           N  
ATOM   2282  C2   DC A  72     -15.586  -5.202  -6.050  3.00  0.00           C  
ATOM   2283  O2   DC A  72     -14.782  -5.584  -5.190  7.00  0.00           O  
ATOM   2284  N3   DC A  72     -15.869  -3.916  -6.120  5.00  0.00           N  
ATOM   2285  C4   DC A  72     -16.715  -3.525  -7.050  9.00  0.00           C  
ATOM   2286  N4   DC A  72     -16.960  -2.243  -7.130  7.00  0.00           N  
ATOM   2287  C5   DC A  72     -17.281  -4.369  -8.020  6.00  0.00           C  
ATOM   2288  C6   DC A  72     -16.925  -5.668  -7.960  3.00  0.00           C  
ATOM   2289  OP1  DC A  72     -14.863 -11.887 -11.230  3.00  0.00           O  
ATOM   2290  OP2  DC A  72     -15.614  -9.687 -12.240  8.00  0.00           O1-
ATOM   2291  H5   DC A  72     -17.922  -3.905  -8.730  6.00  0.00           H  
ATOM   2292  H6   DC A  72     -17.253  -6.344  -8.800  1.00  0.00           H  
ATOM   2293  H1'  DC A  72     -15.681  -7.869  -5.780  6.00  0.00           H  
ATOM   2294  H2'  DC A  72     -17.209  -8.504  -8.370  6.00  0.00           H  
ATOM   2295  H3'  DC A  72     -16.661 -10.657  -7.750  4.00  0.00           H  
ATOM   2296  H4'  DC A  72     -14.059  -9.773  -6.660  6.00  0.00           H  
ATOM   2297  H41  DC A  72     -16.419  -1.590  -6.600  8.00  0.00           H  
ATOM   2298  H5'  DC A  72     -13.272 -10.018  -9.030  9.00  0.00           H  
ATOM   2299  H42  DC A  72     -17.440  -1.919  -7.940  6.00  0.00           H  
ATOM   2300 H2''  DC A  72     -17.771  -8.582  -6.520  7.00  0.00           H  
ATOM   2301 H5''  DC A  72     -14.401 -11.291  -8.650  4.00  0.00           H  
ATOM   2302  P    DT A  73     -16.261 -11.747  -5.290  3.00  0.00           P  
ATOM   2303  C5'  DT A  73     -18.644 -12.557  -6.450  0.00  0.00           C  
ATOM   2304  O5'  DT A  73     -17.866 -12.180  -5.230  9.00  0.00           O  
ATOM   2305  C4'  DT A  73     -19.809 -13.447  -6.020  1.00  0.00           C  
ATOM   2306  O4'  DT A  73     -19.369 -14.655  -5.420  6.00  0.00           O  
ATOM   2307  C3'  DT A  73     -20.823 -12.660  -5.150  3.00  0.00           C  
ATOM   2308  O3'  DT A  73     -22.174 -13.124  -5.460  5.00  0.00           O  
ATOM   2309  C2'  DT A  73     -20.399 -13.264  -3.830  6.00  0.00           C  
ATOM   2310  C1'  DT A  73     -20.025 -14.712  -4.160  0.00  0.00           C  
ATOM   2311  N1   DT A  73     -19.169 -15.299  -3.090  8.00  0.00           N  
ATOM   2312  C2   DT A  73     -19.846 -16.292  -2.360  4.00  0.00           C  
ATOM   2313  O2   DT A  73     -20.995 -16.712  -2.600  4.00  0.00           O  
ATOM   2314  N3   DT A  73     -19.088 -16.883  -1.380  7.00  0.00           N  
ATOM   2315  C4   DT A  73     -17.674 -16.798  -1.330  8.00  0.00           C  
ATOM   2316  O4   DT A  73     -17.116 -17.473  -0.460  1.00  0.00           O  
ATOM   2317  C5   DT A  73     -17.110 -15.674  -2.100  2.00  0.00           C  
ATOM   2318  C6   DT A  73     -17.837 -14.959  -3.000  1.00  0.00           C  
ATOM   2319  C7   DT A  73     -15.727 -15.098  -1.850  6.00  0.00           C  
ATOM   2320  OP1  DT A  73     -15.844 -11.765  -3.870  0.00  0.00           O  
ATOM   2321  OP2  DT A  73     -15.603 -12.580  -6.330  9.00  0.00           O1-
ATOM   2322  H3   DT A  73     -19.382 -17.547  -0.680  5.00  0.00           H  
ATOM   2323  H6   DT A  73     -17.536 -14.125  -3.600  0.00  0.00           H  
ATOM   2324  H1'  DT A  73     -21.035 -15.223  -4.280  0.00  0.00           H  
ATOM   2325  H2'  DT A  73     -19.566 -12.705  -3.490  4.00  0.00           H  
ATOM   2326  H3'  DT A  73     -20.745 -11.528  -5.190  5.00  0.00           H  
ATOM   2327  H4'  DT A  73     -20.201 -13.811  -6.940  0.00  0.00           H  
ATOM   2328  H5'  DT A  73     -18.063 -13.236  -7.110  2.00  0.00           H  
ATOM   2329  H71  DT A  73     -15.606 -14.928  -0.800  2.00  0.00           H  
ATOM   2330  H72  DT A  73     -14.993 -15.853  -2.060  2.00  0.00           H  
ATOM   2331  H73  DT A  73     -15.396 -14.389  -2.600  7.00  0.00           H  
ATOM   2332 H2''  DT A  73     -21.228 -13.194  -3.110  0.00  0.00           H  
ATOM   2333 H5''  DT A  73     -18.888 -11.734  -7.070  0.00  0.00           H  
ATOM   2334  P    DA A  74     -22.878 -12.626  -6.790  7.00  0.00           P  
ATOM   2335  C5'  DA A  74     -24.670 -10.851  -7.110  4.00  0.00           C  
ATOM   2336  O5'  DA A  74     -23.599 -11.345  -6.310  2.00  0.00           O  
ATOM   2337  C4'  DA A  74     -25.412  -9.636  -6.610  1.00  0.00           C  
ATOM   2338  O4'  DA A  74     -25.927  -9.699  -5.370  1.00  0.00           O  
ATOM   2339  C3'  DA A  74     -24.551  -8.388  -6.700  0.00  0.00           C  
ATOM   2340  O3'  DA A  74     -24.319  -7.822  -7.990  2.00  0.00           O  
ATOM   2341  C2'  DA A  74     -25.389  -7.548  -5.800  2.00  0.00           C  
ATOM   2342  C1'  DA A  74     -25.950  -8.514  -4.670  2.00  0.00           C  
ATOM   2343  N1   DA A  74     -25.676  -7.925   0.400  4.00  0.00           N  
ATOM   2344  C2   DA A  74     -26.594  -7.511  -0.470  4.00  0.00           C  
ATOM   2345  N3   DA A  74     -26.597  -7.792  -1.750  2.00  0.00           N  
ATOM   2346  C4   DA A  74     -25.441  -8.432  -2.170  5.00  0.00           C  
ATOM   2347  C5   DA A  74     -24.393  -8.865  -1.390  5.00  0.00           C  
ATOM   2348  C6   DA A  74     -24.580  -8.618  -0.010  8.00  0.00           C  
ATOM   2349  N6   DA A  74     -23.758  -9.020   0.940  1.00  0.00           N  
ATOM   2350  N7   DA A  74     -23.332  -9.473  -2.150  6.00  0.00           N  
ATOM   2351  C8   DA A  74     -23.774  -9.221  -3.360  4.00  0.00           C  
ATOM   2352  N9   DA A  74     -25.053  -8.715  -3.450  9.00  0.00           N  
ATOM   2353  OP1  DA A  74     -23.842 -13.665  -7.130  8.00  0.00           O  
ATOM   2354  OP2  DA A  74     -21.895 -12.166  -7.840  0.00  0.00           O1-
ATOM   2355  H2   DA A  74     -27.455  -6.980  -0.060  5.00  0.00           H  
ATOM   2356  H8   DA A  74     -23.226  -9.676  -4.160  9.00  0.00           H  
ATOM   2357  H1'  DA A  74     -26.931  -8.232  -4.450  0.00  0.00           H  
ATOM   2358  H2'  DA A  74     -24.712  -6.792  -5.290  3.00  0.00           H  
ATOM   2359  H3'  DA A  74     -23.595  -8.653  -6.160  9.00  0.00           H  
ATOM   2360  H4'  DA A  74     -26.226  -9.544  -7.360  8.00  0.00           H  
ATOM   2361  H5'  DA A  74     -25.456 -11.589  -7.220  5.00  0.00           H  
ATOM   2362  H61  DA A  74     -23.979  -8.729   1.870  7.00  0.00           H  
ATOM   2363  H62  DA A  74     -22.933  -9.434   0.630  8.00  0.00           H  
ATOM   2364 H2''  DA A  74     -26.259  -7.121  -6.300  2.00  0.00           H  
ATOM   2365 H5''  DA A  74     -24.239 -10.554  -8.090  6.00  0.00           H  
ATOM   2366  P    DA A  75     -23.088  -6.757  -8.270  0.00  0.00           P  
ATOM   2367  C5'  DA A  75     -24.771  -4.863  -8.550  2.00  0.00           C  
ATOM   2368  O5'  DA A  75     -23.655  -5.323  -7.760  3.00  0.00           O  
ATOM   2369  C4'  DA A  75     -25.555  -3.612  -8.080  8.00  0.00           C  
ATOM   2370  O4'  DA A  75     -25.997  -3.807  -6.740  2.00  0.00           O  
ATOM   2371  C3'  DA A  75     -24.596  -2.436  -8.010  7.00  0.00           C  
ATOM   2372  O3'  DA A  75     -24.994  -1.467  -8.960  0.00  0.00           O  
ATOM   2373  C2'  DA A  75     -24.755  -1.872  -6.570  7.00  0.00           C  
ATOM   2374  C1'  DA A  75     -25.566  -2.818  -5.830  7.00  0.00           C  
ATOM   2375  N1   DA A  75     -25.793  -4.274  -0.920  0.00  0.00           N  
ATOM   2376  C2   DA A  75     -26.692  -3.628  -1.680  8.00  0.00           C  
ATOM   2377  N3   DA A  75     -26.609  -3.368  -3.030  1.00  0.00           N  
ATOM   2378  C4   DA A  75     -25.325  -3.688  -3.490  8.00  0.00           C  
ATOM   2379  C5   DA A  75     -24.316  -4.219  -2.760  3.00  0.00           C  
ATOM   2380  C6   DA A  75     -24.578  -4.489  -1.380  9.00  0.00           C  
ATOM   2381  N6   DA A  75     -23.740  -5.196  -0.670  9.00  0.00           N  
ATOM   2382  N7   DA A  75     -23.193  -4.382  -3.540  5.00  0.00           N  
ATOM   2383  C8   DA A  75     -23.585  -4.056  -4.730  5.00  0.00           C  
ATOM   2384  N9   DA A  75     -24.894  -3.616  -4.770  3.00  0.00           N  
ATOM   2385  OP1  DA A  75     -22.886  -6.653  -9.690  4.00  0.00           O  
ATOM   2386  OP2  DA A  75     -21.901  -7.105  -7.450  7.00  0.00           O1-
ATOM   2387  H2   DA A  75     -27.597  -3.424  -1.150  3.00  0.00           H  
ATOM   2388  H8   DA A  75     -23.001  -4.126  -5.590  8.00  0.00           H  
ATOM   2389  H1'  DA A  75     -26.356  -2.218  -5.380  7.00  0.00           H  
ATOM   2390  H2'  DA A  75     -23.737  -1.727  -6.180  0.00  0.00           H  
ATOM   2391  H3'  DA A  75     -23.551  -2.704  -8.180  9.00  0.00           H  
ATOM   2392  H4'  DA A  75     -26.333  -3.369  -8.700  1.00  0.00           H  
ATOM   2393  H5'  DA A  75     -25.637  -5.506  -8.370  6.00  0.00           H  
ATOM   2394  H61  DA A  75     -23.901  -5.329   0.330  3.00  0.00           H  
ATOM   2395  H62  DA A  75     -22.985  -5.628  -1.230  4.00  0.00           H  
ATOM   2396 H2''  DA A  75     -25.349  -0.936  -6.570  6.00  0.00           H  
ATOM   2397 H5''  DA A  75     -24.556  -4.830  -9.530  1.00  0.00           H  
ATOM   2398  P    DC A  76     -23.822  -0.706  -9.720  4.00  0.00           P  
ATOM   2399  C5'  DC A  76     -22.773   0.749  -7.800  5.00  0.00           C  
ATOM   2400  O5'  DC A  76     -22.620  -0.255  -8.750  1.00  0.00           O  
ATOM   2401  C4'  DC A  76     -21.659   0.928  -6.750  8.00  0.00           C  
ATOM   2402  O4'  DC A  76     -21.745  -0.117  -5.830  4.00  0.00           O  
ATOM   2403  C3'  DC A  76     -20.249   0.888  -7.320  9.00  0.00           C  
ATOM   2404  O3'  DC A  76     -19.883   2.157  -7.970  5.00  0.00           O  
ATOM   2405  C2'  DC A  76     -19.438   0.585  -6.090  6.00  0.00           C  
ATOM   2406  C1'  DC A  76     -20.422  -0.456  -5.450  9.00  0.00           C  
ATOM   2407  N1   DC A  76     -20.055  -1.861  -5.820  5.00  0.00           N  
ATOM   2408  C2   DC A  76     -19.457  -2.652  -4.820  6.00  0.00           C  
ATOM   2409  O2   DC A  76     -18.949  -2.092  -3.800  8.00  0.00           O  
ATOM   2410  N3   DC A  76     -19.271  -4.006  -4.990  1.00  0.00           N  
ATOM   2411  C4   DC A  76     -19.828  -4.534  -5.990  1.00  0.00           C  
ATOM   2412  N4   DC A  76     -19.432  -5.729  -6.220  9.00  0.00           N  
ATOM   2413  C5   DC A  76     -20.494  -3.870  -7.040  1.00  0.00           C  
ATOM   2414  C6   DC A  76     -20.660  -2.537  -6.900  5.00  0.00           C  
ATOM   2415  OP1  DC A  76     -24.345   0.506 -10.400  2.00  0.00           O  
ATOM   2416  OP2  DC A  76     -23.286  -1.742 -10.630  7.00  0.00           O1-
ATOM   2417  H5   DC A  76     -20.956  -4.479  -7.800  6.00  0.00           H  
ATOM   2418  H6   DC A  76     -21.265  -1.950  -7.700  7.00  0.00           H  
ATOM   2419  H1'  DC A  76     -20.438  -0.408  -4.380  3.00  0.00           H  
ATOM   2420  H2'  DC A  76     -18.492   0.167  -6.410  0.00  0.00           H  
ATOM   2421  H3'  DC A  76     -20.103   0.102  -8.060  4.00  0.00           H  
ATOM   2422  H4'  DC A  76     -21.780   1.879  -6.260  0.00  0.00           H  
ATOM   2423  H41  DC A  76     -18.793  -6.146  -5.570  0.00  0.00           H  
ATOM   2424  H5'  DC A  76     -23.791   0.704  -7.310  6.00  0.00           H  
ATOM   2425  H42  DC A  76     -19.904  -6.177  -7.000  8.00  0.00           H  
ATOM   2426 H2''  DC A  76     -19.243   1.507  -5.470  3.00  0.00           H  
ATOM   2427 H5''  DC A  76     -22.787   1.718  -8.350  2.00  0.00           H  
ATOM   2428  P    DC A  77     -18.840   2.223  -9.060  4.00  0.00           P  
ATOM   2429  C5'  DC A  77     -17.024   3.244  -7.430  1.00  0.00           C  
ATOM   2430  O5'  DC A  77     -17.380   2.181  -8.350  0.00  0.00           O  
ATOM   2431  C4'  DC A  77     -15.498   3.333  -7.430  4.00  0.00           C  
ATOM   2432  O4'  DC A  77     -14.986   2.155  -6.770  4.00  0.00           O  
ATOM   2433  C3'  DC A  77     -14.867   3.378  -8.820  2.00  0.00           C  
ATOM   2434  O3'  DC A  77     -14.717   4.648  -9.430  1.00  0.00           O  
ATOM   2435  C2'  DC A  77     -13.491   2.808  -8.510  4.00  0.00           C  
ATOM   2436  C1'  DC A  77     -13.737   1.778  -7.350  9.00  0.00           C  
ATOM   2437  N1   DC A  77     -13.816   0.364  -7.850  7.00  0.00           N  
ATOM   2438  C2   DC A  77     -13.072  -0.629  -7.330  2.00  0.00           C  
ATOM   2439  O2   DC A  77     -12.216  -0.354  -6.420  1.00  0.00           O  
ATOM   2440  N3   DC A  77     -13.113  -1.922  -7.830  9.00  0.00           N  
ATOM   2441  C4   DC A  77     -13.995  -2.189  -8.680  8.00  0.00           C  
ATOM   2442  N4   DC A  77     -14.073  -3.374  -9.200  7.00  0.00           N  
ATOM   2443  C5   DC A  77     -14.861  -1.221  -9.240  8.00  0.00           C  
ATOM   2444  C6   DC A  77     -14.771   0.080  -8.790  9.00  0.00           C  
ATOM   2445  OP1  DC A  77     -18.875   3.627  -9.670  4.00  0.00           O  
ATOM   2446  OP2  DC A  77     -18.964   1.116  -9.960  7.00  0.00           O1-
ATOM   2447  H5   DC A  77     -15.590  -1.485  -9.960  7.00  0.00           H  
ATOM   2448  H6   DC A  77     -15.411   0.835  -9.080  3.00  0.00           H  
ATOM   2449  H1'  DC A  77     -12.991   1.735  -6.520  5.00  0.00           H  
ATOM   2450  H2'  DC A  77     -13.134   2.342  -9.420  7.00  0.00           H  
ATOM   2451  H3'  DC A  77     -15.392   2.842  -9.540  5.00  0.00           H  
ATOM   2452  H4'  DC A  77     -15.241   4.251  -6.940  8.00  0.00           H  
ATOM   2453  H41  DC A  77     -13.408  -4.114  -9.030  9.00  0.00           H  
ATOM   2454  H5'  DC A  77     -17.378   3.040  -6.480  9.00  0.00           H  
ATOM   2455  H42  DC A  77     -14.637  -3.573  -9.980  5.00  0.00           H  
ATOM   2456 H2''  DC A  77     -12.937   3.653  -8.230  8.00  0.00           H  
ATOM   2457 H5''  DC A  77     -17.494   4.174  -7.740  5.00  0.00           H  
ATOM   2458  P    DC A  78     -14.618   4.953 -10.980  6.00  0.00           P  
ATOM   2459  C5'  DC A  78     -12.431   4.528 -12.360  8.00  0.00           C  
ATOM   2460  O5'  DC A  78     -13.444   4.048 -11.400  1.00  0.00           O  
ATOM   2461  C4'  DC A  78     -11.136   3.704 -12.170  7.00  0.00           C  
ATOM   2462  O4'  DC A  78     -11.373   2.302 -12.250  2.00  0.00           O  
ATOM   2463  C3'  DC A  78     -10.133   4.052 -13.250  9.00  0.00           C  
ATOM   2464  O3'  DC A  78      -9.076   4.981 -12.900  1.00  0.00           O  
ATOM   2465  C2'  DC A  78      -9.395   2.742 -13.510  2.00  0.00           C  
ATOM   2466  C1'  DC A  78     -10.151   1.692 -12.590  9.00  0.00           C  
ATOM   2467  N1   DC A  78     -10.224   0.405 -13.180  7.00  0.00           N  
ATOM   2468  C2   DC A  78      -9.301  -0.593 -12.810  5.00  0.00           C  
ATOM   2469  O2   DC A  78      -8.459  -0.472 -11.880  8.00  0.00           O  
ATOM   2470  N3   DC A  78      -9.454  -1.890 -13.270  4.00  0.00           N  
ATOM   2471  C4   DC A  78     -10.377  -2.084 -14.230  4.00  0.00           C  
ATOM   2472  N4   DC A  78     -10.709  -3.311 -14.420  0.00  0.00           N  
ATOM   2473  C5   DC A  78     -11.320  -1.157 -14.650  0.00  0.00           C  
ATOM   2474  C6   DC A  78     -11.163   0.101 -14.160  0.00  0.00           C  
ATOM   2475  OP1  DC A  78     -14.264   6.389 -11.040  7.00  0.00           O  
ATOM   2476  OP2  DC A  78     -15.777   4.497 -11.720  5.00  0.00           O1-
ATOM   2477  H5   DC A  78     -12.011  -1.343 -15.460  8.00  0.00           H  
ATOM   2478  H6   DC A  78     -11.641   0.995 -14.510  0.00  0.00           H  
ATOM   2479  H1'  DC A  78      -9.565   1.688 -11.610  9.00  0.00           H  
ATOM   2480  H2'  DC A  78      -9.434   2.393 -14.540  0.00  0.00           H  
ATOM   2481  H3'  DC A  78     -10.656   4.352 -14.140  9.00  0.00           H  
ATOM   2482  H4'  DC A  78     -10.683   3.968 -11.270  0.00  0.00           H  
ATOM   2483  H41  DC A  78     -10.260  -4.072 -13.930  8.00  0.00           H  
ATOM   2484  H5'  DC A  78     -12.107   5.518 -12.120  1.00  0.00           H  
ATOM   2485  H42  DC A  78     -11.489  -3.431 -15.030  8.00  0.00           H  
ATOM   2486 H2''  DC A  78      -8.308   2.741 -13.190  3.00  0.00           H  
ATOM   2487 H5''  DC A  78     -12.709   4.455 -13.460  6.00  0.00           H  
ATOM   2488  P    DT A  79      -8.722   6.207 -13.860  9.00  0.00           P  
ATOM   2489  C5'  DT A  79      -8.653   8.243 -12.190  8.00  0.00           C  
ATOM   2490  O5'  DT A  79      -8.029   7.207 -12.980  0.00  0.00           O  
ATOM   2491  C4'  DT A  79      -7.683   8.798 -11.170  5.00  0.00           C  
ATOM   2492  O4'  DT A  79      -6.485   9.187 -11.950  1.00  0.00           O  
ATOM   2493  C3'  DT A  79      -8.198  10.066 -10.460  5.00  0.00           C  
ATOM   2494  O3'  DT A  79      -7.538  10.277  -9.200  2.00  0.00           O  
ATOM   2495  C2'  DT A  79      -7.755  11.083 -11.500  9.00  0.00           C  
ATOM   2496  C1'  DT A  79      -6.372  10.574 -11.910  9.00  0.00           C  
ATOM   2497  N1   DT A  79      -5.785  11.128 -13.150  2.00  0.00           N  
ATOM   2498  C2   DT A  79      -4.392  11.359 -13.100  1.00  0.00           C  
ATOM   2499  O2   DT A  79      -3.615  10.842 -12.300  6.00  0.00           O  
ATOM   2500  N3   DT A  79      -3.812  11.933 -14.190  9.00  0.00           N  
ATOM   2501  C4   DT A  79      -4.442  12.268 -15.370  9.00  0.00           C  
ATOM   2502  O4   DT A  79      -3.784  12.788 -16.240  9.00  0.00           O  
ATOM   2503  C5   DT A  79      -5.877  11.903 -15.390  2.00  0.00           C  
ATOM   2504  C6   DT A  79      -6.493  11.384 -14.310  0.00  0.00           C  
ATOM   2505  C7   DT A  79      -6.725  12.207 -16.630  5.00  0.00           C  
ATOM   2506  OP1  DT A  79      -7.679   5.826 -14.850  1.00  0.00           O  
ATOM   2507  OP2  DT A  79      -9.934   6.818 -14.470  7.00  0.00           O1-
ATOM   2508  H3   DT A  79      -2.810  12.107 -14.110  3.00  0.00           H  
ATOM   2509  H6   DT A  79      -7.516  10.970 -14.340  5.00  0.00           H  
ATOM   2510  H1'  DT A  79      -5.701  10.805 -11.080  9.00  0.00           H  
ATOM   2511  H2'  DT A  79      -8.360  11.121 -12.340  7.00  0.00           H  
ATOM   2512  H3'  DT A  79      -9.279  10.076 -10.410  5.00  0.00           H  
ATOM   2513  H4'  DT A  79      -7.403   8.060 -10.440  1.00  0.00           H  
ATOM   2514  H5'  DT A  79      -9.488   7.726 -11.630  2.00  0.00           H  
ATOM   2515  H71  DT A  79      -6.774  13.332 -16.800  7.00  0.00           H  
ATOM   2516  H72  DT A  79      -6.279  11.688 -17.490  4.00  0.00           H  
ATOM   2517  H73  DT A  79      -7.771  11.885 -16.490  4.00  0.00           H  
ATOM   2518 H2''  DT A  79      -7.653  12.034 -10.940  6.00  0.00           H  
ATOM   2519 H5''  DT A  79      -8.933   9.028 -12.900  9.00  0.00           H  
ATOM   2520  P    DA A  80      -7.675  11.589  -8.340  5.00  0.00           P  
ATOM   2521  C5'  DA A  80      -5.220  12.049  -8.840  3.00  0.00           C  
ATOM   2522  O5'  DA A  80      -6.520  12.479  -8.920  3.00  0.00           O  
ATOM   2523  C4'  DA A  80      -4.260  13.088  -9.470  5.00  0.00           C  
ATOM   2524  O4'  DA A  80      -4.505  13.359 -10.860  7.00  0.00           O  
ATOM   2525  C3'  DA A  80      -4.420  14.442  -8.760  7.00  0.00           C  
ATOM   2526  O3'  DA A  80      -3.144  14.966  -8.520  0.00  0.00           O  
ATOM   2527  C2'  DA A  80      -5.058  15.397  -9.700  4.00  0.00           C  
ATOM   2528  C1'  DA A  80      -4.603  14.794 -11.050  1.00  0.00           C  
ATOM   2529  N1   DA A  80      -5.551  16.913 -15.700  7.00  0.00           N  
ATOM   2530  C2   DA A  80      -4.509  17.020 -14.920  6.00  0.00           C  
ATOM   2531  N3   DA A  80      -4.280  16.442 -13.700  6.00  0.00           N  
ATOM   2532  C4   DA A  80      -5.374  15.770 -13.310  6.00  0.00           C  
ATOM   2533  C5   DA A  80      -6.545  15.627 -14.010  1.00  0.00           C  
ATOM   2534  C6   DA A  80      -6.594  16.198 -15.270  8.00  0.00           C  
ATOM   2535  N6   DA A  80      -7.583  16.081 -16.180  4.00  0.00           N  
ATOM   2536  N7   DA A  80      -7.466  14.824 -13.320  7.00  0.00           N  
ATOM   2537  C8   DA A  80      -6.850  14.531 -12.190  5.00  0.00           C  
ATOM   2538  N9   DA A  80      -5.575  15.072 -12.160  1.00  0.00           N  
ATOM   2539  OP1  DA A  80      -7.319  11.400  -6.950  3.00  0.00           O  
ATOM   2540  OP2  DA A  80      -8.938  12.245  -8.730  4.00  0.00           O1-
ATOM   2541  H2   DA A  80      -3.772  17.686 -15.280  6.00  0.00           H  
ATOM   2542  H8   DA A  80      -7.366  13.925 -11.400  3.00  0.00           H  
ATOM   2543  H1'  DA A  80      -3.719  15.281 -11.430  8.00  0.00           H  
ATOM   2544  H2'  DA A  80      -6.088  15.399  -9.440  9.00  0.00           H  
ATOM   2545  H3'  DA A  80      -4.949  14.357  -7.870  4.00  0.00           H  
ATOM   2546  H4'  DA A  80      -3.289  12.743  -9.200  4.00  0.00           H  
ATOM   2547  H5'  DA A  80      -5.108  11.099  -9.340  3.00  0.00           H  
ATOM   2548  H61  DA A  80      -7.389  16.448 -17.020  2.00  0.00           H  
ATOM   2549  H62  DA A  80      -8.292  15.334 -15.930  2.00  0.00           H  
ATOM   2550 H2''  DA A  80      -4.717  16.470  -9.660  6.00  0.00           H  
ATOM   2551 H5''  DA A  80      -4.877  11.922  -7.830  8.00  0.00           H  
ATOM   2552  P    DA A  81      -2.781  16.141  -7.460  1.00  0.00           P  
ATOM   2553  C5'  DA A  81      -2.136  17.783  -9.370  2.00  0.00           C  
ATOM   2554  O5'  DA A  81      -2.878  17.480  -8.210  2.00  0.00           O  
ATOM   2555  C4'  DA A  81      -2.572  19.054 -10.130  5.00  0.00           C  
ATOM   2556  O4'  DA A  81      -3.744  18.577 -10.820  4.00  0.00           O  
ATOM   2557  C3'  DA A  81      -3.127  20.285  -9.290  2.00  0.00           C  
ATOM   2558  O3'  DA A  81      -2.448  21.472  -9.660  7.00  0.00           O  
ATOM   2559  C2'  DA A  81      -4.659  20.271  -9.570  6.00  0.00           C  
ATOM   2560  C1'  DA A  81      -4.582  19.722 -10.980  5.00  0.00           C  
ATOM   2561  N1   DA A  81      -7.800  19.636 -15.050  1.00  0.00           N  
ATOM   2562  C2   DA A  81      -6.649  20.266 -14.860  5.00  0.00           C  
ATOM   2563  N3   DA A  81      -5.905  20.294 -13.750  6.00  0.00           N  
ATOM   2564  C4   DA A  81      -6.462  19.579 -12.710  8.00  0.00           C  
ATOM   2565  C5   DA A  81      -7.689  18.938 -12.740  0.00  0.00           C  
ATOM   2566  C6   DA A  81      -8.298  18.969 -14.040  8.00  0.00           C  
ATOM   2567  N6   DA A  81      -9.399  18.397 -14.340  9.00  0.00           N  
ATOM   2568  N7   DA A  81      -7.889  18.198 -11.550  7.00  0.00           N  
ATOM   2569  C8   DA A  81      -6.825  18.461 -10.810  1.00  0.00           C  
ATOM   2570  N9   DA A  81      -5.927  19.272 -11.460  4.00  0.00           N  
ATOM   2571  OP1  DA A  81      -1.376  15.872  -7.140  7.00  0.00           O  
ATOM   2572  OP2  DA A  81      -3.775  16.155  -6.370  6.00  0.00           O1-
ATOM   2573  H2   DA A  81      -6.216  20.768 -15.690  6.00  0.00           H  
ATOM   2574  H8   DA A  81      -6.646  18.026  -9.840  3.00  0.00           H  
ATOM   2575  H1'  DA A  81      -4.050  20.424 -11.740  9.00  0.00           H  
ATOM   2576  H2'  DA A  81      -5.175  19.563  -8.940  1.00  0.00           H  
ATOM   2577  H3'  DA A  81      -2.987  20.110  -8.150  7.00  0.00           H  
ATOM   2578  H4'  DA A  81      -1.758  19.417 -10.830  9.00  0.00           H  
ATOM   2579  H5'  DA A  81      -2.197  16.901 -10.030  8.00  0.00           H  
ATOM   2580  H61  DA A  81      -9.701  18.467 -15.310  0.00  0.00           H  
ATOM   2581  H62  DA A  81      -9.788  17.606 -13.800  2.00  0.00           H  
ATOM   2582 H2''  DA A  81      -5.209  21.153  -9.450  0.00  0.00           H  
ATOM   2583 H5''  DA A  81      -1.087  17.787  -9.100  0.00  0.00           H  
ATOM   2584  P    DC A  82      -2.559  22.939  -8.960  7.00  0.00           P  
ATOM   2585  C5'  DC A  82      -2.255  24.473 -11.090  4.00  0.00           C  
ATOM   2586  O5'  DC A  82      -3.147  24.007 -10.080  7.00  0.00           O  
ATOM   2587  C4'  DC A  82      -2.820  25.111 -12.380  8.00  0.00           C  
ATOM   2588  O4'  DC A  82      -3.835  24.301 -12.930  2.00  0.00           O  
ATOM   2589  C3'  DC A  82      -3.424  26.502 -12.190  9.00  0.00           C  
ATOM   2590  O3'  DC A  82      -3.338  27.197 -13.420  0.00  0.00           O  
ATOM   2591  C2'  DC A  82      -4.859  26.067 -11.830  3.00  0.00           C  
ATOM   2592  C1'  DC A  82      -5.121  24.952 -12.860  2.00  0.00           C  
ATOM   2593  N1   DC A  82      -6.316  24.155 -12.650  6.00  0.00           N  
ATOM   2594  C2   DC A  82      -7.158  23.913 -13.760  6.00  0.00           C  
ATOM   2595  O2   DC A  82      -6.869  24.367 -14.880  2.00  0.00           O  
ATOM   2596  N3   DC A  82      -8.239  23.092 -13.650  8.00  0.00           N  
ATOM   2597  C4   DC A  82      -8.519  22.609 -12.510  0.00  0.00           C  
ATOM   2598  N4   DC A  82      -9.592  21.901 -12.550  2.00  0.00           N  
ATOM   2599  C5   DC A  82      -7.693  22.704 -11.310  5.00  0.00           C  
ATOM   2600  C6   DC A  82      -6.534  23.447 -11.470  5.00  0.00           C  
ATOM   2601  OP1  DC A  82      -1.209  23.475  -8.640  0.00  0.00           O  
ATOM   2602  OP2  DC A  82      -3.455  22.744  -7.780  8.00  0.00           O1-
ATOM   2603  H5   DC A  82      -7.892  22.198 -10.360  1.00  0.00           H  
ATOM   2604  H6   DC A  82      -5.780  23.577 -10.700  6.00  0.00           H  
ATOM   2605  H1'  DC A  82      -5.174  25.466 -13.810  3.00  0.00           H  
ATOM   2606  H2'  DC A  82      -4.837  25.646 -10.740  8.00  0.00           H  
ATOM   2607  H3'  DC A  82      -2.957  27.064 -11.410  8.00  0.00           H  
ATOM   2608  H4'  DC A  82      -1.959  25.242 -13.020  3.00  0.00           H  
ATOM   2609  H41  DC A  82      -9.972  21.736 -13.450  4.00  0.00           H  
ATOM   2610  H5'  DC A  82      -1.523  23.710 -11.350  8.00  0.00           H  
ATOM   2611  H42  DC A  82      -9.968  21.538 -11.660  1.00  0.00           H  
ATOM   2612 H2''  DC A  82      -5.543  26.901 -11.760  9.00  0.00           H  
ATOM   2613 H5''  DC A  82      -1.543  25.166 -10.620  1.00  0.00           H  
ATOM   2614  P    DC A  83      -3.582  28.784 -13.500  9.00  0.00           P  
ATOM   2615  C5'  DC A  83      -5.204  28.416 -15.520  6.00  0.00           C  
ATOM   2616  O5'  DC A  83      -5.039  28.885 -14.210  8.00  0.00           O  
ATOM   2617  C4'  DC A  83      -6.364  29.008 -16.290  6.00  0.00           C  
ATOM   2618  O4'  DC A  83      -7.460  28.128 -16.070  3.00  0.00           O  
ATOM   2619  C3'  DC A  83      -6.891  30.408 -15.890  4.00  0.00           C  
ATOM   2620  O3'  DC A  83      -7.531  31.002 -17.040  7.00  0.00           O  
ATOM   2621  C2'  DC A  83      -7.964  30.099 -14.800  2.00  0.00           C  
ATOM   2622  C1'  DC A  83      -8.480  28.767 -15.270  6.00  0.00           C  
ATOM   2623  N1   DC A  83      -8.833  27.835 -14.250  2.00  0.00           N  
ATOM   2624  C2   DC A  83     -10.071  27.128 -14.450  0.00  0.00           C  
ATOM   2625  O2   DC A  83     -10.669  27.305 -15.490  7.00  0.00           O  
ATOM   2626  N3   DC A  83     -10.433  26.252 -13.530  8.00  0.00           N  
ATOM   2627  C4   DC A  83      -9.693  26.040 -12.420  5.00  0.00           C  
ATOM   2628  N4   DC A  83     -10.134  25.160 -11.590  0.00  0.00           N  
ATOM   2629  C5   DC A  83      -8.431  26.664 -12.240  7.00  0.00           C  
ATOM   2630  C6   DC A  83      -8.036  27.519 -13.210  9.00  0.00           C  
ATOM   2631  OP1  DC A  83      -2.486  29.314 -14.350  6.00  0.00           O  
ATOM   2632  OP2  DC A  83      -3.753  29.280 -12.100  2.00  0.00           O1-
ATOM   2633  H5   DC A  83      -7.862  26.408 -11.340  8.00  0.00           H  
ATOM   2634  H6   DC A  83      -7.071  28.053 -13.170  3.00  0.00           H  
ATOM   2635  H1'  DC A  83      -9.246  29.008 -15.980  9.00  0.00           H  
ATOM   2636  H2'  DC A  83      -7.490  29.996 -13.780  3.00  0.00           H  
ATOM   2637  H3'  DC A  83      -6.053  30.964 -15.490  3.00  0.00           H  
ATOM   2638  H4'  DC A  83      -6.194  29.093 -17.330  9.00  0.00           H  
ATOM   2639  H41  DC A  83     -11.072  24.850 -11.720  3.00  0.00           H  
ATOM   2640  H5'  DC A  83      -5.289  27.305 -15.550  2.00  0.00           H  
ATOM   2641  H42  DC A  83      -9.801  25.262 -10.690  6.00  0.00           H  
ATOM   2642 H2''  DC A  83      -8.789  30.816 -14.560  5.00  0.00           H  
ATOM   2643 H5''  DC A  83      -4.385  28.788 -16.160  3.00  0.00           H  
ATOM   2644  P    DC A  84      -8.509  32.251 -16.930  0.00  0.00           P  
ATOM   2645  C5'  DC A  84     -10.744  31.008 -17.730  2.00  0.00           C  
ATOM   2646  O5'  DC A  84     -10.002  31.697 -16.650  5.00  0.00           O  
ATOM   2647  C4'  DC A  84     -12.246  30.650 -17.380  4.00  0.00           C  
ATOM   2648  O4'  DC A  84     -12.361  29.601 -16.380  3.00  0.00           O  
ATOM   2649  C3'  DC A  84     -13.258  31.754 -17.030  9.00  0.00           C  
ATOM   2650  O3'  DC A  84     -14.540  31.391 -17.610  8.00  0.00           O  
ATOM   2651  C2'  DC A  84     -13.355  31.568 -15.590  7.00  0.00           C  
ATOM   2652  C1'  DC A  84     -13.269  30.093 -15.420  7.00  0.00           C  
ATOM   2653  N1   DC A  84     -12.896  29.705 -14.030  6.00  0.00           N  
ATOM   2654  C2   DC A  84     -13.847  29.001 -13.250  8.00  0.00           C  
ATOM   2655  O2   DC A  84     -15.037  29.145 -13.490  8.00  0.00           O  
ATOM   2656  N3   DC A  84     -13.423  28.305 -12.170  0.00  0.00           N  
ATOM   2657  C4   DC A  84     -12.186  28.423 -11.870  4.00  0.00           C  
ATOM   2658  N4   DC A  84     -11.868  27.859 -10.800  6.00  0.00           N  
ATOM   2659  C5   DC A  84     -11.259  29.283 -12.490  1.00  0.00           C  
ATOM   2660  C6   DC A  84     -11.638  29.867 -13.640  7.00  0.00           C  
ATOM   2661  OP1  DC A  84      -8.521  32.869 -18.290  0.00  0.00           O  
ATOM   2662  OP2  DC A  84      -8.018  33.088 -15.830  7.00  0.00           O1-
ATOM   2663  H5   DC A  84     -10.253  29.508 -12.150  8.00  0.00           H  
ATOM   2664  H6   DC A  84     -10.999  30.447 -14.300  8.00  0.00           H  
ATOM   2665  H1'  DC A  84     -14.200  29.731 -15.720  2.00  0.00           H  
ATOM   2666  H2'  DC A  84     -12.489  32.024 -15.150  4.00  0.00           H  
ATOM   2667  H3'  DC A  84     -13.084  32.712 -17.350  5.00  0.00           H  
ATOM   2668  H4'  DC A  84     -12.757  30.273 -18.310  7.00  0.00           H  
ATOM   2669  H41  DC A  84     -12.536  27.236 -10.330  5.00  0.00           H  
ATOM   2670  H5'  DC A  84     -10.288  30.090 -18.030  5.00  0.00           H  
ATOM   2671  H42  DC A  84     -10.928  28.019 -10.410  8.00  0.00           H  
ATOM   2672 H2''  DC A  84     -14.272  32.078 -15.230  2.00  0.00           H  
ATOM   2673 H5''  DC A  84     -10.689  31.631 -18.580  7.00  0.00           H  
ATOM   2674  P    DT A  85     -15.570  32.529 -17.960  5.00  0.00           P  
ATOM   2675  C5'  DT A  85     -17.250  31.754 -16.150  9.00  0.00           C  
ATOM   2676  O5'  DT A  85     -16.290  32.715 -16.580  3.00  0.00           O  
ATOM   2677  C4'  DT A  85     -17.779  32.082 -14.770  9.00  0.00           C  
ATOM   2678  O4'  DT A  85     -17.014  31.454 -13.780  1.00  0.00           O  
ATOM   2679  C3'  DT A  85     -18.108  33.543 -14.520  2.00  0.00           C  
ATOM   2680  O3'  DT A  85     -19.226  33.830 -13.690  7.00  0.00           O  
ATOM   2681  C2'  DT A  85     -16.845  33.757 -13.610  1.00  0.00           C  
ATOM   2682  C1'  DT A  85     -16.855  32.440 -12.830  7.00  0.00           C  
ATOM   2683  N1   DT A  85     -15.757  32.146 -11.880  7.00  0.00           N  
ATOM   2684  C2   DT A  85     -15.897  31.161 -10.950  1.00  0.00           C  
ATOM   2685  O2   DT A  85     -16.985  30.562 -10.880  9.00  0.00           O  
ATOM   2686  N3   DT A  85     -14.862  30.747 -10.180  3.00  0.00           N  
ATOM   2687  C4   DT A  85     -13.554  31.274 -10.290  0.00  0.00           C  
ATOM   2688  O4   DT A  85     -12.639  30.926  -9.480  5.00  0.00           O  
ATOM   2689  C5   DT A  85     -13.452  32.280 -11.370  2.00  0.00           C  
ATOM   2690  C6   DT A  85     -14.516  32.640 -12.130  1.00  0.00           C  
ATOM   2691  C7   DT A  85     -12.140  32.871 -11.650  6.00  0.00           C  
ATOM   2692  OP1  DT A  85     -16.577  31.975 -18.910  4.00  0.00           O  
ATOM   2693  OP2  DT A  85     -14.932  33.856 -18.270  4.00  0.00           O1-
ATOM   2694  H3   DT A  85     -14.995  30.122  -9.420  0.00  0.00           H  
ATOM   2695  H6   DT A  85     -14.338  33.366 -12.990  9.00  0.00           H  
ATOM   2696  H1'  DT A  85     -17.768  32.395 -12.210  0.00  0.00           H  
ATOM   2697  H2'  DT A  85     -15.974  33.835 -14.290  5.00  0.00           H  
ATOM   2698  H3'  DT A  85     -18.039  34.235 -15.390  0.00  0.00           H  
ATOM   2699  H4'  DT A  85     -18.748  31.677 -14.810  8.00  0.00           H  
ATOM   2700  H5'  DT A  85     -16.943  30.689 -16.270  4.00  0.00           H  
ATOM   2701  H71  DT A  85     -12.118  33.301 -12.670  8.00  0.00           H  
ATOM   2702  H72  DT A  85     -11.843  33.625 -10.910  8.00  0.00           H  
ATOM   2703  H73  DT A  85     -11.313  32.163 -11.600  2.00  0.00           H  
ATOM   2704 H2''  DT A  85     -16.958  34.665 -13.030  1.00  0.00           H  
ATOM   2705 H5''  DT A  85     -18.094  31.843 -16.880  8.00  0.00           H  
ATOM   2706  P    DA A  86     -20.295  34.911 -14.180  4.00  0.00           P  
ATOM   2707  C5'  DA A  86     -22.249  33.178 -13.500  3.00  0.00           C  
ATOM   2708  O5'  DA A  86     -21.710  34.499 -13.440  8.00  0.00           O  
ATOM   2709  C4'  DA A  86     -22.638  32.568 -12.180  1.00  0.00           C  
ATOM   2710  O4'  DA A  86     -21.545  32.078 -11.460  9.00  0.00           O  
ATOM   2711  C3'  DA A  86     -23.389  33.389 -11.180  9.00  0.00           C  
ATOM   2712  O3'  DA A  86     -24.408  32.487 -10.670  2.00  0.00           O  
ATOM   2713  C2'  DA A  86     -22.375  33.874 -10.210  7.00  0.00           C  
ATOM   2714  C1'  DA A  86     -21.569  32.613 -10.160  3.00  0.00           C  
ATOM   2715  N1   DA A  86     -17.828  30.708  -7.120  1.00  0.00           N  
ATOM   2716  C2   DA A  86     -19.059  30.295  -7.470  3.00  0.00           C  
ATOM   2717  N3   DA A  86     -19.988  30.910  -8.230  9.00  0.00           N  
ATOM   2718  C4   DA A  86     -19.457  32.014  -8.860  7.00  0.00           C  
ATOM   2719  C5   DA A  86     -18.174  32.493  -8.720  7.00  0.00           C  
ATOM   2720  C6   DA A  86     -17.383  31.781  -7.850  0.00  0.00           C  
ATOM   2721  N6   DA A  86     -16.093  32.120  -7.510  9.00  0.00           N  
ATOM   2722  N7   DA A  86     -18.032  33.581  -9.610  1.00  0.00           N  
ATOM   2723  C8   DA A  86     -19.207  33.588 -10.220  0.00  0.00           C  
ATOM   2724  N9   DA A  86     -20.165  32.794  -9.720  2.00  0.00           N  
ATOM   2725  OP1  DA A  86     -20.466  34.735 -15.650  8.00  0.00           O  
ATOM   2726  OP2  DA A  86     -19.952  36.281 -13.730  4.00  0.00           O1-
ATOM   2727  H2   DA A  86     -19.564  29.557  -6.840  2.00  0.00           H  
ATOM   2728  H8   DA A  86     -19.420  34.181 -11.060  6.00  0.00           H  
ATOM   2729  H1'  DA A  86     -22.053  31.877  -9.500  1.00  0.00           H  
ATOM   2730  H2'  DA A  86     -21.781  34.670 -10.650  7.00  0.00           H  
ATOM   2731  H3'  DA A  86     -23.868  34.253 -11.650  3.00  0.00           H  
ATOM   2732  H4'  DA A  86     -23.257  31.694 -12.480  9.00  0.00           H  
ATOM   2733  H5'  DA A  86     -21.518  32.448 -13.950  8.00  0.00           H  
ATOM   2734  H61  DA A  86     -15.619  31.481  -6.870  3.00  0.00           H  
ATOM   2735  H62  DA A  86     -15.675  32.899  -8.030  5.00  0.00           H  
ATOM   2736 H2''  DA A  86     -22.892  34.068  -9.280  2.00  0.00           H  
ATOM   2737 H5''  DA A  86     -23.132  33.309 -14.140  8.00  0.00           H  
ATOM   2738  P    DA A  87     -25.769  32.991  -9.950  9.00  0.00           P  
ATOM   2739  C5'  DA A  87     -25.429  31.533  -7.830  9.00  0.00           C  
ATOM   2740  O5'  DA A  87     -25.390  32.796  -8.470  8.00  0.00           O  
ATOM   2741  C4'  DA A  87     -24.799  31.622  -6.390  2.00  0.00           C  
ATOM   2742  O4'  DA A  87     -23.373  31.802  -6.560  0.00  0.00           O  
ATOM   2743  C3'  DA A  87     -25.289  32.756  -5.490  3.00  0.00           C  
ATOM   2744  O3'  DA A  87     -25.218  32.313  -4.140  4.00  0.00           O  
ATOM   2745  C2'  DA A  87     -24.218  33.752  -5.700  5.00  0.00           C  
ATOM   2746  C1'  DA A  87     -22.956  32.796  -5.640  5.00  0.00           C  
ATOM   2747  N1   DA A  87     -17.929  32.937  -4.590  8.00  0.00           N  
ATOM   2748  C2   DA A  87     -18.860  32.062  -4.200  9.00  0.00           C  
ATOM   2749  N3   DA A  87     -20.114  32.047  -4.630  9.00  0.00           N  
ATOM   2750  C4   DA A  87     -20.392  33.012  -5.530  6.00  0.00           C  
ATOM   2751  C5   DA A  87     -19.569  34.004  -5.960  4.00  0.00           C  
ATOM   2752  C6   DA A  87     -18.296  33.953  -5.380  3.00  0.00           C  
ATOM   2753  N6   DA A  87     -17.359  34.908  -5.370  3.00  0.00           N  
ATOM   2754  N7   DA A  87     -20.222  34.916  -6.820  4.00  0.00           N  
ATOM   2755  C8   DA A  87     -21.464  34.510  -6.790  5.00  0.00           C  
ATOM   2756  N9   DA A  87     -21.669  33.354  -6.070  3.00  0.00           N  
ATOM   2757  OP1  DA A  87     -26.866  32.104 -10.370  1.00  0.00           O  
ATOM   2758  OP2  DA A  87     -25.985  34.456 -10.170  2.00  0.00           O1-
ATOM   2759  H2   DA A  87     -18.504  31.236  -3.530  3.00  0.00           H  
ATOM   2760  H8   DA A  87     -22.247  34.973  -7.230  9.00  0.00           H  
ATOM   2761  H1'  DA A  87     -22.739  32.273  -4.660  7.00  0.00           H  
ATOM   2762  H2'  DA A  87     -24.369  34.284  -6.640  1.00  0.00           H  
ATOM   2763  H3'  DA A  87     -26.256  33.060  -5.930  3.00  0.00           H  
ATOM   2764  H4'  DA A  87     -24.996  30.662  -5.860  6.00  0.00           H  
ATOM   2765  H5'  DA A  87     -24.862  30.888  -8.460  4.00  0.00           H  
ATOM   2766  H61  DA A  87     -16.450  34.697  -4.910  1.00  0.00           H  
ATOM   2767  H62  DA A  87     -17.462  35.668  -6.010  9.00  0.00           H  
ATOM   2768 H2''  DA A  87     -24.125  34.443  -4.880  6.00  0.00           H  
ATOM   2769 H5''  DA A  87     -26.466  31.133  -7.820  7.00  0.00           H  
ATOM   2770  P    DC A  88     -26.412  31.873  -3.210  7.00  0.00           P  
ATOM   2771  C5'  DC A  88     -24.857  30.107  -2.040  9.00  0.00           C  
ATOM   2772  O5'  DC A  88     -25.567  31.372  -1.990  2.00  0.00           O  
ATOM   2773  C4'  DC A  88     -23.665  29.897  -1.130  1.00  0.00           C  
ATOM   2774  O4'  DC A  88     -22.542  30.577  -1.670  9.00  0.00           O  
ATOM   2775  C3'  DC A  88     -23.926  30.488   0.240  3.00  0.00           C  
ATOM   2776  O3'  DC A  88     -23.498  29.617   1.150  4.00  0.00           O  
ATOM   2777  C2'  DC A  88     -23.193  31.765   0.120  8.00  0.00           C  
ATOM   2778  C1'  DC A  88     -21.972  31.404  -0.730  2.00  0.00           C  
ATOM   2779  N1   DC A  88     -21.323  32.611  -1.390  3.00  0.00           N  
ATOM   2780  C2   DC A  88     -20.015  32.886  -1.060  8.00  0.00           C  
ATOM   2781  O2   DC A  88     -19.375  32.271  -0.190  2.00  0.00           O  
ATOM   2782  N3   DC A  88     -19.439  33.980  -1.570  9.00  0.00           N  
ATOM   2783  C4   DC A  88     -20.066  34.728  -2.440  0.00  0.00           C  
ATOM   2784  N4   DC A  88     -19.504  35.766  -2.930  1.00  0.00           N  
ATOM   2785  C5   DC A  88     -21.408  34.458  -2.780  9.00  0.00           C  
ATOM   2786  C6   DC A  88     -22.006  33.347  -2.320  2.00  0.00           C  
ATOM   2787  OP1  DC A  88     -27.119  30.754  -3.910  0.00  0.00           O  
ATOM   2788  OP2  DC A  88     -27.147  33.073  -2.800  0.00  0.00           O1-
ATOM   2789  H5   DC A  88     -21.944  35.105  -3.490  2.00  0.00           H  
ATOM   2790  H6   DC A  88     -23.086  33.142  -2.490  9.00  0.00           H  
ATOM   2791  H1'  DC A  88     -21.210  30.853  -0.190  5.00  0.00           H  
ATOM   2792  H2'  DC A  88     -23.963  32.497  -0.190  5.00  0.00           H  
ATOM   2793  H3'  DC A  88     -25.003  30.630   0.390  1.00  0.00           H  
ATOM   2794  H4'  DC A  88     -23.504  28.851  -1.080  9.00  0.00           H  
ATOM   2795  H41  DC A  88     -18.494  35.843  -2.890  2.00  0.00           H  
ATOM   2796  H5'  DC A  88     -24.530  29.847  -3.020  8.00  0.00           H  
ATOM   2797  H42  DC A  88     -20.025  36.459  -3.440  6.00  0.00           H  
ATOM   2798 H2''  DC A  88     -22.875  32.012   1.200  0.00  0.00           H  
ATOM   2799 H5''  DC A  88     -25.572  29.336  -1.700  4.00  0.00           H  
ATOM   2800  P    DC A  89     -23.834  29.857   2.790  0.00  0.00           P  
ATOM   2801  C5'  DC A  89     -21.389  30.674   3.160  4.00  0.00           C  
ATOM   2802  O5'  DC A  89     -22.811  30.974   3.270  1.00  0.00           O  
ATOM   2803  C4'  DC A  89     -20.447  31.700   3.630  8.00  0.00           C  
ATOM   2804  O4'  DC A  89     -20.522  32.778   2.740  8.00  0.00           O  
ATOM   2805  C3'  DC A  89     -20.787  32.401   4.940  5.00  0.00           C  
ATOM   2806  O3'  DC A  89     -19.629  32.318   5.860  7.00  0.00           O  
ATOM   2807  C2'  DC A  89     -21.083  33.825   4.580  9.00  0.00           C  
ATOM   2808  C1'  DC A  89     -20.089  33.951   3.450  5.00  0.00           C  
ATOM   2809  N1   DC A  89     -20.251  35.060   2.460  6.00  0.00           N  
ATOM   2810  C2   DC A  89     -19.211  35.974   2.280  7.00  0.00           C  
ATOM   2811  O2   DC A  89     -18.133  36.022   2.890  7.00  0.00           O  
ATOM   2812  N3   DC A  89     -19.326  36.906   1.300  5.00  0.00           N  
ATOM   2813  C4   DC A  89     -20.353  36.867   0.480  4.00  0.00           C  
ATOM   2814  N4   DC A  89     -20.330  37.781  -0.410  3.00  0.00           N  
ATOM   2815  C5   DC A  89     -21.438  36.014   0.640  5.00  0.00           C  
ATOM   2816  C6   DC A  89     -21.351  35.136   1.660  9.00  0.00           C  
ATOM   2817  OP1  DC A  89     -23.398  28.645   3.480  9.00  0.00           O  
ATOM   2818  OP2  DC A  89     -25.197  30.339   3.040  8.00  0.00           O1-
ATOM   2819  H5   DC A  89     -22.219  35.971  -0.080  2.00  0.00           H  
ATOM   2820  H6   DC A  89     -22.118  34.516   1.900  3.00  0.00           H  
ATOM   2821  H1'  DC A  89     -19.038  33.940   3.850  6.00  0.00           H  
ATOM   2822  H2'  DC A  89     -22.092  34.010   4.260  0.00  0.00           H  
ATOM   2823  H3'  DC A  89     -21.644  31.865   5.430  5.00  0.00           H  
ATOM   2824  H4'  DC A  89     -19.495  31.318   3.560  6.00  0.00           H  
ATOM   2825  H41  DC A  89     -19.420  38.149  -0.690  5.00  0.00           H  
ATOM   2826  H5'  DC A  89     -21.149  30.385   2.160  8.00  0.00           H  
ATOM   2827  H42  DC A  89     -21.151  37.988  -0.980  1.00  0.00           H  
ATOM   2828 H2''  DC A  89     -20.853  34.554   5.360  1.00  0.00           H  
ATOM   2829 H5''  DC A  89     -21.191  29.731   3.760  5.00  0.00           H  
ATOM   2830  P   DC3 A  90     -19.735  32.817   7.360  8.00  0.00           P  
ATOM   2831  C5' DC3 A  90     -17.385  34.130   7.710  3.00  0.00           C  
ATOM   2832  O5' DC3 A  90     -18.847  34.133   7.570  8.00  0.00           O  
ATOM   2833  C4' DC3 A  90     -16.733  35.457   7.910  3.00  0.00           C  
ATOM   2834  O4' DC3 A  90     -17.094  36.147   6.690  3.00  0.00           O  
ATOM   2835  C3' DC3 A  90     -17.129  36.423   9.020  7.00  0.00           C  
ATOM   2836  O3' DC3 A  90     -16.055  36.666   9.930  4.00  0.00           O  
ATOM   2837  C2' DC3 A  90     -17.522  37.707   8.300  2.00  0.00           C  
ATOM   2838  C1' DC3 A  90     -17.132  37.538   6.890  2.00  0.00           C  
ATOM   2839  N1  DC3 A  90     -18.163  37.989   5.870  7.00  0.00           N  
ATOM   2840  C2  DC3 A  90     -17.951  39.114   5.040  8.00  0.00           C  
ATOM   2841  O2  DC3 A  90     -16.896  39.713   5.150  9.00  0.00           O  
ATOM   2842  N3  DC3 A  90     -18.879  39.570   4.220  9.00  0.00           N  
ATOM   2843  C4  DC3 A  90     -20.020  38.902   4.140  5.00  0.00           C  
ATOM   2844  N4  DC3 A  90     -20.824  39.328   3.210  6.00  0.00           N  
ATOM   2845  C5  DC3 A  90     -20.414  37.840   4.980  4.00  0.00           C  
ATOM   2846  C6  DC3 A  90     -19.464  37.351   5.820  0.00  0.00           C  
ATOM   2847  OP1 DC3 A  90     -19.202  31.764   8.260  4.00  0.00           O  
ATOM   2848  OP2 DC3 A  90     -21.117  33.179   7.620  1.00  0.00           O  
ATOM   2849 HO3' DC3 A  90     -16.321  37.380  10.530  7.00  0.00           H  
ATOM   2850  H5  DC3 A  90     -21.374  37.393   4.890  1.00  0.00           H  
ATOM   2851  H6  DC3 A  90     -19.785  36.512   6.540  1.00  0.00           H  
ATOM   2852  H1' DC3 A  90     -16.184  37.998   6.630  4.00  0.00           H  
ATOM   2853  H2' DC3 A  90     -18.552  38.022   8.490  9.00  0.00           H  
ATOM   2854  H3' DC3 A  90     -18.059  36.024   9.480  2.00  0.00           H  
ATOM   2855  H4' DC3 A  90     -15.656  35.310   7.870  6.00  0.00           H  
ATOM   2856  H41 DC3 A  90     -20.582  40.249   2.810  9.00  0.00           H  
ATOM   2857  H5' DC3 A  90     -17.001  33.689   6.780  3.00  0.00           H  
ATOM   2858  H42 DC3 A  90     -21.736  38.936   3.090  6.00  0.00           H  
ATOM   2859 H2'' DC3 A  90     -16.943  38.642   8.620  5.00  0.00           H  
ATOM   2860 H5'' DC3 A  90     -17.100  33.680   8.680  9.00  0.00           H  
ATOM   3171  C   CNT A 208      10.096 -23.320 -17.680  3.00  0.00           C  
ATOM   3172  C   CNT A 208       9.326 -23.916 -16.640  1.00  0.00           C  
ATOM   3173  C   CNT A 208       8.665 -22.939 -15.810  0.00  0.00           C  
ATOM   3174  C   CNT A 208       8.221 -23.284 -14.470  4.00  0.00           C  
ATOM   3175  C   CNT A 208       9.216 -25.268 -16.100  0.00  0.00           C  
ATOM   3176  C   CNT A 208       9.385 -25.440 -14.680  6.00  0.00           C  
ATOM   3177  C   CNT A 208       8.799 -24.404 -13.910  2.00  0.00           C  
ATOM   3178  C   CNT A 208       9.030 -24.302 -12.500  7.00  0.00           C  
ATOM   3179  C   CNT A 208      10.463 -26.126 -14.020  5.00  0.00           C  
ATOM   3180  C   CNT A 208      10.980 -25.761 -12.730  3.00  0.00           C  
ATOM   3181  C   CNT A 208      10.206 -24.898 -11.940  4.00  0.00           C  
ATOM   3182  C   CNT A 208      10.831 -24.223 -10.800  4.00  0.00           C  
ATOM   3183  C   CNT A 208      12.324 -25.950 -12.310  5.00  0.00           C  
ATOM   3184  C   CNT A 208      12.980 -25.080 -11.510  2.00  0.00           C  
ATOM   3185  C   CNT A 208      12.234 -24.124 -10.840  4.00  0.00           C  
ATOM   3186  C   CNT A 208      12.874 -22.993 -10.270  2.00  0.00           C  
ATOM   3187  C   CNT A 208      14.417 -24.794 -11.510  4.00  0.00           C  
ATOM   3188  C   CNT A 208      14.889 -23.479 -11.570  6.00  0.00           C  
ATOM   3189  C   CNT A 208      14.107 -22.617 -10.750  8.00  0.00           C  
ATOM   3190  C   CNT A 208      14.455 -21.218 -10.700  4.00  0.00           C  
ATOM   3191  C   CNT A 208      15.991 -22.920 -12.150  7.00  0.00           C  
ATOM   3192  C   CNT A 208      15.913 -21.556 -12.570  8.00  0.00           C  
ATOM   3193  C   CNT A 208      15.170 -20.698 -11.790  9.00  0.00           C  
ATOM   3194  C   CNT A 208      14.851 -19.405 -12.300  7.00  0.00           C  
ATOM   3195  C   CNT A 208      16.419 -21.140 -13.810  5.00  0.00           C  
ATOM   3196  C   CNT A 208      15.908 -20.020 -14.500  0.00  0.00           C  
ATOM   3197  C   CNT A 208      15.079 -19.149 -13.720  7.00  0.00           C  
ATOM   3198  C   CNT A 208      14.104 -18.338 -14.360  0.00  0.00           C  
ATOM   3199  C   CNT A 208      15.891 -19.717 -15.930  5.00  0.00           C  
ATOM   3200  C   CNT A 208      14.524 -19.510 -16.480  2.00  0.00           C  
ATOM   3201  C   CNT A 208      13.659 -18.674 -15.660  2.00  0.00           C  
ATOM   3202  C   CNT A 208      12.289 -18.528 -16.000  4.00  0.00           C  
ATOM   3203  C   CNT A 208      13.836 -20.242 -17.450  2.00  0.00           C  
ATOM   3204  C   CNT A 208      12.445 -20.372 -17.670  5.00  0.00           C  
ATOM   3205  C   CNT A 208      11.668 -19.536 -16.790  9.00  0.00           C  
ATOM   3206  C   CNT A 208      10.293 -19.828 -16.560  0.00  0.00           C  
ATOM   3207  C   CNT A 208      11.681 -21.417 -18.310  4.00  0.00           C  
ATOM   3208  C   CNT A 208      10.460 -21.952 -17.770  2.00  0.00           C  
ATOM   3209  C   CNT A 208       9.772 -21.123 -16.910  6.00  0.00           C  
ATOM   3210  C   CNT A 208       8.685 -21.570 -16.150  6.00  0.00           C  
ATOM   3211  C   CNT A 208       7.863 -20.655 -15.380  3.00  0.00           C  
ATOM   3212  C   CNT A 208       7.151 -21.131 -14.260  1.00  0.00           C  
ATOM   3213  C   CNT A 208       6.485 -20.194 -13.420  9.00  0.00           C  
ATOM   3214  C   CNT A 208       5.903 -20.659 -12.190  5.00  0.00           C  
ATOM   3215  C   CNT A 208       7.516 -22.362 -13.720  0.00  0.00           C  
ATOM   3216  C   CNT A 208       7.345 -22.572 -12.330  4.00  0.00           C  
ATOM   3217  C   CNT A 208       6.576 -21.711 -11.500  5.00  0.00           C  
ATOM   3218  C   CNT A 208       6.799 -21.699 -10.120  5.00  0.00           C  
ATOM   3219  C   CNT A 208       8.264 -23.450 -11.650  4.00  0.00           C  
ATOM   3220  C   CNT A 208       8.788 -23.075 -10.390  4.00  0.00           C  
ATOM   3221  C   CNT A 208       8.016 -22.164  -9.630  8.00  0.00           C  
ATOM   3222  C   CNT A 208       8.589 -21.532  -8.550  7.00  0.00           C  
ATOM   3223  C   CNT A 208      10.089 -23.338  -9.980  2.00  0.00           C  
ATOM   3224  C   CNT A 208      10.737 -22.443  -9.220  0.00  0.00           C  
ATOM   3225  C   CNT A 208       9.987 -21.545  -8.430  0.00  0.00           C  
ATOM   3226  C   CNT A 208      10.568 -20.439  -7.810  7.00  0.00           C  
ATOM   3227  C   CNT A 208      12.086 -22.172  -9.510  9.00  0.00           C  
ATOM   3228  C   CNT A 208      12.539 -20.873  -9.250  6.00  0.00           C  
ATOM   3229  C   CNT A 208      11.757 -19.989  -8.450  3.00  0.00           C  
ATOM   3230  C   CNT A 208      12.003 -18.626  -8.440  5.00  0.00           C  
ATOM   3231  C   CNT A 208      13.554 -20.354 -10.050  7.00  0.00           C  
ATOM   3232  C   CNT A 208      13.585 -18.972 -10.280  3.00  0.00           C  
ATOM   3233  C   CNT A 208      12.759 -18.114  -9.520  9.00  0.00           C  
ATOM   3234  C   CNT A 208      12.408 -16.840 -10.010  5.00  0.00           C  
ATOM   3235  C   CNT A 208      14.068 -18.544 -11.560  9.00  0.00           C  
ATOM   3236  C   CNT A 208      13.504 -17.406 -12.150  5.00  0.00           C  
ATOM   3237  C   CNT A 208      12.595 -16.615 -11.420  9.00  0.00           C  
ATOM   3238  C   CNT A 208      11.656 -15.761 -12.040  5.00  0.00           C  
ATOM   3239  C   CNT A 208      13.270 -17.527 -13.560  5.00  0.00           C  
ATOM   3240  C   CNT A 208      12.020 -17.074 -14.120  2.00  0.00           C  
ATOM   3241  C   CNT A 208      11.252 -16.099 -13.360  7.00  0.00           C  
ATOM   3242  C   CNT A 208       9.934 -15.823 -13.760  1.00  0.00           C  
ATOM   3243  C   CNT A 208      11.463 -17.766 -15.170  7.00  0.00           C  
ATOM   3244  C   CNT A 208      10.081 -17.700 -15.330  8.00  0.00           C  
ATOM   3245  C   CNT A 208       9.284 -16.845 -14.550  9.00  0.00           C  
ATOM   3246  C   CNT A 208       7.904 -17.099 -14.400  9.00  0.00           C  
ATOM   3247  C   CNT A 208       9.475 -18.948 -15.810  6.00  0.00           C  
ATOM   3248  C   CNT A 208       8.179 -19.253 -15.400  1.00  0.00           C  
ATOM   3249  C   CNT A 208       7.432 -18.397 -14.580  1.00  0.00           C  
ATOM   3250  C   CNT A 208       6.439 -18.856 -13.750  7.00  0.00           C  
ATOM   3251  C   CNT A 208       5.720 -17.941 -12.930  7.00  0.00           C  
ATOM   3252  C   CNT A 208       4.996 -18.439 -11.860  8.00  0.00           C  
ATOM   3253  C   CNT A 208       4.168 -17.591 -11.090  4.00  0.00           C  
ATOM   3254  C   CNT A 208       3.758 -17.936  -9.770  9.00  0.00           C  
ATOM   3255  C   CNT A 208       5.135 -19.738 -11.410  7.00  0.00           C  
ATOM   3256  C   CNT A 208       5.061 -19.938 -10.010  0.00  0.00           C  
ATOM   3257  C   CNT A 208       4.285 -19.087  -9.200  5.00  0.00           C  
ATOM   3258  C   CNT A 208       4.473 -19.096  -7.790  3.00  0.00           C  
ATOM   3259  C   CNT A 208       6.064 -20.726  -9.390  0.00  0.00           C  
ATOM   3260  C   CNT A 208       6.532 -20.360  -8.170  9.00  0.00           C  
ATOM   3261  C   CNT A 208       5.752 -19.546  -7.300  6.00  0.00           C  
ATOM   3262  C   CNT A 208       6.301 -18.953  -6.130  5.00  0.00           C  
ATOM   3263  C   CNT A 208       7.856 -20.638  -7.790  0.00  0.00           C  
ATOM   3264  C   CNT A 208       8.460 -19.829  -6.800  9.00  0.00           C  
ATOM   3265  C   CNT A 208       7.674 -18.972  -6.050  6.00  0.00           C  
ATOM   3266  C   CNT A 208       8.278 -17.808  -5.500  3.00  0.00           C  
ATOM   3267  C   CNT A 208       9.830 -19.648  -6.940  1.00  0.00           C  
ATOM   3268  C   CNT A 208      10.287 -18.319  -6.770  4.00  0.00           C  
ATOM   3269  C   CNT A 208       9.486 -17.399  -5.990  6.00  0.00           C  
ATOM   3270  C   CNT A 208       9.817 -15.986  -6.070  0.00  0.00           C  
ATOM   3271  C   CNT A 208      11.175 -17.754  -7.740  3.00  0.00           C  
ATOM   3272  C   CNT A 208      11.133 -16.408  -8.050  0.00  0.00           C  
ATOM   3273  C   CNT A 208      10.449 -15.511  -7.250  2.00  0.00           C  
ATOM   3274  C   CNT A 208      10.114 -14.268  -7.760  5.00  0.00           C  
ATOM   3275  C   CNT A 208      11.590 -16.007  -9.270  7.00  0.00           C  
ATOM   3276  C   CNT A 208      10.954 -14.934  -9.920  5.00  0.00           C  
ATOM   3277  C   CNT A 208      10.183 -14.023  -9.160  3.00  0.00           C  
ATOM   3278  C   CNT A 208       9.373 -13.100  -9.780  1.00  0.00           C  
ATOM   3279  C   CNT A 208      10.887 -14.899 -11.290  7.00  0.00           C  
ATOM   3280  C   CNT A 208       9.749 -14.311 -11.890  5.00  0.00           C  
ATOM   3281  C   CNT A 208       8.990 -13.364 -11.080  9.00  0.00           C  
ATOM   3282  C   CNT A 208       7.632 -13.190 -11.400  2.00  0.00           C  
ATOM   3283  C   CNT A 208       9.183 -14.943 -12.960  7.00  0.00           C  
ATOM   3284  C   CNT A 208       7.764 -14.916 -13.100  4.00  0.00           C  
ATOM   3285  C   CNT A 208       6.988 -14.101 -12.260  7.00  0.00           C  
ATOM   3286  C   CNT A 208       5.658 -14.430 -11.970  3.00  0.00           C  
ATOM   3287  C   CNT A 208       7.217 -16.207 -13.510  4.00  0.00           C  
ATOM   3288  C   CNT A 208       5.969 -16.584 -12.980  2.00  0.00           C  
ATOM   3289  C   CNT A 208       5.178 -15.723 -12.190  8.00  0.00           C  
ATOM   3290  C   CNT A 208       4.168 -16.203 -11.380  8.00  0.00           C  
ATOM   3291  C   CNT A 208       3.341 -15.310 -10.670  8.00  0.00           C  
ATOM   3292  C   CNT A 208       2.681 -15.757  -9.500  6.00  0.00           C  
ATOM   3293  C   CNT A 208       1.798 -14.898  -8.850  2.00  0.00           C  
ATOM   3294  C   CNT A 208       1.484 -15.288  -7.550  7.00  0.00           C  
ATOM   3295  C   CNT A 208       3.029 -17.006  -8.960  2.00  0.00           C  
ATOM   3296  C   CNT A 208       2.817 -17.287  -7.640  3.00  0.00           C  
ATOM   3297  C   CNT A 208       2.079 -16.405  -6.890  7.00  0.00           C  
ATOM   3298  C   CNT A 208       2.245 -16.353  -5.530  4.00  0.00           C  
ATOM   3299  C   CNT A 208       3.676 -18.239  -6.990  6.00  0.00           C  
ATOM   3300  C   CNT A 208       4.133 -17.910  -5.730  6.00  0.00           C  
ATOM   3301  C   CNT A 208       3.358 -17.020  -4.980  4.00  0.00           C  
ATOM   3302  C   CNT A 208       3.918 -16.352  -3.880  7.00  0.00           C  
ATOM   3303  C   CNT A 208       5.481 -18.112  -5.370  4.00  0.00           C  
ATOM   3304  C   CNT A 208       6.109 -17.252  -4.480  9.00  0.00           C  
ATOM   3305  C   CNT A 208       5.365 -16.290  -3.780  7.00  0.00           C  
ATOM   3306  C   CNT A 208       5.984 -15.143  -3.180  9.00  0.00           C  
ATOM   3307  C   CNT A 208       7.452 -16.924  -4.680  0.00  0.00           C  
ATOM   3308  C   CNT A 208       7.949 -15.638  -4.460  3.00  0.00           C  
ATOM   3309  C   CNT A 208       7.236 -14.702  -3.670  2.00  0.00           C  
ATOM   3310  C   CNT A 208       7.424 -13.336  -3.820  7.00  0.00           C  
ATOM   3311  C   CNT A 208       9.029 -15.125  -5.240  1.00  0.00           C  
ATOM   3312  C   CNT A 208       8.972 -13.753  -5.660  7.00  0.00           C  
ATOM   3313  C   CNT A 208       8.240 -12.835  -4.820  8.00  0.00           C  
ATOM   3314  C   CNT A 208       7.994 -11.537  -5.320  9.00  0.00           C  
ATOM   3315  C   CNT A 208       9.340 -13.386  -6.940  8.00  0.00           C  
ATOM   3316  C   CNT A 208       8.844 -12.245  -7.560  7.00  0.00           C  
ATOM   3317  C   CNT A 208       8.047 -11.383  -6.720  6.00  0.00           C  
ATOM   3318  C   CNT A 208       7.054 -10.578  -7.330  4.00  0.00           C  
ATOM   3319  C   CNT A 208       8.653 -12.240  -8.960  5.00  0.00           C  
ATOM   3320  C   CNT A 208       7.453 -11.649  -9.470  2.00  0.00           C  
ATOM   3321  C   CNT A 208       6.638 -10.873  -8.650  3.00  0.00           C  
ATOM   3322  C   CNT A 208       5.228 -10.711  -8.930  8.00  0.00           C  
ATOM   3323  C   CNT A 208       6.865 -12.321 -10.550  4.00  0.00           C  
ATOM   3324  C   CNT A 208       5.481 -12.416 -10.660  5.00  0.00           C  
ATOM   3325  C   CNT A 208       4.618 -11.572  -9.870  1.00  0.00           C  
ATOM   3326  C   CNT A 208       3.252 -11.728  -9.790  7.00  0.00           C  
ATOM   3327  C   CNT A 208       4.886 -13.558 -11.160  8.00  0.00           C  
ATOM   3328  C   CNT A 208       3.551 -13.934 -10.840  5.00  0.00           C  
ATOM   3329  C   CNT A 208       2.775 -13.014 -10.070  3.00  0.00           C  
ATOM   3330  C   CNT A 208       1.717 -13.599  -9.220  6.00  0.00           C  
ATOM   3331  C   CNT A 208       0.951 -12.702  -8.460  7.00  0.00           C  
ATOM   3332  C   CNT A 208       0.289 -13.196  -7.330  7.00  0.00           C  
ATOM   3333  C   CNT A 208      -0.491 -12.321  -6.610  6.00  0.00           C  
ATOM   3334  C   CNT A 208      -0.917 -12.776  -5.310  2.00  0.00           C  
ATOM   3335  C   CNT A 208       0.699 -14.394  -6.800  4.00  0.00           C  
ATOM   3336  C   CNT A 208       0.575 -14.588  -5.440  3.00  0.00           C  
ATOM   3337  C   CNT A 208      -0.161 -13.750  -4.620  8.00  0.00           C  
ATOM   3338  C   CNT A 208      -0.074 -13.803  -3.240  2.00  0.00           C  
ATOM   3339  C   CNT A 208       1.468 -15.492  -4.790  9.00  0.00           C  
ATOM   3340  C   CNT A 208       1.816 -15.260  -3.470  0.00  0.00           C  
ATOM   3341  C   CNT A 208       1.046 -14.414  -2.640  8.00  0.00           C  
ATOM   3342  C   CNT A 208       1.642 -13.687  -1.600  2.00  0.00           C  
ATOM   3343  C   CNT A 208       3.150 -15.469  -3.100  7.00  0.00           C  
ATOM   3344  C   CNT A 208       3.823 -14.527  -2.350  6.00  0.00           C  
ATOM   3345  C   CNT A 208       3.058 -13.584  -1.580  0.00  0.00           C  
ATOM   3346  C   CNT A 208       3.664 -12.497  -0.970  9.00  0.00           C  
ATOM   3347  C   CNT A 208       5.147 -14.217  -2.510  8.00  0.00           C  
ATOM   3348  C   CNT A 208       5.659 -12.971  -2.190  4.00  0.00           C  
ATOM   3349  C   CNT A 208       4.909 -12.068  -1.460  4.00  0.00           C  
ATOM   3350  C   CNT A 208       5.129 -10.720  -1.430  8.00  0.00           C  
ATOM   3351  C   CNT A 208       6.686 -12.430  -3.010  4.00  0.00           C  
ATOM   3352  C   CNT A 208       6.771 -11.024  -3.240  0.00  0.00           C  
ATOM   3353  C   CNT A 208       5.958 -10.212  -2.480  2.00  0.00           C  
ATOM   3354  C   CNT A 208       5.669  -8.973  -2.990  4.00  0.00           C  
ATOM   3355  C   CNT A 208       7.184 -10.670  -4.550  9.00  0.00           C  
ATOM   3356  C   CNT A 208       6.494  -9.601  -5.220  8.00  0.00           C  
ATOM   3357  C   CNT A 208       5.664  -8.865  -4.420  3.00  0.00           C  
ATOM   3358  C   CNT A 208       4.739  -8.011  -4.970  5.00  0.00           C  
ATOM   3359  C   CNT A 208       6.240  -9.750  -6.590  7.00  0.00           C  
ATOM   3360  C   CNT A 208       5.079  -9.194  -7.100  0.00  0.00           C  
ATOM   3361  C   CNT A 208       4.314  -8.263  -6.310  0.00  0.00           C  
ATOM   3362  C   CNT A 208       3.009  -8.035  -6.720  8.00  0.00           C  
ATOM   3363  C   CNT A 208       4.433  -9.896  -8.170  1.00  0.00           C  
ATOM   3364  C   CNT A 208       3.082  -9.813  -8.430  4.00  0.00           C  
ATOM   3365  C   CNT A 208       2.383  -8.948  -7.530  3.00  0.00           C  
ATOM   3366  C   CNT A 208       1.013  -9.153  -7.340  5.00  0.00           C  
ATOM   3367  C   CNT A 208       2.431 -10.857  -9.090  8.00  0.00           C  
ATOM   3368  C   CNT A 208       1.242 -11.325  -8.500  7.00  0.00           C  
ATOM   3369  C   CNT A 208       0.510 -10.434  -7.700  0.00  0.00           C  
ATOM   3370  C   CNT A 208      -0.528 -10.962  -6.910  4.00  0.00           C  
ATOM   3371  C   CNT A 208      -1.260 -10.056  -6.060  7.00  0.00           C  
ATOM   3372  C   CNT A 208      -1.999 -10.610  -4.970  4.00  0.00           C  
ATOM   3373  C   CNT A 208      -2.701  -9.706  -4.180  7.00  0.00           C  
ATOM   3374  C   CNT A 208      -3.195 -10.103  -2.930  8.00  0.00           C  
ATOM   3375  C   CNT A 208      -1.654 -11.904  -4.470  4.00  0.00           C  
ATOM   3376  C   CNT A 208      -1.821 -12.135  -3.080  6.00  0.00           C  
ATOM   3377  C   CNT A 208      -2.553 -11.215  -2.360  6.00  0.00           C  
ATOM   3378  C   CNT A 208      -2.331 -11.131  -0.930  5.00  0.00           C  
ATOM   3379  C   CNT A 208      -0.889 -13.019  -2.420  4.00  0.00           C  
ATOM   3380  C   CNT A 208      -0.458 -12.645  -1.110  7.00  0.00           C  
ATOM   3381  C   CNT A 208      -1.219 -11.732  -0.370  7.00  0.00           C  
ATOM   3382  C   CNT A 208      -0.625 -11.124   0.760  9.00  0.00           C  
ATOM   3383  C   CNT A 208       0.896 -12.873  -0.770  0.00  0.00           C  
ATOM   3384  C   CNT A 208       1.541 -11.984   0.090  7.00  0.00           C  
ATOM   3385  C   CNT A 208       0.788 -11.113   0.900  0.00  0.00           C  
ATOM   3386  C   CNT A 208       1.407  -9.928   1.430  6.00  0.00           C  
ATOM   3387  C   CNT A 208       2.892 -11.666  -0.120  0.00  0.00           C  
ATOM   3388  C   CNT A 208       3.361 -10.349   0.100  1.00  0.00           C  
ATOM   3389  C   CNT A 208       2.539  -9.447   0.850  5.00  0.00           C  
ATOM   3390  C   CNT A 208       2.792  -8.097   0.780  3.00  0.00           C  
ATOM   3391  C   CNT A 208       4.393  -9.831  -0.700  4.00  0.00           C  
ATOM   3392  C   CNT A 208       4.418  -8.480  -0.970  4.00  0.00           C  
ATOM   3393  C   CNT A 208       3.581  -7.600  -0.300  6.00  0.00           C  
ATOM   3394  C   CNT A 208       3.259  -6.289  -0.770  0.00  0.00           C  
ATOM   3395  C   CNT A 208       4.902  -8.021  -2.210  7.00  0.00           C  
ATOM   3396  C   CNT A 208       4.265  -6.963  -2.870  8.00  0.00           C  
ATOM   3397  C   CNT A 208       3.502  -6.026  -2.140  1.00  0.00           C  
ATOM   3398  C   CNT A 208       2.540  -5.159  -2.770  7.00  0.00           C  
ATOM   3399  C   CNT A 208       3.977  -7.130  -4.260  4.00  0.00           C  
ATOM   3400  C   CNT A 208       2.899  -6.432  -4.850  0.00  0.00           C  
ATOM   3401  C   CNT A 208       2.194  -5.467  -4.080  0.00  0.00           C  
ATOM   3402  C   CNT A 208       0.829  -5.243  -4.410  4.00  0.00           C  
ATOM   3403  C   CNT A 208       2.283  -7.041  -6.020  9.00  0.00           C  
ATOM   3404  C   CNT A 208       0.906  -7.099  -6.010  2.00  0.00           C  
ATOM   3405  C   CNT A 208       0.171  -6.216  -5.220  2.00  0.00           C  
ATOM   3406  C   CNT A 208      -1.158  -6.537  -4.950  7.00  0.00           C  
ATOM   3407  C   CNT A 208       0.248  -8.231  -6.610  2.00  0.00           C  
ATOM   3408  C   CNT A 208      -0.890  -8.696  -5.980  6.00  0.00           C  
ATOM   3409  C   CNT A 208      -1.648  -7.797  -5.240  7.00  0.00           C  
ATOM   3410  C   CNT A 208      -2.709  -8.358  -4.470  2.00  0.00           C  
ATOM   3411  C   CNT A 208      -3.538  -7.483  -3.740  9.00  0.00           C  
ATOM   3412  C   CNT A 208      -4.295  -7.985  -2.660  6.00  0.00           C  
ATOM   3413  C   CNT A 208      -5.101  -7.053  -1.940  7.00  0.00           C  
ATOM   3414  C   CNT A 208      -5.409  -7.399  -0.610  2.00  0.00           C  
ATOM   3415  C   CNT A 208      -3.977  -9.253  -2.200  6.00  0.00           C  
ATOM   3416  C   CNT A 208      -4.149  -9.505  -0.780  5.00  0.00           C  
ATOM   3417  C   CNT A 208      -4.897  -8.530   0.020  6.00  0.00           C  
ATOM   3418  C   CNT A 208      -4.706  -8.554   1.420  3.00  0.00           C  
ATOM   3419  C   CNT A 208      -3.100 -10.216  -0.200  3.00  0.00           C  
ATOM   3420  C   CNT A 208      -2.713  -9.885   1.100  5.00  0.00           C  
ATOM   3421  C   CNT A 208      -3.491  -9.020   1.890  2.00  0.00           C  
ATOM   3422  C   CNT A 208      -2.943  -8.415   3.030  0.00  0.00           C  
ATOM   3423  C   CNT A 208      -1.364 -10.161   1.490  1.00  0.00           C  
ATOM   3424  C   CNT A 208      -0.766  -9.317   2.430  0.00  0.00           C  
ATOM   3425  C   CNT A 208      -1.528  -8.455   3.250  6.00  0.00           C  
ATOM   3426  C   CNT A 208      -0.890  -7.331   3.810  9.00  0.00           C  
ATOM   3427  C   CNT A 208       0.606  -9.063   2.260  7.00  0.00           C  
ATOM   3428  C   CNT A 208       1.136  -7.755   2.500  3.00  0.00           C  
ATOM   3429  C   CNT A 208       0.362  -6.843   3.250  3.00  0.00           C  
ATOM   3430  C   CNT A 208       0.511  -5.471   3.160  9.00  0.00           C  
ATOM   3431  C   CNT A 208       2.024  -7.260   1.560  0.00  0.00           C  
ATOM   3432  C   CNT A 208       1.891  -5.924   1.180  0.00  0.00           C  
ATOM   3433  C   CNT A 208       1.175  -5.000   2.020  1.00  0.00           C  
ATOM   3434  C   CNT A 208       0.939  -3.717   1.570  3.00  0.00           C  
ATOM   3435  C   CNT A 208       2.434  -5.453  -0.010  1.00  0.00           C  
ATOM   3436  C   CNT A 208       1.815  -4.354  -0.610  1.00  0.00           C  
ATOM   3437  C   CNT A 208       1.100  -3.448   0.170  5.00  0.00           C  
ATOM   3438  C   CNT A 208       0.056  -2.709  -0.370  8.00  0.00           C  
ATOM   3439  C   CNT A 208       1.730  -4.359  -2.010  0.00  0.00           C  
ATOM   3440  C   CNT A 208       0.569  -3.748  -2.540  8.00  0.00           C  
ATOM   3441  C   CNT A 208      -0.268  -2.897  -1.770  0.00  0.00           C  
ATOM   3442  C   CNT A 208      -1.658  -2.737  -2.080  5.00  0.00           C  
ATOM   3443  C   CNT A 208      -0.032  -4.447  -3.630  7.00  0.00           C  
ATOM   3444  C   CNT A 208      -1.414  -4.526  -3.650  2.00  0.00           C  
ATOM   3445  C   CNT A 208      -2.234  -3.680  -2.950  7.00  0.00           C  
ATOM   3446  C   CNT A 208      -3.617  -3.927  -2.770  5.00  0.00           C  
ATOM   3447  C   CNT A 208      -2.004  -5.657  -4.200  6.00  0.00           C  
ATOM   3448  C   CNT A 208      -3.230  -6.105  -3.700  2.00  0.00           C  
ATOM   3449  C   CNT A 208      -4.083  -5.204  -3.080  4.00  0.00           C  
ATOM   3450  C   CNT A 208      -5.229  -5.675  -2.390  8.00  0.00           C  
ATOM   3451  C   CNT A 208      -5.866  -4.828  -1.480  3.00  0.00           C  
ATOM   3452  C   CNT A 208      -6.488  -5.309  -0.310  6.00  0.00           C  
ATOM   3453  C   CNT A 208      -7.333  -4.512   0.420  3.00  0.00           C  
ATOM   3454  C   CNT A 208      -7.756  -4.929   1.700  3.00  0.00           C  
ATOM   3455  C   CNT A 208      -6.085  -6.518   0.200  9.00  0.00           C  
ATOM   3456  C   CNT A 208      -6.444  -6.916   1.500  4.00  0.00           C  
ATOM   3457  C   CNT A 208      -7.247  -6.087   2.290  3.00  0.00           C  
ATOM   3458  C   CNT A 208      -7.121  -6.058   3.720  2.00  0.00           C  
ATOM   3459  C   CNT A 208      -5.479  -7.666   2.180  4.00  0.00           C  
ATOM   3460  C   CNT A 208      -5.063  -7.329   3.460  0.00  0.00           C  
ATOM   3461  C   CNT A 208      -5.859  -6.523   4.230  7.00  0.00           C  
ATOM   3462  C   CNT A 208      -5.310  -5.878   5.370  7.00  0.00           C  
ATOM   3463  C   CNT A 208      -3.721  -7.587   3.820  5.00  0.00           C  
ATOM   3464  C   CNT A 208      -3.075  -6.803   4.850  1.00  0.00           C  
ATOM   3465  C   CNT A 208      -3.911  -5.922   5.590  7.00  0.00           C  
ATOM   3466  C   CNT A 208      -3.318  -4.749   6.100  3.00  0.00           C  
ATOM   3467  C   CNT A 208      -1.733  -6.461   4.600  5.00  0.00           C  
ATOM   3468  C   CNT A 208      -1.362  -5.120   4.630  6.00  0.00           C  
ATOM   3469  C   CNT A 208      -2.115  -4.277   5.480  6.00  0.00           C  
ATOM   3470  C   CNT A 208      -1.892  -2.901   5.520  4.00  0.00           C  
ATOM   3471  C   CNT A 208      -0.315  -4.590   3.850  7.00  0.00           C  
ATOM   3472  C   CNT A 208      -0.288  -3.198   3.600  6.00  0.00           C  
ATOM   3473  C   CNT A 208      -1.128  -2.395   4.380  0.00  0.00           C  
ATOM   3474  C   CNT A 208      -1.493  -1.161   3.860  5.00  0.00           C  
ATOM   3475  C   CNT A 208       0.102  -2.870   2.320  1.00  0.00           C  
ATOM   3476  C   CNT A 208      -0.610  -1.833   1.740  3.00  0.00           C  
ATOM   3477  C   CNT A 208      -1.429  -0.939   2.500  2.00  0.00           C  
ATOM   3478  C   CNT A 208      -2.312  -0.038   1.850  2.00  0.00           C  
ATOM   3479  C   CNT A 208      -0.745  -1.864   0.360  8.00  0.00           C  
ATOM   3480  C   CNT A 208      -1.851  -1.213  -0.220  2.00  0.00           C  
ATOM   3481  C   CNT A 208      -2.632  -0.262   0.510  3.00  0.00           C  
ATOM   3482  C   CNT A 208      -3.979  -0.098   0.210  3.00  0.00           C  
ATOM   3483  C   CNT A 208      -2.416  -1.811  -1.370  2.00  0.00           C  
ATOM   3484  C   CNT A 208      -3.834  -1.882  -1.400  6.00  0.00           C  
ATOM   3485  C   CNT A 208      -4.578  -1.059  -0.570  9.00  0.00           C  
ATOM   3486  C   CNT A 208      -5.956  -1.269  -0.410  8.00  0.00           C  
ATOM   3487  C   CNT A 208      -4.418  -2.959  -2.070  0.00  0.00           C  
ATOM   3488  C   CNT A 208      -5.667  -3.430  -1.570  1.00  0.00           C  
ATOM   3489  C   CNT A 208      -6.412  -2.574  -0.690  0.00  0.00           C  
ATOM   3490  C   CNT A 208      -7.438  -3.150   0.100  4.00  0.00           C  
ATOM   3491  C   CNT A 208      -8.166  -2.319   0.940  1.00  0.00           C  
ATOM   3492  C   CNT A 208      -8.965  -2.813   2.000  3.00  0.00           C  
ATOM   3493  C   CNT A 208      -9.628  -1.865   2.810  9.00  0.00           C  
ATOM   3494  C   CNT A 208     -10.189  -2.290   4.020  8.00  0.00           C  
ATOM   3495  C   CNT A 208      -8.608  -4.050   2.490  6.00  0.00           C  
ATOM   3496  C   CNT A 208      -8.827  -4.338   3.820  7.00  0.00           C  
ATOM   3497  C   CNT A 208      -9.637  -3.409   4.610  8.00  0.00           C  
ATOM   3498  C   CNT A 208      -9.431  -3.374   6.050  5.00  0.00           C  
ATOM   3499  C   CNT A 208      -7.881  -5.153   4.490  3.00  0.00           C  
ATOM   3500  C   CNT A 208      -7.471  -4.797   5.810  5.00  0.00           C  
ATOM   3501  C   CNT A 208      -8.202  -3.920   6.570  4.00  0.00           C  
ATOM   3502  C   CNT A 208      -7.615  -3.187   7.620  1.00  0.00           C  
ATOM   3503  C   CNT A 208      -6.115  -5.039   6.190  3.00  0.00           C  
ATOM   3504  C   CNT A 208      -5.470  -4.190   7.090  7.00  0.00           C  
ATOM   3505  C   CNT A 208      -6.248  -3.230   7.750  5.00  0.00           C  
ATOM   3506  C   CNT A 208      -5.637  -2.206   8.440  5.00  0.00           C  
ATOM   3507  C   CNT A 208      -4.067  -3.906   6.940  6.00  0.00           C  
ATOM   3508  C   CNT A 208      -3.608  -2.598   7.240  8.00  0.00           C  
ATOM   3509  C   CNT A 208      -4.437  -1.707   7.910  5.00  0.00           C  
ATOM   3510  C   CNT A 208      -4.295  -0.335   7.720  6.00  0.00           C  
ATOM   3511  C   CNT A 208      -2.671  -2.027   6.300  6.00  0.00           C  
ATOM   3512  C   CNT A 208      -2.630  -0.665   5.990  2.00  0.00           C  
ATOM   3513  C   CNT A 208      -3.491   0.176   6.720  6.00  0.00           C  
ATOM   3514  C   CNT A 208      -3.806   1.439   6.300  1.00  0.00           C  
ATOM   3515  C   CNT A 208      -2.249  -0.277   4.610  9.00  0.00           C  
ATOM   3516  C   CNT A 208      -2.992   0.812   4.070  2.00  0.00           C  
ATOM   3517  C   CNT A 208      -3.701   1.692   4.880  0.00  0.00           C  
ATOM   3518  C   CNT A 208      -4.597   2.562   4.250  7.00  0.00           C  
ATOM   3519  C   CNT A 208      -3.131   0.745   2.690  3.00  0.00           C  
ATOM   3520  C   CNT A 208      -4.288   1.319   2.140  8.00  0.00           C  
ATOM   3521  C   CNT A 208      -5.063   2.146   2.980  3.00  0.00           C  
ATOM   3522  C   CNT A 208      -6.439   2.276   2.690  1.00  0.00           C  
ATOM   3523  C   CNT A 208      -4.836   0.792   1.000  8.00  0.00           C  
ATOM   3524  C   CNT A 208      -6.195   0.714   0.900  5.00  0.00           C  
ATOM   3525  C   CNT A 208      -7.027   1.532   1.660  4.00  0.00           C  
ATOM   3526  C   CNT A 208      -8.375   1.288   1.720  6.00  0.00           C  
ATOM   3527  C   CNT A 208      -6.763  -0.410   0.330  9.00  0.00           C  
ATOM   3528  C   CNT A 208      -7.925  -0.915   0.900  0.00  0.00           C  
ATOM   3529  C   CNT A 208      -8.776   0.012   1.510  9.00  0.00           C  
ATOM   3530  C   CNT A 208      -9.721  -0.549   2.420  3.00  0.00           C  
ATOM   3531  C   CNT A 208     -10.573   0.246   3.190  6.00  0.00           C  
ATOM   3532  C   CNT A 208     -11.335  -0.149   4.290  5.00  0.00           C  
ATOM   3533  C   CNT A 208     -12.154   0.709   5.030  1.00  0.00           C  
ATOM   3534  C   CNT A 208     -12.518   0.320   6.330  5.00  0.00           C  
ATOM   3535  C   CNT A 208     -11.001  -1.456   4.790  6.00  0.00           C  
ATOM   3536  C   CNT A 208     -11.218  -1.714   6.200  7.00  0.00           C  
ATOM   3537  C   CNT A 208     -11.876  -0.765   6.940  0.00  0.00           C  
ATOM   3538  C   CNT A 208     -11.659  -0.695   8.340  5.00  0.00           C  
ATOM   3539  C   CNT A 208     -10.159  -2.465   6.780  1.00  0.00           C  
ATOM   3540  C   CNT A 208      -9.790  -2.165   8.070  5.00  0.00           C  
ATOM   3541  C   CNT A 208     -10.536  -1.231   8.870  3.00  0.00           C  
ATOM   3542  C   CNT A 208      -9.957  -0.693  10.050  0.00  0.00           C  
ATOM   3543  C   CNT A 208      -8.455  -2.419   8.460  0.00  0.00           C  
ATOM   3544  C   CNT A 208      -7.754  -1.614   9.410  8.00  0.00           C  
ATOM   3545  C   CNT A 208      -8.534  -0.744  10.220  7.00  0.00           C  
ATOM   3546  C   CNT A 208      -7.919   0.323  10.860  8.00  0.00           C  
ATOM   3547  C   CNT A 208      -6.419  -1.294   9.200  6.00  0.00           C  
ATOM   3548  C   CNT A 208      -6.057   0.006   9.410  7.00  0.00           C  
ATOM   3549  C   CNT A 208      -6.760   0.864  10.250  9.00  0.00           C  
ATOM   3550  C   CNT A 208      -6.525   2.214  10.150  2.00  0.00           C  
ATOM   3551  C   CNT A 208      -5.044   0.500   8.590  0.00  0.00           C  
ATOM   3552  C   CNT A 208      -5.085   1.850   8.260  7.00  0.00           C  
ATOM   3553  C   CNT A 208      -5.797   2.709   9.050  9.00  0.00           C  
ATOM   3554  C   CNT A 208      -6.247   3.926   8.530  9.00  0.00           C  
ATOM   3555  C   CNT A 208      -4.678   2.238   7.040  6.00  0.00           C  
ATOM   3556  C   CNT A 208      -5.261   3.391   6.420  9.00  0.00           C  
ATOM   3557  C   CNT A 208      -6.058   4.235   7.200  3.00  0.00           C  
ATOM   3558  C   CNT A 208      -6.993   5.075   6.540  5.00  0.00           C  
ATOM   3559  C   CNT A 208      -5.465   3.337   5.050  4.00  0.00           C  
ATOM   3560  C   CNT A 208      -6.630   3.840   4.510  5.00  0.00           C  
ATOM   3561  C   CNT A 208      -7.372   4.749   5.240  2.00  0.00           C  
ATOM   3562  C   CNT A 208      -8.721   4.995   4.860  3.00  0.00           C  
ATOM   3563  C   CNT A 208      -7.168   3.241   3.370  2.00  0.00           C  
ATOM   3564  C   CNT A 208      -8.555   3.248   3.200  1.00  0.00           C  
ATOM   3565  C   CNT A 208      -9.329   4.060   4.000  5.00  0.00           C  
ATOM   3566  C   CNT A 208     -10.692   3.823   4.060  9.00  0.00           C  
ATOM   3567  C   CNT A 208      -9.147   2.175   2.490  9.00  0.00           C  
ATOM   3568  C   CNT A 208     -10.349   1.647   3.100  2.00  0.00           C  
ATOM   3569  C   CNT A 208     -11.155   2.516   3.860  4.00  0.00           C  
ATOM   3570  C   CNT A 208     -12.316   2.043   4.600  8.00  0.00           C  
ATOM   3571  C   CNT A 208     -13.048   2.922   5.420  0.00  0.00           C  
ATOM   3572  C   CNT A 208     -13.771   2.423   6.560  3.00  0.00           C  
ATOM   3573  C   CNT A 208     -14.476   3.339   7.330  9.00  0.00           C  
ATOM   3574  C   CNT A 208     -14.845   2.908   8.620  3.00  0.00           C  
ATOM   3575  C   CNT A 208     -13.324   1.198   7.080  5.00  0.00           C  
ATOM   3576  C   CNT A 208     -13.289   1.066   8.510  9.00  0.00           C  
ATOM   3577  C   CNT A 208     -14.088   1.902   9.290  2.00  0.00           C  
ATOM   3578  C   CNT A 208     -13.948   1.923  10.700  3.00  0.00           C  
ATOM   3579  C   CNT A 208     -12.314   0.293   9.110  7.00  0.00           C  
ATOM   3580  C   CNT A 208     -11.946   0.601  10.390  8.00  0.00           C  
ATOM   3581  C   CNT A 208     -12.761   1.380  11.210  6.00  0.00           C  
ATOM   3582  C   CNT A 208     -12.219   1.911  12.410  6.00  0.00           C  
ATOM   3583  C   CNT A 208     -10.731   0.084  10.920  3.00  0.00           C  
ATOM   3584  C   CNT A 208     -10.035   0.908  11.820  7.00  0.00           C  
ATOM   3585  C   CNT A 208     -10.807   1.829  12.560  5.00  0.00           C  
ATOM   3586  C   CNT A 208     -10.196   2.957  13.220  2.00  0.00           C  
ATOM   3587  C   CNT A 208      -8.693   1.194  11.660  5.00  0.00           C  
ATOM   3588  C   CNT A 208      -8.307   2.551  11.800  0.00  0.00           C  
ATOM   3589  C   CNT A 208      -9.004   3.426  12.640  2.00  0.00           C  
ATOM   3590  C   CNT A 208      -8.689   4.792  12.630  9.00  0.00           C  
ATOM   3591  C   CNT A 208      -7.275   3.067  10.950  5.00  0.00           C  
ATOM   3592  C   CNT A 208      -7.310   4.464  10.650  3.00  0.00           C  
ATOM   3593  C   CNT A 208      -8.063   5.299  11.480  3.00  0.00           C  
ATOM   3594  C   CNT A 208      -8.541   6.474  10.870  4.00  0.00           C  
ATOM   3595  C   CNT A 208      -6.938   4.853   9.330  6.00  0.00           C  
ATOM   3596  C   CNT A 208      -7.775   5.752   8.710  3.00  0.00           C  
ATOM   3597  C   CNT A 208      -8.471   6.665   9.480  6.00  0.00           C  
ATOM   3598  C   CNT A 208      -9.418   7.540   8.900  8.00  0.00           C  
ATOM   3599  C   CNT A 208      -7.831   5.818   7.360  0.00  0.00           C  
ATOM   3600  C   CNT A 208      -8.985   6.387   6.830  3.00  0.00           C  
ATOM   3601  C   CNT A 208      -9.797   7.264   7.570  5.00  0.00           C  
ATOM   3602  C   CNT A 208     -11.094   7.575   7.140  5.00  0.00           C  
ATOM   3603  C   CNT A 208      -9.504   5.854   5.600  6.00  0.00           C  
ATOM   3604  C   CNT A 208     -10.865   5.901   5.370  9.00  0.00           C  
ATOM   3605  C   CNT A 208     -11.692   6.743   6.180  4.00  0.00           C  
ATOM   3606  C   CNT A 208     -13.111   6.566   6.280  3.00  0.00           C  
ATOM   3607  C   CNT A 208     -11.531   4.751   4.840  3.00  0.00           C  
ATOM   3608  C   CNT A 208     -12.700   4.272   5.390  9.00  0.00           C  
ATOM   3609  C   CNT A 208     -13.498   5.168   6.130  4.00  0.00           C  
ATOM   3610  C   CNT A 208     -14.453   4.720   7.080  0.00  0.00           C  
ATOM   3611  C   CNT A 208     -15.305   5.579   7.810  3.00  0.00           C  
ATOM   3612  C   CNT A 208     -15.985   5.036   8.860  4.00  0.00           C  
ATOM   3613  C   CNT A 208     -16.787   5.866   9.660  6.00  0.00           C  
ATOM   3614  C   CNT A 208     -17.154   5.447  10.960  1.00  0.00           C  
ATOM   3615  C   CNT A 208     -15.554   3.851   9.450  4.00  0.00           C  
ATOM   3616  C   CNT A 208     -15.571   3.652  10.840  9.00  0.00           C  
ATOM   3617  C   CNT A 208     -16.422   4.438  11.630  7.00  0.00           C  
ATOM   3618  C   CNT A 208     -16.318   4.433  13.030  5.00  0.00           C  
ATOM   3619  C   CNT A 208     -14.726   2.776  11.490  1.00  0.00           C  
ATOM   3620  C   CNT A 208     -14.291   3.105  12.790  5.00  0.00           C  
ATOM   3621  C   CNT A 208     -15.142   3.860  13.580  2.00  0.00           C  
ATOM   3622  C   CNT A 208     -14.635   4.453  14.800  0.00  0.00           C  
ATOM   3623  C   CNT A 208     -12.998   2.770  13.190  0.00  0.00           C  
ATOM   3624  C   CNT A 208     -12.340   3.648  14.130  0.00  0.00           C  
ATOM   3625  C   CNT A 208     -13.150   4.435  14.960  3.00  0.00           C  
ATOM   3626  C   CNT A 208     -12.612   5.655  15.440  6.00  0.00           C  
ATOM   3627  C   CNT A 208     -10.959   3.867  14.020  3.00  0.00           C  
ATOM   3628  C   CNT A 208     -10.582   5.211  14.210  8.00  0.00           C  
ATOM   3629  C   CNT A 208     -11.375   6.076  14.960  1.00  0.00           C  
ATOM   3630  C   CNT A 208     -11.163   7.447  14.830  1.00  0.00           C  
ATOM   3631  C   CNT A 208      -9.445   5.692  13.450  1.00  0.00           C  
ATOM   3632  C   CNT A 208      -9.530   7.080  13.010  3.00  0.00           C  
ATOM   3633  C   CNT A 208     -10.436   7.935  13.690  7.00  0.00           C  
ATOM   3634  C   CNT A 208     -10.701   9.209  13.190  0.00  0.00           C  
ATOM   3635  C   CNT A 208      -9.275   7.443  11.650  6.00  0.00           C  
ATOM   3636  C   CNT A 208      -9.989   8.454  11.000  6.00  0.00           C  
ATOM   3637  C   CNT A 208     -10.705   9.397  11.780  8.00  0.00           C  
ATOM   3638  C   CNT A 208     -11.687  10.265  11.180  5.00  0.00           C  
ATOM   3639  C   CNT A 208     -10.177   8.456   9.620  0.00  0.00           C  
ATOM   3640  C   CNT A 208     -11.291   9.093   9.030  4.00  0.00           C  
ATOM   3641  C   CNT A 208     -12.055   9.981   9.840  7.00  0.00           C  
ATOM   3642  C   CNT A 208     -13.389  10.247   9.470  9.00  0.00           C  
ATOM   3643  C   CNT A 208     -11.861   8.468   7.890  4.00  0.00           C  
ATOM   3644  C   CNT A 208     -13.257   8.572   7.710  3.00  0.00           C  
ATOM   3645  C   CNT A 208     -14.015   9.331   8.620  1.00  0.00           C  
ATOM   3646  C   CNT A 208     -15.362   9.051   8.810  3.00  0.00           C  
ATOM   3647  C   CNT A 208     -13.901   7.437   7.120  0.00  0.00           C  
ATOM   3648  C   CNT A 208     -15.165   6.967   7.640  0.00  0.00           C  
ATOM   3649  C   CNT A 208     -15.810   7.780   8.520  8.00  0.00           C  
ATOM   3650  C   CNT A 208     -16.800   7.259   9.360  6.00  0.00           C  
ATOM   3651  C   CNT A 208     -17.661   8.085  10.110  2.00  0.00           C  
ATOM   3652  C   CNT A 208     -18.397   7.509  11.180  5.00  0.00           C  
ATOM   3653  C   CNT A 208     -19.255   8.357  11.970  4.00  0.00           C  
ATOM   3654  C   CNT A 208     -19.664   7.997  13.260  6.00  0.00           C  
ATOM   3655  C   CNT A 208     -17.971   6.329  11.690  0.00  0.00           C  
ATOM   3656  C   CNT A 208     -18.183   6.062  13.090  5.00  0.00           C  
ATOM   3657  C   CNT A 208     -18.983   6.937  13.920  6.00  0.00           C  
ATOM   3658  C   CNT A 208     -18.749   6.996  15.300  2.00  0.00           C  
ATOM   3659  C   CNT A 208     -17.218   5.232  13.780  1.00  0.00           C  
ATOM   3660  C   CNT A 208     -16.839   5.560  15.090  2.00  0.00           C  
ATOM   3661  C   CNT A 208     -17.560   6.529  15.810  8.00  0.00           C  
ATOM   3662  C   CNT A 208     -16.994   7.034  17.060  2.00  0.00           C  
ATOM   3663  C   CNT A 208     -15.477   5.370  15.490  4.00  0.00           C  
ATOM   3664  C   CNT A 208     -14.836   6.250  16.340  5.00  0.00           C  
ATOM   3665  C   CNT A 208     -15.572   7.115  17.130  6.00  0.00           C  
ATOM   3666  C   CNT A 208     -14.977   8.200  17.720  7.00  0.00           C  
ATOM   3667  C   CNT A 208     -13.495   6.497  16.060  3.00  0.00           C  
ATOM   3668  C   CNT A 208     -13.029   7.805  16.310  0.00  0.00           C  
ATOM   3669  C   CNT A 208     -13.784   8.703  17.190  3.00  0.00           C  
ATOM   3670  C   CNT A 208     -13.560  10.037  16.970  4.00  0.00           C  
ATOM   3671  C   CNT A 208     -12.024   8.336  15.490  8.00  0.00           C  
ATOM   3672  C   CNT A 208     -12.032   9.730  15.190  4.00  0.00           C  
ATOM   3673  C   CNT A 208     -12.791  10.597  15.950  5.00  0.00           C  
ATOM   3674  C   CNT A 208     -13.015  11.898  15.510  6.00  0.00           C  
ATOM   3675  C   CNT A 208     -11.545  10.055  13.910  8.00  0.00           C  
ATOM   3676  C   CNT A 208     -12.185  11.195  13.310  3.00  0.00           C  
ATOM   3677  C   CNT A 208     -12.900  12.090  14.130  4.00  0.00           C  
ATOM   3678  C   CNT A 208     -13.848  12.944  13.510  3.00  0.00           C  
ATOM   3679  C   CNT A 208     -12.335  11.297  11.920  4.00  0.00           C  
ATOM   3680  C   CNT A 208     -13.556  11.803  11.390  2.00  0.00           C  
ATOM   3681  C   CNT A 208     -14.342  12.627  12.200  0.00  0.00           C  
ATOM   3682  C   CNT A 208     -15.720  12.751  11.990  3.00  0.00           C  
ATOM   3683  C   CNT A 208     -14.157  11.081  10.310  0.00  0.00           C  
ATOM   3684  C   CNT A 208     -15.599  11.044  10.220  9.00  0.00           C  
ATOM   3685  C   CNT A 208     -16.359  11.856  11.110  0.00  0.00           C  
ATOM   3686  C   CNT A 208     -17.741  11.620  11.170  9.00  0.00           C  
ATOM   3687  C   CNT A 208     -16.170   9.881   9.600  7.00  0.00           C  
ATOM   3688  C   CNT A 208     -17.407   9.441  10.140  0.00  0.00           C  
ATOM   3689  C   CNT A 208     -18.152  10.290  10.970  0.00  0.00           C  
ATOM   3690  C   CNT A 208     -19.202   9.759  11.710  9.00  0.00           C  
ATOM   3691  C   CNT A 208     -20.010  10.636  12.480  1.00  0.00           C  
ATOM   3692  C   CNT A 208     -20.806  10.190  13.490  5.00  0.00           C  
ATOM   3693  C   CNT A 208     -21.613  10.987  14.260  6.00  0.00           C  
ATOM   3694  C   CNT A 208     -22.025  10.630  15.550  9.00  0.00           C  
ATOM   3695  C   CNT A 208     -20.347   8.965  14.060  0.00  0.00           C  
ATOM   3696  C   CNT A 208     -20.468   8.733  15.430  3.00  0.00           C  
ATOM   3697  C   CNT A 208     -21.260   9.616  16.210  1.00  0.00           C  
ATOM   3698  C   CNT A 208     -21.045   9.615  17.560  9.00  0.00           C  
ATOM   3699  C   CNT A 208     -19.494   7.938  16.020  8.00  0.00           C  
ATOM   3700  C   CNT A 208     -19.036   8.375  17.280  8.00  0.00           C  
ATOM   3701  C   CNT A 208     -19.830   9.158  18.100  0.00  0.00           C  
ATOM   3702  C   CNT A 208     -19.236   9.754  19.240  7.00  0.00           C  
ATOM   3703  C   CNT A 208     -17.703   8.122  17.610  8.00  0.00           C  
ATOM   3704  C   CNT A 208     -17.090   9.011  18.510  7.00  0.00           C  
ATOM   3705  C   CNT A 208     -17.856   9.819  19.330  4.00  0.00           C  
ATOM   3706  C   CNT A 208     -17.222  10.913  19.970  8.00  0.00           C  
ATOM   3707  C   CNT A 208     -15.722   9.161  18.420  8.00  0.00           C  
ATOM   3708  C   CNT A 208     -15.139  10.422  18.710  6.00  0.00           C  
ATOM   3709  C   CNT A 208     -15.993  11.345  19.390  3.00  0.00           C  
ATOM   3710  C   CNT A 208     -15.651  12.783  19.490  3.00  0.00           C  
ATOM   3711  C   CNT A 208     -14.133  10.971  17.880  4.00  0.00           C  
ATOM   3712  C   CNT A 208     -14.140  12.317  17.640  5.00  0.00           C  
ATOM   3713  C   CNT A 208     -14.814  13.280  18.480  6.00  0.00           C  
ATOM   3714  C   CNT A 208     -15.184  14.524  17.900  4.00  0.00           C  
ATOM   3715  C   CNT A 208     -13.817  12.722  16.300  7.00  0.00           C  
ATOM   3716  C   CNT A 208     -14.550  13.764  15.710  5.00  0.00           C  
ATOM   3717  C   CNT A 208     -15.231  14.702  16.480  0.00  0.00           C  
ATOM   3718  C   CNT A 208     -16.227  15.488  15.920  9.00  0.00           C  
ATOM   3719  C   CNT A 208     -14.721  13.667  14.320  5.00  0.00           C  
ATOM   3720  C   CNT A 208     -15.843  14.286  13.790  7.00  0.00           C  
ATOM   3721  C   CNT A 208     -16.659  15.052  14.660  2.00  0.00           C  
ATOM   3722  C   CNT A 208     -18.004  15.330  14.260  0.00  0.00           C  
ATOM   3723  C   CNT A 208     -16.472  13.644  12.690  9.00  0.00           C  
ATOM   3724  C   CNT A 208     -17.826  13.533  12.690  2.00  0.00           C  
ATOM   3725  C   CNT A 208     -18.611  14.393  13.430  7.00  0.00           C  
ATOM   3726  C   CNT A 208     -19.965  14.140  13.550  7.00  0.00           C  
ATOM   3727  C   CNT A 208     -18.452  12.407  12.080  4.00  0.00           C  
ATOM   3728  C   CNT A 208     -19.699  11.999  12.490  6.00  0.00           C  
ATOM   3729  C   CNT A 208     -20.399  12.854  13.350  9.00  0.00           C  
ATOM   3730  C   CNT A 208     -21.530  12.376  14.040  1.00  0.00           C  
ATOM   3731  C   CNT A 208     -22.316  13.241  14.850  8.00  0.00           C  
ATOM   3732  C   CNT A 208     -23.153  12.742  15.910  4.00  0.00           C  
ATOM   3733  C   CNT A 208     -23.884  13.620  16.700  9.00  0.00           C  
ATOM   3734  C   CNT A 208     -24.274  13.282  17.960  0.00  0.00           C  
ATOM   3735  C   CNT A 208     -22.763  11.488  16.370  4.00  0.00           C  
ATOM   3736  C   CNT A 208     -22.811  11.257  17.780  8.00  0.00           C  
ATOM   3737  C   CNT A 208     -23.565  12.142  18.530  3.00  0.00           C  
ATOM   3738  C   CNT A 208     -23.399  12.163  19.930  1.00  0.00           C  
ATOM   3739  C   CNT A 208     -21.694  10.605  18.370  1.00  0.00           C  
ATOM   3740  C   CNT A 208     -21.327  10.906  19.640  5.00  0.00           C  
ATOM   3741  C   CNT A 208     -22.175  11.747  20.440  5.00  0.00           C  
ATOM   3742  C   CNT A 208     -21.553  12.455  21.540  6.00  0.00           C  
ATOM   3743  C   CNT A 208     -20.047  10.627  20.040  5.00  0.00           C  
ATOM   3744  C   CNT A 208     -19.389  11.562  20.930  2.00  0.00           C  
ATOM   3745  C   CNT A 208     -20.142  12.528  21.570  8.00  0.00           C  
ATOM   3746  C   CNT A 208     -19.578  13.583  22.220  4.00  0.00           C  
ATOM   3747  C   CNT A 208     -18.016  11.776  20.780  5.00  0.00           C  
ATOM   3748  C   CNT A 208     -17.540  13.049  21.060  7.00  0.00           C  
ATOM   3749  C   CNT A 208     -18.324  13.970  21.810  3.00  0.00           C  
ATOM   3750  C   CNT A 208     -18.000  15.337  21.830  1.00  0.00           C  
ATOM   3751  C   CNT A 208     -16.470  13.612  20.220  1.00  0.00           C  
ATOM   3752  C   CNT A 208     -16.471  14.994  19.950  1.00  0.00           C  
ATOM   3753  C   CNT A 208     -17.214  15.867  20.760  3.00  0.00           C  
ATOM   3754  C   CNT A 208     -17.558  17.138  20.230  3.00  0.00           C  
ATOM   3755  C   CNT A 208     -16.032  15.375  18.650  6.00  0.00           C  
ATOM   3756  C   CNT A 208     -16.818  16.410  18.060  6.00  0.00           C  
ATOM   3757  C   CNT A 208     -17.497  17.321  18.830  7.00  0.00           C  
ATOM   3758  C   CNT A 208     -18.474  18.089  18.220  0.00  0.00           C  
ATOM   3759  C   CNT A 208     -16.955  16.435  16.640  2.00  0.00           C  
ATOM   3760  C   CNT A 208     -18.191  16.894  16.150  2.00  0.00           C  
ATOM   3761  C   CNT A 208     -18.985  17.680  16.930  8.00  0.00           C  
ATOM   3762  C   CNT A 208     -20.328  17.859  16.650  4.00  0.00           C  
ATOM   3763  C   CNT A 208     -18.802  16.222  15.040  3.00  0.00           C  
ATOM   3764  C   CNT A 208     -20.170  16.039  15.010  9.00  0.00           C  
ATOM   3765  C   CNT A 208     -20.956  16.979  15.770  9.00  0.00           C  
ATOM   3766  C   CNT A 208     -22.349  16.763  15.870  9.00  0.00           C  
ATOM   3767  C   CNT A 208     -20.747  14.988  14.290  7.00  0.00           C  
ATOM   3768  C   CNT A 208     -21.999  14.601  14.830  0.00  0.00           C  
ATOM   3769  C   CNT A 208     -22.860  15.487  15.520  9.00  0.00           C  
ATOM   3770  C   CNT A 208     -23.926  14.992  16.340  6.00  0.00           C  
ATOM   3771  C   CNT A 208     -24.662  15.851  17.140  8.00  0.00           C  
ATOM   3772  C   CNT A 208     -25.281  15.401  18.300  3.00  0.00           C  
ATOM   3773  C   CNT A 208     -26.173  16.198  18.990  5.00  0.00           C  
ATOM   3774  C   CNT A 208     -26.614  15.726  20.270  7.00  0.00           C  
ATOM   3775  C   CNT A 208     -24.942  14.103  18.790  3.00  0.00           C  
ATOM   3776  C   CNT A 208     -25.027  13.918  20.160  4.00  0.00           C  
ATOM   3777  C   CNT A 208     -25.848  14.694  20.920  6.00  0.00           C  
ATOM   3778  C   CNT A 208     -25.724  14.721  22.360  9.00  0.00           C  
ATOM   3779  C   CNT A 208     -24.079  13.085  20.680  9.00  0.00           C  
ATOM   3780  C   CNT A 208     -23.728  13.314  22.080  6.00  0.00           C  
ATOM   3781  C   CNT A 208     -24.537  14.165  22.850  0.00  0.00           C  
ATOM   3782  C   CNT A 208     -23.876  14.950  23.910  5.00  0.00           C  
ATOM   3783  C   CNT A 208     -22.341  13.277  22.340  4.00  0.00           C  
ATOM   3784  C   CNT A 208     -21.706  14.220  23.150  4.00  0.00           C  
ATOM   3785  C   CNT A 208     -22.459  15.096  23.950  8.00  0.00           C  
ATOM   3786  C   CNT A 208     -21.882  16.236  24.560  1.00  0.00           C  
ATOM   3787  C   CNT A 208     -20.327  14.492  22.970  4.00  0.00           C  
ATOM   3788  C   CNT A 208     -19.859  15.786  23.340  2.00  0.00           C  
ATOM   3789  C   CNT A 208     -20.618  16.672  24.140  6.00  0.00           C  
ATOM   3790  C   CNT A 208     -20.356  18.025  24.090  5.00  0.00           C  
ATOM   3791  C   CNT A 208     -18.746  16.254  22.610  5.00  0.00           C  
ATOM   3792  C   CNT A 208     -18.695  17.635  22.300  4.00  0.00           C  
ATOM   3793  C   CNT A 208     -19.555  18.545  23.040  9.00  0.00           C  
ATOM   3794  C   CNT A 208     -19.912  19.796  22.500  4.00  0.00           C  
ATOM   3795  C   CNT A 208     -18.261  18.046  21.010  2.00  0.00           C  
ATOM   3796  C   CNT A 208     -18.999  19.057  20.370  1.00  0.00           C  
ATOM   3797  C   CNT A 208     -19.738  20.051  21.110  8.00  0.00           C  
ATOM   3798  C   CNT A 208     -20.819  20.781  20.530  0.00  0.00           C  
ATOM   3799  C   CNT A 208     -19.210  18.952  19.000  1.00  0.00           C  
ATOM   3800  C   CNT A 208     -20.430  19.545  18.420  3.00  0.00           C  
ATOM   3801  C   CNT A 208     -21.239  20.321  19.270  5.00  0.00           C  
ATOM   3802  C   CNT A 208     -22.594  20.456  18.940  1.00  0.00           C  
ATOM   3803  C   CNT A 208     -21.084  18.842  17.310  9.00  0.00           C  
ATOM   3804  C   CNT A 208     -22.427  18.706  17.270  3.00  0.00           C  
ATOM   3805  C   CNT A 208     -23.180  19.559  18.060  2.00  0.00           C  
ATOM   3806  C   CNT A 208     -24.692  19.405  18.110  5.00  0.00           C  
ATOM   3807  C   CNT A 208     -23.073  17.620  16.680  3.00  0.00           C  
ATOM   3808  C   CNT A 208     -24.342  17.243  17.160  5.00  0.00           C  
ATOM   3809  C   CNT A 208     -25.186  18.095  17.850  9.00  0.00           C  
ATOM   3810  C   CNT A 208     -26.134  17.564  18.740  0.00  0.00           C  
ATOM   3811  C   CNT A 208     -26.868  18.450  19.470  9.00  0.00           C  
ATOM   3812  C   CNT A 208     -27.639  17.870  20.510  0.00  0.00           C  
ATOM   3813  C   CNT A 208     -28.382  18.734  21.300  2.00  0.00           C  
ATOM   3814  C   CNT A 208     -28.951  18.296  22.530  3.00  0.00           C  
ATOM   3815  C   CNT A 208     -27.337  16.619  21.000  1.00  0.00           C  
ATOM   3816  C   CNT A 208     -27.380  16.430  22.420  7.00  0.00           C  
ATOM   3817  C   CNT A 208     -28.213  17.219  23.170  3.00  0.00           C  
ATOM   3818  C   CNT A 208     -27.971  17.356  24.520  8.00  0.00           C  
ATOM   3819  C   CNT A 208     -26.472  15.590  23.100  1.00  0.00           C  
ATOM   3820  C   CNT A 208     -25.956  15.970  24.360  7.00  0.00           C  
ATOM   3821  C   CNT A 208     -26.743  16.879  25.060  5.00  0.00           C  
ATOM   3822  C   CNT A 208     -26.137  17.621  26.100  7.00  0.00           C  
ATOM   3823  C   CNT A 208     -24.635  15.727  24.760  0.00  0.00           C  
ATOM   3824  C   CNT A 208     -23.996  16.772  25.600  3.00  0.00           C  
ATOM   3825  C   CNT A 208     -24.807  17.716  26.230  5.00  0.00           C  
ATOM   3826  C   CNT A 208     -24.200  18.832  26.820  0.00  0.00           C  
ATOM   3827  C   CNT A 208     -22.673  17.134  25.260  8.00  0.00           C  
ATOM   3828  C   CNT A 208     -22.194  18.417  25.550  7.00  0.00           C  
ATOM   3829  C   CNT A 208     -22.934  19.296  26.350  4.00  0.00           C  
ATOM   3830  C   CNT A 208     -22.750  20.652  26.380  7.00  0.00           C  
ATOM   3831  C   CNT A 208     -21.101  18.937  24.860  6.00  0.00           C  
ATOM   3832  C   CNT A 208     -21.043  20.320  24.640  0.00  0.00           C  
ATOM   3833  C   CNT A 208     -21.813  21.180  25.450  3.00  0.00           C  
ATOM   3834  C   CNT A 208     -22.263  22.414  24.850  1.00  0.00           C  
ATOM   3835  C   CNT A 208     -20.683  20.673  23.280  1.00  0.00           C  
ATOM   3836  C   CNT A 208     -21.367  21.755  22.660  2.00  0.00           C  
ATOM   3837  C   CNT A 208     -22.259  22.507  23.420  5.00  0.00           C  
ATOM   3838  C   CNT A 208     -23.145  23.375  22.760  5.00  0.00           C  
ATOM   3839  C   CNT A 208     -21.551  21.711  21.260  5.00  0.00           C  
ATOM   3840  C   CNT A 208     -22.753  22.206  20.640  7.00  0.00           C  
ATOM   3841  C   CNT A 208     -23.516  23.152  21.400  7.00  0.00           C  
ATOM   3842  C   CNT A 208     -24.878  23.321  21.020  1.00  0.00           C  
ATOM   3843  C   CNT A 208     -23.333  21.492  19.590  5.00  0.00           C  
ATOM   3844  C   CNT A 208     -24.778  21.463  19.470  8.00  0.00           C  
ATOM   3845  C   CNT A 208     -25.564  22.328  20.230  3.00  0.00           C  
ATOM   3846  C   CNT A 208     -26.834  21.942  20.640  2.00  0.00           C  
ATOM   3847  C   CNT A 208     -25.292  20.274  18.940  3.00  0.00           C  
ATOM   3848  C   CNT A 208     -26.559  19.850  19.460  6.00  0.00           C  
ATOM   3849  C   CNT A 208     -27.359  20.697  20.220  8.00  0.00           C  
ATOM   3850  C   CNT A 208     -28.386  20.119  21.020  9.00  0.00           C  
ATOM   3851  C   CNT A 208     -29.108  21.022  21.850  3.00  0.00           C  
ATOM   3852  C   CNT A 208     -29.986  20.462  22.860  9.00  0.00           C  
ATOM   3853  C   CNT A 208     -30.772  21.272  23.660  5.00  0.00           C  
ATOM   3854  C   CNT A 208     -31.374  20.633  24.690  5.00  0.00           C  
ATOM   3855  C   CNT A 208     -29.658  19.180  23.350  2.00  0.00           C  
ATOM   3856  C   CNT A 208     -29.785  18.903  24.700  8.00  0.00           C  
ATOM   3857  C   CNT A 208     -30.726  19.633  25.490  9.00  0.00           C  
ATOM   3858  C   CNT A 208     -30.676  19.404  26.960  4.00  0.00           C  
ATOM   3859  C   CNT A 208     -28.743  18.183  25.280  9.00  0.00           C  
ATOM   3860  C   CNT A 208     -28.321  18.604  26.540  0.00  0.00           C  
ATOM   3861  C   CNT A 208     -29.288  19.245  27.410  2.00  0.00           C  
ATOM   3862  C   CNT A 208     -28.524  19.939  28.490  3.00  0.00           C  
ATOM   3863  C   CNT A 208     -26.967  18.450  26.910  9.00  0.00           C  
ATOM   3864  C   CNT A 208     -26.319  19.412  27.730  9.00  0.00           C  
ATOM   3865  C   CNT A 208     -27.132  20.268  28.560  8.00  0.00           C  
ATOM   3866  C   CNT A 208     -26.455  21.310  29.210  9.00  0.00           C  
ATOM   3867  C   CNT A 208     -24.991  19.685  27.580  6.00  0.00           C  
ATOM   3868  C   CNT A 208     -24.487  20.935  27.960  2.00  0.00           C  
ATOM   3869  C   CNT A 208     -25.213  21.832  28.760  4.00  0.00           C  
ATOM   3870  C   CNT A 208     -24.779  23.183  28.760  7.00  0.00           C  
ATOM   3871  C   CNT A 208     -23.486  21.564  27.120  7.00  0.00           C  
ATOM   3872  C   CNT A 208     -23.520  22.890  26.760  2.00  0.00           C  
ATOM   3873  C   CNT A 208     -24.349  23.801  27.530  8.00  0.00           C  
ATOM   3874  C   CNT A 208     -24.561  25.089  26.960  5.00  0.00           C  
ATOM   3875  C   CNT A 208     -23.018  23.318  25.560  3.00  0.00           C  
ATOM   3876  C   CNT A 208     -23.701  24.366  24.900  6.00  0.00           C  
ATOM   3877  C   CNT A 208     -24.446  25.316  25.590  4.00  0.00           C  
ATOM   3878  C   CNT A 208     -25.226  26.160  24.840  0.00  0.00           C  
ATOM   3879  C   CNT A 208     -23.942  24.265  23.510  7.00  0.00           C  
ATOM   3880  C   CNT A 208     -25.076  24.888  22.900  5.00  0.00           C  
ATOM   3881  C   CNT A 208     -25.874  25.789  23.660  3.00  0.00           C  
ATOM   3882  C   CNT A 208     -27.123  26.125  23.040  3.00  0.00           C  
ATOM   3883  C   CNT A 208     -25.670  24.158  21.820  6.00  0.00           C  
ATOM   3884  C   CNT A 208     -27.074  24.064  21.770  2.00  0.00           C  
ATOM   3885  C   CNT A 208     -27.861  25.086  22.350  6.00  0.00           C  
ATOM   3886  C   CNT A 208     -29.195  24.630  22.530  0.00  0.00           C  
ATOM   3887  C   CNT A 208     -27.595  22.810  21.480  3.00  0.00           C  
ATOM   3888  C   CNT A 208     -28.874  22.393  21.860  1.00  0.00           C  
ATOM   3889  C   CNT A 208     -29.629  23.293  22.640  9.00  0.00           C  
ATOM   3890  C   CNT A 208     -30.664  22.659  23.400  8.00  0.00           C  
ATOM   3891  N   LIG A 209       8.811 -27.545 -16.040  4.00  0.00           N  
ATOM   3892  N   LIG A 209      18.136 -20.112 -16.160  6.00  0.00           N  
ATOM   3893  N   LIG A 209     -31.357  19.314  29.140  6.00  0.00           N  
ATOM   3894  N   LIG A 209     -28.719  27.568  22.270  9.00  0.00           N  
ATOM   3895  C   LIG A 209       9.099 -26.498 -16.990  4.00  0.00           C  
ATOM   3896  C   LIG A 209      17.007 -19.871 -16.960  1.00  0.00           C  
ATOM   3897  C   LIG A 209     -31.880  19.610  27.870  4.00  0.00           C  
ATOM   3898  C   LIG A 209     -27.674  27.548  23.160  4.00  0.00           C  
ATOM   3899  O   LIG A 209       9.305 -26.069 -18.060  6.00  0.00           O  
ATOM   3900  O   LIG A 209      16.563 -19.677 -18.020  9.00  0.00           O  
ATOM   3901  O   LIG A 209     -32.670  19.913  27.090  8.00  0.00           O  
ATOM   3902  O   LIG A 209     -26.970  28.131  23.870  4.00  0.00           O  
ATOM   3903  C1  LIG A 209       9.196 -28.955 -16.260  0.00  0.00           C  
ATOM   3904  C1  LIG A 209      19.441 -19.704 -16.720  0.00  0.00           C  
ATOM   3905  C1  LIG A 209     -32.376  18.995  30.190  5.00  0.00           C  
ATOM   3906  C1  LIG A 209     -29.798  28.494  22.360  8.00  0.00           C  
ATOM   3907  N1  LIG A 209       9.332 -29.397 -13.770  3.00  0.00           N  
ATOM   3908  N1  LIG A 209      19.143 -17.335 -15.940  4.00  0.00           N  
ATOM   3909  N1  LIG A 209     -30.668  18.677  31.930  1.00  0.00           N  
ATOM   3910  N1  LIG A 209     -31.504  27.095  20.990  2.00  0.00           N  
ATOM   3911  O1  LIG A 209       9.761 -27.903  -9.370  5.00  0.00           O  
ATOM   3912  O1  LIG A 209      17.296 -14.361 -12.980  8.00  0.00           O  
ATOM   3913  O1  LIG A 209     -26.260  19.963  32.410  8.00  0.00           O  
ATOM   3914  O1  LIG A 209     -33.013  22.984  19.590  9.00  0.00           O  
ATOM   3915  C2  LIG A 209       8.680 -29.755 -15.040  7.00  0.00           C  
ATOM   3916  C2  LIG A 209      19.404 -18.182 -17.080  3.00  0.00           C  
ATOM   3917  C2  LIG A 209     -31.809  18.104  31.310  0.00  0.00           C  
ATOM   3918  C2  LIG A 209     -30.568  28.252  21.120  5.00  0.00           C  
ATOM   3919  N2  LIG A 209      10.642 -29.505 -11.930  9.00  0.00           N  
ATOM   3920  N2  LIG A 209      19.646 -16.107 -14.180  0.00  0.00           N  
ATOM   3921  N2  LIG A 209     -29.391  20.065  33.070  3.00  0.00           N  
ATOM   3922  N2  LIG A 209     -33.219  25.715  21.080  8.00  0.00           N  
ATOM   3923  C3  LIG A 209      10.447 -30.010 -13.230  1.00  0.00           C  
ATOM   3924  C3  LIG A 209      20.057 -17.099 -14.970  0.00  0.00           C  
ATOM   3925  C3  LIG A 209     -30.640  19.661  32.820  0.00  0.00           C  
ATOM   3926  C3  LIG A 209     -32.738  26.910  21.450  3.00  0.00           C  
ATOM   3927  N3  LIG A 209       7.612 -27.782 -12.890  9.00  0.00           N  
ATOM   3928  N3  LIG A 209      16.814 -16.568 -16.330  4.00  0.00           N  
ATOM   3929  N3  LIG A 209     -28.969  17.294  30.820  1.00  0.00           N  
ATOM   3930  N3  LIG A 209     -29.937  25.684  19.740  6.00  0.00           N  
ATOM   3931  C4  LIG A 209       9.608 -28.653 -11.710  0.00  0.00           C  
ATOM   3932  C4  LIG A 209      18.307 -15.863 -14.590  3.00  0.00           C  
ATOM   3933  C4  LIG A 209     -28.555  19.204  32.300  5.00  0.00           C  
ATOM   3934  C4  LIG A 209     -32.240  25.132  20.410  7.00  0.00           C  
ATOM   3935  N4  LIG A 209       8.145 -27.161 -10.600  9.00  0.00           N  
ATOM   3936  N4  LIG A 209      16.228 -14.945 -14.750  4.00  0.00           N  
ATOM   3937  N4  LIG A 209     -26.770  18.272  31.230  0.00  0.00           N  
ATOM   3938  N4  LIG A 209     -30.978  23.613  19.080  2.00  0.00           N  
ATOM   3939  C5  LIG A 209       8.787 -28.574 -12.780  0.00  0.00           C  
ATOM   3940  C5  LIG A 209      18.004 -16.633 -15.660  2.00  0.00           C  
ATOM   3941  C5  LIG A 209     -29.388  18.348  31.660  5.00  0.00           C  
ATOM   3942  C5  LIG A 209     -31.146  25.993  20.320  2.00  0.00           C  
ATOM   3943  N5  LIG A 209       6.577 -26.101 -11.760  9.00  0.00           N  
ATOM   3944  N5  LIG A 209      14.984 -15.264 -16.520  8.00  0.00           N  
ATOM   3945  N5  LIG A 209     -27.055  16.478  29.980  8.00  0.00           N  
ATOM   3946  N5  LIG A 209     -28.864  24.108  18.490  1.00  0.00           N  
ATOM   3947  C6  LIG A 209       9.227 -27.907 -10.470  6.00  0.00           C  
ATOM   3948  C6  LIG A 209      17.258 -14.979 -14.040  8.00  0.00           C  
ATOM   3949  C6  LIG A 209     -27.144  19.228  31.980  5.00  0.00           C  
ATOM   3950  C6  LIG A 209     -32.140  23.825  19.720  2.00  0.00           C  
ATOM   3951  C7  LIG A 209       7.481 -27.068 -11.770  5.00  0.00           C  
ATOM   3952  C7  LIG A 209      15.986 -15.714 -15.830  2.00  0.00           C  
ATOM   3953  C7  LIG A 209     -27.660  17.323  30.770  8.00  0.00           C  
ATOM   3954  C7  LIG A 209     -29.984  24.545  19.100  3.00  0.00           C  
ATOM   3955  H   LIG A 209       8.544 -27.330 -15.060  8.00  0.00           H  
ATOM   3956  H   LIG A 209      17.981 -19.806 -15.230  3.00  0.00           H  
ATOM   3957  H   LIG A 209     -30.615  18.690  29.200  1.00  0.00           H  
ATOM   3958  H   LIG A 209     -28.944  26.754  21.760  6.00  0.00           H  
ATOM   3959  H1  LIG A 209      10.302 -29.010 -16.380  6.00  0.00           H  
ATOM   3960  H1  LIG A 209      19.663 -20.320 -17.580  3.00  0.00           H  
ATOM   3961  H1  LIG A 209     -33.119  18.412  29.770  7.00  0.00           H  
ATOM   3962  H1  LIG A 209     -29.381  29.497  22.310  7.00  0.00           H  
ATOM   3963  H2  LIG A 209       8.765 -29.321 -17.160  9.00  0.00           H  
ATOM   3964  H2  LIG A 209      20.232 -19.923 -16.010  0.00  0.00           H  
ATOM   3965  H2  LIG A 209     -32.785  19.900  30.710  2.00  0.00           H  
ATOM   3966  H2  LIG A 209     -30.468  28.329  23.230  6.00  0.00           H  
ATOM   3967  H3  LIG A 209       8.874 -30.815 -15.180  7.00  0.00           H  
ATOM   3968  H3  LIG A 209      18.594 -17.992 -17.890  9.00  0.00           H  
ATOM   3969  H3  LIG A 209     -31.452  17.225  30.790  5.00  0.00           H  
ATOM   3970  H3  LIG A 209     -29.944  28.247  20.300  4.00  0.00           H  
ATOM   3971  H4  LIG A 209       7.613 -29.536 -14.990  3.00  0.00           H  
ATOM   3972  H4  LIG A 209      20.351 -17.815 -17.440  4.00  0.00           H  
ATOM   3973  H4  LIG A 209     -32.495  17.886  32.080  5.00  0.00           H  
ATOM   3974  H4  LIG A 209     -31.150  29.128  20.960  5.00  0.00           H  
ATOM   3975  H5  LIG A 209      10.977 -30.838 -13.710  7.00  0.00           H  
ATOM   3976  H5  LIG A 209      21.067 -17.637 -14.850  1.00  0.00           H  
ATOM   3977  H5  LIG A 209     -31.584  20.051  33.360  7.00  0.00           H  
ATOM   3978  H5  LIG A 209     -33.271  27.639  22.000  2.00  0.00           H  
ATOM   3979  H6  LIG A 209       7.826 -26.855  -9.730  9.00  0.00           H  
ATOM   3980  H6  LIG A 209      15.503 -14.315 -14.410  3.00  0.00           H  
ATOM   3981  H6  LIG A 209     -25.792  18.196  30.940  7.00  0.00           H  
ATOM   3982  H6  LIG A 209     -30.813  22.718  18.790  3.00  0.00           H  
ATOM   3983  H7  LIG A 209       6.282 -25.724 -12.670  3.00  0.00           H  
ATOM   3984  H7  LIG A 209      15.072 -15.509 -17.510  3.00  0.00           H  
ATOM   3985  H7  LIG A 209     -26.215  16.888  29.570  5.00  0.00           H  
ATOM   3986  H7  LIG A 209     -29.045  23.671  17.620  3.00  0.00           H  
ATOM   3987  H8  LIG A 209       6.582 -25.440 -10.990  2.00  0.00           H  
ATOM   3988  H8  LIG A 209      14.853 -14.279 -16.470  1.00  0.00           H  
ATOM   3989  H8  LIG A 209     -27.666  15.987  29.370  2.00  0.00           H  
ATOM   3990  H8  LIG A 209     -28.029  24.613  18.540  2.00  0.00           H  
END
