# Supplementary material for: Molecular Dynamics Study of the Interaction of Carbon Nanotubes with Telomeric DNA Fragment Containing Noncanonical G-Quadruplex and i-Motif Forms
Source: Int J Mol Sci. 2020 Mar 11;21(6):1925. doi: 10.3390/ijms21061925 (PMC7139311; doi:10.3390/ijms21061925)
Supplement: Supplementary file 1 [file ijms-21-01925-s001.zip › fig4_a10.pdb]

ATOM      1  C5' DG5 A   1     -63.928   2.796 -24.020  7.00  0.00           C  
ATOM      2  O5' DG5 A   1     -63.177   1.907 -23.290  0.00  0.00           O  
ATOM      3  C4' DG5 A   1     -64.069   4.183 -23.390  1.00  0.00           C  
ATOM      4  O4' DG5 A   1     -64.771   4.250 -22.170  6.00  0.00           O  
ATOM      5  C3' DG5 A   1     -62.757   4.854 -23.100  9.00  0.00           C  
ATOM      6  O3' DG5 A   1     -62.321   5.350 -24.390  0.00  0.00           O  
ATOM      7  C2' DG5 A   1     -63.178   6.001 -22.230  6.00  0.00           C  
ATOM      8  C1' DG5 A   1     -64.177   5.267 -21.340  6.00  0.00           C  
ATOM      9  N1  DG5 A   1     -62.057   6.696 -16.850  4.00  0.00           N  
ATOM     10  C2  DG5 A   1     -62.445   7.420 -17.930  3.00  0.00           C  
ATOM     11  N2  DG5 A   1     -62.269   8.695 -17.970  4.00  0.00           N  
ATOM     12  N3  DG5 A   1     -63.020   6.944 -19.060  2.00  0.00           N  
ATOM     13  C4  DG5 A   1     -62.979   5.565 -19.030  9.00  0.00           C  
ATOM     14  C5  DG5 A   1     -62.565   4.731 -18.060  1.00  0.00           C  
ATOM     15  C6  DG5 A   1     -61.986   5.382 -16.860  4.00  0.00           C  
ATOM     16  O6  DG5 A   1     -61.643   4.812 -15.820  3.00  0.00           O  
ATOM     17  N7  DG5 A   1     -62.753   3.382 -18.430  7.00  0.00           N  
ATOM     18  C8  DG5 A   1     -63.355   3.415 -19.590  1.00  0.00           C  
ATOM     19  N9  DG5 A   1     -63.460   4.747 -20.080  2.00  0.00           N  
ATOM     20 HO5' DG5 A   1     -63.728   1.236 -22.890  4.00  0.00           H  
ATOM     21  H1  DG5 A   1     -61.542   7.203 -16.140  3.00  0.00           H  
ATOM     22  H8  DG5 A   1     -63.594   2.489 -20.100  6.00  0.00           H  
ATOM     23  H1' DG5 A   1     -64.946   5.926 -21.000  1.00  0.00           H  
ATOM     24  H2' DG5 A   1     -62.335   6.302 -21.730  3.00  0.00           H  
ATOM     25  H21 DG5 A   1     -61.701   9.210 -17.250  8.00  0.00           H  
ATOM     26  H3' DG5 A   1     -61.976   4.229 -22.670  8.00  0.00           H  
ATOM     27  H22 DG5 A   1     -62.709   9.168 -18.750  1.00  0.00           H  
ATOM     28  H4' DG5 A   1     -64.538   4.707 -24.210  3.00  0.00           H  
ATOM     29  H5' DG5 A   1     -64.970   2.537 -24.100  4.00  0.00           H  
ATOM     30 H2'' DG5 A   1     -63.718   6.729 -22.830  0.00  0.00           H  
ATOM     31 H5'' DG5 A   1     -63.412   2.912 -24.930  3.00  0.00           H  
ATOM     32  P    DG A   2     -60.817   5.655 -24.800  3.00  0.00           P  
ATOM     33  C5'  DG A   2     -60.763   8.246 -24.250  1.00  0.00           C  
ATOM     34  O5'  DG A   2     -60.460   6.948 -23.880  2.00  0.00           O  
ATOM     35  C4'  DG A   2     -60.435   9.348 -23.190  5.00  0.00           C  
ATOM     36  O4'  DG A   2     -60.708   9.049 -21.810  5.00  0.00           O  
ATOM     37  C3'  DG A   2     -58.902   9.682 -23.310  0.00  0.00           C  
ATOM     38  O3'  DG A   2     -58.606  11.047 -23.140  3.00  0.00           O  
ATOM     39  C2'  DG A   2     -58.496   8.766 -22.200  5.00  0.00           C  
ATOM     40  C1'  DG A   2     -59.535   9.044 -21.130  7.00  0.00           C  
ATOM     41  N1   DG A   2     -57.997   8.062 -16.500  1.00  0.00           N  
ATOM     42  C2   DG A   2     -58.390   9.253 -17.000  9.00  0.00           C  
ATOM     43  N2   DG A   2     -58.410  10.339 -16.250  8.00  0.00           N  
ATOM     44  N3   DG A   2     -58.787   9.402 -18.290  8.00  0.00           N  
ATOM     45  C4   DG A   2     -58.950   8.158 -18.920  5.00  0.00           C  
ATOM     46  C5   DG A   2     -58.808   6.936 -18.360  4.00  0.00           C  
ATOM     47  C6   DG A   2     -58.256   6.838 -17.070  8.00  0.00           C  
ATOM     48  O6   DG A   2     -57.970   5.841 -16.460  2.00  0.00           O  
ATOM     49  N7   DG A   2     -59.293   5.964 -19.280  4.00  0.00           N  
ATOM     50  C8   DG A   2     -59.687   6.659 -20.330  0.00  0.00           C  
ATOM     51  N9   DG A   2     -59.466   7.999 -20.140  1.00  0.00           N  
ATOM     52  OP1  DG A   2     -60.686   6.095 -26.190  6.00  0.00           O  
ATOM     53  OP2  DG A   2     -59.919   4.541 -24.290  8.00  0.00           O1-
ATOM     54  H1   DG A   2     -57.649   8.009 -15.570  0.00  0.00           H  
ATOM     55  H8   DG A   2     -60.099   6.279 -21.260  7.00  0.00           H  
ATOM     56  H1'  DG A   2     -59.369  10.111 -20.790  4.00  0.00           H  
ATOM     57  H2'  DG A   2     -58.633   7.793 -22.530  1.00  0.00           H  
ATOM     58  H21  DG A   2     -58.086  10.328 -15.290  1.00  0.00           H  
ATOM     59  H3'  DG A   2     -58.491   9.354 -24.260  4.00  0.00           H  
ATOM     60  H22  DG A   2     -59.022  11.094 -16.550  7.00  0.00           H  
ATOM     61  H4'  DG A   2     -60.882  10.249 -23.670  7.00  0.00           H  
ATOM     62  H5'  DG A   2     -61.822   8.276 -24.370  5.00  0.00           H  
ATOM     63 H2''  DG A   2     -57.495   8.795 -21.890  4.00  0.00           H  
ATOM     64 H5''  DG A   2     -60.238   8.424 -25.200  5.00  0.00           H  
ATOM     65  P    DG A   3     -57.081  11.562 -23.230  7.00  0.00           P  
ATOM     66  C5'  DG A   3     -57.205  13.219 -21.150  4.00  0.00           C  
ATOM     67  O5'  DG A   3     -56.768  12.003 -21.740  4.00  0.00           O  
ATOM     68  C4'  DG A   3     -56.758  13.405 -19.680  8.00  0.00           C  
ATOM     69  O4'  DG A   3     -57.009  12.309 -18.800  7.00  0.00           O  
ATOM     70  C3'  DG A   3     -55.264  13.623 -19.490  6.00  0.00           C  
ATOM     71  O3'  DG A   3     -54.991  14.624 -18.550  2.00  0.00           O  
ATOM     72  C2'  DG A   3     -54.711  12.206 -19.260  8.00  0.00           C  
ATOM     73  C1'  DG A   3     -55.757  11.692 -18.290  5.00  0.00           C  
ATOM     74  N1   DG A   3     -53.970   7.723 -15.700  0.00  0.00           N  
ATOM     75  C2   DG A   3     -54.153   9.035 -15.330  7.00  0.00           C  
ATOM     76  N2   DG A   3     -53.577   9.440 -14.230  8.00  0.00           N  
ATOM     77  N3   DG A   3     -54.686   9.925 -16.140  3.00  0.00           N  
ATOM     78  C4   DG A   3     -55.161   9.452 -17.390  1.00  0.00           C  
ATOM     79  C5   DG A   3     -55.004   8.167 -17.830  6.00  0.00           C  
ATOM     80  C6   DG A   3     -54.393   7.224 -16.910  7.00  0.00           C  
ATOM     81  O6   DG A   3     -54.172   6.023 -17.050  1.00  0.00           O  
ATOM     82  N7   DG A   3     -55.507   8.087 -19.160  8.00  0.00           N  
ATOM     83  C8   DG A   3     -55.816   9.345 -19.410  9.00  0.00           C  
ATOM     84  N9   DG A   3     -55.721  10.220 -18.330  0.00  0.00           N  
ATOM     85  OP1  DG A   3     -57.098  12.729 -24.110  7.00  0.00           O  
ATOM     86  OP2  DG A   3     -56.226  10.468 -23.620  9.00  0.00           O1-
ATOM     87  H1   DG A   3     -53.586   7.107 -15.050  9.00  0.00           H  
ATOM     88  H8   DG A   3     -56.149   9.748 -20.370  1.00  0.00           H  
ATOM     89  H1'  DG A   3     -55.626  12.129 -17.310  9.00  0.00           H  
ATOM     90  H2'  DG A   3     -54.661  11.683 -20.180  3.00  0.00           H  
ATOM     91  H21  DG A   3     -53.054   8.800 -13.620  7.00  0.00           H  
ATOM     92  H3'  DG A   3     -54.919  14.052 -20.530  5.00  0.00           H  
ATOM     93  H22  DG A   3     -53.645  10.428 -14.020  7.00  0.00           H  
ATOM     94  H4'  DG A   3     -57.216  14.280 -19.160  1.00  0.00           H  
ATOM     95  H5'  DG A   3     -58.255  13.240 -21.280  7.00  0.00           H  
ATOM     96 H2''  DG A   3     -53.766  12.215 -18.710  2.00  0.00           H  
ATOM     97 H5''  DG A   3     -56.956  14.111 -21.680  9.00  0.00           H  
ATOM     98  P    DT A   4     -53.530  15.234 -18.490  2.00  0.00           P  
ATOM     99  C5'  DT A   4     -53.199  13.906 -16.230  9.00  0.00           C  
ATOM    100  O5'  DT A   4     -52.697  14.195 -17.560  4.00  0.00           O  
ATOM    101  C4'  DT A   4     -52.260  13.436 -15.110  6.00  0.00           C  
ATOM    102  O4'  DT A   4     -52.341  12.012 -14.940  6.00  0.00           O  
ATOM    103  C3'  DT A   4     -50.790  13.829 -15.230  3.00  0.00           C  
ATOM    104  O3'  DT A   4     -50.393  14.041 -13.940  2.00  0.00           O  
ATOM    105  C2'  DT A   4     -50.239  12.524 -15.800  8.00  0.00           C  
ATOM    106  C1'  DT A   4     -51.079  11.466 -15.150  2.00  0.00           C  
ATOM    107  N1   DT A   4     -51.187  10.269 -15.980  6.00  0.00           N  
ATOM    108  C2   DT A   4     -50.705   9.046 -15.410  2.00  0.00           C  
ATOM    109  O2   DT A   4     -50.295   8.953 -14.260  1.00  0.00           O  
ATOM    110  N3   DT A   4     -50.656   8.006 -16.250  6.00  0.00           N  
ATOM    111  C4   DT A   4     -51.129   7.924 -17.540  9.00  0.00           C  
ATOM    112  O4   DT A   4     -51.192   6.875 -18.140  1.00  0.00           O  
ATOM    113  C5   DT A   4     -51.680   9.197 -18.010  7.00  0.00           C  
ATOM    114  C6   DT A   4     -51.714  10.310 -17.250  0.00  0.00           C  
ATOM    115  C7   DT A   4     -51.824   9.372 -19.520  2.00  0.00           C  
ATOM    116  OP1  DT A   4     -53.670  16.549 -17.770  3.00  0.00           O  
ATOM    117  OP2  DT A   4     -52.928  15.292 -19.870  1.00  0.00           O1-
ATOM    118  H3   DT A   4     -50.247   7.214 -15.790  6.00  0.00           H  
ATOM    119  H6   DT A   4     -51.828  11.301 -17.620  9.00  0.00           H  
ATOM    120  H1'  DT A   4     -50.691  11.188 -14.140  2.00  0.00           H  
ATOM    121  H2'  DT A   4     -50.376  12.449 -16.850  6.00  0.00           H  
ATOM    122  H3'  DT A   4     -50.632  14.663 -15.860  4.00  0.00           H  
ATOM    123  H4'  DT A   4     -52.686  13.925 -14.240  2.00  0.00           H  
ATOM    124  H5'  DT A   4     -54.045  13.218 -16.330  5.00  0.00           H  
ATOM    125  H71  DT A   4     -52.219  10.330 -19.670  2.00  0.00           H  
ATOM    126  H72  DT A   4     -50.854   9.298 -19.990  3.00  0.00           H  
ATOM    127  H73  DT A   4     -52.548   8.564 -19.890  7.00  0.00           H  
ATOM    128 H2''  DT A   4     -49.162  12.388 -15.540  3.00  0.00           H  
ATOM    129 H5''  DT A   4     -53.585  14.823 -15.800  4.00  0.00           H  
ATOM    130  P    DT A   5     -48.964  14.589 -13.660  5.00  0.00           P  
ATOM    131  C5'  DT A   5     -48.065  12.581 -12.180  5.00  0.00           C  
ATOM    132  O5'  DT A   5     -47.996  13.319 -13.400  6.00  0.00           O  
ATOM    133  C4'  DT A   5     -47.177  11.413 -12.170  3.00  0.00           C  
ATOM    134  O4'  DT A   5     -47.638  10.367 -13.030  9.00  0.00           O  
ATOM    135  C3'  DT A   5     -45.677  11.723 -12.460  9.00  0.00           C  
ATOM    136  O3'  DT A   5     -44.813  11.220 -11.530  0.00  0.00           O  
ATOM    137  C2'  DT A   5     -45.558  11.087 -13.920  4.00  0.00           C  
ATOM    138  C1'  DT A   5     -46.556   9.949 -13.810  2.00  0.00           C  
ATOM    139  N1   DT A   5     -47.056   9.369 -15.130  4.00  0.00           N  
ATOM    140  C2   DT A   5     -47.048   8.004 -15.230  4.00  0.00           C  
ATOM    141  O2   DT A   5     -46.666   7.250 -14.330  2.00  0.00           O  
ATOM    142  N3   DT A   5     -47.575   7.481 -16.420  2.00  0.00           N  
ATOM    143  C4   DT A   5     -47.810   8.202 -17.580  9.00  0.00           C  
ATOM    144  O4   DT A   5     -48.302   7.666 -18.620  8.00  0.00           O  
ATOM    145  C5   DT A   5     -47.641   9.646 -17.400  2.00  0.00           C  
ATOM    146  C6   DT A   5     -47.363  10.139 -16.210  5.00  0.00           C  
ATOM    147  C7   DT A   5     -48.204  10.549 -18.410  3.00  0.00           C  
ATOM    148  OP1  DT A   5     -49.021  15.320 -12.350  7.00  0.00           O  
ATOM    149  OP2  DT A   5     -48.428  15.267 -14.840  5.00  0.00           O1-
ATOM    150  H3   DT A   5     -47.816   6.489 -16.470  9.00  0.00           H  
ATOM    151  H6   DT A   5     -47.537  11.162 -16.030  0.00  0.00           H  
ATOM    152  H1'  DT A   5     -46.063   9.123 -13.160  5.00  0.00           H  
ATOM    153  H2'  DT A   5     -45.944  11.816 -14.670  0.00  0.00           H  
ATOM    154  H3'  DT A   5     -45.537  12.786 -12.490  3.00  0.00           H  
ATOM    155  H4'  DT A   5     -47.193  10.980 -11.170  6.00  0.00           H  
ATOM    156  H5'  DT A   5     -49.041  12.155 -12.040  8.00  0.00           H  
ATOM    157  H71  DT A   5     -48.287  11.594 -18.110  1.00  0.00           H  
ATOM    158  H72  DT A   5     -47.606  10.536 -19.250  3.00  0.00           H  
ATOM    159  H73  DT A   5     -49.224  10.225 -18.670  7.00  0.00           H  
ATOM    160 H2''  DT A   5     -44.528  10.634 -14.140  0.00  0.00           H  
ATOM    161 H5''  DT A   5     -47.635  13.174 -11.390  0.00  0.00           H  
ATOM    162  P    DA A   6     -43.258  11.544 -11.480  6.00  0.00           P  
ATOM    163  C5'  DA A   6     -42.477   9.242 -12.440  3.00  0.00           C  
ATOM    164  O5'  DA A   6     -42.748  10.658 -12.630  0.00  0.00           O  
ATOM    165  C4'  DA A   6     -42.139   8.643 -13.800  4.00  0.00           C  
ATOM    166  O4'  DA A   6     -43.110   8.682 -14.750  0.00  0.00           O  
ATOM    167  C3'  DA A   6     -40.827   9.221 -14.410  3.00  0.00           C  
ATOM    168  O3'  DA A   6     -39.956   8.109 -14.640  3.00  0.00           O  
ATOM    169  C2'  DA A   6     -41.452   9.648 -15.720  6.00  0.00           C  
ATOM    170  C1'  DA A   6     -42.417   8.617 -16.020  7.00  0.00           C  
ATOM    171  N1   DA A   6     -44.970   5.838 -19.520  6.00  0.00           N  
ATOM    172  C2   DA A   6     -44.340   5.445 -18.410  8.00  0.00           C  
ATOM    173  N3   DA A   6     -43.716   6.270 -17.540  1.00  0.00           N  
ATOM    174  C4   DA A   6     -43.865   7.620 -17.900  7.00  0.00           C  
ATOM    175  C5   DA A   6     -44.616   8.136 -18.920  0.00  0.00           C  
ATOM    176  C6   DA A   6     -45.071   7.140 -19.820  1.00  0.00           C  
ATOM    177  N6   DA A   6     -45.495   7.409 -21.050  5.00  0.00           N  
ATOM    178  N7   DA A   6     -44.611   9.547 -18.860  7.00  0.00           N  
ATOM    179  C8   DA A   6     -43.885   9.859 -17.790  8.00  0.00           C  
ATOM    180  N9   DA A   6     -43.354   8.742 -17.220  2.00  0.00           N  
ATOM    181  OP1  DA A   6     -42.742  11.168 -10.200  4.00  0.00           O  
ATOM    182  OP2  DA A   6     -43.111  12.937 -11.840  2.00  0.00           O1-
ATOM    183  H2   DA A   6     -44.190   4.385 -18.260  3.00  0.00           H  
ATOM    184  H8   DA A   6     -43.766  10.839 -17.410  0.00  0.00           H  
ATOM    185  H1'  DA A   6     -41.821   7.774 -16.250  6.00  0.00           H  
ATOM    186  H2'  DA A   6     -42.025  10.589 -15.690  7.00  0.00           H  
ATOM    187  H3'  DA A   6     -40.386   9.992 -13.760  6.00  0.00           H  
ATOM    188  H4'  DA A   6     -41.995   7.562 -13.650  4.00  0.00           H  
ATOM    189  H5'  DA A   6     -43.182   8.587 -11.900  8.00  0.00           H  
ATOM    190  H61  DA A   6     -45.728   6.703 -21.700  6.00  0.00           H  
ATOM    191  H62  DA A   6     -45.539   8.385 -21.230  1.00  0.00           H  
ATOM    192 H2''  DA A   6     -40.636   9.609 -16.340  7.00  0.00           H  
ATOM    193 H5''  DA A   6     -41.552   9.206 -11.830  9.00  0.00           H  
ATOM    194  P    DG A   7     -38.855   7.638 -13.550  8.00  0.00           P  
ATOM    195  C5'  DG A   7     -39.034   5.040 -13.570  6.00  0.00           C  
ATOM    196  O5'  DG A   7     -38.461   6.183 -14.140  8.00  0.00           O  
ATOM    197  C4'  DG A   7     -38.904   3.818 -14.580  0.00  0.00           C  
ATOM    198  O4'  DG A   7     -39.816   3.908 -15.610  2.00  0.00           O  
ATOM    199  C3'  DG A   7     -37.500   3.449 -15.080  0.00  0.00           C  
ATOM    200  O3'  DG A   7     -37.439   2.015 -15.220  5.00  0.00           O  
ATOM    201  C2'  DG A   7     -37.488   4.241 -16.410  1.00  0.00           C  
ATOM    202  C1'  DG A   7     -39.041   4.121 -16.750  7.00  0.00           C  
ATOM    203  N1   DG A   7     -42.075   4.597 -20.710  9.00  0.00           N  
ATOM    204  C2   DG A   7     -41.512   3.523 -20.110  3.00  0.00           C  
ATOM    205  N2   DG A   7     -41.966   2.352 -20.480  6.00  0.00           N  
ATOM    206  N3   DG A   7     -40.595   3.622 -19.190  0.00  0.00           N  
ATOM    207  C4   DG A   7     -40.317   4.884 -18.750  1.00  0.00           C  
ATOM    208  C5   DG A   7     -40.783   6.040 -19.350  9.00  0.00           C  
ATOM    209  C6   DG A   7     -41.745   5.937 -20.490  8.00  0.00           C  
ATOM    210  O6   DG A   7     -42.371   6.859 -21.090  7.00  0.00           O  
ATOM    211  N7   DG A   7     -40.249   7.102 -18.630  0.00  0.00           N  
ATOM    212  C8   DG A   7     -39.540   6.543 -17.660  0.00  0.00           C  
ATOM    213  N9   DG A   7     -39.499   5.167 -17.680  9.00  0.00           N  
ATOM    214  OP1  DG A   7     -39.580   7.500 -12.330  5.00  0.00           O  
ATOM    215  OP2  DG A   7     -37.671   8.508 -13.610  5.00  0.00           O1-
ATOM    216  H1   DG A   7     -42.730   4.293 -21.420  6.00  0.00           H  
ATOM    217  H8   DG A   7     -39.065   7.094 -16.830  2.00  0.00           H  
ATOM    218  H1'  DG A   7     -39.120   3.214 -17.210  1.00  0.00           H  
ATOM    219  H2'  DG A   7     -37.193   5.249 -16.250  6.00  0.00           H  
ATOM    220  H21  DG A   7     -42.598   2.376 -21.250  2.00  0.00           H  
ATOM    221  H3'  DG A   7     -36.673   3.878 -14.410  2.00  0.00           H  
ATOM    222  H22  DG A   7     -41.441   1.510 -20.270  8.00  0.00           H  
ATOM    223  H4'  DG A   7     -39.303   2.960 -14.050  0.00  0.00           H  
ATOM    224  H5'  DG A   7     -40.119   5.155 -13.360  2.00  0.00           H  
ATOM    225 H2''  DG A   7     -36.887   3.749 -17.090  8.00  0.00           H  
ATOM    226 H5''  DG A   7     -38.469   4.853 -12.660  1.00  0.00           H  
ATOM    227  P    DG A   8     -36.113   1.276 -15.520  7.00  0.00           P  
ATOM    228  C5'  DG A   8     -36.794   0.173 -17.880  6.00  0.00           C  
ATOM    229  O5'  DG A   8     -36.046   1.168 -17.170  8.00  0.00           O  
ATOM    230  C4'  DG A   8     -37.091   0.536 -19.410  7.00  0.00           C  
ATOM    231  O4'  DG A   8     -37.884   1.705 -19.540  5.00  0.00           O  
ATOM    232  C3'  DG A   8     -35.819   0.825 -20.190  0.00  0.00           C  
ATOM    233  O3'  DG A   8     -35.746   0.053 -21.350  7.00  0.00           O  
ATOM    234  C2'  DG A   8     -35.971   2.289 -20.520  0.00  0.00           C  
ATOM    235  C1'  DG A   8     -37.501   2.347 -20.710  0.00  0.00           C  
ATOM    236  N1   DG A   8     -40.072   5.293 -24.000  0.00  0.00           N  
ATOM    237  C2   DG A   8     -39.958   3.970 -23.950  1.00  0.00           C  
ATOM    238  N2   DG A   8     -40.404   3.307 -24.990  3.00  0.00           N  
ATOM    239  N3   DG A   8     -39.394   3.325 -22.970  9.00  0.00           N  
ATOM    240  C4   DG A   8     -38.710   4.133 -22.100  1.00  0.00           C  
ATOM    241  C5   DG A   8     -38.673   5.512 -22.110  4.00  0.00           C  
ATOM    242  C6   DG A   8     -39.444   6.117 -23.100  0.00  0.00           C  
ATOM    243  O6   DG A   8     -39.677   7.318 -23.300  6.00  0.00           O  
ATOM    244  N7   DG A   8     -37.829   5.992 -21.090  4.00  0.00           N  
ATOM    245  C8   DG A   8     -37.495   4.912 -20.420  3.00  0.00           C  
ATOM    246  N9   DG A   8     -37.926   3.755 -21.030  7.00  0.00           N  
ATOM    247  OP1  DG A   8     -36.199  -0.072 -14.930  9.00  0.00           O  
ATOM    248  OP2  DG A   8     -35.029   2.167 -15.070  1.00  0.00           O1-
ATOM    249  H1   DG A   8     -40.541   5.783 -24.690  7.00  0.00           H  
ATOM    250  H8   DG A   8     -36.749   4.995 -19.570  6.00  0.00           H  
ATOM    251  H1'  DG A   8     -37.637   1.715 -21.620  4.00  0.00           H  
ATOM    252  H2'  DG A   8     -35.667   2.807 -19.580  6.00  0.00           H  
ATOM    253  H21  DG A   8     -40.685   3.829 -25.780  2.00  0.00           H  
ATOM    254  H3'  DG A   8     -34.936   0.861 -19.620  4.00  0.00           H  
ATOM    255  H22  DG A   8     -40.442   2.295 -25.060  9.00  0.00           H  
ATOM    256  H4'  DG A   8     -37.619  -0.238 -19.950  2.00  0.00           H  
ATOM    257  H5'  DG A   8     -37.688  -0.002 -17.360  0.00  0.00           H  
ATOM    258 H2''  DG A   8     -35.304   2.503 -21.320  6.00  0.00           H  
ATOM    259 H5''  DG A   8     -36.279  -0.831 -17.860  3.00  0.00           H  
ATOM    260  P    DG A   9     -35.006  -1.293 -21.460  3.00  0.00           P  
ATOM    261  C5'  DG A   9     -36.890  -2.371 -23.020  6.00  0.00           C  
ATOM    262  O5'  DG A   9     -35.567  -1.902 -22.820  4.00  0.00           O  
ATOM    263  C4'  DG A   9     -37.289  -2.463 -24.540  2.00  0.00           C  
ATOM    264  O4'  DG A   9     -37.814  -1.211 -24.910  0.00  0.00           O  
ATOM    265  C3'  DG A   9     -36.187  -2.905 -25.550  3.00  0.00           C  
ATOM    266  O3'  DG A   9     -36.834  -3.575 -26.630  0.00  0.00           O  
ATOM    267  C2'  DG A   9     -35.735  -1.506 -25.930  8.00  0.00           C  
ATOM    268  C1'  DG A   9     -36.998  -0.646 -25.900  0.00  0.00           C  
ATOM    269  N1   DG A   9     -37.696   4.209 -27.500  6.00  0.00           N  
ATOM    270  C2   DG A   9     -38.155   3.035 -27.980  1.00  0.00           C  
ATOM    271  N2   DG A   9     -38.947   3.144 -29.070  7.00  0.00           N  
ATOM    272  N3   DG A   9     -37.769   1.844 -27.580  0.00  0.00           N  
ATOM    273  C4   DG A   9     -37.049   1.812 -26.400  5.00  0.00           C  
ATOM    274  C5   DG A   9     -36.775   2.935 -25.680  4.00  0.00           C  
ATOM    275  C6   DG A   9     -37.104   4.241 -26.270  9.00  0.00           C  
ATOM    276  O6   DG A   9     -37.055   5.388 -25.740  9.00  0.00           O  
ATOM    277  N7   DG A   9     -36.012   2.612 -24.540  6.00  0.00           N  
ATOM    278  C8   DG A   9     -36.035   1.292 -24.500  1.00  0.00           C  
ATOM    279  N9   DG A   9     -36.646   0.748 -25.590  9.00  0.00           N  
ATOM    280  OP1  DG A   9     -35.442  -2.168 -20.290  1.00  0.00           O  
ATOM    281  OP2  DG A   9     -33.563  -1.095 -21.720  2.00  0.00           O1-
ATOM    282  H1   DG A   9     -37.840   5.085 -27.970  2.00  0.00           H  
ATOM    283  H8   DG A   9     -35.606   0.719 -23.700  5.00  0.00           H  
ATOM    284  H1'  DG A   9     -37.508  -0.646 -26.840  1.00  0.00           H  
ATOM    285  H2'  DG A   9     -34.961  -1.083 -25.340  7.00  0.00           H  
ATOM    286  H21  DG A   9     -39.207   4.031 -29.450  3.00  0.00           H  
ATOM    287  H3'  DG A   9     -35.567  -3.566 -24.960  2.00  0.00           H  
ATOM    288  H22  DG A   9     -39.246   2.311 -29.490  8.00  0.00           H  
ATOM    289  H4'  DG A   9     -38.059  -3.273 -24.630  0.00  0.00           H  
ATOM    290  H5'  DG A   9     -37.574  -1.731 -22.430  7.00  0.00           H  
ATOM    291 H2''  DG A   9     -35.402  -1.563 -26.970  3.00  0.00           H  
ATOM    292 H5''  DG A   9     -36.971  -3.350 -22.640  6.00  0.00           H  
ATOM    293  P    DT A  10     -36.044  -4.190 -27.840  5.00  0.00           P  
ATOM    294  C5'  DT A  10     -37.339  -2.972 -29.670  6.00  0.00           C  
ATOM    295  O5'  DT A  10     -36.085  -3.193 -29.020  7.00  0.00           O  
ATOM    296  C4'  DT A  10     -37.180  -1.742 -30.540  6.00  0.00           C  
ATOM    297  O4'  DT A  10     -36.847  -0.605 -29.770  8.00  0.00           O  
ATOM    298  C3'  DT A  10     -36.217  -1.773 -31.650  6.00  0.00           C  
ATOM    299  O3'  DT A  10     -36.832  -1.634 -32.930  2.00  0.00           O  
ATOM    300  C2'  DT A  10     -35.367  -0.515 -31.440  9.00  0.00           C  
ATOM    301  C1'  DT A  10     -36.238   0.311 -30.600  8.00  0.00           C  
ATOM    302  N1   DT A  10     -35.473   1.385 -29.840  1.00  0.00           N  
ATOM    303  C2   DT A  10     -35.632   2.743 -30.170  5.00  0.00           C  
ATOM    304  O2   DT A  10     -36.334   3.112 -31.140  9.00  0.00           O  
ATOM    305  N3   DT A  10     -35.118   3.617 -29.260  6.00  0.00           N  
ATOM    306  C4   DT A  10     -34.319   3.295 -28.230  2.00  0.00           C  
ATOM    307  O4   DT A  10     -34.193   4.216 -27.460  1.00  0.00           O  
ATOM    308  C5   DT A  10     -33.967   1.900 -28.030  3.00  0.00           C  
ATOM    309  C6   DT A  10     -34.555   0.962 -28.860  6.00  0.00           C  
ATOM    310  C7   DT A  10     -33.187   1.459 -26.760  8.00  0.00           C  
ATOM    311  OP1  DT A  10     -36.818  -5.360 -28.240  9.00  0.00           O  
ATOM    312  OP2  DT A  10     -34.653  -4.384 -27.450  7.00  0.00           O1-
ATOM    313  H3   DT A  10     -35.505   4.542 -29.290  2.00  0.00           H  
ATOM    314  H6   DT A  10     -34.410  -0.114 -28.730  8.00  0.00           H  
ATOM    315  H1'  DT A  10     -36.985   0.801 -31.230  4.00  0.00           H  
ATOM    316  H2'  DT A  10     -34.355  -0.751 -31.050  9.00  0.00           H  
ATOM    317  H3'  DT A  10     -35.642  -2.692 -31.580  2.00  0.00           H  
ATOM    318  H4'  DT A  10     -38.132  -1.608 -31.010  5.00  0.00           H  
ATOM    319  H5'  DT A  10     -37.992  -2.718 -28.930  1.00  0.00           H  
ATOM    320  H71  DT A  10     -32.881   0.422 -26.790  2.00  0.00           H  
ATOM    321  H72  DT A  10     -32.272   2.100 -26.780  5.00  0.00           H  
ATOM    322  H73  DT A  10     -33.698   1.646 -25.880  1.00  0.00           H  
ATOM    323 H2''  DT A  10     -35.277   0.066 -32.380  4.00  0.00           H  
ATOM    324 H5''  DT A  10     -37.696  -3.906 -30.230  4.00  0.00           H  
ATOM    325  P    DT A  11     -36.177  -1.788 -34.310  4.00  0.00           P  
ATOM    326  C5'  DT A  11     -36.697   0.686 -35.080  0.00  0.00           C  
ATOM    327  O5'  DT A  11     -35.739  -0.309 -34.740  8.00  0.00           O  
ATOM    328  C4'  DT A  11     -36.313   2.009 -35.780  6.00  0.00           C  
ATOM    329  O4'  DT A  11     -35.650   2.842 -34.910  9.00  0.00           O  
ATOM    330  C3'  DT A  11     -35.398   1.853 -37.060  4.00  0.00           C  
ATOM    331  O3'  DT A  11     -35.562   3.000 -37.900  5.00  0.00           O  
ATOM    332  C2'  DT A  11     -34.023   1.828 -36.350  4.00  0.00           C  
ATOM    333  C1'  DT A  11     -34.341   3.015 -35.350  7.00  0.00           C  
ATOM    334  N1   DT A  11     -33.496   3.064 -34.080  3.00  0.00           N  
ATOM    335  C2   DT A  11     -33.307   4.296 -33.480  4.00  0.00           C  
ATOM    336  O2   DT A  11     -33.580   5.435 -33.910  9.00  0.00           O  
ATOM    337  N3   DT A  11     -32.483   4.298 -32.360  3.00  0.00           N  
ATOM    338  C4   DT A  11     -31.913   3.211 -31.770  3.00  0.00           C  
ATOM    339  O4   DT A  11     -31.143   3.436 -30.810  6.00  0.00           O  
ATOM    340  C5   DT A  11     -32.263   1.913 -32.300  2.00  0.00           C  
ATOM    341  C6   DT A  11     -33.092   1.869 -33.380  8.00  0.00           C  
ATOM    342  C7   DT A  11     -31.851   0.664 -31.630  2.00  0.00           C  
ATOM    343  OP1  DT A  11     -37.178  -2.327 -35.290  0.00  0.00           O  
ATOM    344  OP2  DT A  11     -34.942  -2.515 -34.120  3.00  0.00           O1-
ATOM    345  H3   DT A  11     -32.100   5.191 -31.960  6.00  0.00           H  
ATOM    346  H6   DT A  11     -33.352   0.909 -33.720  5.00  0.00           H  
ATOM    347  H1'  DT A  11     -34.134   3.891 -35.860  0.00  0.00           H  
ATOM    348  H2'  DT A  11     -33.821   0.863 -35.860  3.00  0.00           H  
ATOM    349  H3'  DT A  11     -35.583   0.871 -37.460  1.00  0.00           H  
ATOM    350  H4'  DT A  11     -37.305   2.456 -36.150  2.00  0.00           H  
ATOM    351  H5'  DT A  11     -37.278   1.046 -34.150  5.00  0.00           H  
ATOM    352  H71  DT A  11     -30.794   0.683 -31.460  8.00  0.00           H  
ATOM    353  H72  DT A  11     -32.327   0.768 -30.690  0.00  0.00           H  
ATOM    354  H73  DT A  11     -32.165  -0.233 -32.120  4.00  0.00           H  
ATOM    355 H2''  DT A  11     -33.148   2.063 -37.020  1.00  0.00           H  
ATOM    356 H5''  DT A  11     -37.444   0.178 -35.730  5.00  0.00           H  
ATOM    357  P    DA A  12     -34.862   3.187 -39.190  8.00  0.00           P  
ATOM    358  C5'  DA A  12     -35.407   5.755 -39.490  0.00  0.00           C  
ATOM    359  O5'  DA A  12     -35.636   4.374 -39.880  7.00  0.00           O  
ATOM    360  C4'  DA A  12     -36.237   6.637 -40.390  3.00  0.00           C  
ATOM    361  O4'  DA A  12     -36.186   7.991 -39.900  3.00  0.00           O  
ATOM    362  C3'  DA A  12     -35.827   6.623 -41.870  0.00  0.00           C  
ATOM    363  O3'  DA A  12     -37.002   6.871 -42.690  0.00  0.00           O  
ATOM    364  C2'  DA A  12     -34.974   7.888 -41.930  7.00  0.00           C  
ATOM    365  C1'  DA A  12     -35.691   8.801 -40.970  9.00  0.00           C  
ATOM    366  N1   DA A  12     -34.992  13.899 -40.790  6.00  0.00           N  
ATOM    367  C2   DA A  12     -36.036  13.204 -41.190  4.00  0.00           C  
ATOM    368  N3   DA A  12     -36.131  11.870 -41.180  5.00  0.00           N  
ATOM    369  C4   DA A  12     -35.058  11.221 -40.680  3.00  0.00           C  
ATOM    370  C5   DA A  12     -33.979  11.785 -40.040  9.00  0.00           C  
ATOM    371  C6   DA A  12     -34.017  13.222 -40.190  4.00  0.00           C  
ATOM    372  N6   DA A  12     -33.138  14.109 -39.660  8.00  0.00           N  
ATOM    373  N7   DA A  12     -33.159  10.899 -39.390  1.00  0.00           N  
ATOM    374  C8   DA A  12     -33.709   9.752 -39.720  0.00  0.00           C  
ATOM    375  N9   DA A  12     -34.903   9.850 -40.380  4.00  0.00           N  
ATOM    376  OP1  DA A  12     -35.179   2.034 -40.070  1.00  0.00           O  
ATOM    377  OP2  DA A  12     -33.498   3.519 -38.930  7.00  0.00           O1-
ATOM    378  H2   DA A  12     -36.836  13.779 -41.520  9.00  0.00           H  
ATOM    379  H8   DA A  12     -33.216   8.821 -39.450  9.00  0.00           H  
ATOM    380  H1'  DA A  12     -36.523   9.287 -41.590  3.00  0.00           H  
ATOM    381  H2'  DA A  12     -33.970   7.737 -41.500  8.00  0.00           H  
ATOM    382  H3'  DA A  12     -35.418   5.669 -42.220  8.00  0.00           H  
ATOM    383  H4'  DA A  12     -37.257   6.256 -40.250  5.00  0.00           H  
ATOM    384  H5'  DA A  12     -34.302   5.972 -39.570  5.00  0.00           H  
ATOM    385  H61  DA A  12     -33.255  15.144 -39.790  9.00  0.00           H  
ATOM    386  H62  DA A  12     -32.190  13.827 -39.490  8.00  0.00           H  
ATOM    387 H2''  DA A  12     -34.987   8.225 -42.940  6.00  0.00           H  
ATOM    388 H5''  DA A  12     -35.757   6.035 -38.510  0.00  0.00           H  
ATOM    389  P    DG A  13     -37.051   6.748 -44.270  1.00  0.00           P  
ATOM    390  C5'  DG A  13     -37.106   9.347 -44.960  9.00  0.00           C  
ATOM    391  O5'  DG A  13     -36.417   8.126 -44.870  2.00  0.00           O  
ATOM    392  C4'  DG A  13     -36.304  10.593 -45.330  7.00  0.00           C  
ATOM    393  O4'  DG A  13     -35.419  10.935 -44.290  0.00  0.00           O  
ATOM    394  C3'  DG A  13     -35.542  10.542 -46.610  6.00  0.00           C  
ATOM    395  O3'  DG A  13     -35.682  11.571 -47.570  0.00  0.00           O  
ATOM    396  C2'  DG A  13     -34.092  10.482 -46.100  5.00  0.00           C  
ATOM    397  C1'  DG A  13     -34.173  11.331 -44.870  8.00  0.00           C  
ATOM    398  N1   DG A  13     -30.726  13.881 -42.400  6.00  0.00           N  
ATOM    399  C2   DG A  13     -31.738  14.348 -43.160  3.00  0.00           C  
ATOM    400  N2   DG A  13     -31.837  15.567 -43.530  8.00  0.00           N  
ATOM    401  N3   DG A  13     -32.556  13.544 -43.820  1.00  0.00           N  
ATOM    402  C4   DG A  13     -32.429  12.220 -43.440  3.00  0.00           C  
ATOM    403  C5   DG A  13     -31.526  11.681 -42.510  7.00  0.00           C  
ATOM    404  C6   DG A  13     -30.603  12.571 -41.970  0.00  0.00           C  
ATOM    405  O6   DG A  13     -29.699  12.202 -41.180  6.00  0.00           O  
ATOM    406  N7   DG A  13     -31.650  10.286 -42.370  7.00  0.00           N  
ATOM    407  C8   DG A  13     -32.601  10.044 -43.290  2.00  0.00           C  
ATOM    408  N9   DG A  13     -33.088  11.148 -43.960  6.00  0.00           N  
ATOM    409  OP1  DG A  13     -38.505   6.737 -44.570  3.00  0.00           O  
ATOM    410  OP2  DG A  13     -36.199   5.680 -44.700  7.00  0.00           O1-
ATOM    411  H1   DG A  13     -30.038  14.483 -42.110  3.00  0.00           H  
ATOM    412  H8   DG A  13     -33.102   9.080 -43.510  8.00  0.00           H  
ATOM    413  H1'  DG A  13     -34.182  12.400 -45.300  3.00  0.00           H  
ATOM    414  H2'  DG A  13     -33.756   9.443 -45.810  8.00  0.00           H  
ATOM    415  H21  DG A  13     -31.169  16.226 -43.100  7.00  0.00           H  
ATOM    416  H3'  DG A  13     -35.712   9.587 -47.080  2.00  0.00           H  
ATOM    417  H22  DG A  13     -32.634  15.908 -43.970  9.00  0.00           H  
ATOM    418  H4'  DG A  13     -36.943  11.399 -45.490  3.00  0.00           H  
ATOM    419  H5'  DG A  13     -37.749   9.550 -44.140  0.00  0.00           H  
ATOM    420 H2''  DG A  13     -33.401  10.947 -46.740  7.00  0.00           H  
ATOM    421 H5''  DG A  13     -37.841   9.290 -45.820  6.00  0.00           H  
ATOM    422  P    DG A  14     -35.145  11.367 -49.110  1.00  0.00           P  
ATOM    423  C5'  DG A  14     -32.906  12.622 -49.990  0.00  0.00           C  
ATOM    424  O5'  DG A  14     -33.606  11.894 -48.960  3.00  0.00           O  
ATOM    425  C4'  DG A  14     -32.028  13.680 -49.360  7.00  0.00           C  
ATOM    426  O4'  DG A  14     -31.128  13.077 -48.400  2.00  0.00           O  
ATOM    427  C3'  DG A  14     -32.909  14.689 -48.590  9.00  0.00           C  
ATOM    428  O3'  DG A  14     -32.781  16.045 -49.070  1.00  0.00           O  
ATOM    429  C2'  DG A  14     -32.408  14.557 -47.110  9.00  0.00           C  
ATOM    430  C1'  DG A  14     -31.518  13.325 -47.090  0.00  0.00           C  
ATOM    431  N1   DG A  14     -28.170  10.923 -43.820  4.00  0.00           N  
ATOM    432  C2   DG A  14     -29.029  10.355 -44.800  2.00  0.00           C  
ATOM    433  N2   DG A  14     -29.254   9.127 -44.610  5.00  0.00           N  
ATOM    434  N3   DG A  14     -29.885  11.028 -45.560  9.00  0.00           N  
ATOM    435  C4   DG A  14     -29.660  12.408 -45.480  7.00  0.00           C  
ATOM    436  C5   DG A  14     -28.732  13.008 -44.650  9.00  0.00           C  
ATOM    437  C6   DG A  14     -27.906  12.219 -43.780  3.00  0.00           C  
ATOM    438  O6   DG A  14     -26.960  12.665 -43.070  8.00  0.00           O  
ATOM    439  N7   DG A  14     -28.723  14.411 -44.840  7.00  0.00           N  
ATOM    440  C8   DG A  14     -29.663  14.644 -45.710  3.00  0.00           C  
ATOM    441  N9   DG A  14     -30.325  13.475 -46.120  0.00  0.00           N  
ATOM    442  OP1  DG A  14     -35.898  12.308 -49.940  3.00  0.00           O  
ATOM    443  OP2  DG A  14     -34.991   9.942 -49.490  2.00  0.00           O1-
ATOM    444  H1   DG A  14     -27.532  10.219 -43.430  3.00  0.00           H  
ATOM    445  H8   DG A  14     -29.920  15.578 -46.010  9.00  0.00           H  
ATOM    446  H1'  DG A  14     -32.020  12.448 -46.700  9.00  0.00           H  
ATOM    447  H2'  DG A  14     -31.804  15.399 -46.880  5.00  0.00           H  
ATOM    448  H21  DG A  14     -28.715   8.503 -44.070  0.00  0.00           H  
ATOM    449  H3'  DG A  14     -33.910  14.344 -48.510  5.00  0.00           H  
ATOM    450  H22  DG A  14     -30.213   8.796 -44.900  4.00  0.00           H  
ATOM    451  H4'  DG A  14     -31.343  14.189 -50.070  2.00  0.00           H  
ATOM    452  H5'  DG A  14     -33.566  12.978 -50.710  4.00  0.00           H  
ATOM    453 H2''  DG A  14     -33.194  14.590 -46.420  1.00  0.00           H  
ATOM    454 H5''  DG A  14     -32.311  11.792 -50.450  4.00  0.00           H  
ATOM    455  P    DG A  15     -33.125  16.446 -50.690  0.00  0.00           P  
ATOM    456  C5'  DG A  15     -30.753  16.757 -51.960  4.00  0.00           C  
ATOM    457  O5'  DG A  15     -31.847  15.967 -51.630  0.00  0.00           O  
ATOM    458  C4'  DG A  15     -30.173  17.523 -50.790  2.00  0.00           C  
ATOM    459  O4'  DG A  15     -29.875  16.578 -49.730  4.00  0.00           O  
ATOM    460  C3'  DG A  15     -28.801  18.009 -51.320  6.00  0.00           C  
ATOM    461  O3'  DG A  15     -28.648  19.330 -50.800  2.00  0.00           O  
ATOM    462  C2'  DG A  15     -27.689  17.211 -50.610  0.00  0.00           C  
ATOM    463  C1'  DG A  15     -28.465  16.830 -49.320  8.00  0.00           C  
ATOM    464  N1   DG A  15     -24.692  15.454 -46.340  8.00  0.00           N  
ATOM    465  C2   DG A  15     -25.025  16.686 -46.780  0.00  0.00           C  
ATOM    466  N2   DG A  15     -24.239  17.667 -46.460  8.00  0.00           N  
ATOM    467  N3   DG A  15     -25.924  16.944 -47.680  7.00  0.00           N  
ATOM    468  C4   DG A  15     -26.751  15.847 -47.870  3.00  0.00           C  
ATOM    469  C5   DG A  15     -26.560  14.536 -47.520  5.00  0.00           C  
ATOM    470  C6   DG A  15     -25.379  14.300 -46.700  2.00  0.00           C  
ATOM    471  O6   DG A  15     -24.928  13.231 -46.310  8.00  0.00           O  
ATOM    472  N7   DG A  15     -27.495  13.611 -48.010  9.00  0.00           N  
ATOM    473  C8   DG A  15     -28.304  14.418 -48.590  3.00  0.00           C  
ATOM    474  N9   DG A  15     -27.875  15.730 -48.610  3.00  0.00           N  
ATOM    475  OP1  DG A  15     -33.320  17.909 -50.670  3.00  0.00           O  
ATOM    476  OP2  DG A  15     -34.237  15.603 -51.070  1.00  0.00           O1-
ATOM    477  H1   DG A  15     -23.876  15.283 -45.750  4.00  0.00           H  
ATOM    478  H8   DG A  15     -29.164  14.114 -49.140  9.00  0.00           H  
ATOM    479  H1'  DG A  15     -28.518  17.689 -48.670  6.00  0.00           H  
ATOM    480  H2'  DG A  15     -27.453  16.310 -51.130  2.00  0.00           H  
ATOM    481  H21  DG A  15     -23.478  17.639 -45.840  8.00  0.00           H  
ATOM    482  H3'  DG A  15     -28.669  17.994 -52.400  5.00  0.00           H  
ATOM    483  H22  DG A  15     -24.510  18.477 -46.930  7.00  0.00           H  
ATOM    484  H4'  DG A  15     -30.873  18.311 -50.400  4.00  0.00           H  
ATOM    485  H5'  DG A  15     -31.066  17.425 -52.730  3.00  0.00           H  
ATOM    486 H2''  DG A  15     -26.734  17.830 -50.560  3.00  0.00           H  
ATOM    487 H5''  DG A  15     -29.922  16.127 -52.410  8.00  0.00           H  
ATOM    488  P    DT A  16     -27.897  20.512 -51.630  3.00  0.00           P  
ATOM    489  C5'  DT A  16     -25.637  21.860 -51.020  0.00  0.00           C  
ATOM    490  O5'  DT A  16     -26.583  20.826 -50.720  2.00  0.00           O  
ATOM    491  C4'  DT A  16     -24.434  21.949 -50.080  1.00  0.00           C  
ATOM    492  O4'  DT A  16     -24.779  22.092 -48.700  3.00  0.00           O  
ATOM    493  C3'  DT A  16     -23.583  20.722 -50.150  9.00  0.00           C  
ATOM    494  O3'  DT A  16     -22.274  21.168 -49.930  5.00  0.00           O  
ATOM    495  C2'  DT A  16     -24.124  19.877 -48.980  0.00  0.00           C  
ATOM    496  C1'  DT A  16     -24.198  21.032 -47.970  2.00  0.00           C  
ATOM    497  N1   DT A  16     -25.046  20.747 -46.770  7.00  0.00           N  
ATOM    498  C2   DT A  16     -24.521  21.196 -45.570  5.00  0.00           C  
ATOM    499  O2   DT A  16     -23.416  21.767 -45.500  2.00  0.00           O  
ATOM    500  N3   DT A  16     -25.375  21.037 -44.470  9.00  0.00           N  
ATOM    501  C4   DT A  16     -26.599  20.511 -44.490  7.00  0.00           C  
ATOM    502  O4   DT A  16     -27.359  20.618 -43.560  0.00  0.00           O  
ATOM    503  C5   DT A  16     -27.076  19.999 -45.800  7.00  0.00           C  
ATOM    504  C6   DT A  16     -26.301  20.201 -46.900  3.00  0.00           C  
ATOM    505  C7   DT A  16     -28.403  19.277 -46.130  0.00  0.00           C  
ATOM    506  OP1  DT A  16     -28.727  21.718 -51.520  2.00  0.00           O  
ATOM    507  OP2  DT A  16     -27.437  20.049 -52.970  6.00  0.00           O1-
ATOM    508  H3   DT A  16     -25.075  21.460 -43.620  2.00  0.00           H  
ATOM    509  H6   DT A  16     -26.710  20.000 -47.910  2.00  0.00           H  
ATOM    510  H1'  DT A  16     -23.165  21.268 -47.640  7.00  0.00           H  
ATOM    511  H2'  DT A  16     -25.073  19.382 -49.260  8.00  0.00           H  
ATOM    512  H3'  DT A  16     -23.668  20.265 -51.090  3.00  0.00           H  
ATOM    513  H4'  DT A  16     -23.944  22.837 -50.400  1.00  0.00           H  
ATOM    514  H5'  DT A  16     -26.175  22.827 -50.960  7.00  0.00           H  
ATOM    515  H71  DT A  16     -29.057  19.932 -46.560  9.00  0.00           H  
ATOM    516  H72  DT A  16     -28.158  18.482 -46.820  9.00  0.00           H  
ATOM    517  H73  DT A  16     -28.866  18.853 -45.210  2.00  0.00           H  
ATOM    518 H2''  DT A  16     -23.571  18.957 -48.690  0.00  0.00           H  
ATOM    519 H5''  DT A  16     -25.288  21.741 -52.010  3.00  0.00           H  
ATOM    520  P    DT A  17     -21.030  20.248 -50.300  7.00  0.00           P  
ATOM    521  C5'  DT A  17     -20.788  19.045 -47.880  0.00  0.00           C  
ATOM    522  O5'  DT A  17     -21.022  18.997 -49.330  5.00  0.00           O  
ATOM    523  C4'  DT A  17     -20.516  17.650 -47.370  8.00  0.00           C  
ATOM    524  O4'  DT A  17     -21.673  16.830 -47.670  7.00  0.00           O  
ATOM    525  C3'  DT A  17     -19.331  16.877 -48.130  9.00  0.00           C  
ATOM    526  O3'  DT A  17     -18.457  16.368 -47.190  9.00  0.00           O  
ATOM    527  C2'  DT A  17     -20.037  15.696 -48.720  4.00  0.00           C  
ATOM    528  C1'  DT A  17     -21.154  15.514 -47.730  2.00  0.00           C  
ATOM    529  N1   DT A  17     -22.134  14.524 -48.380  1.00  0.00           N  
ATOM    530  C2   DT A  17     -22.017  13.172 -48.050  2.00  0.00           C  
ATOM    531  O2   DT A  17     -21.288  12.749 -47.110  6.00  0.00           O  
ATOM    532  N3   DT A  17     -22.740  12.270 -48.810  5.00  0.00           N  
ATOM    533  C4   DT A  17     -23.645  12.662 -49.780  5.00  0.00           C  
ATOM    534  O4   DT A  17     -24.181  11.721 -50.360  7.00  0.00           O  
ATOM    535  C5   DT A  17     -23.804  14.093 -50.010  4.00  0.00           C  
ATOM    536  C6   DT A  17     -23.031  14.943 -49.340  9.00  0.00           C  
ATOM    537  C7   DT A  17     -24.978  14.537 -50.820  3.00  0.00           C  
ATOM    538  OP1  DT A  17     -19.751  21.057 -50.100  9.00  0.00           O  
ATOM    539  OP2  DT A  17     -21.285  19.639 -51.630  0.00  0.00           O1-
ATOM    540  H3   DT A  17     -22.495  11.360 -48.720  3.00  0.00           H  
ATOM    541  H6   DT A  17     -23.063  16.028 -49.450  3.00  0.00           H  
ATOM    542  H1'  DT A  17     -20.851  15.204 -46.670  6.00  0.00           H  
ATOM    543  H2'  DT A  17     -20.403  15.904 -49.780  8.00  0.00           H  
ATOM    544  H3'  DT A  17     -18.842  17.469 -48.940  2.00  0.00           H  
ATOM    545  H4'  DT A  17     -20.394  17.681 -46.270  2.00  0.00           H  
ATOM    546  H5'  DT A  17     -21.669  19.542 -47.470  3.00  0.00           H  
ATOM    547  H71  DT A  17     -25.129  15.563 -50.630  5.00  0.00           H  
ATOM    548  H72  DT A  17     -25.921  14.062 -50.370  1.00  0.00           H  
ATOM    549  H73  DT A  17     -24.962  14.207 -51.850  0.00  0.00           H  
ATOM    550 H2''  DT A  17     -19.497  14.773 -48.680  4.00  0.00           H  
ATOM    551 H5''  DT A  17     -20.027  19.792 -47.510  1.00  0.00           H  
ATOM    552  P    DA A  18     -17.027  17.031 -46.900  6.00  0.00           P  
ATOM    553  C5'  DA A  18     -17.302  16.301 -44.370  5.00  0.00           C  
ATOM    554  O5'  DA A  18     -16.608  16.224 -45.640  7.00  0.00           O  
ATOM    555  C4'  DA A  18     -16.446  15.698 -43.210  5.00  0.00           C  
ATOM    556  O4'  DA A  18     -16.205  14.333 -43.520  6.00  0.00           O  
ATOM    557  C3'  DA A  18     -15.078  16.369 -42.850  3.00  0.00           C  
ATOM    558  O3'  DA A  18     -14.764  16.181 -41.440  1.00  0.00           O  
ATOM    559  C2'  DA A  18     -14.141  15.580 -43.780  1.00  0.00           C  
ATOM    560  C1'  DA A  18     -14.792  14.149 -43.460  4.00  0.00           C  
ATOM    561  N1   DA A  18     -12.992   9.347 -44.320  0.00  0.00           N  
ATOM    562  C2   DA A  18     -12.814  10.238 -43.320  4.00  0.00           C  
ATOM    563  N3   DA A  18     -13.234  11.486 -43.210  9.00  0.00           N  
ATOM    564  C4   DA A  18     -13.819  11.946 -44.310  7.00  0.00           C  
ATOM    565  C5   DA A  18     -13.906  11.285 -45.500  1.00  0.00           C  
ATOM    566  C6   DA A  18     -13.603   9.883 -45.390  9.00  0.00           C  
ATOM    567  N6   DA A  18     -13.837   8.972 -46.280  6.00  0.00           N  
ATOM    568  N7   DA A  18     -14.530  12.023 -46.490  2.00  0.00           N  
ATOM    569  C8   DA A  18     -14.750  13.129 -45.810  7.00  0.00           C  
ATOM    570  N9   DA A  18     -14.365  13.168 -44.520  2.00  0.00           N  
ATOM    571  OP1  DA A  18     -17.133  18.430 -46.480  7.00  0.00           O  
ATOM    572  OP2  DA A  18     -16.163  16.687 -48.010  0.00  0.00           O1-
ATOM    573  H2   DA A  18     -12.336   9.700 -42.470  7.00  0.00           H  
ATOM    574  H8   DA A  18     -15.186  13.951 -46.370  5.00  0.00           H  
ATOM    575  H1'  DA A  18     -14.501  13.827 -42.410  7.00  0.00           H  
ATOM    576  H2'  DA A  18     -14.377  15.946 -44.780  1.00  0.00           H  
ATOM    577  H3'  DA A  18     -15.084  17.463 -43.040  5.00  0.00           H  
ATOM    578  H4'  DA A  18     -17.057  15.783 -42.320  1.00  0.00           H  
ATOM    579  H5'  DA A  18     -18.246  15.755 -44.350  4.00  0.00           H  
ATOM    580  H61  DA A  18     -13.921   8.042 -45.920  1.00  0.00           H  
ATOM    581  H62  DA A  18     -14.259   9.233 -47.130  9.00  0.00           H  
ATOM    582 H2''  DA A  18     -13.092  15.618 -43.480  9.00  0.00           H  
ATOM    583 H5''  DA A  18     -17.381  17.298 -44.180  8.00  0.00           H  
ATOM    584  P    DG A  19     -14.677  17.376 -40.340  0.00  0.00           P  
ATOM    585  C5'  DG A  19     -16.079  19.488 -41.190  2.00  0.00           C  
ATOM    586  O5'  DG A  19     -16.085  18.173 -40.720  8.00  0.00           O  
ATOM    587  C4'  DG A  19     -17.457  20.142 -41.480  9.00  0.00           C  
ATOM    588  O4'  DG A  19     -18.167  19.379 -42.440  3.00  0.00           O  
ATOM    589  C3'  DG A  19     -18.311  20.410 -40.320  7.00  0.00           C  
ATOM    590  O3'  DG A  19     -18.996  21.669 -40.560  3.00  0.00           O  
ATOM    591  C2'  DG A  19     -19.347  19.211 -40.480  6.00  0.00           C  
ATOM    592  C1'  DG A  19     -19.484  19.331 -41.980  4.00  0.00           C  
ATOM    593  N1   DG A  19     -20.573  14.286 -42.880  5.00  0.00           N  
ATOM    594  C2   DG A  19     -19.640  14.768 -41.980  1.00  0.00           C  
ATOM    595  N2   DG A  19     -18.916  13.840 -41.400  5.00  0.00           N  
ATOM    596  N3   DG A  19     -19.363  16.055 -41.740  6.00  0.00           N  
ATOM    597  C4   DG A  19     -20.225  16.865 -42.530  6.00  0.00           C  
ATOM    598  C5   DG A  19     -21.185  16.414 -43.430  2.00  0.00           C  
ATOM    599  C6   DG A  19     -21.379  14.989 -43.640  1.00  0.00           C  
ATOM    600  O6   DG A  19     -22.248  14.394 -44.250  2.00  0.00           O  
ATOM    601  N7   DG A  19     -21.784  17.431 -44.220  1.00  0.00           N  
ATOM    602  C8   DG A  19     -21.084  18.529 -43.750  4.00  0.00           C  
ATOM    603  N9   DG A  19     -20.240  18.282 -42.670  3.00  0.00           N  
ATOM    604  OP1  DG A  19     -13.512  18.224 -40.710  5.00  0.00           O  
ATOM    605  OP2  DG A  19     -14.803  16.783 -38.980  8.00  0.00           O1-
ATOM    606  H1   DG A  19     -20.813  13.264 -42.860  6.00  0.00           H  
ATOM    607  H8   DG A  19     -21.192  19.541 -44.170  2.00  0.00           H  
ATOM    608  H1'  DG A  19     -20.050  20.277 -42.280  3.00  0.00           H  
ATOM    609  H2'  DG A  19     -18.838  18.318 -40.160  9.00  0.00           H  
ATOM    610  H21  DG A  19     -19.076  12.909 -41.770  8.00  0.00           H  
ATOM    611  H3'  DG A  19     -17.828  20.299 -39.320  7.00  0.00           H  
ATOM    612  H22  DG A  19     -18.279  14.095 -40.660  1.00  0.00           H  
ATOM    613  H4'  DG A  19     -17.312  21.069 -42.000  2.00  0.00           H  
ATOM    614  H5'  DG A  19     -15.470  19.534 -42.080  9.00  0.00           H  
ATOM    615 H2''  DG A  19     -20.204  19.334 -39.950  5.00  0.00           H  
ATOM    616 H5''  DG A  19     -15.697  20.069 -40.350  3.00  0.00           H  
ATOM    617  P    DG A  20     -19.624  22.372 -39.310  3.00  0.00           P  
ATOM    618  C5'  DG A  20     -22.211  21.922 -39.230  9.00  0.00           C  
ATOM    619  O5'  DG A  20     -20.911  21.516 -38.880  2.00  0.00           O  
ATOM    620  C4'  DG A  20     -22.621  21.396 -40.630  8.00  0.00           C  
ATOM    621  O4'  DG A  20     -22.387  20.059 -40.920  7.00  0.00           O  
ATOM    622  C3'  DG A  20     -24.130  21.675 -40.910  7.00  0.00           C  
ATOM    623  O3'  DG A  20     -24.449  22.358 -42.170  8.00  0.00           O  
ATOM    624  C2'  DG A  20     -24.687  20.239 -40.850  7.00  0.00           C  
ATOM    625  C1'  DG A  20     -23.516  19.523 -41.530  3.00  0.00           C  
ATOM    626  N1   DG A  20     -25.816  15.256 -42.730  9.00  0.00           N  
ATOM    627  C2   DG A  20     -26.114  16.525 -42.940  9.00  0.00           C  
ATOM    628  N2   DG A  20     -26.985  16.729 -43.870  0.00  0.00           N  
ATOM    629  N3   DG A  20     -25.497  17.571 -42.520  2.00  0.00           N  
ATOM    630  C4   DG A  20     -24.438  17.182 -41.760  0.00  0.00           C  
ATOM    631  C5   DG A  20     -24.052  15.922 -41.350  1.00  0.00           C  
ATOM    632  C6   DG A  20     -24.821  14.819 -41.830  4.00  0.00           C  
ATOM    633  O6   DG A  20     -24.683  13.630 -41.590  1.00  0.00           O  
ATOM    634  N7   DG A  20     -22.915  16.012 -40.490  7.00  0.00           N  
ATOM    635  C8   DG A  20     -22.744  17.319 -40.340  5.00  0.00           C  
ATOM    636  N9   DG A  20     -23.546  18.062 -41.220  7.00  0.00           N  
ATOM    637  OP1  DG A  20     -19.988  23.742 -39.670  2.00  0.00           O  
ATOM    638  OP2  DG A  20     -18.791  22.242 -38.110  3.00  0.00           O1-
ATOM    639  H1   DG A  20     -26.439  14.508 -42.990  8.00  0.00           H  
ATOM    640  H8   DG A  20     -21.938  17.752 -39.740  4.00  0.00           H  
ATOM    641  H1'  DG A  20     -23.628  19.836 -42.570  8.00  0.00           H  
ATOM    642  H2'  DG A  20     -24.723  19.855 -39.790  6.00  0.00           H  
ATOM    643  H21  DG A  20     -27.415  15.944 -44.270  3.00  0.00           H  
ATOM    644  H3'  DG A  20     -24.426  22.374 -40.070  0.00  0.00           H  
ATOM    645  H22  DG A  20     -27.305  17.687 -44.080  5.00  0.00           H  
ATOM    646  H4'  DG A  20     -21.983  21.912 -41.400  3.00  0.00           H  
ATOM    647  H5'  DG A  20     -22.264  23.035 -39.340  4.00  0.00           H  
ATOM    648 H2''  DG A  20     -25.614  20.212 -41.420  1.00  0.00           H  
ATOM    649 H5''  DG A  20     -22.940  21.506 -38.490  8.00  0.00           H  
ATOM    650  P    DG A  21     -24.373  23.961 -42.320  9.00  0.00           P  
ATOM    651  C5'  DG A  21     -26.811  24.156 -41.550  6.00  0.00           C  
ATOM    652  O5'  DG A  21     -25.463  24.533 -41.290  4.00  0.00           O  
ATOM    653  C4'  DG A  21     -27.699  24.445 -40.290  3.00  0.00           C  
ATOM    654  O4'  DG A  21     -28.844  23.597 -40.500  0.00  0.00           O  
ATOM    655  C3'  DG A  21     -27.079  23.998 -38.980  4.00  0.00           C  
ATOM    656  O3'  DG A  21     -27.709  24.579 -37.820  4.00  0.00           O  
ATOM    657  C2'  DG A  21     -27.307  22.524 -39.130  0.00  0.00           C  
ATOM    658  C1'  DG A  21     -28.730  22.555 -39.610  1.00  0.00           C  
ATOM    659  N1   DG A  21     -28.421  17.348 -40.080  8.00  0.00           N  
ATOM    660  C2   DG A  21     -27.573  18.224 -39.430  7.00  0.00           C  
ATOM    661  N2   DG A  21     -26.683  17.556 -38.780  3.00  0.00           N  
ATOM    662  N3   DG A  21     -27.856  19.543 -39.350  6.00  0.00           N  
ATOM    663  C4   DG A  21     -28.896  19.976 -40.060  9.00  0.00           C  
ATOM    664  C5   DG A  21     -29.684  19.197 -40.880  6.00  0.00           C  
ATOM    665  C6   DG A  21     -29.469  17.757 -40.930  5.00  0.00           C  
ATOM    666  O6   DG A  21     -30.090  16.830 -41.520  8.00  0.00           O  
ATOM    667  N7   DG A  21     -30.631  20.064 -41.530  1.00  0.00           N  
ATOM    668  C8   DG A  21     -30.307  21.243 -41.110  6.00  0.00           C  
ATOM    669  N9   DG A  21     -29.181  21.337 -40.320  2.00  0.00           N  
ATOM    670  OP1  DG A  21     -24.778  24.299 -43.700  4.00  0.00           O  
ATOM    671  OP2  DG A  21     -23.024  24.425 -41.830  2.00  0.00           O1-
ATOM    672  H1   DG A  21     -28.144  16.344 -39.970  9.00  0.00           H  
ATOM    673  H8   DG A  21     -30.933  22.070 -41.460  0.00  0.00           H  
ATOM    674  H1'  DG A  21     -29.399  22.736 -38.730  2.00  0.00           H  
ATOM    675  H2'  DG A  21     -26.603  22.100 -39.890  2.00  0.00           H  
ATOM    676  H21  DG A  21     -26.747  16.573 -38.850  4.00  0.00           H  
ATOM    677  H3'  DG A  21     -26.031  24.281 -38.810  0.00  0.00           H  
ATOM    678  H22  DG A  21     -26.201  18.102 -38.020  4.00  0.00           H  
ATOM    679  H4'  DG A  21     -28.019  25.517 -40.210  5.00  0.00           H  
ATOM    680  H5'  DG A  21     -26.877  23.128 -41.770  6.00  0.00           H  
ATOM    681 H2''  DG A  21     -27.276  21.938 -38.230  7.00  0.00           H  
ATOM    682 H5''  DG A  21     -27.111  24.671 -42.450  1.00  0.00           H  
ATOM    683  P    DT A  22     -27.086  24.632 -36.380  8.00  0.00           P  
ATOM    684  C5'  DT A  22     -28.890  22.790 -35.580  0.00  0.00           C  
ATOM    685  O5'  DT A  22     -27.568  23.238 -35.710  0.00  0.00           O  
ATOM    686  C4'  DT A  22     -29.000  21.421 -34.820  5.00  0.00           C  
ATOM    687  O4'  DT A  22     -30.122  20.576 -35.210  0.00  0.00           O  
ATOM    688  C3'  DT A  22     -27.759  20.565 -34.970  9.00  0.00           C  
ATOM    689  O3'  DT A  22     -27.751  19.850 -33.750  4.00  0.00           O  
ATOM    690  C2'  DT A  22     -28.056  19.633 -36.120  5.00  0.00           C  
ATOM    691  C1'  DT A  22     -29.554  19.358 -35.740  7.00  0.00           C  
ATOM    692  N1   DT A  22     -30.195  18.872 -37.020  8.00  0.00           N  
ATOM    693  C2   DT A  22     -30.183  17.448 -37.230  3.00  0.00           C  
ATOM    694  O2   DT A  22     -29.364  16.615 -36.780  7.00  0.00           O  
ATOM    695  N3   DT A  22     -31.113  16.960 -38.100  7.00  0.00           N  
ATOM    696  C4   DT A  22     -32.040  17.727 -38.760  1.00  0.00           C  
ATOM    697  O4   DT A  22     -32.953  17.025 -39.250  8.00  0.00           O  
ATOM    698  C5   DT A  22     -32.065  19.179 -38.440  8.00  0.00           C  
ATOM    699  C6   DT A  22     -31.077  19.728 -37.630  2.00  0.00           C  
ATOM    700  C7   DT A  22     -33.243  20.016 -38.990  4.00  0.00           C  
ATOM    701  OP1  DT A  22     -27.771  25.703 -35.650  5.00  0.00           O  
ATOM    702  OP2  DT A  22     -25.653  24.693 -36.500  0.00  0.00           O1-
ATOM    703  H3   DT A  22     -31.038  16.028 -38.420  2.00  0.00           H  
ATOM    704  H6   DT A  22     -31.099  20.768 -37.370  8.00  0.00           H  
ATOM    705  H1'  DT A  22     -29.718  18.589 -34.890  9.00  0.00           H  
ATOM    706  H2'  DT A  22     -27.946  20.201 -36.990  9.00  0.00           H  
ATOM    707  H3'  DT A  22     -26.796  21.045 -35.120  0.00  0.00           H  
ATOM    708  H4'  DT A  22     -29.211  21.570 -33.810  1.00  0.00           H  
ATOM    709  H5'  DT A  22     -29.225  22.587 -36.580  6.00  0.00           H  
ATOM    710  H71  DT A  22     -33.159  21.005 -38.560  0.00  0.00           H  
ATOM    711  H72  DT A  22     -33.341  19.946 -40.130  3.00  0.00           H  
ATOM    712  H73  DT A  22     -34.124  19.604 -38.500  4.00  0.00           H  
ATOM    713 H2''  DT A  22     -27.527  18.698 -36.260  3.00  0.00           H  
ATOM    714 H5''  DT A  22     -29.552  23.486 -35.080  8.00  0.00           H  
ATOM    715  P    DT A  23     -26.445  19.041 -33.220  6.00  0.00           P  
ATOM    716  C5'  DT A  23     -27.300  16.628 -34.000  6.00  0.00           C  
ATOM    717  O5'  DT A  23     -26.323  17.682 -33.980  0.00  0.00           O  
ATOM    718  C4'  DT A  23     -27.098  15.660 -32.860  8.00  0.00           C  
ATOM    719  O4'  DT A  23     -28.264  14.892 -32.580  5.00  0.00           O  
ATOM    720  C3'  DT A  23     -26.090  14.594 -33.090  7.00  0.00           C  
ATOM    721  O3'  DT A  23     -25.502  14.297 -31.820  2.00  0.00           O  
ATOM    722  C2'  DT A  23     -26.864  13.410 -33.750  8.00  0.00           C  
ATOM    723  C1'  DT A  23     -28.115  13.477 -32.880  3.00  0.00           C  
ATOM    724  N1   DT A  23     -29.333  13.003 -33.670  3.00  0.00           N  
ATOM    725  C2   DT A  23     -29.878  11.851 -33.100  4.00  0.00           C  
ATOM    726  O2   DT A  23     -29.290  11.084 -32.300  1.00  0.00           O  
ATOM    727  N3   DT A  23     -31.163  11.611 -33.440  3.00  0.00           N  
ATOM    728  C4   DT A  23     -31.815  12.179 -34.500  7.00  0.00           C  
ATOM    729  O4   DT A  23     -32.950  11.831 -34.810  2.00  0.00           O  
ATOM    730  C5   DT A  23     -31.090  13.236 -35.200  1.00  0.00           C  
ATOM    731  C6   DT A  23     -29.842  13.609 -34.790  2.00  0.00           C  
ATOM    732  C7   DT A  23     -31.733  13.910 -36.380  2.00  0.00           C  
ATOM    733  OP1  DT A  23     -26.788  18.629 -31.760  1.00  0.00           O  
ATOM    734  OP2  DT A  23     -25.270  19.861 -33.530  0.00  0.00           O1-
ATOM    735  H3   DT A  23     -31.543  10.778 -33.000  6.00  0.00           H  
ATOM    736  H6   DT A  23     -29.319  14.389 -35.320  5.00  0.00           H  
ATOM    737  H1'  DT A  23     -27.998  12.903 -31.940  4.00  0.00           H  
ATOM    738  H2'  DT A  23     -27.004  13.623 -34.850  3.00  0.00           H  
ATOM    739  H3'  DT A  23     -25.268  14.964 -33.710  2.00  0.00           H  
ATOM    740  H4'  DT A  23     -26.805  16.103 -31.950  2.00  0.00           H  
ATOM    741  H5'  DT A  23     -27.188  16.085 -34.910  5.00  0.00           H  
ATOM    742  H71  DT A  23     -31.050  14.776 -36.590  1.00  0.00           H  
ATOM    743  H72  DT A  23     -31.840  13.169 -37.220  4.00  0.00           H  
ATOM    744  H73  DT A  23     -32.676  14.291 -36.010  2.00  0.00           H  
ATOM    745 H2''  DT A  23     -26.313  12.522 -33.560  5.00  0.00           H  
ATOM    746 H5''  DT A  23     -28.273  17.068 -33.930  1.00  0.00           H  
ATOM    747  P    DA A  24     -24.090  13.829 -31.600  7.00  0.00           P  
ATOM    748  C5'  DA A  24     -24.770  11.240 -31.050  5.00  0.00           C  
ATOM    749  O5'  DA A  24     -24.138  12.189 -31.930  6.00  0.00           O  
ATOM    750  C4'  DA A  24     -25.098   9.962 -31.820  1.00  0.00           C  
ATOM    751  O4'  DA A  24     -26.415  10.027 -32.410  4.00  0.00           O  
ATOM    752  C3'  DA A  24     -24.164   9.373 -32.870  6.00  0.00           C  
ATOM    753  O3'  DA A  24     -23.676   8.020 -32.670  3.00  0.00           O  
ATOM    754  C2'  DA A  24     -25.142   9.426 -34.020  2.00  0.00           C  
ATOM    755  C1'  DA A  24     -26.442   9.078 -33.420  8.00  0.00           C  
ATOM    756  N1   DA A  24     -29.098  11.346 -37.300  7.00  0.00           N  
ATOM    757  C2   DA A  24     -27.966  11.651 -36.700  4.00  0.00           C  
ATOM    758  N3   DA A  24     -27.280  10.965 -35.790  9.00  0.00           N  
ATOM    759  C4   DA A  24     -27.987   9.940 -35.250  1.00  0.00           C  
ATOM    760  C5   DA A  24     -29.284   9.614 -35.660  8.00  0.00           C  
ATOM    761  C6   DA A  24     -29.739  10.306 -36.830  3.00  0.00           C  
ATOM    762  N6   DA A  24     -30.873   9.993 -37.430  2.00  0.00           N  
ATOM    763  N7   DA A  24     -29.732   8.502 -34.870  9.00  0.00           N  
ATOM    764  C8   DA A  24     -28.755   8.353 -33.990  2.00  0.00           C  
ATOM    765  N9   DA A  24     -27.674   9.142 -34.170  2.00  0.00           N  
ATOM    766  OP1  DA A  24     -23.670  13.992 -30.160  5.00  0.00           O  
ATOM    767  OP2  DA A  24     -23.211  14.388 -32.640  5.00  0.00           O1-
ATOM    768  H2   DA A  24     -27.504  12.448 -37.160  8.00  0.00           H  
ATOM    769  H8   DA A  24     -28.836   7.650 -33.150  0.00  0.00           H  
ATOM    770  H1'  DA A  24     -26.414   8.011 -32.990  8.00  0.00           H  
ATOM    771  H2'  DA A  24     -25.201  10.434 -34.360  1.00  0.00           H  
ATOM    772  H3'  DA A  24     -23.284  10.100 -33.090  3.00  0.00           H  
ATOM    773  H4'  DA A  24     -25.104   9.168 -30.990  4.00  0.00           H  
ATOM    774  H5'  DA A  24     -25.671  11.741 -30.780  0.00  0.00           H  
ATOM    775  H61  DA A  24     -31.190  10.446 -38.300  3.00  0.00           H  
ATOM    776  H62  DA A  24     -31.441   9.265 -37.020  7.00  0.00           H  
ATOM    777 H2''  DA A  24     -24.813   8.758 -34.830  3.00  0.00           H  
ATOM    778 H5''  DA A  24     -24.090  10.994 -30.210  0.00  0.00           H  
ATOM    779  P    DG A  25     -22.765   7.285 -33.770  8.00  0.00           P  
ATOM    780  C5'  DG A  25     -24.687   5.643 -34.450  4.00  0.00           C  
ATOM    781  O5'  DG A  25     -23.879   6.716 -34.820  4.00  0.00           O  
ATOM    782  C4'  DG A  25     -25.876   5.324 -35.360  2.00  0.00           C  
ATOM    783  O4'  DG A  25     -26.834   6.347 -35.470  1.00  0.00           O  
ATOM    784  C3'  DG A  25     -25.549   4.910 -36.820  7.00  0.00           C  
ATOM    785  O3'  DG A  25     -25.253   3.534 -36.900  8.00  0.00           O  
ATOM    786  C2'  DG A  25     -26.875   5.275 -37.480  0.00  0.00           C  
ATOM    787  C1'  DG A  25     -27.288   6.554 -36.760  5.00  0.00           C  
ATOM    788  N1   DG A  25     -28.250  10.270 -40.130  4.00  0.00           N  
ATOM    789  C2   DG A  25     -28.864   9.066 -39.890  8.00  0.00           C  
ATOM    790  N2   DG A  25     -30.073   8.883 -40.410  4.00  0.00           N  
ATOM    791  N3   DG A  25     -28.440   8.144 -39.040  5.00  0.00           N  
ATOM    792  C4   DG A  25     -27.239   8.421 -38.490  4.00  0.00           C  
ATOM    793  C5   DG A  25     -26.462   9.564 -38.670  1.00  0.00           C  
ATOM    794  C6   DG A  25     -26.975  10.533 -39.540  8.00  0.00           C  
ATOM    795  O6   DG A  25     -26.425  11.569 -39.810  9.00  0.00           O  
ATOM    796  N7   DG A  25     -25.239   9.448 -38.010  4.00  0.00           N  
ATOM    797  C8   DG A  25     -25.380   8.269 -37.380  6.00  0.00           C  
ATOM    798  N9   DG A  25     -26.646   7.761 -37.460  1.00  0.00           N  
ATOM    799  OP1  DG A  25     -22.197   6.143 -33.090  1.00  0.00           O  
ATOM    800  OP2  DG A  25     -21.843   8.202 -34.490  3.00  0.00           O1-
ATOM    801  H1   DG A  25     -28.612  11.066 -40.660  5.00  0.00           H  
ATOM    802  H8   DG A  25     -24.652   7.616 -36.840  5.00  0.00           H  
ATOM    803  H1'  DG A  25     -28.382   6.655 -36.810  2.00  0.00           H  
ATOM    804  H2'  DG A  25     -26.709   5.409 -38.550  1.00  0.00           H  
ATOM    805  H21  DG A  25     -30.517   9.634 -40.950  8.00  0.00           H  
ATOM    806  H3'  DG A  25     -24.659   5.553 -37.130  2.00  0.00           H  
ATOM    807  H22  DG A  25     -30.603   8.046 -40.200  2.00  0.00           H  
ATOM    808  H4'  DG A  25     -26.341   4.370 -34.880  7.00  0.00           H  
ATOM    809  H5'  DG A  25     -25.051   5.790 -33.430  0.00  0.00           H  
ATOM    810 H2''  DG A  25     -27.604   4.566 -37.250  4.00  0.00           H  
ATOM    811 H5''  DG A  25     -24.036   4.810 -34.490  3.00  0.00           H  
ATOM    812  P    DG A  26     -24.427   2.908 -38.110  4.00  0.00           P  
ATOM    813  C5'  DG A  26     -26.809   2.192 -39.070  0.00  0.00           C  
ATOM    814  O5'  DG A  26     -25.472   2.756 -39.250  6.00  0.00           O  
ATOM    815  C4'  DG A  26     -27.656   2.115 -40.340  2.00  0.00           C  
ATOM    816  O4'  DG A  26     -28.105   3.431 -40.790  6.00  0.00           O  
ATOM    817  C3'  DG A  26     -26.900   1.472 -41.480  7.00  0.00           C  
ATOM    818  O3'  DG A  26     -27.776   0.680 -42.220  0.00  0.00           O  
ATOM    819  C2'  DG A  26     -26.515   2.678 -42.240  7.00  0.00           C  
ATOM    820  C1'  DG A  26     -27.670   3.642 -42.130  5.00  0.00           C  
ATOM    821  N1   DG A  26     -24.893   7.988 -41.230  9.00  0.00           N  
ATOM    822  C2   DG A  26     -24.648   6.691 -40.720  4.00  0.00           C  
ATOM    823  N2   DG A  26     -23.841   6.471 -39.760  0.00  0.00           N  
ATOM    824  N3   DG A  26     -25.514   5.662 -40.990  3.00  0.00           N  
ATOM    825  C4   DG A  26     -26.520   5.958 -41.770  6.00  0.00           C  
ATOM    826  C5   DG A  26     -26.772   7.147 -42.390  7.00  0.00           C  
ATOM    827  C6   DG A  26     -25.942   8.298 -42.060  0.00  0.00           C  
ATOM    828  O6   DG A  26     -26.178   9.484 -42.380  9.00  0.00           O  
ATOM    829  N7   DG A  26     -27.902   7.072 -43.210  3.00  0.00           N  
ATOM    830  C8   DG A  26     -28.285   5.847 -43.080  6.00  0.00           C  
ATOM    831  N9   DG A  26     -27.376   5.045 -42.430  7.00  0.00           N  
ATOM    832  OP1  DG A  26     -23.981   1.550 -37.590  6.00  0.00           O  
ATOM    833  OP2  DG A  26     -23.445   3.863 -38.590  3.00  0.00           O1-
ATOM    834  H1   DG A  26     -24.473   8.813 -40.770  8.00  0.00           H  
ATOM    835  H8   DG A  26     -29.181   5.444 -43.530  8.00  0.00           H  
ATOM    836  H1'  DG A  26     -28.486   3.311 -42.810  5.00  0.00           H  
ATOM    837  H2'  DG A  26     -25.635   3.123 -41.760  4.00  0.00           H  
ATOM    838  H21  DG A  26     -23.227   7.207 -39.400  5.00  0.00           H  
ATOM    839  H3'  DG A  26     -26.096   0.868 -41.180  7.00  0.00           H  
ATOM    840  H22  DG A  26     -23.906   5.634 -39.200  2.00  0.00           H  
ATOM    841  H4'  DG A  26     -28.543   1.556 -40.170  1.00  0.00           H  
ATOM    842  H5'  DG A  26     -27.406   2.718 -38.320  8.00  0.00           H  
ATOM    843 H2''  DG A  26     -26.258   2.483 -43.270  4.00  0.00           H  
ATOM    844 H5''  DG A  26     -26.668   1.197 -38.750  0.00  0.00           H  
ATOM    845  P    DG A  27     -27.391  -0.581 -43.130  2.00  0.00           P  
ATOM    846  C5'  DG A  27     -28.308   0.441 -45.400  2.00  0.00           C  
ATOM    847  O5'  DG A  27     -27.216   0.043 -44.580  6.00  0.00           O  
ATOM    848  C4'  DG A  27     -27.772   1.184 -46.720  2.00  0.00           C  
ATOM    849  O4'  DG A  27     -27.293   2.519 -46.390  1.00  0.00           O  
ATOM    850  C3'  DG A  27     -26.628   0.440 -47.460  0.00  0.00           C  
ATOM    851  O3'  DG A  27     -26.994   0.613 -48.870  1.00  0.00           O  
ATOM    852  C2'  DG A  27     -25.464   1.395 -47.250  7.00  0.00           C  
ATOM    853  C1'  DG A  27     -26.161   2.773 -47.100  7.00  0.00           C  
ATOM    854  N1   DG A  27     -25.643   7.717 -45.760  3.00  0.00           N  
ATOM    855  C2   DG A  27     -26.492   7.193 -46.670  8.00  0.00           C  
ATOM    856  N2   DG A  27     -27.411   7.976 -47.110  6.00  0.00           N  
ATOM    857  N3   DG A  27     -26.576   5.897 -46.910  7.00  0.00           N  
ATOM    858  C4   DG A  27     -25.650   5.146 -46.220  2.00  0.00           C  
ATOM    859  C5   DG A  27     -24.719   5.643 -45.330  9.00  0.00           C  
ATOM    860  C6   DG A  27     -24.713   7.031 -45.020  5.00  0.00           C  
ATOM    861  O6   DG A  27     -23.927   7.651 -44.330  8.00  0.00           O  
ATOM    862  N7   DG A  27     -23.946   4.568 -44.780  5.00  0.00           N  
ATOM    863  C8   DG A  27     -24.322   3.510 -45.420  6.00  0.00           C  
ATOM    864  N9   DG A  27     -25.431   3.703 -46.280  2.00  0.00           N  
ATOM    865  OP1  DG A  27     -28.599  -1.402 -43.120  2.00  0.00           O  
ATOM    866  OP2  DG A  27     -26.030  -1.022 -42.780  2.00  0.00           O1-
ATOM    867  H1   DG A  27     -25.799   8.667 -45.560  8.00  0.00           H  
ATOM    868  H8   DG A  27     -23.950   2.496 -45.220  6.00  0.00           H  
ATOM    869  H1'  DG A  27     -26.406   3.034 -48.130  1.00  0.00           H  
ATOM    870  H2'  DG A  27     -24.882   1.020 -46.350  7.00  0.00           H  
ATOM    871  H21  DG A  27     -27.269   8.962 -46.960  3.00  0.00           H  
ATOM    872  H3'  DG A  27     -26.438  -0.466 -47.010  7.00  0.00           H  
ATOM    873  H22  DG A  27     -28.178   7.528 -47.660  0.00  0.00           H  
ATOM    874  H4'  DG A  27     -28.632   1.345 -47.390  8.00  0.00           H  
ATOM    875  H5'  DG A  27     -28.977   1.080 -44.760  9.00  0.00           H  
ATOM    876 H2''  DG A  27     -24.767   1.334 -48.130  8.00  0.00           H  
ATOM    877 H5''  DG A  27     -28.869  -0.380 -45.660  8.00  0.00           H  
ATOM    878  P    DT A  28     -26.266  -0.129 -50.030  7.00  0.00           P  
ATOM    879  C5'  DT A  28     -25.164   0.993 -52.190  8.00  0.00           C  
ATOM    880  O5'  DT A  28     -25.410   1.023 -50.850  5.00  0.00           O  
ATOM    881  C4'  DT A  28     -24.683   2.332 -52.760  2.00  0.00           C  
ATOM    882  O4'  DT A  28     -25.659   3.420 -52.590  6.00  0.00           O  
ATOM    883  C3'  DT A  28     -23.316   2.818 -52.240  5.00  0.00           C  
ATOM    884  O3'  DT A  28     -22.611   3.427 -53.300  8.00  0.00           O  
ATOM    885  C2'  DT A  28     -23.747   3.907 -51.260  0.00  0.00           C  
ATOM    886  C1'  DT A  28     -25.092   4.457 -51.820  4.00  0.00           C  
ATOM    887  N1   DT A  28     -26.227   4.923 -50.840  1.00  0.00           N  
ATOM    888  C2   DT A  28     -26.423   6.271 -50.650  4.00  0.00           C  
ATOM    889  O2   DT A  28     -25.680   7.150 -51.100  0.00  0.00           O  
ATOM    890  N3   DT A  28     -27.495   6.582 -49.870  8.00  0.00           N  
ATOM    891  C4   DT A  28     -28.436   5.687 -49.350  5.00  0.00           C  
ATOM    892  O4   DT A  28     -29.347   6.093 -48.680  8.00  0.00           O  
ATOM    893  C5   DT A  28     -28.266   4.321 -49.770  2.00  0.00           C  
ATOM    894  C6   DT A  28     -27.100   3.948 -50.400  9.00  0.00           C  
ATOM    895  C7   DT A  28     -29.279   3.196 -49.500  2.00  0.00           C  
ATOM    896  OP1  DT A  28     -27.350  -0.631 -50.820  0.00  0.00           O  
ATOM    897  OP2  DT A  28     -25.391  -1.095 -49.410  4.00  0.00           O1-
ATOM    898  H3   DT A  28     -27.635   7.586 -49.730  3.00  0.00           H  
ATOM    899  H6   DT A  28     -26.951   2.899 -50.610  1.00  0.00           H  
ATOM    900  H1'  DT A  28     -24.934   5.334 -52.480  8.00  0.00           H  
ATOM    901  H2'  DT A  28     -23.953   3.458 -50.330  7.00  0.00           H  
ATOM    902  H3'  DT A  28     -22.721   2.045 -51.820  5.00  0.00           H  
ATOM    903  H4'  DT A  28     -24.696   2.217 -53.870  4.00  0.00           H  
ATOM    904  H5'  DT A  28     -26.045   0.761 -52.700  1.00  0.00           H  
ATOM    905  H71  DT A  28     -30.243   3.343 -49.970  4.00  0.00           H  
ATOM    906  H72  DT A  28     -28.962   2.218 -49.820  2.00  0.00           H  
ATOM    907  H73  DT A  28     -29.524   3.172 -48.420  2.00  0.00           H  
ATOM    908 H2''  DT A  28     -23.039   4.754 -51.180  5.00  0.00           H  
ATOM    909 H5''  DT A  28     -24.465   0.173 -52.390  9.00  0.00           H  
ATOM    910  P    DT A  29     -21.668   2.519 -54.230  9.00  0.00           P  
ATOM    911  C5'  DT A  29     -19.631   3.769 -53.170  5.00  0.00           C  
ATOM    912  O5'  DT A  29     -20.361   2.573 -53.380  7.00  0.00           O  
ATOM    913  C4'  DT A  29     -18.619   3.758 -52.010  2.00  0.00           C  
ATOM    914  O4'  DT A  29     -18.376   5.049 -51.490  1.00  0.00           O  
ATOM    915  C3'  DT A  29     -19.163   3.005 -50.690  7.00  0.00           C  
ATOM    916  O3'  DT A  29     -18.139   2.504 -49.930  7.00  0.00           O  
ATOM    917  C2'  DT A  29     -19.929   4.129 -50.010  0.00  0.00           C  
ATOM    918  C1'  DT A  29     -18.987   5.298 -50.220  2.00  0.00           C  
ATOM    919  N1   DT A  29     -19.611   6.552 -50.200  2.00  0.00           N  
ATOM    920  C2   DT A  29     -19.151   7.533 -49.330  0.00  0.00           C  
ATOM    921  O2   DT A  29     -18.147   7.414 -48.580  7.00  0.00           O  
ATOM    922  N3   DT A  29     -19.685   8.747 -49.360  2.00  0.00           N  
ATOM    923  C4   DT A  29     -20.639   9.125 -50.250  9.00  0.00           C  
ATOM    924  O4   DT A  29     -21.040  10.283 -50.190  1.00  0.00           O  
ATOM    925  C5   DT A  29     -21.209   8.095 -51.080  0.00  0.00           C  
ATOM    926  C6   DT A  29     -20.621   6.882 -51.070  6.00  0.00           C  
ATOM    927  C7   DT A  29     -22.364   8.429 -52.130  9.00  0.00           C  
ATOM    928  OP1  DT A  29     -21.433   3.246 -55.490  8.00  0.00           O  
ATOM    929  OP2  DT A  29     -22.179   1.122 -54.220  5.00  0.00           O1-
ATOM    930  H3   DT A  29     -19.305   9.476 -48.770  6.00  0.00           H  
ATOM    931  H6   DT A  29     -20.960   6.072 -51.710  3.00  0.00           H  
ATOM    932  H1'  DT A  29     -18.223   5.321 -49.460  7.00  0.00           H  
ATOM    933  H2'  DT A  29     -20.930   4.335 -50.340  2.00  0.00           H  
ATOM    934  H3'  DT A  29     -19.803   2.143 -50.930  0.00  0.00           H  
ATOM    935  H4'  DT A  29     -17.812   3.183 -52.410  3.00  0.00           H  
ATOM    936  H5'  DT A  29     -20.351   4.541 -52.900  3.00  0.00           H  
ATOM    937  H71  DT A  29     -22.924   7.525 -52.220  2.00  0.00           H  
ATOM    938  H72  DT A  29     -23.135   9.108 -51.710  5.00  0.00           H  
ATOM    939  H73  DT A  29     -22.028   8.880 -53.100  5.00  0.00           H  
ATOM    940 H2''  DT A  29     -19.933   3.973 -48.900  1.00  0.00           H  
ATOM    941 H5''  DT A  29     -19.069   3.968 -54.090  8.00  0.00           H  
ATOM    942  P    DA A  30     -18.256   1.352 -48.720  8.00  0.00           P  
ATOM    943  C5'  DA A  30     -17.701   3.171 -46.840  1.00  0.00           C  
ATOM    944  O5'  DA A  30     -18.623   2.286 -47.490  4.00  0.00           O  
ATOM    945  C4'  DA A  30     -18.422   4.349 -46.180  4.00  0.00           C  
ATOM    946  O4'  DA A  30     -19.199   5.188 -47.030  2.00  0.00           O  
ATOM    947  C3'  DA A  30     -19.379   3.724 -45.050  6.00  0.00           C  
ATOM    948  O3'  DA A  30     -19.120   4.510 -43.870  1.00  0.00           O  
ATOM    949  C2'  DA A  30     -20.690   4.157 -45.590  3.00  0.00           C  
ATOM    950  C1'  DA A  30     -20.346   5.434 -46.280  8.00  0.00           C  
ATOM    951  N1   DA A  30     -22.887   9.569 -47.810  1.00  0.00           N  
ATOM    952  C2   DA A  30     -21.923   9.451 -46.870  3.00  0.00           C  
ATOM    953  N3   DA A  30     -21.347   8.342 -46.510  1.00  0.00           N  
ATOM    954  C4   DA A  30     -21.850   7.234 -47.170  4.00  0.00           C  
ATOM    955  C5   DA A  30     -22.827   7.176 -48.100  0.00  0.00           C  
ATOM    956  C6   DA A  30     -23.402   8.466 -48.310  0.00  0.00           C  
ATOM    957  N6   DA A  30     -24.291   8.804 -49.190  2.00  0.00           N  
ATOM    958  N7   DA A  30     -23.284   5.947 -48.510  7.00  0.00           N  
ATOM    959  C8   DA A  30     -22.287   5.241 -47.950  3.00  0.00           C  
ATOM    960  N9   DA A  30     -21.459   5.956 -47.150  7.00  0.00           N  
ATOM    961  OP1  DA A  30     -16.942   0.736 -48.440  7.00  0.00           O  
ATOM    962  OP2  DA A  30     -19.433   0.508 -48.970  9.00  0.00           O1-
ATOM    963  H2   DA A  30     -21.575  10.308 -46.340  3.00  0.00           H  
ATOM    964  H8   DA A  30     -22.306   4.190 -48.010  2.00  0.00           H  
ATOM    965  H1'  DA A  30     -20.100   6.090 -45.520  5.00  0.00           H  
ATOM    966  H2'  DA A  30     -21.099   3.458 -46.320  2.00  0.00           H  
ATOM    967  H3'  DA A  30     -19.253   2.640 -44.900  2.00  0.00           H  
ATOM    968  H4'  DA A  30     -17.690   5.020 -45.700  5.00  0.00           H  
ATOM    969  H5'  DA A  30     -17.031   3.588 -47.560  1.00  0.00           H  
ATOM    970  H61  DA A  30     -24.167   9.816 -49.470  7.00  0.00           H  
ATOM    971  H62  DA A  30     -24.676   8.055 -49.760  6.00  0.00           H  
ATOM    972 H2''  DA A  30     -21.408   4.335 -44.800  0.00  0.00           H  
ATOM    973 H5''  DA A  30     -17.174   2.558 -46.050  0.00  0.00           H  
ATOM    974  P    DG A  31     -19.052   3.701 -42.480  4.00  0.00           P  
ATOM    975  C5'  DG A  31     -16.793   4.852 -41.780  5.00  0.00           C  
ATOM    976  O5'  DG A  31     -18.230   4.701 -41.590  4.00  0.00           O  
ATOM    977  C4'  DG A  31     -16.125   6.013 -41.040  7.00  0.00           C  
ATOM    978  O4'  DG A  31     -16.652   7.214 -41.520  6.00  0.00           O  
ATOM    979  C3'  DG A  31     -16.516   5.934 -39.520  2.00  0.00           C  
ATOM    980  O3'  DG A  31     -15.417   6.455 -38.750  7.00  0.00           O  
ATOM    981  C2'  DG A  31     -17.684   6.865 -39.530  9.00  0.00           C  
ATOM    982  C1'  DG A  31     -17.211   7.974 -40.460  5.00  0.00           C  
ATOM    983  N1   DG A  31     -21.589   8.652 -43.190  9.00  0.00           N  
ATOM    984  C2   DG A  31     -21.061   7.471 -42.660  4.00  0.00           C  
ATOM    985  N2   DG A  31     -21.729   6.378 -42.860  3.00  0.00           N  
ATOM    986  N3   DG A  31     -19.928   7.488 -41.880  2.00  0.00           N  
ATOM    987  C4   DG A  31     -19.357   8.715 -41.690  2.00  0.00           C  
ATOM    988  C5   DG A  31     -19.956   9.875 -42.090  7.00  0.00           C  
ATOM    989  C6   DG A  31     -21.192   9.919 -42.850  2.00  0.00           C  
ATOM    990  O6   DG A  31     -21.859  10.797 -43.230  9.00  0.00           O  
ATOM    991  N7   DG A  31     -19.153  10.963 -41.700  1.00  0.00           N  
ATOM    992  C8   DG A  31     -18.176  10.417 -41.000  7.00  0.00           C  
ATOM    993  N9   DG A  31     -18.238   9.004 -40.960  2.00  0.00           N  
ATOM    994  OP1  DG A  31     -18.294   2.435 -42.670  3.00  0.00           O  
ATOM    995  OP2  DG A  31     -20.440   3.592 -41.930  8.00  0.00           O1-
ATOM    996  H1   DG A  31     -22.500   8.585 -43.640  2.00  0.00           H  
ATOM    997  H8   DG A  31     -17.418  11.087 -40.430  8.00  0.00           H  
ATOM    998  H1'  DG A  31     -16.412   8.498 -39.770  6.00  0.00           H  
ATOM    999  H2'  DG A  31     -18.578   6.279 -39.950  1.00  0.00           H  
ATOM   1000  H21  DG A  31     -22.450   6.238 -43.560  6.00  0.00           H  
ATOM   1001  H3'  DG A  31     -16.842   4.957 -39.160  1.00  0.00           H  
ATOM   1002  H22  DG A  31     -21.271   5.537 -42.450  8.00  0.00           H  
ATOM   1003  H4'  DG A  31     -15.043   6.020 -41.140  0.00  0.00           H  
ATOM   1004  H5'  DG A  31     -16.532   4.961 -42.790  9.00  0.00           H  
ATOM   1005 H2''  DG A  31     -17.874   7.241 -38.500  2.00  0.00           H  
ATOM   1006 H5''  DG A  31     -16.226   3.965 -41.410  3.00  0.00           H  
ATOM   1007  P    DG A  32     -15.232   6.090 -37.180  9.00  0.00           P  
ATOM   1008  C5'  DG A  32     -15.569   8.645 -36.660  1.00  0.00           C  
ATOM   1009  O5'  DG A  32     -15.973   7.257 -36.450  1.00  0.00           O  
ATOM   1010  C4'  DG A  32     -16.775   9.656 -36.420  2.00  0.00           C  
ATOM   1011  O4'  DG A  32     -17.721   9.673 -37.570  0.00  0.00           O  
ATOM   1012  C3'  DG A  32     -17.674   9.293 -35.180  5.00  0.00           C  
ATOM   1013  O3'  DG A  32     -18.076  10.354 -34.410  8.00  0.00           O  
ATOM   1014  C2'  DG A  32     -18.847   8.696 -35.970  8.00  0.00           C  
ATOM   1015  C1'  DG A  32     -18.989   9.705 -37.040  6.00  0.00           C  
ATOM   1016  N1   DG A  32     -22.443  12.190 -39.810  7.00  0.00           N  
ATOM   1017  C2   DG A  32     -21.446  12.678 -39.110  1.00  0.00           C  
ATOM   1018  N2   DG A  32     -21.299  13.973 -39.180  3.00  0.00           N  
ATOM   1019  N3   DG A  32     -20.472  11.927 -38.570  7.00  0.00           N  
ATOM   1020  C4   DG A  32     -20.753  10.604 -38.600  5.00  0.00           C  
ATOM   1021  C5   DG A  32     -21.842  10.015 -39.180  9.00  0.00           C  
ATOM   1022  C6   DG A  32     -22.748  10.836 -39.920  8.00  0.00           C  
ATOM   1023  O6   DG A  32     -23.718  10.504 -40.630  8.00  0.00           O  
ATOM   1024  N7   DG A  32     -21.774   8.619 -39.080  6.00  0.00           N  
ATOM   1025  C8   DG A  32     -20.704   8.368 -38.430  1.00  0.00           C  
ATOM   1026  N9   DG A  32     -20.079   9.556 -38.000  8.00  0.00           N  
ATOM   1027  OP1  DG A  32     -13.803   6.248 -36.860  9.00  0.00           O  
ATOM   1028  OP2  DG A  32     -15.959   4.838 -36.910  3.00  0.00           O1-
ATOM   1029  H1   DG A  32     -23.133  12.809 -40.090  9.00  0.00           H  
ATOM   1030  H8   DG A  32     -20.368   7.337 -38.070  6.00  0.00           H  
ATOM   1031  H1'  DG A  32     -19.187  10.697 -36.620  7.00  0.00           H  
ATOM   1032  H2'  DG A  32     -18.566   7.769 -36.440  8.00  0.00           H  
ATOM   1033  H21  DG A  32     -21.956  14.582 -39.740  3.00  0.00           H  
ATOM   1034  H3'  DG A  32     -17.182   8.518 -34.580  5.00  0.00           H  
ATOM   1035  H22  DG A  32     -20.432  14.271 -38.780  1.00  0.00           H  
ATOM   1036  H4'  DG A  32     -16.353  10.722 -36.310  4.00  0.00           H  
ATOM   1037  H5'  DG A  32     -15.125   8.771 -37.640  7.00  0.00           H  
ATOM   1038 H2''  DG A  32     -19.723   8.755 -35.370  9.00  0.00           H  
ATOM   1039 H5''  DG A  32     -14.811   8.902 -35.900  9.00  0.00           H  
ATOM   1040  P    DG A  33     -17.717  10.378 -32.910  4.00  0.00           P  
ATOM   1041  C5'  DG A  33     -17.909  13.047 -32.600  3.00  0.00           C  
ATOM   1042  O5'  DG A  33     -18.426  11.711 -32.390  1.00  0.00           O  
ATOM   1043  C4'  DG A  33     -18.112  13.456 -34.090  2.00  0.00           C  
ATOM   1044  O4'  DG A  33     -19.500  13.296 -34.470  3.00  0.00           O  
ATOM   1045  C3'  DG A  33     -17.618  14.795 -34.640  5.00  0.00           C  
ATOM   1046  O3'  DG A  33     -16.902  15.580 -33.710  9.00  0.00           O  
ATOM   1047  C2'  DG A  33     -18.953  15.431 -35.040  3.00  0.00           C  
ATOM   1048  C1'  DG A  33     -19.812  14.227 -35.430  7.00  0.00           C  
ATOM   1049  N1   DG A  33     -24.384  12.339 -36.560  6.00  0.00           N  
ATOM   1050  C2   DG A  33     -23.213  11.763 -36.210  0.00  0.00           C  
ATOM   1051  N2   DG A  33     -23.155  10.434 -36.310  6.00  0.00           N  
ATOM   1052  N3   DG A  33     -22.176  12.324 -35.670  0.00  0.00           N  
ATOM   1053  C4   DG A  33     -22.271  13.664 -35.670  2.00  0.00           C  
ATOM   1054  C5   DG A  33     -23.417  14.399 -36.040  1.00  0.00           C  
ATOM   1055  C6   DG A  33     -24.550  13.679 -36.450  9.00  0.00           C  
ATOM   1056  O6   DG A  33     -25.632  14.093 -36.800  6.00  0.00           O  
ATOM   1057  N7   DG A  33     -23.129  15.793 -35.890  3.00  0.00           N  
ATOM   1058  C8   DG A  33     -21.844  15.789 -35.460  9.00  0.00           C  
ATOM   1059  N9   DG A  33     -21.273  14.546 -35.470  4.00  0.00           N  
ATOM   1060  OP1  DG A  33     -16.265  10.608 -32.790  4.00  0.00           O  
ATOM   1061  OP2  DG A  33     -18.276   9.197 -32.220  6.00  0.00           O1-
ATOM   1062  H1   DG A  33     -25.179  11.764 -36.740  4.00  0.00           H  
ATOM   1063  H8   DG A  33     -21.283  16.653 -35.170  3.00  0.00           H  
ATOM   1064  H1'  DG A  33     -19.500  13.830 -36.420  1.00  0.00           H  
ATOM   1065  H2'  DG A  33     -19.360  15.938 -34.230  6.00  0.00           H  
ATOM   1066  H21  DG A  33     -23.920   9.991 -36.910  0.00  0.00           H  
ATOM   1067  H3'  DG A  33     -16.911  14.546 -35.450  6.00  0.00           H  
ATOM   1068  H22  DG A  33     -22.357   9.961 -36.060  6.00  0.00           H  
ATOM   1069  H4'  DG A  33     -17.570  12.734 -34.600  3.00  0.00           H  
ATOM   1070  H5'  DG A  33     -16.859  13.032 -32.420  5.00  0.00           H  
ATOM   1071 H2''  DG A  33     -18.720  16.143 -35.870  9.00  0.00           H  
ATOM   1072 H5''  DG A  33     -18.395  13.759 -32.050  1.00  0.00           H  
ATOM   1073  P    DT A  34     -15.257  15.643 -33.770  6.00  0.00           P  
ATOM   1074  C5'  DT A  34     -14.787  18.022 -32.680  6.00  0.00           C  
ATOM   1075  O5'  DT A  34     -14.956  16.592 -32.520  9.00  0.00           O  
ATOM   1076  C4'  DT A  34     -14.477  18.863 -31.400  8.00  0.00           C  
ATOM   1077  O4'  DT A  34     -15.350  18.416 -30.390  8.00  0.00           O  
ATOM   1078  C3'  DT A  34     -13.105  18.417 -30.940  6.00  0.00           C  
ATOM   1079  O3'  DT A  34     -12.604  19.611 -30.380  3.00  0.00           O  
ATOM   1080  C2'  DT A  34     -13.451  17.312 -29.900  2.00  0.00           C  
ATOM   1081  C1'  DT A  34     -14.668  17.947 -29.310  2.00  0.00           C  
ATOM   1082  N1   DT A  34     -15.482  16.909 -28.620  8.00  0.00           N  
ATOM   1083  C2   DT A  34     -15.252  16.820 -27.240  1.00  0.00           C  
ATOM   1084  O2   DT A  34     -14.404  17.524 -26.690  8.00  0.00           O  
ATOM   1085  N3   DT A  34     -16.015  15.940 -26.500  5.00  0.00           N  
ATOM   1086  C4   DT A  34     -16.933  15.121 -27.040  9.00  0.00           C  
ATOM   1087  O4   DT A  34     -17.550  14.329 -26.280  9.00  0.00           O  
ATOM   1088  C5   DT A  34     -17.276  15.400 -28.480  5.00  0.00           C  
ATOM   1089  C6   DT A  34     -16.536  16.246 -29.220  1.00  0.00           C  
ATOM   1090  C7   DT A  34     -18.317  14.549 -29.120  8.00  0.00           C  
ATOM   1091  OP1  DT A  34     -14.587  16.313 -34.900  6.00  0.00           O  
ATOM   1092  OP2  DT A  34     -14.625  14.332 -33.440  5.00  0.00           O1-
ATOM   1093  H3   DT A  34     -15.764  15.888 -25.580  0.00  0.00           H  
ATOM   1094  H6   DT A  34     -16.693  16.405 -30.310  8.00  0.00           H  
ATOM   1095  H1'  DT A  34     -14.246  18.771 -28.680  2.00  0.00           H  
ATOM   1096  H2'  DT A  34     -13.751  16.397 -30.370  8.00  0.00           H  
ATOM   1097  H3'  DT A  34     -12.474  18.111 -31.770  6.00  0.00           H  
ATOM   1098  H4'  DT A  34     -14.547  19.928 -31.510  0.00  0.00           H  
ATOM   1099  H5'  DT A  34     -15.827  18.339 -33.000  0.00  0.00           H  
ATOM   1100  H71  DT A  34     -18.188  13.473 -29.130  1.00  0.00           H  
ATOM   1101  H72  DT A  34     -19.204  14.680 -28.510  8.00  0.00           H  
ATOM   1102  H73  DT A  34     -18.735  14.884 -30.150  1.00  0.00           H  
ATOM   1103 H2''  DT A  34     -12.526  17.312 -29.210  1.00  0.00           H  
ATOM   1104 H5''  DT A  34     -14.023  18.228 -33.410  1.00  0.00           H  
ATOM   1105  P    DT A  35     -11.165  20.206 -30.500  2.00  0.00           P  
ATOM   1106  C5'  DT A  35     -10.251  19.770 -28.140  8.00  0.00           C  
ATOM   1107  O5'  DT A  35     -10.235  19.404 -29.460  5.00  0.00           O  
ATOM   1108  C4'  DT A  35      -9.399  19.026 -27.160  7.00  0.00           C  
ATOM   1109  O4'  DT A  35     -10.144  17.843 -26.790  2.00  0.00           O  
ATOM   1110  C3'  DT A  35      -8.011  18.514 -27.590  2.00  0.00           C  
ATOM   1111  O3'  DT A  35      -6.938  19.135 -26.910  0.00  0.00           O  
ATOM   1112  C2'  DT A  35      -8.030  17.045 -27.130  1.00  0.00           C  
ATOM   1113  C1'  DT A  35      -9.461  16.649 -26.940  7.00  0.00           C  
ATOM   1114  N1   DT A  35     -10.000  15.892 -28.080  8.00  0.00           N  
ATOM   1115  C2   DT A  35     -10.425  14.587 -27.860  3.00  0.00           C  
ATOM   1116  O2   DT A  35     -10.494  14.149 -26.730  2.00  0.00           O  
ATOM   1117  N3   DT A  35     -10.688  13.821 -28.910  4.00  0.00           N  
ATOM   1118  C4   DT A  35     -10.694  14.200 -30.240  7.00  0.00           C  
ATOM   1119  O4   DT A  35     -11.053  13.389 -31.090  0.00  0.00           O  
ATOM   1120  C5   DT A  35     -10.199  15.579 -30.410  2.00  0.00           C  
ATOM   1121  C6   DT A  35      -9.813  16.342 -29.360  9.00  0.00           C  
ATOM   1122  C7   DT A  35      -9.872  16.179 -31.820  1.00  0.00           C  
ATOM   1123  OP1  DT A  35     -11.246  21.640 -30.190  6.00  0.00           O  
ATOM   1124  OP2  DT A  35     -10.772  19.866 -31.880  2.00  0.00           O1-
ATOM   1125  H3   DT A  35     -11.036  12.889 -28.710  2.00  0.00           H  
ATOM   1126  H6   DT A  35      -9.328  17.271 -29.530  5.00  0.00           H  
ATOM   1127  H1'  DT A  35      -9.521  16.038 -25.970  2.00  0.00           H  
ATOM   1128  H2'  DT A  35      -7.529  16.504 -27.930  7.00  0.00           H  
ATOM   1129  H3'  DT A  35      -7.857  18.496 -28.720  6.00  0.00           H  
ATOM   1130  H4'  DT A  35      -9.184  19.700 -26.390  5.00  0.00           H  
ATOM   1131  H5'  DT A  35     -11.278  19.818 -27.740  1.00  0.00           H  
ATOM   1132  H71  DT A  35      -9.098  16.963 -31.740  8.00  0.00           H  
ATOM   1133  H72  DT A  35      -9.573  15.438 -32.490  7.00  0.00           H  
ATOM   1134  H73  DT A  35     -10.793  16.539 -32.290  8.00  0.00           H  
ATOM   1135 H2''  DT A  35      -7.580  17.011 -26.150  6.00  0.00           H  
ATOM   1136 H5''  DT A  35      -9.799  20.776 -28.040  8.00  0.00           H  
ATOM   1137  P    DA A  36      -5.437  19.184 -27.500  5.00  0.00           P  
ATOM   1138  C5'  DA A  36      -4.140  17.163 -26.350  9.00  0.00           C  
ATOM   1139  O5'  DA A  36      -4.779  17.729 -27.530  4.00  0.00           O  
ATOM   1140  C4'  DA A  36      -3.657  15.738 -26.600  5.00  0.00           C  
ATOM   1141  O4'  DA A  36      -4.733  14.903 -27.020  9.00  0.00           O  
ATOM   1142  C3'  DA A  36      -2.708  15.692 -27.800  5.00  0.00           C  
ATOM   1143  O3'  DA A  36      -1.728  14.747 -27.690  5.00  0.00           O  
ATOM   1144  C2'  DA A  36      -3.507  15.107 -28.950  8.00  0.00           C  
ATOM   1145  C1'  DA A  36      -4.309  14.165 -28.120  0.00  0.00           C  
ATOM   1146  N1   DA A  36      -6.971  10.076 -29.570  3.00  0.00           N  
ATOM   1147  C2   DA A  36      -5.871  10.203 -28.860  8.00  0.00           C  
ATOM   1148  N3   DA A  36      -5.278  11.356 -28.480  5.00  0.00           N  
ATOM   1149  C4   DA A  36      -5.866  12.447 -29.030  3.00  0.00           C  
ATOM   1150  C5   DA A  36      -7.050  12.428 -29.750  9.00  0.00           C  
ATOM   1151  C6   DA A  36      -7.555  11.118 -30.050  8.00  0.00           C  
ATOM   1152  N6   DA A  36      -8.610  10.903 -30.820  3.00  0.00           N  
ATOM   1153  N7   DA A  36      -7.400  13.793 -30.000  7.00  0.00           N  
ATOM   1154  C8   DA A  36      -6.463  14.538 -29.450  8.00  0.00           C  
ATOM   1155  N9   DA A  36      -5.504  13.722 -28.890  4.00  0.00           N  
ATOM   1156  OP1  DA A  36      -4.681  20.042 -26.560  6.00  0.00           O  
ATOM   1157  OP2  DA A  36      -5.554  19.555 -28.910  7.00  0.00           O1-
ATOM   1158  H2   DA A  36      -5.441   9.252 -28.500  9.00  0.00           H  
ATOM   1159  H8   DA A  36      -6.373  15.554 -29.540  2.00  0.00           H  
ATOM   1160  H1'  DA A  36      -3.676  13.370 -27.830  9.00  0.00           H  
ATOM   1161  H2'  DA A  36      -4.184  15.805 -29.480  9.00  0.00           H  
ATOM   1162  H3'  DA A  36      -2.431  16.645 -28.160  9.00  0.00           H  
ATOM   1163  H4'  DA A  36      -3.145  15.321 -25.650  3.00  0.00           H  
ATOM   1164  H5'  DA A  36      -4.882  17.070 -25.570  0.00  0.00           H  
ATOM   1165  H61  DA A  36      -8.933   9.939 -30.940  2.00  0.00           H  
ATOM   1166  H62  DA A  36      -9.131  11.733 -31.230  9.00  0.00           H  
ATOM   1167 H2''  DA A  36      -2.843  14.599 -29.650  7.00  0.00           H  
ATOM   1168 H5''  DA A  36      -3.273  17.743 -25.920  7.00  0.00           H  
ATOM   1169  P    DG A  37      -0.377  14.819 -26.770  1.00  0.00           P  
ATOM   1170  C5'  DG A  37      -0.767  12.958 -24.960  5.00  0.00           C  
ATOM   1171  O5'  DG A  37      -0.102  13.351 -26.180  8.00  0.00           O  
ATOM   1172  C4'  DG A  37      -0.849  11.509 -24.700  9.00  0.00           C  
ATOM   1173  O4'  DG A  37      -1.645  10.910 -25.670  5.00  0.00           O  
ATOM   1174  C3'  DG A  37       0.513  10.750 -24.640  7.00  0.00           C  
ATOM   1175  O3'  DG A  37       0.543   9.994 -23.430  8.00  0.00           O  
ATOM   1176  C2'  DG A  37       0.390   9.925 -25.910  4.00  0.00           C  
ATOM   1177  C1'  DG A  37      -1.065   9.615 -25.960  0.00  0.00           C  
ATOM   1178  N1   DG A  37      -1.076   5.514 -28.970  7.00  0.00           N  
ATOM   1179  C2   DG A  37      -0.572   5.664 -27.740  8.00  0.00           C  
ATOM   1180  N2   DG A  37      -0.003   4.604 -27.230  9.00  0.00           N  
ATOM   1181  N3   DG A  37      -0.558   6.814 -27.080  8.00  0.00           N  
ATOM   1182  C4   DG A  37      -1.299   7.758 -27.700  5.00  0.00           C  
ATOM   1183  C5   DG A  37      -1.967   7.622 -28.870  6.00  0.00           C  
ATOM   1184  C6   DG A  37      -1.777   6.448 -29.660  9.00  0.00           C  
ATOM   1185  O6   DG A  37      -2.200   6.188 -30.810  4.00  0.00           O  
ATOM   1186  N7   DG A  37      -2.686   8.817 -29.160  9.00  0.00           N  
ATOM   1187  C8   DG A  37      -2.543   9.564 -28.090  3.00  0.00           C  
ATOM   1188  N9   DG A  37      -1.709   9.023 -27.190  5.00  0.00           N  
ATOM   1189  OP1  DG A  37      -0.671  15.653 -25.590  9.00  0.00           O  
ATOM   1190  OP2  DG A  37       0.751  15.156 -27.720  5.00  0.00           O1-
ATOM   1191  H1   DG A  37      -1.220   4.606 -29.230  0.00  0.00           H  
ATOM   1192  H8   DG A  37      -3.026  10.587 -28.120  2.00  0.00           H  
ATOM   1193  H1'  DG A  37      -1.298   8.984 -25.110  1.00  0.00           H  
ATOM   1194  H2'  DG A  37       0.702  10.566 -26.690  6.00  0.00           H  
ATOM   1195  H21  DG A  37      -0.079   3.737 -27.610  7.00  0.00           H  
ATOM   1196  H3'  DG A  37       1.319  11.437 -24.760  1.00  0.00           H  
ATOM   1197  H22  DG A  37       0.337   4.697 -26.270  1.00  0.00           H  
ATOM   1198  H4'  DG A  37      -1.363  11.330 -23.750  9.00  0.00           H  
ATOM   1199  H5'  DG A  37      -1.833  13.248 -25.000  5.00  0.00           H  
ATOM   1200 H2''  DG A  37       1.007   9.088 -25.980  7.00  0.00           H  
ATOM   1201 H5''  DG A  37      -0.242  13.499 -24.170  6.00  0.00           H  
ATOM   1202  P    DG A  38       1.832   9.229 -22.980  5.00  0.00           P  
ATOM   1203  C5'  DG A  38       0.727   6.875 -23.480  3.00  0.00           C  
ATOM   1204  O5'  DG A  38       1.721   7.869 -23.810  6.00  0.00           O  
ATOM   1205  C4'  DG A  38       1.160   5.484 -23.250  1.00  0.00           C  
ATOM   1206  O4'  DG A  38       1.424   4.691 -24.450  0.00  0.00           O  
ATOM   1207  C3'  DG A  38       2.395   5.429 -22.360  4.00  0.00           C  
ATOM   1208  O3'  DG A  38       2.134   4.554 -21.340  7.00  0.00           O  
ATOM   1209  C2'  DG A  38       3.415   4.857 -23.290  4.00  0.00           C  
ATOM   1210  C1'  DG A  38       2.628   3.926 -24.130  8.00  0.00           C  
ATOM   1211  N1   DG A  38       2.918   0.822 -28.160  7.00  0.00           N  
ATOM   1212  C2   DG A  38       2.034   0.899 -27.130  8.00  0.00           C  
ATOM   1213  N2   DG A  38       1.080   0.023 -27.110  4.00  0.00           N  
ATOM   1214  N3   DG A  38       2.131   1.711 -26.120  0.00  0.00           N  
ATOM   1215  C4   DG A  38       3.173   2.601 -26.230  3.00  0.00           C  
ATOM   1216  C5   DG A  38       4.129   2.594 -27.250  1.00  0.00           C  
ATOM   1217  C6   DG A  38       4.007   1.644 -28.350  3.00  0.00           C  
ATOM   1218  O6   DG A  38       4.727   1.519 -29.310  9.00  0.00           O  
ATOM   1219  N7   DG A  38       4.994   3.657 -27.060  7.00  0.00           N  
ATOM   1220  C8   DG A  38       4.542   4.170 -25.930  4.00  0.00           C  
ATOM   1221  N9   DG A  38       3.453   3.560 -25.320  7.00  0.00           N  
ATOM   1222  OP1  DG A  38       1.708   8.937 -21.570  1.00  0.00           O  
ATOM   1223  OP2  DG A  38       3.007   9.953 -23.420  4.00  0.00           O1-
ATOM   1224  H1   DG A  38       2.864   0.073 -28.830  4.00  0.00           H  
ATOM   1225  H8   DG A  38       5.096   4.932 -25.430  6.00  0.00           H  
ATOM   1226  H1'  DG A  38       2.335   3.040 -23.560  3.00  0.00           H  
ATOM   1227  H2'  DG A  38       3.806   5.687 -23.920  5.00  0.00           H  
ATOM   1228  H21  DG A  38       1.028  -0.728 -27.770  6.00  0.00           H  
ATOM   1229  H3'  DG A  38       2.708   6.414 -21.940  6.00  0.00           H  
ATOM   1230  H22  DG A  38       0.452   0.034 -26.290  1.00  0.00           H  
ATOM   1231  H4'  DG A  38       0.336   5.000 -22.720  5.00  0.00           H  
ATOM   1232  H5'  DG A  38       0.060   6.788 -24.350  6.00  0.00           H  
ATOM   1233 H2''  DG A  38       4.267   4.339 -22.850  0.00  0.00           H  
ATOM   1234 H5''  DG A  38       0.049   7.093 -22.660  9.00  0.00           H  
ATOM   1235  P    DG A  39       2.468   4.693 -19.840  6.00  0.00           P  
ATOM   1236  C5'  DG A  39       0.662   2.822 -19.620  9.00  0.00           C  
ATOM   1237  O5'  DG A  39       1.952   3.235 -19.440  5.00  0.00           O  
ATOM   1238  C4'  DG A  39       0.710   1.339 -19.970  9.00  0.00           C  
ATOM   1239  O4'  DG A  39       1.197   1.108 -21.280  8.00  0.00           O  
ATOM   1240  C3'  DG A  39       1.494   0.371 -19.070  2.00  0.00           C  
ATOM   1241  O3'  DG A  39       0.765  -0.771 -18.760  7.00  0.00           O  
ATOM   1242  C2'  DG A  39       2.679   0.145 -19.940  4.00  0.00           C  
ATOM   1243  C1'  DG A  39       2.081  -0.029 -21.320  4.00  0.00           C  
ATOM   1244  N1   DG A  39       4.093  -1.869 -25.670  5.00  0.00           N  
ATOM   1245  C2   DG A  39       3.092  -2.312 -24.950  7.00  0.00           C  
ATOM   1246  N2   DG A  39       2.519  -3.422 -25.390  2.00  0.00           N  
ATOM   1247  N3   DG A  39       2.685  -1.813 -23.830  8.00  0.00           N  
ATOM   1248  C4   DG A  39       3.341  -0.684 -23.470  8.00  0.00           C  
ATOM   1249  C5   DG A  39       4.307  -0.056 -24.210  9.00  0.00           C  
ATOM   1250  C6   DG A  39       4.714  -0.707 -25.470  2.00  0.00           C  
ATOM   1251  O6   DG A  39       5.484  -0.258 -26.350  7.00  0.00           O  
ATOM   1252  N7   DG A  39       4.623   1.176 -23.670  8.00  0.00           N  
ATOM   1253  C8   DG A  39       3.910   1.249 -22.600  3.00  0.00           C  
ATOM   1254  N9   DG A  39       3.130   0.151 -22.380  3.00  0.00           N  
ATOM   1255  OP1  DG A  39       1.535   5.693 -19.160  1.00  0.00           O  
ATOM   1256  OP2  DG A  39       3.942   4.715 -19.580  2.00  0.00           O1-
ATOM   1257  H1   DG A  39       4.334  -2.360 -26.520  2.00  0.00           H  
ATOM   1258  H8   DG A  39       3.857   2.130 -22.110  4.00  0.00           H  
ATOM   1259  H1'  DG A  39       1.616  -1.056 -21.350  5.00  0.00           H  
ATOM   1260  H2'  DG A  39       3.193   1.153 -20.000  8.00  0.00           H  
ATOM   1261  H21  DG A  39       2.826  -3.801 -26.260  8.00  0.00           H  
ATOM   1262  H3'  DG A  39       1.739   0.965 -18.170  5.00  0.00           H  
ATOM   1263  H22  DG A  39       1.748  -3.991 -25.020  0.00  0.00           H  
ATOM   1264  H4'  DG A  39      -0.295   0.937 -19.980  0.00  0.00           H  
ATOM   1265  H5'  DG A  39       0.153   3.474 -20.470  3.00  0.00           H  
ATOM   1266 H2''  DG A  39       3.352  -0.613 -19.550  8.00  0.00           H  
ATOM   1267 H5''  DG A  39       0.098   3.022 -18.690  7.00  0.00           H  
ATOM   1268  P    DT A  40       1.291  -1.754 -17.550  6.00  0.00           P  
ATOM   1269  C5'  DT A  40       0.175  -3.552 -19.040  1.00  0.00           C  
ATOM   1270  O5'  DT A  40       1.350  -3.170 -18.360  8.00  0.00           O  
ATOM   1271  C4'  DT A  40       0.229  -4.917 -19.890  2.00  0.00           C  
ATOM   1272  O4'  DT A  40       1.052  -4.818 -21.080  8.00  0.00           O  
ATOM   1273  C3'  DT A  40       0.765  -6.097 -19.120  7.00  0.00           C  
ATOM   1274  O3'  DT A  40       0.025  -7.275 -19.430  5.00  0.00           O  
ATOM   1275  C2'  DT A  40       2.242  -6.148 -19.630  6.00  0.00           C  
ATOM   1276  C1'  DT A  40       2.112  -5.675 -21.090  6.00  0.00           C  
ATOM   1277  N1   DT A  40       3.423  -4.958 -21.580  2.00  0.00           N  
ATOM   1278  C2   DT A  40       3.814  -5.264 -22.870  3.00  0.00           C  
ATOM   1279  O2   DT A  40       3.292  -6.189 -23.540  2.00  0.00           O  
ATOM   1280  N3   DT A  40       4.942  -4.604 -23.390  9.00  0.00           N  
ATOM   1281  C4   DT A  40       5.554  -3.567 -22.800  7.00  0.00           C  
ATOM   1282  O4   DT A  40       6.517  -3.033 -23.320  1.00  0.00           O  
ATOM   1283  C5   DT A  40       5.009  -3.249 -21.470  9.00  0.00           C  
ATOM   1284  C6   DT A  40       3.969  -3.897 -20.930  5.00  0.00           C  
ATOM   1285  C7   DT A  40       5.637  -2.079 -20.690  7.00  0.00           C  
ATOM   1286  OP1  DT A  40       0.210  -1.991 -16.570  6.00  0.00           O  
ATOM   1287  OP2  DT A  40       2.667  -1.381 -17.170  4.00  0.00           O1-
ATOM   1288  H3   DT A  40       5.282  -4.920 -24.280  3.00  0.00           H  
ATOM   1289  H6   DT A  40       3.589  -3.677 -19.930  5.00  0.00           H  
ATOM   1290  H1'  DT A  40       1.898  -6.515 -21.750  5.00  0.00           H  
ATOM   1291  H2'  DT A  40       2.887  -5.473 -19.040  9.00  0.00           H  
ATOM   1292  H3'  DT A  40       0.719  -5.875 -18.100  3.00  0.00           H  
ATOM   1293  H4'  DT A  40      -0.745  -5.183 -20.100  7.00  0.00           H  
ATOM   1294  H5'  DT A  40      -0.207  -2.702 -19.650  1.00  0.00           H  
ATOM   1295  H71  DT A  40       5.209  -1.124 -21.130  2.00  0.00           H  
ATOM   1296  H72  DT A  40       5.403  -2.214 -19.680  2.00  0.00           H  
ATOM   1297  H73  DT A  40       6.707  -2.079 -20.790  0.00  0.00           H  
ATOM   1298 H2''  DT A  40       2.707  -7.149 -19.500  2.00  0.00           H  
ATOM   1299 H5''  DT A  40      -0.618  -3.620 -18.280  0.00  0.00           H  
ATOM   1300  P    DT A  41       0.272  -8.581 -18.470  4.00  0.00           P  
ATOM   1301  C5'  DT A  41       1.623  -9.966 -20.290  2.00  0.00           C  
ATOM   1302  O5'  DT A  41       1.604  -9.310 -19.020  7.00  0.00           O  
ATOM   1303  C4'  DT A  41       3.004 -10.296 -20.870  7.00  0.00           C  
ATOM   1304  O4'  DT A  41       3.655  -9.123 -21.170  3.00  0.00           O  
ATOM   1305  C3'  DT A  41       3.948 -10.947 -19.750  6.00  0.00           C  
ATOM   1306  O3'  DT A  41       4.004 -12.352 -19.740  6.00  0.00           O  
ATOM   1307  C2'  DT A  41       5.308 -10.419 -20.220  0.00  0.00           C  
ATOM   1308  C1'  DT A  41       5.093  -9.352 -21.200  3.00  0.00           C  
ATOM   1309  N1   DT A  41       5.741  -8.040 -20.960  4.00  0.00           N  
ATOM   1310  C2   DT A  41       6.620  -7.504 -21.890  3.00  0.00           C  
ATOM   1311  O2   DT A  41       6.955  -8.091 -22.920  1.00  0.00           O  
ATOM   1312  N3   DT A  41       7.099  -6.229 -21.650  8.00  0.00           N  
ATOM   1313  C4   DT A  41       7.052  -5.543 -20.460  6.00  0.00           C  
ATOM   1314  O4   DT A  41       7.642  -4.465 -20.300  2.00  0.00           O  
ATOM   1315  C5   DT A  41       6.235  -6.268 -19.440  6.00  0.00           C  
ATOM   1316  C6   DT A  41       5.624  -7.416 -19.740  7.00  0.00           C  
ATOM   1317  C7   DT A  41       6.213  -5.689 -18.020  7.00  0.00           C  
ATOM   1318  OP1  DT A  41      -0.781  -9.561 -18.690  5.00  0.00           O  
ATOM   1319  OP2  DT A  41       0.558  -8.146 -17.090  4.00  0.00           O1-
ATOM   1320  H3   DT A  41       7.905  -5.925 -22.170  4.00  0.00           H  
ATOM   1321  H6   DT A  41       5.223  -7.982 -18.930  5.00  0.00           H  
ATOM   1322  H1'  DT A  41       5.412  -9.733 -22.180  9.00  0.00           H  
ATOM   1323  H2'  DT A  41       5.866 -10.038 -19.360  6.00  0.00           H  
ATOM   1324  H3'  DT A  41       3.774 -10.540 -18.810  9.00  0.00           H  
ATOM   1325  H4'  DT A  41       2.957 -10.897 -21.770  9.00  0.00           H  
ATOM   1326  H5'  DT A  41       1.043  -9.401 -21.090  3.00  0.00           H  
ATOM   1327  H71  DT A  41       5.895  -4.652 -18.300  7.00  0.00           H  
ATOM   1328  H72  DT A  41       5.457  -6.122 -17.380  8.00  0.00           H  
ATOM   1329  H73  DT A  41       7.199  -5.730 -17.660  7.00  0.00           H  
ATOM   1330 H2''  DT A  41       5.876 -11.195 -20.780  5.00  0.00           H  
ATOM   1331 H5''  DT A  41       1.093 -10.918 -20.230  5.00  0.00           H  
ATOM   1332  P    DA A  42       4.770 -13.142 -18.610  4.00  0.00           P  
ATOM   1333  C5'  DA A  42       6.982 -13.685 -19.930  7.00  0.00           C  
ATOM   1334  O5'  DA A  42       6.359 -12.991 -18.860  0.00  0.00           O  
ATOM   1335  C4'  DA A  42       8.405 -13.275 -20.100  7.00  0.00           C  
ATOM   1336  O4'  DA A  42       8.491 -11.954 -20.540  9.00  0.00           O  
ATOM   1337  C3'  DA A  42       9.299 -13.329 -18.860  1.00  0.00           C  
ATOM   1338  O3'  DA A  42      10.548 -13.950 -19.180  4.00  0.00           O  
ATOM   1339  C2'  DA A  42       9.380 -11.853 -18.440  3.00  0.00           C  
ATOM   1340  C1'  DA A  42       9.526 -11.322 -19.850  1.00  0.00           C  
ATOM   1341  N1   DA A  42      11.806  -6.783 -21.350  2.00  0.00           N  
ATOM   1342  C2   DA A  42      11.983  -8.065 -21.770  0.00  0.00           C  
ATOM   1343  N3   DA A  42      11.363  -9.156 -21.310  6.00  0.00           N  
ATOM   1344  C4   DA A  42      10.328  -8.869 -20.460  2.00  0.00           C  
ATOM   1345  C5   DA A  42       9.943  -7.638 -20.070  7.00  0.00           C  
ATOM   1346  C6   DA A  42      10.801  -6.560 -20.490  3.00  0.00           C  
ATOM   1347  N6   DA A  42      10.655  -5.294 -20.160  2.00  0.00           N  
ATOM   1348  N7   DA A  42       8.837  -7.754 -19.210  0.00  0.00           N  
ATOM   1349  C8   DA A  42       8.564  -9.037 -19.150  2.00  0.00           C  
ATOM   1350  N9   DA A  42       9.484  -9.822 -19.820  0.00  0.00           N  
ATOM   1351  OP1  DA A  42       4.392 -14.593 -18.800  7.00  0.00           O  
ATOM   1352  OP2  DA A  42       4.501 -12.467 -17.350  4.00  0.00           O1-
ATOM   1353  H2   DA A  42      12.753  -8.099 -22.410  8.00  0.00           H  
ATOM   1354  H8   DA A  42       7.745  -9.393 -18.550  4.00  0.00           H  
ATOM   1355  H1'  DA A  42      10.531 -11.573 -20.140  7.00  0.00           H  
ATOM   1356  H2'  DA A  42       8.430 -11.615 -17.850  7.00  0.00           H  
ATOM   1357  H3'  DA A  42       8.796 -13.894 -18.080  0.00  0.00           H  
ATOM   1358  H4'  DA A  42       8.813 -13.812 -20.950  5.00  0.00           H  
ATOM   1359  H5'  DA A  42       6.572 -13.523 -20.920  7.00  0.00           H  
ATOM   1360  H61  DA A  42      11.324  -4.629 -20.540  5.00  0.00           H  
ATOM   1361  H62  DA A  42       9.814  -5.031 -19.640  5.00  0.00           H  
ATOM   1362 H2''  DA A  42      10.268 -11.783 -17.790  8.00  0.00           H  
ATOM   1363 H5''  DA A  42       6.838 -14.726 -19.620  8.00  0.00           H  
ATOM   1364  P    DG A  43      11.265 -15.016 -18.270  6.00  0.00           P  
ATOM   1365  C5'  DG A  43      13.088 -15.522 -20.090  6.00  0.00           C  
ATOM   1366  O5'  DG A  43      12.736 -15.014 -18.800  0.00  0.00           O  
ATOM   1367  C4'  DG A  43      14.172 -14.796 -20.880  5.00  0.00           C  
ATOM   1368  O4'  DG A  43      13.781 -13.397 -21.110  0.00  0.00           O  
ATOM   1369  C3'  DG A  43      15.579 -14.777 -20.350  4.00  0.00           C  
ATOM   1370  O3'  DG A  43      16.531 -14.764 -21.390  4.00  0.00           O  
ATOM   1371  C2'  DG A  43      15.592 -13.462 -19.550  3.00  0.00           C  
ATOM   1372  C1'  DG A  43      14.709 -12.572 -20.400  8.00  0.00           C  
ATOM   1373  N1   DG A  43      14.301  -7.550 -19.530  2.00  0.00           N  
ATOM   1374  C2   DG A  43      14.995  -8.219 -20.420  7.00  0.00           C  
ATOM   1375  N2   DG A  43      15.745  -7.458 -21.150  9.00  0.00           N  
ATOM   1376  N3   DG A  43      14.810  -9.562 -20.670  2.00  0.00           N  
ATOM   1377  C4   DG A  43      14.065 -10.228 -19.730  3.00  0.00           C  
ATOM   1378  C5   DG A  43      13.372  -9.625 -18.690  7.00  0.00           C  
ATOM   1379  C6   DG A  43      13.427  -8.124 -18.640  3.00  0.00           C  
ATOM   1380  O6   DG A  43      12.883  -7.393 -17.810  3.00  0.00           O  
ATOM   1381  N7   DG A  43      12.812 -10.603 -17.860  5.00  0.00           N  
ATOM   1382  C8   DG A  43      13.135 -11.725 -18.480  4.00  0.00           C  
ATOM   1383  N9   DG A  43      13.995 -11.585 -19.570  0.00  0.00           N  
ATOM   1384  OP1  DG A  43      10.589 -16.278 -18.640  1.00  0.00           O  
ATOM   1385  OP2  DG A  43      11.243 -14.541 -16.840  1.00  0.00           O1-
ATOM   1386  H1   DG A  43      14.231  -6.552 -19.570  6.00  0.00           H  
ATOM   1387  H8   DG A  43      12.782 -12.667 -18.080  9.00  0.00           H  
ATOM   1388  H1'  DG A  43      15.340 -12.045 -21.150  1.00  0.00           H  
ATOM   1389  H2'  DG A  43      15.068 -13.644 -18.610  2.00  0.00           H  
ATOM   1390  H21  DG A  43      15.768  -6.468 -20.970  0.00  0.00           H  
ATOM   1391  H3'  DG A  43      15.644 -15.636 -19.660  7.00  0.00           H  
ATOM   1392  H22  DG A  43      16.169  -7.856 -21.990  7.00  0.00           H  
ATOM   1393  H4'  DG A  43      14.231 -15.217 -21.890  0.00  0.00           H  
ATOM   1394  H5'  DG A  43      12.212 -15.391 -20.650  6.00  0.00           H  
ATOM   1395 H2''  DG A  43      16.502 -13.049 -19.230  8.00  0.00           H  
ATOM   1396 H5''  DG A  43      13.382 -16.601 -20.020  8.00  0.00           H  
ATOM   1397  P    DG A  44      18.049 -14.691 -21.130  1.00  0.00           P  
ATOM   1398  C5'  DG A  44      18.448 -12.425 -22.250  0.00  0.00           C  
ATOM   1399  O5'  DG A  44      18.493 -13.218 -21.060  0.00  0.00           O  
ATOM   1400  C4'  DG A  44      18.999 -10.972 -22.110  6.00  0.00           C  
ATOM   1401  O4'  DG A  44      18.054 -10.235 -21.420  3.00  0.00           O  
ATOM   1402  C3'  DG A  44      20.397 -10.652 -21.500  7.00  0.00           C  
ATOM   1403  O3'  DG A  44      21.125  -9.676 -22.310  9.00  0.00           O  
ATOM   1404  C2'  DG A  44      20.031 -10.128 -20.150  6.00  0.00           C  
ATOM   1405  C1'  DG A  44      18.713  -9.443 -20.500  5.00  0.00           C  
ATOM   1406  N1   DG A  44      18.135  -5.839 -16.830  6.00  0.00           N  
ATOM   1407  C2   DG A  44      18.970  -5.875 -17.860  3.00  0.00           C  
ATOM   1408  N2   DG A  44      19.764  -4.911 -18.150  5.00  0.00           N  
ATOM   1409  N3   DG A  44      18.899  -6.826 -18.790  9.00  0.00           N  
ATOM   1410  C4   DG A  44      18.095  -7.884 -18.510  2.00  0.00           C  
ATOM   1411  C5   DG A  44      17.366  -7.954 -17.340  0.00  0.00           C  
ATOM   1412  C6   DG A  44      17.309  -6.863 -16.450  1.00  0.00           C  
ATOM   1413  O6   DG A  44      16.634  -6.732 -15.390  6.00  0.00           O  
ATOM   1414  N7   DG A  44      16.760  -9.249 -17.300  4.00  0.00           N  
ATOM   1415  C8   DG A  44      17.114  -9.785 -18.470  1.00  0.00           C  
ATOM   1416  N9   DG A  44      17.896  -9.022 -19.260  3.00  0.00           N  
ATOM   1417  OP1  DG A  44      18.800 -15.392 -22.260  0.00  0.00           O  
ATOM   1418  OP2  DG A  44      18.301 -15.199 -19.790  7.00  0.00           O1-
ATOM   1419  H1   DG A  44      18.022  -4.897 -16.390  5.00  0.00           H  
ATOM   1420  H8   DG A  44      16.753 -10.837 -18.730  1.00  0.00           H  
ATOM   1421  H1'  DG A  44      18.934  -8.485 -21.000  0.00  0.00           H  
ATOM   1422  H2'  DG A  44      19.915 -10.917 -19.440  4.00  0.00           H  
ATOM   1423  H21  DG A  44      19.963  -4.128 -17.560  2.00  0.00           H  
ATOM   1424  H3'  DG A  44      20.905 -11.592 -21.470  9.00  0.00           H  
ATOM   1425  H22  DG A  44      20.333  -5.045 -18.920  7.00  0.00           H  
ATOM   1426  H4'  DG A  44      19.104 -10.531 -23.070  9.00  0.00           H  
ATOM   1427  H5'  DG A  44      17.526 -12.387 -22.830  6.00  0.00           H  
ATOM   1428 H2''  DG A  44      20.710  -9.348 -19.770  2.00  0.00           H  
ATOM   1429 H5''  DG A  44      19.032 -12.957 -23.030  6.00  0.00           H  
ATOM   1430  P   DG3 A  45      22.671  -9.544 -22.390  7.00  0.00           P  
ATOM   1431  C5' DG3 A  45      22.966  -7.138 -21.240  7.00  0.00           C  
ATOM   1432  O5' DG3 A  45      23.125  -8.570 -21.170  2.00  0.00           O  
ATOM   1433  C4' DG3 A  45      23.681  -6.351 -20.170  5.00  0.00           C  
ATOM   1434  O4' DG3 A  45      22.969  -6.142 -19.030  1.00  0.00           O  
ATOM   1435  C3' DG3 A  45      25.007  -6.844 -19.760  9.00  0.00           C  
ATOM   1436  O3' DG3 A  45      25.849  -5.698 -19.560  7.00  0.00           O  
ATOM   1437  C2' DG3 A  45      24.558  -7.669 -18.510  6.00  0.00           C  
ATOM   1438  C1' DG3 A  45      23.575  -6.688 -17.870  0.00  0.00           C  
ATOM   1439  N1  DG3 A  45      20.240  -5.943 -14.050  7.00  0.00           N  
ATOM   1440  C2  DG3 A  45      21.146  -5.073 -14.620  3.00  0.00           C  
ATOM   1441  N2  DG3 A  45      21.094  -3.823 -14.220  8.00  0.00           N  
ATOM   1442  N3  DG3 A  45      22.043  -5.437 -15.480  3.00  0.00           N  
ATOM   1443  C4  DG3 A  45      21.947  -6.745 -15.930  3.00  0.00           C  
ATOM   1444  C5  DG3 A  45      21.113  -7.742 -15.410  4.00  0.00           C  
ATOM   1445  C6  DG3 A  45      20.122  -7.257 -14.410  3.00  0.00           C  
ATOM   1446  O6  DG3 A  45      19.132  -7.846 -13.930  3.00  0.00           O  
ATOM   1447  N7  DG3 A  45      21.374  -8.987 -16.060  9.00  0.00           N  
ATOM   1448  C8  DG3 A  45      22.311  -8.663 -16.900  6.00  0.00           C  
ATOM   1449  N9  DG3 A  45      22.623  -7.348 -16.950  3.00  0.00           N  
ATOM   1450  OP1 DG3 A  45      22.913  -8.908 -23.670  2.00  0.00           O  
ATOM   1451  OP2 DG3 A  45      23.325 -10.833 -22.080  3.00  0.00           O  
ATOM   1452 HO3' DG3 A  45      26.752  -5.939 -19.300  1.00  0.00           H  
ATOM   1453  H1  DG3 A  45      19.464  -5.503 -13.490  6.00  0.00           H  
ATOM   1454  H8  DG3 A  45      22.794  -9.367 -17.560  0.00  0.00           H  
ATOM   1455  H1' DG3 A  45      24.210  -5.931 -17.270  5.00  0.00           H  
ATOM   1456  H2' DG3 A  45      24.073  -8.540 -18.780  5.00  0.00           H  
ATOM   1457  H21 DG3 A  45      20.264  -3.509 -13.750  5.00  0.00           H  
ATOM   1458  H3' DG3 A  45      25.467  -7.435 -20.610  8.00  0.00           H  
ATOM   1459  H22 DG3 A  45      21.811  -3.107 -14.530  8.00  0.00           H  
ATOM   1460  H4' DG3 A  45      23.815  -5.355 -20.560  2.00  0.00           H  
ATOM   1461  H5' DG3 A  45      21.888  -6.895 -21.270  5.00  0.00           H  
ATOM   1462 H2'' DG3 A  45      25.485  -7.862 -17.890  1.00  0.00           H  
ATOM   1463 H5'' DG3 A  45      23.393  -6.821 -22.190  9.00  0.00           H  
ATOM   1464  C5' DC5 A  46      16.793   0.084  -7.630  7.00  0.00           C  
ATOM   1465  O5' DC5 A  46      15.478  -0.451  -7.590  1.00  0.00           O  
ATOM   1466  C4' DC5 A  46      17.442   0.197  -8.980  9.00  0.00           C  
ATOM   1467  O4' DC5 A  46      17.792  -1.069  -9.450  6.00  0.00           O  
ATOM   1468  C3' DC5 A  46      16.671   0.946 -10.140  4.00  0.00           C  
ATOM   1469  O3' DC5 A  46      17.524   2.007 -10.630  7.00  0.00           O  
ATOM   1470  C2' DC5 A  46      16.384  -0.264 -11.020  6.00  0.00           C  
ATOM   1471  C1' DC5 A  46      17.621  -1.065 -10.870  9.00  0.00           C  
ATOM   1472  N1  DC5 A  46      17.388  -2.502 -11.250  8.00  0.00           N  
ATOM   1473  C2  DC5 A  46      18.353  -3.079 -12.040  0.00  0.00           C  
ATOM   1474  O2  DC5 A  46      19.435  -2.558 -12.260  0.00  0.00           O  
ATOM   1475  N3  DC5 A  46      18.110  -4.381 -12.430  3.00  0.00           N  
ATOM   1476  C4  DC5 A  46      17.034  -5.039 -12.000  7.00  0.00           C  
ATOM   1477  N4  DC5 A  46      16.908  -6.303 -12.300  1.00  0.00           N  
ATOM   1478  C5  DC5 A  46      16.056  -4.403 -11.230  0.00  0.00           C  
ATOM   1479  C6  DC5 A  46      16.267  -3.117 -10.820  7.00  0.00           C  
ATOM   1480 HO5' DC5 A  46      14.908   0.281  -7.540  2.00  0.00           H  
ATOM   1481  H5  DC5 A  46      15.246  -4.952 -10.940  0.00  0.00           H  
ATOM   1482  H6  DC5 A  46      15.557  -2.741 -10.090  0.00  0.00           H  
ATOM   1483  H1' DC5 A  46      18.503  -0.517 -11.320  1.00  0.00           H  
ATOM   1484  H2' DC5 A  46      15.493  -0.754 -10.720  7.00  0.00           H  
ATOM   1485  H3' DC5 A  46      15.766   1.333  -9.650  6.00  0.00           H  
ATOM   1486  H4' DC5 A  46      18.372   0.787  -8.890  3.00  0.00           H  
ATOM   1487  H41 DC5 A  46      17.618  -6.636 -12.940  8.00  0.00           H  
ATOM   1488  H5' DC5 A  46      17.436  -0.619  -7.000  6.00  0.00           H  
ATOM   1489  H42 DC5 A  46      16.030  -6.737 -12.290  3.00  0.00           H  
ATOM   1490 H2'' DC5 A  46      16.275   0.034 -12.090  9.00  0.00           H  
ATOM   1491 H5'' DC5 A  46      16.667   0.997  -7.170  6.00  0.00           H  
ATOM   1492  P    DC A  47      17.337   2.926 -11.960  8.00  0.00           P  
ATOM   1493  C5'  DC A  47      19.472   2.215 -13.300  9.00  0.00           C  
ATOM   1494  O5'  DC A  47      18.108   2.051 -13.030  1.00  0.00           O  
ATOM   1495  C4'  DC A  47      19.889   1.594 -14.690  7.00  0.00           C  
ATOM   1496  O4'  DC A  47      19.666   0.184 -14.800  7.00  0.00           O  
ATOM   1497  C3'  DC A  47      19.202   2.215 -15.910  1.00  0.00           C  
ATOM   1498  O3'  DC A  47      20.146   2.354 -16.930  6.00  0.00           O  
ATOM   1499  C2'  DC A  47      18.083   1.235 -16.100  3.00  0.00           C  
ATOM   1500  C1'  DC A  47      18.710  -0.077 -15.780  0.00  0.00           C  
ATOM   1501  N1   DC A  47      17.747  -1.161 -15.350  4.00  0.00           N  
ATOM   1502  C2   DC A  47      18.019  -2.436 -15.760  3.00  0.00           C  
ATOM   1503  O2   DC A  47      19.071  -2.756 -16.330  2.00  0.00           O  
ATOM   1504  N3   DC A  47      17.085  -3.388 -15.580  6.00  0.00           N  
ATOM   1505  C4   DC A  47      16.006  -3.125 -14.900  3.00  0.00           C  
ATOM   1506  N4   DC A  47      15.261  -4.193 -14.730  5.00  0.00           N  
ATOM   1507  C5   DC A  47      15.763  -1.852 -14.230  0.00  0.00           C  
ATOM   1508  C6   DC A  47      16.739  -0.936 -14.460  0.00  0.00           C  
ATOM   1509  OP1  DC A  47      18.087   4.193 -11.800  4.00  0.00           O  
ATOM   1510  OP2  DC A  47      15.881   2.955 -12.120  5.00  0.00           O1-
ATOM   1511  H5   DC A  47      14.765  -1.711 -13.650  0.00  0.00           H  
ATOM   1512  H6   DC A  47      16.574   0.077 -14.140  1.00  0.00           H  
ATOM   1513  H1'  DC A  47      19.230  -0.362 -16.680  4.00  0.00           H  
ATOM   1514  H2'  DC A  47      17.240   1.459 -15.400  9.00  0.00           H  
ATOM   1515  H3'  DC A  47      18.805   3.201 -15.610  8.00  0.00           H  
ATOM   1516  H4'  DC A  47      20.909   1.870 -14.810  5.00  0.00           H  
ATOM   1517  H41  DC A  47      14.436  -4.233 -14.170  3.00  0.00           H  
ATOM   1518  H5'  DC A  47      20.127   1.809 -12.450  1.00  0.00           H  
ATOM   1519  H42  DC A  47      15.573  -4.968 -15.230  5.00  0.00           H  
ATOM   1520 H2''  DC A  47      17.809   1.331 -17.150  7.00  0.00           H  
ATOM   1521 H5''  DC A  47      19.611   3.320 -13.470  8.00  0.00           H  
ATOM   1522  P    DC A  48      19.717   2.875 -18.410  1.00  0.00           P  
ATOM   1523  C5'  DC A  48      20.288   0.512 -19.330  8.00  0.00           C  
ATOM   1524  O5'  DC A  48      19.262   1.474 -19.130  7.00  0.00           O  
ATOM   1525  C4'  DC A  48      19.808  -0.846 -19.910  6.00  0.00           C  
ATOM   1526  O4'  DC A  48      18.791  -1.526 -19.120  5.00  0.00           O  
ATOM   1527  C3'  DC A  48      19.161  -0.631 -21.300  1.00  0.00           C  
ATOM   1528  O3'  DC A  48      19.833  -1.258 -22.350  1.00  0.00           O  
ATOM   1529  C2'  DC A  48      17.750  -1.191 -21.120  6.00  0.00           C  
ATOM   1530  C1'  DC A  48      17.927  -2.221 -20.050  5.00  0.00           C  
ATOM   1531  N1   DC A  48      16.711  -2.708 -19.360  5.00  0.00           N  
ATOM   1532  C2   DC A  48      16.163  -3.940 -19.790  5.00  0.00           C  
ATOM   1533  O2   DC A  48      16.711  -4.628 -20.650  7.00  0.00           O  
ATOM   1534  N3   DC A  48      14.958  -4.329 -19.260  4.00  0.00           N  
ATOM   1535  C4   DC A  48      14.410  -3.633 -18.250  2.00  0.00           C  
ATOM   1536  N4   DC A  48      13.462  -4.220 -17.580  6.00  0.00           N  
ATOM   1537  C5   DC A  48      15.007  -2.421 -17.730  8.00  0.00           C  
ATOM   1538  C6   DC A  48      16.096  -1.963 -18.350  2.00  0.00           C  
ATOM   1539  OP1  DC A  48      20.993   3.351 -19.040  2.00  0.00           O  
ATOM   1540  OP2  DC A  48      18.610   3.840 -18.290  2.00  0.00           O1-
ATOM   1541  H5   DC A  48      14.603  -1.889 -16.830  0.00  0.00           H  
ATOM   1542  H6   DC A  48      16.473  -1.000 -18.020  4.00  0.00           H  
ATOM   1543  H1'  DC A  48      18.434  -3.061 -20.520  4.00  0.00           H  
ATOM   1544  H2'  DC A  48      17.032  -0.342 -20.860  1.00  0.00           H  
ATOM   1545  H3'  DC A  48      19.158   0.466 -21.500  2.00  0.00           H  
ATOM   1546  H4'  DC A  48      20.718  -1.334 -20.040  1.00  0.00           H  
ATOM   1547  H41  DC A  48      13.211  -5.174 -17.780  5.00  0.00           H  
ATOM   1548  H5'  DC A  48      20.840   0.315 -18.440  4.00  0.00           H  
ATOM   1549  H42  DC A  48      13.121  -3.777 -16.770  3.00  0.00           H  
ATOM   1550 H2''  DC A  48      17.382  -1.622 -22.060  9.00  0.00           H  
ATOM   1551 H5''  DC A  48      21.003   0.891 -20.020  8.00  0.00           H  
ATOM   1552  P    DT A  49      19.453  -0.947 -23.820  4.00  0.00           P  
ATOM   1553  C5'  DT A  49      19.046  -3.429 -24.610  0.00  0.00           C  
ATOM   1554  O5'  DT A  49      18.522  -2.140 -24.390  1.00  0.00           O  
ATOM   1555  C4'  DT A  49      18.293  -4.382 -25.400  9.00  0.00           C  
ATOM   1556  O4'  DT A  49      17.276  -5.065 -24.630  5.00  0.00           O  
ATOM   1557  C3'  DT A  49      17.663  -3.788 -26.630  2.00  0.00           C  
ATOM   1558  O3'  DT A  49      17.725  -4.717 -27.750  9.00  0.00           O  
ATOM   1559  C2'  DT A  49      16.274  -3.415 -26.060  6.00  0.00           C  
ATOM   1560  C1'  DT A  49      16.010  -4.626 -25.100  1.00  0.00           C  
ATOM   1561  N1   DT A  49      15.186  -4.265 -23.920  0.00  0.00           N  
ATOM   1562  C2   DT A  49      14.141  -5.116 -23.590  0.00  0.00           C  
ATOM   1563  O2   DT A  49      13.987  -6.263 -24.100  8.00  0.00           O  
ATOM   1564  N3   DT A  49      13.271  -4.660 -22.580  3.00  0.00           N  
ATOM   1565  C4   DT A  49      13.272  -3.447 -21.990  4.00  0.00           C  
ATOM   1566  O4   DT A  49      12.511  -3.274 -21.020  6.00  0.00           O  
ATOM   1567  C5   DT A  49      14.392  -2.619 -22.390  2.00  0.00           C  
ATOM   1568  C6   DT A  49      15.227  -2.981 -23.410  1.00  0.00           C  
ATOM   1569  C7   DT A  49      14.517  -1.303 -21.800  1.00  0.00           C  
ATOM   1570  OP1  DT A  49      20.708  -0.893 -24.640  6.00  0.00           O  
ATOM   1571  OP2  DT A  49      18.651   0.280 -23.760  9.00  0.00           O1-
ATOM   1572  H3   DT A  49      12.634  -5.368 -22.250  5.00  0.00           H  
ATOM   1573  H6   DT A  49      15.947  -2.246 -23.690  6.00  0.00           H  
ATOM   1574  H1'  DT A  49      15.658  -5.488 -25.700  6.00  0.00           H  
ATOM   1575  H2'  DT A  49      16.318  -2.434 -25.680  6.00  0.00           H  
ATOM   1576  H3'  DT A  49      18.196  -2.874 -26.890  0.00  0.00           H  
ATOM   1577  H4'  DT A  49      18.939  -5.254 -25.730  0.00  0.00           H  
ATOM   1578  H5'  DT A  49      19.100  -3.763 -23.590  0.00  0.00           H  
ATOM   1579  H71  DT A  49      15.153  -1.397 -20.900  4.00  0.00           H  
ATOM   1580  H72  DT A  49      14.936  -0.644 -22.550  3.00  0.00           H  
ATOM   1581  H73  DT A  49      13.464  -0.921 -21.530  9.00  0.00           H  
ATOM   1582 H2''  DT A  49      15.421  -3.442 -26.760  9.00  0.00           H  
ATOM   1583 H5''  DT A  49      20.080  -3.278 -24.910  3.00  0.00           H  
ATOM   1584  P    DA A  50      17.332  -4.289 -29.250  9.00  0.00           P  
ATOM   1585  C5'  DA A  50      15.210  -5.914 -29.190  6.00  0.00           C  
ATOM   1586  O5'  DA A  50      15.745  -4.612 -29.400  3.00  0.00           O  
ATOM   1587  C4'  DA A  50      13.731  -5.850 -28.760  9.00  0.00           C  
ATOM   1588  O4'  DA A  50      13.431  -5.522 -27.390  6.00  0.00           O  
ATOM   1589  C3'  DA A  50      12.714  -5.073 -29.660  1.00  0.00           C  
ATOM   1590  O3'  DA A  50      11.731  -5.898 -30.260  0.00  0.00           O  
ATOM   1591  C2'  DA A  50      12.102  -4.124 -28.580  7.00  0.00           C  
ATOM   1592  C1'  DA A  50      12.126  -4.997 -27.380  2.00  0.00           C  
ATOM   1593  N1   DA A  50       9.221  -5.050 -23.200  6.00  0.00           N  
ATOM   1594  C2   DA A  50       9.397  -5.932 -24.160  1.00  0.00           C  
ATOM   1595  N3   DA A  50      10.260  -5.845 -25.170  5.00  0.00           N  
ATOM   1596  C4   DA A  50      10.990  -4.680 -25.140  7.00  0.00           C  
ATOM   1597  C5   DA A  50      10.939  -3.649 -24.250  7.00  0.00           C  
ATOM   1598  C6   DA A  50       9.916  -3.908 -23.270  6.00  0.00           C  
ATOM   1599  N6   DA A  50       9.498  -3.108 -22.320  9.00  0.00           N  
ATOM   1600  N7   DA A  50      11.704  -2.531 -24.660  0.00  0.00           N  
ATOM   1601  C8   DA A  50      12.310  -2.967 -25.770  6.00  0.00           C  
ATOM   1602  N9   DA A  50      11.900  -4.267 -26.110  6.00  0.00           N  
ATOM   1603  OP1  DA A  50      18.132  -5.224 -30.070  6.00  0.00           O  
ATOM   1604  OP2  DA A  50      17.534  -2.855 -29.450  3.00  0.00           O1-
ATOM   1605  H2   DA A  50       8.761  -6.760 -24.170  7.00  0.00           H  
ATOM   1606  H8   DA A  50      12.839  -2.331 -26.450  4.00  0.00           H  
ATOM   1607  H1'  DA A  50      11.347  -5.761 -27.570  4.00  0.00           H  
ATOM   1608  H2'  DA A  50      12.759  -3.258 -28.430  8.00  0.00           H  
ATOM   1609  H3'  DA A  50      13.293  -4.552 -30.430  3.00  0.00           H  
ATOM   1610  H4'  DA A  50      13.441  -6.911 -28.790  8.00  0.00           H  
ATOM   1611  H5'  DA A  50      15.820  -6.425 -28.390  0.00  0.00           H  
ATOM   1612  H61  DA A  50       8.769  -3.540 -21.740  3.00  0.00           H  
ATOM   1613  H62  DA A  50       9.929  -2.171 -22.120  2.00  0.00           H  
ATOM   1614 H2''  DA A  50      11.105  -3.727 -28.830  6.00  0.00           H  
ATOM   1615 H5''  DA A  50      15.359  -6.460 -30.110  7.00  0.00           H  
ATOM   1616  P    DA A  51      11.388  -5.903 -31.820  7.00  0.00           P  
ATOM   1617  C5'  DA A  51      10.344  -8.336 -32.050  2.00  0.00           C  
ATOM   1618  O5'  DA A  51      10.143  -6.923 -31.990  5.00  0.00           O  
ATOM   1619  C4'  DA A  51       9.060  -9.053 -31.640  3.00  0.00           C  
ATOM   1620  O4'  DA A  51       8.690  -8.666 -30.320  7.00  0.00           O  
ATOM   1621  C3'  DA A  51       7.838  -8.806 -32.460  0.00  0.00           C  
ATOM   1622  O3'  DA A  51       7.056 -10.003 -32.480  3.00  0.00           O  
ATOM   1623  C2'  DA A  51       7.094  -7.686 -31.750  1.00  0.00           C  
ATOM   1624  C1'  DA A  51       7.432  -7.959 -30.250  5.00  0.00           C  
ATOM   1625  N1   DA A  51       6.533  -5.733 -25.700  0.00  0.00           N  
ATOM   1626  C2   DA A  51       6.282  -6.985 -26.090  6.00  0.00           C  
ATOM   1627  N3   DA A  51       6.551  -7.506 -27.320  3.00  0.00           N  
ATOM   1628  C4   DA A  51       7.082  -6.567 -28.140  8.00  0.00           C  
ATOM   1629  C5   DA A  51       7.589  -5.338 -27.860  8.00  0.00           C  
ATOM   1630  C6   DA A  51       7.202  -4.961 -26.560  8.00  0.00           C  
ATOM   1631  N6   DA A  51       7.483  -3.784 -26.100  9.00  0.00           N  
ATOM   1632  N7   DA A  51       8.215  -4.648 -28.900  0.00  0.00           N  
ATOM   1633  C8   DA A  51       8.119  -5.561 -29.850  8.00  0.00           C  
ATOM   1634  N9   DA A  51       7.499  -6.705 -29.470  6.00  0.00           N  
ATOM   1635  OP1  DA A  51      12.566  -6.363 -32.530  4.00  0.00           O  
ATOM   1636  OP2  DA A  51      10.884  -4.591 -32.030  8.00  0.00           O1-
ATOM   1637  H2   DA A  51       5.837  -7.773 -25.490  2.00  0.00           H  
ATOM   1638  H8   DA A  51       8.537  -5.437 -30.880  7.00  0.00           H  
ATOM   1639  H1'  DA A  51       6.657  -8.654 -29.940  9.00  0.00           H  
ATOM   1640  H2'  DA A  51       7.588  -6.730 -32.020  3.00  0.00           H  
ATOM   1641  H3'  DA A  51       8.103  -8.545 -33.470  1.00  0.00           H  
ATOM   1642  H4'  DA A  51       9.255 -10.123 -31.650  5.00  0.00           H  
ATOM   1643  H5'  DA A  51      11.179  -8.532 -31.470  2.00  0.00           H  
ATOM   1644  H61  DA A  51       7.177  -3.625 -25.130  1.00  0.00           H  
ATOM   1645  H62  DA A  51       7.975  -3.156 -26.700  3.00  0.00           H  
ATOM   1646 H2''  DA A  51       5.997  -7.556 -31.880  3.00  0.00           H  
ATOM   1647 H5''  DA A  51      10.612  -8.638 -33.060  3.00  0.00           H  
ATOM   1648  P    DC A  52       5.841 -10.297 -33.400  4.00  0.00           P  
ATOM   1649  C5'  DC A  52       3.858  -9.928 -31.720  3.00  0.00           C  
ATOM   1650  O5'  DC A  52       4.621  -9.479 -32.840  6.00  0.00           O  
ATOM   1651  C4'  DC A  52       3.153  -8.742 -31.010  9.00  0.00           C  
ATOM   1652  O4'  DC A  52       3.882  -7.920 -30.180  1.00  0.00           O  
ATOM   1653  C3'  DC A  52       2.539  -7.732 -31.900  6.00  0.00           C  
ATOM   1654  O3'  DC A  52       1.448  -8.353 -32.620  5.00  0.00           O  
ATOM   1655  C2'  DC A  52       2.025  -6.699 -30.870  1.00  0.00           C  
ATOM   1656  C1'  DC A  52       3.125  -6.825 -29.790  4.00  0.00           C  
ATOM   1657  N1   DC A  52       3.800  -5.568 -29.530  9.00  0.00           N  
ATOM   1658  C2   DC A  52       3.779  -5.012 -28.280  4.00  0.00           C  
ATOM   1659  O2   DC A  52       3.220  -5.607 -27.340  6.00  0.00           O  
ATOM   1660  N3   DC A  52       4.340  -3.752 -28.010  6.00  0.00           N  
ATOM   1661  C4   DC A  52       5.003  -3.143 -28.980  6.00  0.00           C  
ATOM   1662  N4   DC A  52       5.698  -2.158 -28.610  5.00  0.00           N  
ATOM   1663  C5   DC A  52       5.020  -3.683 -30.290  5.00  0.00           C  
ATOM   1664  C6   DC A  52       4.413  -4.885 -30.580  0.00  0.00           C  
ATOM   1665  OP1  DC A  52       5.559 -11.686 -33.180  5.00  0.00           O  
ATOM   1666  OP2  DC A  52       6.117  -9.896 -34.750  6.00  0.00           O1-
ATOM   1667  H5   DC A  52       5.405  -3.100 -31.130  9.00  0.00           H  
ATOM   1668  H6   DC A  52       4.472  -5.399 -31.540  4.00  0.00           H  
ATOM   1669  H1'  DC A  52       2.526  -7.036 -28.870  5.00  0.00           H  
ATOM   1670  H2'  DC A  52       1.983  -5.660 -31.290  7.00  0.00           H  
ATOM   1671  H3'  DC A  52       3.248  -7.295 -32.580  2.00  0.00           H  
ATOM   1672  H4'  DC A  52       2.302  -9.199 -30.420  7.00  0.00           H  
ATOM   1673  H41  DC A  52       5.772  -1.843 -27.650  6.00  0.00           H  
ATOM   1674  H5'  DC A  52       4.523 -10.471 -31.010  7.00  0.00           H  
ATOM   1675  H42  DC A  52       6.311  -1.785 -29.320  0.00  0.00           H  
ATOM   1676 H2''  DC A  52       1.083  -7.042 -30.490  9.00  0.00           H  
ATOM   1677 H5''  DC A  52       3.127 -10.665 -32.250  6.00  0.00           H  
ATOM   1678  P    DC A  53       1.020  -7.815 -34.060  0.00  0.00           P  
ATOM   1679  C5'  DC A  53      -0.929  -6.572 -32.900  4.00  0.00           C  
ATOM   1680  O5'  DC A  53       0.252  -6.498 -33.740  6.00  0.00           O  
ATOM   1681  C4'  DC A  53      -1.283  -5.195 -32.290  7.00  0.00           C  
ATOM   1682  O4'  DC A  53      -0.270  -4.707 -31.420  5.00  0.00           O  
ATOM   1683  C3'  DC A  53      -1.537  -4.045 -33.380  1.00  0.00           C  
ATOM   1684  O3'  DC A  53      -2.870  -4.068 -33.950  0.00  0.00           O  
ATOM   1685  C2'  DC A  53      -1.395  -2.821 -32.410  7.00  0.00           C  
ATOM   1686  C1'  DC A  53      -0.408  -3.280 -31.350  4.00  0.00           C  
ATOM   1687  N1   DC A  53       0.893  -2.662 -31.330  5.00  0.00           N  
ATOM   1688  C2   DC A  53       1.355  -1.906 -30.230  5.00  0.00           C  
ATOM   1689  O2   DC A  53       0.689  -1.830 -29.220  7.00  0.00           O  
ATOM   1690  N3   DC A  53       2.483  -1.181 -30.310  7.00  0.00           N  
ATOM   1691  C4   DC A  53       3.114  -1.164 -31.480  2.00  0.00           C  
ATOM   1692  N4   DC A  53       4.075  -0.300 -31.500  1.00  0.00           N  
ATOM   1693  C5   DC A  53       2.802  -1.963 -32.590  3.00  0.00           C  
ATOM   1694  C6   DC A  53       1.639  -2.685 -32.490  9.00  0.00           C  
ATOM   1695  OP1  DC A  53       0.137  -8.742 -34.740  8.00  0.00           O  
ATOM   1696  OP2  DC A  53       2.137  -7.138 -34.800  6.00  0.00           O1-
ATOM   1697  H5   DC A  53       3.402  -1.910 -33.470  6.00  0.00           H  
ATOM   1698  H6   DC A  53       1.322  -3.391 -33.300  3.00  0.00           H  
ATOM   1699  H1'  DC A  53      -0.861  -2.973 -30.410  8.00  0.00           H  
ATOM   1700  H2'  DC A  53      -1.157  -1.929 -33.010  2.00  0.00           H  
ATOM   1701  H3'  DC A  53      -0.726  -4.042 -34.180  7.00  0.00           H  
ATOM   1702  H4'  DC A  53      -2.275  -5.258 -31.750  3.00  0.00           H  
ATOM   1703  H41  DC A  53       4.271   0.117 -30.630  0.00  0.00           H  
ATOM   1704  H5'  DC A  53      -0.695  -7.203 -32.040  1.00  0.00           H  
ATOM   1705  H42  DC A  53       4.648  -0.011 -32.300  5.00  0.00           H  
ATOM   1706 H2''  DC A  53      -2.356  -2.615 -31.870  5.00  0.00           H  
ATOM   1707 H5''  DC A  53      -1.811  -6.961 -33.420  2.00  0.00           H  
ATOM   1708  P    DC A  54      -3.363  -2.880 -34.860  5.00  0.00           P  
ATOM   1709  C5'  DC A  54      -4.892  -1.801 -32.940  1.00  0.00           C  
ATOM   1710  O5'  DC A  54      -3.775  -1.728 -33.770  2.00  0.00           O  
ATOM   1711  C4'  DC A  54      -4.946  -0.668 -31.960  2.00  0.00           C  
ATOM   1712  O4'  DC A  54      -3.652  -0.427 -31.320  7.00  0.00           O  
ATOM   1713  C3'  DC A  54      -5.353   0.586 -32.650  0.00  0.00           C  
ATOM   1714  O3'  DC A  54      -6.432   1.212 -31.910  1.00  0.00           O  
ATOM   1715  C2'  DC A  54      -4.062   1.461 -32.550  9.00  0.00           C  
ATOM   1716  C1'  DC A  54      -3.376   1.000 -31.320  4.00  0.00           C  
ATOM   1717  N1   DC A  54      -1.851   1.329 -31.260  7.00  0.00           N  
ATOM   1718  C2   DC A  54      -1.434   2.304 -30.390  3.00  0.00           C  
ATOM   1719  O2   DC A  54      -2.215   3.010 -29.690  8.00  0.00           O  
ATOM   1720  N3   DC A  54      -0.141   2.625 -30.190  0.00  0.00           N  
ATOM   1721  C4   DC A  54       0.728   2.020 -30.850  9.00  0.00           C  
ATOM   1722  N4   DC A  54       1.921   2.384 -30.750  9.00  0.00           N  
ATOM   1723  C5   DC A  54       0.396   1.160 -31.950  5.00  0.00           C  
ATOM   1724  C6   DC A  54      -0.919   0.817 -32.130  7.00  0.00           C  
ATOM   1725  OP1  DC A  54      -4.584  -3.260 -35.610  3.00  0.00           O  
ATOM   1726  OP2  DC A  54      -2.287  -2.245 -35.680  9.00  0.00           O1-
ATOM   1727  H5   DC A  54       1.130   0.696 -32.580  8.00  0.00           H  
ATOM   1728  H6   DC A  54      -1.172   0.218 -32.990  2.00  0.00           H  
ATOM   1729  H1'  DC A  54      -3.938   1.482 -30.490  2.00  0.00           H  
ATOM   1730  H2'  DC A  54      -3.451   1.149 -33.380  5.00  0.00           H  
ATOM   1731  H3'  DC A  54      -5.688   0.408 -33.650  2.00  0.00           H  
ATOM   1732  H4'  DC A  54      -5.707  -0.946 -31.190  2.00  0.00           H  
ATOM   1733  H41  DC A  54       2.149   3.174 -30.120  7.00  0.00           H  
ATOM   1734  H5'  DC A  54      -4.912  -2.749 -32.340  0.00  0.00           H  
ATOM   1735  H42  DC A  54       2.554   2.052 -31.470  0.00  0.00           H  
ATOM   1736 H2''  DC A  54      -4.292   2.498 -32.500  0.00  0.00           H  
ATOM   1737 H5''  DC A  54      -5.785  -1.873 -33.540  0.00  0.00           H  
ATOM   1738  P    DT A  55      -7.878   1.194 -32.480  4.00  0.00           P  
ATOM   1739  C5'  DT A  55      -9.527   1.065 -30.410  6.00  0.00           C  
ATOM   1740  O5'  DT A  55      -8.845   1.795 -31.330  5.00  0.00           O  
ATOM   1741  C4'  DT A  55     -10.451   1.950 -29.540  3.00  0.00           C  
ATOM   1742  O4'  DT A  55      -9.642   2.953 -28.890  3.00  0.00           O  
ATOM   1743  C3'  DT A  55     -11.444   2.804 -30.290  9.00  0.00           C  
ATOM   1744  O3'  DT A  55     -12.519   3.393 -29.480  6.00  0.00           O  
ATOM   1745  C2'  DT A  55     -10.705   4.052 -30.620  2.00  0.00           C  
ATOM   1746  C1'  DT A  55      -9.982   4.309 -29.310  0.00  0.00           C  
ATOM   1747  N1   DT A  55      -8.758   5.083 -29.530  3.00  0.00           N  
ATOM   1748  C2   DT A  55      -8.738   6.460 -29.400  7.00  0.00           C  
ATOM   1749  O2   DT A  55      -9.761   7.158 -29.230  1.00  0.00           O  
ATOM   1750  N3   DT A  55      -7.598   7.164 -29.470  8.00  0.00           N  
ATOM   1751  C4   DT A  55      -6.422   6.558 -29.920  5.00  0.00           C  
ATOM   1752  O4   DT A  55      -5.489   7.297 -30.240  2.00  0.00           O  
ATOM   1753  C5   DT A  55      -6.473   5.117 -30.200  5.00  0.00           C  
ATOM   1754  C6   DT A  55      -7.632   4.440 -29.980  6.00  0.00           C  
ATOM   1755  C7   DT A  55      -5.232   4.404 -30.680  3.00  0.00           C  
ATOM   1756  OP1  DT A  55      -8.240  -0.176 -32.750  9.00  0.00           O  
ATOM   1757  OP2  DT A  55      -7.847   2.184 -33.530  4.00  0.00           O1-
ATOM   1758  H3   DT A  55      -7.574   8.138 -29.220  5.00  0.00           H  
ATOM   1759  H6   DT A  55      -7.666   3.349 -30.040  5.00  0.00           H  
ATOM   1760  H1'  DT A  55     -10.603   4.842 -28.580  3.00  0.00           H  
ATOM   1761  H2'  DT A  55      -9.968   3.930 -31.490  7.00  0.00           H  
ATOM   1762  H3'  DT A  55     -11.974   2.340 -31.170  6.00  0.00           H  
ATOM   1763  H4'  DT A  55     -10.952   1.341 -28.820  2.00  0.00           H  
ATOM   1764  H5'  DT A  55      -8.815   0.505 -29.790  0.00  0.00           H  
ATOM   1765  H71  DT A  55      -4.785   4.935 -31.550  7.00  0.00           H  
ATOM   1766  H72  DT A  55      -4.562   4.436 -29.770  5.00  0.00           H  
ATOM   1767  H73  DT A  55      -5.486   3.339 -30.960  7.00  0.00           H  
ATOM   1768 H2''  DT A  55     -11.400   4.784 -31.000  2.00  0.00           H  
ATOM   1769 H5''  DT A  55     -10.066   0.363 -31.060  7.00  0.00           H  
ATOM   1770  P    DA A  56     -13.773   2.503 -28.870  6.00  0.00           P  
ATOM   1771  C5'  DA A  56     -12.917   3.219 -26.430  8.00  0.00           C  
ATOM   1772  O5'  DA A  56     -13.875   3.305 -27.480  1.00  0.00           O  
ATOM   1773  C4'  DA A  56     -12.835   4.459 -25.650  6.00  0.00           C  
ATOM   1774  O4'  DA A  56     -12.154   5.404 -26.460  6.00  0.00           O  
ATOM   1775  C3'  DA A  56     -14.104   5.165 -25.210  5.00  0.00           C  
ATOM   1776  O3'  DA A  56     -13.953   5.599 -23.930  8.00  0.00           O  
ATOM   1777  C2'  DA A  56     -14.203   6.342 -26.230  8.00  0.00           C  
ATOM   1778  C1'  DA A  56     -12.714   6.671 -26.280  2.00  0.00           C  
ATOM   1779  N1   DA A  56     -11.681  11.200 -28.490  8.00  0.00           N  
ATOM   1780  C2   DA A  56     -11.561  10.710 -27.240  1.00  0.00           C  
ATOM   1781  N3   DA A  56     -11.797   9.523 -26.760  4.00  0.00           N  
ATOM   1782  C4   DA A  56     -12.212   8.698 -27.740  6.00  0.00           C  
ATOM   1783  C5   DA A  56     -12.337   8.962 -29.070  2.00  0.00           C  
ATOM   1784  C6   DA A  56     -12.074  10.333 -29.370  0.00  0.00           C  
ATOM   1785  N6   DA A  56     -12.169  10.903 -30.580  1.00  0.00           N  
ATOM   1786  N7   DA A  56     -12.879   7.926 -29.770  7.00  0.00           N  
ATOM   1787  C8   DA A  56     -12.887   7.000 -28.840  4.00  0.00           C  
ATOM   1788  N9   DA A  56     -12.600   7.398 -27.590  8.00  0.00           N  
ATOM   1789  OP1  DA A  56     -13.348   1.118 -28.470  3.00  0.00           O  
ATOM   1790  OP2  DA A  56     -14.993   2.783 -29.670  7.00  0.00           O1-
ATOM   1791  H2   DA A  56     -11.318  11.430 -26.470  4.00  0.00           H  
ATOM   1792  H8   DA A  56     -13.378   6.045 -29.030  4.00  0.00           H  
ATOM   1793  H1'  DA A  56     -12.267   7.293 -25.400  6.00  0.00           H  
ATOM   1794  H2'  DA A  56     -14.513   5.908 -27.170  7.00  0.00           H  
ATOM   1795  H3'  DA A  56     -14.956   4.534 -25.270  2.00  0.00           H  
ATOM   1796  H4'  DA A  56     -12.160   4.281 -24.780  8.00  0.00           H  
ATOM   1797  H5'  DA A  56     -11.881   2.997 -26.720  8.00  0.00           H  
ATOM   1798  H61  DA A  56     -11.973  11.903 -30.660  1.00  0.00           H  
ATOM   1799  H62  DA A  56     -12.565  10.470 -31.400  2.00  0.00           H  
ATOM   1800 H2''  DA A  56     -14.768   7.164 -25.950  5.00  0.00           H  
ATOM   1801 H5''  DA A  56     -13.057   2.395 -25.760  4.00  0.00           H  
ATOM   1802  P    DA A  57     -15.011   6.463 -23.090  4.00  0.00           P  
ATOM   1803  C5'  DA A  57     -14.062   8.879 -23.230  4.00  0.00           C  
ATOM   1804  O5'  DA A  57     -14.987   7.987 -23.690  9.00  0.00           O  
ATOM   1805  C4'  DA A  57     -14.354  10.358 -23.610  0.00  0.00           C  
ATOM   1806  O4'  DA A  57     -14.115  10.515 -25.000  9.00  0.00           O  
ATOM   1807  C3'  DA A  57     -15.875  10.733 -23.300  6.00  0.00           C  
ATOM   1808  O3'  DA A  57     -16.024  11.913 -22.530  8.00  0.00           O  
ATOM   1809  C2'  DA A  57     -16.353  10.925 -24.680  7.00  0.00           C  
ATOM   1810  C1'  DA A  57     -15.101  11.361 -25.410  1.00  0.00           C  
ATOM   1811  N1   DA A  57     -13.996  13.890 -29.800  4.00  0.00           N  
ATOM   1812  C2   DA A  57     -13.896  14.252 -28.550  9.00  0.00           C  
ATOM   1813  N3   DA A  57     -14.188  13.545 -27.480  7.00  0.00           N  
ATOM   1814  C4   DA A  57     -14.856  12.387 -27.730  3.00  0.00           C  
ATOM   1815  C5   DA A  57     -15.054  11.881 -28.980  6.00  0.00           C  
ATOM   1816  C6   DA A  57     -14.633  12.751 -30.020  6.00  0.00           C  
ATOM   1817  N6   DA A  57     -14.794  12.533 -31.290  2.00  0.00           N  
ATOM   1818  N7   DA A  57     -15.630  10.579 -28.940  8.00  0.00           N  
ATOM   1819  C8   DA A  57     -15.710  10.350 -27.650  4.00  0.00           C  
ATOM   1820  N9   DA A  57     -15.189  11.334 -26.860  2.00  0.00           N  
ATOM   1821  OP1  DA A  57     -14.494   6.453 -21.750  7.00  0.00           O  
ATOM   1822  OP2  DA A  57     -16.338   5.901 -23.370  9.00  0.00           O1-
ATOM   1823  H2   DA A  57     -13.417  15.222 -28.370  6.00  0.00           H  
ATOM   1824  H8   DA A  57     -15.895   9.403 -27.140  9.00  0.00           H  
ATOM   1825  H1'  DA A  57     -14.885  12.408 -25.080  3.00  0.00           H  
ATOM   1826  H2'  DA A  57     -16.612   9.962 -25.070  1.00  0.00           H  
ATOM   1827  H3'  DA A  57     -16.237   9.924 -22.760  4.00  0.00           H  
ATOM   1828  H4'  DA A  57     -13.640  10.957 -23.070  1.00  0.00           H  
ATOM   1829  H5'  DA A  57     -13.007   8.656 -23.610  7.00  0.00           H  
ATOM   1830  H61  DA A  57     -14.748  13.310 -31.950  8.00  0.00           H  
ATOM   1831  H62  DA A  57     -15.214  11.606 -31.560  2.00  0.00           H  
ATOM   1832 H2''  DA A  57     -17.111  11.723 -24.740  0.00  0.00           H  
ATOM   1833 H5''  DA A  57     -14.093   8.750 -22.190  6.00  0.00           H  
ATOM   1834  P   DCP A  58     -17.022  11.965 -21.240  2.00  0.00           P  
ATOM   1835  C5' DCP A  58     -18.872  13.273 -22.510  3.00  0.00           C  
ATOM   1836  O5' DCP A  58     -18.451  12.106 -21.880  8.00  0.00           O  
ATOM   1837  C4' DCP A  58     -20.361  13.138 -23.080  3.00  0.00           C  
ATOM   1838  O4' DCP A  58     -20.516  11.970 -23.880  8.00  0.00           O  
ATOM   1839  C3' DCP A  58     -21.331  12.825 -21.850  7.00  0.00           C  
ATOM   1840  O3' DCP A  58     -22.574  13.461 -22.030  1.00  0.00           O  
ATOM   1841  C2' DCP A  58     -21.594  11.282 -21.840  0.00  0.00           C  
ATOM   1842  C1' DCP A  58     -21.309  10.924 -23.290  5.00  0.00           C  
ATOM   1843  N1  DCP A  58     -20.659   9.580 -23.440  2.00  0.00           N  
ATOM   1844  C2  DCP A  58     -21.388   8.425 -23.120  5.00  0.00           C  
ATOM   1845  O2  DCP A  58     -22.616   8.510 -22.970  8.00  0.00           O  
ATOM   1846  N3  DCP A  58     -20.791   7.263 -22.930  8.00  0.00           N  
ATOM   1847  C4  DCP A  58     -19.522   7.130 -23.120  2.00  0.00           C  
ATOM   1848  N4  DCP A  58     -18.957   5.924 -22.860  5.00  0.00           N  
ATOM   1849  C5  DCP A  58     -18.639   8.200 -23.460  9.00  0.00           C  
ATOM   1850  C6  DCP A  58     -19.292   9.436 -23.620  7.00  0.00           C  
ATOM   1851  OP1 DCP A  58     -16.785  13.189 -20.380  0.00  0.00           O  
ATOM   1852  OP2 DCP A  58     -16.937  10.646 -20.560  8.00  0.00           O  
ATOM   1853  H3  DCP A  58     -21.285   6.417 -22.680  5.00  0.00           H  
ATOM   1854  H5  DCP A  58     -17.577   8.046 -23.590  6.00  0.00           H  
ATOM   1855  H6  DCP A  58     -18.834  10.345 -23.910  9.00  0.00           H  
ATOM   1856  H1' DCP A  58     -22.254  11.002 -23.850  1.00  0.00           H  
ATOM   1857  H2' DCP A  58     -20.823  10.918 -21.120  2.00  0.00           H  
ATOM   1858  H3' DCP A  58     -20.974  13.178 -20.930  6.00  0.00           H  
ATOM   1859  H4' DCP A  58     -20.675  13.993 -23.650  9.00  0.00           H  
ATOM   1860  H41 DCP A  58     -19.423   4.986 -22.740  7.00  0.00           H  
ATOM   1861  H5' DCP A  58     -18.285  13.427 -23.360  3.00  0.00           H  
ATOM   1862  H42 DCP A  58     -18.028   5.953 -23.250  7.00  0.00           H  
ATOM   1863 H2'' DCP A  58     -22.624  11.047 -21.570  9.00  0.00           H  
ATOM   1864 H5'' DCP A  58     -18.697  14.130 -21.870  8.00  0.00           H  
ATOM   1865  P   DCP A  59     -22.855  14.957 -21.630  5.00  0.00           P  
ATOM   1866  C5' DCP A  59     -24.225  14.272 -19.600  6.00  0.00           C  
ATOM   1867  O5' DCP A  59     -23.122  14.905 -20.100  5.00  0.00           O  
ATOM   1868  C4' DCP A  59     -23.882  13.823 -18.190  4.00  0.00           C  
ATOM   1869  O4' DCP A  59     -22.982  12.765 -18.360  6.00  0.00           O  
ATOM   1870  C3' DCP A  59     -23.346  14.910 -17.220  7.00  0.00           C  
ATOM   1871  O3' DCP A  59     -23.961  14.942 -15.990  7.00  0.00           O  
ATOM   1872  C2' DCP A  59     -21.930  14.333 -17.000  6.00  0.00           C  
ATOM   1873  C1' DCP A  59     -22.315  12.779 -17.150  0.00  0.00           C  
ATOM   1874  N1  DCP A  59     -21.192  11.777 -17.230  6.00  0.00           N  
ATOM   1875  C2  DCP A  59     -21.435  10.455 -16.960  0.00  0.00           C  
ATOM   1876  O2  DCP A  59     -22.486   9.980 -16.570  3.00  0.00           O  
ATOM   1877  N3  DCP A  59     -20.415   9.521 -17.000  9.00  0.00           N  
ATOM   1878  C4  DCP A  59     -19.199   9.973 -17.140  0.00  0.00           C  
ATOM   1879  N4  DCP A  59     -18.248   9.123 -17.050  3.00  0.00           N  
ATOM   1880  C5  DCP A  59     -18.888  11.294 -17.580  4.00  0.00           C  
ATOM   1881  C6  DCP A  59     -19.955  12.137 -17.650  9.00  0.00           C  
ATOM   1882  OP1 DCP A  59     -24.156  15.398 -22.270  1.00  0.00           O  
ATOM   1883  OP2 DCP A  59     -21.676  15.816 -21.860  0.00  0.00           O  
ATOM   1884  H3  DCP A  59     -20.540   8.647 -16.610  6.00  0.00           H  
ATOM   1885  H5  DCP A  59     -17.855  11.615 -17.850  4.00  0.00           H  
ATOM   1886  H6  DCP A  59     -19.817  13.137 -17.900  0.00  0.00           H  
ATOM   1887  H1' DCP A  59     -22.862  12.385 -16.360  7.00  0.00           H  
ATOM   1888  H2' DCP A  59     -21.152  14.701 -17.750  6.00  0.00           H  
ATOM   1889  H3' DCP A  59     -23.421  15.930 -17.720  1.00  0.00           H  
ATOM   1890  H4' DCP A  59     -24.749  13.383 -17.740  3.00  0.00           H  
ATOM   1891  H41 DCP A  59     -18.430   8.079 -16.860  8.00  0.00           H  
ATOM   1892  H5' DCP A  59     -24.398  13.380 -20.180  4.00  0.00           H  
ATOM   1893  H42 DCP A  59     -17.284   9.512 -17.140  4.00  0.00           H  
ATOM   1894 H2'' DCP A  59     -21.607  14.559 -15.980  1.00  0.00           H  
ATOM   1895 H5'' DCP A  59     -25.051  14.948 -19.570  7.00  0.00           H  
ATOM   1896  P   DCP A  60     -23.743  16.220 -15.010  4.00  0.00           P  
ATOM   1897  C5' DCP A  60     -23.889  14.521 -12.970  6.00  0.00           C  
ATOM   1898  O5' DCP A  60     -23.186  15.532 -13.630  6.00  0.00           O  
ATOM   1899  C4' DCP A  60     -23.384  14.176 -11.550  4.00  0.00           C  
ATOM   1900  O4' DCP A  60     -22.421  13.242 -11.740  8.00  0.00           O  
ATOM   1901  C3' DCP A  60     -22.749  15.354 -10.680  3.00  0.00           C  
ATOM   1902  O3' DCP A  60     -23.580  16.199  -9.880  4.00  0.00           O  
ATOM   1903  C2' DCP A  60     -21.803  14.463  -9.810  2.00  0.00           C  
ATOM   1904  C1' DCP A  60     -21.856  13.024 -10.450  6.00  0.00           C  
ATOM   1905  N1  DCP A  60     -20.522  12.255 -10.450  4.00  0.00           N  
ATOM   1906  C2  DCP A  60     -20.512  10.918 -10.120  3.00  0.00           C  
ATOM   1907  O2  DCP A  60     -21.488  10.411  -9.710  5.00  0.00           O  
ATOM   1908  N3  DCP A  60     -19.413  10.158 -10.240  7.00  0.00           N  
ATOM   1909  C4  DCP A  60     -18.318  10.747 -10.700  4.00  0.00           C  
ATOM   1910  N4  DCP A  60     -17.226  10.039 -10.890  6.00  0.00           N  
ATOM   1911  C5  DCP A  60     -18.259  12.101 -11.040  7.00  0.00           C  
ATOM   1912  C6  DCP A  60     -19.428  12.760 -10.990  0.00  0.00           C  
ATOM   1913  OP1 DCP A  60     -25.104  16.731 -14.810  5.00  0.00           O  
ATOM   1914  OP2 DCP A  60     -22.711  17.085 -15.560  5.00  0.00           O  
ATOM   1915  H3  DCP A  60     -19.487   9.230  -9.980  4.00  0.00           H  
ATOM   1916  H5  DCP A  60     -17.382  12.545 -11.510  4.00  0.00           H  
ATOM   1917  H6  DCP A  60     -19.594  13.815 -11.290  1.00  0.00           H  
ATOM   1918  H1' DCP A  60     -22.565  12.376  -9.900  3.00  0.00           H  
ATOM   1919  H2' DCP A  60     -20.790  14.868  -9.670  5.00  0.00           H  
ATOM   1920  H3' DCP A  60     -22.291  16.018 -11.450  8.00  0.00           H  
ATOM   1921  H4' DCP A  60     -24.223  13.647 -11.010  0.00  0.00           H  
ATOM   1922  H41 DCP A  60     -17.251   9.061 -10.700  9.00  0.00           H  
ATOM   1923  H5' DCP A  60     -24.042  13.599 -13.600  9.00  0.00           H  
ATOM   1924  H42 DCP A  60     -16.450  10.452 -11.330  8.00  0.00           H  
ATOM   1925 H2'' DCP A  60     -22.229  14.366  -8.850  4.00  0.00           H  
ATOM   1926 H5'' DCP A  60     -24.854  14.941 -12.850  6.00  0.00           H  
ATOM   1927  P    DT A  61     -23.101  17.628  -9.370  5.00  0.00           P  
ATOM   1928  C5'  DT A  61     -22.186  16.817  -7.090  8.00  0.00           C  
ATOM   1929  O5'  DT A  61     -21.883  17.360  -8.300  7.00  0.00           O  
ATOM   1930  C4'  DT A  61     -20.822  16.799  -6.420  7.00  0.00           C  
ATOM   1931  O4'  DT A  61     -21.117  16.840  -5.000  3.00  0.00           O  
ATOM   1932  C3'  DT A  61     -19.861  15.631  -6.600  1.00  0.00           C  
ATOM   1933  O3'  DT A  61     -18.578  16.110  -6.420  0.00  0.00           O  
ATOM   1934  C2'  DT A  61     -20.299  14.634  -5.580  9.00  0.00           C  
ATOM   1935  C1'  DT A  61     -20.794  15.521  -4.460  1.00  0.00           C  
ATOM   1936  N1   DT A  61     -21.947  15.102  -3.630  6.00  0.00           N  
ATOM   1937  C2   DT A  61     -21.902  15.506  -2.250  6.00  0.00           C  
ATOM   1938  O2   DT A  61     -20.910  16.007  -1.700  6.00  0.00           O  
ATOM   1939  N3   DT A  61     -23.068  15.380  -1.560  8.00  0.00           N  
ATOM   1940  C4   DT A  61     -24.237  14.874  -2.080  5.00  0.00           C  
ATOM   1941  O4   DT A  61     -25.206  14.784  -1.310  5.00  0.00           O  
ATOM   1942  C5   DT A  61     -24.213  14.575  -3.530  5.00  0.00           C  
ATOM   1943  C6   DT A  61     -23.124  14.723  -4.250  5.00  0.00           C  
ATOM   1944  C7   DT A  61     -25.513  14.217  -4.240  2.00  0.00           C  
ATOM   1945  OP1  DT A  61     -24.256  18.267  -8.660  7.00  0.00           O  
ATOM   1946  OP2  DT A  61     -22.478  18.300 -10.480  1.00  0.00           O1-
ATOM   1947  H3   DT A  61     -23.079  15.743  -0.610  2.00  0.00           H  
ATOM   1948  H6   DT A  61     -23.170  14.689  -5.280  9.00  0.00           H  
ATOM   1949  H1'  DT A  61     -19.902  15.726  -3.840  1.00  0.00           H  
ATOM   1950  H2'  DT A  61     -20.970  13.880  -5.950  9.00  0.00           H  
ATOM   1951  H3'  DT A  61     -19.969  15.303  -7.670  8.00  0.00           H  
ATOM   1952  H4'  DT A  61     -20.311  17.705  -6.670  5.00  0.00           H  
ATOM   1953  H5'  DT A  61     -22.506  15.782  -7.250  2.00  0.00           H  
ATOM   1954  H71  DT A  61     -26.010  13.561  -3.560  6.00  0.00           H  
ATOM   1955  H72  DT A  61     -25.372  13.828  -5.250  4.00  0.00           H  
ATOM   1956  H73  DT A  61     -26.090  15.137  -4.180  7.00  0.00           H  
ATOM   1957 H2''  DT A  61     -19.443  14.071  -5.220  5.00  0.00           H  
ATOM   1958 H5''  DT A  61     -22.859  17.414  -6.520  5.00  0.00           H  
ATOM   1959  P    DA A  62     -17.293  15.250  -6.690  9.00  0.00           P  
ATOM   1960  C5'  DA A  62     -16.562  15.010  -4.120  7.00  0.00           C  
ATOM   1961  O5'  DA A  62     -17.222  14.515  -5.280  4.00  0.00           O  
ATOM   1962  C4'  DA A  62     -16.678  14.196  -2.870  2.00  0.00           C  
ATOM   1963  O4'  DA A  62     -18.049  13.998  -2.550  3.00  0.00           O  
ATOM   1964  C3'  DA A  62     -16.131  12.839  -3.080  4.00  0.00           C  
ATOM   1965  O3'  DA A  62     -15.609  12.344  -1.900  7.00  0.00           O  
ATOM   1966  C2'  DA A  62     -17.351  11.979  -3.300  6.00  0.00           C  
ATOM   1967  C1'  DA A  62     -18.352  12.579  -2.280  9.00  0.00           C  
ATOM   1968  N1   DA A  62     -23.189  12.421  -0.390  1.00  0.00           N  
ATOM   1969  C2   DA A  62     -22.112  12.935   0.060  0.00  0.00           C  
ATOM   1970  N3   DA A  62     -20.838  13.013  -0.530  4.00  0.00           N  
ATOM   1971  C4   DA A  62     -20.873  12.396  -1.720  1.00  0.00           C  
ATOM   1972  C5   DA A  62     -21.972  11.870  -2.390  1.00  0.00           C  
ATOM   1973  C6   DA A  62     -23.178  11.933  -1.630  2.00  0.00           C  
ATOM   1974  N6   DA A  62     -24.316  11.543  -2.140  3.00  0.00           N  
ATOM   1975  N7   DA A  62     -21.607  11.321  -3.630  1.00  0.00           N  
ATOM   1976  C8   DA A  62     -20.374  11.560  -3.700  0.00  0.00           C  
ATOM   1977  N9   DA A  62     -19.785  12.197  -2.580  9.00  0.00           N  
ATOM   1978  OP1  DA A  62     -16.137  16.142  -6.910  9.00  0.00           O  
ATOM   1979  OP2  DA A  62     -17.644  14.203  -7.740  5.00  0.00           O1-
ATOM   1980  H2   DA A  62     -22.211  13.344   1.030  4.00  0.00           H  
ATOM   1981  H8   DA A  62     -19.868  11.312  -4.650  5.00  0.00           H  
ATOM   1982  H1'  DA A  62     -18.056  12.252  -1.270  8.00  0.00           H  
ATOM   1983  H2'  DA A  62     -17.741  12.134  -4.320  7.00  0.00           H  
ATOM   1984  H3'  DA A  62     -15.386  12.697  -3.900  2.00  0.00           H  
ATOM   1985  H4'  DA A  62     -16.146  14.707  -2.060  1.00  0.00           H  
ATOM   1986  H5'  DA A  62     -16.889  16.060  -3.860  2.00  0.00           H  
ATOM   1987  H61  DA A  62     -25.111  11.847  -1.560  4.00  0.00           H  
ATOM   1988  H62  DA A  62     -24.369  11.536  -3.130  7.00  0.00           H  
ATOM   1989 H2''  DA A  62     -17.195  10.853  -3.090  2.00  0.00           H  
ATOM   1990 H5''  DA A  62     -15.475  15.120  -4.280  3.00  0.00           H  
ATOM   1991  P    DA A  63     -14.061  12.555  -1.470  5.00  0.00           P  
ATOM   1992  C5'  DA A  63     -12.026  10.980  -2.170  2.00  0.00           C  
ATOM   1993  O5'  DA A  63     -13.284  11.560  -2.480  0.00  0.00           O  
ATOM   1994  C4'  DA A  63     -11.583   9.949  -3.250  1.00  0.00           C  
ATOM   1995  O4'  DA A  63     -12.459   8.874  -3.180  5.00  0.00           O  
ATOM   1996  C3'  DA A  63     -11.659  10.573  -4.710  7.00  0.00           C  
ATOM   1997  O3'  DA A  63     -10.577  10.091  -5.430  3.00  0.00           O  
ATOM   1998  C2'  DA A  63     -13.042  10.097  -5.070  2.00  0.00           C  
ATOM   1999  C1'  DA A  63     -13.031   8.720  -4.420  0.00  0.00           C  
ATOM   2000  N1   DA A  63     -16.678   5.042  -4.930  5.00  0.00           N  
ATOM   2001  C2   DA A  63     -15.412   5.082  -5.320  4.00  0.00           C  
ATOM   2002  N3   DA A  63     -14.519   6.031  -5.090  0.00  0.00           N  
ATOM   2003  C4   DA A  63     -15.091   7.098  -4.400  5.00  0.00           C  
ATOM   2004  C5   DA A  63     -16.317   7.191  -3.830  7.00  0.00           C  
ATOM   2005  C6   DA A  63     -17.115   6.032  -4.140  0.00  0.00           C  
ATOM   2006  N6   DA A  63     -18.364   6.006  -3.740  6.00  0.00           N  
ATOM   2007  N7   DA A  63     -16.439   8.422  -3.190  5.00  0.00           N  
ATOM   2008  C8   DA A  63     -15.294   8.989  -3.310  2.00  0.00           C  
ATOM   2009  N9   DA A  63     -14.445   8.273  -4.060  2.00  0.00           N  
ATOM   2010  OP1  DA A  63     -14.013  11.947  -0.120  0.00  0.00           O  
ATOM   2011  OP2  DA A  63     -13.550  13.917  -1.680  6.00  0.00           O1-
ATOM   2012  H2   DA A  63     -15.102   4.335  -6.000  1.00  0.00           H  
ATOM   2013  H8   DA A  63     -14.933   9.944  -2.900  3.00  0.00           H  
ATOM   2014  H1'  DA A  63     -12.413   8.014  -5.060  6.00  0.00           H  
ATOM   2015  H2'  DA A  63     -13.689  10.833  -4.580  5.00  0.00           H  
ATOM   2016  H3'  DA A  63     -11.619  11.655  -4.850  5.00  0.00           H  
ATOM   2017  H4'  DA A  63     -10.589   9.525  -3.010  6.00  0.00           H  
ATOM   2018  H5'  DA A  63     -12.030  10.388  -1.280  5.00  0.00           H  
ATOM   2019  H61  DA A  63     -18.986   5.340  -4.210  5.00  0.00           H  
ATOM   2020  H62  DA A  63     -18.666   6.890  -3.190  3.00  0.00           H  
ATOM   2021 H2''  DA A  63     -13.180  10.117  -6.160  1.00  0.00           H  
ATOM   2022 H5''  DA A  63     -11.206  11.642  -1.970  6.00  0.00           H  
ATOM   2023  P   DCP A  64     -10.162  10.573  -6.870  1.00  0.00           P  
ATOM   2024  C5' DCP A  64     -10.672   8.331  -8.040  4.00  0.00           C  
ATOM   2025  O5' DCP A  64     -10.951   9.713  -7.890  0.00  0.00           O  
ATOM   2026  C4' DCP A  64     -11.939   7.518  -8.360  3.00  0.00           C  
ATOM   2027  O4' DCP A  64     -13.041   7.854  -7.500  9.00  0.00           O  
ATOM   2028  C3' DCP A  64     -12.556   7.737  -9.720  6.00  0.00           C  
ATOM   2029  O3' DCP A  64     -11.595   7.182 -10.640  6.00  0.00           O  
ATOM   2030  C2' DCP A  64     -13.906   7.169  -9.640  9.00  0.00           C  
ATOM   2031  C1' DCP A  64     -14.285   7.480  -8.130  3.00  0.00           C  
ATOM   2032  N1  DCP A  64     -15.265   8.584  -8.030  1.00  0.00           N  
ATOM   2033  C2  DCP A  64     -16.546   8.350  -7.590  3.00  0.00           C  
ATOM   2034  O2  DCP A  64     -16.906   7.199  -7.420  5.00  0.00           O  
ATOM   2035  N3  DCP A  64     -17.315   9.420  -7.380  1.00  0.00           N  
ATOM   2036  C4  DCP A  64     -16.931  10.659  -7.580  3.00  0.00           C  
ATOM   2037  N4  DCP A  64     -17.855  11.499  -7.300  2.00  0.00           N  
ATOM   2038  C5  DCP A  64     -15.618  10.936  -8.050  3.00  0.00           C  
ATOM   2039  C6  DCP A  64     -14.844   9.885  -8.310  5.00  0.00           C  
ATOM   2040  OP1 DCP A  64      -8.723  10.342  -7.040  7.00  0.00           O  
ATOM   2041  OP2 DCP A  64     -10.604  11.924  -7.060  8.00  0.00           O  
ATOM   2042  H3  DCP A  64     -18.267   9.192  -7.010  2.00  0.00           H  
ATOM   2043  H5  DCP A  64     -15.314  11.919  -8.220  3.00  0.00           H  
ATOM   2044  H6  DCP A  64     -13.787  10.204  -8.470  1.00  0.00           H  
ATOM   2045  H1' DCP A  64     -14.650   6.541  -7.710  9.00  0.00           H  
ATOM   2046  H2' DCP A  64     -14.561   7.794 -10.300  6.00  0.00           H  
ATOM   2047  H3' DCP A  64     -12.607   8.839  -9.910  6.00  0.00           H  
ATOM   2048  H4' DCP A  64     -11.825   6.425  -8.250  5.00  0.00           H  
ATOM   2049  H41 DCP A  64     -18.797  11.296  -7.040  8.00  0.00           H  
ATOM   2050  H5' DCP A  64     -10.206   7.825  -7.220  9.00  0.00           H  
ATOM   2051  H42 DCP A  64     -17.740  12.517  -7.370  2.00  0.00           H  
ATOM   2052 H2'' DCP A  64     -13.881   6.071  -9.900  0.00  0.00           H  
ATOM   2053 H5'' DCP A  64      -9.917   8.134  -8.730  3.00  0.00           H  
ATOM   2054  P   DCP A  65     -11.373   7.894 -12.010  6.00  0.00           P  
ATOM   2055  C5' DCP A  65     -12.038   5.662 -13.170  1.00  0.00           C  
ATOM   2056  O5' DCP A  65     -12.324   7.010 -12.960  5.00  0.00           O  
ATOM   2057  C4' DCP A  65     -13.287   4.996 -13.810  6.00  0.00           C  
ATOM   2058  O4' DCP A  65     -14.353   5.318 -12.940  8.00  0.00           O  
ATOM   2059  C3' DCP A  65     -13.577   5.329 -15.290  6.00  0.00           C  
ATOM   2060  O3' DCP A  65     -12.794   4.485 -16.050  9.00  0.00           O  
ATOM   2061  C2' DCP A  65     -15.089   4.929 -15.160  3.00  0.00           C  
ATOM   2062  C1' DCP A  65     -15.542   5.501 -13.730  4.00  0.00           C  
ATOM   2063  N1  DCP A  65     -16.187   6.853 -13.770  4.00  0.00           N  
ATOM   2064  C2  DCP A  65     -17.569   6.879 -13.550  0.00  0.00           C  
ATOM   2065  O2  DCP A  65     -18.323   5.925 -13.280  4.00  0.00           O  
ATOM   2066  N3  DCP A  65     -18.253   8.014 -13.640  5.00  0.00           N  
ATOM   2067  C4  DCP A  65     -17.602   9.166 -13.880  7.00  0.00           C  
ATOM   2068  N4  DCP A  65     -18.294  10.274 -13.970  5.00  0.00           N  
ATOM   2069  C5  DCP A  65     -16.250   9.179 -14.240  1.00  0.00           C  
ATOM   2070  C6  DCP A  65     -15.514   8.015 -14.100  4.00  0.00           C  
ATOM   2071  OP1 DCP A  65     -10.033   7.607 -12.440  6.00  0.00           O  
ATOM   2072  OP2 DCP A  65     -11.819   9.299 -11.990  0.00  0.00           O  
ATOM   2073  H3  DCP A  65     -19.226   7.995 -13.490  6.00  0.00           H  
ATOM   2074  H5  DCP A  65     -15.769  10.111 -14.640  2.00  0.00           H  
ATOM   2075  H6  DCP A  65     -14.480   7.852 -14.300  2.00  0.00           H  
ATOM   2076  H1' DCP A  65     -16.263   4.829 -13.300  0.00  0.00           H  
ATOM   2077  H2' DCP A  65     -15.814   5.269 -15.900  2.00  0.00           H  
ATOM   2078  H3' DCP A  65     -13.509   6.360 -15.500  7.00  0.00           H  
ATOM   2079  H4' DCP A  65     -13.074   3.922 -13.760  0.00  0.00           H  
ATOM   2080  H41 DCP A  65     -19.300  10.308 -13.780  7.00  0.00           H  
ATOM   2081  H5' DCP A  65     -11.848   5.265 -12.180  1.00  0.00           H  
ATOM   2082  H42 DCP A  65     -17.787  11.117 -14.270  8.00  0.00           H  
ATOM   2083 H2'' DCP A  65     -15.292   3.906 -15.110  3.00  0.00           H  
ATOM   2084 H5'' DCP A  65     -11.146   5.584 -13.780  9.00  0.00           H  
ATOM   2085  P   DCP A  66     -12.872   4.671 -17.630  0.00  0.00           P  
ATOM   2086  C5' DCP A  66     -14.898   2.900 -17.940  3.00  0.00           C  
ATOM   2087  O5' DCP A  66     -14.318   4.232 -18.190  2.00  0.00           O  
ATOM   2088  C4' DCP A  66     -16.090   2.460 -18.770  1.00  0.00           C  
ATOM   2089  O4' DCP A  66     -17.019   3.430 -18.570  0.00  0.00           O  
ATOM   2090  C3' DCP A  66     -15.794   2.306 -20.260  4.00  0.00           C  
ATOM   2091  O3' DCP A  66     -16.367   1.102 -20.640  9.00  0.00           O  
ATOM   2092  C2' DCP A  66     -16.402   3.550 -20.850  9.00  0.00           C  
ATOM   2093  C1' DCP A  66     -17.443   3.893 -19.810  2.00  0.00           C  
ATOM   2094  N1  DCP A  66     -17.876   5.312 -19.740  2.00  0.00           N  
ATOM   2095  C2  DCP A  66     -19.287   5.611 -19.620  9.00  0.00           C  
ATOM   2096  O2  DCP A  66     -20.135   4.796 -19.460  2.00  0.00           O  
ATOM   2097  N3  DCP A  66     -19.626   6.869 -19.710  9.00  0.00           N  
ATOM   2098  C4  DCP A  66     -18.764   7.864 -19.880  7.00  0.00           C  
ATOM   2099  N4  DCP A  66     -19.239   9.068 -20.120  2.00  0.00           N  
ATOM   2100  C5  DCP A  66     -17.354   7.614 -19.880  5.00  0.00           C  
ATOM   2101  C6  DCP A  66     -17.004   6.334 -19.760  1.00  0.00           C  
ATOM   2102  OP1 DCP A  66     -11.827   3.708 -18.090  6.00  0.00           O  
ATOM   2103  OP2 DCP A  66     -12.708   6.076 -17.940  3.00  0.00           O  
ATOM   2104  H3  DCP A  66     -20.682   7.132 -19.680  4.00  0.00           H  
ATOM   2105  H5  DCP A  66     -16.553   8.322 -19.900  7.00  0.00           H  
ATOM   2106  H6  DCP A  66     -15.950   6.145 -19.840  3.00  0.00           H  
ATOM   2107  H1' DCP A  66     -18.325   3.261 -20.080  7.00  0.00           H  
ATOM   2108  H2' DCP A  66     -15.554   4.336 -20.880  8.00  0.00           H  
ATOM   2109  H3' DCP A  66     -14.738   2.248 -20.490  9.00  0.00           H  
ATOM   2110  H4' DCP A  66     -16.486   1.514 -18.380  4.00  0.00           H  
ATOM   2111  H41 DCP A  66     -20.155   9.304 -19.990  0.00  0.00           H  
ATOM   2112  H5' DCP A  66     -15.134   2.910 -16.900  1.00  0.00           H  
ATOM   2113  H42 DCP A  66     -18.511   9.738 -20.410  1.00  0.00           H  
ATOM   2114 H2'' DCP A  66     -16.914   3.291 -21.750  3.00  0.00           H  
ATOM   2115 H5'' DCP A  66     -14.126   2.137 -18.090  0.00  0.00           H  
ATOM   2116  P    DT A  67     -15.754  -0.345 -20.460  1.00  0.00           P  
ATOM   2117  C5'  DT A  67     -18.296  -0.978 -19.930  5.00  0.00           C  
ATOM   2118  O5'  DT A  67     -17.188  -1.091 -20.780  4.00  0.00           O  
ATOM   2119  C4'  DT A  67     -19.615  -1.421 -20.560  2.00  0.00           C  
ATOM   2120  O4'  DT A  67     -20.020  -0.445 -21.480  9.00  0.00           O  
ATOM   2121  C3'  DT A  67     -19.520  -2.795 -21.320  6.00  0.00           C  
ATOM   2122  O3'  DT A  67     -20.776  -3.520 -21.250  6.00  0.00           O  
ATOM   2123  C2'  DT A  67     -19.160  -2.241 -22.730  4.00  0.00           C  
ATOM   2124  C1'  DT A  67     -20.046  -1.040 -22.750  6.00  0.00           C  
ATOM   2125  N1   DT A  67     -19.633  -0.026 -23.770  0.00  0.00           N  
ATOM   2126  C2   DT A  67     -20.639   0.637 -24.480  6.00  0.00           C  
ATOM   2127  O2   DT A  67     -21.827   0.312 -24.440  9.00  0.00           O  
ATOM   2128  N3   DT A  67     -20.266   1.688 -25.220  9.00  0.00           N  
ATOM   2129  C4   DT A  67     -18.949   2.072 -25.430  2.00  0.00           C  
ATOM   2130  O4   DT A  67     -18.665   2.855 -26.340  9.00  0.00           O  
ATOM   2131  C5   DT A  67     -17.949   1.488 -24.540  0.00  0.00           C  
ATOM   2132  C6   DT A  67     -18.343   0.523 -23.680  3.00  0.00           C  
ATOM   2133  C7   DT A  67     -16.517   1.993 -24.490  9.00  0.00           C  
ATOM   2134  OP1  DT A  67     -15.371  -0.676 -19.100  5.00  0.00           O  
ATOM   2135  OP2  DT A  67     -14.836  -0.627 -21.550  4.00  0.00           O1-
ATOM   2136  H3   DT A  67     -20.998   2.275 -25.700  2.00  0.00           H  
ATOM   2137  H6   DT A  67     -17.702   0.134 -22.840  4.00  0.00           H  
ATOM   2138  H1'  DT A  67     -21.045  -1.464 -23.010  4.00  0.00           H  
ATOM   2139  H2'  DT A  67     -18.083  -2.079 -22.770  8.00  0.00           H  
ATOM   2140  H3'  DT A  67     -18.744  -3.356 -20.870  0.00  0.00           H  
ATOM   2141  H4'  DT A  67     -20.396  -1.506 -19.830  4.00  0.00           H  
ATOM   2142  H5'  DT A  67     -18.449   0.029 -19.600  5.00  0.00           H  
ATOM   2143  H71  DT A  67     -16.169   1.975 -25.540  2.00  0.00           H  
ATOM   2144  H72  DT A  67     -15.947   1.466 -23.780  0.00  0.00           H  
ATOM   2145  H73  DT A  67     -16.460   2.988 -24.100  4.00  0.00           H  
ATOM   2146 H2''  DT A  67     -19.355  -2.911 -23.580  5.00  0.00           H  
ATOM   2147 H5''  DT A  67     -18.080  -1.618 -19.080  2.00  0.00           H  
ATOM   2148  P    DA A  68     -21.011  -4.863 -22.060  8.00  0.00           P  
ATOM   2149  C5'  DA A  68     -22.729  -3.714 -23.550  9.00  0.00           C  
ATOM   2150  O5'  DA A  68     -21.493  -4.375 -23.480  2.00  0.00           O  
ATOM   2151  C4'  DA A  68     -23.003  -3.025 -24.910  1.00  0.00           C  
ATOM   2152  O4'  DA A  68     -21.825  -2.446 -25.310  8.00  0.00           O  
ATOM   2153  C3'  DA A  68     -23.352  -4.038 -26.070  9.00  0.00           C  
ATOM   2154  O3'  DA A  68     -24.236  -3.374 -26.980  1.00  0.00           O  
ATOM   2155  C2'  DA A  68     -22.036  -4.175 -26.800  6.00  0.00           C  
ATOM   2156  C1'  DA A  68     -21.362  -2.834 -26.590  7.00  0.00           C  
ATOM   2157  N1   DA A  68     -17.143  -0.214 -27.830  7.00  0.00           N  
ATOM   2158  C2   DA A  68     -18.427   0.045 -28.100  3.00  0.00           C  
ATOM   2159  N3   DA A  68     -19.526  -0.706 -27.770  1.00  0.00           N  
ATOM   2160  C4   DA A  68     -19.102  -1.858 -27.160  3.00  0.00           C  
ATOM   2161  C5   DA A  68     -17.851  -2.162 -26.670  5.00  0.00           C  
ATOM   2162  C6   DA A  68     -16.851  -1.200 -27.050  4.00  0.00           C  
ATOM   2163  N6   DA A  68     -15.542  -1.140 -26.840  6.00  0.00           N  
ATOM   2164  N7   DA A  68     -17.808  -3.336 -25.930  6.00  0.00           N  
ATOM   2165  C8   DA A  68     -19.108  -3.698 -25.850  2.00  0.00           C  
ATOM   2166  N9   DA A  68     -19.916  -2.864 -26.630  9.00  0.00           N  
ATOM   2167  OP1  DA A  68     -22.150  -5.593 -21.540  1.00  0.00           O  
ATOM   2168  OP2  DA A  68     -19.822  -5.657 -22.270  2.00  0.00           O1-
ATOM   2169  H2   DA A  68     -18.678   0.921 -28.610  9.00  0.00           H  
ATOM   2170  H8   DA A  68     -19.487  -4.569 -25.300  6.00  0.00           H  
ATOM   2171  H1'  DA A  68     -21.734  -2.111 -27.360  5.00  0.00           H  
ATOM   2172  H2'  DA A  68     -21.333  -4.944 -26.440  0.00  0.00           H  
ATOM   2173  H3'  DA A  68     -23.742  -5.101 -25.640  0.00  0.00           H  
ATOM   2174  H4'  DA A  68     -23.788  -2.342 -24.770  2.00  0.00           H  
ATOM   2175  H5'  DA A  68     -22.867  -2.975 -22.790  6.00  0.00           H  
ATOM   2176  H61  DA A  68     -14.950  -0.482 -27.380  9.00  0.00           H  
ATOM   2177  H62  DA A  68     -15.174  -1.952 -26.350  0.00  0.00           H  
ATOM   2178 H2''  DA A  68     -22.111  -4.518 -27.810  4.00  0.00           H  
ATOM   2179 H5''  DA A  68     -23.468  -4.577 -23.480  9.00  0.00           H  
ATOM   2180  P    DA A  69     -25.785  -3.272 -26.680  6.00  0.00           P  
ATOM   2181  C5'  DA A  69     -25.713  -0.690 -26.310  7.00  0.00           C  
ATOM   2182  O5'  DA A  69     -25.908  -1.981 -25.840  5.00  0.00           O  
ATOM   2183  C4'  DA A  69     -25.111   0.309 -25.240  9.00  0.00           C  
ATOM   2184  O4'  DA A  69     -24.809   1.462 -25.920  8.00  0.00           O  
ATOM   2185  C3'  DA A  69     -26.156   0.583 -24.110  3.00  0.00           C  
ATOM   2186  O3'  DA A  69     -25.558   0.382 -22.900  0.00  0.00           O  
ATOM   2187  C2'  DA A  69     -26.432   2.120 -24.360  0.00  0.00           C  
ATOM   2188  C1'  DA A  69     -25.044   2.464 -24.940  5.00  0.00           C  
ATOM   2189  N1   DA A  69     -21.576   6.197 -25.690  6.00  0.00           N  
ATOM   2190  C2   DA A  69     -21.406   4.878 -25.520  9.00  0.00           C  
ATOM   2191  N3   DA A  69     -22.326   3.928 -25.530  8.00  0.00           N  
ATOM   2192  C4   DA A  69     -23.604   4.487 -25.680  2.00  0.00           C  
ATOM   2193  C5   DA A  69     -23.892   5.845 -25.970  0.00  0.00           C  
ATOM   2194  C6   DA A  69     -22.786   6.660 -25.970  1.00  0.00           C  
ATOM   2195  N6   DA A  69     -22.745   7.994 -26.080  7.00  0.00           N  
ATOM   2196  N7   DA A  69     -25.284   5.946 -26.090  7.00  0.00           N  
ATOM   2197  C8   DA A  69     -25.775   4.762 -25.720  1.00  0.00           C  
ATOM   2198  N9   DA A  69     -24.829   3.807 -25.480  2.00  0.00           N  
ATOM   2199  OP1  DA A  69     -26.272  -4.305 -25.770  5.00  0.00           O  
ATOM   2200  OP2  DA A  69     -26.397  -2.987 -27.920  8.00  0.00           O1-
ATOM   2201  H2   DA A  69     -20.407   4.505 -25.350  5.00  0.00           H  
ATOM   2202  H8   DA A  69     -26.799   4.622 -25.620  8.00  0.00           H  
ATOM   2203  H1'  DA A  69     -24.284   2.239 -24.140  9.00  0.00           H  
ATOM   2204  H2'  DA A  69     -27.345   2.375 -24.980  1.00  0.00           H  
ATOM   2205  H3'  DA A  69     -27.104  -0.005 -24.130  6.00  0.00           H  
ATOM   2206  H4'  DA A  69     -24.236  -0.056 -24.750  4.00  0.00           H  
ATOM   2207  H5'  DA A  69     -26.640  -0.292 -26.650  7.00  0.00           H  
ATOM   2208  H61  DA A  69     -21.855   8.503 -26.010  7.00  0.00           H  
ATOM   2209  H62  DA A  69     -23.608   8.526 -26.320  9.00  0.00           H  
ATOM   2210 H2''  DA A  69     -26.568   2.730 -23.440  7.00  0.00           H  
ATOM   2211 H5''  DA A  69     -25.055  -0.785 -27.230  0.00  0.00           H  
ATOM   2212  P    DC A  70     -26.377  -0.235 -21.770  9.00  0.00           P  
ATOM   2213  C5'  DC A  70     -24.402  -1.348 -20.430  6.00  0.00           C  
ATOM   2214  O5'  DC A  70     -25.477  -0.427 -20.500  4.00  0.00           O  
ATOM   2215  C4'  DC A  70     -23.049  -0.641 -20.550  4.00  0.00           C  
ATOM   2216  O4'  DC A  70     -23.060   0.369 -21.520  7.00  0.00           O  
ATOM   2217  C3'  DC A  70     -22.797   0.236 -19.260  4.00  0.00           C  
ATOM   2218  O3'  DC A  70     -22.417  -0.613 -18.210  1.00  0.00           O  
ATOM   2219  C2'  DC A  70     -21.873   1.332 -19.720  7.00  0.00           C  
ATOM   2220  C1'  DC A  70     -22.164   1.485 -21.190  9.00  0.00           C  
ATOM   2221  N1   DC A  70     -22.799   2.798 -21.590  9.00  0.00           N  
ATOM   2222  C2   DC A  70     -21.996   3.873 -22.060  9.00  0.00           C  
ATOM   2223  O2   DC A  70     -20.794   3.817 -22.140  0.00  0.00           O  
ATOM   2224  N3   DC A  70     -22.543   5.060 -22.520  9.00  0.00           N  
ATOM   2225  C4   DC A  70     -23.878   5.124 -22.370  6.00  0.00           C  
ATOM   2226  N4   DC A  70     -24.409   6.262 -22.680  5.00  0.00           N  
ATOM   2227  C5   DC A  70     -24.732   4.157 -21.910  1.00  0.00           C  
ATOM   2228  C6   DC A  70     -24.163   3.009 -21.390  9.00  0.00           C  
ATOM   2229  OP1  DC A  70     -26.838  -1.548 -22.210  8.00  0.00           O  
ATOM   2230  OP2  DC A  70     -27.481   0.786 -21.470  2.00  0.00           O1-
ATOM   2231  H5   DC A  70     -25.852   4.344 -21.790  0.00  0.00           H  
ATOM   2232  H6   DC A  70     -24.663   2.209 -20.870  6.00  0.00           H  
ATOM   2233  H1'  DC A  70     -21.260   1.316 -21.760  0.00  0.00           H  
ATOM   2234  H2'  DC A  70     -22.058   2.306 -19.300  7.00  0.00           H  
ATOM   2235  H3'  DC A  70     -23.707   0.721 -18.970  7.00  0.00           H  
ATOM   2236  H4'  DC A  70     -22.242  -1.352 -20.770  3.00  0.00           H  
ATOM   2237  H41  DC A  70     -23.850   7.000 -22.970  6.00  0.00           H  
ATOM   2238  H5'  DC A  70     -24.531  -2.129 -21.220  2.00  0.00           H  
ATOM   2239  H42  DC A  70     -25.388   6.457 -22.430  7.00  0.00           H  
ATOM   2240 H2''  DC A  70     -20.843   1.047 -19.470  5.00  0.00           H  
ATOM   2241 H5''  DC A  70     -24.359  -1.957 -19.470  8.00  0.00           H  
ATOM   2242  P    DC A  71     -22.712  -0.263 -16.660  5.00  0.00           P  
ATOM   2243  C5'  DC A  71     -20.191   0.138 -16.480  1.00  0.00           C  
ATOM   2244  O5'  DC A  71     -21.488   0.625 -16.240  2.00  0.00           O  
ATOM   2245  C4'  DC A  71     -19.073   1.272 -16.400  9.00  0.00           C  
ATOM   2246  O4'  DC A  71     -19.493   2.553 -16.940  2.00  0.00           O  
ATOM   2247  C3'  DC A  71     -18.429   1.555 -15.020  8.00  0.00           C  
ATOM   2248  O3'  DC A  71     -16.982   1.625 -15.010  2.00  0.00           O  
ATOM   2249  C2'  DC A  71     -19.042   2.890 -14.640  5.00  0.00           C  
ATOM   2250  C1'  DC A  71     -19.190   3.563 -16.000  2.00  0.00           C  
ATOM   2251  N1   DC A  71     -20.244   4.580 -16.020  1.00  0.00           N  
ATOM   2252  C2   DC A  71     -19.986   5.912 -16.230  5.00  0.00           C  
ATOM   2253  O2   DC A  71     -18.846   6.396 -16.320  7.00  0.00           O  
ATOM   2254  N3   DC A  71     -20.999   6.860 -16.210  8.00  0.00           N  
ATOM   2255  C4   DC A  71     -22.192   6.387 -15.990  9.00  0.00           C  
ATOM   2256  N4   DC A  71     -23.125   7.265 -16.060  6.00  0.00           N  
ATOM   2257  C5   DC A  71     -22.556   5.068 -15.620  3.00  0.00           C  
ATOM   2258  C6   DC A  71     -21.520   4.176 -15.720  8.00  0.00           C  
ATOM   2259  OP1  DC A  71     -22.677  -1.467 -15.790  5.00  0.00           O  
ATOM   2260  OP2  DC A  71     -23.914   0.573 -16.620  5.00  0.00           O1-
ATOM   2261  H5   DC A  71     -23.498   4.707 -15.370  4.00  0.00           H  
ATOM   2262  H6   DC A  71     -21.650   3.094 -15.530  4.00  0.00           H  
ATOM   2263  H1'  DC A  71     -18.214   4.005 -16.250  9.00  0.00           H  
ATOM   2264  H2'  DC A  71     -20.042   2.590 -14.250  2.00  0.00           H  
ATOM   2265  H3'  DC A  71     -18.797   0.893 -14.210  4.00  0.00           H  
ATOM   2266  H4'  DC A  71     -18.240   0.866 -17.000  1.00  0.00           H  
ATOM   2267  H41  DC A  71     -22.870   8.227 -16.310  9.00  0.00           H  
ATOM   2268  H5'  DC A  71     -20.083  -0.263 -17.500  9.00  0.00           H  
ATOM   2269  H42  DC A  71     -24.010   6.970 -15.890  1.00  0.00           H  
ATOM   2270 H2''  DC A  71     -18.441   3.507 -13.930  1.00  0.00           H  
ATOM   2271 H5''  DC A  71     -19.830  -0.664 -15.810  3.00  0.00           H  
ATOM   2272  P    DC A  72     -16.210   1.121 -13.720  7.00  0.00           P  
ATOM   2273  C5'  DC A  72     -15.977   2.172 -11.350  8.00  0.00           C  
ATOM   2274  O5'  DC A  72     -16.329   2.381 -12.700  6.00  0.00           O  
ATOM   2275  C4'  DC A  72     -15.799   3.401 -10.470  6.00  0.00           C  
ATOM   2276  O4'  DC A  72     -16.953   4.149 -10.750  8.00  0.00           O  
ATOM   2277  C3'  DC A  72     -15.771   3.176  -8.930  9.00  0.00           C  
ATOM   2278  O3'  DC A  72     -14.637   3.807  -8.320  8.00  0.00           O  
ATOM   2279  C2'  DC A  72     -17.132   3.840  -8.510  5.00  0.00           C  
ATOM   2280  C1'  DC A  72     -17.335   4.884  -9.600  1.00  0.00           C  
ATOM   2281  N1   DC A  72     -18.686   5.407  -9.800  5.00  0.00           N  
ATOM   2282  C2   DC A  72     -18.804   6.795 -10.080  3.00  0.00           C  
ATOM   2283  O2   DC A  72     -17.803   7.465 -10.300  1.00  0.00           O  
ATOM   2284  N3   DC A  72     -19.976   7.420  -9.990  3.00  0.00           N  
ATOM   2285  C4   DC A  72     -21.080   6.762  -9.740  6.00  0.00           C  
ATOM   2286  N4   DC A  72     -22.201   7.435  -9.650  8.00  0.00           N  
ATOM   2287  C5   DC A  72     -21.098   5.352  -9.420  3.00  0.00           C  
ATOM   2288  C6   DC A  72     -19.880   4.722  -9.500  7.00  0.00           C  
ATOM   2289  OP1  DC A  72     -14.804   0.818 -14.050  4.00  0.00           O  
ATOM   2290  OP2  DC A  72     -16.943   0.023 -13.080  5.00  0.00           O1-
ATOM   2291  H5   DC A  72     -21.973   4.856  -9.080  0.00  0.00           H  
ATOM   2292  H6   DC A  72     -19.795   3.714  -9.210  5.00  0.00           H  
ATOM   2293  H1'  DC A  72     -16.594   5.732  -9.420  0.00  0.00           H  
ATOM   2294  H2'  DC A  72     -17.977   3.094  -8.670  3.00  0.00           H  
ATOM   2295  H3'  DC A  72     -15.939   2.177  -8.600  3.00  0.00           H  
ATOM   2296  H4'  DC A  72     -14.909   3.892 -10.770  3.00  0.00           H  
ATOM   2297  H41  DC A  72     -22.167   8.479  -9.690  6.00  0.00           H  
ATOM   2298  H5'  DC A  72     -14.988   1.756 -11.440  1.00  0.00           H  
ATOM   2299  H42  DC A  72     -23.028   6.896  -9.370  0.00  0.00           H  
ATOM   2300 H2''  DC A  72     -17.046   4.250  -7.570  6.00  0.00           H  
ATOM   2301 H5''  DC A  72     -16.615   1.409 -10.880  5.00  0.00           H  
ATOM   2302  P    DT A  73     -13.238   2.995  -8.030  7.00  0.00           P  
ATOM   2303  C5'  DT A  73     -14.030   1.077  -6.270  9.00  0.00           C  
ATOM   2304  O5'  DT A  73     -13.502   2.398  -6.530  3.00  0.00           O  
ATOM   2305  C4'  DT A  73     -13.904   0.738  -4.810  4.00  0.00           C  
ATOM   2306  O4'  DT A  73     -12.557   0.934  -4.380  0.00  0.00           O  
ATOM   2307  C3'  DT A  73     -14.791   1.686  -3.890  3.00  0.00           C  
ATOM   2308  O3'  DT A  73     -15.321   1.034  -2.790  3.00  0.00           O  
ATOM   2309  C2'  DT A  73     -13.672   2.621  -3.460  6.00  0.00           C  
ATOM   2310  C1'  DT A  73     -12.543   1.746  -3.210  2.00  0.00           C  
ATOM   2311  N1   DT A  73     -11.198   2.383  -2.980  7.00  0.00           N  
ATOM   2312  C2   DT A  73     -10.651   2.225  -1.720  5.00  0.00           C  
ATOM   2313  O2   DT A  73     -11.347   2.002  -0.690  8.00  0.00           O  
ATOM   2314  N3   DT A  73      -9.319   2.664  -1.560  8.00  0.00           N  
ATOM   2315  C4   DT A  73      -8.522   3.179  -2.560  7.00  0.00           C  
ATOM   2316  O4   DT A  73      -7.392   3.497  -2.280  0.00  0.00           O  
ATOM   2317  C5   DT A  73      -9.209   3.350  -3.840  1.00  0.00           C  
ATOM   2318  C6   DT A  73     -10.500   3.008  -4.010  1.00  0.00           C  
ATOM   2319  C7   DT A  73      -8.408   4.020  -4.970  9.00  0.00           C  
ATOM   2320  OP1  DT A  73     -12.178   3.984  -8.010  2.00  0.00           O  
ATOM   2321  OP2  DT A  73     -13.160   1.811  -8.940  2.00  0.00           O1-
ATOM   2322  H3   DT A  73      -8.915   2.918  -0.720  2.00  0.00           H  
ATOM   2323  H6   DT A  73     -10.981   3.259  -4.910  4.00  0.00           H  
ATOM   2324  H1'  DT A  73     -12.851   1.050  -2.430  5.00  0.00           H  
ATOM   2325  H2'  DT A  73     -13.444   3.249  -4.290  1.00  0.00           H  
ATOM   2326  H3'  DT A  73     -15.592   2.200  -4.440  9.00  0.00           H  
ATOM   2327  H4'  DT A  73     -14.235  -0.232  -4.600  0.00  0.00           H  
ATOM   2328  H5'  DT A  73     -13.483   0.335  -6.800  9.00  0.00           H  
ATOM   2329  H71  DT A  73      -8.022   5.006  -4.740  5.00  0.00           H  
ATOM   2330  H72  DT A  73      -7.608   3.364  -5.250  2.00  0.00           H  
ATOM   2331  H73  DT A  73      -9.047   4.083  -5.810  4.00  0.00           H  
ATOM   2332 H2''  DT A  73     -13.905   3.185  -2.590  3.00  0.00           H  
ATOM   2333 H5''  DT A  73     -15.124   0.911  -6.590  4.00  0.00           H  
ATOM   2334  P    DA A  74     -16.532  -0.003  -2.870  3.00  0.00           P  
ATOM   2335  C5'  DA A  74     -18.999   0.452  -1.830  4.00  0.00           C  
ATOM   2336  O5'  DA A  74     -17.808   0.954  -2.490  3.00  0.00           O  
ATOM   2337  C4'  DA A  74     -19.826   1.641  -1.520  2.00  0.00           C  
ATOM   2338  O4'  DA A  74     -19.138   2.304  -0.440  5.00  0.00           O  
ATOM   2339  C3'  DA A  74     -20.008   2.680  -2.680  5.00  0.00           C  
ATOM   2340  O3'  DA A  74     -21.103   2.417  -3.540  9.00  0.00           O  
ATOM   2341  C2'  DA A  74     -20.323   3.872  -1.810  0.00  0.00           C  
ATOM   2342  C1'  DA A  74     -19.447   3.682  -0.590  9.00  0.00           C  
ATOM   2343  N1   DA A  74     -16.707   7.548   1.000  9.00  0.00           N  
ATOM   2344  C2   DA A  74     -17.983   7.230   1.210  5.00  0.00           C  
ATOM   2345  N3   DA A  74     -18.546   6.126   0.810  3.00  0.00           N  
ATOM   2346  C4   DA A  74     -17.712   5.394  -0.000  9.00  0.00           C  
ATOM   2347  C5   DA A  74     -16.476   5.636  -0.390  8.00  0.00           C  
ATOM   2348  C6   DA A  74     -16.037   6.818   0.150  5.00  0.00           C  
ATOM   2349  N6   DA A  74     -14.816   7.347  -0.050  7.00  0.00           N  
ATOM   2350  N7   DA A  74     -15.997   4.719  -1.300  8.00  0.00           N  
ATOM   2351  C8   DA A  74     -16.977   3.852  -1.510  8.00  0.00           C  
ATOM   2352  N9   DA A  74     -18.071   4.250  -0.690  1.00  0.00           N  
ATOM   2353  OP1  DA A  74     -16.327  -0.956  -1.780  2.00  0.00           O  
ATOM   2354  OP2  DA A  74     -16.632  -0.499  -4.290  3.00  0.00           O1-
ATOM   2355  H2   DA A  74     -18.558   7.951   1.750  0.00  0.00           H  
ATOM   2356  H8   DA A  74     -16.864   2.942  -1.990  1.00  0.00           H  
ATOM   2357  H1'  DA A  74     -20.005   4.031   0.280  9.00  0.00           H  
ATOM   2358  H2'  DA A  74     -20.176   4.755  -2.350  9.00  0.00           H  
ATOM   2359  H3'  DA A  74     -19.045   2.750  -3.160  7.00  0.00           H  
ATOM   2360  H4'  DA A  74     -20.856   1.327  -1.190  6.00  0.00           H  
ATOM   2361  H5'  DA A  74     -18.816  -0.105  -0.940  0.00  0.00           H  
ATOM   2362  H61  DA A  74     -14.536   8.259   0.240  6.00  0.00           H  
ATOM   2363  H62  DA A  74     -14.200   6.773  -0.590  5.00  0.00           H  
ATOM   2364 H2''  DA A  74     -21.366   3.825  -1.460  5.00  0.00           H  
ATOM   2365 H5''  DA A  74     -19.556  -0.256  -2.510  2.00  0.00           H  
ATOM   2366  P    DA A  75     -21.671   3.540  -4.530  3.00  0.00           P  
ATOM   2367  C5'  DA A  75     -23.833   4.179  -3.070  4.00  0.00           C  
ATOM   2368  O5'  DA A  75     -22.567   4.469  -3.680  8.00  0.00           O  
ATOM   2369  C4'  DA A  75     -24.447   5.403  -2.500  5.00  0.00           C  
ATOM   2370  O4'  DA A  75     -23.744   5.910  -1.450  4.00  0.00           O  
ATOM   2371  C3'  DA A  75     -24.587   6.515  -3.550  3.00  0.00           C  
ATOM   2372  O3'  DA A  75     -25.985   6.500  -3.970  6.00  0.00           O  
ATOM   2373  C2'  DA A  75     -24.428   7.797  -2.650  9.00  0.00           C  
ATOM   2374  C1'  DA A  75     -23.560   7.264  -1.470  5.00  0.00           C  
ATOM   2375  N1   DA A  75     -19.670  10.120   0.520  0.00  0.00           N  
ATOM   2376  C2   DA A  75     -20.906   9.769   0.900  9.00  0.00           C  
ATOM   2377  N3   DA A  75     -21.799   8.998   0.320  4.00  0.00           N  
ATOM   2378  C4   DA A  75     -21.395   8.424  -0.840  7.00  0.00           C  
ATOM   2379  C5   DA A  75     -20.175   8.639  -1.400  8.00  0.00           C  
ATOM   2380  C6   DA A  75     -19.295   9.511  -0.630  8.00  0.00           C  
ATOM   2381  N6   DA A  75     -18.041   9.760  -0.930  8.00  0.00           N  
ATOM   2382  N7   DA A  75     -20.146   8.029  -2.670  9.00  0.00           N  
ATOM   2383  C8   DA A  75     -21.335   7.514  -2.820  9.00  0.00           C  
ATOM   2384  N9   DA A  75     -22.104   7.678  -1.720  0.00  0.00           N  
ATOM   2385  OP1  DA A  75     -22.521   2.879  -5.510  6.00  0.00           O  
ATOM   2386  OP2  DA A  75     -20.512   4.210  -5.040  6.00  0.00           O1-
ATOM   2387  H2   DA A  75     -21.362  10.370   1.710  7.00  0.00           H  
ATOM   2388  H8   DA A  75     -21.607   6.768  -3.610  9.00  0.00           H  
ATOM   2389  H1'  DA A  75     -23.977   7.692  -0.530  3.00  0.00           H  
ATOM   2390  H2'  DA A  75     -23.825   8.473  -3.150  9.00  0.00           H  
ATOM   2391  H3'  DA A  75     -23.986   6.392  -4.400  0.00  0.00           H  
ATOM   2392  H4'  DA A  75     -25.340   5.105  -2.120  8.00  0.00           H  
ATOM   2393  H5'  DA A  75     -23.689   3.391  -2.390  8.00  0.00           H  
ATOM   2394  H61  DA A  75     -17.641  10.133  -0.050  3.00  0.00           H  
ATOM   2395  H62  DA A  75     -17.515   9.321  -1.710  8.00  0.00           H  
ATOM   2396 H2''  DA A  75     -25.418   8.046  -2.200  0.00  0.00           H  
ATOM   2397 H5''  DA A  75     -24.597   3.785  -3.810  2.00  0.00           H  
ATOM   2398  P    DC A  76     -26.466   6.495  -5.540  5.00  0.00           P  
ATOM   2399  C5'  DC A  76     -26.315   9.156  -5.440  1.00  0.00           C  
ATOM   2400  O5'  DC A  76     -25.930   7.909  -5.960  1.00  0.00           O  
ATOM   2401  C4'  DC A  76     -25.518  10.410  -6.000  1.00  0.00           C  
ATOM   2402  O4'  DC A  76     -24.190  10.302  -5.500  8.00  0.00           O  
ATOM   2403  C3'  DC A  76     -25.470  10.696  -7.440  2.00  0.00           C  
ATOM   2404  O3'  DC A  76     -25.426  12.089  -7.700  3.00  0.00           O  
ATOM   2405  C2'  DC A  76     -24.160  10.084  -7.820  3.00  0.00           C  
ATOM   2406  C1'  DC A  76     -23.333  10.306  -6.570  7.00  0.00           C  
ATOM   2407  N1   DC A  76     -22.254   9.369  -6.270  0.00  0.00           N  
ATOM   2408  C2   DC A  76     -20.930   9.624  -6.670  6.00  0.00           C  
ATOM   2409  O2   DC A  76     -20.554  10.776  -6.910  0.00  0.00           O  
ATOM   2410  N3   DC A  76     -20.061   8.588  -6.800  7.00  0.00           N  
ATOM   2411  C4   DC A  76     -20.468   7.371  -6.590  3.00  0.00           C  
ATOM   2412  N4   DC A  76     -19.590   6.395  -6.740  0.00  0.00           N  
ATOM   2413  C5   DC A  76     -21.781   7.083  -6.200  6.00  0.00           C  
ATOM   2414  C6   DC A  76     -22.689   8.092  -6.150  9.00  0.00           C  
ATOM   2415  OP1  DC A  76     -27.934   6.401  -5.660  6.00  0.00           O  
ATOM   2416  OP2  DC A  76     -25.647   5.571  -6.380  3.00  0.00           O1-
ATOM   2417  H5   DC A  76     -22.094   6.113  -5.910  6.00  0.00           H  
ATOM   2418  H6   DC A  76     -23.707   7.896  -5.880  5.00  0.00           H  
ATOM   2419  H1'  DC A  76     -22.914  11.333  -6.630  0.00  0.00           H  
ATOM   2420  H2'  DC A  76     -24.184   9.009  -8.030  7.00  0.00           H  
ATOM   2421  H3'  DC A  76     -26.372  10.195  -7.860  5.00  0.00           H  
ATOM   2422  H4'  DC A  76     -26.024  11.265  -5.500  7.00  0.00           H  
ATOM   2423  H41  DC A  76     -18.717   6.653  -7.170  1.00  0.00           H  
ATOM   2424  H5'  DC A  76     -26.030   9.135  -4.380  2.00  0.00           H  
ATOM   2425  H42  DC A  76     -19.800   5.483  -6.380  2.00  0.00           H  
ATOM   2426 H2''  DC A  76     -23.867  10.689  -8.710  2.00  0.00           H  
ATOM   2427 H5''  DC A  76     -27.398   9.317  -5.510  5.00  0.00           H  
ATOM   2428  P    DC A  77     -26.474  12.823  -8.680  3.00  0.00           P  
ATOM   2429  C5'  DC A  77     -26.448  11.359 -10.940  4.00  0.00           C  
ATOM   2430  O5'  DC A  77     -26.105  12.539 -10.230  2.00  0.00           O  
ATOM   2431  C4'  DC A  77     -25.727  11.483 -12.300  1.00  0.00           C  
ATOM   2432  O4'  DC A  77     -24.412  11.021 -12.060  8.00  0.00           O  
ATOM   2433  C3'  DC A  77     -26.267  10.471 -13.280  6.00  0.00           C  
ATOM   2434  O3'  DC A  77     -27.369  11.012 -14.010  9.00  0.00           O  
ATOM   2435  C2'  DC A  77     -25.083  10.181 -14.190  6.00  0.00           C  
ATOM   2436  C1'  DC A  77     -23.902  10.509 -13.240  5.00  0.00           C  
ATOM   2437  N1   DC A  77     -23.145   9.239 -12.980  4.00  0.00           N  
ATOM   2438  C2   DC A  77     -21.790   9.110 -13.280  2.00  0.00           C  
ATOM   2439  O2   DC A  77     -21.163  10.073 -13.660  1.00  0.00           O  
ATOM   2440  N3   DC A  77     -21.148   8.003 -13.130  0.00  0.00           N  
ATOM   2441  C4   DC A  77     -21.794   6.919 -12.840  9.00  0.00           C  
ATOM   2442  N4   DC A  77     -21.152   5.837 -12.880  6.00  0.00           N  
ATOM   2443  C5   DC A  77     -23.200   6.929 -12.510  7.00  0.00           C  
ATOM   2444  C6   DC A  77     -23.837   8.095 -12.570  2.00  0.00           C  
ATOM   2445  OP1  DC A  77     -26.401  14.256  -8.360  1.00  0.00           O  
ATOM   2446  OP2  DC A  77     -27.748  12.131  -8.460  1.00  0.00           O1-
ATOM   2447  H5   DC A  77     -23.742   6.061 -12.230  7.00  0.00           H  
ATOM   2448  H6   DC A  77     -24.889   8.094 -12.200  7.00  0.00           H  
ATOM   2449  H1'  DC A  77     -23.283  11.320 -13.680  7.00  0.00           H  
ATOM   2450  H2'  DC A  77     -25.075   9.151 -14.570  8.00  0.00           H  
ATOM   2451  H3'  DC A  77     -26.494   9.551 -12.810  6.00  0.00           H  
ATOM   2452  H4'  DC A  77     -25.792  12.523 -12.630  7.00  0.00           H  
ATOM   2453  H41  DC A  77     -20.149   5.818 -13.020  9.00  0.00           H  
ATOM   2454  H5'  DC A  77     -27.517  11.293 -11.070  5.00  0.00           H  
ATOM   2455  H42  DC A  77     -21.639   4.996 -12.460  5.00  0.00           H  
ATOM   2456 H2''  DC A  77     -25.067  10.748 -15.130  2.00  0.00           H  
ATOM   2457 H5''  DC A  77     -26.213  10.462 -10.360  4.00  0.00           H  
ATOM   2458  P    DC A  78     -28.243  10.101 -15.080  1.00  0.00           P  
ATOM   2459  C5'  DC A  78     -27.448  11.322 -17.180  9.00  0.00           C  
ATOM   2460  O5'  DC A  78     -27.430  10.169 -16.370  1.00  0.00           O  
ATOM   2461  C4'  DC A  78     -26.481  11.161 -18.360  1.00  0.00           C  
ATOM   2462  O4'  DC A  78     -25.249  10.474 -18.000  1.00  0.00           O  
ATOM   2463  C3'  DC A  78     -27.093  10.332 -19.520  1.00  0.00           C  
ATOM   2464  O3'  DC A  78     -28.025  11.048 -20.310  9.00  0.00           O  
ATOM   2465  C2'  DC A  78     -25.821   9.952 -20.280  3.00  0.00           C  
ATOM   2466  C1'  DC A  78     -24.744   9.952 -19.180  3.00  0.00           C  
ATOM   2467  N1   DC A  78     -24.209   8.582 -18.980  5.00  0.00           N  
ATOM   2468  C2   DC A  78     -22.872   8.277 -19.340  2.00  0.00           C  
ATOM   2469  O2   DC A  78     -22.014   9.146 -19.600  0.00  0.00           O  
ATOM   2470  N3   DC A  78     -22.494   7.001 -19.460  5.00  0.00           N  
ATOM   2471  C4   DC A  78     -23.401   6.040 -19.150  7.00  0.00           C  
ATOM   2472  N4   DC A  78     -22.885   4.857 -19.070  4.00  0.00           N  
ATOM   2473  C5   DC A  78     -24.671   6.280 -18.570  5.00  0.00           C  
ATOM   2474  C6   DC A  78     -25.045   7.568 -18.490  4.00  0.00           C  
ATOM   2475  OP1  DC A  78     -29.556  10.724 -15.140  8.00  0.00           O  
ATOM   2476  OP2  DC A  78     -28.208   8.678 -14.550  2.00  0.00           O1-
ATOM   2477  H5   DC A  78     -25.355   5.565 -18.170  0.00  0.00           H  
ATOM   2478  H6   DC A  78     -25.938   7.820 -17.890  6.00  0.00           H  
ATOM   2479  H1'  DC A  78     -23.980  10.714 -19.470  4.00  0.00           H  
ATOM   2480  H2'  DC A  78     -25.939   8.908 -20.780  0.00  0.00           H  
ATOM   2481  H3'  DC A  78     -27.448   9.472 -19.010  6.00  0.00           H  
ATOM   2482  H4'  DC A  78     -26.244  12.152 -18.830  8.00  0.00           H  
ATOM   2483  H41  DC A  78     -21.875   4.823 -19.170  4.00  0.00           H  
ATOM   2484  H5'  DC A  78     -27.131  12.111 -16.520  4.00  0.00           H  
ATOM   2485  H42  DC A  78     -23.320   4.139 -18.530  9.00  0.00           H  
ATOM   2486 H2''  DC A  78     -25.605  10.768 -20.950  7.00  0.00           H  
ATOM   2487 H5''  DC A  78     -28.549  11.537 -17.440  7.00  0.00           H  
ATOM   2488  P    DT A  79     -29.299  10.496 -21.010  4.00  0.00           P  
ATOM   2489  C5'  DT A  79     -28.513  10.856 -23.530  3.00  0.00           C  
ATOM   2490  O5'  DT A  79     -29.300  11.249 -22.440  1.00  0.00           O  
ATOM   2491  C4'  DT A  79     -28.506  11.915 -24.720  2.00  0.00           C  
ATOM   2492  O4'  DT A  79     -27.746  11.356 -25.820  6.00  0.00           O  
ATOM   2493  C3'  DT A  79     -29.829  12.336 -25.360  9.00  0.00           C  
ATOM   2494  O3'  DT A  79     -29.734  13.712 -25.740  1.00  0.00           O  
ATOM   2495  C2'  DT A  79     -29.885  11.416 -26.550  7.00  0.00           C  
ATOM   2496  C1'  DT A  79     -28.466  11.397 -27.050  5.00  0.00           C  
ATOM   2497  N1   DT A  79     -28.277  10.250 -27.960  4.00  0.00           N  
ATOM   2498  C2   DT A  79     -28.188  10.663 -29.260  9.00  0.00           C  
ATOM   2499  O2   DT A  79     -28.044  11.779 -29.680  3.00  0.00           O  
ATOM   2500  N3   DT A  79     -28.390   9.696 -30.210  7.00  0.00           N  
ATOM   2501  C4   DT A  79     -28.391   8.354 -29.930  9.00  0.00           C  
ATOM   2502  O4   DT A  79     -28.411   7.600 -30.900  0.00  0.00           O  
ATOM   2503  C5   DT A  79     -28.428   7.919 -28.500  7.00  0.00           C  
ATOM   2504  C6   DT A  79     -28.388   8.913 -27.570  8.00  0.00           C  
ATOM   2505  C7   DT A  79     -28.268   6.479 -28.060  3.00  0.00           C  
ATOM   2506  OP1  DT A  79     -29.148   9.050 -21.270  4.00  0.00           O  
ATOM   2507  OP2  DT A  79     -30.472  10.965 -20.280  0.00  0.00           O1-
ATOM   2508  H3   DT A  79     -28.401   9.894 -31.190  1.00  0.00           H  
ATOM   2509  H6   DT A  79     -28.258   8.711 -26.530  0.00  0.00           H  
ATOM   2510  H1'  DT A  79     -28.275  12.326 -27.590  2.00  0.00           H  
ATOM   2511  H2'  DT A  79     -30.164  10.446 -26.280  9.00  0.00           H  
ATOM   2512  H3'  DT A  79     -30.681  12.171 -24.630  2.00  0.00           H  
ATOM   2513  H4'  DT A  79     -27.925  12.793 -24.340  9.00  0.00           H  
ATOM   2514  H5'  DT A  79     -29.010   9.994 -23.910  2.00  0.00           H  
ATOM   2515  H71  DT A  79     -28.948   5.849 -28.520  3.00  0.00           H  
ATOM   2516  H72  DT A  79     -27.293   6.174 -28.410  2.00  0.00           H  
ATOM   2517  H73  DT A  79     -28.399   6.329 -26.960  8.00  0.00           H  
ATOM   2518 H2''  DT A  79     -30.522  11.766 -27.340  6.00  0.00           H  
ATOM   2519 H5''  DT A  79     -27.471  10.635 -23.170  1.00  0.00           H  
ATOM   2520  P    DA A  80     -31.113  14.524 -25.970  2.00  0.00           P  
ATOM   2521  C5'  DA A  80     -30.786  14.442 -28.570  3.00  0.00           C  
ATOM   2522  O5'  DA A  80     -31.605  14.109 -27.460  7.00  0.00           O  
ATOM   2523  C4'  DA A  80     -31.446  14.108 -29.930  1.00  0.00           C  
ATOM   2524  O4'  DA A  80     -31.277  12.733 -30.300  1.00  0.00           O  
ATOM   2525  C3'  DA A  80     -32.943  14.444 -30.000  5.00  0.00           C  
ATOM   2526  O3'  DA A  80     -33.335  15.007 -31.220  2.00  0.00           O  
ATOM   2527  C2'  DA A  80     -33.501  13.121 -29.740  0.00  0.00           C  
ATOM   2528  C1'  DA A  80     -32.505  12.090 -30.380  6.00  0.00           C  
ATOM   2529  N1   DA A  80     -31.629   7.116 -31.380  8.00  0.00           N  
ATOM   2530  C2   DA A  80     -31.945   8.190 -32.170  1.00  0.00           C  
ATOM   2531  N3   DA A  80     -32.231   9.407 -31.810  4.00  0.00           N  
ATOM   2532  C4   DA A  80     -32.246   9.532 -30.440  3.00  0.00           C  
ATOM   2533  C5   DA A  80     -32.055   8.564 -29.500  1.00  0.00           C  
ATOM   2534  C6   DA A  80     -31.720   7.318 -30.100  8.00  0.00           C  
ATOM   2535  N6   DA A  80     -31.313   6.265 -29.410  3.00  0.00           N  
ATOM   2536  N7   DA A  80     -32.195   9.123 -28.220  8.00  0.00           N  
ATOM   2537  C8   DA A  80     -32.481  10.378 -28.380  3.00  0.00           C  
ATOM   2538  N9   DA A  80     -32.341  10.729 -29.720  1.00  0.00           N  
ATOM   2539  OP1  DA A  80     -30.892  15.916 -26.000  3.00  0.00           O  
ATOM   2540  OP2  DA A  80     -32.128  13.925 -25.030  9.00  0.00           O1-
ATOM   2541  H2   DA A  80     -31.985   7.989 -33.200  0.00  0.00           H  
ATOM   2542  H8   DA A  80     -32.837  11.068 -27.610  5.00  0.00           H  
ATOM   2543  H1'  DA A  80     -32.826  11.969 -31.400  7.00  0.00           H  
ATOM   2544  H2'  DA A  80     -33.562  12.978 -28.670  3.00  0.00           H  
ATOM   2545  H3'  DA A  80     -33.337  15.076 -29.180  8.00  0.00           H  
ATOM   2546  H4'  DA A  80     -30.899  14.755 -30.590  6.00  0.00           H  
ATOM   2547  H5'  DA A  80     -29.865  13.978 -28.480  0.00  0.00           H  
ATOM   2548  H61  DA A  80     -31.164   5.385 -29.890  0.00  0.00           H  
ATOM   2549  H62  DA A  80     -31.362   6.300 -28.410  0.00  0.00           H  
ATOM   2550 H2''  DA A  80     -34.484  12.911 -30.240  3.00  0.00           H  
ATOM   2551 H5''  DA A  80     -30.548  15.491 -28.610  7.00  0.00           H  
ATOM   2552  P    DA A  81     -34.873  15.629 -31.480  3.00  0.00           P  
ATOM   2553  C5'  DA A  81     -35.231  13.632 -33.050  7.00  0.00           C  
ATOM   2554  O5'  DA A  81     -35.612  14.326 -31.880  9.00  0.00           O  
ATOM   2555  C4'  DA A  81     -35.997  12.259 -33.190  9.00  0.00           C  
ATOM   2556  O4'  DA A  81     -35.684  11.411 -32.170  3.00  0.00           O  
ATOM   2557  C3'  DA A  81     -37.482  12.475 -33.250  8.00  0.00           C  
ATOM   2558  O3'  DA A  81     -37.959  11.884 -34.490  9.00  0.00           O  
ATOM   2559  C2'  DA A  81     -38.050  11.941 -31.880  8.00  0.00           C  
ATOM   2560  C1'  DA A  81     -36.949  10.912 -31.690  4.00  0.00           C  
ATOM   2561  N1   DA A  81     -35.335   6.525 -29.600  8.00  0.00           N  
ATOM   2562  C2   DA A  81     -35.679   6.869 -30.780  7.00  0.00           C  
ATOM   2563  N3   DA A  81     -36.208   7.986 -31.230  5.00  0.00           N  
ATOM   2564  C4   DA A  81     -36.151   8.934 -30.230  8.00  0.00           C  
ATOM   2565  C5   DA A  81     -35.716   8.770 -28.930  6.00  0.00           C  
ATOM   2566  C6   DA A  81     -35.260   7.482 -28.690  6.00  0.00           C  
ATOM   2567  N6   DA A  81     -34.656   7.069 -27.620  3.00  0.00           N  
ATOM   2568  N7   DA A  81     -35.878   9.937 -28.190  9.00  0.00           N  
ATOM   2569  C8   DA A  81     -36.364  10.791 -29.110  1.00  0.00           C  
ATOM   2570  N9   DA A  81     -36.611  10.255 -30.360  5.00  0.00           N  
ATOM   2571  OP1  DA A  81     -34.962  16.610 -32.630  7.00  0.00           O  
ATOM   2572  OP2  DA A  81     -35.435  16.027 -30.180  5.00  0.00           O1-
ATOM   2573  H2   DA A  81     -35.543   6.008 -31.460  1.00  0.00           H  
ATOM   2574  H8   DA A  81     -36.638  11.832 -28.880  0.00  0.00           H  
ATOM   2575  H1'  DA A  81     -37.147  10.087 -32.310  4.00  0.00           H  
ATOM   2576  H2'  DA A  81     -38.051  12.690 -31.080  3.00  0.00           H  
ATOM   2577  H3'  DA A  81     -37.684  13.597 -33.210  3.00  0.00           H  
ATOM   2578  H4'  DA A  81     -35.615  11.773 -34.090  3.00  0.00           H  
ATOM   2579  H5'  DA A  81     -34.098  13.481 -33.040  7.00  0.00           H  
ATOM   2580  H61  DA A  81     -34.482   6.131 -27.490  4.00  0.00           H  
ATOM   2581  H62  DA A  81     -34.379   7.710 -26.950  8.00  0.00           H  
ATOM   2582 H2''  DA A  81     -38.954  11.474 -31.960  8.00  0.00           H  
ATOM   2583 H5''  DA A  81     -35.433  14.253 -33.850  9.00  0.00           H  
ATOM   2584  P    DC A  82     -39.400  11.781 -34.940  4.00  0.00           P  
ATOM   2585  C5'  DC A  82     -39.593   9.265 -34.510  9.00  0.00           C  
ATOM   2586  O5'  DC A  82     -39.931  10.589 -34.100  4.00  0.00           O  
ATOM   2587  C4'  DC A  82     -40.104   8.183 -33.640  6.00  0.00           C  
ATOM   2588  O4'  DC A  82     -39.336   8.011 -32.450  1.00  0.00           O  
ATOM   2589  C3'  DC A  82     -41.585   8.375 -33.320  0.00  0.00           C  
ATOM   2590  O3'  DC A  82     -42.226   7.160 -33.610  0.00  0.00           O  
ATOM   2591  C2'  DC A  82     -41.519   8.668 -31.840  7.00  0.00           C  
ATOM   2592  C1'  DC A  82     -40.309   7.832 -31.370  4.00  0.00           C  
ATOM   2593  N1   DC A  82     -39.766   7.988 -30.010  6.00  0.00           N  
ATOM   2594  C2   DC A  82     -39.144   6.863 -29.460  1.00  0.00           C  
ATOM   2595  O2   DC A  82     -39.161   5.793 -30.030  9.00  0.00           O  
ATOM   2596  N3   DC A  82     -38.461   6.970 -28.270  4.00  0.00           N  
ATOM   2597  C4   DC A  82     -38.509   8.072 -27.590  9.00  0.00           C  
ATOM   2598  N4   DC A  82     -37.793   8.078 -26.500  3.00  0.00           N  
ATOM   2599  C5   DC A  82     -39.077   9.264 -28.070  4.00  0.00           C  
ATOM   2600  C6   DC A  82     -39.724   9.147 -29.280  4.00  0.00           C  
ATOM   2601  OP1  DC A  82     -39.454  11.304 -36.350  7.00  0.00           O  
ATOM   2602  OP2  DC A  82     -40.087  12.979 -34.450  1.00  0.00           O1-
ATOM   2603  H5   DC A  82     -39.152  10.153 -27.450  4.00  0.00           H  
ATOM   2604  H6   DC A  82     -40.207   9.993 -29.680  6.00  0.00           H  
ATOM   2605  H1'  DC A  82     -40.569   6.743 -31.460  0.00  0.00           H  
ATOM   2606  H2'  DC A  82     -41.310   9.716 -31.690  3.00  0.00           H  
ATOM   2607  H3'  DC A  82     -41.916   9.129 -34.040  8.00  0.00           H  
ATOM   2608  H4'  DC A  82     -39.999   7.314 -34.300  0.00  0.00           H  
ATOM   2609  H41  DC A  82     -37.381   7.219 -26.250  5.00  0.00           H  
ATOM   2610  H5'  DC A  82     -38.479   9.166 -34.560  9.00  0.00           H  
ATOM   2611  H42  DC A  82     -37.731   8.966 -25.980  9.00  0.00           H  
ATOM   2612 H2''  DC A  82     -42.439   8.301 -31.320  5.00  0.00           H  
ATOM   2613 H5''  DC A  82     -40.062   9.127 -35.480  2.00  0.00           H  
ATOM   2614  P    DC A  83     -43.787   7.102 -33.970  7.00  0.00           P  
ATOM   2615  C5'  DC A  83     -45.144   6.000 -32.010  3.00  0.00           C  
ATOM   2616  O5'  DC A  83     -44.513   7.147 -32.550  6.00  0.00           O  
ATOM   2617  C4'  DC A  83     -44.089   5.062 -31.410  5.00  0.00           C  
ATOM   2618  O4'  DC A  83     -43.098   5.752 -30.670  4.00  0.00           O  
ATOM   2619  C3'  DC A  83     -44.758   4.039 -30.480  0.00  0.00           C  
ATOM   2620  O3'  DC A  83     -44.531   2.656 -30.950  3.00  0.00           O  
ATOM   2621  C2'  DC A  83     -44.064   4.275 -29.130  2.00  0.00           C  
ATOM   2622  C1'  DC A  83     -42.813   5.082 -29.440  5.00  0.00           C  
ATOM   2623  N1   DC A  83     -42.421   6.021 -28.400  3.00  0.00           N  
ATOM   2624  C2   DC A  83     -41.811   5.517 -27.260  8.00  0.00           C  
ATOM   2625  O2   DC A  83     -41.486   4.319 -27.260  5.00  0.00           O  
ATOM   2626  N3   DC A  83     -41.471   6.300 -26.270  3.00  0.00           N  
ATOM   2627  C4   DC A  83     -41.806   7.556 -26.320  9.00  0.00           C  
ATOM   2628  N4   DC A  83     -41.634   8.319 -25.240  5.00  0.00           N  
ATOM   2629  C5   DC A  83     -42.638   8.124 -27.300  5.00  0.00           C  
ATOM   2630  C6   DC A  83     -42.969   7.321 -28.370  4.00  0.00           C  
ATOM   2631  OP1  DC A  83     -44.083   5.789 -34.550  7.00  0.00           O  
ATOM   2632  OP2  DC A  83     -44.178   8.311 -34.800  9.00  0.00           O1-
ATOM   2633  H5   DC A  83     -43.070   9.095 -27.120  6.00  0.00           H  
ATOM   2634  H6   DC A  83     -43.763   7.628 -29.040  9.00  0.00           H  
ATOM   2635  H1'  DC A  83     -41.998   4.407 -29.620  5.00  0.00           H  
ATOM   2636  H2'  DC A  83     -44.809   4.746 -28.480  0.00  0.00           H  
ATOM   2637  H3'  DC A  83     -45.765   4.295 -30.290  1.00  0.00           H  
ATOM   2638  H4'  DC A  83     -43.605   4.471 -32.230  8.00  0.00           H  
ATOM   2639  H41  DC A  83     -41.111   7.969 -24.420  6.00  0.00           H  
ATOM   2640  H5'  DC A  83     -45.742   5.368 -32.690  2.00  0.00           H  
ATOM   2641  H42  DC A  83     -41.939   9.265 -25.150  4.00  0.00           H  
ATOM   2642 H2''  DC A  83     -43.937   3.319 -28.630  5.00  0.00           H  
ATOM   2643 H5''  DC A  83     -45.645   6.320 -31.150  4.00  0.00           H  
ATOM   2644  P    DC A  84     -45.494   1.414 -30.790  8.00  0.00           P  
ATOM   2645  C5'  DC A  84     -44.394  -0.006 -28.760  8.00  0.00           C  
ATOM   2646  O5'  DC A  84     -45.332   0.953 -29.270  0.00  0.00           O  
ATOM   2647  C4'  DC A  84     -44.477  -0.035 -27.250  7.00  0.00           C  
ATOM   2648  O4'  DC A  84     -43.955   1.207 -26.680  3.00  0.00           O  
ATOM   2649  C3'  DC A  84     -45.898  -0.139 -26.680  7.00  0.00           C  
ATOM   2650  O3'  DC A  84     -46.113  -1.368 -25.980  0.00  0.00           O  
ATOM   2651  C2'  DC A  84     -45.942   0.935 -25.580  7.00  0.00           C  
ATOM   2652  C1'  DC A  84     -44.494   1.310 -25.400  7.00  0.00           C  
ATOM   2653  N1   DC A  84     -44.337   2.654 -24.860  9.00  0.00           N  
ATOM   2654  C2   DC A  84     -43.758   2.917 -23.620  1.00  0.00           C  
ATOM   2655  O2   DC A  84     -43.496   2.059 -22.780  4.00  0.00           O  
ATOM   2656  N3   DC A  84     -43.593   4.183 -23.200  1.00  0.00           N  
ATOM   2657  C4   DC A  84     -43.928   5.242 -23.880  9.00  0.00           C  
ATOM   2658  N4   DC A  84     -43.778   6.414 -23.350  1.00  0.00           N  
ATOM   2659  C5   DC A  84     -44.490   5.089 -25.190  0.00  0.00           C  
ATOM   2660  C6   DC A  84     -44.637   3.769 -25.640  6.00  0.00           C  
ATOM   2661  OP1  DC A  84     -44.961   0.291 -31.670  9.00  0.00           O  
ATOM   2662  OP2  DC A  84     -46.869   1.809 -31.000  4.00  0.00           O1-
ATOM   2663  H5   DC A  84     -44.771   5.864 -25.780  4.00  0.00           H  
ATOM   2664  H6   DC A  84     -45.214   3.613 -26.560  8.00  0.00           H  
ATOM   2665  H1'  DC A  84     -43.948   0.588 -24.820  6.00  0.00           H  
ATOM   2666  H2'  DC A  84     -46.451   1.858 -25.820  6.00  0.00           H  
ATOM   2667  H3'  DC A  84     -46.715   0.122 -27.410  5.00  0.00           H  
ATOM   2668  H4'  DC A  84     -43.797  -0.823 -26.840  4.00  0.00           H  
ATOM   2669  H41  DC A  84     -43.287   6.560 -22.430  5.00  0.00           H  
ATOM   2670  H5'  DC A  84     -43.314   0.216 -29.000  2.00  0.00           H  
ATOM   2671  H42  DC A  84     -43.957   7.252 -23.940  1.00  0.00           H  
ATOM   2672 H2''  DC A  84     -46.387   0.635 -24.690  2.00  0.00           H  
ATOM   2673 H5''  DC A  84     -44.618  -1.024 -29.180  4.00  0.00           H  
ATOM   2674  P    DT A  85     -47.590  -1.842 -25.510  5.00  0.00           P  
ATOM   2675  C5'  DT A  85     -46.639  -2.025 -23.130  6.00  0.00           C  
ATOM   2676  O5'  DT A  85     -47.479  -1.266 -23.980  4.00  0.00           O  
ATOM   2677  C4'  DT A  85     -46.412  -1.524 -21.660  0.00  0.00           C  
ATOM   2678  O4'  DT A  85     -46.010  -0.222 -21.580  6.00  0.00           O  
ATOM   2679  C3'  DT A  85     -47.752  -1.739 -20.930  2.00  0.00           C  
ATOM   2680  O3'  DT A  85     -47.416  -1.974 -19.590  2.00  0.00           O  
ATOM   2681  C2'  DT A  85     -48.367  -0.379 -21.140  4.00  0.00           C  
ATOM   2682  C1'  DT A  85     -47.091   0.502 -20.930  1.00  0.00           C  
ATOM   2683  N1   DT A  85     -47.134   1.897 -21.470  5.00  0.00           N  
ATOM   2684  C2   DT A  85     -46.414   2.901 -20.850  6.00  0.00           C  
ATOM   2685  O2   DT A  85     -45.638   2.712 -19.860  5.00  0.00           O  
ATOM   2686  N3   DT A  85     -46.541   4.135 -21.390  8.00  0.00           N  
ATOM   2687  C4   DT A  85     -47.196   4.517 -22.540  0.00  0.00           C  
ATOM   2688  O4   DT A  85     -47.083   5.695 -22.940  0.00  0.00           O  
ATOM   2689  C5   DT A  85     -47.932   3.445 -23.130  7.00  0.00           C  
ATOM   2690  C6   DT A  85     -47.910   2.213 -22.610  1.00  0.00           C  
ATOM   2691  C7   DT A  85     -48.839   3.728 -24.390  6.00  0.00           C  
ATOM   2692  OP1  DT A  85     -47.743  -3.284 -25.490  2.00  0.00           O  
ATOM   2693  OP2  DT A  85     -48.624  -0.958 -26.170  8.00  0.00           O1-
ATOM   2694  H3   DT A  85     -45.943   4.957 -21.060  4.00  0.00           H  
ATOM   2695  H6   DT A  85     -48.382   1.445 -23.110  8.00  0.00           H  
ATOM   2696  H1'  DT A  85     -46.917   0.533 -19.850  5.00  0.00           H  
ATOM   2697  H2'  DT A  85     -48.671  -0.336 -22.200  9.00  0.00           H  
ATOM   2698  H3'  DT A  85     -48.435  -2.547 -21.350  3.00  0.00           H  
ATOM   2699  H4'  DT A  85     -45.662  -2.098 -21.190  9.00  0.00           H  
ATOM   2700  H5'  DT A  85     -45.657  -1.880 -23.640  1.00  0.00           H  
ATOM   2701  H71  DT A  85     -48.172   4.138 -25.120  9.00  0.00           H  
ATOM   2702  H72  DT A  85     -49.295   2.878 -24.680  9.00  0.00           H  
ATOM   2703  H73  DT A  85     -49.590   4.425 -24.120  1.00  0.00           H  
ATOM   2704 H2''  DT A  85     -49.224  -0.281 -20.460  8.00  0.00           H  
ATOM   2705 H5''  DT A  85     -46.878  -3.088 -23.180  6.00  0.00           H  
ATOM   2706  P    DA A  86     -48.136  -3.046 -18.720  0.00  0.00           P  
ATOM   2707  C5'  DA A  86     -46.635  -3.076 -16.480  6.00  0.00           C  
ATOM   2708  O5'  DA A  86     -47.834  -2.733 -17.180  7.00  0.00           O  
ATOM   2709  C4'  DA A  86     -46.275  -2.323 -15.190  9.00  0.00           C  
ATOM   2710  O4'  DA A  86     -46.081  -1.016 -15.660  7.00  0.00           O  
ATOM   2711  C3'  DA A  86     -47.353  -2.288 -14.150  6.00  0.00           C  
ATOM   2712  O3'  DA A  86     -46.974  -2.021 -12.770  8.00  0.00           O  
ATOM   2713  C2'  DA A  86     -48.179  -1.107 -14.580  6.00  0.00           C  
ATOM   2714  C1'  DA A  86     -47.059  -0.151 -15.100  5.00  0.00           C  
ATOM   2715  N1   DA A  86     -46.914   4.683 -16.630  6.00  0.00           N  
ATOM   2716  C2   DA A  86     -46.423   4.037 -15.600  3.00  0.00           C  
ATOM   2717  N3   DA A  86     -46.542   2.780 -15.260  0.00  0.00           N  
ATOM   2718  C4   DA A  86     -47.268   2.028 -16.160  3.00  0.00           C  
ATOM   2719  C5   DA A  86     -47.770   2.517 -17.330  7.00  0.00           C  
ATOM   2720  C6   DA A  86     -47.490   3.906 -17.560  6.00  0.00           C  
ATOM   2721  N6   DA A  86     -47.958   4.590 -18.600  6.00  0.00           N  
ATOM   2722  N7   DA A  86     -48.427   1.578 -18.080  9.00  0.00           N  
ATOM   2723  C8   DA A  86     -48.331   0.523 -17.320  3.00  0.00           C  
ATOM   2724  N9   DA A  86     -47.510   0.740 -16.190  0.00  0.00           N  
ATOM   2725  OP1  DA A  86     -47.546  -4.359 -19.070  0.00  0.00           O  
ATOM   2726  OP2  DA A  86     -49.615  -2.866 -18.920  7.00  0.00           O1-
ATOM   2727  H2   DA A  86     -45.969   4.605 -14.830  9.00  0.00           H  
ATOM   2728  H8   DA A  86     -48.785  -0.384 -17.610  6.00  0.00           H  
ATOM   2729  H1'  DA A  86     -46.589   0.404 -14.310  6.00  0.00           H  
ATOM   2730  H2'  DA A  86     -48.835  -1.383 -15.320  3.00  0.00           H  
ATOM   2731  H3'  DA A  86     -47.896  -3.288 -14.250  8.00  0.00           H  
ATOM   2732  H4'  DA A  86     -45.319  -2.721 -14.750  2.00  0.00           H  
ATOM   2733  H5'  DA A  86     -45.761  -3.157 -17.170  5.00  0.00           H  
ATOM   2734  H61  DA A  86     -47.836   5.604 -18.610  7.00  0.00           H  
ATOM   2735  H62  DA A  86     -48.559   4.086 -19.250  6.00  0.00           H  
ATOM   2736 H2''  DA A  86     -48.763  -0.708 -13.750  0.00  0.00           H  
ATOM   2737 H5''  DA A  86     -46.693  -4.111 -16.160  5.00  0.00           H  
ATOM   2738  P    DA A  87     -47.829  -2.514 -11.490  9.00  0.00           P  
ATOM   2739  C5'  DA A  87     -47.852  -0.246 -10.110  8.00  0.00           C  
ATOM   2740  O5'  DA A  87     -48.525  -1.197 -10.920  3.00  0.00           O  
ATOM   2741  C4'  DA A  87     -48.542   1.098  -9.870  8.00  0.00           C  
ATOM   2742  O4'  DA A  87     -48.725   1.839 -11.090  4.00  0.00           O  
ATOM   2743  C3'  DA A  87     -49.850   1.011  -9.150  4.00  0.00           C  
ATOM   2744  O3'  DA A  87     -49.740   1.807  -7.950  4.00  0.00           O  
ATOM   2745  C2'  DA A  87     -50.815   1.567 -10.260  9.00  0.00           C  
ATOM   2746  C1'  DA A  87     -49.976   2.496 -11.130  6.00  0.00           C  
ATOM   2747  N1   DA A  87     -49.914   5.680 -15.050  3.00  0.00           N  
ATOM   2748  C2   DA A  87     -49.438   5.856 -13.850  2.00  0.00           C  
ATOM   2749  N3   DA A  87     -49.479   4.945 -12.920  2.00  0.00           N  
ATOM   2750  C4   DA A  87     -50.118   3.798 -13.280  0.00  0.00           C  
ATOM   2751  C5   DA A  87     -50.616   3.499 -14.470  1.00  0.00           C  
ATOM   2752  C6   DA A  87     -50.472   4.526 -15.380  7.00  0.00           C  
ATOM   2753  N6   DA A  87     -50.675   4.318 -16.640  2.00  0.00           N  
ATOM   2754  N7   DA A  87     -51.095   2.113 -14.500  2.00  0.00           N  
ATOM   2755  C8   DA A  87     -51.050   1.785 -13.270  8.00  0.00           C  
ATOM   2756  N9   DA A  87     -50.378   2.727 -12.470  6.00  0.00           N  
ATOM   2757  OP1  DA A  87     -46.801  -2.926 -10.520  8.00  0.00           O  
ATOM   2758  OP2  DA A  87     -48.910  -3.508 -11.760  0.00  0.00           O1-
ATOM   2759  H2   DA A  87     -48.981   6.833 -13.580  7.00  0.00           H  
ATOM   2760  H8   DA A  87     -51.434   0.830 -12.890  7.00  0.00           H  
ATOM   2761  H1'  DA A  87     -49.876   3.516 -10.760  7.00  0.00           H  
ATOM   2762  H2'  DA A  87     -51.189   0.780 -10.920  8.00  0.00           H  
ATOM   2763  H3'  DA A  87     -50.059  -0.064  -8.970  7.00  0.00           H  
ATOM   2764  H4'  DA A  87     -47.842   1.672  -9.240  4.00  0.00           H  
ATOM   2765  H5'  DA A  87     -46.860  -0.071 -10.510  1.00  0.00           H  
ATOM   2766  H61  DA A  87     -50.670   5.142 -17.230  7.00  0.00           H  
ATOM   2767  H62  DA A  87     -50.976   3.438 -17.000  3.00  0.00           H  
ATOM   2768 H2''  DA A  87     -51.682   2.169  -9.860  6.00  0.00           H  
ATOM   2769 H5''  DA A  87     -47.666  -0.608  -9.090  0.00  0.00           H  
ATOM   2770  P    DC A  88     -51.031   2.206  -7.020  3.00  0.00           P  
ATOM   2771  C5'  DC A  88     -50.693   4.790  -7.360  3.00  0.00           C  
ATOM   2772  O5'  DC A  88     -51.448   3.654  -7.650  1.00  0.00           O  
ATOM   2773  C4'  DC A  88     -51.171   6.046  -8.080  7.00  0.00           C  
ATOM   2774  O4'  DC A  88     -51.192   5.914  -9.510  5.00  0.00           O  
ATOM   2775  C3'  DC A  88     -52.616   6.387  -7.650  9.00  0.00           C  
ATOM   2776  O3'  DC A  88     -52.677   7.822  -7.350  8.00  0.00           O  
ATOM   2777  C2'  DC A  88     -53.346   6.114  -8.930  1.00  0.00           C  
ATOM   2778  C1'  DC A  88     -52.385   6.420 -10.070  4.00  0.00           C  
ATOM   2779  N1   DC A  88     -52.816   5.715 -11.320  3.00  0.00           N  
ATOM   2780  C2   DC A  88     -52.983   6.410 -12.490  3.00  0.00           C  
ATOM   2781  O2   DC A  88     -52.765   7.652 -12.370  2.00  0.00           O  
ATOM   2782  N3   DC A  88     -53.482   5.870 -13.630  9.00  0.00           N  
ATOM   2783  C4   DC A  88     -53.837   4.631 -13.670  7.00  0.00           C  
ATOM   2784  N4   DC A  88     -54.098   4.185 -14.810  9.00  0.00           N  
ATOM   2785  C5   DC A  88     -53.548   3.807 -12.500  8.00  0.00           C  
ATOM   2786  C6   DC A  88     -53.110   4.391 -11.380  9.00  0.00           C  
ATOM   2787  OP1  DC A  88     -50.518   2.345  -5.650  2.00  0.00           O  
ATOM   2788  OP2  DC A  88     -52.165   1.314  -7.290  6.00  0.00           O1-
ATOM   2789  H5   DC A  88     -53.867   2.808 -12.420  3.00  0.00           H  
ATOM   2790  H6   DC A  88     -52.926   3.761 -10.530  1.00  0.00           H  
ATOM   2791  H1'  DC A  88     -52.319   7.460 -10.170  7.00  0.00           H  
ATOM   2792  H2'  DC A  88     -53.524   5.072  -8.930  3.00  0.00           H  
ATOM   2793  H3'  DC A  88     -53.000   5.745  -6.890  0.00  0.00           H  
ATOM   2794  H4'  DC A  88     -50.508   6.899  -7.880  7.00  0.00           H  
ATOM   2795  H41  DC A  88     -53.972   4.915 -15.480  9.00  0.00           H  
ATOM   2796  H5'  DC A  88     -49.659   4.524  -7.620  3.00  0.00           H  
ATOM   2797  H42  DC A  88     -54.263   3.222 -14.980  4.00  0.00           H  
ATOM   2798 H2''  DC A  88     -54.292   6.638  -9.170  2.00  0.00           H  
ATOM   2799 H5''  DC A  88     -50.798   4.986  -6.280  1.00  0.00           H  
ATOM   2800  P    DC A  89     -54.011   8.516  -6.780  5.00  0.00           P  
ATOM   2801  C5'  DC A  89     -53.899  10.316  -8.560  8.00  0.00           C  
ATOM   2802  O5'  DC A  89     -54.656   9.285  -8.000  2.00  0.00           O  
ATOM   2803  C4'  DC A  89     -54.556  11.091  -9.670  3.00  0.00           C  
ATOM   2804  O4'  DC A  89     -54.571  10.405 -10.880  7.00  0.00           O  
ATOM   2805  C3'  DC A  89     -55.941  11.636  -9.300  0.00  0.00           C  
ATOM   2806  O3'  DC A  89     -55.975  13.036  -9.580  1.00  0.00           O  
ATOM   2807  C2'  DC A  89     -56.764  10.731 -10.170  8.00  0.00           C  
ATOM   2808  C1'  DC A  89     -55.873  10.488 -11.390  9.00  0.00           C  
ATOM   2809  N1   DC A  89     -56.262   9.163 -11.910  1.00  0.00           N  
ATOM   2810  C2   DC A  89     -56.813   9.046 -13.240  2.00  0.00           C  
ATOM   2811  O2   DC A  89     -57.014   9.990 -14.010  4.00  0.00           O  
ATOM   2812  N3   DC A  89     -57.023   7.819 -13.700  8.00  0.00           N  
ATOM   2813  C4   DC A  89     -56.856   6.748 -12.960  4.00  0.00           C  
ATOM   2814  N4   DC A  89     -57.096   5.645 -13.620  5.00  0.00           N  
ATOM   2815  C5   DC A  89     -56.399   6.821 -11.620  2.00  0.00           C  
ATOM   2816  C6   DC A  89     -56.099   8.035 -11.140  6.00  0.00           C  
ATOM   2817  OP1  DC A  89     -53.749   9.515  -5.720  1.00  0.00           O  
ATOM   2818  OP2  DC A  89     -54.938   7.442  -6.420  5.00  0.00           O1-
ATOM   2819  H5   DC A  89     -56.200   5.934 -10.980  9.00  0.00           H  
ATOM   2820  H6   DC A  89     -55.579   8.225 -10.190  6.00  0.00           H  
ATOM   2821  H1'  DC A  89     -55.979  11.293 -12.100  8.00  0.00           H  
ATOM   2822  H2'  DC A  89     -57.036   9.854  -9.540  8.00  0.00           H  
ATOM   2823  H3'  DC A  89     -56.170  11.411  -8.280  4.00  0.00           H  
ATOM   2824  H4'  DC A  89     -53.877  11.952  -9.780  2.00  0.00           H  
ATOM   2825  H41  DC A  89     -57.389   5.792 -14.590  8.00  0.00           H  
ATOM   2826  H5'  DC A  89     -52.984   9.835  -8.850  4.00  0.00           H  
ATOM   2827  H42  DC A  89     -57.094   4.715 -13.140  6.00  0.00           H  
ATOM   2828 H2''  DC A  89     -57.574  11.283 -10.500  8.00  0.00           H  
ATOM   2829 H5''  DC A  89     -53.684  11.116  -7.830  2.00  0.00           H  
ATOM   2830  P   DC3 A  90     -57.293  13.937  -9.420  6.00  0.00           P  
ATOM   2831  C5' DC3 A  90     -57.867  14.294 -11.930  2.00  0.00           C  
ATOM   2832  O5' DC3 A  90     -58.251  13.776 -10.710  1.00  0.00           O  
ATOM   2833  C4' DC3 A  90     -58.777  13.695 -13.040  7.00  0.00           C  
ATOM   2834  O4' DC3 A  90     -58.718  12.309 -13.150  2.00  0.00           O  
ATOM   2835  C3' DC3 A  90     -60.238  14.166 -12.810  2.00  0.00           C  
ATOM   2836  O3' DC3 A  90     -60.605  15.182 -13.720  0.00  0.00           O  
ATOM   2837  C2' DC3 A  90     -60.972  12.851 -13.110  3.00  0.00           C  
ATOM   2838  C1' DC3 A  90     -59.959  11.934 -13.740  3.00  0.00           C  
ATOM   2839  N1  DC3 A  90     -60.301  10.453 -13.580  3.00  0.00           N  
ATOM   2840  C2  DC3 A  90     -60.875   9.823 -14.670  8.00  0.00           C  
ATOM   2841  O2  DC3 A  90     -61.281  10.476 -15.640  7.00  0.00           O  
ATOM   2842  N3  DC3 A  90     -60.832   8.493 -14.710  8.00  0.00           N  
ATOM   2843  C4  DC3 A  90     -60.490   7.816 -13.710  3.00  0.00           C  
ATOM   2844  N4  DC3 A  90     -60.589   6.535 -13.770  1.00  0.00           N  
ATOM   2845  C5  DC3 A  90     -60.142   8.432 -12.430  3.00  0.00           C  
ATOM   2846  C6  DC3 A  90     -60.067   9.774 -12.440  3.00  0.00           C  
ATOM   2847  OP1 DC3 A  90     -56.771  15.315  -9.470  1.00  0.00           O  
ATOM   2848  OP2 DC3 A  90     -58.046  13.513  -8.200  1.00  0.00           O  
ATOM   2849 HO3' DC3 A  90     -61.281  15.680 -13.290  4.00  0.00           H  
ATOM   2850  H5  DC3 A  90     -59.821   7.920 -11.560  4.00  0.00           H  
ATOM   2851  H6  DC3 A  90     -59.846  10.323 -11.540  8.00  0.00           H  
ATOM   2852  H1' DC3 A  90     -59.932  12.215 -14.790  2.00  0.00           H  
ATOM   2853  H2' DC3 A  90     -61.331  12.377 -12.200  2.00  0.00           H  
ATOM   2854  H3' DC3 A  90     -60.374  14.435 -11.720  4.00  0.00           H  
ATOM   2855  H4' DC3 A  90     -58.338  14.070 -13.930  3.00  0.00           H  
ATOM   2856  H41 DC3 A  90     -60.733   6.078 -14.630  9.00  0.00           H  
ATOM   2857  H5' DC3 A  90     -56.714  14.104 -12.080  6.00  0.00           H  
ATOM   2858  H42 DC3 A  90     -60.470   5.970 -12.910  6.00  0.00           H  
ATOM   2859 H2'' DC3 A  90     -61.785  12.915 -13.840  9.00  0.00           H  
ATOM   2860 H5'' DC3 A  90     -58.011  15.389 -11.860  9.00  0.00           H  
ATOM   2861  C   CNT A 208      -5.892 -13.712 -29.870  4.00  0.00           C  
ATOM   2862  C   CNT A 208      -6.610 -13.511 -28.610  7.00  0.00           C  
ATOM   2863  C   CNT A 208      -6.734 -12.084 -28.260  6.00  0.00           C  
ATOM   2864  C   CNT A 208      -7.065 -11.814 -26.900  3.00  0.00           C  
ATOM   2865  C   CNT A 208      -7.071 -14.456 -27.620  5.00  0.00           C  
ATOM   2866  C   CNT A 208      -6.717 -14.189 -26.230  3.00  0.00           C  
ATOM   2867  C   CNT A 208      -6.748 -12.754 -25.900  1.00  0.00           C  
ATOM   2868  C   CNT A 208      -6.092 -12.264 -24.740  5.00  0.00           C  
ATOM   2869  C   CNT A 208      -5.805 -14.874 -25.380  5.00  0.00           C  
ATOM   2870  C   CNT A 208      -4.821 -14.337 -24.470  9.00  0.00           C  
ATOM   2871  C   CNT A 208      -5.010 -12.931 -24.240  3.00  0.00           C  
ATOM   2872  C   CNT A 208      -4.041 -12.156 -23.520  0.00  0.00           C  
ATOM   2873  C   CNT A 208      -3.624 -14.870 -24.020  4.00  0.00           C  
ATOM   2874  C   CNT A 208      -2.499 -14.066 -23.810  4.00  0.00           C  
ATOM   2875  C   CNT A 208      -2.746 -12.691 -23.460  2.00  0.00           C  
ATOM   2876  C   CNT A 208      -1.627 -11.739 -23.480  9.00  0.00           C  
ATOM   2877  C   CNT A 208      -1.180 -14.344 -24.120  0.00  0.00           C  
ATOM   2878  C   CNT A 208      -0.244 -13.465 -24.650  2.00  0.00           C  
ATOM   2879  C   CNT A 208      -0.494 -12.075 -24.290  5.00  0.00           C  
ATOM   2880  C   CNT A 208       0.116 -11.029 -25.000  7.00  0.00           C  
ATOM   2881  C   CNT A 208       0.854 -13.536 -25.530  7.00  0.00           C  
ATOM   2882  C   CNT A 208       1.086 -12.650 -26.580  2.00  0.00           C  
ATOM   2883  C   CNT A 208       0.776 -11.306 -26.220  5.00  0.00           C  
ATOM   2884  C   CNT A 208       0.856 -10.229 -27.190  6.00  0.00           C  
ATOM   2885  C   CNT A 208       1.527 -12.799 -27.950  8.00  0.00           C  
ATOM   2886  C   CNT A 208       1.183 -11.911 -28.980  5.00  0.00           C  
ATOM   2887  C   CNT A 208       0.805 -10.613 -28.540  4.00  0.00           C  
ATOM   2888  C   CNT A 208       0.053  -9.826 -29.430  1.00  0.00           C  
ATOM   2889  C   CNT A 208       0.936 -12.250 -30.370  3.00  0.00           C  
ATOM   2890  C   CNT A 208      -0.339 -11.764 -30.860  5.00  0.00           C  
ATOM   2891  C   CNT A 208      -0.722 -10.389 -30.430  1.00  0.00           C  
ATOM   2892  C   CNT A 208      -1.986  -9.908 -30.630  0.00  0.00           C  
ATOM   2893  C   CNT A 208      -1.483 -12.390 -31.420  6.00  0.00           C  
ATOM   2894  C   CNT A 208      -2.846 -12.117 -31.330  7.00  0.00           C  
ATOM   2895  C   CNT A 208      -3.092 -10.740 -30.930  9.00  0.00           C  
ATOM   2896  C   CNT A 208      -4.376 -10.453 -30.450  1.00  0.00           C  
ATOM   2897  C   CNT A 208      -4.030 -12.875 -31.390  6.00  0.00           C  
ATOM   2898  C   CNT A 208      -5.048 -12.769 -30.390  5.00  0.00           C  
ATOM   2899  C   CNT A 208      -5.295 -11.412 -30.030  7.00  0.00           C  
ATOM   2900  C   CNT A 208      -6.280 -11.085 -29.140  3.00  0.00           C  
ATOM   2901  C   CNT A 208      -6.500  -9.723 -28.790  8.00  0.00           C  
ATOM   2902  C   CNT A 208      -7.100  -9.482 -27.580  1.00  0.00           C  
ATOM   2903  C   CNT A 208      -7.255  -8.149 -27.290  2.00  0.00           C  
ATOM   2904  C   CNT A 208      -7.585  -7.827 -25.940  3.00  0.00           C  
ATOM   2905  C   CNT A 208      -7.274 -10.450 -26.570  4.00  0.00           C  
ATOM   2906  C   CNT A 208      -7.099 -10.109 -25.250  0.00  0.00           C  
ATOM   2907  C   CNT A 208      -7.320  -8.759 -24.860  2.00  0.00           C  
ATOM   2908  C   CNT A 208      -6.784  -8.228 -23.720  7.00  0.00           C  
ATOM   2909  C   CNT A 208      -6.315 -10.914 -24.390  2.00  0.00           C  
ATOM   2910  C   CNT A 208      -5.512 -10.245 -23.440  0.00  0.00           C  
ATOM   2911  C   CNT A 208      -5.686  -8.915 -23.130  1.00  0.00           C  
ATOM   2912  C   CNT A 208      -4.715  -8.137 -22.470  1.00  0.00           C  
ATOM   2913  C   CNT A 208      -4.238 -10.800 -23.220  5.00  0.00           C  
ATOM   2914  C   CNT A 208      -3.187  -9.934 -22.950  0.00  0.00           C  
ATOM   2915  C   CNT A 208      -3.375  -8.600 -22.470  6.00  0.00           C  
ATOM   2916  C   CNT A 208      -2.295  -7.668 -22.460  6.00  0.00           C  
ATOM   2917  C   CNT A 208      -1.873 -10.385 -23.300  2.00  0.00           C  
ATOM   2918  C   CNT A 208      -0.911  -9.386 -23.560  1.00  0.00           C  
ATOM   2919  C   CNT A 208      -1.104  -8.063 -23.130  6.00  0.00           C  
ATOM   2920  C   CNT A 208      -0.383  -7.038 -23.800  2.00  0.00           C  
ATOM   2921  C   CNT A 208      -0.002  -9.697 -24.590  7.00  0.00           C  
ATOM   2922  C   CNT A 208       0.282  -8.630 -25.490  5.00  0.00           C  
ATOM   2923  C   CNT A 208       0.108  -7.307 -25.080  0.00  0.00           C  
ATOM   2924  C   CNT A 208       0.129  -6.354 -26.060  6.00  0.00           C  
ATOM   2925  C   CNT A 208       0.532  -8.966 -26.820  2.00  0.00           C  
ATOM   2926  C   CNT A 208       0.238  -8.051 -27.830  1.00  0.00           C  
ATOM   2927  C   CNT A 208       0.008  -6.737 -27.420  1.00  0.00           C  
ATOM   2928  C   CNT A 208      -0.785  -5.888 -28.290  0.00  0.00           C  
ATOM   2929  C   CNT A 208      -0.198  -8.505 -29.050  8.00  0.00           C  
ATOM   2930  C   CNT A 208      -1.319  -7.821 -29.620  5.00  0.00           C  
ATOM   2931  C   CNT A 208      -1.665  -6.528 -29.230  5.00  0.00           C  
ATOM   2932  C   CNT A 208      -2.915  -5.969 -29.550  8.00  0.00           C  
ATOM   2933  C   CNT A 208      -2.262  -8.555 -30.270  9.00  0.00           C  
ATOM   2934  C   CNT A 208      -3.575  -8.149 -30.200  5.00  0.00           C  
ATOM   2935  C   CNT A 208      -3.960  -6.793 -29.920  8.00  0.00           C  
ATOM   2936  C   CNT A 208      -5.270  -6.366 -29.620  5.00  0.00           C  
ATOM   2937  C   CNT A 208      -4.635  -9.076 -30.210  5.00  0.00           C  
ATOM   2938  C   CNT A 208      -5.780  -8.720 -29.470  3.00  0.00           C  
ATOM   2939  C   CNT A 208      -6.187  -7.390 -29.250  3.00  0.00           C  
ATOM   2940  C   CNT A 208      -7.067  -7.117 -28.160  5.00  0.00           C  
ATOM   2941  C   CNT A 208      -7.300  -5.765 -27.810  8.00  0.00           C  
ATOM   2942  C   CNT A 208      -7.988  -5.532 -26.600  6.00  0.00           C  
ATOM   2943  C   CNT A 208      -8.257  -4.148 -26.250  1.00  0.00           C  
ATOM   2944  C   CNT A 208      -8.498  -3.890 -24.900  0.00  0.00           C  
ATOM   2945  C   CNT A 208      -7.893  -6.478 -25.580  6.00  0.00           C  
ATOM   2946  C   CNT A 208      -7.858  -6.151 -24.190  5.00  0.00           C  
ATOM   2947  C   CNT A 208      -8.167  -4.810 -23.890  5.00  0.00           C  
ATOM   2948  C   CNT A 208      -7.647  -4.282 -22.680  2.00  0.00           C  
ATOM   2949  C   CNT A 208      -7.031  -6.904 -23.360  0.00  0.00           C  
ATOM   2950  C   CNT A 208      -6.220  -6.215 -22.440  7.00  0.00           C  
ATOM   2951  C   CNT A 208      -6.593  -4.941 -22.020  6.00  0.00           C  
ATOM   2952  C   CNT A 208      -5.523  -4.177 -21.440  0.00  0.00           C  
ATOM   2953  C   CNT A 208      -4.962  -6.791 -22.230  4.00  0.00           C  
ATOM   2954  C   CNT A 208      -3.876  -5.971 -21.870  5.00  0.00           C  
ATOM   2955  C   CNT A 208      -4.196  -4.654 -21.530  6.00  0.00           C  
ATOM   2956  C   CNT A 208      -3.135  -3.744 -21.460  2.00  0.00           C  
ATOM   2957  C   CNT A 208      -2.564  -6.335 -22.070  6.00  0.00           C  
ATOM   2958  C   CNT A 208      -1.637  -5.396 -22.530  3.00  0.00           C  
ATOM   2959  C   CNT A 208      -1.964  -4.076 -22.170  8.00  0.00           C  
ATOM   2960  C   CNT A 208      -1.240  -3.042 -22.810  0.00  0.00           C  
ATOM   2961  C   CNT A 208      -0.661  -5.738 -23.510  9.00  0.00           C  
ATOM   2962  C   CNT A 208      -0.226  -4.648 -24.360  7.00  0.00           C  
ATOM   2963  C   CNT A 208      -0.461  -3.317 -23.960  9.00  0.00           C  
ATOM   2964  C   CNT A 208      -0.571  -2.318 -24.940  6.00  0.00           C  
ATOM   2965  C   CNT A 208      -0.087  -4.999 -25.720  3.00  0.00           C  
ATOM   2966  C   CNT A 208      -0.595  -4.108 -26.660  8.00  0.00           C  
ATOM   2967  C   CNT A 208      -0.833  -2.737 -26.260  8.00  0.00           C  
ATOM   2968  C   CNT A 208      -1.574  -1.927 -27.150  9.00  0.00           C  
ATOM   2969  C   CNT A 208      -1.101  -4.561 -27.900  9.00  0.00           C  
ATOM   2970  C   CNT A 208      -2.197  -3.875 -28.480  6.00  0.00           C  
ATOM   2971  C   CNT A 208      -2.471  -2.568 -28.080  3.00  0.00           C  
ATOM   2972  C   CNT A 208      -3.733  -2.006 -28.380  7.00  0.00           C  
ATOM   2973  C   CNT A 208      -3.158  -4.617 -29.220  2.00  0.00           C  
ATOM   2974  C   CNT A 208      -4.484  -4.134 -29.260  6.00  0.00           C  
ATOM   2975  C   CNT A 208      -4.729  -2.795 -28.850  3.00  0.00           C  
ATOM   2976  C   CNT A 208      -6.025  -2.408 -28.400  9.00  0.00           C  
ATOM   2977  C   CNT A 208      -5.533  -5.042 -29.200  3.00  0.00           C  
ATOM   2978  C   CNT A 208      -6.682  -4.697 -28.520  0.00  0.00           C  
ATOM   2979  C   CNT A 208      -6.994  -3.408 -28.160  4.00  0.00           C  
ATOM   2980  C   CNT A 208      -7.901  -3.149 -27.120  3.00  0.00           C  
ATOM   2981  C   CNT A 208      -8.100  -1.780 -26.780  5.00  0.00           C  
ATOM   2982  C   CNT A 208      -8.727  -1.543 -25.540  2.00  0.00           C  
ATOM   2983  C   CNT A 208      -9.014  -0.209 -25.160  5.00  0.00           C  
ATOM   2984  C   CNT A 208      -9.205   0.150 -23.800  7.00  0.00           C  
ATOM   2985  C   CNT A 208      -8.706  -2.562 -24.550  6.00  0.00           C  
ATOM   2986  C   CNT A 208      -8.700  -2.138 -23.180  3.00  0.00           C  
ATOM   2987  C   CNT A 208      -8.926  -0.810 -22.800  9.00  0.00           C  
ATOM   2988  C   CNT A 208      -8.352  -0.290 -21.610  8.00  0.00           C  
ATOM   2989  C   CNT A 208      -7.841  -2.908 -22.380  6.00  0.00           C  
ATOM   2990  C   CNT A 208      -7.014  -2.247 -21.500  6.00  0.00           C  
ATOM   2991  C   CNT A 208      -7.358  -1.001 -20.990  8.00  0.00           C  
ATOM   2992  C   CNT A 208      -6.323  -0.206 -20.400  6.00  0.00           C  
ATOM   2993  C   CNT A 208      -5.824  -2.874 -21.110  5.00  0.00           C  
ATOM   2994  C   CNT A 208      -4.788  -2.035 -20.780  4.00  0.00           C  
ATOM   2995  C   CNT A 208      -4.995  -0.682 -20.530  8.00  0.00           C  
ATOM   2996  C   CNT A 208      -3.932   0.205 -20.250  8.00  0.00           C  
ATOM   2997  C   CNT A 208      -3.437  -2.440 -21.050  7.00  0.00           C  
ATOM   2998  C   CNT A 208      -2.474  -1.392 -21.400  1.00  0.00           C  
ATOM   2999  C   CNT A 208      -2.735  -0.042 -20.970  2.00  0.00           C  
ATOM   3000  C   CNT A 208      -2.053   0.986 -21.730  5.00  0.00           C  
ATOM   3001  C   CNT A 208      -1.460  -1.708 -22.370  3.00  0.00           C  
ATOM   3002  C   CNT A 208      -1.118  -0.645 -23.260  4.00  0.00           C  
ATOM   3003  C   CNT A 208      -1.448   0.674 -22.950  9.00  0.00           C  
ATOM   3004  C   CNT A 208      -1.549   1.617 -23.930  8.00  0.00           C  
ATOM   3005  C   CNT A 208      -0.921  -0.955 -24.610  5.00  0.00           C  
ATOM   3006  C   CNT A 208      -1.389  -0.036 -25.630  3.00  0.00           C  
ATOM   3007  C   CNT A 208      -1.720   1.294 -25.280  1.00  0.00           C  
ATOM   3008  C   CNT A 208      -2.449   2.090 -26.150  3.00  0.00           C  
ATOM   3009  C   CNT A 208      -1.838  -0.575 -26.870  1.00  0.00           C  
ATOM   3010  C   CNT A 208      -2.891   0.098 -27.530  6.00  0.00           C  
ATOM   3011  C   CNT A 208      -3.229   1.434 -27.150  9.00  0.00           C  
ATOM   3012  C   CNT A 208      -4.464   2.044 -27.520  6.00  0.00           C  
ATOM   3013  C   CNT A 208      -3.960  -0.680 -27.980  8.00  0.00           C  
ATOM   3014  C   CNT A 208      -5.287  -0.211 -28.080  3.00  0.00           C  
ATOM   3015  C   CNT A 208      -5.515   1.151 -27.790  8.00  0.00           C  
ATOM   3016  C   CNT A 208      -6.790   1.594 -27.430  6.00  0.00           C  
ATOM   3017  C   CNT A 208      -6.318  -1.115 -28.110  2.00  0.00           C  
ATOM   3018  C   CNT A 208      -7.530  -0.750 -27.520  2.00  0.00           C  
ATOM   3019  C   CNT A 208      -7.744   0.594 -27.120  4.00  0.00           C  
ATOM   3020  C   CNT A 208      -8.683   0.838 -26.120  7.00  0.00           C  
ATOM   3021  C   CNT A 208      -8.968   2.197 -25.750  9.00  0.00           C  
ATOM   3022  C   CNT A 208      -9.590   2.431 -24.470  1.00  0.00           C  
ATOM   3023  C   CNT A 208      -9.724   3.776 -24.060  7.00  0.00           C  
ATOM   3024  C   CNT A 208      -9.906   4.112 -22.700  7.00  0.00           C  
ATOM   3025  C   CNT A 208      -9.352   1.468 -23.450  5.00  0.00           C  
ATOM   3026  C   CNT A 208      -9.242   1.854 -22.100  0.00  0.00           C  
ATOM   3027  C   CNT A 208      -9.526   3.172 -21.750  8.00  0.00           C  
ATOM   3028  C   CNT A 208      -9.027   3.650 -20.520  6.00  0.00           C  
ATOM   3029  C   CNT A 208      -8.631   1.033 -21.190  8.00  0.00           C  
ATOM   3030  C   CNT A 208      -7.750   1.625 -20.230  9.00  0.00           C  
ATOM   3031  C   CNT A 208      -8.064   2.979 -19.770  2.00  0.00           C  
ATOM   3032  C   CNT A 208      -7.047   3.685 -19.140  9.00  0.00           C  
ATOM   3033  C   CNT A 208      -6.561   1.042 -19.800  2.00  0.00           C  
ATOM   3034  C   CNT A 208      -5.475   1.884 -19.460  4.00  0.00           C  
ATOM   3035  C   CNT A 208      -5.720   3.221 -19.160  5.00  0.00           C  
ATOM   3036  C   CNT A 208      -4.750   4.192 -19.260  6.00  0.00           C  
ATOM   3037  C   CNT A 208      -4.197   1.563 -19.910  9.00  0.00           C  
ATOM   3038  C   CNT A 208      -3.294   2.594 -20.290  9.00  0.00           C  
ATOM   3039  C   CNT A 208      -3.609   3.929 -19.990  4.00  0.00           C  
ATOM   3040  C   CNT A 208      -2.932   4.968 -20.640  9.00  0.00           C  
ATOM   3041  C   CNT A 208      -2.337   2.327 -21.340  6.00  0.00           C  
ATOM   3042  C   CNT A 208      -1.998   3.341 -22.220  7.00  0.00           C  
ATOM   3043  C   CNT A 208      -2.328   4.626 -21.870  9.00  0.00           C  
ATOM   3044  C   CNT A 208      -2.359   5.620 -22.880  9.00  0.00           C  
ATOM   3045  C   CNT A 208      -1.831   2.969 -23.570  9.00  0.00           C  
ATOM   3046  C   CNT A 208      -2.162   3.914 -24.580  8.00  0.00           C  
ATOM   3047  C   CNT A 208      -2.424   5.264 -24.220  8.00  0.00           C  
ATOM   3048  C   CNT A 208      -3.161   6.073 -25.150  0.00  0.00           C  
ATOM   3049  C   CNT A 208      -2.708   3.369 -25.800  2.00  0.00           C  
ATOM   3050  C   CNT A 208      -3.666   4.156 -26.510  6.00  0.00           C  
ATOM   3051  C   CNT A 208      -3.838   5.516 -26.230  2.00  0.00           C  
ATOM   3052  C   CNT A 208      -5.112   6.098 -26.460  9.00  0.00           C  
ATOM   3053  C   CNT A 208      -4.699   3.415 -27.290  3.00  0.00           C  
ATOM   3054  C   CNT A 208      -6.008   3.866 -27.170  6.00  0.00           C  
ATOM   3055  C   CNT A 208      -6.202   5.198 -26.800  8.00  0.00           C  
ATOM   3056  C   CNT A 208      -7.473   5.518 -26.290  8.00  0.00           C  
ATOM   3057  C   CNT A 208      -7.029   2.938 -27.050  4.00  0.00           C  
ATOM   3058  C   CNT A 208      -8.198   3.211 -26.320  4.00  0.00           C  
ATOM   3059  C   CNT A 208      -8.371   4.546 -25.880  8.00  0.00           C  
ATOM   3060  C   CNT A 208      -9.333   4.808 -24.920  5.00  0.00           C  
ATOM   3061  C   CNT A 208      -9.527   6.160 -24.570  9.00  0.00           C  
ATOM   3062  C   CNT A 208     -10.084   6.446 -23.330  8.00  0.00           C  
ATOM   3063  C   CNT A 208     -10.361   7.784 -22.930  1.00  0.00           C  
ATOM   3064  C   CNT A 208     -10.661   8.064 -21.600  0.00  0.00           C  
ATOM   3065  C   CNT A 208     -10.132   5.406 -22.380  0.00  0.00           C  
ATOM   3066  C   CNT A 208     -10.102   5.816 -20.990  7.00  0.00           C  
ATOM   3067  C   CNT A 208     -10.394   7.118 -20.570  4.00  0.00           C  
ATOM   3068  C   CNT A 208      -9.798   7.630 -19.390  3.00  0.00           C  
ATOM   3069  C   CNT A 208      -9.257   5.015 -20.190  7.00  0.00           C  
ATOM   3070  C   CNT A 208      -8.575   5.567 -19.100  4.00  0.00           C  
ATOM   3071  C   CNT A 208      -8.825   6.858 -18.730  0.00  0.00           C  
ATOM   3072  C   CNT A 208      -7.877   7.570 -17.910  8.00  0.00           C  
ATOM   3073  C   CNT A 208      -7.359   4.995 -18.710  1.00  0.00           C  
ATOM   3074  C   CNT A 208      -6.263   5.859 -18.340  5.00  0.00           C  
ATOM   3075  C   CNT A 208      -6.507   7.187 -17.990  7.00  0.00           C  
ATOM   3076  C   CNT A 208      -5.370   8.111 -18.010  9.00  0.00           C  
ATOM   3077  C   CNT A 208      -5.047   5.557 -18.900  6.00  0.00           C  
ATOM   3078  C   CNT A 208      -4.136   6.522 -19.260  1.00  0.00           C  
ATOM   3079  C   CNT A 208      -4.362   7.873 -18.900  6.00  0.00           C  
ATOM   3080  C   CNT A 208      -3.730   8.937 -19.560  7.00  0.00           C  
ATOM   3081  C   CNT A 208      -3.211   6.299 -20.290  1.00  0.00           C  
ATOM   3082  C   CNT A 208      -2.813   7.323 -21.190  1.00  0.00           C  
ATOM   3083  C   CNT A 208      -3.055   8.630 -20.790  8.00  0.00           C  
ATOM   3084  C   CNT A 208      -3.096   9.637 -21.790  6.00  0.00           C  
ATOM   3085  C   CNT A 208      -2.542   7.017 -22.510  3.00  0.00           C  
ATOM   3086  C   CNT A 208      -2.944   7.969 -23.510  4.00  0.00           C  
ATOM   3087  C   CNT A 208      -3.160   9.296 -23.120  4.00  0.00           C  
ATOM   3088  C   CNT A 208      -3.895  10.132 -24.040  7.00  0.00           C  
ATOM   3089  C   CNT A 208      -3.317   7.475 -24.790  9.00  0.00           C  
ATOM   3090  C   CNT A 208      -4.367   8.149 -25.440  8.00  0.00           C  
ATOM   3091  C   CNT A 208      -4.659   9.441 -25.010  0.00  0.00           C  
ATOM   3092  C   CNT A 208      -5.928  10.066 -25.320  9.00  0.00           C  
ATOM   3093  C   CNT A 208      -5.382   7.445 -26.120  7.00  0.00           C  
ATOM   3094  C   CNT A 208      -6.729   7.849 -26.010  3.00  0.00           C  
ATOM   3095  C   CNT A 208      -7.013   9.219 -25.700  1.00  0.00           C  
ATOM   3096  C   CNT A 208      -8.327   9.604 -25.370  1.00  0.00           C  
ATOM   3097  C   CNT A 208      -7.729   6.901 -25.990  5.00  0.00           C  
ATOM   3098  C   CNT A 208      -8.935   7.227 -25.340  1.00  0.00           C  
ATOM   3099  C   CNT A 208      -9.167   8.524 -24.900  8.00  0.00           C  
ATOM   3100  C   CNT A 208     -10.041   8.800 -23.850  6.00  0.00           C  
ATOM   3101  C   CNT A 208     -10.326  10.093 -23.430  2.00  0.00           C  
ATOM   3102  C   CNT A 208     -10.931  10.388 -22.180  9.00  0.00           C  
ATOM   3103  C   CNT A 208     -11.177  11.709 -21.820  2.00  0.00           C  
ATOM   3104  C   CNT A 208     -11.483  11.993 -20.500  2.00  0.00           C  
ATOM   3105  C   CNT A 208     -10.913   9.396 -21.160  1.00  0.00           C  
ATOM   3106  C   CNT A 208     -10.804   9.787 -19.840  5.00  0.00           C  
ATOM   3107  C   CNT A 208     -10.997  11.118 -19.510  9.00  0.00           C  
ATOM   3108  C   CNT A 208     -10.504  11.630 -18.280  9.00  0.00           C  
ATOM   3109  C   CNT A 208     -10.088   8.940 -18.940  6.00  0.00           C  
ATOM   3110  C   CNT A 208      -9.265   9.598 -17.980  7.00  0.00           C  
ATOM   3111  C   CNT A 208      -9.458  10.951 -17.690  1.00  0.00           C  
ATOM   3112  C   CNT A 208      -8.498  11.650 -16.920  1.00  0.00           C  
ATOM   3113  C   CNT A 208      -8.081   8.956 -17.540  9.00  0.00           C  
ATOM   3114  C   CNT A 208      -6.995   9.791 -17.270  6.00  0.00           C  
ATOM   3115  C   CNT A 208      -7.179  11.118 -16.890  2.00  0.00           C  
ATOM   3116  C   CNT A 208      -6.178  12.099 -16.920  0.00  0.00           C  
ATOM   3117  C   CNT A 208      -5.683   9.430 -17.700  8.00  0.00           C  
ATOM   3118  C   CNT A 208      -4.762  10.507 -18.040  9.00  0.00           C  
ATOM   3119  C   CNT A 208      -4.976  11.823 -17.650  5.00  0.00           C  
ATOM   3120  C   CNT A 208      -4.398  12.903 -18.370  2.00  0.00           C  
ATOM   3121  C   CNT A 208      -3.822  10.268 -19.110  6.00  0.00           C  
ATOM   3122  C   CNT A 208      -3.599  11.315 -20.000  8.00  0.00           C  
ATOM   3123  C   CNT A 208      -3.871  12.625 -19.670  9.00  0.00           C  
ATOM   3124  C   CNT A 208      -3.972  13.567 -20.620  0.00  0.00           C  
ATOM   3125  C   CNT A 208      -3.423  10.941 -21.380  1.00  0.00           C  
ATOM   3126  C   CNT A 208      -3.851  11.883 -22.320  9.00  0.00           C  
ATOM   3127  C   CNT A 208      -4.095  13.192 -21.950  0.00  0.00           C  
ATOM   3128  C   CNT A 208      -4.778  14.020 -22.830  4.00  0.00           C  
ATOM   3129  C   CNT A 208      -4.278  11.433 -23.620  6.00  0.00           C  
ATOM   3130  C   CNT A 208      -5.355  12.133 -24.310  0.00  0.00           C  
ATOM   3131  C   CNT A 208      -5.620  13.450 -23.900  6.00  0.00           C  
ATOM   3132  C   CNT A 208      -6.895  14.021 -24.250  6.00  0.00           C  
ATOM   3133  C   CNT A 208      -6.270  11.380 -25.030  2.00  0.00           C  
ATOM   3134  C   CNT A 208      -7.600  11.848 -24.960  5.00  0.00           C  
ATOM   3135  C   CNT A 208      -7.919  13.138 -24.580  2.00  0.00           C  
ATOM   3136  C   CNT A 208      -9.184  13.486 -24.190  9.00  0.00           C  
ATOM   3137  C   CNT A 208      -8.654  10.911 -25.010  5.00  0.00           C  
ATOM   3138  C   CNT A 208      -9.798  11.132 -24.210  0.00  0.00           C  
ATOM   3139  C   CNT A 208     -10.136  12.502 -23.880  4.00  0.00           C  
ATOM   3140  C   CNT A 208     -10.900  12.731 -22.750  3.00  0.00           C  
ATOM   3141  C   CNT A 208     -11.303  14.040 -22.440  4.00  0.00           C  
ATOM   3142  C   CNT A 208     -11.910  14.303 -21.130  9.00  0.00           C  
ATOM   3143  C   CNT A 208     -12.150  15.629 -20.760  8.00  0.00           C  
ATOM   3144  C   CNT A 208     -12.244  16.041 -19.380  0.00  0.00           C  
ATOM   3145  C   CNT A 208     -11.811  13.356 -20.150  3.00  0.00           C  
ATOM   3146  C   CNT A 208     -11.468  13.821 -18.860  1.00  0.00           C  
ATOM   3147  C   CNT A 208     -11.807  15.138 -18.450  5.00  0.00           C  
ATOM   3148  C   CNT A 208     -11.320  15.590 -17.190  9.00  0.00           C  
ATOM   3149  C   CNT A 208     -10.746  12.964 -17.970  2.00  0.00           C  
ATOM   3150  C   CNT A 208      -9.962  13.554 -16.850  7.00  0.00           C  
ATOM   3151  C   CNT A 208     -10.269  14.902 -16.570  8.00  0.00           C  
ATOM   3152  C   CNT A 208      -9.316  15.639 -15.830  4.00  0.00           C  
ATOM   3153  C   CNT A 208      -8.706  12.985 -16.660  2.00  0.00           C  
ATOM   3154  C   CNT A 208      -7.687  13.856 -16.260  4.00  0.00           C  
ATOM   3155  C   CNT A 208      -8.008  15.195 -15.840  9.00  0.00           C  
ATOM   3156  C   CNT A 208      -6.948  16.123 -15.880  5.00  0.00           C  
ATOM   3157  C   CNT A 208      -6.370  13.455 -16.540  2.00  0.00           C  
ATOM   3158  C   CNT A 208      -5.483  14.479 -16.920  9.00  0.00           C  
ATOM   3159  C   CNT A 208      -5.786  15.798 -16.560  9.00  0.00           C  
ATOM   3160  C   CNT A 208      -5.127  16.876 -17.200  4.00  0.00           C  
ATOM   3161  C   CNT A 208      -4.604  14.230 -18.010  7.00  0.00           C  
ATOM   3162  C   CNT A 208      -4.326  15.257 -18.890  4.00  0.00           C  
ATOM   3163  C   CNT A 208      -4.548  16.603 -18.440  5.00  0.00           C  
ATOM   3164  C   CNT A 208      -4.659  17.597 -19.500  1.00  0.00           C  
ATOM   3165  C   CNT A 208      -4.253  14.924 -20.220  6.00  0.00           C  
ATOM   3166  C   CNT A 208      -4.607  15.808 -21.240  0.00  0.00           C  
ATOM   3167  C   CNT A 208      -4.871  17.173 -20.850  2.00  0.00           C  
ATOM   3168  C   CNT A 208      -5.640  17.931 -21.690  8.00  0.00           C  
ATOM   3169  C   CNT A 208      -5.073  15.327 -22.450  6.00  0.00           C  
ATOM   3170  C   CNT A 208      -6.153  16.007 -23.030  2.00  0.00           C  
ATOM   3171  C   CNT A 208      -6.402  17.309 -22.650  5.00  0.00           C  
ATOM   3172  C   CNT A 208      -7.572  17.932 -23.030  4.00  0.00           C  
ATOM   3173  C   CNT A 208      -7.086  15.356 -23.850  6.00  0.00           C  
ATOM   3174  C   CNT A 208      -8.412  15.767 -23.910  7.00  0.00           C  
ATOM   3175  C   CNT A 208      -8.641  17.136 -23.570  1.00  0.00           C  
ATOM   3176  C   CNT A 208      -9.994  17.475 -23.110  4.00  0.00           C  
ATOM   3177  C   CNT A 208      -9.431  14.805 -23.840  0.00  0.00           C  
ATOM   3178  C   CNT A 208     -10.557  15.095 -23.030  1.00  0.00           C  
ATOM   3179  C   CNT A 208     -10.827  16.435 -22.720  3.00  0.00           C  
ATOM   3180  C   CNT A 208     -11.776  16.683 -21.690  1.00  0.00           C  
ATOM   3181  C   CNT A 208     -12.076  18.065 -21.270  8.00  0.00           C  
ATOM   3182  C   CNT A 208     -12.588  18.359 -19.950  5.00  0.00           C  
ATOM   3183  C   CNT A 208     -12.935  19.702 -19.630  3.00  0.00           C  
ATOM   3184  C   CNT A 208     -13.106  19.993 -18.270  7.00  0.00           C  
ATOM   3185  C   CNT A 208     -12.536  17.327 -18.990  7.00  0.00           C  
ATOM   3186  C   CNT A 208     -12.327  17.738 -17.640  6.00  0.00           C  
ATOM   3187  C   CNT A 208     -12.610  19.074 -17.330  6.00  0.00           C  
ATOM   3188  C   CNT A 208     -12.150  19.520 -16.050  5.00  0.00           C  
ATOM   3189  C   CNT A 208     -11.634  16.876 -16.750  0.00  0.00           C  
ATOM   3190  C   CNT A 208     -10.855  17.514 -15.760  2.00  0.00           C  
ATOM   3191  C   CNT A 208     -11.091  18.917 -15.410  8.00  0.00           C  
ATOM   3192  C   CNT A 208     -10.088  19.673 -14.840  6.00  0.00           C  
ATOM   3193  C   CNT A 208      -9.575  16.954 -15.370  5.00  0.00           C  
ATOM   3194  C   CNT A 208      -8.511  17.833 -15.130  3.00  0.00           C  
ATOM   3195  C   CNT A 208      -8.806  19.190 -14.840  8.00  0.00           C  
ATOM   3196  C   CNT A 208      -7.716  20.098 -14.840  2.00  0.00           C  
ATOM   3197  C   CNT A 208      -7.192  17.461 -15.540  4.00  0.00           C  
ATOM   3198  C   CNT A 208      -6.237  18.500 -15.830  7.00  0.00           C  
ATOM   3199  C   CNT A 208      -6.541  19.795 -15.510  4.00  0.00           C  
ATOM   3200  C   CNT A 208      -5.795  20.808 -16.220  4.00  0.00           C  
ATOM   3201  C   CNT A 208      -5.376  18.202 -16.920  1.00  0.00           C  
ATOM   3202  C   CNT A 208      -5.053  19.221 -17.820  0.00  0.00           C  
ATOM   3203  C   CNT A 208      -5.274  20.573 -17.490  0.00  0.00           C  
ATOM   3204  C   CNT A 208      -5.378  21.506 -18.500  1.00  0.00           C  
ATOM   3205  C   CNT A 208      -4.938  18.895 -19.170  6.00  0.00           C  
ATOM   3206  C   CNT A 208      -5.424  19.740 -20.150  5.00  0.00           C  
ATOM   3207  C   CNT A 208      -5.538  21.126 -19.870  8.00  0.00           C  
ATOM   3208  C   CNT A 208      -6.350  21.899 -20.690  0.00  0.00           C  
ATOM   3209  C   CNT A 208      -5.912  19.253 -21.340  5.00  0.00           C  
ATOM   3210  C   CNT A 208      -6.953  19.973 -22.020  3.00  0.00           C  
ATOM   3211  C   CNT A 208      -7.097  21.308 -21.800  1.00  0.00           C  
ATOM   3212  C   CNT A 208      -8.310  21.919 -22.160  7.00  0.00           C  
ATOM   3213  C   CNT A 208      -7.892  19.246 -22.750  4.00  0.00           C  
ATOM   3214  C   CNT A 208      -9.220  19.759 -22.810  2.00  0.00           C  
ATOM   3215  C   CNT A 208      -9.419  21.079 -22.460  2.00  0.00           C  
ATOM   3216  C   CNT A 208     -10.683  21.455 -21.940  9.00  0.00           C  
ATOM   3217  C   CNT A 208     -10.307  18.822 -22.760  0.00  0.00           C  
ATOM   3218  C   CNT A 208     -11.350  19.106 -21.890  5.00  0.00           C  
ATOM   3219  C   CNT A 208     -11.557  20.467 -21.570  7.00  0.00           C  
ATOM   3220  C   CNT A 208     -12.544  20.716 -20.550  4.00  0.00           C  
ATOM   3221  C   CNT A 208     -12.785  22.071 -20.210  5.00  0.00           C  
ATOM   3222  C   CNT A 208     -13.272  22.375 -18.900  1.00  0.00           C  
ATOM   3223  C   CNT A 208     -13.530  23.676 -18.540  9.00  0.00           C  
ATOM   3224  C   CNT A 208     -13.682  23.966 -17.230  7.00  0.00           C  
ATOM   3225  C   CNT A 208     -13.252  21.339 -17.950  0.00  0.00           C  
ATOM   3226  C   CNT A 208     -13.129  21.686 -16.580  7.00  0.00           C  
ATOM   3227  C   CNT A 208     -13.220  23.062 -16.280  2.00  0.00           C  
ATOM   3228  C   CNT A 208     -12.917  23.503 -14.960  1.00  0.00           C  
ATOM   3229  C   CNT A 208     -12.356  20.859 -15.710  9.00  0.00           C  
ATOM   3230  C   CNT A 208     -11.573  21.531 -14.820  0.00  0.00           C  
ATOM   3231  C   CNT A 208     -11.844  22.835 -14.310  9.00  0.00           C  
ATOM   3232  C   CNT A 208     -10.884  23.561 -13.700  5.00  0.00           C  
ATOM   3233  C   CNT A 208     -10.316  20.980 -14.530  9.00  0.00           C  
ATOM   3234  C   CNT A 208      -9.243  21.806 -14.190  0.00  0.00           C  
ATOM   3235  C   CNT A 208      -9.548  23.131 -13.760  6.00  0.00           C  
ATOM   3236  C   CNT A 208      -8.429  24.067 -13.890  7.00  0.00           C  
ATOM   3237  C   CNT A 208      -8.023  21.409 -14.520  9.00  0.00           C  
ATOM   3238  C   CNT A 208      -7.123  22.396 -14.960  1.00  0.00           C  
ATOM   3239  C   CNT A 208      -7.303  23.728 -14.570  3.00  0.00           C  
ATOM   3240  C   CNT A 208      -6.638  24.773 -15.210  0.00  0.00           C  
ATOM   3241  C   CNT A 208      -6.068  22.115 -15.890  2.00  0.00           C  
ATOM   3242  C   CNT A 208      -5.693  23.206 -16.800  4.00  0.00           C  
ATOM   3243  C   CNT A 208      -6.110  24.495 -16.510  1.00  0.00           C  
ATOM   3244  C   CNT A 208      -6.101  25.515 -17.430  3.00  0.00           C  
ATOM   3245  C   CNT A 208      -5.638  22.842 -18.150  7.00  0.00           C  
ATOM   3246  C   CNT A 208      -5.993  23.746 -19.140  2.00  0.00           C  
ATOM   3247  C   CNT A 208      -6.318  25.078 -18.760  3.00  0.00           C  
ATOM   3248  C   CNT A 208      -7.054  25.838 -19.610  3.00  0.00           C  
ATOM   3249  C   CNT A 208      -6.479  23.294 -20.370  7.00  0.00           C  
ATOM   3250  C   CNT A 208      -7.495  23.983 -21.080  8.00  0.00           C  
ATOM   3251  C   CNT A 208      -7.764  25.304 -20.640  0.00  0.00           C  
ATOM   3252  C   CNT A 208      -9.041  25.867 -20.890  6.00  0.00           C  
ATOM   3253  C   CNT A 208      -8.554  23.201 -21.660  8.00  0.00           C  
ATOM   3254  C   CNT A 208      -9.916  23.689 -21.670  9.00  0.00           C  
ATOM   3255  C   CNT A 208     -10.087  25.015 -21.230  8.00  0.00           C  
ATOM   3256  C   CNT A 208     -11.335  25.349 -20.760  3.00  0.00           C  
ATOM   3257  C   CNT A 208     -10.962  22.784 -21.660  0.00  0.00           C  
ATOM   3258  C   CNT A 208     -12.065  23.094 -20.870  2.00  0.00           C  
ATOM   3259  C   CNT A 208     -12.220  24.386 -20.380  0.00  0.00           C  
ATOM   3260  C   CNT A 208     -13.288  24.681 -19.510  9.00  0.00           C  
ATOM   3261  C   CNT A 208     -13.531  25.982 -19.080  9.00  0.00           C  
ATOM   3262  C   CNT A 208     -14.078  26.257 -17.800  1.00  0.00           C  
ATOM   3263  C   CNT A 208     -14.337  27.610 -17.450  7.00  0.00           C  
ATOM   3264  C   CNT A 208     -14.587  27.906 -16.090  5.00  0.00           C  
ATOM   3265  C   CNT A 208     -14.028  25.261 -16.840  5.00  0.00           C  
ATOM   3266  C   CNT A 208     -13.994  25.659 -15.510  2.00  0.00           C  
ATOM   3267  C   CNT A 208     -14.318  26.939 -15.060  6.00  0.00           C  
ATOM   3268  C   CNT A 208     -13.708  27.524 -13.860  6.00  0.00           C  
ATOM   3269  C   CNT A 208     -13.217  24.857 -14.600  8.00  0.00           C  
ATOM   3270  C   CNT A 208     -12.401  25.492 -13.690  8.00  0.00           C  
ATOM   3271  C   CNT A 208     -12.613  26.844 -13.320  5.00  0.00           C  
ATOM   3272  C   CNT A 208     -11.609  27.604 -12.710  2.00  0.00           C  
ATOM   3273  C   CNT A 208     -11.141  24.934 -13.440  4.00  0.00           C  
ATOM   3274  C   CNT A 208     -10.095  25.780 -13.120  0.00  0.00           C  
ATOM   3275  C   CNT A 208     -10.306  27.130 -12.770  1.00  0.00           C  
ATOM   3276  C   CNT A 208      -9.218  28.023 -12.810  9.00  0.00           C  
ATOM   3277  C   CNT A 208      -8.828  25.369 -13.530  1.00  0.00           C  
ATOM   3278  C   CNT A 208      -7.932  26.364 -13.930  7.00  0.00           C  
ATOM   3279  C   CNT A 208      -8.113  27.712 -13.620  0.00  0.00           C  
ATOM   3280  C   CNT A 208      -7.376  28.750 -14.190  0.00  0.00           C  
ATOM   3281  C   CNT A 208      -6.958  26.060 -14.920  0.00  0.00           C  
ATOM   3282  C   CNT A 208      -6.575  27.162 -15.740  9.00  0.00           C  
ATOM   3283  C   CNT A 208      -6.745  28.479 -15.390  3.00  0.00           C  
ATOM   3284  C   CNT A 208      -6.735  29.463 -16.330  2.00  0.00           C  
ATOM   3285  C   CNT A 208      -6.276  26.862 -17.070  7.00  0.00           C  
ATOM   3286  C   CNT A 208      -6.822  27.752 -18.050  8.00  0.00           C  
ATOM   3287  C   CNT A 208      -6.968  29.072 -17.700  8.00  0.00           C  
ATOM   3288  C   CNT A 208      -7.780  29.872 -18.500  9.00  0.00           C  
ATOM   3289  C   CNT A 208      -7.272  27.216 -19.250  8.00  0.00           C  
ATOM   3290  C   CNT A 208      -8.313  27.892 -19.890  9.00  0.00           C  
ATOM   3291  C   CNT A 208      -8.581  29.230 -19.520  0.00  0.00           C  
ATOM   3292  C   CNT A 208      -9.836  29.781 -19.790  9.00  0.00           C  
ATOM   3293  C   CNT A 208      -9.289  27.209 -20.550  6.00  0.00           C  
ATOM   3294  C   CNT A 208     -10.637  27.611 -20.570  6.00  0.00           C  
ATOM   3295  C   CNT A 208     -10.903  28.951 -20.260  1.00  0.00           C  
ATOM   3296  C   CNT A 208     -12.181  29.320 -19.840  6.00  0.00           C  
ATOM   3297  C   CNT A 208     -11.646  26.661 -20.440  4.00  0.00           C  
ATOM   3298  C   CNT A 208     -12.828  27.014 -19.720  7.00  0.00           C  
ATOM   3299  C   CNT A 208     -13.076  28.344 -19.400  8.00  0.00           C  
ATOM   3300  C   CNT A 208     -13.908  28.601 -18.290  5.00  0.00           C  
ATOM   3301  C   CNT A 208     -14.260  29.973 -18.000  6.00  0.00           C  
ATOM   3302  C   CNT A 208     -14.907  30.218 -16.770  1.00  0.00           C  
ATOM   3303  C   CNT A 208     -15.150  31.544 -16.410  0.00  0.00           C  
ATOM   3304  C   CNT A 208     -15.309  31.906 -15.050  0.00  0.00           C  
ATOM   3305  C   CNT A 208     -14.795  29.238 -15.760  1.00  0.00           C  
ATOM   3306  C   CNT A 208     -14.580  29.674 -14.450  9.00  0.00           C  
ATOM   3307  C   CNT A 208     -14.888  31.016 -14.110  2.00  0.00           C  
ATOM   3308  C   CNT A 208     -14.426  31.525 -12.860  1.00  0.00           C  
ATOM   3309  C   CNT A 208     -13.926  28.838 -13.560  5.00  0.00           C  
ATOM   3310  C   CNT A 208     -13.215  29.435 -12.540  9.00  0.00           C  
ATOM   3311  C   CNT A 208     -13.384  30.780 -12.270  2.00  0.00           C  
ATOM   3312  C   CNT A 208     -12.435  31.490 -11.540  7.00  0.00           C  
ATOM   3313  C   CNT A 208     -11.898  28.919 -12.390  1.00  0.00           C  
ATOM   3314  C   CNT A 208     -10.821  29.722 -11.990  3.00  0.00           C  
ATOM   3315  C   CNT A 208     -11.089  31.059 -11.590  1.00  0.00           C  
ATOM   3316  C   CNT A 208     -10.023  31.992 -11.530  6.00  0.00           C  
ATOM   3317  C   CNT A 208      -9.545  29.345 -12.430  4.00  0.00           C  
ATOM   3318  C   CNT A 208      -8.578  30.361 -12.760  5.00  0.00           C  
ATOM   3319  C   CNT A 208      -8.827  31.659 -12.320  4.00  0.00           C  
ATOM   3320  C   CNT A 208      -8.127  32.707 -12.950  2.00  0.00           C  
ATOM   3321  C   CNT A 208      -7.624  30.055 -13.740  8.00  0.00           C  
ATOM   3322  C   CNT A 208      -7.195  31.149 -14.590  0.00  0.00           C  
ATOM   3323  C   CNT A 208      -7.554  32.503 -14.250  6.00  0.00           C  
ATOM   3324  C   CNT A 208      -7.659  33.433 -15.250  4.00  0.00           C  
ATOM   3325  C   CNT A 208      -6.987  30.836 -15.980  1.00  0.00           C  
ATOM   3326  C   CNT A 208      -7.534  31.706 -16.930  5.00  0.00           C  
ATOM   3327  C   CNT A 208      -7.869  32.985 -16.550  6.00  0.00           C  
ATOM   3328  C   CNT A 208      -8.585  33.800 -17.400  9.00  0.00           C  
ATOM   3329  C   CNT A 208      -8.002  31.231 -18.190  4.00  0.00           C  
ATOM   3330  C   CNT A 208      -9.104  31.897 -18.790  8.00  0.00           C  
ATOM   3331  C   CNT A 208      -9.379  33.225 -18.400  2.00  0.00           C  
ATOM   3332  C   CNT A 208     -10.596  33.839 -18.700  1.00  0.00           C  
ATOM   3333  C   CNT A 208     -10.144  31.104 -19.440  7.00  0.00           C  
ATOM   3334  C   CNT A 208     -11.438  31.612 -19.510  1.00  0.00           C  
ATOM   3335  C   CNT A 208     -11.679  32.983 -19.170  5.00  0.00           C  
ATOM   3336  C   CNT A 208     -12.978  33.390 -18.750  4.00  0.00           C  
ATOM   3337  C   CNT A 208     -12.417  30.659 -19.350  3.00  0.00           C  
ATOM   3338  C   CNT A 208     -13.553  31.011 -18.640  8.00  0.00           C  
ATOM   3339  C   CNT A 208     -13.817  32.353 -18.300  7.00  0.00           C  
ATOM   3340  C   CNT A 208     -14.762  32.640 -17.280  7.00  0.00           C  
ATOM   3341  C   CNT A 208     -15.049  33.966 -16.980  0.00  0.00           C  
ATOM   3342  C   CNT A 208     -15.536  34.262 -15.670  4.00  0.00           C  
ATOM   3343  C   CNT A 208     -15.791  35.540 -15.340  0.00  0.00           C  
ATOM   3344  C   CNT A 208     -16.047  35.864 -14.000  7.00  0.00           C  
ATOM   3345  C   CNT A 208     -15.497  33.250 -14.690  7.00  0.00           C  
ATOM   3346  C   CNT A 208     -15.427  33.609 -13.330  0.00  0.00           C  
ATOM   3347  C   CNT A 208     -15.724  34.923 -12.960  2.00  0.00           C  
ATOM   3348  C   CNT A 208     -15.205  35.400 -11.730  9.00  0.00           C  
ATOM   3349  C   CNT A 208     -14.704  32.818 -12.420  2.00  0.00           C  
ATOM   3350  C   CNT A 208     -13.913  33.374 -11.470  0.00  0.00           C  
ATOM   3351  C   CNT A 208     -14.124  34.717 -11.180  1.00  0.00           C  
ATOM   3352  C   CNT A 208     -13.205  35.416 -10.350  4.00  0.00           C  
ATOM   3353  C   CNT A 208     -12.704  32.776 -11.120  0.00  0.00           C  
ATOM   3354  C   CNT A 208     -11.595  33.643 -10.780  1.00  0.00           C  
ATOM   3355  C   CNT A 208     -11.847  34.961 -10.370  6.00  0.00           C  
ATOM   3356  C   CNT A 208     -10.830  35.918 -10.400  9.00  0.00           C  
ATOM   3357  C   CNT A 208     -10.273  33.323 -11.160  7.00  0.00           C  
ATOM   3358  C   CNT A 208      -9.430  34.336 -11.580  7.00  0.00           C  
ATOM   3359  C   CNT A 208      -9.742  35.647 -11.280  1.00  0.00           C  
ATOM   3360  C   CNT A 208      -9.061  36.678 -11.930  2.00  0.00           C  
ATOM   3361  C   CNT A 208      -8.510  34.064 -12.670  3.00  0.00           C  
ATOM   3362  C   CNT A 208      -8.121  35.075 -13.540  8.00  0.00           C  
ATOM   3363  C   CNT A 208      -8.444  36.402 -13.180  2.00  0.00           C  
ATOM   3364  C   CNT A 208      -8.430  37.431 -14.120  8.00  0.00           C  
ATOM   3365  C   CNT A 208      -7.834  34.758 -14.890  6.00  0.00           C  
ATOM   3366  C   CNT A 208      -8.256  35.667 -15.860  7.00  0.00           C  
ATOM   3367  C   CNT A 208      -8.567  37.020 -15.450  2.00  0.00           C  
ATOM   3368  C   CNT A 208      -9.235  37.851 -16.360  0.00  0.00           C  
ATOM   3369  C   CNT A 208      -8.863  35.158 -17.070  7.00  0.00           C  
ATOM   3370  C   CNT A 208      -9.884  35.909 -17.660  4.00  0.00           C  
ATOM   3371  C   CNT A 208     -10.066  37.279 -17.350  9.00  0.00           C  
ATOM   3372  C   CNT A 208     -11.332  37.819 -17.660  3.00  0.00           C  
ATOM   3373  C   CNT A 208     -10.866  35.166 -18.350  5.00  0.00           C  
ATOM   3374  C   CNT A 208     -12.177  35.660 -18.460  3.00  0.00           C  
ATOM   3375  C   CNT A 208     -12.400  36.929 -17.920  6.00  0.00           C  
ATOM   3376  C   CNT A 208     -13.709  37.309 -17.620  8.00  0.00           C  
ATOM   3377  C   CNT A 208     -13.259  34.693 -18.480  5.00  0.00           C  
ATOM   3378  C   CNT A 208     -14.417  34.989 -17.670  7.00  0.00           C  
ATOM   3379  C   CNT A 208     -14.668  36.361 -17.320  0.00  0.00           C  
ATOM   3380  C   CNT A 208     -15.573  36.633 -16.260  4.00  0.00           C  
ATOM   3381  C   CNT A 208     -15.902  37.954 -15.940  5.00  0.00           C  
ATOM   3382  C   CNT A 208     -16.335  38.234 -14.680  5.00  0.00           C  
ATOM   3383  C   CNT A 208     -16.630  39.543 -14.290  4.00  0.00           C  
ATOM   3384  C   CNT A 208     -16.927  39.851 -12.880  4.00  0.00           C  
ATOM   3385  C   CNT A 208     -16.300  37.219 -13.660  8.00  0.00           C  
ATOM   3386  C   CNT A 208     -16.211  37.559 -12.270  9.00  0.00           C  
ATOM   3387  C   CNT A 208     -16.480  38.892 -11.940  4.00  0.00           C  
ATOM   3388  C   CNT A 208     -15.981  39.365 -10.710  7.00  0.00           C  
ATOM   3389  C   CNT A 208     -15.537  36.728 -11.380  2.00  0.00           C  
ATOM   3390  C   CNT A 208     -14.752  37.329 -10.350  7.00  0.00           C  
ATOM   3391  C   CNT A 208     -14.995  38.654  -9.990  4.00  0.00           C  
ATOM   3392  C   CNT A 208     -14.017  39.390  -9.300  3.00  0.00           C  
ATOM   3393  C   CNT A 208     -13.473  36.796 -10.070  7.00  0.00           C  
ATOM   3394  C   CNT A 208     -12.413  37.662  -9.760  8.00  0.00           C  
ATOM   3395  C   CNT A 208     -12.683  38.981  -9.350  9.00  0.00           C  
ATOM   3396  C   CNT A 208     -11.617  39.938  -9.430  0.00  0.00           C  
ATOM   3397  C   CNT A 208     -11.125  37.291 -10.090  2.00  0.00           C  
ATOM   3398  C   CNT A 208     -10.137  38.280 -10.440  5.00  0.00           C  
ATOM   3399  C   CNT A 208     -10.405  39.603 -10.060  5.00  0.00           C  
ATOM   3400  C   CNT A 208      -9.783  40.676 -10.710  9.00  0.00           C  
ATOM   3401  C   CNT A 208      -9.253  38.025 -11.460  5.00  0.00           C  
ATOM   3402  C   CNT A 208      -8.934  39.054 -12.340  1.00  0.00           C  
ATOM   3403  C   CNT A 208      -9.121  40.409 -11.940  8.00  0.00           C  
ATOM   3404  C   CNT A 208      -9.189  41.432 -12.940  7.00  0.00           C  
ATOM   3405  C   CNT A 208      -8.710  38.772 -13.670  6.00  0.00           C  
ATOM   3406  C   CNT A 208      -9.183  39.670 -14.620  3.00  0.00           C  
ATOM   3407  C   CNT A 208      -9.366  41.001 -14.320  8.00  0.00           C  
ATOM   3408  C   CNT A 208     -10.120  41.810 -15.200  7.00  0.00           C  
ATOM   3409  C   CNT A 208      -9.537  39.171 -15.930  1.00  0.00           C  
ATOM   3410  C   CNT A 208     -10.615  39.835 -16.550  5.00  0.00           C  
ATOM   3411  C   CNT A 208     -10.903  41.149 -16.180  7.00  0.00           C  
ATOM   3412  C   CNT A 208     -12.132  41.743 -16.560  1.00  0.00           C  
ATOM   3413  C   CNT A 208     -11.586  39.111 -17.280  8.00  0.00           C  
ATOM   3414  C   CNT A 208     -12.882  39.501 -17.190  0.00  0.00           C  
ATOM   3415  C   CNT A 208     -13.185  40.865 -16.880  6.00  0.00           C  
ATOM   3416  C   CNT A 208     -14.468  41.293 -16.570  5.00  0.00           C  
ATOM   3417  C   CNT A 208     -13.992  38.637 -17.190  1.00  0.00           C  
ATOM   3418  C   CNT A 208     -15.215  38.985 -16.610  4.00  0.00           C  
ATOM   3419  C   CNT A 208     -15.442  40.324 -16.250  6.00  0.00           C  
ATOM   3420  C   CNT A 208     -16.324  40.605 -15.210  4.00  0.00           C  
ATOM   3421  C   CNT A 208     -16.522  41.890 -14.750  3.00  0.00           C  
ATOM   3422  C   CNT A 208     -17.175  42.181 -13.530  0.00  0.00           C  
ATOM   3423  C   CNT A 208     -17.587  43.452 -13.300  4.00  0.00           C  
ATOM   3424  C   CNT A 208     -17.832  43.772 -11.940  5.00  0.00           C  
ATOM   3425  C   CNT A 208     -17.181  41.167 -12.530  8.00  0.00           C  
ATOM   3426  C   CNT A 208     -16.951  41.591 -11.240  2.00  0.00           C  
ATOM   3427  C   CNT A 208     -17.311  42.860 -10.920  4.00  0.00           C  
ATOM   3428  C   CNT A 208     -16.761  43.399  -9.740  4.00  0.00           C  
ATOM   3429  C   CNT A 208     -16.177  40.757 -10.450  3.00  0.00           C  
ATOM   3430  C   CNT A 208     -15.432  41.357  -9.420  5.00  0.00           C  
ATOM   3431  C   CNT A 208     -15.727  42.671  -9.100  9.00  0.00           C  
ATOM   3432  C   CNT A 208     -14.842  43.437  -8.350  0.00  0.00           C  
ATOM   3433  C   CNT A 208     -14.226  40.772  -8.970  9.00  0.00           C  
ATOM   3434  C   CNT A 208     -13.177  41.621  -8.610  4.00  0.00           C  
ATOM   3435  C   CNT A 208     -13.472  42.981  -8.270  4.00  0.00           C  
ATOM   3436  C   CNT A 208     -12.444  43.906  -8.240  4.00  0.00           C  
ATOM   3437  C   CNT A 208     -11.865  41.236  -8.990  2.00  0.00           C  
ATOM   3438  C   CNT A 208     -10.997  42.287  -9.340  6.00  0.00           C  
ATOM   3439  C   CNT A 208     -11.310  43.635  -9.050  5.00  0.00           C  
ATOM   3440  C   CNT A 208     -10.669  44.671  -9.730  4.00  0.00           C  
ATOM   3441  C   CNT A 208     -10.038  42.004 -10.330  2.00  0.00           C  
ATOM   3442  C   CNT A 208      -9.807  43.028 -11.290  3.00  0.00           C  
ATOM   3443  C   CNT A 208     -10.101  44.392 -10.920  8.00  0.00           C  
ATOM   3444  C   CNT A 208     -10.126  45.356 -11.960  9.00  0.00           C  
ATOM   3445  C   CNT A 208      -9.577  42.742 -12.610  6.00  0.00           C  
ATOM   3446  C   CNT A 208      -9.995  43.593 -13.570  7.00  0.00           C  
ATOM   3447  C   CNT A 208     -10.250  44.914 -13.260  4.00  0.00           C  
ATOM   3448  C   CNT A 208     -10.916  45.725 -14.220  4.00  0.00           C  
ATOM   3449  C   CNT A 208     -10.417  43.110 -14.830  3.00  0.00           C  
ATOM   3450  C   CNT A 208     -11.369  43.821 -15.550  1.00  0.00           C  
ATOM   3451  C   CNT A 208     -11.581  45.164 -15.330  4.00  0.00           C  
ATOM   3452  C   CNT A 208     -12.875  45.755 -15.710  6.00  0.00           C  
ATOM   3453  C   CNT A 208     -12.379  43.108 -16.250  3.00  0.00           C  
ATOM   3454  C   CNT A 208     -13.696  43.564 -16.270  1.00  0.00           C  
ATOM   3455  C   CNT A 208     -13.971  44.884 -15.910  4.00  0.00           C  
ATOM   3456  C   CNT A 208     -15.261  45.221 -15.490  2.00  0.00           C  
ATOM   3457  C   CNT A 208     -14.706  42.615 -16.220  6.00  0.00           C  
ATOM   3458  C   CNT A 208     -15.838  42.917 -15.430  8.00  0.00           C  
ATOM   3459  C   CNT A 208     -16.168  44.244 -15.140  2.00  0.00           C  
ATOM   3460  C   CNT A 208     -17.181  44.470 -14.160  0.00  0.00           C  
ATOM   3461  C   CNT A 208     -17.394  45.793 -13.730  2.00  0.00           C  
ATOM   3462  C   CNT A 208     -18.189  46.081 -12.600  9.00  0.00           C  
ATOM   3463  C   CNT A 208     -18.414  47.459 -12.260  7.00  0.00           C  
ATOM   3464  C   CNT A 208     -18.524  47.815 -10.850  5.00  0.00           C  
ATOM   3465  C   CNT A 208     -18.123  45.111 -11.550  2.00  0.00           C  
ATOM   3466  C   CNT A 208     -17.814  45.587 -10.220  9.00  0.00           C  
ATOM   3467  C   CNT A 208     -18.048  46.901  -9.830  4.00  0.00           C  
ATOM   3468  C   CNT A 208     -17.704  47.348  -8.560  3.00  0.00           C  
ATOM   3469  C   CNT A 208     -17.111  44.755  -9.380  5.00  0.00           C  
ATOM   3470  C   CNT A 208     -16.375  45.335  -8.290  1.00  0.00           C  
ATOM   3471  C   CNT A 208     -16.602  46.679  -7.930  0.00  0.00           C  
ATOM   3472  C   CNT A 208     -15.693  47.383  -7.140  9.00  0.00           C  
ATOM   3473  C   CNT A 208     -15.097  44.761  -7.980  1.00  0.00           C  
ATOM   3474  C   CNT A 208     -14.060  45.560  -7.440  4.00  0.00           C  
ATOM   3475  C   CNT A 208     -14.350  46.910  -7.070  3.00  0.00           C  
ATOM   3476  C   CNT A 208     -13.332  47.919  -7.220  6.00  0.00           C  
ATOM   3477  C   CNT A 208     -12.746  45.215  -7.780  2.00  0.00           C  
ATOM   3478  C   CNT A 208     -11.930  46.282  -8.350  4.00  0.00           C  
ATOM   3479  C   CNT A 208     -12.223  47.590  -8.030  7.00  0.00           C  
ATOM   3480  C   CNT A 208     -11.579  48.589  -8.750  4.00  0.00           C  
ATOM   3481  C   CNT A 208     -10.992  45.987  -9.420  3.00  0.00           C  
ATOM   3482  C   CNT A 208     -10.694  47.015 -10.330  0.00  0.00           C  
ATOM   3483  C   CNT A 208     -10.951  48.339  -9.980  3.00  0.00           C  
ATOM   3484  C   CNT A 208     -10.884  49.288 -10.990  9.00  0.00           C  
ATOM   3485  C   CNT A 208     -10.278  46.703 -11.670  0.00  0.00           C  
ATOM   3486  C   CNT A 208     -10.797  47.551 -12.680  5.00  0.00           C  
ATOM   3487  C   CNT A 208     -11.030  48.888 -12.350  2.00  0.00           C  
ATOM   3488  C   CNT A 208     -11.741  49.750 -13.190  4.00  0.00           C  
ATOM   3489  C   CNT A 208     -11.144  47.069 -13.950  0.00  0.00           C  
ATOM   3490  C   CNT A 208     -12.142  47.815 -14.600  3.00  0.00           C  
ATOM   3491  C   CNT A 208     -12.492  49.191 -14.220  5.00  0.00           C  
ATOM   3492  C   CNT A 208     -13.740  49.703 -14.520  1.00  0.00           C  
ATOM   3493  C   CNT A 208     -13.132  47.091 -15.310  5.00  0.00           C  
ATOM   3494  C   CNT A 208     -14.474  47.467 -15.090  5.00  0.00           C  
ATOM   3495  C   CNT A 208     -14.759  48.801 -14.850  3.00  0.00           C  
ATOM   3496  C   CNT A 208     -16.077  49.189 -14.380  5.00  0.00           C  
ATOM   3497  C   CNT A 208     -15.528  46.551 -15.030  7.00  0.00           C  
ATOM   3498  C   CNT A 208     -16.646  46.829 -14.290  6.00  0.00           C  
ATOM   3499  C   CNT A 208     -16.909  48.178 -13.980  5.00  0.00           C  
ATOM   3500  C   CNT A 208     -17.889  48.486 -13.020  1.00  0.00           C  
ATOM   3501  C   CNT A 208     -18.144  49.789 -12.670  3.00  0.00           C  
ATOM   3502  C   CNT A 208     -18.788  50.067 -11.440  3.00  0.00           C  
ATOM   3503  C   CNT A 208     -19.036  51.413 -11.080  6.00  0.00           C  
ATOM   3504  C   CNT A 208     -19.279  51.743  -9.740  6.00  0.00           C  
ATOM   3505  C   CNT A 208     -18.880  49.099 -10.400  4.00  0.00           C  
ATOM   3506  C   CNT A 208     -18.806  49.455  -9.030  7.00  0.00           C  
ATOM   3507  C   CNT A 208     -18.994  50.852  -8.750  3.00  0.00           C  
ATOM   3508  C   CNT A 208     -18.557  51.340  -7.500  0.00  0.00           C  
ATOM   3509  C   CNT A 208     -18.053  48.637  -8.170  7.00  0.00           C  
ATOM   3510  C   CNT A 208     -17.292  49.254  -7.150  2.00  0.00           C  
ATOM   3511  C   CNT A 208     -17.531  50.615  -6.830  0.00  0.00           C  
ATOM   3512  C   CNT A 208     -16.568  51.406  -6.130  6.00  0.00           C  
ATOM   3513  C   CNT A 208     -15.981  48.719  -6.840  1.00  0.00           C  
ATOM   3514  C   CNT A 208     -14.928  49.633  -6.560  7.00  0.00           C  
ATOM   3515  C   CNT A 208     -15.233  50.958  -6.270  8.00  0.00           C  
ATOM   3516  C   CNT A 208     -14.154  51.908  -6.350  0.00  0.00           C  
ATOM   3517  C   CNT A 208     -13.616  49.249  -6.970  6.00  0.00           C  
ATOM   3518  C   CNT A 208     -12.756  50.238  -7.400  6.00  0.00           C  
ATOM   3519  C   CNT A 208     -13.022  51.599  -7.060  0.00  0.00           C  
ATOM   3520  C   CNT A 208     -12.296  52.581  -7.690  7.00  0.00           C  
ATOM   3521  C   CNT A 208     -11.746  49.980  -8.390  6.00  0.00           C  
ATOM   3522  C   CNT A 208     -11.314  50.998  -9.300  0.00  0.00           C  
ATOM   3523  C   CNT A 208     -11.734  52.296  -8.980  8.00  0.00           C  
ATOM   3524  C   CNT A 208     -11.772  53.302  -9.980  7.00  0.00           C  
ATOM   3525  C   CNT A 208     -11.156  50.653 -10.670  5.00  0.00           C  
ATOM   3526  C   CNT A 208     -11.470  51.566 -11.660  9.00  0.00           C  
ATOM   3527  C   CNT A 208     -11.781  52.889 -11.330  3.00  0.00           C  
ATOM   3528  C   CNT A 208     -12.440  53.708 -12.210  4.00  0.00           C  
ATOM   3529  C   CNT A 208     -11.937  51.111 -12.940  1.00  0.00           C  
ATOM   3530  C   CNT A 208     -13.000  51.770 -13.510  8.00  0.00           C  
ATOM   3531  C   CNT A 208     -13.207  53.096 -13.170  0.00  0.00           C  
ATOM   3532  C   CNT A 208     -14.485  53.661 -13.430  3.00  0.00           C  
ATOM   3533  C   CNT A 208     -14.019  51.002 -14.130  2.00  0.00           C  
ATOM   3534  C   CNT A 208     -15.352  51.475 -14.170  1.00  0.00           C  
ATOM   3535  C   CNT A 208     -15.565  52.834 -13.770  3.00  0.00           C  
ATOM   3536  C   CNT A 208     -16.887  53.173 -13.440  0.00  0.00           C  
ATOM   3537  C   CNT A 208     -16.402  50.514 -14.030  1.00  0.00           C  
ATOM   3538  C   CNT A 208     -17.519  50.848 -13.240  8.00  0.00           C  
ATOM   3539  C   CNT A 208     -17.723  52.184 -12.970  2.00  0.00           C  
ATOM   3540  C   CNT A 208     -18.654  52.489 -12.000  5.00  0.00           C  
ATOM   3541  C   CNT A 208     -18.884  53.792 -11.630  9.00  0.00           C  
ATOM   3542  C   CNT A 208     -19.481  54.078 -10.400  2.00  0.00           C  
ATOM   3543  C   CNT A 208     -19.941  55.418 -10.060  2.00  0.00           C  
ATOM   3544  C   CNT A 208     -20.279  55.568  -8.710  8.00  0.00           C  
ATOM   3545  C   CNT A 208     -19.491  53.134  -9.370  9.00  0.00           C  
ATOM   3546  C   CNT A 208     -19.463  53.519  -8.040  0.00  0.00           C  
ATOM   3547  C   CNT A 208     -19.892  54.767  -7.630  9.00  0.00           C  
ATOM   3548  C   CNT A 208     -19.616  55.102  -6.280  7.00  0.00           C  
ATOM   3549  C   CNT A 208     -18.807  52.674  -7.130  9.00  0.00           C  
ATOM   3550  C   CNT A 208     -18.052  53.351  -6.180  0.00  0.00           C  
ATOM   3551  C   CNT A 208     -18.408  54.682  -5.820  8.00  0.00           C  
ATOM   3552  C   CNT A 208     -17.427  55.449  -5.160  3.00  0.00           C  
ATOM   3553  C   CNT A 208     -16.886  52.745  -5.750  4.00  0.00           C  
ATOM   3554  C   CNT A 208     -15.801  53.592  -5.540  8.00  0.00           C  
ATOM   3555  C   CNT A 208     -16.051  54.965  -5.280  8.00  0.00           C  
ATOM   3556  C   CNT A 208     -14.908  55.780  -5.270  5.00  0.00           C  
ATOM   3557  C   CNT A 208     -14.494  53.199  -5.990  8.00  0.00           C  
ATOM   3558  C   CNT A 208     -13.580  54.218  -6.360  1.00  0.00           C  
ATOM   3559  C   CNT A 208     -13.734  55.537  -6.020  0.00  0.00           C  
ATOM   3560  C   CNT A 208     -12.968  56.534  -6.630  0.00  0.00           C  
ATOM   3561  C   CNT A 208     -12.596  53.928  -7.350  5.00  0.00           C  
ATOM   3562  C   CNT A 208     -12.266  54.953  -8.280  0.00  0.00           C  
ATOM   3563  C   CNT A 208     -12.505  56.305  -7.930  7.00  0.00           C  
ATOM   3564  C   CNT A 208     -12.303  57.193  -8.970  1.00  0.00           C  
ATOM   3565  C   CNT A 208     -11.963  54.680  -9.620  5.00  0.00           C  
ATOM   3566  C   CNT A 208     -12.294  55.567 -10.640  4.00  0.00           C  
ATOM   3567  C   CNT A 208     -12.566  56.920 -10.270  2.00  0.00           C  
ATOM   3568  C   CNT A 208     -13.189  57.682 -11.220  5.00  0.00           C  
ATOM   3569  C   CNT A 208     -12.702  55.063 -11.900  0.00  0.00           C  
ATOM   3570  C   CNT A 208     -13.729  55.726 -12.540  9.00  0.00           C  
ATOM   3571  C   CNT A 208     -13.979  57.096 -12.270  9.00  0.00           C  
ATOM   3572  C   CNT A 208     -15.142  57.676 -12.830  7.00  0.00           C  
ATOM   3573  C   CNT A 208     -14.768  55.016 -13.120  2.00  0.00           C  
ATOM   3574  C   CNT A 208     -16.077  55.496 -13.200  5.00  0.00           C  
ATOM   3575  C   CNT A 208     -16.357  56.854 -12.890  4.00  0.00           C  
ATOM   3576  C   CNT A 208     -17.699  57.130 -12.620  6.00  0.00           C  
ATOM   3577  C   CNT A 208     -17.152  54.552 -13.110  3.00  0.00           C  
ATOM   3578  C   CNT A 208     -18.319  54.839 -12.390  4.00  0.00           C  
ATOM   3579  C   CNT A 208     -18.612  56.172 -12.060  9.00  0.00           C  
ATOM   3580  C   CNT A 208     -19.472  56.442 -10.980  9.00  0.00           C  
ATOM   3581  N   LIG A 209      -7.917 -16.472 -26.900  4.00  0.00           N  
ATOM   3582  N   LIG A 209       3.001 -13.254 -30.380  8.00  0.00           N  
ATOM   3583  N   LIG A 209     -20.062  55.778  -4.200  4.00  0.00           N  
ATOM   3584  N   LIG A 209     -16.469  59.508 -13.450  5.00  0.00           N  
ATOM   3585  C   LIG A 209      -7.670 -15.806 -28.070  5.00  0.00           C  
ATOM   3586  C   LIG A 209       1.852 -13.256 -31.130  9.00  0.00           C  
ATOM   3587  C   LIG A 209     -20.526  56.038  -5.470  1.00  0.00           C  
ATOM   3588  C   LIG A 209     -15.087  59.200 -13.280  0.00  0.00           C  
ATOM   3589  O   LIG A 209      -7.612 -15.843 -29.260  0.00  0.00           O  
ATOM   3590  O   LIG A 209       1.199 -13.698 -31.960  7.00  0.00           O  
ATOM   3591  O   LIG A 209     -21.176  56.552  -6.280  2.00  0.00           O  
ATOM   3592  O   LIG A 209     -13.924  59.505 -13.250  2.00  0.00           O  
ATOM   3593  C1  LIG A 209      -8.686 -17.741 -26.880  1.00  0.00           C  
ATOM   3594  C1  LIG A 209       4.127 -14.212 -30.640  5.00  0.00           C  
ATOM   3595  C1  LIG A 209     -20.931  55.324  -3.180  2.00  0.00           C  
ATOM   3596  C1  LIG A 209     -16.907  60.541 -14.410  2.00  0.00           C  
ATOM   3597  N1  LIG A 209      -8.668 -17.754 -24.360  6.00  0.00           N  
ATOM   3598  N1  LIG A 209       5.330 -13.636 -28.500  9.00  0.00           N  
ATOM   3599  N1  LIG A 209     -19.406  53.511  -2.330  7.00  0.00           N  
ATOM   3600  N1  LIG A 209     -17.727  58.568 -15.630  0.00  0.00           N  
ATOM   3601  O1  LIG A 209      -6.561 -16.149 -20.490  5.00  0.00           O  
ATOM   3602  O1  LIG A 209       4.227 -12.356 -24.240  0.00  0.00           O  
ATOM   3603  O1  LIG A 209     -16.274  50.254  -2.980  1.00  0.00           O  
ATOM   3604  O1  LIG A 209     -18.512  54.011 -15.880  4.00  0.00           O  
ATOM   3605  C2  LIG A 209      -9.465 -17.907 -25.550  7.00  0.00           C  
ATOM   3606  C2  LIG A 209       5.438 -13.703 -29.930  5.00  0.00           C  
ATOM   3607  C2  LIG A 209     -20.099  54.723  -1.930  8.00  0.00           C  
ATOM   3608  C2  LIG A 209     -16.988  59.770 -15.730  7.00  0.00           C  
ATOM   3609  N2  LIG A 209      -7.233 -18.355 -22.670  7.00  0.00           N  
ATOM   3610  N2  LIG A 209       5.434 -14.274 -26.360  8.00  0.00           N  
ATOM   3611  N2  LIG A 209     -19.101  51.516  -3.220  3.00  0.00           N  
ATOM   3612  N2  LIG A 209     -19.466  57.105 -15.490  8.00  0.00           N  
ATOM   3613  C3  LIG A 209      -7.769 -18.730 -23.840  2.00  0.00           C  
ATOM   3614  C3  LIG A 209       5.649 -14.640 -27.650  7.00  0.00           C  
ATOM   3615  C3  LIG A 209     -19.940  52.530  -3.110  6.00  0.00           C  
ATOM   3616  C3  LIG A 209     -19.107  58.394 -15.390  5.00  0.00           C  
ATOM   3617  N3  LIG A 209      -8.890 -15.393 -23.800  5.00  0.00           N  
ATOM   3618  N3  LIG A 209       4.615 -11.309 -28.090  0.00  0.00           N  
ATOM   3619  N3  LIG A 209     -17.200  53.749  -1.270  6.00  0.00           N  
ATOM   3620  N3  LIG A 209     -15.905  57.030 -16.270  3.00  0.00           N  
ATOM   3621  C4  LIG A 209      -7.575 -17.018 -22.530  5.00  0.00           C  
ATOM   3622  C4  LIG A 209       4.908 -13.003 -26.450  2.00  0.00           C  
ATOM   3623  C4  LIG A 209     -17.955  51.908  -2.630  6.00  0.00           C  
ATOM   3624  C4  LIG A 209     -18.252  56.390 -15.790  6.00  0.00           C  
ATOM   3625  N4  LIG A 209      -7.810 -14.793 -21.730  8.00  0.00           N  
ATOM   3626  N4  LIG A 209       4.063 -10.887 -25.780  6.00  0.00           N  
ATOM   3627  N4  LIG A 209     -15.770  51.907  -1.670  1.00  0.00           N  
ATOM   3628  N4  LIG A 209     -16.688  54.810 -16.500  0.00  0.00           N  
ATOM   3629  C5  LIG A 209      -8.492 -16.682 -23.550  3.00  0.00           C  
ATOM   3630  C5  LIG A 209       4.892 -12.610 -27.740  7.00  0.00           C  
ATOM   3631  C5  LIG A 209     -18.105  53.123  -2.010  1.00  0.00           C  
ATOM   3632  C5  LIG A 209     -17.252  57.319 -15.950  5.00  0.00           C  
ATOM   3633  N5  LIG A 209      -8.776 -13.325 -23.000  9.00  0.00           N  
ATOM   3634  N5  LIG A 209       4.014  -9.290 -27.240  6.00  0.00           N  
ATOM   3635  N5  LIG A 209     -14.978  53.674  -0.600  7.00  0.00           N  
ATOM   3636  N5  LIG A 209     -14.608  55.378 -16.980  5.00  0.00           N  
ATOM   3637  C6  LIG A 209      -7.275 -16.006 -21.480  3.00  0.00           C  
ATOM   3638  C6  LIG A 209       4.432 -12.109 -25.380  6.00  0.00           C  
ATOM   3639  C6  LIG A 209     -16.625  51.305  -2.490  2.00  0.00           C  
ATOM   3640  C6  LIG A 209     -17.857  55.010 -16.020  2.00  0.00           C  
ATOM   3641  C7  LIG A 209      -8.593 -14.569 -22.790  1.00  0.00           C  
ATOM   3642  C7  LIG A 209       4.313 -10.531 -27.020  4.00  0.00           C  
ATOM   3643  C7  LIG A 209     -16.023  53.088  -1.170  3.00  0.00           C  
ATOM   3644  C7  LIG A 209     -15.750  55.708 -16.460  6.00  0.00           C  
ATOM   3645  H   LIG A 209      -7.150 -16.503 -26.270  2.00  0.00           H  
ATOM   3646  H   LIG A 209       3.135 -12.723 -29.540  8.00  0.00           H  
ATOM   3647  H   LIG A 209     -19.180  55.201  -4.090  5.00  0.00           H  
ATOM   3648  H   LIG A 209     -17.253  58.848 -13.310  1.00  0.00           H  
ATOM   3649  H1  LIG A 209      -8.121 -18.719 -26.870  2.00  0.00           H  
ATOM   3650  H1  LIG A 209       4.215 -14.192 -31.710  1.00  0.00           H  
ATOM   3651  H1  LIG A 209     -21.576  54.500  -3.530  4.00  0.00           H  
ATOM   3652  H1  LIG A 209     -16.205  61.349 -14.420  4.00  0.00           H  
ATOM   3653  H2  LIG A 209      -9.499 -17.681 -27.560  3.00  0.00           H  
ATOM   3654  H2  LIG A 209       3.881 -15.233 -30.310  2.00  0.00           H  
ATOM   3655  H2  LIG A 209     -21.531  56.185  -2.900  4.00  0.00           H  
ATOM   3656  H2  LIG A 209     -17.937  60.929 -14.200  7.00  0.00           H  
ATOM   3657  H3  LIG A 209      -9.995 -18.899 -25.500  0.00  0.00           H  
ATOM   3658  H3  LIG A 209       5.509 -12.733 -30.350  1.00  0.00           H  
ATOM   3659  H3  LIG A 209     -20.750  54.600  -1.090  6.00  0.00           H  
ATOM   3660  H3  LIG A 209     -16.065  59.635 -16.250  6.00  0.00           H  
ATOM   3661  H4  LIG A 209     -10.283 -17.186 -25.580  3.00  0.00           H  
ATOM   3662  H4  LIG A 209       6.287 -14.330 -30.180  5.00  0.00           H  
ATOM   3663  H4  LIG A 209     -19.299  55.477  -1.690  2.00  0.00           H  
ATOM   3664  H4  LIG A 209     -17.497  60.417 -16.500  1.00  0.00           H  
ATOM   3665  H5  LIG A 209      -7.632 -19.783 -24.270  8.00  0.00           H  
ATOM   3666  H5  LIG A 209       6.101 -15.560 -27.960  4.00  0.00           H  
ATOM   3667  H5  LIG A 209     -20.994  52.582  -3.440  5.00  0.00           H  
ATOM   3668  H5  LIG A 209     -19.784  59.260 -15.220  1.00  0.00           H  
ATOM   3669  H6  LIG A 209      -7.594 -14.058 -21.110  3.00  0.00           H  
ATOM   3670  H6  LIG A 209       3.767 -10.271 -25.080  8.00  0.00           H  
ATOM   3671  H6  LIG A 209     -14.924  51.454  -1.540  8.00  0.00           H  
ATOM   3672  H6  LIG A 209     -16.378  53.869 -16.670  4.00  0.00           H  
ATOM   3673  H7  LIG A 209      -8.192 -12.765 -22.380  9.00  0.00           H  
ATOM   3674  H7  LIG A 209       4.276  -8.785 -28.040  3.00  0.00           H  
ATOM   3675  H7  LIG A 209     -15.280  54.174   0.200  2.00  0.00           H  
ATOM   3676  H7  LIG A 209     -14.016  56.146 -17.110  0.00  0.00           H  
ATOM   3677  H8  LIG A 209      -9.204 -12.875 -23.810  5.00  0.00           H  
ATOM   3678  H8  LIG A 209       4.067  -8.643 -26.450  2.00  0.00           H  
ATOM   3679  H8  LIG A 209     -14.264  52.994  -0.410  9.00  0.00           H  
ATOM   3680  H8  LIG A 209     -14.523  54.554 -17.520  7.00  0.00           H  
END
