# Supplementary material for: Molecular Dynamics Study of the Interaction of Carbon Nanotubes with Telomeric DNA Fragment Containing Noncanonical G-Quadruplex and i-Motif Forms
Source: Int J Mol Sci. 2020 Mar 11;21(6):1925. doi: 10.3390/ijms21061925 (PMC7139311; doi:10.3390/ijms21061925)
Supplement: Supplementary file 1 [file ijms-21-01925-s001.zip › fig4_a20.pdb]

ATOM      1  C5' DG5 A   1      -5.351   7.092 -35.750  8.00  0.00           C  
ATOM      2  O5' DG5 A   1      -5.158   6.039 -36.710  0.00  0.00           O  
ATOM      3  C4' DG5 A   1      -6.357   6.906 -34.590  7.00  0.00           C  
ATOM      4  O4' DG5 A   1      -7.647   6.916 -35.230  8.00  0.00           O  
ATOM      5  C3' DG5 A   1      -6.155   5.620 -33.850  4.00  0.00           C  
ATOM      6  O3' DG5 A   1      -6.519   5.764 -32.500  7.00  0.00           O  
ATOM      7  C2' DG5 A   1      -7.366   4.848 -34.440  6.00  0.00           C  
ATOM      8  C1' DG5 A   1      -8.402   5.896 -34.570  9.00  0.00           C  
ATOM      9  N1  DG5 A   1     -13.481   6.778 -34.670  4.00  0.00           N  
ATOM     10  C2  DG5 A   1     -12.458   7.369 -33.990  9.00  0.00           C  
ATOM     11  N2  DG5 A   1     -12.721   8.363 -33.200  6.00  0.00           N  
ATOM     12  N3  DG5 A   1     -11.214   7.098 -34.080  4.00  0.00           N  
ATOM     13  C4  DG5 A   1     -10.909   6.123 -34.990  6.00  0.00           C  
ATOM     14  C5  DG5 A   1     -11.845   5.422 -35.700  4.00  0.00           C  
ATOM     15  C6  DG5 A   1     -13.200   5.864 -35.660  2.00  0.00           C  
ATOM     16  O6  DG5 A   1     -14.151   5.458 -36.320  6.00  0.00           O  
ATOM     17  N7  DG5 A   1     -11.231   4.403 -36.450  0.00  0.00           N  
ATOM     18  C8  DG5 A   1      -9.965   4.615 -36.190  8.00  0.00           C  
ATOM     19  N9  DG5 A   1      -9.680   5.595 -35.310  3.00  0.00           N  
ATOM     20 HO5' DG5 A   1      -5.445   6.279 -37.610  1.00  0.00           H  
ATOM     21  H1  DG5 A   1     -14.432   7.178 -34.670  0.00  0.00           H  
ATOM     22  H8  DG5 A   1      -9.217   3.864 -36.490  0.00  0.00           H  
ATOM     23  H1' DG5 A   1      -8.677   6.166 -33.610  8.00  0.00           H  
ATOM     24  H2' DG5 A   1      -7.059   4.419 -35.420  0.00  0.00           H  
ATOM     25  H21 DG5 A   1     -13.715   8.705 -33.140  4.00  0.00           H  
ATOM     26  H3' DG5 A   1      -5.217   5.060 -34.090  8.00  0.00           H  
ATOM     27  H22 DG5 A   1     -11.984   8.694 -32.670  5.00  0.00           H  
ATOM     28  H4' DG5 A   1      -6.280   7.714 -33.860  6.00  0.00           H  
ATOM     29  H5' DG5 A   1      -5.633   7.930 -36.330  8.00  0.00           H  
ATOM     30 H2'' DG5 A   1      -7.784   4.055 -33.840  1.00  0.00           H  
ATOM     31 H5'' DG5 A   1      -4.445   7.372 -35.270  1.00  0.00           H  
ATOM     32  P    DG A   2      -5.797   4.892 -31.370  1.00  0.00           P  
ATOM     33  C5'  DG A   2      -6.209   6.735 -29.540  7.00  0.00           C  
ATOM     34  O5'  DG A   2      -6.623   5.478 -30.110  3.00  0.00           O  
ATOM     35  C4'  DG A   2      -7.356   7.504 -28.930  9.00  0.00           C  
ATOM     36  O4'  DG A   2      -8.288   7.854 -30.000  7.00  0.00           O  
ATOM     37  C3'  DG A   2      -8.163   6.680 -27.920  6.00  0.00           C  
ATOM     38  O3'  DG A   2      -7.732   6.757 -26.540  8.00  0.00           O  
ATOM     39  C2'  DG A   2      -9.482   7.411 -28.030  1.00  0.00           C  
ATOM     40  C1'  DG A   2      -9.593   7.673 -29.520  0.00  0.00           C  
ATOM     41  N1   DG A   2     -14.152   6.138 -31.140  6.00  0.00           N  
ATOM     42  C2   DG A   2     -13.788   7.070 -30.260  2.00  0.00           C  
ATOM     43  N2   DG A   2     -14.757   7.794 -29.740  0.00  0.00           N  
ATOM     44  N3   DG A   2     -12.534   7.281 -29.860  1.00  0.00           N  
ATOM     45  C4   DG A   2     -11.608   6.483 -30.430  1.00  0.00           C  
ATOM     46  C5   DG A   2     -11.882   5.536 -31.370  0.00  0.00           C  
ATOM     47  C6   DG A   2     -13.254   5.240 -31.700  4.00  0.00           C  
ATOM     48  O6   DG A   2     -13.702   4.530 -32.570  8.00  0.00           O  
ATOM     49  N7   DG A   2     -10.654   4.999 -31.830  5.00  0.00           N  
ATOM     50  C8   DG A   2      -9.729   5.603 -31.110  6.00  0.00           C  
ATOM     51  N9   DG A   2     -10.253   6.537 -30.180  8.00  0.00           N  
ATOM     52  OP1  DG A   2      -4.426   5.372 -31.200  7.00  0.00           O  
ATOM     53  OP2  DG A   2      -6.038   3.447 -31.490  5.00  0.00           O1-
ATOM     54  H1   DG A   2     -15.083   6.157 -31.560  5.00  0.00           H  
ATOM     55  H8   DG A   2      -8.709   5.565 -31.350  5.00  0.00           H  
ATOM     56  H1'  DG A   2     -10.156   8.591 -29.600  4.00  0.00           H  
ATOM     57  H2'  DG A   2     -10.317   6.757 -27.660  2.00  0.00           H  
ATOM     58  H21  DG A   2     -15.774   7.535 -29.920  6.00  0.00           H  
ATOM     59  H3'  DG A   2      -8.192   5.585 -28.240  9.00  0.00           H  
ATOM     60  H22  DG A   2     -14.625   8.712 -29.330  1.00  0.00           H  
ATOM     61  H4'  DG A   2      -6.979   8.434 -28.590  1.00  0.00           H  
ATOM     62  H5'  DG A   2      -5.717   7.425 -30.350  2.00  0.00           H  
ATOM     63 H2''  DG A   2      -9.506   8.369 -27.540  9.00  0.00           H  
ATOM     64 H5''  DG A   2      -5.438   6.538 -28.770  3.00  0.00           H  
ATOM     65  P    DG A   3      -8.115   5.691 -25.420  5.00  0.00           P  
ATOM     66  C5'  DG A   3     -10.295   6.847 -24.540  5.00  0.00           C  
ATOM     67  O5'  DG A   3      -9.677   5.831 -25.240  3.00  0.00           O  
ATOM     68  C4'  DG A   3     -11.804   6.773 -24.500  9.00  0.00           C  
ATOM     69  O4'  DG A   3     -12.308   6.641 -25.830  6.00  0.00           O  
ATOM     70  C3'  DG A   3     -12.424   5.672 -23.660  8.00  0.00           C  
ATOM     71  O3'  DG A   3     -13.726   6.057 -23.130  7.00  0.00           O  
ATOM     72  C2'  DG A   3     -12.472   4.598 -24.750  2.00  0.00           C  
ATOM     73  C1'  DG A   3     -13.032   5.389 -25.950  0.00  0.00           C  
ATOM     74  N1   DG A   3     -15.430   2.555 -29.560  5.00  0.00           N  
ATOM     75  C2   DG A   3     -15.930   3.222 -28.520  2.00  0.00           C  
ATOM     76  N2   DG A   3     -17.228   3.171 -28.310  0.00  0.00           N  
ATOM     77  N3   DG A   3     -15.250   3.871 -27.610  7.00  0.00           N  
ATOM     78  C4   DG A   3     -13.929   3.984 -27.920  3.00  0.00           C  
ATOM     79  C5   DG A   3     -13.272   3.449 -28.980  3.00  0.00           C  
ATOM     80  C6   DG A   3     -14.062   2.629 -29.890  6.00  0.00           C  
ATOM     81  O6   DG A   3     -13.683   1.956 -30.920  2.00  0.00           O  
ATOM     82  N7   DG A   3     -11.877   3.690 -28.910  1.00  0.00           N  
ATOM     83  C8   DG A   3     -11.694   4.449 -27.880  5.00  0.00           C  
ATOM     84  N9   DG A   3     -12.913   4.662 -27.220  4.00  0.00           N  
ATOM     85  OP1  DG A   3      -7.520   6.163 -24.200  3.00  0.00           O  
ATOM     86  OP2  DG A   3      -7.890   4.294 -25.840  2.00  0.00           O1-
ATOM     87  H1   DG A   3     -16.027   1.930 -30.070  0.00  0.00           H  
ATOM     88  H8   DG A   3     -10.736   4.743 -27.470  6.00  0.00           H  
ATOM     89  H1'  DG A   3     -14.172   5.509 -25.790  1.00  0.00           H  
ATOM     90  H2'  DG A   3     -11.499   4.192 -25.030  4.00  0.00           H  
ATOM     91  H21  DG A   3     -17.793   2.531 -28.820  2.00  0.00           H  
ATOM     92  H3'  DG A   3     -11.769   5.360 -22.880  2.00  0.00           H  
ATOM     93  H22  DG A   3     -17.494   3.545 -27.450  8.00  0.00           H  
ATOM     94  H4'  DG A   3     -12.129   7.683 -24.130  5.00  0.00           H  
ATOM     95  H5'  DG A   3     -10.013   7.801 -24.870  2.00  0.00           H  
ATOM     96 H2''  DG A   3     -13.171   3.804 -24.410  9.00  0.00           H  
ATOM     97 H5''  DG A   3     -10.007   6.790 -23.490  8.00  0.00           H  
ATOM     98  P    DT A   4     -14.443   5.204 -22.040  3.00  0.00           P  
ATOM     99  C5'  DT A   4     -16.670   5.393 -23.420  9.00  0.00           C  
ATOM    100  O5'  DT A   4     -15.686   4.555 -22.760  8.00  0.00           O  
ATOM    101  C4'  DT A   4     -17.825   4.606 -24.040  1.00  0.00           C  
ATOM    102  O4'  DT A   4     -17.351   3.684 -25.050  1.00  0.00           O  
ATOM    103  C3'  DT A   4     -18.500   3.706 -22.940  9.00  0.00           C  
ATOM    104  O3'  DT A   4     -19.877   3.678 -23.220  0.00  0.00           O  
ATOM    105  C2'  DT A   4     -17.852   2.364 -23.130  6.00  0.00           C  
ATOM    106  C1'  DT A   4     -17.666   2.377 -24.660  4.00  0.00           C  
ATOM    107  N1   DT A   4     -16.652   1.640 -25.310  0.00  0.00           N  
ATOM    108  C2   DT A   4     -16.992   0.733 -26.330  9.00  0.00           C  
ATOM    109  O2   DT A   4     -18.084   0.665 -26.870  3.00  0.00           O  
ATOM    110  N3   DT A   4     -16.024  -0.108 -26.800  8.00  0.00           N  
ATOM    111  C4   DT A   4     -14.673   0.038 -26.590  3.00  0.00           C  
ATOM    112  O4   DT A   4     -13.911  -0.679 -27.230  5.00  0.00           O  
ATOM    113  C5   DT A   4     -14.346   0.959 -25.450  2.00  0.00           C  
ATOM    114  C6   DT A   4     -15.310   1.719 -24.870  5.00  0.00           C  
ATOM    115  C7   DT A   4     -12.897   1.094 -24.970  6.00  0.00           C  
ATOM    116  OP1  DT A   4     -14.927   6.088 -20.940  6.00  0.00           O  
ATOM    117  OP2  DT A   4     -13.579   4.036 -21.690  9.00  0.00           O1-
ATOM    118  H3   DT A   4     -16.272  -0.708 -27.630  2.00  0.00           H  
ATOM    119  H6   DT A   4     -15.127   2.324 -23.960  0.00  0.00           H  
ATOM    120  H1'  DT A   4     -18.604   2.141 -25.150  2.00  0.00           H  
ATOM    121  H2'  DT A   4     -16.863   2.211 -22.700  7.00  0.00           H  
ATOM    122  H3'  DT A   4     -18.408   4.165 -21.960  1.00  0.00           H  
ATOM    123  H4'  DT A   4     -18.482   5.362 -24.420  6.00  0.00           H  
ATOM    124  H5'  DT A   4     -16.165   6.018 -24.110  5.00  0.00           H  
ATOM    125  H71  DT A   4     -12.961   1.559 -24.030  0.00  0.00           H  
ATOM    126  H72  DT A   4     -12.583   0.139 -24.800  7.00  0.00           H  
ATOM    127  H73  DT A   4     -12.300   1.685 -25.640  9.00  0.00           H  
ATOM    128 H2''  DT A   4     -18.631   1.598 -22.800  4.00  0.00           H  
ATOM    129 H5''  DT A   4     -17.088   6.088 -22.650  3.00  0.00           H  
ATOM    130  P    DT A   5     -20.957   2.885 -22.200  3.00  0.00           P  
ATOM    131  C5'  DT A   5     -21.859   1.207 -24.130  7.00  0.00           C  
ATOM    132  O5'  DT A   5     -21.334   1.355 -22.780  3.00  0.00           O  
ATOM    133  C4'  DT A   5     -21.796  -0.228 -24.720  5.00  0.00           C  
ATOM    134  O4'  DT A   5     -20.479  -0.564 -24.950  0.00  0.00           O  
ATOM    135  C3'  DT A   5     -22.398  -1.300 -23.770  8.00  0.00           C  
ATOM    136  O3'  DT A   5     -23.118  -2.192 -24.570  2.00  0.00           O  
ATOM    137  C2'  DT A   5     -21.086  -1.962 -23.250  1.00  0.00           C  
ATOM    138  C1'  DT A   5     -20.254  -1.887 -24.490  8.00  0.00           C  
ATOM    139  N1   DT A   5     -18.794  -2.196 -24.460  0.00  0.00           N  
ATOM    140  C2   DT A   5     -18.249  -2.897 -25.600  5.00  0.00           C  
ATOM    141  O2   DT A   5     -18.891  -3.317 -26.520  9.00  0.00           O  
ATOM    142  N3   DT A   5     -16.884  -3.132 -25.580  7.00  0.00           N  
ATOM    143  C4   DT A   5     -15.993  -2.555 -24.710  5.00  0.00           C  
ATOM    144  O4   DT A   5     -14.776  -2.494 -25.010  6.00  0.00           O  
ATOM    145  C5   DT A   5     -16.612  -1.868 -23.550  0.00  0.00           C  
ATOM    146  C6   DT A   5     -17.958  -1.712 -23.440  0.00  0.00           C  
ATOM    147  C7   DT A   5     -15.665  -1.239 -22.460  9.00  0.00           C  
ATOM    148  OP1  DT A   5     -22.192   3.661 -22.320  4.00  0.00           O  
ATOM    149  OP2  DT A   5     -20.355   2.697 -20.860  1.00  0.00           O1-
ATOM    150  H3   DT A   5     -16.483  -3.593 -26.460  6.00  0.00           H  
ATOM    151  H6   DT A   5     -18.416  -1.244 -22.640  0.00  0.00           H  
ATOM    152  H1'  DT A   5     -20.787  -2.572 -25.170  4.00  0.00           H  
ATOM    153  H2'  DT A   5     -20.582  -1.372 -22.440  4.00  0.00           H  
ATOM    154  H3'  DT A   5     -23.022  -0.821 -23.020  0.00  0.00           H  
ATOM    155  H4'  DT A   5     -22.286  -0.213 -25.670  6.00  0.00           H  
ATOM    156  H5'  DT A   5     -21.170   1.751 -24.700  1.00  0.00           H  
ATOM    157  H71  DT A   5     -16.260  -0.561 -21.860  4.00  0.00           H  
ATOM    158  H72  DT A   5     -15.145  -2.069 -21.890  2.00  0.00           H  
ATOM    159  H73  DT A   5     -14.962  -0.600 -23.070  5.00  0.00           H  
ATOM    160 H2''  DT A   5     -21.051  -3.015 -23.010  4.00  0.00           H  
ATOM    161 H5''  DT A   5     -22.891   1.603 -24.240  7.00  0.00           H  
ATOM    162  P    DA A   6     -24.158  -3.318 -24.070  2.00  0.00           P  
ATOM    163  C5'  DA A   6     -22.793  -5.231 -24.980  0.00  0.00           C  
ATOM    164  O5'  DA A   6     -23.146  -4.417 -23.850  8.00  0.00           O  
ATOM    165  C4'  DA A   6     -21.697  -6.239 -24.760  2.00  0.00           C  
ATOM    166  O4'  DA A   6     -20.483  -5.614 -24.670  4.00  0.00           O  
ATOM    167  C3'  DA A   6     -21.819  -7.160 -23.560  6.00  0.00           C  
ATOM    168  O3'  DA A   6     -21.764  -8.485 -23.930  0.00  0.00           O  
ATOM    169  C2'  DA A   6     -20.572  -6.822 -22.790  7.00  0.00           C  
ATOM    170  C1'  DA A   6     -19.634  -6.466 -23.980  6.00  0.00           C  
ATOM    171  N1   DA A   6     -14.856  -6.599 -25.520  3.00  0.00           N  
ATOM    172  C2   DA A   6     -15.947  -6.996 -26.110  5.00  0.00           C  
ATOM    173  N3   DA A   6     -17.162  -6.822 -25.630  8.00  0.00           N  
ATOM    174  C4   DA A   6     -17.160  -6.142 -24.470  5.00  0.00           C  
ATOM    175  C5   DA A   6     -16.097  -5.734 -23.750  0.00  0.00           C  
ATOM    176  C6   DA A   6     -14.851  -6.022 -24.370  1.00  0.00           C  
ATOM    177  N6   DA A   6     -13.680  -5.594 -23.980  4.00  0.00           N  
ATOM    178  N7   DA A   6     -16.501  -5.150 -22.520  4.00  0.00           N  
ATOM    179  C8   DA A   6     -17.873  -5.199 -22.640  4.00  0.00           C  
ATOM    180  N9   DA A   6     -18.271  -5.916 -23.750  1.00  0.00           N  
ATOM    181  OP1  DA A   6     -25.020  -3.518 -25.230  0.00  0.00           O  
ATOM    182  OP2  DA A   6     -24.751  -2.936 -22.790  9.00  0.00           O1-
ATOM    183  H2   DA A   6     -15.831  -7.542 -27.020  2.00  0.00           H  
ATOM    184  H8   DA A   6     -18.502  -4.719 -21.900  1.00  0.00           H  
ATOM    185  H1'  DA A   6     -19.468  -7.360 -24.570  6.00  0.00           H  
ATOM    186  H2'  DA A   6     -20.687  -5.906 -22.210  2.00  0.00           H  
ATOM    187  H3'  DA A   6     -22.673  -6.930 -22.960  0.00  0.00           H  
ATOM    188  H4'  DA A   6     -21.739  -6.868 -25.620  8.00  0.00           H  
ATOM    189  H5'  DA A   6     -22.596  -4.568 -25.800  3.00  0.00           H  
ATOM    190  H61  DA A   6     -12.893  -6.122 -24.330  9.00  0.00           H  
ATOM    191  H62  DA A   6     -13.595  -5.103 -23.070  9.00  0.00           H  
ATOM    192 H2''  DA A   6     -20.091  -7.664 -22.140  6.00  0.00           H  
ATOM    193 H5''  DA A   6     -23.688  -5.941 -25.170  4.00  0.00           H  
ATOM    194  P    DG A   7     -22.702  -9.547 -22.950  3.00  0.00           P  
ATOM    195  C5'  DG A   7     -22.405 -11.390 -24.780  9.00  0.00           C  
ATOM    196  O5'  DG A   7     -22.044 -10.855 -23.520  4.00  0.00           O  
ATOM    197  C4'  DG A   7     -21.389 -12.396 -25.340  1.00  0.00           C  
ATOM    198  O4'  DG A   7     -20.066 -11.771 -25.450  4.00  0.00           O  
ATOM    199  C3'  DG A   7     -21.211 -13.626 -24.470  6.00  0.00           C  
ATOM    200  O3'  DG A   7     -20.872 -14.668 -25.350  1.00  0.00           O  
ATOM    201  C2'  DG A   7     -20.074 -13.170 -23.600  4.00  0.00           C  
ATOM    202  C1'  DG A   7     -19.185 -12.281 -24.470  8.00  0.00           C  
ATOM    203  N1   DG A   7     -14.726  -9.627 -24.410  0.00  0.00           N  
ATOM    204  C2   DG A   7     -15.107 -10.622 -25.240  8.00  0.00           C  
ATOM    205  N2   DG A   7     -14.377 -10.915 -26.320  5.00  0.00           N  
ATOM    206  N3   DG A   7     -16.282 -11.257 -25.180  3.00  0.00           N  
ATOM    207  C4   DG A   7     -17.090 -10.791 -24.130  5.00  0.00           C  
ATOM    208  C5   DG A   7     -16.812  -9.803 -23.220  8.00  0.00           C  
ATOM    209  C6   DG A   7     -15.469  -9.306 -23.280  2.00  0.00           C  
ATOM    210  O6   DG A   7     -14.842  -8.650 -22.470  9.00  0.00           O  
ATOM    211  N7   DG A   7     -17.885  -9.601 -22.350  6.00  0.00           N  
ATOM    212  C8   DG A   7     -18.815 -10.426 -22.780  4.00  0.00           C  
ATOM    213  N9   DG A   7     -18.406 -11.153 -23.840  1.00  0.00           N  
ATOM    214  OP1  DG A   7     -24.138  -9.504 -23.360  8.00  0.00           O  
ATOM    215  OP2  DG A   7     -22.311  -9.420 -21.540  8.00  0.00           O1-
ATOM    216  H1   DG A   7     -13.779  -9.131 -24.500  5.00  0.00           H  
ATOM    217  H8   DG A   7     -19.777 -10.401 -22.400  3.00  0.00           H  
ATOM    218  H1'  DG A   7     -18.472 -12.998 -24.870  7.00  0.00           H  
ATOM    219  H2'  DG A   7     -20.453 -12.595 -22.790  1.00  0.00           H  
ATOM    220  H21  DG A   7     -13.408 -10.550 -26.300  7.00  0.00           H  
ATOM    221  H3'  DG A   7     -22.138 -13.823 -23.970  9.00  0.00           H  
ATOM    222  H22  DG A   7     -14.655 -11.708 -26.860  5.00  0.00           H  
ATOM    223  H4'  DG A   7     -21.803 -12.767 -26.240  7.00  0.00           H  
ATOM    224  H5'  DG A   7     -22.506 -10.551 -25.490  5.00  0.00           H  
ATOM    225 H2''  DG A   7     -19.601 -13.942 -23.110  4.00  0.00           H  
ATOM    226 H5''  DG A   7     -23.347 -11.970 -24.750  7.00  0.00           H  
ATOM    227  P    DG A   8     -20.174 -16.113 -24.800  8.00  0.00           P  
ATOM    228  C5'  DG A   8     -17.985 -15.812 -26.160  8.00  0.00           C  
ATOM    229  O5'  DG A   8     -18.652 -15.984 -24.920  4.00  0.00           O  
ATOM    230  C4'  DG A   8     -16.430 -15.898 -26.110  6.00  0.00           C  
ATOM    231  O4'  DG A   8     -15.802 -14.712 -25.590  0.00  0.00           O  
ATOM    232  C3'  DG A   8     -15.933 -17.077 -25.350  2.00  0.00           C  
ATOM    233  O3'  DG A   8     -14.912 -17.625 -26.140  1.00  0.00           O  
ATOM    234  C2'  DG A   8     -15.411 -16.427 -24.080  0.00  0.00           C  
ATOM    235  C1'  DG A   8     -14.832 -15.112 -24.590  1.00  0.00           C  
ATOM    236  N1   DG A   8     -12.125 -11.530 -22.120  9.00  0.00           N  
ATOM    237  C2   DG A   8     -11.768 -12.234 -23.200  7.00  0.00           C  
ATOM    238  N2   DG A   8     -10.514 -12.189 -23.540  3.00  0.00           N  
ATOM    239  N3   DG A   8     -12.542 -13.119 -23.840  1.00  0.00           N  
ATOM    240  C4   DG A   8     -13.805 -13.147 -23.310  2.00  0.00           C  
ATOM    241  C5   DG A   8     -14.322 -12.344 -22.290  5.00  0.00           C  
ATOM    242  C6   DG A   8     -13.364 -11.500 -21.550  7.00  0.00           C  
ATOM    243  O6   DG A   8     -13.560 -10.908 -20.490  4.00  0.00           O  
ATOM    244  N7   DG A   8     -15.616 -12.732 -21.930  0.00  0.00           N  
ATOM    245  C8   DG A   8     -15.874 -13.765 -22.730  3.00  0.00           C  
ATOM    246  N9   DG A   8     -14.846 -14.019 -23.600  1.00  0.00           N  
ATOM    247  OP1  DG A   8     -20.709 -17.153 -25.700  9.00  0.00           O  
ATOM    248  OP2  DG A   8     -20.555 -16.344 -23.430  1.00  0.00           O1-
ATOM    249  H1   DG A   8     -11.341 -11.032 -21.680  4.00  0.00           H  
ATOM    250  H8   DG A   8     -16.786 -14.338 -22.760  6.00  0.00           H  
ATOM    251  H1'  DG A   8     -13.860 -15.245 -25.000  6.00  0.00           H  
ATOM    252  H2'  DG A   8     -16.081 -16.271 -23.320  8.00  0.00           H  
ATOM    253  H21  DG A   8      -9.888 -11.536 -23.200  5.00  0.00           H  
ATOM    254  H3'  DG A   8     -16.776 -17.736 -25.160  6.00  0.00           H  
ATOM    255  H22  DG A   8     -10.184 -12.781 -24.240  4.00  0.00           H  
ATOM    256  H4'  DG A   8     -16.060 -16.089 -27.140  6.00  0.00           H  
ATOM    257  H5'  DG A   8     -18.082 -14.787 -26.480  2.00  0.00           H  
ATOM    258 H2''  DG A   8     -14.597 -16.937 -23.560  9.00  0.00           H  
ATOM    259 H5''  DG A   8     -18.255 -16.521 -26.880  7.00  0.00           H  
ATOM    260  P    DG A   9     -13.898 -18.784 -25.670  6.00  0.00           P  
ATOM    261  C5'  DG A   9     -11.608 -17.468 -25.650  3.00  0.00           C  
ATOM    262  O5'  DG A   9     -12.652 -18.125 -24.920  6.00  0.00           O  
ATOM    263  C4'  DG A   9     -10.487 -16.959 -24.740  3.00  0.00           C  
ATOM    264  O4'  DG A   9     -11.072 -15.881 -24.030  7.00  0.00           O  
ATOM    265  C3'  DG A   9      -9.880 -17.998 -23.750  5.00  0.00           C  
ATOM    266  O3'  DG A   9      -8.463 -18.144 -23.930  8.00  0.00           O  
ATOM    267  C2'  DG A   9     -10.225 -17.315 -22.440  8.00  0.00           C  
ATOM    268  C1'  DG A   9     -10.425 -15.828 -22.810  6.00  0.00           C  
ATOM    269  N1   DG A   9     -10.336 -12.682 -18.630  5.00  0.00           N  
ATOM    270  C2   DG A   9      -9.333 -13.161 -19.460  4.00  0.00           C  
ATOM    271  N2   DG A   9      -8.151 -12.889 -19.050  9.00  0.00           N  
ATOM    272  N3   DG A   9      -9.453 -13.931 -20.560  1.00  0.00           N  
ATOM    273  C4   DG A   9     -10.781 -14.295 -20.740  3.00  0.00           C  
ATOM    274  C5   DG A   9     -11.813 -14.035 -19.880  8.00  0.00           C  
ATOM    275  C6   DG A   9     -11.627 -13.064 -18.800  4.00  0.00           C  
ATOM    276  O6   DG A   9     -12.408 -12.651 -18.020  7.00  0.00           O  
ATOM    277  N7   DG A   9     -12.942 -14.734 -20.320  5.00  0.00           N  
ATOM    278  C8   DG A   9     -12.509 -15.428 -21.360  1.00  0.00           C  
ATOM    279  N9   DG A   9     -11.229 -15.179 -21.730  5.00  0.00           N  
ATOM    280  OP1  DG A   9     -13.438 -19.535 -26.840  3.00  0.00           O  
ATOM    281  OP2  DG A   9     -14.582 -19.559 -24.610  2.00  0.00           O1-
ATOM    282  H1   DG A   9     -10.058 -12.252 -17.760  9.00  0.00           H  
ATOM    283  H8   DG A   9     -13.121 -16.153 -21.940  5.00  0.00           H  
ATOM    284  H1'  DG A   9      -9.486 -15.293 -22.890  2.00  0.00           H  
ATOM    285  H2'  DG A   9     -11.186 -17.672 -22.040  1.00  0.00           H  
ATOM    286  H21  DG A   9      -8.020 -12.431 -18.150  0.00  0.00           H  
ATOM    287  H3'  DG A   9     -10.396 -18.940 -23.850  4.00  0.00           H  
ATOM    288  H22  DG A   9      -7.407 -13.060 -19.730  3.00  0.00           H  
ATOM    289  H4'  DG A   9      -9.688 -16.602 -25.300  3.00  0.00           H  
ATOM    290  H5'  DG A   9     -12.108 -16.669 -26.260  4.00  0.00           H  
ATOM    291 H2''  DG A   9      -9.399 -17.411 -21.770  1.00  0.00           H  
ATOM    292 H5''  DG A   9     -11.164 -18.150 -26.410  4.00  0.00           H  
ATOM    293  P    DT A  10      -7.554 -19.191 -23.220  0.00  0.00           P  
ATOM    294  C5'  DT A  10      -6.088 -17.148 -22.270  6.00  0.00           C  
ATOM    295  O5'  DT A  10      -6.796 -18.421 -22.010  2.00  0.00           O  
ATOM    296  C4'  DT A  10      -5.504 -16.534 -21.020  8.00  0.00           C  
ATOM    297  O4'  DT A  10      -6.529 -15.919 -20.290  5.00  0.00           O  
ATOM    298  C3'  DT A  10      -4.892 -17.592 -20.130  8.00  0.00           C  
ATOM    299  O3'  DT A  10      -3.572 -17.196 -19.690  0.00  0.00           O  
ATOM    300  C2'  DT A  10      -5.842 -17.603 -18.910  8.00  0.00           C  
ATOM    301  C1'  DT A  10      -6.292 -16.160 -18.910  7.00  0.00           C  
ATOM    302  N1   DT A  10      -7.480 -16.066 -18.060  9.00  0.00           N  
ATOM    303  C2   DT A  10      -7.536 -15.161 -16.980  6.00  0.00           C  
ATOM    304  O2   DT A  10      -6.580 -14.483 -16.690  4.00  0.00           O  
ATOM    305  N3   DT A  10      -8.753 -14.950 -16.410  9.00  0.00           N  
ATOM    306  C4   DT A  10      -9.926 -15.596 -16.770  2.00  0.00           C  
ATOM    307  O4   DT A  10     -11.024 -15.111 -16.480  3.00  0.00           O  
ATOM    308  C5   DT A  10      -9.784 -16.639 -17.760  4.00  0.00           C  
ATOM    309  C6   DT A  10      -8.560 -16.879 -18.360  7.00  0.00           C  
ATOM    310  C7   DT A  10     -11.024 -17.352 -18.400  1.00  0.00           C  
ATOM    311  OP1  DT A  10      -6.617 -19.466 -24.250  7.00  0.00           O  
ATOM    312  OP2  DT A  10      -8.370 -20.332 -22.670  5.00  0.00           O1-
ATOM    313  H3   DT A  10      -8.780 -14.131 -15.840  9.00  0.00           H  
ATOM    314  H6   DT A  10      -8.587 -17.496 -19.190  3.00  0.00           H  
ATOM    315  H1'  DT A  10      -5.419 -15.596 -18.520  7.00  0.00           H  
ATOM    316  H2'  DT A  10      -6.544 -18.370 -19.220  0.00  0.00           H  
ATOM    317  H3'  DT A  10      -4.890 -18.602 -20.610  9.00  0.00           H  
ATOM    318  H4'  DT A  10      -4.840 -15.758 -21.180  9.00  0.00           H  
ATOM    319  H5'  DT A  10      -6.801 -16.517 -22.720  7.00  0.00           H  
ATOM    320  H71  DT A  10     -11.881 -16.683 -18.680  1.00  0.00           H  
ATOM    321  H72  DT A  10     -10.775 -17.964 -19.220  6.00  0.00           H  
ATOM    322  H73  DT A  10     -11.345 -17.993 -17.610  3.00  0.00           H  
ATOM    323 H2''  DT A  10      -5.327 -17.914 -17.970  0.00  0.00           H  
ATOM    324 H5''  DT A  10      -5.208 -17.345 -22.930  5.00  0.00           H  
ATOM    325  P    DT A  11      -2.627 -18.092 -18.690  7.00  0.00           P  
ATOM    326  C5'  DT A  11      -2.879 -16.223 -16.990  7.00  0.00           C  
ATOM    327  O5'  DT A  11      -2.954 -17.620 -17.270  2.00  0.00           O  
ATOM    328  C4'  DT A  11      -2.940 -16.000 -15.460  2.00  0.00           C  
ATOM    329  O4'  DT A  11      -4.302 -16.207 -15.160  6.00  0.00           O  
ATOM    330  C3'  DT A  11      -2.072 -16.930 -14.580  1.00  0.00           C  
ATOM    331  O3'  DT A  11      -1.509 -16.156 -13.530  0.00  0.00           O  
ATOM    332  C2'  DT A  11      -3.220 -17.890 -14.120  7.00  0.00           C  
ATOM    333  C1'  DT A  11      -4.405 -16.878 -13.920  0.00  0.00           C  
ATOM    334  N1   DT A  11      -5.707 -17.500 -13.830  9.00  0.00           N  
ATOM    335  C2   DT A  11      -6.534 -17.030 -12.840  6.00  0.00           C  
ATOM    336  O2   DT A  11      -6.285 -16.000 -12.150  3.00  0.00           O  
ATOM    337  N3   DT A  11      -7.728 -17.680 -12.620  6.00  0.00           N  
ATOM    338  C4   DT A  11      -8.291 -18.638 -13.450  6.00  0.00           C  
ATOM    339  O4   DT A  11      -9.480 -18.930 -13.150  9.00  0.00           O  
ATOM    340  C5   DT A  11      -7.453 -19.049 -14.560  4.00  0.00           C  
ATOM    341  C6   DT A  11      -6.156 -18.525 -14.670  5.00  0.00           C  
ATOM    342  C7   DT A  11      -8.048 -19.906 -15.650  5.00  0.00           C  
ATOM    343  OP1  DT A  11      -1.194 -17.687 -18.750  5.00  0.00           O  
ATOM    344  OP2  DT A  11      -3.036 -19.514 -18.750  6.00  0.00           O1-
ATOM    345  H3   DT A  11      -8.350 -17.158 -11.980  3.00  0.00           H  
ATOM    346  H6   DT A  11      -5.458 -18.870 -15.400  3.00  0.00           H  
ATOM    347  H1'  DT A  11      -4.279 -16.210 -13.060  5.00  0.00           H  
ATOM    348  H2'  DT A  11      -3.437 -18.607 -14.960  6.00  0.00           H  
ATOM    349  H3'  DT A  11      -1.334 -17.578 -15.090  4.00  0.00           H  
ATOM    350  H4'  DT A  11      -2.586 -14.972 -15.230  2.00  0.00           H  
ATOM    351  H5'  DT A  11      -3.680 -15.557 -17.400  5.00  0.00           H  
ATOM    352  H71  DT A  11      -7.459 -19.875 -16.540  4.00  0.00           H  
ATOM    353  H72  DT A  11      -8.268 -20.897 -15.290  0.00  0.00           H  
ATOM    354  H73  DT A  11      -9.018 -19.494 -15.890  4.00  0.00           H  
ATOM    355 H2''  DT A  11      -2.936 -18.478 -13.260  6.00  0.00           H  
ATOM    356 H5''  DT A  11      -2.029 -15.789 -17.350  2.00  0.00           H  
ATOM    357  P    DA A  12      -0.401 -16.608 -12.460  2.00  0.00           P  
ATOM    358  C5'  DA A  12      -1.939 -16.232 -10.300  3.00  0.00           C  
ATOM    359  O5'  DA A  12      -1.271 -17.132 -11.230  8.00  0.00           O  
ATOM    360  C4'  DA A  12      -3.051 -16.741  -9.500  4.00  0.00           C  
ATOM    361  O4'  DA A  12      -4.047 -17.345 -10.290  0.00  0.00           O  
ATOM    362  C3'  DA A  12      -2.548 -17.784  -8.470  3.00  0.00           C  
ATOM    363  O3'  DA A  12      -3.084 -17.561  -7.160  2.00  0.00           O  
ATOM    364  C2'  DA A  12      -3.137 -19.004  -9.060  8.00  0.00           C  
ATOM    365  C1'  DA A  12      -4.539 -18.487  -9.570  3.00  0.00           C  
ATOM    366  N1   DA A  12      -8.905 -21.167 -10.660  9.00  0.00           N  
ATOM    367  C2   DA A  12      -8.636 -20.349  -9.680  6.00  0.00           C  
ATOM    368  N3   DA A  12      -7.458 -19.751  -9.470  3.00  0.00           N  
ATOM    369  C4   DA A  12      -6.466 -19.998 -10.370  3.00  0.00           C  
ATOM    370  C5   DA A  12      -6.578 -20.922 -11.350  7.00  0.00           C  
ATOM    371  C6   DA A  12      -7.866 -21.522 -11.500  3.00  0.00           C  
ATOM    372  N6   DA A  12      -8.150 -22.368 -12.470  1.00  0.00           N  
ATOM    373  N7   DA A  12      -5.364 -21.108 -11.990  7.00  0.00           N  
ATOM    374  C8   DA A  12      -4.589 -20.216 -11.450  5.00  0.00           C  
ATOM    375  N9   DA A  12      -5.162 -19.536 -10.430  7.00  0.00           N  
ATOM    376  OP1  DA A  12       0.370 -15.422 -12.030  5.00  0.00           O  
ATOM    377  OP2  DA A  12       0.320 -17.740 -13.040  5.00  0.00           O1-
ATOM    378  H2   DA A  12      -9.445 -20.102  -9.000  3.00  0.00           H  
ATOM    379  H8   DA A  12      -3.546 -20.143 -11.700  0.00  0.00           H  
ATOM    380  H1'  DA A  12      -5.194 -18.148  -8.770  1.00  0.00           H  
ATOM    381  H2'  DA A  12      -2.501 -19.223  -9.860  2.00  0.00           H  
ATOM    382  H3'  DA A  12      -1.468 -17.906  -8.490  9.00  0.00           H  
ATOM    383  H4'  DA A  12      -3.423 -15.900  -8.880  7.00  0.00           H  
ATOM    384  H5'  DA A  12      -2.412 -15.532 -10.930  3.00  0.00           H  
ATOM    385  H61  DA A  12      -9.077 -22.666 -12.650  9.00  0.00           H  
ATOM    386  H62  DA A  12      -7.504 -22.598 -13.230  8.00  0.00           H  
ATOM    387 H2''  DA A  12      -3.311 -19.783  -8.340  4.00  0.00           H  
ATOM    388 H5''  DA A  12      -1.047 -15.778  -9.680  9.00  0.00           H  
ATOM    389  P    DG A  13      -2.312 -17.950  -5.830  5.00  0.00           P  
ATOM    390  C5'  DG A  13       0.043 -16.965  -6.470  8.00  0.00           C  
ATOM    391  O5'  DG A  13      -1.143 -16.936  -5.610  0.00  0.00           O  
ATOM    392  C4'  DG A  13       1.014 -15.903  -6.070  8.00  0.00           C  
ATOM    393  O4'  DG A  13       0.437 -14.623  -6.160  2.00  0.00           O  
ATOM    394  C3'  DG A  13       1.531 -16.189  -4.670  9.00  0.00           C  
ATOM    395  O3'  DG A  13       2.628 -17.093  -4.570  5.00  0.00           O  
ATOM    396  C2'  DG A  13       1.863 -14.803  -4.310  6.00  0.00           C  
ATOM    397  C1'  DG A  13       0.794 -13.896  -5.020  5.00  0.00           C  
ATOM    398  N1   DG A  13      -0.976 -11.669  -0.840  4.00  0.00           N  
ATOM    399  C2   DG A  13       0.247 -11.624  -1.400  1.00  0.00           C  
ATOM    400  N2   DG A  13       1.127 -10.925  -0.780  5.00  0.00           N  
ATOM    401  N3   DG A  13       0.601 -12.191  -2.480  4.00  0.00           N  
ATOM    402  C4   DG A  13      -0.462 -12.802  -3.160  6.00  0.00           C  
ATOM    403  C5   DG A  13      -1.809 -12.843  -2.740  7.00  0.00           C  
ATOM    404  C6   DG A  13      -2.108 -12.124  -1.520  2.00  0.00           C  
ATOM    405  O6   DG A  13      -3.168 -11.969  -0.870  7.00  0.00           O  
ATOM    406  N7   DG A  13      -2.634 -13.697  -3.590  9.00  0.00           N  
ATOM    407  C8   DG A  13      -1.755 -14.075  -4.460  2.00  0.00           C  
ATOM    408  N9   DG A  13      -0.400 -13.625  -4.210  7.00  0.00           N  
ATOM    409  OP1  DG A  13      -1.647 -19.257  -6.060  2.00  0.00           O  
ATOM    410  OP2  DG A  13      -3.227 -17.826  -4.740  6.00  0.00           O1-
ATOM    411  H1   DG A  13      -1.089 -11.166   0.050  3.00  0.00           H  
ATOM    412  H8   DG A  13      -1.891 -14.787  -5.260  5.00  0.00           H  
ATOM    413  H1'  DG A  13       1.166 -12.862  -5.260  5.00  0.00           H  
ATOM    414  H2'  DG A  13       1.794 -14.561  -3.230  2.00  0.00           H  
ATOM    415  H21  DG A  13       0.924 -10.579   0.180  2.00  0.00           H  
ATOM    416  H3'  DG A  13       0.682 -16.605  -4.170  6.00  0.00           H  
ATOM    417  H22  DG A  13       1.946 -10.785  -1.240  5.00  0.00           H  
ATOM    418  H4'  DG A  13       1.819 -15.942  -6.800  3.00  0.00           H  
ATOM    419  H5'  DG A  13      -0.249 -16.851  -7.530  2.00  0.00           H  
ATOM    420 H2''  DG A  13       2.913 -14.541  -4.660  4.00  0.00           H  
ATOM    421 H5''  DG A  13       0.554 -17.872  -6.330  4.00  0.00           H  
ATOM    422  P    DG A  14       2.758 -18.105  -3.310  6.00  0.00           P  
ATOM    423  C5'  DG A  14       3.253 -17.474  -0.760  7.00  0.00           C  
ATOM    424  O5'  DG A  14       3.012 -17.084  -2.120  9.00  0.00           O  
ATOM    425  C4'  DG A  14       3.299 -16.320   0.180  0.00  0.00           C  
ATOM    426  O4'  DG A  14       1.941 -15.966   0.470  8.00  0.00           O  
ATOM    427  C3'  DG A  14       3.959 -15.100  -0.350  9.00  0.00           C  
ATOM    428  O3'  DG A  14       5.348 -14.782  -0.010  3.00  0.00           O  
ATOM    429  C2'  DG A  14       3.178 -14.002   0.470  8.00  0.00           C  
ATOM    430  C1'  DG A  14       1.753 -14.562   0.420  1.00  0.00           C  
ATOM    431  N1   DG A  14      -3.237 -14.222   1.880  0.00  0.00           N  
ATOM    432  C2   DG A  14      -2.645 -14.920   0.860  5.00  0.00           C  
ATOM    433  N2   DG A  14      -3.422 -15.485   0.050  3.00  0.00           N  
ATOM    434  N3   DG A  14      -1.325 -14.995   0.600  5.00  0.00           N  
ATOM    435  C4   DG A  14      -0.587 -14.264   1.540  3.00  0.00           C  
ATOM    436  C5   DG A  14      -1.066 -13.375   2.510  1.00  0.00           C  
ATOM    437  C6   DG A  14      -2.505 -13.333   2.660  7.00  0.00           C  
ATOM    438  O6   DG A  14      -3.147 -12.525   3.310  8.00  0.00           O  
ATOM    439  N7   DG A  14       0.026 -12.807   3.200  9.00  0.00           N  
ATOM    440  C8   DG A  14       1.073 -13.288   2.500  5.00  0.00           C  
ATOM    441  N9   DG A  14       0.791 -14.079   1.450  6.00  0.00           N  
ATOM    442  OP1  DG A  14       4.032 -18.907  -3.550  1.00  0.00           O  
ATOM    443  OP2  DG A  14       1.427 -18.688  -3.160  3.00  0.00           O1-
ATOM    444  H1   DG A  14      -4.233 -14.352   1.980  0.00  0.00           H  
ATOM    445  H8   DG A  14       2.077 -13.148   2.850  7.00  0.00           H  
ATOM    446  H1'  DG A  14       1.387 -14.361  -0.600  3.00  0.00           H  
ATOM    447  H2'  DG A  14       3.649 -13.945   1.470  3.00  0.00           H  
ATOM    448  H21  DG A  14      -4.433 -15.719   0.320  1.00  0.00           H  
ATOM    449  H3'  DG A  14       3.845 -14.932  -1.420  8.00  0.00           H  
ATOM    450  H22  DG A  14      -2.992 -15.965  -0.730  7.00  0.00           H  
ATOM    451  H4'  DG A  14       3.659 -16.672   1.080  8.00  0.00           H  
ATOM    452  H5'  DG A  14       4.161 -18.082  -0.720  4.00  0.00           H  
ATOM    453 H2''  DG A  14       3.236 -13.065  -0.000  1.00  0.00           H  
ATOM    454 H5''  DG A  14       2.417 -18.137  -0.560  1.00  0.00           H  
ATOM    455  P    DG A  15       6.377 -15.555   0.900  6.00  0.00           P  
ATOM    456  C5'  DG A  15       6.182 -14.013   2.930  7.00  0.00           C  
ATOM    457  O5'  DG A  15       5.972 -15.244   2.350  3.00  0.00           O  
ATOM    458  C4'  DG A  15       5.469 -13.982   4.270  1.00  0.00           C  
ATOM    459  O4'  DG A  15       4.115 -14.282   4.110  8.00  0.00           O  
ATOM    460  C3'  DG A  15       5.963 -15.008   5.260  4.00  0.00           C  
ATOM    461  O3'  DG A  15       6.103 -14.405   6.550  5.00  0.00           O  
ATOM    462  C2'  DG A  15       4.801 -16.037   5.250  3.00  0.00           C  
ATOM    463  C1'  DG A  15       3.644 -15.136   5.150  5.00  0.00           C  
ATOM    464  N1   DG A  15      -1.442 -15.078   6.180  3.00  0.00           N  
ATOM    465  C2   DG A  15      -0.396 -14.286   6.640  7.00  0.00           C  
ATOM    466  N2   DG A  15      -0.576 -13.264   7.500  4.00  0.00           N  
ATOM    467  N3   DG A  15       0.875 -14.324   6.240  0.00  0.00           N  
ATOM    468  C4   DG A  15       1.095 -15.271   5.330  8.00  0.00           C  
ATOM    469  C5   DG A  15       0.155 -16.032   4.730  4.00  0.00           C  
ATOM    470  C6   DG A  15      -1.242 -15.988   5.210  3.00  0.00           C  
ATOM    471  O6   DG A  15      -2.165 -16.696   4.890  5.00  0.00           O  
ATOM    472  N7   DG A  15       0.677 -16.820   3.710  6.00  0.00           N  
ATOM    473  C8   DG A  15       1.950 -16.537   3.770  2.00  0.00           C  
ATOM    474  N9   DG A  15       2.302 -15.687   4.850  2.00  0.00           N  
ATOM    475  OP1  DG A  15       7.727 -14.994   0.540  0.00  0.00           O  
ATOM    476  OP2  DG A  15       6.234 -16.976   0.620  6.00  0.00           O1-
ATOM    477  H1   DG A  15      -2.360 -14.956   6.640  5.00  0.00           H  
ATOM    478  H8   DG A  15       2.635 -17.122   3.190  4.00  0.00           H  
ATOM    479  H1'  DG A  15       3.610 -14.518   6.070  8.00  0.00           H  
ATOM    480  H2'  DG A  15       4.834 -16.638   4.380  4.00  0.00           H  
ATOM    481  H21  DG A  15      -1.483 -12.936   7.770  9.00  0.00           H  
ATOM    482  H3'  DG A  15       6.873 -15.462   4.970  8.00  0.00           H  
ATOM    483  H22  DG A  15       0.244 -12.690   7.720  3.00  0.00           H  
ATOM    484  H4'  DG A  15       5.511 -12.999   4.690  6.00  0.00           H  
ATOM    485  H5'  DG A  15       5.805 -13.247   2.310  6.00  0.00           H  
ATOM    486 H2''  DG A  15       4.682 -16.618   6.200  4.00  0.00           H  
ATOM    487 H5''  DG A  15       7.245 -13.874   3.170  0.00  0.00           H  
ATOM    488  P    DT A  16       7.509 -13.688   6.920  0.00  0.00           P  
ATOM    489  C5'  DT A  16       6.211 -11.444   7.250  4.00  0.00           C  
ATOM    490  O5'  DT A  16       7.153 -12.379   7.800  7.00  0.00           O  
ATOM    491  C4'  DT A  16       5.071 -11.136   8.250  9.00  0.00           C  
ATOM    492  O4'  DT A  16       4.352 -10.116   7.620  7.00  0.00           O  
ATOM    493  C3'  DT A  16       4.147 -12.303   8.680  6.00  0.00           C  
ATOM    494  O3'  DT A  16       3.758 -12.403   9.980  5.00  0.00           O  
ATOM    495  C2'  DT A  16       2.968 -12.071   7.770  1.00  0.00           C  
ATOM    496  C1'  DT A  16       3.038 -10.613   7.390  4.00  0.00           C  
ATOM    497  N1   DT A  16       2.629 -10.402   5.940  7.00  0.00           N  
ATOM    498  C2   DT A  16       1.330 -10.003   5.580  6.00  0.00           C  
ATOM    499  O2   DT A  16       0.496  -9.769   6.470  8.00  0.00           O  
ATOM    500  N3   DT A  16       1.052  -9.884   4.230  5.00  0.00           N  
ATOM    501  C4   DT A  16       1.933 -10.020   3.180  4.00  0.00           C  
ATOM    502  O4   DT A  16       1.560  -9.964   2.020  4.00  0.00           O  
ATOM    503  C5   DT A  16       3.290 -10.370   3.590  6.00  0.00           C  
ATOM    504  C6   DT A  16       3.585 -10.567   4.910  7.00  0.00           C  
ATOM    505  C7   DT A  16       4.363 -10.616   2.480  6.00  0.00           C  
ATOM    506  OP1  DT A  16       8.073 -13.189   5.590  2.00  0.00           O  
ATOM    507  OP2  DT A  16       8.212 -14.744   7.730  1.00  0.00           O1-
ATOM    508  H3   DT A  16       0.146  -9.628   3.940  5.00  0.00           H  
ATOM    509  H6   DT A  16       4.608 -10.830   5.180  2.00  0.00           H  
ATOM    510  H1'  DT A  16       2.387  -9.985   7.970  8.00  0.00           H  
ATOM    511  H2'  DT A  16       3.139 -12.719   6.910  0.00  0.00           H  
ATOM    512  H3'  DT A  16       4.675 -13.160   8.400  4.00  0.00           H  
ATOM    513  H4'  DT A  16       5.428 -10.635   9.170  5.00  0.00           H  
ATOM    514  H5'  DT A  16       5.754 -11.927   6.370  4.00  0.00           H  
ATOM    515  H71  DT A  16       5.291 -10.948   2.980  0.00  0.00           H  
ATOM    516  H72  DT A  16       4.029 -11.312   1.710  3.00  0.00           H  
ATOM    517  H73  DT A  16       4.505  -9.758   1.860  4.00  0.00           H  
ATOM    518 H2''  DT A  16       2.053 -12.321   8.320  1.00  0.00           H  
ATOM    519 H5''  DT A  16       6.727 -10.468   7.120  1.00  0.00           H  
ATOM    520  P    DT A  17       3.944 -13.768  10.740  3.00  0.00           P  
ATOM    521  C5'  DT A  17       2.673 -15.326   9.080  1.00  0.00           C  
ATOM    522  O5'  DT A  17       2.634 -14.601  10.290  7.00  0.00           O  
ATOM    523  C4'  DT A  17       1.467 -16.232   8.930  9.00  0.00           C  
ATOM    524  O4'  DT A  17       1.296 -16.901   7.700  0.00  0.00           O  
ATOM    525  C3'  DT A  17       1.498 -17.331   9.940  2.00  0.00           C  
ATOM    526  O3'  DT A  17       0.513 -17.027  10.820  5.00  0.00           O  
ATOM    527  C2'  DT A  17       1.238 -18.546   9.100  6.00  0.00           C  
ATOM    528  C1'  DT A  17       0.477 -18.093   7.920  1.00  0.00           C  
ATOM    529  N1   DT A  17       0.474 -18.916   6.690  4.00  0.00           N  
ATOM    530  C2   DT A  17      -0.797 -19.358   6.220  8.00  0.00           C  
ATOM    531  O2   DT A  17      -1.877 -19.162   6.850  0.00  0.00           O  
ATOM    532  N3   DT A  17      -0.800 -19.984   4.990  8.00  0.00           N  
ATOM    533  C4   DT A  17       0.306 -20.274   4.240  4.00  0.00           C  
ATOM    534  O4   DT A  17       0.139 -20.707   3.110  3.00  0.00           O  
ATOM    535  C5   DT A  17       1.537 -19.867   4.870  6.00  0.00           C  
ATOM    536  C6   DT A  17       1.603 -19.282   6.080  1.00  0.00           C  
ATOM    537  C7   DT A  17       2.863 -20.183   4.210  6.00  0.00           C  
ATOM    538  OP1  DT A  17       3.814 -13.521  12.170  9.00  0.00           O  
ATOM    539  OP2  DT A  17       5.161 -14.505  10.240  4.00  0.00           O1-
ATOM    540  H3   DT A  17      -1.708 -20.341   4.810  8.00  0.00           H  
ATOM    541  H6   DT A  17       2.609 -19.015   6.480  3.00  0.00           H  
ATOM    542  H1'  DT A  17      -0.570 -17.853   8.270  1.00  0.00           H  
ATOM    543  H2'  DT A  17       2.168 -18.931   8.800  8.00  0.00           H  
ATOM    544  H3'  DT A  17       2.452 -17.436  10.400  7.00  0.00           H  
ATOM    545  H4'  DT A  17       0.533 -15.633   9.250  7.00  0.00           H  
ATOM    546  H5'  DT A  17       3.574 -15.894   9.000  1.00  0.00           H  
ATOM    547  H71  DT A  17       3.738 -19.799   4.810  8.00  0.00           H  
ATOM    548  H72  DT A  17       2.843 -19.665   3.290  4.00  0.00           H  
ATOM    549  H73  DT A  17       2.902 -21.233   4.080  7.00  0.00           H  
ATOM    550 H2''  DT A  17       0.729 -19.365   9.650  3.00  0.00           H  
ATOM    551 H5''  DT A  17       2.677 -14.683   8.200  0.00  0.00           H  
ATOM    552  P    DA A  18       0.598 -17.573  12.320  9.00  0.00           P  
ATOM    553  C5'  DA A  18      -1.583 -16.684  13.560  6.00  0.00           C  
ATOM    554  O5'  DA A  18      -0.283 -16.459  13.090  2.00  0.00           O  
ATOM    555  C4'  DA A  18      -2.384 -15.382  13.960  6.00  0.00           C  
ATOM    556  O4'  DA A  18      -2.530 -14.682  12.730  8.00  0.00           O  
ATOM    557  C3'  DA A  18      -3.877 -15.637  14.380  4.00  0.00           C  
ATOM    558  O3'  DA A  18      -4.516 -14.460  14.940  1.00  0.00           O  
ATOM    559  C2'  DA A  18      -4.426 -16.025  13.030  1.00  0.00           C  
ATOM    560  C1'  DA A  18      -3.742 -15.086  12.070  1.00  0.00           C  
ATOM    561  N1   DA A  18      -5.927 -17.588   8.130  2.00  0.00           N  
ATOM    562  C2   DA A  18      -6.423 -17.248   9.320  5.00  0.00           C  
ATOM    563  N3   DA A  18      -5.730 -16.640  10.280  3.00  0.00           N  
ATOM    564  C4   DA A  18      -4.423 -16.329   9.990  8.00  0.00           C  
ATOM    565  C5   DA A  18      -3.763 -16.718   8.890  0.00  0.00           C  
ATOM    566  C6   DA A  18      -4.633 -17.341   7.940  7.00  0.00           C  
ATOM    567  N6   DA A  18      -4.216 -17.730   6.730  8.00  0.00           N  
ATOM    568  N7   DA A  18      -2.343 -16.447   9.000  4.00  0.00           N  
ATOM    569  C8   DA A  18      -2.311 -15.759  10.160  0.00  0.00           C  
ATOM    570  N9   DA A  18      -3.504 -15.854  10.850  4.00  0.00           N  
ATOM    571  OP1  DA A  18       1.984 -17.402  12.780  8.00  0.00           O  
ATOM    572  OP2  DA A  18       0.014 -18.880  12.360  2.00  0.00           O1-
ATOM    573  H2   DA A  18      -7.432 -17.532   9.580  5.00  0.00           H  
ATOM    574  H8   DA A  18      -1.382 -15.508  10.550  9.00  0.00           H  
ATOM    575  H1'  DA A  18      -4.379 -14.188  11.930  9.00  0.00           H  
ATOM    576  H2'  DA A  18      -4.289 -17.091  12.900  8.00  0.00           H  
ATOM    577  H3'  DA A  18      -3.905 -16.478  15.130  4.00  0.00           H  
ATOM    578  H4'  DA A  18      -1.886 -14.748  14.670  6.00  0.00           H  
ATOM    579  H5'  DA A  18      -1.620 -17.308  14.420  1.00  0.00           H  
ATOM    580  H61  DA A  18      -4.908 -18.269   6.190  9.00  0.00           H  
ATOM    581  H62  DA A  18      -3.189 -17.695   6.580  4.00  0.00           H  
ATOM    582 H2''  DA A  18      -5.496 -15.749  13.090  5.00  0.00           H  
ATOM    583 H5''  DA A  18      -2.133 -17.185  12.770  8.00  0.00           H  
ATOM    584  P    DG A  19      -5.947 -14.391  15.690  0.00  0.00           P  
ATOM    585  C5'  DG A  19      -7.164 -12.234  14.640  1.00  0.00           C  
ATOM    586  O5'  DG A  19      -6.960 -13.600  14.670  2.00  0.00           O  
ATOM    587  C4'  DG A  19      -5.901 -11.417  14.390  3.00  0.00           C  
ATOM    588  O4'  DG A  19      -4.982 -11.997  13.390  8.00  0.00           O  
ATOM    589  C3'  DG A  19      -6.195 -10.019  13.830  0.00  0.00           C  
ATOM    590  O3'  DG A  19      -5.318  -9.051  14.370  5.00  0.00           O  
ATOM    591  C2'  DG A  19      -6.088 -10.186  12.300  5.00  0.00           C  
ATOM    592  C1'  DG A  19      -4.796 -11.031  12.420  6.00  0.00           C  
ATOM    593  N1   DG A  19      -5.975 -13.816   8.240  7.00  0.00           N  
ATOM    594  C2   DG A  19      -6.789 -13.285   9.170  3.00  0.00           C  
ATOM    595  N2   DG A  19      -8.109 -13.339   8.910  8.00  0.00           N  
ATOM    596  N3   DG A  19      -6.375 -12.538  10.180  3.00  0.00           N  
ATOM    597  C4   DG A  19      -5.056 -12.320  10.210  0.00  0.00           C  
ATOM    598  C5   DG A  19      -4.114 -12.835   9.290  5.00  0.00           C  
ATOM    599  C6   DG A  19      -4.600 -13.636   8.200  3.00  0.00           C  
ATOM    600  O6   DG A  19      -3.942 -14.144   7.260  4.00  0.00           O  
ATOM    601  N7   DG A  19      -2.829 -12.425   9.610  2.00  0.00           N  
ATOM    602  C8   DG A  19      -2.993 -11.698  10.700  9.00  0.00           C  
ATOM    603  N9   DG A  19      -4.289 -11.653  11.180  6.00  0.00           N  
ATOM    604  OP1  DG A  19      -5.792 -13.613  16.950  7.00  0.00           O  
ATOM    605  OP2  DG A  19      -6.441 -15.779  15.760  9.00  0.00           O1-
ATOM    606  H1   DG A  19      -6.472 -14.413   7.580  3.00  0.00           H  
ATOM    607  H8   DG A  19      -2.191 -11.333  11.280  7.00  0.00           H  
ATOM    608  H1'  DG A  19      -4.087 -10.335  12.830  6.00  0.00           H  
ATOM    609  H2'  DG A  19      -6.996 -10.690  11.990  0.00  0.00           H  
ATOM    610  H21  DG A  19      -8.531 -13.654   8.040  5.00  0.00           H  
ATOM    611  H3'  DG A  19      -7.225  -9.727  14.090  7.00  0.00           H  
ATOM    612  H22  DG A  19      -8.512 -12.551   9.300  9.00  0.00           H  
ATOM    613  H4'  DG A  19      -5.403 -11.307  15.300  6.00  0.00           H  
ATOM    614  H5'  DG A  19      -7.509 -11.996  15.650  1.00  0.00           H  
ATOM    615 H2''  DG A  19      -5.825  -9.218  11.860  8.00  0.00           H  
ATOM    616 H5''  DG A  19      -7.830 -11.907  13.840  8.00  0.00           H  
ATOM    617  P    DG A  20      -5.311  -7.491  13.960  7.00  0.00           P  
ATOM    618  C5'  DG A  20      -3.071  -7.288  12.660  2.00  0.00           C  
ATOM    619  O5'  DG A  20      -4.454  -7.363  12.670  6.00  0.00           O  
ATOM    620  C4'  DG A  20      -2.551  -7.161  11.270  0.00  0.00           C  
ATOM    621  O4'  DG A  20      -3.173  -8.260  10.550  0.00  0.00           O  
ATOM    622  C3'  DG A  20      -2.971  -5.861  10.510  9.00  0.00           C  
ATOM    623  O3'  DG A  20      -1.947  -5.379   9.670  9.00  0.00           O  
ATOM    624  C2'  DG A  20      -4.140  -6.394   9.660  7.00  0.00           C  
ATOM    625  C1'  DG A  20      -3.599  -7.825   9.260  4.00  0.00           C  
ATOM    626  N1   DG A  20      -4.282 -11.189   5.480  8.00  0.00           N  
ATOM    627  C2   DG A  20      -3.133 -10.796   6.000  3.00  0.00           C  
ATOM    628  N2   DG A  20      -2.008 -11.128   5.410  4.00  0.00           N  
ATOM    629  N3   DG A  20      -3.034 -10.017   7.060  2.00  0.00           N  
ATOM    630  C4   DG A  20      -4.227  -9.752   7.690  7.00  0.00           C  
ATOM    631  C5   DG A  20      -5.426 -10.292   7.300  0.00  0.00           C  
ATOM    632  C6   DG A  20      -5.494 -11.037   6.100  4.00  0.00           C  
ATOM    633  O6   DG A  20      -6.475 -11.599   5.580  1.00  0.00           O  
ATOM    634  N7   DG A  20      -6.433  -9.787   8.090  9.00  0.00           N  
ATOM    635  C8   DG A  20      -5.837  -8.999   8.940  8.00  0.00           C  
ATOM    636  N9   DG A  20      -4.507  -8.778   8.590  0.00  0.00           N  
ATOM    637  OP1  DG A  20      -4.665  -6.583  15.000  5.00  0.00           O  
ATOM    638  OP2  DG A  20      -6.750  -7.184  13.620  3.00  0.00           O1-
ATOM    639  H1   DG A  20      -4.296 -11.833   4.760  6.00  0.00           H  
ATOM    640  H8   DG A  20      -6.327  -8.554   9.910  1.00  0.00           H  
ATOM    641  H1'  DG A  20      -2.667  -7.758   8.560  2.00  0.00           H  
ATOM    642  H2'  DG A  20      -5.052  -6.501  10.230  4.00  0.00           H  
ATOM    643  H21  DG A  20      -1.941 -11.852   4.720  5.00  0.00           H  
ATOM    644  H3'  DG A  20      -3.251  -5.143  11.320  0.00  0.00           H  
ATOM    645  H22  DG A  20      -1.170 -10.806   5.880  0.00  0.00           H  
ATOM    646  H4'  DG A  20      -1.539  -7.222  11.160  3.00  0.00           H  
ATOM    647  H5'  DG A  20      -2.741  -8.247  13.040  5.00  0.00           H  
ATOM    648 H2''  DG A  20      -4.291  -5.683   8.830  4.00  0.00           H  
ATOM    649 H5''  DG A  20      -2.774  -6.443  13.300  0.00  0.00           H  
ATOM    650  P    DG A  21      -1.745  -3.850   9.160  3.00  0.00           P  
ATOM    651  C5'  DG A  21      -2.523  -3.851   6.670  1.00  0.00           C  
ATOM    652  O5'  DG A  21      -2.855  -3.888   8.040  5.00  0.00           O  
ATOM    653  C4'  DG A  21      -3.702  -3.973   5.660  1.00  0.00           C  
ATOM    654  O4'  DG A  21      -3.318  -4.745   4.600  8.00  0.00           O  
ATOM    655  C3'  DG A  21      -4.927  -4.671   6.200  8.00  0.00           C  
ATOM    656  O3'  DG A  21      -6.109  -4.371   5.410  7.00  0.00           O  
ATOM    657  C2'  DG A  21      -4.513  -6.185   5.980  5.00  0.00           C  
ATOM    658  C1'  DG A  21      -3.996  -6.042   4.560  5.00  0.00           C  
ATOM    659  N1   DG A  21      -3.288  -9.975   1.510  1.00  0.00           N  
ATOM    660  C2   DG A  21      -4.445  -9.461   2.000  0.00  0.00           C  
ATOM    661  N2   DG A  21      -5.590  -9.944   1.530  9.00  0.00           N  
ATOM    662  N3   DG A  21      -4.530  -8.442   2.770  9.00  0.00           N  
ATOM    663  C4   DG A  21      -3.245  -8.022   3.150  3.00  0.00           C  
ATOM    664  C5   DG A  21      -1.988  -8.486   2.820  6.00  0.00           C  
ATOM    665  C6   DG A  21      -2.082  -9.469   1.750  7.00  0.00           C  
ATOM    666  O6   DG A  21      -1.134  -9.905   1.100  4.00  0.00           O  
ATOM    667  N7   DG A  21      -0.970  -7.878   3.590  6.00  0.00           N  
ATOM    668  C8   DG A  21      -1.652  -7.122   4.450  9.00  0.00           C  
ATOM    669  N9   DG A  21      -2.962  -6.989   4.070  6.00  0.00           N  
ATOM    670  OP1  DG A  21      -0.468  -3.714   8.470  9.00  0.00           O  
ATOM    671  OP2  DG A  21      -2.174  -3.015  10.280  1.00  0.00           O1-
ATOM    672  H1   DG A  21      -3.279 -10.668   0.870  2.00  0.00           H  
ATOM    673  H8   DG A  21      -1.185  -6.455   5.160  7.00  0.00           H  
ATOM    674  H1'  DG A  21      -4.809  -5.979   3.830  4.00  0.00           H  
ATOM    675  H2'  DG A  21      -3.695  -6.568   6.690  8.00  0.00           H  
ATOM    676  H21  DG A  21      -5.634 -10.746   1.000  2.00  0.00           H  
ATOM    677  H3'  DG A  21      -5.090  -4.356   7.210  6.00  0.00           H  
ATOM    678  H22  DG A  21      -6.475  -9.608   1.770  7.00  0.00           H  
ATOM    679  H4'  DG A  21      -3.939  -3.030   5.220  2.00  0.00           H  
ATOM    680  H5'  DG A  21      -1.907  -4.699   6.540  0.00  0.00           H  
ATOM    681 H2''  DG A  21      -5.369  -6.877   5.940  4.00  0.00           H  
ATOM    682 H5''  DG A  21      -1.881  -3.027   6.390  3.00  0.00           H  
ATOM    683  P    DT A  22      -7.033  -3.159   5.900  9.00  0.00           P  
ATOM    684  C5'  DT A  22      -9.040  -1.861   4.880  1.00  0.00           C  
ATOM    685  O5'  DT A  22      -7.918  -2.695   4.700  3.00  0.00           O  
ATOM    686  C4'  DT A  22      -9.862  -1.537   3.680  6.00  0.00           C  
ATOM    687  O4'  DT A  22      -8.986  -0.953   2.700  1.00  0.00           O  
ATOM    688  C3'  DT A  22     -10.498  -2.730   2.950  9.00  0.00           C  
ATOM    689  O3'  DT A  22     -11.618  -2.282   2.140  3.00  0.00           O  
ATOM    690  C2'  DT A  22      -9.467  -3.261   1.950  1.00  0.00           C  
ATOM    691  C1'  DT A  22      -8.991  -1.860   1.550  3.00  0.00           C  
ATOM    692  N1   DT A  22      -7.722  -2.053   0.810  5.00  0.00           N  
ATOM    693  C2   DT A  22      -7.586  -1.738  -0.530  2.00  0.00           C  
ATOM    694  O2   DT A  22      -8.504  -1.377  -1.230  6.00  0.00           O  
ATOM    695  N3   DT A  22      -6.354  -1.978  -1.150  0.00  0.00           N  
ATOM    696  C4   DT A  22      -5.246  -2.393  -0.480  7.00  0.00           C  
ATOM    697  O4   DT A  22      -4.217  -2.397  -1.140  0.00  0.00           O  
ATOM    698  C5   DT A  22      -5.388  -2.766   0.930  1.00  0.00           C  
ATOM    699  C6   DT A  22      -6.626  -2.563   1.490  8.00  0.00           C  
ATOM    700  C7   DT A  22      -4.175  -3.245   1.720  2.00  0.00           C  
ATOM    701  OP1  DT A  22      -6.186  -2.047   6.230  3.00  0.00           O  
ATOM    702  OP2  DT A  22      -7.944  -3.689   6.940  2.00  0.00           O1-
ATOM    703  H3   DT A  22      -6.148  -1.421  -1.980  6.00  0.00           H  
ATOM    704  H6   DT A  22      -6.732  -2.747   2.570  6.00  0.00           H  
ATOM    705  H1'  DT A  22      -9.650  -1.403   0.800  5.00  0.00           H  
ATOM    706  H2'  DT A  22      -8.672  -3.825   2.490  5.00  0.00           H  
ATOM    707  H3'  DT A  22     -10.693  -3.496   3.730  0.00  0.00           H  
ATOM    708  H4'  DT A  22     -10.644  -0.793   4.040  0.00  0.00           H  
ATOM    709  H5'  DT A  22      -8.728  -0.926   5.290  2.00  0.00           H  
ATOM    710  H71  DT A  22      -3.598  -3.997   1.210  1.00  0.00           H  
ATOM    711  H72  DT A  22      -3.592  -2.289   1.780  0.00  0.00           H  
ATOM    712  H73  DT A  22      -4.396  -3.649   2.720  3.00  0.00           H  
ATOM    713 H2''  DT A  22      -9.893  -3.735   1.040  7.00  0.00           H  
ATOM    714 H5''  DT A  22      -9.741  -2.253   5.690  0.00  0.00           H  
ATOM    715  P    DT A  23     -12.688  -3.378   1.660  9.00  0.00           P  
ATOM    716  C5'  DT A  23     -12.044  -3.227  -0.920  9.00  0.00           C  
ATOM    717  O5'  DT A  23     -12.150  -3.973   0.230  3.00  0.00           O  
ATOM    718  C4'  DT A  23     -11.435  -4.003  -2.050  9.00  0.00           C  
ATOM    719  O4'  DT A  23     -10.022  -4.152  -1.790  9.00  0.00           O  
ATOM    720  C3'  DT A  23     -12.010  -5.317  -2.310  1.00  0.00           C  
ATOM    721  O3'  DT A  23     -12.559  -5.501  -3.640  3.00  0.00           O  
ATOM    722  C2'  DT A  23     -10.705  -6.180  -2.160  4.00  0.00           C  
ATOM    723  C1'  DT A  23      -9.548  -5.281  -2.470  3.00  0.00           C  
ATOM    724  N1   DT A  23      -8.296  -5.749  -1.800  2.00  0.00           N  
ATOM    725  C2   DT A  23      -7.184  -5.933  -2.630  1.00  0.00           C  
ATOM    726  O2   DT A  23      -7.128  -5.665  -3.780  7.00  0.00           O  
ATOM    727  N3   DT A  23      -5.939  -6.178  -2.040  2.00  0.00           N  
ATOM    728  C4   DT A  23      -5.780  -6.204  -0.670  8.00  0.00           C  
ATOM    729  O4   DT A  23      -4.617  -6.211  -0.220  3.00  0.00           O  
ATOM    730  C5   DT A  23      -6.963  -6.099   0.170  2.00  0.00           C  
ATOM    731  C6   DT A  23      -8.186  -5.850  -0.370  6.00  0.00           C  
ATOM    732  C7   DT A  23      -6.839  -6.144   1.680  5.00  0.00           C  
ATOM    733  OP1  DT A  23     -13.900  -2.605   1.240  4.00  0.00           O  
ATOM    734  OP2  DT A  23     -12.750  -4.456   2.720  5.00  0.00           O1-
ATOM    735  H3   DT A  23      -5.098  -6.506  -2.560  5.00  0.00           H  
ATOM    736  H6   DT A  23      -9.132  -5.756   0.190  0.00  0.00           H  
ATOM    737  H1'  DT A  23      -9.395  -5.153  -3.520  9.00  0.00           H  
ATOM    738  H2'  DT A  23     -10.615  -6.634  -1.170  9.00  0.00           H  
ATOM    739  H3'  DT A  23     -12.693  -5.626  -1.520  4.00  0.00           H  
ATOM    740  H4'  DT A  23     -11.598  -3.383  -2.910  3.00  0.00           H  
ATOM    741  H5'  DT A  23     -11.569  -2.229  -0.760  5.00  0.00           H  
ATOM    742  H71  DT A  23      -6.142  -5.426   2.130  0.00  0.00           H  
ATOM    743  H72  DT A  23      -7.875  -6.117   2.020  5.00  0.00           H  
ATOM    744  H73  DT A  23      -6.450  -7.174   1.850  1.00  0.00           H  
ATOM    745 H2''  DT A  23     -10.860  -6.970  -2.980  0.00  0.00           H  
ATOM    746 H5''  DT A  23     -13.080  -3.141  -1.330  5.00  0.00           H  
ATOM    747  P    DA A  24     -13.954  -6.098  -3.870  3.00  0.00           P  
ATOM    748  C5'  DA A  24     -13.759  -8.304  -2.550  1.00  0.00           C  
ATOM    749  O5'  DA A  24     -13.843  -7.769  -3.800  1.00  0.00           O  
ATOM    750  C4'  DA A  24     -13.705  -9.836  -2.720  7.00  0.00           C  
ATOM    751  O4'  DA A  24     -12.650 -10.346  -3.460  3.00  0.00           O  
ATOM    752  C3'  DA A  24     -13.728 -10.444  -1.270  5.00  0.00           C  
ATOM    753  O3'  DA A  24     -14.712 -11.463  -1.250  5.00  0.00           O  
ATOM    754  C2'  DA A  24     -12.266 -10.829  -1.190  9.00  0.00           C  
ATOM    755  C1'  DA A  24     -11.845 -11.206  -2.600  1.00  0.00           C  
ATOM    756  N1   DA A  24      -6.828  -9.922  -1.370  9.00  0.00           N  
ATOM    757  C2   DA A  24      -7.955  -9.528  -0.860  0.00  0.00           C  
ATOM    758  N3   DA A  24      -9.184  -9.963  -1.130  9.00  0.00           N  
ATOM    759  C4   DA A  24      -9.252 -10.785  -2.230  0.00  0.00           C  
ATOM    760  C5   DA A  24      -8.165 -11.276  -2.900  2.00  0.00           C  
ATOM    761  C6   DA A  24      -6.943 -10.843  -2.370  7.00  0.00           C  
ATOM    762  N6   DA A  24      -5.787 -11.136  -2.910  3.00  0.00           N  
ATOM    763  N7   DA A  24      -8.549 -11.974  -4.000  9.00  0.00           N  
ATOM    764  C8   DA A  24      -9.880 -12.012  -3.970  2.00  0.00           C  
ATOM    765  N9   DA A  24     -10.451 -11.251  -2.920  7.00  0.00           N  
ATOM    766  OP1  DA A  24     -14.311  -5.747  -5.200  0.00  0.00           O  
ATOM    767  OP2  DA A  24     -14.912  -5.596  -2.830  8.00  0.00           O1-
ATOM    768  H2   DA A  24      -7.916  -8.656  -0.220  7.00  0.00           H  
ATOM    769  H8   DA A  24     -10.407 -12.495  -4.740  6.00  0.00           H  
ATOM    770  H1'  DA A  24     -12.295 -12.208  -2.710  1.00  0.00           H  
ATOM    771  H2'  DA A  24     -11.708  -9.876  -0.990  8.00  0.00           H  
ATOM    772  H3'  DA A  24     -14.031  -9.647  -0.540  2.00  0.00           H  
ATOM    773  H4'  DA A  24     -14.566 -10.226  -3.210  1.00  0.00           H  
ATOM    774  H5'  DA A  24     -14.691  -8.110  -1.980  4.00  0.00           H  
ATOM    775  H61  DA A  24      -5.063 -10.864  -2.280  2.00  0.00           H  
ATOM    776  H62  DA A  24      -5.725 -11.800  -3.660  1.00  0.00           H  
ATOM    777 H2''  DA A  24     -12.151 -11.547  -0.460  4.00  0.00           H  
ATOM    778 H5''  DA A  24     -12.835  -7.916  -2.010  6.00  0.00           H  
ATOM    779  P    DG A  25     -14.785 -12.667  -0.200  0.00  0.00           P  
ATOM    780  C5'  DG A  25     -14.109 -14.632  -1.920  7.00  0.00           C  
ATOM    781  O5'  DG A  25     -13.743 -13.746  -0.830  5.00  0.00           O  
ATOM    782  C4'  DG A  25     -12.813 -15.372  -2.340  6.00  0.00           C  
ATOM    783  O4'  DG A  25     -11.709 -14.578  -2.530  2.00  0.00           O  
ATOM    784  C3'  DG A  25     -12.308 -16.454  -1.420  3.00  0.00           C  
ATOM    785  O3'  DG A  25     -13.073 -17.646  -1.580  5.00  0.00           O  
ATOM    786  C2'  DG A  25     -10.982 -16.677  -2.020  1.00  0.00           C  
ATOM    787  C1'  DG A  25     -10.471 -15.334  -2.430  4.00  0.00           C  
ATOM    788  N1   DG A  25      -5.797 -13.686  -1.070  8.00  0.00           N  
ATOM    789  C2   DG A  25      -6.185 -14.473  -2.070  3.00  0.00           C  
ATOM    790  N2   DG A  25      -5.338 -14.777  -3.000  6.00  0.00           N  
ATOM    791  N3   DG A  25      -7.436 -14.951  -2.260  3.00  0.00           N  
ATOM    792  C4   DG A  25      -8.340 -14.434  -1.360  9.00  0.00           C  
ATOM    793  C5   DG A  25      -8.085 -13.515  -0.390  4.00  0.00           C  
ATOM    794  C6   DG A  25      -6.716 -13.127  -0.130  3.00  0.00           C  
ATOM    795  O6   DG A  25      -6.316 -12.333   0.700  4.00  0.00           O  
ATOM    796  N7   DG A  25      -9.229 -13.247   0.310  8.00  0.00           N  
ATOM    797  C8   DG A  25     -10.150 -13.936  -0.300  2.00  0.00           C  
ATOM    798  N9   DG A  25      -9.680 -14.646  -1.360  4.00  0.00           N  
ATOM    799  OP1  DG A  25     -16.156 -13.270  -0.330  5.00  0.00           O  
ATOM    800  OP2  DG A  25     -14.278 -12.279   1.120  3.00  0.00           O1-
ATOM    801  H1   DG A  25      -4.785 -13.561  -0.970  9.00  0.00           H  
ATOM    802  H8   DG A  25     -11.168 -13.968   0.090  2.00  0.00           H  
ATOM    803  H1'  DG A  25      -9.899 -15.357  -3.330  9.00  0.00           H  
ATOM    804  H2'  DG A  25     -10.374 -17.319  -1.350  7.00  0.00           H  
ATOM    805  H21  DG A  25      -4.413 -14.409  -3.040  1.00  0.00           H  
ATOM    806  H3'  DG A  25     -12.298 -16.116  -0.430  4.00  0.00           H  
ATOM    807  H22  DG A  25      -5.605 -15.337  -3.790  4.00  0.00           H  
ATOM    808  H4'  DG A  25     -13.100 -15.969  -3.190  7.00  0.00           H  
ATOM    809  H5'  DG A  25     -14.577 -14.182  -2.780  8.00  0.00           H  
ATOM    810 H2''  DG A  25     -11.002 -17.232  -2.980  1.00  0.00           H  
ATOM    811 H5''  DG A  25     -14.837 -15.333  -1.560  2.00  0.00           H  
ATOM    812  P    DG A  26     -12.680 -19.069  -0.830  2.00  0.00           P  
ATOM    813  C5'  DG A  26     -11.285 -19.994  -2.940  1.00  0.00           C  
ATOM    814  O5'  DG A  26     -11.369 -19.659  -1.580  6.00  0.00           O  
ATOM    815  C4'  DG A  26      -9.921 -20.409  -3.380  0.00  0.00           C  
ATOM    816  O4'  DG A  26      -8.969 -19.372  -3.110  8.00  0.00           O  
ATOM    817  C3'  DG A  26      -9.492 -21.749  -2.760  8.00  0.00           C  
ATOM    818  O3'  DG A  26      -8.853 -22.536  -3.790  4.00  0.00           O  
ATOM    819  C2'  DG A  26      -8.432 -21.211  -1.740  7.00  0.00           C  
ATOM    820  C1'  DG A  26      -7.901 -20.024  -2.530  2.00  0.00           C  
ATOM    821  N1   DG A  26      -8.014 -16.702   1.290  2.00  0.00           N  
ATOM    822  C2   DG A  26      -8.937 -17.561   0.900  5.00  0.00           C  
ATOM    823  N2   DG A  26     -10.158 -17.455   1.410  3.00  0.00           N  
ATOM    824  N3   DG A  26      -8.774 -18.525   0.020  9.00  0.00           N  
ATOM    825  C4   DG A  26      -7.554 -18.459  -0.610  1.00  0.00           C  
ATOM    826  C5   DG A  26      -6.555 -17.577  -0.290  8.00  0.00           C  
ATOM    827  C6   DG A  26      -6.748 -16.673   0.800  8.00  0.00           C  
ATOM    828  O6   DG A  26      -6.001 -15.745   1.160  6.00  0.00           O  
ATOM    829  N7   DG A  26      -5.442 -17.719  -1.160  1.00  0.00           N  
ATOM    830  C8   DG A  26      -5.868 -18.633  -1.940  6.00  0.00           C  
ATOM    831  N9   DG A  26      -7.090 -19.137  -1.680  6.00  0.00           N  
ATOM    832  OP1  DG A  26     -13.753 -20.035  -1.170  5.00  0.00           O  
ATOM    833  OP2  DG A  26     -12.457 -18.770   0.590  5.00  0.00           O1-
ATOM    834  H1   DG A  26      -8.290 -16.032   2.030  7.00  0.00           H  
ATOM    835  H8   DG A  26      -5.221 -19.045  -2.740  7.00  0.00           H  
ATOM    836  H1'  DG A  26      -7.249 -20.339  -3.370  2.00  0.00           H  
ATOM    837  H2'  DG A  26      -8.929 -20.869  -0.830  2.00  0.00           H  
ATOM    838  H21  DG A  26     -10.282 -16.936   2.300  7.00  0.00           H  
ATOM    839  H3'  DG A  26     -10.358 -22.202  -2.410  8.00  0.00           H  
ATOM    840  H22  DG A  26     -10.914 -17.982   0.970  8.00  0.00           H  
ATOM    841  H4'  DG A  26      -9.882 -20.506  -4.490  6.00  0.00           H  
ATOM    842  H5'  DG A  26     -11.567 -19.141  -3.550  7.00  0.00           H  
ATOM    843 H2''  DG A  26      -7.685 -21.923  -1.540  9.00  0.00           H  
ATOM    844 H5''  DG A  26     -11.965 -20.799  -3.190  2.00  0.00           H  
ATOM    845  P    DG A  27      -8.136 -23.951  -3.480  7.00  0.00           P  
ATOM    846  C5'  DG A  27      -5.677 -23.089  -3.550  4.00  0.00           C  
ATOM    847  O5'  DG A  27      -6.662 -23.775  -2.870  6.00  0.00           O  
ATOM    848  C4'  DG A  27      -4.653 -22.493  -2.570  9.00  0.00           C  
ATOM    849  O4'  DG A  27      -5.220 -21.534  -1.720  3.00  0.00           O  
ATOM    850  C3'  DG A  27      -3.842 -23.460  -1.680  4.00  0.00           C  
ATOM    851  O3'  DG A  27      -2.474 -23.220  -1.830  3.00  0.00           O  
ATOM    852  C2'  DG A  27      -4.237 -23.131  -0.280  1.00  0.00           C  
ATOM    853  C1'  DG A  27      -4.559 -21.609  -0.480  5.00  0.00           C  
ATOM    854  N1   DG A  27      -4.112 -18.228   3.330  5.00  0.00           N  
ATOM    855  C2   DG A  27      -3.274 -18.598   2.310  7.00  0.00           C  
ATOM    856  N2   DG A  27      -2.104 -17.968   2.210  8.00  0.00           N  
ATOM    857  N3   DG A  27      -3.550 -19.512   1.340  6.00  0.00           N  
ATOM    858  C4   DG A  27      -4.816 -19.983   1.440  1.00  0.00           C  
ATOM    859  C5   DG A  27      -5.799 -19.604   2.370  4.00  0.00           C  
ATOM    860  C6   DG A  27      -5.424 -18.737   3.440  5.00  0.00           C  
ATOM    861  O6   DG A  27      -6.132 -18.294   4.320  8.00  0.00           O  
ATOM    862  N7   DG A  27      -6.949 -20.372   2.150  4.00  0.00           N  
ATOM    863  C8   DG A  27      -6.579 -21.155   1.130  7.00  0.00           C  
ATOM    864  N9   DG A  27      -5.316 -20.980   0.640  6.00  0.00           N  
ATOM    865  OP1  DG A  27      -8.063 -24.547  -4.880  3.00  0.00           O  
ATOM    866  OP2  DG A  27      -9.040 -24.662  -2.500  2.00  0.00           O1-
ATOM    867  H1   DG A  27      -3.811 -17.670   4.120  5.00  0.00           H  
ATOM    868  H8   DG A  27      -7.259 -21.941   0.720  4.00  0.00           H  
ATOM    869  H1'  DG A  27      -3.603 -21.160  -0.630  1.00  0.00           H  
ATOM    870  H2'  DG A  27      -5.173 -23.598   0.030  2.00  0.00           H  
ATOM    871  H21  DG A  27      -1.920 -17.216   2.890  6.00  0.00           H  
ATOM    872  H3'  DG A  27      -4.119 -24.473  -2.020  5.00  0.00           H  
ATOM    873  H22  DG A  27      -1.439 -18.176   1.430  3.00  0.00           H  
ATOM    874  H4'  DG A  27      -3.899 -21.922  -3.260  3.00  0.00           H  
ATOM    875  H5'  DG A  27      -6.197 -22.160  -3.980  3.00  0.00           H  
ATOM    876 H2''  DG A  27      -3.465 -23.221   0.360  1.00  0.00           H  
ATOM    877 H5''  DG A  27      -5.213 -23.772  -4.290  2.00  0.00           H  
ATOM    878  P    DT A  28      -1.470 -24.301  -2.490  9.00  0.00           P  
ATOM    879  C5'  DT A  28      -1.502 -25.725  -0.310  6.00  0.00           C  
ATOM    880  O5'  DT A  28      -1.819 -25.593  -1.680  8.00  0.00           O  
ATOM    881  C4'  DT A  28      -1.898 -27.147   0.160  7.00  0.00           C  
ATOM    882  O4'  DT A  28      -1.571 -27.292   1.520  1.00  0.00           O  
ATOM    883  C3'  DT A  28      -3.377 -27.453   0.080  0.00  0.00           C  
ATOM    884  O3'  DT A  28      -3.588 -28.870   0.190  2.00  0.00           O  
ATOM    885  C2'  DT A  28      -3.794 -26.827   1.430  4.00  0.00           C  
ATOM    886  C1'  DT A  28      -2.681 -27.329   2.390  6.00  0.00           C  
ATOM    887  N1   DT A  28      -2.581 -26.399   3.580  9.00  0.00           N  
ATOM    888  C2   DT A  28      -3.412 -26.582   4.640  1.00  0.00           C  
ATOM    889  O2   DT A  28      -4.287 -27.434   4.660  4.00  0.00           O  
ATOM    890  N3   DT A  28      -3.304 -25.726   5.680  2.00  0.00           N  
ATOM    891  C4   DT A  28      -2.312 -24.905   5.930  1.00  0.00           C  
ATOM    892  O4   DT A  28      -2.316 -24.301   6.980  1.00  0.00           O  
ATOM    893  C5   DT A  28      -1.474 -24.692   4.740  7.00  0.00           C  
ATOM    894  C6   DT A  28      -1.657 -25.395   3.600  8.00  0.00           C  
ATOM    895  C7   DT A  28      -0.347 -23.686   4.720  4.00  0.00           C  
ATOM    896  OP1  DT A  28      -0.116 -23.880  -2.080  1.00  0.00           O  
ATOM    897  OP2  DT A  28      -1.730 -24.508  -3.930  0.00  0.00           O1-
ATOM    898  H3   DT A  28      -3.945 -25.763   6.380  1.00  0.00           H  
ATOM    899  H6   DT A  28      -1.096 -25.218   2.660  7.00  0.00           H  
ATOM    900  H1'  DT A  28      -2.718 -28.368   2.720  8.00  0.00           H  
ATOM    901  H2'  DT A  28      -3.936 -25.732   1.330  7.00  0.00           H  
ATOM    902  H3'  DT A  28      -3.825 -26.980  -0.750  5.00  0.00           H  
ATOM    903  H4'  DT A  28      -1.435 -27.949  -0.460  2.00  0.00           H  
ATOM    904  H5'  DT A  28      -2.142 -24.981   0.230  3.00  0.00           H  
ATOM    905  H71  DT A  28       0.470 -23.960   5.380  8.00  0.00           H  
ATOM    906  H72  DT A  28      -0.132 -23.519   3.700  5.00  0.00           H  
ATOM    907  H73  DT A  28      -0.701 -22.754   5.130  1.00  0.00           H  
ATOM    908 H2''  DT A  28      -4.793 -27.164   1.690  7.00  0.00           H  
ATOM    909 H5''  DT A  28      -0.478 -25.598  -0.140  0.00  0.00           H  
ATOM    910  P    DT A  29      -4.718 -29.706  -0.620  7.00  0.00           P  
ATOM    911  C5'  DT A  29      -6.340 -30.061   1.530  5.00  0.00           C  
ATOM    912  O5'  DT A  29      -6.134 -29.507   0.210  0.00  0.00           O  
ATOM    913  C4'  DT A  29      -7.753 -29.815   2.070  9.00  0.00           C  
ATOM    914  O4'  DT A  29      -7.906 -30.381   3.400  1.00  0.00           O  
ATOM    915  C3'  DT A  29      -8.036 -28.368   2.130  4.00  0.00           C  
ATOM    916  O3'  DT A  29      -9.476 -28.235   2.090  4.00  0.00           O  
ATOM    917  C2'  DT A  29      -7.433 -28.000   3.410  8.00  0.00           C  
ATOM    918  C1'  DT A  29      -7.681 -29.263   4.250  6.00  0.00           C  
ATOM    919  N1   DT A  29      -6.527 -29.536   5.180  8.00  0.00           N  
ATOM    920  C2   DT A  29      -6.432 -28.755   6.360  7.00  0.00           C  
ATOM    921  O2   DT A  29      -7.232 -27.899   6.600  7.00  0.00           O  
ATOM    922  N3   DT A  29      -5.252 -28.926   7.050  6.00  0.00           N  
ATOM    923  C4   DT A  29      -4.260 -29.843   6.770  7.00  0.00           C  
ATOM    924  O4   DT A  29      -3.351 -29.915   7.550  8.00  0.00           O  
ATOM    925  C5   DT A  29      -4.387 -30.642   5.600  6.00  0.00           C  
ATOM    926  C6   DT A  29      -5.487 -30.417   4.850  3.00  0.00           C  
ATOM    927  C7   DT A  29      -3.327 -31.637   5.150  3.00  0.00           C  
ATOM    928  OP1  DT A  29      -4.470 -31.176  -0.570  4.00  0.00           O  
ATOM    929  OP2  DT A  29      -4.907 -29.034  -1.910  0.00  0.00           O1-
ATOM    930  H3   DT A  29      -5.047 -28.300   7.800  2.00  0.00           H  
ATOM    931  H6   DT A  29      -5.546 -30.996   3.940  7.00  0.00           H  
ATOM    932  H1'  DT A  29      -8.601 -29.059   4.850  8.00  0.00           H  
ATOM    933  H2'  DT A  29      -6.391 -27.824   3.270  3.00  0.00           H  
ATOM    934  H3'  DT A  29      -7.583 -27.822   1.310  8.00  0.00           H  
ATOM    935  H4'  DT A  29      -8.414 -30.281   1.350  7.00  0.00           H  
ATOM    936  H5'  DT A  29      -5.572 -29.693   2.210  1.00  0.00           H  
ATOM    937  H71  DT A  29      -3.504 -32.130   4.190  3.00  0.00           H  
ATOM    938  H72  DT A  29      -2.392 -31.079   5.090  4.00  0.00           H  
ATOM    939  H73  DT A  29      -3.243 -32.443   5.930  6.00  0.00           H  
ATOM    940 H2''  DT A  29      -7.801 -27.164   3.920  3.00  0.00           H  
ATOM    941 H5''  DT A  29      -6.261 -31.115   1.420  0.00  0.00           H  
ATOM    942  P    DA A  30     -10.071 -26.831   1.610  8.00  0.00           P  
ATOM    943  C5'  DA A  30     -10.449 -26.041   4.110  9.00  0.00           C  
ATOM    944  O5'  DA A  30      -9.830 -25.794   2.790  2.00  0.00           O  
ATOM    945  C4'  DA A  30     -10.146 -24.945   5.070  1.00  0.00           C  
ATOM    946  O4'  DA A  30      -8.708 -24.879   5.230  9.00  0.00           O  
ATOM    947  C3'  DA A  30     -10.600 -23.506   4.640  7.00  0.00           C  
ATOM    948  O3'  DA A  30     -11.037 -22.876   5.770  4.00  0.00           O  
ATOM    949  C2'  DA A  30      -9.305 -22.819   4.230  1.00  0.00           C  
ATOM    950  C1'  DA A  30      -8.197 -23.514   5.030  3.00  0.00           C  
ATOM    951  N1   DA A  30      -3.505 -21.563   4.590  5.00  0.00           N  
ATOM    952  C2   DA A  30      -4.447 -21.340   5.460  2.00  0.00           C  
ATOM    953  N3   DA A  30      -5.714 -21.825   5.480  5.00  0.00           N  
ATOM    954  C4   DA A  30      -5.910 -22.639   4.380  2.00  0.00           C  
ATOM    955  C5   DA A  30      -5.011 -22.911   3.350  5.00  0.00           C  
ATOM    956  C6   DA A  30      -3.771 -22.309   3.540  6.00  0.00           C  
ATOM    957  N6   DA A  30      -2.657 -22.278   2.840  1.00  0.00           N  
ATOM    958  N7   DA A  30      -5.543 -23.845   2.470  6.00  0.00           N  
ATOM    959  C8   DA A  30      -6.710 -24.112   3.000  9.00  0.00           C  
ATOM    960  N9   DA A  30      -6.972 -23.440   4.160  5.00  0.00           N  
ATOM    961  OP1  DA A  30     -11.555 -27.008   1.470  0.00  0.00           O  
ATOM    962  OP2  DA A  30      -9.270 -26.379   0.460  7.00  0.00           O1-
ATOM    963  H2   DA A  30      -4.222 -20.520   6.190  5.00  0.00           H  
ATOM    964  H8   DA A  30      -7.347 -24.816   2.480  2.00  0.00           H  
ATOM    965  H1'  DA A  30      -8.042 -23.085   5.970  0.00  0.00           H  
ATOM    966  H2'  DA A  30      -9.167 -22.893   3.100  5.00  0.00           H  
ATOM    967  H3'  DA A  30     -11.304 -23.506   3.840  1.00  0.00           H  
ATOM    968  H4'  DA A  30     -10.694 -25.348   5.970  2.00  0.00           H  
ATOM    969  H5'  DA A  30     -10.055 -26.974   4.570  6.00  0.00           H  
ATOM    970  H61  DA A  30      -1.848 -21.820   3.180  6.00  0.00           H  
ATOM    971  H62  DA A  30      -2.501 -22.830   2.010  8.00  0.00           H  
ATOM    972 H2''  DA A  30      -9.438 -21.747   4.460  2.00  0.00           H  
ATOM    973 H5''  DA A  30     -11.465 -26.096   4.040  0.00  0.00           H  
ATOM    974  P    DG A  31     -12.320 -21.937   5.760  9.00  0.00           P  
ATOM    975  C5'  DG A  31     -13.358 -21.115   8.150  6.00  0.00           C  
ATOM    976  O5'  DG A  31     -12.317 -21.101   7.050  3.00  0.00           O  
ATOM    977  C4'  DG A  31     -14.123 -19.783   8.230  3.00  0.00           C  
ATOM    978  O4'  DG A  31     -13.148 -18.868   8.670  7.00  0.00           O  
ATOM    979  C3'  DG A  31     -14.695 -19.350   6.860  6.00  0.00           C  
ATOM    980  O3'  DG A  31     -16.017 -18.921   6.970  3.00  0.00           O  
ATOM    981  C2'  DG A  31     -13.811 -18.195   6.490  0.00  0.00           C  
ATOM    982  C1'  DG A  31     -13.278 -17.724   7.800  5.00  0.00           C  
ATOM    983  N1   DG A  31      -8.383 -17.423   6.190  0.00  0.00           N  
ATOM    984  C2   DG A  31      -9.257 -18.389   5.930  7.00  0.00           C  
ATOM    985  N2   DG A  31      -8.931 -19.286   4.950  6.00  0.00           N  
ATOM    986  N3   DG A  31     -10.527 -18.395   6.410  7.00  0.00           N  
ATOM    987  C4   DG A  31     -10.838 -17.206   7.120  8.00  0.00           C  
ATOM    988  C5   DG A  31     -10.012 -16.114   7.310  9.00  0.00           C  
ATOM    989  C6   DG A  31      -8.626 -16.252   6.920  2.00  0.00           C  
ATOM    990  O6   DG A  31      -7.702 -15.472   7.010  7.00  0.00           O  
ATOM    991  N7   DG A  31     -10.844 -15.144   7.920  7.00  0.00           N  
ATOM    992  C8   DG A  31     -11.989 -15.649   8.190  8.00  0.00           C  
ATOM    993  N9   DG A  31     -12.081 -16.932   7.720  0.00  0.00           N  
ATOM    994  OP1  DG A  31     -13.539 -22.744   5.770  8.00  0.00           O  
ATOM    995  OP2  DG A  31     -12.255 -21.023   4.630  1.00  0.00           O1-
ATOM    996  H1   DG A  31      -7.359 -17.654   6.090  7.00  0.00           H  
ATOM    997  H8   DG A  31     -12.790 -15.025   8.800  4.00  0.00           H  
ATOM    998  H1'  DG A  31     -14.054 -17.150   8.140  5.00  0.00           H  
ATOM    999  H2'  DG A  31     -13.066 -18.677   5.810  4.00  0.00           H  
ATOM   1000  H21  DG A  31      -8.050 -19.246   4.390  9.00  0.00           H  
ATOM   1001  H3'  DG A  31     -14.530 -20.131   6.090  7.00  0.00           H  
ATOM   1002  H22  DG A  31      -9.716 -19.618   4.410  5.00  0.00           H  
ATOM   1003  H4'  DG A  31     -14.983 -19.890   8.920  4.00  0.00           H  
ATOM   1004  H5'  DG A  31     -12.894 -21.208   9.160  2.00  0.00           H  
ATOM   1005 H2''  DG A  31     -14.218 -17.408   5.900  9.00  0.00           H  
ATOM   1006 H5''  DG A  31     -14.054 -21.944   8.000  4.00  0.00           H  
ATOM   1007  P    DG A  32     -16.910 -18.288   5.790  6.00  0.00           P  
ATOM   1008  C5'  DG A  32     -16.779 -15.771   6.750  2.00  0.00           C  
ATOM   1009  O5'  DG A  32     -16.640 -16.671   5.640  4.00  0.00           O  
ATOM   1010  C4'  DG A  32     -16.296 -14.320   6.540  4.00  0.00           C  
ATOM   1011  O4'  DG A  32     -14.940 -14.239   6.830  7.00  0.00           O  
ATOM   1012  C3'  DG A  32     -16.561 -13.745   5.150  4.00  0.00           C  
ATOM   1013  O3'  DG A  32     -17.865 -13.233   5.070  6.00  0.00           O  
ATOM   1014  C2'  DG A  32     -15.482 -12.648   5.150  6.00  0.00           C  
ATOM   1015  C1'  DG A  32     -14.337 -13.302   5.930  9.00  0.00           C  
ATOM   1016  N1   DG A  32      -9.281 -13.861   4.830  2.00  0.00           N  
ATOM   1017  C2   DG A  32      -9.883 -12.872   5.570  9.00  0.00           C  
ATOM   1018  N2   DG A  32      -9.086 -12.067   6.180  4.00  0.00           N  
ATOM   1019  N3   DG A  32     -11.169 -12.764   5.690  2.00  0.00           N  
ATOM   1020  C4   DG A  32     -11.917 -13.753   5.100  6.00  0.00           C  
ATOM   1021  C5   DG A  32     -11.426 -14.735   4.360  6.00  0.00           C  
ATOM   1022  C6   DG A  32     -10.010 -14.780   4.080  7.00  0.00           C  
ATOM   1023  O6   DG A  32      -9.364 -15.624   3.450  7.00  0.00           O  
ATOM   1024  N7   DG A  32     -12.462 -15.650   3.840  8.00  0.00           N  
ATOM   1025  C8   DG A  32     -13.563 -15.059   4.280  9.00  0.00           C  
ATOM   1026  N9   DG A  32     -13.316 -13.955   5.130  3.00  0.00           N  
ATOM   1027  OP1  DG A  32     -18.314 -18.345   6.240  0.00  0.00           O  
ATOM   1028  OP2  DG A  32     -16.502 -18.965   4.500  6.00  0.00           O1-
ATOM   1029  H1   DG A  32      -8.327 -13.765   4.550  7.00  0.00           H  
ATOM   1030  H8   DG A  32     -14.587 -15.409   4.050  8.00  0.00           H  
ATOM   1031  H1'  DG A  32     -13.859 -12.511   6.520  1.00  0.00           H  
ATOM   1032  H2'  DG A  32     -15.275 -12.248   4.140  6.00  0.00           H  
ATOM   1033  H21  DG A  32      -8.096 -12.108   5.880  7.00  0.00           H  
ATOM   1034  H3'  DG A  32     -16.398 -14.559   4.350  7.00  0.00           H  
ATOM   1035  H22  DG A  32      -9.462 -11.419   6.810  9.00  0.00           H  
ATOM   1036  H4'  DG A  32     -16.822 -13.717   7.270  3.00  0.00           H  
ATOM   1037  H5'  DG A  32     -16.256 -16.281   7.560  6.00  0.00           H  
ATOM   1038 H2''  DG A  32     -15.870 -11.798   5.700  8.00  0.00           H  
ATOM   1039 H5''  DG A  32     -17.832 -15.771   6.970  4.00  0.00           H  
ATOM   1040  P    DG A  33     -18.276 -12.395   3.850  8.00  0.00           P  
ATOM   1041  C5'  DG A  33     -18.289  -9.938   4.600  8.00  0.00           C  
ATOM   1042  O5'  DG A  33     -17.677 -10.929   3.870  8.00  0.00           O  
ATOM   1043  C4'  DG A  33     -17.385  -8.711   4.410  0.00  0.00           C  
ATOM   1044  O4'  DG A  33     -16.178  -8.748   5.100  1.00  0.00           O  
ATOM   1045  C3'  DG A  33     -17.118  -8.196   3.030  1.00  0.00           C  
ATOM   1046  O3'  DG A  33     -16.948  -9.215   2.120  8.00  0.00           O  
ATOM   1047  C2'  DG A  33     -15.742  -7.515   3.220  0.00  0.00           C  
ATOM   1048  C1'  DG A  33     -15.379  -7.626   4.690  0.00  0.00           C  
ATOM   1049  N1   DG A  33     -10.955 -10.089   4.270  1.00  0.00           N  
ATOM   1050  C2   DG A  33     -12.125 -10.422   3.710  7.00  0.00           C  
ATOM   1051  N2   DG A  33     -12.064 -11.278   2.740  6.00  0.00           N  
ATOM   1052  N3   DG A  33     -13.270  -9.731   3.880  8.00  0.00           N  
ATOM   1053  C4   DG A  33     -13.085  -8.751   4.850  4.00  0.00           C  
ATOM   1054  C5   DG A  33     -11.960  -8.468   5.610  6.00  0.00           C  
ATOM   1055  C6   DG A  33     -10.818  -9.199   5.300  4.00  0.00           C  
ATOM   1056  O6   DG A  33      -9.732  -9.111   5.860  9.00  0.00           O  
ATOM   1057  N7   DG A  33     -12.143  -7.491   6.580  0.00  0.00           N  
ATOM   1058  C8   DG A  33     -13.405  -7.115   6.290  6.00  0.00           C  
ATOM   1059  N9   DG A  33     -14.041  -7.840   5.290  4.00  0.00           N  
ATOM   1060  OP1  DG A  33     -19.766 -12.360   3.960  6.00  0.00           O  
ATOM   1061  OP2  DG A  33     -17.764 -13.003   2.630  8.00  0.00           O1-
ATOM   1062  H1   DG A  33     -10.183 -10.669   3.980  7.00  0.00           H  
ATOM   1063  H8   DG A  33     -14.008  -6.354   6.800  6.00  0.00           H  
ATOM   1064  H1'  DG A  33     -15.806  -6.745   5.140  4.00  0.00           H  
ATOM   1065  H2'  DG A  33     -14.960  -7.923   2.650  7.00  0.00           H  
ATOM   1066  H21  DG A  33     -11.184 -11.647   2.520  9.00  0.00           H  
ATOM   1067  H3'  DG A  33     -17.864  -7.441   2.710  8.00  0.00           H  
ATOM   1068  H22  DG A  33     -12.868 -11.658   2.260  0.00  0.00           H  
ATOM   1069  H4'  DG A  33     -17.890  -7.921   4.990  2.00  0.00           H  
ATOM   1070  H5'  DG A  33     -18.359 -10.163   5.680  6.00  0.00           H  
ATOM   1071 H2''  DG A  33     -15.925  -6.470   2.930  2.00  0.00           H  
ATOM   1072 H5''  DG A  33     -19.223  -9.809   4.110  9.00  0.00           H  
ATOM   1073  P    DT A  34     -17.583  -9.304   0.690  6.00  0.00           P  
ATOM   1074  C5'  DT A  34     -19.962 -10.429   1.060  3.00  0.00           C  
ATOM   1075  O5'  DT A  34     -19.201  -9.222   0.870  5.00  0.00           O  
ATOM   1076  C4'  DT A  34     -21.409 -10.259   0.600  4.00  0.00           C  
ATOM   1077  O4'  DT A  34     -22.160 -11.492   0.710  9.00  0.00           O  
ATOM   1078  C3'  DT A  34     -22.301  -9.238   1.240  1.00  0.00           C  
ATOM   1079  O3'  DT A  34     -23.187  -8.810   0.200  1.00  0.00           O  
ATOM   1080  C2'  DT A  34     -23.142 -10.013   2.240  4.00  0.00           C  
ATOM   1081  C1'  DT A  34     -23.379 -11.280   1.440  8.00  0.00           C  
ATOM   1082  N1   DT A  34     -23.805 -12.536   2.190  4.00  0.00           N  
ATOM   1083  C2   DT A  34     -24.695 -13.370   1.510  7.00  0.00           C  
ATOM   1084  O2   DT A  34     -24.913 -13.365   0.320  9.00  0.00           O  
ATOM   1085  N3   DT A  34     -25.245 -14.401   2.250  3.00  0.00           N  
ATOM   1086  C4   DT A  34     -24.885 -14.770   3.560  5.00  0.00           C  
ATOM   1087  O4   DT A  34     -25.371 -15.764   4.050  3.00  0.00           O  
ATOM   1088  C5   DT A  34     -24.026 -13.804   4.250  8.00  0.00           C  
ATOM   1089  C6   DT A  34     -23.565 -12.774   3.550  1.00  0.00           C  
ATOM   1090  C7   DT A  34     -23.754 -13.927   5.720  9.00  0.00           C  
ATOM   1091  OP1  DT A  34     -17.159 -10.596   0.120  2.00  0.00           O  
ATOM   1092  OP2  DT A  34     -17.094  -8.137  -0.050  0.00  0.00           O1-
ATOM   1093  H3   DT A  34     -25.846 -15.013   1.810  0.00  0.00           H  
ATOM   1094  H6   DT A  34     -23.004 -12.024   4.160  4.00  0.00           H  
ATOM   1095  H1'  DT A  34     -24.116 -10.946   0.690  7.00  0.00           H  
ATOM   1096  H2'  DT A  34     -22.717 -10.240   3.160  3.00  0.00           H  
ATOM   1097  H3'  DT A  34     -21.662  -8.495   1.760  2.00  0.00           H  
ATOM   1098  H4'  DT A  34     -21.330  -9.935  -0.400  3.00  0.00           H  
ATOM   1099  H5'  DT A  34     -19.909 -10.825   2.070  2.00  0.00           H  
ATOM   1100  H71  DT A  34     -24.644 -14.241   6.250  6.00  0.00           H  
ATOM   1101  H72  DT A  34     -23.023 -14.802   5.930  3.00  0.00           H  
ATOM   1102  H73  DT A  34     -23.468 -12.972   6.180  6.00  0.00           H  
ATOM   1103 H2''  DT A  34     -24.110  -9.539   2.360  1.00  0.00           H  
ATOM   1104 H5''  DT A  34     -19.533 -11.205   0.440  1.00  0.00           H  
ATOM   1105  P    DT A  35     -24.322  -7.651   0.320  7.00  0.00           P  
ATOM   1106  C5'  DT A  35     -26.049  -9.322  -0.660  5.00  0.00           C  
ATOM   1107  O5'  DT A  35     -25.604  -8.572   0.440  0.00  0.00           O  
ATOM   1108  C4'  DT A  35     -27.221 -10.170  -0.210  3.00  0.00           C  
ATOM   1109  O4'  DT A  35     -26.894 -11.033   0.910  8.00  0.00           O  
ATOM   1110  C3'  DT A  35     -28.498  -9.450   0.320  2.00  0.00           C  
ATOM   1111  O3'  DT A  35     -29.697 -10.144  -0.080  3.00  0.00           O  
ATOM   1112  C2'  DT A  35     -28.309  -9.532   1.850  1.00  0.00           C  
ATOM   1113  C1'  DT A  35     -27.763 -10.964   1.990  1.00  0.00           C  
ATOM   1114  N1   DT A  35     -27.153 -11.311   3.240  0.00  0.00           N  
ATOM   1115  C2   DT A  35     -27.526 -12.555   3.800  9.00  0.00           C  
ATOM   1116  O2   DT A  35     -28.249 -13.396   3.230  2.00  0.00           O  
ATOM   1117  N3   DT A  35     -27.162 -12.897   5.050  8.00  0.00           N  
ATOM   1118  C4   DT A  35     -26.654 -12.007   5.960  1.00  0.00           C  
ATOM   1119  O4   DT A  35     -26.455 -12.335   7.130  9.00  0.00           O  
ATOM   1120  C5   DT A  35     -26.279 -10.737   5.320  4.00  0.00           C  
ATOM   1121  C6   DT A  35     -26.477 -10.408   4.020  4.00  0.00           C  
ATOM   1122  C7   DT A  35     -25.461  -9.832   6.130  1.00  0.00           C  
ATOM   1123  OP1  DT A  35     -24.403  -6.915  -0.930  2.00  0.00           O  
ATOM   1124  OP2  DT A  35     -23.939  -6.941   1.580  3.00  0.00           O1-
ATOM   1125  H3   DT A  35     -27.279 -13.803   5.370  7.00  0.00           H  
ATOM   1126  H6   DT A  35     -26.220  -9.453   3.630  3.00  0.00           H  
ATOM   1127  H1'  DT A  35     -28.577 -11.594   1.770  2.00  0.00           H  
ATOM   1128  H2'  DT A  35     -27.600  -8.747   2.130  6.00  0.00           H  
ATOM   1129  H3'  DT A  35     -28.474  -8.428   0.030  4.00  0.00           H  
ATOM   1130  H4'  DT A  35     -27.552 -10.738  -1.000  0.00  0.00           H  
ATOM   1131  H5'  DT A  35     -25.226  -9.916  -1.050  8.00  0.00           H  
ATOM   1132  H71  DT A  35     -24.697 -10.402   6.710  9.00  0.00           H  
ATOM   1133  H72  DT A  35     -24.874  -9.244   5.420  6.00  0.00           H  
ATOM   1134  H73  DT A  35     -26.015  -9.111   6.690  7.00  0.00           H  
ATOM   1135 H2''  DT A  35     -29.113  -9.352   2.520  0.00  0.00           H  
ATOM   1136 H5''  DT A  35     -26.333  -8.613  -1.370  8.00  0.00           H  
ATOM   1137  P    DA A  36     -30.919  -9.182  -0.500  2.00  0.00           P  
ATOM   1138  C5'  DA A  36     -32.428 -11.326  -0.660  3.00  0.00           C  
ATOM   1139  O5'  DA A  36     -32.062 -10.157   0.060  1.00  0.00           O  
ATOM   1140  C4'  DA A  36     -33.251 -12.378   0.140  0.00  0.00           C  
ATOM   1141  O4'  DA A  36     -32.460 -12.973   1.170  8.00  0.00           O  
ATOM   1142  C3'  DA A  36     -34.519 -11.798   0.790  5.00  0.00           C  
ATOM   1143  O3'  DA A  36     -35.505 -12.854   0.850  5.00  0.00           O  
ATOM   1144  C2'  DA A  36     -33.991 -11.475   2.200  8.00  0.00           C  
ATOM   1145  C1'  DA A  36     -33.024 -12.633   2.400  0.00  0.00           C  
ATOM   1146  N1   DA A  36     -31.199 -13.315   7.010  3.00  0.00           N  
ATOM   1147  C2   DA A  36     -31.843 -14.106   6.240  0.00  0.00           C  
ATOM   1148  N3   DA A  36     -32.126 -14.006   4.960  8.00  0.00           N  
ATOM   1149  C4   DA A  36     -31.651 -12.827   4.550  0.00  0.00           C  
ATOM   1150  C5   DA A  36     -30.951 -11.823   5.240  1.00  0.00           C  
ATOM   1151  C6   DA A  36     -30.697 -12.189   6.500  3.00  0.00           C  
ATOM   1152  N6   DA A  36     -30.047 -11.434   7.330  8.00  0.00           N  
ATOM   1153  N7   DA A  36     -30.554 -10.791   4.370  7.00  0.00           N  
ATOM   1154  C8   DA A  36     -31.094 -11.212   3.250  5.00  0.00           C  
ATOM   1155  N9   DA A  36     -31.920 -12.287   3.300  5.00  0.00           N  
ATOM   1156  OP1  DA A  36     -30.958  -9.163  -1.960  3.00  0.00           O  
ATOM   1157  OP2  DA A  36     -30.936  -7.946   0.270  8.00  0.00           O1-
ATOM   1158  H2   DA A  36     -32.122 -14.992   6.710  0.00  0.00           H  
ATOM   1159  H8   DA A  36     -31.075 -10.545   2.440  1.00  0.00           H  
ATOM   1160  H1'  DA A  36     -33.598 -13.445   2.690  7.00  0.00           H  
ATOM   1161  H2'  DA A  36     -33.497 -10.495   2.240  4.00  0.00           H  
ATOM   1162  H3'  DA A  36     -34.891 -10.967   0.280  7.00  0.00           H  
ATOM   1163  H4'  DA A  36     -33.590 -13.135  -0.570  5.00  0.00           H  
ATOM   1164  H5'  DA A  36     -31.555 -11.729  -1.120  8.00  0.00           H  
ATOM   1165  H61  DA A  36     -29.825 -11.726   8.350  5.00  0.00           H  
ATOM   1166  H62  DA A  36     -29.702 -10.533   6.990  0.00  0.00           H  
ATOM   1167 H2''  DA A  36     -34.801 -11.338   2.920  9.00  0.00           H  
ATOM   1168 H5''  DA A  36     -32.997 -10.941  -1.470  0.00  0.00           H  
ATOM   1169  P    DG A  37     -36.970 -12.552   1.360  9.00  0.00           P  
ATOM   1170  C5'  DG A  37     -36.795 -14.277   3.300  9.00  0.00           C  
ATOM   1171  O5'  DG A  37     -36.934 -12.896   2.950  5.00  0.00           O  
ATOM   1172  C4'  DG A  37     -36.708 -14.448   4.830  7.00  0.00           C  
ATOM   1173  O4'  DG A  37     -35.527 -14.007   5.550  1.00  0.00           O  
ATOM   1174  C3'  DG A  37     -37.929 -13.809   5.550  4.00  0.00           C  
ATOM   1175  O3'  DG A  37     -38.637 -14.836   6.190  9.00  0.00           O  
ATOM   1176  C2'  DG A  37     -37.352 -12.689   6.410  9.00  0.00           C  
ATOM   1177  C1'  DG A  37     -35.995 -13.362   6.730  1.00  0.00           C  
ATOM   1178  N1   DG A  37     -32.684 -12.028  10.380  4.00  0.00           N  
ATOM   1179  C2   DG A  37     -33.441 -13.163  10.220  4.00  0.00           C  
ATOM   1180  N2   DG A  37     -33.542 -14.043  11.190  3.00  0.00           N  
ATOM   1181  N3   DG A  37     -34.183 -13.373   9.170  2.00  0.00           N  
ATOM   1182  C4   DG A  37     -34.167 -12.427   8.210  4.00  0.00           C  
ATOM   1183  C5   DG A  37     -33.433 -11.273   8.260  9.00  0.00           C  
ATOM   1184  C6   DG A  37     -32.567 -11.005   9.450  4.00  0.00           C  
ATOM   1185  O6   DG A  37     -31.769 -10.087   9.610  2.00  0.00           O  
ATOM   1186  N7   DG A  37     -33.586 -10.592   7.040  6.00  0.00           N  
ATOM   1187  C8   DG A  37     -34.519 -11.254   6.380  0.00  0.00           C  
ATOM   1188  N9   DG A  37     -34.914 -12.398   7.070  7.00  0.00           N  
ATOM   1189  OP1  DG A  37     -37.882 -13.576   0.820  5.00  0.00           O  
ATOM   1190  OP2  DG A  37     -37.350 -11.117   1.340  6.00  0.00           O1-
ATOM   1191  H1   DG A  37     -32.121 -11.971  11.170  7.00  0.00           H  
ATOM   1192  H8   DG A  37     -34.886 -10.977   5.360  8.00  0.00           H  
ATOM   1193  H1'  DG A  37     -36.154 -14.113   7.490  7.00  0.00           H  
ATOM   1194  H2'  DG A  37     -37.360 -11.806   5.840  5.00  0.00           H  
ATOM   1195  H21  DG A  37     -33.004 -14.078  12.050  0.00  0.00           H  
ATOM   1196  H3'  DG A  37     -38.526 -13.434   4.690  4.00  0.00           H  
ATOM   1197  H22  DG A  37     -34.167 -14.741  11.000  5.00  0.00           H  
ATOM   1198  H4'  DG A  37     -36.597 -15.529   4.970  0.00  0.00           H  
ATOM   1199  H5'  DG A  37     -35.836 -14.648   2.860  3.00  0.00           H  
ATOM   1200 H2''  DG A  37     -37.905 -12.452   7.370  8.00  0.00           H  
ATOM   1201 H5''  DG A  37     -37.569 -14.872   2.960  1.00  0.00           H  
ATOM   1202  P    DG A  38     -39.780 -14.569   7.320  3.00  0.00           P  
ATOM   1203  C5'  DG A  38     -38.367 -15.492   9.320  8.00  0.00           C  
ATOM   1204  O5'  DG A  38     -38.961 -14.403   8.660  7.00  0.00           O  
ATOM   1205  C4'  DG A  38     -38.205 -15.215  10.840  8.00  0.00           C  
ATOM   1206  O4'  DG A  38     -37.149 -14.282  11.170  5.00  0.00           O  
ATOM   1207  C3'  DG A  38     -39.534 -14.718  11.360  4.00  0.00           C  
ATOM   1208  O3'  DG A  38     -39.898 -15.627  12.330  4.00  0.00           O  
ATOM   1209  C2'  DG A  38     -39.126 -13.259  11.770  0.00  0.00           C  
ATOM   1210  C1'  DG A  38     -37.617 -13.365  12.090  6.00  0.00           C  
ATOM   1211  N1   DG A  38     -33.967 -10.258  14.080  2.00  0.00           N  
ATOM   1212  C2   DG A  38     -34.522 -11.364  14.670  0.00  0.00           C  
ATOM   1213  N2   DG A  38     -34.214 -11.531  15.910  7.00  0.00           N  
ATOM   1214  N3   DG A  38     -35.456 -12.143  14.040  8.00  0.00           N  
ATOM   1215  C4   DG A  38     -35.756 -11.710  12.800  9.00  0.00           C  
ATOM   1216  C5   DG A  38     -35.231 -10.584  12.180  6.00  0.00           C  
ATOM   1217  C6   DG A  38     -34.262  -9.816  12.870  7.00  0.00           C  
ATOM   1218  O6   DG A  38     -33.704  -8.806  12.410  8.00  0.00           O  
ATOM   1219  N7   DG A  38     -35.833 -10.395  10.970  6.00  0.00           N  
ATOM   1220  C8   DG A  38     -36.760 -11.273  10.860  9.00  0.00           C  
ATOM   1221  N9   DG A  38     -36.778 -12.160  11.960  1.00  0.00           N  
ATOM   1222  OP1  DG A  38     -40.553 -15.846   7.410  7.00  0.00           O  
ATOM   1223  OP2  DG A  38     -40.464 -13.309   7.130  1.00  0.00           O1-
ATOM   1224  H1   DG A  38     -33.510  -9.566  14.650  1.00  0.00           H  
ATOM   1225  H8   DG A  38     -37.472 -11.302  10.070  0.00  0.00           H  
ATOM   1226  H1'  DG A  38     -37.639 -13.828  13.110  1.00  0.00           H  
ATOM   1227  H2'  DG A  38     -39.335 -12.674  10.930  2.00  0.00           H  
ATOM   1228  H21  DG A  38     -33.505 -10.957  16.340  5.00  0.00           H  
ATOM   1229  H3'  DG A  38     -40.251 -14.563  10.530  6.00  0.00           H  
ATOM   1230  H22  DG A  38     -34.704 -12.252  16.430  0.00  0.00           H  
ATOM   1231  H4'  DG A  38     -37.882 -16.091  11.380  4.00  0.00           H  
ATOM   1232  H5'  DG A  38     -37.387 -15.899   8.940  0.00  0.00           H  
ATOM   1233 H2''  DG A  38     -39.702 -12.935  12.620  6.00  0.00           H  
ATOM   1234 H5''  DG A  38     -39.061 -16.288   9.210  6.00  0.00           H  
ATOM   1235  P    DG A  39     -41.146 -15.454  13.280  3.00  0.00           P  
ATOM   1236  C5'  DG A  39     -39.709 -15.771  15.460  8.00  0.00           C  
ATOM   1237  O5'  DG A  39     -40.525 -14.960  14.660  9.00  0.00           O  
ATOM   1238  C4'  DG A  39     -39.425 -15.407  16.870  5.00  0.00           C  
ATOM   1239  O4'  DG A  39     -38.533 -14.254  17.020  3.00  0.00           O  
ATOM   1240  C3'  DG A  39     -40.700 -14.934  17.560  3.00  0.00           C  
ATOM   1241  O3'  DG A  39     -40.674 -15.338  18.880  0.00  0.00           O  
ATOM   1242  C2'  DG A  39     -40.657 -13.395  17.370  0.00  0.00           C  
ATOM   1243  C1'  DG A  39     -39.190 -13.054  17.400  5.00  0.00           C  
ATOM   1244  N1   DG A  39     -36.429  -8.667  17.070  9.00  0.00           N  
ATOM   1245  C2   DG A  39     -36.514  -9.532  18.120  3.00  0.00           C  
ATOM   1246  N2   DG A  39     -35.806  -9.362  19.210  4.00  0.00           N  
ATOM   1247  N3   DG A  39     -37.279 -10.672  18.100  5.00  0.00           N  
ATOM   1248  C4   DG A  39     -38.006 -10.762  16.940  8.00  0.00           C  
ATOM   1249  C5   DG A  39     -38.038  -9.919  15.890  0.00  0.00           C  
ATOM   1250  C6   DG A  39     -37.024  -8.886  15.850  4.00  0.00           C  
ATOM   1251  O6   DG A  39     -36.616  -8.243  14.880  2.00  0.00           O  
ATOM   1252  N7   DG A  39     -38.816 -10.349  14.840  4.00  0.00           N  
ATOM   1253  C8   DG A  39     -39.265 -11.483  15.310  9.00  0.00           C  
ATOM   1254  N9   DG A  39     -38.880 -11.781  16.590  5.00  0.00           N  
ATOM   1255  OP1  DG A  39     -41.741 -16.779  13.450  3.00  0.00           O  
ATOM   1256  OP2  DG A  39     -42.039 -14.354  12.870  2.00  0.00           O1-
ATOM   1257  H1   DG A  39     -35.898  -7.797  17.170  6.00  0.00           H  
ATOM   1258  H8   DG A  39     -39.839 -12.168  14.700  8.00  0.00           H  
ATOM   1259  H1'  DG A  39     -39.014 -12.935  18.520  2.00  0.00           H  
ATOM   1260  H2'  DG A  39     -41.193 -13.271  16.460  2.00  0.00           H  
ATOM   1261  H21  DG A  39     -34.983  -8.725  19.150  1.00  0.00           H  
ATOM   1262  H3'  DG A  39     -41.621 -15.301  17.020  2.00  0.00           H  
ATOM   1263  H22  DG A  39     -35.837 -10.021  19.940  4.00  0.00           H  
ATOM   1264  H4'  DG A  39     -38.993 -16.228  17.380  4.00  0.00           H  
ATOM   1265  H5'  DG A  39     -38.799 -15.847  14.910  0.00  0.00           H  
ATOM   1266 H2''  DG A  39     -41.158 -12.870  18.160  8.00  0.00           H  
ATOM   1267 H5''  DG A  39     -40.094 -16.831  15.520  5.00  0.00           H  
ATOM   1268  P    DT A  40     -41.791 -15.008  19.950  4.00  0.00           P  
ATOM   1269  C5'  DT A  40     -40.144 -13.766  21.500  2.00  0.00           C  
ATOM   1270  O5'  DT A  40     -41.245 -13.636  20.590  4.00  0.00           O  
ATOM   1271  C4'  DT A  40     -39.627 -12.425  22.140  3.00  0.00           C  
ATOM   1272  O4'  DT A  40     -39.234 -11.540  21.080  7.00  0.00           O  
ATOM   1273  C3'  DT A  40     -40.629 -11.634  23.040  1.00  0.00           C  
ATOM   1274  O3'  DT A  40     -39.989 -11.028  24.170  5.00  0.00           O  
ATOM   1275  C2'  DT A  40     -41.224 -10.589  22.100  7.00  0.00           C  
ATOM   1276  C1'  DT A  40     -39.892 -10.284  21.240  7.00  0.00           C  
ATOM   1277  N1   DT A  40     -40.239  -9.625  19.900  5.00  0.00           N  
ATOM   1278  C2   DT A  40     -39.424  -8.529  19.570  0.00  0.00           C  
ATOM   1279  O2   DT A  40     -38.571  -8.051  20.330  6.00  0.00           O  
ATOM   1280  N3   DT A  40     -39.702  -7.886  18.390  7.00  0.00           N  
ATOM   1281  C4   DT A  40     -40.604  -8.346  17.470  2.00  0.00           C  
ATOM   1282  O4   DT A  40     -40.762  -7.691  16.470  1.00  0.00           O  
ATOM   1283  C5   DT A  40     -41.404  -9.467  17.870  7.00  0.00           C  
ATOM   1284  C6   DT A  40     -41.223 -10.063  19.050  3.00  0.00           C  
ATOM   1285  C7   DT A  40     -42.474  -9.934  16.830  1.00  0.00           C  
ATOM   1286  OP1  DT A  40     -41.651 -16.030  20.980  2.00  0.00           O  
ATOM   1287  OP2  DT A  40     -43.125 -14.781  19.270  0.00  0.00           O1-
ATOM   1288  H3   DT A  40     -39.156  -7.077  18.130  8.00  0.00           H  
ATOM   1289  H6   DT A  40     -41.836 -10.830  19.440  2.00  0.00           H  
ATOM   1290  H1'  DT A  40     -39.208  -9.688  21.860  9.00  0.00           H  
ATOM   1291  H2'  DT A  40     -42.029 -10.993  21.490  0.00  0.00           H  
ATOM   1292  H3'  DT A  40     -41.473 -12.279  23.400  0.00  0.00           H  
ATOM   1293  H4'  DT A  40     -38.729 -12.652  22.730  0.00  0.00           H  
ATOM   1294  H5'  DT A  40     -39.361 -14.171  20.900  1.00  0.00           H  
ATOM   1295  H71  DT A  40     -41.992 -10.530  15.980  0.00  0.00           H  
ATOM   1296  H72  DT A  40     -43.194 -10.546  17.340  3.00  0.00           H  
ATOM   1297  H73  DT A  40     -42.942  -8.985  16.430  9.00  0.00           H  
ATOM   1298 H2''  DT A  40     -41.545  -9.758  22.700  9.00  0.00           H  
ATOM   1299 H5''  DT A  40     -40.416 -14.337  22.360  1.00  0.00           H  
ATOM   1300  P    DT A  41     -40.685 -10.410  25.450  4.00  0.00           P  
ATOM   1301  C5'  DT A  41     -39.282  -8.176  25.340  6.00  0.00           C  
ATOM   1302  O5'  DT A  41     -40.519  -8.889  25.180  9.00  0.00           O  
ATOM   1303  C4'  DT A  41     -39.455  -6.743  24.770  1.00  0.00           C  
ATOM   1304  O4'  DT A  41     -39.823  -6.835  23.390  4.00  0.00           O  
ATOM   1305  C3'  DT A  41     -40.543  -5.981  25.420  7.00  0.00           C  
ATOM   1306  O3'  DT A  41     -40.193  -4.670  25.890  1.00  0.00           O  
ATOM   1307  C2'  DT A  41     -41.650  -5.849  24.330  3.00  0.00           C  
ATOM   1308  C1'  DT A  41     -40.768  -5.845  23.100  1.00  0.00           C  
ATOM   1309  N1   DT A  41     -41.524  -6.025  21.790  2.00  0.00           N  
ATOM   1310  C2   DT A  41     -41.175  -5.182  20.740  5.00  0.00           C  
ATOM   1311  O2   DT A  41     -40.386  -4.252  20.790  5.00  0.00           O  
ATOM   1312  N3   DT A  41     -41.809  -5.448  19.580  7.00  0.00           N  
ATOM   1313  C4   DT A  41     -42.767  -6.425  19.370  3.00  0.00           C  
ATOM   1314  O4   DT A  41     -43.245  -6.557  18.270  2.00  0.00           O  
ATOM   1315  C5   DT A  41     -43.009  -7.296  20.460  4.00  0.00           C  
ATOM   1316  C6   DT A  41     -42.410  -7.079  21.650  0.00  0.00           C  
ATOM   1317  C7   DT A  41     -43.923  -8.577  20.350  3.00  0.00           C  
ATOM   1318  OP1  DT A  41     -39.899 -10.829  26.650  3.00  0.00           O  
ATOM   1319  OP2  DT A  41     -42.132 -10.679  25.360  0.00  0.00           O1-
ATOM   1320  H3   DT A  41     -41.639  -4.788  18.850  9.00  0.00           H  
ATOM   1321  H6   DT A  41     -42.455  -7.848  22.440  0.00  0.00           H  
ATOM   1322  H1'  DT A  41     -40.232  -4.904  23.110  5.00  0.00           H  
ATOM   1323  H2'  DT A  41     -42.331  -6.656  24.270  4.00  0.00           H  
ATOM   1324  H3'  DT A  41     -41.028  -6.561  26.280  5.00  0.00           H  
ATOM   1325  H4'  DT A  41     -38.404  -6.312  24.850  8.00  0.00           H  
ATOM   1326  H5'  DT A  41     -38.463  -8.738  24.860  9.00  0.00           H  
ATOM   1327  H71  DT A  41     -44.124  -8.978  21.370  1.00  0.00           H  
ATOM   1328  H72  DT A  41     -44.887  -8.149  19.930  9.00  0.00           H  
ATOM   1329  H73  DT A  41     -43.582  -9.288  19.630  2.00  0.00           H  
ATOM   1330 H2''  DT A  41     -42.117  -4.902  24.400  7.00  0.00           H  
ATOM   1331 H5''  DT A  41     -38.977  -8.069  26.450  6.00  0.00           H  
ATOM   1332  P    DA A  42     -41.124  -3.727  26.790  2.00  0.00           P  
ATOM   1333  C5'  DA A  42     -40.261  -1.475  25.920  4.00  0.00           C  
ATOM   1334  O5'  DA A  42     -41.294  -2.440  25.880  4.00  0.00           O  
ATOM   1335  C4'  DA A  42     -40.389  -0.645  24.660  8.00  0.00           C  
ATOM   1336  O4'  DA A  42     -40.687  -1.553  23.560  6.00  0.00           O  
ATOM   1337  C3'  DA A  42     -41.575   0.209  24.820  8.00  0.00           C  
ATOM   1338  O3'  DA A  42     -41.212   1.525  25.120  8.00  0.00           O  
ATOM   1339  C2'  DA A  42     -42.174   0.160  23.400  6.00  0.00           C  
ATOM   1340  C1'  DA A  42     -41.508  -0.991  22.560  6.00  0.00           C  
ATOM   1341  N1   DA A  42     -44.587  -2.390  18.700  5.00  0.00           N  
ATOM   1342  C2   DA A  42     -43.819  -1.312  18.850  1.00  0.00           C  
ATOM   1343  N3   DA A  42     -43.071  -1.068  19.870  7.00  0.00           N  
ATOM   1344  C4   DA A  42     -43.124  -1.967  20.860  0.00  0.00           C  
ATOM   1345  C5   DA A  42     -43.869  -3.145  20.790  0.00  0.00           C  
ATOM   1346  C6   DA A  42     -44.729  -3.231  19.680  6.00  0.00           C  
ATOM   1347  N6   DA A  42     -45.682  -4.152  19.460  5.00  0.00           N  
ATOM   1348  N7   DA A  42     -43.749  -3.929  21.970  1.00  0.00           N  
ATOM   1349  C8   DA A  42     -42.993  -3.130  22.690  5.00  0.00           C  
ATOM   1350  N9   DA A  42     -42.455  -2.017  22.030  9.00  0.00           N  
ATOM   1351  OP1  DA A  42     -40.308  -3.411  27.980  5.00  0.00           O  
ATOM   1352  OP2  DA A  42     -42.374  -4.408  26.950  9.00  0.00           O1-
ATOM   1353  H2   DA A  42     -43.814  -0.576  18.030  0.00  0.00           H  
ATOM   1354  H8   DA A  42     -42.721  -3.280  23.710  5.00  0.00           H  
ATOM   1355  H1'  DA A  42     -40.850  -0.534  21.750  7.00  0.00           H  
ATOM   1356  H2'  DA A  42     -43.215   0.034  23.430  0.00  0.00           H  
ATOM   1357  H3'  DA A  42     -42.354  -0.202  25.480  3.00  0.00           H  
ATOM   1358  H4'  DA A  42     -39.413  -0.177  24.350  8.00  0.00           H  
ATOM   1359  H5'  DA A  42     -39.282  -1.848  26.020  1.00  0.00           H  
ATOM   1360  H61  DA A  42     -46.090  -4.091  18.590  9.00  0.00           H  
ATOM   1361  H62  DA A  42     -45.759  -4.920  20.050  0.00  0.00           H  
ATOM   1362 H2''  DA A  42     -42.047   1.087  22.790  6.00  0.00           H  
ATOM   1363 H5''  DA A  42     -40.448  -0.842  26.790  9.00  0.00           H  
ATOM   1364  P    DG A  43     -42.322   2.642  25.510  4.00  0.00           P  
ATOM   1365  C5'  DG A  43     -41.518   4.251  23.590  1.00  0.00           C  
ATOM   1366  O5'  DG A  43     -42.529   3.456  24.190  7.00  0.00           O  
ATOM   1367  C4'  DG A  43     -41.844   4.697  22.130  7.00  0.00           C  
ATOM   1368  O4'  DG A  43     -42.282   3.519  21.480  8.00  0.00           O  
ATOM   1369  C3'  DG A  43     -42.906   5.772  22.000  2.00  0.00           C  
ATOM   1370  O3'  DG A  43     -42.620   6.622  20.950  1.00  0.00           O  
ATOM   1371  C2'  DG A  43     -44.153   4.979  21.690  9.00  0.00           C  
ATOM   1372  C1'  DG A  43     -43.602   3.771  20.960  8.00  0.00           C  
ATOM   1373  N1   DG A  43     -46.650   0.556  18.530  1.00  0.00           N  
ATOM   1374  C2   DG A  43     -45.667   1.401  17.990  0.00  0.00           C  
ATOM   1375  N2   DG A  43     -45.680   1.610  16.690  6.00  0.00           N  
ATOM   1376  N3   DG A  43     -44.784   2.083  18.720  2.00  0.00           N  
ATOM   1377  C4   DG A  43     -44.967   1.853  20.080  8.00  0.00           C  
ATOM   1378  C5   DG A  43     -45.876   1.033  20.680  4.00  0.00           C  
ATOM   1379  C6   DG A  43     -46.693   0.194  19.840  6.00  0.00           C  
ATOM   1380  O6   DG A  43     -47.429  -0.667  20.150  2.00  0.00           O  
ATOM   1381  N7   DG A  43     -45.777   1.053  22.050  1.00  0.00           N  
ATOM   1382  C8   DG A  43     -44.823   1.946  22.260  0.00  0.00           C  
ATOM   1383  N9   DG A  43     -44.451   2.558  21.130  0.00  0.00           N  
ATOM   1384  OP1  DG A  43     -41.820   3.484  26.620  9.00  0.00           O  
ATOM   1385  OP2  DG A  43     -43.648   1.953  25.750  8.00  0.00           O1-
ATOM   1386  H1   DG A  43     -47.318   0.066  17.870  2.00  0.00           H  
ATOM   1387  H8   DG A  43     -44.465   2.201  23.230  2.00  0.00           H  
ATOM   1388  H1'  DG A  43     -43.557   4.006  19.900  1.00  0.00           H  
ATOM   1389  H2'  DG A  43     -44.700   4.631  22.620  3.00  0.00           H  
ATOM   1390  H21  DG A  43     -46.304   1.059  16.080  4.00  0.00           H  
ATOM   1391  H3'  DG A  43     -42.945   6.343  22.940  4.00  0.00           H  
ATOM   1392  H22  DG A  43     -44.931   2.160  16.380  2.00  0.00           H  
ATOM   1393  H4'  DG A  43     -40.994   5.093  21.660  1.00  0.00           H  
ATOM   1394  H5'  DG A  43     -40.570   3.749  23.470  5.00  0.00           H  
ATOM   1395 H2''  DG A  43     -45.047   5.405  21.140  1.00  0.00           H  
ATOM   1396 H5''  DG A  43     -41.305   5.141  24.120  1.00  0.00           H  
ATOM   1397  P    DG A  44     -43.610   7.845  20.510  0.00  0.00           P  
ATOM   1398  C5'  DG A  44     -44.573   6.532  18.410  5.00  0.00           C  
ATOM   1399  O5'  DG A  44     -44.787   7.239  19.660  7.00  0.00           O  
ATOM   1400  C4'  DG A  44     -45.914   6.242  17.710  5.00  0.00           C  
ATOM   1401  O4'  DG A  44     -46.517   5.167  18.470  5.00  0.00           O  
ATOM   1402  C3'  DG A  44     -46.951   7.380  17.690  2.00  0.00           C  
ATOM   1403  O3'  DG A  44     -47.674   7.333  16.440  1.00  0.00           O  
ATOM   1404  C2'  DG A  44     -47.865   6.960  18.860  7.00  0.00           C  
ATOM   1405  C1'  DG A  44     -47.897   5.470  18.530  1.00  0.00           C  
ATOM   1406  N1   DG A  44     -50.060   0.942  19.110  2.00  0.00           N  
ATOM   1407  C2   DG A  44     -49.926   1.688  17.980  3.00  0.00           C  
ATOM   1408  N2   DG A  44     -50.270   1.183  16.870  5.00  0.00           N  
ATOM   1409  N3   DG A  44     -49.487   2.924  18.010  2.00  0.00           N  
ATOM   1410  C4   DG A  44     -49.110   3.382  19.260  8.00  0.00           C  
ATOM   1411  C5   DG A  44     -49.287   2.759  20.420  6.00  0.00           C  
ATOM   1412  C6   DG A  44     -49.831   1.465  20.400  9.00  0.00           C  
ATOM   1413  O6   DG A  44     -50.089   0.718  21.360  3.00  0.00           O  
ATOM   1414  N7   DG A  44     -48.709   3.455  21.500  1.00  0.00           N  
ATOM   1415  C8   DG A  44     -48.265   4.487  20.860  0.00  0.00           C  
ATOM   1416  N9   DG A  44     -48.464   4.561  19.500  3.00  0.00           N  
ATOM   1417  OP1  DG A  44     -42.817   8.586  19.590  6.00  0.00           O  
ATOM   1418  OP2  DG A  44     -44.137   8.517  21.710  0.00  0.00           O1-
ATOM   1419  H1   DG A  44     -50.400   0.010  19.000  3.00  0.00           H  
ATOM   1420  H8   DG A  44     -47.603   5.182  21.370  8.00  0.00           H  
ATOM   1421  H1'  DG A  44     -48.383   5.355  17.540  9.00  0.00           H  
ATOM   1422  H2'  DG A  44     -47.331   6.961  19.870  0.00  0.00           H  
ATOM   1423  H21  DG A  44     -50.861   0.358  16.970  7.00  0.00           H  
ATOM   1424  H3'  DG A  44     -46.389   8.251  17.900  9.00  0.00           H  
ATOM   1425  H22  DG A  44     -49.967   1.592  16.010  3.00  0.00           H  
ATOM   1426  H4'  DG A  44     -45.901   5.840  16.670  9.00  0.00           H  
ATOM   1427  H5'  DG A  44     -44.002   5.656  18.500  7.00  0.00           H  
ATOM   1428 H2''  DG A  44     -48.786   7.450  18.880  3.00  0.00           H  
ATOM   1429 H5''  DG A  44     -44.043   7.238  17.750  6.00  0.00           H  
ATOM   1430  P   DG3 A  45     -48.639   8.583  16.060  7.00  0.00           P  
ATOM   1431  C5' DG3 A  45     -51.129   7.819  15.880  0.00  0.00           C  
ATOM   1432  O5' DG3 A  45     -50.070   8.489  16.630  1.00  0.00           O  
ATOM   1433  C4' DG3 A  45     -50.879   6.307  15.670  7.00  0.00           C  
ATOM   1434  O4' DG3 A  45     -50.803   5.478  16.840  8.00  0.00           O  
ATOM   1435  C3' DG3 A  45     -52.191   5.758  15.010  1.00  0.00           C  
ATOM   1436  O3' DG3 A  45     -51.946   4.756  14.060  4.00  0.00           O  
ATOM   1437  C2' DG3 A  45     -53.059   5.221  16.210  2.00  0.00           C  
ATOM   1438  C1' DG3 A  45     -51.877   4.585  16.990  3.00  0.00           C  
ATOM   1439  N1  DG3 A  45     -53.613   1.322  20.670  6.00  0.00           N  
ATOM   1440  C2  DG3 A  45     -53.581   1.172  19.340  0.00  0.00           C  
ATOM   1441  N2  DG3 A  45     -54.002   0.052  18.870  2.00  0.00           N  
ATOM   1442  N3  DG3 A  45     -53.104   2.003  18.420  3.00  0.00           N  
ATOM   1443  C4  DG3 A  45     -52.771   3.242  18.970  5.00  0.00           C  
ATOM   1444  C5  DG3 A  45     -52.876   3.503  20.310  3.00  0.00           C  
ATOM   1445  C6  DG3 A  45     -53.205   2.517  21.280  2.00  0.00           C  
ATOM   1446  O6  DG3 A  45     -53.195   2.642  22.500  4.00  0.00           O  
ATOM   1447  N7  DG3 A  45     -52.585   4.869  20.530  3.00  0.00           N  
ATOM   1448  C8  DG3 A  45     -52.280   5.343  19.340  8.00  0.00           C  
ATOM   1449  N9  DG3 A  45     -52.327   4.408  18.380  0.00  0.00           N  
ATOM   1450  OP1 DG3 A  45     -48.692   8.584  14.570  7.00  0.00           O  
ATOM   1451  OP2 DG3 A  45     -48.067   9.797  16.800  3.00  0.00           O  
ATOM   1452 HO3' DG3 A  45     -52.792   4.339  13.850  7.00  0.00           H  
ATOM   1453  H1  DG3 A  45     -53.903   0.469  21.170  7.00  0.00           H  
ATOM   1454  H8  DG3 A  45     -51.894   6.279  19.120  8.00  0.00           H  
ATOM   1455  H1' DG3 A  45     -51.803   3.603  16.500  8.00  0.00           H  
ATOM   1456  H2' DG3 A  45     -53.420   6.078  16.780  5.00  0.00           H  
ATOM   1457  H21 DG3 A  45     -54.558  -0.582  19.410  5.00  0.00           H  
ATOM   1458  H3' DG3 A  45     -52.613   6.642  14.470  4.00  0.00           H  
ATOM   1459  H22 DG3 A  45     -53.555  -0.168  17.970  4.00  0.00           H  
ATOM   1460  H4' DG3 A  45     -50.021   6.221  15.030  9.00  0.00           H  
ATOM   1461  H5' DG3 A  45     -51.246   8.207  14.870  1.00  0.00           H  
ATOM   1462 H2'' DG3 A  45     -53.790   4.498  15.920  5.00  0.00           H  
ATOM   1463 H5'' DG3 A  45     -52.110   8.095  16.340  3.00  0.00           H  
ATOM   1464  C5' DC5 A  46     -57.097  -7.419  22.650  4.00  0.00           C  
ATOM   1465  O5' DC5 A  46     -57.555  -8.724  22.520  9.00  0.00           O  
ATOM   1466  C4' DC5 A  46     -56.756  -6.706  21.320  5.00  0.00           C  
ATOM   1467  O4' DC5 A  46     -56.474  -5.339  21.600  7.00  0.00           O  
ATOM   1468  C3' DC5 A  46     -55.498  -7.267  20.570  2.00  0.00           C  
ATOM   1469  O3' DC5 A  46     -55.726  -7.164  19.140  9.00  0.00           O  
ATOM   1470  C2' DC5 A  46     -54.510  -6.167  20.800  7.00  0.00           C  
ATOM   1471  C1' DC5 A  46     -55.264  -4.911  20.920  1.00  0.00           C  
ATOM   1472  N1  DC5 A  46     -54.646  -3.794  21.660  6.00  0.00           N  
ATOM   1473  C2  DC5 A  46     -54.624  -2.511  21.070  7.00  0.00           C  
ATOM   1474  O2  DC5 A  46     -55.094  -2.327  19.960  2.00  0.00           O  
ATOM   1475  N3  DC5 A  46     -54.112  -1.464  21.720  6.00  0.00           N  
ATOM   1476  C4  DC5 A  46     -53.576  -1.643  22.910  0.00  0.00           C  
ATOM   1477  N4  DC5 A  46     -53.089  -0.600  23.510  7.00  0.00           N  
ATOM   1478  C5  DC5 A  46     -53.554  -2.897  23.540  2.00  0.00           C  
ATOM   1479  C6  DC5 A  46     -54.014  -4.003  22.900  4.00  0.00           C  
ATOM   1480 HO5' DC5 A  46     -58.472  -8.628  22.080  6.00  0.00           H  
ATOM   1481  H5  DC5 A  46     -52.935  -3.153  24.440  7.00  0.00           H  
ATOM   1482  H6  DC5 A  46     -53.824  -4.960  23.260  8.00  0.00           H  
ATOM   1483  H1' DC5 A  46     -55.596  -4.585  19.900  3.00  0.00           H  
ATOM   1484  H2' DC5 A  46     -53.935  -6.318  21.700  2.00  0.00           H  
ATOM   1485  H3' DC5 A  46     -55.265  -8.279  20.940  4.00  0.00           H  
ATOM   1486  H4' DC5 A  46     -57.687  -6.833  20.700  9.00  0.00           H  
ATOM   1487  H41 DC5 A  46     -53.081   0.315  23.080  6.00  0.00           H  
ATOM   1488  H5' DC5 A  46     -56.150  -7.493  23.240  0.00  0.00           H  
ATOM   1489  H42 DC5 A  46     -52.403  -0.713  24.280  9.00  0.00           H  
ATOM   1490 H2'' DC5 A  46     -53.716  -6.167  20.020  1.00  0.00           H  
ATOM   1491 H5'' DC5 A  46     -57.763  -6.786  23.210  5.00  0.00           H  
ATOM   1492  P    DC A  47     -54.783  -7.843  18.110  9.00  0.00           P  
ATOM   1493  C5'  DC A  47     -55.252  -6.021  16.390  8.00  0.00           C  
ATOM   1494  O5'  DC A  47     -54.324  -6.664  17.130  0.00  0.00           O  
ATOM   1495  C4'  DC A  47     -54.787  -4.905  15.470  0.00  0.00           C  
ATOM   1496  O4'  DC A  47     -54.495  -3.673  16.170  3.00  0.00           O  
ATOM   1497  C3'  DC A  47     -53.591  -5.183  14.600  8.00  0.00           C  
ATOM   1498  O3'  DC A  47     -53.710  -4.385  13.470  2.00  0.00           O  
ATOM   1499  C2'  DC A  47     -52.474  -4.714  15.450  7.00  0.00           C  
ATOM   1500  C1'  DC A  47     -53.078  -3.460  16.160  6.00  0.00           C  
ATOM   1501  N1   DC A  47     -52.589  -3.108  17.490  8.00  0.00           N  
ATOM   1502  C2   DC A  47     -51.867  -1.934  17.690  8.00  0.00           C  
ATOM   1503  O2   DC A  47     -51.689  -1.118  16.830  6.00  0.00           O  
ATOM   1504  N3   DC A  47     -51.463  -1.592  18.890  4.00  0.00           N  
ATOM   1505  C4   DC A  47     -51.499  -2.445  19.860  6.00  0.00           C  
ATOM   1506  N4   DC A  47     -51.031  -2.010  20.940  8.00  0.00           N  
ATOM   1507  C5   DC A  47     -52.115  -3.728  19.720  6.00  0.00           C  
ATOM   1508  C6   DC A  47     -52.632  -3.971  18.520  7.00  0.00           C  
ATOM   1509  OP1  DC A  47     -55.518  -8.800  17.330  5.00  0.00           O  
ATOM   1510  OP2  DC A  47     -53.555  -8.264  18.840  5.00  0.00           O1-
ATOM   1511  H5   DC A  47     -51.982  -4.536  20.420  6.00  0.00           H  
ATOM   1512  H6   DC A  47     -53.266  -4.865  18.370  9.00  0.00           H  
ATOM   1513  H1'  DC A  47     -52.847  -2.587  15.610  1.00  0.00           H  
ATOM   1514  H2'  DC A  47     -52.009  -5.405  16.170  6.00  0.00           H  
ATOM   1515  H3'  DC A  47     -53.589  -6.198  14.400  3.00  0.00           H  
ATOM   1516  H4'  DC A  47     -55.577  -4.602  14.750  7.00  0.00           H  
ATOM   1517  H41  DC A  47     -50.581  -1.136  20.960  8.00  0.00           H  
ATOM   1518  H5'  DC A  47     -56.043  -5.651  17.050  4.00  0.00           H  
ATOM   1519  H42  DC A  47     -50.878  -2.689  21.750  6.00  0.00           H  
ATOM   1520 H2''  DC A  47     -51.661  -4.347  14.860  4.00  0.00           H  
ATOM   1521 H5''  DC A  47     -55.757  -6.843  15.820  4.00  0.00           H  
ATOM   1522  P    DC A  48     -52.900  -4.672  12.080  8.00  0.00           P  
ATOM   1523  C5'  DC A  48     -50.452  -3.823  11.470  4.00  0.00           C  
ATOM   1524  O5'  DC A  48     -51.601  -3.813  12.280  1.00  0.00           O  
ATOM   1525  C4'  DC A  48     -49.922  -2.348  11.220  5.00  0.00           C  
ATOM   1526  O4'  DC A  48     -49.846  -1.571  12.430  2.00  0.00           O  
ATOM   1527  C3'  DC A  48     -48.522  -2.307  10.690  6.00  0.00           C  
ATOM   1528  O3'  DC A  48     -48.275  -1.116   9.930  9.00  0.00           O  
ATOM   1529  C2'  DC A  48     -47.715  -2.394  11.960  9.00  0.00           C  
ATOM   1530  C1'  DC A  48     -48.520  -1.410  12.840  0.00  0.00           C  
ATOM   1531  N1   DC A  48     -48.475  -1.706  14.320  8.00  0.00           N  
ATOM   1532  C2   DC A  48     -47.826  -0.892  15.240  9.00  0.00           C  
ATOM   1533  O2   DC A  48     -47.366   0.188  14.930  3.00  0.00           O  
ATOM   1534  N3   DC A  48     -47.733  -1.220  16.570  8.00  0.00           N  
ATOM   1535  C4   DC A  48     -48.201  -2.364  17.010  0.00  0.00           C  
ATOM   1536  N4   DC A  48     -48.285  -2.431  18.300  0.00  0.00           N  
ATOM   1537  C5   DC A  48     -48.849  -3.254  16.140  4.00  0.00           C  
ATOM   1538  C6   DC A  48     -48.979  -2.930  14.800  7.00  0.00           C  
ATOM   1539  OP1  DC A  48     -53.693  -3.979  11.080  8.00  0.00           O  
ATOM   1540  OP2  DC A  48     -52.464  -6.048  11.900  6.00  0.00           O1-
ATOM   1541  H5   DC A  48     -49.237  -4.168  16.580  7.00  0.00           H  
ATOM   1542  H6   DC A  48     -49.496  -3.541  14.110  6.00  0.00           H  
ATOM   1543  H1'  DC A  48     -48.107  -0.378  12.630  7.00  0.00           H  
ATOM   1544  H2'  DC A  48     -47.643  -3.430  12.370  5.00  0.00           H  
ATOM   1545  H3'  DC A  48     -48.421  -3.107  10.030  4.00  0.00           H  
ATOM   1546  H4'  DC A  48     -50.603  -1.862  10.450  1.00  0.00           H  
ATOM   1547  H41  DC A  48     -47.960  -1.645  18.840  0.00  0.00           H  
ATOM   1548  H5'  DC A  48     -50.700  -4.400  10.550  7.00  0.00           H  
ATOM   1549  H42  DC A  48     -48.856  -3.099  18.730  4.00  0.00           H  
ATOM   1550 H2''  DC A  48     -46.726  -2.093  11.860  9.00  0.00           H  
ATOM   1551 H5''  DC A  48     -49.714  -4.380  12.030  7.00  0.00           H  
ATOM   1552  P    DT A  49     -47.056  -1.068   8.810  5.00  0.00           P  
ATOM   1553  C5'  DT A  49     -45.517   0.256  10.390  5.00  0.00           C  
ATOM   1554  O5'  DT A  49     -45.840  -0.936   9.670  6.00  0.00           O  
ATOM   1555  C4'  DT A  49     -44.373  -0.054  11.420  1.00  0.00           C  
ATOM   1556  O4'  DT A  49     -44.763  -0.775  12.560  1.00  0.00           O  
ATOM   1557  C3'  DT A  49     -43.257  -0.894  10.700  3.00  0.00           C  
ATOM   1558  O3'  DT A  49     -41.895  -0.537  10.950  0.00  0.00           O  
ATOM   1559  C2'  DT A  49     -43.464  -2.273  11.370  8.00  0.00           C  
ATOM   1560  C1'  DT A  49     -43.707  -1.759  12.810  4.00  0.00           C  
ATOM   1561  N1   DT A  49     -44.238  -2.868  13.770  6.00  0.00           N  
ATOM   1562  C2   DT A  49     -44.334  -2.403  15.110  3.00  0.00           C  
ATOM   1563  O2   DT A  49     -43.776  -1.385  15.490  2.00  0.00           O  
ATOM   1564  N3   DT A  49     -45.097  -3.128  15.930  7.00  0.00           N  
ATOM   1565  C4   DT A  49     -45.700  -4.344  15.650  1.00  0.00           C  
ATOM   1566  O4   DT A  49     -46.323  -4.871  16.550  2.00  0.00           O  
ATOM   1567  C5   DT A  49     -45.520  -4.786  14.290  0.00  0.00           C  
ATOM   1568  C6   DT A  49     -44.874  -4.016  13.340  4.00  0.00           C  
ATOM   1569  C7   DT A  49     -46.095  -6.106  13.870  1.00  0.00           C  
ATOM   1570  OP1  DT A  49     -47.165   0.200   7.990  1.00  0.00           O  
ATOM   1571  OP2  DT A  49     -46.946  -2.384   8.190  4.00  0.00           O1-
ATOM   1572  H3   DT A  49     -45.043  -2.783  16.870  1.00  0.00           H  
ATOM   1573  H6   DT A  49     -44.801  -4.371  12.340  2.00  0.00           H  
ATOM   1574  H1'  DT A  49     -42.837  -1.356  13.260  0.00  0.00           H  
ATOM   1575  H2'  DT A  49     -44.346  -2.739  10.920  1.00  0.00           H  
ATOM   1576  H3'  DT A  49     -43.376  -1.004   9.630  9.00  0.00           H  
ATOM   1577  H4'  DT A  49     -43.981   0.908  11.680  6.00  0.00           H  
ATOM   1578  H5'  DT A  49     -46.338   0.693  10.950  0.00  0.00           H  
ATOM   1579  H71  DT A  49     -47.159  -6.013  13.940  3.00  0.00           H  
ATOM   1580  H72  DT A  49     -45.751  -6.455  12.920  5.00  0.00           H  
ATOM   1581  H73  DT A  49     -45.860  -6.905  14.560  6.00  0.00           H  
ATOM   1582 H2''  DT A  49     -42.494  -2.804  11.200  3.00  0.00           H  
ATOM   1583 H5''  DT A  49     -45.115   0.933   9.570  5.00  0.00           H  
ATOM   1584  P    DA A  50     -41.097   0.369  10.000  1.00  0.00           P  
ATOM   1585  C5'  DA A  50     -40.338   1.929  11.880  5.00  0.00           C  
ATOM   1586  O5'  DA A  50     -40.015   0.845  10.980  0.00  0.00           O  
ATOM   1587  C4'  DA A  50     -39.517   1.850  13.190  0.00  0.00           C  
ATOM   1588  O4'  DA A  50     -40.047   0.926  14.120  5.00  0.00           O  
ATOM   1589  C3'  DA A  50     -38.027   1.436  13.130  1.00  0.00           C  
ATOM   1590  O3'  DA A  50     -37.439   2.158  14.200  8.00  0.00           O  
ATOM   1591  C2'  DA A  50     -37.996  -0.061  13.350  8.00  0.00           C  
ATOM   1592  C1'  DA A  50     -39.125  -0.062  14.440  1.00  0.00           C  
ATOM   1593  N1   DA A  50     -41.616  -3.385  17.410  6.00  0.00           N  
ATOM   1594  C2   DA A  50     -40.969  -2.248  17.720  7.00  0.00           C  
ATOM   1595  N3   DA A  50     -40.354  -1.416  16.870  9.00  0.00           N  
ATOM   1596  C4   DA A  50     -40.382  -1.878  15.590  6.00  0.00           C  
ATOM   1597  C5   DA A  50     -40.946  -3.056  15.140  2.00  0.00           C  
ATOM   1598  C6   DA A  50     -41.565  -3.794  16.180  2.00  0.00           C  
ATOM   1599  N6   DA A  50     -42.141  -4.991  15.970  8.00  0.00           N  
ATOM   1600  N7   DA A  50     -40.793  -3.236  13.760  3.00  0.00           N  
ATOM   1601  C8   DA A  50     -40.203  -2.128  13.400  3.00  0.00           C  
ATOM   1602  N9   DA A  50     -39.943  -1.257  14.440  6.00  0.00           N  
ATOM   1603  OP1  DA A  50     -41.884   1.499   9.510  2.00  0.00           O  
ATOM   1604  OP2  DA A  50     -40.487  -0.411   8.960  9.00  0.00           O1-
ATOM   1605  H2   DA A  50     -41.039  -1.815  18.790  0.00  0.00           H  
ATOM   1606  H8   DA A  50     -40.077  -1.953  12.330  0.00  0.00           H  
ATOM   1607  H1'  DA A  50     -38.779   0.043  15.430  2.00  0.00           H  
ATOM   1608  H2'  DA A  50     -38.246  -0.664  12.500  7.00  0.00           H  
ATOM   1609  H3'  DA A  50     -37.660   1.658  12.170  0.00  0.00           H  
ATOM   1610  H4'  DA A  50     -39.620   2.783  13.630  9.00  0.00           H  
ATOM   1611  H5'  DA A  50     -41.401   1.899  12.190  6.00  0.00           H  
ATOM   1612  H61  DA A  50     -42.634  -5.323  16.760  8.00  0.00           H  
ATOM   1613  H62  DA A  50     -41.991  -5.598  15.150  5.00  0.00           H  
ATOM   1614 H2''  DA A  50     -37.076  -0.497  13.660  8.00  0.00           H  
ATOM   1615 H5''  DA A  50     -40.208   2.908  11.330  3.00  0.00           H  
ATOM   1616  P    DA A  51     -35.884   2.240  14.510  1.00  0.00           P  
ATOM   1617  C5'  DA A  51     -36.143   1.957  17.110  3.00  0.00           C  
ATOM   1618  O5'  DA A  51     -35.723   1.400  15.890  0.00  0.00           O  
ATOM   1619  C4'  DA A  51     -35.805   1.067  18.350  8.00  0.00           C  
ATOM   1620  O4'  DA A  51     -36.599  -0.107  18.320  9.00  0.00           O  
ATOM   1621  C3'  DA A  51     -34.380   0.635  18.560  4.00  0.00           C  
ATOM   1622  O3'  DA A  51     -34.085   0.449  19.930  5.00  0.00           O  
ATOM   1623  C2'  DA A  51     -34.380  -0.830  17.950  1.00  0.00           C  
ATOM   1624  C1'  DA A  51     -35.766  -1.267  18.290  6.00  0.00           C  
ATOM   1625  N1   DA A  51     -38.565  -5.545  17.620  2.00  0.00           N  
ATOM   1626  C2   DA A  51     -38.208  -4.865  18.640  9.00  0.00           C  
ATOM   1627  N3   DA A  51     -37.469  -3.837  18.780  4.00  0.00           N  
ATOM   1628  C4   DA A  51     -37.191  -3.317  17.580  1.00  0.00           C  
ATOM   1629  C5   DA A  51     -37.515  -3.873  16.340  1.00  0.00           C  
ATOM   1630  C6   DA A  51     -38.254  -5.071  16.390  9.00  0.00           C  
ATOM   1631  N6   DA A  51     -38.626  -5.836  15.350  8.00  0.00           N  
ATOM   1632  N7   DA A  51     -37.087  -3.059  15.300  9.00  0.00           N  
ATOM   1633  C8   DA A  51     -36.447  -2.083  15.930  1.00  0.00           C  
ATOM   1634  N9   DA A  51     -36.444  -2.170  17.320  8.00  0.00           N  
ATOM   1635  OP1  DA A  51     -35.605   3.655  14.920  9.00  0.00           O  
ATOM   1636  OP2  DA A  51     -35.059   1.616  13.500  1.00  0.00           O1-
ATOM   1637  H2   DA A  51     -38.366  -5.325  19.510  4.00  0.00           H  
ATOM   1638  H8   DA A  51     -35.955  -1.312  15.440  4.00  0.00           H  
ATOM   1639  H1'  DA A  51     -35.821  -1.773  19.240  9.00  0.00           H  
ATOM   1640  H2'  DA A  51     -34.343  -0.810  16.910  3.00  0.00           H  
ATOM   1641  H3'  DA A  51     -33.665   1.341  18.210  2.00  0.00           H  
ATOM   1642  H4'  DA A  51     -36.111   1.672  19.200  6.00  0.00           H  
ATOM   1643  H5'  DA A  51     -37.243   2.180  17.020  4.00  0.00           H  
ATOM   1644  H61  DA A  51     -39.416  -6.461  15.580  5.00  0.00           H  
ATOM   1645  H62  DA A  51     -38.438  -5.564  14.390  2.00  0.00           H  
ATOM   1646 H2''  DA A  51     -33.681  -1.562  18.450  0.00  0.00           H  
ATOM   1647 H5''  DA A  51     -35.685   2.893  17.270  4.00  0.00           H  
ATOM   1648  P    DC A  52     -32.536   0.212  20.440  6.00  0.00           P  
ATOM   1649  C5'  DC A  52     -33.054  -2.058  21.680  5.00  0.00           C  
ATOM   1650  O5'  DC A  52     -32.393  -1.353  20.610  4.00  0.00           O  
ATOM   1651  C4'  DC A  52     -32.902  -3.538  21.580  6.00  0.00           C  
ATOM   1652  O4'  DC A  52     -33.639  -4.060  20.450  0.00  0.00           O  
ATOM   1653  C3'  DC A  52     -31.402  -3.941  21.450  7.00  0.00           C  
ATOM   1654  O3'  DC A  52     -31.315  -5.054  22.250  5.00  0.00           O  
ATOM   1655  C2'  DC A  52     -31.341  -4.349  19.970  2.00  0.00           C  
ATOM   1656  C1'  DC A  52     -32.783  -4.964  19.840  7.00  0.00           C  
ATOM   1657  N1   DC A  52     -33.367  -5.154  18.470  2.00  0.00           N  
ATOM   1658  C2   DC A  52     -34.074  -6.314  18.290  6.00  0.00           C  
ATOM   1659  O2   DC A  52     -34.517  -6.970  19.170  8.00  0.00           O  
ATOM   1660  N3   DC A  52     -34.725  -6.476  17.130  7.00  0.00           N  
ATOM   1661  C4   DC A  52     -34.558  -5.630  16.130  2.00  0.00           C  
ATOM   1662  N4   DC A  52     -35.107  -5.924  14.960  9.00  0.00           N  
ATOM   1663  C5   DC A  52     -33.687  -4.484  16.180  7.00  0.00           C  
ATOM   1664  C6   DC A  52     -33.066  -4.309  17.380  6.00  0.00           C  
ATOM   1665  OP1  DC A  52     -32.369   0.898  21.740  4.00  0.00           O  
ATOM   1666  OP2  DC A  52     -31.624   0.522  19.330  7.00  0.00           O1-
ATOM   1667  H5   DC A  52     -33.574  -3.894  15.250  9.00  0.00           H  
ATOM   1668  H6   DC A  52     -32.339  -3.554  17.500  7.00  0.00           H  
ATOM   1669  H1'  DC A  52     -32.778  -5.965  20.420  7.00  0.00           H  
ATOM   1670  H2'  DC A  52     -31.274  -3.516  19.250  9.00  0.00           H  
ATOM   1671  H3'  DC A  52     -30.774  -3.133  21.810  0.00  0.00           H  
ATOM   1672  H4'  DC A  52     -33.356  -3.902  22.500  4.00  0.00           H  
ATOM   1673  H41  DC A  52     -35.799  -6.663  14.910  7.00  0.00           H  
ATOM   1674  H5'  DC A  52     -34.132  -1.864  21.680  8.00  0.00           H  
ATOM   1675  H42  DC A  52     -34.784  -5.498  14.110  7.00  0.00           H  
ATOM   1676 H2''  DC A  52     -30.537  -5.075  19.850  5.00  0.00           H  
ATOM   1677 H5''  DC A  52     -32.626  -1.761  22.670  7.00  0.00           H  
ATOM   1678  P    DC A  53     -29.848  -5.410  22.860  9.00  0.00           P  
ATOM   1679  C5'  DC A  53     -28.561  -7.180  21.320  4.00  0.00           C  
ATOM   1680  O5'  DC A  53     -28.951  -5.830  21.560  5.00  0.00           O  
ATOM   1681  C4'  DC A  53     -29.783  -8.096  20.910  2.00  0.00           C  
ATOM   1682  O4'  DC A  53     -30.661  -7.577  19.930  1.00  0.00           O  
ATOM   1683  C3'  DC A  53     -29.368  -9.582  20.570  7.00  0.00           C  
ATOM   1684  O3'  DC A  53     -30.308 -10.507  21.260  5.00  0.00           O  
ATOM   1685  C2'  DC A  53     -29.745  -9.657  19.130  8.00  0.00           C  
ATOM   1686  C1'  DC A  53     -30.857  -8.626  19.040  7.00  0.00           C  
ATOM   1687  N1   DC A  53     -31.107  -8.179  17.650  1.00  0.00           N  
ATOM   1688  C2   DC A  53     -32.083  -8.898  16.980  3.00  0.00           C  
ATOM   1689  O2   DC A  53     -32.684  -9.842  17.520  6.00  0.00           O  
ATOM   1690  N3   DC A  53     -32.324  -8.567  15.690  1.00  0.00           N  
ATOM   1691  C4   DC A  53     -31.659  -7.521  15.150  4.00  0.00           C  
ATOM   1692  N4   DC A  53     -32.079  -7.162  13.950  5.00  0.00           N  
ATOM   1693  C5   DC A  53     -30.701  -6.779  15.830  4.00  0.00           C  
ATOM   1694  C6   DC A  53     -30.447  -7.099  17.130  2.00  0.00           C  
ATOM   1695  OP1  DC A  53     -30.121  -6.618  23.690  1.00  0.00           O  
ATOM   1696  OP2  DC A  53     -29.262  -4.227  23.520  0.00  0.00           O1-
ATOM   1697  H5   DC A  53     -30.228  -5.929  15.420  4.00  0.00           H  
ATOM   1698  H6   DC A  53     -29.732  -6.556  17.690  4.00  0.00           H  
ATOM   1699  H1'  DC A  53     -31.739  -9.144  19.420  5.00  0.00           H  
ATOM   1700  H2'  DC A  53     -28.948  -9.239  18.580  5.00  0.00           H  
ATOM   1701  H3'  DC A  53     -28.311  -9.803  20.750  8.00  0.00           H  
ATOM   1702  H4'  DC A  53     -30.424  -8.290  21.790  6.00  0.00           H  
ATOM   1703  H41  DC A  53     -32.720  -7.811  13.490  7.00  0.00           H  
ATOM   1704  H5'  DC A  53     -28.006  -7.741  22.070  6.00  0.00           H  
ATOM   1705  H42  DC A  53     -31.816  -6.254  13.520  7.00  0.00           H  
ATOM   1706 H2''  DC A  53     -30.092 -10.603  18.860  2.00  0.00           H  
ATOM   1707 H5''  DC A  53     -27.918  -7.305  20.470  4.00  0.00           H  
ATOM   1708  P    DC A  54     -29.995 -12.070  21.550  2.00  0.00           P  
ATOM   1709  C5'  DC A  54     -30.107 -13.871  19.560  7.00  0.00           C  
ATOM   1710  O5'  DC A  54     -30.784 -12.983  20.420  1.00  0.00           O  
ATOM   1711  C4'  DC A  54     -31.017 -14.310  18.420  0.00  0.00           C  
ATOM   1712  O4'  DC A  54     -31.108 -13.126  17.660  2.00  0.00           O  
ATOM   1713  C3'  DC A  54     -30.314 -15.361  17.540  3.00  0.00           C  
ATOM   1714  O3'  DC A  54     -31.269 -16.426  17.250  5.00  0.00           O  
ATOM   1715  C2'  DC A  54     -29.946 -14.673  16.230  2.00  0.00           C  
ATOM   1716  C1'  DC A  54     -31.068 -13.610  16.290  8.00  0.00           C  
ATOM   1717  N1   DC A  54     -30.928 -12.545  15.270  0.00  0.00           N  
ATOM   1718  C2   DC A  54     -31.460 -12.707  13.970  0.00  0.00           C  
ATOM   1719  O2   DC A  54     -32.103 -13.643  13.620  2.00  0.00           O  
ATOM   1720  N3   DC A  54     -31.405 -11.732  13.040  8.00  0.00           N  
ATOM   1721  C4   DC A  54     -30.748 -10.646  13.380  5.00  0.00           C  
ATOM   1722  N4   DC A  54     -30.758  -9.672  12.520  0.00  0.00           N  
ATOM   1723  C5   DC A  54     -29.992 -10.490  14.600  1.00  0.00           C  
ATOM   1724  C6   DC A  54     -30.141 -11.494  15.520  3.00  0.00           C  
ATOM   1725  OP1  DC A  54     -30.586 -12.381  22.880  0.00  0.00           O  
ATOM   1726  OP2  DC A  54     -28.546 -12.264  21.430  0.00  0.00           O1-
ATOM   1727  H5   DC A  54     -29.346  -9.594  14.800  1.00  0.00           H  
ATOM   1728  H6   DC A  54     -29.613 -11.509  16.440  6.00  0.00           H  
ATOM   1729  H1'  DC A  54     -32.040 -14.120  15.980  3.00  0.00           H  
ATOM   1730  H2'  DC A  54     -28.947 -14.138  16.430  9.00  0.00           H  
ATOM   1731  H3'  DC A  54     -29.430 -15.665  18.020  9.00  0.00           H  
ATOM   1732  H4'  DC A  54     -31.979 -14.655  18.800  5.00  0.00           H  
ATOM   1733  H41  DC A  54     -31.379  -9.807  11.750  3.00  0.00           H  
ATOM   1734  H5'  DC A  54     -29.754 -14.687  20.230  8.00  0.00           H  
ATOM   1735  H42  DC A  54     -30.206  -8.865  12.650  4.00  0.00           H  
ATOM   1736 H2''  DC A  54     -29.879 -15.209  15.290  5.00  0.00           H  
ATOM   1737 H5''  DC A  54     -29.229 -13.430  19.100  2.00  0.00           H  
ATOM   1738  P    DT A  55     -30.898 -17.849  16.670  8.00  0.00           P  
ATOM   1739  C5'  DT A  55     -32.766 -18.122  14.910  2.00  0.00           C  
ATOM   1740  O5'  DT A  55     -31.406 -17.907  15.220  2.00  0.00           O  
ATOM   1741  C4'  DT A  55     -32.960 -18.514  13.450  7.00  0.00           C  
ATOM   1742  O4'  DT A  55     -32.753 -17.343  12.670  0.00  0.00           O  
ATOM   1743  C3'  DT A  55     -31.944 -19.588  13.050  7.00  0.00           C  
ATOM   1744  O3'  DT A  55     -32.675 -20.582  12.380  2.00  0.00           O  
ATOM   1745  C2'  DT A  55     -30.929 -18.826  12.150  1.00  0.00           C  
ATOM   1746  C1'  DT A  55     -31.832 -17.696  11.650  4.00  0.00           C  
ATOM   1747  N1   DT A  55     -31.033 -16.522  11.220  4.00  0.00           N  
ATOM   1748  C2   DT A  55     -31.166 -16.098   9.900  5.00  0.00           C  
ATOM   1749  O2   DT A  55     -31.775 -16.752   9.090  9.00  0.00           O  
ATOM   1750  N3   DT A  55     -30.655 -14.788   9.590  9.00  0.00           N  
ATOM   1751  C4   DT A  55     -29.783 -14.118  10.470  4.00  0.00           C  
ATOM   1752  O4   DT A  55     -29.223 -13.140   9.970  6.00  0.00           O  
ATOM   1753  C5   DT A  55     -29.507 -14.842  11.780  9.00  0.00           C  
ATOM   1754  C6   DT A  55     -30.215 -15.944  12.140  2.00  0.00           C  
ATOM   1755  C7   DT A  55     -28.542 -14.272  12.830  2.00  0.00           C  
ATOM   1756  OP1  DT A  55     -31.749 -18.878  17.380  9.00  0.00           O  
ATOM   1757  OP2  DT A  55     -29.403 -18.053  16.790  0.00  0.00           O1-
ATOM   1758  H3   DT A  55     -30.780 -14.370   8.670  7.00  0.00           H  
ATOM   1759  H6   DT A  55     -30.322 -16.363  13.130  0.00  0.00           H  
ATOM   1760  H1'  DT A  55     -32.399 -18.240  10.920  9.00  0.00           H  
ATOM   1761  H2'  DT A  55     -30.110 -18.401  12.760  9.00  0.00           H  
ATOM   1762  H3'  DT A  55     -31.338 -19.933  13.860  0.00  0.00           H  
ATOM   1763  H4'  DT A  55     -33.936 -18.885  13.250  2.00  0.00           H  
ATOM   1764  H5'  DT A  55     -33.418 -17.302  15.170  9.00  0.00           H  
ATOM   1765  H71  DT A  55     -27.699 -13.864  12.200  5.00  0.00           H  
ATOM   1766  H72  DT A  55     -28.985 -13.407  13.330  9.00  0.00           H  
ATOM   1767  H73  DT A  55     -28.252 -14.920  13.620  4.00  0.00           H  
ATOM   1768 H2''  DT A  55     -30.387 -19.395  11.370  0.00  0.00           H  
ATOM   1769 H5''  DT A  55     -33.175 -18.916  15.550  6.00  0.00           H  
ATOM   1770  P    DA A  56     -32.171 -22.055  11.870  8.00  0.00           P  
ATOM   1771  C5'  DA A  56     -32.733 -21.697   9.380  8.00  0.00           C  
ATOM   1772  O5'  DA A  56     -31.738 -21.775  10.410  3.00  0.00           O  
ATOM   1773  C4'  DA A  56     -32.244 -21.330   7.980  0.00  0.00           C  
ATOM   1774  O4'  DA A  56     -31.679 -20.001   7.970  1.00  0.00           O  
ATOM   1775  C3'  DA A  56     -31.237 -22.312   7.450  3.00  0.00           C  
ATOM   1776  O3'  DA A  56     -31.663 -22.620   6.120  9.00  0.00           O  
ATOM   1777  C2'  DA A  56     -29.908 -21.511   7.430  3.00  0.00           C  
ATOM   1778  C1'  DA A  56     -30.447 -20.072   7.240  2.00  0.00           C  
ATOM   1779  N1   DA A  56     -27.692 -15.593   6.350  9.00  0.00           N  
ATOM   1780  C2   DA A  56     -28.569 -16.207   5.580  0.00  0.00           C  
ATOM   1781  N3   DA A  56     -29.236 -17.354   5.860  2.00  0.00           N  
ATOM   1782  C4   DA A  56     -28.857 -17.947   7.050  8.00  0.00           C  
ATOM   1783  C5   DA A  56     -28.059 -17.355   7.990  7.00  0.00           C  
ATOM   1784  C6   DA A  56     -27.462 -16.116   7.550  2.00  0.00           C  
ATOM   1785  N6   DA A  56     -26.831 -15.271   8.300  0.00  0.00           N  
ATOM   1786  N7   DA A  56     -28.082 -18.111   9.190  9.00  0.00           N  
ATOM   1787  C8   DA A  56     -28.915 -19.097   8.950  0.00  0.00           C  
ATOM   1788  N9   DA A  56     -29.420 -19.073   7.730  5.00  0.00           N  
ATOM   1789  OP1  DA A  56     -33.397 -22.792  11.990  4.00  0.00           O  
ATOM   1790  OP2  DA A  56     -30.937 -22.402  12.610  9.00  0.00           O1-
ATOM   1791  H2   DA A  56     -28.694 -15.838   4.580  4.00  0.00           H  
ATOM   1792  H8   DA A  56     -29.206 -19.806   9.710  5.00  0.00           H  
ATOM   1793  H1'  DA A  56     -30.779 -19.845   6.250  5.00  0.00           H  
ATOM   1794  H2'  DA A  56     -29.431 -21.540   8.420  3.00  0.00           H  
ATOM   1795  H3'  DA A  56     -31.169 -23.151   8.100  3.00  0.00           H  
ATOM   1796  H4'  DA A  56     -33.082 -21.331   7.180  0.00  0.00           H  
ATOM   1797  H5'  DA A  56     -33.579 -21.005   9.680  5.00  0.00           H  
ATOM   1798  H61  DA A  56     -26.696 -14.371   7.870  6.00  0.00           H  
ATOM   1799  H62  DA A  56     -26.842 -15.443   9.250  2.00  0.00           H  
ATOM   1800 H2''  DA A  56     -29.204 -21.867   6.620  3.00  0.00           H  
ATOM   1801 H5''  DA A  56     -33.114 -22.737   9.370  2.00  0.00           H  
ATOM   1802  P    DA A  57     -31.115 -23.847   5.330  9.00  0.00           P  
ATOM   1803  C5'  DA A  57     -29.633 -22.714   3.560  6.00  0.00           C  
ATOM   1804  O5'  DA A  57     -29.699 -23.425   4.810  4.00  0.00           O  
ATOM   1805  C4'  DA A  57     -28.248 -22.156   3.170  9.00  0.00           C  
ATOM   1806  O4'  DA A  57     -27.820 -21.256   4.180  4.00  0.00           O  
ATOM   1807  C3'  DA A  57     -27.101 -23.177   3.070  9.00  0.00           C  
ATOM   1808  O3'  DA A  57     -26.176 -22.585   2.130  9.00  0.00           O  
ATOM   1809  C2'  DA A  57     -26.635 -23.215   4.550  5.00  0.00           C  
ATOM   1810  C1'  DA A  57     -26.654 -21.704   4.810  2.00  0.00           C  
ATOM   1811  N1   DA A  57     -24.722 -17.836   7.730  3.00  0.00           N  
ATOM   1812  C2   DA A  57     -24.917 -17.935   6.410  0.00  0.00           C  
ATOM   1813  N3   DA A  57     -25.452 -18.945   5.700  5.00  0.00           N  
ATOM   1814  C4   DA A  57     -25.928 -19.906   6.520  1.00  0.00           C  
ATOM   1815  C5   DA A  57     -25.851 -19.920   7.900  2.00  0.00           C  
ATOM   1816  C6   DA A  57     -25.138 -18.820   8.460  0.00  0.00           C  
ATOM   1817  N6   DA A  57     -24.719 -18.695   9.690  3.00  0.00           N  
ATOM   1818  N7   DA A  57     -26.424 -21.031   8.460  7.00  0.00           N  
ATOM   1819  C8   DA A  57     -26.740 -21.785   7.440  8.00  0.00           C  
ATOM   1820  N9   DA A  57     -26.436 -21.149   6.210  3.00  0.00           N  
ATOM   1821  OP1  DA A  57     -31.935 -24.205   4.150  1.00  0.00           O  
ATOM   1822  OP2  DA A  57     -30.855 -24.881   6.270  5.00  0.00           O1-
ATOM   1823  H2   DA A  57     -24.481 -17.144   5.750  7.00  0.00           H  
ATOM   1824  H8   DA A  57     -27.138 -22.800   7.590  0.00  0.00           H  
ATOM   1825  H1'  DA A  57     -25.813 -21.267   4.210  2.00  0.00           H  
ATOM   1826  H2'  DA A  57     -27.330 -23.765   5.130  0.00  0.00           H  
ATOM   1827  H3'  DA A  57     -27.518 -24.156   2.720  2.00  0.00           H  
ATOM   1828  H4'  DA A  57     -28.411 -21.689   2.230  5.00  0.00           H  
ATOM   1829  H5'  DA A  57     -30.310 -21.915   3.380  9.00  0.00           H  
ATOM   1830  H61  DA A  57     -24.473 -17.800   9.950  6.00  0.00           H  
ATOM   1831  H62  DA A  57     -24.981 -19.362  10.410  2.00  0.00           H  
ATOM   1832 H2''  DA A  57     -25.623 -23.666   4.490  2.00  0.00           H  
ATOM   1833 H5''  DA A  57     -29.775 -23.453   2.840  0.00  0.00           H  
ATOM   1834  P   DCP A  58     -25.792 -23.283   0.720  0.00  0.00           P  
ATOM   1835  C5' DCP A  58     -27.023 -21.426  -0.710  2.00  0.00           C  
ATOM   1836  O5' DCP A  58     -25.838 -22.052  -0.260  6.00  0.00           O  
ATOM   1837  C4' DCP A  58     -26.748 -19.893  -1.080  2.00  0.00           C  
ATOM   1838  O4' DCP A  58     -26.400 -19.267   0.210  4.00  0.00           O  
ATOM   1839  C3' DCP A  58     -25.526 -19.756  -2.030  0.00  0.00           C  
ATOM   1840  O3' DCP A  58     -25.726 -18.553  -2.820  0.00  0.00           O  
ATOM   1841  C2' DCP A  58     -24.392 -19.566  -1.040  1.00  0.00           C  
ATOM   1842  C1' DCP A  58     -25.041 -18.758   0.100  0.00  0.00           C  
ATOM   1843  N1  DCP A  58     -24.185 -18.865   1.330  7.00  0.00           N  
ATOM   1844  C2  DCP A  58     -23.555 -17.741   1.920  5.00  0.00           C  
ATOM   1845  O2  DCP A  58     -23.738 -16.556   1.470  8.00  0.00           O  
ATOM   1846  N3  DCP A  58     -22.757 -17.878   3.000  7.00  0.00           N  
ATOM   1847  C4  DCP A  58     -22.684 -19.046   3.610  0.00  0.00           C  
ATOM   1848  N4  DCP A  58     -22.045 -19.177   4.740  9.00  0.00           N  
ATOM   1849  C5  DCP A  58     -23.113 -20.250   2.960  3.00  0.00           C  
ATOM   1850  C6  DCP A  58     -23.945 -20.122   1.880  8.00  0.00           C  
ATOM   1851  OP1 DCP A  58     -26.840 -24.260   0.340  1.00  0.00           O  
ATOM   1852  OP2 DCP A  58     -24.335 -23.805   0.870  6.00  0.00           O  
ATOM   1853  H3  DCP A  58     -22.539 -17.066   3.440  9.00  0.00           H  
ATOM   1854  H5  DCP A  58     -22.841 -21.195   3.350  4.00  0.00           H  
ATOM   1855  H6  DCP A  58     -24.343 -20.970   1.440  5.00  0.00           H  
ATOM   1856  H1' DCP A  58     -25.013 -17.774  -0.330  2.00  0.00           H  
ATOM   1857  H2' DCP A  58     -24.152 -20.562  -0.750  6.00  0.00           H  
ATOM   1858  H3' DCP A  58     -25.418 -20.598  -2.680  2.00  0.00           H  
ATOM   1859  H4' DCP A  58     -27.662 -19.513  -1.530  4.00  0.00           H  
ATOM   1860  H41 DCP A  58     -21.480 -18.500   5.240  4.00  0.00           H  
ATOM   1861  H5' DCP A  58     -27.804 -21.443   0.020  5.00  0.00           H  
ATOM   1862  H42 DCP A  58     -22.045 -20.082   5.150  0.00  0.00           H  
ATOM   1863 H2'' DCP A  58     -23.444 -19.098  -1.450  0.00  0.00           H  
ATOM   1864 H5'' DCP A  58     -27.308 -22.083  -1.530  4.00  0.00           H  
ATOM   1865  P   DCP A  59     -26.362 -18.689  -4.270  6.00  0.00           P  
ATOM   1866  C5' DCP A  59     -23.829 -19.100  -4.990  2.00  0.00           C  
ATOM   1867  O5' DCP A  59     -25.165 -19.491  -4.970  1.00  0.00           O  
ATOM   1868  C4' DCP A  59     -22.966 -20.200  -5.770  1.00  0.00           C  
ATOM   1869  O4' DCP A  59     -22.857 -21.366  -4.980  2.00  0.00           O  
ATOM   1870  C3' DCP A  59     -23.548 -20.509  -7.130  0.00  0.00           C  
ATOM   1871  O3' DCP A  59     -22.518 -20.534  -8.110  9.00  0.00           O  
ATOM   1872  C2' DCP A  59     -24.144 -21.922  -6.910  7.00  0.00           C  
ATOM   1873  C1' DCP A  59     -23.225 -22.426  -5.830  0.00  0.00           C  
ATOM   1874  N1  DCP A  59     -23.778 -23.507  -4.950  6.00  0.00           N  
ATOM   1875  C2  DCP A  59     -23.092 -24.711  -4.870  5.00  0.00           C  
ATOM   1876  O2  DCP A  59     -22.042 -24.936  -5.530  2.00  0.00           O  
ATOM   1877  N3  DCP A  59     -23.514 -25.698  -4.070  3.00  0.00           N  
ATOM   1878  C4  DCP A  59     -24.682 -25.560  -3.440  9.00  0.00           C  
ATOM   1879  N4  DCP A  59     -25.124 -26.614  -2.750  9.00  0.00           N  
ATOM   1880  C5  DCP A  59     -25.411 -24.347  -3.510  7.00  0.00           C  
ATOM   1881  C6  DCP A  59     -24.990 -23.325  -4.320  1.00  0.00           C  
ATOM   1882  OP1 DCP A  59     -26.445 -17.318  -4.820  4.00  0.00           O  
ATOM   1883  OP2 DCP A  59     -27.628 -19.493  -4.170  6.00  0.00           O  
ATOM   1884  H3  DCP A  59     -22.934 -26.513  -4.070  4.00  0.00           H  
ATOM   1885  H5  DCP A  59     -26.220 -24.127  -2.790  7.00  0.00           H  
ATOM   1886  H6  DCP A  59     -25.524 -22.388  -4.270  2.00  0.00           H  
ATOM   1887  H1' DCP A  59     -22.350 -22.749  -6.350  3.00  0.00           H  
ATOM   1888  H2' DCP A  59     -25.113 -21.748  -6.380  3.00  0.00           H  
ATOM   1889  H3' DCP A  59     -24.346 -19.800  -7.360  2.00  0.00           H  
ATOM   1890  H4' DCP A  59     -21.949 -19.760  -5.890  9.00  0.00           H  
ATOM   1891  H41 DCP A  59     -24.590 -27.472  -2.720  7.00  0.00           H  
ATOM   1892  H5' DCP A  59     -23.491 -19.013  -3.950  6.00  0.00           H  
ATOM   1893  H42 DCP A  59     -25.902 -26.499  -2.130  5.00  0.00           H  
ATOM   1894 H2'' DCP A  59     -24.246 -22.577  -7.830  2.00  0.00           H  
ATOM   1895 H5'' DCP A  59     -23.641 -18.062  -5.440  5.00  0.00           H  
ATOM   1896  P   DCP A  60     -22.654 -20.044  -9.550  0.00  0.00           P  
ATOM   1897  C5' DCP A  60     -24.296 -21.276 -11.330  0.00  0.00           C  
ATOM   1898  O5' DCP A  60     -23.260 -21.301 -10.300  4.00  0.00           O  
ATOM   1899  C4' DCP A  60     -24.440 -22.705 -11.860  5.00  0.00           C  
ATOM   1900  O4' DCP A  60     -24.830 -23.592 -10.840  2.00  0.00           O  
ATOM   1901  C3' DCP A  60     -25.532 -22.709 -12.910  7.00  0.00           C  
ATOM   1902  O3' DCP A  60     -24.986 -22.976 -14.200  3.00  0.00           O  
ATOM   1903  C2' DCP A  60     -26.490 -23.847 -12.510  2.00  0.00           C  
ATOM   1904  C1' DCP A  60     -25.640 -24.573 -11.500  0.00  0.00           C  
ATOM   1905  N1  DCP A  60     -26.412 -25.483 -10.550  1.00  0.00           N  
ATOM   1906  C2  DCP A  60     -25.785 -26.723 -10.240  7.00  0.00           C  
ATOM   1907  O2  DCP A  60     -24.635 -27.127 -10.680  8.00  0.00           O  
ATOM   1908  N3  DCP A  60     -26.521 -27.602  -9.510  4.00  0.00           N  
ATOM   1909  C4  DCP A  60     -27.590 -27.204  -8.860  8.00  0.00           C  
ATOM   1910  N4  DCP A  60     -28.137 -28.036  -8.020  9.00  0.00           N  
ATOM   1911  C5  DCP A  60     -28.197 -25.886  -9.070  0.00  0.00           C  
ATOM   1912  C6  DCP A  60     -27.533 -25.072  -9.900  6.00  0.00           C  
ATOM   1913  OP1 DCP A  60     -21.320 -19.774 -10.060  7.00  0.00           O  
ATOM   1914  OP2 DCP A  60     -23.669 -18.958  -9.630  4.00  0.00           O  
ATOM   1915  H3  DCP A  60     -26.117 -28.574  -9.370  7.00  0.00           H  
ATOM   1916  H5  DCP A  60     -29.185 -25.565  -8.500  8.00  0.00           H  
ATOM   1917  H6  DCP A  60     -27.892 -24.000  -9.960  2.00  0.00           H  
ATOM   1918  H1' DCP A  60     -24.958 -25.166 -12.050  5.00  0.00           H  
ATOM   1919  H2' DCP A  60     -27.489 -23.460 -12.190  4.00  0.00           H  
ATOM   1920  H3' DCP A  60     -26.123 -21.797 -12.900  2.00  0.00           H  
ATOM   1921  H4' DCP A  60     -23.481 -23.002 -12.360  8.00  0.00           H  
ATOM   1922  H41 DCP A  60     -27.590 -28.893  -7.800  1.00  0.00           H  
ATOM   1923  H5' DCP A  60     -24.077 -20.525 -11.990  4.00  0.00           H  
ATOM   1924  H42 DCP A  60     -28.890 -27.730  -7.390  1.00  0.00           H  
ATOM   1925 H2'' DCP A  60     -26.658 -24.379 -13.420  1.00  0.00           H  
ATOM   1926 H5'' DCP A  60     -25.196 -20.988 -10.860  5.00  0.00           H  
ATOM   1927  P    DT A  61     -25.498 -22.225 -15.590  7.00  0.00           P  
ATOM   1928  C5'  DT A  61     -28.171 -22.076 -15.550  5.00  0.00           C  
ATOM   1929  O5'  DT A  61     -26.977 -22.807 -15.880  9.00  0.00           O  
ATOM   1930  C4'  DT A  61     -29.426 -22.919 -15.820  0.00  0.00           C  
ATOM   1931  O4'  DT A  61     -29.344 -23.417 -17.140  3.00  0.00           O  
ATOM   1932  C3'  DT A  61     -29.668 -24.146 -14.950  5.00  0.00           C  
ATOM   1933  O3'  DT A  61     -31.102 -24.332 -14.940  9.00  0.00           O  
ATOM   1934  C2'  DT A  61     -28.931 -25.241 -15.640  9.00  0.00           C  
ATOM   1935  C1'  DT A  61     -29.380 -24.869 -17.080  0.00  0.00           C  
ATOM   1936  N1   DT A  61     -28.543 -25.433 -18.110  3.00  0.00           N  
ATOM   1937  C2   DT A  61     -29.204 -25.939 -19.220  0.00  0.00           C  
ATOM   1938  O2   DT A  61     -30.438 -25.908 -19.390  9.00  0.00           O  
ATOM   1939  N3   DT A  61     -28.465 -26.435 -20.210  4.00  0.00           N  
ATOM   1940  C4   DT A  61     -27.046 -26.307 -20.350  1.00  0.00           C  
ATOM   1941  O4   DT A  61     -26.476 -26.663 -21.380  0.00  0.00           O  
ATOM   1942  C5   DT A  61     -26.391 -25.717 -19.150  8.00  0.00           C  
ATOM   1943  C6   DT A  61     -27.159 -25.392 -18.090  8.00  0.00           C  
ATOM   1944  C7   DT A  61     -24.854 -25.544 -18.990  9.00  0.00           C  
ATOM   1945  OP1  DT A  61     -24.659 -22.726 -16.670  0.00  0.00           O  
ATOM   1946  OP2  DT A  61     -25.450 -20.790 -15.380  0.00  0.00           O1-
ATOM   1947  H3   DT A  61     -28.887 -26.788 -21.110  2.00  0.00           H  
ATOM   1948  H6   DT A  61     -26.735 -25.039 -17.150  9.00  0.00           H  
ATOM   1949  H1'  DT A  61     -30.451 -25.121 -17.240  6.00  0.00           H  
ATOM   1950  H2'  DT A  61     -27.957 -25.216 -15.390  4.00  0.00           H  
ATOM   1951  H3'  DT A  61     -29.369 -24.029 -13.930  6.00  0.00           H  
ATOM   1952  H4'  DT A  61     -30.196 -22.179 -15.770  9.00  0.00           H  
ATOM   1953  H5'  DT A  61     -28.175 -21.120 -16.120  2.00  0.00           H  
ATOM   1954  H71  DT A  61     -24.363 -26.515 -19.090  4.00  0.00           H  
ATOM   1955  H72  DT A  61     -24.642 -25.135 -17.990  2.00  0.00           H  
ATOM   1956  H73  DT A  61     -24.546 -24.917 -19.770  8.00  0.00           H  
ATOM   1957 H2''  DT A  61     -29.282 -26.192 -15.410  9.00  0.00           H  
ATOM   1958 H5''  DT A  61     -28.049 -21.837 -14.520  3.00  0.00           H  
ATOM   1959  P    DA A  62     -31.743 -25.329 -13.880  0.00  0.00           P  
ATOM   1960  C5'  DA A  62     -32.370 -26.929 -15.840  8.00  0.00           C  
ATOM   1961  O5'  DA A  62     -31.650 -26.767 -14.610  4.00  0.00           O  
ATOM   1962  C4'  DA A  62     -32.024 -28.125 -16.720  7.00  0.00           C  
ATOM   1963  O4'  DA A  62     -30.658 -28.100 -17.100  2.00  0.00           O  
ATOM   1964  C3'  DA A  62     -32.148 -29.436 -15.880  0.00  0.00           C  
ATOM   1965  O3'  DA A  62     -33.023 -30.388 -16.430  6.00  0.00           O  
ATOM   1966  C2'  DA A  62     -30.724 -29.902 -15.760  0.00  0.00           C  
ATOM   1967  C1'  DA A  62     -30.183 -29.376 -17.010  8.00  0.00           C  
ATOM   1968  N1   DA A  62     -25.994 -29.468 -19.920  9.00  0.00           N  
ATOM   1969  C2   DA A  62     -27.246 -29.825 -20.130  9.00  0.00           C  
ATOM   1970  N3   DA A  62     -28.301 -29.710 -19.380  6.00  0.00           N  
ATOM   1971  C4   DA A  62     -27.924 -29.258 -18.150  4.00  0.00           C  
ATOM   1972  C5   DA A  62     -26.652 -29.051 -17.710  5.00  0.00           C  
ATOM   1973  C6   DA A  62     -25.664 -29.145 -18.720  9.00  0.00           C  
ATOM   1974  N6   DA A  62     -24.356 -28.934 -18.630  6.00  0.00           N  
ATOM   1975  N7   DA A  62     -26.638 -28.767 -16.360  9.00  0.00           N  
ATOM   1976  C8   DA A  62     -27.862 -28.806 -16.030  5.00  0.00           C  
ATOM   1977  N9   DA A  62     -28.733 -29.146 -17.060  7.00  0.00           N  
ATOM   1978  OP1  DA A  62     -33.138 -24.931 -13.790  9.00  0.00           O  
ATOM   1979  OP2  DA A  62     -30.887 -25.600 -12.710  9.00  0.00           O1-
ATOM   1980  H2   DA A  62     -27.476 -30.127 -21.190  0.00  0.00           H  
ATOM   1981  H8   DA A  62     -28.305 -28.452 -15.060  9.00  0.00           H  
ATOM   1982  H1'  DA A  62     -30.483 -30.059 -17.860  9.00  0.00           H  
ATOM   1983  H2'  DA A  62     -30.300 -29.472 -14.840  6.00  0.00           H  
ATOM   1984  H3'  DA A  62     -32.381 -29.280 -14.840  0.00  0.00           H  
ATOM   1985  H4'  DA A  62     -32.638 -28.132 -17.560  7.00  0.00           H  
ATOM   1986  H5'  DA A  62     -32.196 -26.078 -16.460  6.00  0.00           H  
ATOM   1987  H61  DA A  62     -23.845 -29.059 -19.450  7.00  0.00           H  
ATOM   1988  H62  DA A  62     -23.941 -28.547 -17.810  6.00  0.00           H  
ATOM   1989 H2''  DA A  62     -30.688 -31.013 -15.700  9.00  0.00           H  
ATOM   1990 H5''  DA A  62     -33.363 -26.994 -15.490  6.00  0.00           H  
ATOM   1991  P    DA A  63     -34.465 -30.759 -16.020  8.00  0.00           P  
ATOM   1992  C5'  DA A  63     -35.494 -31.924 -13.920  8.00  0.00           C  
ATOM   1993  O5'  DA A  63     -34.330 -31.379 -14.560  2.00  0.00           O  
ATOM   1994  C4'  DA A  63     -35.148 -32.584 -12.550  8.00  0.00           C  
ATOM   1995  O4'  DA A  63     -34.169 -33.627 -12.650  1.00  0.00           O  
ATOM   1996  C3'  DA A  63     -34.846 -31.577 -11.510  0.00  0.00           C  
ATOM   1997  O3'  DA A  63     -35.500 -31.886 -10.270  2.00  0.00           O  
ATOM   1998  C2'  DA A  63     -33.344 -31.850 -11.380  4.00  0.00           C  
ATOM   1999  C1'  DA A  63     -33.189 -33.305 -11.720  8.00  0.00           C  
ATOM   2000  N1   DA A  63     -28.426 -34.614 -10.820  2.00  0.00           N  
ATOM   2001  C2   DA A  63     -29.523 -34.709 -10.130  2.00  0.00           C  
ATOM   2002  N3   DA A  63     -30.773 -34.432 -10.500  2.00  0.00           N  
ATOM   2003  C4   DA A  63     -30.754 -33.956 -11.760  6.00  0.00           C  
ATOM   2004  C5   DA A  63     -29.726 -33.793 -12.640  5.00  0.00           C  
ATOM   2005  C6   DA A  63     -28.484 -34.158 -12.030  5.00  0.00           C  
ATOM   2006  N6   DA A  63     -27.334 -34.084 -12.650  5.00  0.00           N  
ATOM   2007  N7   DA A  63     -30.116 -33.200 -13.830  8.00  0.00           N  
ATOM   2008  C8   DA A  63     -31.416 -33.114 -13.650  1.00  0.00           C  
ATOM   2009  N9   DA A  63     -31.896 -33.544 -12.420  2.00  0.00           N  
ATOM   2010  OP1  DA A  63     -34.936 -31.844 -16.990  2.00  0.00           O  
ATOM   2011  OP2  DA A  63     -35.287 -29.491 -15.880  3.00  0.00           O1-
ATOM   2012  H2   DA A  63     -29.502 -35.145  -9.160  4.00  0.00           H  
ATOM   2013  H8   DA A  63     -32.100 -32.597 -14.360  9.00  0.00           H  
ATOM   2014  H1'  DA A  63     -33.209 -33.891 -10.860  1.00  0.00           H  
ATOM   2015  H2'  DA A  63     -32.841 -31.238 -12.120  5.00  0.00           H  
ATOM   2016  H3'  DA A  63     -35.031 -30.589 -11.850  8.00  0.00           H  
ATOM   2017  H4'  DA A  63     -36.097 -33.081 -12.210  0.00  0.00           H  
ATOM   2018  H5'  DA A  63     -35.869 -32.608 -14.690  0.00  0.00           H  
ATOM   2019  H61  DA A  63     -26.557 -34.310 -12.060  6.00  0.00           H  
ATOM   2020  H62  DA A  63     -27.284 -33.567 -13.540  3.00  0.00           H  
ATOM   2021 H2''  DA A  63     -32.987 -31.535 -10.370  8.00  0.00           H  
ATOM   2022 H5''  DA A  63     -36.237 -31.065 -13.740  8.00  0.00           H  
ATOM   2023  P   DCP A  64     -35.653 -30.871  -8.990  9.00  0.00           P  
ATOM   2024  C5' DCP A  64     -33.818 -32.064  -7.570  3.00  0.00           C  
ATOM   2025  O5' DCP A  64     -34.278 -30.893  -8.260  7.00  0.00           O  
ATOM   2026  C4' DCP A  64     -32.290 -32.093  -7.200  9.00  0.00           C  
ATOM   2027  O4' DCP A  64     -31.635 -32.067  -8.450  7.00  0.00           O  
ATOM   2028  C3' DCP A  64     -31.820 -30.885  -6.370  0.00  0.00           C  
ATOM   2029  O3' DCP A  64     -31.917 -31.144  -4.990  5.00  0.00           O  
ATOM   2030  C2' DCP A  64     -30.405 -30.642  -6.920  7.00  0.00           C  
ATOM   2031  C1' DCP A  64     -30.438 -31.327  -8.340  9.00  0.00           C  
ATOM   2032  N1  DCP A  64     -30.319 -30.365  -9.500  1.00  0.00           N  
ATOM   2033  C2  DCP A  64     -29.132 -30.554 -10.250  6.00  0.00           C  
ATOM   2034  O2  DCP A  64     -28.382 -31.531 -10.200  4.00  0.00           O  
ATOM   2035  N3  DCP A  64     -28.823 -29.561 -11.030  1.00  0.00           N  
ATOM   2036  C4  DCP A  64     -29.585 -28.534 -11.210  2.00  0.00           C  
ATOM   2037  N4  DCP A  64     -29.220 -27.694 -12.160  0.00  0.00           N  
ATOM   2038  C5  DCP A  64     -30.728 -28.284 -10.420  7.00  0.00           C  
ATOM   2039  C6  DCP A  64     -31.080 -29.207  -9.550  9.00  0.00           C  
ATOM   2040  OP1 DCP A  64     -36.598 -31.450  -8.050  3.00  0.00           O  
ATOM   2041  OP2 DCP A  64     -35.975 -29.528  -9.540  7.00  0.00           O  
ATOM   2042  H3  DCP A  64     -27.972 -29.681 -11.640  9.00  0.00           H  
ATOM   2043  H5  DCP A  64     -31.414 -27.465 -10.630  7.00  0.00           H  
ATOM   2044  H6  DCP A  64     -31.943 -29.295  -9.020  3.00  0.00           H  
ATOM   2045  H1' DCP A  64     -29.668 -32.042  -8.410  0.00  0.00           H  
ATOM   2046  H2' DCP A  64     -30.088 -29.604  -7.030  2.00  0.00           H  
ATOM   2047  H3' DCP A  64     -32.460 -30.035  -6.630  6.00  0.00           H  
ATOM   2048  H4' DCP A  64     -32.016 -33.065  -6.720  3.00  0.00           H  
ATOM   2049  H41 DCP A  64     -28.318 -27.812 -12.670  8.00  0.00           H  
ATOM   2050  H5' DCP A  64     -34.080 -32.954  -8.210  0.00  0.00           H  
ATOM   2051  H42 DCP A  64     -29.958 -27.001 -12.430  6.00  0.00           H  
ATOM   2052 H2'' DCP A  64     -29.677 -31.197  -6.180  8.00  0.00           H  
ATOM   2053 H5'' DCP A  64     -34.432 -32.178  -6.640  7.00  0.00           H  
ATOM   2054  P   DCP A  65     -31.545 -30.162  -3.760  7.00  0.00           P  
ATOM   2055  C5' DCP A  65     -29.757 -32.128  -3.260  3.00  0.00           C  
ATOM   2056  O5' DCP A  65     -30.076 -30.777  -3.600  3.00  0.00           O  
ATOM   2057  C4' DCP A  65     -28.299 -32.418  -3.200  8.00  0.00           C  
ATOM   2058  O4' DCP A  65     -27.580 -32.005  -4.350  8.00  0.00           O  
ATOM   2059  C3' DCP A  65     -27.731 -31.599  -2.000  5.00  0.00           C  
ATOM   2060  O3' DCP A  65     -27.849 -32.401  -0.850  3.00  0.00           O  
ATOM   2061  C2' DCP A  65     -26.282 -31.430  -2.390  5.00  0.00           C  
ATOM   2062  C1' DCP A  65     -26.342 -31.397  -4.030  8.00  0.00           C  
ATOM   2063  N1  DCP A  65     -26.308 -30.076  -4.570  0.00  0.00           N  
ATOM   2064  C2  DCP A  65     -25.222 -29.656  -5.350  3.00  0.00           C  
ATOM   2065  O2  DCP A  65     -24.291 -30.353  -5.680  8.00  0.00           O  
ATOM   2066  N3  DCP A  65     -25.277 -28.382  -5.810  2.00  0.00           N  
ATOM   2067  C4  DCP A  65     -26.302 -27.557  -5.560  4.00  0.00           C  
ATOM   2068  N4  DCP A  65     -26.171 -26.365  -6.070  5.00  0.00           N  
ATOM   2069  C5  DCP A  65     -27.405 -27.933  -4.750  6.00  0.00           C  
ATOM   2070  C6  DCP A  65     -27.382 -29.208  -4.320  7.00  0.00           C  
ATOM   2071  OP1 DCP A  65     -32.360 -30.565  -2.590  1.00  0.00           O  
ATOM   2072  OP2 DCP A  65     -31.410 -28.736  -4.260  0.00  0.00           O  
ATOM   2073  H3  DCP A  65     -24.590 -28.117  -6.490  2.00  0.00           H  
ATOM   2074  H5  DCP A  65     -28.259 -27.327  -4.680  7.00  0.00           H  
ATOM   2075  H6  DCP A  65     -28.158 -29.545  -3.740  5.00  0.00           H  
ATOM   2076  H1' DCP A  65     -25.562 -32.037  -4.420  5.00  0.00           H  
ATOM   2077  H2' DCP A  65     -25.908 -30.546  -1.920  6.00  0.00           H  
ATOM   2078  H3' DCP A  65     -28.298 -30.607  -2.000  2.00  0.00           H  
ATOM   2079  H4' DCP A  65     -28.072 -33.463  -3.030  9.00  0.00           H  
ATOM   2080  H41 DCP A  65     -25.401 -26.172  -6.690  5.00  0.00           H  
ATOM   2081  H5' DCP A  65     -30.274 -32.740  -4.080  3.00  0.00           H  
ATOM   2082  H42 DCP A  65     -26.990 -25.673  -6.040  7.00  0.00           H  
ATOM   2083 H2'' DCP A  65     -25.706 -32.343  -2.060  4.00  0.00           H  
ATOM   2084 H5'' DCP A  65     -30.237 -32.453  -2.320  8.00  0.00           H  
ATOM   2085  P   DCP A  66     -27.773 -31.778   0.620  4.00  0.00           P  
ATOM   2086  C5' DCP A  66     -25.341 -32.965   1.040  5.00  0.00           C  
ATOM   2087  O5' DCP A  66     -26.156 -31.793   0.980  9.00  0.00           O  
ATOM   2088  C4' DCP A  66     -23.914 -32.690   1.420  8.00  0.00           C  
ATOM   2089  O4' DCP A  66     -23.462 -31.674   0.530  5.00  0.00           O  
ATOM   2090  C3' DCP A  66     -23.883 -32.001   2.760  7.00  0.00           C  
ATOM   2091  O3' DCP A  66     -23.652 -32.928   3.840  2.00  0.00           O  
ATOM   2092  C2' DCP A  66     -22.605 -31.204   2.500  6.00  0.00           C  
ATOM   2093  C1' DCP A  66     -22.396 -30.885   1.090  4.00  0.00           C  
ATOM   2094  N1  DCP A  66     -22.526 -29.479   0.680  5.00  0.00           N  
ATOM   2095  C2  DCP A  66     -21.542 -28.825  -0.020  6.00  0.00           C  
ATOM   2096  O2  DCP A  66     -20.532 -29.418  -0.430  2.00  0.00           O  
ATOM   2097  N3  DCP A  66     -21.652 -27.533  -0.350  7.00  0.00           N  
ATOM   2098  C4  DCP A  66     -22.732 -26.816  -0.100  7.00  0.00           C  
ATOM   2099  N4  DCP A  66     -22.810 -25.612  -0.610  9.00  0.00           N  
ATOM   2100  C5  DCP A  66     -23.830 -27.526   0.480  9.00  0.00           C  
ATOM   2101  C6  DCP A  66     -23.745 -28.838   0.890  4.00  0.00           C  
ATOM   2102  OP1 DCP A  66     -28.436 -32.738   1.530  8.00  0.00           O  
ATOM   2103  OP2 DCP A  66     -28.209 -30.329   0.670  1.00  0.00           O  
ATOM   2104  H3  DCP A  66     -20.923 -27.198  -0.940  3.00  0.00           H  
ATOM   2105  H5  DCP A  66     -24.760 -26.969   0.630  0.00  0.00           H  
ATOM   2106  H6  DCP A  66     -24.623 -29.355   1.260  9.00  0.00           H  
ATOM   2107  H1' DCP A  66     -21.420 -31.277   0.780  9.00  0.00           H  
ATOM   2108  H2' DCP A  66     -22.614 -30.226   3.040  9.00  0.00           H  
ATOM   2109  H3' DCP A  66     -24.658 -31.282   2.930  9.00  0.00           H  
ATOM   2110  H4' DCP A  66     -23.306 -33.529   1.480  9.00  0.00           H  
ATOM   2111  H41 DCP A  66     -22.006 -25.212  -1.150  5.00  0.00           H  
ATOM   2112  H5' DCP A  66     -25.295 -33.414   0.090  5.00  0.00           H  
ATOM   2113  H42 DCP A  66     -23.458 -24.934  -0.100  9.00  0.00           H  
ATOM   2114 H2'' DCP A  66     -21.753 -31.598   2.950  8.00  0.00           H  
ATOM   2115 H5'' DCP A  66     -25.744 -33.680   1.760  9.00  0.00           H  
ATOM   2116  P    DT A  67     -24.315 -32.783   5.270  5.00  0.00           P  
ATOM   2117  C5'  DT A  67     -22.751 -30.786   5.950  6.00  0.00           C  
ATOM   2118  O5'  DT A  67     -23.239 -32.121   6.190  6.00  0.00           O  
ATOM   2119  C4'  DT A  67     -21.221 -30.886   5.880  7.00  0.00           C  
ATOM   2120  O4'  DT A  67     -20.792 -29.615   5.360  5.00  0.00           O  
ATOM   2121  C3'  DT A  67     -20.445 -31.111   7.130  6.00  0.00           C  
ATOM   2122  O3'  DT A  67     -19.226 -31.670   6.780  2.00  0.00           O  
ATOM   2123  C2'  DT A  67     -20.220 -29.781   7.670  0.00  0.00           C  
ATOM   2124  C1'  DT A  67     -19.845 -29.053   6.320  8.00  0.00           C  
ATOM   2125  N1   DT A  67     -20.007 -27.586   6.400  1.00  0.00           N  
ATOM   2126  C2   DT A  67     -19.038 -26.899   5.770  7.00  0.00           C  
ATOM   2127  O2   DT A  67     -17.980 -27.328   5.300  1.00  0.00           O  
ATOM   2128  N3   DT A  67     -19.341 -25.627   5.520  0.00  0.00           N  
ATOM   2129  C4   DT A  67     -20.574 -24.943   5.640  1.00  0.00           C  
ATOM   2130  O4   DT A  67     -20.736 -23.772   5.190  9.00  0.00           O  
ATOM   2131  C5   DT A  67     -21.564 -25.768   6.410  6.00  0.00           C  
ATOM   2132  C6   DT A  67     -21.247 -27.053   6.790  9.00  0.00           C  
ATOM   2133  C7   DT A  67     -22.977 -25.291   6.650  9.00  0.00           C  
ATOM   2134  OP1  DT A  67     -24.529 -34.179   5.770  5.00  0.00           O  
ATOM   2135  OP2  DT A  67     -25.481 -31.906   5.120  9.00  0.00           O1-
ATOM   2136  H3   DT A  67     -18.683 -25.155   5.000  9.00  0.00           H  
ATOM   2137  H6   DT A  67     -21.970 -27.612   7.260  2.00  0.00           H  
ATOM   2138  H1'  DT A  67     -18.797 -29.298   6.050  5.00  0.00           H  
ATOM   2139  H2'  DT A  67     -21.150 -29.442   8.070  5.00  0.00           H  
ATOM   2140  H3'  DT A  67     -20.979 -31.804   7.770  8.00  0.00           H  
ATOM   2141  H4'  DT A  67     -20.904 -31.680   5.210  9.00  0.00           H  
ATOM   2142  H5'  DT A  67     -23.119 -30.257   6.860  6.00  0.00           H  
ATOM   2143  H71  DT A  67     -23.584 -25.987   7.290  0.00  0.00           H  
ATOM   2144  H72  DT A  67     -23.426 -25.023   5.690  4.00  0.00           H  
ATOM   2145  H73  DT A  67     -22.836 -24.357   7.170  2.00  0.00           H  
ATOM   2146 H2''  DT A  67     -19.452 -29.746   8.420  7.00  0.00           H  
ATOM   2147 H5''  DT A  67     -23.126 -30.314   5.020  6.00  0.00           H  
ATOM   2148  P    DA A  68     -18.231 -32.220   7.970  0.00  0.00           P  
ATOM   2149  C5'  DA A  68     -16.608 -30.247   7.510  9.00  0.00           C  
ATOM   2150  O5'  DA A  68     -17.413 -30.876   8.420  5.00  0.00           O  
ATOM   2151  C4'  DA A  68     -16.094 -28.893   7.930  5.00  0.00           C  
ATOM   2152  O4'  DA A  68     -17.258 -28.061   8.260  0.00  0.00           O  
ATOM   2153  C3'  DA A  68     -15.296 -29.031   9.260  4.00  0.00           C  
ATOM   2154  O3'  DA A  68     -14.160 -28.257   9.300  7.00  0.00           O  
ATOM   2155  C2'  DA A  68     -16.335 -28.603  10.250  6.00  0.00           C  
ATOM   2156  C1'  DA A  68     -17.045 -27.432   9.570  3.00  0.00           C  
ATOM   2157  N1   DA A  68     -20.542 -23.596   9.820  4.00  0.00           N  
ATOM   2158  C2   DA A  68     -19.287 -23.606   9.420  5.00  0.00           C  
ATOM   2159  N3   DA A  68     -18.445 -24.627   9.270  1.00  0.00           N  
ATOM   2160  C4   DA A  68     -18.907 -25.736   9.970  8.00  0.00           C  
ATOM   2161  C5   DA A  68     -20.250 -25.953  10.350  4.00  0.00           C  
ATOM   2162  C6   DA A  68     -21.022 -24.787  10.180  7.00  0.00           C  
ATOM   2163  N6   DA A  68     -22.356 -24.753  10.300  9.00  0.00           N  
ATOM   2164  N7   DA A  68     -20.468 -27.209  10.870  1.00  0.00           N  
ATOM   2165  C8   DA A  68     -19.265 -27.744  10.850  2.00  0.00           C  
ATOM   2166  N9   DA A  68     -18.297 -26.996  10.210  2.00  0.00           N  
ATOM   2167  OP1  DA A  68     -17.281 -33.221   7.430  5.00  0.00           O  
ATOM   2168  OP2  DA A  68     -19.187 -32.741   8.980  9.00  0.00           O1-
ATOM   2169  H2   DA A  68     -18.949 -22.699   9.030  3.00  0.00           H  
ATOM   2170  H8   DA A  68     -19.016 -28.765  11.180  5.00  0.00           H  
ATOM   2171  H1'  DA A  68     -16.346 -26.575   9.380  0.00  0.00           H  
ATOM   2172  H2'  DA A  68     -17.014 -29.475  10.490  1.00  0.00           H  
ATOM   2173  H3'  DA A  68     -15.007 -30.028   9.440  7.00  0.00           H  
ATOM   2174  H4'  DA A  68     -15.467 -28.443   7.150  4.00  0.00           H  
ATOM   2175  H5'  DA A  68     -17.081 -30.082   6.470  0.00  0.00           H  
ATOM   2176  H61  DA A  68     -22.766 -23.983   9.890  7.00  0.00           H  
ATOM   2177  H62  DA A  68     -22.875 -25.576  10.610  7.00  0.00           H  
ATOM   2178 H2''  DA A  68     -15.766 -28.376  11.140  9.00  0.00           H  
ATOM   2179 H5''  DA A  68     -15.740 -30.816   7.280  3.00  0.00           H  
ATOM   2180  P    DA A  69     -12.731 -28.985   8.850  8.00  0.00           P  
ATOM   2181  C5'  DA A  69     -12.695 -28.567   6.250  2.00  0.00           C  
ATOM   2182  O5'  DA A  69     -12.872 -29.476   7.320  2.00  0.00           O  
ATOM   2183  C4'  DA A  69     -12.181 -29.308   5.030  8.00  0.00           C  
ATOM   2184  O4'  DA A  69     -10.884 -29.585   5.370  2.00  0.00           O  
ATOM   2185  C3'  DA A  69     -12.893 -30.536   4.540  3.00  0.00           C  
ATOM   2186  O3'  DA A  69     -12.898 -30.757   3.170  1.00  0.00           O  
ATOM   2187  C2'  DA A  69     -12.119 -31.586   5.300  5.00  0.00           C  
ATOM   2188  C1'  DA A  69     -10.727 -31.022   5.160  4.00  0.00           C  
ATOM   2189  N1   DA A  69      -6.372 -33.711   5.810  8.00  0.00           N  
ATOM   2190  C2   DA A  69      -7.193 -33.624   4.840  7.00  0.00           C  
ATOM   2191  N3   DA A  69      -8.404 -33.044   4.780  2.00  0.00           N  
ATOM   2192  C4   DA A  69      -8.696 -32.335   5.860  3.00  0.00           C  
ATOM   2193  C5   DA A  69      -7.966 -32.292   7.000  7.00  0.00           C  
ATOM   2194  C6   DA A  69      -6.754 -33.048   6.930  7.00  0.00           C  
ATOM   2195  N6   DA A  69      -5.866 -33.110   7.930  5.00  0.00           N  
ATOM   2196  N7   DA A  69      -8.546 -31.393   7.930  3.00  0.00           N  
ATOM   2197  C8   DA A  69      -9.738 -31.208   7.420  0.00  0.00           C  
ATOM   2198  N9   DA A  69      -9.776 -31.478   6.140  7.00  0.00           N  
ATOM   2199  OP1  DA A  69     -12.481 -30.156   9.750  4.00  0.00           O  
ATOM   2200  OP2  DA A  69     -11.712 -27.912   8.900  6.00  0.00           O1-
ATOM   2201  H2   DA A  69      -6.964 -34.131   3.910  6.00  0.00           H  
ATOM   2202  H8   DA A  69     -10.432 -30.507   7.900  9.00  0.00           H  
ATOM   2203  H1'  DA A  69     -10.338 -31.228   4.170  9.00  0.00           H  
ATOM   2204  H2'  DA A  69     -12.394 -31.795   6.380  4.00  0.00           H  
ATOM   2205  H3'  DA A  69     -13.902 -30.459   4.930  3.00  0.00           H  
ATOM   2206  H4'  DA A  69     -12.268 -28.504   4.290  7.00  0.00           H  
ATOM   2207  H5'  DA A  69     -12.029 -27.718   6.450  1.00  0.00           H  
ATOM   2208  H61  DA A  69      -5.036 -33.695   7.940  4.00  0.00           H  
ATOM   2209  H62  DA A  69      -5.940 -32.415   8.640  2.00  0.00           H  
ATOM   2210 H2''  DA A  69     -12.096 -32.554   4.730  9.00  0.00           H  
ATOM   2211 H5''  DA A  69     -13.663 -28.054   6.120  9.00  0.00           H  
ATOM   2212  P    DC A  70     -14.028 -31.617   2.430  6.00  0.00           P  
ATOM   2213  C5'  DC A  70     -16.171 -31.765   4.060  7.00  0.00           C  
ATOM   2214  O5'  DC A  70     -15.372 -31.092   3.050  5.00  0.00           O  
ATOM   2215  C4'  DC A  70     -17.705 -31.639   3.920  2.00  0.00           C  
ATOM   2216  O4'  DC A  70     -17.996 -30.273   3.870  0.00  0.00           O  
ATOM   2217  C3'  DC A  70     -18.229 -32.272   2.590  8.00  0.00           C  
ATOM   2218  O3'  DC A  70     -19.459 -32.864   2.790  1.00  0.00           O  
ATOM   2219  C2'  DC A  70     -18.481 -31.071   1.650  3.00  0.00           C  
ATOM   2220  C1'  DC A  70     -18.774 -30.024   2.690  0.00  0.00           C  
ATOM   2221  N1   DC A  70     -18.758 -28.550   2.280  6.00  0.00           N  
ATOM   2222  C2   DC A  70     -19.813 -27.706   2.580  6.00  0.00           C  
ATOM   2223  O2   DC A  70     -20.961 -28.137   2.850  9.00  0.00           O  
ATOM   2224  N3   DC A  70     -19.764 -26.360   2.350  5.00  0.00           N  
ATOM   2225  C4   DC A  70     -18.654 -25.869   1.860  8.00  0.00           C  
ATOM   2226  N4   DC A  70     -18.704 -24.626   1.520  2.00  0.00           N  
ATOM   2227  C5   DC A  70     -17.599 -26.665   1.440  5.00  0.00           C  
ATOM   2228  C6   DC A  70     -17.637 -28.001   1.720  3.00  0.00           C  
ATOM   2229  OP1  DC A  70     -13.901 -33.067   2.840  3.00  0.00           O  
ATOM   2230  OP2  DC A  70     -14.060 -31.322   0.980  1.00  0.00           O1-
ATOM   2231  H5   DC A  70     -16.769 -26.243   1.060  1.00  0.00           H  
ATOM   2232  H6   DC A  70     -16.913 -28.661   1.260  7.00  0.00           H  
ATOM   2233  H1'  DC A  70     -19.832 -30.211   2.980  6.00  0.00           H  
ATOM   2234  H2'  DC A  70     -17.587 -30.761   1.070  2.00  0.00           H  
ATOM   2235  H3'  DC A  70     -17.521 -33.020   2.170  0.00  0.00           H  
ATOM   2236  H4'  DC A  70     -18.095 -32.061   4.840  7.00  0.00           H  
ATOM   2237  H41  DC A  70     -19.563 -24.174   1.690  4.00  0.00           H  
ATOM   2238  H5'  DC A  70     -16.027 -31.409   5.090  0.00  0.00           H  
ATOM   2239  H42  DC A  70     -17.924 -24.349   0.920  7.00  0.00           H  
ATOM   2240 H2''  DC A  70     -19.362 -31.223   1.030  5.00  0.00           H  
ATOM   2241 H5''  DC A  70     -15.983 -32.848   4.020  3.00  0.00           H  
ATOM   2242  P    DC A  71     -19.996 -34.070   1.810  6.00  0.00           P  
ATOM   2243  C5'  DC A  71     -20.662 -33.932  -0.690  8.00  0.00           C  
ATOM   2244  O5'  DC A  71     -20.506 -33.312   0.490  9.00  0.00           O  
ATOM   2245  C4'  DC A  71     -21.715 -33.194  -1.570  1.00  0.00           C  
ATOM   2246  O4'  DC A  71     -21.426 -31.773  -1.870  3.00  0.00           O  
ATOM   2247  C3'  DC A  71     -21.825 -33.713  -3.040  1.00  0.00           C  
ATOM   2248  O3'  DC A  71     -22.483 -34.932  -2.970  0.00  0.00           O  
ATOM   2249  C2'  DC A  71     -22.452 -32.572  -3.890  9.00  0.00           C  
ATOM   2250  C1'  DC A  71     -22.224 -31.346  -2.950  8.00  0.00           C  
ATOM   2251  N1   DC A  71     -21.614 -30.173  -3.610  6.00  0.00           N  
ATOM   2252  C2   DC A  71     -22.281 -28.930  -3.600  8.00  0.00           C  
ATOM   2253  O2   DC A  71     -23.427 -28.743  -3.200  1.00  0.00           O  
ATOM   2254  N3   DC A  71     -21.729 -27.870  -4.190  0.00  0.00           N  
ATOM   2255  C4   DC A  71     -20.549 -28.023  -4.770  8.00  0.00           C  
ATOM   2256  N4   DC A  71     -20.033 -26.959  -5.350  7.00  0.00           N  
ATOM   2257  C5   DC A  71     -19.879 -29.279  -4.790  5.00  0.00           C  
ATOM   2258  C6   DC A  71     -20.454 -30.319  -4.210  2.00  0.00           C  
ATOM   2259  OP1  DC A  71     -21.178 -34.617   2.560  0.00  0.00           O  
ATOM   2260  OP2  DC A  71     -18.863 -34.926   1.480  5.00  0.00           O1-
ATOM   2261  H5   DC A  71     -18.975 -29.346  -5.260  0.00  0.00           H  
ATOM   2262  H6   DC A  71     -19.953 -31.278  -4.310  2.00  0.00           H  
ATOM   2263  H1'  DC A  71     -23.161 -31.019  -2.620  2.00  0.00           H  
ATOM   2264  H2'  DC A  71     -22.008 -32.368  -4.890  0.00  0.00           H  
ATOM   2265  H3'  DC A  71     -20.767 -33.843  -3.340  7.00  0.00           H  
ATOM   2266  H4'  DC A  71     -22.688 -33.271  -1.120  1.00  0.00           H  
ATOM   2267  H41  DC A  71     -20.537 -26.144  -5.220  2.00  0.00           H  
ATOM   2268  H5'  DC A  71     -21.024 -34.879  -0.450  8.00  0.00           H  
ATOM   2269  H42  DC A  71     -19.190 -26.953  -5.880  0.00  0.00           H  
ATOM   2270 H2''  DC A  71     -23.510 -32.776  -3.990  0.00  0.00           H  
ATOM   2271 H5''  DC A  71     -19.702 -34.007  -1.200  5.00  0.00           H  
ATOM   2272  P    DC A  72     -22.555 -36.013  -4.190  0.00  0.00           P  
ATOM   2273  C5'  DC A  72     -24.935 -35.127  -4.610  1.00  0.00           C  
ATOM   2274  O5'  DC A  72     -23.697 -35.453  -5.160  6.00  0.00           O  
ATOM   2275  C4'  DC A  72     -26.033 -34.656  -5.660  5.00  0.00           C  
ATOM   2276  O4'  DC A  72     -25.548 -33.500  -6.310  4.00  0.00           O  
ATOM   2277  C3'  DC A  72     -26.288 -35.693  -6.800  0.00  0.00           C  
ATOM   2278  O3'  DC A  72     -27.501 -36.396  -6.590  5.00  0.00           O  
ATOM   2279  C2'  DC A  72     -26.406 -34.792  -8.030  2.00  0.00           C  
ATOM   2280  C1'  DC A  72     -26.274 -33.284  -7.480  5.00  0.00           C  
ATOM   2281  N1   DC A  72     -25.558 -32.360  -8.330  2.00  0.00           N  
ATOM   2282  C2   DC A  72     -25.966 -31.027  -8.390  4.00  0.00           C  
ATOM   2283  O2   DC A  72     -26.965 -30.542  -7.820  4.00  0.00           O  
ATOM   2284  N3   DC A  72     -25.258 -30.042  -9.110  9.00  0.00           N  
ATOM   2285  C4   DC A  72     -24.143 -30.427  -9.700  9.00  0.00           C  
ATOM   2286  N4   DC A  72     -23.440 -29.535 -10.380  8.00  0.00           N  
ATOM   2287  C5   DC A  72     -23.657 -31.772  -9.570  9.00  0.00           C  
ATOM   2288  C6   DC A  72     -24.336 -32.689  -8.850  2.00  0.00           C  
ATOM   2289  OP1  DC A  72     -22.957 -37.321  -3.610  9.00  0.00           O  
ATOM   2290  OP2  DC A  72     -21.229 -35.875  -4.880  8.00  0.00           O1-
ATOM   2291  H5   DC A  72     -22.639 -31.987 -10.020  3.00  0.00           H  
ATOM   2292  H6   DC A  72     -23.891 -33.659  -8.580  3.00  0.00           H  
ATOM   2293  H1'  DC A  72     -27.278 -32.892  -7.210  0.00  0.00           H  
ATOM   2294  H2'  DC A  72     -25.593 -35.167  -8.630  7.00  0.00           H  
ATOM   2295  H3'  DC A  72     -25.427 -36.394  -6.900  4.00  0.00           H  
ATOM   2296  H4'  DC A  72     -26.990 -34.423  -5.240  9.00  0.00           H  
ATOM   2297  H41  DC A  72     -23.686 -28.586 -10.480  7.00  0.00           H  
ATOM   2298  H5'  DC A  72     -24.770 -34.376  -3.820  3.00  0.00           H  
ATOM   2299  H42  DC A  72     -22.625 -29.934 -10.720  5.00  0.00           H  
ATOM   2300 H2''  DC A  72     -27.369 -34.911  -8.530  5.00  0.00           H  
ATOM   2301 H5''  DC A  72     -25.310 -36.047  -4.140  0.00  0.00           H  
ATOM   2302  P    DT A  73     -27.678 -37.847  -5.900  0.00  0.00           P  
ATOM   2303  C5'  DT A  73     -28.288 -38.794  -8.170  7.00  0.00           C  
ATOM   2304  O5'  DT A  73     -27.385 -38.896  -7.090  7.00  0.00           O  
ATOM   2305  C4'  DT A  73     -27.828 -39.460  -9.390  2.00  0.00           C  
ATOM   2306  O4'  DT A  73     -28.797 -39.332 -10.420  2.00  0.00           O  
ATOM   2307  C3'  DT A  73     -26.571 -38.732  -9.840  1.00  0.00           C  
ATOM   2308  O3'  DT A  73     -25.789 -39.625 -10.700  0.00  0.00           O  
ATOM   2309  C2'  DT A  73     -27.257 -37.746 -10.860  2.00  0.00           C  
ATOM   2310  C1'  DT A  73     -28.223 -38.717 -11.450  7.00  0.00           C  
ATOM   2311  N1   DT A  73     -29.249 -37.940 -12.170  2.00  0.00           N  
ATOM   2312  C2   DT A  73     -29.023 -37.766 -13.570  8.00  0.00           C  
ATOM   2313  O2   DT A  73     -27.913 -38.027 -14.030  5.00  0.00           O  
ATOM   2314  N3   DT A  73     -30.060 -37.273 -14.290  7.00  0.00           N  
ATOM   2315  C4   DT A  73     -31.395 -37.230 -13.890  9.00  0.00           C  
ATOM   2316  O4   DT A  73     -32.206 -36.888 -14.720  0.00  0.00           O  
ATOM   2317  C5   DT A  73     -31.530 -37.321 -12.480  2.00  0.00           C  
ATOM   2318  C6   DT A  73     -30.536 -37.734 -11.640  5.00  0.00           C  
ATOM   2319  C7   DT A  73     -32.934 -37.136 -12.010  1.00  0.00           C  
ATOM   2320  OP1  DT A  73     -29.130 -37.844  -5.570  3.00  0.00           O  
ATOM   2321  OP2  DT A  73     -26.654 -38.120  -4.900  7.00  0.00           O1-
ATOM   2322  H3   DT A  73     -29.857 -37.112 -15.290  2.00  0.00           H  
ATOM   2323  H6   DT A  73     -30.703 -37.820 -10.560  2.00  0.00           H  
ATOM   2324  H1'  DT A  73     -27.727 -39.460 -12.120  8.00  0.00           H  
ATOM   2325  H2'  DT A  73     -27.707 -36.890 -10.320  6.00  0.00           H  
ATOM   2326  H3'  DT A  73     -25.958 -38.288  -9.040  0.00  0.00           H  
ATOM   2327  H4'  DT A  73     -27.551 -40.421  -9.130  8.00  0.00           H  
ATOM   2328  H5'  DT A  73     -28.425 -37.746  -8.400  6.00  0.00           H  
ATOM   2329  H71  DT A  73     -33.208 -36.072 -11.940  1.00  0.00           H  
ATOM   2330  H72  DT A  73     -33.609 -37.581 -12.760  5.00  0.00           H  
ATOM   2331  H73  DT A  73     -33.028 -37.646 -11.030  8.00  0.00           H  
ATOM   2332 H2''  DT A  73     -26.663 -37.371 -11.620  7.00  0.00           H  
ATOM   2333 H5''  DT A  73     -29.190 -39.212  -7.870  2.00  0.00           H  
ATOM   2334  P    DA A  74     -24.249 -39.613 -10.840  9.00  0.00           P  
ATOM   2335  C5'  DA A  74     -24.222 -38.552 -13.210  5.00  0.00           C  
ATOM   2336  O5'  DA A  74     -24.060 -38.371 -11.830  1.00  0.00           O  
ATOM   2337  C4'  DA A  74     -23.162 -37.780 -13.880  6.00  0.00           C  
ATOM   2338  O4'  DA A  74     -23.419 -37.807 -15.300  6.00  0.00           O  
ATOM   2339  C3'  DA A  74     -23.160 -36.349 -13.410  3.00  0.00           C  
ATOM   2340  O3'  DA A  74     -21.825 -35.768 -13.500  7.00  0.00           O  
ATOM   2341  C2'  DA A  74     -24.190 -35.773 -14.400  6.00  0.00           C  
ATOM   2342  C1'  DA A  74     -23.840 -36.511 -15.720  2.00  0.00           C  
ATOM   2343  N1   DA A  74     -25.257 -35.970 -20.590  1.00  0.00           N  
ATOM   2344  C2   DA A  74     -24.069 -36.129 -20.000  3.00  0.00           C  
ATOM   2345  N3   DA A  74     -23.835 -36.518 -18.710  6.00  0.00           N  
ATOM   2346  C4   DA A  74     -24.946 -36.440 -17.970  6.00  0.00           C  
ATOM   2347  C5   DA A  74     -26.196 -36.250 -18.450  9.00  0.00           C  
ATOM   2348  C6   DA A  74     -26.316 -36.133 -19.820  4.00  0.00           C  
ATOM   2349  N6   DA A  74     -27.419 -35.926 -20.470  4.00  0.00           N  
ATOM   2350  N7   DA A  74     -27.109 -36.233 -17.430  6.00  0.00           N  
ATOM   2351  C8   DA A  74     -26.388 -36.554 -16.400  1.00  0.00           C  
ATOM   2352  N9   DA A  74     -25.074 -36.513 -16.640  8.00  0.00           N  
ATOM   2353  OP1  DA A  74     -23.903 -40.922 -11.410  3.00  0.00           O  
ATOM   2354  OP2  DA A  74     -23.653 -39.186  -9.530  7.00  0.00           O1-
ATOM   2355  H2   DA A  74     -23.219 -35.991 -20.710  2.00  0.00           H  
ATOM   2356  H8   DA A  74     -26.784 -36.563 -15.380  9.00  0.00           H  
ATOM   2357  H1'  DA A  74     -23.024 -36.019 -16.180  8.00  0.00           H  
ATOM   2358  H2'  DA A  74     -25.196 -36.083 -14.070  2.00  0.00           H  
ATOM   2359  H3'  DA A  74     -23.623 -36.180 -12.420  2.00  0.00           H  
ATOM   2360  H4'  DA A  74     -22.239 -38.343 -13.600  9.00  0.00           H  
ATOM   2361  H5'  DA A  74     -25.216 -38.280 -13.560  4.00  0.00           H  
ATOM   2362  H61  DA A  74     -27.488 -35.960 -21.450  1.00  0.00           H  
ATOM   2363  H62  DA A  74     -28.304 -35.803 -20.030  0.00  0.00           H  
ATOM   2364 H2''  DA A  74     -24.163 -34.696 -14.530  2.00  0.00           H  
ATOM   2365 H5''  DA A  74     -24.320 -39.577 -13.510  5.00  0.00           H  
ATOM   2366  P    DA A  75     -21.241 -34.309 -13.160  6.00  0.00           P  
ATOM   2367  C5'  DA A  75     -21.003 -33.844 -15.720  7.00  0.00           C  
ATOM   2368  O5'  DA A  75     -21.589 -33.576 -14.480  1.00  0.00           O  
ATOM   2369  C4'  DA A  75     -21.810 -33.239 -16.890  5.00  0.00           C  
ATOM   2370  O4'  DA A  75     -23.191 -33.525 -17.050  5.00  0.00           O  
ATOM   2371  C3'  DA A  75     -21.740 -31.673 -16.760  8.00  0.00           C  
ATOM   2372  O3'  DA A  75     -21.537 -31.051 -17.980  7.00  0.00           O  
ATOM   2373  C2'  DA A  75     -23.105 -31.327 -16.230  5.00  0.00           C  
ATOM   2374  C1'  DA A  75     -23.963 -32.275 -17.000  7.00  0.00           C  
ATOM   2375  N1   DA A  75     -28.737 -33.186 -18.800  9.00  0.00           N  
ATOM   2376  C2   DA A  75     -27.579 -33.100 -19.410  9.00  0.00           C  
ATOM   2377  N3   DA A  75     -26.355 -32.952 -18.880  6.00  0.00           N  
ATOM   2378  C4   DA A  75     -26.402 -32.758 -17.520  5.00  0.00           C  
ATOM   2379  C5   DA A  75     -27.523 -32.864 -16.730  6.00  0.00           C  
ATOM   2380  C6   DA A  75     -28.736 -33.094 -17.470  7.00  0.00           C  
ATOM   2381  N6   DA A  75     -29.892 -33.050 -16.880  9.00  0.00           N  
ATOM   2382  N7   DA A  75     -27.229 -32.623 -15.360  8.00  0.00           N  
ATOM   2383  C8   DA A  75     -25.994 -32.364 -15.370  9.00  0.00           C  
ATOM   2384  N9   DA A  75     -25.381 -32.522 -16.610  0.00  0.00           N  
ATOM   2385  OP1  DA A  75     -19.813 -34.415 -13.120  0.00  0.00           O  
ATOM   2386  OP2  DA A  75     -21.941 -33.777 -11.970  0.00  0.00           O1-
ATOM   2387  H2   DA A  75     -27.618 -33.207 -20.520  6.00  0.00           H  
ATOM   2388  H8   DA A  75     -25.392 -32.211 -14.470  8.00  0.00           H  
ATOM   2389  H1'  DA A  75     -24.037 -31.885 -17.970  3.00  0.00           H  
ATOM   2390  H2'  DA A  75     -23.034 -31.527 -15.180  8.00  0.00           H  
ATOM   2391  H3'  DA A  75     -20.992 -31.323 -15.950  9.00  0.00           H  
ATOM   2392  H4'  DA A  75     -21.287 -33.516 -17.810  1.00  0.00           H  
ATOM   2393  H5'  DA A  75     -20.786 -34.916 -15.880  4.00  0.00           H  
ATOM   2394  H61  DA A  75     -30.702 -33.207 -17.440  8.00  0.00           H  
ATOM   2395  H62  DA A  75     -29.894 -33.125 -15.900  0.00  0.00           H  
ATOM   2396 H2''  DA A  75     -23.504 -30.233 -16.240  8.00  0.00           H  
ATOM   2397 H5''  DA A  75     -20.019 -33.353 -15.680  7.00  0.00           H  
ATOM   2398  P    DC A  76     -20.656 -29.670 -18.060  6.00  0.00           P  
ATOM   2399  C5'  DC A  76     -21.785 -27.388 -17.330  3.00  0.00           C  
ATOM   2400  O5'  DC A  76     -21.388 -28.727 -16.970  4.00  0.00           O  
ATOM   2401  C4'  DC A  76     -22.664 -26.799 -16.240  3.00  0.00           C  
ATOM   2402  O4'  DC A  76     -23.793 -27.483 -15.940  3.00  0.00           O  
ATOM   2403  C3'  DC A  76     -21.871 -26.691 -14.930  8.00  0.00           C  
ATOM   2404  O3'  DC A  76     -20.963 -25.518 -15.060  2.00  0.00           O  
ATOM   2405  C2'  DC A  76     -22.970 -26.350 -13.990  9.00  0.00           C  
ATOM   2406  C1'  DC A  76     -24.199 -27.009 -14.630  1.00  0.00           C  
ATOM   2407  N1   DC A  76     -24.652 -28.221 -13.890  9.00  0.00           N  
ATOM   2408  C2   DC A  76     -25.878 -28.145 -13.230  3.00  0.00           C  
ATOM   2409  O2   DC A  76     -26.529 -27.120 -13.220  8.00  0.00           O  
ATOM   2410  N3   DC A  76     -26.409 -29.260 -12.600  3.00  0.00           N  
ATOM   2411  C4   DC A  76     -25.644 -30.382 -12.590  4.00  0.00           C  
ATOM   2412  N4   DC A  76     -26.151 -31.480 -12.060  4.00  0.00           N  
ATOM   2413  C5   DC A  76     -24.300 -30.456 -13.050  5.00  0.00           C  
ATOM   2414  C6   DC A  76     -23.869 -29.342 -13.720  8.00  0.00           C  
ATOM   2415  OP1  DC A  76     -20.846 -28.997 -19.370  3.00  0.00           O  
ATOM   2416  OP2  DC A  76     -19.266 -29.912 -17.620  5.00  0.00           O1-
ATOM   2417  H5   DC A  76     -23.605 -31.268 -12.970  7.00  0.00           H  
ATOM   2418  H6   DC A  76     -22.878 -29.388 -14.210  5.00  0.00           H  
ATOM   2419  H1'  DC A  76     -25.028 -26.270 -14.600  1.00  0.00           H  
ATOM   2420  H2'  DC A  76     -22.813 -26.787 -13.010  1.00  0.00           H  
ATOM   2421  H3'  DC A  76     -21.261 -27.580 -14.690  4.00  0.00           H  
ATOM   2422  H4'  DC A  76     -23.039 -25.843 -16.520  5.00  0.00           H  
ATOM   2423  H41  DC A  76     -27.043 -31.537 -11.640  4.00  0.00           H  
ATOM   2424  H5'  DC A  76     -22.291 -27.384 -18.280  2.00  0.00           H  
ATOM   2425  H42  DC A  76     -25.595 -32.316 -11.980  5.00  0.00           H  
ATOM   2426 H2''  DC A  76     -23.115 -25.245 -13.900  9.00  0.00           H  
ATOM   2427 H5''  DC A  76     -20.921 -26.780 -17.440  8.00  0.00           H  
ATOM   2428  P    DC A  77     -19.597 -25.396 -14.240  3.00  0.00           P  
ATOM   2429  C5'  DC A  77     -20.615 -23.664 -12.510  1.00  0.00           C  
ATOM   2430  O5'  DC A  77     -20.161 -25.028 -12.780  3.00  0.00           O  
ATOM   2431  C4'  DC A  77     -20.997 -23.337 -11.120  0.00  0.00           C  
ATOM   2432  O4'  DC A  77     -22.034 -24.270 -10.730  9.00  0.00           O  
ATOM   2433  C3'  DC A  77     -19.866 -23.507 -10.020  9.00  0.00           C  
ATOM   2434  O3'  DC A  77     -19.027 -22.381  -9.780  5.00  0.00           O  
ATOM   2435  C2'  DC A  77     -20.780 -23.676  -8.880  6.00  0.00           C  
ATOM   2436  C1'  DC A  77     -22.020 -24.356  -9.370  5.00  0.00           C  
ATOM   2437  N1   DC A  77     -22.163 -25.803  -8.990  1.00  0.00           N  
ATOM   2438  C2   DC A  77     -23.158 -26.252  -8.140  6.00  0.00           C  
ATOM   2439  O2   DC A  77     -24.148 -25.544  -7.900  2.00  0.00           O  
ATOM   2440  N3   DC A  77     -23.065 -27.448  -7.570  4.00  0.00           N  
ATOM   2441  C4   DC A  77     -22.051 -28.202  -7.930  8.00  0.00           C  
ATOM   2442  N4   DC A  77     -22.034 -29.420  -7.420  6.00  0.00           N  
ATOM   2443  C5   DC A  77     -21.099 -27.879  -8.870  4.00  0.00           C  
ATOM   2444  C6   DC A  77     -21.174 -26.613  -9.420  4.00  0.00           C  
ATOM   2445  OP1  DC A  77     -18.943 -24.179 -14.800  9.00  0.00           O  
ATOM   2446  OP2  DC A  77     -18.895 -26.693 -14.260  1.00  0.00           O1-
ATOM   2447  H5   DC A  77     -20.317 -28.636  -9.120  9.00  0.00           H  
ATOM   2448  H6   DC A  77     -20.395 -26.279 -10.060  2.00  0.00           H  
ATOM   2449  H1'  DC A  77     -23.004 -23.856  -8.990  4.00  0.00           H  
ATOM   2450  H2'  DC A  77     -20.335 -24.328  -8.130  8.00  0.00           H  
ATOM   2451  H3'  DC A  77     -19.318 -24.457 -10.250  0.00  0.00           H  
ATOM   2452  H4'  DC A  77     -21.295 -22.341 -11.260  3.00  0.00           H  
ATOM   2453  H41  DC A  77     -22.767 -29.743  -6.760  9.00  0.00           H  
ATOM   2454  H5'  DC A  77     -21.484 -23.545 -13.160  5.00  0.00           H  
ATOM   2455  H42  DC A  77     -21.199 -29.920  -7.660  6.00  0.00           H  
ATOM   2456 H2''  DC A  77     -21.036 -22.733  -8.360  3.00  0.00           H  
ATOM   2457 H5''  DC A  77     -19.830 -23.015 -12.720  1.00  0.00           H  
ATOM   2458  P    DC A  78     -17.480 -22.451  -9.850  4.00  0.00           P  
ATOM   2459  C5'  DC A  78     -17.353 -23.246  -7.340  9.00  0.00           C  
ATOM   2460  O5'  DC A  78     -17.053 -22.342  -8.310  0.00  0.00           O  
ATOM   2461  C4'  DC A  78     -18.593 -22.774  -6.500  7.00  0.00           C  
ATOM   2462  O4'  DC A  78     -18.949 -23.866  -5.700  9.00  0.00           O  
ATOM   2463  C3'  DC A  78     -17.974 -21.685  -5.630  7.00  0.00           C  
ATOM   2464  O3'  DC A  78     -18.965 -20.696  -5.480  7.00  0.00           O  
ATOM   2465  C2'  DC A  78     -17.895 -22.418  -4.350  5.00  0.00           C  
ATOM   2466  C1'  DC A  78     -18.966 -23.519  -4.360  9.00  0.00           C  
ATOM   2467  N1   DC A  78     -18.738 -24.679  -3.460  1.00  0.00           N  
ATOM   2468  C2   DC A  78     -19.670 -25.214  -2.540  0.00  0.00           C  
ATOM   2469  O2   DC A  78     -20.733 -24.747  -2.200  8.00  0.00           O  
ATOM   2470  N3   DC A  78     -19.423 -26.396  -1.920  8.00  0.00           N  
ATOM   2471  C4   DC A  78     -18.270 -26.989  -1.980  0.00  0.00           C  
ATOM   2472  N4   DC A  78     -18.138 -28.196  -1.380  7.00  0.00           N  
ATOM   2473  C5   DC A  78     -17.285 -26.491  -2.900  7.00  0.00           C  
ATOM   2474  C6   DC A  78     -17.565 -25.352  -3.610  4.00  0.00           C  
ATOM   2475  OP1  DC A  78     -16.951 -21.285 -10.540  1.00  0.00           O  
ATOM   2476  OP2  DC A  78     -17.019 -23.721 -10.360  8.00  0.00           O1-
ATOM   2477  H5   DC A  78     -16.281 -26.940  -3.070  2.00  0.00           H  
ATOM   2478  H6   DC A  78     -16.817 -25.027  -4.350  7.00  0.00           H  
ATOM   2479  H1'  DC A  78     -19.907 -23.010  -4.130  1.00  0.00           H  
ATOM   2480  H2'  DC A  78     -16.991 -22.938  -4.420  4.00  0.00           H  
ATOM   2481  H3'  DC A  78     -17.063 -21.266  -6.040  7.00  0.00           H  
ATOM   2482  H4'  DC A  78     -19.274 -22.255  -7.220  0.00  0.00           H  
ATOM   2483  H41  DC A  78     -18.858 -28.569  -0.790  0.00  0.00           H  
ATOM   2484  H5'  DC A  78     -16.504 -23.342  -6.710  8.00  0.00           H  
ATOM   2485  H42  DC A  78     -17.238 -28.686  -1.380  0.00  0.00           H  
ATOM   2486 H2''  DC A  78     -17.808 -21.672  -3.560  8.00  0.00           H  
ATOM   2487 H5''  DC A  78     -17.599 -24.243  -7.740  7.00  0.00           H  
ATOM   2488  P    DT A  79     -18.824 -19.369  -6.370  6.00  0.00           P  
ATOM   2489  C5'  DT A  79     -17.470 -18.027  -4.670  9.00  0.00           C  
ATOM   2490  O5'  DT A  79     -17.570 -18.507  -5.940  0.00  0.00           O  
ATOM   2491  C4'  DT A  79     -16.400 -17.007  -4.370  0.00  0.00           C  
ATOM   2492  O4'  DT A  79     -15.170 -17.660  -4.340  8.00  0.00           O  
ATOM   2493  C3'  DT A  79     -16.423 -15.805  -5.360  2.00  0.00           C  
ATOM   2494  O3'  DT A  79     -15.964 -14.666  -4.680  7.00  0.00           O  
ATOM   2495  C2'  DT A  79     -15.427 -16.316  -6.360  8.00  0.00           C  
ATOM   2496  C1'  DT A  79     -14.465 -17.023  -5.440  7.00  0.00           C  
ATOM   2497  N1   DT A  79     -13.569 -18.036  -6.130  8.00  0.00           N  
ATOM   2498  C2   DT A  79     -12.199 -17.744  -6.120  0.00  0.00           C  
ATOM   2499  O2   DT A  79     -11.683 -16.606  -5.900  4.00  0.00           O  
ATOM   2500  N3   DT A  79     -11.371 -18.835  -6.390  8.00  0.00           N  
ATOM   2501  C4   DT A  79     -11.810 -20.109  -6.690  4.00  0.00           C  
ATOM   2502  O4   DT A  79     -10.973 -20.939  -6.930  5.00  0.00           O  
ATOM   2503  C5   DT A  79     -13.250 -20.325  -6.730  2.00  0.00           C  
ATOM   2504  C6   DT A  79     -14.062 -19.322  -6.380  6.00  0.00           C  
ATOM   2505  C7   DT A  79     -13.844 -21.664  -7.180  2.00  0.00           C  
ATOM   2506  OP1  DT A  79     -18.649 -19.828  -7.780  9.00  0.00           O  
ATOM   2507  OP2  DT A  79     -20.030 -18.528  -6.090  9.00  0.00           O1-
ATOM   2508  H3   DT A  79     -10.381 -18.672  -6.230  9.00  0.00           H  
ATOM   2509  H6   DT A  79     -15.077 -19.525  -6.360  6.00  0.00           H  
ATOM   2510  H1'  DT A  79     -13.835 -16.225  -5.050  0.00  0.00           H  
ATOM   2511  H2'  DT A  79     -15.811 -17.031  -7.080  7.00  0.00           H  
ATOM   2512  H3'  DT A  79     -17.337 -15.688  -5.840  8.00  0.00           H  
ATOM   2513  H4'  DT A  79     -16.515 -16.546  -3.390  6.00  0.00           H  
ATOM   2514  H5'  DT A  79     -17.323 -18.886  -4.010  1.00  0.00           H  
ATOM   2515  H71  DT A  79     -13.545 -22.381  -6.370  8.00  0.00           H  
ATOM   2516  H72  DT A  79     -14.902 -21.630  -7.300  7.00  0.00           H  
ATOM   2517  H73  DT A  79     -13.469 -21.817  -8.130  9.00  0.00           H  
ATOM   2518 H2''  DT A  79     -14.914 -15.578  -6.950  3.00  0.00           H  
ATOM   2519 H5''  DT A  79     -18.349 -17.439  -4.390  7.00  0.00           H  
ATOM   2520  P    DA A  80     -16.413 -13.195  -5.150  1.00  0.00           P  
ATOM   2521  C5'  DA A  80     -14.206 -11.874  -5.540  3.00  0.00           C  
ATOM   2522  O5'  DA A  80     -15.215 -12.717  -6.070  3.00  0.00           O  
ATOM   2523  C4'  DA A  80     -13.009 -11.598  -6.500  9.00  0.00           C  
ATOM   2524  O4'  DA A  80     -12.546 -12.880  -6.810  6.00  0.00           O  
ATOM   2525  C3'  DA A  80     -13.444 -10.926  -7.810  3.00  0.00           C  
ATOM   2526  O3'  DA A  80     -12.412 -10.057  -8.190  7.00  0.00           O  
ATOM   2527  C2'  DA A  80     -13.554 -12.063  -8.860  0.00  0.00           C  
ATOM   2528  C1'  DA A  80     -12.429 -12.889  -8.290  3.00  0.00           C  
ATOM   2529  N1   DA A  80      -9.557 -16.506 -10.550  2.00  0.00           N  
ATOM   2530  C2   DA A  80      -9.211 -15.311 -10.160  5.00  0.00           C  
ATOM   2531  N3   DA A  80      -9.965 -14.474  -9.460  8.00  0.00           N  
ATOM   2532  C4   DA A  80     -11.297 -14.893  -9.330  9.00  0.00           C  
ATOM   2533  C5   DA A  80     -11.737 -16.138  -9.690  8.00  0.00           C  
ATOM   2534  C6   DA A  80     -10.770 -16.947 -10.290  6.00  0.00           C  
ATOM   2535  N6   DA A  80     -10.970 -18.123 -10.820  9.00  0.00           N  
ATOM   2536  N7   DA A  80     -13.182 -16.217  -9.530  6.00  0.00           N  
ATOM   2537  C8   DA A  80     -13.503 -15.080  -9.060  0.00  0.00           C  
ATOM   2538  N9   DA A  80     -12.458 -14.264  -8.900  3.00  0.00           N  
ATOM   2539  OP1  DA A  80     -16.500 -12.281  -3.970  0.00  0.00           O  
ATOM   2540  OP2  DA A  80     -17.621 -13.284  -6.040  4.00  0.00           O1-
ATOM   2541  H2   DA A  80      -8.259 -15.059 -10.340  7.00  0.00           H  
ATOM   2542  H8   DA A  80     -14.524 -14.726  -8.850  2.00  0.00           H  
ATOM   2543  H1'  DA A  80     -11.521 -12.391  -8.620  6.00  0.00           H  
ATOM   2544  H2'  DA A  80     -14.552 -12.565  -8.700  4.00  0.00           H  
ATOM   2545  H3'  DA A  80     -14.433 -10.462  -7.760  1.00  0.00           H  
ATOM   2546  H4'  DA A  80     -12.161 -11.073  -6.000  1.00  0.00           H  
ATOM   2547  H5'  DA A  80     -13.701 -12.407  -4.750  9.00  0.00           H  
ATOM   2548  H61  DA A  80     -10.282 -18.461 -11.420  7.00  0.00           H  
ATOM   2549  H62  DA A  80     -11.861 -18.590 -10.820  9.00  0.00           H  
ATOM   2550 H2''  DA A  80     -13.475 -11.761  -9.820  9.00  0.00           H  
ATOM   2551 H5''  DA A  80     -14.659 -10.959  -5.170  6.00  0.00           H  
ATOM   2552  P    DA A  81     -12.642  -8.502  -8.600  4.00  0.00           P  
ATOM   2553  C5'  DA A  81     -10.164  -7.973  -8.550  1.00  0.00           C  
ATOM   2554  O5'  DA A  81     -11.292  -8.266  -9.370  3.00  0.00           O  
ATOM   2555  C4'  DA A  81      -8.822  -8.479  -9.100  8.00  0.00           C  
ATOM   2556  O4'  DA A  81      -8.917  -9.879  -9.340  3.00  0.00           O  
ATOM   2557  C3'  DA A  81      -8.307  -7.792 -10.360  6.00  0.00           C  
ATOM   2558  O3'  DA A  81      -6.932  -7.420 -10.390  4.00  0.00           O  
ATOM   2559  C2'  DA A  81      -8.613  -8.884 -11.430  5.00  0.00           C  
ATOM   2560  C1'  DA A  81      -8.595 -10.150 -10.710  6.00  0.00           C  
ATOM   2561  N1   DA A  81      -9.299 -14.285 -13.660  8.00  0.00           N  
ATOM   2562  C2   DA A  81      -8.234 -13.598 -13.190  9.00  0.00           C  
ATOM   2563  N3   DA A  81      -8.050 -12.524 -12.450  8.00  0.00           N  
ATOM   2564  C4   DA A  81      -9.310 -12.170 -12.040  0.00  0.00           C  
ATOM   2565  C5   DA A  81     -10.489 -12.760 -12.320  5.00  0.00           C  
ATOM   2566  C6   DA A  81     -10.456 -13.897 -13.210  1.00  0.00           C  
ATOM   2567  N6   DA A  81     -11.434 -14.730 -13.580  5.00  0.00           N  
ATOM   2568  N7   DA A  81     -11.540 -12.031 -11.840  1.00  0.00           N  
ATOM   2569  C8   DA A  81     -10.967 -11.021 -11.320  0.00  0.00           C  
ATOM   2570  N9   DA A  81      -9.612 -11.070 -11.260  9.00  0.00           N  
ATOM   2571  OP1  DA A  81     -12.717  -7.674  -7.330  3.00  0.00           O  
ATOM   2572  OP2  DA A  81     -13.733  -8.480  -9.550  2.00  0.00           O1-
ATOM   2573  H2   DA A  81      -7.259 -14.057 -13.560  9.00  0.00           H  
ATOM   2574  H8   DA A  81     -11.592 -10.215 -10.920  4.00  0.00           H  
ATOM   2575  H1'  DA A  81      -7.559 -10.554 -10.700  8.00  0.00           H  
ATOM   2576  H2'  DA A  81      -9.537  -8.681 -11.990  5.00  0.00           H  
ATOM   2577  H3'  DA A  81      -8.869  -6.931 -10.480  8.00  0.00           H  
ATOM   2578  H4'  DA A  81      -8.052  -8.311  -8.460  1.00  0.00           H  
ATOM   2579  H5'  DA A  81     -10.297  -8.647  -7.680  0.00  0.00           H  
ATOM   2580  H61  DA A  81     -11.173 -15.241 -14.380  5.00  0.00           H  
ATOM   2581  H62  DA A  81     -12.411 -14.519 -13.360  8.00  0.00           H  
ATOM   2582 H2''  DA A  81      -7.849  -8.859 -12.170  3.00  0.00           H  
ATOM   2583 H5''  DA A  81     -10.087  -6.921  -8.230  8.00  0.00           H  
ATOM   2584  P    DC A  82      -6.532  -6.071 -11.070  7.00  0.00           P  
ATOM   2585  C5'  DC A  82      -4.905  -6.944 -13.000  9.00  0.00           C  
ATOM   2586  O5'  DC A  82      -6.215  -6.494 -12.530  2.00  0.00           O  
ATOM   2587  C4'  DC A  82      -4.956  -7.666 -14.370  8.00  0.00           C  
ATOM   2588  O4'  DC A  82      -5.845  -8.738 -14.380  8.00  0.00           O  
ATOM   2589  C3'  DC A  82      -5.374  -6.727 -15.590  4.00  0.00           C  
ATOM   2590  O3'  DC A  82      -4.363  -6.874 -16.600  3.00  0.00           O  
ATOM   2591  C2'  DC A  82      -6.691  -7.258 -16.060  0.00  0.00           C  
ATOM   2592  C1'  DC A  82      -6.485  -8.668 -15.680  0.00  0.00           C  
ATOM   2593  N1   DC A  82      -7.684  -9.539 -15.450  0.00  0.00           N  
ATOM   2594  C2   DC A  82      -7.825 -10.761 -16.180  2.00  0.00           C  
ATOM   2595  O2   DC A  82      -6.973 -11.166 -16.920  9.00  0.00           O  
ATOM   2596  N3   DC A  82      -8.967 -11.488 -16.170  5.00  0.00           N  
ATOM   2597  C4   DC A  82      -9.913 -11.046 -15.390  6.00  0.00           C  
ATOM   2598  N4   DC A  82     -11.114 -11.561 -15.480  6.00  0.00           N  
ATOM   2599  C5   DC A  82      -9.833  -9.861 -14.690  7.00  0.00           C  
ATOM   2600  C6   DC A  82      -8.726  -9.097 -14.710  2.00  0.00           C  
ATOM   2601  OP1  DC A  82      -5.215  -5.645 -10.460  5.00  0.00           O  
ATOM   2602  OP2  DC A  82      -7.643  -5.099 -11.040  0.00  0.00           O1-
ATOM   2603  H5   DC A  82     -10.726  -9.462 -14.110  5.00  0.00           H  
ATOM   2604  H6   DC A  82      -8.546  -8.063 -14.280  0.00  0.00           H  
ATOM   2605  H1'  DC A  82      -5.847  -9.159 -16.460  3.00  0.00           H  
ATOM   2606  H2'  DC A  82      -7.518  -6.697 -15.520  6.00  0.00           H  
ATOM   2607  H3'  DC A  82      -5.456  -5.662 -15.270  9.00  0.00           H  
ATOM   2608  H4'  DC A  82      -3.908  -7.951 -14.540  2.00  0.00           H  
ATOM   2609  H41  DC A  82     -11.096 -12.327 -16.200  3.00  0.00           H  
ATOM   2610  H5'  DC A  82      -4.540  -7.693 -12.270  6.00  0.00           H  
ATOM   2611  H42  DC A  82     -11.954 -11.259 -15.070  0.00  0.00           H  
ATOM   2612 H2''  DC A  82      -6.900  -7.121 -17.130  8.00  0.00           H  
ATOM   2613 H5''  DC A  82      -4.196  -6.103 -13.020  1.00  0.00           H  
ATOM   2614  P    DC A  83      -4.263  -6.231 -18.080  2.00  0.00           P  
ATOM   2615  C5'  DC A  83      -3.698  -8.521 -19.160  8.00  0.00           C  
ATOM   2616  O5'  DC A  83      -4.602  -7.427 -18.990  4.00  0.00           O  
ATOM   2617  C4'  DC A  83      -4.179  -9.453 -20.270  5.00  0.00           C  
ATOM   2618  O4'  DC A  83      -5.402  -9.957 -19.860  6.00  0.00           O  
ATOM   2619  C3'  DC A  83      -4.278  -8.878 -21.680  0.00  0.00           C  
ATOM   2620  O3'  DC A  83      -3.893  -9.900 -22.670  7.00  0.00           O  
ATOM   2621  C2'  DC A  83      -5.743  -8.566 -21.670  0.00  0.00           C  
ATOM   2622  C1'  DC A  83      -6.283  -9.794 -20.930  8.00  0.00           C  
ATOM   2623  N1   DC A  83      -7.687  -9.636 -20.400  3.00  0.00           N  
ATOM   2624  C2   DC A  83      -8.718 -10.299 -21.060  3.00  0.00           C  
ATOM   2625  O2   DC A  83      -8.478 -11.045 -21.940  9.00  0.00           O  
ATOM   2626  N3   DC A  83      -9.981 -10.185 -20.630  8.00  0.00           N  
ATOM   2627  C4   DC A  83     -10.164  -9.518 -19.530  2.00  0.00           C  
ATOM   2628  N4   DC A  83     -11.428  -9.456 -19.290  4.00  0.00           N  
ATOM   2629  C5   DC A  83      -9.210  -8.747 -18.860  6.00  0.00           C  
ATOM   2630  C6   DC A  83      -7.901  -8.871 -19.270  4.00  0.00           C  
ATOM   2631  OP1  DC A  83      -2.865  -5.738 -18.290  6.00  0.00           O  
ATOM   2632  OP2  DC A  83      -5.371  -5.263 -18.180  3.00  0.00           O1-
ATOM   2633  H5   DC A  83      -9.400  -8.045 -18.010  0.00  0.00           H  
ATOM   2634  H6   DC A  83      -6.997  -8.430 -18.900  6.00  0.00           H  
ATOM   2635  H1'  DC A  83      -6.305 -10.606 -21.690  4.00  0.00           H  
ATOM   2636  H2'  DC A  83      -5.987  -7.673 -21.180  7.00  0.00           H  
ATOM   2637  H3'  DC A  83      -3.751  -7.950 -21.790  9.00  0.00           H  
ATOM   2638  H4'  DC A  83      -3.501 -10.296 -20.170  5.00  0.00           H  
ATOM   2639  H41  DC A  83     -11.963 -10.094 -19.850  8.00  0.00           H  
ATOM   2640  H5'  DC A  83      -3.652  -8.988 -18.180  9.00  0.00           H  
ATOM   2641  H42  DC A  83     -11.672  -9.066 -18.400  1.00  0.00           H  
ATOM   2642 H2''  DC A  83      -6.143  -8.564 -22.680  1.00  0.00           H  
ATOM   2643 H5''  DC A  83      -2.668  -8.243 -19.450  5.00  0.00           H  
ATOM   2644  P    DC A  84      -3.796  -9.542 -24.260  6.00  0.00           P  
ATOM   2645  C5'  DC A  84      -5.572 -11.399 -25.000  1.00  0.00           C  
ATOM   2646  O5'  DC A  84      -5.215  -9.960 -24.840  1.00  0.00           O  
ATOM   2647  C4'  DC A  84      -6.735 -11.627 -25.930  7.00  0.00           C  
ATOM   2648  O4'  DC A  84      -8.065 -11.543 -25.340  6.00  0.00           O  
ATOM   2649  C3'  DC A  84      -6.661 -10.768 -27.100  7.00  0.00           C  
ATOM   2650  O3'  DC A  84      -6.855 -11.458 -28.310  2.00  0.00           O  
ATOM   2651  C2'  DC A  84      -7.741  -9.759 -26.730  2.00  0.00           C  
ATOM   2652  C1'  DC A  84      -8.778 -10.445 -25.940  3.00  0.00           C  
ATOM   2653  N1   DC A  84      -9.644  -9.721 -24.970  7.00  0.00           N  
ATOM   2654  C2   DC A  84     -11.053  -9.633 -25.130  9.00  0.00           C  
ATOM   2655  O2   DC A  84     -11.691 -10.208 -26.070  5.00  0.00           O  
ATOM   2656  N3   DC A  84     -11.844  -9.135 -24.190  9.00  0.00           N  
ATOM   2657  C4   DC A  84     -11.318  -8.378 -23.260  7.00  0.00           C  
ATOM   2658  N4   DC A  84     -12.075  -7.786 -22.410  2.00  0.00           N  
ATOM   2659  C5   DC A  84      -9.890  -8.184 -23.190  6.00  0.00           C  
ATOM   2660  C6   DC A  84      -9.047  -8.853 -24.060  0.00  0.00           C  
ATOM   2661  OP1  DC A  84      -2.785 -10.479 -24.710  5.00  0.00           O  
ATOM   2662  OP2  DC A  84      -3.555  -8.082 -24.450  1.00  0.00           O1-
ATOM   2663  H5   DC A  84      -9.456  -7.516 -22.450  7.00  0.00           H  
ATOM   2664  H6   DC A  84      -7.940  -8.695 -23.960  4.00  0.00           H  
ATOM   2665  H1'  DC A  84      -9.411 -10.924 -26.670  3.00  0.00           H  
ATOM   2666  H2'  DC A  84      -7.232  -8.997 -26.170  2.00  0.00           H  
ATOM   2667  H3'  DC A  84      -5.702 -10.247 -27.190  7.00  0.00           H  
ATOM   2668  H4'  DC A  84      -6.574 -12.616 -26.340  1.00  0.00           H  
ATOM   2669  H41  DC A  84     -13.100  -7.878 -22.550  0.00  0.00           H  
ATOM   2670  H5'  DC A  84      -5.806 -11.863 -24.040  5.00  0.00           H  
ATOM   2671  H42  DC A  84     -11.617  -7.296 -21.670  3.00  0.00           H  
ATOM   2672 H2''  DC A  84      -8.149  -9.322 -27.620  8.00  0.00           H  
ATOM   2673 H5''  DC A  84      -4.655 -11.876 -25.420  2.00  0.00           H  
ATOM   2674  P    DT A  85      -6.728 -10.735 -29.740  0.00  0.00           P  
ATOM   2675  C5'  DT A  85      -9.032 -11.840 -30.230  5.00  0.00           C  
ATOM   2676  O5'  DT A  85      -8.259 -10.615 -30.050  8.00  0.00           O  
ATOM   2677  C4'  DT A  85     -10.533 -11.542 -30.380  3.00  0.00           C  
ATOM   2678  O4'  DT A  85     -10.850 -10.723 -29.310  7.00  0.00           O  
ATOM   2679  C3'  DT A  85     -10.832 -10.902 -31.690  1.00  0.00           C  
ATOM   2680  O3'  DT A  85     -11.995 -11.330 -32.410  7.00  0.00           O  
ATOM   2681  C2'  DT A  85     -11.073  -9.483 -31.130  4.00  0.00           C  
ATOM   2682  C1'  DT A  85     -11.590  -9.606 -29.760  7.00  0.00           C  
ATOM   2683  N1   DT A  85     -11.425  -8.507 -28.750  6.00  0.00           N  
ATOM   2684  C2   DT A  85     -12.610  -8.083 -28.090  6.00  0.00           C  
ATOM   2685  O2   DT A  85     -13.758  -8.462 -28.480  3.00  0.00           O  
ATOM   2686  N3   DT A  85     -12.497  -7.089 -27.130  6.00  0.00           N  
ATOM   2687  C4   DT A  85     -11.288  -6.733 -26.570  9.00  0.00           C  
ATOM   2688  O4   DT A  85     -11.243  -6.228 -25.450  5.00  0.00           O  
ATOM   2689  C5   DT A  85     -10.118  -7.118 -27.380  5.00  0.00           C  
ATOM   2690  C6   DT A  85     -10.219  -7.945 -28.490  4.00  0.00           C  
ATOM   2691  C7   DT A  85      -8.746  -6.645 -26.990  3.00  0.00           C  
ATOM   2692  OP1  DT A  85      -6.126 -11.760 -30.600  4.00  0.00           O  
ATOM   2693  OP2  DT A  85      -6.121  -9.391 -29.580  9.00  0.00           O1-
ATOM   2694  H3   DT A  85     -13.388  -6.707 -26.650  7.00  0.00           H  
ATOM   2695  H6   DT A  85      -9.382  -8.168 -29.070  8.00  0.00           H  
ATOM   2696  H1'  DT A  85     -12.637  -9.936 -29.820  1.00  0.00           H  
ATOM   2697  H2'  DT A  85     -10.235  -8.763 -31.120  3.00  0.00           H  
ATOM   2698  H3'  DT A  85      -9.886 -10.835 -32.270  9.00  0.00           H  
ATOM   2699  H4'  DT A  85     -11.122 -12.436 -30.210  8.00  0.00           H  
ATOM   2700  H5'  DT A  85      -8.907 -12.455 -29.320  9.00  0.00           H  
ATOM   2701  H71  DT A  85      -8.045  -7.008 -27.700  7.00  0.00           H  
ATOM   2702  H72  DT A  85      -8.832  -5.520 -27.050  5.00  0.00           H  
ATOM   2703  H73  DT A  85      -8.465  -6.975 -26.040  2.00  0.00           H  
ATOM   2704 H2''  DT A  85     -11.814  -9.002 -31.700  2.00  0.00           H  
ATOM   2705 H5''  DT A  85      -8.711 -12.367 -31.120  3.00  0.00           H  
ATOM   2706  P    DA A  86     -12.325 -10.969 -33.940  4.00  0.00           P  
ATOM   2707  C5'  DA A  86     -14.682  -9.834 -33.810  9.00  0.00           C  
ATOM   2708  O5'  DA A  86     -13.268  -9.669 -33.860  5.00  0.00           O  
ATOM   2709  C4'  DA A  86     -15.423  -8.552 -33.510  3.00  0.00           C  
ATOM   2710  O4'  DA A  86     -15.066  -8.123 -32.170  8.00  0.00           O  
ATOM   2711  C3'  DA A  86     -15.054  -7.394 -34.470  7.00  0.00           C  
ATOM   2712  O3'  DA A  86     -16.179  -6.546 -34.650  6.00  0.00           O  
ATOM   2713  C2'  DA A  86     -14.093  -6.608 -33.580  5.00  0.00           C  
ATOM   2714  C1'  DA A  86     -14.759  -6.721 -32.220  6.00  0.00           C  
ATOM   2715  N1   DA A  86     -15.581  -4.314 -27.830  8.00  0.00           N  
ATOM   2716  C2   DA A  86     -16.395  -4.849 -28.720  7.00  0.00           C  
ATOM   2717  N3   DA A  86     -16.152  -5.465 -29.830  2.00  0.00           N  
ATOM   2718  C4   DA A  86     -14.807  -5.511 -30.110  2.00  0.00           C  
ATOM   2719  C5   DA A  86     -13.841  -4.988 -29.300  8.00  0.00           C  
ATOM   2720  C6   DA A  86     -14.340  -4.360 -28.150  7.00  0.00           C  
ATOM   2721  N6   DA A  86     -13.573  -3.768 -27.340  6.00  0.00           N  
ATOM   2722  N7   DA A  86     -12.510  -5.168 -29.820  6.00  0.00           N  
ATOM   2723  C8   DA A  86     -12.726  -5.853 -30.950  0.00  0.00           C  
ATOM   2724  N9   DA A  86     -14.063  -6.126 -31.090  3.00  0.00           N  
ATOM   2725  OP1  DA A  86     -13.098 -12.092 -34.450  8.00  0.00           O  
ATOM   2726  OP2  DA A  86     -11.035 -10.630 -34.550  3.00  0.00           O1-
ATOM   2727  H2   DA A  86     -17.422  -4.677 -28.470  1.00  0.00           H  
ATOM   2728  H8   DA A  86     -11.933  -6.075 -31.680  2.00  0.00           H  
ATOM   2729  H1'  DA A  86     -15.661  -6.126 -32.510  6.00  0.00           H  
ATOM   2730  H2'  DA A  86     -13.125  -7.095 -33.500  4.00  0.00           H  
ATOM   2731  H3'  DA A  86     -14.626  -7.734 -35.420  6.00  0.00           H  
ATOM   2732  H4'  DA A  86     -16.427  -8.760 -33.600  4.00  0.00           H  
ATOM   2733  H5'  DA A  86     -15.000 -10.517 -33.070  8.00  0.00           H  
ATOM   2734  H61  DA A  86     -14.128  -3.361 -26.660  0.00  0.00           H  
ATOM   2735  H62  DA A  86     -12.633  -3.472 -27.580  2.00  0.00           H  
ATOM   2736 H2''  DA A  86     -14.213  -5.518 -33.750  2.00  0.00           H  
ATOM   2737 H5''  DA A  86     -14.991 -10.160 -34.790  5.00  0.00           H  
ATOM   2738  P    DA A  87     -16.603  -6.069 -36.110  1.00  0.00           P  
ATOM   2739  C5'  DA A  87     -19.055  -6.240 -35.510  8.00  0.00           C  
ATOM   2740  O5'  DA A  87     -17.984  -5.328 -35.940  5.00  0.00           O  
ATOM   2741  C4'  DA A  87     -20.035  -5.622 -34.490  3.00  0.00           C  
ATOM   2742  O4'  DA A  87     -19.308  -5.300 -33.350  1.00  0.00           O  
ATOM   2743  C3'  DA A  87     -20.788  -4.304 -34.970  7.00  0.00           C  
ATOM   2744  O3'  DA A  87     -22.135  -4.149 -34.590  2.00  0.00           O  
ATOM   2745  C2'  DA A  87     -19.949  -3.271 -34.260  4.00  0.00           C  
ATOM   2746  C1'  DA A  87     -19.549  -3.886 -33.030  2.00  0.00           C  
ATOM   2747  N1   DA A  87     -17.056  -1.490 -29.190  6.00  0.00           N  
ATOM   2748  C2   DA A  87     -18.336  -1.728 -29.360  1.00  0.00           C  
ATOM   2749  N3   DA A  87     -18.895  -2.393 -30.340  2.00  0.00           N  
ATOM   2750  C4   DA A  87     -18.001  -2.726 -31.280  7.00  0.00           C  
ATOM   2751  C5   DA A  87     -16.651  -2.543 -31.250  3.00  0.00           C  
ATOM   2752  C6   DA A  87     -16.204  -1.848 -30.150  0.00  0.00           C  
ATOM   2753  N6   DA A  87     -14.937  -1.563 -29.860  2.00  0.00           N  
ATOM   2754  N7   DA A  87     -15.997  -3.147 -32.380  6.00  0.00           N  
ATOM   2755  C8   DA A  87     -16.962  -3.617 -33.090  4.00  0.00           C  
ATOM   2756  N9   DA A  87     -18.273  -3.330 -32.530  8.00  0.00           N  
ATOM   2757  OP1  DA A  87     -16.740  -7.293 -36.910  6.00  0.00           O  
ATOM   2758  OP2  DA A  87     -15.616  -5.057 -36.560  9.00  0.00           O1-
ATOM   2759  H2   DA A  87     -19.037  -1.502 -28.590  4.00  0.00           H  
ATOM   2760  H8   DA A  87     -16.713  -4.069 -33.960  7.00  0.00           H  
ATOM   2761  H1'  DA A  87     -20.330  -3.800 -32.240  0.00  0.00           H  
ATOM   2762  H2'  DA A  87     -19.105  -3.076 -34.960  5.00  0.00           H  
ATOM   2763  H3'  DA A  87     -20.798  -4.105 -36.060  7.00  0.00           H  
ATOM   2764  H4'  DA A  87     -20.848  -6.266 -34.270  1.00  0.00           H  
ATOM   2765  H5'  DA A  87     -18.614  -7.093 -34.970  9.00  0.00           H  
ATOM   2766  H61  DA A  87     -14.671  -1.218 -28.940  8.00  0.00           H  
ATOM   2767  H62  DA A  87     -14.337  -1.765 -30.650  8.00  0.00           H  
ATOM   2768 H2''  DA A  87     -20.397  -2.283 -34.160  3.00  0.00           H  
ATOM   2769 H5''  DA A  87     -19.590  -6.558 -36.440  4.00  0.00           H  
ATOM   2770  P    DC A  88     -23.036  -2.898 -35.100  1.00  0.00           P  
ATOM   2771  C5'  DC A  88     -23.379  -1.550 -32.990  1.00  0.00           C  
ATOM   2772  O5'  DC A  88     -22.761  -1.656 -34.220  0.00  0.00           O  
ATOM   2773  C4'  DC A  88     -22.844  -0.450 -32.090  2.00  0.00           C  
ATOM   2774  O4'  DC A  88     -21.458  -0.714 -31.940  3.00  0.00           O  
ATOM   2775  C3'  DC A  88     -23.084   1.051 -32.510  4.00  0.00           C  
ATOM   2776  O3'  DC A  88     -23.736   1.876 -31.490  5.00  0.00           O  
ATOM   2777  C2'  DC A  88     -21.586   1.463 -32.660  6.00  0.00           C  
ATOM   2778  C1'  DC A  88     -20.857   0.545 -31.710  4.00  0.00           C  
ATOM   2779  N1   DC A  88     -19.392   0.613 -32.060  3.00  0.00           N  
ATOM   2780  C2   DC A  88     -18.516   1.086 -31.040  4.00  0.00           C  
ATOM   2781  O2   DC A  88     -18.974   1.500 -29.960  6.00  0.00           O  
ATOM   2782  N3   DC A  88     -17.156   1.150 -31.220  6.00  0.00           N  
ATOM   2783  C4   DC A  88     -16.700   0.612 -32.390  1.00  0.00           C  
ATOM   2784  N4   DC A  88     -15.417   0.618 -32.550  0.00  0.00           N  
ATOM   2785  C5   DC A  88     -17.508   0.116 -33.380  7.00  0.00           C  
ATOM   2786  C6   DC A  88     -18.833   0.016 -33.170  3.00  0.00           C  
ATOM   2787  OP1  DC A  88     -24.425  -3.321 -34.910  7.00  0.00           O  
ATOM   2788  OP2  DC A  88     -22.656  -2.519 -36.480  0.00  0.00           O1-
ATOM   2789  H5   DC A  88     -17.047  -0.407 -34.170  9.00  0.00           H  
ATOM   2790  H6   DC A  88     -19.499  -0.365 -33.890  3.00  0.00           H  
ATOM   2791  H1'  DC A  88     -21.074   0.886 -30.660  0.00  0.00           H  
ATOM   2792  H2'  DC A  88     -21.347   1.285 -33.680  9.00  0.00           H  
ATOM   2793  H3'  DC A  88     -23.643   1.112 -33.420  0.00  0.00           H  
ATOM   2794  H4'  DC A  88     -23.400  -0.474 -31.170  8.00  0.00           H  
ATOM   2795  H41  DC A  88     -14.848   0.922 -31.800  7.00  0.00           H  
ATOM   2796  H5'  DC A  88     -23.272  -2.497 -32.460  3.00  0.00           H  
ATOM   2797  H42  DC A  88     -15.094   0.113 -33.370  1.00  0.00           H  
ATOM   2798 H2''  DC A  88     -21.387   2.483 -32.370  5.00  0.00           H  
ATOM   2799 H5''  DC A  88     -24.493  -1.333 -33.060  8.00  0.00           H  
ATOM   2800  P    DC A  89     -24.181   3.427 -31.760  8.00  0.00           P  
ATOM   2801  C5'  DC A  89     -22.978   4.317 -29.660  6.00  0.00           C  
ATOM   2802  O5'  DC A  89     -22.969   4.142 -31.060  8.00  0.00           O  
ATOM   2803  C4'  DC A  89     -22.043   5.398 -29.240  0.00  0.00           C  
ATOM   2804  O4'  DC A  89     -20.711   5.058 -29.470  0.00  0.00           O  
ATOM   2805  C3'  DC A  89     -22.354   6.728 -29.940  8.00  0.00           C  
ATOM   2806  O3'  DC A  89     -22.239   7.914 -29.080  7.00  0.00           O  
ATOM   2807  C2'  DC A  89     -21.206   6.756 -30.940  2.00  0.00           C  
ATOM   2808  C1'  DC A  89     -20.015   6.105 -30.210  6.00  0.00           C  
ATOM   2809  N1   DC A  89     -19.022   5.489 -31.180  7.00  0.00           N  
ATOM   2810  C2   DC A  89     -17.687   5.848 -31.090  3.00  0.00           C  
ATOM   2811  O2   DC A  89     -17.251   6.612 -30.240  9.00  0.00           O  
ATOM   2812  N3   DC A  89     -16.820   5.330 -32.030  1.00  0.00           N  
ATOM   2813  C4   DC A  89     -17.255   4.371 -32.840  0.00  0.00           C  
ATOM   2814  N4   DC A  89     -16.295   3.699 -33.460  5.00  0.00           N  
ATOM   2815  C5   DC A  89     -18.552   3.847 -32.790  0.00  0.00           C  
ATOM   2816  C6   DC A  89     -19.509   4.521 -32.070  7.00  0.00           C  
ATOM   2817  OP1  DC A  89     -25.459   3.565 -31.030  3.00  0.00           O  
ATOM   2818  OP2  DC A  89     -24.189   3.759 -33.200  6.00  0.00           O1-
ATOM   2819  H5   DC A  89     -18.857   3.032 -33.490  2.00  0.00           H  
ATOM   2820  H6   DC A  89     -20.539   4.227 -32.000  8.00  0.00           H  
ATOM   2821  H1'  DC A  89     -19.461   6.861 -29.570  7.00  0.00           H  
ATOM   2822  H2'  DC A  89     -21.506   6.057 -31.750  4.00  0.00           H  
ATOM   2823  H3'  DC A  89     -23.340   6.787 -30.500  8.00  0.00           H  
ATOM   2824  H4'  DC A  89     -22.176   5.653 -28.210  5.00  0.00           H  
ATOM   2825  H41  DC A  89     -15.357   3.983 -33.260  9.00  0.00           H  
ATOM   2826  H5'  DC A  89     -22.766   3.375 -29.180  5.00  0.00           H  
ATOM   2827  H42  DC A  89     -16.537   2.985 -34.130  0.00  0.00           H  
ATOM   2828 H2''  DC A  89     -20.882   7.657 -31.330  0.00  0.00           H  
ATOM   2829 H5''  DC A  89     -24.006   4.538 -29.370  6.00  0.00           H  
ATOM   2830  P   DC3 A  90     -22.383   9.386 -29.650  2.00  0.00           P  
ATOM   2831  C5' DC3 A  90     -19.876  10.208 -29.380  4.00  0.00           C  
ATOM   2832  O5' DC3 A  90     -20.987   9.921 -30.220  9.00  0.00           O  
ATOM   2833  C4' DC3 A  90     -18.606  10.529 -30.170  3.00  0.00           C  
ATOM   2834  O4' DC3 A  90     -18.286   9.402 -31.000  3.00  0.00           O  
ATOM   2835  C3' DC3 A  90     -18.452  11.776 -31.110  3.00  0.00           C  
ATOM   2836  O3' DC3 A  90     -17.375  12.628 -30.820  2.00  0.00           O  
ATOM   2837  C2' DC3 A  90     -18.236  11.180 -32.470  3.00  0.00           C  
ATOM   2838  C1' DC3 A  90     -17.504   9.883 -32.120  7.00  0.00           C  
ATOM   2839  N1  DC3 A  90     -17.487   8.953 -33.320  5.00  0.00           N  
ATOM   2840  C2  DC3 A  90     -16.262   8.792 -34.030  3.00  0.00           C  
ATOM   2841  O2  DC3 A  90     -15.255   9.418 -33.740  0.00  0.00           O  
ATOM   2842  N3  DC3 A  90     -16.136   7.903 -35.040  5.00  0.00           N  
ATOM   2843  C4  DC3 A  90     -17.198   7.150 -35.260  1.00  0.00           C  
ATOM   2844  N4  DC3 A  90     -16.999   6.180 -36.040  9.00  0.00           N  
ATOM   2845  C5  DC3 A  90     -18.427   7.107 -34.500  0.00  0.00           C  
ATOM   2846  C6  DC3 A  90     -18.574   8.115 -33.620  4.00  0.00           C  
ATOM   2847  OP1 DC3 A  90     -22.760  10.290 -28.560  0.00  0.00           O  
ATOM   2848  OP2 DC3 A  90     -23.337   9.252 -30.810  4.00  0.00           O  
ATOM   2849 HO3' DC3 A  90     -17.736  13.549 -30.820  5.00  0.00           H  
ATOM   2850  H5  DC3 A  90     -19.232   6.343 -34.570  1.00  0.00           H  
ATOM   2851  H6  DC3 A  90     -19.528   8.177 -33.030  7.00  0.00           H  
ATOM   2852  H1' DC3 A  90     -16.460  10.118 -31.790  5.00  0.00           H  
ATOM   2853  H2' DC3 A  90     -19.233  10.990 -32.890  9.00  0.00           H  
ATOM   2854  H3' DC3 A  90     -19.400  12.380 -31.040  4.00  0.00           H  
ATOM   2855  H4' DC3 A  90     -17.837  10.750 -29.410  5.00  0.00           H  
ATOM   2856  H41 DC3 A  90     -16.097   6.055 -36.450  2.00  0.00           H  
ATOM   2857  H5' DC3 A  90     -19.662   9.305 -28.800  1.00  0.00           H  
ATOM   2858  H42 DC3 A  90     -17.628   5.429 -35.920  2.00  0.00           H  
ATOM   2859 H2'' DC3 A  90     -17.620  11.796 -33.160  8.00  0.00           H  
ATOM   2860 H5'' DC3 A  90     -20.180  10.956 -28.700  5.00  0.00           H  
ATOM   2861  C   CNT A 208     -27.523  43.319   8.200  8.00  0.00           C  
ATOM   2862  C   CNT A 208     -28.600  42.633   8.870  5.00  0.00           C  
ATOM   2863  C   CNT A 208     -28.278  41.231   9.170  5.00  0.00           C  
ATOM   2864  C   CNT A 208     -29.369  40.328   9.240  1.00  0.00           C  
ATOM   2865  C   CNT A 208     -29.951  43.045   9.050  7.00  0.00           C  
ATOM   2866  C   CNT A 208     -30.913  42.081   8.530  8.00  0.00           C  
ATOM   2867  C   CNT A 208     -30.638  40.687   8.730  8.00  0.00           C  
ATOM   2868  C   CNT A 208     -31.553  39.660   8.430  7.00  0.00           C  
ATOM   2869  C   CNT A 208     -31.887  42.324   7.550  9.00  0.00           C  
ATOM   2870  C   CNT A 208     -32.853  41.393   7.180  1.00  0.00           C  
ATOM   2871  C   CNT A 208     -32.645  40.032   7.680  3.00  0.00           C  
ATOM   2872  C   CNT A 208     -33.351  38.999   7.010  1.00  0.00           C  
ATOM   2873  C   CNT A 208     -33.968  41.567   6.350  1.00  0.00           C  
ATOM   2874  C   CNT A 208     -34.755  40.569   5.750  1.00  0.00           C  
ATOM   2875  C   CNT A 208     -34.422  39.280   6.110  7.00  0.00           C  
ATOM   2876  C   CNT A 208     -34.902  38.164   5.400  2.00  0.00           C  
ATOM   2877  C   CNT A 208     -35.669  40.670   4.690  8.00  0.00           C  
ATOM   2878  C   CNT A 208     -36.071  39.628   3.850  2.00  0.00           C  
ATOM   2879  C   CNT A 208     -35.677  38.306   4.230  7.00  0.00           C  
ATOM   2880  C   CNT A 208     -35.785  37.283   3.280  1.00  0.00           C  
ATOM   2881  C   CNT A 208     -36.690  39.726   2.580  7.00  0.00           C  
ATOM   2882  C   CNT A 208     -36.514  38.781   1.570  1.00  0.00           C  
ATOM   2883  C   CNT A 208     -36.180  37.522   1.950  8.00  0.00           C  
ATOM   2884  C   CNT A 208     -36.210  36.458   1.040  6.00  0.00           C  
ATOM   2885  C   CNT A 208     -36.670  39.044   0.210  8.00  0.00           C  
ATOM   2886  C   CNT A 208     -36.575  38.095  -0.860  1.00  0.00           C  
ATOM   2887  C   CNT A 208     -36.211  36.756  -0.340  6.00  0.00           C  
ATOM   2888  C   CNT A 208     -35.541  35.928  -1.270  0.00  0.00           C  
ATOM   2889  C   CNT A 208     -36.550  38.303  -2.240  7.00  0.00           C  
ATOM   2890  C   CNT A 208     -35.577  37.616  -3.040  1.00  0.00           C  
ATOM   2891  C   CNT A 208     -35.082  36.384  -2.500  7.00  0.00           C  
ATOM   2892  C   CNT A 208     -34.256  35.568  -3.300  2.00  0.00           C  
ATOM   2893  C   CNT A 208     -35.042  37.888  -4.300  5.00  0.00           C  
ATOM   2894  C   CNT A 208     -33.903  37.369  -4.910  5.00  0.00           C  
ATOM   2895  C   CNT A 208     -33.556  36.108  -4.420  9.00  0.00           C  
ATOM   2896  C   CNT A 208     -32.312  35.535  -4.800  0.00  0.00           C  
ATOM   2897  C   CNT A 208     -33.004  37.970  -5.860  7.00  0.00           C  
ATOM   2898  C   CNT A 208     -31.640  37.629  -5.900  6.00  0.00           C  
ATOM   2899  C   CNT A 208     -31.316  36.354  -5.400  6.00  0.00           C  
ATOM   2900  C   CNT A 208     -29.988  35.831  -5.450  8.00  0.00           C  
ATOM   2901  C   CNT A 208     -30.537  38.278  -6.530  4.00  0.00           C  
ATOM   2902  C   CNT A 208     -29.228  38.035  -6.130  9.00  0.00           C  
ATOM   2903  C   CNT A 208     -28.892  36.702  -5.730  9.00  0.00           C  
ATOM   2904  C   CNT A 208     -27.589  36.356  -5.410  0.00  0.00           C  
ATOM   2905  C   CNT A 208     -28.195  38.979  -5.890  5.00  0.00           C  
ATOM   2906  C   CNT A 208     -26.872  38.672  -5.600  7.00  0.00           C  
ATOM   2907  C   CNT A 208     -26.590  37.323  -5.340  1.00  0.00           C  
ATOM   2908  C   CNT A 208     -25.336  37.008  -4.780  3.00  0.00           C  
ATOM   2909  C   CNT A 208     -25.792  39.569  -5.550  1.00  0.00           C  
ATOM   2910  C   CNT A 208     -24.529  39.291  -5.140  5.00  0.00           C  
ATOM   2911  C   CNT A 208     -24.333  37.956  -4.600  3.00  0.00           C  
ATOM   2912  C   CNT A 208     -23.289  37.688  -3.700  6.00  0.00           C  
ATOM   2913  C   CNT A 208     -23.338  40.114  -5.010  4.00  0.00           C  
ATOM   2914  C   CNT A 208     -22.660  40.051  -3.770  4.00  0.00           C  
ATOM   2915  C   CNT A 208     -22.531  38.760  -3.190  1.00  0.00           C  
ATOM   2916  C   CNT A 208     -21.846  38.473  -2.010  1.00  0.00           C  
ATOM   2917  C   CNT A 208     -22.085  41.087  -2.950  7.00  0.00           C  
ATOM   2918  C   CNT A 208     -21.694  40.788  -1.610  1.00  0.00           C  
ATOM   2919  C   CNT A 208     -21.562  39.531  -1.170  0.00  0.00           C  
ATOM   2920  C   CNT A 208     -21.194  39.296   0.150  6.00  0.00           C  
ATOM   2921  C   CNT A 208     -21.772  41.797  -0.590  6.00  0.00           C  
ATOM   2922  C   CNT A 208     -21.124  41.670   0.700  2.00  0.00           C  
ATOM   2923  C   CNT A 208     -21.016  40.330   1.080  9.00  0.00           C  
ATOM   2924  C   CNT A 208     -20.830  39.977   2.440  4.00  0.00           C  
ATOM   2925  C   CNT A 208     -20.742  42.623   1.670  8.00  0.00           C  
ATOM   2926  C   CNT A 208     -21.075  42.322   3.040  1.00  0.00           C  
ATOM   2927  C   CNT A 208     -21.025  40.960   3.420  0.00  0.00           C  
ATOM   2928  C   CNT A 208     -21.413  40.512   4.660  5.00  0.00           C  
ATOM   2929  C   CNT A 208     -21.617  43.140   4.060  5.00  0.00           C  
ATOM   2930  C   CNT A 208     -22.210  42.749   5.240  6.00  0.00           C  
ATOM   2931  C   CNT A 208     -22.148  41.328   5.490  9.00  0.00           C  
ATOM   2932  C   CNT A 208     -22.935  40.772   6.560  3.00  0.00           C  
ATOM   2933  C   CNT A 208     -23.030  43.481   6.170  2.00  0.00           C  
ATOM   2934  C   CNT A 208     -24.062  42.933   6.940  3.00  0.00           C  
ATOM   2935  C   CNT A 208     -23.832  41.584   7.310  7.00  0.00           C  
ATOM   2936  C   CNT A 208     -24.755  40.933   8.120  3.00  0.00           C  
ATOM   2937  C   CNT A 208     -25.298  43.391   7.280  8.00  0.00           C  
ATOM   2938  C   CNT A 208     -26.243  42.800   8.110  0.00  0.00           C  
ATOM   2939  C   CNT A 208     -25.998  41.470   8.450  6.00  0.00           C  
ATOM   2940  C   CNT A 208     -26.985  40.794   9.100  9.00  0.00           C  
ATOM   2941  C   CNT A 208     -26.698  39.463   9.450  3.00  0.00           C  
ATOM   2942  C   CNT A 208     -27.741  38.563   9.750  5.00  0.00           C  
ATOM   2943  C   CNT A 208     -27.444  37.271  10.190  2.00  0.00           C  
ATOM   2944  C   CNT A 208     -28.522  36.410  10.330  2.00  0.00           C  
ATOM   2945  C   CNT A 208     -29.052  39.007   9.570  8.00  0.00           C  
ATOM   2946  C   CNT A 208     -30.090  38.096   9.520  8.00  0.00           C  
ATOM   2947  C   CNT A 208     -29.818  36.753   9.930  2.00  0.00           C  
ATOM   2948  C   CNT A 208     -30.790  35.818   9.650  2.00  0.00           C  
ATOM   2949  C   CNT A 208     -31.310  38.387   8.900  0.00  0.00           C  
ATOM   2950  C   CNT A 208     -32.062  37.383   8.380  4.00  0.00           C  
ATOM   2951  C   CNT A 208     -31.847  36.084   8.750  0.00  0.00           C  
ATOM   2952  C   CNT A 208     -32.566  35.053   8.170  5.00  0.00           C  
ATOM   2953  C   CNT A 208     -33.064  37.659   7.380  0.00  0.00           C  
ATOM   2954  C   CNT A 208     -33.708  36.578   6.790  5.00  0.00           C  
ATOM   2955  C   CNT A 208     -33.480  35.232   7.130  2.00  0.00           C  
ATOM   2956  C   CNT A 208     -34.012  34.163   6.430  5.00  0.00           C  
ATOM   2957  C   CNT A 208     -34.537  36.839   5.700  5.00  0.00           C  
ATOM   2958  C   CNT A 208     -35.011  35.762   4.920  2.00  0.00           C  
ATOM   2959  C   CNT A 208     -34.678  34.441   5.260  6.00  0.00           C  
ATOM   2960  C   CNT A 208     -35.056  33.354   4.520  1.00  0.00           C  
ATOM   2961  C   CNT A 208     -35.646  35.957   3.710  3.00  0.00           C  
ATOM   2962  C   CNT A 208     -35.686  34.913   2.790  0.00  0.00           C  
ATOM   2963  C   CNT A 208     -35.423  33.617   3.150  7.00  0.00           C  
ATOM   2964  C   CNT A 208     -35.264  32.587   2.200  2.00  0.00           C  
ATOM   2965  C   CNT A 208     -35.948  35.165   1.410  6.00  0.00           C  
ATOM   2966  C   CNT A 208     -35.651  34.173   0.420  1.00  0.00           C  
ATOM   2967  C   CNT A 208     -35.269  32.876   0.830  4.00  0.00           C  
ATOM   2968  C   CNT A 208     -34.755  31.980  -0.060  5.00  0.00           C  
ATOM   2969  C   CNT A 208     -35.216  34.641  -0.870  6.00  0.00           C  
ATOM   2970  C   CNT A 208     -34.552  33.778  -1.700  4.00  0.00           C  
ATOM   2971  C   CNT A 208     -34.219  32.459  -1.220  4.00  0.00           C  
ATOM   2972  C   CNT A 208     -33.288  31.748  -1.940  0.00  0.00           C  
ATOM   2973  C   CNT A 208     -33.973  34.266  -2.860  9.00  0.00           C  
ATOM   2974  C   CNT A 208     -32.769  33.695  -3.350  4.00  0.00           C  
ATOM   2975  C   CNT A 208     -32.534  32.418  -2.940  7.00  0.00           C  
ATOM   2976  C   CNT A 208     -31.395  31.758  -3.390  5.00  0.00           C  
ATOM   2977  C   CNT A 208     -32.018  34.270  -4.350  3.00  0.00           C  
ATOM   2978  C   CNT A 208     -30.731  33.722  -4.620  2.00  0.00           C  
ATOM   2979  C   CNT A 208     -30.467  32.424  -4.210  7.00  0.00           C  
ATOM   2980  C   CNT A 208     -29.157  31.977  -4.200  8.00  0.00           C  
ATOM   2981  C   CNT A 208     -29.740  34.509  -5.110  7.00  0.00           C  
ATOM   2982  C   CNT A 208     -28.388  34.111  -5.050  8.00  0.00           C  
ATOM   2983  C   CNT A 208     -28.098  32.834  -4.620  8.00  0.00           C  
ATOM   2984  C   CNT A 208     -26.793  32.409  -4.410  3.00  0.00           C  
ATOM   2985  C   CNT A 208     -27.334  35.054  -5.100  6.00  0.00           C  
ATOM   2986  C   CNT A 208     -26.016  34.659  -4.760  5.00  0.00           C  
ATOM   2987  C   CNT A 208     -25.747  33.324  -4.430  0.00  0.00           C  
ATOM   2988  C   CNT A 208     -24.556  32.971  -3.850  0.00  0.00           C  
ATOM   2989  C   CNT A 208     -25.152  35.683  -4.350  2.00  0.00           C  
ATOM   2990  C   CNT A 208     -23.966  35.327  -3.710  0.00  0.00           C  
ATOM   2991  C   CNT A 208     -23.684  34.001  -3.400  7.00  0.00           C  
ATOM   2992  C   CNT A 208     -22.587  33.677  -2.610  4.00  0.00           C  
ATOM   2993  C   CNT A 208     -23.056  36.362  -3.390  7.00  0.00           C  
ATOM   2994  C   CNT A 208     -22.212  36.094  -2.300  1.00  0.00           C  
ATOM   2995  C   CNT A 208     -21.878  34.744  -1.970  7.00  0.00           C  
ATOM   2996  C   CNT A 208     -21.194  34.480  -0.790  7.00  0.00           C  
ATOM   2997  C   CNT A 208     -21.752  37.174  -1.590  4.00  0.00           C  
ATOM   2998  C   CNT A 208     -21.149  36.930  -0.340  9.00  0.00           C  
ATOM   2999  C   CNT A 208     -20.851  35.592   0.020  4.00  0.00           C  
ATOM   3000  C   CNT A 208     -20.237  35.370   1.260  4.00  0.00           C  
ATOM   3001  C   CNT A 208     -20.855  37.962   0.520  8.00  0.00           C  
ATOM   3002  C   CNT A 208     -20.476  37.643   1.830  3.00  0.00           C  
ATOM   3003  C   CNT A 208     -20.253  36.343   2.250  5.00  0.00           C  
ATOM   3004  C   CNT A 208     -20.048  36.038   3.600  4.00  0.00           C  
ATOM   3005  C   CNT A 208     -20.515  38.650   2.810  1.00  0.00           C  
ATOM   3006  C   CNT A 208     -20.637  38.251   4.160  3.00  0.00           C  
ATOM   3007  C   CNT A 208     -20.352  36.968   4.590  5.00  0.00           C  
ATOM   3008  C   CNT A 208     -20.657  36.600   5.950  5.00  0.00           C  
ATOM   3009  C   CNT A 208     -21.234  39.177   5.040  7.00  0.00           C  
ATOM   3010  C   CNT A 208     -21.706  38.760   6.260  4.00  0.00           C  
ATOM   3011  C   CNT A 208     -21.352  37.479   6.760  4.00  0.00           C  
ATOM   3012  C   CNT A 208     -21.959  36.949   7.950  5.00  0.00           C  
ATOM   3013  C   CNT A 208     -22.643  39.497   6.960  7.00  0.00           C  
ATOM   3014  C   CNT A 208     -23.340  38.925   8.040  5.00  0.00           C  
ATOM   3015  C   CNT A 208     -23.038  37.609   8.430  7.00  0.00           C  
ATOM   3016  C   CNT A 208     -23.848  37.049   9.410  0.00  0.00           C  
ATOM   3017  C   CNT A 208     -24.522  39.589   8.530  7.00  0.00           C  
ATOM   3018  C   CNT A 208     -25.360  38.960   9.410  9.00  0.00           C  
ATOM   3019  C   CNT A 208     -25.043  37.619   9.890  1.00  0.00           C  
ATOM   3020  C   CNT A 208     -26.104  36.832  10.380  5.00  0.00           C  
ATOM   3021  C   CNT A 208     -25.946  35.527  10.590  9.00  0.00           C  
ATOM   3022  C   CNT A 208     -27.040  34.685  10.970  2.00  0.00           C  
ATOM   3023  C   CNT A 208     -26.815  33.368  11.440  6.00  0.00           C  
ATOM   3024  C   CNT A 208     -27.870  32.472  11.520  6.00  0.00           C  
ATOM   3025  C   CNT A 208     -28.325  35.093  10.760  2.00  0.00           C  
ATOM   3026  C   CNT A 208     -29.340  34.151  10.590  7.00  0.00           C  
ATOM   3027  C   CNT A 208     -29.130  32.813  11.010  5.00  0.00           C  
ATOM   3028  C   CNT A 208     -30.043  31.863  10.780  6.00  0.00           C  
ATOM   3029  C   CNT A 208     -30.575  34.466  10.020  8.00  0.00           C  
ATOM   3030  C   CNT A 208     -31.425  33.408   9.600  9.00  0.00           C  
ATOM   3031  C   CNT A 208     -31.135  32.128  10.000  3.00  0.00           C  
ATOM   3032  C   CNT A 208     -31.932  31.077   9.450  0.00  0.00           C  
ATOM   3033  C   CNT A 208     -32.368  33.711   8.600  0.00  0.00           C  
ATOM   3034  C   CNT A 208     -33.113  32.610   8.070  4.00  0.00           C  
ATOM   3035  C   CNT A 208     -32.894  31.282   8.490  8.00  0.00           C  
ATOM   3036  C   CNT A 208     -33.435  30.221   7.770  6.00  0.00           C  
ATOM   3037  C   CNT A 208     -33.782  32.846   6.880  3.00  0.00           C  
ATOM   3038  C   CNT A 208     -34.249  31.755   6.120  3.00  0.00           C  
ATOM   3039  C   CNT A 208     -34.120  30.429   6.590  4.00  0.00           C  
ATOM   3040  C   CNT A 208     -34.590  29.358   5.800  0.00  0.00           C  
ATOM   3041  C   CNT A 208     -34.900  32.025   4.920  1.00  0.00           C  
ATOM   3042  C   CNT A 208     -35.026  31.001   3.980  6.00  0.00           C  
ATOM   3043  C   CNT A 208     -34.784  29.660   4.420  1.00  0.00           C  
ATOM   3044  C   CNT A 208     -34.709  28.618   3.460  3.00  0.00           C  
ATOM   3045  C   CNT A 208     -35.115  31.304   2.600  3.00  0.00           C  
ATOM   3046  C   CNT A 208     -34.774  30.310   1.670  5.00  0.00           C  
ATOM   3047  C   CNT A 208     -34.455  29.030   2.130  1.00  0.00           C  
ATOM   3048  C   CNT A 208     -33.897  28.135   1.230  4.00  0.00           C  
ATOM   3049  C   CNT A 208     -34.442  30.722   0.390  6.00  0.00           C  
ATOM   3050  C   CNT A 208     -33.628  29.899  -0.370  9.00  0.00           C  
ATOM   3051  C   CNT A 208     -33.339  28.601   0.040  9.00  0.00           C  
ATOM   3052  C   CNT A 208     -32.563  27.817  -0.790  4.00  0.00           C  
ATOM   3053  C   CNT A 208     -33.001  30.437  -1.540  4.00  0.00           C  
ATOM   3054  C   CNT A 208     -31.982  29.770  -2.210  9.00  0.00           C  
ATOM   3055  C   CNT A 208     -31.741  28.435  -1.860  9.00  0.00           C  
ATOM   3056  C   CNT A 208     -30.469  27.829  -2.040  9.00  0.00           C  
ATOM   3057  C   CNT A 208     -31.093  30.447  -3.030  9.00  0.00           C  
ATOM   3058  C   CNT A 208     -29.865  29.851  -3.250  7.00  0.00           C  
ATOM   3059  C   CNT A 208     -29.589  28.577  -2.880  5.00  0.00           C  
ATOM   3060  C   CNT A 208     -28.310  27.988  -3.160  7.00  0.00           C  
ATOM   3061  C   CNT A 208     -28.896  30.677  -3.820  1.00  0.00           C  
ATOM   3062  C   CNT A 208     -27.523  30.229  -3.750  4.00  0.00           C  
ATOM   3063  C   CNT A 208     -27.278  28.841  -3.510  8.00  0.00           C  
ATOM   3064  C   CNT A 208     -25.969  28.409  -3.190  2.00  0.00           C  
ATOM   3065  C   CNT A 208     -26.487  31.131  -3.930  2.00  0.00           C  
ATOM   3066  C   CNT A 208     -25.233  30.648  -3.580  5.00  0.00           C  
ATOM   3067  C   CNT A 208     -24.936  29.333  -3.190  8.00  0.00           C  
ATOM   3068  C   CNT A 208     -23.777  28.940  -2.540  9.00  0.00           C  
ATOM   3069  C   CNT A 208     -24.207  31.604  -3.540  9.00  0.00           C  
ATOM   3070  C   CNT A 208     -23.099  31.330  -2.690  9.00  0.00           C  
ATOM   3071  C   CNT A 208     -22.877  30.016  -2.300  8.00  0.00           C  
ATOM   3072  C   CNT A 208     -21.779  29.769  -1.420  9.00  0.00           C  
ATOM   3073  C   CNT A 208     -22.205  32.374  -2.340  1.00  0.00           C  
ATOM   3074  C   CNT A 208     -21.256  32.116  -1.290  1.00  0.00           C  
ATOM   3075  C   CNT A 208     -21.049  30.838  -0.870  6.00  0.00           C  
ATOM   3076  C   CNT A 208     -20.235  30.595   0.200  9.00  0.00           C  
ATOM   3077  C   CNT A 208     -20.851  33.119  -0.450  3.00  0.00           C  
ATOM   3078  C   CNT A 208     -20.253  32.928   0.790  3.00  0.00           C  
ATOM   3079  C   CNT A 208     -19.939  31.629   1.140  9.00  0.00           C  
ATOM   3080  C   CNT A 208     -19.500  31.344   2.460  1.00  0.00           C  
ATOM   3081  C   CNT A 208     -19.972  34.045   1.650  1.00  0.00           C  
ATOM   3082  C   CNT A 208     -19.664  33.728   3.010  1.00  0.00           C  
ATOM   3083  C   CNT A 208     -19.412  32.389   3.410  0.00  0.00           C  
ATOM   3084  C   CNT A 208     -19.201  32.115   4.750  4.00  0.00           C  
ATOM   3085  C   CNT A 208     -19.895  34.702   3.990  4.00  0.00           C  
ATOM   3086  C   CNT A 208     -19.885  34.373   5.350  0.00  0.00           C  
ATOM   3087  C   CNT A 208     -19.692  33.014   5.720  2.00  0.00           C  
ATOM   3088  C   CNT A 208     -19.907  32.654   7.040  9.00  0.00           C  
ATOM   3089  C   CNT A 208     -20.414  35.225   6.290  5.00  0.00           C  
ATOM   3090  C   CNT A 208     -20.878  34.828   7.510  8.00  0.00           C  
ATOM   3091  C   CNT A 208     -20.674  33.479   7.900  4.00  0.00           C  
ATOM   3092  C   CNT A 208     -21.440  32.963   8.900  2.00  0.00           C  
ATOM   3093  C   CNT A 208     -21.809  35.610   8.300  1.00  0.00           C  
ATOM   3094  C   CNT A 208     -22.662  35.017   9.220  9.00  0.00           C  
ATOM   3095  C   CNT A 208     -22.326  33.714   9.630  2.00  0.00           C  
ATOM   3096  C   CNT A 208     -23.259  33.029  10.380  9.00  0.00           C  
ATOM   3097  C   CNT A 208     -23.754  35.701   9.750  6.00  0.00           C  
ATOM   3098  C   CNT A 208     -24.703  34.961  10.460  2.00  0.00           C  
ATOM   3099  C   CNT A 208     -24.457  33.615  10.740  9.00  0.00           C  
ATOM   3100  C   CNT A 208     -25.513  32.883  11.360  1.00  0.00           C  
ATOM   3101  C   CNT A 208     -25.236  31.577  11.770  9.00  0.00           C  
ATOM   3102  C   CNT A 208     -26.294  30.739  12.190  8.00  0.00           C  
ATOM   3103  C   CNT A 208     -26.061  29.407  12.630  9.00  0.00           C  
ATOM   3104  C   CNT A 208     -27.136  28.537  12.790  7.00  0.00           C  
ATOM   3105  C   CNT A 208     -27.632  31.186  12.020  1.00  0.00           C  
ATOM   3106  C   CNT A 208     -28.653  30.242  11.940  6.00  0.00           C  
ATOM   3107  C   CNT A 208     -28.398  28.959  12.420  4.00  0.00           C  
ATOM   3108  C   CNT A 208     -29.341  27.917  12.140  7.00  0.00           C  
ATOM   3109  C   CNT A 208     -29.802  30.541  11.240  8.00  0.00           C  
ATOM   3110  C   CNT A 208     -30.708  29.504  10.910  4.00  0.00           C  
ATOM   3111  C   CNT A 208     -30.453  28.177  11.320  9.00  0.00           C  
ATOM   3112  C   CNT A 208     -31.166  27.112  10.710  1.00  0.00           C  
ATOM   3113  C   CNT A 208     -31.689  29.768   9.900  2.00  0.00           C  
ATOM   3114  C   CNT A 208     -32.413  28.708   9.290  6.00  0.00           C  
ATOM   3115  C   CNT A 208     -32.079  27.371   9.660  9.00  0.00           C  
ATOM   3116  C   CNT A 208     -32.637  26.278   8.960  1.00  0.00           C  
ATOM   3117  C   CNT A 208     -33.238  28.894   8.200  1.00  0.00           C  
ATOM   3118  C   CNT A 208     -33.724  27.850   7.430  3.00  0.00           C  
ATOM   3119  C   CNT A 208     -33.447  26.492   7.860  4.00  0.00           C  
ATOM   3120  C   CNT A 208     -33.569  25.470   6.930  0.00  0.00           C  
ATOM   3121  C   CNT A 208     -34.244  28.087   6.170  2.00  0.00           C  
ATOM   3122  C   CNT A 208     -34.206  27.072   5.240  5.00  0.00           C  
ATOM   3123  C   CNT A 208     -33.868  25.781   5.610  7.00  0.00           C  
ATOM   3124  C   CNT A 208     -33.673  24.790   4.660  7.00  0.00           C  
ATOM   3125  C   CNT A 208     -34.280  27.344   3.870  9.00  0.00           C  
ATOM   3126  C   CNT A 208     -33.882  26.414   2.910  4.00  0.00           C  
ATOM   3127  C   CNT A 208     -33.595  25.130   3.310  6.00  0.00           C  
ATOM   3128  C   CNT A 208     -33.023  24.231   2.390  4.00  0.00           C  
ATOM   3129  C   CNT A 208     -33.707  26.791   1.570  8.00  0.00           C  
ATOM   3130  C   CNT A 208     -32.902  25.977   0.760  0.00  0.00           C  
ATOM   3131  C   CNT A 208     -32.487  24.725   1.190  4.00  0.00           C  
ATOM   3132  C   CNT A 208     -31.655  23.841   0.470  7.00  0.00           C  
ATOM   3133  C   CNT A 208     -32.229  26.538  -0.310  7.00  0.00           C  
ATOM   3134  C   CNT A 208     -31.080  25.845  -0.890  8.00  0.00           C  
ATOM   3135  C   CNT A 208     -30.850  24.526  -0.490  0.00  0.00           C  
ATOM   3136  C   CNT A 208     -29.746  23.845  -1.080  6.00  0.00           C  
ATOM   3137  C   CNT A 208     -30.205  26.487  -1.770  8.00  0.00           C  
ATOM   3138  C   CNT A 208     -29.018  25.913  -2.190  9.00  0.00           C  
ATOM   3139  C   CNT A 208     -28.837  24.539  -1.840  8.00  0.00           C  
ATOM   3140  C   CNT A 208     -27.555  23.968  -1.990  9.00  0.00           C  
ATOM   3141  C   CNT A 208     -28.042  26.675  -2.720  5.00  0.00           C  
ATOM   3142  C   CNT A 208     -26.761  26.144  -2.740  1.00  0.00           C  
ATOM   3143  C   CNT A 208     -26.493  24.832  -2.450  5.00  0.00           C  
ATOM   3144  C   CNT A 208     -25.177  24.400  -2.110  4.00  0.00           C  
ATOM   3145  C   CNT A 208     -25.697  27.069  -2.910  6.00  0.00           C  
ATOM   3146  C   CNT A 208     -24.449  26.674  -2.420  8.00  0.00           C  
ATOM   3147  C   CNT A 208     -24.108  25.321  -2.140  3.00  0.00           C  
ATOM   3148  C   CNT A 208     -22.974  25.025  -1.420  5.00  0.00           C  
ATOM   3149  C   CNT A 208     -23.509  27.652  -2.130  9.00  0.00           C  
ATOM   3150  C   CNT A 208     -22.288  27.385  -1.490  3.00  0.00           C  
ATOM   3151  C   CNT A 208     -22.052  26.040  -1.160  9.00  0.00           C  
ATOM   3152  C   CNT A 208     -21.039  25.801  -0.180  3.00  0.00           C  
ATOM   3153  C   CNT A 208     -21.552  28.434  -0.940  8.00  0.00           C  
ATOM   3154  C   CNT A 208     -20.526  28.182  -0.000  7.00  0.00           C  
ATOM   3155  C   CNT A 208     -20.301  26.843   0.420  7.00  0.00           C  
ATOM   3156  C   CNT A 208     -19.487  26.643   1.540  6.00  0.00           C  
ATOM   3157  C   CNT A 208     -19.971  29.280   0.720  0.00  0.00           C  
ATOM   3158  C   CNT A 208     -19.401  29.021   1.990  3.00  0.00           C  
ATOM   3159  C   CNT A 208     -19.064  27.687   2.340  6.00  0.00           C  
ATOM   3160  C   CNT A 208     -18.432  27.472   3.590  3.00  0.00           C  
ATOM   3161  C   CNT A 208     -19.193  30.050   2.870  9.00  0.00           C  
ATOM   3162  C   CNT A 208     -18.877  29.809   4.210  9.00  0.00           C  
ATOM   3163  C   CNT A 208     -18.519  28.501   4.550  5.00  0.00           C  
ATOM   3164  C   CNT A 208     -18.512  28.193   5.910  9.00  0.00           C  
ATOM   3165  C   CNT A 208     -18.831  30.830   5.220  3.00  0.00           C  
ATOM   3166  C   CNT A 208     -18.968  30.433   6.570  6.00  0.00           C  
ATOM   3167  C   CNT A 208     -18.722  29.109   6.950  2.00  0.00           C  
ATOM   3168  C   CNT A 208     -19.195  28.740   8.210  8.00  0.00           C  
ATOM   3169  C   CNT A 208     -19.636  31.325   7.390  4.00  0.00           C  
ATOM   3170  C   CNT A 208     -20.249  30.841   8.540  0.00  0.00           C  
ATOM   3171  C   CNT A 208     -19.992  29.542   8.970  7.00  0.00           C  
ATOM   3172  C   CNT A 208     -20.546  29.042  10.140  7.00  0.00           C  
ATOM   3173  C   CNT A 208     -21.148  31.641   9.260  9.00  0.00           C  
ATOM   3174  C   CNT A 208     -21.946  31.019  10.260  4.00  0.00           C  
ATOM   3175  C   CNT A 208     -21.708  29.699  10.610  7.00  0.00           C  
ATOM   3176  C   CNT A 208     -22.509  29.103  11.590  2.00  0.00           C  
ATOM   3177  C   CNT A 208     -23.102  31.688  10.680  3.00  0.00           C  
ATOM   3178  C   CNT A 208     -23.991  30.985  11.500  6.00  0.00           C  
ATOM   3179  C   CNT A 208     -23.706  29.669  11.980  5.00  0.00           C  
ATOM   3180  C   CNT A 208     -24.683  28.948  12.730  5.00  0.00           C  
ATOM   3181  C   CNT A 208     -24.391  27.638  13.110  4.00  0.00           C  
ATOM   3182  C   CNT A 208     -25.458  26.756  13.410  0.00  0.00           C  
ATOM   3183  C   CNT A 208     -25.231  25.394  13.550  4.00  0.00           C  
ATOM   3184  C   CNT A 208     -26.279  24.505  13.750  4.00  0.00           C  
ATOM   3185  C   CNT A 208     -26.811  27.215  13.190  8.00  0.00           C  
ATOM   3186  C   CNT A 208     -27.806  26.234  13.040  7.00  0.00           C  
ATOM   3187  C   CNT A 208     -27.568  24.900  13.430  9.00  0.00           C  
ATOM   3188  C   CNT A 208     -28.496  23.915  13.140  9.00  0.00           C  
ATOM   3189  C   CNT A 208     -29.044  26.556  12.480  7.00  0.00           C  
ATOM   3190  C   CNT A 208     -29.852  25.490  12.040  0.00  0.00           C  
ATOM   3191  C   CNT A 208     -29.625  24.199  12.360  5.00  0.00           C  
ATOM   3192  C   CNT A 208     -30.442  23.139  11.920  2.00  0.00           C  
ATOM   3193  C   CNT A 208     -30.892  25.791  11.140  9.00  0.00           C  
ATOM   3194  C   CNT A 208     -31.566  24.720  10.490  8.00  0.00           C  
ATOM   3195  C   CNT A 208     -31.430  23.418  10.980  8.00  0.00           C  
ATOM   3196  C   CNT A 208     -31.979  22.282  10.260  7.00  0.00           C  
ATOM   3197  C   CNT A 208     -32.394  24.979   9.360  2.00  0.00           C  
ATOM   3198  C   CNT A 208     -32.840  23.900   8.590  8.00  0.00           C  
ATOM   3199  C   CNT A 208     -32.507  22.562   8.970  8.00  0.00           C  
ATOM   3200  C   CNT A 208     -32.686  21.484   8.080  7.00  0.00           C  
ATOM   3201  C   CNT A 208     -33.430  24.122   7.320  7.00  0.00           C  
ATOM   3202  C   CNT A 208     -33.323  23.144   6.340  6.00  0.00           C  
ATOM   3203  C   CNT A 208     -33.121  21.877   6.760  3.00  0.00           C  
ATOM   3204  C   CNT A 208     -33.035  20.783   5.760  4.00  0.00           C  
ATOM   3205  C   CNT A 208     -33.302  23.476   5.030  1.00  0.00           C  
ATOM   3206  C   CNT A 208     -33.014  22.532   4.080  2.00  0.00           C  
ATOM   3207  C   CNT A 208     -32.886  21.173   4.410  9.00  0.00           C  
ATOM   3208  C   CNT A 208     -32.244  20.242   3.540  8.00  0.00           C  
ATOM   3209  C   CNT A 208     -32.815  22.888   2.760  9.00  0.00           C  
ATOM   3210  C   CNT A 208     -32.132  22.024   1.900  9.00  0.00           C  
ATOM   3211  C   CNT A 208     -31.795  20.699   2.330  2.00  0.00           C  
ATOM   3212  C   CNT A 208     -30.971  19.948   1.500  2.00  0.00           C  
ATOM   3213  C   CNT A 208     -31.380  22.572   0.870  7.00  0.00           C  
ATOM   3214  C   CNT A 208     -30.404  21.823   0.190  3.00  0.00           C  
ATOM   3215  C   CNT A 208     -30.170  20.492   0.530  1.00  0.00           C  
ATOM   3216  C   CNT A 208     -29.060  19.845  -0.030  7.00  0.00           C  
ATOM   3217  C   CNT A 208     -29.502  22.491  -0.630  9.00  0.00           C  
ATOM   3218  C   CNT A 208     -28.305  21.845  -1.060  6.00  0.00           C  
ATOM   3219  C   CNT A 208     -28.063  20.537  -0.710  8.00  0.00           C  
ATOM   3220  C   CNT A 208     -26.801  20.028  -0.730  3.00  0.00           C  
ATOM   3221  C   CNT A 208     -27.267  22.690  -1.500  6.00  0.00           C  
ATOM   3222  C   CNT A 208     -25.972  22.199  -1.430  6.00  0.00           C  
ATOM   3223  C   CNT A 208     -25.732  20.880  -1.010  0.00  0.00           C  
ATOM   3224  C   CNT A 208     -24.400  20.485  -0.770  1.00  0.00           C  
ATOM   3225  C   CNT A 208     -24.936  23.069  -1.780  2.00  0.00           C  
ATOM   3226  C   CNT A 208     -23.622  22.779  -1.290  3.00  0.00           C  
ATOM   3227  C   CNT A 208     -23.390  21.462  -0.840  1.00  0.00           C  
ATOM   3228  C   CNT A 208     -22.153  21.143  -0.180  0.00  0.00           C  
ATOM   3229  C   CNT A 208     -22.654  23.767  -1.010  2.00  0.00           C  
ATOM   3230  C   CNT A 208     -21.628  23.444  -0.130  9.00  0.00           C  
ATOM   3231  C   CNT A 208     -21.317  22.137   0.220  9.00  0.00           C  
ATOM   3232  C   CNT A 208     -20.254  21.903   1.120  4.00  0.00           C  
ATOM   3233  C   CNT A 208     -20.744  24.475   0.180  1.00  0.00           C  
ATOM   3234  C   CNT A 208     -19.805  24.196   1.200  2.00  0.00           C  
ATOM   3235  C   CNT A 208     -19.520  22.923   1.620  3.00  0.00           C  
ATOM   3236  C   CNT A 208     -18.702  22.667   2.710  6.00  0.00           C  
ATOM   3237  C   CNT A 208     -19.182  25.306   1.880  6.00  0.00           C  
ATOM   3238  C   CNT A 208     -18.569  25.074   3.130  7.00  0.00           C  
ATOM   3239  C   CNT A 208     -18.313  23.767   3.570  0.00  0.00           C  
ATOM   3240  C   CNT A 208     -17.751  23.494   4.840  7.00  0.00           C  
ATOM   3241  C   CNT A 208     -18.204  26.120   3.980  5.00  0.00           C  
ATOM   3242  C   CNT A 208     -18.069  25.874   5.360  5.00  0.00           C  
ATOM   3243  C   CNT A 208     -17.755  24.560   5.730  3.00  0.00           C  
ATOM   3244  C   CNT A 208     -17.611  24.265   7.090  8.00  0.00           C  
ATOM   3245  C   CNT A 208     -18.323  26.862   6.310  1.00  0.00           C  
ATOM   3246  C   CNT A 208     -18.365  26.529   7.660  9.00  0.00           C  
ATOM   3247  C   CNT A 208     -18.025  25.175   8.050  2.00  0.00           C  
ATOM   3248  C   CNT A 208     -18.409  24.759   9.310  6.00  0.00           C  
ATOM   3249  C   CNT A 208     -18.982  27.390   8.550  4.00  0.00           C  
ATOM   3250  C   CNT A 208     -19.383  26.956   9.790  0.00  0.00           C  
ATOM   3251  C   CNT A 208     -19.053  25.659  10.160  6.00  0.00           C  
ATOM   3252  C   CNT A 208     -19.724  25.124  11.270  9.00  0.00           C  
ATOM   3253  C   CNT A 208     -20.172  27.798  10.540  1.00  0.00           C  
ATOM   3254  C   CNT A 208     -21.003  27.219  11.570  4.00  0.00           C  
ATOM   3255  C   CNT A 208     -20.680  25.892  12.000  5.00  0.00           C  
ATOM   3256  C   CNT A 208     -21.611  25.213  12.850  2.00  0.00           C  
ATOM   3257  C   CNT A 208     -22.229  27.765  12.020  5.00  0.00           C  
ATOM   3258  C   CNT A 208     -23.119  27.078  12.840  2.00  0.00           C  
ATOM   3259  C   CNT A 208     -22.849  25.766  13.160  7.00  0.00           C  
ATOM   3260  C   CNT A 208     -23.915  24.937  13.510  4.00  0.00           C  
ATOM   3261  C   CNT A 208     -23.635  23.600  13.770  9.00  0.00           C  
ATOM   3262  C   CNT A 208     -24.706  22.747  14.200  8.00  0.00           C  
ATOM   3263  C   CNT A 208     -24.429  21.407  14.590  3.00  0.00           C  
ATOM   3264  C   CNT A 208     -25.506  20.491  14.760  2.00  0.00           C  
ATOM   3265  C   CNT A 208     -26.063  23.186  14.080  2.00  0.00           C  
ATOM   3266  C   CNT A 208     -27.103  22.176  14.150  9.00  0.00           C  
ATOM   3267  C   CNT A 208     -26.826  20.874  14.520  3.00  0.00           C  
ATOM   3268  C   CNT A 208     -27.796  19.844  14.360  6.00  0.00           C  
ATOM   3269  C   CNT A 208     -28.364  22.544  13.600  4.00  0.00           C  
ATOM   3270  C   CNT A 208     -29.156  21.489  13.100  2.00  0.00           C  
ATOM   3271  C   CNT A 208     -28.954  20.193  13.590  4.00  0.00           C  
ATOM   3272  C   CNT A 208     -29.765  19.110  13.190  4.00  0.00           C  
ATOM   3273  C   CNT A 208     -30.292  21.786  12.330  3.00  0.00           C  
ATOM   3274  C   CNT A 208     -30.989  20.711  11.760  6.00  0.00           C  
ATOM   3275  C   CNT A 208     -30.751  19.385  12.230  1.00  0.00           C  
ATOM   3276  C   CNT A 208     -31.296  18.332  11.410  3.00  0.00           C  
ATOM   3277  C   CNT A 208     -31.789  20.976  10.620  5.00  0.00           C  
ATOM   3278  C   CNT A 208     -32.141  19.890   9.810  2.00  0.00           C  
ATOM   3279  C   CNT A 208     -31.873  18.550  10.160  3.00  0.00           C  
ATOM   3280  C   CNT A 208     -32.076  17.591   9.240  3.00  0.00           C  
ATOM   3281  C   CNT A 208     -32.505  20.183   8.470  4.00  0.00           C  
ATOM   3282  C   CNT A 208     -32.574  19.158   7.520  7.00  0.00           C  
ATOM   3283  C   CNT A 208     -32.121  17.884   7.850  9.00  0.00           C  
ATOM   3284  C   CNT A 208     -31.822  16.876   6.960  1.00  0.00           C  
ATOM   3285  C   CNT A 208     -32.658  19.513   6.210  6.00  0.00           C  
ATOM   3286  C   CNT A 208     -32.319  18.526   5.200  2.00  0.00           C  
ATOM   3287  C   CNT A 208     -31.985  17.184   5.610  5.00  0.00           C  
ATOM   3288  C   CNT A 208     -31.559  16.292   4.650  6.00  0.00           C  
ATOM   3289  C   CNT A 208     -31.957  18.952   3.940  0.00  0.00           C  
ATOM   3290  C   CNT A 208     -31.350  18.092   3.050  2.00  0.00           C  
ATOM   3291  C   CNT A 208     -31.085  16.773   3.440  8.00  0.00           C  
ATOM   3292  C   CNT A 208     -30.271  15.943   2.650  9.00  0.00           C  
ATOM   3293  C   CNT A 208     -30.666  18.644   1.950  2.00  0.00           C  
ATOM   3294  C   CNT A 208     -29.736  17.916   1.260  2.00  0.00           C  
ATOM   3295  C   CNT A 208     -29.456  16.578   1.710  3.00  0.00           C  
ATOM   3296  C   CNT A 208     -28.378  15.900   1.150  5.00  0.00           C  
ATOM   3297  C   CNT A 208     -28.862  18.514   0.350  3.00  0.00           C  
ATOM   3298  C   CNT A 208     -27.600  17.954   0.140  4.00  0.00           C  
ATOM   3299  C   CNT A 208     -27.394  16.628   0.490  2.00  0.00           C  
ATOM   3300  C   CNT A 208     -26.117  16.103   0.370  6.00  0.00           C  
ATOM   3301  C   CNT A 208     -26.545  18.695  -0.340  5.00  0.00           C  
ATOM   3302  C   CNT A 208     -25.223  18.310  -0.230  5.00  0.00           C  
ATOM   3303  C   CNT A 208     -25.014  16.937  -0.050  4.00  0.00           C  
ATOM   3304  C   CNT A 208     -23.673  16.519   0.210  3.00  0.00           C  
ATOM   3305  C   CNT A 208     -24.152  19.196  -0.390  4.00  0.00           C  
ATOM   3306  C   CNT A 208     -22.926  18.867   0.040  6.00  0.00           C  
ATOM   3307  C   CNT A 208     -22.631  17.498   0.330  6.00  0.00           C  
ATOM   3308  C   CNT A 208     -21.468  17.164   0.990  5.00  0.00           C  
ATOM   3309  C   CNT A 208     -21.975  19.820   0.240  0.00  0.00           C  
ATOM   3310  C   CNT A 208     -20.897  19.532   1.040  9.00  0.00           C  
ATOM   3311  C   CNT A 208     -20.605  18.235   1.390  6.00  0.00           C  
ATOM   3312  C   CNT A 208     -19.522  17.977   2.270  1.00  0.00           C  
ATOM   3313  C   CNT A 208     -20.037  20.570   1.510  6.00  0.00           C  
ATOM   3314  C   CNT A 208     -19.154  20.300   2.560  5.00  0.00           C  
ATOM   3315  C   CNT A 208     -18.780  18.992   2.840  9.00  0.00           C  
ATOM   3316  C   CNT A 208     -17.916  18.726   3.910  2.00  0.00           C  
ATOM   3317  C   CNT A 208     -18.487  21.362   3.160  7.00  0.00           C  
ATOM   3318  C   CNT A 208     -17.701  21.137   4.270  1.00  0.00           C  
ATOM   3319  C   CNT A 208     -17.511  19.818   4.710  7.00  0.00           C  
ATOM   3320  C   CNT A 208     -17.021  19.508   6.010  9.00  0.00           C  
ATOM   3321  C   CNT A 208     -17.427  22.163   5.180  7.00  0.00           C  
ATOM   3322  C   CNT A 208     -17.246  21.879   6.530  2.00  0.00           C  
ATOM   3323  C   CNT A 208     -17.021  20.549   6.990  0.00  0.00           C  
ATOM   3324  C   CNT A 208     -16.911  20.292   8.340  8.00  0.00           C  
ATOM   3325  C   CNT A 208     -17.454  22.892   7.510  0.00  0.00           C  
ATOM   3326  C   CNT A 208     -17.647  22.553   8.880  8.00  0.00           C  
ATOM   3327  C   CNT A 208     -17.276  21.256   9.260  7.00  0.00           C  
ATOM   3328  C   CNT A 208     -17.492  20.830  10.590  7.00  0.00           C  
ATOM   3329  C   CNT A 208     -18.210  23.511   9.730  9.00  0.00           C  
ATOM   3330  C   CNT A 208     -18.522  23.040  11.050  8.00  0.00           C  
ATOM   3331  C   CNT A 208     -18.216  21.673  11.440  1.00  0.00           C  
ATOM   3332  C   CNT A 208     -18.838  21.091  12.510  6.00  0.00           C  
ATOM   3333  C   CNT A 208     -19.423  23.832  11.710  4.00  0.00           C  
ATOM   3334  C   CNT A 208     -20.208  23.242  12.720  6.00  0.00           C  
ATOM   3335  C   CNT A 208     -19.903  21.889  13.110  5.00  0.00           C  
ATOM   3336  C   CNT A 208     -20.823  21.197  13.920  1.00  0.00           C  
ATOM   3337  C   CNT A 208     -21.336  23.899  13.260  1.00  0.00           C  
ATOM   3338  C   CNT A 208     -22.351  23.095  13.770  9.00  0.00           C  
ATOM   3339  C   CNT A 208     -22.093  21.772  14.180  3.00  0.00           C  
ATOM   3340  C   CNT A 208     -23.097  20.964  14.690  8.00  0.00           C  
ATOM   3341  C   CNT A 208     -22.859  19.679  15.100  0.00  0.00           C  
ATOM   3342  C   CNT A 208     -23.949  18.815  15.440  8.00  0.00           C  
ATOM   3343  C   CNT A 208     -23.649  17.484  15.760  9.00  0.00           C  
ATOM   3344  C   CNT A 208     -24.710  16.548  15.880  0.00  0.00           C  
ATOM   3345  C   CNT A 208     -25.229  19.146  15.100  9.00  0.00           C  
ATOM   3346  C   CNT A 208     -26.264  18.194  15.110  2.00  0.00           C  
ATOM   3347  C   CNT A 208     -26.038  16.912  15.540  8.00  0.00           C  
ATOM   3348  C   CNT A 208     -27.058  15.955  15.570  4.00  0.00           C  
ATOM   3349  C   CNT A 208     -27.518  18.568  14.670  2.00  0.00           C  
ATOM   3350  C   CNT A 208     -28.476  17.564  14.420  9.00  0.00           C  
ATOM   3351  C   CNT A 208     -28.314  16.284  14.920  4.00  0.00           C  
ATOM   3352  C   CNT A 208     -29.069  15.235  14.400  4.00  0.00           C  
ATOM   3353  C   CNT A 208     -29.515  17.807  13.540  9.00  0.00           C  
ATOM   3354  C   CNT A 208     -30.210  16.784  12.920  0.00  0.00           C  
ATOM   3355  C   CNT A 208     -29.922  15.462  13.320  5.00  0.00           C  
ATOM   3356  C   CNT A 208     -30.431  14.431  12.510  0.00  0.00           C  
ATOM   3357  C   CNT A 208     -31.031  17.028  11.840  7.00  0.00           C  
ATOM   3358  C   CNT A 208     -31.416  16.028  10.940  4.00  0.00           C  
ATOM   3359  C   CNT A 208     -31.163  14.691  11.320  5.00  0.00           C  
ATOM   3360  C   CNT A 208     -31.261  13.589  10.390  7.00  0.00           C  
ATOM   3361  C   CNT A 208     -31.718  16.254   9.600  0.00  0.00           C  
ATOM   3362  C   CNT A 208     -31.666  15.226   8.680  0.00  0.00           C  
ATOM   3363  C   CNT A 208     -31.374  13.923   9.050  8.00  0.00           C  
ATOM   3364  C   CNT A 208     -31.235  12.922   8.080  3.00  0.00           C  
ATOM   3365  C   CNT A 208     -31.710  15.527   7.350  0.00  0.00           C  
ATOM   3366  C   CNT A 208     -31.378  14.579   6.350  0.00  0.00           C  
ATOM   3367  C   CNT A 208     -31.205  13.234   6.720  1.00  0.00           C  
ATOM   3368  C   CNT A 208     -30.809  12.339   5.790  0.00  0.00           C  
ATOM   3369  C   CNT A 208     -31.208  15.022   5.030  9.00  0.00           C  
ATOM   3370  C   CNT A 208     -30.670  14.102   4.120  4.00  0.00           C  
ATOM   3371  C   CNT A 208     -30.385  12.746   4.500  8.00  0.00           C  
ATOM   3372  C   CNT A 208     -29.471  11.957   3.810  3.00  0.00           C  
ATOM   3373  C   CNT A 208     -30.035  14.625   2.960  6.00  0.00           C  
ATOM   3374  C   CNT A 208     -28.939  13.896   2.440  6.00  0.00           C  
ATOM   3375  C   CNT A 208     -28.624  12.600   2.870  6.00  0.00           C  
ATOM   3376  C   CNT A 208     -27.517  11.885   2.400  4.00  0.00           C  
ATOM   3377  C   CNT A 208     -28.072  14.578   1.530  9.00  0.00           C  
ATOM   3378  C   CNT A 208     -26.834  13.929   1.280  2.00  0.00           C  
ATOM   3379  C   CNT A 208     -26.552  12.642   1.690  3.00  0.00           C  
ATOM   3380  C   CNT A 208     -25.239  12.186   1.760  7.00  0.00           C  
ATOM   3381  C   CNT A 208     -25.816  14.757   0.730  6.00  0.00           C  
ATOM   3382  C   CNT A 208     -24.466  14.278   0.870  1.00  0.00           C  
ATOM   3383  C   CNT A 208     -24.238  13.018   1.390  9.00  0.00           C  
ATOM   3384  C   CNT A 208     -22.928  12.627   1.620  6.00  0.00           C  
ATOM   3385  C   CNT A 208     -23.413  15.240   0.740  3.00  0.00           C  
ATOM   3386  C   CNT A 208     -22.141  14.890   1.200  8.00  0.00           C  
ATOM   3387  C   CNT A 208     -21.890  13.600   1.710  0.00  0.00           C  
ATOM   3388  C   CNT A 208     -20.676  13.293   2.330  8.00  0.00           C  
ATOM   3389  C   CNT A 208     -21.176  15.902   1.410  4.00  0.00           C  
ATOM   3390  C   CNT A 208     -20.096  15.601   2.320  3.00  0.00           C  
ATOM   3391  C   CNT A 208     -19.815  14.281   2.630  5.00  0.00           C  
ATOM   3392  C   CNT A 208     -18.698  13.999   3.430  2.00  0.00           C  
ATOM   3393  C   CNT A 208     -19.269  16.663   2.670  0.00  0.00           C  
ATOM   3394  C   CNT A 208     -18.280  16.324   3.650  7.00  0.00           C  
ATOM   3395  C   CNT A 208     -17.978  15.045   4.010  5.00  0.00           C  
ATOM   3396  C   CNT A 208     -17.111  14.819   5.140  1.00  0.00           C  
ATOM   3397  C   CNT A 208     -17.652  17.383   4.350  4.00  0.00           C  
ATOM   3398  C   CNT A 208     -16.952  17.134   5.550  4.00  0.00           C  
ATOM   3399  C   CNT A 208     -16.663  15.847   5.920  7.00  0.00           C  
ATOM   3400  C   CNT A 208     -16.174  15.622   7.180  8.00  0.00           C  
ATOM   3401  C   CNT A 208     -16.745  18.238   6.450  0.00  0.00           C  
ATOM   3402  C   CNT A 208     -16.381  17.960   7.740  9.00  0.00           C  
ATOM   3403  C   CNT A 208     -16.096  16.672   8.130  8.00  0.00           C  
ATOM   3404  C   CNT A 208     -15.983  16.416   9.480  0.00  0.00           C  
ATOM   3405  C   CNT A 208     -16.593  19.021   8.720  1.00  0.00           C  
ATOM   3406  C   CNT A 208     -16.667  18.613  10.070  1.00  0.00           C  
ATOM   3407  C   CNT A 208     -16.292  17.325  10.480  1.00  0.00           C  
ATOM   3408  C   CNT A 208     -16.695  16.900  11.760  1.00  0.00           C  
ATOM   3409  C   CNT A 208     -17.233  19.532  10.990  3.00  0.00           C  
ATOM   3410  C   CNT A 208     -17.675  19.003  12.200  4.00  0.00           C  
ATOM   3411  C   CNT A 208     -17.458  17.716  12.580  9.00  0.00           C  
ATOM   3412  C   CNT A 208     -18.151  17.183  13.680  5.00  0.00           C  
ATOM   3413  C   CNT A 208     -18.621  19.775  12.890  3.00  0.00           C  
ATOM   3414  C   CNT A 208     -19.553  19.172  13.720  7.00  0.00           C  
ATOM   3415  C   CNT A 208     -19.261  17.875  14.160  3.00  0.00           C  
ATOM   3416  C   CNT A 208     -20.083  17.207  15.070  3.00  0.00           C  
ATOM   3417  C   CNT A 208     -20.609  19.864  14.270  1.00  0.00           C  
ATOM   3418  C   CNT A 208     -21.545  19.115  14.990  7.00  0.00           C  
ATOM   3419  C   CNT A 208     -21.279  17.846  15.440  8.00  0.00           C  
ATOM   3420  C   CNT A 208     -22.345  17.040  15.830  7.00  0.00           C  
ATOM   3421  C   CNT A 208     -22.038  15.772  16.320  0.00  0.00           C  
ATOM   3422  C   CNT A 208     -23.137  14.901  16.630  1.00  0.00           C  
ATOM   3423  C   CNT A 208     -22.904  13.602  17.200  2.00  0.00           C  
ATOM   3424  C   CNT A 208     -23.955  12.690  17.310  0.00  0.00           C  
ATOM   3425  C   CNT A 208     -24.437  15.297  16.450  1.00  0.00           C  
ATOM   3426  C   CNT A 208     -25.480  14.329  16.410  0.00  0.00           C  
ATOM   3427  C   CNT A 208     -25.200  13.017  16.770  4.00  0.00           C  
ATOM   3428  C   CNT A 208     -26.288  12.040  16.790  8.00  0.00           C  
ATOM   3429  C   CNT A 208     -26.806  14.653  15.970  0.00  0.00           C  
ATOM   3430  C   CNT A 208     -27.677  13.614  15.600  8.00  0.00           C  
ATOM   3431  C   CNT A 208     -27.399  12.284  15.960  8.00  0.00           C  
ATOM   3432  C   CNT A 208     -28.052  11.247  15.390  5.00  0.00           C  
ATOM   3433  C   CNT A 208     -28.743  13.889  14.750  7.00  0.00           C  
ATOM   3434  C   CNT A 208     -29.359  12.835  14.060  7.00  0.00           C  
ATOM   3435  C   CNT A 208     -29.010  11.503  14.400  8.00  0.00           C  
ATOM   3436  C   CNT A 208     -29.520  10.423  13.690  8.00  0.00           C  
ATOM   3437  C   CNT A 208     -30.051  13.161  12.870  3.00  0.00           C  
ATOM   3438  C   CNT A 208     -30.374  12.051  12.040  5.00  0.00           C  
ATOM   3439  C   CNT A 208     -30.067  10.688  12.390  4.00  0.00           C  
ATOM   3440  C   CNT A 208     -30.364   9.630  11.470  9.00  0.00           C  
ATOM   3441  C   CNT A 208     -30.876  12.309  10.760  6.00  0.00           C  
ATOM   3442  C   CNT A 208     -30.976  11.264   9.860  2.00  0.00           C  
ATOM   3443  C   CNT A 208     -30.759   9.962  10.200  9.00  0.00           C  
ATOM   3444  C   CNT A 208     -30.659   8.921   9.200  7.00  0.00           C  
ATOM   3445  C   CNT A 208     -31.197  11.547   8.490  2.00  0.00           C  
ATOM   3446  C   CNT A 208     -30.837  10.608   7.480  6.00  0.00           C  
ATOM   3447  C   CNT A 208     -30.508   9.283   7.840  0.00  0.00           C  
ATOM   3448  C   CNT A 208     -29.940   8.361   6.970  2.00  0.00           C  
ATOM   3449  C   CNT A 208     -30.573  11.007   6.120  2.00  0.00           C  
ATOM   3450  C   CNT A 208     -29.862  10.115   5.330  8.00  0.00           C  
ATOM   3451  C   CNT A 208     -29.497   8.813   5.750  5.00  0.00           C  
ATOM   3452  C   CNT A 208     -28.569   8.014   5.020  7.00  0.00           C  
ATOM   3453  C   CNT A 208     -29.219  10.625   4.200  0.00  0.00           C  
ATOM   3454  C   CNT A 208     -28.095   9.917   3.670  5.00  0.00           C  
ATOM   3455  C   CNT A 208     -27.782   8.640   4.080  8.00  0.00           C  
ATOM   3456  C   CNT A 208     -26.662   7.976   3.590  7.00  0.00           C  
ATOM   3457  C   CNT A 208     -27.200  10.628   2.910  5.00  0.00           C  
ATOM   3458  C   CNT A 208     -25.964  10.089   2.650  1.00  0.00           C  
ATOM   3459  C   CNT A 208     -25.695   8.755   2.940  3.00  0.00           C  
ATOM   3460  C   CNT A 208     -24.456   8.184   2.680  2.00  0.00           C  
ATOM   3461  C   CNT A 208     -24.972  10.875   2.090  2.00  0.00           C  
ATOM   3462  C   CNT A 208     -23.676  10.381   2.000  4.00  0.00           C  
ATOM   3463  C   CNT A 208     -23.382   9.024   2.370  9.00  0.00           C  
ATOM   3464  C   CNT A 208     -22.039   8.698   2.710  4.00  0.00           C  
ATOM   3465  C   CNT A 208     -22.605  11.306   1.980  7.00  0.00           C  
ATOM   3466  C   CNT A 208     -21.359  10.927   2.470  3.00  0.00           C  
ATOM   3467  C   CNT A 208     -21.024   9.626   2.830  6.00  0.00           C  
ATOM   3468  C   CNT A 208     -19.831   9.367   3.560  6.00  0.00           C  
ATOM   3469  C   CNT A 208     -20.427  11.936   2.670  4.00  0.00           C  
ATOM   3470  C   CNT A 208     -19.215  11.637   3.350  6.00  0.00           C  
ATOM   3471  C   CNT A 208     -18.879  10.326   3.750  8.00  0.00           C  
ATOM   3472  C   CNT A 208     -17.786  10.092   4.530  3.00  0.00           C  
ATOM   3473  C   CNT A 208     -18.418  12.664   3.830  6.00  0.00           C  
ATOM   3474  C   CNT A 208     -17.457  12.425   4.760  8.00  0.00           C  
ATOM   3475  C   CNT A 208     -17.078  11.081   5.110  4.00  0.00           C  
ATOM   3476  C   CNT A 208     -16.243  10.864   6.220  4.00  0.00           C  
ATOM   3477  C   CNT A 208     -16.865  13.475   5.500  0.00  0.00           C  
ATOM   3478  C   CNT A 208     -16.082  13.244   6.660  9.00  0.00           C  
ATOM   3479  C   CNT A 208     -15.779  11.954   7.000  5.00  0.00           C  
ATOM   3480  C   CNT A 208     -15.286  11.681   8.320  3.00  0.00           C  
ATOM   3481  C   CNT A 208     -15.820  14.297   7.540  4.00  0.00           C  
ATOM   3482  C   CNT A 208     -15.536  14.052   8.870  7.00  0.00           C  
ATOM   3483  C   CNT A 208     -15.204  12.751   9.210  7.00  0.00           C  
ATOM   3484  C   CNT A 208     -15.151  12.446  10.610  6.00  0.00           C  
ATOM   3485  C   CNT A 208     -15.780  15.048   9.830  4.00  0.00           C  
ATOM   3486  C   CNT A 208     -15.862  14.701  11.190  0.00  0.00           C  
ATOM   3487  C   CNT A 208     -15.718  13.374  11.550  5.00  0.00           C  
ATOM   3488  C   CNT A 208     -15.976  12.967  12.850  0.00  0.00           C  
ATOM   3489  C   CNT A 208     -16.390  15.576  12.140  2.00  0.00           C  
ATOM   3490  C   CNT A 208     -16.947  15.077  13.360  0.00  0.00           C  
ATOM   3491  C   CNT A 208     -16.727  13.736  13.720  8.00  0.00           C  
ATOM   3492  C   CNT A 208     -17.410  13.239  14.810  7.00  0.00           C  
ATOM   3493  C   CNT A 208     -17.858  15.873  14.080  6.00  0.00           C  
ATOM   3494  C   CNT A 208     -18.621  15.266  15.090  8.00  0.00           C  
ATOM   3495  C   CNT A 208     -18.496  13.906  15.410  2.00  0.00           C  
ATOM   3496  C   CNT A 208     -19.327  13.298  16.350  9.00  0.00           C  
ATOM   3497  C   CNT A 208     -19.779  15.886  15.510  0.00  0.00           C  
ATOM   3498  C   CNT A 208     -20.747  15.270  16.340  3.00  0.00           C  
ATOM   3499  C   CNT A 208     -20.528  13.921  16.800  2.00  0.00           C  
ATOM   3500  C   CNT A 208     -21.599  13.181  17.340  5.00  0.00           C  
ATOM   3501  C   CNT A 208     -21.352  11.859  17.740  9.00  0.00           C  
ATOM   3502  C   CNT A 208     -22.370  10.945  18.010  8.00  0.00           C  
ATOM   3503  C   CNT A 208     -22.074   9.633  18.430  0.00  0.00           C  
ATOM   3504  C   CNT A 208     -23.139   8.742  18.620  1.00  0.00           C  
ATOM   3505  C   CNT A 208     -23.706  11.342  17.740  2.00  0.00           C  
ATOM   3506  C   CNT A 208     -24.754  10.409  17.740  0.00  0.00           C  
ATOM   3507  C   CNT A 208     -24.380   9.074  18.080  1.00  0.00           C  
ATOM   3508  C   CNT A 208     -25.276   8.075  17.770  0.00  0.00           C  
ATOM   3509  C   CNT A 208     -25.972  10.754  17.150  4.00  0.00           C  
ATOM   3510  C   CNT A 208     -26.752   9.687  16.710  8.00  0.00           C  
ATOM   3511  C   CNT A 208     -26.383   8.394  17.040  0.00  0.00           C  
ATOM   3512  C   CNT A 208     -27.253   7.338  16.610  8.00  0.00           C  
ATOM   3513  C   CNT A 208     -27.710   9.908  15.700  3.00  0.00           C  
ATOM   3514  C   CNT A 208     -28.481   8.889  15.190  6.00  0.00           C  
ATOM   3515  C   CNT A 208     -28.204   7.563  15.580  4.00  0.00           C  
ATOM   3516  C   CNT A 208     -28.683   6.514  14.860  5.00  0.00           C  
ATOM   3517  C   CNT A 208     -29.304   9.109  14.050  8.00  0.00           C  
ATOM   3518  C   CNT A 208     -29.682   8.057  13.220  5.00  0.00           C  
ATOM   3519  C   CNT A 208     -29.341   6.750  13.660  7.00  0.00           C  
ATOM   3520  C   CNT A 208     -29.598   5.727  12.710  0.00  0.00           C  
ATOM   3521  C   CNT A 208     -30.119   8.344  11.890  3.00  0.00           C  
ATOM   3522  C   CNT A 208     -30.318   7.290  10.970  8.00  0.00           C  
ATOM   3523  C   CNT A 208     -29.947   5.991  11.400  4.00  0.00           C  
ATOM   3524  C   CNT A 208     -29.706   4.989  10.400  6.00  0.00           C  
ATOM   3525  C   CNT A 208     -30.421   7.592   9.610  0.00  0.00           C  
ATOM   3526  C   CNT A 208     -29.967   6.639   8.690  1.00  0.00           C  
ATOM   3527  C   CNT A 208     -29.617   5.296   9.050  8.00  0.00           C  
ATOM   3528  C   CNT A 208     -29.076   4.367   8.190  8.00  0.00           C  
ATOM   3529  C   CNT A 208     -29.614   7.073   7.440  6.00  0.00           C  
ATOM   3530  C   CNT A 208     -28.912   6.199   6.580  3.00  0.00           C  
ATOM   3531  C   CNT A 208     -28.683   4.840   6.940  3.00  0.00           C  
ATOM   3532  C   CNT A 208     -27.811   4.066   6.180  1.00  0.00           C  
ATOM   3533  C   CNT A 208     -28.424   6.691   5.380  5.00  0.00           C  
ATOM   3534  C   CNT A 208     -27.317   6.032   4.800  0.00  0.00           C  
ATOM   3535  C   CNT A 208     -27.024   4.700   5.190  6.00  0.00           C  
ATOM   3536  C   CNT A 208     -25.863   4.068   4.800  0.00  0.00           C  
ATOM   3537  C   CNT A 208     -26.425   6.676   3.920  3.00  0.00           C  
ATOM   3538  C   CNT A 208     -25.200   6.034   3.560  8.00  0.00           C  
ATOM   3539  C   CNT A 208     -24.885   4.755   4.070  6.00  0.00           C  
ATOM   3540  C   CNT A 208     -23.580   4.271   3.960  8.00  0.00           C  
ATOM   3541  C   CNT A 208     -24.173   6.853   3.090  8.00  0.00           C  
ATOM   3542  C   CNT A 208     -22.855   6.400   3.180  3.00  0.00           C  
ATOM   3543  C   CNT A 208     -22.514   5.157   3.600  5.00  0.00           C  
ATOM   3544  C   CNT A 208     -21.175   4.776   3.900  9.00  0.00           C  
ATOM   3545  C   CNT A 208     -21.848   7.351   3.080  2.00  0.00           C  
ATOM   3546  C   CNT A 208     -20.476   7.025   3.490  9.00  0.00           C  
ATOM   3547  C   CNT A 208     -20.170   5.714   3.870  8.00  0.00           C  
ATOM   3548  C   CNT A 208     -18.934   5.345   4.470  0.00  0.00           C  
ATOM   3549  C   CNT A 208     -19.628   8.041   3.980  5.00  0.00           C  
ATOM   3550  C   CNT A 208     -18.402   7.722   4.570  9.00  0.00           C  
ATOM   3551  C   CNT A 208     -18.063   6.413   4.900  1.00  0.00           C  
ATOM   3552  C   CNT A 208     -17.003   6.122   5.700  3.00  0.00           C  
ATOM   3553  C   CNT A 208     -17.528   8.744   4.950  7.00  0.00           C  
ATOM   3554  C   CNT A 208     -16.507   8.485   5.900  3.00  0.00           C  
ATOM   3555  C   CNT A 208     -16.243   7.152   6.290  9.00  0.00           C  
ATOM   3556  C   CNT A 208     -15.420   6.938   7.390  2.00  0.00           C  
ATOM   3557  C   CNT A 208     -15.969   9.523   6.590  3.00  0.00           C  
ATOM   3558  C   CNT A 208     -15.346   9.303   7.890  6.00  0.00           C  
ATOM   3559  C   CNT A 208     -15.155   7.992   8.240  5.00  0.00           C  
ATOM   3560  C   CNT A 208     -14.493   7.696   9.450  3.00  0.00           C  
ATOM   3561  C   CNT A 208     -15.018  10.386   8.710  5.00  0.00           C  
ATOM   3562  C   CNT A 208     -14.711  10.107  10.030  1.00  0.00           C  
ATOM   3563  C   CNT A 208     -14.478   8.784  10.400  5.00  0.00           C  
ATOM   3564  C   CNT A 208     -14.505   8.490  11.780  2.00  0.00           C  
ATOM   3565  C   CNT A 208     -14.848  11.124  10.990  0.00  0.00           C  
ATOM   3566  C   CNT A 208     -15.015  10.770  12.340  4.00  0.00           C  
ATOM   3567  C   CNT A 208     -14.881   9.436  12.700  6.00  0.00           C  
ATOM   3568  C   CNT A 208     -15.277   8.955  13.940  9.00  0.00           C  
ATOM   3569  C   CNT A 208     -15.754  11.602  13.180  6.00  0.00           C  
ATOM   3570  C   CNT A 208     -16.352  11.085  14.360  9.00  0.00           C  
ATOM   3571  C   CNT A 208     -15.970   9.816  14.810  6.00  0.00           C  
ATOM   3572  C   CNT A 208     -16.649   9.209  15.900  4.00  0.00           C  
ATOM   3573  C   CNT A 208     -17.154  11.859  15.190  5.00  0.00           C  
ATOM   3574  C   CNT A 208     -17.978  11.327  16.190  7.00  0.00           C  
ATOM   3575  C   CNT A 208     -17.738   9.955  16.480  0.00  0.00           C  
ATOM   3576  C   CNT A 208     -18.567   9.342  17.380  0.00  0.00           C  
ATOM   3577  C   CNT A 208     -19.126  11.975  16.730  3.00  0.00           C  
ATOM   3578  C   CNT A 208     -20.088  11.288  17.460  7.00  0.00           C  
ATOM   3579  C   CNT A 208     -19.765   9.957  17.710  9.00  0.00           C  
ATOM   3580  C   CNT A 208     -20.753   9.154  18.300  4.00  0.00           C  
ATOM   3581  C   CNT A 208     -20.482   7.818  18.640  7.00  0.00           C  
ATOM   3582  C   CNT A 208     -21.527   6.975  19.080  1.00  0.00           C  
ATOM   3583  C   CNT A 208     -21.229   5.678  19.460  2.00  0.00           C  
ATOM   3584  C   CNT A 208     -22.275   4.788  19.540  8.00  0.00           C  
ATOM   3585  C   CNT A 208     -22.886   7.443  19.010  0.00  0.00           C  
ATOM   3586  C   CNT A 208     -23.803   6.470  18.820  6.00  0.00           C  
ATOM   3587  C   CNT A 208     -23.526   5.125  19.090  8.00  0.00           C  
ATOM   3588  C   CNT A 208     -24.557   4.139  19.100  0.00  0.00           C  
ATOM   3589  C   CNT A 208     -25.050   6.767  18.240  7.00  0.00           C  
ATOM   3590  C   CNT A 208     -25.970   5.791  17.960  2.00  0.00           C  
ATOM   3591  C   CNT A 208     -25.692   4.470  18.390  9.00  0.00           C  
ATOM   3592  C   CNT A 208     -26.435   3.413  17.840  6.00  0.00           C  
ATOM   3593  C   CNT A 208     -26.965   6.001  17.010  6.00  0.00           C  
ATOM   3594  C   CNT A 208     -27.629   4.937  16.420  8.00  0.00           C  
ATOM   3595  C   CNT A 208     -27.375   3.609  16.850  1.00  0.00           C  
ATOM   3596  C   CNT A 208     -27.727   2.555  16.030  5.00  0.00           C  
ATOM   3597  C   CNT A 208     -28.424   5.161  15.290  3.00  0.00           C  
ATOM   3598  C   CNT A 208     -28.846   4.115  14.390  4.00  0.00           C  
ATOM   3599  C   CNT A 208     -28.530   2.805  14.900  1.00  0.00           C  
ATOM   3600  C   CNT A 208     -28.809   1.730  13.990  0.00  0.00           C  
ATOM   3601  C   CNT A 208     -29.449   4.339  13.120  7.00  0.00           C  
ATOM   3602  C   CNT A 208     -29.399   3.308  12.220  1.00  0.00           C  
ATOM   3603  C   CNT A 208     -29.122   1.996  12.680  4.00  0.00           C  
ATOM   3604  C   CNT A 208     -28.930   1.040  11.650  7.00  0.00           C  
ATOM   3605  C   CNT A 208     -29.541   3.629  10.850  0.00  0.00           C  
ATOM   3606  C   CNT A 208     -29.126   2.679   9.910  6.00  0.00           C  
ATOM   3607  C   CNT A 208     -28.752   1.417  10.300  1.00  0.00           C  
ATOM   3608  C   CNT A 208     -28.387   0.464   9.360  3.00  0.00           C  
ATOM   3609  C   CNT A 208     -28.745   3.048   8.600  3.00  0.00           C  
ATOM   3610  C   CNT A 208     -28.069   2.201   7.760  4.00  0.00           C  
ATOM   3611  C   CNT A 208     -27.856   0.865   8.130  0.00  0.00           C  
ATOM   3612  C   CNT A 208     -26.891   0.118   7.470  0.00  0.00           C  
ATOM   3613  C   CNT A 208     -27.502   2.799   6.600  7.00  0.00           C  
ATOM   3614  C   CNT A 208     -26.472   2.067   6.000  0.00  0.00           C  
ATOM   3615  C   CNT A 208     -26.163   0.757   6.440  7.00  0.00           C  
ATOM   3616  C   CNT A 208     -25.065   0.097   5.900  3.00  0.00           C  
ATOM   3617  C   CNT A 208     -25.555   2.763   5.120  5.00  0.00           C  
ATOM   3618  C   CNT A 208     -24.312   2.239   4.900  8.00  0.00           C  
ATOM   3619  C   CNT A 208     -24.072   0.929   5.290  2.00  0.00           C  
ATOM   3620  C   CNT A 208     -22.767   0.370   5.170  3.00  0.00           C  
ATOM   3621  C   CNT A 208     -23.253   2.935   4.300  6.00  0.00           C  
ATOM   3622  C   CNT A 208     -21.913   2.533   4.360  8.00  0.00           C  
ATOM   3623  C   CNT A 208     -21.664   1.212   4.850  8.00  0.00           C  
ATOM   3624  C   CNT A 208     -20.382   0.805   5.090  2.00  0.00           C  
ATOM   3625  C   CNT A 208     -20.871   3.457   4.210  7.00  0.00           C  
ATOM   3626  C   CNT A 208     -19.630   3.083   4.670  8.00  0.00           C  
ATOM   3627  C   CNT A 208     -19.408   1.756   5.100  0.00  0.00           C  
ATOM   3628  C   CNT A 208     -18.116   1.440   5.600  2.00  0.00           C  
ATOM   3629  C   CNT A 208     -18.661   4.040   4.880  4.00  0.00           C  
ATOM   3630  C   CNT A 208     -17.499   3.824   5.530  7.00  0.00           C  
ATOM   3631  C   CNT A 208     -17.247   2.480   5.960  3.00  0.00           C  
ATOM   3632  C   CNT A 208     -16.118   2.208   6.720  6.00  0.00           C  
ATOM   3633  C   CNT A 208     -16.647   4.839   6.080  0.00  0.00           C  
ATOM   3634  C   CNT A 208     -15.670   4.545   6.990  1.00  0.00           C  
ATOM   3635  C   CNT A 208     -15.496   3.280   7.380  2.00  0.00           C  
ATOM   3636  C   CNT A 208     -14.742   2.984   8.530  6.00  0.00           C  
ATOM   3637  C   CNT A 208     -15.150   5.598   7.790  9.00  0.00           C  
ATOM   3638  C   CNT A 208     -14.624   5.316   9.040  4.00  0.00           C  
ATOM   3639  C   CNT A 208     -14.327   4.012   9.380  3.00  0.00           C  
ATOM   3640  C   CNT A 208     -13.768   3.832  10.680  2.00  0.00           C  
ATOM   3641  C   CNT A 208     -14.364   6.402   9.870  7.00  0.00           C  
ATOM   3642  C   CNT A 208     -14.097   6.147  11.200  4.00  0.00           C  
ATOM   3643  C   CNT A 208     -13.809   4.858  11.610  6.00  0.00           C  
ATOM   3644  C   CNT A 208     -13.700   4.536  12.980  4.00  0.00           C  
ATOM   3645  C   CNT A 208     -14.297   7.163  12.170  0.00  0.00           C  
ATOM   3646  C   CNT A 208     -14.322   6.843  13.520  9.00  0.00           C  
ATOM   3647  C   CNT A 208     -14.078   5.501  13.930  3.00  0.00           C  
ATOM   3648  C   CNT A 208     -14.453   5.041  15.160  7.00  0.00           C  
ATOM   3649  C   CNT A 208     -14.965   7.675  14.390  4.00  0.00           C  
ATOM   3650  C   CNT A 208     -15.408   7.171  15.620  2.00  0.00           C  
ATOM   3651  C   CNT A 208     -15.246   5.832  15.970  2.00  0.00           C  
ATOM   3652  C   CNT A 208     -15.843   5.343  17.130  1.00  0.00           C  
ATOM   3653  C   CNT A 208     -16.400   7.908  16.290  0.00  0.00           C  
ATOM   3654  C   CNT A 208     -17.234   7.320  17.230  9.00  0.00           C  
ATOM   3655  C   CNT A 208     -16.911   5.977  17.720  1.00  0.00           C  
ATOM   3656  C   CNT A 208     -17.725   5.441  18.700  2.00  0.00           C  
ATOM   3657  C   CNT A 208     -18.248   8.037  17.790  4.00  0.00           C  
ATOM   3658  C   CNT A 208     -19.185   7.374  18.570  9.00  0.00           C  
ATOM   3659  C   CNT A 208     -18.844   6.123  19.110  4.00  0.00           C  
ATOM   3660  C   CNT A 208     -19.909   5.286  19.630  8.00  0.00           C  
ATOM   3661  C   CNT A 208     -19.672   3.920  19.940  5.00  0.00           C  
ATOM   3662  C   CNT A 208     -20.707   2.990  20.140  3.00  0.00           C  
ATOM   3663  C   CNT A 208     -20.476   1.728  20.640  3.00  0.00           C  
ATOM   3664  C   CNT A 208     -21.472   0.805  20.760  2.00  0.00           C  
ATOM   3665  C   CNT A 208     -22.005   3.460  19.910  8.00  0.00           C  
ATOM   3666  C   CNT A 208     -23.018   2.503  20.030  3.00  0.00           C  
ATOM   3667  C   CNT A 208     -22.783   1.180  20.480  3.00  0.00           C  
ATOM   3668  C   CNT A 208     -23.796   0.272  20.420  4.00  0.00           C  
ATOM   3669  C   CNT A 208     -24.324   2.849  19.530  3.00  0.00           C  
ATOM   3670  C   CNT A 208     -25.180   1.787  19.150  2.00  0.00           C  
ATOM   3671  C   CNT A 208     -24.947   0.482  19.670  4.00  0.00           C  
ATOM   3672  C   CNT A 208     -25.815  -0.541  19.170  3.00  0.00           C  
ATOM   3673  C   CNT A 208     -26.174   2.068  18.200  9.00  0.00           C  
ATOM   3674  C   CNT A 208     -26.908   0.993  17.670  8.00  0.00           C  
ATOM   3675  C   CNT A 208     -26.787  -0.311  18.180  5.00  0.00           C  
ATOM   3676  C   CNT A 208     -27.238  -1.362  17.360  7.00  0.00           C  
ATOM   3677  C   CNT A 208     -27.558   1.191  16.470  3.00  0.00           C  
ATOM   3678  C   CNT A 208     -28.041   0.173  15.660  5.00  0.00           C  
ATOM   3679  C   CNT A 208     -27.947  -1.143  16.110  8.00  0.00           C  
ATOM   3680  C   CNT A 208     -27.958  -2.169  15.160  9.00  0.00           C  
ATOM   3681  C   CNT A 208     -28.524   0.450  14.370  1.00  0.00           C  
ATOM   3682  C   CNT A 208     -28.507  -0.619  13.430  9.00  0.00           C  
ATOM   3683  C   CNT A 208     -28.274  -1.916  13.820  5.00  0.00           C  
ATOM   3684  C   CNT A 208     -28.147  -2.968  12.890  2.00  0.00           C  
ATOM   3685  C   CNT A 208     -28.599  -0.274  12.070  8.00  0.00           C  
ATOM   3686  C   CNT A 208     -28.263  -1.227  11.130  9.00  0.00           C  
ATOM   3687  C   CNT A 208     -28.061  -2.609  11.510  5.00  0.00           C  
ATOM   3688  C   CNT A 208     -27.412  -3.469  10.620  2.00  0.00           C  
ATOM   3689  C   CNT A 208     -28.062  -0.844   9.810  8.00  0.00           C  
ATOM   3690  C   CNT A 208     -27.283  -1.682   8.980  2.00  0.00           C  
ATOM   3691  C   CNT A 208     -27.049  -3.033   9.350  6.00  0.00           C  
ATOM   3692  C   CNT A 208     -26.109  -3.782   8.640  5.00  0.00           C  
ATOM   3693  C   CNT A 208     -26.646  -1.217   7.830  2.00  0.00           C  
ATOM   3694  C   CNT A 208     -25.602  -1.912   7.180  3.00  0.00           C  
ATOM   3695  C   CNT A 208     -25.347  -3.220   7.550  7.00  0.00           C  
ATOM   3696  C   CNT A 208     -24.168  -3.870   7.180  1.00  0.00           C  
ATOM   3697  C   CNT A 208     -24.802  -1.286   6.260  5.00  0.00           C  
ATOM   3698  C   CNT A 208     -23.555  -1.799   6.050  3.00  0.00           C  
ATOM   3699  C   CNT A 208     -23.231  -3.078   6.490  0.00  0.00           C  
ATOM   3700  C   CNT A 208     -21.935  -3.614   6.270  8.00  0.00           C  
ATOM   3701  C   CNT A 208     -22.482  -0.988   5.580  4.00  0.00           C  
ATOM   3702  C   CNT A 208     -21.152  -1.453   5.690  6.00  0.00           C  
ATOM   3703  C   CNT A 208     -20.881  -2.742   6.060  0.00  0.00           C  
ATOM   3704  C   CNT A 208     -19.577  -3.163   6.290  9.00  0.00           C  
ATOM   3705  C   CNT A 208     -20.104  -0.515   5.560  4.00  0.00           C  
ATOM   3706  C   CNT A 208     -18.824  -0.860   5.900  8.00  0.00           C  
ATOM   3707  C   CNT A 208     -18.602  -2.155   6.330  9.00  0.00           C  
ATOM   3708  C   CNT A 208     -17.336  -2.522   6.870  2.00  0.00           C  
ATOM   3709  C   CNT A 208     -17.856   0.120   6.010  9.00  0.00           C  
ATOM   3710  C   CNT A 208     -16.655  -0.205   6.660  1.00  0.00           C  
ATOM   3711  C   CNT A 208     -16.393  -1.508   7.090  6.00  0.00           C  
ATOM   3712  C   CNT A 208     -15.315  -1.745   7.950  8.00  0.00           C  
ATOM   3713  C   CNT A 208     -15.835   0.885   7.130  0.00  0.00           C  
ATOM   3714  C   CNT A 208     -14.948   0.619   8.200  9.00  0.00           C  
ATOM   3715  C   CNT A 208     -14.780  -0.671   8.700  3.00  0.00           C  
ATOM   3716  C   CNT A 208     -13.952  -0.907   9.750  4.00  0.00           C  
ATOM   3717  C   CNT A 208     -14.538   1.684   9.020  6.00  0.00           C  
ATOM   3718  C   CNT A 208     -13.797   1.407  10.140  8.00  0.00           C  
ATOM   3719  C   CNT A 208     -13.495   0.137  10.540  5.00  0.00           C  
ATOM   3720  C   CNT A 208     -13.065  -0.104  11.840  8.00  0.00           C  
ATOM   3721  C   CNT A 208     -13.487   2.518  11.040  2.00  0.00           C  
ATOM   3722  C   CNT A 208     -13.139   2.256  12.360  6.00  0.00           C  
ATOM   3723  C   CNT A 208     -12.906   0.955  12.770  1.00  0.00           C  
ATOM   3724  C   CNT A 208     -12.704   0.654  14.140  9.00  0.00           C  
ATOM   3725  C   CNT A 208     -13.408   3.226  13.340  2.00  0.00           C  
ATOM   3726  C   CNT A 208     -13.636   2.832  14.640  8.00  0.00           C  
ATOM   3727  C   CNT A 208     -13.297   1.550  15.060  7.00  0.00           C  
ATOM   3728  C   CNT A 208     -13.580   1.118  16.370  1.00  0.00           C  
ATOM   3729  C   CNT A 208     -14.176   3.727  15.550  9.00  0.00           C  
ATOM   3730  C   CNT A 208     -14.615   3.259  16.780  7.00  0.00           C  
ATOM   3731  C   CNT A 208     -14.331   1.957  17.200  4.00  0.00           C  
ATOM   3732  C   CNT A 208     -14.916   1.516  18.430  1.00  0.00           C  
ATOM   3733  C   CNT A 208     -15.528   4.037  17.560  9.00  0.00           C  
ATOM   3734  C   CNT A 208     -16.177   3.495  18.660  9.00  0.00           C  
ATOM   3735  C   CNT A 208     -15.925   2.209  19.080  3.00  0.00           C  
ATOM   3736  C   CNT A 208     -16.817   1.505  19.960  6.00  0.00           C  
ATOM   3737  C   CNT A 208     -17.480   4.044  19.010  1.00  0.00           C  
ATOM   3738  C   CNT A 208     -18.411   3.396  19.820  4.00  0.00           C  
ATOM   3739  C   CNT A 208     -18.097   2.114  20.200  0.00  0.00           C  
ATOM   3740  C   CNT A 208     -19.119   1.309  20.760  3.00  0.00           C  
ATOM   3741  C   CNT A 208     -18.908  -0.029  21.110  2.00  0.00           C  
ATOM   3742  C   CNT A 208     -19.912  -0.900  21.370  5.00  0.00           C  
ATOM   3743  C   CNT A 208     -19.620  -2.183  21.800  8.00  0.00           C  
ATOM   3744  C   CNT A 208     -20.639  -3.111  22.120  2.00  0.00           C  
ATOM   3745  C   CNT A 208     -21.246  -0.501  21.160  0.00  0.00           C  
ATOM   3746  C   CNT A 208     -22.274  -1.400  21.370  8.00  0.00           C  
ATOM   3747  C   CNT A 208     -21.880  -2.742  21.730  7.00  0.00           C  
ATOM   3748  C   CNT A 208     -22.828  -3.769  21.440  2.00  0.00           C  
ATOM   3749  C   CNT A 208     -23.473  -1.082  20.740  4.00  0.00           C  
ATOM   3750  C   CNT A 208     -24.392  -2.095  20.360  6.00  0.00           C  
ATOM   3751  C   CNT A 208     -24.039  -3.412  20.710  6.00  0.00           C  
ATOM   3752  C   CNT A 208     -24.842  -4.474  20.290  9.00  0.00           C  
ATOM   3753  C   CNT A 208     -25.417  -1.894  19.470  1.00  0.00           C  
ATOM   3754  C   CNT A 208     -26.122  -2.939  18.910  2.00  0.00           C  
ATOM   3755  C   CNT A 208     -25.799  -4.243  19.320  2.00  0.00           C  
ATOM   3756  C   CNT A 208     -26.353  -5.293  18.570  8.00  0.00           C  
ATOM   3757  C   CNT A 208     -27.003  -2.700  17.780  8.00  0.00           C  
ATOM   3758  C   CNT A 208     -27.268  -3.769  16.900  5.00  0.00           C  
ATOM   3759  C   CNT A 208     -27.026  -5.106  17.340  4.00  0.00           C  
ATOM   3760  C   CNT A 208     -27.265  -6.172  16.430  2.00  0.00           C  
ATOM   3761  C   CNT A 208     -27.712  -3.537  15.600  6.00  0.00           C  
ATOM   3762  C   CNT A 208     -27.742  -4.566  14.690  3.00  0.00           C  
ATOM   3763  C   CNT A 208     -27.472  -5.886  15.070  7.00  0.00           C  
ATOM   3764  C   CNT A 208     -27.181  -6.834  14.150  9.00  0.00           C  
ATOM   3765  C   CNT A 208     -27.887  -4.309  13.320  7.00  0.00           C  
ATOM   3766  C   CNT A 208     -27.352  -5.202  12.380  4.00  0.00           C  
ATOM   3767  C   CNT A 208     -27.030  -6.473  12.790  9.00  0.00           C  
ATOM   3768  C   CNT A 208     -26.449  -7.346  11.890  3.00  0.00           C  
ATOM   3769  C   CNT A 208     -27.041  -4.777  11.070  8.00  0.00           C  
ATOM   3770  C   CNT A 208     -26.385  -5.628  10.180  0.00  0.00           C  
ATOM   3771  C   CNT A 208     -26.066  -6.922  10.610  9.00  0.00           C  
ATOM   3772  C   CNT A 208     -25.170  -7.673   9.890  1.00  0.00           C  
ATOM   3773  C   CNT A 208     -25.798  -5.117   9.000  5.00  0.00           C  
ATOM   3774  C   CNT A 208     -24.693  -5.805   8.390  2.00  0.00           C  
ATOM   3775  C   CNT A 208     -24.412  -7.081   8.910  0.00  0.00           C  
ATOM   3776  C   CNT A 208     -23.376  -7.802   8.280  4.00  0.00           C  
ATOM   3777  C   CNT A 208     -23.916  -5.218   7.420  0.00  0.00           C  
ATOM   3778  C   CNT A 208     -22.709  -5.738   7.090  7.00  0.00           C  
ATOM   3779  C   CNT A 208     -22.400  -7.053   7.590  2.00  0.00           C  
ATOM   3780  C   CNT A 208     -21.085  -7.553   7.490  6.00  0.00           C  
ATOM   3781  C   CNT A 208     -21.650  -4.899   6.680  1.00  0.00           C  
ATOM   3782  C   CNT A 208     -20.339  -5.375   6.820  2.00  0.00           C  
ATOM   3783  C   CNT A 208     -20.052  -6.653   7.230  4.00  0.00           C  
ATOM   3784  C   CNT A 208     -18.726  -7.080   7.440  8.00  0.00           C  
ATOM   3785  C   CNT A 208     -19.259  -4.490   6.580  6.00  0.00           C  
ATOM   3786  C   CNT A 208     -17.938  -4.863   6.940  4.00  0.00           C  
ATOM   3787  C   CNT A 208     -17.701  -6.171   7.380  9.00  0.00           C  
ATOM   3788  C   CNT A 208     -16.513  -6.441   8.040  9.00  0.00           C  
ATOM   3789  C   CNT A 208     -17.066  -3.827   7.250  3.00  0.00           C  
ATOM   3790  C   CNT A 208     -15.978  -4.068   8.000  7.00  0.00           C  
ATOM   3791  C   CNT A 208     -15.651  -5.409   8.380  4.00  0.00           C  
ATOM   3792  C   CNT A 208     -14.562  -5.628   9.220  0.00  0.00           C  
ATOM   3793  C   CNT A 208     -15.119  -3.038   8.420  9.00  0.00           C  
ATOM   3794  C   CNT A 208     -14.160  -3.269   9.440  4.00  0.00           C  
ATOM   3795  C   CNT A 208     -13.907  -4.585   9.840  9.00  0.00           C  
ATOM   3796  C   CNT A 208     -13.100  -4.851  10.970  7.00  0.00           C  
ATOM   3797  C   CNT A 208     -13.665  -2.208  10.160  4.00  0.00           C  
ATOM   3798  C   CNT A 208     -13.170  -2.483  11.450  6.00  0.00           C  
ATOM   3799  C   CNT A 208     -12.903  -3.783  11.860  7.00  0.00           C  
ATOM   3800  C   CNT A 208     -12.410  -4.042  13.150  0.00  0.00           C  
ATOM   3801  C   CNT A 208     -12.843  -1.391  12.290  9.00  0.00           C  
ATOM   3802  C   CNT A 208     -12.521  -1.724  13.630  7.00  0.00           C  
ATOM   3803  C   CNT A 208     -12.361  -3.042  14.130  9.00  0.00           C  
ATOM   3804  C   CNT A 208     -11.999  -3.352  15.450  5.00  0.00           C  
ATOM   3805  C   CNT A 208     -12.550  -0.691  14.550  7.00  0.00           C  
ATOM   3806  C   CNT A 208     -12.548  -1.025  15.890  5.00  0.00           C  
ATOM   3807  C   CNT A 208     -12.298  -2.353  16.360  5.00  0.00           C  
ATOM   3808  C   CNT A 208     -12.581  -2.781  17.670  2.00  0.00           C  
ATOM   3809  C   CNT A 208     -13.092  -0.135  16.840  6.00  0.00           C  
ATOM   3810  C   CNT A 208     -13.671  -0.591  18.090  0.00  0.00           C  
ATOM   3811  C   CNT A 208     -13.307  -1.930  18.530  2.00  0.00           C  
ATOM   3812  C   CNT A 208     -13.943  -2.439  19.630  0.00  0.00           C  
ATOM   3813  C   CNT A 208     -14.698   0.124  18.800  1.00  0.00           C  
ATOM   3814  C   CNT A 208     -15.426  -0.464  19.840  4.00  0.00           C  
ATOM   3815  C   CNT A 208     -15.076  -1.729  20.200  6.00  0.00           C  
ATOM   3816  C   CNT A 208     -16.091  -2.559  20.780  4.00  0.00           C  
ATOM   3817  C   CNT A 208     -16.615   0.147  20.320  0.00  0.00           C  
ATOM   3818  C   CNT A 208     -17.593  -0.531  20.980  1.00  0.00           C  
ATOM   3819  C   CNT A 208     -17.338  -1.925  21.230  2.00  0.00           C  
ATOM   3820  C   CNT A 208     -18.317  -2.708  21.770  5.00  0.00           C  
ATOM   3821  C   CNT A 208     -18.027  -3.983  22.230  0.00  0.00           C  
ATOM   3822  C   CNT A 208     -19.078  -4.819  22.720  1.00  0.00           C  
ATOM   3823  C   CNT A 208     -18.795  -6.146  23.020  0.00  0.00           C  
ATOM   3824  C   CNT A 208     -19.847  -7.094  23.130  1.00  0.00           C  
ATOM   3825  C   CNT A 208     -20.428  -4.421  22.490  3.00  0.00           C  
ATOM   3826  C   CNT A 208     -21.417  -5.378  22.480  7.00  0.00           C  
ATOM   3827  C   CNT A 208     -21.132  -6.738  22.750  4.00  0.00           C  
ATOM   3828  C   CNT A 208     -22.075  -7.741  22.580  2.00  0.00           C  
ATOM   3829  C   CNT A 208     -22.636  -5.082  21.840  8.00  0.00           C  
ATOM   3830  C   CNT A 208     -23.575  -6.070  21.620  6.00  0.00           C  
ATOM   3831  C   CNT A 208     -23.215  -7.438  21.830  1.00  0.00           C  
ATOM   3832  C   CNT A 208     -24.015  -8.458  21.370  6.00  0.00           C  
ATOM   3833  C   CNT A 208     -24.539  -5.798  20.670  3.00  0.00           C  
ATOM   3834  C   CNT A 208     -25.166  -6.863  19.990  7.00  0.00           C  
ATOM   3835  C   CNT A 208     -24.908  -8.197  20.350  0.00  0.00           C  
ATOM   3836  C   CNT A 208     -25.534  -9.262  19.680  0.00  0.00           C  
ATOM   3837  C   CNT A 208     -26.029  -6.633  18.900  7.00  0.00           C  
ATOM   3838  C   CNT A 208     -26.402  -7.720  18.090  7.00  0.00           C  
ATOM   3839  C   CNT A 208     -26.175  -9.028  18.470  9.00  0.00           C  
ATOM   3840  C   CNT A 208     -26.256 -10.113  17.620  5.00  0.00           C  
ATOM   3841  C   CNT A 208     -26.948  -7.456  16.840  7.00  0.00           C  
ATOM   3842  C   CNT A 208     -26.909  -8.495  15.930  9.00  0.00           C  
ATOM   3843  C   CNT A 208     -26.689  -9.812  16.320  1.00  0.00           C  
ATOM   3844  C   CNT A 208     -26.533 -10.801  15.310  0.00  0.00           C  
ATOM   3845  C   CNT A 208     -26.853  -8.136  14.590  2.00  0.00           C  
ATOM   3846  C   CNT A 208     -26.617  -9.093  13.580  2.00  0.00           C  
ATOM   3847  C   CNT A 208     -26.414 -10.373  13.970  7.00  0.00           C  
ATOM   3848  C   CNT A 208     -25.906 -11.341  13.050  3.00  0.00           C  
ATOM   3849  C   CNT A 208     -26.301  -8.675  12.320  1.00  0.00           C  
ATOM   3850  C   CNT A 208     -25.556  -9.520  11.480  8.00  0.00           C  
ATOM   3851  C   CNT A 208     -25.319 -10.830  11.880  3.00  0.00           C  
ATOM   3852  C   CNT A 208     -24.416 -11.625  11.150  7.00  0.00           C  
ATOM   3853  C   CNT A 208     -24.948  -9.027  10.290  5.00  0.00           C  
ATOM   3854  C   CNT A 208     -23.957  -9.794   9.600  1.00  0.00           C  
ATOM   3855  C   CNT A 208     -23.699 -11.078  10.070  2.00  0.00           C  
ATOM   3856  C   CNT A 208     -22.595 -11.747   9.520  4.00  0.00           C  
ATOM   3857  C   CNT A 208     -23.151  -9.108   8.720  2.00  0.00           C  
ATOM   3858  C   CNT A 208     -21.849  -9.679   8.450  4.00  0.00           C  
ATOM   3859  C   CNT A 208     -21.571 -10.980   8.910  0.00  0.00           C  
ATOM   3860  C   CNT A 208     -20.278 -11.475   8.810  7.00  0.00           C  
ATOM   3861  C   CNT A 208     -20.811  -8.863   7.890  5.00  0.00           C  
ATOM   3862  C   CNT A 208     -19.510  -9.321   7.990  9.00  0.00           C  
ATOM   3863  C   CNT A 208     -19.243 -10.594   8.400  3.00  0.00           C  
ATOM   3864  C   CNT A 208     -17.967 -10.967   8.730  5.00  0.00           C  
ATOM   3865  C   CNT A 208     -18.478  -8.369   7.900  2.00  0.00           C  
ATOM   3866  C   CNT A 208     -17.189  -8.722   8.310  3.00  0.00           C  
ATOM   3867  C   CNT A 208     -16.957 -10.024   8.770  5.00  0.00           C  
ATOM   3868  C   CNT A 208     -15.699 -10.325   9.290  1.00  0.00           C  
ATOM   3869  C   CNT A 208     -16.195  -7.728   8.330  5.00  0.00           C  
ATOM   3870  C   CNT A 208     -14.983  -7.983   8.990  3.00  0.00           C  
ATOM   3871  C   CNT A 208     -14.760  -9.264   9.470  1.00  0.00           C  
ATOM   3872  C   CNT A 208     -13.790  -9.578  10.470  1.00  0.00           C  
ATOM   3873  C   CNT A 208     -14.291  -6.931   9.600  6.00  0.00           C  
ATOM   3874  C   CNT A 208     -13.362  -7.220  10.610  2.00  0.00           C  
ATOM   3875  C   CNT A 208     -12.998  -8.536  10.990  9.00  0.00           C  
ATOM   3876  C   CNT A 208     -12.222  -8.773  12.140  8.00  0.00           C  
ATOM   3877  C   CNT A 208     -12.769  -6.182  11.340  4.00  0.00           C  
ATOM   3878  C   CNT A 208     -12.160  -6.461  12.560  5.00  0.00           C  
ATOM   3879  C   CNT A 208     -11.864  -7.748  12.970  8.00  0.00           C  
ATOM   3880  C   CNT A 208     -11.456  -8.053  14.280  5.00  0.00           C  
ATOM   3881  C   CNT A 208     -12.051  -5.391  13.460  7.00  0.00           C  
ATOM   3882  C   CNT A 208     -11.752  -5.688  14.820  5.00  0.00           C  
ATOM   3883  C   CNT A 208     -11.455  -7.012  15.220  2.00  0.00           C  
ATOM   3884  C   CNT A 208     -11.349  -7.334  16.550  7.00  0.00           C  
ATOM   3885  C   CNT A 208     -11.720  -4.666  15.850  6.00  0.00           C  
ATOM   3886  C   CNT A 208     -11.651  -5.036  17.230  3.00  0.00           C  
ATOM   3887  C   CNT A 208     -11.534  -6.370  17.530  8.00  0.00           C  
ATOM   3888  C   CNT A 208     -11.863  -6.729  18.850  4.00  0.00           C  
ATOM   3889  C   CNT A 208     -12.340  -4.117  18.060  2.00  0.00           C  
ATOM   3890  C   CNT A 208     -12.770  -4.503  19.340  3.00  0.00           C  
ATOM   3891  C   CNT A 208     -12.563  -5.873  19.720  6.00  0.00           C  
ATOM   3892  C   CNT A 208     -13.237  -6.381  20.810  6.00  0.00           C  
ATOM   3893  C   CNT A 208     -13.698  -3.709  20.050  3.00  0.00           C  
ATOM   3894  C   CNT A 208     -14.551  -4.394  20.960  1.00  0.00           C  
ATOM   3895  C   CNT A 208     -14.363  -5.700  21.300  0.00  0.00           C  
ATOM   3896  C   CNT A 208     -15.237  -6.416  22.140  9.00  0.00           C  
ATOM   3897  C   CNT A 208     -15.792  -3.809  21.270  3.00  0.00           C  
ATOM   3898  C   CNT A 208     -16.734  -4.516  22.120  3.00  0.00           C  
ATOM   3899  C   CNT A 208     -16.448  -5.825  22.530  7.00  0.00           C  
ATOM   3900  C   CNT A 208     -17.473  -6.621  22.990  8.00  0.00           C  
ATOM   3901  C   CNT A 208     -17.197  -7.936  23.390  3.00  0.00           C  
ATOM   3902  C   CNT A 208     -18.235  -8.830  23.670  4.00  0.00           C  
ATOM   3903  C   CNT A 208     -17.980 -10.162  24.140  5.00  0.00           C  
ATOM   3904  C   CNT A 208     -19.045 -11.048  24.340  3.00  0.00           C  
ATOM   3905  C   CNT A 208     -19.544  -8.406  23.440  9.00  0.00           C  
ATOM   3906  C   CNT A 208     -20.577  -9.338  23.580  5.00  0.00           C  
ATOM   3907  C   CNT A 208     -20.304 -10.664  23.930  7.00  0.00           C  
ATOM   3908  C   CNT A 208     -21.351 -11.615  23.830  5.00  0.00           C  
ATOM   3909  C   CNT A 208     -21.866  -9.028  23.070  5.00  0.00           C  
ATOM   3910  C   CNT A 208     -22.805 -10.000  22.770  1.00  0.00           C  
ATOM   3911  C   CNT A 208     -22.520 -11.323  23.110  5.00  0.00           C  
ATOM   3912  C   CNT A 208     -23.332 -12.446  22.570  8.00  0.00           C  
ATOM   3913  C   CNT A 208     -23.833  -9.763  21.820  7.00  0.00           C  
ATOM   3914  C   CNT A 208     -24.482 -10.851  21.230  1.00  0.00           C  
ATOM   3915  C   CNT A 208     -24.217 -12.163  21.550  9.00  0.00           C  
ATOM   3916  C   CNT A 208     -24.640 -13.215  20.800  8.00  0.00           C  
ATOM   3917  C   CNT A 208     -25.250 -10.573  20.050  8.00  0.00           C  
ATOM   3918  C   CNT A 208     -25.641 -11.672  19.300  7.00  0.00           C  
ATOM   3919  C   CNT A 208     -25.265 -12.942  19.610  1.00  0.00           C  
ATOM   3920  C   CNT A 208     -25.573 -14.017  18.760  0.00  0.00           C  
ATOM   3921  C   CNT A 208     -26.135 -11.447  18.020  3.00  0.00           C  
ATOM   3922  C   CNT A 208     -26.287 -12.426  17.050  1.00  0.00           C  
ATOM   3923  C   CNT A 208     -25.997 -13.728  17.410  8.00  0.00           C  
ATOM   3924  C   CNT A 208     -25.750 -14.729  16.470  2.00  0.00           C  
ATOM   3925  C   CNT A 208     -26.280 -12.083  15.670  4.00  0.00           C  
ATOM   3926  C   CNT A 208     -26.013 -13.078  14.710  3.00  0.00           C  
ATOM   3927  C   CNT A 208     -25.703 -14.367  15.140  2.00  0.00           C  
ATOM   3928  C   CNT A 208     -25.125 -15.235  14.230  4.00  0.00           C  
ATOM   3929  C   CNT A 208     -25.658 -12.656  13.390  7.00  0.00           C  
ATOM   3930  C   CNT A 208     -24.755 -13.429  12.670  9.00  0.00           C  
ATOM   3931  C   CNT A 208     -24.596 -14.758  12.960  8.00  0.00           C  
ATOM   3932  C   CNT A 208     -23.742 -15.573  12.190  6.00  0.00           C  
ATOM   3933  C   CNT A 208     -24.169 -12.963  11.510  3.00  0.00           C  
ATOM   3934  C   CNT A 208     -23.168 -13.671  10.870  2.00  0.00           C  
ATOM   3935  C   CNT A 208     -22.927 -15.005  11.250  1.00  0.00           C  
ATOM   3936  C   CNT A 208     -21.738 -15.597  10.820  1.00  0.00           C  
ATOM   3937  C   CNT A 208     -22.290 -13.031   9.990  7.00  0.00           C  
ATOM   3938  C   CNT A 208     -21.067 -13.567   9.720  1.00  0.00           C  
ATOM   3939  C   CNT A 208     -20.774 -14.898  10.070  7.00  0.00           C  
ATOM   3940  C   CNT A 208     -19.460 -15.415  10.010  4.00  0.00           C  
ATOM   3941  C   CNT A 208     -19.986 -12.737   9.360  0.00  0.00           C  
ATOM   3942  C   CNT A 208     -18.664 -13.172   9.360  4.00  0.00           C  
ATOM   3943  C   CNT A 208     -18.413 -14.569   9.720  4.00  0.00           C  
ATOM   3944  C   CNT A 208     -17.085 -14.979   9.850  9.00  0.00           C  
ATOM   3945  C   CNT A 208     -17.691 -12.282   9.140  8.00  0.00           C  
ATOM   3946  C   CNT A 208     -16.350 -12.682   9.450  6.00  0.00           C  
ATOM   3947  C   CNT A 208     -16.049 -13.992   9.800  5.00  0.00           C  
ATOM   3948  C   CNT A 208     -14.821 -14.287  10.400  5.00  0.00           C  
ATOM   3949  C   CNT A 208     -15.446 -11.658   9.660  9.00  0.00           C  
ATOM   3950  C   CNT A 208     -14.292 -11.920  10.410  6.00  0.00           C  
ATOM   3951  C   CNT A 208     -14.011 -13.229  10.860  6.00  0.00           C  
ATOM   3952  C   CNT A 208     -12.882 -13.488  11.660  2.00  0.00           C  
ATOM   3953  C   CNT A 208     -13.488 -10.888  10.890  2.00  0.00           C  
ATOM   3954  C   CNT A 208     -12.470 -11.181  11.770  0.00  0.00           C  
ATOM   3955  C   CNT A 208     -12.267 -12.434  12.270  1.00  0.00           C  
ATOM   3956  C   CNT A 208     -11.442 -12.735  13.340  5.00  0.00           C  
ATOM   3957  C   CNT A 208     -11.932 -10.104  12.460  8.00  0.00           C  
ATOM   3958  C   CNT A 208     -11.272 -10.362  13.750  0.00  0.00           C  
ATOM   3959  C   CNT A 208     -11.040 -11.692  14.160  5.00  0.00           C  
ATOM   3960  C   CNT A 208     -10.583 -11.927  15.460  2.00  0.00           C  
ATOM   3961  C   CNT A 208     -11.101  -9.310  14.670  6.00  0.00           C  
ATOM   3962  C   CNT A 208     -10.927  -9.590  16.000  4.00  0.00           C  
ATOM   3963  C   CNT A 208     -10.690 -10.891  16.410  7.00  0.00           C  
ATOM   3964  C   CNT A 208     -10.425 -11.171  17.720  8.00  0.00           C  
ATOM   3965  C   CNT A 208     -11.086  -8.633  16.960  6.00  0.00           C  
ATOM   3966  C   CNT A 208     -10.956  -8.921  18.350  8.00  0.00           C  
ATOM   3967  C   CNT A 208     -10.660 -10.211  18.770  3.00  0.00           C  
ATOM   3968  C   CNT A 208     -10.863 -10.601  20.070  7.00  0.00           C  
ATOM   3969  C   CNT A 208     -11.624  -8.046  19.250  4.00  0.00           C  
ATOM   3970  C   CNT A 208     -12.015  -8.443  20.490  8.00  0.00           C  
ATOM   3971  C   CNT A 208     -11.704  -9.761  20.860  7.00  0.00           C  
ATOM   3972  C   CNT A 208     -12.422 -10.383  21.930  8.00  0.00           C  
ATOM   3973  C   CNT A 208     -13.021  -7.729  21.120  5.00  0.00           C  
ATOM   3974  C   CNT A 208     -13.766  -8.368  22.080  9.00  0.00           C  
ATOM   3975  C   CNT A 208     -13.586  -9.717  22.400  6.00  0.00           C  
ATOM   3976  C   CNT A 208     -14.453 -10.392  23.270  7.00  0.00           C  
ATOM   3977  C   CNT A 208     -14.957  -7.725  22.500  1.00  0.00           C  
ATOM   3978  C   CNT A 208     -15.893  -8.477  23.200  1.00  0.00           C  
ATOM   3979  C   CNT A 208     -15.647  -9.821  23.590  9.00  0.00           C  
ATOM   3980  C   CNT A 208     -16.646 -10.568  24.200  8.00  0.00           C  
ATOM   3981  C   CNT A 208     -16.411 -11.943  24.500  5.00  0.00           C  
ATOM   3982  C   CNT A 208     -17.481 -12.794  24.860  1.00  0.00           C  
ATOM   3983  C   CNT A 208     -17.218 -14.087  25.360  7.00  0.00           C  
ATOM   3984  C   CNT A 208     -18.303 -14.978  25.540  3.00  0.00           C  
ATOM   3985  C   CNT A 208     -18.794 -12.336  24.710  7.00  0.00           C  
ATOM   3986  C   CNT A 208     -19.825 -13.288  24.720  6.00  0.00           C  
ATOM   3987  C   CNT A 208     -19.532 -14.592  25.020  0.00  0.00           C  
ATOM   3988  C   CNT A 208     -20.531 -15.567  24.910  9.00  0.00           C  
ATOM   3989  C   CNT A 208     -21.069 -12.917  24.170  0.00  0.00           C  
ATOM   3990  C   CNT A 208     -21.938 -13.972  23.890  8.00  0.00           C  
ATOM   3991  C   CNT A 208     -21.730 -15.268  24.280  9.00  0.00           C  
ATOM   3992  C   CNT A 208     -22.604 -16.321  23.820  3.00  0.00           C  
ATOM   3993  C   CNT A 208     -22.982 -13.734  23.020  9.00  0.00           C  
ATOM   3994  C   CNT A 208     -23.691 -14.759  22.360  2.00  0.00           C  
ATOM   3995  C   CNT A 208     -23.488 -16.082  22.800  5.00  0.00           C  
ATOM   3996  C   CNT A 208     -24.042 -17.199  22.070  8.00  0.00           C  
ATOM   3997  C   CNT A 208     -24.452 -14.519  21.210  2.00  0.00           C  
ATOM   3998  C   CNT A 208     -24.863 -15.605  20.420  8.00  0.00           C  
ATOM   3999  C   CNT A 208     -24.719 -16.931  20.860  3.00  0.00           C  
ATOM   4000  C   CNT A 208     -24.931 -17.997  19.960  7.00  0.00           C  
ATOM   4001  C   CNT A 208     -25.316 -15.335  19.150  0.00  0.00           C  
ATOM   4002  C   CNT A 208     -25.338 -16.377  18.230  1.00  0.00           C  
ATOM   4003  C   CNT A 208     -25.145 -17.716  18.640  8.00  0.00           C  
ATOM   4004  C   CNT A 208     -24.849 -18.652  17.680  1.00  0.00           C  
ATOM   4005  C   CNT A 208     -25.516 -16.045  16.850  9.00  0.00           C  
ATOM   4006  C   CNT A 208     -25.112 -16.959  15.880  6.00  0.00           C  
ATOM   4007  C   CNT A 208     -24.804 -18.260  16.300  1.00  0.00           C  
ATOM   4008  C   CNT A 208     -24.195 -19.161  15.380  6.00  0.00           C  
ATOM   4009  C   CNT A 208     -24.808 -16.530  14.630  4.00  0.00           C  
ATOM   4010  C   CNT A 208     -23.989 -17.346  13.800  2.00  0.00           C  
ATOM   4011  C   CNT A 208     -23.685 -18.618  14.180  7.00  0.00           C  
ATOM   4012  C   CNT A 208     -22.876 -19.483  13.440  7.00  0.00           C  
ATOM   4013  C   CNT A 208     -23.362 -16.834  12.670  9.00  0.00           C  
ATOM   4014  C   CNT A 208     -22.365 -17.576  12.050  2.00  0.00           C  
ATOM   4015  C   CNT A 208     -22.029 -18.878  12.460  6.00  0.00           C  
ATOM   4016  C   CNT A 208     -20.964 -19.593  11.890  7.00  0.00           C  
ATOM   4017  C   CNT A 208     -21.462 -16.896  11.220  9.00  0.00           C  
ATOM   4018  C   CNT A 208     -20.205 -17.519  10.900  0.00  0.00           C  
ATOM   4019  C   CNT A 208     -19.984 -18.866  11.300  6.00  0.00           C  
ATOM   4020  C   CNT A 208     -18.659 -19.405  11.180  8.00  0.00           C  
ATOM   4021  C   CNT A 208     -19.144 -16.751  10.450  0.00  0.00           C  
ATOM   4022  C   CNT A 208     -17.807 -17.151  10.610  8.00  0.00           C  
ATOM   4023  C   CNT A 208     -17.602 -18.499  10.920  2.00  0.00           C  
ATOM   4024  C   CNT A 208     -16.237 -18.875  11.090  3.00  0.00           C  
ATOM   4025  C   CNT A 208     -16.756 -16.289  10.260  8.00  0.00           C  
ATOM   4026  C   CNT A 208     -15.444 -16.670  10.540  3.00  0.00           C  
ATOM   4027  C   CNT A 208     -15.175 -17.941  10.980  4.00  0.00           C  
ATOM   4028  C   CNT A 208     -13.941 -18.210  11.510  1.00  0.00           C  
ATOM   4029  C   CNT A 208     -14.576 -15.587  10.770  8.00  0.00           C  
ATOM   4030  C   CNT A 208     -13.375 -15.906  11.460  0.00  0.00           C  
ATOM   4031  C   CNT A 208     -13.049 -17.199  11.890  6.00  0.00           C  
ATOM   4032  C   CNT A 208     -12.066 -17.525  12.830  7.00  0.00           C  
ATOM   4033  C   CNT A 208     -12.597 -14.835  11.970  4.00  0.00           C  
ATOM   4034  C   CNT A 208     -11.596 -15.120  12.990  3.00  0.00           C  
ATOM   4035  C   CNT A 208     -11.511 -16.412  13.500  6.00  0.00           C  
ATOM   4036  C   CNT A 208     -10.709 -16.637  14.630  3.00  0.00           C  
ATOM   4037  C   CNT A 208     -11.059 -14.070  13.720  4.00  0.00           C  
ATOM   4038  C   CNT A 208     -10.475 -14.302  14.920  6.00  0.00           C  
ATOM   4039  C   CNT A 208     -10.320 -15.586  15.440  7.00  0.00           C  
ATOM   4040  C   CNT A 208      -9.720 -15.854  16.690  3.00  0.00           C  
ATOM   4041  C   CNT A 208     -10.338 -13.226  15.850  8.00  0.00           C  
ATOM   4042  C   CNT A 208      -9.941 -13.514  17.210  8.00  0.00           C  
ATOM   4043  C   CNT A 208      -9.609 -14.829  17.580  8.00  0.00           C  
ATOM   4044  C   CNT A 208      -9.316 -15.067  18.950  5.00  0.00           C  
ATOM   4045  C   CNT A 208     -10.038 -12.505  18.140  6.00  0.00           C  
ATOM   4046  C   CNT A 208     -10.127 -12.864  19.540  2.00  0.00           C  
ATOM   4047  C   CNT A 208      -9.784 -14.173  19.910  2.00  0.00           C  
ATOM   4048  C   CNT A 208     -10.140 -14.654  21.210  8.00  0.00           C  
ATOM   4049  C   CNT A 208     -10.618 -11.919  20.520  9.00  0.00           C  
ATOM   4050  C   CNT A 208     -11.269 -12.449  21.670  1.00  0.00           C  
ATOM   4051  C   CNT A 208     -10.934 -13.772  22.040  6.00  0.00           C  
ATOM   4052  C   CNT A 208     -11.650 -14.356  23.120  5.00  0.00           C  
ATOM   4053  C   CNT A 208     -12.215 -11.680  22.350  9.00  0.00           C  
ATOM   4054  C   CNT A 208     -13.043 -12.377  23.260  2.00  0.00           C  
ATOM   4055  C   CNT A 208     -12.734 -13.693  23.670  6.00  0.00           C  
ATOM   4056  C   CNT A 208     -13.605 -14.357  24.520  2.00  0.00           C  
ATOM   4057  C   CNT A 208     -14.207 -11.737  23.650  6.00  0.00           C  
ATOM   4058  C   CNT A 208     -15.115 -12.511  24.330  2.00  0.00           C  
ATOM   4059  C   CNT A 208     -14.869 -13.833  24.750  9.00  0.00           C  
ATOM   4060  C   CNT A 208     -15.881 -14.583  25.300  2.00  0.00           C  
ATOM   4061  C   CNT A 208     -15.645 -15.925  25.660  6.00  0.00           C  
ATOM   4062  C   CNT A 208     -16.726 -16.728  26.070  1.00  0.00           C  
ATOM   4063  C   CNT A 208     -16.482 -18.043  26.430  7.00  0.00           C  
ATOM   4064  C   CNT A 208     -17.530 -18.924  26.620  4.00  0.00           C  
ATOM   4065  C   CNT A 208     -18.043 -16.296  25.910  1.00  0.00           C  
ATOM   4066  C   CNT A 208     -19.039 -17.316  25.790  7.00  0.00           C  
ATOM   4067  C   CNT A 208     -18.804 -18.598  26.160  9.00  0.00           C  
ATOM   4068  C   CNT A 208     -19.824 -19.595  26.040  6.00  0.00           C  
ATOM   4069  C   CNT A 208     -20.247 -16.942  25.190  7.00  0.00           C  
ATOM   4070  C   CNT A 208     -21.201 -17.916  24.950  9.00  0.00           C  
ATOM   4071  C   CNT A 208     -20.980 -19.254  25.420  2.00  0.00           C  
ATOM   4072  C   CNT A 208     -21.854 -20.292  24.960  0.00  0.00           C  
ATOM   4073  C   CNT A 208     -22.309 -17.644  24.100  5.00  0.00           C  
ATOM   4074  C   CNT A 208     -23.059 -18.729  23.590  0.00  0.00           C  
ATOM   4075  C   CNT A 208     -22.863 -20.048  24.000  5.00  0.00           C  
ATOM   4076  C   CNT A 208     -23.334 -21.118  23.250  6.00  0.00           C  
ATOM   4077  C   CNT A 208     -23.795 -18.539  22.410  7.00  0.00           C  
ATOM   4078  C   CNT A 208     -24.327 -19.590  21.660  4.00  0.00           C  
ATOM   4079  C   CNT A 208     -24.005 -20.863  22.050  1.00  0.00           C  
ATOM   4080  C   CNT A 208     -24.126 -21.893  21.150  1.00  0.00           C  
ATOM   4081  C   CNT A 208     -24.615 -19.288  20.320  9.00  0.00           C  
ATOM   4082  C   CNT A 208     -24.608 -20.306  19.430  8.00  0.00           C  
ATOM   4083  C   CNT A 208     -24.522 -21.662  19.810  2.00  0.00           C  
ATOM   4084  C   CNT A 208     -24.258 -22.645  18.790  7.00  0.00           C  
ATOM   4085  C   CNT A 208     -24.661 -20.006  18.050  6.00  0.00           C  
ATOM   4086  C   CNT A 208     -24.287 -20.941  17.060  8.00  0.00           C  
ATOM   4087  C   CNT A 208     -23.954 -22.214  17.510  0.00  0.00           C  
ATOM   4088  C   CNT A 208     -23.361 -23.075  16.570  1.00  0.00           C  
ATOM   4089  C   CNT A 208     -24.027 -20.537  15.710  8.00  0.00           C  
ATOM   4090  C   CNT A 208     -23.318 -21.374  14.870  1.00  0.00           C  
ATOM   4091  C   CNT A 208     -22.997 -22.652  15.310  5.00  0.00           C  
ATOM   4092  C   CNT A 208     -22.089 -23.458  14.570  6.00  0.00           C  
ATOM   4093  C   CNT A 208     -22.586 -20.816  13.860  3.00  0.00           C  
ATOM   4094  C   CNT A 208     -21.630 -21.546  13.110  3.00  0.00           C  
ATOM   4095  C   CNT A 208     -21.295 -22.860  13.580  3.00  0.00           C  
ATOM   4096  C   CNT A 208     -20.108 -23.452  13.150  7.00  0.00           C  
ATOM   4097  C   CNT A 208     -20.700 -20.924  12.260  5.00  0.00           C  
ATOM   4098  C   CNT A 208     -19.414 -21.479  12.080  0.00  0.00           C  
ATOM   4099  C   CNT A 208     -19.123 -22.743  12.500  0.00  0.00           C  
ATOM   4100  C   CNT A 208     -17.830 -23.240  12.470  1.00  0.00           C  
ATOM   4101  C   CNT A 208     -18.413 -20.643  11.560  9.00  0.00           C  
ATOM   4102  C   CNT A 208     -17.069 -21.072  11.730  5.00  0.00           C  
ATOM   4103  C   CNT A 208     -16.821 -22.371  12.120  4.00  0.00           C  
ATOM   4104  C   CNT A 208     -15.488 -22.787  12.330  9.00  0.00           C  
ATOM   4105  C   CNT A 208     -15.998 -20.205  11.540  6.00  0.00           C  
ATOM   4106  C   CNT A 208     -14.687 -20.560  11.890  9.00  0.00           C  
ATOM   4107  C   CNT A 208     -14.461 -21.841  12.350  3.00  0.00           C  
ATOM   4108  C   CNT A 208     -13.168 -22.164  12.810  3.00  0.00           C  
ATOM   4109  C   CNT A 208     -13.708 -19.544  12.010  5.00  0.00           C  
ATOM   4110  C   CNT A 208     -12.606 -19.874  12.790  6.00  0.00           C  
ATOM   4111  C   CNT A 208     -12.242 -21.168  13.120  2.00  0.00           C  
ATOM   4112  C   CNT A 208     -11.133 -21.440  13.950  3.00  0.00           C  
ATOM   4113  C   CNT A 208     -11.798 -18.814  13.200  3.00  0.00           C  
ATOM   4114  C   CNT A 208     -10.873 -19.091  14.240  2.00  0.00           C  
ATOM   4115  C   CNT A 208     -10.473 -20.354  14.530  3.00  0.00           C  
ATOM   4116  C   CNT A 208      -9.702 -20.583  15.650  0.00  0.00           C  
ATOM   4117  C   CNT A 208     -10.341 -17.983  14.950  1.00  0.00           C  
ATOM   4118  C   CNT A 208      -9.621 -18.205  16.120  2.00  0.00           C  
ATOM   4119  C   CNT A 208      -9.280 -19.503  16.460  2.00  0.00           C  
ATOM   4120  C   CNT A 208      -8.771 -19.776  17.710  4.00  0.00           C  
ATOM   4121  C   CNT A 208      -9.372 -17.154  17.000  0.00  0.00           C  
ATOM   4122  C   CNT A 208      -9.030 -17.464  18.330  0.00  0.00           C  
ATOM   4123  C   CNT A 208      -8.764 -18.800  18.700  2.00  0.00           C  
ATOM   4124  C   CNT A 208      -8.865 -19.135  20.020  2.00  0.00           C  
ATOM   4125  C   CNT A 208      -9.178 -16.477  19.350  8.00  0.00           C  
ATOM   4126  C   CNT A 208      -9.313 -16.869  20.670  6.00  0.00           C  
ATOM   4127  C   CNT A 208      -9.139 -18.189  21.030  7.00  0.00           C  
ATOM   4128  C   CNT A 208      -9.389 -18.579  22.340  9.00  0.00           C  
ATOM   4129  C   CNT A 208      -9.864 -15.939  21.600  4.00  0.00           C  
ATOM   4130  C   CNT A 208     -10.466 -16.414  22.740  7.00  0.00           C  
ATOM   4131  C   CNT A 208     -10.208 -17.709  23.160  1.00  0.00           C  
ATOM   4132  C   CNT A 208     -10.774 -18.285  24.260  5.00  0.00           C  
ATOM   4133  C   CNT A 208     -11.415 -15.686  23.430  9.00  0.00           C  
ATOM   4134  C   CNT A 208     -12.161 -16.344  24.440  0.00  0.00           C  
ATOM   4135  C   CNT A 208     -11.921 -17.657  24.870  6.00  0.00           C  
ATOM   4136  C   CNT A 208     -12.847 -18.311  25.710  6.00  0.00           C  
ATOM   4137  C   CNT A 208     -13.314 -15.713  24.930  5.00  0.00           C  
ATOM   4138  C   CNT A 208     -14.326 -16.423  25.630  8.00  0.00           C  
ATOM   4139  C   CNT A 208     -14.119 -17.763  25.880  9.00  0.00           C  
ATOM   4140  C   CNT A 208     -15.181 -18.559  26.360  8.00  0.00           C  
ATOM   4141  C   CNT A 208     -14.912 -19.866  26.770  5.00  0.00           C  
ATOM   4142  C   CNT A 208     -15.912 -20.691  27.280  1.00  0.00           C  
ATOM   4143  C   CNT A 208     -15.640 -21.968  27.750  2.00  0.00           C  
ATOM   4144  C   CNT A 208     -16.763 -22.847  27.960  5.00  0.00           C  
ATOM   4145  C   CNT A 208     -17.260 -20.202  27.120  1.00  0.00           C  
ATOM   4146  C   CNT A 208     -18.291 -21.146  27.090  2.00  0.00           C  
ATOM   4147  C   CNT A 208     -17.971 -22.519  27.370  0.00  0.00           C  
ATOM   4148  C   CNT A 208     -18.996 -23.527  27.220  2.00  0.00           C  
ATOM   4149  C   CNT A 208     -19.504 -20.848  26.480  1.00  0.00           C  
ATOM   4150  C   CNT A 208     -20.342 -21.915  26.090  2.00  0.00           C  
ATOM   4151  C   CNT A 208     -20.081 -23.253  26.400  7.00  0.00           C  
ATOM   4152  C   CNT A 208     -20.908 -24.301  25.930  0.00  0.00           C  
ATOM   4153  C   CNT A 208     -21.473 -21.594  25.290  9.00  0.00           C  
ATOM   4154  C   CNT A 208     -22.205 -22.676  24.720  8.00  0.00           C  
ATOM   4155  C   CNT A 208     -21.918 -24.009  25.030  9.00  0.00           C  
ATOM   4156  C   CNT A 208     -22.556 -25.095  24.420  1.00  0.00           C  
ATOM   4157  C   CNT A 208     -23.053 -22.406  23.620  0.00  0.00           C  
ATOM   4158  C   CNT A 208     -23.526 -23.487  22.820  2.00  0.00           C  
ATOM   4159  C   CNT A 208     -23.370 -24.856  23.290  6.00  0.00           C  
ATOM   4160  C   CNT A 208     -23.420 -25.890  22.330  8.00  0.00           C  
ATOM   4161  C   CNT A 208     -23.904 -23.200  21.530  7.00  0.00           C  
ATOM   4162  C   CNT A 208     -23.815 -24.227  20.630  0.00  0.00           C  
ATOM   4163  C   CNT A 208     -23.615 -25.529  21.020  4.00  0.00           C  
ATOM   4164  C   CNT A 208     -23.282 -26.488  20.040  4.00  0.00           C  
ATOM   4165  C   CNT A 208     -23.940 -23.948  19.220  7.00  0.00           C  
ATOM   4166  C   CNT A 208     -23.407 -24.827  18.250  0.00  0.00           C  
ATOM   4167  C   CNT A 208     -23.072 -26.098  18.680  6.00  0.00           C  
ATOM   4168  C   CNT A 208     -22.626 -27.083  17.680  8.00  0.00           C  
ATOM   4169  C   CNT A 208     -23.020 -24.383  17.000  2.00  0.00           C  
ATOM   4170  C   CNT A 208     -22.333 -25.234  16.100  7.00  0.00           C  
ATOM   4171  C   CNT A 208     -22.086 -26.555  16.500  4.00  0.00           C  
ATOM   4172  C   CNT A 208     -21.181 -27.326  15.770  8.00  0.00           C  
ATOM   4173  C   CNT A 208     -21.760 -24.770  14.930  8.00  0.00           C  
ATOM   4174  C   CNT A 208     -20.732 -25.467  14.230  3.00  0.00           C  
ATOM   4175  C   CNT A 208     -20.412 -26.722  14.740  2.00  0.00           C  
ATOM   4176  C   CNT A 208     -19.241 -27.365  14.330  7.00  0.00           C  
ATOM   4177  C   CNT A 208     -19.790 -24.729  13.570  7.00  0.00           C  
ATOM   4178  C   CNT A 208     -18.482 -25.256  13.480  5.00  0.00           C  
ATOM   4179  C   CNT A 208     -18.215 -26.551  13.870  3.00  0.00           C  
ATOM   4180  C   CNT A 208     -16.941 -27.120  13.730  8.00  0.00           C  
ATOM   4181  C   CNT A 208     -17.523 -24.523  12.860  1.00  0.00           C  
ATOM   4182  C   CNT A 208     -16.237 -24.985  12.960  1.00  0.00           C  
ATOM   4183  C   CNT A 208     -15.894 -26.344  13.310  9.00  0.00           C  
ATOM   4184  C   CNT A 208     -14.543 -26.736  13.510  3.00  0.00           C  
ATOM   4185  C   CNT A 208     -15.160 -24.127  12.670  4.00  0.00           C  
ATOM   4186  C   CNT A 208     -13.838 -24.485  12.950  5.00  0.00           C  
ATOM   4187  C   CNT A 208     -13.508 -25.778  13.420  1.00  0.00           C  
ATOM   4188  C   CNT A 208     -12.204 -26.069  13.780  4.00  0.00           C  
ATOM   4189  C   CNT A 208     -12.840 -23.459  13.160  4.00  0.00           C  
ATOM   4190  C   CNT A 208     -11.597 -23.800  13.750  8.00  0.00           C  
ATOM   4191  C   CNT A 208     -11.243 -25.104  14.080  4.00  0.00           C  
ATOM   4192  C   CNT A 208     -10.287 -25.409  15.000  7.00  0.00           C  
ATOM   4193  C   CNT A 208     -10.769 -22.783  14.160  9.00  0.00           C  
ATOM   4194  C   CNT A 208      -9.896 -23.017  15.250  3.00  0.00           C  
ATOM   4195  C   CNT A 208      -9.613 -24.341  15.610  7.00  0.00           C  
ATOM   4196  C   CNT A 208      -8.817 -24.545  16.720  8.00  0.00           C  
ATOM   4197  C   CNT A 208      -9.479 -21.947  16.030  3.00  0.00           C  
ATOM   4198  C   CNT A 208      -8.654 -22.172  17.170  2.00  0.00           C  
ATOM   4199  C   CNT A 208      -8.407 -23.519  17.580  5.00  0.00           C  
ATOM   4200  C   CNT A 208      -7.944 -23.772  18.860  0.00  0.00           C  
ATOM   4201  C   CNT A 208      -8.458 -21.121  18.090  5.00  0.00           C  
ATOM   4202  C   CNT A 208      -8.163 -21.376  19.410  3.00  0.00           C  
ATOM   4203  C   CNT A 208      -7.929 -22.713  19.830  5.00  0.00           C  
ATOM   4204  C   CNT A 208      -7.926 -23.079  21.200  5.00  0.00           C  
ATOM   4205  C   CNT A 208      -8.459 -20.406  20.440  5.00  0.00           C  
ATOM   4206  C   CNT A 208      -8.536 -20.803  21.780  6.00  0.00           C  
ATOM   4207  C   CNT A 208      -8.315 -22.141  22.120  7.00  0.00           C  
ATOM   4208  C   CNT A 208      -8.668 -22.609  23.420  4.00  0.00           C  
ATOM   4209  C   CNT A 208      -9.159 -19.958  22.710  7.00  0.00           C  
ATOM   4210  C   CNT A 208      -9.703 -20.451  23.900  0.00  0.00           C  
ATOM   4211  C   CNT A 208      -9.465 -21.849  24.280  9.00  0.00           C  
ATOM   4212  C   CNT A 208     -10.107 -22.377  25.420  1.00  0.00           C  
ATOM   4213  C   CNT A 208     -10.563 -19.657  24.660  2.00  0.00           C  
ATOM   4214  C   CNT A 208     -11.380 -20.261  25.600  8.00  0.00           C  
ATOM   4215  C   CNT A 208     -11.132 -21.646  25.980  9.00  0.00           C  
ATOM   4216  C   CNT A 208     -12.043 -22.299  26.900  1.00  0.00           C  
ATOM   4217  C   CNT A 208     -12.577 -19.670  26.080  3.00  0.00           C  
ATOM   4218  C   CNT A 208     -13.611 -20.461  26.600  5.00  0.00           C  
ATOM   4219  C   CNT A 208     -13.285 -21.728  27.070  1.00  0.00           C  
ATOM   4220  C   CNT A 208     -14.346 -22.424  27.750  0.00  0.00           C  
ATOM   4221  C   CNT A 208     -14.056 -23.773  28.090  4.00  0.00           C  
ATOM   4222  C   CNT A 208     -15.145 -24.637  28.430  6.00  0.00           C  
ATOM   4223  C   CNT A 208     -14.912 -25.950  28.940  2.00  0.00           C  
ATOM   4224  C   CNT A 208     -16.094 -26.626  29.350  6.00  0.00           C  
ATOM   4225  C   CNT A 208     -16.482 -24.241  28.260  7.00  0.00           C  
ATOM   4226  C   CNT A 208     -17.626 -25.107  28.350  8.00  0.00           C  
ATOM   4227  C   CNT A 208     -17.400 -26.358  28.930  1.00  0.00           C  
ATOM   4228  C   CNT A 208     -18.559 -27.216  29.000  0.00  0.00           C  
ATOM   4229  C   CNT A 208     -18.810 -24.855  27.660  8.00  0.00           C  
ATOM   4230  C   CNT A 208     -19.635 -25.898  27.280  7.00  0.00           C  
ATOM   4231  C   CNT A 208     -19.548 -27.121  27.910  5.00  0.00           C  
ATOM   4232  C   CNT A 208     -20.227 -28.154  27.300  7.00  0.00           C  
ATOM   4233  C   CNT A 208     -20.576 -25.601  26.290  1.00  0.00           C  
ATOM   4234  C   CNT A 208     -21.316 -26.685  25.720  7.00  0.00           C  
ATOM   4235  C   CNT A 208     -21.176 -28.004  26.230  4.00  0.00           C  
ATOM   4236  C   CNT A 208     -22.034 -28.947  25.650  8.00  0.00           C  
ATOM   4237  C   CNT A 208     -22.269 -26.405  24.740  7.00  0.00           C  
ATOM   4238  C   CNT A 208     -22.848 -27.435  24.030  4.00  0.00           C  
ATOM   4239  C   CNT A 208     -22.647 -28.794  24.420  7.00  0.00           C  
ATOM   4240  C   CNT A 208     -22.956 -29.781  23.480  4.00  0.00           C  
ATOM   4241  C   CNT A 208     -23.170 -27.185  22.710  7.00  0.00           C  
ATOM   4242  C   CNT A 208     -23.137 -28.223  21.700  9.00  0.00           C  
ATOM   4243  C   CNT A 208     -22.975 -29.575  22.110  2.00  0.00           C  
ATOM   4244  C   CNT A 208     -22.735 -30.447  21.080  8.00  0.00           C  
ATOM   4245  C   CNT A 208     -22.992 -27.813  20.370  5.00  0.00           C  
ATOM   4246  C   CNT A 208     -22.581 -28.693  19.430  8.00  0.00           C  
ATOM   4247  C   CNT A 208     -22.389 -30.110  19.810  2.00  0.00           C  
ATOM   4248  C   CNT A 208     -21.792 -30.921  18.820  6.00  0.00           C  
ATOM   4249  C   CNT A 208     -22.247 -28.362  18.130  3.00  0.00           C  
ATOM   4250  C   CNT A 208     -21.605 -29.215  17.200  7.00  0.00           C  
ATOM   4251  C   CNT A 208     -21.486 -30.556  17.500  7.00  0.00           C  
ATOM   4252  C   CNT A 208     -20.937 -31.344  16.440  3.00  0.00           C  
ATOM   4253  C   CNT A 208     -20.930 -28.648  16.100  3.00  0.00           C  
ATOM   4254  C   CNT A 208     -19.962 -29.410  15.470  5.00  0.00           C  
ATOM   4255  C   CNT A 208     -19.866 -30.742  15.740  0.00  0.00           C  
ATOM   4256  C   CNT A 208     -18.610 -31.247  15.440  5.00  0.00           C  
ATOM   4257  C   CNT A 208     -19.056 -28.735  14.630  0.00  0.00           C  
ATOM   4258  C   CNT A 208     -17.749 -29.252  14.550  0.00  0.00           C  
ATOM   4259  C   CNT A 208     -17.511 -30.550  14.950  0.00  0.00           C  
ATOM   4260  C   CNT A 208     -16.164 -30.973  14.960  4.00  0.00           C  
ATOM   4261  C   CNT A 208     -16.664 -28.475  14.030  9.00  0.00           C  
ATOM   4262  C   CNT A 208     -15.373 -28.917  14.080  4.00  0.00           C  
ATOM   4263  C   CNT A 208     -15.088 -30.234  14.500  5.00  0.00           C  
ATOM   4264  C   CNT A 208     -13.744 -30.593  14.530  2.00  0.00           C  
ATOM   4265  C   CNT A 208     -14.268 -28.068  13.860  9.00  0.00           C  
ATOM   4266  C   CNT A 208     -12.933 -28.433  14.030  3.00  0.00           C  
ATOM   4267  C   CNT A 208     -12.648 -29.750  14.410  6.00  0.00           C  
ATOM   4268  C   CNT A 208     -11.268 -30.105  14.650  1.00  0.00           C  
ATOM   4269  C   CNT A 208     -11.965 -27.442  14.160  1.00  0.00           C  
ATOM   4270  C   CNT A 208     -10.791 -27.771  14.840  2.00  0.00           C  
ATOM   4271  C   CNT A 208     -10.368 -29.108  15.050  8.00  0.00           C  
ATOM   4272  C   CNT A 208      -9.172 -29.212  15.830  9.00  0.00           C  
ATOM   4273  C   CNT A 208      -9.983 -26.719  15.340  7.00  0.00           C  
ATOM   4274  C   CNT A 208      -9.018 -26.906  16.280  9.00  0.00           C  
ATOM   4275  C   CNT A 208      -8.441 -28.263  16.480  8.00  0.00           C  
ATOM   4276  C   CNT A 208      -7.333 -28.316  17.450  4.00  0.00           C  
ATOM   4277  C   CNT A 208      -8.521 -25.909  17.090  8.00  0.00           C  
ATOM   4278  C   CNT A 208      -7.879 -26.182  18.320  1.00  0.00           C  
ATOM   4279  C   CNT A 208      -7.322 -27.420  18.540  4.00  0.00           C  
ATOM   4280  C   CNT A 208      -7.003 -27.603  19.890  2.00  0.00           C  
ATOM   4281  C   CNT A 208      -7.746 -25.149  19.280  7.00  0.00           C  
ATOM   4282  C   CNT A 208      -7.539 -25.394  20.650  1.00  0.00           C  
ATOM   4283  C   CNT A 208      -7.193 -26.700  20.980  3.00  0.00           C  
ATOM   4284  C   CNT A 208      -7.144 -26.981  22.340  8.00  0.00           C  
ATOM   4285  C   CNT A 208      -7.609 -24.382  21.640  6.00  0.00           C  
ATOM   4286  C   CNT A 208      -7.722 -24.795  22.940  9.00  0.00           C  
ATOM   4287  C   CNT A 208      -7.342 -26.055  23.360  8.00  0.00           C  
ATOM   4288  C   CNT A 208      -7.343 -26.268  24.760  7.00  0.00           C  
ATOM   4289  C   CNT A 208      -8.412 -23.894  23.840  8.00  0.00           C  
ATOM   4290  C   CNT A 208      -8.818 -24.363  25.110  5.00  0.00           C  
ATOM   4291  C   CNT A 208      -8.417 -25.698  25.520  7.00  0.00           C  
ATOM   4292  C   CNT A 208      -9.161 -26.164  26.620  7.00  0.00           C  
ATOM   4293  C   CNT A 208      -9.802 -23.689  25.840  4.00  0.00           C  
ATOM   4294  C   CNT A 208     -10.659 -24.265  26.810  4.00  0.00           C  
ATOM   4295  C   CNT A 208     -10.301 -25.559  27.270  8.00  0.00           C  
ATOM   4296  C   CNT A 208     -11.187 -26.076  28.200  2.00  0.00           C  
ATOM   4297  C   CNT A 208     -11.830 -23.637  27.200  2.00  0.00           C  
ATOM   4298  C   CNT A 208     -12.781 -24.275  27.950  1.00  0.00           C  
ATOM   4299  C   CNT A 208     -12.516 -25.586  28.390  2.00  0.00           C  
ATOM   4300  C   CNT A 208     -13.573 -26.295  28.950  6.00  0.00           C  
ATOM   4301  N   LIG A 209     -31.723  44.368   9.640  5.00  0.00           N  
ATOM   4302  N   LIG A 209     -38.438  39.736  -1.850  4.00  0.00           N  
ATOM   4303  N   LIG A 209     -23.672  41.064  -7.020  9.00  0.00           N  
ATOM   4304  N   LIG A 209     -19.833  44.561   2.300  3.00  0.00           N  
ATOM   4305  N   LIG A 209     -20.023 -28.529  30.040  9.00  0.00           N  
ATOM   4306  N   LIG A 209     -22.633 -32.924  16.830  8.00  0.00           N  
ATOM   4307  N   LIG A 209      -6.296 -29.697  15.890  7.00  0.00           N  
ATOM   4308  N   LIG A 209      -5.380 -27.534  24.430  1.00  0.00           N  
ATOM   4309  C   LIG A 209     -30.312  44.394   9.750  8.00  0.00           C  
ATOM   4310  C   LIG A 209     -37.618  39.235  -2.930  8.00  0.00           C  
ATOM   4311  C   LIG A 209     -22.784  41.180  -6.020  7.00  0.00           C  
ATOM   4312  C   LIG A 209     -20.273  44.011   1.170  4.00  0.00           C  
ATOM   4313  C   LIG A 209     -18.816 -28.101  30.260  3.00  0.00           C  
ATOM   4314  C   LIG A 209     -21.389 -32.806  16.180  1.00  0.00           C  
ATOM   4315  C   LIG A 209      -6.205 -29.388  17.240  0.00  0.00           C  
ATOM   4316  C   LIG A 209      -6.344 -27.330  25.400  5.00  0.00           C  
ATOM   4317  O   LIG A 209     -29.279  44.882  10.070  2.00  0.00           O  
ATOM   4318  O   LIG A 209     -37.379  39.246  -4.020  9.00  0.00           O  
ATOM   4319  O   LIG A 209     -21.834  41.617  -5.610  9.00  0.00           O  
ATOM   4320  O   LIG A 209     -20.483  44.092   0.040  7.00  0.00           O  
ATOM   4321  O   LIG A 209     -17.825 -28.085  30.870  3.00  0.00           O  
ATOM   4322  O   LIG A 209     -20.562 -33.275  15.590  2.00  0.00           O  
ATOM   4323  O   LIG A 209      -5.653 -29.521  18.210  6.00  0.00           O  
ATOM   4324  O   LIG A 209      -6.788 -27.576  26.450  5.00  0.00           O  
ATOM   4325  C1  LIG A 209     -32.473  45.282  10.450  7.00  0.00           C  
ATOM   4326  C1  LIG A 209     -39.769  40.296  -2.250  8.00  0.00           C  
ATOM   4327  C1  LIG A 209     -23.209  41.107  -8.450  1.00  0.00           C  
ATOM   4328  C1  LIG A 209     -18.648  45.498   2.350  4.00  0.00           C  
ATOM   4329  C1  LIG A 209     -20.775 -28.914  31.190  8.00  0.00           C  
ATOM   4330  C1  LIG A 209     -23.230 -34.164  17.130  2.00  0.00           C  
ATOM   4331  C1  LIG A 209      -5.414 -30.683  15.290  9.00  0.00           C  
ATOM   4332  C1  LIG A 209      -4.461 -28.610  24.540  9.00  0.00           C  
ATOM   4333  N1  LIG A 209     -34.007  43.337  11.100  7.00  0.00           N  
ATOM   4334  N1  LIG A 209     -40.695  38.053  -1.630  2.00  0.00           N  
ATOM   4335  N1  LIG A 209     -23.056  38.579  -8.320  2.00  0.00           N  
ATOM   4336  N1  LIG A 209     -17.219  43.985   0.830  6.00  0.00           N  
ATOM   4337  N1  LIG A 209     -22.576 -27.427  30.200  2.00  0.00           N  
ATOM   4338  N1  LIG A 209     -25.148 -33.304  18.470  6.00  0.00           N  
ATOM   4339  N1  LIG A 209      -7.074 -31.472  13.550  0.00  0.00           N  
ATOM   4340  N1  LIG A 209      -3.315 -28.076  22.470  3.00  0.00           N  
ATOM   4341  O1  LIG A 209     -35.100  38.873  10.550  1.00  0.00           O  
ATOM   4342  O1  LIG A 209     -39.297  34.259   0.610  7.00  0.00           O  
ATOM   4343  O1  LIG A 209     -23.421  34.176  -7.110  0.00  0.00           O  
ATOM   4344  O1  LIG A 209     -17.458  40.875  -2.550  8.00  0.00           O  
ATOM   4345  O1  LIG A 209     -24.482 -24.745  26.890  0.00  0.00           O  
ATOM   4346  O1  LIG A 209     -25.996 -29.724  21.280  4.00  0.00           O  
ATOM   4347  O1  LIG A 209     -11.470 -32.014  12.150  4.00  0.00           O  
ATOM   4348  O1  LIG A 209      -4.123 -26.224  18.200  8.00  0.00           O  
ATOM   4349  C2  LIG A 209     -33.335  44.542  11.590  5.00  0.00           C  
ATOM   4350  C2  LIG A 209     -40.637  39.086  -2.690  2.00  0.00           C  
ATOM   4351  C2  LIG A 209     -22.403  39.856  -8.730  4.00  0.00           C  
ATOM   4352  C2  LIG A 209     -17.416  44.632   2.140  1.00  0.00           C  
ATOM   4353  C2  LIG A 209     -21.835 -27.799  31.460  2.00  0.00           C  
ATOM   4354  C2  LIG A 209     -24.758 -34.004  17.270  0.00  0.00           C  
ATOM   4355  C2  LIG A 209      -5.737 -30.929  13.820  6.00  0.00           C  
ATOM   4356  C2  LIG A 209      -3.100 -28.339  23.890  3.00  0.00           C  
ATOM   4357  N2  LIG A 209     -35.459  41.985  10.040  7.00  0.00           N  
ATOM   4358  N2  LIG A 209     -40.999  36.964   0.240  5.00  0.00           N  
ATOM   4359  N2  LIG A 209     -24.396  36.738  -8.510  7.00  0.00           N  
ATOM   4360  N2  LIG A 209     -17.145  43.774  -1.370  6.00  0.00           N  
ATOM   4361  N2  LIG A 209     -24.140 -27.462  28.630  5.00  0.00           N  
ATOM   4362  N2  LIG A 209     -25.598 -32.763  20.630  9.00  0.00           N  
ATOM   4363  N2  LIG A 209      -8.852 -32.857  13.810  8.00  0.00           N  
ATOM   4364  N2  LIG A 209      -3.363 -28.540  20.310  0.00  0.00           N  
ATOM   4365  C3  LIG A 209     -35.090  43.208  10.280  6.00  0.00           C  
ATOM   4366  C3  LIG A 209     -41.126  38.104  -0.350  6.00  0.00           C  
ATOM   4367  C3  LIG A 209     -24.170  38.063  -8.900  0.00  0.00           C  
ATOM   4368  C3  LIG A 209     -17.101  44.685  -0.370  4.00  0.00           C  
ATOM   4369  C3  LIG A 209     -23.572 -28.156  29.600  2.00  0.00           C  
ATOM   4370  C3  LIG A 209     -25.181 -33.744  19.760  7.00  0.00           C  
ATOM   4371  C3  LIG A 209      -7.587 -32.593  14.180  8.00  0.00           C  
ATOM   4372  C3  LIG A 209      -3.202 -29.029  21.540  9.00  0.00           C  
ATOM   4373  N3  LIG A 209     -32.356  41.680  11.820  9.00  0.00           N  
ATOM   4374  N3  LIG A 209     -39.298  36.350  -2.840  1.00  0.00           N  
ATOM   4375  N3  LIG A 209     -21.372  37.648  -6.870  3.00  0.00           N  
ATOM   4376  N3  LIG A 209     -17.250  41.567   1.360  4.00  0.00           N  
ATOM   4377  N3  LIG A 209     -21.756 -25.134  29.790  7.00  0.00           N  
ATOM   4378  N3  LIG A 209     -25.562 -30.966  17.500  5.00  0.00           N  
ATOM   4379  N3  LIG A 209      -8.094 -29.760  12.090  2.00  0.00           N  
ATOM   4380  N3  LIG A 209      -3.705 -25.615  22.270  3.00  0.00           N  
ATOM   4381  C4  LIG A 209     -34.476  41.195  10.710  7.00  0.00           C  
ATOM   4382  C4  LIG A 209     -40.194  36.120  -0.600  4.00  0.00           C  
ATOM   4383  C4  LIG A 209     -23.322  36.453  -7.710  3.00  0.00           C  
ATOM   4384  C4  LIG A 209     -17.161  42.514  -0.800  9.00  0.00           C  
ATOM   4385  C4  LIG A 209     -23.573 -26.200  28.610  8.00  0.00           C  
ATOM   4386  C4  LIG A 209     -25.613 -31.613  19.840  7.00  0.00           C  
ATOM   4387  C4  LIG A 209      -9.187 -31.785  12.940  8.00  0.00           C  
ATOM   4388  C4  LIG A 209      -3.623 -27.209  20.450  4.00  0.00           C  
ATOM   4389  N4  LIG A 209     -33.183  39.444  11.670  4.00  0.00           N  
ATOM   4390  N4  LIG A 209     -38.906  34.386  -1.470  9.00  0.00           N  
ATOM   4391  N4  LIG A 209     -21.844  35.419  -6.260  8.00  0.00           N  
ATOM   4392  N4  LIG A 209     -17.225  40.149  -0.510  5.00  0.00           N  
ATOM   4393  N4  LIG A 209     -22.916 -24.025  28.100  9.00  0.00           N  
ATOM   4394  N4  LIG A 209     -26.040 -29.412  19.140  9.00  0.00           N  
ATOM   4395  N4  LIG A 209     -10.332 -30.275  11.540  3.00  0.00           N  
ATOM   4396  N4  LIG A 209      -4.241 -25.036  20.010  2.00  0.00           N  
ATOM   4397  C5  LIG A 209     -33.505  42.050  11.230  9.00  0.00           C  
ATOM   4398  C5  LIG A 209     -39.987  36.815  -1.760  8.00  0.00           C  
ATOM   4399  C5  LIG A 209     -22.498  37.538  -7.620  6.00  0.00           C  
ATOM   4400  C5  LIG A 209     -17.180  42.653   0.570  2.00  0.00           C  
ATOM   4401  C5  LIG A 209     -22.649 -26.180  29.600  9.00  0.00           C  
ATOM   4402  C5  LIG A 209     -25.446 -31.932  18.530  1.00  0.00           C  
ATOM   4403  C5  LIG A 209      -8.123 -30.932  12.810  4.00  0.00           C  
ATOM   4404  C5  LIG A 209      -3.599 -26.868  21.810  7.00  0.00           C  
ATOM   4405  N5  LIG A 209     -31.115  39.796  12.280  3.00  0.00           N  
ATOM   4406  N5  LIG A 209     -38.207  34.599  -3.560  2.00  0.00           N  
ATOM   4407  N5  LIG A 209     -20.027  36.493  -5.500  0.00  0.00           N  
ATOM   4408  N5  LIG A 209     -17.639  39.323   1.440  7.00  0.00           N  
ATOM   4409  N5  LIG A 209     -21.463 -22.956  29.460  9.00  0.00           N  
ATOM   4410  N5  LIG A 209     -25.908 -28.844  16.960  0.00  0.00           N  
ATOM   4411  N5  LIG A 209      -9.500 -28.388  10.800  1.00  0.00           N  
ATOM   4412  N5  LIG A 209      -4.555 -23.556  21.660  6.00  0.00           N  
ATOM   4413  C6  LIG A 209     -34.320  39.753  10.960  0.00  0.00           C  
ATOM   4414  C6  LIG A 209     -39.438  34.888  -0.410  5.00  0.00           C  
ATOM   4415  C6  LIG A 209     -22.918  35.250  -7.040  1.00  0.00           C  
ATOM   4416  C6  LIG A 209     -17.320  41.157  -1.390  4.00  0.00           C  
ATOM   4417  C6  LIG A 209     -23.706 -24.987  27.740  9.00  0.00           C  
ATOM   4418  C6  LIG A 209     -25.868 -30.193  20.180  6.00  0.00           C  
ATOM   4419  C6  LIG A 209     -10.403 -31.423  12.150  3.00  0.00           C  
ATOM   4420  C6  LIG A 209      -3.923 -26.158  19.420  9.00  0.00           C  
ATOM   4421  C7  LIG A 209     -32.203  40.372  11.870  6.00  0.00           C  
ATOM   4422  C7  LIG A 209     -38.896  35.112  -2.620  9.00  0.00           C  
ATOM   4423  C7  LIG A 209     -21.112  36.565  -6.190  7.00  0.00           C  
ATOM   4424  C7  LIG A 209     -17.238  40.379   0.790  7.00  0.00           C  
ATOM   4425  C7  LIG A 209     -22.083 -24.047  29.140  7.00  0.00           C  
ATOM   4426  C7  LIG A 209     -25.950 -29.806  17.890  5.00  0.00           C  
ATOM   4427  C7  LIG A 209      -9.239 -29.520  11.450  9.00  0.00           C  
ATOM   4428  C7  LIG A 209      -4.098 -24.762  21.310  8.00  0.00           C  
ATOM   4429  H   LIG A 209     -32.281  43.504   9.430  1.00  0.00           H  
ATOM   4430  H   LIG A 209     -38.527  39.205  -1.020  1.00  0.00           H  
ATOM   4431  H   LIG A 209     -24.340  40.329  -6.940  0.00  0.00           H  
ATOM   4432  H   LIG A 209     -19.810  43.981   3.090  5.00  0.00           H  
ATOM   4433  H   LIG A 209     -20.596 -28.179  29.300  3.00  0.00           H  
ATOM   4434  H   LIG A 209     -22.937 -32.254  17.430  5.00  0.00           H  
ATOM   4435  H   LIG A 209      -6.588 -28.943  15.240  3.00  0.00           H  
ATOM   4436  H   LIG A 209      -5.330 -27.067  23.510  7.00  0.00           H  
ATOM   4437  H1  LIG A 209     -33.233  45.732   9.820  6.00  0.00           H  
ATOM   4438  H1  LIG A 209     -39.662  40.983  -3.110  3.00  0.00           H  
ATOM   4439  H1  LIG A 209     -22.656  42.037  -8.650  9.00  0.00           H  
ATOM   4440  H1  LIG A 209     -18.600  45.950   3.310  6.00  0.00           H  
ATOM   4441  H1  LIG A 209     -20.211 -28.990  32.120  1.00  0.00           H  
ATOM   4442  H1  LIG A 209     -22.929 -34.605  18.020  9.00  0.00           H  
ATOM   4443  H1  LIG A 209      -5.564 -31.592  15.900  5.00  0.00           H  
ATOM   4444  H1  LIG A 209      -4.873 -29.638  24.220  3.00  0.00           H  
ATOM   4445  H2  LIG A 209     -31.732  45.958  10.920  4.00  0.00           H  
ATOM   4446  H2  LIG A 209     -40.235  40.731  -1.370  0.00  0.00           H  
ATOM   4447  H2  LIG A 209     -24.125  41.018  -9.140  4.00  0.00           H  
ATOM   4448  H2  LIG A 209     -18.739  46.282   1.520  9.00  0.00           H  
ATOM   4449  H2  LIG A 209     -21.342 -29.816  31.090  3.00  0.00           H  
ATOM   4450  H2  LIG A 209     -22.930 -34.810  16.280  6.00  0.00           H  
ATOM   4451  H2  LIG A 209      -4.337 -30.383  15.440  1.00  0.00           H  
ATOM   4452  H2  LIG A 209      -4.090 -28.667  25.580  1.00  0.00           H  
ATOM   4453  H3  LIG A 209     -34.028  45.220  11.980  4.00  0.00           H  
ATOM   4454  H3  LIG A 209     -40.140  38.699  -3.630  3.00  0.00           H  
ATOM   4455  H3  LIG A 209     -21.501  40.087  -8.220  7.00  0.00           H  
ATOM   4456  H3  LIG A 209     -17.421  43.868   2.870  3.00  0.00           H  
ATOM   4457  H3  LIG A 209     -21.290 -26.902  31.920  1.00  0.00           H  
ATOM   4458  H3  LIG A 209     -25.289 -34.946  17.400  3.00  0.00           H  
ATOM   4459  H3  LIG A 209      -4.908 -31.520  13.500  2.00  0.00           H  
ATOM   4460  H3  LIG A 209      -2.452 -29.174  24.040  1.00  0.00           H  
ATOM   4461  H4  LIG A 209     -32.679  44.326  12.440  5.00  0.00           H  
ATOM   4462  H4  LIG A 209     -41.643  39.469  -2.930  9.00  0.00           H  
ATOM   4463  H4  LIG A 209     -22.238  39.867  -9.830  6.00  0.00           H  
ATOM   4464  H4  LIG A 209     -16.591  45.240   2.420  8.00  0.00           H  
ATOM   4465  H4  LIG A 209     -22.589 -28.097  32.240  9.00  0.00           H  
ATOM   4466  H4  LIG A 209     -25.247 -33.522  16.510  2.00  0.00           H  
ATOM   4467  H4  LIG A 209      -5.668 -29.968  13.320  1.00  0.00           H  
ATOM   4468  H4  LIG A 209      -2.651 -27.457  24.390  3.00  0.00           H  
ATOM   4469  H5  LIG A 209     -35.701  44.070  10.220  1.00  0.00           H  
ATOM   4470  H5  LIG A 209     -41.668  38.968   0.020  7.00  0.00           H  
ATOM   4471  H5  LIG A 209     -24.805  38.571  -9.540  8.00  0.00           H  
ATOM   4472  H5  LIG A 209     -17.075  45.692  -0.560  9.00  0.00           H  
ATOM   4473  H5  LIG A 209     -23.728 -29.283  29.940  9.00  0.00           H  
ATOM   4474  H5  LIG A 209     -25.084 -34.747  19.970  9.00  0.00           H  
ATOM   4475  H5  LIG A 209      -7.106 -33.209  14.940  1.00  0.00           H  
ATOM   4476  H5  LIG A 209      -2.902 -30.070  21.750  8.00  0.00           H  
ATOM   4477  H6  LIG A 209     -33.125  38.545  12.030  2.00  0.00           H  
ATOM   4478  H6  LIG A 209     -38.455  33.517  -1.410  4.00  0.00           H  
ATOM   4479  H6  LIG A 209     -21.559  34.589  -5.730  5.00  0.00           H  
ATOM   4480  H6  LIG A 209     -17.365  39.250  -0.930  0.00  0.00           H  
ATOM   4481  H6  LIG A 209     -23.151 -23.170  27.660  1.00  0.00           H  
ATOM   4482  H6  LIG A 209     -26.144 -28.463  19.280  6.00  0.00           H  
ATOM   4483  H6  LIG A 209     -11.184 -30.088  11.130  0.00  0.00           H  
ATOM   4484  H6  LIG A 209      -4.571 -24.330  19.430  9.00  0.00           H  
ATOM   4485  H7  LIG A 209     -31.096  38.823  12.190  3.00  0.00           H  
ATOM   4486  H7  LIG A 209     -38.295  33.585  -3.640  3.00  0.00           H  
ATOM   4487  H7  LIG A 209     -19.751  35.637  -5.040  5.00  0.00           H  
ATOM   4488  H7  LIG A 209     -17.562  38.408   1.000  3.00  0.00           H  
ATOM   4489  H7  LIG A 209     -20.583 -22.941  30.000  9.00  0.00           H  
ATOM   4490  H7  LIG A 209     -25.732 -29.099  16.040  3.00  0.00           H  
ATOM   4491  H7  LIG A 209     -10.379 -28.112  10.460  8.00  0.00           H  
ATOM   4492  H7  LIG A 209      -4.708 -22.842  20.920  4.00  0.00           H  
ATOM   4493  H8  LIG A 209     -30.287  40.364  12.120  6.00  0.00           H  
ATOM   4494  H8  LIG A 209     -38.133  35.214  -4.390  4.00  0.00           H  
ATOM   4495  H8  LIG A 209     -19.405  37.295  -5.570  2.00  0.00           H  
ATOM   4496  H8  LIG A 209     -17.790  39.447   2.380  1.00  0.00           H  
ATOM   4497  H8  LIG A 209     -21.680 -22.117  28.930  3.00  0.00           H  
ATOM   4498  H8  LIG A 209     -26.422 -28.045  17.190  8.00  0.00           H  
ATOM   4499  H8  LIG A 209      -8.744 -27.715  10.900  1.00  0.00           H  
ATOM   4500  H8  LIG A 209      -4.607 -23.393  22.610  4.00  0.00           H  
END
