# Supplementary material for: Molecular Dynamics Study of the Interaction of Carbon Nanotubes with Telomeric DNA Fragment Containing Noncanonical G-Quadruplex and i-Motif Forms
Source: Int J Mol Sci. 2020 Mar 11;21(6):1925. doi: 10.3390/ijms21061925 (PMC7139311; doi:10.3390/ijms21061925)
Supplement: Supplementary file 1 [file ijms-21-01925-s001.zip › fig4_n10.pdb]

ATOM      1  C5' DG5 A   1     -27.297  75.586  -9.320  1.00  0.00           C  
ATOM      2  O5' DG5 A   1     -28.111  74.873  -8.390  8.00  0.00           O  
ATOM      3  C4' DG5 A   1     -25.981  74.827  -9.730  0.00  0.00           C  
ATOM      4  O4' DG5 A   1     -25.001  74.824  -8.650  8.00  0.00           O  
ATOM      5  C3' DG5 A   1     -26.275  73.344 -10.040  0.00  0.00           C  
ATOM      6  O3' DG5 A   1     -25.372  72.895 -11.110  5.00  0.00           O  
ATOM      7  C2' DG5 A   1     -25.914  72.671  -8.700  3.00  0.00           C  
ATOM      8  C1' DG5 A   1     -24.743  73.520  -8.170  6.00  0.00           C  
ATOM      9  N1  DG5 A   1     -27.133  74.199  -3.630  2.00  0.00           N  
ATOM     10  C2  DG5 A   1     -27.576  74.361  -4.900  9.00  0.00           C  
ATOM     11  N2  DG5 A   1     -28.719  74.942  -4.990  8.00  0.00           N  
ATOM     12  N3  DG5 A   1     -26.887  74.174  -6.020  9.00  0.00           N  
ATOM     13  C4  DG5 A   1     -25.643  73.726  -5.760  4.00  0.00           C  
ATOM     14  C5  DG5 A   1     -25.080  73.571  -4.540  2.00  0.00           C  
ATOM     15  C6  DG5 A   1     -25.869  73.703  -3.370  2.00  0.00           C  
ATOM     16  O6  DG5 A   1     -25.564  73.598  -2.180  3.00  0.00           O  
ATOM     17  N7  DG5 A   1     -23.718  73.309  -4.650  9.00  0.00           N  
ATOM     18  C8  DG5 A   1     -23.527  73.159  -5.920  6.00  0.00           C  
ATOM     19  N9  DG5 A   1     -24.687  73.438  -6.680  1.00  0.00           N  
ATOM     20 HO5' DG5 A   1     -27.580  74.539  -7.660  9.00  0.00           H  
ATOM     21  H1  DG5 A   1     -27.754  74.496  -2.920  9.00  0.00           H  
ATOM     22  H8  DG5 A   1     -22.628  72.822  -6.310  9.00  0.00           H  
ATOM     23  H1' DG5 A   1     -23.799  73.171  -8.590  9.00  0.00           H  
ATOM     24  H2' DG5 A   1     -26.746  72.756  -7.920  7.00  0.00           H  
ATOM     25  H21 DG5 A   1     -29.336  75.047  -4.210  2.00  0.00           H  
ATOM     26  H3' DG5 A   1     -27.349  73.108 -10.120  8.00  0.00           H  
ATOM     27  H22 DG5 A   1     -28.900  75.422  -5.860  1.00  0.00           H  
ATOM     28  H4' DG5 A   1     -25.618  75.227 -10.620  0.00  0.00           H  
ATOM     29  H5' DG5 A   1     -27.056  76.545  -9.070  1.00  0.00           H  
ATOM     30 H2'' DG5 A   1     -25.611  71.690  -8.910  6.00  0.00           H  
ATOM     31 H5'' DG5 A   1     -27.893  75.530 -10.270  0.00  0.00           H  
ATOM     32  P    DG A   2     -25.451  71.415 -11.690  1.00  0.00           P  
ATOM     33  C5'  DG A   2     -23.168  70.719 -10.540  1.00  0.00           C  
ATOM     34  O5'  DG A   2     -24.600  70.546 -10.710  8.00  0.00           O  
ATOM     35  C4'  DG A   2     -22.735  69.986  -9.270  3.00  0.00           C  
ATOM     36  O4'  DG A   2     -23.286  70.578  -8.060  7.00  0.00           O  
ATOM     37  C3'  DG A   2     -23.014  68.486  -9.150  9.00  0.00           C  
ATOM     38  O3'  DG A   2     -21.907  67.669  -9.070  4.00  0.00           O  
ATOM     39  C2'  DG A   2     -24.022  68.359  -8.060  3.00  0.00           C  
ATOM     40  C1'  DG A   2     -23.601  69.541  -7.180  2.00  0.00           C  
ATOM     41  N1   DG A   2     -24.672  70.114  -2.230  5.00  0.00           N  
ATOM     42  C2   DG A   2     -23.554  69.964  -2.830  1.00  0.00           C  
ATOM     43  N2   DG A   2     -22.569  69.890  -2.050  1.00  0.00           N  
ATOM     44  N3   DG A   2     -23.342  69.776  -4.130  9.00  0.00           N  
ATOM     45  C4   DG A   2     -24.526  69.921  -4.800  5.00  0.00           C  
ATOM     46  C5   DG A   2     -25.800  70.123  -4.320  6.00  0.00           C  
ATOM     47  C6   DG A   2     -25.879  70.281  -2.920  6.00  0.00           C  
ATOM     48  O6   DG A   2     -26.854  70.549  -2.270  4.00  0.00           O  
ATOM     49  N7   DG A   2     -26.697  70.312  -5.370  0.00  0.00           N  
ATOM     50  C8   DG A   2     -26.028  70.049  -6.450  0.00  0.00           C  
ATOM     51  N9   DG A   2     -24.666  69.842  -6.190  8.00  0.00           N  
ATOM     52  OP1  DG A   2     -24.750  71.380 -13.030  5.00  0.00           O  
ATOM     53  OP2  DG A   2     -26.798  70.913 -11.530  9.00  0.00           O1-
ATOM     54  H1   DG A   2     -24.740  70.189  -1.190  3.00  0.00           H  
ATOM     55  H8   DG A   2     -26.455  70.092  -7.440  0.00  0.00           H  
ATOM     56  H1'  DG A   2     -22.682  69.265  -6.560  7.00  0.00           H  
ATOM     57  H2'  DG A   2     -25.005  68.583  -8.400  8.00  0.00           H  
ATOM     58  H21  DG A   2     -22.664  70.122  -1.100  4.00  0.00           H  
ATOM     59  H3'  DG A   2     -23.509  68.193 -10.060  8.00  0.00           H  
ATOM     60  H22  DG A   2     -21.654  69.883  -2.480  0.00  0.00           H  
ATOM     61  H4'  DG A   2     -21.559  70.114  -9.250  2.00  0.00           H  
ATOM     62  H5'  DG A   2     -22.914  71.740 -10.470  2.00  0.00           H  
ATOM     63 H2''  DG A   2     -23.940  67.356  -7.590  0.00  0.00           H  
ATOM     64 H5''  DG A   2     -22.508  70.329 -11.310  1.00  0.00           H  
ATOM     65  P    DG A   3     -21.902  66.104  -9.350  1.00  0.00           P  
ATOM     66  C5'  DG A   3     -21.125  65.466  -7.050  4.00  0.00           C  
ATOM     67  O5'  DG A   3     -22.131  65.344  -7.990  2.00  0.00           O  
ATOM     68  C4'  DG A   3     -21.363  64.939  -5.660  7.00  0.00           C  
ATOM     69  O4'  DG A   3     -22.345  65.726  -5.030  7.00  0.00           O  
ATOM     70  C3'  DG A   3     -21.836  63.417  -5.530  2.00  0.00           C  
ATOM     71  O3'  DG A   3     -21.194  62.738  -4.460  7.00  0.00           O  
ATOM     72  C2'  DG A   3     -23.287  63.669  -5.320  3.00  0.00           C  
ATOM     73  C1'  DG A   3     -23.278  64.890  -4.390  4.00  0.00           C  
ATOM     74  N1   DG A   3     -26.712  67.207  -1.560  3.00  0.00           N  
ATOM     75  C2   DG A   3     -25.516  66.694  -1.270  9.00  0.00           C  
ATOM     76  N2   DG A   3     -25.146  66.751   0.000  4.00  0.00           N  
ATOM     77  N3   DG A   3     -24.751  65.978  -2.080  1.00  0.00           N  
ATOM     78  C4   DG A   3     -25.208  66.007  -3.340  7.00  0.00           C  
ATOM     79  C5   DG A   3     -26.393  66.664  -3.800  2.00  0.00           C  
ATOM     80  C6   DG A   3     -27.247  67.323  -2.860  0.00  0.00           C  
ATOM     81  O6   DG A   3     -28.305  67.883  -2.910  5.00  0.00           O  
ATOM     82  N7   DG A   3     -26.425  66.478  -5.210  0.00  0.00           N  
ATOM     83  C8   DG A   3     -25.367  65.796  -5.510  9.00  0.00           C  
ATOM     84  N9   DG A   3     -24.557  65.530  -4.420  9.00  0.00           N  
ATOM     85  OP1  DG A   3     -20.541  65.783  -9.780  8.00  0.00           O  
ATOM     86  OP2  DG A   3     -23.041  65.754 -10.170  1.00  0.00           O1-
ATOM     87  H1   DG A   3     -27.257  67.737  -0.930  7.00  0.00           H  
ATOM     88  H8   DG A   3     -25.104  65.546  -6.540  3.00  0.00           H  
ATOM     89  H1'  DG A   3     -23.035  64.642  -3.350  9.00  0.00           H  
ATOM     90  H2'  DG A   3     -23.910  63.837  -6.310  5.00  0.00           H  
ATOM     91  H21  DG A   3     -25.795  67.010   0.730  2.00  0.00           H  
ATOM     92  H3'  DG A   3     -21.667  62.920  -6.470  4.00  0.00           H  
ATOM     93  H22  DG A   3     -24.427  66.050   0.210  4.00  0.00           H  
ATOM     94  H4'  DG A   3     -20.457  65.044  -5.120  8.00  0.00           H  
ATOM     95  H5'  DG A   3     -20.816  66.496  -7.050  8.00  0.00           H  
ATOM     96 H2''  DG A   3     -23.708  62.753  -4.850  8.00  0.00           H  
ATOM     97 H5''  DG A   3     -20.259  64.988  -7.380  4.00  0.00           H  
ATOM     98  P    DT A   4     -21.653  61.303  -3.900  0.00  0.00           P  
ATOM     99  C5'  DT A   4     -22.024  61.747  -1.430  1.00  0.00           C  
ATOM    100  O5'  DT A   4     -22.653  61.405  -2.650  3.00  0.00           O  
ATOM    101  C4'  DT A   4     -22.931  61.943  -0.210  6.00  0.00           C  
ATOM    102  O4'  DT A   4     -23.975  62.843  -0.630  4.00  0.00           O  
ATOM    103  C3'  DT A   4     -23.609  60.661   0.260  8.00  0.00           C  
ATOM    104  O3'  DT A   4     -23.393  60.374   1.670  2.00  0.00           O  
ATOM    105  C2'  DT A   4     -25.037  60.829  -0.030  5.00  0.00           C  
ATOM    106  C1'  DT A   4     -25.182  62.355  -0.030  3.00  0.00           C  
ATOM    107  N1   DT A   4     -26.245  62.946  -0.900  6.00  0.00           N  
ATOM    108  C2   DT A   4     -27.323  63.644  -0.380  9.00  0.00           C  
ATOM    109  O2   DT A   4     -27.421  63.728   0.810  1.00  0.00           O  
ATOM    110  N3   DT A   4     -28.354  64.064  -1.210  6.00  0.00           N  
ATOM    111  C4   DT A   4     -28.278  63.930  -2.550  3.00  0.00           C  
ATOM    112  O4   DT A   4     -29.110  64.420  -3.330  9.00  0.00           O  
ATOM    113  C5   DT A   4     -27.160  63.111  -3.050  3.00  0.00           C  
ATOM    114  C6   DT A   4     -26.219  62.623  -2.220  0.00  0.00           C  
ATOM    115  C7   DT A   4     -27.061  62.685  -4.470  4.00  0.00           C  
ATOM    116  OP1  DT A   4     -20.421  60.688  -3.430  5.00  0.00           O  
ATOM    117  OP2  DT A   4     -22.294  60.674  -5.020  4.00  0.00           O1-
ATOM    118  H3   DT A   4     -29.180  64.419  -0.770  9.00  0.00           H  
ATOM    119  H6   DT A   4     -25.403  62.037  -2.640  9.00  0.00           H  
ATOM    120  H1'  DT A   4     -25.217  62.694   1.010  8.00  0.00           H  
ATOM    121  H2'  DT A   4     -25.247  60.519  -1.020  6.00  0.00           H  
ATOM    122  H3'  DT A   4     -23.260  59.785  -0.290  0.00  0.00           H  
ATOM    123  H4'  DT A   4     -22.279  62.323   0.570  7.00  0.00           H  
ATOM    124  H5'  DT A   4     -21.414  62.584  -1.550  0.00  0.00           H  
ATOM    125  H71  DT A   4     -26.303  61.942  -4.620  0.00  0.00           H  
ATOM    126  H72  DT A   4     -28.029  62.311  -4.780  3.00  0.00           H  
ATOM    127  H73  DT A   4     -26.820  63.452  -5.230  7.00  0.00           H  
ATOM    128 H2''  DT A   4     -25.683  60.371   0.720  6.00  0.00           H  
ATOM    129 H5''  DT A   4     -21.339  60.936  -1.230  8.00  0.00           H  
ATOM    130  P    DT A   5     -23.702  58.931   2.290  5.00  0.00           P  
ATOM    131  C5'  DT A   5     -25.453  59.789   4.010  3.00  0.00           C  
ATOM    132  O5'  DT A   5     -25.203  58.968   2.850  2.00  0.00           O  
ATOM    133  C4'  DT A   5     -26.894  59.944   4.380  1.00  0.00           C  
ATOM    134  O4'  DT A   5     -27.547  60.808   3.460  8.00  0.00           O  
ATOM    135  C3'  DT A   5     -27.654  58.645   4.450  1.00  0.00           C  
ATOM    136  O3'  DT A   5     -28.646  58.633   5.430  2.00  0.00           O  
ATOM    137  C2'  DT A   5     -28.374  58.681   3.110  9.00  0.00           C  
ATOM    138  C1'  DT A   5     -28.687  60.184   2.990  8.00  0.00           C  
ATOM    139  N1   DT A   5     -29.094  60.563   1.650  6.00  0.00           N  
ATOM    140  C2   DT A   5     -30.244  61.451   1.560  8.00  0.00           C  
ATOM    141  O2   DT A   5     -30.736  61.967   2.580  3.00  0.00           O  
ATOM    142  N3   DT A   5     -30.718  61.753   0.320  4.00  0.00           N  
ATOM    143  C4   DT A   5     -30.260  61.192  -0.830  0.00  0.00           C  
ATOM    144  O4   DT A   5     -30.813  61.512  -1.880  6.00  0.00           O  
ATOM    145  C5   DT A   5     -29.226  60.188  -0.690  5.00  0.00           C  
ATOM    146  C6   DT A   5     -28.646  59.972   0.470  4.00  0.00           C  
ATOM    147  C7   DT A   5     -28.732  59.433  -1.880  7.00  0.00           C  
ATOM    148  OP1  DT A   5     -22.826  58.653   3.370  8.00  0.00           O  
ATOM    149  OP2  DT A   5     -23.650  57.969   1.200  9.00  0.00           O1-
ATOM    150  H3   DT A   5     -31.488  62.404   0.260  5.00  0.00           H  
ATOM    151  H6   DT A   5     -27.859  59.275   0.530  5.00  0.00           H  
ATOM    152  H1'  DT A   5     -29.470  60.546   3.670  8.00  0.00           H  
ATOM    153  H2'  DT A   5     -27.757  58.282   2.340  2.00  0.00           H  
ATOM    154  H3'  DT A   5     -27.057  57.656   4.590  4.00  0.00           H  
ATOM    155  H4'  DT A   5     -27.041  60.522   5.320  4.00  0.00           H  
ATOM    156  H5'  DT A   5     -25.028  60.678   3.710  2.00  0.00           H  
ATOM    157  H71  DT A   5     -28.517  60.174  -2.680  7.00  0.00           H  
ATOM    158  H72  DT A   5     -27.828  58.836  -1.710  0.00  0.00           H  
ATOM    159  H73  DT A   5     -29.562  58.680  -2.210  7.00  0.00           H  
ATOM    160 H2''  DT A   5     -29.323  58.095   3.190  1.00  0.00           H  
ATOM    161 H5''  DT A   5     -24.928  59.373   4.890  2.00  0.00           H  
ATOM    162  P    DA A   6     -28.727  57.575   6.600  2.00  0.00           P  
ATOM    163  C5'  DA A   6     -30.090  59.185   8.160  2.00  0.00           C  
ATOM    164  O5'  DA A   6     -30.053  57.935   7.450  5.00  0.00           O  
ATOM    165  C4'  DA A   6     -31.511  59.698   8.190  6.00  0.00           C  
ATOM    166  O4'  DA A   6     -31.954  60.232   6.970  1.00  0.00           O  
ATOM    167  C3'  DA A   6     -32.652  58.829   8.710  5.00  0.00           C  
ATOM    168  O3'  DA A   6     -33.586  59.589   9.370  4.00  0.00           O  
ATOM    169  C2'  DA A   6     -33.192  58.240   7.420  3.00  0.00           C  
ATOM    170  C1'  DA A   6     -33.095  59.469   6.510  1.00  0.00           C  
ATOM    171  N1   DA A   6     -34.427  60.949   1.810  9.00  0.00           N  
ATOM    172  C2   DA A   6     -34.904  61.241   3.020  4.00  0.00           C  
ATOM    173  N3   DA A   6     -34.433  60.790   4.210  8.00  0.00           N  
ATOM    174  C4   DA A   6     -33.496  59.828   4.070  9.00  0.00           C  
ATOM    175  C5   DA A   6     -33.033  59.341   2.910  4.00  0.00           C  
ATOM    176  C6   DA A   6     -33.542  59.962   1.730  7.00  0.00           C  
ATOM    177  N6   DA A   6     -33.243  59.602   0.510  2.00  0.00           N  
ATOM    178  N7   DA A   6     -32.022  58.370   3.150  1.00  0.00           N  
ATOM    179  C8   DA A   6     -31.934  58.290   4.470  4.00  0.00           C  
ATOM    180  N9   DA A   6     -32.872  59.162   5.070  0.00  0.00           N  
ATOM    181  OP1  DA A   6     -27.547  57.735   7.450  4.00  0.00           O  
ATOM    182  OP2  DA A   6     -28.951  56.219   6.080  4.00  0.00           O1-
ATOM    183  H2   DA A   6     -35.651  62.048   3.110  0.00  0.00           H  
ATOM    184  H8   DA A   6     -31.236  57.666   5.030  0.00  0.00           H  
ATOM    185  H1'  DA A   6     -33.976  60.023   6.660  2.00  0.00           H  
ATOM    186  H2'  DA A   6     -32.512  57.494   7.020  5.00  0.00           H  
ATOM    187  H3'  DA A   6     -32.354  58.087   9.340  7.00  0.00           H  
ATOM    188  H4'  DA A   6     -31.489  60.561   8.850  6.00  0.00           H  
ATOM    189  H5'  DA A   6     -29.434  59.952   7.750  0.00  0.00           H  
ATOM    190  H61  DA A   6     -33.589  60.245  -0.250  0.00  0.00           H  
ATOM    191  H62  DA A   6     -32.597  58.812   0.420  8.00  0.00           H  
ATOM    192 H2''  DA A   6     -34.228  57.795   7.440  2.00  0.00           H  
ATOM    193 H5''  DA A   6     -29.785  59.011   9.190  3.00  0.00           H  
ATOM    194  P    DG A   7     -34.959  59.158  10.030  5.00  0.00           P  
ATOM    195  C5'  DG A   7     -36.681  60.061   8.230  4.00  0.00           C  
ATOM    196  O5'  DG A   7     -35.966  58.988   8.820  1.00  0.00           O  
ATOM    197  C4'  DG A   7     -37.674  59.612   7.170  2.00  0.00           C  
ATOM    198  O4'  DG A   7     -36.943  59.410   6.000  2.00  0.00           O  
ATOM    199  C3'  DG A   7     -38.411  58.317   7.400  8.00  0.00           C  
ATOM    200  O3'  DG A   7     -39.796  58.519   7.100  4.00  0.00           O  
ATOM    201  C2'  DG A   7     -37.752  57.293   6.450  0.00  0.00           C  
ATOM    202  C1'  DG A   7     -37.592  58.365   5.320  9.00  0.00           C  
ATOM    203  N1   DG A   7     -36.706  57.966   0.190  6.00  0.00           N  
ATOM    204  C2   DG A   7     -37.581  58.790   0.880  6.00  0.00           C  
ATOM    205  N2   DG A   7     -38.465  59.338   0.210  8.00  0.00           N  
ATOM    206  N3   DG A   7     -37.694  58.825   2.210  9.00  0.00           N  
ATOM    207  C4   DG A   7     -36.851  57.992   2.840  6.00  0.00           C  
ATOM    208  C5   DG A   7     -35.846  57.244   2.330  0.00  0.00           C  
ATOM    209  C6   DG A   7     -35.773  57.193   0.900  2.00  0.00           C  
ATOM    210  O6   DG A   7     -34.953  56.661   0.210  5.00  0.00           O  
ATOM    211  N7   DG A   7     -35.053  56.618   3.320  2.00  0.00           N  
ATOM    212  C8   DG A   7     -35.569  57.128   4.390  6.00  0.00           C  
ATOM    213  N9   DG A   7     -36.736  57.881   4.210  2.00  0.00           N  
ATOM    214  OP1  DG A   7     -35.426  60.267  10.910  3.00  0.00           O  
ATOM    215  OP2  DG A   7     -34.821  57.794  10.650  1.00  0.00           O1-
ATOM    216  H1   DG A   7     -36.581  57.968  -0.810  6.00  0.00           H  
ATOM    217  H8   DG A   7     -35.225  56.906   5.410  2.00  0.00           H  
ATOM    218  H1'  DG A   7     -38.587  58.754   4.880  6.00  0.00           H  
ATOM    219  H2'  DG A   7     -36.801  56.957   6.870  8.00  0.00           H  
ATOM    220  H21  DG A   7     -38.460  59.227  -0.720  1.00  0.00           H  
ATOM    221  H3'  DG A   7     -38.326  58.099   8.430  3.00  0.00           H  
ATOM    222  H22  DG A   7     -39.123  59.908   0.710  3.00  0.00           H  
ATOM    223  H4'  DG A   7     -38.431  60.445   7.090  5.00  0.00           H  
ATOM    224  H5'  DG A   7     -36.017  60.854   7.880  6.00  0.00           H  
ATOM    225 H2''  DG A   7     -38.346  56.478   6.020  6.00  0.00           H  
ATOM    226 H5''  DG A   7     -37.275  60.437   9.110  6.00  0.00           H  
ATOM    227  P    DG A   8     -40.980  57.691   7.720  0.00  0.00           P  
ATOM    228  C5'  DG A   8     -42.089  56.656   5.570  7.00  0.00           C  
ATOM    229  O5'  DG A   8     -41.050  56.564   6.590  4.00  0.00           O  
ATOM    230  C4'  DG A   8     -41.740  57.497   4.350  2.00  0.00           C  
ATOM    231  O4'  DG A   8     -40.442  57.133   3.800  3.00  0.00           O  
ATOM    232  C3'  DG A   8     -42.729  57.268   3.180  6.00  0.00           C  
ATOM    233  O3'  DG A   8     -42.953  58.517   2.530  1.00  0.00           O  
ATOM    234  C2'  DG A   8     -41.992  56.208   2.250  6.00  0.00           C  
ATOM    235  C1'  DG A   8     -40.563  56.799   2.420  5.00  0.00           C  
ATOM    236  N1   DG A   8     -38.137  54.861  -1.550  1.00  0.00           N  
ATOM    237  C2   DG A   8     -39.173  55.681  -1.500  2.00  0.00           C  
ATOM    238  N2   DG A   8     -39.548  56.158  -2.640  3.00  0.00           N  
ATOM    239  N3   DG A   8     -39.842  55.994  -0.380  3.00  0.00           N  
ATOM    240  C4   DG A   8     -39.214  55.542   0.700  7.00  0.00           C  
ATOM    241  C5   DG A   8     -38.105  54.692   0.790  7.00  0.00           C  
ATOM    242  C6   DG A   8     -37.528  54.344  -0.410  7.00  0.00           C  
ATOM    243  O6   DG A   8     -36.557  53.646  -0.720  8.00  0.00           O  
ATOM    244  N7   DG A   8     -37.854  54.377   2.130  2.00  0.00           N  
ATOM    245  C8   DG A   8     -38.788  55.038   2.850  2.00  0.00           C  
ATOM    246  N9   DG A   8     -39.533  55.827   2.020  8.00  0.00           N  
ATOM    247  OP1  DG A   8     -42.225  58.563   7.710  2.00  0.00           O  
ATOM    248  OP2  DG A   8     -40.684  57.019   8.980  8.00  0.00           O1-
ATOM    249  H1   DG A   8     -37.795  54.678  -2.440  9.00  0.00           H  
ATOM    250  H8   DG A   8     -38.947  55.087   3.960  1.00  0.00           H  
ATOM    251  H1'  DG A   8     -40.387  57.650   1.830  5.00  0.00           H  
ATOM    252  H2'  DG A   8     -42.207  55.251   2.800  4.00  0.00           H  
ATOM    253  H21  DG A   8     -38.970  55.890  -3.330  3.00  0.00           H  
ATOM    254  H3'  DG A   8     -43.624  56.800   3.540  7.00  0.00           H  
ATOM    255  H22  DG A   8     -40.497  56.416  -2.840  5.00  0.00           H  
ATOM    256  H4'  DG A   8     -41.752  58.557   4.670  9.00  0.00           H  
ATOM    257  H5'  DG A   8     -42.968  56.911   5.990  8.00  0.00           H  
ATOM    258 H2''  DG A   8     -42.378  56.174   1.210  2.00  0.00           H  
ATOM    259 H5''  DG A   8     -42.265  55.648   5.160  4.00  0.00           H  
ATOM    260  P    DG A   9     -44.321  58.913   1.770  4.00  0.00           P  
ATOM    261  C5'  DG A   9     -45.231  56.879   0.250  5.00  0.00           C  
ATOM    262  O5'  DG A   9     -44.317  57.946   0.420  2.00  0.00           O  
ATOM    263  C4'  DG A   9     -44.907  55.783  -0.810  7.00  0.00           C  
ATOM    264  O4'  DG A   9     -43.524  55.425  -0.870  3.00  0.00           O  
ATOM    265  C3'  DG A   9     -45.867  54.571  -0.760  3.00  0.00           C  
ATOM    266  O3'  DG A   9     -46.307  54.124  -2.010  5.00  0.00           O  
ATOM    267  C2'  DG A   9     -44.839  53.654  -0.220  7.00  0.00           C  
ATOM    268  C1'  DG A   9     -43.578  54.052  -1.040  0.00  0.00           C  
ATOM    269  N1   DG A   9     -39.442  51.565  -2.920  9.00  0.00           N  
ATOM    270  C2   DG A   9     -40.324  52.351  -3.570  6.00  0.00           C  
ATOM    271  N2   DG A   9     -40.099  52.663  -4.830  9.00  0.00           N  
ATOM    272  N3   DG A   9     -41.364  53.012  -2.990  0.00  0.00           N  
ATOM    273  C4   DG A   9     -41.359  52.917  -1.590  5.00  0.00           C  
ATOM    274  C5   DG A   9     -40.493  52.106  -0.870  0.00  0.00           C  
ATOM    275  C6   DG A   9     -39.482  51.413  -1.540  8.00  0.00           C  
ATOM    276  O6   DG A   9     -38.621  50.651  -1.170  4.00  0.00           O  
ATOM    277  N7   DG A   9     -40.744  52.249   0.500  7.00  0.00           N  
ATOM    278  C8   DG A   9     -41.776  53.045   0.550  3.00  0.00           C  
ATOM    279  N9   DG A   9     -42.277  53.421  -0.680  0.00  0.00           N  
ATOM    280  OP1  DG A   9     -44.267  60.334   1.400  4.00  0.00           O  
ATOM    281  OP2  DG A   9     -45.401  58.462   2.650  8.00  0.00           O1-
ATOM    282  H1   DG A   9     -38.602  51.190  -3.390  7.00  0.00           H  
ATOM    283  H8   DG A   9     -42.293  53.325   1.470  7.00  0.00           H  
ATOM    284  H1'  DG A   9     -43.712  53.691  -2.000  7.00  0.00           H  
ATOM    285  H2'  DG A   9     -44.702  54.068   0.800  0.00  0.00           H  
ATOM    286  H21  DG A   9     -39.305  52.342  -5.290  3.00  0.00           H  
ATOM    287  H3'  DG A   9     -46.719  54.658  -0.100  8.00  0.00           H  
ATOM    288  H22  DG A   9     -40.527  53.545  -5.190  2.00  0.00           H  
ATOM    289  H4'  DG A   9     -45.211  56.142  -1.800  8.00  0.00           H  
ATOM    290  H5'  DG A   9     -46.138  57.368  -0.040  1.00  0.00           H  
ATOM    291 H2''  DG A   9     -45.078  52.598  -0.250  5.00  0.00           H  
ATOM    292 H5''  DG A   9     -45.184  56.345   1.210  9.00  0.00           H  
ATOM    293  P    DT A  10     -47.482  54.867  -2.810  4.00  0.00           P  
ATOM    294  C5'  DT A  10     -45.938  56.045  -4.580  9.00  0.00           C  
ATOM    295  O5'  DT A  10     -46.831  54.981  -4.250  4.00  0.00           O  
ATOM    296  C4'  DT A  10     -45.178  55.841  -5.860  4.00  0.00           C  
ATOM    297  O4'  DT A  10     -44.086  54.995  -5.550  1.00  0.00           O  
ATOM    298  C3'  DT A  10     -46.002  55.332  -7.010  9.00  0.00           C  
ATOM    299  O3'  DT A  10     -45.457  55.800  -8.260  4.00  0.00           O  
ATOM    300  C2'  DT A  10     -45.715  53.809  -6.840  3.00  0.00           C  
ATOM    301  C1'  DT A  10     -44.338  53.762  -6.240  6.00  0.00           C  
ATOM    302  N1   DT A  10     -44.156  52.531  -5.430  7.00  0.00           N  
ATOM    303  C2   DT A  10     -43.226  51.562  -5.970  4.00  0.00           C  
ATOM    304  O2   DT A  10     -42.727  51.505  -7.140  4.00  0.00           O  
ATOM    305  N3   DT A  10     -42.918  50.531  -5.080  8.00  0.00           N  
ATOM    306  C4   DT A  10     -43.674  50.203  -3.970  4.00  0.00           C  
ATOM    307  O4   DT A  10     -43.372  49.181  -3.310  8.00  0.00           O  
ATOM    308  C5   DT A  10     -44.769  51.139  -3.680  7.00  0.00           C  
ATOM    309  C6   DT A  10     -44.979  52.285  -4.360  5.00  0.00           C  
ATOM    310  C7   DT A  10     -45.649  50.896  -2.460  5.00  0.00           C  
ATOM    311  OP1  DT A  10     -47.698  56.220  -2.250  0.00  0.00           O  
ATOM    312  OP2  DT A  10     -48.620  53.946  -2.930  1.00  0.00           O1-
ATOM    313  H3   DT A  10     -42.154  49.850  -5.420  9.00  0.00           H  
ATOM    314  H6   DT A  10     -45.799  52.997  -4.030  1.00  0.00           H  
ATOM    315  H1'  DT A  10     -43.619  53.622  -6.960  2.00  0.00           H  
ATOM    316  H2'  DT A  10     -46.460  53.433  -6.190  6.00  0.00           H  
ATOM    317  H3'  DT A  10     -47.134  55.547  -6.890  8.00  0.00           H  
ATOM    318  H4'  DT A  10     -44.738  56.734  -6.340  4.00  0.00           H  
ATOM    319  H5'  DT A  10     -45.186  56.218  -3.850  1.00  0.00           H  
ATOM    320  H71  DT A  10     -46.176  49.979  -2.630  7.00  0.00           H  
ATOM    321  H72  DT A  10     -45.102  50.701  -1.520  2.00  0.00           H  
ATOM    322  H73  DT A  10     -46.422  51.682  -2.440  5.00  0.00           H  
ATOM    323 H2''  DT A  10     -45.828  53.324  -7.790  5.00  0.00           H  
ATOM    324 H5''  DT A  10     -46.557  56.972  -4.720  2.00  0.00           H  
ATOM    325  P    DT A  11     -46.311  55.584  -9.600  8.00  0.00           P  
ATOM    326  C5'  DT A  11     -44.688  54.024 -10.890  9.00  0.00           C  
ATOM    327  O5'  DT A  11     -45.902  54.178 -10.210  5.00  0.00           O  
ATOM    328  C4'  DT A  11     -44.176  52.641 -11.300  6.00  0.00           C  
ATOM    329  O4'  DT A  11     -43.894  52.035 -10.040  3.00  0.00           O  
ATOM    330  C3'  DT A  11     -45.256  51.747 -11.850  6.00  0.00           C  
ATOM    331  O3'  DT A  11     -45.310  51.971 -13.300  4.00  0.00           O  
ATOM    332  C2'  DT A  11     -44.763  50.365 -11.400  0.00  0.00           C  
ATOM    333  C1'  DT A  11     -43.880  50.662 -10.230  2.00  0.00           C  
ATOM    334  N1   DT A  11     -44.241  49.927  -8.990  7.00  0.00           N  
ATOM    335  C2   DT A  11     -43.456  48.820  -8.700  6.00  0.00           C  
ATOM    336  O2   DT A  11     -42.494  48.399  -9.340  5.00  0.00           O  
ATOM    337  N3   DT A  11     -43.807  48.134  -7.540  2.00  0.00           N  
ATOM    338  C4   DT A  11     -44.939  48.378  -6.790  6.00  0.00           C  
ATOM    339  O4   DT A  11     -45.148  47.751  -5.720  9.00  0.00           O  
ATOM    340  C5   DT A  11     -45.788  49.493  -7.300  2.00  0.00           C  
ATOM    341  C6   DT A  11     -45.366  50.255  -8.310  8.00  0.00           C  
ATOM    342  C7   DT A  11     -46.977  49.972  -6.500  4.00  0.00           C  
ATOM    343  OP1  DT A  11     -45.911  56.683 -10.590  1.00  0.00           O  
ATOM    344  OP2  DT A  11     -47.735  55.360  -9.230  2.00  0.00           O1-
ATOM    345  H3   DT A  11     -43.295  47.309  -7.310  2.00  0.00           H  
ATOM    346  H6   DT A  11     -45.918  51.096  -8.650  0.00  0.00           H  
ATOM    347  H1'  DT A  11     -42.889  50.322 -10.490  4.00  0.00           H  
ATOM    348  H2'  DT A  11     -45.474  49.747 -11.040  5.00  0.00           H  
ATOM    349  H3'  DT A  11     -46.197  51.837 -11.390  0.00  0.00           H  
ATOM    350  H4'  DT A  11     -43.298  52.700 -11.940  9.00  0.00           H  
ATOM    351  H5'  DT A  11     -43.890  54.490 -10.250  9.00  0.00           H  
ATOM    352  H71  DT A  11     -47.710  49.126  -6.370  3.00  0.00           H  
ATOM    353  H72  DT A  11     -46.691  50.152  -5.490  8.00  0.00           H  
ATOM    354  H73  DT A  11     -47.465  50.834  -7.000  3.00  0.00           H  
ATOM    355 H2''  DT A  11     -44.203  49.868 -12.180  2.00  0.00           H  
ATOM    356 H5''  DT A  11     -44.798  54.535 -11.890  9.00  0.00           H  
ATOM    357  P    DA A  12     -46.469  51.288 -14.120  8.00  0.00           P  
ATOM    358  C5'  DA A  12     -45.056  49.102 -14.720  9.00  0.00           C  
ATOM    359  O5'  DA A  12     -46.104  49.687 -13.970  7.00  0.00           O  
ATOM    360  C4'  DA A  12     -44.928  47.613 -14.280  9.00  0.00           C  
ATOM    361  O4'  DA A  12     -44.692  47.361 -12.810  8.00  0.00           O  
ATOM    362  C3'  DA A  12     -46.205  46.843 -14.540  0.00  0.00           C  
ATOM    363  O3'  DA A  12     -45.862  45.535 -15.110  0.00  0.00           O  
ATOM    364  C2'  DA A  12     -46.726  46.615 -13.160  7.00  0.00           C  
ATOM    365  C1'  DA A  12     -45.420  46.236 -12.440  1.00  0.00           C  
ATOM    366  N1   DA A  12     -44.230  43.544  -8.270  2.00  0.00           N  
ATOM    367  C2   DA A  12     -43.708  43.598  -9.480  5.00  0.00           C  
ATOM    368  N3   DA A  12     -44.034  44.296 -10.550  2.00  0.00           N  
ATOM    369  C4   DA A  12     -45.054  45.166 -10.220  3.00  0.00           C  
ATOM    370  C5   DA A  12     -45.565  45.357  -8.950  9.00  0.00           C  
ATOM    371  C6   DA A  12     -45.163  44.515  -7.940  7.00  0.00           C  
ATOM    372  N6   DA A  12     -45.772  44.395  -6.780  8.00  0.00           N  
ATOM    373  N7   DA A  12     -46.542  46.369  -9.020  2.00  0.00           N  
ATOM    374  C8   DA A  12     -46.499  46.860 -10.210  4.00  0.00           C  
ATOM    375  N9   DA A  12     -45.617  46.131 -10.980  1.00  0.00           N  
ATOM    376  OP1  DA A  12     -46.299  51.596 -15.530  8.00  0.00           O  
ATOM    377  OP2  DA A  12     -47.774  51.544 -13.500  6.00  0.00           O1-
ATOM    378  H2   DA A  12     -42.981  42.834  -9.740  5.00  0.00           H  
ATOM    379  H8   DA A  12     -47.111  47.692 -10.530  5.00  0.00           H  
ATOM    380  H1'  DA A  12     -45.043  45.384 -12.830  2.00  0.00           H  
ATOM    381  H2'  DA A  12     -47.057  47.519 -12.840  2.00  0.00           H  
ATOM    382  H3'  DA A  12     -46.927  47.323 -15.170  0.00  0.00           H  
ATOM    383  H4'  DA A  12     -44.140  47.211 -14.940  8.00  0.00           H  
ATOM    384  H5'  DA A  12     -44.065  49.498 -14.440  2.00  0.00           H  
ATOM    385  H61  DA A  12     -45.324  43.686  -6.190  2.00  0.00           H  
ATOM    386  H62  DA A  12     -46.367  45.127  -6.410  0.00  0.00           H  
ATOM    387 H2''  DA A  12     -47.418  45.806 -13.130  2.00  0.00           H  
ATOM    388 H5''  DA A  12     -45.343  49.099 -15.750  8.00  0.00           H  
ATOM    389  P    DG A  13     -46.662  44.829 -16.240  7.00  0.00           P  
ATOM    390  C5'  DG A  13     -46.725  42.625 -14.920  9.00  0.00           C  
ATOM    391  O5'  DG A  13     -47.457  43.647 -15.550  2.00  0.00           O  
ATOM    392  C4'  DG A  13     -46.172  41.536 -15.800  9.00  0.00           C  
ATOM    393  O4'  DG A  13     -45.772  40.408 -14.940  1.00  0.00           O  
ATOM    394  C3'  DG A  13     -47.242  41.004 -16.720  5.00  0.00           C  
ATOM    395  O3'  DG A  13     -46.705  40.377 -17.850  6.00  0.00           O  
ATOM    396  C2'  DG A  13     -47.792  39.900 -15.850  6.00  0.00           C  
ATOM    397  C1'  DG A  13     -46.536  39.299 -15.290  0.00  0.00           C  
ATOM    398  N1   DG A  13     -45.269  34.694 -13.240  5.00  0.00           N  
ATOM    399  C2   DG A  13     -44.686  35.418 -14.290  2.00  0.00           C  
ATOM    400  N2   DG A  13     -43.698  34.793 -14.820  6.00  0.00           N  
ATOM    401  N3   DG A  13     -44.981  36.659 -14.650  1.00  0.00           N  
ATOM    402  C4   DG A  13     -45.964  37.169 -13.810  6.00  0.00           C  
ATOM    403  C5   DG A  13     -46.739  36.457 -12.870  4.00  0.00           C  
ATOM    404  C6   DG A  13     -46.341  35.153 -12.510  6.00  0.00           C  
ATOM    405  O6   DG A  13     -46.783  34.430 -11.630  8.00  0.00           O  
ATOM    406  N7   DG A  13     -47.584  37.422 -12.280  0.00  0.00           N  
ATOM    407  C8   DG A  13     -47.466  38.492 -13.010  4.00  0.00           C  
ATOM    408  N9   DG A  13     -46.644  38.364 -14.090  7.00  0.00           N  
ATOM    409  OP1  DG A  13     -45.689  44.265 -17.170  7.00  0.00           O  
ATOM    410  OP2  DG A  13     -47.763  45.629 -16.760  4.00  0.00           O1-
ATOM    411  H1   DG A  13     -44.872  33.766 -13.000  8.00  0.00           H  
ATOM    412  H8   DG A  13     -47.988  39.400 -12.950  6.00  0.00           H  
ATOM    413  H1'  DG A  13     -46.007  38.721 -16.040  3.00  0.00           H  
ATOM    414  H2'  DG A  13     -48.365  40.429 -15.100  0.00  0.00           H  
ATOM    415  H21  DG A  13     -43.464  33.841 -14.570  3.00  0.00           H  
ATOM    416  H3'  DG A  13     -47.913  41.772 -17.100  3.00  0.00           H  
ATOM    417  H22  DG A  13     -43.105  35.174 -15.430  9.00  0.00           H  
ATOM    418  H4'  DG A  13     -45.281  42.014 -16.310  0.00  0.00           H  
ATOM    419  H5'  DG A  13     -47.328  42.244 -14.190  3.00  0.00           H  
ATOM    420 H2''  DG A  13     -48.283  39.120 -16.510  5.00  0.00           H  
ATOM    421 H5''  DG A  13     -45.875  43.078 -14.390  4.00  0.00           H  
ATOM    422  P    DG A  14     -47.611  40.315 -19.210  8.00  0.00           P  
ATOM    423  C5'  DG A  14     -47.563  37.724 -19.170  3.00  0.00           C  
ATOM    424  O5'  DG A  14     -47.238  38.912 -19.880  1.00  0.00           O  
ATOM    425  C4'  DG A  14     -46.899  36.373 -19.590  6.00  0.00           C  
ATOM    426  O4'  DG A  14     -47.361  35.298 -18.770  1.00  0.00           O  
ATOM    427  C3'  DG A  14     -45.421  36.495 -19.330  9.00  0.00           C  
ATOM    428  O3'  DG A  14     -44.462  36.310 -20.400  1.00  0.00           O  
ATOM    429  C2'  DG A  14     -45.021  35.429 -18.310  8.00  0.00           C  
ATOM    430  C1'  DG A  14     -46.444  35.252 -17.730  3.00  0.00           C  
ATOM    431  N1   DG A  14     -48.623  32.803 -13.830  0.00  0.00           N  
ATOM    432  C2   DG A  14     -48.950  34.017 -14.460  5.00  0.00           C  
ATOM    433  N2   DG A  14     -49.751  34.848 -13.810  9.00  0.00           N  
ATOM    434  N3   DG A  14     -48.260  34.525 -15.470  4.00  0.00           N  
ATOM    435  C4   DG A  14     -47.169  33.743 -15.860  4.00  0.00           C  
ATOM    436  C5   DG A  14     -46.829  32.491 -15.340  1.00  0.00           C  
ATOM    437  C6   DG A  14     -47.553  31.985 -14.170  5.00  0.00           C  
ATOM    438  O6   DG A  14     -47.411  30.848 -13.740  3.00  0.00           O  
ATOM    439  N7   DG A  14     -45.697  32.053 -16.060  3.00  0.00           N  
ATOM    440  C8   DG A  14     -45.469  32.978 -16.970  2.00  0.00           C  
ATOM    441  N9   DG A  14     -46.372  34.017 -16.930  0.00  0.00           N  
ATOM    442  OP1  DG A  14     -47.104  41.370 -20.110  2.00  0.00           O  
ATOM    443  OP2  DG A  14     -49.006  40.128 -18.830  0.00  0.00           O1-
ATOM    444  H1   DG A  14     -49.068  32.515 -12.970  9.00  0.00           H  
ATOM    445  H8   DG A  14     -44.649  32.866 -17.710  8.00  0.00           H  
ATOM    446  H1'  DG A  14     -46.788  35.990 -17.070  8.00  0.00           H  
ATOM    447  H2'  DG A  14     -44.670  34.587 -18.860  8.00  0.00           H  
ATOM    448  H21  DG A  14     -50.238  34.539 -12.960  8.00  0.00           H  
ATOM    449  H3'  DG A  14     -45.246  37.424 -18.880  3.00  0.00           H  
ATOM    450  H22  DG A  14     -49.801  35.776 -14.150  7.00  0.00           H  
ATOM    451  H4'  DG A  14     -47.138  36.064 -20.580  7.00  0.00           H  
ATOM    452  H5'  DG A  14     -48.618  37.491 -19.340  9.00  0.00           H  
ATOM    453 H2''  DG A  14     -44.421  35.895 -17.560  3.00  0.00           H  
ATOM    454 H5''  DG A  14     -47.414  37.913 -18.080  9.00  0.00           H  
ATOM    455  P    DG A  15     -44.784  36.452 -21.980  7.00  0.00           P  
ATOM    456  C5'  DG A  15     -44.775  33.872 -22.110  4.00  0.00           C  
ATOM    457  O5'  DG A  15     -45.443  35.091 -22.260  3.00  0.00           O  
ATOM    458  C4'  DG A  15     -45.588  32.632 -21.870  7.00  0.00           C  
ATOM    459  O4'  DG A  15     -45.978  32.440 -20.500  7.00  0.00           O  
ATOM    460  C3'  DG A  15     -46.808  32.375 -22.880  2.00  0.00           C  
ATOM    461  O3'  DG A  15     -46.832  31.068 -23.400  7.00  0.00           O  
ATOM    462  C2'  DG A  15     -47.912  32.240 -21.800  7.00  0.00           C  
ATOM    463  C1'  DG A  15     -47.158  31.624 -20.550  5.00  0.00           C  
ATOM    464  N1   DG A  15     -47.912  28.488 -16.660  7.00  0.00           N  
ATOM    465  C2   DG A  15     -46.976  28.494 -17.670  0.00  0.00           C  
ATOM    466  N2   DG A  15     -46.035  27.584 -17.580  3.00  0.00           N  
ATOM    467  N3   DG A  15     -46.917  29.393 -18.610  9.00  0.00           N  
ATOM    468  C4   DG A  15     -47.825  30.387 -18.450  7.00  0.00           C  
ATOM    469  C5   DG A  15     -48.792  30.541 -17.490  1.00  0.00           C  
ATOM    470  C6   DG A  15     -48.796  29.531 -16.470  1.00  0.00           C  
ATOM    471  O6   DG A  15     -49.455  29.426 -15.390  2.00  0.00           O  
ATOM    472  N7   DG A  15     -49.492  31.738 -17.690  0.00  0.00           N  
ATOM    473  C8   DG A  15     -48.939  32.266 -18.750  0.00  0.00           C  
ATOM    474  N9   DG A  15     -47.982  31.469 -19.320  7.00  0.00           N  
ATOM    475  OP1  DG A  15     -43.493  36.481 -22.670  7.00  0.00           O  
ATOM    476  OP2  DG A  15     -45.837  37.464 -22.140  7.00  0.00           O1-
ATOM    477  H1   DG A  15     -47.875  27.774 -16.030  5.00  0.00           H  
ATOM    478  H8   DG A  15     -49.222  33.153 -19.230  4.00  0.00           H  
ATOM    479  H1'  DG A  15     -46.907  30.608 -20.950  9.00  0.00           H  
ATOM    480  H2'  DG A  15     -48.419  33.117 -21.500  9.00  0.00           H  
ATOM    481  H21  DG A  15     -46.081  27.015 -16.720  7.00  0.00           H  
ATOM    482  H3'  DG A  15     -47.037  33.171 -23.670  3.00  0.00           H  
ATOM    483  H22  DG A  15     -45.319  27.510 -18.240  1.00  0.00           H  
ATOM    484  H4'  DG A  15     -44.897  31.851 -22.190  2.00  0.00           H  
ATOM    485  H5'  DG A  15     -44.111  33.994 -21.260  4.00  0.00           H  
ATOM    486 H2''  DG A  15     -48.744  31.562 -22.050  4.00  0.00           H  
ATOM    487 H5''  DG A  15     -44.176  33.812 -22.930  5.00  0.00           H  
ATOM    488  P    DT A  16     -46.568  30.765 -24.950  2.00  0.00           P  
ATOM    489  C5'  DT A  16     -47.499  28.377 -24.510  8.00  0.00           C  
ATOM    490  O5'  DT A  16     -46.444  29.193 -24.930  5.00  0.00           O  
ATOM    491  C4'  DT A  16     -47.299  26.905 -24.690  2.00  0.00           C  
ATOM    492  O4'  DT A  16     -47.325  26.495 -26.050  7.00  0.00           O  
ATOM    493  C3'  DT A  16     -46.005  26.349 -23.970  3.00  0.00           C  
ATOM    494  O3'  DT A  16     -46.363  25.219 -23.160  6.00  0.00           O  
ATOM    495  C2'  DT A  16     -45.279  25.955 -25.260  9.00  0.00           C  
ATOM    496  C1'  DT A  16     -46.377  25.456 -26.190  8.00  0.00           C  
ATOM    497  N1   DT A  16     -45.853  25.357 -27.600  8.00  0.00           N  
ATOM    498  C2   DT A  16     -46.251  24.339 -28.370  3.00  0.00           C  
ATOM    499  O2   DT A  16     -47.120  23.512 -28.050  9.00  0.00           O  
ATOM    500  N3   DT A  16     -45.731  24.277 -29.610  8.00  0.00           N  
ATOM    501  C4   DT A  16     -45.090  25.293 -30.270  7.00  0.00           C  
ATOM    502  O4   DT A  16     -44.775  25.139 -31.470  3.00  0.00           O  
ATOM    503  C5   DT A  16     -44.870  26.494 -29.520  7.00  0.00           C  
ATOM    504  C6   DT A  16     -45.291  26.493 -28.230  3.00  0.00           C  
ATOM    505  C7   DT A  16     -44.280  27.803 -30.090  7.00  0.00           C  
ATOM    506  OP1  DT A  16     -45.219  31.193 -25.410  2.00  0.00           O  
ATOM    507  OP2  DT A  16     -47.803  31.188 -25.710  0.00  0.00           O1-
ATOM    508  H3   DT A  16     -46.100  23.513 -30.110  5.00  0.00           H  
ATOM    509  H6   DT A  16     -45.157  27.306 -27.540  5.00  0.00           H  
ATOM    510  H1'  DT A  16     -46.791  24.525 -25.920  1.00  0.00           H  
ATOM    511  H2'  DT A  16     -44.825  26.851 -25.590  3.00  0.00           H  
ATOM    512  H3'  DT A  16     -45.485  27.093 -23.370  4.00  0.00           H  
ATOM    513  H4'  DT A  16     -48.186  26.426 -24.180  7.00  0.00           H  
ATOM    514  H5'  DT A  16     -48.282  28.562 -25.250  3.00  0.00           H  
ATOM    515  H71  DT A  16     -44.068  28.527 -29.260  3.00  0.00           H  
ATOM    516  H72  DT A  16     -43.301  27.541 -30.620  2.00  0.00           H  
ATOM    517  H73  DT A  16     -44.890  28.229 -30.930  1.00  0.00           H  
ATOM    518 H2''  DT A  16     -44.490  25.203 -25.180  3.00  0.00           H  
ATOM    519 H5''  DT A  16     -47.801  28.573 -23.490  3.00  0.00           H  
ATOM    520  P    DT A  17     -45.357  24.641 -22.050  2.00  0.00           P  
ATOM    521  C5'  DT A  17     -47.011  25.319 -20.140  8.00  0.00           C  
ATOM    522  O5'  DT A  17     -46.310  24.300 -20.850  5.00  0.00           O  
ATOM    523  C4'  DT A  17     -47.849  24.732 -18.950  6.00  0.00           C  
ATOM    524  O4'  DT A  17     -48.560  25.678 -18.300  8.00  0.00           O  
ATOM    525  C3'  DT A  17     -48.849  23.677 -19.320  7.00  0.00           C  
ATOM    526  O3'  DT A  17     -49.142  22.894 -18.170  4.00  0.00           O  
ATOM    527  C2'  DT A  17     -50.179  24.489 -19.540  2.00  0.00           C  
ATOM    528  C1'  DT A  17     -49.933  25.452 -18.360  4.00  0.00           C  
ATOM    529  N1   DT A  17     -50.745  26.694 -18.410  0.00  0.00           N  
ATOM    530  C2   DT A  17     -51.753  26.916 -17.420  6.00  0.00           C  
ATOM    531  O2   DT A  17     -52.056  26.072 -16.610  2.00  0.00           O  
ATOM    532  N3   DT A  17     -52.477  28.073 -17.530  8.00  0.00           N  
ATOM    533  C4   DT A  17     -52.409  29.016 -18.530  4.00  0.00           C  
ATOM    534  O4   DT A  17     -53.243  29.979 -18.500  4.00  0.00           O  
ATOM    535  C5   DT A  17     -51.350  28.742 -19.520  6.00  0.00           C  
ATOM    536  C6   DT A  17     -50.465  27.676 -19.370  7.00  0.00           C  
ATOM    537  C7   DT A  17     -51.112  29.781 -20.600  5.00  0.00           C  
ATOM    538  OP1  DT A  17     -44.359  25.631 -21.630  8.00  0.00           O  
ATOM    539  OP2  DT A  17     -44.852  23.365 -22.630  7.00  0.00           O1-
ATOM    540  H3   DT A  17     -53.049  28.237 -16.700  5.00  0.00           H  
ATOM    541  H6   DT A  17     -49.665  27.465 -20.050  0.00  0.00           H  
ATOM    542  H1'  DT A  17     -50.228  24.935 -17.550  5.00  0.00           H  
ATOM    543  H2'  DT A  17     -50.083  24.928 -20.570  8.00  0.00           H  
ATOM    544  H3'  DT A  17     -48.557  23.154 -20.170  0.00  0.00           H  
ATOM    545  H4'  DT A  17     -47.109  24.333 -18.190  4.00  0.00           H  
ATOM    546  H5'  DT A  17     -47.623  25.912 -20.830  9.00  0.00           H  
ATOM    547  H71  DT A  17     -50.376  29.390 -21.270  5.00  0.00           H  
ATOM    548  H72  DT A  17     -50.718  30.524 -20.070  7.00  0.00           H  
ATOM    549  H73  DT A  17     -52.024  30.019 -21.060  3.00  0.00           H  
ATOM    550 H2''  DT A  17     -51.018  23.822 -19.450  8.00  0.00           H  
ATOM    551 H5''  DT A  17     -46.275  26.017 -19.750  1.00  0.00           H  
ATOM    552  P    DA A  18     -48.920  21.284 -18.170  9.00  0.00           P  
ATOM    553  C5'  DA A  18     -47.667  21.654 -15.980  5.00  0.00           C  
ATOM    554  O5'  DA A  18     -48.774  21.152 -16.690  8.00  0.00           O  
ATOM    555  C4'  DA A  18     -47.811  21.556 -14.510  8.00  0.00           C  
ATOM    556  O4'  DA A  18     -48.595  22.590 -14.080  8.00  0.00           O  
ATOM    557  C3'  DA A  18     -48.405  20.273 -14.010  4.00  0.00           C  
ATOM    558  O3'  DA A  18     -47.962  19.806 -12.740  5.00  0.00           O  
ATOM    559  C2'  DA A  18     -49.792  20.738 -13.700  0.00  0.00           C  
ATOM    560  C1'  DA A  18     -49.502  22.131 -13.100  0.00  0.00           C  
ATOM    561  N1   DA A  18     -54.160  22.749 -11.180  7.00  0.00           N  
ATOM    562  C2   DA A  18     -53.223  21.801 -11.000  4.00  0.00           C  
ATOM    563  N3   DA A  18     -51.989  21.815 -11.390  8.00  0.00           N  
ATOM    564  C4   DA A  18     -51.745  22.866 -12.240  6.00  0.00           C  
ATOM    565  C5   DA A  18     -52.607  23.874 -12.550  2.00  0.00           C  
ATOM    566  C6   DA A  18     -53.856  23.744 -11.960  4.00  0.00           C  
ATOM    567  N6   DA A  18     -54.841  24.559 -11.990  0.00  0.00           N  
ATOM    568  N7   DA A  18     -52.019  24.746 -13.480  5.00  0.00           N  
ATOM    569  C8   DA A  18     -50.854  24.199 -13.710  1.00  0.00           C  
ATOM    570  N9   DA A  18     -50.630  23.091 -13.000  5.00  0.00           N  
ATOM    571  OP1  DA A  18     -47.704  20.892 -18.830  8.00  0.00           O  
ATOM    572  OP2  DA A  18     -50.190  20.677 -18.530  0.00  0.00           O1-
ATOM    573  H2   DA A  18     -53.508  21.066 -10.250  2.00  0.00           H  
ATOM    574  H8   DA A  18     -50.102  24.485 -14.460  7.00  0.00           H  
ATOM    575  H1'  DA A  18     -49.024  22.083 -12.030  6.00  0.00           H  
ATOM    576  H2'  DA A  18     -50.419  20.878 -14.570  4.00  0.00           H  
ATOM    577  H3'  DA A  18     -48.389  19.487 -14.760  7.00  0.00           H  
ATOM    578  H4'  DA A  18     -46.773  21.654 -14.150  3.00  0.00           H  
ATOM    579  H5'  DA A  18     -47.435  22.667 -16.200  0.00  0.00           H  
ATOM    580  H61  DA A  18     -55.568  24.229 -11.420  8.00  0.00           H  
ATOM    581  H62  DA A  18     -54.711  25.579 -12.170  9.00  0.00           H  
ATOM    582 H2''  DA A  18     -50.417  20.102 -13.050  5.00  0.00           H  
ATOM    583 H5''  DA A  18     -46.885  20.996 -16.180  0.00  0.00           H  
ATOM    584  P    DG A  19     -46.954  18.642 -12.630  7.00  0.00           P  
ATOM    585  C5'  DG A  19     -45.093  18.897 -14.450  8.00  0.00           C  
ATOM    586  O5'  DG A  19     -45.740  19.337 -13.270  8.00  0.00           O  
ATOM    587  C4'  DG A  19     -44.111  19.966 -14.980  3.00  0.00           C  
ATOM    588  O4'  DG A  19     -44.879  21.145 -15.190  9.00  0.00           O  
ATOM    589  C3'  DG A  19     -42.955  20.309 -14.000  6.00  0.00           C  
ATOM    590  O3'  DG A  19     -41.822  20.336 -14.940  2.00  0.00           O  
ATOM    591  C2'  DG A  19     -43.269  21.757 -13.660  9.00  0.00           C  
ATOM    592  C1'  DG A  19     -44.000  22.174 -14.960  0.00  0.00           C  
ATOM    593  N1   DG A  19     -47.234  25.493 -12.730  6.00  0.00           N  
ATOM    594  C2   DG A  19     -46.535  24.422 -12.180  5.00  0.00           C  
ATOM    595  N2   DG A  19     -46.890  24.075 -10.980  8.00  0.00           N  
ATOM    596  N3   DG A  19     -45.695  23.572 -12.770  8.00  0.00           N  
ATOM    597  C4   DG A  19     -45.493  24.038 -14.050  8.00  0.00           C  
ATOM    598  C5   DG A  19     -45.970  25.201 -14.580  2.00  0.00           C  
ATOM    599  C6   DG A  19     -46.841  26.090 -13.850  8.00  0.00           C  
ATOM    600  O6   DG A  19     -47.299  27.203 -14.140  7.00  0.00           O  
ATOM    601  N7   DG A  19     -45.590  25.323 -15.910  3.00  0.00           N  
ATOM    602  C8   DG A  19     -44.824  24.302 -16.090  9.00  0.00           C  
ATOM    603  N9   DG A  19     -44.735  23.466 -15.040  5.00  0.00           N  
ATOM    604  OP1  DG A  19     -47.396  17.511 -13.460  9.00  0.00           O  
ATOM    605  OP2  DG A  19     -46.714  18.428 -11.220  0.00  0.00           O1-
ATOM    606  H1   DG A  19     -48.067  25.865 -12.280  5.00  0.00           H  
ATOM    607  H8   DG A  19     -44.363  24.166 -17.110  7.00  0.00           H  
ATOM    608  H1'  DG A  19     -43.177  22.172 -15.720  7.00  0.00           H  
ATOM    609  H2'  DG A  19     -43.881  21.783 -12.810  3.00  0.00           H  
ATOM    610  H21  DG A  19     -47.848  24.275 -10.550  8.00  0.00           H  
ATOM    611  H3'  DG A  19     -42.920  19.634 -13.120  4.00  0.00           H  
ATOM    612  H22  DG A  19     -46.569  23.131 -10.840  5.00  0.00           H  
ATOM    613  H4'  DG A  19     -43.758  19.629 -15.950  2.00  0.00           H  
ATOM    614  H5'  DG A  19     -45.834  18.650 -15.290  6.00  0.00           H  
ATOM    615 H2''  DG A  19     -42.374  22.309 -13.500  8.00  0.00           H  
ATOM    616 H5''  DG A  19     -44.567  17.922 -14.320  9.00  0.00           H  
ATOM    617  P    DG A  20     -40.348  20.407 -14.570  2.00  0.00           P  
ATOM    618  C5'  DG A  20     -39.871  22.451 -16.180  6.00  0.00           C  
ATOM    619  O5'  DG A  20     -40.012  21.929 -14.800  1.00  0.00           O  
ATOM    620  C4'  DG A  20     -39.900  23.993 -16.180  3.00  0.00           C  
ATOM    621  O4'  DG A  20     -41.127  24.594 -15.820  6.00  0.00           O  
ATOM    622  C3'  DG A  20     -38.874  24.610 -15.190  4.00  0.00           C  
ATOM    623  O3'  DG A  20     -37.989  25.602 -15.750  2.00  0.00           O  
ATOM    624  C2'  DG A  20     -39.716  25.200 -14.090  2.00  0.00           C  
ATOM    625  C1'  DG A  20     -40.910  25.696 -14.930  9.00  0.00           C  
ATOM    626  N1   DG A  20     -44.575  29.280 -14.540  0.00  0.00           N  
ATOM    627  C2   DG A  20     -43.829  28.914 -15.610  1.00  0.00           C  
ATOM    628  N2   DG A  20     -44.016  29.521 -16.720  1.00  0.00           N  
ATOM    629  N3   DG A  20     -42.949  27.937 -15.620  7.00  0.00           N  
ATOM    630  C4   DG A  20     -42.892  27.242 -14.420  0.00  0.00           C  
ATOM    631  C5   DG A  20     -43.613  27.491 -13.300  4.00  0.00           C  
ATOM    632  C6   DG A  20     -44.534  28.629 -13.340  6.00  0.00           C  
ATOM    633  O6   DG A  20     -45.260  28.934 -12.390  9.00  0.00           O  
ATOM    634  N7   DG A  20     -43.377  26.464 -12.340  7.00  0.00           N  
ATOM    635  C8   DG A  20     -42.552  25.646 -12.940  4.00  0.00           C  
ATOM    636  N9   DG A  20     -42.168  26.080 -14.160  6.00  0.00           N  
ATOM    637  OP1  DG A  20     -39.477  19.583 -15.450  7.00  0.00           O  
ATOM    638  OP2  DG A  20     -40.266  20.237 -13.130  0.00  0.00           O1-
ATOM    639  H1   DG A  20     -45.142  30.115 -14.620  4.00  0.00           H  
ATOM    640  H8   DG A  20     -42.175  24.741 -12.420  9.00  0.00           H  
ATOM    641  H1'  DG A  20     -40.567  26.557 -15.540  3.00  0.00           H  
ATOM    642  H2'  DG A  20     -40.135  24.379 -13.560  3.00  0.00           H  
ATOM    643  H21  DG A  20     -44.744  30.259 -16.700  7.00  0.00           H  
ATOM    644  H3'  DG A  20     -38.259  23.854 -14.670  4.00  0.00           H  
ATOM    645  H22  DG A  20     -43.548  29.238 -17.500  7.00  0.00           H  
ATOM    646  H4'  DG A  20     -39.609  24.286 -17.150  7.00  0.00           H  
ATOM    647  H5'  DG A  20     -40.626  22.060 -16.770  7.00  0.00           H  
ATOM    648 H2''  DG A  20     -39.216  25.799 -13.360  3.00  0.00           H  
ATOM    649 H5''  DG A  20     -38.946  22.065 -16.600  4.00  0.00           H  
ATOM    650  P    DG A  21     -36.413  25.619 -15.430  7.00  0.00           P  
ATOM    651  C5'  DG A  21     -35.160  26.406 -13.310  2.00  0.00           C  
ATOM    652  O5'  DG A  21     -36.339  25.943 -13.930  4.00  0.00           O  
ATOM    653  C4'  DG A  21     -35.174  26.566 -11.790  3.00  0.00           C  
ATOM    654  O4'  DG A  21     -35.753  27.722 -11.300  2.00  0.00           O  
ATOM    655  C3'  DG A  21     -35.631  25.353 -11.000  2.00  0.00           C  
ATOM    656  O3'  DG A  21     -35.147  25.429  -9.680  9.00  0.00           O  
ATOM    657  C2'  DG A  21     -37.164  25.735 -10.890  9.00  0.00           C  
ATOM    658  C1'  DG A  21     -37.151  27.291 -10.990  7.00  0.00           C  
ATOM    659  N1   DG A  21     -41.864  29.168 -11.130  2.00  0.00           N  
ATOM    660  C2   DG A  21     -41.320  28.322 -10.270  2.00  0.00           C  
ATOM    661  N2   DG A  21     -41.963  27.957  -9.180  8.00  0.00           N  
ATOM    662  N3   DG A  21     -40.108  27.802 -10.420  9.00  0.00           N  
ATOM    663  C4   DG A  21     -39.484  28.240 -11.590  5.00  0.00           C  
ATOM    664  C5   DG A  21     -39.954  29.094 -12.490  6.00  0.00           C  
ATOM    665  C6   DG A  21     -41.248  29.646 -12.270  6.00  0.00           C  
ATOM    666  O6   DG A  21     -41.889  30.410 -13.040  3.00  0.00           O  
ATOM    667  N7   DG A  21     -39.016  29.280 -13.460  0.00  0.00           N  
ATOM    668  C8   DG A  21     -37.957  28.518 -13.130  2.00  0.00           C  
ATOM    669  N9   DG A  21     -38.150  27.868 -11.920  2.00  0.00           N  
ATOM    670  OP1  DG A  21     -35.807  26.729 -16.200  5.00  0.00           O  
ATOM    671  OP2  DG A  21     -35.919  24.217 -15.610  4.00  0.00           O1-
ATOM    672  H1   DG A  21     -42.815  29.391 -10.890  0.00  0.00           H  
ATOM    673  H8   DG A  21     -37.004  28.537 -13.710  0.00  0.00           H  
ATOM    674  H1'  DG A  21     -37.555  27.680 -10.030  2.00  0.00           H  
ATOM    675  H2'  DG A  21     -37.827  25.248 -11.690  3.00  0.00           H  
ATOM    676  H21  DG A  21     -42.837  28.423  -8.850  6.00  0.00           H  
ATOM    677  H3'  DG A  21     -35.547  24.384 -11.460  0.00  0.00           H  
ATOM    678  H22  DG A  21     -41.532  27.303  -8.540  0.00  0.00           H  
ATOM    679  H4'  DG A  21     -34.049  26.742 -11.500  5.00  0.00           H  
ATOM    680  H5'  DG A  21     -35.022  27.391 -13.680  3.00  0.00           H  
ATOM    681 H2''  DG A  21     -37.586  25.520  -9.880  4.00  0.00           H  
ATOM    682 H5''  DG A  21     -34.324  25.732 -13.600  8.00  0.00           H  
ATOM    683  P    DT A  22     -35.411  24.221  -8.650  9.00  0.00           P  
ATOM    684  C5'  DT A  22     -37.095  25.297  -6.750  1.00  0.00           C  
ATOM    685  O5'  DT A  22     -36.811  24.437  -7.860  9.00  0.00           O  
ATOM    686  C4'  DT A  22     -36.292  26.635  -6.720  8.00  0.00           C  
ATOM    687  O4'  DT A  22     -36.350  27.365  -7.900  5.00  0.00           O  
ATOM    688  C3'  DT A  22     -36.655  27.593  -5.680  3.00  0.00           C  
ATOM    689  O3'  DT A  22     -36.206  27.055  -4.460  9.00  0.00           O  
ATOM    690  C2'  DT A  22     -35.925  28.851  -6.130  2.00  0.00           C  
ATOM    691  C1'  DT A  22     -35.907  28.701  -7.660  2.00  0.00           C  
ATOM    692  N1   DT A  22     -36.859  29.560  -8.420  9.00  0.00           N  
ATOM    693  C2   DT A  22     -36.327  30.308  -9.490  2.00  0.00           C  
ATOM    694  O2   DT A  22     -35.127  30.372  -9.790  5.00  0.00           O  
ATOM    695  N3   DT A  22     -37.183  31.131 -10.230  3.00  0.00           N  
ATOM    696  C4   DT A  22     -38.469  31.253  -9.970  2.00  0.00           C  
ATOM    697  O4   DT A  22     -39.061  31.994 -10.700  0.00  0.00           O  
ATOM    698  C5   DT A  22     -39.012  30.631  -8.730  8.00  0.00           C  
ATOM    699  C6   DT A  22     -38.162  29.811  -8.010  0.00  0.00           C  
ATOM    700  C7   DT A  22     -40.365  30.936  -8.190  6.00  0.00           C  
ATOM    701  OP1  DT A  22     -34.243  24.160  -7.730  4.00  0.00           O  
ATOM    702  OP2  DT A  22     -35.705  23.005  -9.400  8.00  0.00           O1-
ATOM    703  H3   DT A  22     -36.734  31.648 -10.980  7.00  0.00           H  
ATOM    704  H6   DT A  22     -38.462  29.319  -7.170  9.00  0.00           H  
ATOM    705  H1'  DT A  22     -34.904  28.820  -8.050  6.00  0.00           H  
ATOM    706  H2'  DT A  22     -36.388  29.780  -5.780  8.00  0.00           H  
ATOM    707  H3'  DT A  22     -37.742  27.744  -5.790  0.00  0.00           H  
ATOM    708  H4'  DT A  22     -35.180  26.406  -6.540  9.00  0.00           H  
ATOM    709  H5'  DT A  22     -37.031  24.820  -5.740  0.00  0.00           H  
ATOM    710  H71  DT A  22     -40.549  30.417  -7.250  4.00  0.00           H  
ATOM    711  H72  DT A  22     -40.507  32.035  -8.090  6.00  0.00           H  
ATOM    712  H73  DT A  22     -41.130  30.656  -8.880  8.00  0.00           H  
ATOM    713 H2''  DT A  22     -34.912  28.671  -5.650  5.00  0.00           H  
ATOM    714 H5''  DT A  22     -38.174  25.562  -6.830  2.00  0.00           H  
ATOM    715  P    DT A  23     -37.348  26.912  -3.400  9.00  0.00           P  
ATOM    716  C5'  DT A  23     -37.577  29.404  -2.510  9.00  0.00           C  
ATOM    717  O5'  DT A  23     -37.963  28.404  -3.460  0.00  0.00           O  
ATOM    718  C4'  DT A  23     -38.365  30.676  -2.500  7.00  0.00           C  
ATOM    719  O4'  DT A  23     -37.932  31.416  -3.620  8.00  0.00           O  
ATOM    720  C3'  DT A  23     -39.879  30.544  -2.700  7.00  0.00           C  
ATOM    721  O3'  DT A  23     -40.411  31.534  -1.800  9.00  0.00           O  
ATOM    722  C2'  DT A  23     -40.004  31.045  -4.130  8.00  0.00           C  
ATOM    723  C1'  DT A  23     -39.036  32.181  -4.120  5.00  0.00           C  
ATOM    724  N1   DT A  23     -38.677  32.970  -5.340  2.00  0.00           N  
ATOM    725  C2   DT A  23     -39.617  33.927  -5.750  4.00  0.00           C  
ATOM    726  O2   DT A  23     -40.694  34.116  -5.130  8.00  0.00           O  
ATOM    727  N3   DT A  23     -39.299  34.641  -6.890  1.00  0.00           N  
ATOM    728  C4   DT A  23     -38.199  34.483  -7.680  1.00  0.00           C  
ATOM    729  O4   DT A  23     -38.200  35.145  -8.710  3.00  0.00           O  
ATOM    730  C5   DT A  23     -37.207  33.493  -7.220  6.00  0.00           C  
ATOM    731  C6   DT A  23     -37.517  32.692  -6.110  8.00  0.00           C  
ATOM    732  C7   DT A  23     -35.859  33.420  -7.900  4.00  0.00           C  
ATOM    733  OP1  DT A  23     -36.743  26.734  -2.020  8.00  0.00           O  
ATOM    734  OP2  DT A  23     -38.323  25.987  -3.950  8.00  0.00           O1-
ATOM    735  H3   DT A  23     -39.997  35.368  -7.170  9.00  0.00           H  
ATOM    736  H6   DT A  23     -36.820  31.910  -5.880  1.00  0.00           H  
ATOM    737  H1'  DT A  23     -39.386  32.806  -3.330  5.00  0.00           H  
ATOM    738  H2'  DT A  23     -39.649  30.271  -4.790  6.00  0.00           H  
ATOM    739  H3'  DT A  23     -40.330  29.576  -2.520  8.00  0.00           H  
ATOM    740  H4'  DT A  23     -38.269  31.177  -1.520  5.00  0.00           H  
ATOM    741  H5'  DT A  23     -36.516  29.597  -2.720  4.00  0.00           H  
ATOM    742  H71  DT A  23     -35.407  34.416  -7.960  7.00  0.00           H  
ATOM    743  H72  DT A  23     -35.116  32.730  -7.460  1.00  0.00           H  
ATOM    744  H73  DT A  23     -35.905  33.202  -8.960  4.00  0.00           H  
ATOM    745 H2''  DT A  23     -40.995  31.425  -4.340  3.00  0.00           H  
ATOM    746 H5''  DT A  23     -37.688  28.927  -1.570  6.00  0.00           H  
ATOM    747  P    DA A  24     -41.682  31.203  -0.900  7.00  0.00           P  
ATOM    748  C5'  DA A  24     -43.361  32.139  -2.720  1.00  0.00           C  
ATOM    749  O5'  DA A  24     -42.912  31.011  -1.910  8.00  0.00           O  
ATOM    750  C4'  DA A  24     -44.339  33.097  -2.020  7.00  0.00           C  
ATOM    751  O4'  DA A  24     -44.683  34.215  -2.820  6.00  0.00           O  
ATOM    752  C3'  DA A  24     -45.705  32.425  -1.760  0.00  0.00           C  
ATOM    753  O3'  DA A  24     -46.479  33.086  -0.800  3.00  0.00           O  
ATOM    754  C2'  DA A  24     -46.388  32.575  -3.110  2.00  0.00           C  
ATOM    755  C1'  DA A  24     -45.933  33.984  -3.440  5.00  0.00           C  
ATOM    756  N1   DA A  24     -43.627  33.059  -7.990  3.00  0.00           N  
ATOM    757  C2   DA A  24     -43.288  32.732  -6.730  3.00  0.00           C  
ATOM    758  N3   DA A  24     -43.872  33.174  -5.630  6.00  0.00           N  
ATOM    759  C4   DA A  24     -44.970  33.952  -5.870  8.00  0.00           C  
ATOM    760  C5   DA A  24     -45.423  34.395  -7.060  5.00  0.00           C  
ATOM    761  C6   DA A  24     -44.641  33.895  -8.150  3.00  0.00           C  
ATOM    762  N6   DA A  24     -44.905  34.029  -9.400  7.00  0.00           N  
ATOM    763  N7   DA A  24     -46.535  35.198  -6.890  6.00  0.00           N  
ATOM    764  C8   DA A  24     -46.754  35.188  -5.640  5.00  0.00           C  
ATOM    765  N9   DA A  24     -45.893  34.356  -4.880  3.00  0.00           N  
ATOM    766  OP1  DA A  24     -41.811  32.360  -0.080  5.00  0.00           O  
ATOM    767  OP2  DA A  24     -41.515  29.904  -0.260  0.00  0.00           O1-
ATOM    768  H2   DA A  24     -42.531  31.970  -6.680  2.00  0.00           H  
ATOM    769  H8   DA A  24     -47.631  35.626  -5.150  2.00  0.00           H  
ATOM    770  H1'  DA A  24     -46.631  34.602  -2.850  4.00  0.00           H  
ATOM    771  H2'  DA A  24     -46.048  31.804  -3.800  5.00  0.00           H  
ATOM    772  H3'  DA A  24     -45.571  31.393  -1.420  8.00  0.00           H  
ATOM    773  H4'  DA A  24     -43.983  33.445  -0.980  9.00  0.00           H  
ATOM    774  H5'  DA A  24     -43.878  31.654  -3.600  2.00  0.00           H  
ATOM    775  H61  DA A  24     -44.378  33.559 -10.150  2.00  0.00           H  
ATOM    776  H62  DA A  24     -45.777  34.402  -9.810  1.00  0.00           H  
ATOM    777 H2''  DA A  24     -47.464  32.625  -2.940  0.00  0.00           H  
ATOM    778 H5''  DA A  24     -42.469  32.645  -3.150  5.00  0.00           H  
ATOM    779  P    DG A  25     -47.785  32.604  -0.110  1.00  0.00           P  
ATOM    780  C5'  DG A  25     -49.160  34.466  -1.180  8.00  0.00           C  
ATOM    781  O5'  DG A  25     -49.058  33.083  -0.990  0.00  0.00           O  
ATOM    782  C4'  DG A  25     -49.945  34.893  -2.450  9.00  0.00           C  
ATOM    783  O4'  DG A  25     -49.207  34.371  -3.510  2.00  0.00           O  
ATOM    784  C3'  DG A  25     -51.412  34.361  -2.460  1.00  0.00           C  
ATOM    785  O3'  DG A  25     -52.187  35.302  -3.180  8.00  0.00           O  
ATOM    786  C2'  DG A  25     -51.135  33.095  -3.300  1.00  0.00           C  
ATOM    787  C1'  DG A  25     -50.025  33.519  -4.260  5.00  0.00           C  
ATOM    788  N1   DG A  25     -47.490  32.107  -8.500  6.00  0.00           N  
ATOM    789  C2   DG A  25     -48.346  33.143  -8.350  1.00  0.00           C  
ATOM    790  N2   DG A  25     -48.456  34.018  -9.350  1.00  0.00           N  
ATOM    791  N3   DG A  25     -49.059  33.343  -7.190  8.00  0.00           N  
ATOM    792  C4   DG A  25     -48.727  32.493  -6.160  6.00  0.00           C  
ATOM    793  C5   DG A  25     -47.886  31.425  -6.250  0.00  0.00           C  
ATOM    794  C6   DG A  25     -47.208  31.124  -7.500  8.00  0.00           C  
ATOM    795  O6   DG A  25     -46.454  30.195  -7.780  1.00  0.00           O  
ATOM    796  N7   DG A  25     -48.031  30.537  -5.170  3.00  0.00           N  
ATOM    797  C8   DG A  25     -48.852  31.230  -4.360  1.00  0.00           C  
ATOM    798  N9   DG A  25     -49.262  32.456  -4.900  4.00  0.00           N  
ATOM    799  OP1  DG A  25     -47.944  33.264   1.200  6.00  0.00           O  
ATOM    800  OP2  DG A  25     -47.811  31.154  -0.030  5.00  0.00           O1-
ATOM    801  H1   DG A  25     -47.207  31.758  -9.430  9.00  0.00           H  
ATOM    802  H8   DG A  25     -49.187  30.883  -3.450  0.00  0.00           H  
ATOM    803  H1'  DG A  25     -50.420  34.162  -5.030  4.00  0.00           H  
ATOM    804  H2'  DG A  25     -50.742  32.193  -2.690  4.00  0.00           H  
ATOM    805  H21  DG A  25     -47.957  33.850 -10.260  6.00  0.00           H  
ATOM    806  H3'  DG A  25     -51.678  34.060  -1.510  1.00  0.00           H  
ATOM    807  H22  DG A  25     -48.704  34.956  -9.210  1.00  0.00           H  
ATOM    808  H4'  DG A  25     -50.026  35.974  -2.450  4.00  0.00           H  
ATOM    809  H5'  DG A  25     -48.139  34.966  -1.280  6.00  0.00           H  
ATOM    810 H2''  DG A  25     -52.039  32.684  -3.790  9.00  0.00           H  
ATOM    811 H5''  DG A  25     -49.707  34.847  -0.340  6.00  0.00           H  
ATOM    812  P    DG A  26     -53.712  35.041  -3.440  4.00  0.00           P  
ATOM    813  C5'  DG A  26     -53.160  34.329  -5.890  4.00  0.00           C  
ATOM    814  O5'  DG A  26     -53.803  34.003  -4.630  8.00  0.00           O  
ATOM    815  C4'  DG A  26     -54.087  35.165  -6.790  1.00  0.00           C  
ATOM    816  O4'  DG A  26     -53.422  35.380  -8.040  7.00  0.00           O  
ATOM    817  C3'  DG A  26     -55.421  34.565  -7.280  5.00  0.00           C  
ATOM    818  O3'  DG A  26     -56.369  35.529  -7.840  1.00  0.00           O  
ATOM    819  C2'  DG A  26     -54.923  33.605  -8.410  8.00  0.00           C  
ATOM    820  C1'  DG A  26     -53.921  34.571  -9.070  4.00  0.00           C  
ATOM    821  N1   DG A  26     -50.342  30.800  -9.690  8.00  0.00           N  
ATOM    822  C2   DG A  26     -51.312  30.891  -8.820  5.00  0.00           C  
ATOM    823  N2   DG A  26     -51.120  30.212  -7.740  5.00  0.00           N  
ATOM    824  N3   DG A  26     -52.202  31.929  -8.680  7.00  0.00           N  
ATOM    825  C4   DG A  26     -52.131  32.802  -9.720  7.00  0.00           C  
ATOM    826  C5   DG A  26     -51.146  32.774 -10.690  7.00  0.00           C  
ATOM    827  C6   DG A  26     -50.158  31.713 -10.690  2.00  0.00           C  
ATOM    828  O6   DG A  26     -49.289  31.440 -11.500  2.00  0.00           O  
ATOM    829  N7   DG A  26     -51.233  33.922 -11.520  0.00  0.00           N  
ATOM    830  C8   DG A  26     -52.284  34.503 -11.050  1.00  0.00           C  
ATOM    831  N9   DG A  26     -52.891  34.025  -9.910  9.00  0.00           N  
ATOM    832  OP1  DG A  26     -54.276  36.334  -3.910  7.00  0.00           O  
ATOM    833  OP2  DG A  26     -54.396  34.454  -2.290  1.00  0.00           O1-
ATOM    834  H1   DG A  26     -49.690  30.055  -9.560  5.00  0.00           H  
ATOM    835  H8   DG A  26     -52.860  35.288 -11.510  3.00  0.00           H  
ATOM    836  H1'  DG A  26     -54.550  35.224  -9.700  7.00  0.00           H  
ATOM    837  H2'  DG A  26     -54.470  32.760  -7.920  6.00  0.00           H  
ATOM    838  H21  DG A  26     -50.425  29.469  -7.730  3.00  0.00           H  
ATOM    839  H3'  DG A  26     -55.815  33.955  -6.420  1.00  0.00           H  
ATOM    840  H22  DG A  26     -51.746  30.406  -7.010  8.00  0.00           H  
ATOM    841  H4'  DG A  26     -54.235  36.112  -6.300  9.00  0.00           H  
ATOM    842  H5'  DG A  26     -52.942  33.339  -6.360  2.00  0.00           H  
ATOM    843 H2''  DG A  26     -55.657  33.323  -9.160  4.00  0.00           H  
ATOM    844 H5''  DG A  26     -52.220  34.850  -5.710  4.00  0.00           H  
ATOM    845  P    DG A  27     -57.832  35.266  -8.380  9.00  0.00           P  
ATOM    846  C5'  DG A  27     -57.050  35.894 -10.750  6.00  0.00           C  
ATOM    847  O5'  DG A  27     -57.413  34.832  -9.900  1.00  0.00           O  
ATOM    848  C4'  DG A  27     -56.706  35.401 -12.230  1.00  0.00           C  
ATOM    849  O4'  DG A  27     -55.535  34.605 -12.100  0.00  0.00           O  
ATOM    850  C3'  DG A  27     -57.882  34.502 -12.700  9.00  0.00           C  
ATOM    851  O3'  DG A  27     -58.131  34.758 -14.090  7.00  0.00           O  
ATOM    852  C2'  DG A  27     -57.328  33.102 -12.490  8.00  0.00           C  
ATOM    853  C1'  DG A  27     -55.890  33.418 -12.810  0.00  0.00           C  
ATOM    854  N1   DG A  27     -51.484  31.148 -14.320  4.00  0.00           N  
ATOM    855  C2   DG A  27     -52.135  32.214 -14.890  2.00  0.00           C  
ATOM    856  N2   DG A  27     -51.689  32.756 -16.010  1.00  0.00           N  
ATOM    857  N3   DG A  27     -53.295  32.729 -14.380  7.00  0.00           N  
ATOM    858  C4   DG A  27     -53.746  32.087 -13.220  4.00  0.00           C  
ATOM    859  C5   DG A  27     -53.142  31.025 -12.580  9.00  0.00           C  
ATOM    860  C6   DG A  27     -51.953  30.536 -13.150  2.00  0.00           C  
ATOM    861  O6   DG A  27     -51.295  29.594 -12.660  6.00  0.00           O  
ATOM    862  N7   DG A  27     -53.891  30.633 -11.460  1.00  0.00           N  
ATOM    863  C8   DG A  27     -54.876  31.455 -11.440  3.00  0.00           C  
ATOM    864  N9   DG A  27     -54.938  32.311 -12.520  8.00  0.00           N  
ATOM    865  OP1  DG A  27     -58.535  36.544  -8.410  6.00  0.00           O  
ATOM    866  OP2  DG A  27     -58.415  34.070  -7.730  0.00  0.00           O1-
ATOM    867  H1   DG A  27     -50.689  30.669 -14.730  7.00  0.00           H  
ATOM    868  H8   DG A  27     -55.569  31.399 -10.700  4.00  0.00           H  
ATOM    869  H1'  DG A  27     -55.889  33.622 -13.860  5.00  0.00           H  
ATOM    870  H2'  DG A  27     -57.475  32.830 -11.490  0.00  0.00           H  
ATOM    871  H21  DG A  27     -50.880  32.345 -16.490  3.00  0.00           H  
ATOM    872  H3'  DG A  27     -58.759  34.585 -12.130  1.00  0.00           H  
ATOM    873  H22  DG A  27     -52.190  33.605 -16.320  4.00  0.00           H  
ATOM    874  H4'  DG A  27     -56.677  36.299 -12.900  9.00  0.00           H  
ATOM    875  H5'  DG A  27     -56.286  36.529 -10.320  8.00  0.00           H  
ATOM    876 H2''  DG A  27     -57.775  32.408 -13.200  3.00  0.00           H  
ATOM    877 H5''  DG A  27     -57.990  36.500 -10.890  8.00  0.00           H  
ATOM    878  P    DT A  28     -59.568  34.783 -14.730  1.00  0.00           P  
ATOM    879  C5'  DT A  28     -60.911  33.041 -16.140  5.00  0.00           C  
ATOM    880  O5'  DT A  28     -60.039  33.340 -15.100  3.00  0.00           O  
ATOM    881  C4'  DT A  28     -60.293  32.179 -17.220  5.00  0.00           C  
ATOM    882  O4'  DT A  28     -59.096  32.798 -17.700  4.00  0.00           O  
ATOM    883  C3'  DT A  28     -59.991  30.790 -16.670  3.00  0.00           C  
ATOM    884  O3'  DT A  28     -60.225  29.766 -17.620  2.00  0.00           O  
ATOM    885  C2'  DT A  28     -58.438  30.816 -16.470  3.00  0.00           C  
ATOM    886  C1'  DT A  28     -58.107  31.732 -17.730  5.00  0.00           C  
ATOM    887  N1   DT A  28     -56.760  32.390 -17.750  3.00  0.00           N  
ATOM    888  C2   DT A  28     -55.865  31.758 -18.640  2.00  0.00           C  
ATOM    889  O2   DT A  28     -56.098  30.878 -19.420  7.00  0.00           O  
ATOM    890  N3   DT A  28     -54.650  32.406 -18.790  3.00  0.00           N  
ATOM    891  C4   DT A  28     -54.242  33.564 -18.150  8.00  0.00           C  
ATOM    892  O4   DT A  28     -53.182  34.113 -18.360  9.00  0.00           O  
ATOM    893  C5   DT A  28     -55.265  34.110 -17.240  2.00  0.00           C  
ATOM    894  C6   DT A  28     -56.455  33.518 -17.030  6.00  0.00           C  
ATOM    895  C7   DT A  28     -55.016  35.295 -16.320  4.00  0.00           C  
ATOM    896  OP1  DT A  28     -59.494  35.644 -15.960  3.00  0.00           O  
ATOM    897  OP2  DT A  28     -60.506  35.167 -13.630  4.00  0.00           O1-
ATOM    898  H3   DT A  28     -53.944  31.975 -19.300  0.00  0.00           H  
ATOM    899  H6   DT A  28     -57.190  33.827 -16.260  4.00  0.00           H  
ATOM    900  H1'  DT A  28     -58.302  31.096 -18.640  4.00  0.00           H  
ATOM    901  H2'  DT A  28     -58.208  31.442 -15.630  6.00  0.00           H  
ATOM    902  H3'  DT A  28     -60.466  30.563 -15.730  3.00  0.00           H  
ATOM    903  H4'  DT A  28     -61.090  31.991 -18.030  0.00  0.00           H  
ATOM    904  H5'  DT A  28     -61.372  33.797 -16.670  8.00  0.00           H  
ATOM    905  H71  DT A  28     -54.673  34.880 -15.410  9.00  0.00           H  
ATOM    906  H72  DT A  28     -54.282  36.055 -16.770  9.00  0.00           H  
ATOM    907  H73  DT A  28     -55.903  35.873 -16.160  0.00  0.00           H  
ATOM    908 H2''  DT A  28     -58.047  29.886 -16.530  2.00  0.00           H  
ATOM    909 H5''  DT A  28     -61.814  32.343 -15.760  2.00  0.00           H  
ATOM    910  P    DT A  29     -61.577  29.068 -17.820  3.00  0.00           P  
ATOM    911  C5'  DT A  29     -62.624  27.295 -16.190  6.00  0.00           C  
ATOM    912  O5'  DT A  29     -61.695  28.381 -16.400  5.00  0.00           O  
ATOM    913  C4'  DT A  29     -62.233  26.352 -15.010  5.00  0.00           C  
ATOM    914  O4'  DT A  29     -61.008  25.729 -15.360  5.00  0.00           O  
ATOM    915  C3'  DT A  29     -62.037  27.133 -13.670  0.00  0.00           C  
ATOM    916  O3'  DT A  29     -62.371  26.265 -12.510  8.00  0.00           O  
ATOM    917  C2'  DT A  29     -60.562  27.274 -13.840  2.00  0.00           C  
ATOM    918  C1'  DT A  29     -60.026  25.940 -14.330  2.00  0.00           C  
ATOM    919  N1   DT A  29     -58.611  25.884 -14.750  8.00  0.00           N  
ATOM    920  C2   DT A  29     -57.729  24.949 -14.150  7.00  0.00           C  
ATOM    921  O2   DT A  29     -57.931  24.123 -13.240  6.00  0.00           O  
ATOM    922  N3   DT A  29     -56.417  25.053 -14.530  3.00  0.00           N  
ATOM    923  C4   DT A  29     -55.947  25.736 -15.590  4.00  0.00           C  
ATOM    924  O4   DT A  29     -54.780  25.507 -15.970  7.00  0.00           O  
ATOM    925  C5   DT A  29     -56.928  26.618 -16.350  8.00  0.00           C  
ATOM    926  C6   DT A  29     -58.206  26.609 -15.810  4.00  0.00           C  
ATOM    927  C7   DT A  29     -56.477  27.433 -17.540  3.00  0.00           C  
ATOM    928  OP1  DT A  29     -61.326  27.999 -18.820  6.00  0.00           O  
ATOM    929  OP2  DT A  29     -62.682  30.066 -17.950  5.00  0.00           O1-
ATOM    930  H3   DT A  29     -55.827  24.314 -14.300  0.00  0.00           H  
ATOM    931  H6   DT A  29     -58.970  27.218 -16.240  3.00  0.00           H  
ATOM    932  H1'  DT A  29     -60.228  25.236 -13.530  3.00  0.00           H  
ATOM    933  H2'  DT A  29     -60.251  28.178 -14.440  1.00  0.00           H  
ATOM    934  H3'  DT A  29     -62.482  28.113 -13.680  4.00  0.00           H  
ATOM    935  H4'  DT A  29     -63.034  25.621 -14.930  6.00  0.00           H  
ATOM    936  H5'  DT A  29     -62.746  26.745 -17.090  7.00  0.00           H  
ATOM    937  H71  DT A  29     -57.279  28.183 -17.690  9.00  0.00           H  
ATOM    938  H72  DT A  29     -55.575  27.923 -17.370  0.00  0.00           H  
ATOM    939  H73  DT A  29     -56.485  26.853 -18.420  5.00  0.00           H  
ATOM    940 H2''  DT A  29     -60.077  27.451 -12.900  7.00  0.00           H  
ATOM    941 H5''  DT A  29     -63.524  27.762 -15.920  5.00  0.00           H  
ATOM    942  P    DA A  30     -62.375  26.761 -11.000  4.00  0.00           P  
ATOM    943  C5'  DA A  30     -60.135  25.502 -10.380  2.00  0.00           C  
ATOM    944  O5'  DA A  30     -60.833  26.707 -10.600  5.00  0.00           O  
ATOM    945  C4'  DA A  30     -58.618  25.747 -10.190  3.00  0.00           C  
ATOM    946  O4'  DA A  30     -58.171  26.478 -11.300  2.00  0.00           O  
ATOM    947  C3'  DA A  30     -58.120  26.648  -9.000  6.00  0.00           C  
ATOM    948  O3'  DA A  30     -57.010  26.035  -8.310  3.00  0.00           O  
ATOM    949  C2'  DA A  30     -57.611  27.885  -9.740  4.00  0.00           C  
ATOM    950  C1'  DA A  30     -57.109  27.284 -11.010  0.00  0.00           C  
ATOM    951  N1   DA A  30     -53.917  28.566 -14.870  0.00  0.00           N  
ATOM    952  C2   DA A  30     -53.830  27.710 -13.860  7.00  0.00           C  
ATOM    953  N3   DA A  30     -54.645  27.468 -12.840  3.00  0.00           N  
ATOM    954  C4   DA A  30     -55.741  28.249 -12.860  5.00  0.00           C  
ATOM    955  C5   DA A  30     -55.931  29.250 -13.780  8.00  0.00           C  
ATOM    956  C6   DA A  30     -54.961  29.302 -14.810  3.00  0.00           C  
ATOM    957  N6   DA A  30     -55.013  30.081 -15.880  0.00  0.00           N  
ATOM    958  N7   DA A  30     -57.149  29.941 -13.540  3.00  0.00           N  
ATOM    959  C8   DA A  30     -57.685  29.312 -12.500  5.00  0.00           C  
ATOM    960  N9   DA A  30     -56.849  28.285 -12.030  4.00  0.00           N  
ATOM    961  OP1  DA A  30     -63.117  25.726 -10.250  2.00  0.00           O  
ATOM    962  OP2  DA A  30     -62.770  28.160 -10.900  5.00  0.00           O1-
ATOM    963  H2   DA A  30     -52.982  27.018 -13.890  3.00  0.00           H  
ATOM    964  H8   DA A  30     -58.580  29.736 -11.950  8.00  0.00           H  
ATOM    965  H1'  DA A  30     -56.154  26.693 -10.780  6.00  0.00           H  
ATOM    966  H2'  DA A  30     -58.310  28.663  -9.910  8.00  0.00           H  
ATOM    967  H3'  DA A  30     -58.951  26.983  -8.370  9.00  0.00           H  
ATOM    968  H4'  DA A  30     -58.054  24.848 -10.190  2.00  0.00           H  
ATOM    969  H5'  DA A  30     -60.231  24.813 -11.170  0.00  0.00           H  
ATOM    970  H61  DA A  30     -54.347  30.038 -16.600  4.00  0.00           H  
ATOM    971  H62  DA A  30     -55.588  30.929 -15.740  5.00  0.00           H  
ATOM    972 H2''  DA A  30     -56.761  28.344  -9.210  8.00  0.00           H  
ATOM    973 H5''  DA A  30     -60.533  24.986  -9.530  8.00  0.00           H  
ATOM    974  P    DG A  31     -57.285  25.177  -6.990  4.00  0.00           P  
ATOM    975  C5'  DG A  31     -54.895  24.144  -7.430  9.00  0.00           C  
ATOM    976  O5'  DG A  31     -55.837  24.770  -6.520  9.00  0.00           O  
ATOM    977  C4'  DG A  31     -53.974  23.200  -6.730  4.00  0.00           C  
ATOM    978  O4'  DG A  31     -53.002  22.967  -7.680  8.00  0.00           O  
ATOM    979  C3'  DG A  31     -53.277  23.815  -5.530  1.00  0.00           C  
ATOM    980  O3'  DG A  31     -52.793  22.871  -4.640  0.00  0.00           O  
ATOM    981  C2'  DG A  31     -52.211  24.669  -6.280  6.00  0.00           C  
ATOM    982  C1'  DG A  31     -51.799  23.656  -7.400  9.00  0.00           C  
ATOM    983  N1   DG A  31     -51.668  27.367 -11.040  8.00  0.00           N  
ATOM    984  C2   DG A  31     -52.520  27.200  -9.980  1.00  0.00           C  
ATOM    985  N2   DG A  31     -53.515  28.043  -9.860  9.00  0.00           N  
ATOM    986  N3   DG A  31     -52.501  26.180  -9.110  2.00  0.00           N  
ATOM    987  C4   DG A  31     -51.449  25.366  -9.350  5.00  0.00           C  
ATOM    988  C5   DG A  31     -50.522  25.458 -10.340  4.00  0.00           C  
ATOM    989  C6   DG A  31     -50.594  26.557 -11.310  5.00  0.00           C  
ATOM    990  O6   DG A  31     -49.868  26.798 -12.270  0.00  0.00           O  
ATOM    991  N7   DG A  31     -49.638  24.391 -10.250  5.00  0.00           N  
ATOM    992  C8   DG A  31     -50.067  23.686  -9.240  7.00  0.00           C  
ATOM    993  N9   DG A  31     -51.189  24.219  -8.640  4.00  0.00           N  
ATOM    994  OP1  DG A  31     -58.066  23.968  -7.380  3.00  0.00           O  
ATOM    995  OP2  DG A  31     -57.733  25.995  -5.850  3.00  0.00           O1-
ATOM    996  H1   DG A  31     -51.763  28.147 -11.680  8.00  0.00           H  
ATOM    997  H8   DG A  31     -49.660  22.752  -8.910  9.00  0.00           H  
ATOM    998  H1'  DG A  31     -51.115  22.960  -6.870  0.00  0.00           H  
ATOM    999  H2'  DG A  31     -52.734  25.514  -6.580  6.00  0.00           H  
ATOM   1000  H21  DG A  31     -53.578  28.796 -10.560  0.00  0.00           H  
ATOM   1001  H3'  DG A  31     -53.865  24.520  -5.070  9.00  0.00           H  
ATOM   1002  H22  DG A  31     -54.055  27.997  -9.010  2.00  0.00           H  
ATOM   1003  H4'  DG A  31     -54.455  22.283  -6.530  5.00  0.00           H  
ATOM   1004  H5'  DG A  31     -54.279  24.868  -7.910  9.00  0.00           H  
ATOM   1005 H2''  DG A  31     -51.451  25.041  -5.660  0.00  0.00           H  
ATOM   1006 H5''  DG A  31     -55.409  23.474  -8.070  8.00  0.00           H  
ATOM   1007  P    DG A  32     -52.060  23.353  -3.260  8.00  0.00           P  
ATOM   1008  C5'  DG A  32     -49.554  22.999  -3.800  2.00  0.00           C  
ATOM   1009  O5'  DG A  32     -50.660  23.893  -3.730  2.00  0.00           O  
ATOM   1010  C4'  DG A  32     -48.280  23.831  -3.960  3.00  0.00           C  
ATOM   1011  O4'  DG A  32     -48.273  24.379  -5.250  2.00  0.00           O  
ATOM   1012  C3'  DG A  32     -48.199  25.024  -2.970  4.00  0.00           C  
ATOM   1013  O3'  DG A  32     -46.896  25.145  -2.490  4.00  0.00           O  
ATOM   1014  C2'  DG A  32     -48.590  26.149  -3.950  6.00  0.00           C  
ATOM   1015  C1'  DG A  32     -47.868  25.700  -5.200  9.00  0.00           C  
ATOM   1016  N1   DG A  32     -46.129  27.242  -9.740  3.00  0.00           N  
ATOM   1017  C2   DG A  32     -45.415  26.714  -8.700  7.00  0.00           C  
ATOM   1018  N2   DG A  32     -44.276  26.165  -8.890  8.00  0.00           N  
ATOM   1019  N3   DG A  32     -45.985  26.342  -7.520  8.00  0.00           N  
ATOM   1020  C4   DG A  32     -47.275  26.744  -7.420  4.00  0.00           C  
ATOM   1021  C5   DG A  32     -48.044  27.470  -8.340  0.00  0.00           C  
ATOM   1022  C6   DG A  32     -47.395  27.732  -9.600  0.00  0.00           C  
ATOM   1023  O6   DG A  32     -47.970  28.133 -10.610  8.00  0.00           O  
ATOM   1024  N7   DG A  32     -49.369  27.700  -7.920  6.00  0.00           N  
ATOM   1025  C8   DG A  32     -49.355  27.176  -6.720  7.00  0.00           C  
ATOM   1026  N9   DG A  32     -48.234  26.457  -6.420  7.00  0.00           N  
ATOM   1027  OP1  DG A  32     -51.852  22.088  -2.500  4.00  0.00           O  
ATOM   1028  OP2  DG A  32     -52.959  24.390  -2.670  3.00  0.00           O1-
ATOM   1029  H1   DG A  32     -45.679  27.273 -10.590  2.00  0.00           H  
ATOM   1030  H8   DG A  32     -50.147  27.183  -6.100  3.00  0.00           H  
ATOM   1031  H1'  DG A  32     -46.783  25.770  -4.820  2.00  0.00           H  
ATOM   1032  H2'  DG A  32     -49.670  26.211  -4.130  1.00  0.00           H  
ATOM   1033  H21  DG A  32     -43.868  26.166  -9.850  1.00  0.00           H  
ATOM   1034  H3'  DG A  32     -48.924  25.018  -2.110  3.00  0.00           H  
ATOM   1035  H22  DG A  32     -43.860  25.791  -8.050  4.00  0.00           H  
ATOM   1036  H4'  DG A  32     -47.353  23.164  -3.900  2.00  0.00           H  
ATOM   1037  H5'  DG A  32     -49.631  22.259  -4.640  4.00  0.00           H  
ATOM   1038 H2''  DG A  32     -48.261  27.098  -3.590  0.00  0.00           H  
ATOM   1039 H5''  DG A  32     -49.619  22.558  -2.880  1.00  0.00           H  
ATOM   1040  P    DG A  33     -46.527  26.059  -1.250  7.00  0.00           P  
ATOM   1041  C5'  DG A  33     -44.232  24.958  -0.620  7.00  0.00           C  
ATOM   1042  O5'  DG A  33     -44.957  26.118  -1.010  9.00  0.00           O  
ATOM   1043  C4'  DG A  33     -42.714  25.117  -0.960  9.00  0.00           C  
ATOM   1044  O4'  DG A  33     -42.502  25.317  -2.380  0.00  0.00           O  
ATOM   1045  C3'  DG A  33     -41.915  26.267  -0.320  8.00  0.00           C  
ATOM   1046  O3'  DG A  33     -42.496  26.966   0.760  3.00  0.00           O  
ATOM   1047  C2'  DG A  33     -41.692  27.237  -1.460  2.00  0.00           C  
ATOM   1048  C1'  DG A  33     -41.589  26.370  -2.710  1.00  0.00           C  
ATOM   1049  N1   DG A  33     -44.881  29.021  -5.780  4.00  0.00           N  
ATOM   1050  C2   DG A  33     -45.027  28.519  -4.530  7.00  0.00           C  
ATOM   1051  N2   DG A  33     -46.106  28.811  -3.920  9.00  0.00           N  
ATOM   1052  N3   DG A  33     -44.173  27.949  -3.720  6.00  0.00           N  
ATOM   1053  C4   DG A  33     -43.004  27.738  -4.430  2.00  0.00           C  
ATOM   1054  C5   DG A  33     -42.742  28.110  -5.730  1.00  0.00           C  
ATOM   1055  C6   DG A  33     -43.710  28.901  -6.390  0.00  0.00           C  
ATOM   1056  O6   DG A  33     -43.633  29.300  -7.550  8.00  0.00           O  
ATOM   1057  N7   DG A  33     -41.540  27.474  -6.220  4.00  0.00           N  
ATOM   1058  C8   DG A  33     -41.097  26.897  -5.150  4.00  0.00           C  
ATOM   1059  N9   DG A  33     -41.874  26.992  -4.030  3.00  0.00           N  
ATOM   1060  OP1  DG A  33     -47.025  25.421  -0.040  4.00  0.00           O  
ATOM   1061  OP2  DG A  33     -46.845  27.484  -1.530  1.00  0.00           O1-
ATOM   1062  H1   DG A  33     -45.590  29.529  -6.350  9.00  0.00           H  
ATOM   1063  H8   DG A  33     -40.130  26.412  -5.190  9.00  0.00           H  
ATOM   1064  H1'  DG A  33     -40.626  25.896  -2.650  2.00  0.00           H  
ATOM   1065  H2'  DG A  33     -42.494  27.950  -1.410  0.00  0.00           H  
ATOM   1066  H21  DG A  33     -46.911  29.145  -4.470  3.00  0.00           H  
ATOM   1067  H3'  DG A  33     -40.917  25.882  -0.100  6.00  0.00           H  
ATOM   1068  H22  DG A  33     -46.228  28.336  -3.040  1.00  0.00           H  
ATOM   1069  H4'  DG A  33     -42.163  24.305  -0.530  6.00  0.00           H  
ATOM   1070  H5'  DG A  33     -44.603  24.033  -1.160  9.00  0.00           H  
ATOM   1071 H2''  DG A  33     -40.734  27.681  -1.300  1.00  0.00           H  
ATOM   1072 H5''  DG A  33     -44.389  24.730   0.440  4.00  0.00           H  
ATOM   1073  P    DT A  34     -42.269  26.504   2.240  3.00  0.00           P  
ATOM   1074  C5'  DT A  34     -42.513  28.092   4.400  5.00  0.00           C  
ATOM   1075  O5'  DT A  34     -42.472  27.929   3.010  8.00  0.00           O  
ATOM   1076  C4'  DT A  34     -42.200  29.531   5.000  8.00  0.00           C  
ATOM   1077  O4'  DT A  34     -42.361  29.511   6.390  1.00  0.00           O  
ATOM   1078  C3'  DT A  34     -40.752  30.015   4.800  6.00  0.00           C  
ATOM   1079  O3'  DT A  34     -40.637  31.460   4.870  5.00  0.00           O  
ATOM   1080  C2'  DT A  34     -40.006  29.482   6.040  6.00  0.00           C  
ATOM   1081  C1'  DT A  34     -41.030  29.898   7.010  0.00  0.00           C  
ATOM   1082  N1   DT A  34     -40.889  29.244   8.320  3.00  0.00           N  
ATOM   1083  C2   DT A  34     -40.994  30.015   9.510  0.00  0.00           C  
ATOM   1084  O2   DT A  34     -41.006  31.241   9.470  4.00  0.00           O  
ATOM   1085  N3   DT A  34     -41.103  29.374  10.670  3.00  0.00           N  
ATOM   1086  C4   DT A  34     -41.176  28.017  10.840  6.00  0.00           C  
ATOM   1087  O4   DT A  34     -41.363  27.597  11.990  5.00  0.00           O  
ATOM   1088  C5   DT A  34     -41.114  27.272   9.580  7.00  0.00           C  
ATOM   1089  C6   DT A  34     -41.036  27.869   8.360  2.00  0.00           C  
ATOM   1090  C7   DT A  34     -41.254  25.741   9.650  1.00  0.00           C  
ATOM   1091  OP1  DT A  34     -40.862  26.057   2.410  2.00  0.00           O  
ATOM   1092  OP2  DT A  34     -43.394  25.626   2.440  4.00  0.00           O1-
ATOM   1093  H3   DT A  34     -41.141  29.891  11.460  9.00  0.00           H  
ATOM   1094  H6   DT A  34     -41.131  27.262   7.480  0.00  0.00           H  
ATOM   1095  H1'  DT A  34     -40.936  30.992   7.120  4.00  0.00           H  
ATOM   1096  H2'  DT A  34     -39.982  28.409   6.050  9.00  0.00           H  
ATOM   1097  H3'  DT A  34     -40.338  29.674   3.860  3.00  0.00           H  
ATOM   1098  H4'  DT A  34     -42.868  30.181   4.610  7.00  0.00           H  
ATOM   1099  H5'  DT A  34     -41.673  27.504   4.820  9.00  0.00           H  
ATOM   1100  H71  DT A  34     -40.818  25.315   8.780  8.00  0.00           H  
ATOM   1101  H72  DT A  34     -40.737  25.352  10.570  9.00  0.00           H  
ATOM   1102  H73  DT A  34     -42.227  25.467   9.740  4.00  0.00           H  
ATOM   1103 H2''  DT A  34     -39.065  29.978   6.110  5.00  0.00           H  
ATOM   1104 H5''  DT A  34     -43.388  27.667   4.820  6.00  0.00           H  
ATOM   1105  P    DT A  35     -39.405  32.226   4.200  4.00  0.00           P  
ATOM   1106  C5'  DT A  35     -39.161  34.341   5.550  8.00  0.00           C  
ATOM   1107  O5'  DT A  35     -38.620  33.105   5.220  4.00  0.00           O  
ATOM   1108  C4'  DT A  35     -38.485  34.935   6.740  7.00  0.00           C  
ATOM   1109  O4'  DT A  35     -38.735  34.157   7.950  1.00  0.00           O  
ATOM   1110  C3'  DT A  35     -36.980  35.117   6.700  9.00  0.00           C  
ATOM   1111  O3'  DT A  35     -36.636  36.346   7.370  9.00  0.00           O  
ATOM   1112  C2'  DT A  35     -36.529  33.839   7.450  6.00  0.00           C  
ATOM   1113  C1'  DT A  35     -37.512  33.858   8.640  2.00  0.00           C  
ATOM   1114  N1   DT A  35     -37.544  32.558   9.340  3.00  0.00           N  
ATOM   1115  C2   DT A  35     -37.744  32.477  10.720  8.00  0.00           C  
ATOM   1116  O2   DT A  35     -37.960  33.512  11.310  0.00  0.00           O  
ATOM   1117  N3   DT A  35     -37.697  31.257  11.370  7.00  0.00           N  
ATOM   1118  C4   DT A  35     -37.721  30.052  10.800  4.00  0.00           C  
ATOM   1119  O4   DT A  35     -37.843  29.078  11.550  4.00  0.00           O  
ATOM   1120  C5   DT A  35     -37.589  30.163   9.330  0.00  0.00           C  
ATOM   1121  C6   DT A  35     -37.478  31.338   8.630  2.00  0.00           C  
ATOM   1122  C7   DT A  35     -37.284  28.878   8.550  9.00  0.00           C  
ATOM   1123  OP1  DT A  35     -39.896  33.215   3.250  7.00  0.00           O  
ATOM   1124  OP2  DT A  35     -38.486  31.174   3.730  2.00  0.00           O1-
ATOM   1125  H3   DT A  35     -37.622  31.251  12.340  5.00  0.00           H  
ATOM   1126  H6   DT A  35     -37.430  31.257   7.550  2.00  0.00           H  
ATOM   1127  H1'  DT A  35     -37.260  34.659   9.320  0.00  0.00           H  
ATOM   1128  H2'  DT A  35     -36.654  32.956   6.800  2.00  0.00           H  
ATOM   1129  H3'  DT A  35     -36.619  35.191   5.700  4.00  0.00           H  
ATOM   1130  H4'  DT A  35     -38.906  35.935   6.920  4.00  0.00           H  
ATOM   1131  H5'  DT A  35     -40.200  34.254   5.740  2.00  0.00           H  
ATOM   1132  H71  DT A  35     -37.934  28.828   7.710  2.00  0.00           H  
ATOM   1133  H72  DT A  35     -36.278  28.843   8.210  5.00  0.00           H  
ATOM   1134  H73  DT A  35     -37.515  27.985   9.140  8.00  0.00           H  
ATOM   1135 H2''  DT A  35     -35.493  33.837   7.740  7.00  0.00           H  
ATOM   1136 H5''  DT A  35     -39.133  34.948   4.640  9.00  0.00           H  
ATOM   1137  P    DA A  36     -35.185  36.874   7.730  2.00  0.00           P  
ATOM   1138  C5'  DA A  36     -35.259  37.221  10.340  4.00  0.00           C  
ATOM   1139  O5'  DA A  36     -34.851  36.411   9.260  7.00  0.00           O  
ATOM   1140  C4'  DA A  36     -34.754  36.616  11.620  5.00  0.00           C  
ATOM   1141  O4'  DA A  36     -35.428  35.364  12.030  0.00  0.00           O  
ATOM   1142  C3'  DA A  36     -33.290  36.241  11.620  7.00  0.00           C  
ATOM   1143  O3'  DA A  36     -32.344  37.278  11.920  6.00  0.00           O  
ATOM   1144  C2'  DA A  36     -33.270  35.370  12.790  7.00  0.00           C  
ATOM   1145  C1'  DA A  36     -34.550  34.584  12.770  3.00  0.00           C  
ATOM   1146  N1   DA A  36     -33.980  29.637  13.340  7.00  0.00           N  
ATOM   1147  C2   DA A  36     -33.753  30.696  14.180  9.00  0.00           C  
ATOM   1148  N3   DA A  36     -33.797  32.001  13.980  5.00  0.00           N  
ATOM   1149  C4   DA A  36     -34.022  32.156  12.610  8.00  0.00           C  
ATOM   1150  C5   DA A  36     -34.201  31.268  11.630  1.00  0.00           C  
ATOM   1151  C6   DA A  36     -34.245  29.897  12.060  8.00  0.00           C  
ATOM   1152  N6   DA A  36     -34.401  28.830  11.290  6.00  0.00           N  
ATOM   1153  N7   DA A  36     -34.349  31.936  10.380  4.00  0.00           N  
ATOM   1154  C8   DA A  36     -34.349  33.142  10.690  6.00  0.00           C  
ATOM   1155  N9   DA A  36     -34.300  33.348  12.060  3.00  0.00           N  
ATOM   1156  OP1  DA A  36     -35.214  38.368   7.720  6.00  0.00           O  
ATOM   1157  OP2  DA A  36     -34.254  36.117   6.880  8.00  0.00           O1-
ATOM   1158  H2   DA A  36     -33.574  30.455  15.250  5.00  0.00           H  
ATOM   1159  H8   DA A  36     -34.436  33.979   9.970  8.00  0.00           H  
ATOM   1160  H1'  DA A  36     -34.984  34.286  13.710  5.00  0.00           H  
ATOM   1161  H2'  DA A  36     -32.338  34.714  12.920  7.00  0.00           H  
ATOM   1162  H3'  DA A  36     -32.892  35.668  10.780  7.00  0.00           H  
ATOM   1163  H4'  DA A  36     -34.998  37.398  12.420  1.00  0.00           H  
ATOM   1164  H5'  DA A  36     -36.345  37.344  10.310  5.00  0.00           H  
ATOM   1165  H61  DA A  36     -34.328  27.903  11.750  8.00  0.00           H  
ATOM   1166  H62  DA A  36     -34.475  28.861  10.300  9.00  0.00           H  
ATOM   1167 H2''  DA A  36     -33.432  35.978  13.650  0.00  0.00           H  
ATOM   1168 H5''  DA A  36     -34.892  38.266  10.270  6.00  0.00           H  
ATOM   1169  P    DG A  37     -30.872  37.336  11.410  0.00  0.00           P  
ATOM   1170  C5'  DG A  37     -30.185  37.071  13.920  5.00  0.00           C  
ATOM   1171  O5'  DG A  37     -30.040  36.628  12.550  3.00  0.00           O  
ATOM   1172  C4'  DG A  37     -29.703  36.011  14.890  8.00  0.00           C  
ATOM   1173  O4'  DG A  37     -30.482  34.745  14.890  7.00  0.00           O  
ATOM   1174  C3'  DG A  37     -28.215  35.728  14.800  8.00  0.00           C  
ATOM   1175  O3'  DG A  37     -27.731  35.514  16.160  1.00  0.00           O  
ATOM   1176  C2'  DG A  37     -28.294  34.354  14.100  0.00  0.00           C  
ATOM   1177  C1'  DG A  37     -29.538  33.668  14.670  1.00  0.00           C  
ATOM   1178  N1   DG A  37     -30.746  28.704  14.670  2.00  0.00           N  
ATOM   1179  C2   DG A  37     -30.498  29.552  15.720  8.00  0.00           C  
ATOM   1180  N2   DG A  37     -30.311  28.977  16.910  9.00  0.00           N  
ATOM   1181  N3   DG A  37     -30.261  30.853  15.600  8.00  0.00           N  
ATOM   1182  C4   DG A  37     -30.387  31.288  14.330  3.00  0.00           C  
ATOM   1183  C5   DG A  37     -30.534  30.529  13.210  2.00  0.00           C  
ATOM   1184  C6   DG A  37     -30.752  29.148  13.360  7.00  0.00           C  
ATOM   1185  O6   DG A  37     -30.892  28.308  12.510  1.00  0.00           O  
ATOM   1186  N7   DG A  37     -30.583  31.260  12.030  5.00  0.00           N  
ATOM   1187  C8   DG A  37     -30.264  32.445  12.500  8.00  0.00           C  
ATOM   1188  N9   DG A  37     -29.996  32.525  13.840  1.00  0.00           N  
ATOM   1189  OP1  DG A  37     -30.444  38.767  11.410  5.00  0.00           O  
ATOM   1190  OP2  DG A  37     -30.670  36.613  10.140  0.00  0.00           O1-
ATOM   1191  H1   DG A  37     -30.788  27.730  14.840  9.00  0.00           H  
ATOM   1192  H8   DG A  37     -30.266  33.355  11.840  4.00  0.00           H  
ATOM   1193  H1'  DG A  37     -29.228  33.371  15.710  9.00  0.00           H  
ATOM   1194  H2'  DG A  37     -28.515  34.599  13.080  3.00  0.00           H  
ATOM   1195  H21  DG A  37     -30.506  27.978  17.070  6.00  0.00           H  
ATOM   1196  H3'  DG A  37     -27.799  36.548  14.250  3.00  0.00           H  
ATOM   1197  H22  DG A  37     -29.739  29.574  17.500  7.00  0.00           H  
ATOM   1198  H4'  DG A  37     -29.881  36.581  15.880  3.00  0.00           H  
ATOM   1199  H5'  DG A  37     -31.213  37.270  14.090  0.00  0.00           H  
ATOM   1200 H2''  DG A  37     -27.385  33.752  14.110  3.00  0.00           H  
ATOM   1201 H5''  DG A  37     -29.638  37.972  14.020  7.00  0.00           H  
ATOM   1202  P    DG A  38     -26.244  35.241  16.470  3.00  0.00           P  
ATOM   1203  C5'  DG A  38     -26.786  33.114  17.720  5.00  0.00           C  
ATOM   1204  O5'  DG A  38     -26.200  33.716  16.610  9.00  0.00           O  
ATOM   1205  C4'  DG A  38     -26.575  31.634  17.990  0.00  0.00           C  
ATOM   1206  O4'  DG A  38     -27.343  30.912  17.050  0.00  0.00           O  
ATOM   1207  C3'  DG A  38     -25.167  30.949  18.100  4.00  0.00           C  
ATOM   1208  O3'  DG A  38     -25.088  30.140  19.260  4.00  0.00           O  
ATOM   1209  C2'  DG A  38     -25.067  30.386  16.720  5.00  0.00           C  
ATOM   1210  C1'  DG A  38     -26.521  29.894  16.590  6.00  0.00           C  
ATOM   1211  N1   DG A  38     -27.838  26.020  13.660  1.00  0.00           N  
ATOM   1212  C2   DG A  38     -27.511  25.997  14.950  8.00  0.00           C  
ATOM   1213  N2   DG A  38     -27.719  24.816  15.560  1.00  0.00           N  
ATOM   1214  N3   DG A  38     -27.125  27.078  15.620  8.00  0.00           N  
ATOM   1215  C4   DG A  38     -27.193  28.233  14.840  5.00  0.00           C  
ATOM   1216  C5   DG A  38     -27.449  28.340  13.470  6.00  0.00           C  
ATOM   1217  C6   DG A  38     -27.732  27.074  12.810  1.00  0.00           C  
ATOM   1218  O6   DG A  38     -27.985  26.851  11.590  7.00  0.00           O  
ATOM   1219  N7   DG A  38     -27.236  29.610  12.990  1.00  0.00           N  
ATOM   1220  C8   DG A  38     -26.949  30.291  14.040  6.00  0.00           C  
ATOM   1221  N9   DG A  38     -26.902  29.540  15.240  9.00  0.00           N  
ATOM   1222  OP1  DG A  38     -25.943  35.817  17.780  1.00  0.00           O  
ATOM   1223  OP2  DG A  38     -25.328  35.547  15.310  6.00  0.00           O1-
ATOM   1224  H1   DG A  38     -27.936  25.159  13.220  7.00  0.00           H  
ATOM   1225  H8   DG A  38     -26.618  31.328  14.010  5.00  0.00           H  
ATOM   1226  H1'  DG A  38     -26.699  29.037  17.330  2.00  0.00           H  
ATOM   1227  H2'  DG A  38     -24.806  31.214  16.010  7.00  0.00           H  
ATOM   1228  H21  DG A  38     -28.042  24.072  15.000  7.00  0.00           H  
ATOM   1229  H3'  DG A  38     -24.426  31.701  18.220  4.00  0.00           H  
ATOM   1230  H22  DG A  38     -27.086  24.564  16.320  5.00  0.00           H  
ATOM   1231  H4'  DG A  38     -26.965  31.535  18.950  0.00  0.00           H  
ATOM   1232  H5'  DG A  38     -27.781  33.320  17.770  7.00  0.00           H  
ATOM   1233 H2''  DG A  38     -24.273  29.666  16.630  3.00  0.00           H  
ATOM   1234 H5''  DG A  38     -26.303  33.509  18.640  0.00  0.00           H  
ATOM   1235  P    DG A  39     -23.737  29.439  19.600  3.00  0.00           P  
ATOM   1236  C5'  DG A  39     -24.452  26.827  19.510  7.00  0.00           C  
ATOM   1237  O5'  DG A  39     -23.660  27.941  18.980  0.00  0.00           O  
ATOM   1238  C4'  DG A  39     -24.222  25.433  18.940  1.00  0.00           C  
ATOM   1239  O4'  DG A  39     -24.743  25.349  17.590  6.00  0.00           O  
ATOM   1240  C3'  DG A  39     -22.769  25.015  18.910  3.00  0.00           C  
ATOM   1241  O3'  DG A  39     -22.563  23.613  19.060  8.00  0.00           O  
ATOM   1242  C2'  DG A  39     -22.549  25.465  17.420  1.00  0.00           C  
ATOM   1243  C1'  DG A  39     -23.728  24.911  16.730  0.00  0.00           C  
ATOM   1244  N1   DG A  39     -24.747  23.714  11.900  1.00  0.00           N  
ATOM   1245  C2   DG A  39     -24.464  22.917  12.970  4.00  0.00           C  
ATOM   1246  N2   DG A  39     -24.660  21.660  12.810  8.00  0.00           N  
ATOM   1247  N3   DG A  39     -24.344  23.279  14.220  7.00  0.00           N  
ATOM   1248  C4   DG A  39     -24.251  24.687  14.240  0.00  0.00           C  
ATOM   1249  C5   DG A  39     -24.379  25.612  13.180  3.00  0.00           C  
ATOM   1250  C6   DG A  39     -24.643  25.093  11.880  2.00  0.00           C  
ATOM   1251  O6   DG A  39     -24.942  25.616  10.810  5.00  0.00           O  
ATOM   1252  N7   DG A  39     -24.096  26.917  13.650  1.00  0.00           N  
ATOM   1253  C8   DG A  39     -23.878  26.752  14.920  8.00  0.00           C  
ATOM   1254  N9   DG A  39     -23.962  25.440  15.340  3.00  0.00           N  
ATOM   1255  OP1  DG A  39     -23.721  29.215  21.060  9.00  0.00           O  
ATOM   1256  OP2  DG A  39     -22.657  30.158  18.920  2.00  0.00           O1-
ATOM   1257  H1   DG A  39     -25.109  23.270  11.100  6.00  0.00           H  
ATOM   1258  H8   DG A  39     -23.472  27.464  15.630  0.00  0.00           H  
ATOM   1259  H1'  DG A  39     -23.518  23.824  16.740  8.00  0.00           H  
ATOM   1260  H2'  DG A  39     -22.363  26.526  17.230  0.00  0.00           H  
ATOM   1261  H21  DG A  39     -24.968  21.261  11.870  3.00  0.00           H  
ATOM   1262  H3'  DG A  39     -22.085  25.616  19.460  2.00  0.00           H  
ATOM   1263  H22  DG A  39     -24.673  21.007  13.600  7.00  0.00           H  
ATOM   1264  H4'  DG A  39     -24.790  24.709  19.580  0.00  0.00           H  
ATOM   1265  H5'  DG A  39     -25.517  27.015  19.250  0.00  0.00           H  
ATOM   1266 H2''  DG A  39     -21.705  24.903  16.980  8.00  0.00           H  
ATOM   1267 H5''  DG A  39     -24.410  26.889  20.560  1.00  0.00           H  
ATOM   1268  P    DT A  40     -21.097  22.949  19.260  6.00  0.00           P  
ATOM   1269  C5'  DT A  40     -21.757  20.647  18.360  5.00  0.00           C  
ATOM   1270  O5'  DT A  40     -21.037  21.837  18.090  3.00  0.00           O  
ATOM   1271  C4'  DT A  40     -21.733  19.564  17.240  5.00  0.00           C  
ATOM   1272  O4'  DT A  40     -22.116  20.146  15.990  6.00  0.00           O  
ATOM   1273  C3'  DT A  40     -20.304  19.029  17.000  7.00  0.00           C  
ATOM   1274  O3'  DT A  40     -20.304  17.611  16.690  9.00  0.00           O  
ATOM   1275  C2'  DT A  40     -19.943  19.936  15.850  3.00  0.00           C  
ATOM   1276  C1'  DT A  40     -21.161  19.907  15.000  7.00  0.00           C  
ATOM   1277  N1   DT A  40     -21.148  20.966  13.990  4.00  0.00           N  
ATOM   1278  C2   DT A  40     -21.470  20.608  12.670  7.00  0.00           C  
ATOM   1279  O2   DT A  40     -21.862  19.488  12.370  1.00  0.00           O  
ATOM   1280  N3   DT A  40     -21.472  21.623  11.680  5.00  0.00           N  
ATOM   1281  C4   DT A  40     -21.311  22.940  11.980  7.00  0.00           C  
ATOM   1282  O4   DT A  40     -21.393  23.749  11.070  5.00  0.00           O  
ATOM   1283  C5   DT A  40     -21.061  23.285  13.390  3.00  0.00           C  
ATOM   1284  C6   DT A  40     -21.014  22.281  14.320  8.00  0.00           C  
ATOM   1285  C7   DT A  40     -20.789  24.756  13.720  7.00  0.00           C  
ATOM   1286  OP1  DT A  40     -20.986  22.253  20.580  7.00  0.00           O  
ATOM   1287  OP2  DT A  40     -20.124  23.957  18.870  7.00  0.00           O1-
ATOM   1288  H3   DT A  40     -21.857  21.401  10.780  1.00  0.00           H  
ATOM   1289  H6   DT A  40     -20.711  22.555  15.300  8.00  0.00           H  
ATOM   1290  H1'  DT A  40     -21.215  18.905  14.580  0.00  0.00           H  
ATOM   1291  H2'  DT A  40     -19.725  20.957  16.190  2.00  0.00           H  
ATOM   1292  H3'  DT A  40     -19.746  19.205  17.920  0.00  0.00           H  
ATOM   1293  H4'  DT A  40     -22.308  18.718  17.480  0.00  0.00           H  
ATOM   1294  H5'  DT A  40     -22.826  20.930  18.400  5.00  0.00           H  
ATOM   1295  H71  DT A  40     -20.547  24.964  14.760  7.00  0.00           H  
ATOM   1296  H72  DT A  40     -19.914  25.038  13.150  6.00  0.00           H  
ATOM   1297  H73  DT A  40     -21.687  25.447  13.450  2.00  0.00           H  
ATOM   1298 H2''  DT A  40     -19.127  19.595  15.310  9.00  0.00           H  
ATOM   1299 H5''  DT A  40     -21.525  20.151  19.280  3.00  0.00           H  
ATOM   1300  P    DT A  41     -19.041  16.753  16.430  5.00  0.00           P  
ATOM   1301  C5'  DT A  41     -19.856  16.141  14.040  2.00  0.00           C  
ATOM   1302  O5'  DT A  41     -18.989  16.864  14.850  9.00  0.00           O  
ATOM   1303  C4'  DT A  41     -19.353  16.077  12.590  9.00  0.00           C  
ATOM   1304  O4'  DT A  41     -19.370  17.344  11.950  3.00  0.00           O  
ATOM   1305  C3'  DT A  41     -17.834  15.657  12.460  1.00  0.00           C  
ATOM   1306  O3'  DT A  41     -17.616  14.919  11.180  9.00  0.00           O  
ATOM   1307  C2'  DT A  41     -17.107  16.986  12.370  8.00  0.00           C  
ATOM   1308  C1'  DT A  41     -18.068  17.591  11.450  6.00  0.00           C  
ATOM   1309  N1   DT A  41     -18.019  19.123  11.290  6.00  0.00           N  
ATOM   1310  C2   DT A  41     -18.520  19.736  10.150  8.00  0.00           C  
ATOM   1311  O2   DT A  41     -18.937  19.065   9.190  3.00  0.00           O  
ATOM   1312  N3   DT A  41     -18.565  21.064  10.080  3.00  0.00           N  
ATOM   1313  C4   DT A  41     -18.047  21.965  11.000  5.00  0.00           C  
ATOM   1314  O4   DT A  41     -18.128  23.181  10.780  9.00  0.00           O  
ATOM   1315  C5   DT A  41     -17.654  21.291  12.280  1.00  0.00           C  
ATOM   1316  C6   DT A  41     -17.622  19.933  12.330  9.00  0.00           C  
ATOM   1317  C7   DT A  41     -17.256  22.124  13.440  5.00  0.00           C  
ATOM   1318  OP1  DT A  41     -19.252  15.345  16.810  8.00  0.00           O  
ATOM   1319  OP2  DT A  41     -17.782  17.414  16.860  6.00  0.00           O1-
ATOM   1320  H3   DT A  41     -18.994  21.430   9.210  5.00  0.00           H  
ATOM   1321  H6   DT A  41     -17.389  19.431  13.190  5.00  0.00           H  
ATOM   1322  H1'  DT A  41     -18.009  17.124  10.540  2.00  0.00           H  
ATOM   1323  H2'  DT A  41     -16.959  17.485  13.280  3.00  0.00           H  
ATOM   1324  H3'  DT A  41     -17.598  15.146  13.340  8.00  0.00           H  
ATOM   1325  H4'  DT A  41     -19.978  15.371  12.130  9.00  0.00           H  
ATOM   1326  H5'  DT A  41     -20.826  16.539  14.140  1.00  0.00           H  
ATOM   1327  H71  DT A  41     -17.099  21.501  14.350  0.00  0.00           H  
ATOM   1328  H72  DT A  41     -16.481  22.828  13.210  8.00  0.00           H  
ATOM   1329  H73  DT A  41     -18.074  22.778  13.560  8.00  0.00           H  
ATOM   1330 H2''  DT A  41     -16.090  16.840  11.940  8.00  0.00           H  
ATOM   1331 H5''  DT A  41     -19.849  15.122  14.430  9.00  0.00           H  
ATOM   1332  P    DA A  42     -17.101  13.446  11.190  5.00  0.00           P  
ATOM   1333  C5'  DA A  42     -18.324  12.754   8.990  2.00  0.00           C  
ATOM   1334  O5'  DA A  42     -17.116  13.110   9.630  9.00  0.00           O  
ATOM   1335  C4'  DA A  42     -18.518  13.320   7.600  4.00  0.00           C  
ATOM   1336  O4'  DA A  42     -18.596  14.719   7.400  9.00  0.00           O  
ATOM   1337  C3'  DA A  42     -17.392  12.738   6.680  4.00  0.00           C  
ATOM   1338  O3'  DA A  42     -17.899  12.578   5.400  0.00  0.00           O  
ATOM   1339  C2'  DA A  42     -16.357  13.871   6.710  8.00  0.00           C  
ATOM   1340  C1'  DA A  42     -17.333  15.120   6.830  9.00  0.00           C  
ATOM   1341  N1   DA A  42     -16.248  20.187   7.360  9.00  0.00           N  
ATOM   1342  C2   DA A  42     -16.928  19.500   6.430  8.00  0.00           C  
ATOM   1343  N3   DA A  42     -17.139  18.179   6.440  1.00  0.00           N  
ATOM   1344  C4   DA A  42     -16.520  17.497   7.420  0.00  0.00           C  
ATOM   1345  C5   DA A  42     -15.795  18.073   8.360  9.00  0.00           C  
ATOM   1346  C6   DA A  42     -15.760  19.495   8.390  8.00  0.00           C  
ATOM   1347  N6   DA A  42     -15.218  20.321   9.280  6.00  0.00           N  
ATOM   1348  N7   DA A  42     -15.220  17.070   9.170  6.00  0.00           N  
ATOM   1349  C8   DA A  42     -15.783  15.978   8.700  4.00  0.00           C  
ATOM   1350  N9   DA A  42     -16.605  16.150   7.610  7.00  0.00           N  
ATOM   1351  OP1  DA A  42     -18.191  12.705  11.810  2.00  0.00           O  
ATOM   1352  OP2  DA A  42     -15.748  13.450  11.770  4.00  0.00           O1-
ATOM   1353  H2   DA A  42     -17.270  20.112   5.590  0.00  0.00           H  
ATOM   1354  H8   DA A  42     -15.519  14.974   9.110  3.00  0.00           H  
ATOM   1355  H1'  DA A  42     -17.462  15.417   5.730  5.00  0.00           H  
ATOM   1356  H2'  DA A  42     -15.665  13.765   7.500  6.00  0.00           H  
ATOM   1357  H3'  DA A  42     -17.097  11.758   7.060  3.00  0.00           H  
ATOM   1358  H4'  DA A  42     -19.448  12.816   7.270  3.00  0.00           H  
ATOM   1359  H5'  DA A  42     -19.236  13.170   9.550  3.00  0.00           H  
ATOM   1360  H61  DA A  42     -15.226  21.380   9.070  7.00  0.00           H  
ATOM   1361  H62  DA A  42     -14.513  19.889   9.890  3.00  0.00           H  
ATOM   1362 H2''  DA A  42     -15.790  13.894   5.760  2.00  0.00           H  
ATOM   1363 H5''  DA A  42     -18.543  11.690   8.990  3.00  0.00           H  
ATOM   1364  P    DG A  43     -17.000  11.822   4.250  2.00  0.00           P  
ATOM   1365  C5'  DG A  43     -17.065  13.850   2.580  5.00  0.00           C  
ATOM   1366  O5'  DG A  43     -16.298  12.987   3.470  4.00  0.00           O  
ATOM   1367  C4'  DG A  43     -16.268  15.034   2.110  1.00  0.00           C  
ATOM   1368  O4'  DG A  43     -16.033  15.826   3.270  3.00  0.00           O  
ATOM   1369  C3'  DG A  43     -14.902  14.842   1.490  4.00  0.00           C  
ATOM   1370  O3'  DG A  43     -14.644  15.839   0.470  1.00  0.00           O  
ATOM   1371  C2'  DG A  43     -13.920  15.241   2.570  9.00  0.00           C  
ATOM   1372  C1'  DG A  43     -14.745  16.361   3.230  0.00  0.00           C  
ATOM   1373  N1   DG A  43     -13.111  20.471   5.430  0.00  0.00           N  
ATOM   1374  C2   DG A  43     -13.966  20.302   4.380  6.00  0.00           C  
ATOM   1375  N2   DG A  43     -14.288  21.410   3.730  9.00  0.00           N  
ATOM   1376  N3   DG A  43     -14.349  19.136   3.910  3.00  0.00           N  
ATOM   1377  C4   DG A  43     -13.915  18.114   4.660  3.00  0.00           C  
ATOM   1378  C5   DG A  43     -13.249  18.196   5.860  2.00  0.00           C  
ATOM   1379  C6   DG A  43     -12.778  19.479   6.250  9.00  0.00           C  
ATOM   1380  O6   DG A  43     -12.080  19.790   7.230  1.00  0.00           O  
ATOM   1381  N7   DG A  43     -13.025  16.909   6.410  8.00  0.00           N  
ATOM   1382  C8   DG A  43     -13.728  16.185   5.570  1.00  0.00           C  
ATOM   1383  N9   DG A  43     -14.266  16.876   4.510  6.00  0.00           N  
ATOM   1384  OP1  DG A  43     -17.958  11.188   3.320  8.00  0.00           O  
ATOM   1385  OP2  DG A  43     -15.950  10.909   4.900  3.00  0.00           O1-
ATOM   1386  H1   DG A  43     -12.738  21.428   5.540  9.00  0.00           H  
ATOM   1387  H8   DG A  43     -13.676  15.071   5.620  6.00  0.00           H  
ATOM   1388  H1'  DG A  43     -14.596  17.125   2.450  3.00  0.00           H  
ATOM   1389  H2'  DG A  43     -13.744  14.449   3.270  5.00  0.00           H  
ATOM   1390  H21  DG A  43     -13.740  22.232   3.860  0.00  0.00           H  
ATOM   1391  H3'  DG A  43     -14.693  13.818   1.230  9.00  0.00           H  
ATOM   1392  H22  DG A  43     -14.887  21.301   2.950  7.00  0.00           H  
ATOM   1393  H4'  DG A  43     -16.796  15.684   1.390  9.00  0.00           H  
ATOM   1394  H5'  DG A  43     -17.894  14.274   3.050  9.00  0.00           H  
ATOM   1395 H2''  DG A  43     -13.009  15.545   2.120  9.00  0.00           H  
ATOM   1396 H5''  DG A  43     -17.331  13.274   1.660  1.00  0.00           H  
ATOM   1397  P    DG A  44     -14.285  15.447  -1.030  7.00  0.00           P  
ATOM   1398  C5'  DG A  44     -15.159  17.710  -2.060  3.00  0.00           C  
ATOM   1399  O5'  DG A  44     -14.110  16.840  -1.810  2.00  0.00           O  
ATOM   1400  C4'  DG A  44     -14.813  19.187  -2.140  1.00  0.00           C  
ATOM   1401  O4'  DG A  44     -14.558  19.795  -0.810  7.00  0.00           O  
ATOM   1402  C3'  DG A  44     -13.536  19.313  -3.040  9.00  0.00           C  
ATOM   1403  O3'  DG A  44     -13.483  20.448  -3.910  2.00  0.00           O  
ATOM   1404  C2'  DG A  44     -12.484  19.390  -1.930  8.00  0.00           C  
ATOM   1405  C1'  DG A  44     -13.194  20.078  -0.760  9.00  0.00           C  
ATOM   1406  N1   DG A  44      -9.973  21.254   3.200  0.00  0.00           N  
ATOM   1407  C2   DG A  44     -10.475  22.076   2.190  9.00  0.00           C  
ATOM   1408  N2   DG A  44     -10.007  23.310   2.170  6.00  0.00           N  
ATOM   1409  N3   DG A  44     -11.291  21.674   1.220  3.00  0.00           N  
ATOM   1410  C4   DG A  44     -11.590  20.321   1.240  7.00  0.00           C  
ATOM   1411  C5   DG A  44     -11.218  19.470   2.230  6.00  0.00           C  
ATOM   1412  C6   DG A  44     -10.372  19.910   3.310  4.00  0.00           C  
ATOM   1413  O6   DG A  44      -9.844  19.284   4.270  0.00  0.00           O  
ATOM   1414  N7   DG A  44     -11.657  18.205   1.940  1.00  0.00           N  
ATOM   1415  C8   DG A  44     -12.420  18.316   0.920  5.00  0.00           C  
ATOM   1416  N9   DG A  44     -12.495  19.606   0.450  0.00  0.00           N  
ATOM   1417  OP1  DG A  44     -15.324  14.685  -1.690  3.00  0.00           O  
ATOM   1418  OP2  DG A  44     -12.954  14.835  -1.110  4.00  0.00           O1-
ATOM   1419  H1   DG A  44      -9.374  21.695   3.930  7.00  0.00           H  
ATOM   1420  H8   DG A  44     -12.969  17.481   0.550  0.00  0.00           H  
ATOM   1421  H1'  DG A  44     -13.001  21.144  -0.880  6.00  0.00           H  
ATOM   1422  H2'  DG A  44     -12.207  18.327  -1.750  1.00  0.00           H  
ATOM   1423  H21  DG A  44      -9.220  23.623   2.790  5.00  0.00           H  
ATOM   1424  H3'  DG A  44     -13.415  18.434  -3.690  6.00  0.00           H  
ATOM   1425  H22  DG A  44     -10.287  23.861   1.330  8.00  0.00           H  
ATOM   1426  H4'  DG A  44     -15.645  19.716  -2.660  7.00  0.00           H  
ATOM   1427  H5'  DG A  44     -15.896  17.596  -1.240  9.00  0.00           H  
ATOM   1428 H2''  DG A  44     -11.557  19.875  -2.240  6.00  0.00           H  
ATOM   1429 H5''  DG A  44     -15.570  17.470  -3.040  6.00  0.00           H  
ATOM   1430  P   DG3 A  45     -12.224  20.825  -4.820  1.00  0.00           P  
ATOM   1431  C5' DG3 A  45     -11.094  22.736  -3.300  6.00  0.00           C  
ATOM   1432  O5' DG3 A  45     -11.052  21.452  -3.880  9.00  0.00           O  
ATOM   1433  C4' DG3 A  45      -9.817  23.101  -2.500  4.00  0.00           C  
ATOM   1434  O4' DG3 A  45      -9.862  22.346  -1.320  7.00  0.00           O  
ATOM   1435  C3' DG3 A  45      -8.444  22.890  -3.230  4.00  0.00           C  
ATOM   1436  O3' DG3 A  45      -7.579  24.014  -3.250  2.00  0.00           O  
ATOM   1437  C2' DG3 A  45      -7.853  21.731  -2.390  9.00  0.00           C  
ATOM   1438  C1' DG3 A  45      -8.502  22.055  -1.040  2.00  0.00           C  
ATOM   1439  N1  DG3 A  45      -6.133  21.008   3.210  0.00  0.00           N  
ATOM   1440  C2  DG3 A  45      -6.145  22.144   2.500  6.00  0.00           C  
ATOM   1441  N2  DG3 A  45      -5.426  23.093   2.920  2.00  0.00           N  
ATOM   1442  N3  DG3 A  45      -6.826  22.332   1.370  2.00  0.00           N  
ATOM   1443  C4  DG3 A  45      -7.451  21.123   0.960  1.00  0.00           C  
ATOM   1444  C5  DG3 A  45      -7.546  19.965   1.630  6.00  0.00           C  
ATOM   1445  C6  DG3 A  45      -6.882  19.862   2.940  3.00  0.00           C  
ATOM   1446  O6  DG3 A  45      -6.870  19.000   3.810  1.00  0.00           O  
ATOM   1447  N7  DG3 A  45      -8.178  18.998   0.810  6.00  0.00           N  
ATOM   1448  C8  DG3 A  45      -8.566  19.662  -0.230  2.00  0.00           C  
ATOM   1449  N9  DG3 A  45      -8.268  20.992  -0.140  0.00  0.00           N  
ATOM   1450  OP1 DG3 A  45     -12.710  21.905  -5.750  8.00  0.00           O  
ATOM   1451  OP2 DG3 A  45     -11.664  19.583  -5.380  6.00  0.00           O  
ATOM   1452 HO3' DG3 A  45      -6.810  23.753  -3.710  3.00  0.00           H  
ATOM   1453  H1  DG3 A  45      -5.541  20.918   4.020  7.00  0.00           H  
ATOM   1454  H8  DG3 A  45      -9.171  19.301  -1.080  5.00  0.00           H  
ATOM   1455  H1' DG3 A  45      -8.112  23.010  -0.620  3.00  0.00           H  
ATOM   1456  H2' DG3 A  45      -8.180  20.732  -2.750  5.00  0.00           H  
ATOM   1457  H21 DG3 A  45      -4.898  22.963   3.820  9.00  0.00           H  
ATOM   1458  H3' DG3 A  45      -8.619  22.500  -4.240  6.00  0.00           H  
ATOM   1459  H22 DG3 A  45      -5.419  24.004   2.480  0.00  0.00           H  
ATOM   1460  H4' DG3 A  45      -9.867  24.181  -2.290  6.00  0.00           H  
ATOM   1461  H5' DG3 A  45     -11.891  22.679  -2.600  5.00  0.00           H  
ATOM   1462 H2'' DG3 A  45      -6.790  21.855  -2.340  4.00  0.00           H  
ATOM   1463 H5'' DG3 A  45     -11.325  23.538  -3.980  8.00  0.00           H  
ATOM   1464  C5' DC5 A  46      -0.309  21.830  10.690  2.00  0.00           C  
ATOM   1465  O5' DC5 A  46      -1.049  20.599  10.750  6.00  0.00           O  
ATOM   1466  C4' DC5 A  46      -0.905  22.861   9.700  3.00  0.00           C  
ATOM   1467  O4' DC5 A  46      -1.122  22.358   8.400  9.00  0.00           O  
ATOM   1468  C3' DC5 A  46      -2.188  23.495  10.220  5.00  0.00           C  
ATOM   1469  O3' DC5 A  46      -2.204  24.892   9.830  1.00  0.00           O  
ATOM   1470  C2' DC5 A  46      -3.170  22.710   9.480  7.00  0.00           C  
ATOM   1471  C1' DC5 A  46      -2.486  22.520   8.070  2.00  0.00           C  
ATOM   1472  N1  DC5 A  46      -2.980  21.358   7.250  6.00  0.00           N  
ATOM   1473  C2  DC5 A  46      -3.719  21.550   6.030  8.00  0.00           C  
ATOM   1474  O2  DC5 A  46      -3.783  22.604   5.470  0.00  0.00           O  
ATOM   1475  N3  DC5 A  46      -4.313  20.474   5.410  8.00  0.00           N  
ATOM   1476  C4  DC5 A  46      -4.125  19.279   5.910  6.00  0.00           C  
ATOM   1477  N4  DC5 A  46      -4.537  18.314   5.210  9.00  0.00           N  
ATOM   1478  C5  DC5 A  46      -3.286  18.990   7.030  4.00  0.00           C  
ATOM   1479  C6  DC5 A  46      -2.761  20.042   7.710  6.00  0.00           C  
ATOM   1480 HO5' DC5 A  46      -0.390  19.871  10.580  9.00  0.00           H  
ATOM   1481  H5  DC5 A  46      -3.092  18.034   7.440  2.00  0.00           H  
ATOM   1482  H6  DC5 A  46      -2.181  19.874   8.620  1.00  0.00           H  
ATOM   1483  H1' DC5 A  46      -2.524  23.507   7.690  9.00  0.00           H  
ATOM   1484  H2' DC5 A  46      -3.287  21.638   9.800  1.00  0.00           H  
ATOM   1485  H3' DC5 A  46      -2.201  23.367  11.290  5.00  0.00           H  
ATOM   1486  H4' DC5 A  46      -0.062  23.622   9.570  7.00  0.00           H  
ATOM   1487  H41 DC5 A  46      -5.239  18.584   4.580  9.00  0.00           H  
ATOM   1488  H5' DC5 A  46       0.772  21.672  10.590  8.00  0.00           H  
ATOM   1489  H42 DC5 A  46      -4.509  17.403   5.550  6.00  0.00           H  
ATOM   1490 H2'' DC5 A  46      -4.135  23.219   9.470  7.00  0.00           H  
ATOM   1491 H5'' DC5 A  46      -0.397  22.275  11.690  2.00  0.00           H  
ATOM   1492  P    DC A  47      -3.359  25.919  10.300  1.00  0.00           P  
ATOM   1493  C5'  DC A  47      -3.741  26.847   7.930  6.00  0.00           C  
ATOM   1494  O5'  DC A  47      -4.295  26.111   9.050  8.00  0.00           O  
ATOM   1495  C4'  DC A  47      -4.623  26.843   6.580  3.00  0.00           C  
ATOM   1496  O4'  DC A  47      -4.874  25.547   6.100  4.00  0.00           O  
ATOM   1497  C3'  DC A  47      -5.954  27.578   6.730  7.00  0.00           C  
ATOM   1498  O3'  DC A  47      -6.356  28.318   5.540  3.00  0.00           O  
ATOM   1499  C2'  DC A  47      -6.877  26.411   6.970  1.00  0.00           C  
ATOM   1500  C1'  DC A  47      -6.282  25.436   5.910  5.00  0.00           C  
ATOM   1501  N1   DC A  47      -6.898  24.048   6.120  1.00  0.00           N  
ATOM   1502  C2   DC A  47      -7.830  23.525   5.210  6.00  0.00           C  
ATOM   1503  O2   DC A  47      -8.236  24.062   4.180  1.00  0.00           O  
ATOM   1504  N3   DC A  47      -8.408  22.333   5.370  9.00  0.00           N  
ATOM   1505  C4   DC A  47      -8.155  21.710   6.510  6.00  0.00           C  
ATOM   1506  N4   DC A  47      -8.873  20.673   6.700  6.00  0.00           N  
ATOM   1507  C5   DC A  47      -7.333  22.192   7.540  6.00  0.00           C  
ATOM   1508  C6   DC A  47      -6.694  23.394   7.280  1.00  0.00           C  
ATOM   1509  OP1  DC A  47      -2.728  27.190  10.670  8.00  0.00           O  
ATOM   1510  OP2  DC A  47      -4.208  25.229  11.330  3.00  0.00           O1-
ATOM   1511  H5   DC A  47      -7.192  21.648   8.490  0.00  0.00           H  
ATOM   1512  H6   DC A  47      -5.978  23.748   8.000  0.00  0.00           H  
ATOM   1513  H1'  DC A  47      -6.545  25.841   4.920  7.00  0.00           H  
ATOM   1514  H2'  DC A  47      -6.790  25.933   7.910  9.00  0.00           H  
ATOM   1515  H3'  DC A  47      -5.960  28.248   7.540  4.00  0.00           H  
ATOM   1516  H4'  DC A  47      -3.987  27.474   5.940  9.00  0.00           H  
ATOM   1517  H41  DC A  47      -9.219  20.272   5.810  0.00  0.00           H  
ATOM   1518  H5'  DC A  47      -2.806  26.382   7.730  7.00  0.00           H  
ATOM   1519  H42  DC A  47      -8.865  20.273   7.600  9.00  0.00           H  
ATOM   1520 H2''  DC A  47      -7.956  26.570   6.930  8.00  0.00           H  
ATOM   1521 H5''  DC A  47      -3.407  27.901   8.170  9.00  0.00           H  
ATOM   1522  P    DC A  48      -7.617  29.358   5.650  3.00  0.00           P  
ATOM   1523  C5'  DC A  48      -8.724  28.448   3.490  4.00  0.00           C  
ATOM   1524  O5'  DC A  48      -8.844  28.642   4.880  4.00  0.00           O  
ATOM   1525  C4'  DC A  48      -9.961  27.776   2.920  9.00  0.00           C  
ATOM   1526  O4'  DC A  48     -10.076  26.441   3.290  3.00  0.00           O  
ATOM   1527  C3'  DC A  48     -11.337  28.483   3.240  3.00  0.00           C  
ATOM   1528  O3'  DC A  48     -12.143  28.479   2.030  5.00  0.00           O  
ATOM   1529  C2'  DC A  48     -11.852  27.556   4.310  4.00  0.00           C  
ATOM   1530  C1'  DC A  48     -11.406  26.205   3.810  8.00  0.00           C  
ATOM   1531  N1   DC A  48     -11.383  25.245   4.890  9.00  0.00           N  
ATOM   1532  C2   DC A  48     -12.140  24.047   4.780  6.00  0.00           C  
ATOM   1533  O2   DC A  48     -12.854  23.851   3.760  7.00  0.00           O  
ATOM   1534  N3   DC A  48     -12.125  23.093   5.750  8.00  0.00           N  
ATOM   1535  C4   DC A  48     -11.433  23.378   6.830  5.00  0.00           C  
ATOM   1536  N4   DC A  48     -11.546  22.488   7.810  0.00  0.00           N  
ATOM   1537  C5   DC A  48     -10.661  24.563   7.030  5.00  0.00           C  
ATOM   1538  C6   DC A  48     -10.647  25.447   6.030  6.00  0.00           C  
ATOM   1539  OP1  DC A  48      -7.352  30.574   4.890  0.00  0.00           O  
ATOM   1540  OP2  DC A  48      -8.026  29.444   7.040  2.00  0.00           O1-
ATOM   1541  H5   DC A  48      -9.983  24.652   7.910  9.00  0.00           H  
ATOM   1542  H6   DC A  48     -10.065  26.373   6.130  4.00  0.00           H  
ATOM   1543  H1'  DC A  48     -12.043  25.868   3.090  4.00  0.00           H  
ATOM   1544  H2'  DC A  48     -11.269  27.837   5.220  9.00  0.00           H  
ATOM   1545  H3'  DC A  48     -11.241  29.449   3.560  8.00  0.00           H  
ATOM   1546  H4'  DC A  48      -9.769  27.734   1.820  3.00  0.00           H  
ATOM   1547  H41  DC A  48     -11.914  21.585   7.490  2.00  0.00           H  
ATOM   1548  H5'  DC A  48      -7.953  27.761   3.250  6.00  0.00           H  
ATOM   1549  H42  DC A  48     -11.067  22.604   8.740  6.00  0.00           H  
ATOM   1550 H2''  DC A  48     -12.939  27.620   4.350  0.00  0.00           H  
ATOM   1551 H5''  DC A  48      -8.558  29.349   2.910  2.00  0.00           H  
ATOM   1552  P    DT A  49     -13.446  29.340   1.910  6.00  0.00           P  
ATOM   1553  C5'  DT A  49     -15.112  27.437   1.170  1.00  0.00           C  
ATOM   1554  O5'  DT A  49     -14.729  28.432   2.090  7.00  0.00           O  
ATOM   1555  C4'  DT A  49     -16.242  26.474   1.600  4.00  0.00           C  
ATOM   1556  O4'  DT A  49     -15.702  25.594   2.640  7.00  0.00           O  
ATOM   1557  C3'  DT A  49     -17.493  27.173   2.240  0.00  0.00           C  
ATOM   1558  O3'  DT A  49     -18.634  26.440   1.760  9.00  0.00           O  
ATOM   1559  C2'  DT A  49     -17.370  26.699   3.690  9.00  0.00           C  
ATOM   1560  C1'  DT A  49     -16.769  25.336   3.550  5.00  0.00           C  
ATOM   1561  N1   DT A  49     -16.312  24.800   4.870  2.00  0.00           N  
ATOM   1562  C2   DT A  49     -16.574  23.518   5.170  4.00  0.00           C  
ATOM   1563  O2   DT A  49     -17.247  22.789   4.480  7.00  0.00           O  
ATOM   1564  N3   DT A  49     -16.100  23.068   6.340  4.00  0.00           N  
ATOM   1565  C4   DT A  49     -15.265  23.681   7.150  7.00  0.00           C  
ATOM   1566  O4   DT A  49     -14.778  23.085   8.080  3.00  0.00           O  
ATOM   1567  C5   DT A  49     -15.010  25.061   6.860  5.00  0.00           C  
ATOM   1568  C6   DT A  49     -15.614  25.597   5.760  4.00  0.00           C  
ATOM   1569  C7   DT A  49     -14.171  25.959   7.690  0.00  0.00           C  
ATOM   1570  OP1  DT A  49     -13.401  29.805   0.510  0.00  0.00           O  
ATOM   1571  OP2  DT A  49     -13.415  30.361   2.920  3.00  0.00           O1-
ATOM   1572  H3   DT A  49     -16.353  22.138   6.500  5.00  0.00           H  
ATOM   1573  H6   DT A  49     -15.542  26.661   5.490  1.00  0.00           H  
ATOM   1574  H1'  DT A  49     -17.506  24.676   3.180  4.00  0.00           H  
ATOM   1575  H2'  DT A  49     -16.804  27.456   4.300  9.00  0.00           H  
ATOM   1576  H3'  DT A  49     -17.556  28.270   2.010  8.00  0.00           H  
ATOM   1577  H4'  DT A  49     -16.584  25.885   0.780  7.00  0.00           H  
ATOM   1578  H5'  DT A  49     -14.205  26.845   1.040  8.00  0.00           H  
ATOM   1579  H71  DT A  49     -13.282  25.471   7.990  4.00  0.00           H  
ATOM   1580  H72  DT A  49     -14.032  26.869   7.180  0.00  0.00           H  
ATOM   1581  H73  DT A  49     -14.799  26.116   8.540  8.00  0.00           H  
ATOM   1582 H2''  DT A  49     -18.378  26.483   4.060  4.00  0.00           H  
ATOM   1583 H5''  DT A  49     -15.346  27.921   0.180  4.00  0.00           H  
ATOM   1584  P    DA A  50     -19.730  27.105   0.990  6.00  0.00           P  
ATOM   1585  C5'  DA A  50     -20.388  24.607   0.330  2.00  0.00           C  
ATOM   1586  O5'  DA A  50     -20.823  25.864   0.840  9.00  0.00           O  
ATOM   1587  C4'  DA A  50     -21.106  23.272   0.690  8.00  0.00           C  
ATOM   1588  O4'  DA A  50     -20.726  22.677   1.940  1.00  0.00           O  
ATOM   1589  C3'  DA A  50     -22.630  23.433   0.770  4.00  0.00           C  
ATOM   1590  O3'  DA A  50     -23.309  22.290   0.280  1.00  0.00           O  
ATOM   1591  C2'  DA A  50     -22.839  23.725   2.270  6.00  0.00           C  
ATOM   1592  C1'  DA A  50     -21.684  22.973   2.980  9.00  0.00           C  
ATOM   1593  N1   DA A  50     -19.753  22.290   7.660  6.00  0.00           N  
ATOM   1594  C2   DA A  50     -20.307  21.467   6.820  9.00  0.00           C  
ATOM   1595  N3   DA A  50     -20.749  21.640   5.580  4.00  0.00           N  
ATOM   1596  C4   DA A  50     -20.698  22.985   5.290  9.00  0.00           C  
ATOM   1597  C5   DA A  50     -20.238  24.029   6.120  8.00  0.00           C  
ATOM   1598  C6   DA A  50     -19.773  23.620   7.350  9.00  0.00           C  
ATOM   1599  N6   DA A  50     -19.165  24.384   8.250  8.00  0.00           N  
ATOM   1600  N7   DA A  50     -20.230  25.253   5.410  0.00  0.00           N  
ATOM   1601  C8   DA A  50     -20.830  24.963   4.260  3.00  0.00           C  
ATOM   1602  N9   DA A  50     -21.062  23.604   4.090  3.00  0.00           N  
ATOM   1603  OP1  DA A  50     -19.216  27.454  -0.300  3.00  0.00           O  
ATOM   1604  OP2  DA A  50     -20.419  28.088   1.890  5.00  0.00           O1-
ATOM   1605  H2   DA A  50     -20.450  20.435   7.120  7.00  0.00           H  
ATOM   1606  H8   DA A  50     -21.132  25.706   3.480  7.00  0.00           H  
ATOM   1607  H1'  DA A  50     -21.989  22.005   3.240  1.00  0.00           H  
ATOM   1608  H2'  DA A  50     -22.679  24.815   2.490  8.00  0.00           H  
ATOM   1609  H3'  DA A  50     -23.004  24.228   0.170  4.00  0.00           H  
ATOM   1610  H4'  DA A  50     -20.800  22.504  -0.080  9.00  0.00           H  
ATOM   1611  H5'  DA A  50     -19.324  24.499   0.550  3.00  0.00           H  
ATOM   1612  H61  DA A  50     -18.906  23.940   9.090  7.00  0.00           H  
ATOM   1613  H62  DA A  50     -18.923  25.364   8.080  2.00  0.00           H  
ATOM   1614 H2''  DA A  50     -23.792  23.427   2.580  8.00  0.00           H  
ATOM   1615 H5''  DA A  50     -20.502  24.645  -0.780  2.00  0.00           H  
ATOM   1616  P    DA A  51     -24.949  21.931   0.450  5.00  0.00           P  
ATOM   1617  C5'  DA A  51     -24.215  19.536   1.190  5.00  0.00           C  
ATOM   1618  O5'  DA A  51     -24.891  20.748   1.510  1.00  0.00           O  
ATOM   1619  C4'  DA A  51     -24.260  18.546   2.400  7.00  0.00           C  
ATOM   1620  O4'  DA A  51     -23.656  19.173   3.500  9.00  0.00           O  
ATOM   1621  C3'  DA A  51     -25.668  18.097   2.910  3.00  0.00           C  
ATOM   1622  O3'  DA A  51     -25.626  16.675   3.360  6.00  0.00           O  
ATOM   1623  C2'  DA A  51     -25.952  19.066   4.050  4.00  0.00           C  
ATOM   1624  C1'  DA A  51     -24.559  19.243   4.670  3.00  0.00           C  
ATOM   1625  N1   DA A  51     -22.947  21.507   9.000  6.00  0.00           N  
ATOM   1626  C2   DA A  51     -23.079  20.232   8.690  0.00  0.00           C  
ATOM   1627  N3   DA A  51     -23.547  19.770   7.540  3.00  0.00           N  
ATOM   1628  C4   DA A  51     -23.875  20.746   6.650  0.00  0.00           C  
ATOM   1629  C5   DA A  51     -23.785  22.103   6.870  7.00  0.00           C  
ATOM   1630  C6   DA A  51     -23.183  22.432   8.130  3.00  0.00           C  
ATOM   1631  N6   DA A  51     -22.871  23.663   8.620  3.00  0.00           N  
ATOM   1632  N7   DA A  51     -24.301  22.761   5.760  2.00  0.00           N  
ATOM   1633  C8   DA A  51     -24.638  21.838   4.880  6.00  0.00           C  
ATOM   1634  N9   DA A  51     -24.409  20.589   5.380  4.00  0.00           N  
ATOM   1635  OP1  DA A  51     -25.435  21.340  -0.860  6.00  0.00           O  
ATOM   1636  OP2  DA A  51     -25.679  23.079   1.040  7.00  0.00           O1-
ATOM   1637  H2   DA A  51     -22.692  19.528   9.400  0.00  0.00           H  
ATOM   1638  H8   DA A  51     -25.119  22.057   3.920  5.00  0.00           H  
ATOM   1639  H1'  DA A  51     -24.329  18.433   5.430  9.00  0.00           H  
ATOM   1640  H2'  DA A  51     -26.258  20.036   3.670  7.00  0.00           H  
ATOM   1641  H3'  DA A  51     -26.458  18.232   2.120  9.00  0.00           H  
ATOM   1642  H4'  DA A  51     -23.702  17.607   2.300  9.00  0.00           H  
ATOM   1643  H5'  DA A  51     -23.177  19.818   0.990  7.00  0.00           H  
ATOM   1644  H61  DA A  51     -22.497  23.743   9.550  4.00  0.00           H  
ATOM   1645  H62  DA A  51     -23.167  24.386   7.990  4.00  0.00           H  
ATOM   1646 H2''  DA A  51     -26.735  18.696   4.740  3.00  0.00           H  
ATOM   1647 H5''  DA A  51     -24.662  19.039   0.280  6.00  0.00           H  
ATOM   1648  P    DC A  52     -26.819  15.975   4.010  7.00  0.00           P  
ATOM   1649  C5'  DC A  52     -26.382  15.676   6.650  8.00  0.00           C  
ATOM   1650  O5'  DC A  52     -26.949  16.359   5.530  0.00  0.00           O  
ATOM   1651  C4'  DC A  52     -26.772  16.448   7.930  4.00  0.00           C  
ATOM   1652  O4'  DC A  52     -26.378  17.808   7.900  4.00  0.00           O  
ATOM   1653  C3'  DC A  52     -28.277  16.470   8.340  6.00  0.00           C  
ATOM   1654  O3'  DC A  52     -28.475  15.736   9.540  5.00  0.00           O  
ATOM   1655  C2'  DC A  52     -28.390  17.968   8.650  5.00  0.00           C  
ATOM   1656  C1'  DC A  52     -26.983  18.452   8.940  5.00  0.00           C  
ATOM   1657  N1   DC A  52     -26.903  19.881   8.860  6.00  0.00           N  
ATOM   1658  C2   DC A  52     -26.166  20.531   9.860  2.00  0.00           C  
ATOM   1659  O2   DC A  52     -25.581  19.874  10.750  3.00  0.00           O  
ATOM   1660  N3   DC A  52     -26.025  21.932   9.830  7.00  0.00           N  
ATOM   1661  C4   DC A  52     -26.496  22.557   8.750  2.00  0.00           C  
ATOM   1662  N4   DC A  52     -26.174  23.863   8.690  8.00  0.00           N  
ATOM   1663  C5   DC A  52     -27.132  21.912   7.670  4.00  0.00           C  
ATOM   1664  C6   DC A  52     -27.319  20.594   7.750  3.00  0.00           C  
ATOM   1665  OP1  DC A  52     -26.505  14.498   3.970  6.00  0.00           O  
ATOM   1666  OP2  DC A  52     -28.056  16.436   3.370  1.00  0.00           O1-
ATOM   1667  H5   DC A  52     -27.620  22.368   6.860  1.00  0.00           H  
ATOM   1668  H6   DC A  52     -27.781  20.031   6.940  2.00  0.00           H  
ATOM   1669  H1'  DC A  52     -26.675  18.107   9.930  9.00  0.00           H  
ATOM   1670  H2'  DC A  52     -28.863  18.459   7.820  8.00  0.00           H  
ATOM   1671  H3'  DC A  52     -28.976  16.119   7.640  2.00  0.00           H  
ATOM   1672  H4'  DC A  52     -26.250  16.036   8.800  6.00  0.00           H  
ATOM   1673  H41  DC A  52     -25.623  24.299   9.380  6.00  0.00           H  
ATOM   1674  H5'  DC A  52     -25.241  15.670   6.580  2.00  0.00           H  
ATOM   1675  H42  DC A  52     -26.353  24.274   7.750  2.00  0.00           H  
ATOM   1676 H2''  DC A  52     -28.977  18.214   9.580  9.00  0.00           H  
ATOM   1677 H5''  DC A  52     -26.683  14.626   6.740  7.00  0.00           H  
ATOM   1678  P    DC A  53     -29.744  15.652  10.430  0.00  0.00           P  
ATOM   1679  C5'  DC A  53     -28.587  16.621  12.630  5.00  0.00           C  
ATOM   1680  O5'  DC A  53     -29.572  16.769  11.610  9.00  0.00           O  
ATOM   1681  C4'  DC A  53     -28.531  17.865  13.430  8.00  0.00           C  
ATOM   1682  O4'  DC A  53     -28.201  19.061  12.740  6.00  0.00           O  
ATOM   1683  C3'  DC A  53     -29.931  18.157  14.030  7.00  0.00           C  
ATOM   1684  O3'  DC A  53     -29.966  18.505  15.370  3.00  0.00           O  
ATOM   1685  C2'  DC A  53     -30.321  19.403  13.360  3.00  0.00           C  
ATOM   1686  C1'  DC A  53     -28.947  20.044  13.320  9.00  0.00           C  
ATOM   1687  N1   DC A  53     -28.879  21.193  12.410  2.00  0.00           N  
ATOM   1688  C2   DC A  53     -28.329  22.377  12.860  3.00  0.00           C  
ATOM   1689  O2   DC A  53     -27.930  22.455  13.990  1.00  0.00           O  
ATOM   1690  N3   DC A  53     -28.221  23.499  12.130  6.00  0.00           N  
ATOM   1691  C4   DC A  53     -28.804  23.495  10.910  3.00  0.00           C  
ATOM   1692  N4   DC A  53     -28.804  24.582  10.280  6.00  0.00           N  
ATOM   1693  C5   DC A  53     -29.397  22.314  10.340  9.00  0.00           C  
ATOM   1694  C6   DC A  53     -29.490  21.193  11.130  8.00  0.00           C  
ATOM   1695  OP1  DC A  53     -29.711  14.325  11.020  6.00  0.00           O  
ATOM   1696  OP2  DC A  53     -30.939  15.949   9.590  7.00  0.00           O1-
ATOM   1697  H5   DC A  53     -29.877  22.330   9.370  3.00  0.00           H  
ATOM   1698  H6   DC A  53     -30.031  20.232  10.850  1.00  0.00           H  
ATOM   1699  H1'  DC A  53     -28.637  20.357  14.290  4.00  0.00           H  
ATOM   1700  H2'  DC A  53     -30.650  19.122  12.390  9.00  0.00           H  
ATOM   1701  H3'  DC A  53     -30.642  17.311  13.910  9.00  0.00           H  
ATOM   1702  H4'  DC A  53     -27.854  17.756  14.260  2.00  0.00           H  
ATOM   1703  H41  DC A  53     -28.399  25.356  10.790  4.00  0.00           H  
ATOM   1704  H5'  DC A  53     -27.558  16.438  12.290  2.00  0.00           H  
ATOM   1705  H42  DC A  53     -29.412  24.724   9.520  0.00  0.00           H  
ATOM   1706 H2''  DC A  53     -31.001  20.068  13.880  3.00  0.00           H  
ATOM   1707 H5''  DC A  53     -28.875  15.792  13.250  0.00  0.00           H  
ATOM   1708  P    DC A  54     -31.147  18.303  16.510  3.00  0.00           P  
ATOM   1709  C5'  DC A  54     -30.289  20.241  18.310  0.00  0.00           C  
ATOM   1710  O5'  DC A  54     -31.296  19.663  17.390  3.00  0.00           O  
ATOM   1711  C4'  DC A  54     -30.526  21.722  18.600  9.00  0.00           C  
ATOM   1712  O4'  DC A  54     -30.247  22.580  17.480  1.00  0.00           O  
ATOM   1713  C3'  DC A  54     -31.951  22.045  19.080  6.00  0.00           C  
ATOM   1714  O3'  DC A  54     -31.976  22.464  20.390  2.00  0.00           O  
ATOM   1715  C2'  DC A  54     -32.441  23.104  18.120  8.00  0.00           C  
ATOM   1716  C1'  DC A  54     -31.180  23.654  17.460  4.00  0.00           C  
ATOM   1717  N1   DC A  54     -31.277  24.022  16.020  6.00  0.00           N  
ATOM   1718  C2   DC A  54     -31.313  25.402  15.690  5.00  0.00           C  
ATOM   1719  O2   DC A  54     -31.052  26.266  16.540  6.00  0.00           O  
ATOM   1720  N3   DC A  54     -31.394  25.742  14.420  5.00  0.00           N  
ATOM   1721  C4   DC A  54     -31.522  24.881  13.480  4.00  0.00           C  
ATOM   1722  N4   DC A  54     -31.549  25.349  12.300  9.00  0.00           N  
ATOM   1723  C5   DC A  54     -31.615  23.494  13.730  7.00  0.00           C  
ATOM   1724  C6   DC A  54     -31.514  23.135  15.040  6.00  0.00           C  
ATOM   1725  OP1  DC A  54     -30.649  17.273  17.460  2.00  0.00           O  
ATOM   1726  OP2  DC A  54     -32.424  18.012  15.880  4.00  0.00           O1-
ATOM   1727  H5   DC A  54     -31.776  22.713  12.940  6.00  0.00           H  
ATOM   1728  H6   DC A  54     -31.627  22.022  15.230  8.00  0.00           H  
ATOM   1729  H1'  DC A  54     -30.810  24.559  17.960  6.00  0.00           H  
ATOM   1730  H2'  DC A  54     -33.082  22.662  17.320  8.00  0.00           H  
ATOM   1731  H3'  DC A  54     -32.553  21.155  18.990  7.00  0.00           H  
ATOM   1732  H4'  DC A  54     -29.843  21.985  19.400  8.00  0.00           H  
ATOM   1733  H41  DC A  54     -31.638  26.360  12.310  7.00  0.00           H  
ATOM   1734  H5'  DC A  54     -29.263  20.042  17.930  1.00  0.00           H  
ATOM   1735  H42  DC A  54     -31.623  24.781  11.490  5.00  0.00           H  
ATOM   1736 H2''  DC A  54     -33.043  23.943  18.560  2.00  0.00           H  
ATOM   1737 H5''  DC A  54     -30.302  19.732  19.260  8.00  0.00           H  
ATOM   1738  P    DT A  55     -33.345  22.352  21.270  4.00  0.00           P  
ATOM   1739  C5'  DT A  55     -33.875  24.991  21.450  3.00  0.00           C  
ATOM   1740  O5'  DT A  55     -34.206  23.728  20.880  3.00  0.00           O  
ATOM   1741  C4'  DT A  55     -34.425  26.251  20.780  8.00  0.00           C  
ATOM   1742  O4'  DT A  55     -33.929  26.360  19.430  3.00  0.00           O  
ATOM   1743  C3'  DT A  55     -35.908  26.345  20.800  1.00  0.00           C  
ATOM   1744  O3'  DT A  55     -36.306  27.645  21.070  5.00  0.00           O  
ATOM   1745  C2'  DT A  55     -36.257  26.029  19.350  0.00  0.00           C  
ATOM   1746  C1'  DT A  55     -35.077  26.803  18.700  0.00  0.00           C  
ATOM   1747  N1   DT A  55     -34.816  26.501  17.250  5.00  0.00           N  
ATOM   1748  C2   DT A  55     -34.601  27.639  16.480  0.00  0.00           C  
ATOM   1749  O2   DT A  55     -34.432  28.767  16.990  3.00  0.00           O  
ATOM   1750  N3   DT A  55     -34.564  27.524  15.090  2.00  0.00           N  
ATOM   1751  C4   DT A  55     -34.660  26.415  14.420  2.00  0.00           C  
ATOM   1752  O4   DT A  55     -34.628  26.452  13.210  0.00  0.00           O  
ATOM   1753  C5   DT A  55     -34.886  25.233  15.240  8.00  0.00           C  
ATOM   1754  C6   DT A  55     -34.989  25.339  16.640  2.00  0.00           C  
ATOM   1755  C7   DT A  55     -34.870  23.845  14.650  2.00  0.00           C  
ATOM   1756  OP1  DT A  55     -32.892  22.463  22.680  8.00  0.00           O  
ATOM   1757  OP2  DT A  55     -34.056  21.068  20.950  1.00  0.00           O1-
ATOM   1758  H3   DT A  55     -34.488  28.356  14.500  3.00  0.00           H  
ATOM   1759  H6   DT A  55     -34.935  24.477  17.240  6.00  0.00           H  
ATOM   1760  H1'  DT A  55     -35.147  27.858  18.920  7.00  0.00           H  
ATOM   1761  H2'  DT A  55     -36.228  25.008  19.090  6.00  0.00           H  
ATOM   1762  H3'  DT A  55     -36.310  25.583  21.450  6.00  0.00           H  
ATOM   1763  H4'  DT A  55     -34.003  27.068  21.500  0.00  0.00           H  
ATOM   1764  H5'  DT A  55     -32.844  25.057  21.410  0.00  0.00           H  
ATOM   1765  H71  DT A  55     -34.415  23.097  15.320  3.00  0.00           H  
ATOM   1766  H72  DT A  55     -35.875  23.559  14.400  7.00  0.00           H  
ATOM   1767  H73  DT A  55     -34.245  23.864  13.770  4.00  0.00           H  
ATOM   1768 H2''  DT A  55     -37.127  26.464  18.940  0.00  0.00           H  
ATOM   1769 H5''  DT A  55     -34.246  25.126  22.440  9.00  0.00           H  
ATOM   1770  P    DA A  56     -36.756  27.838  22.520  7.00  0.00           P  
ATOM   1771  C5'  DA A  56     -35.736  30.374  22.770  1.00  0.00           C  
ATOM   1772  O5'  DA A  56     -36.865  29.473  22.700  6.00  0.00           O  
ATOM   1773  C4'  DA A  56     -35.877  31.550  21.800  8.00  0.00           C  
ATOM   1774  O4'  DA A  56     -35.638  31.106  20.500  4.00  0.00           O  
ATOM   1775  C3'  DA A  56     -37.173  32.311  21.790  4.00  0.00           C  
ATOM   1776  O3'  DA A  56     -36.899  33.661  21.820  5.00  0.00           O  
ATOM   1777  C2'  DA A  56     -37.859  31.943  20.470  0.00  0.00           C  
ATOM   1778  C1'  DA A  56     -36.602  31.686  19.660  5.00  0.00           C  
ATOM   1779  N1   DA A  56     -36.938  31.044  14.620  3.00  0.00           N  
ATOM   1780  C2   DA A  56     -36.426  32.057  15.370  5.00  0.00           C  
ATOM   1781  N3   DA A  56     -36.307  32.101  16.650  2.00  0.00           N  
ATOM   1782  C4   DA A  56     -36.833  30.945  17.290  3.00  0.00           C  
ATOM   1783  C5   DA A  56     -37.330  29.804  16.660  9.00  0.00           C  
ATOM   1784  C6   DA A  56     -37.349  29.948  15.270  2.00  0.00           C  
ATOM   1785  N6   DA A  56     -37.776  29.012  14.390  2.00  0.00           N  
ATOM   1786  N7   DA A  56     -37.867  28.905  17.630  1.00  0.00           N  
ATOM   1787  C8   DA A  56     -37.584  29.468  18.730  9.00  0.00           C  
ATOM   1788  N9   DA A  56     -36.932  30.658  18.620  0.00  0.00           N  
ATOM   1789  OP1  DA A  56     -35.728  27.259  23.430  9.00  0.00           O  
ATOM   1790  OP2  DA A  56     -38.113  27.322  22.640  8.00  0.00           O1-
ATOM   1791  H2   DA A  56     -36.238  33.003  14.930  4.00  0.00           H  
ATOM   1792  H8   DA A  56     -37.920  29.049  19.710  7.00  0.00           H  
ATOM   1793  H1'  DA A  56     -36.196  32.637  19.240  5.00  0.00           H  
ATOM   1794  H2'  DA A  56     -38.478  31.033  20.570  6.00  0.00           H  
ATOM   1795  H3'  DA A  56     -37.761  31.925  22.660  2.00  0.00           H  
ATOM   1796  H4'  DA A  56     -35.128  32.289  22.020  1.00  0.00           H  
ATOM   1797  H5'  DA A  56     -34.750  29.898  22.490  2.00  0.00           H  
ATOM   1798  H61  DA A  56     -37.688  29.216  13.460  1.00  0.00           H  
ATOM   1799  H62  DA A  56     -38.065  28.094  14.720  5.00  0.00           H  
ATOM   1800 H2''  DA A  56     -38.375  32.841  20.040  8.00  0.00           H  
ATOM   1801 H5''  DA A  56     -35.597  30.723  23.780  1.00  0.00           H  
ATOM   1802  P    DA A  57     -37.951  34.859  21.910  1.00  0.00           P  
ATOM   1803  C5'  DA A  57     -37.597  35.699  19.430  0.00  0.00           C  
ATOM   1804  O5'  DA A  57     -38.495  35.089  20.420  2.00  0.00           O  
ATOM   1805  C4'  DA A  57     -38.360  35.986  18.070  0.00  0.00           C  
ATOM   1806  O4'  DA A  57     -38.362  34.846  17.190  8.00  0.00           O  
ATOM   1807  C3'  DA A  57     -39.755  36.560  18.180  5.00  0.00           C  
ATOM   1808  O3'  DA A  57     -39.893  37.596  17.290  3.00  0.00           O  
ATOM   1809  C2'  DA A  57     -40.603  35.309  17.870  8.00  0.00           C  
ATOM   1810  C1'  DA A  57     -39.693  34.688  16.770  7.00  0.00           C  
ATOM   1811  N1   DA A  57     -40.885  31.121  13.340  7.00  0.00           N  
ATOM   1812  C2   DA A  57     -40.411  32.325  13.230  8.00  0.00           C  
ATOM   1813  N3   DA A  57     -40.130  33.146  14.230  1.00  0.00           N  
ATOM   1814  C4   DA A  57     -40.158  32.586  15.410  8.00  0.00           C  
ATOM   1815  C5   DA A  57     -40.601  31.289  15.750  5.00  0.00           C  
ATOM   1816  C6   DA A  57     -41.039  30.607  14.590  1.00  0.00           C  
ATOM   1817  N6   DA A  57     -41.520  29.365  14.570  0.00  0.00           N  
ATOM   1818  N7   DA A  57     -40.596  31.082  17.120  0.00  0.00           N  
ATOM   1819  C8   DA A  57     -40.326  32.264  17.570  2.00  0.00           C  
ATOM   1820  N9   DA A  57     -39.985  33.223  16.640  0.00  0.00           N  
ATOM   1821  OP1  DA A  57     -37.163  36.052  22.270  7.00  0.00           O  
ATOM   1822  OP2  DA A  57     -39.073  34.456  22.820  2.00  0.00           O1-
ATOM   1823  H2   DA A  57     -40.372  32.671  12.180  9.00  0.00           H  
ATOM   1824  H8   DA A  57     -40.136  32.432  18.600  8.00  0.00           H  
ATOM   1825  H1'  DA A  57     -39.873  35.191  15.850  0.00  0.00           H  
ATOM   1826  H2'  DA A  57     -40.636  34.670  18.780  0.00  0.00           H  
ATOM   1827  H3'  DA A  57     -39.917  36.862  19.220  9.00  0.00           H  
ATOM   1828  H4'  DA A  57     -37.755  36.751  17.530  6.00  0.00           H  
ATOM   1829  H5'  DA A  57     -36.719  35.060  19.390  9.00  0.00           H  
ATOM   1830  H61  DA A  57     -41.814  28.890  13.700  1.00  0.00           H  
ATOM   1831  H62  DA A  57     -41.613  28.919  15.420  0.00  0.00           H  
ATOM   1832 H2''  DA A  57     -41.539  35.510  17.510  3.00  0.00           H  
ATOM   1833 H5''  DA A  57     -37.180  36.626  19.760  1.00  0.00           H  
ATOM   1834  P    DC A  58     -41.167  38.443  16.910  6.00  0.00           P  
ATOM   1835  C5'  DC A  58     -40.664  37.992  14.390  1.00  0.00           C  
ATOM   1836  O5'  DC A  58     -41.564  37.942  15.500  4.00  0.00           O  
ATOM   1837  C4'  DC A  58     -41.303  37.429  13.130  7.00  0.00           C  
ATOM   1838  O4'  DC A  58     -41.711  36.092  13.380  4.00  0.00           O  
ATOM   1839  C3'  DC A  58     -42.543  38.205  12.710  2.00  0.00           C  
ATOM   1840  O3'  DC A  58     -42.699  38.279  11.320  4.00  0.00           O  
ATOM   1841  C2'  DC A  58     -43.658  37.479  13.410  0.00  0.00           C  
ATOM   1842  C1'  DC A  58     -43.049  36.064  13.160  1.00  0.00           C  
ATOM   1843  N1   DC A  58     -43.740  34.988  13.920  2.00  0.00           N  
ATOM   1844  C2   DC A  58     -44.606  34.138  13.230  9.00  0.00           C  
ATOM   1845  O2   DC A  58     -44.869  34.408  12.090  8.00  0.00           O  
ATOM   1846  N3   DC A  58     -45.020  32.990  13.800  4.00  0.00           N  
ATOM   1847  C4   DC A  58     -44.660  32.767  15.070  2.00  0.00           C  
ATOM   1848  N4   DC A  58     -45.046  31.686  15.540  0.00  0.00           N  
ATOM   1849  C5   DC A  58     -43.925  33.701  15.900  4.00  0.00           C  
ATOM   1850  C6   DC A  58     -43.516  34.874  15.260  7.00  0.00           C  
ATOM   1851  OP1  DC A  58     -40.756  39.873  16.840  7.00  0.00           O  
ATOM   1852  OP2  DC A  58     -42.259  38.086  17.830  8.00  0.00           O1-
ATOM   1853  H5   DC A  58     -43.667  33.479  16.950  8.00  0.00           H  
ATOM   1854  H6   DC A  58     -42.870  35.597  15.810  9.00  0.00           H  
ATOM   1855  H1'  DC A  58     -43.143  35.825  12.120  7.00  0.00           H  
ATOM   1856  H2'  DC A  58     -43.802  37.679  14.460  4.00  0.00           H  
ATOM   1857  H3'  DC A  58     -42.448  39.148  13.150  9.00  0.00           H  
ATOM   1858  H4'  DC A  58     -40.538  37.484  12.340  6.00  0.00           H  
ATOM   1859  H41  DC A  58     -45.466  31.046  14.860  1.00  0.00           H  
ATOM   1860  H5'  DC A  58     -39.715  37.439  14.600  3.00  0.00           H  
ATOM   1861  H42  DC A  58     -44.602  31.265  16.380  2.00  0.00           H  
ATOM   1862 H2''  DC A  58     -44.653  37.792  12.890  1.00  0.00           H  
ATOM   1863 H5''  DC A  58     -40.418  38.990  14.150  8.00  0.00           H  
ATOM   1864  P    DC A  59     -42.077  39.462  10.440  9.00  0.00           P  
ATOM   1865  C5'  DC A  59     -42.884  41.885  10.180  3.00  0.00           C  
ATOM   1866  O5'  DC A  59     -43.121  40.596  10.740  1.00  0.00           O  
ATOM   1867  C4'  DC A  59     -43.956  42.908  10.680  0.00  0.00           C  
ATOM   1868  O4'  DC A  59     -45.174  42.515  10.120  6.00  0.00           O  
ATOM   1869  C3'  DC A  59     -44.146  42.870  12.230  7.00  0.00           C  
ATOM   1870  O3'  DC A  59     -44.453  44.054  12.890  5.00  0.00           O  
ATOM   1871  C2'  DC A  59     -45.388  41.982  12.400  5.00  0.00           C  
ATOM   1872  C1'  DC A  59     -46.126  42.345  11.160  0.00  0.00           C  
ATOM   1873  N1   DC A  59     -46.980  41.259  10.680  0.00  0.00           N  
ATOM   1874  C2   DC A  59     -48.361  41.334  10.930  7.00  0.00           C  
ATOM   1875  O2   DC A  59     -48.863  42.242  11.510  7.00  0.00           O  
ATOM   1876  N3   DC A  59     -49.205  40.311  10.560  4.00  0.00           N  
ATOM   1877  C4   DC A  59     -48.664  39.270  10.030  3.00  0.00           C  
ATOM   1878  N4   DC A  59     -49.445  38.273   9.650  1.00  0.00           N  
ATOM   1879  C5   DC A  59     -47.233  39.111   9.880  1.00  0.00           C  
ATOM   1880  C6   DC A  59     -46.420  40.117  10.180  1.00  0.00           C  
ATOM   1881  OP1  DC A  59     -42.214  38.981   9.050  6.00  0.00           O  
ATOM   1882  OP2  DC A  59     -40.754  39.805  10.960  2.00  0.00           O1-
ATOM   1883  H5   DC A  59     -46.841  38.165   9.460  5.00  0.00           H  
ATOM   1884  H6   DC A  59     -45.357  40.025   9.970  6.00  0.00           H  
ATOM   1885  H1'  DC A  59     -46.649  43.302  11.270  2.00  0.00           H  
ATOM   1886  H2'  DC A  59     -44.980  41.015  12.470  5.00  0.00           H  
ATOM   1887  H3'  DC A  59     -43.255  42.422  12.670  2.00  0.00           H  
ATOM   1888  H4'  DC A  59     -43.612  43.904  10.340  5.00  0.00           H  
ATOM   1889  H41  DC A  59     -50.461  38.334   9.730  5.00  0.00           H  
ATOM   1890  H5'  DC A  59     -42.807  41.852   9.050  0.00  0.00           H  
ATOM   1891  H42  DC A  59     -49.040  37.490   9.110  4.00  0.00           H  
ATOM   1892 H2''  DC A  59     -45.949  42.283  13.260  8.00  0.00           H  
ATOM   1893 H5''  DC A  59     -42.015  42.365  10.670  6.00  0.00           H  
ATOM   1894  P    DC A  60     -43.630  44.604  14.090  1.00  0.00           P  
ATOM   1895  C5'  DC A  60     -43.801  46.996  15.200  0.00  0.00           C  
ATOM   1896  O5'  DC A  60     -44.414  45.983  14.500  4.00  0.00           O  
ATOM   1897  C4'  DC A  60     -44.709  48.058  15.900  4.00  0.00           C  
ATOM   1898  O4'  DC A  60     -45.540  48.667  15.020  8.00  0.00           O  
ATOM   1899  C3'  DC A  60     -45.563  47.566  17.060  5.00  0.00           C  
ATOM   1900  O3'  DC A  60     -45.710  48.512  18.130  3.00  0.00           O  
ATOM   1901  C2'  DC A  60     -46.822  47.254  16.290  0.00  0.00           C  
ATOM   1902  C1'  DC A  60     -46.932  48.440  15.370  9.00  0.00           C  
ATOM   1903  N1   DC A  60     -47.744  48.223  14.180  4.00  0.00           N  
ATOM   1904  C2   DC A  60     -49.107  48.545  14.130  2.00  0.00           C  
ATOM   1905  O2   DC A  60     -49.625  49.218  15.090  5.00  0.00           O  
ATOM   1906  N3   DC A  60     -49.888  48.050  13.140  6.00  0.00           N  
ATOM   1907  C4   DC A  60     -49.336  47.422  12.150  3.00  0.00           C  
ATOM   1908  N4   DC A  60     -50.161  46.942  11.300  3.00  0.00           N  
ATOM   1909  C5   DC A  60     -47.927  47.123  12.140  4.00  0.00           C  
ATOM   1910  C6   DC A  60     -47.194  47.462  13.180  4.00  0.00           C  
ATOM   1911  OP1  DC A  60     -42.292  44.928  13.650  9.00  0.00           O  
ATOM   1912  OP2  DC A  60     -43.808  43.666  15.160  1.00  0.00           O1-
ATOM   1913  H5   DC A  60     -47.529  46.590  11.350  7.00  0.00           H  
ATOM   1914  H6   DC A  60     -46.178  47.299  13.170  3.00  0.00           H  
ATOM   1915  H1'  DC A  60     -47.332  49.317  15.910  7.00  0.00           H  
ATOM   1916  H2'  DC A  60     -46.729  46.359  15.620  7.00  0.00           H  
ATOM   1917  H3'  DC A  60     -45.136  46.610  17.440  8.00  0.00           H  
ATOM   1918  H4'  DC A  60     -43.949  48.748  16.190  1.00  0.00           H  
ATOM   1919  H41  DC A  60     -51.065  47.427  11.460  0.00  0.00           H  
ATOM   1920  H5'  DC A  60     -43.315  47.592  14.510  2.00  0.00           H  
ATOM   1921  H42  DC A  60     -50.051  46.148  10.660  4.00  0.00           H  
ATOM   1922 H2''  DC A  60     -47.699  47.162  16.910  4.00  0.00           H  
ATOM   1923 H5''  DC A  60     -43.234  46.479  15.990  3.00  0.00           H  
ATOM   1924  P    DT A  61     -46.028  48.117  19.670  5.00  0.00           P  
ATOM   1925  C5'  DT A  61     -48.567  48.529  19.830  0.00  0.00           C  
ATOM   1926  O5'  DT A  61     -47.508  47.613  19.790  3.00  0.00           O  
ATOM   1927  C4'  DT A  61     -49.931  48.029  19.920  3.00  0.00           C  
ATOM   1928  O4'  DT A  61     -50.826  49.135  20.190  3.00  0.00           O  
ATOM   1929  C3'  DT A  61     -50.541  47.402  18.700  7.00  0.00           C  
ATOM   1930  O3'  DT A  61     -51.675  46.732  19.110  6.00  0.00           O  
ATOM   1931  C2'  DT A  61     -51.035  48.669  17.910  6.00  0.00           C  
ATOM   1932  C1'  DT A  61     -51.647  49.493  19.070  1.00  0.00           C  
ATOM   1933  N1   DT A  61     -51.701  50.863  18.670  8.00  0.00           N  
ATOM   1934  C2   DT A  61     -52.913  51.336  18.170  6.00  0.00           C  
ATOM   1935  O2   DT A  61     -53.909  50.664  17.980  5.00  0.00           O  
ATOM   1936  N3   DT A  61     -53.075  52.682  17.900  7.00  0.00           N  
ATOM   1937  C4   DT A  61     -52.062  53.620  18.070  0.00  0.00           C  
ATOM   1938  O4   DT A  61     -52.244  54.812  17.920  8.00  0.00           O  
ATOM   1939  C5   DT A  61     -50.803  53.062  18.480  1.00  0.00           C  
ATOM   1940  C6   DT A  61     -50.610  51.719  18.720  2.00  0.00           C  
ATOM   1941  C7   DT A  61     -49.614  53.999  18.600  5.00  0.00           C  
ATOM   1942  OP1  DT A  61     -45.867  49.310  20.530  3.00  0.00           O  
ATOM   1943  OP2  DT A  61     -45.127  46.975  19.970  9.00  0.00           O1-
ATOM   1944  H3   DT A  61     -53.931  52.964  17.410  6.00  0.00           H  
ATOM   1945  H6   DT A  61     -49.577  51.381  18.970  5.00  0.00           H  
ATOM   1946  H1'  DT A  61     -52.646  49.061  19.300  8.00  0.00           H  
ATOM   1947  H2'  DT A  61     -50.220  49.239  17.500  7.00  0.00           H  
ATOM   1948  H3'  DT A  61     -49.881  46.777  18.070  6.00  0.00           H  
ATOM   1949  H4'  DT A  61     -49.974  47.347  20.790  8.00  0.00           H  
ATOM   1950  H5'  DT A  61     -48.536  49.256  19.020  3.00  0.00           H  
ATOM   1951  H71  DT A  61     -49.556  54.553  17.760  9.00  0.00           H  
ATOM   1952  H72  DT A  61     -48.692  53.417  18.740  8.00  0.00           H  
ATOM   1953  H73  DT A  61     -49.811  54.693  19.370  1.00  0.00           H  
ATOM   1954 H2''  DT A  61     -51.703  48.486  17.070  8.00  0.00           H  
ATOM   1955 H5''  DT A  61     -48.449  49.148  20.710  1.00  0.00           H  
ATOM   1956  P    DA A  62     -51.686  45.144  19.170  5.00  0.00           P  
ATOM   1957  C5'  DA A  62     -52.684  44.923  16.780  8.00  0.00           C  
ATOM   1958  O5'  DA A  62     -51.663  44.568  17.680  7.00  0.00           O  
ATOM   1959  C4'  DA A  62     -52.554  44.120  15.540  7.00  0.00           C  
ATOM   1960  O4'  DA A  62     -53.315  44.706  14.510  6.00  0.00           O  
ATOM   1961  C3'  DA A  62     -51.161  43.839  14.950  5.00  0.00           C  
ATOM   1962  O3'  DA A  62     -50.986  42.647  14.180  9.00  0.00           O  
ATOM   1963  C2'  DA A  62     -51.196  44.966  13.910  3.00  0.00           C  
ATOM   1964  C1'  DA A  62     -52.589  44.795  13.330  6.00  0.00           C  
ATOM   1965  N1   DA A  62     -55.090  46.201   8.960  9.00  0.00           N  
ATOM   1966  C2   DA A  62     -54.702  44.986   9.480  5.00  0.00           C  
ATOM   1967  N3   DA A  62     -53.911  44.736  10.560  7.00  0.00           N  
ATOM   1968  C4   DA A  62     -53.688  45.841  11.260  2.00  0.00           C  
ATOM   1969  C5   DA A  62     -54.082  47.128  10.910  8.00  0.00           C  
ATOM   1970  C6   DA A  62     -54.840  47.262   9.720  5.00  0.00           C  
ATOM   1971  N6   DA A  62     -55.231  48.410   9.250  9.00  0.00           N  
ATOM   1972  N7   DA A  62     -53.542  48.006  11.830  9.00  0.00           N  
ATOM   1973  C8   DA A  62     -53.051  47.268  12.800  8.00  0.00           C  
ATOM   1974  N9   DA A  62     -53.117  45.922  12.520  9.00  0.00           N  
ATOM   1975  OP1  DA A  62     -52.990  44.771  19.740  9.00  0.00           O  
ATOM   1976  OP2  DA A  62     -50.439  44.733  19.910  7.00  0.00           O1-
ATOM   1977  H2   DA A  62     -55.001  44.164   8.840  4.00  0.00           H  
ATOM   1978  H8   DA A  62     -52.618  47.596  13.740  5.00  0.00           H  
ATOM   1979  H1'  DA A  62     -52.627  43.836  12.750  8.00  0.00           H  
ATOM   1980  H2'  DA A  62     -51.097  45.869  14.450  3.00  0.00           H  
ATOM   1981  H3'  DA A  62     -50.338  44.039  15.690  0.00  0.00           H  
ATOM   1982  H4'  DA A  62     -52.996  43.139  15.750  5.00  0.00           H  
ATOM   1983  H5'  DA A  62     -52.534  45.956  16.500  1.00  0.00           H  
ATOM   1984  H61  DA A  62     -55.660  48.473   8.270  4.00  0.00           H  
ATOM   1985  H62  DA A  62     -55.085  49.197   9.890  8.00  0.00           H  
ATOM   1986 H2''  DA A  62     -50.389  44.959  13.130  8.00  0.00           H  
ATOM   1987 H5''  DA A  62     -53.668  44.849  17.270  4.00  0.00           H  
ATOM   1988  P    DA A  63     -50.281  41.312  14.750  3.00  0.00           P  
ATOM   1989  C5'  DA A  63     -50.618  41.195  17.460  5.00  0.00           C  
ATOM   1990  O5'  DA A  63     -51.048  40.863  16.110  9.00  0.00           O  
ATOM   1991  C4'  DA A  63     -51.800  41.049  18.440  1.00  0.00           C  
ATOM   1992  O4'  DA A  63     -53.039  41.578  17.840  0.00  0.00           O  
ATOM   1993  C3'  DA A  63     -52.187  39.579  18.770  0.00  0.00           C  
ATOM   1994  O3'  DA A  63     -52.900  39.402  20.030  1.00  0.00           O  
ATOM   1995  C2'  DA A  63     -53.045  39.302  17.520  5.00  0.00           C  
ATOM   1996  C1'  DA A  63     -53.878  40.511  17.440  0.00  0.00           C  
ATOM   1997  N1   DA A  63     -57.728  42.676  14.930  2.00  0.00           N  
ATOM   1998  C2   DA A  63     -57.508  42.527  16.220  9.00  0.00           C  
ATOM   1999  N3   DA A  63     -56.540  41.832  16.830  8.00  0.00           N  
ATOM   2000  C4   DA A  63     -55.704  41.347  15.870  1.00  0.00           C  
ATOM   2001  C5   DA A  63     -55.773  41.438  14.510  2.00  0.00           C  
ATOM   2002  C6   DA A  63     -56.920  42.123  14.060  2.00  0.00           C  
ATOM   2003  N6   DA A  63     -57.366  42.175  12.810  0.00  0.00           N  
ATOM   2004  N7   DA A  63     -54.748  40.651  13.880  8.00  0.00           N  
ATOM   2005  C8   DA A  63     -54.111  40.192  14.890  5.00  0.00           C  
ATOM   2006  N9   DA A  63     -54.489  40.702  16.090  8.00  0.00           N  
ATOM   2007  OP1  DA A  63     -48.904  41.707  15.120  1.00  0.00           O  
ATOM   2008  OP2  DA A  63     -50.518  40.293  13.730  0.00  0.00           O1-
ATOM   2009  H2   DA A  63     -58.185  42.966  16.870  1.00  0.00           H  
ATOM   2010  H8   DA A  63     -53.317  39.562  14.800  0.00  0.00           H  
ATOM   2011  H1'  DA A  63     -54.566  40.287  18.200  7.00  0.00           H  
ATOM   2012  H2'  DA A  63     -52.455  39.193  16.690  6.00  0.00           H  
ATOM   2013  H3'  DA A  63     -51.245  38.988  18.710  0.00  0.00           H  
ATOM   2014  H4'  DA A  63     -51.506  41.551  19.320  9.00  0.00           H  
ATOM   2015  H5'  DA A  63     -50.283  42.204  17.500  9.00  0.00           H  
ATOM   2016  H61  DA A  63     -58.382  42.544  12.760  2.00  0.00           H  
ATOM   2017  H62  DA A  63     -56.920  41.643  12.040  0.00  0.00           H  
ATOM   2018 H2''  DA A  63     -53.618  38.405  17.700  7.00  0.00           H  
ATOM   2019 H5''  DA A  63     -49.781  40.574  17.870  5.00  0.00           H  
ATOM   2020  P    DC A  64     -52.149  38.843  21.340  5.00  0.00           P  
ATOM   2021  C5'  DC A  64     -52.416  36.182  21.740  9.00  0.00           C  
ATOM   2022  O5'  DC A  64     -51.682  37.318  21.180  8.00  0.00           O  
ATOM   2023  C4'  DC A  64     -51.921  34.889  21.220  3.00  0.00           C  
ATOM   2024  O4'  DC A  64     -52.134  34.820  19.850  3.00  0.00           O  
ATOM   2025  C3'  DC A  64     -50.420  34.542  21.470  4.00  0.00           C  
ATOM   2026  O3'  DC A  64     -50.442  33.129  21.940  4.00  0.00           O  
ATOM   2027  C2'  DC A  64     -49.868  34.791  20.090  1.00  0.00           C  
ATOM   2028  C1'  DC A  64     -50.994  34.235  19.170  7.00  0.00           C  
ATOM   2029  N1   DC A  64     -50.944  34.869  17.800  7.00  0.00           N  
ATOM   2030  C2   DC A  64     -51.009  34.137  16.590  7.00  0.00           C  
ATOM   2031  O2   DC A  64     -51.241  32.970  16.710  5.00  0.00           O  
ATOM   2032  N3   DC A  64     -50.732  34.577  15.370  5.00  0.00           N  
ATOM   2033  C4   DC A  64     -50.469  35.835  15.280  9.00  0.00           C  
ATOM   2034  N4   DC A  64     -49.983  36.343  14.180  4.00  0.00           N  
ATOM   2035  C5   DC A  64     -50.430  36.731  16.430  8.00  0.00           C  
ATOM   2036  C6   DC A  64     -50.667  36.202  17.660  7.00  0.00           C  
ATOM   2037  OP1  DC A  64     -53.149  38.826  22.460  5.00  0.00           O  
ATOM   2038  OP2  DC A  64     -50.836  39.588  21.520  9.00  0.00           O1-
ATOM   2039  H5   DC A  64     -50.057  37.707  16.280  1.00  0.00           H  
ATOM   2040  H6   DC A  64     -50.609  36.886  18.480  8.00  0.00           H  
ATOM   2041  H1'  DC A  64     -51.098  33.110  19.110  8.00  0.00           H  
ATOM   2042  H2'  DC A  64     -49.580  35.823  19.970  5.00  0.00           H  
ATOM   2043  H3'  DC A  64     -49.858  35.191  22.160  5.00  0.00           H  
ATOM   2044  H4'  DC A  64     -52.477  34.163  21.780  9.00  0.00           H  
ATOM   2045  H41  DC A  64     -49.812  35.639  13.390  3.00  0.00           H  
ATOM   2046  H5'  DC A  64     -53.492  36.161  21.510  8.00  0.00           H  
ATOM   2047  H42  DC A  64     -49.463  37.109  14.190  6.00  0.00           H  
ATOM   2048 H2''  DC A  64     -48.960  34.234  19.950  1.00  0.00           H  
ATOM   2049 H5''  DC A  64     -52.359  36.249  22.790  9.00  0.00           H  
ATOM   2050  P    DC A  65     -49.069  32.354  22.250  9.00  0.00           P  
ATOM   2051  C5'  DC A  65     -49.374  30.645  20.180  1.00  0.00           C  
ATOM   2052  O5'  DC A  65     -48.571  31.677  20.910  7.00  0.00           O  
ATOM   2053  C4'  DC A  65     -48.870  30.250  18.790  4.00  0.00           C  
ATOM   2054  O4'  DC A  65     -49.089  31.469  18.030  0.00  0.00           O  
ATOM   2055  C3'  DC A  65     -47.403  29.865  18.700  6.00  0.00           C  
ATOM   2056  O3'  DC A  65     -47.218  28.767  17.780  2.00  0.00           O  
ATOM   2057  C2'  DC A  65     -46.792  31.101  18.080  0.00  0.00           C  
ATOM   2058  C1'  DC A  65     -47.935  31.573  17.150  1.00  0.00           C  
ATOM   2059  N1   DC A  65     -47.744  32.954  16.680  1.00  0.00           N  
ATOM   2060  C2   DC A  65     -47.959  33.276  15.350  0.00  0.00           C  
ATOM   2061  O2   DC A  65     -48.545  32.546  14.540  2.00  0.00           O  
ATOM   2062  N3   DC A  65     -47.539  34.469  14.930  2.00  0.00           N  
ATOM   2063  C4   DC A  65     -47.103  35.390  15.770  2.00  0.00           C  
ATOM   2064  N4   DC A  65     -46.469  36.370  15.280  1.00  0.00           N  
ATOM   2065  C5   DC A  65     -46.894  35.133  17.130  7.00  0.00           C  
ATOM   2066  C6   DC A  65     -47.182  33.890  17.540  5.00  0.00           C  
ATOM   2067  OP1  DC A  65     -49.402  31.229  23.160  1.00  0.00           O  
ATOM   2068  OP2  DC A  65     -48.060  33.359  22.700  2.00  0.00           O1-
ATOM   2069  H5   DC A  65     -46.520  35.893  17.860  5.00  0.00           H  
ATOM   2070  H6   DC A  65     -47.094  33.699  18.640  1.00  0.00           H  
ATOM   2071  H1'  DC A  65     -48.181  30.907  16.340  3.00  0.00           H  
ATOM   2072  H2'  DC A  65     -46.698  31.765  18.890  8.00  0.00           H  
ATOM   2073  H3'  DC A  65     -46.984  29.537  19.600  6.00  0.00           H  
ATOM   2074  H4'  DC A  65     -49.392  29.429  18.270  9.00  0.00           H  
ATOM   2075  H41  DC A  65     -46.473  36.506  14.250  8.00  0.00           H  
ATOM   2076  H5'  DC A  65     -50.418  31.068  20.080  4.00  0.00           H  
ATOM   2077  H42  DC A  65     -45.964  36.976  15.880  7.00  0.00           H  
ATOM   2078 H2''  DC A  65     -45.831  30.837  17.670  5.00  0.00           H  
ATOM   2079 H5''  DC A  65     -49.521  29.750  20.750  3.00  0.00           H  
ATOM   2080  P    DC A  66     -46.056  27.698  17.940  1.00  0.00           P  
ATOM   2081  C5'  DC A  66     -45.646  27.597  15.390  0.00  0.00           C  
ATOM   2082  O5'  DC A  66     -46.007  26.906  16.590  5.00  0.00           O  
ATOM   2083  C4'  DC A  66     -46.657  28.672  14.920  4.00  0.00           C  
ATOM   2084  O4'  DC A  66     -45.865  29.428  14.000  8.00  0.00           O  
ATOM   2085  C3'  DC A  66     -48.057  28.326  14.380  5.00  0.00           C  
ATOM   2086  O3'  DC A  66     -48.979  29.238  15.030  5.00  0.00           O  
ATOM   2087  C2'  DC A  66     -47.807  28.608  12.940  8.00  0.00           C  
ATOM   2088  C1'  DC A  66     -46.760  29.808  13.020  3.00  0.00           C  
ATOM   2089  N1   DC A  66     -45.993  30.097  11.770  1.00  0.00           N  
ATOM   2090  C2   DC A  66     -46.013  31.336  11.160  5.00  0.00           C  
ATOM   2091  O2   DC A  66     -46.750  32.239  11.560  4.00  0.00           O  
ATOM   2092  N3   DC A  66     -45.209  31.587  10.080  2.00  0.00           N  
ATOM   2093  C4   DC A  66     -44.522  30.651   9.510  2.00  0.00           C  
ATOM   2094  N4   DC A  66     -44.016  30.817   8.320  8.00  0.00           N  
ATOM   2095  C5   DC A  66     -44.461  29.423  10.100  4.00  0.00           C  
ATOM   2096  C6   DC A  66     -45.122  29.152  11.280  4.00  0.00           C  
ATOM   2097  OP1  DC A  66     -46.497  26.821  19.000  3.00  0.00           O  
ATOM   2098  OP2  DC A  66     -44.770  28.472  18.030  1.00  0.00           O1-
ATOM   2099  H5   DC A  66     -44.010  28.610   9.480  7.00  0.00           H  
ATOM   2100  H6   DC A  66     -45.053  28.177  11.640  6.00  0.00           H  
ATOM   2101  H1'  DC A  66     -47.312  30.717  13.300  8.00  0.00           H  
ATOM   2102  H2'  DC A  66     -47.522  27.702  12.380  8.00  0.00           H  
ATOM   2103  H3'  DC A  66     -48.341  27.334  14.610  6.00  0.00           H  
ATOM   2104  H4'  DC A  66     -46.803  29.439  15.680  4.00  0.00           H  
ATOM   2105  H41  DC A  66     -43.882  31.727   8.020  0.00  0.00           H  
ATOM   2106  H5'  DC A  66     -45.575  26.854  14.650  1.00  0.00           H  
ATOM   2107  H42  DC A  66     -43.638  30.081   7.810  0.00  0.00           H  
ATOM   2108 H2''  DC A  66     -48.639  28.983  12.340  7.00  0.00           H  
ATOM   2109 H5''  DC A  66     -44.726  28.165  15.480  4.00  0.00           H  
ATOM   2110  P    DT A  67     -50.474  28.903  15.420  9.00  0.00           P  
ATOM   2111  C5'  DT A  67     -51.680  28.573  13.060  8.00  0.00           C  
ATOM   2112  O5'  DT A  67     -51.125  27.990  14.280  2.00  0.00           O  
ATOM   2113  C4'  DT A  67     -53.176  28.362  12.890  2.00  0.00           C  
ATOM   2114  O4'  DT A  67     -53.321  27.014  12.910  9.00  0.00           O  
ATOM   2115  C3'  DT A  67     -54.234  29.068  13.780  3.00  0.00           C  
ATOM   2116  O3'  DT A  67     -55.368  29.428  13.040  3.00  0.00           O  
ATOM   2117  C2'  DT A  67     -54.554  27.959  14.760  4.00  0.00           C  
ATOM   2118  C1'  DT A  67     -54.443  26.744  13.840  1.00  0.00           C  
ATOM   2119  N1   DT A  67     -54.244  25.531  14.630  6.00  0.00           N  
ATOM   2120  C2   DT A  67     -55.121  24.385  14.320  3.00  0.00           C  
ATOM   2121  O2   DT A  67     -56.138  24.547  13.830  3.00  0.00           O  
ATOM   2122  N3   DT A  67     -54.741  23.131  14.750  1.00  0.00           N  
ATOM   2123  C4   DT A  67     -53.528  22.936  15.420  0.00  0.00           C  
ATOM   2124  O4   DT A  67     -53.223  21.781  15.720  5.00  0.00           O  
ATOM   2125  C5   DT A  67     -52.716  24.072  15.760  7.00  0.00           C  
ATOM   2126  C6   DT A  67     -53.109  25.295  15.380  1.00  0.00           C  
ATOM   2127  C7   DT A  67     -51.383  23.906  16.510  2.00  0.00           C  
ATOM   2128  OP1  DT A  67     -51.234  30.199  15.560  6.00  0.00           O  
ATOM   2129  OP2  DT A  67     -50.444  27.961  16.630  3.00  0.00           O1-
ATOM   2130  H3   DT A  67     -55.351  22.317  14.580  9.00  0.00           H  
ATOM   2131  H6   DT A  67     -52.380  26.112  15.520  5.00  0.00           H  
ATOM   2132  H1'  DT A  67     -55.323  26.705  13.230  4.00  0.00           H  
ATOM   2133  H2'  DT A  67     -53.827  28.049  15.570  8.00  0.00           H  
ATOM   2134  H3'  DT A  67     -53.748  29.919  14.120  2.00  0.00           H  
ATOM   2135  H4'  DT A  67     -53.465  28.631  11.860  8.00  0.00           H  
ATOM   2136  H5'  DT A  67     -51.214  28.141  12.180  6.00  0.00           H  
ATOM   2137  H71  DT A  67     -51.046  24.870  16.810  9.00  0.00           H  
ATOM   2138  H72  DT A  67     -50.609  23.569  15.850  3.00  0.00           H  
ATOM   2139  H73  DT A  67     -51.355  23.163  17.340  8.00  0.00           H  
ATOM   2140 H2''  DT A  67     -55.561  28.007  15.110  9.00  0.00           H  
ATOM   2141 H5''  DT A  67     -51.375  29.640  13.060  6.00  0.00           H  
ATOM   2142  P    DA A  68     -56.474  30.382  13.740  4.00  0.00           P  
ATOM   2143  C5'  DA A  68     -58.200  28.411  13.980  8.00  0.00           C  
ATOM   2144  O5'  DA A  68     -57.444  29.426  14.570  8.00  0.00           O  
ATOM   2145  C4'  DA A  68     -58.797  27.416  15.000  0.00  0.00           C  
ATOM   2146  O4'  DA A  68     -57.800  26.644  15.570  8.00  0.00           O  
ATOM   2147  C3'  DA A  68     -59.601  28.115  16.140  3.00  0.00           C  
ATOM   2148  O3'  DA A  68     -60.698  27.320  16.590  4.00  0.00           O  
ATOM   2149  C2'  DA A  68     -58.543  28.203  17.200  8.00  0.00           C  
ATOM   2150  C1'  DA A  68     -57.881  26.823  17.000  7.00  0.00           C  
ATOM   2151  N1   DA A  68     -54.669  23.577  19.170  2.00  0.00           N  
ATOM   2152  C2   DA A  68     -55.813  23.406  18.560  4.00  0.00           C  
ATOM   2153  N3   DA A  68     -56.532  24.319  18.010  8.00  0.00           N  
ATOM   2154  C4   DA A  68     -56.008  25.526  18.120  3.00  0.00           C  
ATOM   2155  C5   DA A  68     -54.820  25.869  18.640  4.00  0.00           C  
ATOM   2156  C6   DA A  68     -54.202  24.790  19.310  7.00  0.00           C  
ATOM   2157  N6   DA A  68     -53.009  24.823  19.910  6.00  0.00           N  
ATOM   2158  N7   DA A  68     -54.680  27.287  18.740  7.00  0.00           N  
ATOM   2159  C8   DA A  68     -55.809  27.665  18.250  4.00  0.00           C  
ATOM   2160  N9   DA A  68     -56.610  26.677  17.740  2.00  0.00           N  
ATOM   2161  OP1  DA A  68     -57.245  30.993  12.660  4.00  0.00           O  
ATOM   2162  OP2  DA A  68     -55.790  31.291  14.660  8.00  0.00           O1-
ATOM   2163  H2   DA A  68     -56.136  22.363  18.470  8.00  0.00           H  
ATOM   2164  H8   DA A  68     -56.021  28.770  18.170  3.00  0.00           H  
ATOM   2165  H1'  DA A  68     -58.540  26.032  17.300  0.00  0.00           H  
ATOM   2166  H2'  DA A  68     -57.877  29.044  17.040  4.00  0.00           H  
ATOM   2167  H3'  DA A  68     -59.927  29.118  15.920  6.00  0.00           H  
ATOM   2168  H4'  DA A  68     -59.582  26.802  14.520  3.00  0.00           H  
ATOM   2169  H5'  DA A  68     -57.591  27.922  13.260  1.00  0.00           H  
ATOM   2170  H61  DA A  68     -52.613  23.981  20.290  9.00  0.00           H  
ATOM   2171  H62  DA A  68     -52.500  25.676  19.940  0.00  0.00           H  
ATOM   2172 H2''  DA A  68     -58.900  28.314  18.240  2.00  0.00           H  
ATOM   2173 H5''  DA A  68     -59.002  28.871  13.450  1.00  0.00           H  
ATOM   2174  P    DA A  69     -62.242  27.764  16.280  8.00  0.00           P  
ATOM   2175  C5'  DA A  69     -62.462  26.948  13.720  9.00  0.00           C  
ATOM   2176  O5'  DA A  69     -62.369  27.952  14.670  6.00  0.00           O  
ATOM   2177  C4'  DA A  69     -62.651  27.494  12.270  8.00  0.00           C  
ATOM   2178  O4'  DA A  69     -63.559  28.602  12.340  1.00  0.00           O  
ATOM   2179  C3'  DA A  69     -61.315  28.058  11.820  3.00  0.00           C  
ATOM   2180  O3'  DA A  69     -60.984  27.845  10.480  4.00  0.00           O  
ATOM   2181  C2'  DA A  69     -61.346  29.612  12.050  9.00  0.00           C  
ATOM   2182  C1'  DA A  69     -62.871  29.782  11.810  7.00  0.00           C  
ATOM   2183  N1   DA A  69     -65.001  34.566  11.580  9.00  0.00           N  
ATOM   2184  C2   DA A  69     -64.513  33.797  10.630  4.00  0.00           C  
ATOM   2185  N3   DA A  69     -64.024  32.589  10.750  2.00  0.00           N  
ATOM   2186  C4   DA A  69     -63.882  32.195  12.050  8.00  0.00           C  
ATOM   2187  C5   DA A  69     -64.168  32.905  13.190  4.00  0.00           C  
ATOM   2188  C6   DA A  69     -64.817  34.133  12.910  5.00  0.00           C  
ATOM   2189  N6   DA A  69     -65.402  34.931  13.790  2.00  0.00           N  
ATOM   2190  N7   DA A  69     -64.040  32.150  14.370  9.00  0.00           N  
ATOM   2191  C8   DA A  69     -63.446  31.020  13.970  4.00  0.00           C  
ATOM   2192  N9   DA A  69     -63.328  30.987  12.560  1.00  0.00           N  
ATOM   2193  OP1  DA A  69     -62.518  29.046  16.920  8.00  0.00           O  
ATOM   2194  OP2  DA A  69     -63.151  26.628  16.570  3.00  0.00           O1-
ATOM   2195  H2   DA A  69     -64.652  34.217   9.610  1.00  0.00           H  
ATOM   2196  H8   DA A  69     -63.174  30.222  14.630  0.00  0.00           H  
ATOM   2197  H1'  DA A  69     -63.112  29.877  10.760  4.00  0.00           H  
ATOM   2198  H2'  DA A  69     -60.962  29.729  13.090  2.00  0.00           H  
ATOM   2199  H3'  DA A  69     -60.555  27.683  12.360  3.00  0.00           H  
ATOM   2200  H4'  DA A  69     -63.044  26.844  11.450  1.00  0.00           H  
ATOM   2201  H5'  DA A  69     -63.337  26.348  13.980  1.00  0.00           H  
ATOM   2202  H61  DA A  69     -66.062  35.682  13.430  3.00  0.00           H  
ATOM   2203  H62  DA A  69     -65.227  34.734  14.690  9.00  0.00           H  
ATOM   2204 H2''  DA A  69     -60.703  30.092  11.340  8.00  0.00           H  
ATOM   2205 H5''  DA A  69     -61.559  26.276  13.710  2.00  0.00           H  
ATOM   2206  P    DC A  70     -60.210  26.561   9.920  7.00  0.00           P  
ATOM   2207  C5'  DC A  70     -57.794  27.346   9.450  8.00  0.00           C  
ATOM   2208  O5'  DC A  70     -58.673  26.745  10.380  0.00  0.00           O  
ATOM   2209  C4'  DC A  70     -56.399  27.539  10.220  5.00  0.00           C  
ATOM   2210  O4'  DC A  70     -56.052  26.354  11.000  5.00  0.00           O  
ATOM   2211  C3'  DC A  70     -55.258  27.617   9.160  7.00  0.00           C  
ATOM   2212  O3'  DC A  70     -54.017  28.261   9.420  5.00  0.00           O  
ATOM   2213  C2'  DC A  70     -54.997  26.132   9.000  7.00  0.00           C  
ATOM   2214  C1'  DC A  70     -54.930  25.700  10.500  2.00  0.00           C  
ATOM   2215  N1   DC A  70     -54.844  24.241  10.710  7.00  0.00           N  
ATOM   2216  C2   DC A  70     -53.723  23.632  11.340  9.00  0.00           C  
ATOM   2217  O2   DC A  70     -52.758  24.301  11.750  3.00  0.00           O  
ATOM   2218  N3   DC A  70     -53.645  22.306  11.590  3.00  0.00           N  
ATOM   2219  C4   DC A  70     -54.567  21.510  11.090  6.00  0.00           C  
ATOM   2220  N4   DC A  70     -54.449  20.264  11.490  3.00  0.00           N  
ATOM   2221  C5   DC A  70     -55.618  22.007  10.290  5.00  0.00           C  
ATOM   2222  C6   DC A  70     -55.759  23.353  10.200  7.00  0.00           C  
ATOM   2223  OP1  DC A  70     -60.266  26.670   8.430  6.00  0.00           O  
ATOM   2224  OP2  DC A  70     -60.646  25.361  10.620  3.00  0.00           O1-
ATOM   2225  H5   DC A  70     -56.389  21.374   9.900  6.00  0.00           H  
ATOM   2226  H6   DC A  70     -56.577  23.758   9.640  5.00  0.00           H  
ATOM   2227  H1'  DC A  70     -53.962  26.127  10.910  0.00  0.00           H  
ATOM   2228  H2'  DC A  70     -55.917  25.723   8.510  5.00  0.00           H  
ATOM   2229  H3'  DC A  70     -55.707  27.950   8.220  1.00  0.00           H  
ATOM   2230  H4'  DC A  70     -56.374  28.297  10.950  6.00  0.00           H  
ATOM   2231  H41  DC A  70     -53.642  19.980  12.080  4.00  0.00           H  
ATOM   2232  H5'  DC A  70     -58.130  28.321   9.130  7.00  0.00           H  
ATOM   2233  H42  DC A  70     -55.069  19.546  11.110  9.00  0.00           H  
ATOM   2234 H2''  DC A  70     -54.019  25.959   8.480  1.00  0.00           H  
ATOM   2235 H5''  DC A  70     -57.688  26.830   8.460  7.00  0.00           H  
ATOM   2236  P    DC A  71     -53.573  29.403   8.420  6.00  0.00           P  
ATOM   2237  C5'  DC A  71     -51.077  29.637   9.120  6.00  0.00           C  
ATOM   2238  O5'  DC A  71     -52.388  30.169   9.300  2.00  0.00           O  
ATOM   2239  C4'  DC A  71     -50.231  30.671   9.880  4.00  0.00           C  
ATOM   2240  O4'  DC A  71     -48.788  30.542   9.730  2.00  0.00           O  
ATOM   2241  C3'  DC A  71     -50.380  32.133   9.380  7.00  0.00           C  
ATOM   2242  O3'  DC A  71     -49.835  33.026  10.370  3.00  0.00           O  
ATOM   2243  C2'  DC A  71     -49.491  32.147   8.250  6.00  0.00           C  
ATOM   2244  C1'  DC A  71     -48.243  31.372   8.750  6.00  0.00           C  
ATOM   2245  N1   DC A  71     -47.618  30.609   7.700  1.00  0.00           N  
ATOM   2246  C2   DC A  71     -47.111  31.281   6.630  5.00  0.00           C  
ATOM   2247  O2   DC A  71     -47.009  32.554   6.570  4.00  0.00           O  
ATOM   2248  N3   DC A  71     -46.642  30.591   5.560  4.00  0.00           N  
ATOM   2249  C4   DC A  71     -46.573  29.258   5.600  6.00  0.00           C  
ATOM   2250  N4   DC A  71     -46.243  28.638   4.480  5.00  0.00           N  
ATOM   2251  C5   DC A  71     -47.033  28.530   6.720  8.00  0.00           C  
ATOM   2252  C6   DC A  71     -47.509  29.235   7.770  6.00  0.00           C  
ATOM   2253  OP1  DC A  71     -54.733  30.244   8.240  0.00  0.00           O  
ATOM   2254  OP2  DC A  71     -52.932  28.754   7.250  4.00  0.00           O1-
ATOM   2255  H5   DC A  71     -46.933  27.410   6.860  5.00  0.00           H  
ATOM   2256  H6   DC A  71     -47.770  28.721   8.670  3.00  0.00           H  
ATOM   2257  H1'  DC A  71     -47.601  32.145   9.190  7.00  0.00           H  
ATOM   2258  H2'  DC A  71     -50.024  31.625   7.440  0.00  0.00           H  
ATOM   2259  H3'  DC A  71     -51.406  32.348   9.140  8.00  0.00           H  
ATOM   2260  H4'  DC A  71     -50.570  30.465  10.900  9.00  0.00           H  
ATOM   2261  H41  DC A  71     -46.046  29.298   3.730  8.00  0.00           H  
ATOM   2262  H5'  DC A  71     -50.866  29.374   8.060  5.00  0.00           H  
ATOM   2263  H42  DC A  71     -46.161  27.635   4.390  8.00  0.00           H  
ATOM   2264 H2''  DC A  71     -49.266  33.050   7.830  9.00  0.00           H  
ATOM   2265 H5''  DC A  71     -51.177  28.617   9.610  7.00  0.00           H  
ATOM   2266  P    DC A  72     -50.699  33.482  11.580  1.00  0.00           P  
ATOM   2267  C5'  DC A  72     -51.495  35.643  10.410  2.00  0.00           C  
ATOM   2268  O5'  DC A  72     -51.795  34.421  11.080  9.00  0.00           O  
ATOM   2269  C4'  DC A  72     -52.762  36.477   9.900  6.00  0.00           C  
ATOM   2270  O4'  DC A  72     -52.364  37.547   9.030  3.00  0.00           O  
ATOM   2271  C3'  DC A  72     -53.858  35.660   9.190  3.00  0.00           C  
ATOM   2272  O3'  DC A  72     -55.228  36.012   9.640  4.00  0.00           O  
ATOM   2273  C2'  DC A  72     -53.643  36.077   7.760  0.00  0.00           C  
ATOM   2274  C1'  DC A  72     -53.328  37.513   8.010  5.00  0.00           C  
ATOM   2275  N1   DC A  72     -53.048  38.062   6.700  2.00  0.00           N  
ATOM   2276  C2   DC A  72     -53.948  38.783   5.900  8.00  0.00           C  
ATOM   2277  O2   DC A  72     -55.061  39.042   6.310  5.00  0.00           O  
ATOM   2278  N3   DC A  72     -53.678  39.249   4.690  2.00  0.00           N  
ATOM   2279  C4   DC A  72     -52.414  39.085   4.280  7.00  0.00           C  
ATOM   2280  N4   DC A  72     -52.197  39.663   3.170  3.00  0.00           N  
ATOM   2281  C5   DC A  72     -51.405  38.465   5.070  0.00  0.00           C  
ATOM   2282  C6   DC A  72     -51.760  37.958   6.260  6.00  0.00           C  
ATOM   2283  OP1  DC A  72     -49.721  34.272  12.340  9.00  0.00           O  
ATOM   2284  OP2  DC A  72     -51.321  32.319  12.200  8.00  0.00           O1-
ATOM   2285  H5   DC A  72     -50.415  38.408   4.760  2.00  0.00           H  
ATOM   2286  H6   DC A  72     -51.065  37.403   6.870  9.00  0.00           H  
ATOM   2287  H1'  DC A  72     -54.263  37.923   8.400  5.00  0.00           H  
ATOM   2288  H2'  DC A  72     -52.774  35.607   7.290  0.00  0.00           H  
ATOM   2289  H3'  DC A  72     -53.671  34.583   9.290  4.00  0.00           H  
ATOM   2290  H4'  DC A  72     -53.205  36.883  10.790  9.00  0.00           H  
ATOM   2291  H41  DC A  72     -53.076  39.893   2.660  0.00  0.00           H  
ATOM   2292  H5'  DC A  72     -50.897  35.482   9.540  4.00  0.00           H  
ATOM   2293  H42  DC A  72     -51.297  39.710   2.670  6.00  0.00           H  
ATOM   2294 H2''  DC A  72     -54.590  35.992   7.170  2.00  0.00           H  
ATOM   2295 H5''  DC A  72     -50.862  36.222  11.040  1.00  0.00           H  
ATOM   2296  P    DT A  73     -56.253  34.909   9.650  2.00  0.00           P  
ATOM   2297  C5'  DT A  73     -58.148  36.055  11.070  7.00  0.00           C  
ATOM   2298  O5'  DT A  73     -57.641  35.634   9.770  4.00  0.00           O  
ATOM   2299  C4'  DT A  73     -59.508  36.776  10.860  3.00  0.00           C  
ATOM   2300  O4'  DT A  73     -60.108  36.936  12.170  4.00  0.00           O  
ATOM   2301  C3'  DT A  73     -59.464  38.283  10.250  6.00  0.00           C  
ATOM   2302  O3'  DT A  73     -60.571  38.413   9.350  9.00  0.00           O  
ATOM   2303  C2'  DT A  73     -59.460  39.144  11.530  4.00  0.00           C  
ATOM   2304  C1'  DT A  73     -60.486  38.343  12.350  2.00  0.00           C  
ATOM   2305  N1   DT A  73     -60.532  38.943  13.690  4.00  0.00           N  
ATOM   2306  C2   DT A  73     -61.284  40.120  13.910  9.00  0.00           C  
ATOM   2307  O2   DT A  73     -61.957  40.710  13.080  6.00  0.00           O  
ATOM   2308  N3   DT A  73     -61.128  40.718  15.180  5.00  0.00           N  
ATOM   2309  C4   DT A  73     -60.386  40.188  16.210  8.00  0.00           C  
ATOM   2310  O4   DT A  73     -60.367  40.733  17.270  7.00  0.00           O  
ATOM   2311  C5   DT A  73     -59.571  39.020  15.890  4.00  0.00           C  
ATOM   2312  C6   DT A  73     -59.715  38.445  14.710  9.00  0.00           C  
ATOM   2313  C7   DT A  73     -58.557  38.469  16.860  5.00  0.00           C  
ATOM   2314  OP1  DT A  73     -56.062  34.018  10.850  7.00  0.00           O  
ATOM   2315  OP2  DT A  73     -56.275  34.271   8.370  0.00  0.00           O1-
ATOM   2316  H3   DT A  73     -61.332  41.737  15.280  4.00  0.00           H  
ATOM   2317  H6   DT A  73     -59.039  37.623  14.520  8.00  0.00           H  
ATOM   2318  H1'  DT A  73     -61.468  38.463  11.850  7.00  0.00           H  
ATOM   2319  H2'  DT A  73     -58.556  39.168  11.980  3.00  0.00           H  
ATOM   2320  H3'  DT A  73     -58.479  38.467   9.760  6.00  0.00           H  
ATOM   2321  H4'  DT A  73     -60.173  36.139  10.280  5.00  0.00           H  
ATOM   2322  H5'  DT A  73     -57.381  36.698  11.470  9.00  0.00           H  
ATOM   2323  H71  DT A  73     -58.392  37.471  16.490  2.00  0.00           H  
ATOM   2324  H72  DT A  73     -57.678  39.128  16.860  7.00  0.00           H  
ATOM   2325  H73  DT A  73     -58.934  38.316  17.900  9.00  0.00           H  
ATOM   2326 H2''  DT A  73     -59.640  40.221  11.290  3.00  0.00           H  
ATOM   2327 H5''  DT A  73     -58.404  35.191  11.670  1.00  0.00           H  
ATOM   2328  P    DA A  74     -60.509  39.686   8.340  3.00  0.00           P  
ATOM   2329  C5'  DA A  74     -62.894  40.704   9.070  7.00  0.00           C  
ATOM   2330  O5'  DA A  74     -61.489  40.842   9.020  4.00  0.00           O  
ATOM   2331  C4'  DA A  74     -63.536  42.130   8.950  6.00  0.00           C  
ATOM   2332  O4'  DA A  74     -63.295  42.993  10.140  9.00  0.00           O  
ATOM   2333  C3'  DA A  74     -62.969  42.916   7.830  2.00  0.00           C  
ATOM   2334  O3'  DA A  74     -63.952  43.734   7.240  2.00  0.00           O  
ATOM   2335  C2'  DA A  74     -61.889  43.824   8.470  8.00  0.00           C  
ATOM   2336  C1'  DA A  74     -62.537  44.121   9.810  4.00  0.00           C  
ATOM   2337  N1   DA A  74     -61.070  46.581  14.010  9.00  0.00           N  
ATOM   2338  C2   DA A  74     -61.836  46.894  13.030  4.00  0.00           C  
ATOM   2339  N3   DA A  74     -62.146  46.258  11.900  6.00  0.00           N  
ATOM   2340  C4   DA A  74     -61.464  45.092  11.890  4.00  0.00           C  
ATOM   2341  C5   DA A  74     -60.689  44.542  12.860  7.00  0.00           C  
ATOM   2342  C6   DA A  74     -60.525  45.341  14.000  5.00  0.00           C  
ATOM   2343  N6   DA A  74     -59.737  45.053  14.960  6.00  0.00           N  
ATOM   2344  N7   DA A  74     -60.131  43.319  12.510  4.00  0.00           N  
ATOM   2345  C8   DA A  74     -60.672  43.125  11.300  0.00  0.00           C  
ATOM   2346  N9   DA A  74     -61.499  44.178  10.890  1.00  0.00           N  
ATOM   2347  OP1  DA A  74     -61.147  39.220   7.130  6.00  0.00           O  
ATOM   2348  OP2  DA A  74     -59.186  40.292   8.230  7.00  0.00           O1-
ATOM   2349  H2   DA A  74     -62.375  47.817  13.190  7.00  0.00           H  
ATOM   2350  H8   DA A  74     -60.523  42.189  10.700  3.00  0.00           H  
ATOM   2351  H1'  DA A  74     -63.197  44.990   9.800  8.00  0.00           H  
ATOM   2352  H2'  DA A  74     -60.951  43.252   8.690  6.00  0.00           H  
ATOM   2353  H3'  DA A  74     -62.565  42.174   7.160  8.00  0.00           H  
ATOM   2354  H4'  DA A  74     -64.646  42.028   8.860  1.00  0.00           H  
ATOM   2355  H5'  DA A  74     -63.161  40.114   9.910  9.00  0.00           H  
ATOM   2356  H61  DA A  74     -59.669  45.761  15.690  8.00  0.00           H  
ATOM   2357  H62  DA A  74     -59.259  44.204  14.940  2.00  0.00           H  
ATOM   2358 H2''  DA A  74     -61.678  44.787   8.080  9.00  0.00           H  
ATOM   2359 H5''  DA A  74     -63.202  40.153   8.190  3.00  0.00           H  
ATOM   2360  P    DA A  75     -63.861  44.014   5.680  2.00  0.00           P  
ATOM   2361  C5'  DA A  75     -62.729  46.417   5.850  9.00  0.00           C  
ATOM   2362  O5'  DA A  75     -62.621  45.053   5.670  2.00  0.00           O  
ATOM   2363  C4'  DA A  75     -61.284  46.950   5.830  9.00  0.00           C  
ATOM   2364  O4'  DA A  75     -60.755  46.897   7.130  9.00  0.00           O  
ATOM   2365  C3'  DA A  75     -60.273  46.264   4.910  1.00  0.00           C  
ATOM   2366  O3'  DA A  75     -59.523  47.272   4.330  9.00  0.00           O  
ATOM   2367  C2'  DA A  75     -59.323  45.659   5.840  6.00  0.00           C  
ATOM   2368  C1'  DA A  75     -59.411  46.572   7.160  8.00  0.00           C  
ATOM   2369  N1   DA A  75     -57.509  47.375  11.990  6.00  0.00           N  
ATOM   2370  C2   DA A  75     -58.013  48.183  11.070  9.00  0.00           C  
ATOM   2371  N3   DA A  75     -58.472  47.925   9.900  3.00  0.00           N  
ATOM   2372  C4   DA A  75     -58.463  46.628   9.540  5.00  0.00           C  
ATOM   2373  C5   DA A  75     -57.937  45.622  10.340  9.00  0.00           C  
ATOM   2374  C6   DA A  75     -57.535  46.067  11.610  3.00  0.00           C  
ATOM   2375  N6   DA A  75     -57.025  45.262  12.510  1.00  0.00           N  
ATOM   2376  N7   DA A  75     -57.978  44.375   9.730  0.00  0.00           N  
ATOM   2377  C8   DA A  75     -58.584  44.643   8.600  6.00  0.00           C  
ATOM   2378  N9   DA A  75     -58.824  45.993   8.360  0.00  0.00           N  
ATOM   2379  OP1  DA A  75     -65.010  44.783   5.190  8.00  0.00           O  
ATOM   2380  OP2  DA A  75     -63.447  42.747   4.960  8.00  0.00           O1-
ATOM   2381  H2   DA A  75     -58.018  49.302  11.280  8.00  0.00           H  
ATOM   2382  H8   DA A  75     -58.864  43.914   7.890  3.00  0.00           H  
ATOM   2383  H1'  DA A  75     -58.784  47.500   6.990  3.00  0.00           H  
ATOM   2384  H2'  DA A  75     -59.628  44.647   6.140  9.00  0.00           H  
ATOM   2385  H3'  DA A  75     -60.701  45.477   4.240  1.00  0.00           H  
ATOM   2386  H4'  DA A  75     -61.332  48.071   5.520  7.00  0.00           H  
ATOM   2387  H5'  DA A  75     -63.147  46.649   6.790  7.00  0.00           H  
ATOM   2388  H61  DA A  75     -56.767  45.609  13.390  6.00  0.00           H  
ATOM   2389  H62  DA A  75     -57.075  44.237  12.260  6.00  0.00           H  
ATOM   2390 H2''  DA A  75     -58.316  45.562   5.380  2.00  0.00           H  
ATOM   2391 H5''  DA A  75     -63.314  46.867   5.080  5.00  0.00           H  
ATOM   2392  P    DC A  76     -59.472  47.333   2.720  1.00  0.00           P  
ATOM   2393  C5'  DC A  76     -56.895  46.873   2.950  7.00  0.00           C  
ATOM   2394  O5'  DC A  76     -58.176  46.417   2.410  6.00  0.00           O  
ATOM   2395  C4'  DC A  76     -55.941  45.644   3.100  7.00  0.00           C  
ATOM   2396  O4'  DC A  76     -56.586  44.563   3.770  1.00  0.00           O  
ATOM   2397  C3'  DC A  76     -55.600  44.986   1.720  0.00  0.00           C  
ATOM   2398  O3'  DC A  76     -54.318  44.465   1.780  8.00  0.00           O  
ATOM   2399  C2'  DC A  76     -56.691  43.892   1.630  6.00  0.00           C  
ATOM   2400  C1'  DC A  76     -56.723  43.361   3.010  5.00  0.00           C  
ATOM   2401  N1   DC A  76     -57.962  42.673   3.400  5.00  0.00           N  
ATOM   2402  C2   DC A  76     -57.854  41.550   4.240  8.00  0.00           C  
ATOM   2403  O2   DC A  76     -56.837  40.860   4.430  8.00  0.00           O  
ATOM   2404  N3   DC A  76     -58.916  41.075   4.870  0.00  0.00           N  
ATOM   2405  C4   DC A  76     -60.030  41.790   4.850  8.00  0.00           C  
ATOM   2406  N4   DC A  76     -61.033  41.160   5.310  4.00  0.00           N  
ATOM   2407  C5   DC A  76     -60.234  42.860   3.960  3.00  0.00           C  
ATOM   2408  C6   DC A  76     -59.166  43.278   3.210  2.00  0.00           C  
ATOM   2409  OP1  DC A  76     -59.259  48.721   2.300  6.00  0.00           O  
ATOM   2410  OP2  DC A  76     -60.629  46.621   2.110  1.00  0.00           O1-
ATOM   2411  H5   DC A  76     -61.278  43.172   3.840  7.00  0.00           H  
ATOM   2412  H6   DC A  76     -59.419  44.027   2.430  9.00  0.00           H  
ATOM   2413  H1'  DC A  76     -55.842  42.691   3.100  1.00  0.00           H  
ATOM   2414  H2'  DC A  76     -57.639  44.336   1.270  5.00  0.00           H  
ATOM   2415  H3'  DC A  76     -55.732  45.685   0.840  6.00  0.00           H  
ATOM   2416  H4'  DC A  76     -55.118  46.017   3.660  8.00  0.00           H  
ATOM   2417  H41  DC A  76     -60.875  40.354   5.910  0.00  0.00           H  
ATOM   2418  H5'  DC A  76     -56.927  47.225   4.020  7.00  0.00           H  
ATOM   2419  H42  DC A  76     -61.966  41.519   5.200  9.00  0.00           H  
ATOM   2420 H2''  DC A  76     -56.549  43.132   0.870  5.00  0.00           H  
ATOM   2421 H5''  DC A  76     -56.492  47.738   2.400  4.00  0.00           H  
ATOM   2422  P    DC A  77     -53.457  43.933   0.650  5.00  0.00           P  
ATOM   2423  C5'  DC A  77     -50.803  44.150   1.180  0.00  0.00           C  
ATOM   2424  O5'  DC A  77     -52.088  43.658   1.540  6.00  0.00           O  
ATOM   2425  C4'  DC A  77     -49.799  43.654   2.280  7.00  0.00           C  
ATOM   2426  O4'  DC A  77     -50.200  44.167   3.590  7.00  0.00           O  
ATOM   2427  C3'  DC A  77     -49.777  42.115   2.470  2.00  0.00           C  
ATOM   2428  O3'  DC A  77     -48.863  41.480   1.590  7.00  0.00           O  
ATOM   2429  C2'  DC A  77     -49.076  42.069   3.830  8.00  0.00           C  
ATOM   2430  C1'  DC A  77     -49.767  43.206   4.600  6.00  0.00           C  
ATOM   2431  N1   DC A  77     -50.904  42.738   5.540  7.00  0.00           N  
ATOM   2432  C2   DC A  77     -50.663  42.734   6.920  3.00  0.00           C  
ATOM   2433  O2   DC A  77     -49.615  43.185   7.420  4.00  0.00           O  
ATOM   2434  N3   DC A  77     -51.676  42.346   7.700  6.00  0.00           N  
ATOM   2435  C4   DC A  77     -52.801  41.922   7.230  5.00  0.00           C  
ATOM   2436  N4   DC A  77     -53.656  41.526   8.170  6.00  0.00           N  
ATOM   2437  C5   DC A  77     -53.062  41.889   5.840  7.00  0.00           C  
ATOM   2438  C6   DC A  77     -52.083  42.310   4.950  0.00  0.00           C  
ATOM   2439  OP1  DC A  77     -53.124  44.998  -0.280  3.00  0.00           O  
ATOM   2440  OP2  DC A  77     -54.083  42.666   0.140  7.00  0.00           O1-
ATOM   2441  H5   DC A  77     -54.038  41.584   5.430  8.00  0.00           H  
ATOM   2442  H6   DC A  77     -52.287  42.500   3.880  1.00  0.00           H  
ATOM   2443  H1'  DC A  77     -49.106  43.613   5.330  8.00  0.00           H  
ATOM   2444  H2'  DC A  77     -49.234  41.097   4.310  3.00  0.00           H  
ATOM   2445  H3'  DC A  77     -50.735  41.723   2.470  9.00  0.00           H  
ATOM   2446  H4'  DC A  77     -48.799  43.999   2.030  2.00  0.00           H  
ATOM   2447  H41  DC A  77     -53.285  41.501   9.100  3.00  0.00           H  
ATOM   2448  H5'  DC A  77     -50.690  45.196   1.040  0.00  0.00           H  
ATOM   2449  H42  DC A  77     -54.522  41.146   7.980  2.00  0.00           H  
ATOM   2450 H2''  DC A  77     -48.011  42.296   3.750  8.00  0.00           H  
ATOM   2451 H5''  DC A  77     -50.551  43.603   0.270  7.00  0.00           H  
ATOM   2452  P    DC A  78     -49.242  40.342   0.600  1.00  0.00           P  
ATOM   2453  C5'  DC A  78     -46.731  39.792   0.330  9.00  0.00           C  
ATOM   2454  O5'  DC A  78     -47.917  40.079  -0.300  1.00  0.00           O  
ATOM   2455  C4'  DC A  78     -45.749  39.023  -0.600  5.00  0.00           C  
ATOM   2456  O4'  DC A  78     -44.597  38.641   0.170  3.00  0.00           O  
ATOM   2457  C3'  DC A  78     -46.474  37.702  -1.130  0.00  0.00           C  
ATOM   2458  O3'  DC A  78     -46.287  37.444  -2.470  8.00  0.00           O  
ATOM   2459  C2'  DC A  78     -45.782  36.650  -0.230  2.00  0.00           C  
ATOM   2460  C1'  DC A  78     -44.407  37.272   0.000  4.00  0.00           C  
ATOM   2461  N1   DC A  78     -43.790  36.698   1.260  6.00  0.00           N  
ATOM   2462  C2   DC A  78     -42.837  35.699   1.110  7.00  0.00           C  
ATOM   2463  O2   DC A  78     -42.379  35.443  -0.020  1.00  0.00           O  
ATOM   2464  N3   DC A  78     -42.317  34.972   2.150  0.00  0.00           N  
ATOM   2465  C4   DC A  78     -42.745  35.276   3.370  0.00  0.00           C  
ATOM   2466  N4   DC A  78     -41.996  34.747   4.300  3.00  0.00           N  
ATOM   2467  C5   DC A  78     -43.723  36.293   3.590  1.00  0.00           C  
ATOM   2468  C6   DC A  78     -44.194  37.003   2.510  9.00  0.00           C  
ATOM   2469  OP1  DC A  78     -50.249  40.855  -0.330  1.00  0.00           O  
ATOM   2470  OP2  DC A  78     -49.581  39.110   1.350  4.00  0.00           O1-
ATOM   2471  H5   DC A  78     -44.046  36.517   4.600  0.00  0.00           H  
ATOM   2472  H6   DC A  78     -44.966  37.778   2.680  3.00  0.00           H  
ATOM   2473  H1'  DC A  78     -43.700  37.111  -0.840  4.00  0.00           H  
ATOM   2474  H2'  DC A  78     -46.278  36.410   0.670  2.00  0.00           H  
ATOM   2475  H3'  DC A  78     -47.549  37.716  -0.880  0.00  0.00           H  
ATOM   2476  H4'  DC A  78     -45.489  39.656  -1.460  9.00  0.00           H  
ATOM   2477  H41  DC A  78     -41.286  34.049   4.020  2.00  0.00           H  
ATOM   2478  H5'  DC A  78     -46.882  39.049   1.130  1.00  0.00           H  
ATOM   2479  H42  DC A  78     -42.283  35.000   5.250  0.00  0.00           H  
ATOM   2480 H2''  DC A  78     -45.658  35.632  -0.820  0.00  0.00           H  
ATOM   2481 H5''  DC A  78     -46.361  40.601   0.910  3.00  0.00           H  
ATOM   2482  P    DT A  79     -47.160  38.153  -3.650  6.00  0.00           P  
ATOM   2483  C5'  DT A  79     -46.513  38.548  -6.260  5.00  0.00           C  
ATOM   2484  O5'  DT A  79     -46.058  38.147  -4.880  3.00  0.00           O  
ATOM   2485  C4'  DT A  79     -45.468  38.216  -7.310  2.00  0.00           C  
ATOM   2486  O4'  DT A  79     -45.969  38.643  -8.630  2.00  0.00           O  
ATOM   2487  C3'  DT A  79     -44.102  38.915  -7.060  5.00  0.00           C  
ATOM   2488  O3'  DT A  79     -43.014  38.217  -7.680  9.00  0.00           O  
ATOM   2489  C2'  DT A  79     -44.325  40.202  -7.880  1.00  0.00           C  
ATOM   2490  C1'  DT A  79     -45.157  39.713  -9.060  4.00  0.00           C  
ATOM   2491  N1   DT A  79     -45.929  40.818  -9.690  3.00  0.00           N  
ATOM   2492  C2   DT A  79     -45.629  41.124 -11.040  7.00  0.00           C  
ATOM   2493  O2   DT A  79     -44.833  40.460 -11.740  3.00  0.00           O  
ATOM   2494  N3   DT A  79     -46.210  42.194 -11.580  7.00  0.00           N  
ATOM   2495  C4   DT A  79     -47.155  42.930 -10.980  1.00  0.00           C  
ATOM   2496  O4   DT A  79     -47.686  43.760 -11.760  5.00  0.00           O  
ATOM   2497  C5   DT A  79     -47.490  42.591  -9.560  2.00  0.00           C  
ATOM   2498  C6   DT A  79     -46.827  41.625  -8.950  2.00  0.00           C  
ATOM   2499  C7   DT A  79     -48.560  43.329  -8.780  6.00  0.00           C  
ATOM   2500  OP1  DT A  79     -48.371  37.304  -4.000  2.00  0.00           O  
ATOM   2501  OP2  DT A  79     -47.389  39.517  -3.220  1.00  0.00           O1-
ATOM   2502  H3   DT A  79     -45.912  42.454 -12.500  0.00  0.00           H  
ATOM   2503  H6   DT A  79     -47.145  41.284  -7.990  6.00  0.00           H  
ATOM   2504  H1'  DT A  79     -44.481  39.247  -9.820  4.00  0.00           H  
ATOM   2505  H2'  DT A  79     -44.925  40.940  -7.340  2.00  0.00           H  
ATOM   2506  H3'  DT A  79     -43.945  39.099  -6.000  8.00  0.00           H  
ATOM   2507  H4'  DT A  79     -45.260  37.157  -7.200  2.00  0.00           H  
ATOM   2508  H5'  DT A  79     -46.873  39.576  -6.310  0.00  0.00           H  
ATOM   2509  H71  DT A  79     -48.312  44.353  -8.910  4.00  0.00           H  
ATOM   2510  H72  DT A  79     -49.579  43.248  -9.150  8.00  0.00           H  
ATOM   2511  H73  DT A  79     -48.598  43.069  -7.750  4.00  0.00           H  
ATOM   2512 H2''  DT A  79     -43.431  40.648  -8.200  4.00  0.00           H  
ATOM   2513 H5''  DT A  79     -47.216  37.793  -6.420  8.00  0.00           H  
ATOM   2514  P    DA A  80     -42.116  37.149  -6.870  7.00  0.00           P  
ATOM   2515  C5'  DA A  80     -39.899  38.254  -6.190  8.00  0.00           C  
ATOM   2516  O5'  DA A  80     -41.249  38.034  -5.940  4.00  0.00           O  
ATOM   2517  C4'  DA A  80     -39.570  39.092  -7.510  9.00  0.00           C  
ATOM   2518  O4'  DA A  80     -40.496  40.124  -7.690  7.00  0.00           O  
ATOM   2519  C3'  DA A  80     -38.213  39.670  -7.680  2.00  0.00           C  
ATOM   2520  O3'  DA A  80     -37.946  39.783  -9.080  3.00  0.00           O  
ATOM   2521  C2'  DA A  80     -38.453  40.963  -7.030  2.00  0.00           C  
ATOM   2522  C1'  DA A  80     -39.828  41.328  -7.440  6.00  0.00           C  
ATOM   2523  N1   DA A  80     -42.306  45.714  -7.020  6.00  0.00           N  
ATOM   2524  C2   DA A  80     -41.434  45.288  -7.990  2.00  0.00           C  
ATOM   2525  N3   DA A  80     -40.905  44.100  -8.070  3.00  0.00           N  
ATOM   2526  C4   DA A  80     -41.183  43.387  -6.940  7.00  0.00           C  
ATOM   2527  C5   DA A  80     -41.902  43.720  -5.850  6.00  0.00           C  
ATOM   2528  C6   DA A  80     -42.505  45.011  -5.920  6.00  0.00           C  
ATOM   2529  N6   DA A  80     -43.314  45.659  -5.120  2.00  0.00           N  
ATOM   2530  N7   DA A  80     -41.888  42.772  -4.880  6.00  0.00           N  
ATOM   2531  C8   DA A  80     -41.216  41.760  -5.420  4.00  0.00           C  
ATOM   2532  N9   DA A  80     -40.728  42.105  -6.620  8.00  0.00           N  
ATOM   2533  OP1  DA A  80     -41.181  36.501  -7.800  4.00  0.00           O  
ATOM   2534  OP2  DA A  80     -43.002  36.329  -6.090  0.00  0.00           O1-
ATOM   2535  H2   DA A  80     -41.377  45.925  -8.840  8.00  0.00           H  
ATOM   2536  H8   DA A  80     -40.961  40.822  -4.880  3.00  0.00           H  
ATOM   2537  H1'  DA A  80     -39.690  41.910  -8.410  8.00  0.00           H  
ATOM   2538  H2'  DA A  80     -38.536  41.020  -5.960  6.00  0.00           H  
ATOM   2539  H3'  DA A  80     -37.292  39.207  -7.090  1.00  0.00           H  
ATOM   2540  H4'  DA A  80     -39.697  38.352  -8.300  8.00  0.00           H  
ATOM   2541  H5'  DA A  80     -39.333  37.342  -6.030  2.00  0.00           H  
ATOM   2542  H61  DA A  80     -43.810  46.419  -5.490  5.00  0.00           H  
ATOM   2543  H62  DA A  80     -43.476  45.329  -4.190  4.00  0.00           H  
ATOM   2544 H2''  DA A  80     -37.797  41.738  -7.320  6.00  0.00           H  
ATOM   2545 H5''  DA A  80     -39.630  38.872  -5.330  6.00  0.00           H  
ATOM   2546  P    DA A  81     -36.434  40.237  -9.540  1.00  0.00           P  
ATOM   2547  C5'  DA A  81     -37.021  42.684 -10.060  7.00  0.00           C  
ATOM   2548  O5'  DA A  81     -36.265  41.806  -9.220  0.00  0.00           O  
ATOM   2549  C4'  DA A  81     -37.100  44.149  -9.600  6.00  0.00           C  
ATOM   2550  O4'  DA A  81     -37.894  44.241  -8.400  7.00  0.00           O  
ATOM   2551  C3'  DA A  81     -35.743  44.744  -9.360  4.00  0.00           C  
ATOM   2552  O3'  DA A  81     -35.404  45.506 -10.480  1.00  0.00           O  
ATOM   2553  C2'  DA A  81     -36.158  45.674  -8.100  3.00  0.00           C  
ATOM   2554  C1'  DA A  81     -37.714  45.538  -8.000  7.00  0.00           C  
ATOM   2555  N1   DA A  81     -40.692  48.685  -5.410  8.00  0.00           N  
ATOM   2556  C2   DA A  81     -40.185  48.746  -6.630  0.00  0.00           C  
ATOM   2557  N3   DA A  81     -39.313  47.910  -7.170  7.00  0.00           N  
ATOM   2558  C4   DA A  81     -38.968  46.910  -6.310  4.00  0.00           C  
ATOM   2559  C5   DA A  81     -39.329  46.756  -5.010  4.00  0.00           C  
ATOM   2560  C6   DA A  81     -40.241  47.768  -4.540  0.00  0.00           C  
ATOM   2561  N6   DA A  81     -40.814  47.789  -3.380  0.00  0.00           N  
ATOM   2562  N7   DA A  81     -38.757  45.585  -4.490  0.00  0.00           N  
ATOM   2563  C8   DA A  81     -38.112  45.126  -5.460  0.00  0.00           C  
ATOM   2564  N9   DA A  81     -38.213  45.836  -6.640  1.00  0.00           N  
ATOM   2565  OP1  DA A  81     -36.349  40.219 -11.040  0.00  0.00           O  
ATOM   2566  OP2  DA A  81     -35.359  39.617  -8.690  0.00  0.00           O1-
ATOM   2567  H2   DA A  81     -40.580  49.498  -7.310  1.00  0.00           H  
ATOM   2568  H8   DA A  81     -37.670  44.120  -5.480  7.00  0.00           H  
ATOM   2569  H1'  DA A  81     -38.136  46.299  -8.700  9.00  0.00           H  
ATOM   2570  H2'  DA A  81     -35.620  45.332  -7.190  4.00  0.00           H  
ATOM   2571  H3'  DA A  81     -34.921  44.075  -8.990  0.00  0.00           H  
ATOM   2572  H4'  DA A  81     -37.558  44.739 -10.450  6.00  0.00           H  
ATOM   2573  H5'  DA A  81     -38.011  42.384 -10.250  1.00  0.00           H  
ATOM   2574  H61  DA A  81     -41.562  48.399  -3.180  7.00  0.00           H  
ATOM   2575  H62  DA A  81     -40.568  47.058  -2.780  4.00  0.00           H  
ATOM   2576 H2''  DA A  81     -35.969  46.737  -8.230  5.00  0.00           H  
ATOM   2577 H5''  DA A  81     -36.627  42.792 -11.080  5.00  0.00           H  
ATOM   2578  P    DC A  82     -34.137  46.412 -10.590  3.00  0.00           P  
ATOM   2579  C5'  DC A  82     -35.562  48.702 -10.830  5.00  0.00           C  
ATOM   2580  O5'  DC A  82     -34.694  47.821 -10.020  9.00  0.00           O  
ATOM   2581  C4'  DC A  82     -35.963  49.987 -10.050  3.00  0.00           C  
ATOM   2582  O4'  DC A  82     -36.630  49.797  -8.840  4.00  0.00           O  
ATOM   2583  C3'  DC A  82     -34.732  50.777  -9.670  3.00  0.00           C  
ATOM   2584  O3'  DC A  82     -34.929  52.148  -9.710  3.00  0.00           O  
ATOM   2585  C2'  DC A  82     -34.502  50.457  -8.210  9.00  0.00           C  
ATOM   2586  C1'  DC A  82     -35.966  50.439  -7.760  7.00  0.00           C  
ATOM   2587  N1   DC A  82     -36.157  49.830  -6.380  7.00  0.00           N  
ATOM   2588  C2   DC A  82     -37.130  50.407  -5.550  1.00  0.00           C  
ATOM   2589  O2   DC A  82     -37.664  51.460  -5.870  6.00  0.00           O  
ATOM   2590  N3   DC A  82     -37.412  49.964  -4.280  5.00  0.00           N  
ATOM   2591  C4   DC A  82     -36.761  48.849  -3.890  5.00  0.00           C  
ATOM   2592  N4   DC A  82     -37.050  48.243  -2.800  0.00  0.00           N  
ATOM   2593  C5   DC A  82     -35.750  48.220  -4.690  6.00  0.00           C  
ATOM   2594  C6   DC A  82     -35.470  48.729  -5.940  8.00  0.00           C  
ATOM   2595  OP1  DC A  82     -33.808  46.561 -12.020  0.00  0.00           O  
ATOM   2596  OP2  DC A  82     -33.067  45.798  -9.700  6.00  0.00           O1-
ATOM   2597  H5   DC A  82     -35.229  47.432  -4.300  4.00  0.00           H  
ATOM   2598  H6   DC A  82     -34.697  48.233  -6.490  6.00  0.00           H  
ATOM   2599  H1'  DC A  82     -36.391  51.420  -7.720  3.00  0.00           H  
ATOM   2600  H2'  DC A  82     -34.075  49.543  -8.080  4.00  0.00           H  
ATOM   2601  H3'  DC A  82     -33.878  50.465 -10.210  8.00  0.00           H  
ATOM   2602  H4'  DC A  82     -36.557  50.605 -10.670  8.00  0.00           H  
ATOM   2603  H41  DC A  82     -37.805  48.587  -2.270  9.00  0.00           H  
ATOM   2604  H5'  DC A  82     -36.511  48.208 -11.170  3.00  0.00           H  
ATOM   2605  H42  DC A  82     -36.484  47.384  -2.580  8.00  0.00           H  
ATOM   2606 H2''  DC A  82     -33.898  51.242  -7.710  6.00  0.00           H  
ATOM   2607 H5''  DC A  82     -35.125  48.975 -11.720  4.00  0.00           H  
ATOM   2608  P    DC A  83     -33.860  53.114 -10.330  4.00  0.00           P  
ATOM   2609  C5'  DC A  83     -35.995  54.356 -11.080  4.00  0.00           C  
ATOM   2610  O5'  DC A  83     -34.756  54.440 -10.460  6.00  0.00           O  
ATOM   2611  C4'  DC A  83     -37.106  54.864 -10.180  2.00  0.00           C  
ATOM   2612  O4'  DC A  83     -37.085  54.227  -8.840  7.00  0.00           O  
ATOM   2613  C3'  DC A  83     -37.069  56.434  -9.860  2.00  0.00           C  
ATOM   2614  O3'  DC A  83     -38.329  57.040 -10.110  9.00  0.00           O  
ATOM   2615  C2'  DC A  83     -36.625  56.409  -8.400  3.00  0.00           C  
ATOM   2616  C1'  DC A  83     -37.318  55.197  -7.800  3.00  0.00           C  
ATOM   2617  N1   DC A  83     -36.621  54.675  -6.550  9.00  0.00           N  
ATOM   2618  C2   DC A  83     -37.287  54.869  -5.340  0.00  0.00           C  
ATOM   2619  O2   DC A  83     -38.415  55.433  -5.250  2.00  0.00           O  
ATOM   2620  N3   DC A  83     -36.829  54.430  -4.130  0.00  0.00           N  
ATOM   2621  C4   DC A  83     -35.647  53.906  -4.280  9.00  0.00           C  
ATOM   2622  N4   DC A  83     -35.092  53.614  -3.150  1.00  0.00           N  
ATOM   2623  C5   DC A  83     -34.904  53.689  -5.460  9.00  0.00           C  
ATOM   2624  C6   DC A  83     -35.342  54.131  -6.610  1.00  0.00           C  
ATOM   2625  OP1  DC A  83     -33.498  52.609 -11.660  6.00  0.00           O  
ATOM   2626  OP2  DC A  83     -32.753  53.465  -9.360  5.00  0.00           O1-
ATOM   2627  H5   DC A  83     -33.947  53.176  -5.370  5.00  0.00           H  
ATOM   2628  H6   DC A  83     -34.815  53.893  -7.530  0.00  0.00           H  
ATOM   2629  H1'  DC A  83     -38.422  55.442  -7.570  5.00  0.00           H  
ATOM   2630  H2'  DC A  83     -35.529  56.191  -8.380  2.00  0.00           H  
ATOM   2631  H3'  DC A  83     -36.325  56.946 -10.480  9.00  0.00           H  
ATOM   2632  H4'  DC A  83     -38.000  54.637 -10.700  4.00  0.00           H  
ATOM   2633  H41  DC A  83     -35.555  53.850  -2.270  0.00  0.00           H  
ATOM   2634  H5'  DC A  83     -36.291  53.314 -11.280  8.00  0.00           H  
ATOM   2635  H42  DC A  83     -34.195  53.165  -3.190  8.00  0.00           H  
ATOM   2636 H2''  DC A  83     -36.776  57.309  -7.810  0.00  0.00           H  
ATOM   2637 H5''  DC A  83     -35.956  54.940 -11.950  9.00  0.00           H  
ATOM   2638  P    DC A  84     -38.403  58.597  -9.920  7.00  0.00           P  
ATOM   2639  C5'  DC A  84     -40.382  58.616  -8.180  9.00  0.00           C  
ATOM   2640  O5'  DC A  84     -39.031  58.969  -8.560  6.00  0.00           O  
ATOM   2641  C4'  DC A  84     -40.853  58.900  -6.790  4.00  0.00           C  
ATOM   2642  O4'  DC A  84     -39.947  58.244  -5.850  9.00  0.00           O  
ATOM   2643  C3'  DC A  84     -40.614  60.414  -6.560  3.00  0.00           C  
ATOM   2644  O3'  DC A  84     -41.713  60.916  -5.870  4.00  0.00           O  
ATOM   2645  C2'  DC A  84     -39.283  60.446  -5.860  4.00  0.00           C  
ATOM   2646  C1'  DC A  84     -39.392  59.264  -5.040  3.00  0.00           C  
ATOM   2647  N1   DC A  84     -38.072  58.743  -4.490  1.00  0.00           N  
ATOM   2648  C2   DC A  84     -37.813  58.775  -3.140  8.00  0.00           C  
ATOM   2649  O2   DC A  84     -38.679  59.241  -2.390  2.00  0.00           O  
ATOM   2650  N3   DC A  84     -36.621  58.321  -2.670  1.00  0.00           N  
ATOM   2651  C4   DC A  84     -35.724  57.895  -3.520  9.00  0.00           C  
ATOM   2652  N4   DC A  84     -34.703  57.290  -3.010  5.00  0.00           N  
ATOM   2653  C5   DC A  84     -35.909  57.868  -4.920  8.00  0.00           C  
ATOM   2654  C6   DC A  84     -37.115  58.374  -5.360  0.00  0.00           C  
ATOM   2655  OP1  DC A  84     -39.325  59.053 -10.970  8.00  0.00           O  
ATOM   2656  OP2  DC A  84     -37.035  59.254  -9.940  5.00  0.00           O1-
ATOM   2657  H5   DC A  84     -35.187  57.548  -5.710  0.00  0.00           H  
ATOM   2658  H6   DC A  84     -37.325  58.566  -6.400  3.00  0.00           H  
ATOM   2659  H1'  DC A  84     -40.173  59.383  -4.240  4.00  0.00           H  
ATOM   2660  H2'  DC A  84     -38.412  60.369  -6.550  5.00  0.00           H  
ATOM   2661  H3'  DC A  84     -40.639  60.927  -7.530  9.00  0.00           H  
ATOM   2662  H4'  DC A  84     -41.881  58.534  -6.690  7.00  0.00           H  
ATOM   2663  H41  DC A  84     -34.587  57.439  -2.100  7.00  0.00           H  
ATOM   2664  H5'  DC A  84     -40.455  57.603  -8.430  2.00  0.00           H  
ATOM   2665  H42  DC A  84     -33.886  57.095  -3.470  8.00  0.00           H  
ATOM   2666 H2''  DC A  84     -39.141  61.341  -5.240  6.00  0.00           H  
ATOM   2667 H5''  DC A  84     -41.007  59.243  -8.810  1.00  0.00           H  
ATOM   2668  P    DT A  85     -42.011  62.434  -5.730  0.00  0.00           P  
ATOM   2669  C5'  DT A  85     -42.103  62.299  -3.080  0.00  0.00           C  
ATOM   2670  O5'  DT A  85     -41.410  62.634  -4.210  9.00  0.00           O  
ATOM   2671  C4'  DT A  85     -41.554  63.027  -1.840  4.00  0.00           C  
ATOM   2672  O4'  DT A  85     -40.294  62.409  -1.560  3.00  0.00           O  
ATOM   2673  C3'  DT A  85     -41.301  64.529  -1.980  7.00  0.00           C  
ATOM   2674  O3'  DT A  85     -41.831  65.214  -0.840  7.00  0.00           O  
ATOM   2675  C2'  DT A  85     -39.775  64.602  -2.090  4.00  0.00           C  
ATOM   2676  C1'  DT A  85     -39.358  63.380  -1.230  6.00  0.00           C  
ATOM   2677  N1   DT A  85     -37.999  62.842  -1.380  8.00  0.00           N  
ATOM   2678  C2   DT A  85     -37.430  62.348  -0.150  6.00  0.00           C  
ATOM   2679  O2   DT A  85     -37.827  62.609   1.000  0.00  0.00           O  
ATOM   2680  N3   DT A  85     -36.259  61.694  -0.360  9.00  0.00           N  
ATOM   2681  C4   DT A  85     -35.625  61.496  -1.550  6.00  0.00           C  
ATOM   2682  O4   DT A  85     -34.606  60.851  -1.530  9.00  0.00           O  
ATOM   2683  C5   DT A  85     -36.402  61.878  -2.720  4.00  0.00           C  
ATOM   2684  C6   DT A  85     -37.558  62.527  -2.600  4.00  0.00           C  
ATOM   2685  C7   DT A  85     -35.840  61.643  -4.140  7.00  0.00           C  
ATOM   2686  OP1  DT A  85     -43.437  62.624  -5.710  7.00  0.00           O  
ATOM   2687  OP2  DT A  85     -41.244  63.245  -6.740  6.00  0.00           O1-
ATOM   2688  H3   DT A  85     -35.777  61.314   0.460  8.00  0.00           H  
ATOM   2689  H6   DT A  85     -38.156  62.666  -3.480  3.00  0.00           H  
ATOM   2690  H1'  DT A  85     -39.480  63.845  -0.260  1.00  0.00           H  
ATOM   2691  H2'  DT A  85     -39.450  64.473  -3.090  9.00  0.00           H  
ATOM   2692  H3'  DT A  85     -41.793  64.784  -2.940  4.00  0.00           H  
ATOM   2693  H4'  DT A  85     -42.240  62.925  -1.030  6.00  0.00           H  
ATOM   2694  H5'  DT A  85     -42.075  61.238  -2.970  4.00  0.00           H  
ATOM   2695  H71  DT A  85     -36.577  61.758  -4.930  4.00  0.00           H  
ATOM   2696  H72  DT A  85     -34.922  62.193  -4.470  0.00  0.00           H  
ATOM   2697  H73  DT A  85     -35.509  60.598  -4.120  3.00  0.00           H  
ATOM   2698 H2''  DT A  85     -39.376  65.603  -1.750  7.00  0.00           H  
ATOM   2699 H5''  DT A  85     -43.214  62.610  -3.180  3.00  0.00           H  
ATOM   2700  P    DA A  86     -41.999  66.785  -0.780  9.00  0.00           P  
ATOM   2701  C5'  DA A  86     -40.569  67.312   1.380  8.00  0.00           C  
ATOM   2702  O5'  DA A  86     -40.723  67.440  -0.010  6.00  0.00           O  
ATOM   2703  C4'  DA A  86     -39.080  67.130   1.730  3.00  0.00           C  
ATOM   2704  O4'  DA A  86     -38.580  66.145   0.790  6.00  0.00           O  
ATOM   2705  C3'  DA A  86     -38.160  68.406   1.730  2.00  0.00           C  
ATOM   2706  O3'  DA A  86     -37.167  68.431   2.800  0.00  0.00           O  
ATOM   2707  C2'  DA A  86     -37.320  68.003   0.470  5.00  0.00           C  
ATOM   2708  C1'  DA A  86     -37.207  66.443   0.690  3.00  0.00           C  
ATOM   2709  N1   DA A  86     -33.074  63.513  -0.240  1.00  0.00           N  
ATOM   2710  C2   DA A  86     -33.719  63.783   0.880  4.00  0.00           C  
ATOM   2711  N3   DA A  86     -34.823  64.513   1.030  6.00  0.00           N  
ATOM   2712  C4   DA A  86     -35.273  64.936  -0.150  5.00  0.00           C  
ATOM   2713  C5   DA A  86     -34.663  64.820  -1.370  4.00  0.00           C  
ATOM   2714  C6   DA A  86     -33.486  64.023  -1.380  9.00  0.00           C  
ATOM   2715  N6   DA A  86     -32.914  63.414  -2.450  3.00  0.00           N  
ATOM   2716  N7   DA A  86     -35.548  65.269  -2.350  7.00  0.00           N  
ATOM   2717  C8   DA A  86     -36.487  65.884  -1.700  8.00  0.00           C  
ATOM   2718  N9   DA A  86     -36.362  65.820  -0.390  4.00  0.00           N  
ATOM   2719  OP1  DA A  86     -43.191  67.012   0.070  2.00  0.00           O  
ATOM   2720  OP2  DA A  86     -41.902  67.349  -2.160  0.00  0.00           O1-
ATOM   2721  H2   DA A  86     -33.333  63.431   1.790  5.00  0.00           H  
ATOM   2722  H8   DA A  86     -37.290  66.367  -2.230  5.00  0.00           H  
ATOM   2723  H1'  DA A  86     -36.769  66.339   1.690  1.00  0.00           H  
ATOM   2724  H2'  DA A  86     -37.810  68.265  -0.440  9.00  0.00           H  
ATOM   2725  H3'  DA A  86     -38.641  69.368   1.430  7.00  0.00           H  
ATOM   2726  H4'  DA A  86     -39.091  66.692   2.710  8.00  0.00           H  
ATOM   2727  H5'  DA A  86     -41.013  66.391   1.720  5.00  0.00           H  
ATOM   2728  H61  DA A  86     -32.117  62.822  -2.250  7.00  0.00           H  
ATOM   2729  H62  DA A  86     -33.050  63.756  -3.400  2.00  0.00           H  
ATOM   2730 H2''  DA A  86     -36.370  68.487   0.540  5.00  0.00           H  
ATOM   2731 H5''  DA A  86     -41.010  68.241   1.800  0.00  0.00           H  
ATOM   2732  P    DA A  87     -37.063  69.691   3.760  8.00  0.00           P  
ATOM   2733  C5'  DA A  87     -36.469  68.093   5.700  3.00  0.00           C  
ATOM   2734  O5'  DA A  87     -36.113  69.161   4.860  7.00  0.00           O  
ATOM   2735  C4'  DA A  87     -35.320  67.138   5.820  9.00  0.00           C  
ATOM   2736  O4'  DA A  87     -35.000  66.573   4.530  9.00  0.00           O  
ATOM   2737  C3'  DA A  87     -34.060  67.815   6.340  1.00  0.00           C  
ATOM   2738  O3'  DA A  87     -33.299  67.028   7.200  0.00  0.00           O  
ATOM   2739  C2'  DA A  87     -33.310  68.141   5.070  4.00  0.00           C  
ATOM   2740  C1'  DA A  87     -33.687  67.007   4.140  8.00  0.00           C  
ATOM   2741  N1   DA A  87     -30.424  65.618   0.470  9.00  0.00           N  
ATOM   2742  C2   DA A  87     -30.549  65.319   1.770  8.00  0.00           C  
ATOM   2743  N3   DA A  87     -31.517  65.705   2.610  9.00  0.00           N  
ATOM   2744  C4   DA A  87     -32.384  66.584   2.040  8.00  0.00           C  
ATOM   2745  C5   DA A  87     -32.419  67.033   0.740  9.00  0.00           C  
ATOM   2746  C6   DA A  87     -31.411  66.413  -0.040  4.00  0.00           C  
ATOM   2747  N6   DA A  87     -31.296  66.582  -1.340  9.00  0.00           N  
ATOM   2748  N7   DA A  87     -33.317  68.080   0.590  1.00  0.00           N  
ATOM   2749  C8   DA A  87     -33.910  68.095   1.760  3.00  0.00           C  
ATOM   2750  N9   DA A  87     -33.424  67.168   2.700  5.00  0.00           N  
ATOM   2751  OP1  DA A  87     -38.423  69.913   4.280  9.00  0.00           O  
ATOM   2752  OP2  DA A  87     -36.313  70.731   3.040  9.00  0.00           O1-
ATOM   2753  H2   DA A  87     -29.778  64.683   2.150  2.00  0.00           H  
ATOM   2754  H8   DA A  87     -34.647  68.821   1.970  3.00  0.00           H  
ATOM   2755  H1'  DA A  87     -32.922  66.279   4.450  1.00  0.00           H  
ATOM   2756  H2'  DA A  87     -33.571  69.086   4.680  6.00  0.00           H  
ATOM   2757  H3'  DA A  87     -34.445  68.630   6.890  1.00  0.00           H  
ATOM   2758  H4'  DA A  87     -35.688  66.370   6.460  5.00  0.00           H  
ATOM   2759  H5'  DA A  87     -37.346  67.582   5.340  0.00  0.00           H  
ATOM   2760  H61  DA A  87     -30.551  66.065  -1.790  4.00  0.00           H  
ATOM   2761  H62  DA A  87     -31.917  67.166  -1.850  8.00  0.00           H  
ATOM   2762 H2''  DA A  87     -32.232  68.116   5.150  6.00  0.00           H  
ATOM   2763 H5''  DA A  87     -36.786  68.434   6.690  2.00  0.00           H  
ATOM   2764  P    DC A  88     -32.163  67.635   8.140  6.00  0.00           P  
ATOM   2765  C5'  DC A  88     -30.333  66.085   7.300  6.00  0.00           C  
ATOM   2766  O5'  DC A  88     -30.773  67.419   7.420  5.00  0.00           O  
ATOM   2767  C4'  DC A  88     -29.145  65.838   6.490  1.00  0.00           C  
ATOM   2768  O4'  DC A  88     -29.353  66.164   5.130  9.00  0.00           O  
ATOM   2769  C3'  DC A  88     -27.882  66.575   6.940  3.00  0.00           C  
ATOM   2770  O3'  DC A  88     -26.664  65.843   6.910  2.00  0.00           O  
ATOM   2771  C2'  DC A  88     -27.831  67.647   5.800  7.00  0.00           C  
ATOM   2772  C1'  DC A  88     -28.196  66.813   4.650  2.00  0.00           C  
ATOM   2773  N1   DC A  88     -28.479  67.585   3.400  3.00  0.00           N  
ATOM   2774  C2   DC A  88     -27.592  67.467   2.330  4.00  0.00           C  
ATOM   2775  O2   DC A  88     -26.637  66.694   2.390  1.00  0.00           O  
ATOM   2776  N3   DC A  88     -27.852  68.054   1.130  2.00  0.00           N  
ATOM   2777  C4   DC A  88     -28.892  68.904   1.100  1.00  0.00           C  
ATOM   2778  N4   DC A  88     -29.210  69.470  -0.010  4.00  0.00           N  
ATOM   2779  C5   DC A  88     -29.658  69.343   2.230  6.00  0.00           C  
ATOM   2780  C6   DC A  88     -29.511  68.505   3.350  1.00  0.00           C  
ATOM   2781  OP1  DC A  88     -32.313  66.871   9.430  4.00  0.00           O  
ATOM   2782  OP2  DC A  88     -32.285  69.105   8.260  8.00  0.00           O1-
ATOM   2783  H5   DC A  88     -30.486  70.060   2.220  0.00  0.00           H  
ATOM   2784  H6   DC A  88     -30.156  68.503   4.170  8.00  0.00           H  
ATOM   2785  H1'  DC A  88     -27.393  66.056   4.570  3.00  0.00           H  
ATOM   2786  H2'  DC A  88     -28.632  68.461   5.950  7.00  0.00           H  
ATOM   2787  H3'  DC A  88     -28.102  67.164   7.850  5.00  0.00           H  
ATOM   2788  H4'  DC A  88     -28.853  64.774   6.610  5.00  0.00           H  
ATOM   2789  H41  DC A  88     -28.862  69.093  -0.920  6.00  0.00           H  
ATOM   2790  H5'  DC A  88     -31.162  65.459   6.930  6.00  0.00           H  
ATOM   2791  H42  DC A  88     -29.885  70.174  -0.010  1.00  0.00           H  
ATOM   2792 H2''  DC A  88     -26.822  68.008   5.730  7.00  0.00           H  
ATOM   2793 H5''  DC A  88     -30.177  65.786   8.300  9.00  0.00           H  
ATOM   2794  P    DC A  89     -25.311  66.345   7.590  8.00  0.00           P  
ATOM   2795  C5'  DC A  89     -23.514  65.818   5.740  7.00  0.00           C  
ATOM   2796  O5'  DC A  89     -24.391  66.799   6.380  6.00  0.00           O  
ATOM   2797  C4'  DC A  89     -22.739  66.625   4.720  4.00  0.00           C  
ATOM   2798  O4'  DC A  89     -23.570  67.121   3.630  2.00  0.00           O  
ATOM   2799  C3'  DC A  89     -21.925  67.769   5.350  0.00  0.00           C  
ATOM   2800  O3'  DC A  89     -20.512  67.680   5.140  7.00  0.00           O  
ATOM   2801  C2'  DC A  89     -22.522  68.963   4.660  2.00  0.00           C  
ATOM   2802  C1'  DC A  89     -22.927  68.305   3.300  8.00  0.00           C  
ATOM   2803  N1   DC A  89     -23.836  69.182   2.560  2.00  0.00           N  
ATOM   2804  C2   DC A  89     -23.306  69.799   1.390  2.00  0.00           C  
ATOM   2805  O2   DC A  89     -22.209  69.471   0.850  1.00  0.00           O  
ATOM   2806  N3   DC A  89     -24.063  70.861   0.770  8.00  0.00           N  
ATOM   2807  C4   DC A  89     -25.195  71.234   1.350  5.00  0.00           C  
ATOM   2808  N4   DC A  89     -25.840  72.190   0.770  7.00  0.00           N  
ATOM   2809  C5   DC A  89     -25.613  70.660   2.550  8.00  0.00           C  
ATOM   2810  C6   DC A  89     -25.030  69.564   3.100  5.00  0.00           C  
ATOM   2811  OP1  DC A  89     -24.727  65.161   8.240  7.00  0.00           O  
ATOM   2812  OP2  DC A  89     -25.567  67.507   8.420  9.00  0.00           O1-
ATOM   2813  H5   DC A  89     -26.484  70.966   3.080  3.00  0.00           H  
ATOM   2814  H6   DC A  89     -25.442  68.965   3.860  8.00  0.00           H  
ATOM   2815  H1'  DC A  89     -22.066  68.090   2.740  1.00  0.00           H  
ATOM   2816  H2'  DC A  89     -23.356  69.351   5.190  8.00  0.00           H  
ATOM   2817  H3'  DC A  89     -22.180  67.749   6.440  2.00  0.00           H  
ATOM   2818  H4'  DC A  89     -21.972  65.909   4.330  0.00  0.00           H  
ATOM   2819  H41  DC A  89     -25.440  72.524  -0.110  8.00  0.00           H  
ATOM   2820  H5'  DC A  89     -23.986  64.967   5.390  3.00  0.00           H  
ATOM   2821  H42  DC A  89     -26.742  72.362   1.110  9.00  0.00           H  
ATOM   2822 H2''  DC A  89     -21.833  69.823   4.590  2.00  0.00           H  
ATOM   2823 H5''  DC A  89     -22.734  65.474   6.410  9.00  0.00           H  
ATOM   2824  P   DC3 A  90     -19.453  68.229   6.230  1.00  0.00           P  
ATOM   2825  C5' DC3 A  90     -18.787  70.414   4.930  5.00  0.00           C  
ATOM   2826  O5' DC3 A  90     -19.513  69.791   5.940  2.00  0.00           O  
ATOM   2827  C4' DC3 A  90     -18.981  71.952   4.850  5.00  0.00           C  
ATOM   2828  O4' DC3 A  90     -20.212  72.356   4.270  6.00  0.00           O  
ATOM   2829  C3' DC3 A  90     -18.853  72.621   6.240  9.00  0.00           C  
ATOM   2830  O3' DC3 A  90     -17.940  73.620   6.220  2.00  0.00           O  
ATOM   2831  C2' DC3 A  90     -20.302  73.192   6.300  8.00  0.00           C  
ATOM   2832  C1' DC3 A  90     -20.514  73.613   4.900  3.00  0.00           C  
ATOM   2833  N1  DC3 A  90     -21.972  73.967   4.660  6.00  0.00           N  
ATOM   2834  C2  DC3 A  90     -22.269  74.860   3.590  2.00  0.00           C  
ATOM   2835  O2  DC3 A  90     -21.330  75.400   2.930  8.00  0.00           O  
ATOM   2836  N3  DC3 A  90     -23.621  75.065   3.280  3.00  0.00           N  
ATOM   2837  C4  DC3 A  90     -24.592  74.375   3.840  2.00  0.00           C  
ATOM   2838  N4  DC3 A  90     -25.770  74.701   3.450  9.00  0.00           N  
ATOM   2839  C5  DC3 A  90     -24.314  73.345   4.810  4.00  0.00           C  
ATOM   2840  C6  DC3 A  90     -23.015  73.102   5.120  0.00  0.00           C  
ATOM   2841  OP1 DC3 A  90     -18.116  67.688   5.850  6.00  0.00           O  
ATOM   2842  OP2 DC3 A  90     -19.979  67.951   7.600  7.00  0.00           O  
ATOM   2843 HO3' DC3 A  90     -18.242  74.521   6.660  1.00  0.00           H  
ATOM   2844  H5  DC3 A  90     -25.166  72.665   5.160  7.00  0.00           H  
ATOM   2845  H6  DC3 A  90     -22.687  72.278   5.760  4.00  0.00           H  
ATOM   2846  H1' DC3 A  90     -19.792  74.405   4.610  8.00  0.00           H  
ATOM   2847  H2' DC3 A  90     -20.965  72.438   6.690  6.00  0.00           H  
ATOM   2848  H3' DC3 A  90     -18.789  71.907   7.080  9.00  0.00           H  
ATOM   2849  H4' DC3 A  90     -18.107  72.299   4.210  5.00  0.00           H  
ATOM   2850  H41 DC3 A  90     -26.512  74.281   3.960  5.00  0.00           H  
ATOM   2851  H5' DC3 A  90     -19.196  70.127   4.050  5.00  0.00           H  
ATOM   2852  H42 DC3 A  90     -25.856  75.428   2.770  5.00  0.00           H  
ATOM   2853 H2'' DC3 A  90     -20.457  74.073   6.980  3.00  0.00           H  
ATOM   2854 H5'' DC3 A  90     -17.719  70.175   5.000  2.00  0.00           H  
ATOM   2855  C   CNT A  94     -52.681  51.843  10.760  4.00  0.00           C  
ATOM   2856  C   CNT A  94     -53.050  51.220   9.570  6.00  0.00           C  
ATOM   2857  C   CNT A  94     -51.969  50.453   9.030  9.00  0.00           C  
ATOM   2858  C   CNT A  94     -52.032  50.034   7.700  3.00  0.00           C  
ATOM   2859  C   CNT A  94     -54.136  51.497   8.630  7.00  0.00           C  
ATOM   2860  C   CNT A  94     -53.702  51.769   7.260  7.00  0.00           C  
ATOM   2861  C   CNT A  94     -52.632  50.952   6.770  1.00  0.00           C  
ATOM   2862  C   CNT A  94     -52.120  51.086   5.480  3.00  0.00           C  
ATOM   2863  C   CNT A  94     -54.076  52.816   6.350  1.00  0.00           C  
ATOM   2864  C   CNT A  94     -53.156  53.307   5.430  1.00  0.00           C  
ATOM   2865  C   CNT A  94     -52.262  52.306   4.820  3.00  0.00           C  
ATOM   2866  C   CNT A  94     -51.236  52.702   3.890  9.00  0.00           C  
ATOM   2867  C   CNT A  94     -53.001  54.624   4.950  0.00  0.00           C  
ATOM   2868  C   CNT A  94     -51.782  55.069   4.370  7.00  0.00           C  
ATOM   2869  C   CNT A  94     -50.902  54.101   3.830  5.00  0.00           C  
ATOM   2870  C   CNT A  94     -49.526  54.472   3.590  9.00  0.00           C  
ATOM   2871  C   CNT A  94     -51.218  56.422   4.490  7.00  0.00           C  
ATOM   2872  C   CNT A  94     -49.852  56.599   4.690  8.00  0.00           C  
ATOM   2873  C   CNT A  94     -48.967  55.523   4.250  0.00  0.00           C  
ATOM   2874  C   CNT A  94     -47.633  55.496   4.840  2.00  0.00           C  
ATOM   2875  C   CNT A  94     -49.334  57.620   5.510  3.00  0.00           C  
ATOM   2876  C   CNT A  94     -48.264  57.338   6.350  0.00  0.00           C  
ATOM   2877  C   CNT A  94     -47.373  56.325   5.880  5.00  0.00           C  
ATOM   2878  C   CNT A  94     -46.292  55.905   6.710  2.00  0.00           C  
ATOM   2879  C   CNT A  94     -47.880  57.859   7.600  4.00  0.00           C  
ATOM   2880  C   CNT A  94     -47.244  57.129   8.600  1.00  0.00           C  
ATOM   2881  C   CNT A  94     -46.391  56.107   8.070  9.00  0.00           C  
ATOM   2882  C   CNT A  94     -46.154  54.978   8.870  4.00  0.00           C  
ATOM   2883  C   CNT A  94     -47.551  57.044  10.000  6.00  0.00           C  
ATOM   2884  C   CNT A  94     -47.919  55.726  10.490  2.00  0.00           C  
ATOM   2885  C   CNT A  94     -47.099  54.641   9.950  2.00  0.00           C  
ATOM   2886  C   CNT A  94     -47.312  53.285  10.280  9.00  0.00           C  
ATOM   2887  C   CNT A  94     -48.942  55.199  11.340  4.00  0.00           C  
ATOM   2888  C   CNT A  94     -49.583  53.945  11.120  2.00  0.00           C  
ATOM   2889  C   CNT A  94     -48.637  52.945  10.740  6.00  0.00           C  
ATOM   2890  C   CNT A  94     -48.983  51.611  10.580  7.00  0.00           C  
ATOM   2891  C   CNT A  94     -50.825  53.410  11.340  4.00  0.00           C  
ATOM   2892  C   CNT A  94     -51.353  52.195  11.010  7.00  0.00           C  
ATOM   2893  C   CNT A  94     -50.337  51.269  10.600  3.00  0.00           C  
ATOM   2894  C   CNT A  94     -50.804  50.305   9.670  8.00  0.00           C  
ATOM   2895  C   CNT A  94     -49.845  49.391   9.210  4.00  0.00           C  
ATOM   2896  C   CNT A  94     -50.110  48.632   8.070  2.00  0.00           C  
ATOM   2897  C   CNT A  94     -49.218  47.643   7.660  8.00  0.00           C  
ATOM   2898  C   CNT A  94     -49.252  47.204   6.300  7.00  0.00           C  
ATOM   2899  C   CNT A  94     -51.125  49.094   7.220  5.00  0.00           C  
ATOM   2900  C   CNT A  94     -50.920  49.016   5.810  9.00  0.00           C  
ATOM   2901  C   CNT A  94     -50.042  47.969   5.370  4.00  0.00           C  
ATOM   2902  C   CNT A  94     -49.539  48.100   4.020  8.00  0.00           C  
ATOM   2903  C   CNT A  94     -51.191  50.166   5.000  3.00  0.00           C  
ATOM   2904  C   CNT A  94     -50.421  50.398   3.860  5.00  0.00           C  
ATOM   2905  C   CNT A  94     -49.587  49.393   3.410  2.00  0.00           C  
ATOM   2906  C   CNT A  94     -48.518  49.821   2.490  6.00  0.00           C  
ATOM   2907  C   CNT A  94     -50.319  51.761   3.420  0.00  0.00           C  
ATOM   2908  C   CNT A  94     -49.108  52.175   2.870  2.00  0.00           C  
ATOM   2909  C   CNT A  94     -48.211  51.182   2.400  4.00  0.00           C  
ATOM   2910  C   CNT A  94     -46.864  51.505   2.240  0.00  0.00           C  
ATOM   2911  C   CNT A  94     -48.605  53.471   3.080  7.00  0.00           C  
ATOM   2912  C   CNT A  94     -47.202  53.654   3.380  1.00  0.00           C  
ATOM   2913  C   CNT A  94     -46.333  52.685   2.910  6.00  0.00           C  
ATOM   2914  C   CNT A  94     -44.952  52.729   3.270  1.00  0.00           C  
ATOM   2915  C   CNT A  94     -46.701  54.627   4.300  9.00  0.00           C  
ATOM   2916  C   CNT A  94     -45.453  54.546   4.910  6.00  0.00           C  
ATOM   2917  C   CNT A  94     -44.576  53.502   4.410  6.00  0.00           C  
ATOM   2918  C   CNT A  94     -43.606  52.987   5.300  0.00  0.00           C  
ATOM   2919  C   CNT A  94     -45.378  54.980   6.210  2.00  0.00           C  
ATOM   2920  C   CNT A  94     -44.761  54.081   7.150  0.00  0.00           C  
ATOM   2921  C   CNT A  94     -43.785  53.149   6.710  9.00  0.00           C  
ATOM   2922  C   CNT A  94     -43.564  52.015   7.500  2.00  0.00           C  
ATOM   2923  C   CNT A  94     -45.314  53.979   8.430  9.00  0.00           C  
ATOM   2924  C   CNT A  94     -45.359  52.699   9.090  5.00  0.00           C  
ATOM   2925  C   CNT A  94     -44.456  51.693   8.540  6.00  0.00           C  
ATOM   2926  C   CNT A  94     -44.569  50.390   9.050  3.00  0.00           C  
ATOM   2927  C   CNT A  94     -46.445  52.357   9.900  6.00  0.00           C  
ATOM   2928  C   CNT A  94     -46.672  51.023  10.080  7.00  0.00           C  
ATOM   2929  C   CNT A  94     -45.755  50.023   9.640  5.00  0.00           C  
ATOM   2930  C   CNT A  94     -46.176  48.702   9.330  2.00  0.00           C  
ATOM   2931  C   CNT A  94     -48.043  50.621  10.350  7.00  0.00           C  
ATOM   2932  C   CNT A  94     -48.512  49.463   9.640  9.00  0.00           C  
ATOM   2933  C   CNT A  94     -47.602  48.409   9.300  0.00  0.00           C  
ATOM   2934  C   CNT A  94     -48.060  47.460   8.360  0.00  0.00           C  
ATOM   2935  C   CNT A  94     -47.125  46.483   7.920  2.00  0.00           C  
ATOM   2936  C   CNT A  94     -47.384  45.721   6.760  3.00  0.00           C  
ATOM   2937  C   CNT A  94     -46.483  44.773   6.250  7.00  0.00           C  
ATOM   2938  C   CNT A  94     -46.548  44.368   4.880  0.00  0.00           C  
ATOM   2939  C   CNT A  94     -48.353  46.286   5.840  5.00  0.00           C  
ATOM   2940  C   CNT A  94     -48.081  46.199   4.460  0.00  0.00           C  
ATOM   2941  C   CNT A  94     -47.120  45.264   4.000  4.00  0.00           C  
ATOM   2942  C   CNT A  94     -46.738  45.291   2.630  2.00  0.00           C  
ATOM   2943  C   CNT A  94     -48.551  47.202   3.600  8.00  0.00           C  
ATOM   2944  C   CNT A  94     -47.792  47.480   2.470  6.00  0.00           C  
ATOM   2945  C   CNT A  94     -46.849  46.556   1.950  9.00  0.00           C  
ATOM   2946  C   CNT A  94     -45.825  46.909   1.070  5.00  0.00           C  
ATOM   2947  C   CNT A  94     -47.704  48.800   1.990  5.00  0.00           C  
ATOM   2948  C   CNT A  94     -46.450  49.177   1.550  2.00  0.00           C  
ATOM   2949  C   CNT A  94     -45.532  48.288   0.980  1.00  0.00           C  
ATOM   2950  C   CNT A  94     -44.182  48.597   0.860  0.00  0.00           C  
ATOM   2951  C   CNT A  94     -45.965  50.482   1.880  4.00  0.00           C  
ATOM   2952  C   CNT A  94     -44.582  50.702   1.970  1.00  0.00           C  
ATOM   2953  C   CNT A  94     -43.652  49.763   1.400  7.00  0.00           C  
ATOM   2954  C   CNT A  94     -42.314  49.836   1.810  1.00  0.00           C  
ATOM   2955  C   CNT A  94     -44.133  51.705   2.830  9.00  0.00           C  
ATOM   2956  C   CNT A  94     -42.912  51.498   3.530  1.00  0.00           C  
ATOM   2957  C   CNT A  94     -42.071  50.501   2.990  6.00  0.00           C  
ATOM   2958  C   CNT A  94     -41.112  49.996   3.840  8.00  0.00           C  
ATOM   2959  C   CNT A  94     -42.791  51.943   4.860  0.00  0.00           C  
ATOM   2960  C   CNT A  94     -42.233  51.099   5.760  3.00  0.00           C  
ATOM   2961  C   CNT A  94     -41.323  50.102   5.230  1.00  0.00           C  
ATOM   2962  C   CNT A  94     -40.930  49.075   6.110  7.00  0.00           C  
ATOM   2963  C   CNT A  94     -42.635  51.049   7.100  6.00  0.00           C  
ATOM   2964  C   CNT A  94     -42.597  49.794   7.700  4.00  0.00           C  
ATOM   2965  C   CNT A  94     -41.744  48.815   7.230  6.00  0.00           C  
ATOM   2966  C   CNT A  94     -41.831  47.481   7.730  3.00  0.00           C  
ATOM   2967  C   CNT A  94     -43.669  49.456   8.580  7.00  0.00           C  
ATOM   2968  C   CNT A  94     -43.935  48.089   8.740  0.00  0.00           C  
ATOM   2969  C   CNT A  94     -43.026  47.091   8.290  5.00  0.00           C  
ATOM   2970  C   CNT A  94     -43.470  45.729   8.140  5.00  0.00           C  
ATOM   2971  C   CNT A  94     -45.290  47.733   8.900  3.00  0.00           C  
ATOM   2972  C   CNT A  94     -45.734  46.519   8.370  8.00  0.00           C  
ATOM   2973  C   CNT A  94     -44.831  45.547   7.890  3.00  0.00           C  
ATOM   2974  C   CNT A  94     -45.275  44.513   7.010  1.00  0.00           C  
ATOM   2975  C   CNT A  94     -44.357  43.641   6.450  5.00  0.00           C  
ATOM   2976  C   CNT A  94     -44.583  43.016   5.240  9.00  0.00           C  
ATOM   2977  C   CNT A  94     -43.699  42.027   4.830  6.00  0.00           C  
ATOM   2978  C   CNT A  94     -43.853  41.572   3.470  6.00  0.00           C  
ATOM   2979  C   CNT A  94     -45.623  43.484   4.420  0.00  0.00           C  
ATOM   2980  C   CNT A  94     -45.349  43.383   3.050  9.00  0.00           C  
ATOM   2981  C   CNT A  94     -44.490  42.388   2.500  5.00  0.00           C  
ATOM   2982  C   CNT A  94     -43.961  42.492   1.220  9.00  0.00           C  
ATOM   2983  C   CNT A  94     -45.758  44.386   2.160  1.00  0.00           C  
ATOM   2984  C   CNT A  94     -45.119  44.615   0.930  0.00  0.00           C  
ATOM   2985  C   CNT A  94     -44.112  43.683   0.480  4.00  0.00           C  
ATOM   2986  C   CNT A  94     -43.196  44.093  -0.440  2.00  0.00           C  
ATOM   2987  C   CNT A  94     -45.010  45.954   0.440  3.00  0.00           C  
ATOM   2988  C   CNT A  94     -43.727  46.367   0.050  8.00  0.00           C  
ATOM   2989  C   CNT A  94     -42.875  45.452  -0.470  3.00  0.00           C  
ATOM   2990  C   CNT A  94     -41.507  45.748  -0.640  7.00  0.00           C  
ATOM   2991  C   CNT A  94     -43.254  47.696   0.310  5.00  0.00           C  
ATOM   2992  C   CNT A  94     -41.911  47.837   0.460  3.00  0.00           C  
ATOM   2993  C   CNT A  94     -41.023  46.909  -0.040  4.00  0.00           C  
ATOM   2994  C   CNT A  94     -39.735  46.969   0.450  6.00  0.00           C  
ATOM   2995  C   CNT A  94     -41.473  48.888   1.260  5.00  0.00           C  
ATOM   2996  C   CNT A  94     -40.282  48.649   2.020  3.00  0.00           C  
ATOM   2997  C   CNT A  94     -39.449  47.645   1.610  3.00  0.00           C  
ATOM   2998  C   CNT A  94     -38.525  47.048   2.450  8.00  0.00           C  
ATOM   2999  C   CNT A  94     -40.191  49.089   3.340  9.00  0.00           C  
ATOM   3000  C   CNT A  94     -39.595  48.200   4.310  8.00  0.00           C  
ATOM   3001  C   CNT A  94     -38.690  47.267   3.840  6.00  0.00           C  
ATOM   3002  C   CNT A  94     -38.374  46.125   4.660  7.00  0.00           C  
ATOM   3003  C   CNT A  94     -40.059  48.116   5.600  3.00  0.00           C  
ATOM   3004  C   CNT A  94     -39.951  46.909   6.310  9.00  0.00           C  
ATOM   3005  C   CNT A  94     -39.085  45.903   5.830  6.00  0.00           C  
ATOM   3006  C   CNT A  94     -39.084  44.558   6.380  0.00  0.00           C  
ATOM   3007  C   CNT A  94     -40.932  46.529   7.250  5.00  0.00           C  
ATOM   3008  C   CNT A  94     -41.209  45.200   7.450  2.00  0.00           C  
ATOM   3009  C   CNT A  94     -40.302  44.184   7.040  8.00  0.00           C  
ATOM   3010  C   CNT A  94     -40.763  42.890   6.710  4.00  0.00           C  
ATOM   3011  C   CNT A  94     -42.575  44.758   7.640  7.00  0.00           C  
ATOM   3012  C   CNT A  94     -43.065  43.636   6.960  1.00  0.00           C  
ATOM   3013  C   CNT A  94     -42.166  42.646   6.530  0.00  0.00           C  
ATOM   3014  C   CNT A  94     -42.536  41.757   5.500  8.00  0.00           C  
ATOM   3015  C   CNT A  94     -41.715  40.745   5.050  5.00  0.00           C  
ATOM   3016  C   CNT A  94     -41.967  39.993   3.880  5.00  0.00           C  
ATOM   3017  C   CNT A  94     -41.071  39.033   3.490  7.00  0.00           C  
ATOM   3018  C   CNT A  94     -41.058  38.765   2.080  7.00  0.00           C  
ATOM   3019  C   CNT A  94     -42.883  40.617   3.050  1.00  0.00           C  
ATOM   3020  C   CNT A  94     -42.611  40.592   1.660  0.00  0.00           C  
ATOM   3021  C   CNT A  94     -41.731  39.571   1.180  8.00  0.00           C  
ATOM   3022  C   CNT A  94     -41.204  39.653  -0.120  7.00  0.00           C  
ATOM   3023  C   CNT A  94     -43.074  41.559   0.760  9.00  0.00           C  
ATOM   3024  C   CNT A  94     -42.343  41.811  -0.380  8.00  0.00           C  
ATOM   3025  C   CNT A  94     -41.365  40.849  -0.850  9.00  0.00           C  
ATOM   3026  C   CNT A  94     -40.391  41.266  -1.830  7.00  0.00           C  
ATOM   3027  C   CNT A  94     -42.285  43.121  -0.900  7.00  0.00           C  
ATOM   3028  C   CNT A  94     -41.021  43.511  -1.420  9.00  0.00           C  
ATOM   3029  C   CNT A  94     -40.107  42.612  -1.940  5.00  0.00           C  
ATOM   3030  C   CNT A  94     -38.785  43.010  -2.160  1.00  0.00           C  
ATOM   3031  C   CNT A  94     -40.595  44.816  -1.130  3.00  0.00           C  
ATOM   3032  C   CNT A  94     -39.245  45.057  -0.960  6.00  0.00           C  
ATOM   3033  C   CNT A  94     -38.332  44.132  -1.480  4.00  0.00           C  
ATOM   3034  C   CNT A  94     -36.959  44.215  -1.060  8.00  0.00           C  
ATOM   3035  C   CNT A  94     -38.763  46.073  -0.110  7.00  0.00           C  
ATOM   3036  C   CNT A  94     -37.614  45.802   0.590  7.00  0.00           C  
ATOM   3037  C   CNT A  94     -36.623  44.939   0.100  2.00  0.00           C  
ATOM   3038  C   CNT A  94     -35.728  44.360   1.060  5.00  0.00           C  
ATOM   3039  C   CNT A  94     -37.622  46.109   1.960  3.00  0.00           C  
ATOM   3040  C   CNT A  94     -36.917  45.327   2.880  1.00  0.00           C  
ATOM   3041  C   CNT A  94     -35.958  44.461   2.430  5.00  0.00           C  
ATOM   3042  C   CNT A  94     -35.518  43.354   3.240  6.00  0.00           C  
ATOM   3043  C   CNT A  94     -37.423  45.206   4.180  6.00  0.00           C  
ATOM   3044  C   CNT A  94     -37.295  43.954   4.810  5.00  0.00           C  
ATOM   3045  C   CNT A  94     -36.344  43.059   4.360  7.00  0.00           C  
ATOM   3046  C   CNT A  94     -36.454  41.744   4.780  1.00  0.00           C  
ATOM   3047  C   CNT A  94     -38.273  43.544   5.800  9.00  0.00           C  
ATOM   3048  C   CNT A  94     -38.604  42.225   5.920  0.00  0.00           C  
ATOM   3049  C   CNT A  94     -37.675  41.313   5.360  4.00  0.00           C  
ATOM   3050  C   CNT A  94     -38.077  39.984   5.250  7.00  0.00           C  
ATOM   3051  C   CNT A  94     -39.913  41.839   6.180  8.00  0.00           C  
ATOM   3052  C   CNT A  94     -40.412  40.703   5.500  0.00  0.00           C  
ATOM   3053  C   CNT A  94     -39.483  39.664   5.190  2.00  0.00           C  
ATOM   3054  C   CNT A  94     -39.891  38.752   4.160  7.00  0.00           C  
ATOM   3055  C   CNT A  94     -38.935  37.856   3.670  2.00  0.00           C  
ATOM   3056  C   CNT A  94     -39.258  37.189   2.410  3.00  0.00           C  
ATOM   3057  C   CNT A  94     -38.361  36.227   1.900  1.00  0.00           C  
ATOM   3058  C   CNT A  94     -38.532  35.631   0.560  4.00  0.00           C  
ATOM   3059  C   CNT A  94     -40.285  37.718   1.520  9.00  0.00           C  
ATOM   3060  C   CNT A  94     -40.088  37.529   0.110  1.00  0.00           C  
ATOM   3061  C   CNT A  94     -39.179  36.567  -0.340  4.00  0.00           C  
ATOM   3062  C   CNT A  94     -38.527  36.781  -1.540  6.00  0.00           C  
ATOM   3063  C   CNT A  94     -40.424  38.639  -0.670  2.00  0.00           C  
ATOM   3064  C   CNT A  94     -39.586  39.015  -1.750  6.00  0.00           C  
ATOM   3065  C   CNT A  94     -38.716  38.030  -2.220  7.00  0.00           C  
ATOM   3066  C   CNT A  94     -37.817  38.404  -3.260  3.00  0.00           C  
ATOM   3067  C   CNT A  94     -39.446  40.312  -2.240  9.00  0.00           C  
ATOM   3068  C   CNT A  94     -38.348  40.746  -2.930  2.00  0.00           C  
ATOM   3069  C   CNT A  94     -37.430  39.783  -3.280  4.00  0.00           C  
ATOM   3070  C   CNT A  94     -36.104  40.064  -3.340  7.00  0.00           C  
ATOM   3071  C   CNT A  94     -37.882  42.074  -2.640  9.00  0.00           C  
ATOM   3072  C   CNT A  94     -36.502  42.178  -2.350  1.00  0.00           C  
ATOM   3073  C   CNT A  94     -35.605  41.255  -2.880  6.00  0.00           C  
ATOM   3074  C   CNT A  94     -34.246  41.346  -2.440  6.00  0.00           C  
ATOM   3075  C   CNT A  94     -36.087  43.169  -1.460  0.00  0.00           C  
ATOM   3076  C   CNT A  94     -34.874  42.953  -0.740  6.00  0.00           C  
ATOM   3077  C   CNT A  94     -34.008  41.956  -1.210  9.00  0.00           C  
ATOM   3078  C   CNT A  94     -33.056  41.388  -0.340  3.00  0.00           C  
ATOM   3079  C   CNT A  94     -34.853  43.337   0.580  3.00  0.00           C  
ATOM   3080  C   CNT A  94     -34.091  42.552   1.500  0.00  0.00           C  
ATOM   3081  C   CNT A  94     -33.202  41.583   1.010  2.00  0.00           C  
ATOM   3082  C   CNT A  94     -32.725  40.596   1.890  7.00  0.00           C  
ATOM   3083  C   CNT A  94     -34.606  42.397   2.830  1.00  0.00           C  
ATOM   3084  C   CNT A  94     -34.410  41.175   3.510  6.00  0.00           C  
ATOM   3085  C   CNT A  94     -33.511  40.275   3.010  2.00  0.00           C  
ATOM   3086  C   CNT A  94     -33.639  38.918   3.360  0.00  0.00           C  
ATOM   3087  C   CNT A  94     -35.438  40.789   4.430  2.00  0.00           C  
ATOM   3088  C   CNT A  94     -35.743  39.430   4.570  8.00  0.00           C  
ATOM   3089  C   CNT A  94     -34.860  38.506   3.890  3.00  0.00           C  
ATOM   3090  C   CNT A  94     -35.331  37.210   3.610  7.00  0.00           C  
ATOM   3091  C   CNT A  94     -37.111  39.003   4.790  1.00  0.00           C  
ATOM   3092  C   CNT A  94     -37.629  37.835   4.170  3.00  0.00           C  
ATOM   3093  C   CNT A  94     -36.696  36.941   3.490  1.00  0.00           C  
ATOM   3094  C   CNT A  94     -37.131  36.009   2.500  5.00  0.00           C  
ATOM   3095  C   CNT A  94     -36.253  35.056   2.040  0.00  0.00           C  
ATOM   3096  C   CNT A  94     -36.589  34.237   0.950  8.00  0.00           C  
ATOM   3097  C   CNT A  94     -35.688  33.350   0.360  7.00  0.00           C  
ATOM   3098  C   CNT A  94     -35.705  32.950  -1.000  1.00  0.00           C  
ATOM   3099  C   CNT A  94     -37.541  34.774   0.060  9.00  0.00           C  
ATOM   3100  C   CNT A  94     -37.272  34.764  -1.320  2.00  0.00           C  
ATOM   3101  C   CNT A  94     -36.472  33.729  -1.880  9.00  0.00           C  
ATOM   3102  C   CNT A  94     -35.960  33.930  -3.180  7.00  0.00           C  
ATOM   3103  C   CNT A  94     -37.644  35.892  -2.070  4.00  0.00           C  
ATOM   3104  C   CNT A  94     -36.906  36.153  -3.260  5.00  0.00           C  
ATOM   3105  C   CNT A  94     -36.004  35.210  -3.760  7.00  0.00           C  
ATOM   3106  C   CNT A  94     -35.046  35.569  -4.660  9.00  0.00           C  
ATOM   3107  C   CNT A  94     -36.860  37.458  -3.720  4.00  0.00           C  
ATOM   3108  C   CNT A  94     -35.580  37.834  -4.180  8.00  0.00           C  
ATOM   3109  C   CNT A  94     -34.722  36.936  -4.800  2.00  0.00           C  
ATOM   3110  C   CNT A  94     -33.401  37.302  -5.080  0.00  0.00           C  
ATOM   3111  C   CNT A  94     -35.209  39.140  -3.890  1.00  0.00           C  
ATOM   3112  C   CNT A  94     -33.829  39.418  -3.870  9.00  0.00           C  
ATOM   3113  C   CNT A  94     -32.955  38.531  -4.450  4.00  0.00           C  
ATOM   3114  C   CNT A  94     -31.624  38.557  -3.930  6.00  0.00           C  
ATOM   3115  C   CNT A  94     -33.376  40.303  -2.870  4.00  0.00           C  
ATOM   3116  C   CNT A  94     -32.143  40.132  -2.200  3.00  0.00           C  
ATOM   3117  C   CNT A  94     -31.286  39.140  -2.680  1.00  0.00           C  
ATOM   3118  C   CNT A  94     -30.340  38.563  -1.810  7.00  0.00           C  
ATOM   3119  C   CNT A  94     -32.052  40.502  -0.810  2.00  0.00           C  
ATOM   3120  C   CNT A  94     -31.379  39.651   0.050  0.00  0.00           C  
ATOM   3121  C   CNT A  94     -30.470  38.713  -0.450  1.00  0.00           C  
ATOM   3122  C   CNT A  94     -30.048  37.657   0.400  5.00  0.00           C  
ATOM   3123  C   CNT A  94     -31.826  39.623   1.380  5.00  0.00           C  
ATOM   3124  C   CNT A  94     -31.616  38.369   2.090  0.00  0.00           C  
ATOM   3125  C   CNT A  94     -30.762  37.381   1.570  4.00  0.00           C  
ATOM   3126  C   CNT A  94     -30.916  36.023   1.920  3.00  0.00           C  
ATOM   3127  C   CNT A  94     -32.691  37.906   2.910  1.00  0.00           C  
ATOM   3128  C   CNT A  94     -33.066  36.541   2.870  8.00  0.00           C  
ATOM   3129  C   CNT A  94     -32.218  35.570   2.340  1.00  0.00           C  
ATOM   3130  C   CNT A  94     -32.643  34.265   2.160  4.00  0.00           C  
ATOM   3131  C   CNT A  94     -34.411  36.242   3.070  4.00  0.00           C  
ATOM   3132  C   CNT A  94     -34.858  35.117   2.400  4.00  0.00           C  
ATOM   3133  C   CNT A  94     -34.026  34.139   1.940  6.00  0.00           C  
ATOM   3134  C   CNT A  94     -34.419  33.145   1.040  3.00  0.00           C  
ATOM   3135  C   CNT A  94     -33.585  32.174   0.550  5.00  0.00           C  
ATOM   3136  C   CNT A  94     -33.787  31.558  -0.660  1.00  0.00           C  
ATOM   3137  C   CNT A  94     -32.902  30.626  -1.200  7.00  0.00           C  
ATOM   3138  C   CNT A  94     -33.044  30.143  -2.530  4.00  0.00           C  
ATOM   3139  C   CNT A  94     -34.779  32.044  -1.520  6.00  0.00           C  
ATOM   3140  C   CNT A  94     -34.591  31.909  -2.910  1.00  0.00           C  
ATOM   3141  C   CNT A  94     -33.768  30.933  -3.390  0.00  0.00           C  
ATOM   3142  C   CNT A  94     -33.272  31.083  -4.720  0.00  0.00           C  
ATOM   3143  C   CNT A  94     -35.069  32.971  -3.690  0.00  0.00           C  
ATOM   3144  C   CNT A  94     -34.244  33.310  -4.750  8.00  0.00           C  
ATOM   3145  C   CNT A  94     -33.404  32.362  -5.280  5.00  0.00           C  
ATOM   3146  C   CNT A  94     -32.409  32.747  -6.270  6.00  0.00           C  
ATOM   3147  C   CNT A  94     -34.140  34.630  -5.140  5.00  0.00           C  
ATOM   3148  C   CNT A  94     -32.950  35.054  -5.810  7.00  0.00           C  
ATOM   3149  C   CNT A  94     -32.042  34.077  -6.240  0.00  0.00           C  
ATOM   3150  C   CNT A  94     -30.647  34.403  -6.390  5.00  0.00           C  
ATOM   3151  C   CNT A  94     -32.429  36.370  -5.530  2.00  0.00           C  
ATOM   3152  C   CNT A  94     -31.058  36.564  -5.290  8.00  0.00           C  
ATOM   3153  C   CNT A  94     -30.225  35.543  -5.670  9.00  0.00           C  
ATOM   3154  C   CNT A  94     -28.896  35.542  -5.260  9.00  0.00           C  
ATOM   3155  C   CNT A  94     -30.679  37.539  -4.330  1.00  0.00           C  
ATOM   3156  C   CNT A  94     -29.386  37.388  -3.720  4.00  0.00           C  
ATOM   3157  C   CNT A  94     -28.509  36.295  -4.130  6.00  0.00           C  
ATOM   3158  C   CNT A  94     -27.559  35.713  -3.280  2.00  0.00           C  
ATOM   3159  C   CNT A  94     -29.349  37.675  -2.320  9.00  0.00           C  
ATOM   3160  C   CNT A  94     -28.601  36.865  -1.450  6.00  0.00           C  
ATOM   3161  C   CNT A  94     -27.717  35.912  -1.930  2.00  0.00           C  
ATOM   3162  C   CNT A  94     -27.413  34.793  -1.170  3.00  0.00           C  
ATOM   3163  C   CNT A  94     -29.153  36.691  -0.110  3.00  0.00           C  
ATOM   3164  C   CNT A  94     -29.016  35.432   0.470  3.00  0.00           C  
ATOM   3165  C   CNT A  94     -28.213  34.458  -0.050  6.00  0.00           C  
ATOM   3166  C   CNT A  94     -28.328  33.139   0.350  5.00  0.00           C  
ATOM   3167  C   CNT A  94     -30.012  34.993   1.420  6.00  0.00           C  
ATOM   3168  C   CNT A  94     -30.451  33.681   1.430  1.00  0.00           C  
ATOM   3169  C   CNT A  94     -29.531  32.724   0.970  3.00  0.00           C  
ATOM   3170  C   CNT A  94     -29.992  31.420   0.670  4.00  0.00           C  
ATOM   3171  C   CNT A  94     -31.772  33.322   1.620  0.00  0.00           C  
ATOM   3172  C   CNT A  94     -32.239  32.138   1.070  5.00  0.00           C  
ATOM   3173  C   CNT A  94     -31.373  31.166   0.560  2.00  0.00           C  
ATOM   3174  C   CNT A  94     -31.779  30.255  -0.410  2.00  0.00           C  
ATOM   3175  C   CNT A  94     -30.903  29.310  -0.940  7.00  0.00           C  
ATOM   3176  C   CNT A  94     -31.183  28.681  -2.130  2.00  0.00           C  
ATOM   3177  C   CNT A  94     -30.234  27.786  -2.640  5.00  0.00           C  
ATOM   3178  C   CNT A  94     -30.384  27.333  -3.990  1.00  0.00           C  
ATOM   3179  C   CNT A  94     -32.164  29.187  -3.020  5.00  0.00           C  
ATOM   3180  C   CNT A  94     -31.966  29.125  -4.420  2.00  0.00           C  
ATOM   3181  C   CNT A  94     -31.052  28.215  -4.850  8.00  0.00           C  
ATOM   3182  C   CNT A  94     -30.609  28.226  -6.180  2.00  0.00           C  
ATOM   3183  C   CNT A  94     -32.432  30.127  -5.240  4.00  0.00           C  
ATOM   3184  C   CNT A  94     -31.731  30.377  -6.420  2.00  0.00           C  
ATOM   3185  C   CNT A  94     -30.795  29.424  -6.910  6.00  0.00           C  
ATOM   3186  C   CNT A  94     -29.690  29.900  -7.670  3.00  0.00           C  
ATOM   3187  C   CNT A  94     -31.509  31.785  -6.700  7.00  0.00           C  
ATOM   3188  C   CNT A  94     -30.272  32.183  -7.220  3.00  0.00           C  
ATOM   3189  C   CNT A  94     -29.322  31.248  -7.590  2.00  0.00           C  
ATOM   3190  C   CNT A  94     -27.996  31.575  -7.860  0.00  0.00           C  
ATOM   3191  C   CNT A  94     -29.765  33.442  -6.930  3.00  0.00           C  
ATOM   3192  C   CNT A  94     -28.415  33.667  -6.760  1.00  0.00           C  
ATOM   3193  C   CNT A  94     -27.493  32.743  -7.240  8.00  0.00           C  
ATOM   3194  C   CNT A  94     -26.205  32.701  -6.780  4.00  0.00           C  
ATOM   3195  C   CNT A  94     -27.981  34.622  -5.780  0.00  0.00           C  
ATOM   3196  C   CNT A  94     -26.793  34.363  -5.120  0.00  0.00           C  
ATOM   3197  C   CNT A  94     -25.835  33.435  -5.650  8.00  0.00           C  
ATOM   3198  C   CNT A  94     -24.866  32.876  -4.750  7.00  0.00           C  
ATOM   3199  C   CNT A  94     -26.683  34.770  -3.810  2.00  0.00           C  
ATOM   3200  C   CNT A  94     -25.952  33.956  -2.910  7.00  0.00           C  
ATOM   3201  C   CNT A  94     -25.051  33.043  -3.360  9.00  0.00           C  
ATOM   3202  C   CNT A  94     -24.701  31.968  -2.520  4.00  0.00           C  
ATOM   3203  C   CNT A  94     -26.561  33.781  -1.630  3.00  0.00           C  
ATOM   3204  C   CNT A  94     -26.413  32.611  -0.910  9.00  0.00           C  
ATOM   3205  C   CNT A  94     -25.508  31.670  -1.420  0.00  0.00           C  
ATOM   3206  C   CNT A  94     -25.689  30.306  -1.090  8.00  0.00           C  
ATOM   3207  C   CNT A  94     -27.431  32.201  -0.120  5.00  0.00           C  
ATOM   3208  C   CNT A  94     -27.767  30.845  -0.090  5.00  0.00           C  
ATOM   3209  C   CNT A  94     -26.912  29.859  -0.560  5.00  0.00           C  
ATOM   3210  C   CNT A  94     -27.345  28.511  -0.620  2.00  0.00           C  
ATOM   3211  C   CNT A  94     -29.090  30.521   0.150  9.00  0.00           C  
ATOM   3212  C   CNT A  94     -29.581  29.357  -0.430  0.00  0.00           C  
ATOM   3213  C   CNT A  94     -28.758  28.360  -0.890  2.00  0.00           C  
ATOM   3214  C   CNT A  94     -29.119  27.488  -1.940  7.00  0.00           C  
ATOM   3215  C   CNT A  94     -28.333  26.440  -2.320  6.00  0.00           C  
ATOM   3216  C   CNT A  94     -28.613  25.811  -3.580  7.00  0.00           C  
ATOM   3217  C   CNT A  94     -27.678  24.848  -4.010  1.00  0.00           C  
ATOM   3218  C   CNT A  94     -27.820  24.384  -5.340  5.00  0.00           C  
ATOM   3219  C   CNT A  94     -29.503  26.416  -4.490  6.00  0.00           C  
ATOM   3220  C   CNT A  94     -29.350  26.223  -5.840  3.00  0.00           C  
ATOM   3221  C   CNT A  94     -28.540  25.170  -6.260  6.00  0.00           C  
ATOM   3222  C   CNT A  94     -27.916  25.347  -7.540  3.00  0.00           C  
ATOM   3223  C   CNT A  94     -29.714  27.258  -6.680  4.00  0.00           C  
ATOM   3224  C   CNT A  94     -28.983  27.557  -7.830  9.00  0.00           C  
ATOM   3225  C   CNT A  94     -28.038  26.620  -8.250  5.00  0.00           C  
ATOM   3226  C   CNT A  94     -26.996  27.035  -9.120  6.00  0.00           C  
ATOM   3227  C   CNT A  94     -28.764  28.937  -8.130  2.00  0.00           C  
ATOM   3228  C   CNT A  94     -27.472  29.311  -8.550  3.00  0.00           C  
ATOM   3229  C   CNT A  94     -26.617  28.379  -9.090  8.00  0.00           C  
ATOM   3230  C   CNT A  94     -25.307  28.735  -9.290  5.00  0.00           C  
ATOM   3231  C   CNT A  94     -27.073  30.635  -8.280  3.00  0.00           C  
ATOM   3232  C   CNT A  94     -25.707  30.888  -8.280  4.00  0.00           C  
ATOM   3233  C   CNT A  94     -24.775  29.891  -8.730  7.00  0.00           C  
ATOM   3234  C   CNT A  94     -23.475  29.850  -8.240  3.00  0.00           C  
ATOM   3235  C   CNT A  94     -25.223  31.851  -7.330  1.00  0.00           C  
ATOM   3236  C   CNT A  94     -24.074  31.545  -6.600  5.00  0.00           C  
ATOM   3237  C   CNT A  94     -23.194  30.538  -7.040  8.00  0.00           C  
ATOM   3238  C   CNT A  94     -22.203  30.028  -6.190  3.00  0.00           C  
ATOM   3239  C   CNT A  94     -24.005  31.894  -5.250  3.00  0.00           C  
ATOM   3240  C   CNT A  94     -23.316  31.060  -4.310  1.00  0.00           C  
ATOM   3241  C   CNT A  94     -22.389  30.104  -4.760  0.00  0.00           C  
ATOM   3242  C   CNT A  94     -22.001  29.047  -3.910  1.00  0.00           C  
ATOM   3243  C   CNT A  94     -23.790  31.052  -2.940  8.00  0.00           C  
ATOM   3244  C   CNT A  94     -23.645  29.770  -2.220  5.00  0.00           C  
ATOM   3245  C   CNT A  94     -22.779  28.805  -2.730  1.00  0.00           C  
ATOM   3246  C   CNT A  94     -22.982  27.437  -2.430  2.00  0.00           C  
ATOM   3247  C   CNT A  94     -24.823  29.331  -1.530  5.00  0.00           C  
ATOM   3248  C   CNT A  94     -25.140  27.973  -1.400  6.00  0.00           C  
ATOM   3249  C   CNT A  94     -24.199  27.035  -1.930  2.00  0.00           C  
ATOM   3250  C   CNT A  94     -24.709  25.760  -2.240  0.00  0.00           C  
ATOM   3251  C   CNT A  94     -26.507  27.591  -1.220  2.00  0.00           C  
ATOM   3252  C   CNT A  94     -27.007  26.434  -1.900  8.00  0.00           C  
ATOM   3253  C   CNT A  94     -26.112  25.536  -2.370  0.00  0.00           C  
ATOM   3254  C   CNT A  94     -26.526  24.558  -3.270  8.00  0.00           C  
ATOM   3255  C   CNT A  94     -25.672  23.591  -3.690  8.00  0.00           C  
ATOM   3256  C   CNT A  94     -25.999  22.923  -4.950  7.00  0.00           C  
ATOM   3257  C   CNT A  94     -25.033  22.031  -5.400  7.00  0.00           C  
ATOM   3258  C   CNT A  94     -25.068  21.613  -6.770  7.00  0.00           C  
ATOM   3259  C   CNT A  94     -26.963  23.425  -5.840  2.00  0.00           C  
ATOM   3260  C   CNT A  94     -26.799  23.275  -7.250  9.00  0.00           C  
ATOM   3261  C   CNT A  94     -25.808  22.394  -7.680  6.00  0.00           C  
ATOM   3262  C   CNT A  94     -25.203  22.635  -8.950  3.00  0.00           C  
ATOM   3263  C   CNT A  94     -27.095  24.381  -8.060  9.00  0.00           C  
ATOM   3264  C   CNT A  94     -26.235  24.764  -9.120  5.00  0.00           C  
ATOM   3265  C   CNT A  94     -25.337  23.842  -9.600  9.00  0.00           C  
ATOM   3266  C   CNT A  94     -24.311  24.162 -10.600  7.00  0.00           C  
ATOM   3267  C   CNT A  94     -26.049  26.074  -9.490  9.00  0.00           C  
ATOM   3268  C   CNT A  94     -24.880  26.486 -10.040  3.00  0.00           C  
ATOM   3269  C   CNT A  94     -23.957  25.545 -10.680  0.00  0.00           C  
ATOM   3270  C   CNT A  94     -22.593  25.885 -10.900  5.00  0.00           C  
ATOM   3271  C   CNT A  94     -24.399  27.755  -9.660  0.00  0.00           C  
ATOM   3272  C   CNT A  94     -23.058  27.942  -9.600  1.00  0.00           C  
ATOM   3273  C   CNT A  94     -22.152  26.980 -10.160  2.00  0.00           C  
ATOM   3274  C   CNT A  94     -20.800  26.953  -9.630  8.00  0.00           C  
ATOM   3275  C   CNT A  94     -22.611  28.889  -8.650  8.00  0.00           C  
ATOM   3276  C   CNT A  94     -21.407  28.654  -8.020  5.00  0.00           C  
ATOM   3277  C   CNT A  94     -20.494  27.656  -8.470  2.00  0.00           C  
ATOM   3278  C   CNT A  94     -19.536  27.104  -7.590  2.00  0.00           C  
ATOM   3279  C   CNT A  94     -21.273  29.079  -6.690  0.00  0.00           C  
ATOM   3280  C   CNT A  94     -20.585  28.300  -5.710  3.00  0.00           C  
ATOM   3281  C   CNT A  94     -19.732  27.271  -6.160  8.00  0.00           C  
ATOM   3282  C   CNT A  94     -19.401  26.164  -5.340  2.00  0.00           C  
ATOM   3283  C   CNT A  94     -21.095  28.130  -4.420  8.00  0.00           C  
ATOM   3284  C   CNT A  94     -21.085  26.830  -3.810  4.00  0.00           C  
ATOM   3285  C   CNT A  94     -20.243  25.822  -4.310  4.00  0.00           C  
ATOM   3286  C   CNT A  94     -20.399  24.539  -3.920  1.00  0.00           C  
ATOM   3287  C   CNT A  94     -22.114  26.463  -2.910  6.00  0.00           C  
ATOM   3288  C   CNT A  94     -22.454  25.100  -2.890  7.00  0.00           C  
ATOM   3289  C   CNT A  94     -21.597  24.104  -3.370  2.00  0.00           C  
ATOM   3290  C   CNT A  94     -22.091  22.805  -3.610  3.00  0.00           C  
ATOM   3291  C   CNT A  94     -23.809  24.819  -2.720  7.00  0.00           C  
ATOM   3292  C   CNT A  94     -24.324  23.614  -3.260  4.00  0.00           C  
ATOM   3293  C   CNT A  94     -23.456  22.612  -3.720  8.00  0.00           C  
ATOM   3294  C   CNT A  94     -23.856  21.653  -4.670  5.00  0.00           C  
ATOM   3295  C   CNT A  94     -22.885  20.754  -5.200  8.00  0.00           C  
ATOM   3296  C   CNT A  94     -23.142  20.136  -6.400  8.00  0.00           C  
ATOM   3297  C   CNT A  94     -22.296  19.087  -6.850  8.00  0.00           C  
ATOM   3298  C   CNT A  94     -22.392  18.757  -8.240  8.00  0.00           C  
ATOM   3299  C   CNT A  94     -24.141  20.636  -7.250  4.00  0.00           C  
ATOM   3300  C   CNT A  94     -23.878  20.594  -8.650  0.00  0.00           C  
ATOM   3301  C   CNT A  94     -23.077  19.568  -9.150  8.00  0.00           C  
ATOM   3302  C   CNT A  94     -22.529  19.670 -10.480  0.00  0.00           C  
ATOM   3303  C   CNT A  94     -24.342  21.653  -9.440  2.00  0.00           C  
ATOM   3304  C   CNT A  94     -23.727  21.833 -10.740  5.00  0.00           C  
ATOM   3305  C   CNT A  94     -22.795  20.873 -11.200  1.00  0.00           C  
ATOM   3306  C   CNT A  94     -21.746  21.238 -12.070  6.00  0.00           C  
ATOM   3307  C   CNT A  94     -23.468  23.181 -11.050  8.00  0.00           C  
ATOM   3308  C   CNT A  94     -22.248  23.586 -11.620  9.00  0.00           C  
ATOM   3309  C   CNT A  94     -21.404  22.593 -12.180  4.00  0.00           C  
ATOM   3310  C   CNT A  94     -19.990  22.912 -12.290  0.00  0.00           C  
ATOM   3311  C   CNT A  94     -21.731  24.849 -11.320  7.00  0.00           C  
ATOM   3312  C   CNT A  94     -20.348  24.980 -11.050  4.00  0.00           C  
ATOM   3313  C   CNT A  94     -19.463  24.035 -11.600  8.00  0.00           C  
ATOM   3314  C   CNT A  94     -18.184  24.009 -11.050  1.00  0.00           C  
ATOM   3315  C   CNT A  94     -19.931  25.889 -10.080  1.00  0.00           C  
ATOM   3316  C   CNT A  94     -18.761  25.651  -9.360  4.00  0.00           C  
ATOM   3317  C   CNT A  94     -17.979  24.644  -9.790  1.00  0.00           C  
ATOM   3318  C   CNT A  94     -17.000  24.029  -8.950  6.00  0.00           C  
ATOM   3319  C   CNT A  94     -18.631  26.112  -8.070  6.00  0.00           C  
ATOM   3320  C   CNT A  94     -17.989  25.298  -7.150  6.00  0.00           C  
ATOM   3321  C   CNT A  94     -17.102  24.277  -7.580  0.00  0.00           C  
ATOM   3322  C   CNT A  94     -16.733  23.190  -6.690  2.00  0.00           C  
ATOM   3323  C   CNT A  94     -18.424  25.220  -5.800  8.00  0.00           C  
ATOM   3324  C   CNT A  94     -18.421  23.973  -5.150  3.00  0.00           C  
ATOM   3325  C   CNT A  94     -17.570  22.969  -5.620  2.00  0.00           C  
ATOM   3326  C   CNT A  94     -17.673  21.618  -5.220  6.00  0.00           C  
ATOM   3327  C   CNT A  94     -19.443  23.594  -4.230  9.00  0.00           C  
ATOM   3328  C   CNT A  94     -19.792  22.192  -4.150  2.00  0.00           C  
ATOM   3329  C   CNT A  94     -18.881  21.222  -4.590  3.00  0.00           C  
ATOM   3330  C   CNT A  94     -19.327  19.886  -4.940  3.00  0.00           C  
ATOM   3331  C   CNT A  94     -21.129  21.802  -3.920  1.00  0.00           C  
ATOM   3332  C   CNT A  94     -21.626  20.659  -4.610  8.00  0.00           C  
ATOM   3333  C   CNT A  94     -20.706  19.660  -5.110  4.00  0.00           C  
ATOM   3334  C   CNT A  94     -21.126  18.808  -6.150  9.00  0.00           C  
ATOM   3335  C   CNT A  94     -20.249  17.793  -6.630  2.00  0.00           C  
ATOM   3336  C   CNT A  94     -20.469  17.248  -7.910  5.00  0.00           C  
ATOM   3337  C   CNT A  94     -19.638  16.221  -8.350  7.00  0.00           C  
ATOM   3338  C   CNT A  94     -19.728  15.887  -9.780  1.00  0.00           C  
ATOM   3339  C   CNT A  94     -21.417  17.837  -8.770  5.00  0.00           C  
ATOM   3340  C   CNT A  94     -21.372  17.584 -10.170  9.00  0.00           C  
ATOM   3341  C   CNT A  94     -20.515  16.619 -10.660  6.00  0.00           C  
ATOM   3342  C   CNT A  94     -20.035  16.747 -12.040  3.00  0.00           C  
ATOM   3343  C   CNT A  94     -21.826  18.645 -11.040  5.00  0.00           C  
ATOM   3344  C   CNT A  94     -21.035  18.900 -12.160  6.00  0.00           C  
ATOM   3345  C   CNT A  94     -20.179  17.995 -12.680  9.00  0.00           C  
ATOM   3346  C   CNT A  94     -19.072  18.364 -13.490  0.00  0.00           C  
ATOM   3347  C   CNT A  94     -20.789  20.278 -12.510  9.00  0.00           C  
ATOM   3348  C   CNT A  94     -19.536  20.699 -12.980  0.00  0.00           C  
ATOM   3349  C   CNT A  94     -18.673  19.747 -13.530  3.00  0.00           C  
ATOM   3350  C   CNT A  94     -17.303  20.058 -13.640  1.00  0.00           C  
ATOM   3351  C   CNT A  94     -19.086  22.014 -12.770  2.00  0.00           C  
ATOM   3352  C   CNT A  94     -17.697  22.139 -12.530  0.00  0.00           C  
ATOM   3353  C   CNT A  94     -16.851  21.140 -12.970  6.00  0.00           C  
ATOM   3354  C   CNT A  94     -15.537  21.112 -12.450  4.00  0.00           C  
ATOM   3355  C   CNT A  94     -17.298  23.001 -11.490  0.00  0.00           C  
ATOM   3356  C   CNT A  94     -16.127  22.725 -10.790  9.00  0.00           C  
ATOM   3357  C   CNT A  94     -15.269  21.697 -11.200  3.00  0.00           C  
ATOM   3358  C   CNT A  94     -14.285  21.250 -10.390  1.00  0.00           C  
ATOM   3359  C   CNT A  94     -16.101  23.045  -9.390  7.00  0.00           C  
ATOM   3360  C   CNT A  94     -15.423  22.285  -8.500  8.00  0.00           C  
ATOM   3361  C   CNT A  94     -14.571  21.303  -9.040  2.00  0.00           C  
ATOM   3362  C   CNT A  94     -14.125  20.289  -8.170  1.00  0.00           C  
ATOM   3363  C   CNT A  94     -15.916  22.192  -7.230  3.00  0.00           C  
ATOM   3364  C   CNT A  94     -15.819  20.957  -6.610  2.00  0.00           C  
ATOM   3365  C   CNT A  94     -14.912  20.003  -7.050  3.00  0.00           C  
ATOM   3366  C   CNT A  94     -15.008  18.709  -6.620  8.00  0.00           C  
ATOM   3367  C   CNT A  94     -16.762  20.618  -5.580  8.00  0.00           C  
ATOM   3368  C   CNT A  94     -17.075  19.267  -5.500  6.00  0.00           C  
ATOM   3369  C   CNT A  94     -16.176  18.242  -6.010  3.00  0.00           C  
ATOM   3370  C   CNT A  94     -16.640  16.980  -6.430  5.00  0.00           C  
ATOM   3371  C   CNT A  94     -18.424  18.956  -5.450  4.00  0.00           C  
ATOM   3372  C   CNT A  94     -18.904  17.781  -6.080  8.00  0.00           C  
ATOM   3373  C   CNT A  94     -17.997  16.874  -6.650  1.00  0.00           C  
ATOM   3374  C   CNT A  94     -18.383  16.038  -7.730  8.00  0.00           C  
ATOM   3375  C   CNT A  94     -17.572  15.003  -8.140  5.00  0.00           C  
ATOM   3376  C   CNT A  94     -17.872  14.392  -9.370  9.00  0.00           C  
ATOM   3377  C   CNT A  94     -16.993  13.399  -9.850  9.00  0.00           C  
ATOM   3378  C   CNT A  94     -17.045  13.016 -11.210  9.00  0.00           C  
ATOM   3379  C   CNT A  94     -18.753  14.976 -10.270  9.00  0.00           C  
ATOM   3380  C   CNT A  94     -18.577  14.900 -11.660  2.00  0.00           C  
ATOM   3381  C   CNT A  94     -17.765  13.866 -12.150  4.00  0.00           C  
ATOM   3382  C   CNT A  94     -17.351  13.917 -13.510  3.00  0.00           C  
ATOM   3383  C   CNT A  94     -19.169  15.755 -12.540  0.00  0.00           C  
ATOM   3384  C   CNT A  94     -18.365  16.073 -13.660  2.00  0.00           C  
ATOM   3385  C   CNT A  94     -17.503  15.132 -14.240  3.00  0.00           C  
ATOM   3386  C   CNT A  94     -16.344  15.491 -14.930  8.00  0.00           C  
ATOM   3387  C   CNT A  94     -18.159  17.415 -13.930  5.00  0.00           C  
ATOM   3388  C   CNT A  94     -16.865  17.784 -14.310  9.00  0.00           C  
ATOM   3389  C   CNT A  94     -15.993  16.833 -14.970  1.00  0.00           C  
ATOM   3390  C   CNT A  94     -14.670  17.244 -15.150  0.00  0.00           C  
ATOM   3391  C   CNT A  94     -16.442  19.074 -14.090  2.00  0.00           C  
ATOM   3392  C   CNT A  94     -15.045  19.240 -13.870  7.00  0.00           C  
ATOM   3393  C   CNT A  94     -14.227  18.249 -14.270  8.00  0.00           C  
ATOM   3394  C   CNT A  94     -12.818  18.312 -13.960  3.00  0.00           C  
ATOM   3395  C   CNT A  94     -14.631  20.186 -12.890  9.00  0.00           C  
ATOM   3396  C   CNT A  94     -13.377  20.006 -12.230  4.00  0.00           C  
ATOM   3397  C   CNT A  94     -12.461  19.056 -12.770  1.00  0.00           C  
ATOM   3398  C   CNT A  94     -11.603  18.447 -11.870  2.00  0.00           C  
ATOM   3399  C   CNT A  94     -13.351  20.348 -10.860  0.00  0.00           C  
ATOM   3400  C   CNT A  94     -12.656  19.530  -9.940  6.00  0.00           C  
ATOM   3401  C   CNT A  94     -11.804  18.532 -10.430  1.00  0.00           C  
ATOM   3402  C   CNT A  94     -11.394  17.506  -9.630  3.00  0.00           C  
ATOM   3403  C   CNT A  94     -13.211  19.346  -8.680  4.00  0.00           C  
ATOM   3404  C   CNT A  94     -13.045  18.176  -8.010  1.00  0.00           C  
ATOM   3405  C   CNT A  94     -12.198  17.232  -8.500  6.00  0.00           C  
ATOM   3406  C   CNT A  94     -12.325  15.855  -8.090  8.00  0.00           C  
ATOM   3407  C   CNT A  94     -14.085  17.743  -7.100  1.00  0.00           C  
ATOM   3408  C   CNT A  94     -14.401  16.399  -7.040  2.00  0.00           C  
ATOM   3409  C   CNT A  94     -13.565  15.428  -7.600  0.00  0.00           C  
ATOM   3410  C   CNT A  94     -14.020  14.142  -7.910  0.00  0.00           C  
ATOM   3411  C   CNT A  94     -15.781  16.018  -6.890  2.00  0.00           C  
ATOM   3412  C   CNT A  94     -16.291  14.941  -7.650  7.00  0.00           C  
ATOM   3413  C   CNT A  94     -15.383  13.970  -8.150  8.00  0.00           C  
ATOM   3414  C   CNT A  94     -15.858  13.076  -9.120  3.00  0.00           C  
ATOM   3415  C   CNT A  94     -14.986  12.082  -9.640  4.00  0.00           C  
ATOM   3416  C   CNT A  94     -15.231  11.392 -10.830  8.00  0.00           C  
ATOM   3417  C   CNT A  94     -14.360  10.440 -11.340  1.00  0.00           C  
ATOM   3418  C   CNT A  94     -14.407  10.106 -12.690  2.00  0.00           C  
ATOM   3419  C   CNT A  94     -16.198  11.976 -11.680  8.00  0.00           C  
ATOM   3420  C   CNT A  94     -16.019  11.837 -13.030  9.00  0.00           C  
ATOM   3421  C   CNT A  94     -15.089  10.947 -13.550  7.00  0.00           C  
ATOM   3422  C   CNT A  94     -14.654  10.966 -14.880  5.00  0.00           C  
ATOM   3423  C   CNT A  94     -16.400  12.942 -13.910  4.00  0.00           C  
ATOM   3424  C   CNT A  94     -15.535  13.206 -15.000  3.00  0.00           C  
ATOM   3425  C   CNT A  94     -14.675  12.233 -15.480  6.00  0.00           C  
ATOM   3426  C   CNT A  94     -13.601  12.644 -16.290  0.00  0.00           C  
ATOM   3427  C   CNT A  94     -15.370  14.589 -15.390  5.00  0.00           C  
ATOM   3428  C   CNT A  94     -14.134  14.979 -15.850  2.00  0.00           C  
ATOM   3429  C   CNT A  94     -13.330  14.037 -16.360  4.00  0.00           C  
ATOM   3430  C   CNT A  94     -11.958  14.343 -16.620  4.00  0.00           C  
ATOM   3431  C   CNT A  94     -13.700  16.273 -15.620  0.00  0.00           C  
ATOM   3432  C   CNT A  94     -12.328  16.503 -15.450  1.00  0.00           C  
ATOM   3433  C   CNT A  94     -11.474  15.482 -15.880  9.00  0.00           C  
ATOM   3434  C   CNT A  94     -10.151  15.438 -15.380  6.00  0.00           C  
ATOM   3435  C   CNT A  94     -11.943  17.305 -14.370  6.00  0.00           C  
ATOM   3436  C   CNT A  94     -10.793  17.009 -13.580  9.00  0.00           C  
ATOM   3437  C   CNT A  94      -9.919  16.037 -14.080  5.00  0.00           C  
ATOM   3438  C   CNT A  94      -8.960  15.486 -13.210  1.00  0.00           C  
ATOM   3439  C   CNT A  94     -10.684  17.557 -12.290  9.00  0.00           C  
ATOM   3440  C   CNT A  94      -9.992  16.722 -11.370  7.00  0.00           C  
ATOM   3441  C   CNT A  94      -9.058  15.689 -11.810  0.00  0.00           C  
ATOM   3442  C   CNT A  94      -8.568  14.707 -10.940  0.00  0.00           C  
ATOM   3443  C   CNT A  94     -10.565  16.520 -10.110  3.00  0.00           C  
ATOM   3444  C   CNT A  94     -10.361  15.305  -9.420  1.00  0.00           C  
ATOM   3445  C   CNT A  94      -9.394  14.380  -9.890  0.00  0.00           C  
ATOM   3446  C   CNT A  94      -9.550  13.032  -9.500  1.00  0.00           C  
ATOM   3447  C   CNT A  94     -11.477  14.916  -8.710  1.00  0.00           C  
ATOM   3448  C   CNT A  94     -11.720  13.537  -8.630  7.00  0.00           C  
ATOM   3449  C   CNT A  94     -10.802  12.598  -9.060  6.00  0.00           C  
ATOM   3450  C   CNT A  94     -11.358  11.326  -9.430  1.00  0.00           C  
ATOM   3451  C   CNT A  94     -13.110  13.212  -8.400  9.00  0.00           C  
ATOM   3452  C   CNT A  94     -13.611  12.114  -9.210  9.00  0.00           C  
ATOM   3453  C   CNT A  94     -12.756  11.125  -9.680  5.00  0.00           C  
ATOM   3454  C   CNT A  94     -13.174  10.168 -10.590  9.00  0.00           C  
ATOM   3455  C   CNT A  94     -12.300   9.257 -11.110  1.00  0.00           C  
ATOM   3456  C   CNT A  94     -12.603   8.505 -12.250  2.00  0.00           C  
ATOM   3457  C   CNT A  94     -11.721   7.613 -12.740  9.00  0.00           C  
ATOM   3458  C   CNT A  94     -11.830   7.151 -14.050  7.00  0.00           C  
ATOM   3459  C   CNT A  94     -13.524   9.072 -13.160  0.00  0.00           C  
ATOM   3460  C   CNT A  94     -13.369   8.956 -14.580  7.00  0.00           C  
ATOM   3461  C   CNT A  94     -12.519   7.951 -15.030  2.00  0.00           C  
ATOM   3462  C   CNT A  94     -11.981   8.146 -16.320  3.00  0.00           C  
ATOM   3463  C   CNT A  94     -13.759  10.030 -15.430  1.00  0.00           C  
ATOM   3464  C   CNT A  94     -12.921  10.350 -16.510  6.00  0.00           C  
ATOM   3465  C   CNT A  94     -12.030   9.378 -16.950  5.00  0.00           C  
ATOM   3466  C   CNT A  94     -11.003   9.762 -17.790  3.00  0.00           C  
ATOM   3467  C   CNT A  94     -12.707  11.731 -16.810  1.00  0.00           C  
ATOM   3468  C   CNT A  94     -11.496  12.091 -17.340  3.00  0.00           C  
ATOM   3469  C   CNT A  94     -10.655  11.090 -17.830  3.00  0.00           C  
ATOM   3470  C   CNT A  94      -9.250  11.393 -17.880  7.00  0.00           C  
ATOM   3471  C   CNT A  94     -11.009  13.375 -17.060  9.00  0.00           C  
ATOM   3472  C   CNT A  94      -9.622  13.523 -16.810  2.00  0.00           C  
ATOM   3473  C   CNT A  94      -8.800  12.453 -17.120  9.00  0.00           C  
ATOM   3474  C   CNT A  94      -7.427  12.485 -16.710  5.00  0.00           C  
ATOM   3475  C   CNT A  94      -9.227  14.489 -15.800  9.00  0.00           C  
ATOM   3476  C   CNT A  94      -8.094  14.121 -15.020  8.00  0.00           C  
ATOM   3477  C   CNT A  94      -7.143  13.177 -15.520  9.00  0.00           C  
ATOM   3478  C   CNT A  94      -6.223  12.563 -14.640  4.00  0.00           C  
ATOM   3479  C   CNT A  94      -8.026  14.526 -13.710  7.00  0.00           C  
ATOM   3480  C   CNT A  94      -7.287  13.706 -12.820  3.00  0.00           C  
ATOM   3481  C   CNT A  94      -6.486  12.613 -13.280  5.00  0.00           C  
ATOM   3482  C   CNT A  94      -5.941  11.689 -12.380  0.00  0.00           C  
ATOM   3483  C   CNT A  94      -7.701  13.630 -11.460  9.00  0.00           C  
ATOM   3484  C   CNT A  94      -7.642  12.384 -10.830  6.00  0.00           C  
ATOM   3485  C   CNT A  94      -6.704  11.373 -11.240  5.00  0.00           C  
ATOM   3486  C   CNT A  94      -6.902  10.014 -10.910  5.00  0.00           C  
ATOM   3487  C   CNT A  94      -8.706  12.009 -10.000  1.00  0.00           C  
ATOM   3488  C   CNT A  94      -9.089  10.696 -10.060  8.00  0.00           C  
ATOM   3489  C   CNT A  94      -8.248   9.654 -10.480  4.00  0.00           C  
ATOM   3490  C   CNT A  94      -8.719   8.393 -10.850  6.00  0.00           C  
ATOM   3491  C   CNT A  94     -10.440  10.439 -10.020  0.00  0.00           C  
ATOM   3492  C   CNT A  94     -10.992   9.203 -10.490  5.00  0.00           C  
ATOM   3493  C   CNT A  94     -10.086   8.163 -10.980  1.00  0.00           C  
ATOM   3494  C   CNT A  94     -10.552   7.272 -12.010  4.00  0.00           C  
ATOM   3495  C   CNT A  94      -9.626   6.283 -12.530  5.00  0.00           C  
ATOM   3496  C   CNT A  94      -9.953   5.633 -13.720  6.00  0.00           C  
ATOM   3497  C   CNT A  94      -8.987   4.747 -14.260  4.00  0.00           C  
ATOM   3498  C   CNT A  94      -9.100   4.302 -15.560  1.00  0.00           C  
ATOM   3499  C   CNT A  94     -10.920   6.216 -14.600  2.00  0.00           C  
ATOM   3500  C   CNT A  94     -10.690   6.076 -15.980  1.00  0.00           C  
ATOM   3501  C   CNT A  94      -9.873   5.086 -16.490  6.00  0.00           C  
ATOM   3502  C   CNT A  94      -9.344   5.255 -17.770  2.00  0.00           C  
ATOM   3503  C   CNT A  94     -11.171   7.128 -16.810  5.00  0.00           C  
ATOM   3504  C   CNT A  94     -10.382   7.432 -17.900  3.00  0.00           C  
ATOM   3505  C   CNT A  94      -9.486   6.473 -18.430  3.00  0.00           C  
ATOM   3506  C   CNT A  94      -8.456   6.865 -19.370  5.00  0.00           C  
ATOM   3507  C   CNT A  94     -10.135   8.781 -18.220  1.00  0.00           C  
ATOM   3508  C   CNT A  94      -8.904   9.154 -18.760  9.00  0.00           C  
ATOM   3509  C   CNT A  94      -8.052   8.251 -19.410  2.00  0.00           C  
ATOM   3510  C   CNT A  94      -6.696   8.483 -19.450  4.00  0.00           C  
ATOM   3511  C   CNT A  94      -8.397  10.375 -18.360  1.00  0.00           C  
ATOM   3512  C   CNT A  94      -7.040  10.529 -18.110  2.00  0.00           C  
ATOM   3513  C   CNT A  94      -6.180   9.521 -18.700  0.00  0.00           C  
ATOM   3514  C   CNT A  94      -4.875   9.548 -18.190  3.00  0.00           C  
ATOM   3515  C   CNT A  94      -6.584  11.466 -17.150  7.00  0.00           C  
ATOM   3516  C   CNT A  94      -5.426  11.176 -16.460  7.00  0.00           C  
ATOM   3517  C   CNT A  94      -4.576  10.149 -16.950  6.00  0.00           C  
ATOM   3518  C   CNT A  94      -3.595   9.635 -16.070  9.00  0.00           C  
ATOM   3519  C   CNT A  94      -5.420  11.526 -15.160  5.00  0.00           C  
ATOM   3520  C   CNT A  94      -4.728  10.740 -14.230  6.00  0.00           C  
ATOM   3521  C   CNT A  94      -3.834   9.721 -14.660  5.00  0.00           C  
ATOM   3522  C   CNT A  94      -3.445   8.669 -13.920  3.00  0.00           C  
ATOM   3523  C   CNT A  94      -5.075  10.681 -12.850  7.00  0.00           C  
ATOM   3524  C   CNT A  94      -5.018   9.393 -12.220  1.00  0.00           C  
ATOM   3525  C   CNT A  94      -4.174   8.401 -12.740  9.00  0.00           C  
ATOM   3526  C   CNT A  94      -4.269   7.054 -12.290  2.00  0.00           C  
ATOM   3527  C   CNT A  94      -6.094   9.031 -11.360  5.00  0.00           C  
ATOM   3528  C   CNT A  94      -6.468   7.668 -11.290  9.00  0.00           C  
ATOM   3529  C   CNT A  94      -5.534   6.659 -11.770  1.00  0.00           C  
ATOM   3530  C   CNT A  94      -6.023   5.339 -12.250  2.00  0.00           C  
ATOM   3531  C   CNT A  94      -7.853   7.336 -11.310  5.00  0.00           C  
ATOM   3532  C   CNT A  94      -8.290   6.198 -11.960  6.00  0.00           C  
ATOM   3533  C   CNT A  94      -7.425   5.242 -12.410  1.00  0.00           C  
ATOM   3534  C   CNT A  94      -7.878   4.451 -13.480  7.00  0.00           C  
ATOM   3535  C   CNT A  94      -6.920   3.530 -13.960  9.00  0.00           C  
ATOM   3536  C   CNT A  94      -7.287   2.802 -15.160  2.00  0.00           C  
ATOM   3537  C   CNT A  94      -6.473   1.710 -15.610  6.00  0.00           C  
ATOM   3538  C   CNT A  94      -6.763   1.302 -16.940  7.00  0.00           C  
ATOM   3539  C   CNT A  94      -8.200   3.365 -16.060  7.00  0.00           C  
ATOM   3540  C   CNT A  94      -8.048   3.195 -17.430  4.00  0.00           C  
ATOM   3541  C   CNT A  94      -7.243   2.196 -17.990  3.00  0.00           C  
ATOM   3542  C   CNT A  94      -7.039   2.258 -19.440  4.00  0.00           C  
ATOM   3543  C   CNT A  94      -8.550   4.239 -18.270  8.00  0.00           C  
ATOM   3544  C   CNT A  94      -7.813   4.526 -19.510  1.00  0.00           C  
ATOM   3545  C   CNT A  94      -6.977   3.543 -20.010  9.00  0.00           C  
ATOM   3546  C   CNT A  94      -6.014   4.016 -20.880  3.00  0.00           C  
ATOM   3547  C   CNT A  94      -7.615   5.882 -19.820  1.00  0.00           C  
ATOM   3548  C   CNT A  94      -6.323   6.278 -20.240  1.00  0.00           C  
ATOM   3549  C   CNT A  94      -5.506   5.284 -20.760  5.00  0.00           C  
ATOM   3550  C   CNT A  94      -4.129   5.661 -20.930  3.00  0.00           C  
ATOM   3551  C   CNT A  94      -5.805   7.503 -19.870  8.00  0.00           C  
ATOM   3552  C   CNT A  94      -4.446   7.640 -19.620  5.00  0.00           C  
ATOM   3553  C   CNT A  94      -3.540   6.708 -20.170  4.00  0.00           C  
ATOM   3554  C   CNT A  94      -2.207   6.837 -19.730  4.00  0.00           C  
ATOM   3555  C   CNT A  94      -3.995   8.584 -18.710  7.00  0.00           C  
ATOM   3556  C   CNT A  94      -2.829   8.319 -17.930  2.00  0.00           C  
ATOM   3557  C   CNT A  94      -1.873   7.395 -18.480  4.00  0.00           C  
ATOM   3558  C   CNT A  94      -0.863   7.083 -17.550  3.00  0.00           C  
ATOM   3559  C   CNT A  94      -2.704   8.682 -16.590  5.00  0.00           C  
ATOM   3560  C   CNT A  94      -1.951   7.900 -15.670  6.00  0.00           C  
ATOM   3561  C   CNT A  94      -0.928   7.051 -16.140  6.00  0.00           C  
ATOM   3562  C   CNT A  94      -0.544   6.134 -15.160  0.00  0.00           C  
ATOM   3563  C   CNT A  94      -2.548   7.702 -14.360  7.00  0.00           C  
ATOM   3564  C   CNT A  94      -2.370   6.459 -13.740  2.00  0.00           C  
ATOM   3565  C   CNT A  94      -1.384   5.550 -14.180  7.00  0.00           C  
ATOM   3566  C   CNT A  94      -1.481   4.296 -13.580  9.00  0.00           C  
ATOM   3567  C   CNT A  94      -3.442   6.054 -12.900  9.00  0.00           C  
ATOM   3568  C   CNT A  94      -3.776   4.738 -12.770  7.00  0.00           C  
ATOM   3569  C   CNT A  94      -2.800   3.745 -13.300  1.00  0.00           C  
ATOM   3570  C   CNT A  94      -3.371   2.580 -13.740  2.00  0.00           C  
ATOM   3571  C   CNT A  94      -5.111   4.417 -12.740  4.00  0.00           C  
ATOM   3572  C   CNT A  94      -5.609   3.346 -13.510  7.00  0.00           C  
ATOM   3573  C   CNT A  94      -4.734   2.420 -14.090  2.00  0.00           C  
ATOM   3574  C   CNT A  94      -5.354   1.393 -14.830  9.00  0.00           C  
ATOM   3575  N   LIG A  95     -56.241  51.699   7.890  7.00  0.00           N  
ATOM   3576  N   LIG A  95     -47.260  59.234  10.220  8.00  0.00           N  
ATOM   3577  N   LIG A  95      -6.733   1.364 -21.590  5.00  0.00           N  
ATOM   3578  N   LIG A  95      -0.716   2.668 -12.230  8.00  0.00           N  
ATOM   3579  C   LIG A  95     -55.615  51.434   9.090  4.00  0.00           C  
ATOM   3580  C   LIG A  95     -48.059  58.292  10.860  3.00  0.00           C  
ATOM   3581  C   LIG A  95      -6.770   0.988 -20.230  2.00  0.00           C  
ATOM   3582  C   LIG A  95      -0.170   3.663 -13.010  1.00  0.00           C  
ATOM   3583  O   LIG A  95     -55.619  51.132  10.260  2.00  0.00           O  
ATOM   3584  O   LIG A  95     -48.821  57.898  11.660  9.00  0.00           O  
ATOM   3585  O   LIG A  95      -6.662   0.149 -19.400  8.00  0.00           O  
ATOM   3586  O   LIG A  95       0.713   4.257 -13.470  4.00  0.00           O  
ATOM   3587  C1  LIG A  95     -57.648  51.269   7.720  9.00  0.00           C  
ATOM   3588  C1  LIG A  95     -47.480  60.636  10.720  5.00  0.00           C  
ATOM   3589  C1  LIG A  95      -7.258   0.404 -22.550  1.00  0.00           C  
ATOM   3590  C1  LIG A  95       0.115   2.139 -11.160  3.00  0.00           C  
ATOM   3591  N1  LIG A  95     -57.122  49.930   5.780  6.00  0.00           N  
ATOM   3592  N1  LIG A  95     -47.421  61.683   8.380  4.00  0.00           N  
ATOM   3593  N1  LIG A  95      -9.580   0.375 -21.480  1.00  0.00           N  
ATOM   3594  N1  LIG A  95      -0.454   4.086  -9.650  3.00  0.00           N  
ATOM   3595  O1  LIG A  95     -53.501  49.288   2.970  6.00  0.00           O  
ATOM   3596  O1  LIG A  95     -48.203  60.486   3.940  3.00  0.00           O  
ATOM   3597  O1  LIG A  95     -12.593   1.144 -18.200  0.00  0.00           O  
ATOM   3598  O1  LIG A  95      -3.503   7.483  -9.210  5.00  0.00           O  
ATOM   3599  C2  LIG A  95     -57.936  49.930   7.020  6.00  0.00           C  
ATOM   3600  C2  LIG A  95     -46.845  61.684   9.720  4.00  0.00           C  
ATOM   3601  C2  LIG A  95      -8.802   0.483 -22.800  3.00  0.00           C  
ATOM   3602  C2  LIG A  95       0.584   3.321 -10.240  9.00  0.00           C  
ATOM   3603  N2  LIG A  95     -56.176  50.655   3.840  9.00  0.00           N  
ATOM   3604  N2  LIG A  95     -49.002  61.785   6.670  3.00  0.00           N  
ATOM   3605  N2  LIG A  95     -11.000  -0.632 -20.020  0.00  0.00           N  
ATOM   3606  N2  LIG A  95      -2.414   4.674  -8.820  9.00  0.00           N  
ATOM   3607  C3  LIG A  95     -57.207  50.762   4.690  3.00  0.00           C  
ATOM   3608  C3  LIG A  95     -48.773  62.040   7.970  2.00  0.00           C  
ATOM   3609  C3  LIG A  95     -10.159  -0.815 -21.110  9.00  0.00           C  
ATOM   3610  C3  LIG A  95      -1.588   3.650  -8.970  6.00  0.00           C  
ATOM   3611  N3  LIG A  95     -55.465  48.184   6.310  9.00  0.00           N  
ATOM   3612  N3  LIG A  95     -45.604  60.542   7.040  8.00  0.00           N  
ATOM   3613  N3  LIG A  95     -10.167   2.726 -20.980  9.00  0.00           N  
ATOM   3614  N3  LIG A  95       0.085   6.333 -10.620  2.00  0.00           N  
ATOM   3615  C4  LIG A  95     -55.446  49.630   4.360  6.00  0.00           C  
ATOM   3616  C4  LIG A  95     -47.795  61.137   6.260  2.00  0.00           C  
ATOM   3617  C4  LIG A  95     -11.054   0.763 -19.910  5.00  0.00           C  
ATOM   3618  C4  LIG A  95      -1.932   5.796  -9.450  4.00  0.00           C  
ATOM   3619  N4  LIG A  95     -53.793  47.970   4.620  5.00  0.00           N  
ATOM   3620  N4  LIG A  95     -46.402  59.914   4.890  5.00  0.00           N  
ATOM   3621  N4  LIG A  95     -11.798   2.883 -19.150  5.00  0.00           N  
ATOM   3622  N4  LIG A  95      -1.720   7.861 -10.440  6.00  0.00           N  
ATOM   3623  C5  LIG A  95     -55.993  49.211   5.550  7.00  0.00           C  
ATOM   3624  C5  LIG A  95     -46.837  61.198   7.210  1.00  0.00           C  
ATOM   3625  C5  LIG A  95     -10.285   1.335 -20.830  2.00  0.00           C  
ATOM   3626  C5  LIG A  95      -0.693   5.448  -9.940  9.00  0.00           C  
ATOM   3627  N5  LIG A  95     -53.912  46.566   6.360  1.00  0.00           N  
ATOM   3628  N5  LIG A  95     -44.398  59.363   5.530  3.00  0.00           N  
ATOM   3629  N5  LIG A  95     -10.943   4.685 -20.240  1.00  0.00           N  
ATOM   3630  N5  LIG A  95       0.243   8.406 -11.370  9.00  0.00           N  
ATOM   3631  C6  LIG A  95     -54.218  48.954   3.930  3.00  0.00           C  
ATOM   3632  C6  LIG A  95     -47.548  60.529   4.960  5.00  0.00           C  
ATOM   3633  C6  LIG A  95     -11.873   1.579 -19.040  9.00  0.00           C  
ATOM   3634  C6  LIG A  95      -2.454   7.107  -9.670  1.00  0.00           C  
ATOM   3635  C7  LIG A  95     -54.343  47.623   5.790  5.00  0.00           C  
ATOM   3636  C7  LIG A  95     -45.504  59.991   5.840  8.00  0.00           C  
ATOM   3637  C7  LIG A  95     -10.965   3.363 -20.100  8.00  0.00           C  
ATOM   3638  C7  LIG A  95      -0.510   7.466 -10.870  8.00  0.00           C  
ATOM   3639  H   LIG A  95     -55.774  51.633   7.020  6.00  0.00           H  
ATOM   3640  H   LIG A  95     -46.384  58.975   9.740  1.00  0.00           H  
ATOM   3641  H   LIG A  95      -6.890   2.333 -21.750  9.00  0.00           H  
ATOM   3642  H   LIG A  95      -1.670   2.998 -11.930  9.00  0.00           H  
ATOM   3643  H1  LIG A  95     -58.269  52.020   7.110  5.00  0.00           H  
ATOM   3644  H1  LIG A  95     -46.943  60.774  11.680  8.00  0.00           H  
ATOM   3645  H1  LIG A  95      -6.999  -0.586 -22.230  0.00  0.00           H  
ATOM   3646  H1  LIG A  95       1.032   1.716 -11.600  9.00  0.00           H  
ATOM   3647  H2  LIG A  95     -58.187  51.225   8.690  5.00  0.00           H  
ATOM   3648  H2  LIG A  95     -48.571  60.817  10.900  9.00  0.00           H  
ATOM   3649  H2  LIG A  95      -6.857   0.531 -23.600  4.00  0.00           H  
ATOM   3650  H2  LIG A  95      -0.416   1.410 -10.610  7.00  0.00           H  
ATOM   3651  H3  LIG A  95     -59.051  49.911   6.760  1.00  0.00           H  
ATOM   3652  H3  LIG A  95     -45.772  61.353   9.770  8.00  0.00           H  
ATOM   3653  H3  LIG A  95      -8.887  -0.392 -23.420  7.00  0.00           H  
ATOM   3654  H3  LIG A  95       1.203   3.982 -10.780  5.00  0.00           H  
ATOM   3655  H4  LIG A  95     -57.662  49.130   7.680  9.00  0.00           H  
ATOM   3656  H4  LIG A  95     -46.954  62.691  10.070  6.00  0.00           H  
ATOM   3657  H4  LIG A  95      -9.090   1.369 -23.320  4.00  0.00           H  
ATOM   3658  H4  LIG A  95       1.119   2.864  -9.370  0.00  0.00           H  
ATOM   3659  H5  LIG A  95     -58.002  51.466   4.500  2.00  0.00           H  
ATOM   3660  H5  LIG A  95     -49.406  62.564   8.600  5.00  0.00           H  
ATOM   3661  H5  LIG A  95     -10.149  -1.782 -21.640  2.00  0.00           H  
ATOM   3662  H5  LIG A  95      -1.682   2.663  -8.560  9.00  0.00           H  
ATOM   3663  H6  LIG A  95     -53.172  47.353   4.090  2.00  0.00           H  
ATOM   3664  H6  LIG A  95     -46.092  59.543   3.970  0.00  0.00           H  
ATOM   3665  H6  LIG A  95     -12.442   3.488 -18.640  7.00  0.00           H  
ATOM   3666  H6  LIG A  95      -1.948   8.880 -10.450  1.00  0.00           H  
ATOM   3667  H7  LIG A  95     -53.028  46.220   6.090  0.00  0.00           H  
ATOM   3668  H7  LIG A  95     -44.344  58.931   4.630  4.00  0.00           H  
ATOM   3669  H7  LIG A  95     -10.849   5.103 -21.150  6.00  0.00           H  
ATOM   3670  H7  LIG A  95       0.063   9.340 -11.090  2.00  0.00           H  
ATOM   3671  H8  LIG A  95     -54.176  46.559   7.360  4.00  0.00           H  
ATOM   3672  H8  LIG A  95     -43.660  59.207   6.210  6.00  0.00           H  
ATOM   3673  H8  LIG A  95     -11.545   5.110 -19.590  7.00  0.00           H  
ATOM   3674  H8  LIG A  95       1.201   8.131 -11.570  3.00  0.00           H  
END
