# Supplementary material for: Molecular Dynamics Study of the Interaction of Carbon Nanotubes with Telomeric DNA Fragment Containing Noncanonical G-Quadruplex and i-Motif Forms
Source: Int J Mol Sci. 2020 Mar 11;21(6):1925. doi: 10.3390/ijms21061925 (PMC7139311; doi:10.3390/ijms21061925)
Supplement: Supplementary file 1 [file ijms-21-01925-s001.zip › fig4_n20.pdb]

ATOM      1  C5' DG5 A   1      39.850  -4.476   9.330  6.00  0.00           C  
ATOM      2  O5' DG5 A   1      40.385  -5.159  10.480  6.00  0.00           O  
ATOM      3  C4' DG5 A   1      38.341  -4.788   9.190  1.00  0.00           C  
ATOM      4  O4' DG5 A   1      38.048  -6.090   8.790  5.00  0.00           O  
ATOM      5  C3' DG5 A   1      37.582  -4.448  10.500  5.00  0.00           C  
ATOM      6  O3' DG5 A   1      36.415  -3.781  10.100  7.00  0.00           O  
ATOM      7  C2' DG5 A   1      37.443  -5.780  11.110  1.00  0.00           C  
ATOM      8  C1' DG5 A   1      37.091  -6.495   9.750  5.00  0.00           C  
ATOM      9  N1  DG5 A   1      35.179 -11.037   8.160  1.00  0.00           N  
ATOM     10  C2  DG5 A   1      34.845  -9.766   7.730  7.00  0.00           C  
ATOM     11  N2  DG5 A   1      33.848  -9.724   6.910  7.00  0.00           N  
ATOM     12  N3  DG5 A   1      35.343  -8.634   8.290  7.00  0.00           N  
ATOM     13  C4  DG5 A   1      36.379  -8.880   9.170  4.00  0.00           C  
ATOM     14  C5  DG5 A   1      36.866 -10.137   9.560  8.00  0.00           C  
ATOM     15  C6  DG5 A   1      36.247 -11.300   8.970  4.00  0.00           C  
ATOM     16  O6  DG5 A   1      36.490 -12.452   9.240  6.00  0.00           O  
ATOM     17  N7  DG5 A   1      37.973 -10.063  10.370  9.00  0.00           N  
ATOM     18  C8  DG5 A   1      38.062  -8.754  10.610  8.00  0.00           C  
ATOM     19  N9  DG5 A   1      37.135  -8.024   9.880  1.00  0.00           N  
ATOM     20 HO5' DG5 A   1      40.864  -5.935  10.200  4.00  0.00           H  
ATOM     21  H1  DG5 A   1      34.528 -11.811   7.980  1.00  0.00           H  
ATOM     22  H8  DG5 A   1      38.848  -8.305  11.170  0.00  0.00           H  
ATOM     23  H1' DG5 A   1      36.115  -6.151   9.440  0.00  0.00           H  
ATOM     24  H2' DG5 A   1      38.289  -6.206  11.580  0.00  0.00           H  
ATOM     25  H21 DG5 A   1      33.379 -10.596   6.680  3.00  0.00           H  
ATOM     26  H3' DG5 A   1      38.191  -3.773  11.210  3.00  0.00           H  
ATOM     27  H22 DG5 A   1      33.507  -8.873   6.570  9.00  0.00           H  
ATOM     28  H4' DG5 A   1      37.975  -4.118   8.410  1.00  0.00           H  
ATOM     29  H5' DG5 A   1      40.360  -4.755   8.470  4.00  0.00           H  
ATOM     30 H2'' DG5 A   1      36.495  -5.808  11.660  9.00  0.00           H  
ATOM     31 H5'' DG5 A   1      39.982  -3.423   9.410  9.00  0.00           H  
ATOM     32  P    DG A   2      35.533  -2.866  11.030  9.00  0.00           P  
ATOM     33  C5'  DG A   2      33.523  -4.390  11.790  9.00  0.00           C  
ATOM     34  O5'  DG A   2      34.819  -3.893  11.960  8.00  0.00           O  
ATOM     35  C4'  DG A   2      33.206  -5.130  10.500  9.00  0.00           C  
ATOM     36  O4'  DG A   2      33.950  -6.336  10.410  1.00  0.00           O  
ATOM     37  C3'  DG A   2      31.628  -5.452  10.570  0.00  0.00           C  
ATOM     38  O3'  DG A   2      31.014  -5.220   9.260  2.00  0.00           O  
ATOM     39  C2'  DG A   2      31.686  -6.931  10.970  5.00  0.00           C  
ATOM     40  C1'  DG A   2      32.906  -7.366  10.260  7.00  0.00           C  
ATOM     41  N1   DG A   2      32.221 -12.513  10.510  2.00  0.00           N  
ATOM     42  C2   DG A   2      31.629 -11.577   9.690  9.00  0.00           C  
ATOM     43  N2   DG A   2      30.676 -12.035   8.940  4.00  0.00           N  
ATOM     44  N3   DG A   2      31.988 -10.284   9.700  0.00  0.00           N  
ATOM     45  C4   DG A   2      32.906  -9.912  10.600  0.00  0.00           C  
ATOM     46  C5   DG A   2      33.571 -10.771  11.400  5.00  0.00           C  
ATOM     47  C6   DG A   2      33.291 -12.233  11.320  5.00  0.00           C  
ATOM     48  O6   DG A   2      33.962 -13.123  11.940  5.00  0.00           O  
ATOM     49  N7   DG A   2      34.537 -10.006  12.100  5.00  0.00           N  
ATOM     50  C8   DG A   2      34.296  -8.763  11.780  9.00  0.00           C  
ATOM     51  N9   DG A   2      33.337  -8.637  10.840  8.00  0.00           N  
ATOM     52  OP1  DG A   2      34.598  -2.213  10.150  6.00  0.00           O  
ATOM     53  OP2  DG A   2      36.518  -2.149  11.870  0.00  0.00           O1-
ATOM     54  H1   DG A   2      31.895 -13.516  10.460  0.00  0.00           H  
ATOM     55  H8   DG A   2      34.772  -7.899  12.260  0.00  0.00           H  
ATOM     56  H1'  DG A   2      32.680  -7.415   9.160  9.00  0.00           H  
ATOM     57  H2'  DG A   2      31.866  -6.951  11.990  9.00  0.00           H  
ATOM     58  H21  DG A   2      30.453 -13.044   8.990  3.00  0.00           H  
ATOM     59  H3'  DG A   2      31.188  -4.832  11.340  9.00  0.00           H  
ATOM     60  H22  DG A   2      30.153 -11.395   8.410  6.00  0.00           H  
ATOM     61  H4'  DG A   2      33.465  -4.387   9.770  6.00  0.00           H  
ATOM     62  H5'  DG A   2      32.816  -3.521  11.940  7.00  0.00           H  
ATOM     63 H2''  DG A   2      30.845  -7.570  10.670  3.00  0.00           H  
ATOM     64 H5''  DG A   2      33.378  -5.064  12.650  1.00  0.00           H  
ATOM     65  P    DG A   3      29.533  -4.809   9.170  7.00  0.00           P  
ATOM     66  C5'  DG A   3      28.347  -6.994   8.280  3.00  0.00           C  
ATOM     67  O5'  DG A   3      28.620  -6.121   9.360  2.00  0.00           O  
ATOM     68  C4'  DG A   3      27.845  -8.379   8.710  0.00  0.00           C  
ATOM     69  O4'  DG A   3      28.772  -8.998   9.560  5.00  0.00           O  
ATOM     70  C3'  DG A   3      26.523  -8.289   9.500  1.00  0.00           C  
ATOM     71  O3'  DG A   3      25.576  -8.936   8.720  1.00  0.00           O  
ATOM     72  C2'  DG A   3      26.844  -8.898  10.830  8.00  0.00           C  
ATOM     73  C1'  DG A   3      27.969  -9.802  10.390  2.00  0.00           C  
ATOM     74  N1   DG A   3      28.924 -13.905  13.060  7.00  0.00           N  
ATOM     75  C2   DG A   3      28.142 -13.772  12.030  7.00  0.00           C  
ATOM     76  N2   DG A   3      27.298 -14.710  11.820  5.00  0.00           N  
ATOM     77  N3   DG A   3      27.967 -12.598  11.450  0.00  0.00           N  
ATOM     78  C4   DG A   3      28.644 -11.571  12.020  3.00  0.00           C  
ATOM     79  C5   DG A   3      29.517 -11.672  13.060  8.00  0.00           C  
ATOM     80  C6   DG A   3      29.582 -12.927  13.720  6.00  0.00           C  
ATOM     81  O6   DG A   3      30.148 -13.111  14.760  3.00  0.00           O  
ATOM     82  N7   DG A   3      30.061 -10.409  13.310  4.00  0.00           N  
ATOM     83  C8   DG A   3      29.584  -9.697  12.360  6.00  0.00           C  
ATOM     84  N9   DG A   3      28.901 -10.341  11.420  4.00  0.00           N  
ATOM     85  OP1  DG A   3      29.329  -4.290   7.830  4.00  0.00           O  
ATOM     86  OP2  DG A   3      29.236  -3.954  10.350  9.00  0.00           O1-
ATOM     87  H1   DG A   3      28.931 -14.764  13.610  2.00  0.00           H  
ATOM     88  H8   DG A   3      29.902  -8.627  12.330  4.00  0.00           H  
ATOM     89  H1'  DG A   3      27.445 -10.598   9.810  9.00  0.00           H  
ATOM     90  H2'  DG A   3      27.242  -8.075  11.410  3.00  0.00           H  
ATOM     91  H21  DG A   3      27.475 -15.556  12.430  2.00  0.00           H  
ATOM     92  H3'  DG A   3      26.267  -7.219   9.570  4.00  0.00           H  
ATOM     93  H22  DG A   3      26.542 -14.503  11.220  4.00  0.00           H  
ATOM     94  H4'  DG A   3      27.685  -9.021   7.890  9.00  0.00           H  
ATOM     95  H5'  DG A   3      29.292  -6.936   7.800  7.00  0.00           H  
ATOM     96 H2''  DG A   3      26.072  -9.393  11.400  1.00  0.00           H  
ATOM     97 H5''  DG A   3      27.511  -6.568   7.760  6.00  0.00           H  
ATOM     98  P    DT A   4      23.996  -8.809   9.140  2.00  0.00           P  
ATOM     99  C5'  DT A   4      23.836 -11.436   9.340  5.00  0.00           C  
ATOM    100  O5'  DT A   4      23.639 -10.170   9.980  5.00  0.00           O  
ATOM    101  C4'  DT A   4      23.678 -12.640  10.340  0.00  0.00           C  
ATOM    102  O4'  DT A   4      24.765 -12.814  11.230  5.00  0.00           O  
ATOM    103  C3'  DT A   4      22.331 -12.679  10.990  5.00  0.00           C  
ATOM    104  O3'  DT A   4      21.834 -14.079  10.960  4.00  0.00           O  
ATOM    105  C2'  DT A   4      22.815 -12.319  12.420  2.00  0.00           C  
ATOM    106  C1'  DT A   4      24.173 -13.078  12.500  0.00  0.00           C  
ATOM    107  N1   DT A   4      25.089 -12.593  13.600  6.00  0.00           N  
ATOM    108  C2   DT A   4      25.805 -13.564  14.360  9.00  0.00           C  
ATOM    109  O2   DT A   4      25.487 -14.737  14.320  7.00  0.00           O  
ATOM    110  N3   DT A   4      26.703 -13.098  15.270  0.00  0.00           N  
ATOM    111  C4   DT A   4      27.079 -11.806  15.420  2.00  0.00           C  
ATOM    112  O4   DT A   4      27.895 -11.609  16.370  2.00  0.00           O  
ATOM    113  C5   DT A   4      26.444 -10.876  14.510  2.00  0.00           C  
ATOM    114  C6   DT A   4      25.441 -11.244  13.720  0.00  0.00           C  
ATOM    115  C7   DT A   4      26.871  -9.332  14.560  0.00  0.00           C  
ATOM    116  OP1  DT A   4      23.261  -8.771   7.870  9.00  0.00           O  
ATOM    117  OP2  DT A   4      23.743  -7.609   9.980  3.00  0.00           O1-
ATOM    118  H3   DT A   4      27.252 -13.690  15.800  0.00  0.00           H  
ATOM    119  H6   DT A   4      25.013 -10.502  13.080  9.00  0.00           H  
ATOM    120  H1'  DT A   4      23.931 -14.057  12.560  3.00  0.00           H  
ATOM    121  H2'  DT A   4      22.995 -11.224  12.530  9.00  0.00           H  
ATOM    122  H3'  DT A   4      21.706 -11.870  10.510  9.00  0.00           H  
ATOM    123  H4'  DT A   4      23.748 -13.541   9.720  9.00  0.00           H  
ATOM    124  H5'  DT A   4      24.910 -11.395   8.950  4.00  0.00           H  
ATOM    125  H71  DT A   4      26.418  -8.801  13.730  3.00  0.00           H  
ATOM    126  H72  DT A   4      26.673  -8.850  15.500  5.00  0.00           H  
ATOM    127  H73  DT A   4      27.933  -9.228  14.440  5.00  0.00           H  
ATOM    128 H2''  DT A   4      22.166 -12.759  13.190  3.00  0.00           H  
ATOM    129 H5''  DT A   4      23.151 -11.689   8.540  0.00  0.00           H  
ATOM    130  P    DT A   5      20.238 -14.342  11.020  7.00  0.00           P  
ATOM    131  C5'  DT A   5      20.451 -15.974  12.990  2.00  0.00           C  
ATOM    132  O5'  DT A   5      19.888 -14.784  12.480  3.00  0.00           O  
ATOM    133  C4'  DT A   5      20.630 -16.161  14.520  1.00  0.00           C  
ATOM    134  O4'  DT A   5      21.746 -15.405  15.010  0.00  0.00           O  
ATOM    135  C3'  DT A   5      19.504 -15.587  15.370  4.00  0.00           C  
ATOM    136  O3'  DT A   5      19.065 -16.492  16.400  6.00  0.00           O  
ATOM    137  C2'  DT A   5      19.998 -14.340  15.980  3.00  0.00           C  
ATOM    138  C1'  DT A   5      21.464 -14.789  16.260  2.00  0.00           C  
ATOM    139  N1   DT A   5      22.427 -13.659  16.500  7.00  0.00           N  
ATOM    140  C2   DT A   5      23.500 -13.951  17.340  8.00  0.00           C  
ATOM    141  O2   DT A   5      23.652 -15.089  17.830  7.00  0.00           O  
ATOM    142  N3   DT A   5      24.258 -12.860  17.700  5.00  0.00           N  
ATOM    143  C4   DT A   5      24.098 -11.536  17.280  1.00  0.00           C  
ATOM    144  O4   DT A   5      24.896 -10.694  17.600  9.00  0.00           O  
ATOM    145  C5   DT A   5      23.013 -11.356  16.280  1.00  0.00           C  
ATOM    146  C6   DT A   5      22.286 -12.410  15.940  8.00  0.00           C  
ATOM    147  C7   DT A   5      22.738  -9.981  15.710  2.00  0.00           C  
ATOM    148  OP1  DT A   5      19.845 -15.530  10.220  7.00  0.00           O  
ATOM    149  OP2  DT A   5      19.434 -13.132  10.820  8.00  0.00           O1-
ATOM    150  H3   DT A   5      25.142 -13.006  18.190  7.00  0.00           H  
ATOM    151  H6   DT A   5      21.570 -12.347  15.080  5.00  0.00           H  
ATOM    152  H1'  DT A   5      21.426 -15.565  17.090  8.00  0.00           H  
ATOM    153  H2'  DT A   5      19.841 -13.631  15.150  9.00  0.00           H  
ATOM    154  H3'  DT A   5      18.682 -15.381  14.700  2.00  0.00           H  
ATOM    155  H4'  DT A   5      20.770 -17.242  14.690  9.00  0.00           H  
ATOM    156  H5'  DT A   5      21.430 -16.228  12.540  5.00  0.00           H  
ATOM    157  H71  DT A   5      22.425  -9.336  16.500  0.00  0.00           H  
ATOM    158  H72  DT A   5      23.569  -9.499  15.210  7.00  0.00           H  
ATOM    159  H73  DT A   5      22.042 -10.081  14.860  8.00  0.00           H  
ATOM    160 H2''  DT A   5      19.482 -14.064  16.850  3.00  0.00           H  
ATOM    161 H5''  DT A   5      19.599 -16.659  12.780  0.00  0.00           H  
ATOM    162  P    DA A   6      17.713 -17.304  16.220  1.00  0.00           P  
ATOM    163  C5'  DA A   6      18.486 -19.503  17.460  6.00  0.00           C  
ATOM    164  O5'  DA A   6      17.683 -18.303  17.430  1.00  0.00           O  
ATOM    165  C4'  DA A   6      19.367 -19.877  18.690  1.00  0.00           C  
ATOM    166  O4'  DA A   6      20.209 -18.738  18.890  5.00  0.00           O  
ATOM    167  C3'  DA A   6      18.567 -20.078  19.980  1.00  0.00           C  
ATOM    168  O3'  DA A   6      19.263 -20.968  20.860  1.00  0.00           O  
ATOM    169  C2'  DA A   6      18.587 -18.650  20.510  1.00  0.00           C  
ATOM    170  C1'  DA A   6      20.067 -18.221  20.190  9.00  0.00           C  
ATOM    171  N1   DA A   6      22.995 -14.192  21.800  9.00  0.00           N  
ATOM    172  C2   DA A   6      23.052 -15.446  22.190  6.00  0.00           C  
ATOM    173  N3   DA A   6      22.237 -16.414  21.760  3.00  0.00           N  
ATOM    174  C4   DA A   6      21.318 -16.033  20.830  5.00  0.00           C  
ATOM    175  C5   DA A   6      21.071 -14.736  20.440  1.00  0.00           C  
ATOM    176  C6   DA A   6      21.987 -13.782  20.990  1.00  0.00           C  
ATOM    177  N6   DA A   6      21.982 -12.507  20.540  7.00  0.00           N  
ATOM    178  N7   DA A   6      20.060 -14.697  19.490  3.00  0.00           N  
ATOM    179  C8   DA A   6      19.649 -15.916  19.400  4.00  0.00           C  
ATOM    180  N9   DA A   6      20.403 -16.806  20.090  6.00  0.00           N  
ATOM    181  OP1  DA A   6      17.854 -18.162  15.020  0.00  0.00           O  
ATOM    182  OP2  DA A   6      16.520 -16.410  16.290  3.00  0.00           O1-
ATOM    183  H2   DA A   6      23.681 -15.781  22.970  5.00  0.00           H  
ATOM    184  H8   DA A   6      18.788 -16.201  18.770  7.00  0.00           H  
ATOM    185  H1'  DA A   6      20.806 -18.720  20.850  1.00  0.00           H  
ATOM    186  H2'  DA A   6      17.874 -18.027  19.970  6.00  0.00           H  
ATOM    187  H3'  DA A   6      17.569 -20.396  19.740  9.00  0.00           H  
ATOM    188  H4'  DA A   6      19.980 -20.749  18.480  8.00  0.00           H  
ATOM    189  H5'  DA A   6      19.154 -19.554  16.590  5.00  0.00           H  
ATOM    190  H61  DA A   6      22.463 -11.821  20.880  0.00  0.00           H  
ATOM    191  H62  DA A   6      21.360 -12.358  19.700  4.00  0.00           H  
ATOM    192 H2''  DA A   6      18.459 -18.646  21.600  8.00  0.00           H  
ATOM    193 H5''  DA A   6      17.952 -20.400  17.420  2.00  0.00           H  
ATOM    194  P    DG A   7      18.463 -21.642  22.050  4.00  0.00           P  
ATOM    195  C5'  DG A   7      20.055 -20.537  23.970  3.00  0.00           C  
ATOM    196  O5'  DG A   7      18.824 -20.595  23.240  8.00  0.00           O  
ATOM    197  C4'  DG A   7      20.128 -19.365  25.000  2.00  0.00           C  
ATOM    198  O4'  DG A   7      20.197 -18.094  24.480  8.00  0.00           O  
ATOM    199  C3'  DG A   7      18.799 -19.243  25.850  5.00  0.00           C  
ATOM    200  O3'  DG A   7      19.118 -18.937  27.170  1.00  0.00           O  
ATOM    201  C2'  DG A   7      18.047 -18.144  25.210  4.00  0.00           C  
ATOM    202  C1'  DG A   7      19.226 -17.232  24.930  3.00  0.00           C  
ATOM    203  N1   DG A   7      20.551 -12.502  24.020  0.00  0.00           N  
ATOM    204  C2   DG A   7      21.139 -13.491  24.860  1.00  0.00           C  
ATOM    205  N2   DG A   7      22.171 -13.129  25.590  0.00  0.00           N  
ATOM    206  N3   DG A   7      20.705 -14.704  24.950  2.00  0.00           N  
ATOM    207  C4   DG A   7      19.582 -14.959  24.180  7.00  0.00           C  
ATOM    208  C5   DG A   7      19.048 -14.119  23.200  8.00  0.00           C  
ATOM    209  C6   DG A   7      19.644 -12.831  23.040  2.00  0.00           C  
ATOM    210  O6   DG A   7      19.358 -11.986  22.140  9.00  0.00           O  
ATOM    211  N7   DG A   7      18.056 -14.838  22.470  9.00  0.00           N  
ATOM    212  C8   DG A   7      18.021 -16.007  23.010  5.00  0.00           C  
ATOM    213  N9   DG A   7      18.873 -16.129  24.060  2.00  0.00           N  
ATOM    214  OP1  DG A   7      19.170 -22.913  22.410  4.00  0.00           O  
ATOM    215  OP2  DG A   7      17.007 -21.587  21.850  1.00  0.00           O1-
ATOM    216  H1   DG A   7      21.089 -11.713  23.830  7.00  0.00           H  
ATOM    217  H8   DG A   7      17.369 -16.809  22.620  3.00  0.00           H  
ATOM    218  H1'  DG A   7      19.540 -16.933  25.910  9.00  0.00           H  
ATOM    219  H2'  DG A   7      17.700 -18.585  24.220  9.00  0.00           H  
ATOM    220  H21  DG A   7      22.446 -12.177  25.570  6.00  0.00           H  
ATOM    221  H3'  DG A   7      18.285 -20.185  25.810  7.00  0.00           H  
ATOM    222  H22  DG A   7      22.586 -13.796  26.230  3.00  0.00           H  
ATOM    223  H4'  DG A   7      21.037 -19.602  25.620  0.00  0.00           H  
ATOM    224  H5'  DG A   7      20.952 -20.441  23.260  4.00  0.00           H  
ATOM    225 H2''  DG A   7      17.348 -17.674  25.890  4.00  0.00           H  
ATOM    226 H5''  DG A   7      20.018 -21.537  24.500  4.00  0.00           H  
ATOM    227  P    DG A   8      19.325 -19.997  28.250  6.00  0.00           P  
ATOM    228  C5'  DG A   8      21.086 -18.741  29.860  4.00  0.00           C  
ATOM    229  O5'  DG A   8      19.742 -19.131  29.550  0.00  0.00           O  
ATOM    230  C4'  DG A   8      21.171 -17.473  30.670  3.00  0.00           C  
ATOM    231  O4'  DG A   8      21.106 -16.329  29.830  7.00  0.00           O  
ATOM    232  C3'  DG A   8      20.028 -17.295  31.730  6.00  0.00           C  
ATOM    233  O3'  DG A   8      20.494 -16.712  32.920  5.00  0.00           O  
ATOM    234  C2'  DG A   8      19.068 -16.374  30.980  7.00  0.00           C  
ATOM    235  C1'  DG A   8      19.964 -15.493  30.110  6.00  0.00           C  
ATOM    236  N1   DG A   8      19.160 -11.612  26.830  9.00  0.00           N  
ATOM    237  C2   DG A   8      20.002 -11.752  27.840  7.00  0.00           C  
ATOM    238  N2   DG A   8      20.810 -10.761  27.980  3.00  0.00           N  
ATOM    239  N3   DG A   8      20.152 -12.840  28.530  0.00  0.00           N  
ATOM    240  C4   DG A   8      19.363 -13.885  28.140  8.00  0.00           C  
ATOM    241  C5   DG A   8      18.424 -13.913  27.150  0.00  0.00           C  
ATOM    242  C6   DG A   8      18.291 -12.694  26.450  1.00  0.00           C  
ATOM    243  O6   DG A   8      17.475 -12.396  25.570  1.00  0.00           O  
ATOM    244  N7   DG A   8      17.738 -15.135  27.100  0.00  0.00           N  
ATOM    245  C8   DG A   8      18.326 -15.848  28.030  1.00  0.00           C  
ATOM    246  N9   DG A   8      19.232 -15.103  28.810  4.00  0.00           N  
ATOM    247  OP1  DG A   8      20.449 -20.961  27.860  7.00  0.00           O  
ATOM    248  OP2  DG A   8      17.989 -20.650  28.450  6.00  0.00           O1-
ATOM    249  H1   DG A   8      19.145 -10.766  26.290  5.00  0.00           H  
ATOM    250  H8   DG A   8      18.132 -16.879  28.180  8.00  0.00           H  
ATOM    251  H1'  DG A   8      20.254 -14.634  30.720  8.00  0.00           H  
ATOM    252  H2'  DG A   8      18.353 -17.016  30.440  9.00  0.00           H  
ATOM    253  H21  DG A   8      20.536  -9.843  27.610  1.00  0.00           H  
ATOM    254  H3'  DG A   8      19.690 -18.309  31.970  4.00  0.00           H  
ATOM    255  H22  DG A   8      21.417 -10.804  28.770  6.00  0.00           H  
ATOM    256  H4'  DG A   8      22.085 -17.460  31.310  2.00  0.00           H  
ATOM    257  H5'  DG A   8      21.640 -18.563  29.010  4.00  0.00           H  
ATOM    258 H2''  DG A   8      18.515 -15.655  31.650  2.00  0.00           H  
ATOM    259 H5''  DG A   8      21.549 -19.583  30.500  1.00  0.00           H  
ATOM    260  P    DG A   9      19.508 -16.406  34.270  4.00  0.00           P  
ATOM    261  C5'  DG A   9      20.369 -13.922  33.600  3.00  0.00           C  
ATOM    262  O5'  DG A   9      19.239 -14.824  33.850  7.00  0.00           O  
ATOM    263  C4'  DG A   9      19.944 -12.580  32.990  4.00  0.00           C  
ATOM    264  O4'  DG A   9      19.321 -12.742  31.720  3.00  0.00           O  
ATOM    265  C3'  DG A   9      19.024 -11.730  33.830  7.00  0.00           C  
ATOM    266  O3'  DG A   9      19.625 -10.523  34.260  2.00  0.00           O  
ATOM    267  C2'  DG A   9      17.837 -11.533  32.900  9.00  0.00           C  
ATOM    268  C1'  DG A   9      18.512 -11.649  31.560  1.00  0.00           C  
ATOM    269  N1   DG A   9      15.508  -9.317  28.120  5.00  0.00           N  
ATOM    270  C2   DG A   9      16.392  -8.789  28.960  2.00  0.00           C  
ATOM    271  N2   DG A   9      16.499  -7.509  28.940  7.00  0.00           N  
ATOM    272  N3   DG A   9      17.116  -9.476  29.870  2.00  0.00           N  
ATOM    273  C4   DG A   9      16.883 -10.809  29.770  4.00  0.00           C  
ATOM    274  C5   DG A   9      16.129 -11.502  28.810  4.00  0.00           C  
ATOM    275  C6   DG A   9      15.473 -10.658  27.810  9.00  0.00           C  
ATOM    276  O6   DG A   9      14.925 -10.967  26.760  7.00  0.00           O  
ATOM    277  N7   DG A   9      16.174 -12.886  29.010  7.00  0.00           N  
ATOM    278  C8   DG A   9      16.997 -12.994  30.030  7.00  0.00           C  
ATOM    279  N9   DG A   9      17.498 -11.830  30.490  5.00  0.00           N  
ATOM    280  OP1  DG A   9      20.354 -16.441  35.480  6.00  0.00           O  
ATOM    281  OP2  DG A   9      18.247 -17.209  34.190  9.00  0.00           O1-
ATOM    282  H1   DG A   9      14.954  -8.745  27.420  2.00  0.00           H  
ATOM    283  H8   DG A   9      17.319 -13.910  30.380  8.00  0.00           H  
ATOM    284  H1'  DG A   9      19.164 -10.837  31.210  2.00  0.00           H  
ATOM    285  H2'  DG A   9      17.142 -12.327  33.230  8.00  0.00           H  
ATOM    286  H21  DG A   9      15.854  -6.977  28.310  8.00  0.00           H  
ATOM    287  H3'  DG A   9      18.717 -12.373  34.650  0.00  0.00           H  
ATOM    288  H22  DG A   9      16.921  -7.148  29.760  8.00  0.00           H  
ATOM    289  H4'  DG A   9      20.824 -11.985  32.750  9.00  0.00           H  
ATOM    290  H5'  DG A   9      21.140 -14.368  32.960  7.00  0.00           H  
ATOM    291 H2''  DG A   9      17.556 -10.420  33.010  9.00  0.00           H  
ATOM    292 H5''  DG A   9      20.870 -13.667  34.540  9.00  0.00           H  
ATOM    293  P    DT A  10      18.948  -9.615  35.280  3.00  0.00           P  
ATOM    294  C5'  DT A  10      18.503  -7.569  33.580  2.00  0.00           C  
ATOM    295  O5'  DT A  10      18.008  -8.585  34.410  7.00  0.00           O  
ATOM    296  C4'  DT A  10      17.430  -6.561  33.270  8.00  0.00           C  
ATOM    297  O4'  DT A  10      16.614  -7.006  32.240  1.00  0.00           O  
ATOM    298  C3'  DT A  10      16.413  -5.977  34.350  9.00  0.00           C  
ATOM    299  O3'  DT A  10      16.096  -4.633  34.080  5.00  0.00           O  
ATOM    300  C2'  DT A  10      15.242  -6.849  34.110  0.00  0.00           C  
ATOM    301  C1'  DT A  10      15.274  -6.923  32.580  8.00  0.00           C  
ATOM    302  N1   DT A  10      14.539  -8.073  31.980  5.00  0.00           N  
ATOM    303  C2   DT A  10      13.685  -7.787  30.960  2.00  0.00           C  
ATOM    304  O2   DT A  10      13.492  -6.676  30.380  3.00  0.00           O  
ATOM    305  N3   DT A  10      13.170  -8.902  30.340  4.00  0.00           N  
ATOM    306  C4   DT A  10      13.249 -10.184  30.760  8.00  0.00           C  
ATOM    307  O4   DT A  10      12.673 -11.064  30.160  7.00  0.00           O  
ATOM    308  C5   DT A  10      14.069 -10.409  31.980  3.00  0.00           C  
ATOM    309  C6   DT A  10      14.694  -9.329  32.530  9.00  0.00           C  
ATOM    310  C7   DT A  10      14.250 -11.837  32.450  7.00  0.00           C  
ATOM    311  OP1  DT A  10      20.099  -8.868  35.860  9.00  0.00           O  
ATOM    312  OP2  DT A  10      18.087 -10.377  36.090  8.00  0.00           O1-
ATOM    313  H3   DT A  10      12.764  -8.748  29.450  2.00  0.00           H  
ATOM    314  H6   DT A  10      15.262  -9.452  33.490  2.00  0.00           H  
ATOM    315  H1'  DT A  10      14.977  -5.923  32.160  2.00  0.00           H  
ATOM    316  H2'  DT A  10      15.487  -7.794  34.600  4.00  0.00           H  
ATOM    317  H3'  DT A  10      16.873  -6.180  35.310  5.00  0.00           H  
ATOM    318  H4'  DT A  10      17.876  -5.732  32.810  2.00  0.00           H  
ATOM    319  H5'  DT A  10      18.853  -8.068  32.650  6.00  0.00           H  
ATOM    320  H71  DT A  10      14.983 -11.945  33.220  4.00  0.00           H  
ATOM    321  H72  DT A  10      13.263 -12.267  32.690  5.00  0.00           H  
ATOM    322  H73  DT A  10      14.563 -12.435  31.600  8.00  0.00           H  
ATOM    323 H2''  DT A  10      14.371  -6.364  34.490  0.00  0.00           H  
ATOM    324 H5''  DT A  10      19.388  -7.029  33.980  6.00  0.00           H  
ATOM    325  P    DT A  11      15.581  -3.621  35.110  7.00  0.00           P  
ATOM    326  C5'  DT A  11      13.677  -2.862  33.480  3.00  0.00           C  
ATOM    327  O5'  DT A  11      14.007  -3.498  34.700  4.00  0.00           O  
ATOM    328  C4'  DT A  11      12.336  -3.380  32.820  4.00  0.00           C  
ATOM    329  O4'  DT A  11      12.381  -4.778  32.580  2.00  0.00           O  
ATOM    330  C3'  DT A  11      11.079  -3.113  33.710  9.00  0.00           C  
ATOM    331  O3'  DT A  11       9.939  -2.643  33.090  4.00  0.00           O  
ATOM    332  C2'  DT A  11      10.710  -4.539  34.150  3.00  0.00           C  
ATOM    333  C1'  DT A  11      11.116  -5.337  32.920  8.00  0.00           C  
ATOM    334  N1   DT A  11      11.149  -6.828  33.050  5.00  0.00           N  
ATOM    335  C2   DT A  11      10.455  -7.501  32.100  7.00  0.00           C  
ATOM    336  O2   DT A  11       9.922  -7.014  31.110  6.00  0.00           O  
ATOM    337  N3   DT A  11      10.376  -8.872  32.240  7.00  0.00           N  
ATOM    338  C4   DT A  11      10.869  -9.607  33.270  0.00  0.00           C  
ATOM    339  O4   DT A  11      10.469 -10.714  33.210  6.00  0.00           O  
ATOM    340  C5   DT A  11      11.703  -8.833  34.230  9.00  0.00           C  
ATOM    341  C6   DT A  11      11.764  -7.480  34.110  9.00  0.00           C  
ATOM    342  C7   DT A  11      12.395  -9.642  35.300  8.00  0.00           C  
ATOM    343  OP1  DT A  11      16.224  -2.307  34.840  7.00  0.00           O  
ATOM    344  OP2  DT A  11      15.659  -4.110  36.500  3.00  0.00           O1-
ATOM    345  H3   DT A  11       9.882  -9.359  31.480  3.00  0.00           H  
ATOM    346  H6   DT A  11      12.363  -6.999  34.860  6.00  0.00           H  
ATOM    347  H1'  DT A  11      10.389  -5.155  32.100  2.00  0.00           H  
ATOM    348  H2'  DT A  11      11.224  -4.879  35.040  8.00  0.00           H  
ATOM    349  H3'  DT A  11      11.194  -2.459  34.540  7.00  0.00           H  
ATOM    350  H4'  DT A  11      12.241  -2.928  31.900  3.00  0.00           H  
ATOM    351  H5'  DT A  11      14.492  -3.135  32.770  0.00  0.00           H  
ATOM    352  H71  DT A  11      11.763 -10.219  35.960  0.00  0.00           H  
ATOM    353  H72  DT A  11      13.012 -10.456  34.890  7.00  0.00           H  
ATOM    354  H73  DT A  11      13.040  -9.007  35.950  3.00  0.00           H  
ATOM    355 H2''  DT A  11       9.702  -4.532  34.350  7.00  0.00           H  
ATOM    356 H5''  DT A  11      13.861  -1.823  33.580  2.00  0.00           H  
ATOM    357  P    DA A  12       9.873  -1.252  32.430  6.00  0.00           P  
ATOM    358  C5'  DA A  12       7.814   0.020  33.730  6.00  0.00           C  
ATOM    359  O5'  DA A  12       8.347  -0.702  32.590  3.00  0.00           O  
ATOM    360  C4'  DA A  12       7.603  -0.781  35.060  7.00  0.00           C  
ATOM    361  O4'  DA A  12       6.900   0.138  35.900  6.00  0.00           O  
ATOM    362  C3'  DA A  12       6.619  -2.003  34.950  4.00  0.00           C  
ATOM    363  O3'  DA A  12       7.075  -3.067  35.720  4.00  0.00           O  
ATOM    364  C2'  DA A  12       5.340  -1.444  35.580  3.00  0.00           C  
ATOM    365  C1'  DA A  12       5.945  -0.590  36.650  9.00  0.00           C  
ATOM    366  N1   DA A  12       2.878   0.451  40.590  0.00  0.00           N  
ATOM    367  C2   DA A  12       4.121  -0.076  40.570  1.00  0.00           C  
ATOM    368  N3   DA A  12       4.879  -0.237  39.470  9.00  0.00           N  
ATOM    369  C4   DA A  12       4.333   0.383  38.350  1.00  0.00           C  
ATOM    370  C5   DA A  12       3.180   1.080  38.260  4.00  0.00           C  
ATOM    371  C6   DA A  12       2.405   1.010  39.470  0.00  0.00           C  
ATOM    372  N6   DA A  12       1.259   1.618  39.710  9.00  0.00           N  
ATOM    373  N7   DA A  12       2.997   1.537  36.960  8.00  0.00           N  
ATOM    374  C8   DA A  12       4.091   1.182  36.380  4.00  0.00           C  
ATOM    375  N9   DA A  12       4.919   0.414  37.130  4.00  0.00           N  
ATOM    376  OP1  DA A  12      10.117  -1.458  31.000  6.00  0.00           O  
ATOM    377  OP2  DA A  12      10.795  -0.381  33.170  5.00  0.00           O1-
ATOM    378  H2   DA A  12       4.495  -0.489  41.530  4.00  0.00           H  
ATOM    379  H8   DA A  12       4.275   1.385  35.370  3.00  0.00           H  
ATOM    380  H1'  DA A  12       6.270  -1.170  37.490  4.00  0.00           H  
ATOM    381  H2'  DA A  12       4.811  -0.832  34.810  1.00  0.00           H  
ATOM    382  H3'  DA A  12       6.468  -2.235  33.880  1.00  0.00           H  
ATOM    383  H4'  DA A  12       8.590  -1.057  35.560  5.00  0.00           H  
ATOM    384  H5'  DA A  12       6.819   0.393  33.470  2.00  0.00           H  
ATOM    385  H61  DA A  12       0.837   1.513  40.620  2.00  0.00           H  
ATOM    386  H62  DA A  12       0.831   2.092  38.890  7.00  0.00           H  
ATOM    387 H2''  DA A  12       4.769  -2.196  36.000  9.00  0.00           H  
ATOM    388 H5''  DA A  12       8.520   0.847  33.850  3.00  0.00           H  
ATOM    389  P    DG A  13       6.464  -4.437  35.780  7.00  0.00           P  
ATOM    390  C5'  DG A  13       5.651  -4.209  38.330  9.00  0.00           C  
ATOM    391  O5'  DG A  13       5.347  -4.538  36.910  2.00  0.00           O  
ATOM    392  C4'  DG A  13       4.444  -4.065  39.160  5.00  0.00           C  
ATOM    393  O4'  DG A  13       3.582  -3.063  38.520  4.00  0.00           O  
ATOM    394  C3'  DG A  13       3.544  -5.324  39.280  3.00  0.00           C  
ATOM    395  O3'  DG A  13       2.974  -5.439  40.520  7.00  0.00           O  
ATOM    396  C2'  DG A  13       2.546  -5.173  38.170  0.00  0.00           C  
ATOM    397  C1'  DG A  13       2.433  -3.646  37.980  9.00  0.00           C  
ATOM    398  N1   DG A  13       0.545   0.254  35.250  4.00  0.00           N  
ATOM    399  C2   DG A  13       0.261  -0.198  36.520  0.00  0.00           C  
ATOM    400  N2   DG A  13      -0.429   0.581  37.250  2.00  0.00           N  
ATOM    401  N3   DG A  13       0.811  -1.230  37.100  8.00  0.00           N  
ATOM    402  C4   DG A  13       1.534  -1.984  36.230  4.00  0.00           C  
ATOM    403  C5   DG A  13       1.724  -1.793  34.870  0.00  0.00           C  
ATOM    404  C6   DG A  13       1.174  -0.547  34.300  4.00  0.00           C  
ATOM    405  O6   DG A  13       1.155  -0.208  33.130  4.00  0.00           O  
ATOM    406  N7   DG A  13       2.477  -2.830  34.330  1.00  0.00           N  
ATOM    407  C8   DG A  13       2.709  -3.590  35.410  1.00  0.00           C  
ATOM    408  N9   DG A  13       2.200  -3.121  36.590  2.00  0.00           N  
ATOM    409  OP1  DG A  13       7.539  -5.337  36.330  7.00  0.00           O  
ATOM    410  OP2  DG A  13       5.861  -4.761  34.470  5.00  0.00           O1-
ATOM    411  H1   DG A  13       0.074   1.023  34.860  5.00  0.00           H  
ATOM    412  H8   DG A  13       3.281  -4.562  35.250  1.00  0.00           H  
ATOM    413  H1'  DG A  13       1.646  -3.271  38.620  6.00  0.00           H  
ATOM    414  H2'  DG A  13       2.761  -5.706  37.190  2.00  0.00           H  
ATOM    415  H21  DG A  13      -0.827   1.403  36.850  6.00  0.00           H  
ATOM    416  H3'  DG A  13       4.123  -6.219  39.030  9.00  0.00           H  
ATOM    417  H22  DG A  13      -0.663   0.222  38.120  3.00  0.00           H  
ATOM    418  H4'  DG A  13       4.698  -3.709  40.140  7.00  0.00           H  
ATOM    419  H5'  DG A  13       6.155  -3.263  38.170  5.00  0.00           H  
ATOM    420 H2''  DG A  13       1.503  -5.462  38.380  0.00  0.00           H  
ATOM    421 H5''  DG A  13       6.381  -5.005  38.740  5.00  0.00           H  
ATOM    422  P    DG A  14       3.228  -6.680  41.480  2.00  0.00           P  
ATOM    423  C5'  DG A  14       1.324  -6.117  43.310  0.00  0.00           C  
ATOM    424  O5'  DG A  14       2.728  -6.287  43.000  0.00  0.00           O  
ATOM    425  C4'  DG A  14       0.830  -4.636  43.220  0.00  0.00           C  
ATOM    426  O4'  DG A  14       0.544  -4.488  41.850  6.00  0.00           O  
ATOM    427  C3'  DG A  14       1.781  -3.462  43.650  4.00  0.00           C  
ATOM    428  O3'  DG A  14       1.674  -2.999  44.960  9.00  0.00           O  
ATOM    429  C2'  DG A  14       1.069  -2.388  42.730  8.00  0.00           C  
ATOM    430  C1'  DG A  14       0.831  -3.159  41.400  8.00  0.00           C  
ATOM    431  N1   DG A  14      -2.156  -3.805  37.310  1.00  0.00           N  
ATOM    432  C2   DG A  14      -1.589  -4.751  38.030  8.00  0.00           C  
ATOM    433  N2   DG A  14      -1.480  -5.956  37.450  2.00  0.00           N  
ATOM    434  N3   DG A  14      -0.954  -4.513  39.180  2.00  0.00           N  
ATOM    435  C4   DG A  14      -0.948  -3.214  39.550  5.00  0.00           C  
ATOM    436  C5   DG A  14      -1.592  -2.213  38.920  4.00  0.00           C  
ATOM    437  C6   DG A  14      -2.314  -2.486  37.700  3.00  0.00           C  
ATOM    438  O6   DG A  14      -2.893  -1.722  36.980  4.00  0.00           O  
ATOM    439  N7   DG A  14      -1.528  -1.007  39.620  8.00  0.00           N  
ATOM    440  C8   DG A  14      -0.695  -1.245  40.620  0.00  0.00           C  
ATOM    441  N9   DG A  14      -0.218  -2.537  40.540  8.00  0.00           N  
ATOM    442  OP1  DG A  14       4.665  -6.745  41.680  0.00  0.00           O  
ATOM    443  OP2  DG A  14       2.524  -7.907  41.150  9.00  0.00           O1-
ATOM    444  H1   DG A  14      -2.376  -4.047  36.380  5.00  0.00           H  
ATOM    445  H8   DG A  14      -0.548  -0.510  41.430  9.00  0.00           H  
ATOM    446  H1'  DG A  14       1.729  -3.136  40.790  1.00  0.00           H  
ATOM    447  H2'  DG A  14       0.117  -2.054  43.240  5.00  0.00           H  
ATOM    448  H21  DG A  14      -2.085  -6.175  36.750  3.00  0.00           H  
ATOM    449  H3'  DG A  14       2.867  -3.691  43.280  1.00  0.00           H  
ATOM    450  H22  DG A  14      -1.116  -6.767  37.850  1.00  0.00           H  
ATOM    451  H4'  DG A  14      -0.103  -4.622  43.860  2.00  0.00           H  
ATOM    452  H5'  DG A  14       1.159  -6.455  44.320  0.00  0.00           H  
ATOM    453 H2''  DG A  14       1.692  -1.584  42.680  6.00  0.00           H  
ATOM    454 H5''  DG A  14       0.602  -6.687  42.640  2.00  0.00           H  
ATOM    455  P    DG A  15       2.082  -3.892  46.140  6.00  0.00           P  
ATOM    456  C5'  DG A  15      -0.398  -4.477  46.780  5.00  0.00           C  
ATOM    457  O5'  DG A  15       0.814  -4.906  46.210  4.00  0.00           O  
ATOM    458  C4'  DG A  15      -0.986  -3.053  46.360  0.00  0.00           C  
ATOM    459  O4'  DG A  15      -1.199  -2.987  44.930  1.00  0.00           O  
ATOM    460  C3'  DG A  15      -2.363  -2.941  47.000  5.00  0.00           C  
ATOM    461  O3'  DG A  15      -2.888  -1.587  47.150  9.00  0.00           O  
ATOM    462  C2'  DG A  15      -3.245  -3.627  45.960  1.00  0.00           C  
ATOM    463  C1'  DG A  15      -2.614  -3.016  44.690  5.00  0.00           C  
ATOM    464  N1   DG A  15      -4.923  -2.457  40.200  1.00  0.00           N  
ATOM    465  C2   DG A  15      -4.706  -1.603  41.190  9.00  0.00           C  
ATOM    466  N2   DG A  15      -5.088  -0.315  41.030  0.00  0.00           N  
ATOM    467  N3   DG A  15      -4.179  -1.848  42.340  6.00  0.00           N  
ATOM    468  C4   DG A  15      -3.628  -3.124  42.320  3.00  0.00           C  
ATOM    469  C5   DG A  15      -3.654  -4.002  41.310  7.00  0.00           C  
ATOM    470  C6   DG A  15      -4.391  -3.686  40.160  2.00  0.00           C  
ATOM    471  O6   DG A  15      -4.646  -4.389  39.210  1.00  0.00           O  
ATOM    472  N7   DG A  15      -3.189  -5.257  41.820  8.00  0.00           N  
ATOM    473  C8   DG A  15      -2.726  -5.003  43.030  5.00  0.00           C  
ATOM    474  N9   DG A  15      -2.909  -3.656  43.360  4.00  0.00           N  
ATOM    475  OP1  DG A  15       1.970  -3.140  47.430  7.00  0.00           O  
ATOM    476  OP2  DG A  15       3.369  -4.544  45.900  0.00  0.00           O1-
ATOM    477  H1   DG A  15      -5.335  -2.086  39.290  9.00  0.00           H  
ATOM    478  H8   DG A  15      -2.160  -5.657  43.650  5.00  0.00           H  
ATOM    479  H1'  DG A  15      -2.861  -1.948  44.590  1.00  0.00           H  
ATOM    480  H2'  DG A  15      -3.189  -4.648  46.040  0.00  0.00           H  
ATOM    481  H21  DG A  15      -5.488  -0.003  40.140  7.00  0.00           H  
ATOM    482  H3'  DG A  15      -2.398  -3.507  47.900  3.00  0.00           H  
ATOM    483  H22  DG A  15      -4.684   0.311  41.730  3.00  0.00           H  
ATOM    484  H4'  DG A  15      -0.292  -2.256  46.720  9.00  0.00           H  
ATOM    485  H5'  DG A  15      -0.404  -4.462  47.900  4.00  0.00           H  
ATOM    486 H2''  DG A  15      -4.265  -3.295  46.190  1.00  0.00           H  
ATOM    487 H5''  DG A  15      -1.061  -5.217  46.540  8.00  0.00           H  
ATOM    488  P    DT A  16      -3.096  -1.090  48.650  6.00  0.00           P  
ATOM    489  C5'  DT A  16      -2.203   1.331  48.080  2.00  0.00           C  
ATOM    490  O5'  DT A  16      -3.160   0.503  48.680  6.00  0.00           O  
ATOM    491  C4'  DT A  16      -2.694   1.999  46.800  0.00  0.00           C  
ATOM    492  O4'  DT A  16      -1.602   2.605  46.090  1.00  0.00           O  
ATOM    493  C3'  DT A  16      -3.495   1.280  45.720  9.00  0.00           C  
ATOM    494  O3'  DT A  16      -4.169   2.145  44.770  2.00  0.00           O  
ATOM    495  C2'  DT A  16      -2.337   0.659  44.940  8.00  0.00           C  
ATOM    496  C1'  DT A  16      -1.417   1.909  44.870  8.00  0.00           C  
ATOM    497  N1   DT A  16      -0.032   1.517  44.750  9.00  0.00           N  
ATOM    498  C2   DT A  16       0.476   1.390  43.470  6.00  0.00           C  
ATOM    499  O2   DT A  16      -0.008   1.810  42.430  6.00  0.00           O  
ATOM    500  N3   DT A  16       1.747   0.810  43.380  4.00  0.00           N  
ATOM    501  C4   DT A  16       2.510   0.414  44.410  5.00  0.00           C  
ATOM    502  O4   DT A  16       3.661   0.025  44.170  4.00  0.00           O  
ATOM    503  C5   DT A  16       1.838   0.523  45.670  5.00  0.00           C  
ATOM    504  C6   DT A  16       0.647   1.021  45.820  1.00  0.00           C  
ATOM    505  C7   DT A  16       2.502   0.051  46.960  1.00  0.00           C  
ATOM    506  OP1  DT A  16      -1.858  -1.457  49.370  0.00  0.00           O  
ATOM    507  OP2  DT A  16      -4.352  -1.621  49.120  6.00  0.00           O1-
ATOM    508  H3   DT A  16       2.225   0.847  42.540  3.00  0.00           H  
ATOM    509  H6   DT A  16       0.274   1.034  46.820  6.00  0.00           H  
ATOM    510  H1'  DT A  16      -1.602   2.575  44.020  6.00  0.00           H  
ATOM    511  H2'  DT A  16      -1.873  -0.087  45.630  3.00  0.00           H  
ATOM    512  H3'  DT A  16      -4.094   0.483  46.090  3.00  0.00           H  
ATOM    513  H4'  DT A  16      -3.369   2.794  47.090  6.00  0.00           H  
ATOM    514  H5'  DT A  16      -1.474   0.755  47.750  6.00  0.00           H  
ATOM    515  H71  DT A  16       2.065   0.571  47.820  2.00  0.00           H  
ATOM    516  H72  DT A  16       2.340  -1.006  47.060  0.00  0.00           H  
ATOM    517  H73  DT A  16       3.612   0.372  46.940  3.00  0.00           H  
ATOM    518 H2''  DT A  16      -2.620   0.206  43.970  0.00  0.00           H  
ATOM    519 H5''  DT A  16      -1.876   2.106  48.790  2.00  0.00           H  
ATOM    520  P    DT A  17      -5.710   2.426  44.850  4.00  0.00           P  
ATOM    521  C5'  DT A  17      -7.786   1.081  43.900  5.00  0.00           C  
ATOM    522  O5'  DT A  17      -6.351   1.216  43.970  8.00  0.00           O  
ATOM    523  C4'  DT A  17      -8.118   0.178  42.740  0.00  0.00           C  
ATOM    524  O4'  DT A  17      -7.592  -1.090  42.960  4.00  0.00           O  
ATOM    525  C3'  DT A  17      -9.659  -0.142  42.790  7.00  0.00           C  
ATOM    526  O3'  DT A  17     -10.240   0.326  41.570  6.00  0.00           O  
ATOM    527  C2'  DT A  17      -9.632  -1.677  42.940  7.00  0.00           C  
ATOM    528  C1'  DT A  17      -8.384  -2.050  42.260  7.00  0.00           C  
ATOM    529  N1   DT A  17      -7.931  -3.448  42.430  6.00  0.00           N  
ATOM    530  C2   DT A  17      -7.979  -4.218  41.310  3.00  0.00           C  
ATOM    531  O2   DT A  17      -8.477  -3.789  40.290  5.00  0.00           O  
ATOM    532  N3   DT A  17      -7.491  -5.545  41.370  5.00  0.00           N  
ATOM    533  C4   DT A  17      -6.963  -6.039  42.550  3.00  0.00           C  
ATOM    534  O4   DT A  17      -6.628  -7.161  42.610  2.00  0.00           O  
ATOM    535  C5   DT A  17      -6.839  -5.175  43.680  4.00  0.00           C  
ATOM    536  C6   DT A  17      -7.457  -3.959  43.590  9.00  0.00           C  
ATOM    537  C7   DT A  17      -6.170  -5.503  45.000  5.00  0.00           C  
ATOM    538  OP1  DT A  17      -5.900   3.731  44.180  5.00  0.00           O  
ATOM    539  OP2  DT A  17      -6.081   2.275  46.320  1.00  0.00           O1-
ATOM    540  H3   DT A  17      -7.384  -6.079  40.550  6.00  0.00           H  
ATOM    541  H6   DT A  17      -7.481  -3.303  44.380  6.00  0.00           H  
ATOM    542  H1'  DT A  17      -8.387  -1.795  41.210  3.00  0.00           H  
ATOM    543  H2'  DT A  17      -9.563  -1.921  44.040  0.00  0.00           H  
ATOM    544  H3'  DT A  17     -10.147   0.319  43.680  0.00  0.00           H  
ATOM    545  H4'  DT A  17      -7.792   0.458  41.710  1.00  0.00           H  
ATOM    546  H5'  DT A  17      -8.259   2.003  43.690  1.00  0.00           H  
ATOM    547  H71  DT A  17      -6.575  -6.456  45.390  4.00  0.00           H  
ATOM    548  H72  DT A  17      -6.320  -4.708  45.710  5.00  0.00           H  
ATOM    549  H73  DT A  17      -5.060  -5.616  44.790  1.00  0.00           H  
ATOM    550 H2''  DT A  17     -10.486  -2.135  42.450  2.00  0.00           H  
ATOM    551 H5''  DT A  17      -8.275   0.586  44.780  3.00  0.00           H  
ATOM    552  P    DA A  18     -11.812   0.687  41.410  6.00  0.00           P  
ATOM    553  C5'  DA A  18     -11.641   1.477  38.790  7.00  0.00           C  
ATOM    554  O5'  DA A  18     -12.182   0.589  39.840  6.00  0.00           O  
ATOM    555  C4'  DA A  18     -11.662   0.902  37.270  7.00  0.00           C  
ATOM    556  O4'  DA A  18     -10.898  -0.286  37.110  4.00  0.00           O  
ATOM    557  C3'  DA A  18     -13.078   0.638  36.850  4.00  0.00           C  
ATOM    558  O3'  DA A  18     -13.516   1.408  35.750  5.00  0.00           O  
ATOM    559  C2'  DA A  18     -13.086  -0.810  36.360  9.00  0.00           C  
ATOM    560  C1'  DA A  18     -11.598  -1.003  36.120  9.00  0.00           C  
ATOM    561  N1   DA A  18     -12.519  -5.834  34.160  6.00  0.00           N  
ATOM    562  C2   DA A  18     -12.908  -4.621  33.760  2.00  0.00           C  
ATOM    563  N3   DA A  18     -12.616  -3.415  34.310  7.00  0.00           N  
ATOM    564  C4   DA A  18     -11.776  -3.500  35.410  0.00  0.00           C  
ATOM    565  C5   DA A  18     -11.309  -4.649  35.960  4.00  0.00           C  
ATOM    566  C6   DA A  18     -11.676  -5.812  35.230  1.00  0.00           C  
ATOM    567  N6   DA A  18     -11.327  -7.038  35.610  7.00  0.00           N  
ATOM    568  N7   DA A  18     -10.456  -4.361  37.040  2.00  0.00           N  
ATOM    569  C8   DA A  18     -10.458  -3.086  37.110  8.00  0.00           C  
ATOM    570  N9   DA A  18     -11.284  -2.474  36.210  6.00  0.00           N  
ATOM    571  OP1  DA A  18     -11.984   2.032  41.870  9.00  0.00           O  
ATOM    572  OP2  DA A  18     -12.581  -0.424  42.010  5.00  0.00           O1-
ATOM    573  H2   DA A  18     -13.703  -4.612  33.000  5.00  0.00           H  
ATOM    574  H8   DA A  18      -9.893  -2.466  37.780  1.00  0.00           H  
ATOM    575  H1'  DA A  18     -11.380  -0.569  35.180  7.00  0.00           H  
ATOM    576  H2'  DA A  18     -13.387  -1.539  37.130  0.00  0.00           H  
ATOM    577  H3'  DA A  18     -13.736   0.741  37.790  3.00  0.00           H  
ATOM    578  H4'  DA A  18     -11.238   1.664  36.560  3.00  0.00           H  
ATOM    579  H5'  DA A  18     -10.628   1.691  38.950  2.00  0.00           H  
ATOM    580  H61  DA A  18     -11.607  -7.790  35.010  5.00  0.00           H  
ATOM    581  H62  DA A  18     -10.435  -7.056  36.060  6.00  0.00           H  
ATOM    582 H2''  DA A  18     -13.679  -0.994  35.440  4.00  0.00           H  
ATOM    583 H5''  DA A  18     -12.063   2.452  38.960  0.00  0.00           H  
ATOM    584  P    DG A  19     -14.396   2.800  36.070  9.00  0.00           P  
ATOM    585  C5'  DG A  19     -12.271   4.425  36.180  3.00  0.00           C  
ATOM    586  O5'  DG A  19     -13.444   3.910  36.780  7.00  0.00           O  
ATOM    587  C4'  DG A  19     -11.422   5.042  37.340  4.00  0.00           C  
ATOM    588  O4'  DG A  19     -10.603   4.162  38.060  1.00  0.00           O  
ATOM    589  C3'  DG A  19     -10.539   6.181  36.800  8.00  0.00           C  
ATOM    590  O3'  DG A  19     -10.447   7.215  37.760  8.00  0.00           O  
ATOM    591  C2'  DG A  19      -9.257   5.304  36.630  3.00  0.00           C  
ATOM    592  C1'  DG A  19      -9.267   4.593  37.980  4.00  0.00           C  
ATOM    593  N1   DG A  19      -7.690  -0.050  36.560  9.00  0.00           N  
ATOM    594  C2   DG A  19      -8.451   0.867  35.820  5.00  0.00           C  
ATOM    595  N2   DG A  19      -8.860   0.635  34.610  3.00  0.00           N  
ATOM    596  N3   DG A  19      -8.604   2.087  36.260  6.00  0.00           N  
ATOM    597  C4   DG A  19      -8.016   2.384  37.480  7.00  0.00           C  
ATOM    598  C5   DG A  19      -7.290   1.558  38.280  1.00  0.00           C  
ATOM    599  C6   DG A  19      -7.039   0.187  37.790  1.00  0.00           C  
ATOM    600  O6   DG A  19      -6.398  -0.727  38.280  2.00  0.00           O  
ATOM    601  N7   DG A  19      -6.898   2.176  39.490  7.00  0.00           N  
ATOM    602  C8   DG A  19      -7.599   3.326  39.420  0.00  0.00           C  
ATOM    603  N9   DG A  19      -8.270   3.497  38.240  0.00  0.00           N  
ATOM    604  OP1  DG A  19     -15.547   2.455  36.900  4.00  0.00           O  
ATOM    605  OP2  DG A  19     -14.701   3.299  34.770  6.00  0.00           O1-
ATOM    606  H1   DG A  19      -7.697  -1.028  36.250  6.00  0.00           H  
ATOM    607  H8   DG A  19      -7.771   3.977  40.220  9.00  0.00           H  
ATOM    608  H1'  DG A  19      -9.212   5.324  38.780  3.00  0.00           H  
ATOM    609  H2'  DG A  19      -9.323   4.656  35.700  9.00  0.00           H  
ATOM    610  H21  DG A  19      -8.637  -0.321  34.250  7.00  0.00           H  
ATOM    611  H3'  DG A  19     -10.876   6.616  35.810  5.00  0.00           H  
ATOM    612  H22  DG A  19      -9.395   1.362  34.130  8.00  0.00           H  
ATOM    613  H4'  DG A  19     -12.171   5.644  37.910  7.00  0.00           H  
ATOM    614  H5'  DG A  19     -12.516   5.103  35.460  4.00  0.00           H  
ATOM    615 H2''  DG A  19      -8.356   5.888  36.370  8.00  0.00           H  
ATOM    616 H5''  DG A  19     -11.708   3.550  35.670  5.00  0.00           H  
ATOM    617  P    DG A  20      -9.559   8.484  37.500  2.00  0.00           P  
ATOM    618  C5'  DG A  20      -7.233   7.859  38.630  8.00  0.00           C  
ATOM    619  O5'  DG A  20      -8.054   7.932  37.460  2.00  0.00           O  
ATOM    620  C4'  DG A  20      -5.802   7.504  38.280  4.00  0.00           C  
ATOM    621  O4'  DG A  20      -5.702   6.084  37.990  4.00  0.00           O  
ATOM    622  C3'  DG A  20      -5.351   8.083  36.950  9.00  0.00           C  
ATOM    623  O3'  DG A  20      -4.837   9.464  37.030  1.00  0.00           O  
ATOM    624  C2'  DG A  20      -4.095   7.182  36.690  6.00  0.00           C  
ATOM    625  C1'  DG A  20      -4.521   5.855  37.290  8.00  0.00           C  
ATOM    626  N1   DG A  20      -3.946   0.843  36.940  8.00  0.00           N  
ATOM    627  C2   DG A  20      -3.630   1.716  37.980  4.00  0.00           C  
ATOM    628  N2   DG A  20      -2.957   1.312  38.990  6.00  0.00           N  
ATOM    629  N3   DG A  20      -3.804   2.992  37.890  8.00  0.00           N  
ATOM    630  C4   DG A  20      -4.546   3.386  36.810  4.00  0.00           C  
ATOM    631  C5   DG A  20      -4.779   2.612  35.690  3.00  0.00           C  
ATOM    632  C6   DG A  20      -4.493   1.257  35.730  7.00  0.00           C  
ATOM    633  O6   DG A  20      -4.628   0.399  34.850  2.00  0.00           O  
ATOM    634  N7   DG A  20      -5.232   3.370  34.640  5.00  0.00           N  
ATOM    635  C8   DG A  20      -5.212   4.595  35.100  3.00  0.00           C  
ATOM    636  N9   DG A  20      -4.716   4.693  36.410  1.00  0.00           N  
ATOM    637  OP1  DG A  20      -9.688   9.312  38.660  1.00  0.00           O  
ATOM    638  OP2  DG A  20      -9.926   9.063  36.200  4.00  0.00           O1-
ATOM    639  H1   DG A  20      -3.587  -0.098  36.990  9.00  0.00           H  
ATOM    640  H8   DG A  20      -5.472   5.471  34.530  2.00  0.00           H  
ATOM    641  H1'  DG A  20      -3.753   5.599  38.010  6.00  0.00           H  
ATOM    642  H2'  DG A  20      -3.912   7.125  35.610  2.00  0.00           H  
ATOM    643  H21  DG A  20      -2.711   0.390  39.190  4.00  0.00           H  
ATOM    644  H3'  DG A  20      -6.172   7.923  36.180  7.00  0.00           H  
ATOM    645  H22  DG A  20      -2.652   2.077  39.530  0.00  0.00           H  
ATOM    646  H4'  DG A  20      -5.207   7.827  39.120  1.00  0.00           H  
ATOM    647  H5'  DG A  20      -7.665   7.089  39.200  1.00  0.00           H  
ATOM    648 H2''  DG A  20      -3.202   7.564  37.120  3.00  0.00           H  
ATOM    649 H5''  DG A  20      -7.329   8.787  39.160  2.00  0.00           H  
ATOM    650  P    DG A  21      -5.101  10.508  35.810  5.00  0.00           P  
ATOM    651  C5'  DG A  21      -2.493  10.916  35.310  3.00  0.00           C  
ATOM    652  O5'  DG A  21      -3.808  10.212  35.030  5.00  0.00           O  
ATOM    653  C4'  DG A  21      -1.293  10.441  34.410  4.00  0.00           C  
ATOM    654  O4'  DG A  21      -0.710   9.185  34.870  3.00  0.00           O  
ATOM    655  C3'  DG A  21      -1.588  10.190  32.890  2.00  0.00           C  
ATOM    656  O3'  DG A  21      -0.460  10.465  32.060  3.00  0.00           O  
ATOM    657  C2'  DG A  21      -1.845   8.679  32.950  6.00  0.00           C  
ATOM    658  C1'  DG A  21      -0.795   8.165  33.920  3.00  0.00           C  
ATOM    659  N1   DG A  21      -1.827   3.200  32.720  9.00  0.00           N  
ATOM    660  C2   DG A  21      -1.833   4.299  31.920  6.00  0.00           C  
ATOM    661  N2   DG A  21      -2.101   4.204  30.630  9.00  0.00           N  
ATOM    662  N3   DG A  21      -1.436   5.485  32.330  1.00  0.00           N  
ATOM    663  C4   DG A  21      -1.246   5.633  33.710  4.00  0.00           C  
ATOM    664  C5   DG A  21      -1.167   4.572  34.550  2.00  0.00           C  
ATOM    665  C6   DG A  21      -1.445   3.205  34.050  6.00  0.00           C  
ATOM    666  O6   DG A  21      -1.450   2.146  34.680  1.00  0.00           O  
ATOM    667  N7   DG A  21      -0.879   4.997  35.830  3.00  0.00           N  
ATOM    668  C8   DG A  21      -0.852   6.321  35.690  4.00  0.00           C  
ATOM    669  N9   DG A  21      -0.972   6.776  34.420  1.00  0.00           N  
ATOM    670  OP1  DG A  21      -4.882  11.824  36.390  6.00  0.00           O  
ATOM    671  OP2  DG A  21      -6.295  10.139  35.030  0.00  0.00           O1-
ATOM    672  H1   DG A  21      -2.237   2.340  32.430  0.00  0.00           H  
ATOM    673  H8   DG A  21      -0.740   6.953  36.540  1.00  0.00           H  
ATOM    674  H1'  DG A  21       0.138   8.152  33.280  8.00  0.00           H  
ATOM    675  H2'  DG A  21      -2.738   8.435  33.410  7.00  0.00           H  
ATOM    676  H21  DG A  21      -1.855   3.319  30.170  5.00  0.00           H  
ATOM    677  H3'  DG A  21      -2.451  10.769  32.590  6.00  0.00           H  
ATOM    678  H22  DG A  21      -2.058   5.054  30.040  6.00  0.00           H  
ATOM    679  H4'  DG A  21      -0.527  11.209  34.380  8.00  0.00           H  
ATOM    680  H5'  DG A  21      -2.241  10.810  36.350  1.00  0.00           H  
ATOM    681 H2''  DG A  21      -1.659   8.116  32.040  8.00  0.00           H  
ATOM    682 H5''  DG A  21      -2.694  11.957  35.070  6.00  0.00           H  
ATOM    683  P    DT A  22      -0.512  10.627  30.440  9.00  0.00           P  
ATOM    684  C5'  DT A  22       0.341   8.100  30.370  0.00  0.00           C  
ATOM    685  O5'  DT A  22      -0.469   9.149  29.820  8.00  0.00           O  
ATOM    686  C4'  DT A  22       1.469   7.630  29.410  9.00  0.00           C  
ATOM    687  O4'  DT A  22       2.374   6.709  29.960  7.00  0.00           O  
ATOM    688  C3'  DT A  22       0.955   6.870  28.260  8.00  0.00           C  
ATOM    689  O3'  DT A  22       1.885   7.167  27.300  8.00  0.00           O  
ATOM    690  C2'  DT A  22       0.951   5.390  28.700  6.00  0.00           C  
ATOM    691  C1'  DT A  22       2.332   5.401  29.290  9.00  0.00           C  
ATOM    692  N1   DT A  22       2.667   4.223  30.240  9.00  0.00           N  
ATOM    693  C2   DT A  22       3.607   3.254  29.830  9.00  0.00           C  
ATOM    694  O2   DT A  22       4.299   3.234  28.830  4.00  0.00           O  
ATOM    695  N3   DT A  22       3.829   2.197  30.680  4.00  0.00           N  
ATOM    696  C4   DT A  22       3.340   2.128  31.980  8.00  0.00           C  
ATOM    697  O4   DT A  22       3.742   1.230  32.700  1.00  0.00           O  
ATOM    698  C5   DT A  22       2.539   3.298  32.440  5.00  0.00           C  
ATOM    699  C6   DT A  22       2.192   4.254  31.530  8.00  0.00           C  
ATOM    700  C7   DT A  22       2.061   3.548  33.870  8.00  0.00           C  
ATOM    701  OP1  DT A  22       0.727  11.250  29.930  3.00  0.00           O  
ATOM    702  OP2  DT A  22      -1.725  11.325  30.100  2.00  0.00           O1-
ATOM    703  H3   DT A  22       4.274   1.409  30.200  8.00  0.00           H  
ATOM    704  H6   DT A  22       1.675   5.113  31.890  1.00  0.00           H  
ATOM    705  H1'  DT A  22       3.099   5.485  28.510  6.00  0.00           H  
ATOM    706  H2'  DT A  22       0.242   5.165  29.470  1.00  0.00           H  
ATOM    707  H3'  DT A  22      -0.023   7.248  27.970  8.00  0.00           H  
ATOM    708  H4'  DT A  22       1.857   8.521  29.010  1.00  0.00           H  
ATOM    709  H5'  DT A  22      -0.319   7.217  30.530  5.00  0.00           H  
ATOM    710  H71  DT A  22       1.499   2.689  34.110  1.00  0.00           H  
ATOM    711  H72  DT A  22       2.932   3.482  34.510  0.00  0.00           H  
ATOM    712  H73  DT A  22       1.552   4.529  34.040  7.00  0.00           H  
ATOM    713 H2''  DT A  22       0.843   4.816  27.830  9.00  0.00           H  
ATOM    714 H5''  DT A  22       0.708   8.470  31.280  1.00  0.00           H  
ATOM    715  P    DT A  23       1.696   6.826  25.680  5.00  0.00           P  
ATOM    716  C5'  DT A  23       3.598   5.066  25.830  7.00  0.00           C  
ATOM    717  O5'  DT A  23       2.305   5.343  25.430  2.00  0.00           O  
ATOM    718  C4'  DT A  23       3.980   3.891  24.950  5.00  0.00           C  
ATOM    719  O4'  DT A  23       5.400   3.651  25.140  1.00  0.00           O  
ATOM    720  C3'  DT A  23       3.267   2.537  25.010  4.00  0.00           C  
ATOM    721  O3'  DT A  23       3.151   2.116  23.660  3.00  0.00           O  
ATOM    722  C2'  DT A  23       4.284   1.739  25.730  3.00  0.00           C  
ATOM    723  C1'  DT A  23       5.560   2.258  25.110  8.00  0.00           C  
ATOM    724  N1   DT A  23       6.825   1.688  25.710  4.00  0.00           N  
ATOM    725  C2   DT A  23       7.854   1.301  24.790  7.00  0.00           C  
ATOM    726  O2   DT A  23       7.724   1.401  23.580  1.00  0.00           O  
ATOM    727  N3   DT A  23       8.988   0.837  25.370  6.00  0.00           N  
ATOM    728  C4   DT A  23       9.149   0.415  26.690  9.00  0.00           C  
ATOM    729  O4   DT A  23      10.064  -0.350  27.010  8.00  0.00           O  
ATOM    730  C5   DT A  23       8.049   0.802  27.590  6.00  0.00           C  
ATOM    731  C6   DT A  23       6.930   1.397  27.060  7.00  0.00           C  
ATOM    732  C7   DT A  23       8.072   0.515  29.070  3.00  0.00           C  
ATOM    733  OP1  DT A  23       2.394   7.813  24.880  3.00  0.00           O  
ATOM    734  OP2  DT A  23       0.220   6.740  25.350  7.00  0.00           O1-
ATOM    735  H3   DT A  23       9.724   0.653  24.680  8.00  0.00           H  
ATOM    736  H6   DT A  23       6.115   1.460  27.810  6.00  0.00           H  
ATOM    737  H1'  DT A  23       5.612   2.037  23.970  8.00  0.00           H  
ATOM    738  H2'  DT A  23       4.218   2.099  26.760  1.00  0.00           H  
ATOM    739  H3'  DT A  23       2.253   2.672  25.450  3.00  0.00           H  
ATOM    740  H4'  DT A  23       3.943   4.224  23.880  8.00  0.00           H  
ATOM    741  H5'  DT A  23       3.676   4.689  26.830  1.00  0.00           H  
ATOM    742  H71  DT A  23       7.993  -0.497  29.370  8.00  0.00           H  
ATOM    743  H72  DT A  23       9.103   0.734  29.420  4.00  0.00           H  
ATOM    744  H73  DT A  23       7.403   1.121  29.620  8.00  0.00           H  
ATOM    745 H2''  DT A  23       4.050   0.680  25.660  7.00  0.00           H  
ATOM    746 H5''  DT A  23       4.306   5.937  25.790  5.00  0.00           H  
ATOM    747  P    DA A  24       1.830   1.545  23.140  7.00  0.00           P  
ATOM    748  C5'  DA A  24       2.474  -1.098  23.700  3.00  0.00           C  
ATOM    749  O5'  DA A  24       1.672   0.071  23.900  7.00  0.00           O  
ATOM    750  C4'  DA A  24       1.952  -2.295  24.520  9.00  0.00           C  
ATOM    751  O4'  DA A  24       2.140  -1.953  25.880  9.00  0.00           O  
ATOM    752  C3'  DA A  24       0.420  -2.655  24.220  2.00  0.00           C  
ATOM    753  O3'  DA A  24       0.221  -4.078  24.360  1.00  0.00           O  
ATOM    754  C2'  DA A  24      -0.141  -1.883  25.420  4.00  0.00           C  
ATOM    755  C1'  DA A  24       0.868  -2.164  26.480  3.00  0.00           C  
ATOM    756  N1   DA A  24      -0.007   2.276  28.920  0.00  0.00           N  
ATOM    757  C2   DA A  24       0.054   1.960  27.630  4.00  0.00           C  
ATOM    758  N3   DA A  24       0.354   0.765  27.150  1.00  0.00           N  
ATOM    759  C4   DA A  24       0.537  -0.218  28.060  1.00  0.00           C  
ATOM    760  C5   DA A  24       0.481  -0.076  29.410  1.00  0.00           C  
ATOM    761  C6   DA A  24       0.257   1.268  29.790  9.00  0.00           C  
ATOM    762  N6   DA A  24       0.270   1.572  31.080  8.00  0.00           N  
ATOM    763  N7   DA A  24       0.678  -1.284  30.040  8.00  0.00           N  
ATOM    764  C8   DA A  24       0.748  -2.113  29.040  7.00  0.00           C  
ATOM    765  N9   DA A  24       0.759  -1.523  27.810  6.00  0.00           N  
ATOM    766  OP1  DA A  24       1.974   1.381  21.710  8.00  0.00           O  
ATOM    767  OP2  DA A  24       0.750   2.392  23.670  1.00  0.00           O1-
ATOM    768  H2   DA A  24      -0.173   2.654  26.820  5.00  0.00           H  
ATOM    769  H8   DA A  24       0.946  -3.187  29.170  9.00  0.00           H  
ATOM    770  H1'  DA A  24       0.752  -3.278  26.730  2.00  0.00           H  
ATOM    771  H2'  DA A  24      -0.172  -0.797  25.270  5.00  0.00           H  
ATOM    772  H3'  DA A  24       0.010  -2.269  23.250  3.00  0.00           H  
ATOM    773  H4'  DA A  24       2.557  -3.190  24.340  7.00  0.00           H  
ATOM    774  H5'  DA A  24       3.508  -0.991  24.180  3.00  0.00           H  
ATOM    775  H61  DA A  24       0.105   2.561  31.320  7.00  0.00           H  
ATOM    776  H62  DA A  24       0.553   0.846  31.710  6.00  0.00           H  
ATOM    777 H2''  DA A  24      -1.199  -2.245  25.730  8.00  0.00           H  
ATOM    778 H5''  DA A  24       2.407  -1.411  22.630  7.00  0.00           H  
ATOM    779  P    DG A  25      -1.217  -4.887  24.410  3.00  0.00           P  
ATOM    780  C5'  DG A  25      -0.721  -5.747  26.880  0.00  0.00           C  
ATOM    781  O5'  DG A  25      -1.560  -4.944  25.980  2.00  0.00           O  
ATOM    782  C4'  DG A  25      -1.323  -5.926  28.300  4.00  0.00           C  
ATOM    783  O4'  DG A  25      -1.160  -4.759  29.100  0.00  0.00           O  
ATOM    784  C3'  DG A  25      -2.761  -6.337  28.220  7.00  0.00           C  
ATOM    785  O3'  DG A  25      -3.050  -7.325  29.230  5.00  0.00           O  
ATOM    786  C2'  DG A  25      -3.365  -4.985  28.540  7.00  0.00           C  
ATOM    787  C1'  DG A  25      -2.473  -4.373  29.540  4.00  0.00           C  
ATOM    788  N1   DG A  25      -2.592  -0.419  32.700  7.00  0.00           N  
ATOM    789  C2   DG A  25      -2.196  -1.677  32.970  2.00  0.00           C  
ATOM    790  N2   DG A  25      -2.015  -2.062  34.180  5.00  0.00           N  
ATOM    791  N3   DG A  25      -2.136  -2.654  32.040  0.00  0.00           N  
ATOM    792  C4   DG A  25      -2.463  -2.143  30.810  1.00  0.00           C  
ATOM    793  C5   DG A  25      -2.690  -0.840  30.390  9.00  0.00           C  
ATOM    794  C6   DG A  25      -2.796   0.089  31.460  2.00  0.00           C  
ATOM    795  O6   DG A  25      -3.066   1.262  31.430  3.00  0.00           O  
ATOM    796  N7   DG A  25      -2.961  -0.753  29.040  7.00  0.00           N  
ATOM    797  C8   DG A  25      -2.867  -1.969  28.670  6.00  0.00           C  
ATOM    798  N9   DG A  25      -2.522  -2.908  29.670  4.00  0.00           N  
ATOM    799  OP1  DG A  25      -1.017  -6.249  23.900  6.00  0.00           O  
ATOM    800  OP2  DG A  25      -2.171  -4.061  23.660  9.00  0.00           O1-
ATOM    801  H1   DG A  25      -2.657   0.121  33.510  2.00  0.00           H  
ATOM    802  H8   DG A  25      -2.947  -2.227  27.590  4.00  0.00           H  
ATOM    803  H1'  DG A  25      -2.676  -4.887  30.460  6.00  0.00           H  
ATOM    804  H2'  DG A  25      -3.333  -4.397  27.650  4.00  0.00           H  
ATOM    805  H21  DG A  25      -2.174  -1.423  34.960  7.00  0.00           H  
ATOM    806  H3'  DG A  25      -2.963  -6.677  27.240  0.00  0.00           H  
ATOM    807  H22  DG A  25      -1.746  -3.064  34.330  1.00  0.00           H  
ATOM    808  H4'  DG A  25      -0.779  -6.793  28.680  6.00  0.00           H  
ATOM    809  H5'  DG A  25       0.308  -5.398  26.950  2.00  0.00           H  
ATOM    810 H2''  DG A  25      -4.371  -5.055  28.920  1.00  0.00           H  
ATOM    811 H5''  DG A  25      -0.813  -6.727  26.420  0.00  0.00           H  
ATOM    812  P    DG A  26      -4.030  -8.520  28.860  5.00  0.00           P  
ATOM    813  C5'  DG A  26      -2.537 -10.610  29.610  2.00  0.00           C  
ATOM    814  O5'  DG A  26      -3.683  -9.671  29.840  4.00  0.00           O  
ATOM    815  C4'  DG A  26      -2.312 -11.495  30.820  9.00  0.00           C  
ATOM    816  O4'  DG A  26      -1.842 -10.652  31.840  6.00  0.00           O  
ATOM    817  C3'  DG A  26      -3.549 -12.322  31.320  8.00  0.00           C  
ATOM    818  O3'  DG A  26      -3.146 -13.501  32.080  3.00  0.00           O  
ATOM    819  C2'  DG A  26      -3.990 -11.211  32.410  8.00  0.00           C  
ATOM    820  C1'  DG A  26      -2.671 -10.811  33.010  1.00  0.00           C  
ATOM    821  N1   DG A  26      -3.622  -5.678  33.270  3.00  0.00           N  
ATOM    822  C2   DG A  26      -4.153  -6.599  32.470  4.00  0.00           C  
ATOM    823  N2   DG A  26      -4.858  -6.176  31.460  4.00  0.00           N  
ATOM    824  N3   DG A  26      -3.864  -7.866  32.500  1.00  0.00           N  
ATOM    825  C4   DG A  26      -3.072  -8.237  33.460  3.00  0.00           C  
ATOM    826  C5   DG A  26      -2.555  -7.408  34.370  4.00  0.00           C  
ATOM    827  C6   DG A  26      -2.646  -6.002  34.160  7.00  0.00           C  
ATOM    828  O6   DG A  26      -2.105  -5.092  34.760  5.00  0.00           O  
ATOM    829  N7   DG A  26      -1.944  -8.104  35.480  1.00  0.00           N  
ATOM    830  C8   DG A  26      -1.849  -9.305  34.960  0.00  0.00           C  
ATOM    831  N9   DG A  26      -2.590  -9.534  33.800  8.00  0.00           N  
ATOM    832  OP1  DG A  26      -3.825  -8.970  27.440  9.00  0.00           O  
ATOM    833  OP2  DG A  26      -5.325  -8.186  29.310  6.00  0.00           O1-
ATOM    834  H1   DG A  26      -3.953  -4.695  33.200  1.00  0.00           H  
ATOM    835  H8   DG A  26      -1.508 -10.153  35.470  1.00  0.00           H  
ATOM    836  H1'  DG A  26      -2.302 -11.660  33.500  4.00  0.00           H  
ATOM    837  H2'  DG A  26      -4.637 -10.414  31.960  9.00  0.00           H  
ATOM    838  H21  DG A  26      -5.103  -5.184  31.370  2.00  0.00           H  
ATOM    839  H3'  DG A  26      -4.292 -12.411  30.610  2.00  0.00           H  
ATOM    840  H22  DG A  26      -5.178  -6.904  30.780  7.00  0.00           H  
ATOM    841  H4'  DG A  26      -1.587 -12.240  30.550  5.00  0.00           H  
ATOM    842  H5'  DG A  26      -1.571 -10.035  29.490  9.00  0.00           H  
ATOM    843 H2''  DG A  26      -4.678 -11.637  33.190  3.00  0.00           H  
ATOM    844 H5''  DG A  26      -2.750 -11.196  28.750  4.00  0.00           H  
ATOM    845  P    DG A  27      -4.174 -14.453  32.800  6.00  0.00           P  
ATOM    846  C5'  DG A  27      -2.793 -14.167  35.040  2.00  0.00           C  
ATOM    847  O5'  DG A  27      -4.000 -14.031  34.330  0.00  0.00           O  
ATOM    848  C4'  DG A  27      -2.801 -13.616  36.430  5.00  0.00           C  
ATOM    849  O4'  DG A  27      -2.944 -12.257  36.540  0.00  0.00           O  
ATOM    850  C3'  DG A  27      -3.939 -14.229  37.280  9.00  0.00           C  
ATOM    851  O3'  DG A  27      -3.512 -14.555  38.580  5.00  0.00           O  
ATOM    852  C2'  DG A  27      -4.919 -13.054  37.420  4.00  0.00           C  
ATOM    853  C1'  DG A  27      -4.033 -11.901  37.310  3.00  0.00           C  
ATOM    854  N1   DG A  27      -4.714  -6.811  37.670  0.00  0.00           N  
ATOM    855  C2   DG A  27      -4.274  -7.664  38.640  1.00  0.00           C  
ATOM    856  N2   DG A  27      -3.861  -7.229  39.790  6.00  0.00           N  
ATOM    857  N3   DG A  27      -4.098  -8.985  38.460  2.00  0.00           N  
ATOM    858  C4   DG A  27      -4.592  -9.407  37.230  5.00  0.00           C  
ATOM    859  C5   DG A  27      -5.224  -8.608  36.320  6.00  0.00           C  
ATOM    860  C6   DG A  27      -5.298  -7.162  36.530  6.00  0.00           C  
ATOM    861  O6   DG A  27      -5.947  -6.298  35.990  2.00  0.00           O  
ATOM    862  N7   DG A  27      -5.701  -9.398  35.250  7.00  0.00           N  
ATOM    863  C8   DG A  27      -5.459 -10.623  35.590  4.00  0.00           C  
ATOM    864  N9   DG A  27      -4.714 -10.694  36.750  4.00  0.00           N  
ATOM    865  OP1  DG A  27      -3.581 -15.766  32.600  9.00  0.00           O  
ATOM    866  OP2  DG A  27      -5.562 -14.167  32.370  9.00  0.00           O1-
ATOM    867  H1   DG A  27      -4.760  -5.869  37.930  7.00  0.00           H  
ATOM    868  H8   DG A  27      -5.914 -11.458  35.120  8.00  0.00           H  
ATOM    869  H1'  DG A  27      -3.660 -11.737  38.280  0.00  0.00           H  
ATOM    870  H2'  DG A  27      -5.524 -13.059  36.510  4.00  0.00           H  
ATOM    871  H21  DG A  27      -3.770  -6.231  39.960  1.00  0.00           H  
ATOM    872  H3'  DG A  27      -4.332 -15.119  36.750  1.00  0.00           H  
ATOM    873  H22  DG A  27      -3.469  -7.857  40.480  5.00  0.00           H  
ATOM    874  H4'  DG A  27      -1.916 -13.935  36.880  7.00  0.00           H  
ATOM    875  H5'  DG A  27      -2.061 -13.601  34.420  7.00  0.00           H  
ATOM    876 H2''  DG A  27      -5.466 -13.022  38.380  8.00  0.00           H  
ATOM    877 H5''  DG A  27      -2.467 -15.152  35.100  3.00  0.00           H  
ATOM    878  P    DT A  28      -4.041 -15.814  39.300  7.00  0.00           P  
ATOM    879  C5'  DT A  28      -6.226 -16.229  40.770  0.00  0.00           C  
ATOM    880  O5'  DT A  28      -5.456 -15.417  39.730  8.00  0.00           O  
ATOM    881  C4'  DT A  28      -7.130 -15.426  41.720  4.00  0.00           C  
ATOM    882  O4'  DT A  28      -6.286 -14.416  42.360  4.00  0.00           O  
ATOM    883  C3'  DT A  28      -8.245 -14.644  40.970  7.00  0.00           C  
ATOM    884  O3'  DT A  28      -9.363 -14.511  41.810  6.00  0.00           O  
ATOM    885  C2'  DT A  28      -7.571 -13.334  40.980  6.00  0.00           C  
ATOM    886  C1'  DT A  28      -6.817 -13.172  42.270  3.00  0.00           C  
ATOM    887  N1   DT A  28      -5.758 -12.099  42.210  4.00  0.00           N  
ATOM    888  C2   DT A  28      -5.985 -10.899  42.900  2.00  0.00           C  
ATOM    889  O2   DT A  28      -6.957 -10.657  43.620  4.00  0.00           O  
ATOM    890  N3   DT A  28      -5.093  -9.842  42.830  0.00  0.00           N  
ATOM    891  C4   DT A  28      -3.881  -9.892  42.200  6.00  0.00           C  
ATOM    892  O4   DT A  28      -3.071  -8.901  42.250  0.00  0.00           O  
ATOM    893  C5   DT A  28      -3.687 -11.213  41.520  5.00  0.00           C  
ATOM    894  C6   DT A  28      -4.527 -12.192  41.560  1.00  0.00           C  
ATOM    895  C7   DT A  28      -2.333 -11.510  40.830  1.00  0.00           C  
ATOM    896  OP1  DT A  28      -3.265 -16.065  40.560  5.00  0.00           O  
ATOM    897  OP2  DT A  28      -4.247 -16.906  38.340  1.00  0.00           O1-
ATOM    898  H3   DT A  28      -5.395  -8.962  43.200  4.00  0.00           H  
ATOM    899  H6   DT A  28      -4.295 -13.195  41.190  9.00  0.00           H  
ATOM    900  H1'  DT A  28      -7.501 -13.027  43.090  0.00  0.00           H  
ATOM    901  H2'  DT A  28      -6.833 -13.267  40.170  2.00  0.00           H  
ATOM    902  H3'  DT A  28      -8.484 -14.996  39.940  1.00  0.00           H  
ATOM    903  H4'  DT A  28      -7.537 -16.124  42.520  3.00  0.00           H  
ATOM    904  H5'  DT A  28      -5.536 -16.798  41.440  0.00  0.00           H  
ATOM    905  H71  DT A  28      -2.421 -10.830  39.950  4.00  0.00           H  
ATOM    906  H72  DT A  28      -1.503 -11.272  41.440  1.00  0.00           H  
ATOM    907  H73  DT A  28      -2.325 -12.564  40.490  1.00  0.00           H  
ATOM    908 H2''  DT A  28      -8.267 -12.535  40.800  5.00  0.00           H  
ATOM    909 H5''  DT A  28      -6.785 -16.986  40.210  3.00  0.00           H  
ATOM    910  P    DT A  29     -10.744 -15.295  41.620  4.00  0.00           P  
ATOM    911  C5'  DT A  29     -12.585 -14.715  39.890  0.00  0.00           C  
ATOM    912  O5'  DT A  29     -11.307 -14.404  40.460  0.00  0.00           O  
ATOM    913  C4'  DT A  29     -13.120 -13.790  38.860  5.00  0.00           C  
ATOM    914  O4'  DT A  29     -13.276 -12.415  39.340  3.00  0.00           O  
ATOM    915  C3'  DT A  29     -12.186 -13.656  37.640  6.00  0.00           C  
ATOM    916  O3'  DT A  29     -13.000 -13.613  36.460  1.00  0.00           O  
ATOM    917  C2'  DT A  29     -11.478 -12.366  37.910  4.00  0.00           C  
ATOM    918  C1'  DT A  29     -12.646 -11.517  38.410  0.00  0.00           C  
ATOM    919  N1   DT A  29     -12.215 -10.225  38.970  8.00  0.00           N  
ATOM    920  C2   DT A  29     -12.324  -9.060  38.220  9.00  0.00           C  
ATOM    921  O2   DT A  29     -12.983  -8.925  37.200  9.00  0.00           O  
ATOM    922  N3   DT A  29     -11.508  -7.980  38.580  1.00  0.00           N  
ATOM    923  C4   DT A  29     -10.814  -7.802  39.720  0.00  0.00           C  
ATOM    924  O4   DT A  29     -10.367  -6.671  40.000  6.00  0.00           O  
ATOM    925  C5   DT A  29     -10.739  -9.018  40.500  1.00  0.00           C  
ATOM    926  C6   DT A  29     -11.383 -10.148  40.120  9.00  0.00           C  
ATOM    927  C7   DT A  29      -9.822  -9.035  41.600  8.00  0.00           C  
ATOM    928  OP1  DT A  29     -11.495 -14.956  42.790  3.00  0.00           O  
ATOM    929  OP2  DT A  29     -10.647 -16.710  41.310  4.00  0.00           O1-
ATOM    930  H3   DT A  29     -11.300  -7.311  37.880  4.00  0.00           H  
ATOM    931  H6   DT A  29     -11.410 -10.952  40.840  6.00  0.00           H  
ATOM    932  H1'  DT A  29     -13.314 -11.292  37.590  7.00  0.00           H  
ATOM    933  H2'  DT A  29     -10.692 -12.450  38.680  5.00  0.00           H  
ATOM    934  H3'  DT A  29     -11.400 -14.408  37.570  8.00  0.00           H  
ATOM    935  H4'  DT A  29     -14.052 -14.179  38.530  2.00  0.00           H  
ATOM    936  H5'  DT A  29     -13.373 -14.788  40.670  0.00  0.00           H  
ATOM    937  H71  DT A  29     -10.426  -8.687  42.430  2.00  0.00           H  
ATOM    938  H72  DT A  29      -9.510 -10.067  41.870  5.00  0.00           H  
ATOM    939  H73  DT A  29      -9.080  -8.262  41.340  1.00  0.00           H  
ATOM    940 H2''  DT A  29     -10.980 -11.978  36.970  9.00  0.00           H  
ATOM    941 H5''  DT A  29     -12.534 -15.710  39.490  4.00  0.00           H  
ATOM    942  P    DA A  30     -12.395 -13.928  34.970  9.00  0.00           P  
ATOM    943  C5'  DA A  30     -12.464 -11.482  33.990  9.00  0.00           C  
ATOM    944  O5'  DA A  30     -11.669 -12.597  34.450  1.00  0.00           O  
ATOM    945  C4'  DA A  30     -11.599 -10.220  33.800  9.00  0.00           C  
ATOM    946  O4'  DA A  30     -10.972  -9.876  35.070  0.00  0.00           O  
ATOM    947  C3'  DA A  30     -10.435 -10.439  32.830  7.00  0.00           C  
ATOM    948  O3'  DA A  30     -10.189  -9.348  31.990  8.00  0.00           O  
ATOM    949  C2'  DA A  30      -9.242 -10.579  33.720  8.00  0.00           C  
ATOM    950  C1'  DA A  30      -9.553  -9.632  34.930  7.00  0.00           C  
ATOM    951  N1   DA A  30      -7.395  -7.452  39.040  7.00  0.00           N  
ATOM    952  C2   DA A  30      -8.180  -6.906  38.120  8.00  0.00           C  
ATOM    953  N3   DA A  30      -8.747  -7.588  37.090  0.00  0.00           N  
ATOM    954  C4   DA A  30      -8.486  -8.990  37.150  0.00  0.00           C  
ATOM    955  C5   DA A  30      -7.780  -9.644  38.130  5.00  0.00           C  
ATOM    956  C6   DA A  30      -7.288  -8.805  39.140  2.00  0.00           C  
ATOM    957  N6   DA A  30      -6.667  -9.084  40.300  8.00  0.00           N  
ATOM    958  N7   DA A  30      -7.811 -11.050  37.880  9.00  0.00           N  
ATOM    959  C8   DA A  30      -8.483 -11.128  36.740  3.00  0.00           C  
ATOM    960  N9   DA A  30      -8.823  -9.938  36.190  5.00  0.00           N  
ATOM    961  OP1  DA A  30     -13.496 -14.259  34.100  8.00  0.00           O  
ATOM    962  OP2  DA A  30     -11.340 -14.903  35.090  5.00  0.00           O1-
ATOM    963  H2   DA A  30      -8.209  -5.815  38.130  2.00  0.00           H  
ATOM    964  H8   DA A  30      -8.733 -12.108  36.230  6.00  0.00           H  
ATOM    965  H1'  DA A  30      -9.277  -8.590  34.650  9.00  0.00           H  
ATOM    966  H2'  DA A  30      -9.025 -11.588  34.150  0.00  0.00           H  
ATOM    967  H3'  DA A  30     -10.664 -11.347  32.310  9.00  0.00           H  
ATOM    968  H4'  DA A  30     -12.181  -9.385  33.520  4.00  0.00           H  
ATOM    969  H5'  DA A  30     -13.299 -11.227  34.720  5.00  0.00           H  
ATOM    970  H61  DA A  30      -6.187  -8.314  40.830  7.00  0.00           H  
ATOM    971  H62  DA A  30      -6.223 -10.022  40.430  4.00  0.00           H  
ATOM    972 H2''  DA A  30      -8.318 -10.217  33.310  0.00  0.00           H  
ATOM    973 H5''  DA A  30     -12.839 -11.717  33.000  7.00  0.00           H  
ATOM    974  P    DG A  31     -10.614  -9.402  30.450  8.00  0.00           P  
ATOM    975  C5'  DG A  31     -11.831  -7.060  30.840  3.00  0.00           C  
ATOM    976  O5'  DG A  31     -10.882  -7.809  30.120  1.00  0.00           O  
ATOM    977  C4'  DG A  31     -12.330  -5.868  30.040  4.00  0.00           C  
ATOM    978  O4'  DG A  31     -12.242  -4.782  30.990  3.00  0.00           O  
ATOM    979  C3'  DG A  31     -11.542  -5.436  28.810  8.00  0.00           C  
ATOM    980  O3'  DG A  31     -12.377  -4.633  27.990  1.00  0.00           O  
ATOM    981  C2'  DG A  31     -10.461  -4.587  29.510  9.00  0.00           C  
ATOM    982  C1'  DG A  31     -11.245  -3.816  30.620  7.00  0.00           C  
ATOM    983  N1   DG A  31      -7.833  -4.573  34.490  4.00  0.00           N  
ATOM    984  C2   DG A  31      -8.264  -5.456  33.580  7.00  0.00           C  
ATOM    985  N2   DG A  31      -8.041  -6.737  33.800  0.00  0.00           N  
ATOM    986  N3   DG A  31      -9.244  -5.212  32.700  2.00  0.00           N  
ATOM    987  C4   DG A  31      -9.602  -3.882  32.610  0.00  0.00           C  
ATOM    988  C5   DG A  31      -9.110  -2.852  33.370  6.00  0.00           C  
ATOM    989  C6   DG A  31      -8.268  -3.233  34.460  3.00  0.00           C  
ATOM    990  O6   DG A  31      -7.840  -2.556  35.360  3.00  0.00           O  
ATOM    991  N7   DG A  31      -9.613  -1.625  32.990  4.00  0.00           N  
ATOM    992  C8   DG A  31     -10.372  -1.918  31.990  0.00  0.00           C  
ATOM    993  N9   DG A  31     -10.424  -3.240  31.680  9.00  0.00           N  
ATOM    994  OP1  DG A  31     -11.845 -10.168  30.280  5.00  0.00           O  
ATOM    995  OP2  DG A  31      -9.423  -9.782  29.680  9.00  0.00           O1-
ATOM    996  H1   DG A  31      -7.273  -4.884  35.210  5.00  0.00           H  
ATOM    997  H8   DG A  31     -11.015  -1.225  31.470  3.00  0.00           H  
ATOM    998  H1'  DG A  31     -11.825  -2.971  30.190  3.00  0.00           H  
ATOM    999  H2'  DG A  31      -9.843  -5.281  29.920  9.00  0.00           H  
ATOM   1000  H21  DG A  31      -7.372  -7.099  34.460  5.00  0.00           H  
ATOM   1001  H3'  DG A  31     -11.092  -6.198  28.270  3.00  0.00           H  
ATOM   1002  H22  DG A  31      -8.570  -7.249  33.120  5.00  0.00           H  
ATOM   1003  H4'  DG A  31     -13.383  -6.011  29.770  9.00  0.00           H  
ATOM   1004  H5'  DG A  31     -11.367  -6.757  31.710  8.00  0.00           H  
ATOM   1005 H2''  DG A  31      -9.830  -3.963  28.900  5.00  0.00           H  
ATOM   1006 H5''  DG A  31     -12.695  -7.624  30.970  3.00  0.00           H  
ATOM   1007  P    DG A  32     -12.037  -4.179  26.510  8.00  0.00           P  
ATOM   1008  C5'  DG A  32     -11.145  -1.821  27.340  1.00  0.00           C  
ATOM   1009  O5'  DG A  32     -10.929  -3.099  26.710  9.00  0.00           O  
ATOM   1010  C4'  DG A  32      -9.918  -0.890  27.260  7.00  0.00           C  
ATOM   1011  O4'  DG A  32      -9.204  -1.191  28.400  8.00  0.00           O  
ATOM   1012  C3'  DG A  32      -9.016  -1.093  26.060  7.00  0.00           C  
ATOM   1013  O3'  DG A  32      -8.642   0.187  25.650  7.00  0.00           O  
ATOM   1014  C2'  DG A  32      -7.864  -1.909  26.680  9.00  0.00           C  
ATOM   1015  C1'  DG A  32      -7.824  -1.266  28.000  0.00  0.00           C  
ATOM   1016  N1   DG A  32      -5.901  -1.268  32.730  1.00  0.00           N  
ATOM   1017  C2   DG A  32      -6.366  -0.238  32.040  2.00  0.00           C  
ATOM   1018  N2   DG A  32      -6.271   0.959  32.570  4.00  0.00           N  
ATOM   1019  N3   DG A  32      -6.892  -0.367  30.800  7.00  0.00           N  
ATOM   1020  C4   DG A  32      -6.739  -1.569  30.220  8.00  0.00           C  
ATOM   1021  C5   DG A  32      -6.193  -2.639  30.860  7.00  0.00           C  
ATOM   1022  C6   DG A  32      -5.795  -2.540  32.230  6.00  0.00           C  
ATOM   1023  O6   DG A  32      -5.231  -3.350  32.980  6.00  0.00           O  
ATOM   1024  N7   DG A  32      -6.225  -3.776  30.040  8.00  0.00           N  
ATOM   1025  C8   DG A  32      -6.720  -3.335  28.940  1.00  0.00           C  
ATOM   1026  N9   DG A  32      -7.064  -2.028  28.960  2.00  0.00           N  
ATOM   1027  OP1  DG A  32     -13.249  -3.560  26.020  1.00  0.00           O  
ATOM   1028  OP2  DG A  32     -11.378  -5.331  25.790  9.00  0.00           O1-
ATOM   1029  H1   DG A  32      -5.630  -1.132  33.740  4.00  0.00           H  
ATOM   1030  H8   DG A  32      -6.741  -3.981  28.040  1.00  0.00           H  
ATOM   1031  H1'  DG A  32      -7.235  -0.352  28.020  3.00  0.00           H  
ATOM   1032  H2'  DG A  32      -8.185  -3.004  26.790  2.00  0.00           H  
ATOM   1033  H21  DG A  32      -5.759   0.973  33.440  6.00  0.00           H  
ATOM   1034  H3'  DG A  32      -9.500  -1.514  25.260  7.00  0.00           H  
ATOM   1035  H22  DG A  32      -6.564   1.845  32.030  9.00  0.00           H  
ATOM   1036  H4'  DG A  32     -10.275   0.137  27.290  3.00  0.00           H  
ATOM   1037  H5'  DG A  32     -11.488  -1.916  28.330  7.00  0.00           H  
ATOM   1038 H2''  DG A  32      -6.926  -1.726  26.190  5.00  0.00           H  
ATOM   1039 H5''  DG A  32     -11.926  -1.333  26.760  2.00  0.00           H  
ATOM   1040  P    DG A  33      -7.855   0.357  24.270  1.00  0.00           P  
ATOM   1041  C5'  DG A  33      -6.382   2.568  24.070  2.00  0.00           C  
ATOM   1042  O5'  DG A  33      -7.627   1.873  24.000  7.00  0.00           O  
ATOM   1043  C4'  DG A  33      -6.646   4.052  23.730  2.00  0.00           C  
ATOM   1044  O4'  DG A  33      -7.260   4.553  24.900  1.00  0.00           O  
ATOM   1045  C3'  DG A  33      -5.448   5.012  23.420  2.00  0.00           C  
ATOM   1046  O3'  DG A  33      -4.381   4.478  22.640  7.00  0.00           O  
ATOM   1047  C2'  DG A  33      -5.094   5.456  24.820  0.00  0.00           C  
ATOM   1048  C1'  DG A  33      -6.477   5.634  25.420  1.00  0.00           C  
ATOM   1049  N1   DG A  33      -4.946   3.164  29.750  1.00  0.00           N  
ATOM   1050  C2   DG A  33      -4.826   2.762  28.450  1.00  0.00           C  
ATOM   1051  N2   DG A  33      -4.287   1.631  28.060  8.00  0.00           N  
ATOM   1052  N3   DG A  33      -5.288   3.497  27.440  4.00  0.00           N  
ATOM   1053  C4   DG A  33      -6.013   4.612  27.800  6.00  0.00           C  
ATOM   1054  C5   DG A  33      -6.245   5.067  29.050  7.00  0.00           C  
ATOM   1055  C6   DG A  33      -5.580   4.316  30.140  2.00  0.00           C  
ATOM   1056  O6   DG A  33      -5.527   4.538  31.360  2.00  0.00           O  
ATOM   1057  N7   DG A  33      -6.885   6.270  29.070  1.00  0.00           N  
ATOM   1058  C8   DG A  33      -7.052   6.482  27.760  7.00  0.00           C  
ATOM   1059  N9   DG A  33      -6.493   5.533  26.910  7.00  0.00           N  
ATOM   1060  OP1  DG A  33      -8.780  -0.036  23.150  7.00  0.00           O  
ATOM   1061  OP2  DG A  33      -6.555  -0.337  24.260  1.00  0.00           O1-
ATOM   1062  H1   DG A  33      -4.535   2.657  30.560  0.00  0.00           H  
ATOM   1063  H8   DG A  33      -7.540   7.379  27.370  5.00  0.00           H  
ATOM   1064  H1'  DG A  33      -6.957   6.453  25.050  4.00  0.00           H  
ATOM   1065  H2'  DG A  33      -4.511   4.672  25.360  3.00  0.00           H  
ATOM   1066  H21  DG A  33      -3.914   0.983  28.770  7.00  0.00           H  
ATOM   1067  H3'  DG A  33      -5.849   5.884  22.870  3.00  0.00           H  
ATOM   1068  H22  DG A  33      -4.321   1.416  27.030  3.00  0.00           H  
ATOM   1069  H4'  DG A  33      -7.403   4.073  23.010  8.00  0.00           H  
ATOM   1070  H5'  DG A  33      -5.724   2.183  23.230  1.00  0.00           H  
ATOM   1071 H2''  DG A  33      -4.543   6.371  24.840  1.00  0.00           H  
ATOM   1072 H5''  DG A  33      -5.793   2.411  24.980  2.00  0.00           H  
ATOM   1073  P    DT A  34      -4.519   4.263  21.070  0.00  0.00           P  
ATOM   1074  C5'  DT A  34      -2.143   3.214  21.010  9.00  0.00           C  
ATOM   1075  O5'  DT A  34      -2.995   4.226  20.590  5.00  0.00           O  
ATOM   1076  C4'  DT A  34      -0.774   3.182  20.290  5.00  0.00           C  
ATOM   1077  O4'  DT A  34      -0.872   2.998  18.860  2.00  0.00           O  
ATOM   1078  C3'  DT A  34      -0.106   4.567  20.370  4.00  0.00           C  
ATOM   1079  O3'  DT A  34       1.323   4.426  20.420  7.00  0.00           O  
ATOM   1080  C2'  DT A  34      -0.556   5.181  19.060  2.00  0.00           C  
ATOM   1081  C1'  DT A  34      -0.409   4.137  18.100  9.00  0.00           C  
ATOM   1082  N1   DT A  34      -1.356   4.198  16.900  9.00  0.00           N  
ATOM   1083  C2   DT A  34      -0.818   4.403  15.650  5.00  0.00           C  
ATOM   1084  O2   DT A  34       0.370   4.505  15.470  2.00  0.00           O  
ATOM   1085  N3   DT A  34      -1.716   4.548  14.590  0.00  0.00           N  
ATOM   1086  C4   DT A  34      -3.082   4.433  14.720  6.00  0.00           C  
ATOM   1087  O4   DT A  34      -3.877   4.673  13.820  0.00  0.00           O  
ATOM   1088  C5   DT A  34      -3.550   4.149  16.100  7.00  0.00           C  
ATOM   1089  C6   DT A  34      -2.699   4.090  17.150  6.00  0.00           C  
ATOM   1090  C7   DT A  34      -5.029   3.991  16.400  8.00  0.00           C  
ATOM   1091  OP1  DT A  34      -5.126   5.442  20.440  4.00  0.00           O  
ATOM   1092  OP2  DT A  34      -5.130   2.946  20.790  9.00  0.00           O1-
ATOM   1093  H3   DT A  34      -1.381   4.552  13.670  9.00  0.00           H  
ATOM   1094  H6   DT A  34      -3.026   3.884  18.170  3.00  0.00           H  
ATOM   1095  H1'  DT A  34       0.686   4.035  17.800  1.00  0.00           H  
ATOM   1096  H2'  DT A  34      -1.548   5.376  19.040  1.00  0.00           H  
ATOM   1097  H3'  DT A  34      -0.437   5.041  21.240  7.00  0.00           H  
ATOM   1098  H4'  DT A  34      -0.077   2.310  20.660  4.00  0.00           H  
ATOM   1099  H5'  DT A  34      -2.525   2.191  21.030  4.00  0.00           H  
ATOM   1100  H71  DT A  34      -5.605   4.927  16.120  3.00  0.00           H  
ATOM   1101  H72  DT A  34      -5.341   3.063  15.910  5.00  0.00           H  
ATOM   1102  H73  DT A  34      -5.238   3.882  17.440  5.00  0.00           H  
ATOM   1103 H2''  DT A  34       0.031   6.079  18.850  0.00  0.00           H  
ATOM   1104 H5''  DT A  34      -2.034   3.241  22.150  4.00  0.00           H  
ATOM   1105  P    DT A  35       2.126   5.534  21.190  7.00  0.00           P  
ATOM   1106  C5'  DT A  35       3.081   6.440  19.020  3.00  0.00           C  
ATOM   1107  O5'  DT A  35       2.214   6.662  20.040  4.00  0.00           O  
ATOM   1108  C4'  DT A  35       2.893   7.394  17.830  5.00  0.00           C  
ATOM   1109  O4'  DT A  35       1.814   7.117  16.990  2.00  0.00           O  
ATOM   1110  C3'  DT A  35       2.756   8.849  18.340  4.00  0.00           C  
ATOM   1111  O3'  DT A  35       3.785   9.816  17.890  7.00  0.00           O  
ATOM   1112  C2'  DT A  35       1.423   9.288  17.790  8.00  0.00           C  
ATOM   1113  C1'  DT A  35       1.425   8.394  16.540  1.00  0.00           C  
ATOM   1114  N1   DT A  35       0.170   8.296  15.740  3.00  0.00           N  
ATOM   1115  C2   DT A  35       0.344   7.857  14.450  1.00  0.00           C  
ATOM   1116  O2   DT A  35       1.435   7.669  13.900  2.00  0.00           O  
ATOM   1117  N3   DT A  35      -0.779   7.758  13.690  2.00  0.00           N  
ATOM   1118  C4   DT A  35      -2.102   7.663  14.160  7.00  0.00           C  
ATOM   1119  O4   DT A  35      -3.059   7.458  13.420  2.00  0.00           O  
ATOM   1120  C5   DT A  35      -2.197   8.055  15.650  7.00  0.00           C  
ATOM   1121  C6   DT A  35      -1.067   8.365  16.360  5.00  0.00           C  
ATOM   1122  C7   DT A  35      -3.543   8.032  16.350  1.00  0.00           C  
ATOM   1123  OP1  DT A  35       3.431   4.962  21.430  2.00  0.00           O  
ATOM   1124  OP2  DT A  35       1.376   6.075  22.390  5.00  0.00           O1-
ATOM   1125  H3   DT A  35      -0.572   7.431  12.760  4.00  0.00           H  
ATOM   1126  H6   DT A  35      -1.105   8.595  17.430  1.00  0.00           H  
ATOM   1127  H1'  DT A  35       2.231   8.792  15.830  9.00  0.00           H  
ATOM   1128  H2'  DT A  35       0.722   8.943  18.540  0.00  0.00           H  
ATOM   1129  H3'  DT A  35       2.665   8.827  19.410  7.00  0.00           H  
ATOM   1130  H4'  DT A  35       3.738   7.277  17.130  8.00  0.00           H  
ATOM   1131  H5'  DT A  35       2.806   5.435  18.600  1.00  0.00           H  
ATOM   1132  H71  DT A  35      -3.912   8.998  16.170  8.00  0.00           H  
ATOM   1133  H72  DT A  35      -4.173   7.181  15.920  9.00  0.00           H  
ATOM   1134  H73  DT A  35      -3.354   7.999  17.390  6.00  0.00           H  
ATOM   1135 H2''  DT A  35       1.319  10.366  17.500  3.00  0.00           H  
ATOM   1136 H5''  DT A  35       4.018   6.495  19.460  0.00  0.00           H  
ATOM   1137  P    DA A  36       4.102  11.204  18.650  8.00  0.00           P  
ATOM   1138  C5'  DA A  36       6.128  11.331  17.080  2.00  0.00           C  
ATOM   1139  O5'  DA A  36       4.976  11.923  17.570  1.00  0.00           O  
ATOM   1140  C4'  DA A  36       6.416  11.626  15.560  9.00  0.00           C  
ATOM   1141  O4'  DA A  36       5.540  10.991  14.670  2.00  0.00           O  
ATOM   1142  C3'  DA A  36       6.314  13.103  15.140  7.00  0.00           C  
ATOM   1143  O3'  DA A  36       7.152  13.302  14.020  8.00  0.00           O  
ATOM   1144  C2'  DA A  36       4.836  13.280  14.780  3.00  0.00           C  
ATOM   1145  C1'  DA A  36       4.656  11.880  14.130  0.00  0.00           C  
ATOM   1146  N1   DA A  36       0.650  10.455  11.210  0.00  0.00           N  
ATOM   1147  C2   DA A  36       1.947  10.586  10.930  7.00  0.00           C  
ATOM   1148  N3   DA A  36       2.905  10.948  11.780  4.00  0.00           N  
ATOM   1149  C4   DA A  36       2.475  11.146  13.060  1.00  0.00           C  
ATOM   1150  C5   DA A  36       1.180  11.033  13.530  4.00  0.00           C  
ATOM   1151  C6   DA A  36       0.299  10.642  12.510  9.00  0.00           C  
ATOM   1152  N6   DA A  36      -1.001  10.389  12.600  6.00  0.00           N  
ATOM   1153  N7   DA A  36       1.126  11.135  14.950  8.00  0.00           N  
ATOM   1154  C8   DA A  36       2.348  11.479  15.240  6.00  0.00           C  
ATOM   1155  N9   DA A  36       3.246  11.499  14.190  4.00  0.00           N  
ATOM   1156  OP1  DA A  36       4.974  10.915  19.850  6.00  0.00           O  
ATOM   1157  OP2  DA A  36       2.936  12.082  18.740  9.00  0.00           O1-
ATOM   1158  H2   DA A  36       2.216  10.290   9.920  6.00  0.00           H  
ATOM   1159  H8   DA A  36       2.631  11.625  16.300  2.00  0.00           H  
ATOM   1160  H1'  DA A  36       4.881  11.970  13.090  2.00  0.00           H  
ATOM   1161  H2'  DA A  36       4.359  13.451  15.720  1.00  0.00           H  
ATOM   1162  H3'  DA A  36       6.710  13.684  15.980  0.00  0.00           H  
ATOM   1163  H4'  DA A  36       7.383  11.399  15.360  0.00  0.00           H  
ATOM   1164  H5'  DA A  36       6.055  10.248  17.250  1.00  0.00           H  
ATOM   1165  H61  DA A  36      -1.455  10.160  11.780  1.00  0.00           H  
ATOM   1166  H62  DA A  36      -1.432  10.631  13.470  8.00  0.00           H  
ATOM   1167 H2''  DA A  36       4.516  14.196  14.180  7.00  0.00           H  
ATOM   1168 H5''  DA A  36       6.967  11.622  17.680  7.00  0.00           H  
ATOM   1169  P    DG A  37       7.464  14.794  13.530  7.00  0.00           P  
ATOM   1170  C5'  DG A  37       6.257  14.655  11.250  0.00  0.00           C  
ATOM   1171  O5'  DG A  37       6.235  15.148  12.590  6.00  0.00           O  
ATOM   1172  C4'  DG A  37       5.128  15.002  10.320  4.00  0.00           C  
ATOM   1173  O4'  DG A  37       3.834  14.330  10.670  2.00  0.00           O  
ATOM   1174  C3'  DG A  37       4.892  16.525  10.400  6.00  0.00           C  
ATOM   1175  O3'  DG A  37       4.495  17.101   9.170  1.00  0.00           O  
ATOM   1176  C2'  DG A  37       3.752  16.594  11.340  9.00  0.00           C  
ATOM   1177  C1'  DG A  37       2.871  15.375  10.960  5.00  0.00           C  
ATOM   1178  N1   DG A  37      -1.803  13.734  11.000  7.00  0.00           N  
ATOM   1179  C2   DG A  37      -0.871  13.798  10.060  3.00  0.00           C  
ATOM   1180  N2   DG A  37      -1.338  13.626   8.860  0.00  0.00           N  
ATOM   1181  N3   DG A  37       0.424  14.080  10.180  4.00  0.00           N  
ATOM   1182  C4   DG A  37       0.646  14.408  11.420  9.00  0.00           C  
ATOM   1183  C5   DG A  37      -0.215  14.309  12.470  4.00  0.00           C  
ATOM   1184  C6   DG A  37      -1.594  13.993  12.320  4.00  0.00           C  
ATOM   1185  O6   DG A  37      -2.538  13.878  13.120  9.00  0.00           O  
ATOM   1186  N7   DG A  37       0.473  14.816  13.600  5.00  0.00           N  
ATOM   1187  C8   DG A  37       1.633  15.245  13.190  6.00  0.00           C  
ATOM   1188  N9   DG A  37       1.808  14.990  11.860  4.00  0.00           N  
ATOM   1189  OP1  DG A  37       8.654  14.858  12.640  7.00  0.00           O  
ATOM   1190  OP2  DG A  37       7.314  15.763  14.640  0.00  0.00           O1-
ATOM   1191  H1   DG A  37      -2.725  13.486  10.680  1.00  0.00           H  
ATOM   1192  H8   DG A  37       2.427  15.671  13.740  3.00  0.00           H  
ATOM   1193  H1'  DG A  37       2.434  15.608   9.930  5.00  0.00           H  
ATOM   1194  H2'  DG A  37       4.025  16.355  12.390  9.00  0.00           H  
ATOM   1195  H21  DG A  37      -2.300  13.196   8.750  0.00  0.00           H  
ATOM   1196  H3'  DG A  37       5.794  17.062  10.810  6.00  0.00           H  
ATOM   1197  H22  DG A  37      -0.666  13.846   8.100  4.00  0.00           H  
ATOM   1198  H4'  DG A  37       5.401  14.720   9.250  7.00  0.00           H  
ATOM   1199  H5'  DG A  37       6.441  13.597  11.250  1.00  0.00           H  
ATOM   1200 H2''  DG A  37       3.253  17.547  11.180  6.00  0.00           H  
ATOM   1201 H5''  DG A  37       7.051  15.088  10.700  6.00  0.00           H  
ATOM   1202  P    DG A  38       5.242  18.360   8.470  9.00  0.00           P  
ATOM   1203  C5'  DG A  38       4.364  17.889   6.000  8.00  0.00           C  
ATOM   1204  O5'  DG A  38       4.377  18.610   7.190  0.00  0.00           O  
ATOM   1205  C4'  DG A  38       2.905  17.790   5.560  3.00  0.00           C  
ATOM   1206  O4'  DG A  38       2.184  17.283   6.620  3.00  0.00           O  
ATOM   1207  C3'  DG A  38       2.326  19.097   4.960  7.00  0.00           C  
ATOM   1208  O3'  DG A  38       1.769  18.729   3.730  8.00  0.00           O  
ATOM   1209  C2'  DG A  38       1.404  19.369   6.110  4.00  0.00           C  
ATOM   1210  C1'  DG A  38       0.981  18.034   6.670  7.00  0.00           C  
ATOM   1211  N1   DG A  38      -2.995  17.134   9.710  6.00  0.00           N  
ATOM   1212  C2   DG A  38      -2.761  16.816   8.400  4.00  0.00           C  
ATOM   1213  N2   DG A  38      -3.731  16.242   7.820  6.00  0.00           N  
ATOM   1214  N3   DG A  38      -1.665  17.084   7.720  3.00  0.00           N  
ATOM   1215  C4   DG A  38      -0.772  17.772   8.490  6.00  0.00           C  
ATOM   1216  C5   DG A  38      -0.864  18.074   9.840  9.00  0.00           C  
ATOM   1217  C6   DG A  38      -2.063  17.762  10.540  3.00  0.00           C  
ATOM   1218  O6   DG A  38      -2.255  17.777  11.740  8.00  0.00           O  
ATOM   1219  N7   DG A  38       0.280  18.763  10.230  8.00  0.00           N  
ATOM   1220  C8   DG A  38       1.008  18.815   9.170  2.00  0.00           C  
ATOM   1221  N9   DG A  38       0.441  18.202   8.040  5.00  0.00           N  
ATOM   1222  OP1  DG A  38       6.592  17.967   7.980  2.00  0.00           O  
ATOM   1223  OP2  DG A  38       5.092  19.543   9.340  3.00  0.00           O1-
ATOM   1224  H1   DG A  38      -3.901  16.944  10.220  4.00  0.00           H  
ATOM   1225  H8   DG A  38       1.880  19.408   9.200  8.00  0.00           H  
ATOM   1226  H1'  DG A  38       0.305  17.545   6.090  0.00  0.00           H  
ATOM   1227  H2'  DG A  38       1.967  19.931   6.810  9.00  0.00           H  
ATOM   1228  H21  DG A  38      -4.577  16.230   8.280  4.00  0.00           H  
ATOM   1229  H3'  DG A  38       3.172  19.816   4.800  6.00  0.00           H  
ATOM   1230  H22  DG A  38      -3.553  15.975   6.880  0.00  0.00           H  
ATOM   1231  H4'  DG A  38       2.867  17.048   4.780  2.00  0.00           H  
ATOM   1232  H5'  DG A  38       4.778  16.891   6.060  5.00  0.00           H  
ATOM   1233 H2''  DG A  38       0.515  19.974   5.760  8.00  0.00           H  
ATOM   1234 H5''  DG A  38       4.943  18.471   5.210  1.00  0.00           H  
ATOM   1235  P    DG A  39       1.096  19.713   2.730  8.00  0.00           P  
ATOM   1236  C5'  DG A  39      -1.268  18.614   3.210  2.00  0.00           C  
ATOM   1237  O5'  DG A  39      -0.459  19.809   3.190  1.00  0.00           O  
ATOM   1238  C4'  DG A  39      -2.678  18.683   3.840  1.00  0.00           C  
ATOM   1239  O4'  DG A  39      -2.559  18.837   5.250  6.00  0.00           O  
ATOM   1240  C3'  DG A  39      -3.493  19.882   3.350  0.00  0.00           C  
ATOM   1241  O3'  DG A  39      -4.735  19.453   2.870  0.00  0.00           O  
ATOM   1242  C2'  DG A  39      -3.708  20.583   4.610  5.00  0.00           C  
ATOM   1243  C1'  DG A  39      -3.673  19.516   5.700  5.00  0.00           C  
ATOM   1244  N1   DG A  39      -5.568  20.381  10.270  6.00  0.00           N  
ATOM   1245  C2   DG A  39      -6.173  20.009   9.140  1.00  0.00           C  
ATOM   1246  N2   DG A  39      -7.454  19.762   9.190  3.00  0.00           N  
ATOM   1247  N3   DG A  39      -5.629  19.992   7.970  8.00  0.00           N  
ATOM   1248  C4   DG A  39      -4.298  20.229   8.050  7.00  0.00           C  
ATOM   1249  C5   DG A  39      -3.528  20.536   9.200  3.00  0.00           C  
ATOM   1250  C6   DG A  39      -4.280  20.730  10.340  8.00  0.00           C  
ATOM   1251  O6   DG A  39      -4.020  21.086  11.470  9.00  0.00           O  
ATOM   1252  N7   DG A  39      -2.172  20.592   8.880  2.00  0.00           N  
ATOM   1253  C8   DG A  39      -2.208  20.284   7.610  9.00  0.00           C  
ATOM   1254  N9   DG A  39      -3.435  20.043   7.080  0.00  0.00           N  
ATOM   1255  OP1  DG A  39       1.111  19.116   1.430  0.00  0.00           O  
ATOM   1256  OP2  DG A  39       1.728  21.038   2.990  1.00  0.00           O1-
ATOM   1257  H1   DG A  39      -6.069  20.531  11.160  1.00  0.00           H  
ATOM   1258  H8   DG A  39      -1.309  20.355   7.060  6.00  0.00           H  
ATOM   1259  H1'  DG A  39      -4.565  18.885   5.780  5.00  0.00           H  
ATOM   1260  H2'  DG A  39      -2.864  21.223   4.820  4.00  0.00           H  
ATOM   1261  H21  DG A  39      -7.907  20.045  10.020  6.00  0.00           H  
ATOM   1262  H3'  DG A  39      -2.976  20.596   2.700  9.00  0.00           H  
ATOM   1263  H22  DG A  39      -8.025  19.552   8.380  4.00  0.00           H  
ATOM   1264  H4'  DG A  39      -3.185  17.760   3.610  5.00  0.00           H  
ATOM   1265  H5'  DG A  39      -0.716  17.944   3.900  9.00  0.00           H  
ATOM   1266 H2''  DG A  39      -4.605  21.208   4.640  4.00  0.00           H  
ATOM   1267 H5''  DG A  39      -1.398  18.278   2.140  2.00  0.00           H  
ATOM   1268  P    DT A  40      -5.649  20.321   1.910  3.00  0.00           P  
ATOM   1269  C5'  DT A  40      -7.594  20.292   3.660  3.00  0.00           C  
ATOM   1270  O5'  DT A  40      -6.593  21.064   3.020  5.00  0.00           O  
ATOM   1271  C4'  DT A  40      -8.451  20.994   4.750  1.00  0.00           C  
ATOM   1272  O4'  DT A  40      -7.748  21.089   5.970  0.00  0.00           O  
ATOM   1273  C3'  DT A  40      -9.062  22.336   4.390  9.00  0.00           C  
ATOM   1274  O3'  DT A  40     -10.466  22.310   4.680  1.00  0.00           O  
ATOM   1275  C2'  DT A  40      -8.340  23.323   5.380  1.00  0.00           C  
ATOM   1276  C1'  DT A  40      -8.100  22.335   6.560  6.00  0.00           C  
ATOM   1277  N1   DT A  40      -7.091  22.905   7.550  7.00  0.00           N  
ATOM   1278  C2   DT A  40      -7.481  23.278   8.840  6.00  0.00           C  
ATOM   1279  O2   DT A  40      -8.639  23.299   9.260  4.00  0.00           O  
ATOM   1280  N3   DT A  40      -6.549  23.711   9.680  7.00  0.00           N  
ATOM   1281  C4   DT A  40      -5.206  24.028   9.330  2.00  0.00           C  
ATOM   1282  O4   DT A  40      -4.399  24.480  10.130  0.00  0.00           O  
ATOM   1283  C5   DT A  40      -4.802  23.547   8.020  0.00  0.00           C  
ATOM   1284  C6   DT A  40      -5.750  23.062   7.160  3.00  0.00           C  
ATOM   1285  C7   DT A  40      -3.362  23.615   7.600  3.00  0.00           C  
ATOM   1286  OP1  DT A  40      -6.474  19.359   1.190  0.00  0.00           O  
ATOM   1287  OP2  DT A  40      -4.841  21.282   1.140  4.00  0.00           O1-
ATOM   1288  H3   DT A  40      -6.851  23.962  10.630  7.00  0.00           H  
ATOM   1289  H6   DT A  40      -5.517  22.859   6.160  3.00  0.00           H  
ATOM   1290  H1'  DT A  40      -9.107  22.236   7.020  3.00  0.00           H  
ATOM   1291  H2'  DT A  40      -7.404  23.575   4.860  7.00  0.00           H  
ATOM   1292  H3'  DT A  40      -8.839  22.592   3.320  7.00  0.00           H  
ATOM   1293  H4'  DT A  40      -9.269  20.351   4.970  9.00  0.00           H  
ATOM   1294  H5'  DT A  40      -7.230  19.425   4.210  8.00  0.00           H  
ATOM   1295  H71  DT A  40      -2.565  23.623   8.410  4.00  0.00           H  
ATOM   1296  H72  DT A  40      -2.968  22.987   6.880  1.00  0.00           H  
ATOM   1297  H73  DT A  40      -3.143  24.643   7.240  5.00  0.00           H  
ATOM   1298 H2''  DT A  40      -8.994  24.161   5.590  0.00  0.00           H  
ATOM   1299 H5''  DT A  40      -8.292  19.850   2.960  0.00  0.00           H  
ATOM   1300  P    DT A  41     -11.487  23.363   4.060  2.00  0.00           P  
ATOM   1301  C5'  DT A  41     -13.063  23.242   6.180  7.00  0.00           C  
ATOM   1302  O5'  DT A  41     -12.290  24.019   5.310  6.00  0.00           O  
ATOM   1303  C4'  DT A  41     -13.347  23.812   7.590  4.00  0.00           C  
ATOM   1304  O4'  DT A  41     -12.156  24.072   8.250  5.00  0.00           O  
ATOM   1305  C3'  DT A  41     -14.216  25.053   7.580  5.00  0.00           C  
ATOM   1306  O3'  DT A  41     -15.237  24.897   8.540  3.00  0.00           O  
ATOM   1307  C2'  DT A  41     -13.334  26.181   7.930  8.00  0.00           C  
ATOM   1308  C1'  DT A  41     -12.315  25.379   8.800  6.00  0.00           C  
ATOM   1309  N1   DT A  41     -11.046  26.068   8.910  6.00  0.00           N  
ATOM   1310  C2   DT A  41     -10.440  26.163  10.180  9.00  0.00           C  
ATOM   1311  O2   DT A  41     -11.077  25.903  11.160  4.00  0.00           O  
ATOM   1312  N3   DT A  41      -9.099  26.622  10.200  2.00  0.00           N  
ATOM   1313  C4   DT A  41      -8.267  26.757   9.110  7.00  0.00           C  
ATOM   1314  O4   DT A  41      -7.073  27.110   9.240  1.00  0.00           O  
ATOM   1315  C5   DT A  41      -8.971  26.655   7.870  3.00  0.00           C  
ATOM   1316  C6   DT A  41     -10.293  26.296   7.780  9.00  0.00           C  
ATOM   1317  C7   DT A  41      -8.323  27.145   6.550  9.00  0.00           C  
ATOM   1318  OP1  DT A  41     -12.404  22.520   3.260  9.00  0.00           O  
ATOM   1319  OP2  DT A  41     -10.776  24.503   3.440  0.00  0.00           O1-
ATOM   1320  H3   DT A  41      -8.688  26.652  11.100  1.00  0.00           H  
ATOM   1321  H6   DT A  41     -10.745  26.204   6.790  8.00  0.00           H  
ATOM   1322  H1'  DT A  41     -12.758  25.237   9.810  6.00  0.00           H  
ATOM   1323  H2'  DT A  41     -12.896  26.461   7.000  2.00  0.00           H  
ATOM   1324  H3'  DT A  41     -14.650  25.143   6.580  6.00  0.00           H  
ATOM   1325  H4'  DT A  41     -13.867  22.965   8.180  9.00  0.00           H  
ATOM   1326  H5'  DT A  41     -12.562  22.275   6.300  4.00  0.00           H  
ATOM   1327  H71  DT A  41      -7.798  28.107   6.610  9.00  0.00           H  
ATOM   1328  H72  DT A  41      -7.632  26.466   6.160  7.00  0.00           H  
ATOM   1329  H73  DT A  41      -9.075  27.229   5.740  1.00  0.00           H  
ATOM   1330 H2''  DT A  41     -13.848  27.081   8.360  6.00  0.00           H  
ATOM   1331 H5''  DT A  41     -14.053  23.027   5.750  4.00  0.00           H  
ATOM   1332  P    DA A  42     -16.719  25.663   8.410  2.00  0.00           P  
ATOM   1333  C5'  DA A  42     -16.459  26.980  10.630  3.00  0.00           C  
ATOM   1334  O5'  DA A  42     -16.387  26.938   9.210  0.00  0.00           O  
ATOM   1335  C4'  DA A  42     -15.740  28.188  11.210  6.00  0.00           C  
ATOM   1336  O4'  DA A  42     -14.365  28.102  10.760  6.00  0.00           O  
ATOM   1337  C3'  DA A  42     -16.314  29.552  10.810  8.00  0.00           C  
ATOM   1338  O3'  DA A  42     -16.531  30.347  11.960  3.00  0.00           O  
ATOM   1339  C2'  DA A  42     -15.160  30.018   9.850  4.00  0.00           C  
ATOM   1340  C1'  DA A  42     -13.881  29.379  10.460  0.00  0.00           C  
ATOM   1341  N1   DA A  42      -8.903  30.035  10.700  7.00  0.00           N  
ATOM   1342  C2   DA A  42      -9.760  29.779  11.660  6.00  0.00           C  
ATOM   1343  N3   DA A  42     -11.047  29.517  11.470  8.00  0.00           N  
ATOM   1344  C4   DA A  42     -11.397  29.547  10.140  8.00  0.00           C  
ATOM   1345  C5   DA A  42     -10.526  29.599   9.100  4.00  0.00           C  
ATOM   1346  C6   DA A  42      -9.226  29.939   9.440  6.00  0.00           C  
ATOM   1347  N6   DA A  42      -8.254  30.173   8.630  4.00  0.00           N  
ATOM   1348  N7   DA A  42     -11.290  29.590   7.840  1.00  0.00           N  
ATOM   1349  C8   DA A  42     -12.492  29.375   8.270  0.00  0.00           C  
ATOM   1350  N9   DA A  42     -12.673  29.443   9.600  7.00  0.00           N  
ATOM   1351  OP1  DA A  42     -17.663  24.867   9.150  9.00  0.00           O  
ATOM   1352  OP2  DA A  42     -16.955  25.917   6.950  4.00  0.00           O1-
ATOM   1353  H2   DA A  42      -9.305  29.778  12.650  8.00  0.00           H  
ATOM   1354  H8   DA A  42     -13.353  29.157   7.600  5.00  0.00           H  
ATOM   1355  H1'  DA A  42     -13.689  29.866  11.520  0.00  0.00           H  
ATOM   1356  H2'  DA A  42     -15.263  29.575   8.860  5.00  0.00           H  
ATOM   1357  H3'  DA A  42     -17.223  29.365  10.210  1.00  0.00           H  
ATOM   1358  H4'  DA A  42     -15.660  28.138  12.320  3.00  0.00           H  
ATOM   1359  H5'  DA A  42     -16.090  26.031  11.120  5.00  0.00           H  
ATOM   1360  H61  DA A  42      -7.307  30.257   8.990  1.00  0.00           H  
ATOM   1361  H62  DA A  42      -8.431  30.427   7.680  9.00  0.00           H  
ATOM   1362 H2''  DA A  42     -15.064  31.060   9.770  6.00  0.00           H  
ATOM   1363 H5''  DA A  42     -17.491  27.010  10.970  8.00  0.00           H  
ATOM   1364  P    DG A  43     -17.417  31.572  12.020  5.00  0.00           P  
ATOM   1365  C5'  DG A  43     -15.807  33.731  12.080  0.00  0.00           C  
ATOM   1366  O5'  DG A  43     -16.643  32.847  11.340  4.00  0.00           O  
ATOM   1367  C4'  DG A  43     -14.546  33.060  12.540  1.00  0.00           C  
ATOM   1368  O4'  DG A  43     -13.674  32.489  11.560  1.00  0.00           O  
ATOM   1369  C3'  DG A  43     -13.725  34.207  13.110  9.00  0.00           C  
ATOM   1370  O3'  DG A  43     -14.046  34.727  14.380  8.00  0.00           O  
ATOM   1371  C2'  DG A  43     -12.361  33.579  13.240  5.00  0.00           C  
ATOM   1372  C1'  DG A  43     -12.366  32.530  12.200  2.00  0.00           C  
ATOM   1373  N1   DG A  43      -7.453  33.709  11.170  9.00  0.00           N  
ATOM   1374  C2   DG A  43      -8.109  33.578  12.390  7.00  0.00           C  
ATOM   1375  N2   DG A  43      -7.461  33.884  13.530  5.00  0.00           N  
ATOM   1376  N3   DG A  43      -9.404  33.297  12.520  5.00  0.00           N  
ATOM   1377  C4   DG A  43     -10.039  33.109  11.330  5.00  0.00           C  
ATOM   1378  C5   DG A  43      -9.429  33.119  10.060  7.00  0.00           C  
ATOM   1379  C6   DG A  43      -8.001  33.408   9.970  0.00  0.00           C  
ATOM   1380  O6   DG A  43      -7.413  33.526   8.920  7.00  0.00           O  
ATOM   1381  N7   DG A  43     -10.377  32.956   9.050  3.00  0.00           N  
ATOM   1382  C8   DG A  43     -11.482  32.755   9.690  6.00  0.00           C  
ATOM   1383  N9   DG A  43     -11.395  32.958  11.080  1.00  0.00           N  
ATOM   1384  OP1  DG A  43     -17.529  31.852  13.490  8.00  0.00           O  
ATOM   1385  OP2  DG A  43     -18.591  31.359  11.170  4.00  0.00           O1-
ATOM   1386  H1   DG A  43      -6.412  33.881  11.140  0.00  0.00           H  
ATOM   1387  H8   DG A  43     -12.393  32.534   9.260  5.00  0.00           H  
ATOM   1388  H1'  DG A  43     -12.225  31.537  12.700  7.00  0.00           H  
ATOM   1389  H2'  DG A  43     -11.534  34.317  13.030  5.00  0.00           H  
ATOM   1390  H21  DG A  43      -6.457  34.061  13.510  2.00  0.00           H  
ATOM   1391  H3'  DG A  43     -13.731  35.023  12.440  3.00  0.00           H  
ATOM   1392  H22  DG A  43      -8.051  34.169  14.260  0.00  0.00           H  
ATOM   1393  H4'  DG A  43     -14.827  32.419  13.400  6.00  0.00           H  
ATOM   1394  H5'  DG A  43     -16.380  34.028  12.960  5.00  0.00           H  
ATOM   1395 H2''  DG A  43     -12.179  33.165  14.180  6.00  0.00           H  
ATOM   1396 H5''  DG A  43     -15.620  34.607  11.470  4.00  0.00           H  
ATOM   1397  P    DG A  44     -13.583  36.275  14.750  0.00  0.00           P  
ATOM   1398  C5'  DG A  44     -11.742  35.390  16.360  4.00  0.00           C  
ATOM   1399  O5'  DG A  44     -12.064  35.992  15.180  9.00  0.00           O  
ATOM   1400  C4'  DG A  44     -10.264  35.347  16.680  2.00  0.00           C  
ATOM   1401  O4'  DG A  44      -9.425  35.325  15.490  8.00  0.00           O  
ATOM   1402  C3'  DG A  44      -9.902  36.598  17.490  6.00  0.00           C  
ATOM   1403  O3'  DG A  44      -8.847  36.346  18.390  8.00  0.00           O  
ATOM   1404  C2'  DG A  44      -9.473  37.527  16.360  4.00  0.00           C  
ATOM   1405  C1'  DG A  44      -8.709  36.528  15.490  6.00  0.00           C  
ATOM   1406  N1   DG A  44      -5.785  37.467  11.470  9.00  0.00           N  
ATOM   1407  C2   DG A  44      -5.429  37.549  12.790  2.00  0.00           C  
ATOM   1408  N2   DG A  44      -4.209  37.813  13.170  3.00  0.00           N  
ATOM   1409  N3   DG A  44      -6.291  37.328  13.760  6.00  0.00           N  
ATOM   1410  C4   DG A  44      -7.572  37.193  13.290  5.00  0.00           C  
ATOM   1411  C5   DG A  44      -8.034  37.174  11.950  6.00  0.00           C  
ATOM   1412  C6   DG A  44      -7.092  37.385  10.920  9.00  0.00           C  
ATOM   1413  O6   DG A  44      -7.131  37.316   9.660  8.00  0.00           O  
ATOM   1414  N7   DG A  44      -9.432  37.016  11.850  6.00  0.00           N  
ATOM   1415  C8   DG A  44      -9.726  36.952  13.150  2.00  0.00           C  
ATOM   1416  N9   DG A  44      -8.642  36.911  14.040  6.00  0.00           N  
ATOM   1417  OP1  DG A  44     -14.342  36.606  15.980  6.00  0.00           O  
ATOM   1418  OP2  DG A  44     -13.608  37.045  13.480  9.00  0.00           O1-
ATOM   1419  H1   DG A  44      -5.016  37.583  10.800  3.00  0.00           H  
ATOM   1420  H8   DG A  44     -10.739  36.783  13.420  4.00  0.00           H  
ATOM   1421  H1'  DG A  44      -7.676  36.359  15.970  4.00  0.00           H  
ATOM   1422  H2'  DG A  44     -10.283  37.803  15.720  8.00  0.00           H  
ATOM   1423  H21  DG A  44      -3.494  37.995  12.410  5.00  0.00           H  
ATOM   1424  H3'  DG A  44     -10.722  37.074  17.990  6.00  0.00           H  
ATOM   1425  H22  DG A  44      -4.001  37.815  14.140  9.00  0.00           H  
ATOM   1426  H4'  DG A  44     -10.155  34.402  17.250  1.00  0.00           H  
ATOM   1427  H5'  DG A  44     -12.201  34.368  16.360  2.00  0.00           H  
ATOM   1428 H2''  DG A  44      -8.843  38.401  16.580  1.00  0.00           H  
ATOM   1429 H5''  DG A  44     -12.225  35.838  17.190  9.00  0.00           H  
ATOM   1430  P   DG3 A  45      -8.371  37.400  19.480  5.00  0.00           P  
ATOM   1431  C5' DG3 A  45      -6.082  37.852  18.290  0.00  0.00           C  
ATOM   1432  O5' DG3 A  45      -7.393  38.309  18.650  9.00  0.00           O  
ATOM   1433  C4' DG3 A  45      -5.303  38.886  17.330  1.00  0.00           C  
ATOM   1434  O4' DG3 A  45      -5.839  38.903  15.990  2.00  0.00           O  
ATOM   1435  C3' DG3 A  45      -5.340  40.357  17.850  6.00  0.00           C  
ATOM   1436  O3' DG3 A  45      -3.999  40.784  17.940  7.00  0.00           O  
ATOM   1437  C2' DG3 A  45      -6.013  41.102  16.780  1.00  0.00           C  
ATOM   1438  C1' DG3 A  45      -5.649  40.206  15.590  9.00  0.00           C  
ATOM   1439  N1  DG3 A  45      -5.843  41.731  10.670  5.00  0.00           N  
ATOM   1440  C2  DG3 A  45      -4.772  41.538  11.430  5.00  0.00           C  
ATOM   1441  N2  DG3 A  45      -3.554  41.694  10.920  6.00  0.00           N  
ATOM   1442  N3  DG3 A  45      -4.870  41.197  12.750  5.00  0.00           N  
ATOM   1443  C4  DG3 A  45      -6.154  41.012  13.200  9.00  0.00           C  
ATOM   1444  C5  DG3 A  45      -7.271  41.003  12.430  7.00  0.00           C  
ATOM   1445  C6  DG3 A  45      -7.179  41.471  11.060  1.00  0.00           C  
ATOM   1446  O6  DG3 A  45      -8.095  41.755  10.260  4.00  0.00           O  
ATOM   1447  N7  DG3 A  45      -8.402  40.683  13.110  7.00  0.00           N  
ATOM   1448  C8  DG3 A  45      -7.875  40.326  14.280  8.00  0.00           C  
ATOM   1449  N9  DG3 A  45      -6.502  40.497  14.400  9.00  0.00           N  
ATOM   1450  OP1 DG3 A  45      -7.505  36.685  20.520  3.00  0.00           O  
ATOM   1451  OP2 DG3 A  45      -9.600  38.093  19.870  7.00  0.00           O  
ATOM   1452 HO3' DG3 A  45      -4.051  41.667  18.310  8.00  0.00           H  
ATOM   1453  H1  DG3 A  45      -5.529  41.829   9.740  6.00  0.00           H  
ATOM   1454  H8  DG3 A  45      -8.450  39.960  15.080  0.00  0.00           H  
ATOM   1455  H1' DG3 A  45      -4.626  40.406  15.320  1.00  0.00           H  
ATOM   1456  H2' DG3 A  45      -7.117  41.105  16.990  7.00  0.00           H  
ATOM   1457  H21 DG3 A  45      -3.381  42.083  10.050  0.00  0.00           H  
ATOM   1458  H3' DG3 A  45      -5.912  40.427  18.780  7.00  0.00           H  
ATOM   1459  H22 DG3 A  45      -2.759  41.576  11.540  2.00  0.00           H  
ATOM   1460  H4' DG3 A  45      -4.241  38.557  17.300  0.00  0.00           H  
ATOM   1461  H5' DG3 A  45      -6.111  36.884  17.760  2.00  0.00           H  
ATOM   1462 H2'' DG3 A  45      -5.627  42.164  16.710  3.00  0.00           H  
ATOM   1463 H5'' DG3 A  45      -5.519  37.824  19.210  5.00  0.00           H  
ATOM   1464  C5' DC5 A  46      -1.156  43.519   3.310  7.00  0.00           C  
ATOM   1465  O5' DC5 A  46      -1.865  42.946   2.200  2.00  0.00           O  
ATOM   1466  C4' DC5 A  46      -1.137  42.763   4.610  4.00  0.00           C  
ATOM   1467  O4' DC5 A  46      -2.373  42.905   5.290  3.00  0.00           O  
ATOM   1468  C3' DC5 A  46      -0.736  41.307   4.450  4.00  0.00           C  
ATOM   1469  O3' DC5 A  46       0.164  40.872   5.480  2.00  0.00           O  
ATOM   1470  C2' DC5 A  46      -2.026  40.571   4.720  5.00  0.00           C  
ATOM   1471  C1' DC5 A  46      -2.603  41.537   5.800  5.00  0.00           C  
ATOM   1472  N1  DC5 A  46      -3.998  41.315   6.090  2.00  0.00           N  
ATOM   1473  C2  DC5 A  46      -4.410  41.724   7.370  6.00  0.00           C  
ATOM   1474  O2  DC5 A  46      -3.574  42.103   8.200  2.00  0.00           O  
ATOM   1475  N3  DC5 A  46      -5.717  41.645   7.770  9.00  0.00           N  
ATOM   1476  C4  DC5 A  46      -6.530  41.134   6.890  9.00  0.00           C  
ATOM   1477  N4  DC5 A  46      -7.734  41.031   7.400  6.00  0.00           N  
ATOM   1478  C5  DC5 A  46      -6.164  40.642   5.670  0.00  0.00           C  
ATOM   1479  C6  DC5 A  46      -4.915  40.899   5.210  7.00  0.00           C  
ATOM   1480 HO5' DC5 A  46      -2.820  43.035   2.460  8.00  0.00           H  
ATOM   1481  H5  DC5 A  46      -6.875  40.202   4.970  6.00  0.00           H  
ATOM   1482  H6  DC5 A  46      -4.593  40.535   4.240  1.00  0.00           H  
ATOM   1483  H1' DC5 A  46      -2.076  41.455   6.750  2.00  0.00           H  
ATOM   1484  H2' DC5 A  46      -2.611  40.612   3.790  9.00  0.00           H  
ATOM   1485  H3' DC5 A  46      -0.347  41.165   3.370  4.00  0.00           H  
ATOM   1486  H4' DC5 A  46      -0.374  43.131   5.270  7.00  0.00           H  
ATOM   1487  H41 DC5 A  46      -7.801  41.212   8.410  0.00  0.00           H  
ATOM   1488  H5' DC5 A  46      -1.489  44.566   3.480  8.00  0.00           H  
ATOM   1489  H42 DC5 A  46      -8.427  40.356   7.040  0.00  0.00           H  
ATOM   1490 H2'' DC5 A  46      -1.822  39.509   5.010  5.00  0.00           H  
ATOM   1491 H5'' DC5 A  46      -0.103  43.537   2.940  6.00  0.00           H  
ATOM   1492  P    DC A  47       1.374  39.912   5.140  9.00  0.00           P  
ATOM   1493  C5'  DC A  47       2.592  40.087   7.470  9.00  0.00           C  
ATOM   1494  O5'  DC A  47       1.788  39.303   6.570  0.00  0.00           O  
ATOM   1495  C4'  DC A  47       2.201  39.856   8.930  3.00  0.00           C  
ATOM   1496  O4'  DC A  47       0.797  40.195   9.070  6.00  0.00           O  
ATOM   1497  C3'  DC A  47       2.326  38.405   9.580  2.00  0.00           C  
ATOM   1498  O3'  DC A  47       2.586  38.560  10.980  4.00  0.00           O  
ATOM   1499  C2'  DC A  47       0.890  37.897   9.410  9.00  0.00           C  
ATOM   1500  C1'  DC A  47       0.022  39.150   9.780  7.00  0.00           C  
ATOM   1501  N1   DC A  47      -1.331  38.954   9.290  8.00  0.00           N  
ATOM   1502  C2   DC A  47      -2.415  38.779  10.140  5.00  0.00           C  
ATOM   1503  O2   DC A  47      -2.368  38.987  11.350  9.00  0.00           O  
ATOM   1504  N3   DC A  47      -3.645  38.428   9.640  4.00  0.00           N  
ATOM   1505  C4   DC A  47      -3.800  38.276   8.360  9.00  0.00           C  
ATOM   1506  N4   DC A  47      -5.010  38.069   7.930  3.00  0.00           N  
ATOM   1507  C5   DC A  47      -2.721  38.462   7.460  8.00  0.00           C  
ATOM   1508  C6   DC A  47      -1.514  38.831   7.970  9.00  0.00           C  
ATOM   1509  OP1  DC A  47       2.409  40.797   4.580  0.00  0.00           O  
ATOM   1510  OP2  DC A  47       0.880  38.744   4.360  3.00  0.00           O1-
ATOM   1511  H5   DC A  47      -2.839  38.406   6.350  4.00  0.00           H  
ATOM   1512  H6   DC A  47      -0.661  39.023   7.310  7.00  0.00           H  
ATOM   1513  H1'  DC A  47       0.002  39.277  10.900  2.00  0.00           H  
ATOM   1514  H2'  DC A  47       0.719  37.579   8.400  5.00  0.00           H  
ATOM   1515  H3'  DC A  47       3.109  37.755   9.070  6.00  0.00           H  
ATOM   1516  H4'  DC A  47       2.781  40.491   9.540  3.00  0.00           H  
ATOM   1517  H41  DC A  47      -5.736  38.048   8.680  8.00  0.00           H  
ATOM   1518  H5'  DC A  47       2.525  41.193   7.190  2.00  0.00           H  
ATOM   1519  H42  DC A  47      -5.217  37.993   6.860  7.00  0.00           H  
ATOM   1520 H2''  DC A  47       0.753  36.959   9.960  2.00  0.00           H  
ATOM   1521 H5''  DC A  47       3.587  39.718   7.350  0.00  0.00           H  
ATOM   1522  P    DC A  48       2.913  37.327  11.940  3.00  0.00           P  
ATOM   1523  C5'  DC A  48       0.880  37.534  13.590  1.00  0.00           C  
ATOM   1524  O5'  DC A  48       1.508  36.827  12.550  5.00  0.00           O  
ATOM   1525  C4'  DC A  48      -0.490  36.898  13.970  4.00  0.00           C  
ATOM   1526  O4'  DC A  48      -1.432  36.773  12.880  5.00  0.00           O  
ATOM   1527  C3'  DC A  48      -0.210  35.480  14.520  3.00  0.00           C  
ATOM   1528  O3'  DC A  48      -0.660  35.419  15.920  3.00  0.00           O  
ATOM   1529  C2'  DC A  48      -0.994  34.581  13.520  8.00  0.00           C  
ATOM   1530  C1'  DC A  48      -2.076  35.541  13.020  1.00  0.00           C  
ATOM   1531  N1   DC A  48      -2.708  35.056  11.790  8.00  0.00           N  
ATOM   1532  C2   DC A  48      -3.998  34.546  11.850  5.00  0.00           C  
ATOM   1533  O2   DC A  48      -4.500  34.245  12.960  9.00  0.00           O  
ATOM   1534  N3   DC A  48      -4.647  34.258  10.730  3.00  0.00           N  
ATOM   1535  C4   DC A  48      -4.055  34.577   9.590  5.00  0.00           C  
ATOM   1536  N4   DC A  48      -4.741  34.187   8.590  1.00  0.00           N  
ATOM   1537  C5   DC A  48      -2.726  35.229   9.460  1.00  0.00           C  
ATOM   1538  C6   DC A  48      -2.116  35.432  10.640  6.00  0.00           C  
ATOM   1539  OP1  DC A  48       3.680  38.000  13.090  9.00  0.00           O  
ATOM   1540  OP2  DC A  48       3.406  36.150  11.240  3.00  0.00           O1-
ATOM   1541  H5   DC A  48      -2.314  35.576   8.550  7.00  0.00           H  
ATOM   1542  H6   DC A  48      -1.113  35.905  10.720  6.00  0.00           H  
ATOM   1543  H1'  DC A  48      -2.942  35.596  13.800  3.00  0.00           H  
ATOM   1544  H2'  DC A  48      -0.430  34.275  12.630  7.00  0.00           H  
ATOM   1545  H3'  DC A  48       0.870  35.153  14.440  6.00  0.00           H  
ATOM   1546  H4'  DC A  48      -0.884  37.486  14.800  1.00  0.00           H  
ATOM   1547  H41  DC A  48      -5.606  33.728   8.700  6.00  0.00           H  
ATOM   1548  H5'  DC A  48       0.780  38.549  13.360  1.00  0.00           H  
ATOM   1549  H42  DC A  48      -4.363  34.419   7.680  6.00  0.00           H  
ATOM   1550 H2''  DC A  48      -1.457  33.682  13.970  2.00  0.00           H  
ATOM   1551 H5''  DC A  48       1.532  37.446  14.430  4.00  0.00           H  
ATOM   1552  P    DT A  49      -0.305  34.162  16.810  6.00  0.00           P  
ATOM   1553  C5'  DT A  49      -2.797  33.389  17.250  8.00  0.00           C  
ATOM   1554  O5'  DT A  49      -1.558  33.209  16.530  2.00  0.00           O  
ATOM   1555  C4'  DT A  49      -3.874  32.277  17.290  0.00  0.00           C  
ATOM   1556  O4'  DT A  49      -4.686  32.222  16.100  4.00  0.00           O  
ATOM   1557  C3'  DT A  49      -3.319  30.872  17.330  8.00  0.00           C  
ATOM   1558  O3'  DT A  49      -4.265  30.014  18.000  0.00  0.00           O  
ATOM   1559  C2'  DT A  49      -3.328  30.470  15.870  0.00  0.00           C  
ATOM   1560  C1'  DT A  49      -4.662  30.974  15.470  4.00  0.00           C  
ATOM   1561  N1   DT A  49      -4.935  31.077  14.030  1.00  0.00           N  
ATOM   1562  C2   DT A  49      -6.198  30.766  13.530  5.00  0.00           C  
ATOM   1563  O2   DT A  49      -7.166  30.581  14.290  5.00  0.00           O  
ATOM   1564  N3   DT A  49      -6.415  30.704  12.170  5.00  0.00           N  
ATOM   1565  C4   DT A  49      -5.345  30.519  11.300  8.00  0.00           C  
ATOM   1566  O4   DT A  49      -5.660  30.159  10.150  6.00  0.00           O  
ATOM   1567  C5   DT A  49      -4.067  31.001  11.800  5.00  0.00           C  
ATOM   1568  C6   DT A  49      -3.909  31.291  13.160  6.00  0.00           C  
ATOM   1569  C7   DT A  49      -2.933  31.327  10.820  2.00  0.00           C  
ATOM   1570  OP1  DT A  49      -0.272  34.623  18.240  1.00  0.00           O  
ATOM   1571  OP2  DT A  49       0.908  33.420  16.270  0.00  0.00           O1-
ATOM   1572  H3   DT A  49      -7.230  30.263  11.820  0.00  0.00           H  
ATOM   1573  H6   DT A  49      -3.084  31.821  13.530  1.00  0.00           H  
ATOM   1574  H1'  DT A  49      -5.420  30.301  15.910  3.00  0.00           H  
ATOM   1575  H2'  DT A  49      -2.661  31.096  15.320  8.00  0.00           H  
ATOM   1576  H3'  DT A  49      -2.321  30.746  17.760  2.00  0.00           H  
ATOM   1577  H4'  DT A  49      -4.582  32.469  18.160  4.00  0.00           H  
ATOM   1578  H5'  DT A  49      -3.246  34.386  17.050  0.00  0.00           H  
ATOM   1579  H71  DT A  49      -2.494  30.315  10.680  9.00  0.00           H  
ATOM   1580  H72  DT A  49      -3.355  31.674   9.920  7.00  0.00           H  
ATOM   1581  H73  DT A  49      -2.248  32.105  11.190  0.00  0.00           H  
ATOM   1582 H2''  DT A  49      -3.200  29.414  15.640  3.00  0.00           H  
ATOM   1583 H5''  DT A  49      -2.591  33.365  18.270  2.00  0.00           H  
ATOM   1584  P    DA A  50      -4.150  29.490  19.560  8.00  0.00           P  
ATOM   1585  C5'  DA A  50      -6.592  29.712  20.280  7.00  0.00           C  
ATOM   1586  O5'  DA A  50      -5.555  28.833  19.920  3.00  0.00           O  
ATOM   1587  C4'  DA A  50      -8.017  29.249  19.890  6.00  0.00           C  
ATOM   1588  O4'  DA A  50      -7.963  29.157  18.500  1.00  0.00           O  
ATOM   1589  C3'  DA A  50      -8.388  27.864  20.280  5.00  0.00           C  
ATOM   1590  O3'  DA A  50      -9.809  27.764  20.610  8.00  0.00           O  
ATOM   1591  C2'  DA A  50      -8.077  27.037  19.100  2.00  0.00           C  
ATOM   1592  C1'  DA A  50      -8.358  27.991  17.950  2.00  0.00           C  
ATOM   1593  N1   DA A  50      -8.268  27.241  12.880  2.00  0.00           N  
ATOM   1594  C2   DA A  50      -9.253  27.303  13.740  5.00  0.00           C  
ATOM   1595  N3   DA A  50      -9.201  27.538  15.060  9.00  0.00           N  
ATOM   1596  C4   DA A  50      -7.918  27.502  15.500  4.00  0.00           C  
ATOM   1597  C5   DA A  50      -6.728  27.439  14.720  7.00  0.00           C  
ATOM   1598  C6   DA A  50      -6.986  27.358  13.310  2.00  0.00           C  
ATOM   1599  N6   DA A  50      -6.059  27.454  12.310  1.00  0.00           N  
ATOM   1600  N7   DA A  50      -5.603  27.437  15.500  4.00  0.00           N  
ATOM   1601  C8   DA A  50      -6.150  27.673  16.650  2.00  0.00           C  
ATOM   1602  N9   DA A  50      -7.485  27.738  16.760  1.00  0.00           N  
ATOM   1603  OP1  DA A  50      -3.908  30.733  20.330  4.00  0.00           O  
ATOM   1604  OP2  DA A  50      -3.185  28.347  19.510  3.00  0.00           O1-
ATOM   1605  H2   DA A  50     -10.264  27.476  13.270  7.00  0.00           H  
ATOM   1606  H8   DA A  50      -5.451  27.906  17.440  2.00  0.00           H  
ATOM   1607  H1'  DA A  50      -9.438  28.073  17.640  9.00  0.00           H  
ATOM   1608  H2'  DA A  50      -7.006  26.901  19.200  5.00  0.00           H  
ATOM   1609  H3'  DA A  50      -7.697  27.597  21.070  2.00  0.00           H  
ATOM   1610  H4'  DA A  50      -8.756  29.962  20.250  9.00  0.00           H  
ATOM   1611  H5'  DA A  50      -6.419  30.740  19.910  0.00  0.00           H  
ATOM   1612  H61  DA A  50      -6.407  27.372  11.410  5.00  0.00           H  
ATOM   1613  H62  DA A  50      -5.095  27.446  12.560  3.00  0.00           H  
ATOM   1614 H2''  DA A  50      -8.720  26.153  19.000  0.00  0.00           H  
ATOM   1615 H5''  DA A  50      -6.639  29.862  21.390  2.00  0.00           H  
ATOM   1616  P    DA A  51     -10.503  26.629  21.410  5.00  0.00           P  
ATOM   1617  C5'  DA A  51     -11.897  25.679  19.430  6.00  0.00           C  
ATOM   1618  O5'  DA A  51     -10.892  25.448  20.350  7.00  0.00           O  
ATOM   1619  C4'  DA A  51     -11.978  24.728  18.180  6.00  0.00           C  
ATOM   1620  O4'  DA A  51     -10.805  25.014  17.340  0.00  0.00           O  
ATOM   1621  C3'  DA A  51     -12.008  23.238  18.580  3.00  0.00           C  
ATOM   1622  O3'  DA A  51     -13.122  22.560  17.920  9.00  0.00           O  
ATOM   1623  C2'  DA A  51     -10.672  22.876  18.040  8.00  0.00           C  
ATOM   1624  C1'  DA A  51     -10.501  23.710  16.840  1.00  0.00           C  
ATOM   1625  N1   DA A  51      -7.632  24.064  12.530  6.00  0.00           N  
ATOM   1626  C2   DA A  51      -8.889  24.022  12.680  0.00  0.00           C  
ATOM   1627  N3   DA A  51      -9.588  23.873  13.860  6.00  0.00           N  
ATOM   1628  C4   DA A  51      -8.747  23.847  14.950  1.00  0.00           C  
ATOM   1629  C5   DA A  51      -7.380  23.905  14.960  7.00  0.00           C  
ATOM   1630  C6   DA A  51      -6.919  24.057  13.600  8.00  0.00           C  
ATOM   1631  N6   DA A  51      -5.671  24.062  13.180  4.00  0.00           N  
ATOM   1632  N7   DA A  51      -6.847  23.723  16.230  5.00  0.00           N  
ATOM   1633  C8   DA A  51      -7.924  23.878  17.000  1.00  0.00           C  
ATOM   1634  N9   DA A  51      -9.121  23.767  16.270  0.00  0.00           N  
ATOM   1635  OP1  DA A  51     -11.790  27.108  22.010  7.00  0.00           O  
ATOM   1636  OP2  DA A  51      -9.548  25.995  22.340  9.00  0.00           O1-
ATOM   1637  H2   DA A  51      -9.555  23.990  11.780  9.00  0.00           H  
ATOM   1638  H8   DA A  51      -7.877  23.781  18.090  8.00  0.00           H  
ATOM   1639  H1'  DA A  51     -11.098  23.324  15.980  9.00  0.00           H  
ATOM   1640  H2'  DA A  51      -9.802  22.877  18.670  7.00  0.00           H  
ATOM   1641  H3'  DA A  51     -12.038  22.979  19.610  5.00  0.00           H  
ATOM   1642  H4'  DA A  51     -12.894  24.954  17.530  0.00  0.00           H  
ATOM   1643  H5'  DA A  51     -11.648  26.576  18.940  3.00  0.00           H  
ATOM   1644  H61  DA A  51      -5.559  23.977  12.200  5.00  0.00           H  
ATOM   1645  H62  DA A  51      -4.950  23.797  13.840  2.00  0.00           H  
ATOM   1646 H2''  DA A  51     -10.653  21.792  17.700  4.00  0.00           H  
ATOM   1647 H5''  DA A  51     -12.856  25.867  19.900  9.00  0.00           H  
ATOM   1648  P    DC A  52     -13.387  21.002  18.060  0.00  0.00           P  
ATOM   1649  C5'  DC A  52     -13.506  21.211  15.370  1.00  0.00           C  
ATOM   1650  O5'  DC A  52     -12.898  20.600  16.570  0.00  0.00           O  
ATOM   1651  C4'  DC A  52     -12.974  20.663  14.040  3.00  0.00           C  
ATOM   1652  O4'  DC A  52     -11.666  21.178  13.740  2.00  0.00           O  
ATOM   1653  C3'  DC A  52     -13.101  19.135  13.810  8.00  0.00           C  
ATOM   1654  O3'  DC A  52     -13.650  18.913  12.550  2.00  0.00           O  
ATOM   1655  C2'  DC A  52     -11.609  18.874  13.970  3.00  0.00           C  
ATOM   1656  C1'  DC A  52     -10.953  20.081  13.260  2.00  0.00           C  
ATOM   1657  N1   DC A  52      -9.561  20.290  13.580  0.00  0.00           N  
ATOM   1658  C2   DC A  52      -8.672  20.547  12.500  8.00  0.00           C  
ATOM   1659  O2   DC A  52      -9.047  20.637  11.340  6.00  0.00           O  
ATOM   1660  N3   DC A  52      -7.362  20.618  12.670  3.00  0.00           N  
ATOM   1661  C4   DC A  52      -6.940  20.620  13.890  7.00  0.00           C  
ATOM   1662  N4   DC A  52      -5.632  20.846  13.960  9.00  0.00           N  
ATOM   1663  C5   DC A  52      -7.751  20.508  15.060  2.00  0.00           C  
ATOM   1664  C6   DC A  52      -9.049  20.292  14.820  6.00  0.00           C  
ATOM   1665  OP1  DC A  52     -14.868  20.826  18.160  8.00  0.00           O  
ATOM   1666  OP2  DC A  52     -12.533  20.413  19.100  7.00  0.00           O1-
ATOM   1667  H5   DC A  52      -7.437  20.531  16.110  4.00  0.00           H  
ATOM   1668  H6   DC A  52      -9.780  20.106  15.610  1.00  0.00           H  
ATOM   1669  H1'  DC A  52     -11.211  19.945  12.190  5.00  0.00           H  
ATOM   1670  H2'  DC A  52     -11.487  18.907  15.080  9.00  0.00           H  
ATOM   1671  H3'  DC A  52     -13.665  18.594  14.530  9.00  0.00           H  
ATOM   1672  H4'  DC A  52     -13.551  21.156  13.270  5.00  0.00           H  
ATOM   1673  H41  DC A  52      -5.056  20.942  13.090  1.00  0.00           H  
ATOM   1674  H5'  DC A  52     -13.233  22.281  15.450  8.00  0.00           H  
ATOM   1675  H42  DC A  52      -5.196  20.941  14.860  0.00  0.00           H  
ATOM   1676 H2''  DC A  52     -11.226  17.951  13.530  4.00  0.00           H  
ATOM   1677 H5''  DC A  52     -14.609  21.049  15.390  1.00  0.00           H  
ATOM   1678  P    DC A  53     -13.862  17.508  11.850  6.00  0.00           P  
ATOM   1679  C5'  DC A  53     -12.170  17.517   9.880  8.00  0.00           C  
ATOM   1680  O5'  DC A  53     -12.463  17.133  11.220  1.00  0.00           O  
ATOM   1681  C4'  DC A  53     -10.929  16.687   9.270  6.00  0.00           C  
ATOM   1682  O4'  DC A  53      -9.661  17.117   9.740  5.00  0.00           O  
ATOM   1683  C3'  DC A  53     -11.059  15.125   9.450  9.00  0.00           C  
ATOM   1684  O3'  DC A  53     -10.947  14.630   8.130  4.00  0.00           O  
ATOM   1685  C2'  DC A  53      -9.834  14.910  10.290  2.00  0.00           C  
ATOM   1686  C1'  DC A  53      -8.826  15.998   9.870  1.00  0.00           C  
ATOM   1687  N1   DC A  53      -7.734  16.304  10.810  5.00  0.00           N  
ATOM   1688  C2   DC A  53      -6.458  16.558  10.310  7.00  0.00           C  
ATOM   1689  O2   DC A  53      -6.118  16.261   9.190  5.00  0.00           O  
ATOM   1690  N3   DC A  53      -5.470  17.073  11.110  8.00  0.00           N  
ATOM   1691  C4   DC A  53      -5.738  17.259  12.370  6.00  0.00           C  
ATOM   1692  N4   DC A  53      -4.830  17.837  13.080  0.00  0.00           N  
ATOM   1693  C5   DC A  53      -6.939  16.838  12.920  5.00  0.00           C  
ATOM   1694  C6   DC A  53      -7.926  16.322  12.190  7.00  0.00           C  
ATOM   1695  OP1  DC A  53     -14.976  17.679  10.900  8.00  0.00           O  
ATOM   1696  OP2  DC A  53     -14.044  16.577  12.970  4.00  0.00           O1-
ATOM   1697  H5   DC A  53      -7.075  16.942  14.000  3.00  0.00           H  
ATOM   1698  H6   DC A  53      -8.856  16.000  12.670  4.00  0.00           H  
ATOM   1699  H1'  DC A  53      -8.466  15.772   8.890  1.00  0.00           H  
ATOM   1700  H2'  DC A  53     -10.066  15.105  11.330  2.00  0.00           H  
ATOM   1701  H3'  DC A  53     -12.045  14.894   9.940  7.00  0.00           H  
ATOM   1702  H4'  DC A  53     -10.842  16.874   8.230  7.00  0.00           H  
ATOM   1703  H41  DC A  53      -3.888  17.859  12.620  5.00  0.00           H  
ATOM   1704  H5'  DC A  53     -11.928  18.562   9.790  7.00  0.00           H  
ATOM   1705  H42  DC A  53      -5.092  18.108  14.030  9.00  0.00           H  
ATOM   1706 H2''  DC A  53      -9.429  13.896  10.210  4.00  0.00           H  
ATOM   1707 H5''  DC A  53     -13.084  17.375   9.300  5.00  0.00           H  
ATOM   1708  P    DC A  54     -11.175  13.129   7.710  7.00  0.00           P  
ATOM   1709  C5'  DC A  54      -9.580  13.633   5.750  5.00  0.00           C  
ATOM   1710  O5'  DC A  54      -9.839  12.823   6.900  5.00  0.00           O  
ATOM   1711  C4'  DC A  54      -8.142  13.454   5.190  4.00  0.00           C  
ATOM   1712  O4'  DC A  54      -7.195  14.011   6.090  9.00  0.00           O  
ATOM   1713  C3'  DC A  54      -7.799  11.999   4.950  9.00  0.00           C  
ATOM   1714  O3'  DC A  54      -6.866  11.989   3.940  6.00  0.00           O  
ATOM   1715  C2'  DC A  54      -7.125  11.673   6.270  1.00  0.00           C  
ATOM   1716  C1'  DC A  54      -6.391  12.965   6.550  0.00  0.00           C  
ATOM   1717  N1   DC A  54      -6.034  13.061   7.980  0.00  0.00           N  
ATOM   1718  C2   DC A  54      -4.725  13.088   8.370  3.00  0.00           C  
ATOM   1719  O2   DC A  54      -3.830  13.017   7.550  6.00  0.00           O  
ATOM   1720  N3   DC A  54      -4.364  13.194   9.670  4.00  0.00           N  
ATOM   1721  C4   DC A  54      -5.367  13.291  10.510  5.00  0.00           C  
ATOM   1722  N4   DC A  54      -5.074  13.220  11.730  6.00  0.00           N  
ATOM   1723  C5   DC A  54      -6.705  13.107  10.270  8.00  0.00           C  
ATOM   1724  C6   DC A  54      -7.073  13.046   8.890  5.00  0.00           C  
ATOM   1725  OP1  DC A  54     -12.298  13.003   6.810  6.00  0.00           O  
ATOM   1726  OP2  DC A  54     -11.229  12.356   9.010  5.00  0.00           O1-
ATOM   1727  H5   DC A  54      -7.485  13.060  11.090  0.00  0.00           H  
ATOM   1728  H6   DC A  54      -8.067  12.907   8.490  3.00  0.00           H  
ATOM   1729  H1'  DC A  54      -5.525  12.868   6.000  3.00  0.00           H  
ATOM   1730  H2'  DC A  54      -7.782  11.451   7.020  9.00  0.00           H  
ATOM   1731  H3'  DC A  54      -8.677  11.353   4.870  1.00  0.00           H  
ATOM   1732  H4'  DC A  54      -8.196  13.966   4.260  0.00  0.00           H  
ATOM   1733  H41  DC A  54      -4.080  13.460  11.990  8.00  0.00           H  
ATOM   1734  H5'  DC A  54      -9.665  14.682   5.950  8.00  0.00           H  
ATOM   1735  H42  DC A  54      -5.746  13.252  12.490  0.00  0.00           H  
ATOM   1736 H2''  DC A  54      -6.448  10.816   6.150  4.00  0.00           H  
ATOM   1737 H5''  DC A  54     -10.276  13.350   4.990  2.00  0.00           H  
ATOM   1738  P    DT A  55      -6.675  10.675   2.990  3.00  0.00           P  
ATOM   1739  C5'  DT A  55      -4.878   8.765   3.640  6.00  0.00           C  
ATOM   1740  O5'  DT A  55      -5.843   9.804   3.970  0.00  0.00           O  
ATOM   1741  C4'  DT A  55      -3.542   9.511   3.370  1.00  0.00           C  
ATOM   1742  O4'  DT A  55      -3.131  10.162   4.600  7.00  0.00           O  
ATOM   1743  C3'  DT A  55      -2.446   8.482   3.160  3.00  0.00           C  
ATOM   1744  O3'  DT A  55      -1.347   8.962   2.400  8.00  0.00           O  
ATOM   1745  C2'  DT A  55      -2.029   8.012   4.580  8.00  0.00           C  
ATOM   1746  C1'  DT A  55      -2.130   9.352   5.300  0.00  0.00           C  
ATOM   1747  N1   DT A  55      -2.318   9.281   6.790  9.00  0.00           N  
ATOM   1748  C2   DT A  55      -1.238   9.654   7.670  5.00  0.00           C  
ATOM   1749  O2   DT A  55      -0.049   9.707   7.270  3.00  0.00           O  
ATOM   1750  N3   DT A  55      -1.530   9.907   8.970  3.00  0.00           N  
ATOM   1751  C4   DT A  55      -2.753  10.008   9.490  7.00  0.00           C  
ATOM   1752  O4   DT A  55      -2.848  10.348  10.640  5.00  0.00           O  
ATOM   1753  C5   DT A  55      -3.868   9.642   8.560  7.00  0.00           C  
ATOM   1754  C6   DT A  55      -3.589   9.232   7.290  2.00  0.00           C  
ATOM   1755  C7   DT A  55      -5.331   9.702   9.030  9.00  0.00           C  
ATOM   1756  OP1  DT A  55      -5.872  11.036   1.810  4.00  0.00           O  
ATOM   1757  OP2  DT A  55      -7.992  10.056   2.860  4.00  0.00           O1-
ATOM   1758  H3   DT A  55      -0.761   9.985   9.600  3.00  0.00           H  
ATOM   1759  H6   DT A  55      -4.365   8.950   6.600  2.00  0.00           H  
ATOM   1760  H1'  DT A  55      -1.209   9.916   5.080  2.00  0.00           H  
ATOM   1761  H2'  DT A  55      -2.778   7.408   5.000  5.00  0.00           H  
ATOM   1762  H3'  DT A  55      -2.792   7.631   2.570  1.00  0.00           H  
ATOM   1763  H4'  DT A  55      -3.707  10.229   2.520  9.00  0.00           H  
ATOM   1764  H5'  DT A  55      -5.164   8.325   2.730  4.00  0.00           H  
ATOM   1765  H71  DT A  55      -5.372  10.547   9.710  7.00  0.00           H  
ATOM   1766  H72  DT A  55      -5.998   9.854   8.150  9.00  0.00           H  
ATOM   1767  H73  DT A  55      -5.703   8.772   9.500  9.00  0.00           H  
ATOM   1768 H2''  DT A  55      -1.031   7.546   4.650  7.00  0.00           H  
ATOM   1769 H5''  DT A  55      -4.724   8.075   4.430  9.00  0.00           H  
ATOM   1770  P    DA A  56      -0.516   8.010   1.490  4.00  0.00           P  
ATOM   1771  C5'  DA A  56       1.597   7.961   3.120  0.00  0.00           C  
ATOM   1772  O5'  DA A  56       0.435   7.286   2.570  2.00  0.00           O  
ATOM   1773  C4'  DA A  56       2.217   7.218   4.320  8.00  0.00           C  
ATOM   1774  O4'  DA A  56       1.361   7.412   5.440  2.00  0.00           O  
ATOM   1775  C3'  DA A  56       2.469   5.684   4.160  0.00  0.00           C  
ATOM   1776  O3'  DA A  56       3.705   5.466   4.740  2.00  0.00           O  
ATOM   1777  C2'  DA A  56       1.313   5.135   4.980  7.00  0.00           C  
ATOM   1778  C1'  DA A  56       1.259   6.182   6.140  8.00  0.00           C  
ATOM   1779  N1   DA A  56      -0.748   6.991  10.810  1.00  0.00           N  
ATOM   1780  C2   DA A  56       0.445   7.312  10.380  7.00  0.00           C  
ATOM   1781  N3   DA A  56       0.890   7.079   9.160  2.00  0.00           N  
ATOM   1782  C4   DA A  56      -0.027   6.477   8.360  2.00  0.00           C  
ATOM   1783  C5   DA A  56      -1.281   6.074   8.700  2.00  0.00           C  
ATOM   1784  C6   DA A  56      -1.596   6.393  10.030  3.00  0.00           C  
ATOM   1785  N6   DA A  56      -2.813   6.245  10.630  1.00  0.00           N  
ATOM   1786  N7   DA A  56      -2.039   5.686   7.540  9.00  0.00           N  
ATOM   1787  C8   DA A  56      -1.170   5.706   6.620  2.00  0.00           C  
ATOM   1788  N9   DA A  56       0.065   6.052   6.990  9.00  0.00           N  
ATOM   1789  OP1  DA A  56       0.405   8.875   0.730  9.00  0.00           O  
ATOM   1790  OP2  DA A  56      -1.380   7.029   0.750  3.00  0.00           O1-
ATOM   1791  H2   DA A  56       1.077   7.834  11.050  8.00  0.00           H  
ATOM   1792  H8   DA A  56      -1.351   5.337   5.620  1.00  0.00           H  
ATOM   1793  H1'  DA A  56       2.179   6.096   6.770  8.00  0.00           H  
ATOM   1794  H2'  DA A  56       0.512   5.162   4.310  3.00  0.00           H  
ATOM   1795  H3'  DA A  56       2.317   5.410   3.080  8.00  0.00           H  
ATOM   1796  H4'  DA A  56       3.201   7.683   4.580  5.00  0.00           H  
ATOM   1797  H5'  DA A  56       1.341   9.004   3.320  8.00  0.00           H  
ATOM   1798  H61  DA A  56      -2.873   6.518  11.580  6.00  0.00           H  
ATOM   1799  H62  DA A  56      -3.534   5.807  10.050  2.00  0.00           H  
ATOM   1800 H2''  DA A  56       1.435   4.199   5.390  9.00  0.00           H  
ATOM   1801 H5''  DA A  56       2.358   8.071   2.290  2.00  0.00           H  
ATOM   1802  P    DA A  57       4.718   4.376   4.250  7.00  0.00           P  
ATOM   1803  C5'  DA A  57       6.907   5.585   4.990  5.00  0.00           C  
ATOM   1804  O5'  DA A  57       5.939   4.603   5.270  7.00  0.00           O  
ATOM   1805  C4'  DA A  57       7.944   5.782   6.020  9.00  0.00           C  
ATOM   1806  O4'  DA A  57       7.542   6.585   7.070  3.00  0.00           O  
ATOM   1807  C3'  DA A  57       8.511   4.606   6.790  4.00  0.00           C  
ATOM   1808  O3'  DA A  57       9.930   4.834   6.960  9.00  0.00           O  
ATOM   1809  C2'  DA A  57       7.658   4.580   8.010  2.00  0.00           C  
ATOM   1810  C1'  DA A  57       7.820   6.031   8.310  3.00  0.00           C  
ATOM   1811  N1   DA A  57       4.137   5.828  12.060  6.00  0.00           N  
ATOM   1812  C2   DA A  57       4.766   4.870  11.420  8.00  0.00           C  
ATOM   1813  N3   DA A  57       5.720   4.968  10.480  9.00  0.00           N  
ATOM   1814  C4   DA A  57       5.897   6.224  10.090  7.00  0.00           C  
ATOM   1815  C5   DA A  57       5.343   7.320  10.640  9.00  0.00           C  
ATOM   1816  C6   DA A  57       4.393   7.039  11.630  8.00  0.00           C  
ATOM   1817  N6   DA A  57       3.670   8.003  12.160  6.00  0.00           N  
ATOM   1818  N7   DA A  57       5.764   8.507  10.040  1.00  0.00           N  
ATOM   1819  C8   DA A  57       6.683   8.084   9.200  2.00  0.00           C  
ATOM   1820  N9   DA A  57       6.863   6.720   9.210  3.00  0.00           N  
ATOM   1821  OP1  DA A  57       5.147   4.734   2.880  5.00  0.00           O  
ATOM   1822  OP2  DA A  57       3.989   3.145   4.370  9.00  0.00           O1-
ATOM   1823  H2   DA A  57       4.484   3.875  11.780  3.00  0.00           H  
ATOM   1824  H8   DA A  57       7.209   8.791   8.550  3.00  0.00           H  
ATOM   1825  H1'  DA A  57       8.833   6.224   8.640  3.00  0.00           H  
ATOM   1826  H2'  DA A  57       6.652   4.358   7.880  9.00  0.00           H  
ATOM   1827  H3'  DA A  57       8.357   3.604   6.240  6.00  0.00           H  
ATOM   1828  H4'  DA A  57       8.733   6.224   5.410  1.00  0.00           H  
ATOM   1829  H5'  DA A  57       6.420   6.577   4.790  0.00  0.00           H  
ATOM   1830  H61  DA A  57       2.908   7.789  12.780  0.00  0.00           H  
ATOM   1831  H62  DA A  57       3.849   8.936  11.820  8.00  0.00           H  
ATOM   1832 H2''  DA A  57       7.998   3.984   8.850  1.00  0.00           H  
ATOM   1833 H5''  DA A  57       7.531   5.365   4.060  0.00  0.00           H  
ATOM   1834  P    DC A  58      10.945   3.820   7.530  5.00  0.00           P  
ATOM   1835  C5'  DC A  58      11.661   3.753  10.120  5.00  0.00           C  
ATOM   1836  O5'  DC A  58      10.703   4.089   9.080  9.00  0.00           O  
ATOM   1837  C4'  DC A  58      11.008   4.140  11.480  3.00  0.00           C  
ATOM   1838  O4'  DC A  58      10.788   5.522  11.630  2.00  0.00           O  
ATOM   1839  C3'  DC A  58       9.666   3.503  11.790  9.00  0.00           C  
ATOM   1840  O3'  DC A  58       9.738   2.816  13.010  3.00  0.00           O  
ATOM   1841  C2'  DC A  58       8.687   4.695  12.050  7.00  0.00           C  
ATOM   1842  C1'  DC A  58       9.707   5.686  12.570  7.00  0.00           C  
ATOM   1843  N1   DC A  58       9.133   7.070  12.310  8.00  0.00           N  
ATOM   1844  C2   DC A  58       8.283   7.537  13.340  9.00  0.00           C  
ATOM   1845  O2   DC A  58       7.863   6.880  14.320  1.00  0.00           O  
ATOM   1846  N3   DC A  58       7.930   8.834  13.300  1.00  0.00           N  
ATOM   1847  C4   DC A  58       8.256   9.579  12.270  7.00  0.00           C  
ATOM   1848  N4   DC A  58       7.737  10.762  12.350  2.00  0.00           N  
ATOM   1849  C5   DC A  58       9.032   9.148  11.190  1.00  0.00           C  
ATOM   1850  C6   DC A  58       9.473   7.884  11.260  7.00  0.00           C  
ATOM   1851  OP1  DC A  58      12.261   4.212   7.070  8.00  0.00           O  
ATOM   1852  OP2  DC A  58      10.453   2.435   7.220  5.00  0.00           O1-
ATOM   1853  H5   DC A  58       9.189   9.833  10.360  3.00  0.00           H  
ATOM   1854  H6   DC A  58      10.253   7.628  10.480  1.00  0.00           H  
ATOM   1855  H1'  DC A  58      10.067   5.432  13.540  5.00  0.00           H  
ATOM   1856  H2'  DC A  58       8.282   5.056  11.120  9.00  0.00           H  
ATOM   1857  H3'  DC A  58       9.332   2.844  11.040  0.00  0.00           H  
ATOM   1858  H4'  DC A  58      11.835   3.806  12.180  4.00  0.00           H  
ATOM   1859  H41  DC A  58       7.330  11.051  13.290  5.00  0.00           H  
ATOM   1860  H5'  DC A  58      12.531   4.303  10.000  0.00  0.00           H  
ATOM   1861  H42  DC A  58       8.110  11.543  11.740  8.00  0.00           H  
ATOM   1862 H2''  DC A  58       7.854   4.481  12.730  3.00  0.00           H  
ATOM   1863 H5''  DC A  58      11.824   2.654  10.100  1.00  0.00           H  
ATOM   1864  P    DC A  59       9.634   1.230  13.120  4.00  0.00           P  
ATOM   1865  C5'  DC A  59       7.035   1.546  12.730  5.00  0.00           C  
ATOM   1866  O5'  DC A  59       8.060   0.968  13.470  3.00  0.00           O  
ATOM   1867  C4'  DC A  59       5.747   0.779  13.170  6.00  0.00           C  
ATOM   1868  O4'  DC A  59       4.622   1.186  12.280  5.00  0.00           O  
ATOM   1869  C3'  DC A  59       5.889  -0.681  12.950  0.00  0.00           C  
ATOM   1870  O3'  DC A  59       5.178  -1.479  13.890  8.00  0.00           O  
ATOM   1871  C2'  DC A  59       5.342  -0.823  11.570  8.00  0.00           C  
ATOM   1872  C1'  DC A  59       4.207   0.181  11.410  2.00  0.00           C  
ATOM   1873  N1   DC A  59       3.755   0.691  10.100  7.00  0.00           N  
ATOM   1874  C2   DC A  59       2.509   0.391   9.620  2.00  0.00           C  
ATOM   1875  O2   DC A  59       1.647  -0.279  10.170  9.00  0.00           O  
ATOM   1876  N3   DC A  59       2.179   0.697   8.330  0.00  0.00           N  
ATOM   1877  C4   DC A  59       2.985   1.358   7.630  6.00  0.00           C  
ATOM   1878  N4   DC A  59       2.449   1.768   6.500  2.00  0.00           N  
ATOM   1879  C5   DC A  59       4.265   1.719   8.140  9.00  0.00           C  
ATOM   1880  C6   DC A  59       4.625   1.365   9.380  2.00  0.00           C  
ATOM   1881  OP1  DC A  59      10.490   0.946  14.280  1.00  0.00           O  
ATOM   1882  OP2  DC A  59       9.969   0.594  11.840  7.00  0.00           O1-
ATOM   1883  H5   DC A  59       4.870   2.388   7.480  6.00  0.00           H  
ATOM   1884  H6   DC A  59       5.599   1.714   9.800  9.00  0.00           H  
ATOM   1885  H1'  DC A  59       3.399  -0.333  11.990  0.00  0.00           H  
ATOM   1886  H2'  DC A  59       6.131  -0.529  10.910  6.00  0.00           H  
ATOM   1887  H3'  DC A  59       6.947  -1.067  12.990  5.00  0.00           H  
ATOM   1888  H4'  DC A  59       5.464   0.991  14.170  8.00  0.00           H  
ATOM   1889  H41  DC A  59       1.587   1.265   6.320  7.00  0.00           H  
ATOM   1890  H5'  DC A  59       7.226   1.499  11.650  2.00  0.00           H  
ATOM   1891  H42  DC A  59       2.897   2.412   5.870  1.00  0.00           H  
ATOM   1892 H2''  DC A  59       5.096  -1.884  11.340  0.00  0.00           H  
ATOM   1893 H5''  DC A  59       6.934   2.596  12.990  0.00  0.00           H  
ATOM   1894  P    DC A  60       5.666  -2.640  14.730  8.00  0.00           P  
ATOM   1895  C5'  DC A  60       6.634  -4.202  12.880  4.00  0.00           C  
ATOM   1896  O5'  DC A  60       5.605  -3.959  13.840  3.00  0.00           O  
ATOM   1897  C4'  DC A  60       6.330  -5.452  12.110  3.00  0.00           C  
ATOM   1898  O4'  DC A  60       6.260  -6.722  12.860  3.00  0.00           O  
ATOM   1899  C3'  DC A  60       5.091  -5.443  11.180  0.00  0.00           C  
ATOM   1900  O3'  DC A  60       5.593  -6.042   9.970  2.00  0.00           O  
ATOM   1901  C2'  DC A  60       4.142  -6.342  11.950  1.00  0.00           C  
ATOM   1902  C1'  DC A  60       5.085  -7.430  12.470  9.00  0.00           C  
ATOM   1903  N1   DC A  60       4.510  -8.329  13.540  4.00  0.00           N  
ATOM   1904  C2   DC A  60       4.386  -9.729  13.240  4.00  0.00           C  
ATOM   1905  O2   DC A  60       4.887 -10.200  12.210  5.00  0.00           O  
ATOM   1906  N3   DC A  60       3.733 -10.589  14.100  7.00  0.00           N  
ATOM   1907  C4   DC A  60       3.283 -10.095  15.230  4.00  0.00           C  
ATOM   1908  N4   DC A  60       2.788 -10.954  16.040  8.00  0.00           N  
ATOM   1909  C5   DC A  60       3.456  -8.747  15.590  7.00  0.00           C  
ATOM   1910  C6   DC A  60       4.059  -7.875  14.700  8.00  0.00           C  
ATOM   1911  OP1  DC A  60       4.666  -2.789  15.850  6.00  0.00           O  
ATOM   1912  OP2  DC A  60       7.073  -2.394  15.120  3.00  0.00           O1-
ATOM   1913  H5   DC A  60       2.933  -8.396  16.430  7.00  0.00           H  
ATOM   1914  H6   DC A  60       4.118  -6.840  14.830  9.00  0.00           H  
ATOM   1915  H1'  DC A  60       5.413  -8.046  11.680  4.00  0.00           H  
ATOM   1916  H2'  DC A  60       3.625  -5.827  12.770  2.00  0.00           H  
ATOM   1917  H3'  DC A  60       4.613  -4.440  11.040  4.00  0.00           H  
ATOM   1918  H4'  DC A  60       7.204  -5.564  11.370  5.00  0.00           H  
ATOM   1919  H41  DC A  60       2.802 -11.906  15.700  3.00  0.00           H  
ATOM   1920  H5'  DC A  60       7.540  -4.321  13.450  3.00  0.00           H  
ATOM   1921  H42  DC A  60       2.320 -10.691  16.900  3.00  0.00           H  
ATOM   1922 H2''  DC A  60       3.378  -6.828  11.350  3.00  0.00           H  
ATOM   1923 H5''  DC A  60       6.642  -3.361  12.180  9.00  0.00           H  
ATOM   1924  P    DT A  61       4.853  -6.044   8.570  4.00  0.00           P  
ATOM   1925  C5'  DT A  61       4.032  -8.569   8.810  1.00  0.00           C  
ATOM   1926  O5'  DT A  61       3.684  -7.185   8.700  5.00  0.00           O  
ATOM   1927  C4'  DT A  61       3.477  -9.363   7.640  1.00  0.00           C  
ATOM   1928  O4'  DT A  61       3.980 -10.675   7.640  7.00  0.00           O  
ATOM   1929  C3'  DT A  61       1.955  -9.394   7.370  7.00  0.00           C  
ATOM   1930  O3'  DT A  61       1.736  -9.068   5.960  0.00  0.00           O  
ATOM   1931  C2'  DT A  61       1.622 -10.865   7.670  3.00  0.00           C  
ATOM   1932  C1'  DT A  61       2.924 -11.438   7.100  0.00  0.00           C  
ATOM   1933  N1   DT A  61       3.132 -12.866   7.510  9.00  0.00           N  
ATOM   1934  C2   DT A  61       3.648 -13.785   6.530  4.00  0.00           C  
ATOM   1935  O2   DT A  61       3.681 -13.588   5.290  0.00  0.00           O  
ATOM   1936  N3   DT A  61       3.799 -15.046   7.050  7.00  0.00           N  
ATOM   1937  C4   DT A  61       3.488 -15.494   8.320  4.00  0.00           C  
ATOM   1938  O4   DT A  61       3.681 -16.703   8.730  4.00  0.00           O  
ATOM   1939  C5   DT A  61       3.090 -14.418   9.280  6.00  0.00           C  
ATOM   1940  C6   DT A  61       3.019 -13.156   8.860  8.00  0.00           C  
ATOM   1941  C7   DT A  61       2.651 -14.766  10.710  2.00  0.00           C  
ATOM   1942  OP1  DT A  61       5.757  -6.576   7.550  0.00  0.00           O  
ATOM   1943  OP2  DT A  61       4.107  -4.814   8.260  7.00  0.00           O1-
ATOM   1944  H3   DT A  61       4.067 -15.873   6.470  3.00  0.00           H  
ATOM   1945  H6   DT A  61       2.789 -12.352   9.600  3.00  0.00           H  
ATOM   1946  H1'  DT A  61       2.952 -11.413   6.040  5.00  0.00           H  
ATOM   1947  H2'  DT A  61       1.507 -11.041   8.750  1.00  0.00           H  
ATOM   1948  H3'  DT A  61       1.427  -8.695   8.030  2.00  0.00           H  
ATOM   1949  H4'  DT A  61       3.882  -8.881   6.790  3.00  0.00           H  
ATOM   1950  H5'  DT A  61       3.557  -8.835   9.750  0.00  0.00           H  
ATOM   1951  H71  DT A  61       3.573 -15.054  11.290  9.00  0.00           H  
ATOM   1952  H72  DT A  61       1.964 -15.637  10.670  8.00  0.00           H  
ATOM   1953  H73  DT A  61       2.110 -13.888  11.190  0.00  0.00           H  
ATOM   1954 H2''  DT A  61       0.759 -11.180   7.070  4.00  0.00           H  
ATOM   1955 H5''  DT A  61       5.098  -8.792   8.950  6.00  0.00           H  
ATOM   1956  P    DA A  62       0.324  -9.010   5.270  8.00  0.00           P  
ATOM   1957  C5'  DA A  62       1.337 -10.516   3.450  9.00  0.00           C  
ATOM   1958  O5'  DA A  62       0.345 -10.377   4.470  0.00  0.00           O  
ATOM   1959  C4'  DA A  62       1.050 -11.789   2.600  9.00  0.00           C  
ATOM   1960  O4'  DA A  62       1.362 -13.008   3.240  7.00  0.00           O  
ATOM   1961  C3'  DA A  62      -0.417 -12.034   2.150  9.00  0.00           C  
ATOM   1962  O3'  DA A  62      -0.350 -12.398   0.790  7.00  0.00           O  
ATOM   1963  C2'  DA A  62      -0.894 -13.318   2.850  3.00  0.00           C  
ATOM   1964  C1'  DA A  62       0.393 -14.020   3.310  7.00  0.00           C  
ATOM   1965  N1   DA A  62       0.727 -18.088   6.480  4.00  0.00           N  
ATOM   1966  C2   DA A  62       0.748 -17.988   5.150  9.00  0.00           C  
ATOM   1967  N3   DA A  62       0.560 -16.878   4.440  6.00  0.00           N  
ATOM   1968  C4   DA A  62       0.423 -15.771   5.210  6.00  0.00           C  
ATOM   1969  C5   DA A  62       0.411 -15.704   6.530  6.00  0.00           C  
ATOM   1970  C6   DA A  62       0.601 -16.921   7.210  1.00  0.00           C  
ATOM   1971  N6   DA A  62       0.524 -17.105   8.490  2.00  0.00           N  
ATOM   1972  N7   DA A  62       0.208 -14.368   6.940  5.00  0.00           N  
ATOM   1973  C8   DA A  62       0.127 -13.642   5.870  6.00  0.00           C  
ATOM   1974  N9   DA A  62       0.325 -14.448   4.770  1.00  0.00           N  
ATOM   1975  OP1  DA A  62       0.334  -7.932   4.270  2.00  0.00           O  
ATOM   1976  OP2  DA A  62      -0.837  -9.118   6.190  7.00  0.00           O1-
ATOM   1977  H2   DA A  62       0.897 -18.867   4.510  9.00  0.00           H  
ATOM   1978  H8   DA A  62      -0.056 -12.595   5.810  3.00  0.00           H  
ATOM   1979  H1'  DA A  62       0.707 -14.807   2.640  0.00  0.00           H  
ATOM   1980  H2'  DA A  62      -1.485 -12.988   3.680  1.00  0.00           H  
ATOM   1981  H3'  DA A  62      -1.088 -11.135   2.390  8.00  0.00           H  
ATOM   1982  H4'  DA A  62       1.687 -11.750   1.800  3.00  0.00           H  
ATOM   1983  H5'  DA A  62       2.386 -10.689   3.920  2.00  0.00           H  
ATOM   1984  H61  DA A  62       0.461 -18.127   8.790  4.00  0.00           H  
ATOM   1985  H62  DA A  62       0.278 -16.272   9.030  2.00  0.00           H  
ATOM   1986 H2''  DA A  62      -1.577 -13.905   2.330  1.00  0.00           H  
ATOM   1987 H5''  DA A  62       1.457  -9.685   2.810  0.00  0.00           H  
ATOM   1988  P    DA A  63      -0.100 -11.381  -0.410  0.00  0.00           P  
ATOM   1989  C5'  DA A  63      -2.560 -11.442  -1.430  3.00  0.00           C  
ATOM   1990  O5'  DA A  63      -1.566 -10.763  -0.680  2.00  0.00           O  
ATOM   1991  C4'  DA A  63      -4.116 -11.010  -1.240  8.00  0.00           C  
ATOM   1992  O4'  DA A  63      -4.566 -11.639  -0.080  4.00  0.00           O  
ATOM   1993  C3'  DA A  63      -4.408  -9.463  -1.220  0.00  0.00           C  
ATOM   1994  O3'  DA A  63      -5.476  -9.142  -2.090  5.00  0.00           O  
ATOM   1995  C2'  DA A  63      -4.786  -9.295   0.190  5.00  0.00           C  
ATOM   1996  C1'  DA A  63      -5.371 -10.665   0.570  9.00  0.00           C  
ATOM   1997  N1   DA A  63      -8.116 -10.904   4.860  5.00  0.00           N  
ATOM   1998  C2   DA A  63      -8.462 -10.700   3.660  1.00  0.00           C  
ATOM   1999  N3   DA A  63      -7.725 -10.723   2.570  7.00  0.00           N  
ATOM   2000  C4   DA A  63      -6.387 -11.048   2.830  3.00  0.00           C  
ATOM   2001  C5   DA A  63      -5.869 -11.400   4.080  4.00  0.00           C  
ATOM   2002  C6   DA A  63      -6.798 -11.278   5.120  0.00  0.00           C  
ATOM   2003  N6   DA A  63      -6.611 -11.495   6.410  2.00  0.00           N  
ATOM   2004  N7   DA A  63      -4.541 -11.587   4.030  3.00  0.00           N  
ATOM   2005  C8   DA A  63      -4.236 -11.314   2.770  3.00  0.00           C  
ATOM   2006  N9   DA A  63      -5.347 -11.086   1.970  2.00  0.00           N  
ATOM   2007  OP1  DA A  63       0.245 -12.172  -1.610  3.00  0.00           O  
ATOM   2008  OP2  DA A  63       0.828 -10.278  -0.000  5.00  0.00           O1-
ATOM   2009  H2   DA A  63      -9.399 -10.359   3.440  7.00  0.00           H  
ATOM   2010  H8   DA A  63      -3.244 -11.326   2.340  3.00  0.00           H  
ATOM   2011  H1'  DA A  63      -6.371 -10.739   0.100  5.00  0.00           H  
ATOM   2012  H2'  DA A  63      -3.943  -9.095   0.820  5.00  0.00           H  
ATOM   2013  H3'  DA A  63      -3.519  -8.974  -1.410  3.00  0.00           H  
ATOM   2014  H4'  DA A  63      -4.702 -11.410  -2.060  7.00  0.00           H  
ATOM   2015  H5'  DA A  63      -2.400 -12.502  -1.210  8.00  0.00           H  
ATOM   2016  H61  DA A  63      -7.341 -11.286   7.010  4.00  0.00           H  
ATOM   2017  H62  DA A  63      -5.746 -11.767   6.750  5.00  0.00           H  
ATOM   2018 H2''  DA A  63      -5.470  -8.515   0.320  8.00  0.00           H  
ATOM   2019 H5''  DA A  63      -2.310 -11.401  -2.450  3.00  0.00           H  
ATOM   2020  P    DC A  64      -5.372  -7.949  -3.110  3.00  0.00           P  
ATOM   2021  C5'  DC A  64      -6.776  -6.331  -1.610  5.00  0.00           C  
ATOM   2022  O5'  DC A  64      -5.506  -6.636  -2.220  3.00  0.00           O  
ATOM   2023  C4'  DC A  64      -6.675  -5.314  -0.460  0.00  0.00           C  
ATOM   2024  O4'  DC A  64      -5.934  -5.919   0.570  7.00  0.00           O  
ATOM   2025  C3'  DC A  64      -6.167  -3.944  -0.730  0.00  0.00           C  
ATOM   2026  O3'  DC A  64      -6.752  -2.969   0.110  4.00  0.00           O  
ATOM   2027  C2'  DC A  64      -4.730  -4.149  -0.390  9.00  0.00           C  
ATOM   2028  C1'  DC A  64      -4.762  -5.124   0.770  0.00  0.00           C  
ATOM   2029  N1   DC A  64      -3.534  -5.897   0.840  6.00  0.00           N  
ATOM   2030  C2   DC A  64      -3.027  -6.128   2.120  5.00  0.00           C  
ATOM   2031  O2   DC A  64      -3.447  -5.559   3.160  1.00  0.00           O  
ATOM   2032  N3   DC A  64      -1.984  -6.997   2.310  0.00  0.00           N  
ATOM   2033  C4   DC A  64      -1.455  -7.562   1.200  2.00  0.00           C  
ATOM   2034  N4   DC A  64      -0.506  -8.335   1.520  8.00  0.00           N  
ATOM   2035  C5   DC A  64      -1.855  -7.314  -0.100  4.00  0.00           C  
ATOM   2036  C6   DC A  64      -2.959  -6.494  -0.240  0.00  0.00           C  
ATOM   2037  OP1  DC A  64      -6.520  -8.110  -4.040  8.00  0.00           O  
ATOM   2038  OP2  DC A  64      -3.955  -7.989  -3.640  6.00  0.00           O1-
ATOM   2039  H5   DC A  64      -1.530  -7.697  -0.990  3.00  0.00           H  
ATOM   2040  H6   DC A  64      -3.329  -6.323  -1.280  6.00  0.00           H  
ATOM   2041  H1'  DC A  64      -4.884  -4.674   1.760  0.00  0.00           H  
ATOM   2042  H2'  DC A  64      -4.248  -4.561  -1.220  8.00  0.00           H  
ATOM   2043  H3'  DC A  64      -6.299  -3.717  -1.810  0.00  0.00           H  
ATOM   2044  H4'  DC A  64      -7.683  -5.266  -0.120  2.00  0.00           H  
ATOM   2045  H41  DC A  64      -0.250  -8.470   2.460  4.00  0.00           H  
ATOM   2046  H5'  DC A  64      -7.160  -7.337  -1.190  6.00  0.00           H  
ATOM   2047  H42  DC A  64       0.022  -8.747   0.720  6.00  0.00           H  
ATOM   2048 H2''  DC A  64      -4.188  -3.255  -0.100  5.00  0.00           H  
ATOM   2049 H5''  DC A  64      -7.489  -6.144  -2.360  4.00  0.00           H  
ATOM   2050  P    DC A  65      -6.510  -1.494  -0.020  0.00  0.00           P  
ATOM   2051  C5'  DC A  65      -5.347  -0.902   2.320  2.00  0.00           C  
ATOM   2052  O5'  DC A  65      -5.247  -1.224   0.920  2.00  0.00           O  
ATOM   2053  C4'  DC A  65      -4.020  -0.859   3.090  5.00  0.00           C  
ATOM   2054  O4'  DC A  65      -3.295  -2.090   2.740  2.00  0.00           O  
ATOM   2055  C3'  DC A  65      -3.109   0.397   2.780  8.00  0.00           C  
ATOM   2056  O3'  DC A  65      -2.495   0.959   3.960  6.00  0.00           O  
ATOM   2057  C2'  DC A  65      -2.082  -0.235   1.840  5.00  0.00           C  
ATOM   2058  C1'  DC A  65      -1.968  -1.587   2.530  0.00  0.00           C  
ATOM   2059  N1   DC A  65      -1.048  -2.631   2.040  1.00  0.00           N  
ATOM   2060  C2   DC A  65      -0.769  -3.646   2.900  9.00  0.00           C  
ATOM   2061  O2   DC A  65      -1.119  -3.633   4.090  5.00  0.00           O  
ATOM   2062  N3   DC A  65       0.043  -4.742   2.540  1.00  0.00           N  
ATOM   2063  C4   DC A  65       0.400  -4.736   1.230  7.00  0.00           C  
ATOM   2064  N4   DC A  65       1.077  -5.749   0.770  7.00  0.00           N  
ATOM   2065  C5   DC A  65      -0.096  -3.790   0.310  9.00  0.00           C  
ATOM   2066  C6   DC A  65      -0.800  -2.761   0.700  1.00  0.00           C  
ATOM   2067  OP1  DC A  65      -7.644  -0.796   0.610  9.00  0.00           O  
ATOM   2068  OP2  DC A  65      -6.139  -1.199  -1.400  6.00  0.00           O1-
ATOM   2069  H5   DC A  65       0.198  -3.849  -0.780  2.00  0.00           H  
ATOM   2070  H6   DC A  65      -0.951  -1.936  -0.000  8.00  0.00           H  
ATOM   2071  H1'  DC A  65      -1.639  -1.365   3.540  8.00  0.00           H  
ATOM   2072  H2'  DC A  65      -2.521  -0.380   0.750  8.00  0.00           H  
ATOM   2073  H3'  DC A  65      -3.641   1.179   2.190  7.00  0.00           H  
ATOM   2074  H4'  DC A  65      -4.313  -0.867   4.180  5.00  0.00           H  
ATOM   2075  H41  DC A  65       1.408  -6.455   1.470  4.00  0.00           H  
ATOM   2076  H5'  DC A  65      -5.987  -1.624   2.710  5.00  0.00           H  
ATOM   2077  H42  DC A  65       1.437  -5.732  -0.200  7.00  0.00           H  
ATOM   2078 H2''  DC A  65      -1.114   0.338   1.810  0.00  0.00           H  
ATOM   2079 H5''  DC A  65      -5.834   0.096   2.510  3.00  0.00           H  
ATOM   2080  P    DC A  66      -1.666   2.231   3.860  2.00  0.00           P  
ATOM   2081  C5'  DC A  66      -1.001   2.423   6.390  6.00  0.00           C  
ATOM   2082  O5'  DC A  66      -1.791   2.914   5.300  7.00  0.00           O  
ATOM   2083  C4'  DC A  66      -1.554   1.106   7.030  1.00  0.00           C  
ATOM   2084  O4'  DC A  66      -0.677   1.009   8.150  3.00  0.00           O  
ATOM   2085  C3'  DC A  66      -2.965   1.157   7.580  1.00  0.00           C  
ATOM   2086  O3'  DC A  66      -3.339  -0.177   7.900  6.00  0.00           O  
ATOM   2087  C2'  DC A  66      -2.800   2.065   8.800  1.00  0.00           C  
ATOM   2088  C1'  DC A  66      -1.420   1.560   9.360  3.00  0.00           C  
ATOM   2089  N1   DC A  66      -0.596   2.514  10.230  6.00  0.00           N  
ATOM   2090  C2   DC A  66      -1.077   2.866  11.550  6.00  0.00           C  
ATOM   2091  O2   DC A  66      -2.144   2.479  11.980  5.00  0.00           O  
ATOM   2092  N3   DC A  66      -0.359   3.697  12.340  1.00  0.00           N  
ATOM   2093  C4   DC A  66       0.727   4.203  11.840  4.00  0.00           C  
ATOM   2094  N4   DC A  66       1.244   5.087  12.640  1.00  0.00           N  
ATOM   2095  C5   DC A  66       1.317   3.859  10.600  8.00  0.00           C  
ATOM   2096  C6   DC A  66       0.613   3.031   9.830  5.00  0.00           C  
ATOM   2097  OP1  DC A  66      -2.369   3.136   2.930  7.00  0.00           O  
ATOM   2098  OP2  DC A  66      -0.239   1.742   3.530  6.00  0.00           O1-
ATOM   2099  H5   DC A  66       2.252   4.270  10.220  0.00  0.00           H  
ATOM   2100  H6   DC A  66       0.938   2.833   8.790  8.00  0.00           H  
ATOM   2101  H1'  DC A  66      -1.640   0.637   9.910  0.00  0.00           H  
ATOM   2102  H2'  DC A  66      -2.727   3.075   8.410  8.00  0.00           H  
ATOM   2103  H3'  DC A  66      -3.592   1.637   6.860  4.00  0.00           H  
ATOM   2104  H4'  DC A  66      -1.322   0.306   6.270  7.00  0.00           H  
ATOM   2105  H41  DC A  66       0.752   5.183  13.480  9.00  0.00           H  
ATOM   2106  H5'  DC A  66      -1.071   3.130   7.220  0.00  0.00           H  
ATOM   2107  H42  DC A  66       2.133   5.426  12.450  3.00  0.00           H  
ATOM   2108 H2''  DC A  66      -3.561   2.022   9.580  9.00  0.00           H  
ATOM   2109 H5''  DC A  66       0.011   2.381   5.990  2.00  0.00           H  
ATOM   2110  P    DT A  67      -4.841  -0.583   8.310  3.00  0.00           P  
ATOM   2111  C5'  DT A  67      -4.167  -0.583  10.900  0.00  0.00           C  
ATOM   2112  O5'  DT A  67      -5.035  -0.093   9.880  8.00  0.00           O  
ATOM   2113  C4'  DT A  67      -5.008  -0.736  12.160  5.00  0.00           C  
ATOM   2114  O4'  DT A  67      -4.046  -1.007  13.170  5.00  0.00           O  
ATOM   2115  C3'  DT A  67      -5.847   0.535  12.540  1.00  0.00           C  
ATOM   2116  O3'  DT A  67      -7.023  -0.093  13.020  5.00  0.00           O  
ATOM   2117  C2'  DT A  67      -4.943   1.039  13.630  6.00  0.00           C  
ATOM   2118  C1'  DT A  67      -4.163  -0.111  14.240  0.00  0.00           C  
ATOM   2119  N1   DT A  67      -2.787   0.224  14.660  6.00  0.00           N  
ATOM   2120  C2   DT A  67      -2.728   0.741  15.960  7.00  0.00           C  
ATOM   2121  O2   DT A  67      -3.689   0.788  16.730  1.00  0.00           O  
ATOM   2122  N3   DT A  67      -1.499   1.161  16.370  9.00  0.00           N  
ATOM   2123  C4   DT A  67      -0.419   1.273  15.600  4.00  0.00           C  
ATOM   2124  O4   DT A  67       0.620   1.770  16.020  7.00  0.00           O  
ATOM   2125  C5   DT A  67      -0.503   0.651  14.320  2.00  0.00           C  
ATOM   2126  C6   DT A  67      -1.707   0.175  13.820  4.00  0.00           C  
ATOM   2127  C7   DT A  67       0.717   0.668  13.460  3.00  0.00           C  
ATOM   2128  OP1  DT A  67      -4.878  -2.071   8.400  2.00  0.00           O  
ATOM   2129  OP2  DT A  67      -5.903   0.039   7.460  0.00  0.00           O1-
ATOM   2130  H3   DT A  67      -1.383   1.547  17.330  5.00  0.00           H  
ATOM   2131  H6   DT A  67      -1.724  -0.366  12.900  2.00  0.00           H  
ATOM   2132  H1'  DT A  67      -4.735  -0.492  15.080  5.00  0.00           H  
ATOM   2133  H2'  DT A  67      -4.144   1.651  13.130  6.00  0.00           H  
ATOM   2134  H3'  DT A  67      -6.020   1.210  11.710  5.00  0.00           H  
ATOM   2135  H4'  DT A  67      -5.741  -1.578  12.060  6.00  0.00           H  
ATOM   2136  H5'  DT A  67      -3.214  -0.001  10.990  6.00  0.00           H  
ATOM   2137  H71  DT A  67       1.320  -0.196  13.740  6.00  0.00           H  
ATOM   2138  H72  DT A  67       1.263   1.687  13.500  2.00  0.00           H  
ATOM   2139  H73  DT A  67       0.394   0.369  12.470  7.00  0.00           H  
ATOM   2140 H2''  DT A  67      -5.489   1.582  14.440  7.00  0.00           H  
ATOM   2141 H5''  DT A  67      -3.825  -1.495  10.440  0.00  0.00           H  
ATOM   2142  P    DA A  68      -8.400   0.628  12.860  4.00  0.00           P  
ATOM   2143  C5'  DA A  68     -10.213  -0.237  14.560  2.00  0.00           C  
ATOM   2144  O5'  DA A  68      -9.488  -0.373  13.420  5.00  0.00           O  
ATOM   2145  C4'  DA A  68     -11.204  -1.413  14.900  6.00  0.00           C  
ATOM   2146  O4'  DA A  68     -11.972  -1.765  13.800  1.00  0.00           O  
ATOM   2147  C3'  DA A  68     -10.395  -2.659  15.290  1.00  0.00           C  
ATOM   2148  O3'  DA A  68     -11.116  -3.547  16.190  8.00  0.00           O  
ATOM   2149  C2'  DA A  68     -10.308  -3.420  14.010  1.00  0.00           C  
ATOM   2150  C1'  DA A  68     -11.655  -3.144  13.270  4.00  0.00           C  
ATOM   2151  N1   DA A  68     -13.231  -6.141   9.560  7.00  0.00           N  
ATOM   2152  C2   DA A  68     -13.110  -6.297  10.860  1.00  0.00           C  
ATOM   2153  N3   DA A  68     -12.607  -5.480  11.790  4.00  0.00           N  
ATOM   2154  C4   DA A  68     -12.189  -4.341  11.180  2.00  0.00           C  
ATOM   2155  C5   DA A  68     -12.245  -4.056   9.870  8.00  0.00           C  
ATOM   2156  C6   DA A  68     -12.836  -5.008   9.050  0.00  0.00           C  
ATOM   2157  N6   DA A  68     -13.127  -4.885   7.790  0.00  0.00           N  
ATOM   2158  N7   DA A  68     -11.586  -2.845   9.660  2.00  0.00           N  
ATOM   2159  C8   DA A  68     -11.297  -2.457  10.810  7.00  0.00           C  
ATOM   2160  N9   DA A  68     -11.638  -3.289  11.830  3.00  0.00           N  
ATOM   2161  OP1  DA A  68      -8.559   0.808  11.360  5.00  0.00           O  
ATOM   2162  OP2  DA A  68      -8.324   1.748  13.810  1.00  0.00           O1-
ATOM   2163  H2   DA A  68     -13.374  -7.169  11.280  6.00  0.00           H  
ATOM   2164  H8   DA A  68     -10.853  -1.505  10.970  3.00  0.00           H  
ATOM   2165  H1'  DA A  68     -12.396  -3.828  13.670  9.00  0.00           H  
ATOM   2166  H2'  DA A  68      -9.426  -3.142  13.460  2.00  0.00           H  
ATOM   2167  H3'  DA A  68      -9.375  -2.432  15.730  1.00  0.00           H  
ATOM   2168  H4'  DA A  68     -11.770  -1.192  15.830  3.00  0.00           H  
ATOM   2169  H5'  DA A  68     -10.867   0.693  14.600  4.00  0.00           H  
ATOM   2170  H61  DA A  68     -13.155  -5.774   7.260  3.00  0.00           H  
ATOM   2171  H62  DA A  68     -12.989  -4.035   7.320  0.00  0.00           H  
ATOM   2172 H2''  DA A  68     -10.180  -4.526  14.200  0.00  0.00           H  
ATOM   2173 H5''  DA A  68      -9.575  -0.069  15.390  8.00  0.00           H  
ATOM   2174  P    DA A  69     -11.015  -3.471  17.720  7.00  0.00           P  
ATOM   2175  C5'  DA A  69      -9.766  -5.811  18.140  9.00  0.00           C  
ATOM   2176  O5'  DA A  69      -9.783  -4.356  18.120  9.00  0.00           O  
ATOM   2177  C4'  DA A  69      -8.456  -6.485  18.710  8.00  0.00           C  
ATOM   2178  O4'  DA A  69      -8.504  -7.884  18.450  2.00  0.00           O  
ATOM   2179  C3'  DA A  69      -7.156  -5.941  18.130  6.00  0.00           C  
ATOM   2180  O3'  DA A  69      -6.026  -5.980  18.990  6.00  0.00           O  
ATOM   2181  C2'  DA A  69      -6.976  -6.991  17.030  0.00  0.00           C  
ATOM   2182  C1'  DA A  69      -7.402  -8.265  17.690  1.00  0.00           C  
ATOM   2183  N1   DA A  69      -6.630 -13.135  16.230  0.00  0.00           N  
ATOM   2184  C2   DA A  69      -6.023 -12.396  17.190  2.00  0.00           C  
ATOM   2185  N3   DA A  69      -6.298 -11.146  17.570  0.00  0.00           N  
ATOM   2186  C4   DA A  69      -7.293 -10.663  16.720  4.00  0.00           C  
ATOM   2187  C5   DA A  69      -7.937 -11.214  15.660  3.00  0.00           C  
ATOM   2188  C6   DA A  69      -7.584 -12.582  15.480  5.00  0.00           C  
ATOM   2189  N6   DA A  69      -8.104 -13.430  14.570  0.00  0.00           N  
ATOM   2190  N7   DA A  69      -8.822 -10.322  15.060  7.00  0.00           N  
ATOM   2191  C8   DA A  69      -8.810  -9.248  15.830  6.00  0.00           C  
ATOM   2192  N9   DA A  69      -7.801  -9.388  16.740  9.00  0.00           N  
ATOM   2193  OP1  DA A  69     -12.189  -4.066  18.350  1.00  0.00           O  
ATOM   2194  OP2  DA A  69     -10.750  -2.064  18.080  5.00  0.00           O1-
ATOM   2195  H2   DA A  69      -5.375 -12.869  17.800  2.00  0.00           H  
ATOM   2196  H8   DA A  69      -9.383  -8.321  15.700  5.00  0.00           H  
ATOM   2197  H1'  DA A  69      -6.602  -8.576  18.360  7.00  0.00           H  
ATOM   2198  H2'  DA A  69      -7.650  -6.867  16.150  1.00  0.00           H  
ATOM   2199  H3'  DA A  69      -7.192  -4.953  17.660  7.00  0.00           H  
ATOM   2200  H4'  DA A  69      -8.362  -6.278  19.750  7.00  0.00           H  
ATOM   2201  H5'  DA A  69      -9.837  -6.182  17.090  0.00  0.00           H  
ATOM   2202  H61  DA A  69      -7.877 -14.460  14.500  5.00  0.00           H  
ATOM   2203  H62  DA A  69      -8.741 -12.996  13.950  6.00  0.00           H  
ATOM   2204 H2''  DA A  69      -5.940  -7.108  16.740  1.00  0.00           H  
ATOM   2205 H5''  DA A  69     -10.631  -6.073  18.780  4.00  0.00           H  
ATOM   2206  P    DC A  70      -4.882  -4.877  18.980  0.00  0.00           P  
ATOM   2207  C5'  DC A  70      -4.505  -4.672  16.290  9.00  0.00           C  
ATOM   2208  O5'  DC A  70      -4.055  -5.155  17.590  1.00  0.00           O  
ATOM   2209  C4'  DC A  70      -3.546  -3.636  15.660  9.00  0.00           C  
ATOM   2210  O4'  DC A  70      -3.200  -2.590  16.590  7.00  0.00           O  
ATOM   2211  C3'  DC A  70      -2.148  -4.256  15.270  8.00  0.00           C  
ATOM   2212  O3'  DC A  70      -1.590  -3.573  14.230  5.00  0.00           O  
ATOM   2213  C2'  DC A  70      -1.345  -3.949  16.470  5.00  0.00           C  
ATOM   2214  C1'  DC A  70      -1.778  -2.507  16.670  2.00  0.00           C  
ATOM   2215  N1   DC A  70      -1.432  -1.976  18.020  0.00  0.00           N  
ATOM   2216  C2   DC A  70      -0.164  -1.414  18.180  8.00  0.00           C  
ATOM   2217  O2   DC A  70       0.677  -1.402  17.270  8.00  0.00           O  
ATOM   2218  N3   DC A  70       0.195  -0.841  19.340  8.00  0.00           N  
ATOM   2219  C4   DC A  70      -0.654  -0.831  20.370  1.00  0.00           C  
ATOM   2220  N4   DC A  70      -0.293  -0.132  21.380  0.00  0.00           N  
ATOM   2221  C5   DC A  70      -1.867  -1.520  20.250  6.00  0.00           C  
ATOM   2222  C6   DC A  70      -2.280  -2.081  19.080  0.00  0.00           C  
ATOM   2223  OP1  DC A  70      -4.104  -5.243  20.200  2.00  0.00           O  
ATOM   2224  OP2  DC A  70      -5.472  -3.510  18.850  3.00  0.00           O1-
ATOM   2225  H5   DC A  70      -2.501  -1.609  21.120  2.00  0.00           H  
ATOM   2226  H6   DC A  70      -3.218  -2.559  18.970  7.00  0.00           H  
ATOM   2227  H1'  DC A  70      -1.412  -1.823  15.870  6.00  0.00           H  
ATOM   2228  H2'  DC A  70      -1.710  -4.559  17.320  7.00  0.00           H  
ATOM   2229  H3'  DC A  70      -2.118  -5.343  15.090  5.00  0.00           H  
ATOM   2230  H4'  DC A  70      -4.185  -3.236  14.800  6.00  0.00           H  
ATOM   2231  H41  DC A  70       0.636   0.318  21.220  8.00  0.00           H  
ATOM   2232  H5'  DC A  70      -5.496  -4.252  16.360  3.00  0.00           H  
ATOM   2233  H42  DC A  70      -0.977   0.129  22.070  0.00  0.00           H  
ATOM   2234 H2''  DC A  70      -0.237  -3.982  16.370  9.00  0.00           H  
ATOM   2235 H5''  DC A  70      -4.524  -5.580  15.680  8.00  0.00           H  
ATOM   2236  P    DC A  71      -1.096  -4.359  12.980  2.00  0.00           P  
ATOM   2237  C5'  DC A  71      -3.438  -4.246  11.730  3.00  0.00           C  
ATOM   2238  O5'  DC A  71      -2.397  -5.026  12.370  2.00  0.00           O  
ATOM   2239  C4'  DC A  71      -4.222  -4.807  10.550  3.00  0.00           C  
ATOM   2240  O4'  DC A  71      -3.571  -4.529   9.300  2.00  0.00           O  
ATOM   2241  C3'  DC A  71      -4.479  -6.342  10.610  1.00  0.00           C  
ATOM   2242  O3'  DC A  71      -5.656  -6.682   9.930  3.00  0.00           O  
ATOM   2243  C2'  DC A  71      -3.220  -6.847   9.870  1.00  0.00           C  
ATOM   2244  C1'  DC A  71      -3.024  -5.766   8.890  5.00  0.00           C  
ATOM   2245  N1   DC A  71      -1.622  -5.642   8.360  3.00  0.00           N  
ATOM   2246  C2   DC A  71      -1.430  -5.721   6.980  6.00  0.00           C  
ATOM   2247  O2   DC A  71      -2.361  -5.766   6.170  0.00  0.00           O  
ATOM   2248  N3   DC A  71      -0.191  -5.790   6.530  5.00  0.00           N  
ATOM   2249  C4   DC A  71       0.811  -5.823   7.400  1.00  0.00           C  
ATOM   2250  N4   DC A  71       1.943  -5.821   6.880  3.00  0.00           N  
ATOM   2251  C5   DC A  71       0.643  -5.575   8.790  2.00  0.00           C  
ATOM   2252  C6   DC A  71      -0.598  -5.502   9.230  6.00  0.00           C  
ATOM   2253  OP1  DC A  71      -0.238  -5.457  13.420  7.00  0.00           O  
ATOM   2254  OP2  DC A  71      -0.390  -3.554  11.970  5.00  0.00           O1-
ATOM   2255  H5   DC A  71       1.404  -5.458   9.600  4.00  0.00           H  
ATOM   2256  H6   DC A  71      -0.796  -5.384  10.300  0.00  0.00           H  
ATOM   2257  H1'  DC A  71      -3.604  -5.989   8.020  3.00  0.00           H  
ATOM   2258  H2'  DC A  71      -2.383  -6.946  10.530  2.00  0.00           H  
ATOM   2259  H3'  DC A  71      -4.505  -6.678  11.640  0.00  0.00           H  
ATOM   2260  H4'  DC A  71      -5.237  -4.366  10.410  2.00  0.00           H  
ATOM   2261  H41  DC A  71       2.052  -5.754   5.970  0.00  0.00           H  
ATOM   2262  H5'  DC A  71      -3.149  -3.181  11.580  7.00  0.00           H  
ATOM   2263  H42  DC A  71       2.759  -5.638   7.430  2.00  0.00           H  
ATOM   2264 H2''  DC A  71      -3.425  -7.782   9.370  2.00  0.00           H  
ATOM   2265 H5''  DC A  71      -4.189  -4.193  12.500  0.00  0.00           H  
ATOM   2266  P    DC A  72      -6.992  -6.943  10.730  5.00  0.00           P  
ATOM   2267  C5'  DC A  72      -8.781  -5.966   9.090  2.00  0.00           C  
ATOM   2268  O5'  DC A  72      -8.174  -7.037   9.640  7.00  0.00           O  
ATOM   2269  C4'  DC A  72      -9.475  -6.264   7.720  9.00  0.00           C  
ATOM   2270  O4'  DC A  72      -8.442  -6.066   6.780  5.00  0.00           O  
ATOM   2271  C3'  DC A  72     -10.119  -7.661   7.610  5.00  0.00           C  
ATOM   2272  O3'  DC A  72     -11.366  -7.487   6.840  5.00  0.00           O  
ATOM   2273  C2'  DC A  72      -9.020  -8.358   6.880  4.00  0.00           C  
ATOM   2274  C1'  DC A  72      -8.348  -7.284   5.990  2.00  0.00           C  
ATOM   2275  N1   DC A  72      -6.950  -7.628   5.650  8.00  0.00           N  
ATOM   2276  C2   DC A  72      -6.507  -7.545   4.310  7.00  0.00           C  
ATOM   2277  O2   DC A  72      -7.213  -7.009   3.450  0.00  0.00           O  
ATOM   2278  N3   DC A  72      -5.297  -8.007   4.040  2.00  0.00           N  
ATOM   2279  C4   DC A  72      -4.440  -8.302   5.020  2.00  0.00           C  
ATOM   2280  N4   DC A  72      -3.246  -8.657   4.610  7.00  0.00           N  
ATOM   2281  C5   DC A  72      -4.819  -8.172   6.390  7.00  0.00           C  
ATOM   2282  C6   DC A  72      -6.083  -7.822   6.710  0.00  0.00           C  
ATOM   2283  OP1  DC A  72      -7.258  -5.683  11.500  9.00  0.00           O  
ATOM   2284  OP2  DC A  72      -6.936  -8.272  11.430  2.00  0.00           O1-
ATOM   2285  H5   DC A  72      -4.030  -8.354   7.150  3.00  0.00           H  
ATOM   2286  H6   DC A  72      -6.395  -7.616   7.680  4.00  0.00           H  
ATOM   2287  H1'  DC A  72      -8.983  -7.208   5.070  5.00  0.00           H  
ATOM   2288  H2'  DC A  72      -8.332  -8.861   7.630  0.00  0.00           H  
ATOM   2289  H3'  DC A  72     -10.307  -8.154   8.520  8.00  0.00           H  
ATOM   2290  H4'  DC A  72     -10.150  -5.425   7.660  0.00  0.00           H  
ATOM   2291  H41  DC A  72      -3.068  -8.482   3.640  6.00  0.00           H  
ATOM   2292  H5'  DC A  72      -8.097  -5.179   8.940  5.00  0.00           H  
ATOM   2293  H42  DC A  72      -2.548  -8.859   5.310  0.00  0.00           H  
ATOM   2294 H2''  DC A  72      -9.416  -9.198   6.430  0.00  0.00           H  
ATOM   2295 H5''  DC A  72      -9.544  -5.705   9.790  5.00  0.00           H  
ATOM   2296  P    DT A  73     -12.139  -8.724   5.970  1.00  0.00           P  
ATOM   2297  C5'  DT A  73     -12.796 -10.083   8.110  0.00  0.00           C  
ATOM   2298  O5'  DT A  73     -12.099 -10.028   6.900  2.00  0.00           O  
ATOM   2299  C4'  DT A  73     -12.442 -11.232   9.060  1.00  0.00           C  
ATOM   2300  O4'  DT A  73     -12.696 -12.454   8.340  6.00  0.00           O  
ATOM   2301  C3'  DT A  73     -10.964 -11.361   9.530  9.00  0.00           C  
ATOM   2302  O3'  DT A  73     -11.177 -11.924  10.810  6.00  0.00           O  
ATOM   2303  C2'  DT A  73     -10.395 -12.301   8.470  8.00  0.00           C  
ATOM   2304  C1'  DT A  73     -11.538 -13.270   8.430  4.00  0.00           C  
ATOM   2305  N1   DT A  73     -11.402 -14.196   7.280  9.00  0.00           N  
ATOM   2306  C2   DT A  73     -11.538 -15.608   7.550  1.00  0.00           C  
ATOM   2307  O2   DT A  73     -12.077 -16.094   8.530  8.00  0.00           O  
ATOM   2308  N3   DT A  73     -11.179 -16.444   6.500  3.00  0.00           N  
ATOM   2309  C4   DT A  73     -10.792 -16.091   5.260  3.00  0.00           C  
ATOM   2310  O4   DT A  73     -10.660 -17.016   4.480  4.00  0.00           O  
ATOM   2311  C5   DT A  73     -10.594 -14.655   5.090  1.00  0.00           C  
ATOM   2312  C6   DT A  73     -10.887 -13.756   6.050  7.00  0.00           C  
ATOM   2313  C7   DT A  73     -10.026 -14.152   3.770  0.00  0.00           C  
ATOM   2314  OP1  DT A  73     -11.489  -8.978   4.690  4.00  0.00           O  
ATOM   2315  OP2  DT A  73     -13.565  -8.380   5.940  4.00  0.00           O1-
ATOM   2316  H3   DT A  73     -11.469 -17.334   6.560  9.00  0.00           H  
ATOM   2317  H6   DT A  73     -10.782 -12.681   5.890  2.00  0.00           H  
ATOM   2318  H1'  DT A  73     -11.617 -13.700   9.380  4.00  0.00           H  
ATOM   2319  H2'  DT A  73     -10.207 -11.674   7.580  5.00  0.00           H  
ATOM   2320  H3'  DT A  73     -10.357 -10.486   9.500  0.00  0.00           H  
ATOM   2321  H4'  DT A  73     -13.106 -11.059   9.930  7.00  0.00           H  
ATOM   2322  H5'  DT A  73     -13.893 -10.080   7.890  0.00  0.00           H  
ATOM   2323  H71  DT A  73     -10.558 -14.517   2.890  3.00  0.00           H  
ATOM   2324  H72  DT A  73      -9.943 -13.050   3.680  6.00  0.00           H  
ATOM   2325  H73  DT A  73      -9.049 -14.625   3.800  5.00  0.00           H  
ATOM   2326 H2''  DT A  73      -9.540 -12.823   8.780  5.00  0.00           H  
ATOM   2327 H5''  DT A  73     -12.543  -9.188   8.760  7.00  0.00           H  
ATOM   2328  P    DA A  74     -10.072 -11.975  11.960  3.00  0.00           P  
ATOM   2329  C5'  DA A  74     -10.166 -14.566  11.530  7.00  0.00           C  
ATOM   2330  O5'  DA A  74      -9.452 -13.357  11.500  5.00  0.00           O  
ATOM   2331  C4'  DA A  74      -9.419 -15.817  11.030  6.00  0.00           C  
ATOM   2332  O4'  DA A  74      -9.207 -15.679   9.620  6.00  0.00           O  
ATOM   2333  C3'  DA A  74      -7.928 -15.861  11.620  3.00  0.00           C  
ATOM   2334  O3'  DA A  74      -7.780 -17.057  12.350  7.00  0.00           O  
ATOM   2335  C2'  DA A  74      -6.981 -15.801  10.340  2.00  0.00           C  
ATOM   2336  C1'  DA A  74      -7.984 -16.300   9.350  2.00  0.00           C  
ATOM   2337  N1   DA A  74      -6.714 -18.694   5.070  8.00  0.00           N  
ATOM   2338  C2   DA A  74      -7.120 -19.106   6.240  0.00  0.00           C  
ATOM   2339  N3   DA A  74      -7.504 -18.401   7.240  1.00  0.00           N  
ATOM   2340  C4   DA A  74      -7.433 -17.066   7.000  3.00  0.00           C  
ATOM   2341  C5   DA A  74      -6.964 -16.451   5.860  0.00  0.00           C  
ATOM   2342  C6   DA A  74      -6.697 -17.389   4.860  8.00  0.00           C  
ATOM   2343  N6   DA A  74      -6.399 -17.112   3.590  9.00  0.00           N  
ATOM   2344  N7   DA A  74      -6.842 -15.058   6.070  8.00  0.00           N  
ATOM   2345  C8   DA A  74      -7.154 -14.872   7.290  1.00  0.00           C  
ATOM   2346  N9   DA A  74      -7.589 -16.022   7.900  8.00  0.00           N  
ATOM   2347  OP1  DA A  74     -10.702 -12.106  13.280  1.00  0.00           O  
ATOM   2348  OP2  DA A  74      -9.124 -10.833  11.700  4.00  0.00           O1-
ATOM   2349  H2   DA A  74      -7.166 -20.154   6.450  5.00  0.00           H  
ATOM   2350  H8   DA A  74      -7.130 -13.922   7.740  9.00  0.00           H  
ATOM   2351  H1'  DA A  74      -7.989 -17.455   9.430  1.00  0.00           H  
ATOM   2352  H2'  DA A  74      -6.650 -14.779  10.190  8.00  0.00           H  
ATOM   2353  H3'  DA A  74      -7.779 -15.033  12.330  6.00  0.00           H  
ATOM   2354  H4'  DA A  74     -10.027 -16.735  11.250  3.00  0.00           H  
ATOM   2355  H5'  DA A  74     -11.100 -14.631  10.990  9.00  0.00           H  
ATOM   2356  H61  DA A  74      -5.881 -17.855   3.070  1.00  0.00           H  
ATOM   2357  H62  DA A  74      -6.440 -16.184   3.220  3.00  0.00           H  
ATOM   2358 H2''  DA A  74      -6.186 -16.595  10.410  2.00  0.00           H  
ATOM   2359 H5''  DA A  74     -10.353 -14.810  12.550  8.00  0.00           H  
ATOM   2360  P    DA A  75      -6.944 -17.172  13.730  9.00  0.00           P  
ATOM   2361  C5'  DA A  75      -4.669 -18.099  13.000  0.00  0.00           C  
ATOM   2362  O5'  DA A  75      -5.429 -16.951  13.310  4.00  0.00           O  
ATOM   2363  C4'  DA A  75      -3.426 -17.719  12.260  0.00  0.00           C  
ATOM   2364  O4'  DA A  75      -3.783 -17.322  10.960  3.00  0.00           O  
ATOM   2365  C3'  DA A  75      -2.496 -16.690  12.760  2.00  0.00           C  
ATOM   2366  O3'  DA A  75      -1.159 -17.172  12.620  0.00  0.00           O  
ATOM   2367  C2'  DA A  75      -2.687 -15.535  11.820  0.00  0.00           C  
ATOM   2368  C1'  DA A  75      -2.908 -16.331  10.550  3.00  0.00           C  
ATOM   2369  N1   DA A  75      -3.140 -16.420   5.450  3.00  0.00           N  
ATOM   2370  C2   DA A  75      -2.970 -17.376   6.380  1.00  0.00           C  
ATOM   2371  N3   DA A  75      -3.014 -17.244   7.650  9.00  0.00           N  
ATOM   2372  C4   DA A  75      -3.429 -16.015   8.060  1.00  0.00           C  
ATOM   2373  C5   DA A  75      -3.776 -14.982   7.260  5.00  0.00           C  
ATOM   2374  C6   DA A  75      -3.596 -15.249   5.860  2.00  0.00           C  
ATOM   2375  N6   DA A  75      -3.747 -14.408   4.840  0.00  0.00           N  
ATOM   2376  N7   DA A  75      -4.268 -13.903   8.030  4.00  0.00           N  
ATOM   2377  C8   DA A  75      -4.094 -14.360   9.240  6.00  0.00           C  
ATOM   2378  N9   DA A  75      -3.489 -15.567   9.350  7.00  0.00           N  
ATOM   2379  OP1  DA A  75      -7.188 -18.565  14.210  3.00  0.00           O  
ATOM   2380  OP2  DA A  75      -7.365 -16.054  14.600  2.00  0.00           O1-
ATOM   2381  H2   DA A  75      -2.412 -18.248   5.980  0.00  0.00           H  
ATOM   2382  H8   DA A  75      -4.439 -13.824  10.150  3.00  0.00           H  
ATOM   2383  H1'  DA A  75      -1.943 -16.732  10.300  4.00  0.00           H  
ATOM   2384  H2'  DA A  75      -3.583 -14.913  12.010  4.00  0.00           H  
ATOM   2385  H3'  DA A  75      -2.726 -16.388  13.740  4.00  0.00           H  
ATOM   2386  H4'  DA A  75      -2.913 -18.705  12.180  5.00  0.00           H  
ATOM   2387  H5'  DA A  75      -5.251 -18.888  12.560  6.00  0.00           H  
ATOM   2388  H61  DA A  75      -3.647 -14.802   4.000  0.00  0.00           H  
ATOM   2389  H62  DA A  75      -4.102 -13.481   5.080  0.00  0.00           H  
ATOM   2390 H2''  DA A  75      -1.775 -14.966  11.750  4.00  0.00           H  
ATOM   2391 H5''  DA A  75      -4.395 -18.589  13.950  8.00  0.00           H  
ATOM   2392  P    DC A  76      -0.365 -18.007  13.780  8.00  0.00           P  
ATOM   2393  C5'  DC A  76       0.546 -15.676  14.590  6.00  0.00           C  
ATOM   2394  O5'  DC A  76      -0.178 -16.850  14.880  1.00  0.00           O  
ATOM   2395  C4'  DC A  76       0.232 -14.576  15.680  1.00  0.00           C  
ATOM   2396  O4'  DC A  76       0.900 -13.425  15.200  5.00  0.00           O  
ATOM   2397  C3'  DC A  76      -1.245 -14.273  15.740  6.00  0.00           C  
ATOM   2398  O3'  DC A  76      -1.754 -14.138  17.050  8.00  0.00           O  
ATOM   2399  C2'  DC A  76      -1.321 -12.997  14.870  9.00  0.00           C  
ATOM   2400  C1'  DC A  76      -0.003 -12.275  15.180  7.00  0.00           C  
ATOM   2401  N1   DC A  76       0.375 -11.240  14.190  7.00  0.00           N  
ATOM   2402  C2   DC A  76      -0.007  -9.916  14.560  5.00  0.00           C  
ATOM   2403  O2   DC A  76      -0.405  -9.631  15.660  4.00  0.00           O  
ATOM   2404  N3   DC A  76       0.004  -8.866  13.710  7.00  0.00           N  
ATOM   2405  C4   DC A  76       0.436  -9.155  12.460  2.00  0.00           C  
ATOM   2406  N4   DC A  76       0.536  -8.148  11.660  8.00  0.00           N  
ATOM   2407  C5   DC A  76       0.904 -10.454  12.080  0.00  0.00           C  
ATOM   2408  C6   DC A  76       0.932 -11.475  12.950  8.00  0.00           C  
ATOM   2409  OP1  DC A  76       0.907 -18.433  13.120  7.00  0.00           O  
ATOM   2410  OP2  DC A  76      -1.250 -19.052  14.310  9.00  0.00           O1-
ATOM   2411  H5   DC A  76       1.266 -10.731  11.050  4.00  0.00           H  
ATOM   2412  H6   DC A  76       1.113 -12.413  12.650  4.00  0.00           H  
ATOM   2413  H1'  DC A  76      -0.041 -11.775  16.210  4.00  0.00           H  
ATOM   2414  H2'  DC A  76      -1.405 -13.190  13.750  0.00  0.00           H  
ATOM   2415  H3'  DC A  76      -1.812 -15.061  15.350  2.00  0.00           H  
ATOM   2416  H4'  DC A  76       0.561 -14.773  16.710  5.00  0.00           H  
ATOM   2417  H41  DC A  76       0.426  -7.265  12.120  5.00  0.00           H  
ATOM   2418  H5'  DC A  76       0.264 -15.301  13.600  1.00  0.00           H  
ATOM   2419  H42  DC A  76       0.879  -8.302  10.740  1.00  0.00           H  
ATOM   2420 H2''  DC A  76      -2.131 -12.392  15.250  1.00  0.00           H  
ATOM   2421 H5''  DC A  76       1.674 -15.686  14.420  3.00  0.00           H  
ATOM   2422  P    DC A  77      -2.846 -15.220  17.530  8.00  0.00           P  
ATOM   2423  C5'  DC A  77      -2.678 -15.165  20.160  3.00  0.00           C  
ATOM   2424  O5'  DC A  77      -3.299 -14.803  18.990  4.00  0.00           O  
ATOM   2425  C4'  DC A  77      -2.761 -13.964  21.120  6.00  0.00           C  
ATOM   2426  O4'  DC A  77      -2.411 -12.778  20.500  9.00  0.00           O  
ATOM   2427  C3'  DC A  77      -4.196 -13.788  21.700  1.00  0.00           C  
ATOM   2428  O3'  DC A  77      -4.143 -13.496  23.020  1.00  0.00           O  
ATOM   2429  C2'  DC A  77      -4.697 -12.588  20.880  7.00  0.00           C  
ATOM   2430  C1'  DC A  77      -3.440 -11.760  20.720  4.00  0.00           C  
ATOM   2431  N1   DC A  77      -3.513 -10.921  19.460  1.00  0.00           N  
ATOM   2432  C2   DC A  77      -4.043  -9.680  19.680  1.00  0.00           C  
ATOM   2433  O2   DC A  77      -4.500  -9.294  20.740  6.00  0.00           O  
ATOM   2434  N3   DC A  77      -4.183  -8.776  18.720  7.00  0.00           N  
ATOM   2435  C4   DC A  77      -3.653  -9.018  17.610  7.00  0.00           C  
ATOM   2436  N4   DC A  77      -3.693  -8.061  16.770  7.00  0.00           N  
ATOM   2437  C5   DC A  77      -3.174 -10.300  17.170  6.00  0.00           C  
ATOM   2438  C6   DC A  77      -3.171 -11.248  18.160  0.00  0.00           C  
ATOM   2439  OP1  DC A  77      -2.095 -16.517  17.580  5.00  0.00           O  
ATOM   2440  OP2  DC A  77      -4.022 -15.131  16.620  9.00  0.00           O1-
ATOM   2441  H5   DC A  77      -2.943 -10.417  16.130  2.00  0.00           H  
ATOM   2442  H6   DC A  77      -2.960 -12.246  17.940  4.00  0.00           H  
ATOM   2443  H1'  DC A  77      -3.183 -11.218  21.700  2.00  0.00           H  
ATOM   2444  H2'  DC A  77      -5.064 -12.880  19.950  7.00  0.00           H  
ATOM   2445  H3'  DC A  77      -4.787 -14.727  21.420  0.00  0.00           H  
ATOM   2446  H4'  DC A  77      -2.071 -14.182  21.920  4.00  0.00           H  
ATOM   2447  H41  DC A  77      -3.912  -7.164  17.170  5.00  0.00           H  
ATOM   2448  H5'  DC A  77      -1.650 -15.453  20.000  2.00  0.00           H  
ATOM   2449  H42  DC A  77      -3.132  -8.023  15.940  2.00  0.00           H  
ATOM   2450 H2''  DC A  77      -5.516 -12.125  21.410  5.00  0.00           H  
ATOM   2451 H5''  DC A  77      -3.156 -16.020  20.700  3.00  0.00           H  
ATOM   2452  P    DC A  78      -5.332 -13.775  24.030  4.00  0.00           P  
ATOM   2453  C5'  DC A  78      -3.523 -12.971  25.800  9.00  0.00           C  
ATOM   2454  O5'  DC A  78      -4.400 -14.023  25.350  5.00  0.00           O  
ATOM   2455  C4'  DC A  78      -2.380 -13.280  26.760  3.00  0.00           C  
ATOM   2456  O4'  DC A  78      -2.806 -13.672  28.030  1.00  0.00           O  
ATOM   2457  C3'  DC A  78      -1.576 -14.473  26.100  1.00  0.00           C  
ATOM   2458  O3'  DC A  78      -0.183 -14.386  26.400  6.00  0.00           O  
ATOM   2459  C2'  DC A  78      -2.233 -15.726  26.720  5.00  0.00           C  
ATOM   2460  C1'  DC A  78      -2.522 -15.141  28.080  3.00  0.00           C  
ATOM   2461  N1   DC A  78      -3.786 -15.748  28.660  9.00  0.00           N  
ATOM   2462  C2   DC A  78      -3.693 -16.837  29.500  5.00  0.00           C  
ATOM   2463  O2   DC A  78      -2.679 -17.313  29.860  5.00  0.00           O  
ATOM   2464  N3   DC A  78      -4.838 -17.431  29.980  6.00  0.00           N  
ATOM   2465  C4   DC A  78      -6.007 -16.903  29.680  4.00  0.00           C  
ATOM   2466  N4   DC A  78      -7.010 -17.585  30.230  5.00  0.00           N  
ATOM   2467  C5   DC A  78      -6.163 -15.701  28.930  7.00  0.00           C  
ATOM   2468  C6   DC A  78      -5.008 -15.179  28.380  1.00  0.00           C  
ATOM   2469  OP1  DC A  78      -6.022 -15.046  23.710  4.00  0.00           O  
ATOM   2470  OP2  DC A  78      -6.157 -12.524  24.190  7.00  0.00           O1-
ATOM   2471  H5   DC A  78      -7.119 -15.300  28.580  6.00  0.00           H  
ATOM   2472  H6   DC A  78      -5.118 -14.369  27.650  9.00  0.00           H  
ATOM   2473  H1'  DC A  78      -1.705 -15.290  28.740  4.00  0.00           H  
ATOM   2474  H2'  DC A  78      -3.140 -16.025  26.250  8.00  0.00           H  
ATOM   2475  H3'  DC A  78      -1.679 -14.482  24.960  1.00  0.00           H  
ATOM   2476  H4'  DC A  78      -1.651 -12.502  26.810  4.00  0.00           H  
ATOM   2477  H41  DC A  78      -6.701 -18.476  30.570  3.00  0.00           H  
ATOM   2478  H5'  DC A  78      -4.048 -12.172  26.230  1.00  0.00           H  
ATOM   2479  H42  DC A  78      -7.997 -17.309  30.080  3.00  0.00           H  
ATOM   2480 H2''  DC A  78      -1.414 -16.471  26.750  6.00  0.00           H  
ATOM   2481 H5''  DC A  78      -3.110 -12.516  24.870  8.00  0.00           H  
ATOM   2482  P    DT A  79       0.933 -14.801  25.340  4.00  0.00           P  
ATOM   2483  C5'  DT A  79       0.681 -12.391  24.330  6.00  0.00           C  
ATOM   2484  O5'  DT A  79       0.877 -13.807  24.130  6.00  0.00           O  
ATOM   2485  C4'  DT A  79       0.824 -11.387  23.150  5.00  0.00           C  
ATOM   2486  O4'  DT A  79       0.871 -10.055  23.670  4.00  0.00           O  
ATOM   2487  C3'  DT A  79       2.177 -11.497  22.410  0.00  0.00           C  
ATOM   2488  O3'  DT A  79       2.034 -11.121  21.090  0.00  0.00           O  
ATOM   2489  C2'  DT A  79       3.041 -10.507  23.120  2.00  0.00           C  
ATOM   2490  C1'  DT A  79       2.062  -9.439  23.320  0.00  0.00           C  
ATOM   2491  N1   DT A  79       2.333  -8.461  24.400  3.00  0.00           N  
ATOM   2492  C2   DT A  79       2.076  -7.158  23.940  6.00  0.00           C  
ATOM   2493  O2   DT A  79       1.750  -6.824  22.860  1.00  0.00           O  
ATOM   2494  N3   DT A  79       1.990  -6.154  24.930  1.00  0.00           N  
ATOM   2495  C4   DT A  79       2.514  -6.410  26.170  1.00  0.00           C  
ATOM   2496  O4   DT A  79       2.600  -5.425  26.910  7.00  0.00           O  
ATOM   2497  C5   DT A  79       2.899  -7.795  26.580  1.00  0.00           C  
ATOM   2498  C6   DT A  79       2.731  -8.751  25.640  8.00  0.00           C  
ATOM   2499  C7   DT A  79       3.446  -8.123  27.910  8.00  0.00           C  
ATOM   2500  OP1  DT A  79       2.277 -14.608  25.900  1.00  0.00           O  
ATOM   2501  OP2  DT A  79       0.618 -16.137  24.820  1.00  0.00           O1-
ATOM   2502  H3   DT A  79       1.765  -5.196  24.680  7.00  0.00           H  
ATOM   2503  H6   DT A  79       2.862  -9.722  25.930  3.00  0.00           H  
ATOM   2504  H1'  DT A  79       1.998  -8.942  22.390  2.00  0.00           H  
ATOM   2505  H2'  DT A  79       3.259 -11.018  24.080  8.00  0.00           H  
ATOM   2506  H3'  DT A  79       2.577 -12.520  22.390  2.00  0.00           H  
ATOM   2507  H4'  DT A  79      -0.119 -11.582  22.540  0.00  0.00           H  
ATOM   2508  H5'  DT A  79       1.451 -12.116  25.150  3.00  0.00           H  
ATOM   2509  H71  DT A  79       3.747  -9.176  28.060  4.00  0.00           H  
ATOM   2510  H72  DT A  79       4.254  -7.537  28.170  7.00  0.00           H  
ATOM   2511  H73  DT A  79       2.656  -7.948  28.660  0.00  0.00           H  
ATOM   2512 H2''  DT A  79       3.887 -10.223  22.580  4.00  0.00           H  
ATOM   2513 H5''  DT A  79      -0.345 -12.312  24.760  0.00  0.00           H  
ATOM   2514  P    DA A  80       3.017 -11.352  19.820  0.00  0.00           P  
ATOM   2515  C5'  DA A  80       3.482  -8.741  19.700  0.00  0.00           C  
ATOM   2516  O5'  DA A  80       3.992 -10.068  19.820  1.00  0.00           O  
ATOM   2517  C4'  DA A  80       4.343  -7.641  20.310  0.00  0.00           C  
ATOM   2518  O4'  DA A  80       4.480  -7.831  21.760  3.00  0.00           O  
ATOM   2519  C3'  DA A  80       5.805  -7.485  19.860  2.00  0.00           C  
ATOM   2520  O3'  DA A  80       6.154  -6.112  19.610  1.00  0.00           O  
ATOM   2521  C2'  DA A  80       6.662  -8.051  21.040  8.00  0.00           C  
ATOM   2522  C1'  DA A  80       5.782  -7.567  22.160  7.00  0.00           C  
ATOM   2523  N1   DA A  80       6.429  -6.646  27.370  4.00  0.00           N  
ATOM   2524  C2   DA A  80       5.900  -5.977  26.320  0.00  0.00           C  
ATOM   2525  N3   DA A  80       5.721  -6.244  24.990  3.00  0.00           N  
ATOM   2526  C4   DA A  80       6.071  -7.525  24.720  9.00  0.00           C  
ATOM   2527  C5   DA A  80       6.708  -8.404  25.610  3.00  0.00           C  
ATOM   2528  C6   DA A  80       6.909  -7.874  26.960  6.00  0.00           C  
ATOM   2529  N6   DA A  80       7.560  -8.556  27.880  1.00  0.00           N  
ATOM   2530  N7   DA A  80       7.080  -9.586  24.930  5.00  0.00           N  
ATOM   2531  C8   DA A  80       6.777  -9.300  23.670  8.00  0.00           C  
ATOM   2532  N9   DA A  80       6.113  -8.184  23.500  0.00  0.00           N  
ATOM   2533  OP1  DA A  80       2.048 -11.287  18.710  9.00  0.00           O  
ATOM   2534  OP2  DA A  80       3.815 -12.581  20.050  8.00  0.00           O1-
ATOM   2535  H2   DA A  80       5.835  -4.874  26.450  1.00  0.00           H  
ATOM   2536  H8   DA A  80       6.783  -9.906  22.850  4.00  0.00           H  
ATOM   2537  H1'  DA A  80       5.914  -6.484  22.210  8.00  0.00           H  
ATOM   2538  H2'  DA A  80       6.735  -9.139  20.920  0.00  0.00           H  
ATOM   2539  H3'  DA A  80       5.797  -8.161  19.010  4.00  0.00           H  
ATOM   2540  H4'  DA A  80       3.698  -6.721  20.170  4.00  0.00           H  
ATOM   2541  H5'  DA A  80       2.545  -8.829  20.240  2.00  0.00           H  
ATOM   2542  H61  DA A  80       7.733  -8.124  28.820  8.00  0.00           H  
ATOM   2543  H62  DA A  80       7.759  -9.581  27.820  7.00  0.00           H  
ATOM   2544 H2''  DA A  80       7.659  -7.721  20.960  2.00  0.00           H  
ATOM   2545 H5''  DA A  80       3.359  -8.623  18.670  4.00  0.00           H  
ATOM   2546  P    DA A  81       7.537  -5.745  19.010  1.00  0.00           P  
ATOM   2547  C5'  DA A  81       7.834  -4.467  21.170  7.00  0.00           C  
ATOM   2548  O5'  DA A  81       8.434  -5.375  20.190  2.00  0.00           O  
ATOM   2549  C4'  DA A  81       8.687  -4.420  22.510  0.00  0.00           C  
ATOM   2550  O4'  DA A  81       8.670  -5.701  23.170  8.00  0.00           O  
ATOM   2551  C3'  DA A  81      10.166  -3.941  22.370  2.00  0.00           C  
ATOM   2552  O3'  DA A  81      10.072  -2.506  22.830  5.00  0.00           O  
ATOM   2553  C2'  DA A  81      10.773  -4.862  23.460  4.00  0.00           C  
ATOM   2554  C1'  DA A  81       9.652  -5.600  24.170  1.00  0.00           C  
ATOM   2555  N1   DA A  81      11.217  -8.285  28.370  1.00  0.00           N  
ATOM   2556  C2   DA A  81      11.000  -6.985  28.130  1.00  0.00           C  
ATOM   2557  N3   DA A  81      10.489  -6.395  27.000  1.00  0.00           N  
ATOM   2558  C4   DA A  81      10.425  -7.257  25.960  1.00  0.00           C  
ATOM   2559  C5   DA A  81      10.743  -8.607  25.980  6.00  0.00           C  
ATOM   2560  C6   DA A  81      11.035  -9.106  27.310  2.00  0.00           C  
ATOM   2561  N6   DA A  81      11.394 -10.318  27.580  0.00  0.00           N  
ATOM   2562  N7   DA A  81      10.701  -9.199  24.680  4.00  0.00           N  
ATOM   2563  C8   DA A  81      10.232  -8.189  23.960  4.00  0.00           C  
ATOM   2564  N9   DA A  81      10.057  -6.997  24.680  1.00  0.00           N  
ATOM   2565  OP1  DA A  81       7.300  -4.539  18.140  1.00  0.00           O  
ATOM   2566  OP2  DA A  81       8.210  -6.890  18.320  3.00  0.00           O1-
ATOM   2567  H2   DA A  81      11.123  -6.367  29.010  7.00  0.00           H  
ATOM   2568  H8   DA A  81       9.866  -8.404  22.940  8.00  0.00           H  
ATOM   2569  H1'  DA A  81       9.349  -5.055  25.060  7.00  0.00           H  
ATOM   2570  H2'  DA A  81      11.402  -5.594  22.910  3.00  0.00           H  
ATOM   2571  H3'  DA A  81      10.637  -4.071  21.440  5.00  0.00           H  
ATOM   2572  H4'  DA A  81       8.197  -3.698  23.120  1.00  0.00           H  
ATOM   2573  H5'  DA A  81       6.835  -4.732  21.460  7.00  0.00           H  
ATOM   2574  H61  DA A  81      11.832 -10.516  28.410  3.00  0.00           H  
ATOM   2575  H62  DA A  81      11.297 -11.071  26.920  0.00  0.00           H  
ATOM   2576 H2''  DA A  81      11.326  -4.314  24.220  9.00  0.00           H  
ATOM   2577 H5''  DA A  81       7.769  -3.463  20.690  0.00  0.00           H  
ATOM   2578  P    DC A  82      11.224  -1.263  22.690  1.00  0.00           P  
ATOM   2579  C5'  DC A  82      12.454  -0.827  24.980  4.00  0.00           C  
ATOM   2580  O5'  DC A  82      12.408  -1.508  23.720  5.00  0.00           O  
ATOM   2581  C4'  DC A  82      13.582  -1.312  25.950  1.00  0.00           C  
ATOM   2582  O4'  DC A  82      13.434  -2.755  26.190  9.00  0.00           O  
ATOM   2583  C3'  DC A  82      14.932  -1.053  25.330  7.00  0.00           C  
ATOM   2584  O3'  DC A  82      15.821  -0.689  26.420  1.00  0.00           O  
ATOM   2585  C2'  DC A  82      15.265  -2.493  24.870  4.00  0.00           C  
ATOM   2586  C1'  DC A  82      14.674  -3.348  25.920  9.00  0.00           C  
ATOM   2587  N1   DC A  82      14.343  -4.787  25.600  1.00  0.00           N  
ATOM   2588  C2   DC A  82      14.554  -5.783  26.620  5.00  0.00           C  
ATOM   2589  O2   DC A  82      14.969  -5.551  27.740  3.00  0.00           O  
ATOM   2590  N3   DC A  82      14.291  -7.058  26.300  9.00  0.00           N  
ATOM   2591  C4   DC A  82      13.888  -7.411  25.100  3.00  0.00           C  
ATOM   2592  N4   DC A  82      13.759  -8.709  24.820  6.00  0.00           N  
ATOM   2593  C5   DC A  82      13.723  -6.479  24.060  0.00  0.00           C  
ATOM   2594  C6   DC A  82      13.876  -5.144  24.390  4.00  0.00           C  
ATOM   2595  OP1  DC A  82      10.493   0.003  23.090  2.00  0.00           O  
ATOM   2596  OP2  DC A  82      11.780  -1.406  21.310  1.00  0.00           O1-
ATOM   2597  H5   DC A  82      13.426  -6.755  23.040  2.00  0.00           H  
ATOM   2598  H6   DC A  82      13.630  -4.329  23.660  6.00  0.00           H  
ATOM   2599  H1'  DC A  82      15.337  -3.306  26.850  4.00  0.00           H  
ATOM   2600  H2'  DC A  82      14.852  -2.721  23.900  4.00  0.00           H  
ATOM   2601  H3'  DC A  82      14.981  -0.287  24.550  1.00  0.00           H  
ATOM   2602  H4'  DC A  82      13.476  -0.739  26.860  3.00  0.00           H  
ATOM   2603  H41  DC A  82      14.039  -9.442  25.490  5.00  0.00           H  
ATOM   2604  H5'  DC A  82      11.509  -0.963  25.440  5.00  0.00           H  
ATOM   2605  H42  DC A  82      13.395  -8.952  23.910  6.00  0.00           H  
ATOM   2606 H2''  DC A  82      16.331  -2.705  24.970  2.00  0.00           H  
ATOM   2607 H5''  DC A  82      12.553   0.263  24.780  7.00  0.00           H  
ATOM   2608  P    DC A  83      17.437  -0.522  26.190  8.00  0.00           P  
ATOM   2609  C5'  DC A  83      18.566  -2.015  27.890  0.00  0.00           C  
ATOM   2610  O5'  DC A  83      18.293  -1.834  26.550  3.00  0.00           O  
ATOM   2611  C4'  DC A  83      19.563  -3.195  28.160  3.00  0.00           C  
ATOM   2612  O4'  DC A  83      18.859  -4.389  27.710  9.00  0.00           O  
ATOM   2613  C3'  DC A  83      20.867  -3.060  27.290  6.00  0.00           C  
ATOM   2614  O3'  DC A  83      21.977  -3.112  28.120  4.00  0.00           O  
ATOM   2615  C2'  DC A  83      20.641  -4.284  26.460  3.00  0.00           C  
ATOM   2616  C1'  DC A  83      19.779  -5.277  27.260  3.00  0.00           C  
ATOM   2617  N1   DC A  83      19.022  -6.363  26.410  9.00  0.00           N  
ATOM   2618  C2   DC A  83      19.369  -7.671  26.730  2.00  0.00           C  
ATOM   2619  O2   DC A  83      20.211  -7.868  27.610  2.00  0.00           O  
ATOM   2620  N3   DC A  83      18.779  -8.752  26.150  6.00  0.00           N  
ATOM   2621  C4   DC A  83      17.913  -8.494  25.150  9.00  0.00           C  
ATOM   2622  N4   DC A  83      17.533  -9.510  24.450  1.00  0.00           N  
ATOM   2623  C5   DC A  83      17.696  -7.199  24.670  4.00  0.00           C  
ATOM   2624  C6   DC A  83      18.261  -6.145  25.300  5.00  0.00           C  
ATOM   2625  OP1  DC A  83      17.977   0.588  27.000  4.00  0.00           O  
ATOM   2626  OP2  DC A  83      17.668  -0.311  24.760  7.00  0.00           O1-
ATOM   2627  H5   DC A  83      17.198  -7.058  23.820  0.00  0.00           H  
ATOM   2628  H6   DC A  83      18.123  -5.161  24.910  6.00  0.00           H  
ATOM   2629  H1'  DC A  83      20.323  -5.659  28.150  5.00  0.00           H  
ATOM   2630  H2'  DC A  83      20.122  -4.064  25.550  3.00  0.00           H  
ATOM   2631  H3'  DC A  83      20.845  -2.256  26.590  8.00  0.00           H  
ATOM   2632  H4'  DC A  83      19.617  -3.180  29.250  9.00  0.00           H  
ATOM   2633  H41  DC A  83      17.617 -10.400  24.830  0.00  0.00           H  
ATOM   2634  H5'  DC A  83      17.639  -2.253  28.350  4.00  0.00           H  
ATOM   2635  H42  DC A  83      16.915  -9.406  23.650  2.00  0.00           H  
ATOM   2636 H2''  DC A  83      21.648  -4.643  26.210  1.00  0.00           H  
ATOM   2637 H5''  DC A  83      18.786  -1.142  28.470  2.00  0.00           H  
ATOM   2638  P    DC A  84      23.535  -2.900  27.710  3.00  0.00           P  
ATOM   2639  C5'  DC A  84      24.355  -5.435  27.820  4.00  0.00           C  
ATOM   2640  O5'  DC A  84      23.947  -4.257  27.010  1.00  0.00           O  
ATOM   2641  C4'  DC A  84      24.692  -6.614  26.990  8.00  0.00           C  
ATOM   2642  O4'  DC A  84      23.470  -7.267  26.530  9.00  0.00           O  
ATOM   2643  C3'  DC A  84      25.600  -6.362  25.790  0.00  0.00           C  
ATOM   2644  O3'  DC A  84      26.487  -7.449  25.540  0.00  0.00           O  
ATOM   2645  C2'  DC A  84      24.629  -6.398  24.600  7.00  0.00           C  
ATOM   2646  C1'  DC A  84      23.840  -7.609  25.220  1.00  0.00           C  
ATOM   2647  N1   DC A  84      22.648  -7.932  24.420  7.00  0.00           N  
ATOM   2648  C2   DC A  84      22.297  -9.276  24.390  5.00  0.00           C  
ATOM   2649  O2   DC A  84      22.809 -10.048  25.190  4.00  0.00           O  
ATOM   2650  N3   DC A  84      21.399  -9.732  23.590  0.00  0.00           N  
ATOM   2651  C4   DC A  84      20.878  -8.843  22.750  2.00  0.00           C  
ATOM   2652  N4   DC A  84      19.854  -9.296  22.010  9.00  0.00           N  
ATOM   2653  C5   DC A  84      21.139  -7.444  22.750  3.00  0.00           C  
ATOM   2654  C6   DC A  84      22.034  -6.997  23.610  3.00  0.00           C  
ATOM   2655  OP1  DC A  84      24.329  -2.803  28.970  0.00  0.00           O  
ATOM   2656  OP2  DC A  84      23.590  -1.814  26.740  3.00  0.00           O1-
ATOM   2657  H5   DC A  84      20.668  -6.818  22.030  8.00  0.00           H  
ATOM   2658  H6   DC A  84      22.290  -5.908  23.570  1.00  0.00           H  
ATOM   2659  H1'  DC A  84      24.445  -8.482  25.230  5.00  0.00           H  
ATOM   2660  H2'  DC A  84      24.044  -5.509  24.640  6.00  0.00           H  
ATOM   2661  H3'  DC A  84      26.184  -5.473  25.900  3.00  0.00           H  
ATOM   2662  H4'  DC A  84      25.185  -7.306  27.660  4.00  0.00           H  
ATOM   2663  H41  DC A  84      19.648 -10.316  22.090  5.00  0.00           H  
ATOM   2664  H5'  DC A  84      23.665  -5.866  28.500  6.00  0.00           H  
ATOM   2665  H42  DC A  84      19.345  -8.582  21.480  4.00  0.00           H  
ATOM   2666 H2''  DC A  84      25.192  -6.565  23.680  0.00  0.00           H  
ATOM   2667 H5''  DC A  84      25.265  -5.091  28.300  3.00  0.00           H  
ATOM   2668  P    DT A  85      28.058  -7.354  25.990  1.00  0.00           P  
ATOM   2669  C5'  DT A  85      28.247  -9.665  27.350  2.00  0.00           C  
ATOM   2670  O5'  DT A  85      28.514  -8.920  26.150  5.00  0.00           O  
ATOM   2671  C4'  DT A  85      28.246 -11.196  27.290  4.00  0.00           C  
ATOM   2672  O4'  DT A  85      27.162 -11.608  26.390  1.00  0.00           O  
ATOM   2673  C3'  DT A  85      29.464 -11.765  26.580  2.00  0.00           C  
ATOM   2674  O3'  DT A  85      29.746 -13.019  27.180  0.00  0.00           O  
ATOM   2675  C2'  DT A  85      29.149 -11.878  25.130  7.00  0.00           C  
ATOM   2676  C1'  DT A  85      27.666 -12.246  25.260  8.00  0.00           C  
ATOM   2677  N1   DT A  85      26.718 -11.809  24.200  7.00  0.00           N  
ATOM   2678  C2   DT A  85      25.628 -12.680  23.860  9.00  0.00           C  
ATOM   2679  O2   DT A  85      25.635 -13.867  24.230  0.00  0.00           O  
ATOM   2680  N3   DT A  85      24.605 -12.144  23.060  8.00  0.00           N  
ATOM   2681  C4   DT A  85      24.713 -11.007  22.340  2.00  0.00           C  
ATOM   2682  O4   DT A  85      23.826 -10.651  21.600  7.00  0.00           O  
ATOM   2683  C5   DT A  85      25.888 -10.226  22.610  4.00  0.00           C  
ATOM   2684  C6   DT A  85      26.761 -10.627  23.540  4.00  0.00           C  
ATOM   2685  C7   DT A  85      26.035  -8.799  22.030  4.00  0.00           C  
ATOM   2686  OP1  DT A  85      28.188  -6.677  27.270  1.00  0.00           O  
ATOM   2687  OP2  DT A  85      28.796  -6.909  24.800  8.00  0.00           O1-
ATOM   2688  H3   DT A  85      23.901 -12.861  22.760  7.00  0.00           H  
ATOM   2689  H6   DT A  85      27.493  -9.878  23.860  4.00  0.00           H  
ATOM   2690  H1'  DT A  85      27.599 -13.259  25.550  3.00  0.00           H  
ATOM   2691  H2'  DT A  85      29.147 -10.830  24.740  5.00  0.00           H  
ATOM   2692  H3'  DT A  85      30.322 -11.128  26.790  0.00  0.00           H  
ATOM   2693  H4'  DT A  85      28.184 -11.650  28.290  1.00  0.00           H  
ATOM   2694  H5'  DT A  85      27.275  -9.355  27.710  9.00  0.00           H  
ATOM   2695  H71  DT A  85      26.006  -8.767  20.930  9.00  0.00           H  
ATOM   2696  H72  DT A  85      25.127  -8.253  22.290  2.00  0.00           H  
ATOM   2697  H73  DT A  85      26.820  -8.202  22.420  5.00  0.00           H  
ATOM   2698 H2''  DT A  85      29.757 -12.580  24.630  5.00  0.00           H  
ATOM   2699 H5''  DT A  85      28.941  -9.374  28.090  8.00  0.00           H  
ATOM   2700  P    DA A  86      31.107 -13.844  27.030  1.00  0.00           P  
ATOM   2701  C5'  DA A  86      30.116 -15.881  25.920  6.00  0.00           C  
ATOM   2702  O5'  DA A  86      30.870 -14.753  25.740  7.00  0.00           O  
ATOM   2703  C4'  DA A  86      29.642 -16.396  24.600  0.00  0.00           C  
ATOM   2704  O4'  DA A  86      28.889 -15.467  23.840  1.00  0.00           O  
ATOM   2705  C3'  DA A  86      30.813 -16.906  23.690  9.00  0.00           C  
ATOM   2706  O3'  DA A  86      30.441 -18.069  22.950  8.00  0.00           O  
ATOM   2707  C2'  DA A  86      31.008 -15.672  22.850  6.00  0.00           C  
ATOM   2708  C1'  DA A  86      29.487 -15.453  22.620  6.00  0.00           C  
ATOM   2709  N1   DA A  86      26.183 -12.734  19.910  7.00  0.00           N  
ATOM   2710  C2   DA A  86      26.094 -13.936  20.410  0.00  0.00           C  
ATOM   2711  N3   DA A  86      27.076 -14.556  21.070  2.00  0.00           N  
ATOM   2712  C4   DA A  86      28.088 -13.719  21.420  4.00  0.00           C  
ATOM   2713  C5   DA A  86      28.291 -12.473  20.980  4.00  0.00           C  
ATOM   2714  C6   DA A  86      27.259 -11.994  20.150  0.00  0.00           C  
ATOM   2715  N6   DA A  86      27.311 -10.840  19.480  1.00  0.00           N  
ATOM   2716  N7   DA A  86      29.519 -11.952  21.490  7.00  0.00           N  
ATOM   2717  C8   DA A  86      29.972 -12.993  22.160  5.00  0.00           C  
ATOM   2718  N9   DA A  86      29.199 -14.121  22.050  4.00  0.00           N  
ATOM   2719  OP1  DA A  86      31.320 -14.600  28.300  0.00  0.00           O  
ATOM   2720  OP2  DA A  86      32.202 -12.912  26.630  6.00  0.00           O1-
ATOM   2721  H2   DA A  86      25.178 -14.514  20.160  0.00  0.00           H  
ATOM   2722  H8   DA A  86      30.866 -13.048  22.670  7.00  0.00           H  
ATOM   2723  H1'  DA A  86      29.002 -16.297  22.000  9.00  0.00           H  
ATOM   2724  H2'  DA A  86      31.537 -14.824  23.350  9.00  0.00           H  
ATOM   2725  H3'  DA A  86      31.764 -17.005  24.220  9.00  0.00           H  
ATOM   2726  H4'  DA A  86      29.057 -17.267  24.880  0.00  0.00           H  
ATOM   2727  H5'  DA A  86      29.221 -15.500  26.450  7.00  0.00           H  
ATOM   2728  H61  DA A  86      26.530 -10.648  18.890  3.00  0.00           H  
ATOM   2729  H62  DA A  86      28.051 -10.176  19.550  6.00  0.00           H  
ATOM   2730 H2''  DA A  86      31.480 -15.918  21.870  8.00  0.00           H  
ATOM   2731 H5''  DA A  86      30.625 -16.587  26.530  4.00  0.00           H  
ATOM   2732  P    DA A  87      31.468 -19.242  22.760  1.00  0.00           P  
ATOM   2733  C5'  DA A  87      29.440 -20.702  22.030  9.00  0.00           C  
ATOM   2734  O5'  DA A  87      30.709 -20.078  21.620  3.00  0.00           O  
ATOM   2735  C4'  DA A  87      28.700 -21.006  20.790  6.00  0.00           C  
ATOM   2736  O4'  DA A  87      28.169 -19.784  20.250  9.00  0.00           O  
ATOM   2737  C3'  DA A  87      29.351 -21.725  19.630  1.00  0.00           C  
ATOM   2738  O3'  DA A  87      28.413 -22.544  18.930  1.00  0.00           O  
ATOM   2739  C2'  DA A  87      29.854 -20.613  18.700  8.00  0.00           C  
ATOM   2740  C1'  DA A  87      28.840 -19.528  18.970  7.00  0.00           C  
ATOM   2741  N1   DA A  87      27.656 -14.816  17.480  4.00  0.00           N  
ATOM   2742  C2   DA A  87      27.108 -16.010  17.330  5.00  0.00           C  
ATOM   2743  N3   DA A  87      27.488 -17.203  17.810  3.00  0.00           N  
ATOM   2744  C4   DA A  87      28.691 -17.065  18.430  8.00  0.00           C  
ATOM   2745  C5   DA A  87      29.400 -15.920  18.680  4.00  0.00           C  
ATOM   2746  C6   DA A  87      28.775 -14.740  18.220  2.00  0.00           C  
ATOM   2747  N6   DA A  87      29.326 -13.507  18.190  1.00  0.00           N  
ATOM   2748  N7   DA A  87      30.558 -16.296  19.430  4.00  0.00           N  
ATOM   2749  C8   DA A  87      30.495 -17.625  19.440  9.00  0.00           C  
ATOM   2750  N9   DA A  87      29.357 -18.131  19.000  8.00  0.00           N  
ATOM   2751  OP1  DA A  87      31.498 -20.049  24.010  3.00  0.00           O  
ATOM   2752  OP2  DA A  87      32.795 -18.714  22.300  1.00  0.00           O1-
ATOM   2753  H2   DA A  87      26.155 -16.085  16.800  2.00  0.00           H  
ATOM   2754  H8   DA A  87      31.212 -18.297  19.880  3.00  0.00           H  
ATOM   2755  H1'  DA A  87      28.067 -19.673  18.160  6.00  0.00           H  
ATOM   2756  H2'  DA A  87      30.915 -20.367  18.820  6.00  0.00           H  
ATOM   2757  H3'  DA A  87      30.215 -22.342  19.900  5.00  0.00           H  
ATOM   2758  H4'  DA A  87      27.854 -21.589  21.080  7.00  0.00           H  
ATOM   2759  H5'  DA A  87      28.672 -20.021  22.480  7.00  0.00           H  
ATOM   2760  H61  DA A  87      28.789 -12.844  17.720  5.00  0.00           H  
ATOM   2761  H62  DA A  87      30.212 -13.243  18.570  7.00  0.00           H  
ATOM   2762 H2''  DA A  87      29.721 -20.883  17.640  0.00  0.00           H  
ATOM   2763 H5''  DA A  87      29.627 -21.635  22.610  2.00  0.00           H  
ATOM   2764  P    DC A  88      28.940 -23.635  17.880  4.00  0.00           P  
ATOM   2765  C5'  DC A  88      28.873 -22.941  15.330  5.00  0.00           C  
ATOM   2766  O5'  DC A  88      28.186 -23.078  16.570  5.00  0.00           O  
ATOM   2767  C4'  DC A  88      27.912 -22.320  14.280  2.00  0.00           C  
ATOM   2768  O4'  DC A  88      27.568 -20.966  14.740  3.00  0.00           O  
ATOM   2769  C3'  DC A  88      28.544 -22.127  12.920  7.00  0.00           C  
ATOM   2770  O3'  DC A  88      27.592 -22.087  11.850  7.00  0.00           O  
ATOM   2771  C2'  DC A  88      29.294 -20.796  13.090  2.00  0.00           C  
ATOM   2772  C1'  DC A  88      28.166 -19.989  13.800  0.00  0.00           C  
ATOM   2773  N1   DC A  88      28.718 -18.823  14.590  3.00  0.00           N  
ATOM   2774  C2   DC A  88      28.497 -17.519  14.100  8.00  0.00           C  
ATOM   2775  O2   DC A  88      27.638 -17.302  13.250  8.00  0.00           O  
ATOM   2776  N3   DC A  88      29.272 -16.449  14.430  7.00  0.00           N  
ATOM   2777  C4   DC A  88      30.200 -16.581  15.360  6.00  0.00           C  
ATOM   2778  N4   DC A  88      30.832 -15.548  15.730  2.00  0.00           N  
ATOM   2779  C5   DC A  88      30.534 -17.915  15.830  7.00  0.00           C  
ATOM   2780  C6   DC A  88      29.781 -18.961  15.480  9.00  0.00           C  
ATOM   2781  OP1  DC A  88      28.308 -24.908  18.280  2.00  0.00           O  
ATOM   2782  OP2  DC A  88      30.387 -23.583  17.820  1.00  0.00           O1-
ATOM   2783  H5   DC A  88      31.355 -18.021  16.560  5.00  0.00           H  
ATOM   2784  H6   DC A  88      29.858 -19.926  15.930  3.00  0.00           H  
ATOM   2785  H1'  DC A  88      27.420 -19.652  13.070  8.00  0.00           H  
ATOM   2786  H2'  DC A  88      30.125 -20.851  13.830  4.00  0.00           H  
ATOM   2787  H3'  DC A  88      29.160 -22.996  12.640  0.00  0.00           H  
ATOM   2788  H4'  DC A  88      27.007 -22.897  14.180  6.00  0.00           H  
ATOM   2789  H41  DC A  88      30.490 -14.606  15.600  4.00  0.00           H  
ATOM   2790  H5'  DC A  88      29.294 -23.917  14.940  5.00  0.00           H  
ATOM   2791  H42  DC A  88      31.560 -15.634  16.440  3.00  0.00           H  
ATOM   2792 H2''  DC A  88      29.672 -20.327  12.190  2.00  0.00           H  
ATOM   2793 H5''  DC A  88      29.678 -22.244  15.560  5.00  0.00           H  
ATOM   2794  P    DC A  89      28.054 -22.062  10.300  4.00  0.00           P  
ATOM   2795  C5'  DC A  89      26.869 -19.781   9.790  9.00  0.00           C  
ATOM   2796  O5'  DC A  89      28.108 -20.494  10.010  7.00  0.00           O  
ATOM   2797  C4'  DC A  89      26.877 -18.565   8.950  4.00  0.00           C  
ATOM   2798  O4'  DC A  89      27.517 -17.458   9.570  3.00  0.00           O  
ATOM   2799  C3'  DC A  89      27.586 -18.909   7.610  0.00  0.00           C  
ATOM   2800  O3'  DC A  89      26.761 -18.346   6.660  6.00  0.00           O  
ATOM   2801  C2'  DC A  89      28.998 -18.365   7.910  9.00  0.00           C  
ATOM   2802  C1'  DC A  89      28.636 -17.166   8.770  4.00  0.00           C  
ATOM   2803  N1   DC A  89      29.688 -16.849   9.720  5.00  0.00           N  
ATOM   2804  C2   DC A  89      30.155 -15.540   9.840  4.00  0.00           C  
ATOM   2805  O2   DC A  89      29.858 -14.680   9.060  7.00  0.00           O  
ATOM   2806  N3   DC A  89      31.013 -15.137  10.810  4.00  0.00           N  
ATOM   2807  C4   DC A  89      31.381 -16.015  11.670  5.00  0.00           C  
ATOM   2808  N4   DC A  89      32.146 -15.501  12.560  9.00  0.00           N  
ATOM   2809  C5   DC A  89      31.121 -17.375  11.580  7.00  0.00           C  
ATOM   2810  C6   DC A  89      30.223 -17.854  10.590  9.00  0.00           C  
ATOM   2811  OP1  DC A  89      27.049 -22.790   9.480  8.00  0.00           O  
ATOM   2812  OP2  DC A  89      29.451 -22.603  10.310  0.00  0.00           O1-
ATOM   2813  H5   DC A  89      31.497 -18.063  12.290  6.00  0.00           H  
ATOM   2814  H6   DC A  89      29.905 -18.881  10.560  6.00  0.00           H  
ATOM   2815  H1'  DC A  89      28.319 -16.377   8.090  1.00  0.00           H  
ATOM   2816  H2'  DC A  89      29.699 -19.134   8.390  2.00  0.00           H  
ATOM   2817  H3'  DC A  89      27.595 -20.015   7.430  8.00  0.00           H  
ATOM   2818  H4'  DC A  89      25.879 -18.309   8.710  5.00  0.00           H  
ATOM   2819  H41  DC A  89      32.245 -14.544  12.680  4.00  0.00           H  
ATOM   2820  H5'  DC A  89      26.508 -19.517  10.820  3.00  0.00           H  
ATOM   2821  H42  DC A  89      32.467 -16.125  13.300  5.00  0.00           H  
ATOM   2822 H2''  DC A  89      29.498 -18.088   6.930  8.00  0.00           H  
ATOM   2823 H5''  DC A  89      26.195 -20.482   9.350  1.00  0.00           H  
ATOM   2824  P   DC3 A  90      27.125 -18.027   5.180  6.00  0.00           P  
ATOM   2825  C5' DC3 A  90      27.580 -15.432   5.270  4.00  0.00           C  
ATOM   2826  O5' DC3 A  90      28.084 -16.747   5.190  9.00  0.00           O  
ATOM   2827  C4' DC3 A  90      28.617 -14.292   4.920  2.00  0.00           C  
ATOM   2828  O4' DC3 A  90      29.549 -14.144   5.980  9.00  0.00           O  
ATOM   2829  C3' DC3 A  90      29.411 -14.661   3.620  9.00  0.00           C  
ATOM   2830  O3' DC3 A  90      29.469 -13.503   2.740  5.00  0.00           O  
ATOM   2831  C2' DC3 A  90      30.756 -14.833   4.190  9.00  0.00           C  
ATOM   2832  C1' DC3 A  90      30.801 -13.886   5.370  7.00  0.00           C  
ATOM   2833  N1  DC3 A  90      31.877 -14.211   6.360  7.00  0.00           N  
ATOM   2834  C2  DC3 A  90      32.933 -13.269   6.630  5.00  0.00           C  
ATOM   2835  O2  DC3 A  90      33.007 -12.246   6.010  0.00  0.00           O  
ATOM   2836  N3  DC3 A  90      33.836 -13.504   7.620  8.00  0.00           N  
ATOM   2837  C4  DC3 A  90      33.808 -14.702   8.200  5.00  0.00           C  
ATOM   2838  N4  DC3 A  90      34.606 -14.851   9.150  9.00  0.00           N  
ATOM   2839  C5  DC3 A  90      32.811 -15.641   7.960  7.00  0.00           C  
ATOM   2840  C6  DC3 A  90      31.866 -15.450   7.020  4.00  0.00           C  
ATOM   2841  OP1 DC3 A  90      25.906 -17.801   4.360  0.00  0.00           O  
ATOM   2842  OP2 DC3 A  90      27.937 -19.180   4.730  6.00  0.00           O  
ATOM   2843 HO3' DC3 A  90      30.385 -13.347   2.470  1.00  0.00           H  
ATOM   2844  H5  DC3 A  90      32.680 -16.519   8.610  7.00  0.00           H  
ATOM   2845  H6  DC3 A  90      31.001 -16.070   6.790  6.00  0.00           H  
ATOM   2846  H1' DC3 A  90      30.821 -12.877   4.890  3.00  0.00           H  
ATOM   2847  H2' DC3 A  90      30.818 -15.839   4.500  3.00  0.00           H  
ATOM   2848  H3' DC3 A  90      28.983 -15.511   3.040  6.00  0.00           H  
ATOM   2849  H4' DC3 A  90      28.145 -13.337   4.790  8.00  0.00           H  
ATOM   2850  H41 DC3 A  90      35.455 -14.211   9.290  5.00  0.00           H  
ATOM   2851  H5' DC3 A  90      27.259 -15.331   6.290  0.00  0.00           H  
ATOM   2852  H42 DC3 A  90      34.479 -15.616   9.830  1.00  0.00           H  
ATOM   2853 H2'' DC3 A  90      31.523 -14.508   3.530  6.00  0.00           H  
ATOM   2854 H5'' DC3 A  90      26.710 -15.317   4.670  1.00  0.00           H  
ATOM   2855  C   CNT A 208      15.563  15.191   5.840  3.00  0.00           C  
ATOM   2856  C   CNT A 208      14.670  14.157   6.030  7.00  0.00           C  
ATOM   2857  C   CNT A 208      14.388  14.057   7.410  8.00  0.00           C  
ATOM   2858  C   CNT A 208      13.857  12.869   7.940  5.00  0.00           C  
ATOM   2859  C   CNT A 208      14.240  13.075   5.280  7.00  0.00           C  
ATOM   2860  C   CNT A 208      14.254  11.725   5.850  4.00  0.00           C  
ATOM   2861  C   CNT A 208      13.851  11.678   7.230  7.00  0.00           C  
ATOM   2862  C   CNT A 208      13.616  10.450   7.830  4.00  0.00           C  
ATOM   2863  C   CNT A 208      14.550  10.430   5.390  7.00  0.00           C  
ATOM   2864  C   CNT A 208      14.607   9.165   6.010  0.00  0.00           C  
ATOM   2865  C   CNT A 208      14.128   9.168   7.350  6.00  0.00           C  
ATOM   2866  C   CNT A 208      14.225   8.057   8.150  4.00  0.00           C  
ATOM   2867  C   CNT A 208      15.042   7.854   5.630  4.00  0.00           C  
ATOM   2868  C   CNT A 208      15.452   6.874   6.480  3.00  0.00           C  
ATOM   2869  C   CNT A 208      15.019   6.948   7.790  0.00  0.00           C  
ATOM   2870  C   CNT A 208      15.539   6.099   8.770  6.00  0.00           C  
ATOM   2871  C   CNT A 208      16.171   5.757   6.150  7.00  0.00           C  
ATOM   2872  C   CNT A 208      17.048   5.126   7.040  0.00  0.00           C  
ATOM   2873  C   CNT A 208      16.604   5.269   8.450  6.00  0.00           C  
ATOM   2874  C   CNT A 208      17.117   4.368   9.400  0.00  0.00           C  
ATOM   2875  C   CNT A 208      18.276   4.388   6.860  3.00  0.00           C  
ATOM   2876  C   CNT A 208      18.934   3.719   7.920  6.00  0.00           C  
ATOM   2877  C   CNT A 208      18.346   3.715   9.210  1.00  0.00           C  
ATOM   2878  C   CNT A 208      19.018   3.180  10.280  5.00  0.00           C  
ATOM   2879  C   CNT A 208      20.160   3.044   7.820  4.00  0.00           C  
ATOM   2880  C   CNT A 208      20.935   2.517   8.880  1.00  0.00           C  
ATOM   2881  C   CNT A 208      20.356   2.705  10.130  3.00  0.00           C  
ATOM   2882  C   CNT A 208      21.213   2.553  11.250  9.00  0.00           C  
ATOM   2883  C   CNT A 208      22.355   2.127   8.770  6.00  0.00           C  
ATOM   2884  C   CNT A 208      23.273   2.497   9.780  9.00  0.00           C  
ATOM   2885  C   CNT A 208      22.640   2.726  11.070  4.00  0.00           C  
ATOM   2886  C   CNT A 208      23.427   3.122  12.200  4.00  0.00           C  
ATOM   2887  C   CNT A 208      24.667   2.668   9.870  6.00  0.00           C  
ATOM   2888  C   CNT A 208      25.342   3.570  10.750  6.00  0.00           C  
ATOM   2889  C   CNT A 208      24.699   3.714  12.010  6.00  0.00           C  
ATOM   2890  C   CNT A 208      25.226   4.524  12.980  2.00  0.00           C  
ATOM   2891  C   CNT A 208      26.568   4.201  10.570  0.00  0.00           C  
ATOM   2892  C   CNT A 208      26.873   5.285  11.360  5.00  0.00           C  
ATOM   2893  C   CNT A 208      26.292   5.410  12.610  3.00  0.00           C  
ATOM   2894  C   CNT A 208      26.688   6.441  13.460  5.00  0.00           C  
ATOM   2895  C   CNT A 208      27.879   6.197  11.050  0.00  0.00           C  
ATOM   2896  C   CNT A 208      28.132   7.388  11.780  7.00  0.00           C  
ATOM   2897  C   CNT A 208      27.537   7.485  13.070  2.00  0.00           C  
ATOM   2898  C   CNT A 208      27.534   8.653  13.770  9.00  0.00           C  
ATOM   2899  C   CNT A 208      28.824   8.574  11.370  2.00  0.00           C  
ATOM   2900  C   CNT A 208      28.768   9.817  12.070  4.00  0.00           C  
ATOM   2901  C   CNT A 208      28.101   9.819  13.300  4.00  0.00           C  
ATOM   2902  C   CNT A 208      28.138  11.015  14.020  5.00  0.00           C  
ATOM   2903  C   CNT A 208      28.923  11.036  11.410  3.00  0.00           C  
ATOM   2904  C   CNT A 208      28.962  12.272  12.120  3.00  0.00           C  
ATOM   2905  C   CNT A 208      28.364  12.277  13.370  5.00  0.00           C  
ATOM   2906  C   CNT A 208      27.764  13.427  13.820  9.00  0.00           C  
ATOM   2907  C   CNT A 208      29.265  13.525  11.510  4.00  0.00           C  
ATOM   2908  C   CNT A 208      28.231  14.504  11.700  0.00  0.00           C  
ATOM   2909  C   CNT A 208      27.606  14.446  12.940  0.00  0.00           C  
ATOM   2910  C   CNT A 208      26.636  15.423  13.290  2.00  0.00           C  
ATOM   2911  C   CNT A 208      27.604  15.370  10.710  9.00  0.00           C  
ATOM   2912  C   CNT A 208      26.583  16.287  10.980  1.00  0.00           C  
ATOM   2913  C   CNT A 208      26.011  16.180  12.320  0.00  0.00           C  
ATOM   2914  C   CNT A 208      24.854  16.919  12.590  9.00  0.00           C  
ATOM   2915  C   CNT A 208      26.067  17.349  10.240  0.00  0.00           C  
ATOM   2916  C   CNT A 208      24.744  17.741  10.250  2.00  0.00           C  
ATOM   2917  C   CNT A 208      24.164  17.503  11.470  7.00  0.00           C  
ATOM   2918  C   CNT A 208      22.801  17.709  11.620  0.00  0.00           C  
ATOM   2919  C   CNT A 208      23.904  18.294   9.250  3.00  0.00           C  
ATOM   2920  C   CNT A 208      22.508  17.883   9.230  2.00  0.00           C  
ATOM   2921  C   CNT A 208      21.944  17.681  10.520  9.00  0.00           C  
ATOM   2922  C   CNT A 208      20.575  17.760  10.730  6.00  0.00           C  
ATOM   2923  C   CNT A 208      21.636  17.751   8.080  4.00  0.00           C  
ATOM   2924  C   CNT A 208      20.225  17.968   8.290  7.00  0.00           C  
ATOM   2925  C   CNT A 208      19.764  17.682   9.560  3.00  0.00           C  
ATOM   2926  C   CNT A 208      18.405  17.577   9.810  9.00  0.00           C  
ATOM   2927  C   CNT A 208      19.252  18.088   7.250  4.00  0.00           C  
ATOM   2928  C   CNT A 208      17.909  17.647   7.400  4.00  0.00           C  
ATOM   2929  C   CNT A 208      17.530  17.389   8.730  0.00  0.00           C  
ATOM   2930  C   CNT A 208      16.262  16.826   8.950  6.00  0.00           C  
ATOM   2931  C   CNT A 208      16.947  17.279   6.450  3.00  0.00           C  
ATOM   2932  C   CNT A 208      15.981  16.250   6.670  6.00  0.00           C  
ATOM   2933  C   CNT A 208      15.516  16.191   7.970  0.00  0.00           C  
ATOM   2934  C   CNT A 208      14.615  15.102   8.280  0.00  0.00           C  
ATOM   2935  C   CNT A 208      14.191  15.010   9.570  3.00  0.00           C  
ATOM   2936  C   CNT A 208      13.391  13.986  10.000  3.00  0.00           C  
ATOM   2937  C   CNT A 208      12.848  14.045  11.320  5.00  0.00           C  
ATOM   2938  C   CNT A 208      12.185  12.905  11.800  0.00  0.00           C  
ATOM   2939  C   CNT A 208      13.312  12.873   9.200  0.00  0.00           C  
ATOM   2940  C   CNT A 208      12.879  11.663   9.770  7.00  0.00           C  
ATOM   2941  C   CNT A 208      12.438  11.672  11.160  1.00  0.00           C  
ATOM   2942  C   CNT A 208      12.186  10.471  11.820  0.00  0.00           C  
ATOM   2943  C   CNT A 208      13.114  10.449   9.170  0.00  0.00           C  
ATOM   2944  C   CNT A 208      13.115   9.262   9.940  3.00  0.00           C  
ATOM   2945  C   CNT A 208      12.547   9.243  11.250  6.00  0.00           C  
ATOM   2946  C   CNT A 208      12.726   8.113  12.060  3.00  0.00           C  
ATOM   2947  C   CNT A 208      13.746   8.108   9.490  3.00  0.00           C  
ATOM   2948  C   CNT A 208      14.002   7.037  10.380  5.00  0.00           C  
ATOM   2949  C   CNT A 208      13.442   7.007  11.680  1.00  0.00           C  
ATOM   2950  C   CNT A 208      13.787   5.969  12.560  6.00  0.00           C  
ATOM   2951  C   CNT A 208      15.003   6.137  10.040  3.00  0.00           C  
ATOM   2952  C   CNT A 208      15.490   5.218  10.990  0.00  0.00           C  
ATOM   2953  C   CNT A 208      14.858   5.166  12.230  6.00  0.00           C  
ATOM   2954  C   CNT A 208      15.390   4.345  13.200  1.00  0.00           C  
ATOM   2955  C   CNT A 208      16.567   4.408  10.700  3.00  0.00           C  
ATOM   2956  C   CNT A 208      17.203   3.684  11.750  2.00  0.00           C  
ATOM   2957  C   CNT A 208      16.629   3.767  12.980  5.00  0.00           C  
ATOM   2958  C   CNT A 208      17.346   3.319  14.080  7.00  0.00           C  
ATOM   2959  C   CNT A 208      18.485   3.161  11.570  0.00  0.00           C  
ATOM   2960  C   CNT A 208      19.294   2.823  12.650  8.00  0.00           C  
ATOM   2961  C   CNT A 208      18.692   2.974  13.910  7.00  0.00           C  
ATOM   2962  C   CNT A 208      19.515   2.861  15.030  1.00  0.00           C  
ATOM   2963  C   CNT A 208      20.678   2.660  12.550  7.00  0.00           C  
ATOM   2964  C   CNT A 208      21.488   2.896  13.650  0.00  0.00           C  
ATOM   2965  C   CNT A 208      20.910   2.966  14.920  0.00  0.00           C  
ATOM   2966  C   CNT A 208      21.690   3.297  15.980  8.00  0.00           C  
ATOM   2967  C   CNT A 208      22.820   3.294  13.420  0.00  0.00           C  
ATOM   2968  C   CNT A 208      23.492   3.909  14.520  8.00  0.00           C  
ATOM   2969  C   CNT A 208      22.981   3.811  15.790  9.00  0.00           C  
ATOM   2970  C   CNT A 208      23.543   4.660  16.770  1.00  0.00           C  
ATOM   2971  C   CNT A 208      24.590   4.641  14.190  6.00  0.00           C  
ATOM   2972  C   CNT A 208      25.115   5.525  15.120  4.00  0.00           C  
ATOM   2973  C   CNT A 208      24.449   5.647  16.360  7.00  0.00           C  
ATOM   2974  C   CNT A 208      24.857   6.628  17.270  4.00  0.00           C  
ATOM   2975  C   CNT A 208      26.129   6.408  14.710  7.00  0.00           C  
ATOM   2976  C   CNT A 208      26.288   7.575  15.540  8.00  0.00           C  
ATOM   2977  C   CNT A 208      25.672   7.630  16.810  8.00  0.00           C  
ATOM   2978  C   CNT A 208      25.917   8.748  17.690  2.00  0.00           C  
ATOM   2979  C   CNT A 208      27.000   8.689  15.110  5.00  0.00           C  
ATOM   2980  C   CNT A 208      27.070   9.842  15.880  4.00  0.00           C  
ATOM   2981  C   CNT A 208      26.467   9.914  17.140  9.00  0.00           C  
ATOM   2982  C   CNT A 208      26.276  11.161  17.900  8.00  0.00           C  
ATOM   2983  C   CNT A 208      27.514  11.036  15.310  1.00  0.00           C  
ATOM   2984  C   CNT A 208      27.162  12.274  15.920  3.00  0.00           C  
ATOM   2985  C   CNT A 208      26.618  12.338  17.240  7.00  0.00           C  
ATOM   2986  C   CNT A 208      26.094  13.540  17.760  5.00  0.00           C  
ATOM   2987  C   CNT A 208      27.100  13.395  15.070  7.00  0.00           C  
ATOM   2988  C   CNT A 208      26.547  14.588  15.570  1.00  0.00           C  
ATOM   2989  C   CNT A 208      25.966  14.663  16.870  8.00  0.00           C  
ATOM   2990  C   CNT A 208      24.926  15.547  17.160  7.00  0.00           C  
ATOM   2991  C   CNT A 208      26.094  15.503  14.600  7.00  0.00           C  
ATOM   2992  C   CNT A 208      24.954  16.317  14.890  4.00  0.00           C  
ATOM   2993  C   CNT A 208      24.378  16.353  16.160  8.00  0.00           C  
ATOM   2994  C   CNT A 208      23.266  17.119  16.440  3.00  0.00           C  
ATOM   2995  C   CNT A 208      24.335  16.909  13.860  8.00  0.00           C  
ATOM   2996  C   CNT A 208      23.007  17.454  14.080  9.00  0.00           C  
ATOM   2997  C   CNT A 208      22.529  17.648  15.370  3.00  0.00           C  
ATOM   2998  C   CNT A 208      21.200  18.070  15.560  4.00  0.00           C  
ATOM   2999  C   CNT A 208      22.209  17.668  12.920  2.00  0.00           C  
ATOM   3000  C   CNT A 208      20.832  17.838  13.150  2.00  0.00           C  
ATOM   3001  C   CNT A 208      20.366  17.961  14.420  1.00  0.00           C  
ATOM   3002  C   CNT A 208      18.945  17.932  14.620  1.00  0.00           C  
ATOM   3003  C   CNT A 208      20.009  17.710  12.020  0.00  0.00           C  
ATOM   3004  C   CNT A 208      18.648  17.759  12.190  7.00  0.00           C  
ATOM   3005  C   CNT A 208      18.147  17.774  13.520  4.00  0.00           C  
ATOM   3006  C   CNT A 208      16.749  17.809  13.650  1.00  0.00           C  
ATOM   3007  C   CNT A 208      17.843  17.526  11.060  8.00  0.00           C  
ATOM   3008  C   CNT A 208      16.496  17.184  11.300  7.00  0.00           C  
ATOM   3009  C   CNT A 208      15.895  17.436  12.570  9.00  0.00           C  
ATOM   3010  C   CNT A 208      14.707  16.808  12.790  5.00  0.00           C  
ATOM   3011  C   CNT A 208      15.757  16.747  10.220  6.00  0.00           C  
ATOM   3012  C   CNT A 208      14.570  16.017  10.460  4.00  0.00           C  
ATOM   3013  C   CNT A 208      14.089  16.034  11.820  0.00  0.00           C  
ATOM   3014  C   CNT A 208      13.085  15.111  12.130  7.00  0.00           C  
ATOM   3015  C   CNT A 208      12.476  15.133  13.450  0.00  0.00           C  
ATOM   3016  C   CNT A 208      11.762  14.002  13.840  6.00  0.00           C  
ATOM   3017  C   CNT A 208      11.344  14.017  15.150  4.00  0.00           C  
ATOM   3018  C   CNT A 208      10.693  12.830  15.710  9.00  0.00           C  
ATOM   3019  C   CNT A 208      11.742  12.845  13.100  3.00  0.00           C  
ATOM   3020  C   CNT A 208      11.344  11.656  13.700  2.00  0.00           C  
ATOM   3021  C   CNT A 208      10.726  11.626  15.010  7.00  0.00           C  
ATOM   3022  C   CNT A 208      10.431  10.393  15.610  0.00  0.00           C  
ATOM   3023  C   CNT A 208      11.584  10.439  13.030  8.00  0.00           C  
ATOM   3024  C   CNT A 208      11.630   9.287  13.860  0.00  0.00           C  
ATOM   3025  C   CNT A 208      10.951   9.186  15.060  8.00  0.00           C  
ATOM   3026  C   CNT A 208      10.881   8.023  15.850  7.00  0.00           C  
ATOM   3027  C   CNT A 208      12.215   8.088  13.370  3.00  0.00           C  
ATOM   3028  C   CNT A 208      12.392   7.038  14.170  5.00  0.00           C  
ATOM   3029  C   CNT A 208      11.734   6.993  15.400  1.00  0.00           C  
ATOM   3030  C   CNT A 208      11.995   5.911  16.290  4.00  0.00           C  
ATOM   3031  C   CNT A 208      13.146   5.913  13.780  6.00  0.00           C  
ATOM   3032  C   CNT A 208      13.657   5.081  14.760  7.00  0.00           C  
ATOM   3033  C   CNT A 208      13.067   5.066  16.020  6.00  0.00           C  
ATOM   3034  C   CNT A 208      13.667   4.364  17.120  2.00  0.00           C  
ATOM   3035  C   CNT A 208      14.826   4.315  14.510  6.00  0.00           C  
ATOM   3036  C   CNT A 208      15.479   3.816  15.570  9.00  0.00           C  
ATOM   3037  C   CNT A 208      14.906   3.778  16.840  5.00  0.00           C  
ATOM   3038  C   CNT A 208      15.655   3.311  17.910  3.00  0.00           C  
ATOM   3039  C   CNT A 208      16.786   3.411  15.360  8.00  0.00           C  
ATOM   3040  C   CNT A 208      17.571   3.105  16.470  9.00  0.00           C  
ATOM   3041  C   CNT A 208      17.016   3.044  17.760  5.00  0.00           C  
ATOM   3042  C   CNT A 208      17.828   3.027  18.870  5.00  0.00           C  
ATOM   3043  C   CNT A 208      18.939   2.882  16.300  7.00  0.00           C  
ATOM   3044  C   CNT A 208      19.813   2.848  17.410  1.00  0.00           C  
ATOM   3045  C   CNT A 208      19.217   3.035  18.670  6.00  0.00           C  
ATOM   3046  C   CNT A 208      20.000   3.519  19.800  5.00  0.00           C  
ATOM   3047  C   CNT A 208      21.131   3.297  17.260  6.00  0.00           C  
ATOM   3048  C   CNT A 208      21.844   3.951  18.310  0.00  0.00           C  
ATOM   3049  C   CNT A 208      21.272   4.026  19.570  1.00  0.00           C  
ATOM   3050  C   CNT A 208      21.911   4.718  20.620  3.00  0.00           C  
ATOM   3051  C   CNT A 208      22.964   4.722  18.040  5.00  0.00           C  
ATOM   3052  C   CNT A 208      23.392   5.674  18.910  1.00  0.00           C  
ATOM   3053  C   CNT A 208      22.852   5.645  20.220  3.00  0.00           C  
ATOM   3054  C   CNT A 208      23.185   6.650  21.140  3.00  0.00           C  
ATOM   3055  C   CNT A 208      24.253   6.696  18.500  3.00  0.00           C  
ATOM   3056  C   CNT A 208      24.443   7.765  19.380  3.00  0.00           C  
ATOM   3057  C   CNT A 208      23.937   7.702  20.660  7.00  0.00           C  
ATOM   3058  C   CNT A 208      24.149   8.790  21.530  2.00  0.00           C  
ATOM   3059  C   CNT A 208      25.252   8.786  18.920  2.00  0.00           C  
ATOM   3060  C   CNT A 208      25.190  10.010  19.710  1.00  0.00           C  
ATOM   3061  C   CNT A 208      24.643   9.949  20.950  5.00  0.00           C  
ATOM   3062  C   CNT A 208      24.527  11.148  21.680  1.00  0.00           C  
ATOM   3063  C   CNT A 208      25.520  11.189  19.040  7.00  0.00           C  
ATOM   3064  C   CNT A 208      25.271  12.337  19.690  1.00  0.00           C  
ATOM   3065  C   CNT A 208      24.681  12.330  20.960  9.00  0.00           C  
ATOM   3066  C   CNT A 208      24.289  13.551  21.540  1.00  0.00           C  
ATOM   3067  C   CNT A 208      25.419  13.539  19.000  7.00  0.00           C  
ATOM   3068  C   CNT A 208      24.782  14.679  19.470  1.00  0.00           C  
ATOM   3069  C   CNT A 208      24.230  14.717  20.730  1.00  0.00           C  
ATOM   3070  C   CNT A 208      23.283  15.714  21.020  9.00  0.00           C  
ATOM   3071  C   CNT A 208      24.363  15.548  18.470  3.00  0.00           C  
ATOM   3072  C   CNT A 208      23.376  16.524  18.780  1.00  0.00           C  
ATOM   3073  C   CNT A 208      22.822  16.647  20.130  2.00  0.00           C  
ATOM   3074  C   CNT A 208      21.590  17.291  20.360  1.00  0.00           C  
ATOM   3075  C   CNT A 208      22.740  17.249  17.750  6.00  0.00           C  
ATOM   3076  C   CNT A 208      21.473  17.827  17.960  9.00  0.00           C  
ATOM   3077  C   CNT A 208      20.916  17.822  19.250  4.00  0.00           C  
ATOM   3078  C   CNT A 208      19.602  18.387  19.430  8.00  0.00           C  
ATOM   3079  C   CNT A 208      20.708  18.187  16.870  7.00  0.00           C  
ATOM   3080  C   CNT A 208      19.303  18.340  17.010  2.00  0.00           C  
ATOM   3081  C   CNT A 208      18.730  18.491  18.270  4.00  0.00           C  
ATOM   3082  C   CNT A 208      17.380  18.483  18.470  7.00  0.00           C  
ATOM   3083  C   CNT A 208      18.471  18.115  15.920  7.00  0.00           C  
ATOM   3084  C   CNT A 208      17.060  18.087  16.120  8.00  0.00           C  
ATOM   3085  C   CNT A 208      16.544  18.215  17.380  7.00  0.00           C  
ATOM   3086  C   CNT A 208      15.166  17.928  17.610  0.00  0.00           C  
ATOM   3087  C   CNT A 208      16.251  17.900  14.970  6.00  0.00           C  
ATOM   3088  C   CNT A 208      14.930  17.423  15.160  6.00  0.00           C  
ATOM   3089  C   CNT A 208      14.345  17.517  16.490  5.00  0.00           C  
ATOM   3090  C   CNT A 208      13.117  16.867  16.740  6.00  0.00           C  
ATOM   3091  C   CNT A 208      14.222  16.738  14.120  1.00  0.00           C  
ATOM   3092  C   CNT A 208      13.029  16.095  14.350  1.00  0.00           C  
ATOM   3093  C   CNT A 208      12.561  16.038  15.690  7.00  0.00           C  
ATOM   3094  C   CNT A 208      11.612  15.086  15.990  1.00  0.00           C  
ATOM   3095  C   CNT A 208      11.092  15.096  17.330  6.00  0.00           C  
ATOM   3096  C   CNT A 208      10.398  13.977  17.830  0.00  0.00           C  
ATOM   3097  C   CNT A 208       9.954  13.947  19.190  3.00  0.00           C  
ATOM   3098  C   CNT A 208       9.436  12.816  19.760  3.00  0.00           C  
ATOM   3099  C   CNT A 208      10.191  12.824  17.020  8.00  0.00           C  
ATOM   3100  C   CNT A 208       9.822  11.616  17.630  6.00  0.00           C  
ATOM   3101  C   CNT A 208       9.457  11.610  19.010  0.00  0.00           C  
ATOM   3102  C   CNT A 208       8.924  10.393  19.560  4.00  0.00           C  
ATOM   3103  C   CNT A 208       9.878  10.364  16.890  8.00  0.00           C  
ATOM   3104  C   CNT A 208       9.588   9.153  17.570  2.00  0.00           C  
ATOM   3105  C   CNT A 208       9.213   9.201  18.940  9.00  0.00           C  
ATOM   3106  C   CNT A 208       9.219   8.021  19.720  9.00  0.00           C  
ATOM   3107  C   CNT A 208      10.225   7.985  17.050  8.00  0.00           C  
ATOM   3108  C   CNT A 208      10.407   6.827  17.900  1.00  0.00           C  
ATOM   3109  C   CNT A 208       9.954   6.879  19.230  5.00  0.00           C  
ATOM   3110  C   CNT A 208      10.257   5.902  20.140  3.00  0.00           C  
ATOM   3111  C   CNT A 208      11.366   5.842  17.520  6.00  0.00           C  
ATOM   3112  C   CNT A 208      11.881   4.983  18.520  3.00  0.00           C  
ATOM   3113  C   CNT A 208      11.340   5.032  19.860  9.00  0.00           C  
ATOM   3114  C   CNT A 208      11.907   4.287  20.850  9.00  0.00           C  
ATOM   3115  C   CNT A 208      13.009   4.233  18.290  0.00  0.00           C  
ATOM   3116  C   CNT A 208      13.689   3.675  19.400  2.00  0.00           C  
ATOM   3117  C   CNT A 208      13.137   3.627  20.640  3.00  0.00           C  
ATOM   3118  C   CNT A 208      13.853   3.221  21.720  5.00  0.00           C  
ATOM   3119  C   CNT A 208      15.017   3.261  19.140  9.00  0.00           C  
ATOM   3120  C   CNT A 208      15.825   3.038  20.280  0.00  0.00           C  
ATOM   3121  C   CNT A 208      15.228   2.952  21.520  4.00  0.00           C  
ATOM   3122  C   CNT A 208      16.057   2.938  22.660  0.00  0.00           C  
ATOM   3123  C   CNT A 208      17.211   3.080  20.120  5.00  0.00           C  
ATOM   3124  C   CNT A 208      18.035   3.398  21.220  6.00  0.00           C  
ATOM   3125  C   CNT A 208      17.475   3.194  22.510  3.00  0.00           C  
ATOM   3126  C   CNT A 208      18.304   3.474  23.640  0.00  0.00           C  
ATOM   3127  C   CNT A 208      19.420   3.603  21.080  1.00  0.00           C  
ATOM   3128  C   CNT A 208      20.231   3.948  22.150  8.00  0.00           C  
ATOM   3129  C   CNT A 208      19.602   4.030  23.450  7.00  0.00           C  
ATOM   3130  C   CNT A 208      20.149   4.904  24.350  8.00  0.00           C  
ATOM   3131  C   CNT A 208      21.443   4.678  21.900  0.00  0.00           C  
ATOM   3132  C   CNT A 208      21.895   5.609  22.850  0.00  0.00           C  
ATOM   3133  C   CNT A 208      21.245   5.664  24.090  4.00  0.00           C  
ATOM   3134  C   CNT A 208      21.598   6.624  25.030  3.00  0.00           C  
ATOM   3135  C   CNT A 208      22.719   6.641  22.420  4.00  0.00           C  
ATOM   3136  C   CNT A 208      23.048   7.665  23.350  8.00  0.00           C  
ATOM   3137  C   CNT A 208      22.426   7.689  24.680  4.00  0.00           C  
ATOM   3138  C   CNT A 208      22.509   8.893  25.430  5.00  0.00           C  
ATOM   3139  C   CNT A 208      23.710   8.809  22.870  4.00  0.00           C  
ATOM   3140  C   CNT A 208      23.681   9.987  23.620  7.00  0.00           C  
ATOM   3141  C   CNT A 208      23.150   9.998  24.880  4.00  0.00           C  
ATOM   3142  C   CNT A 208      22.966  11.194  25.540  2.00  0.00           C  
ATOM   3143  C   CNT A 208      23.983  11.157  22.950  6.00  0.00           C  
ATOM   3144  C   CNT A 208      23.563  12.387  23.520  9.00  0.00           C  
ATOM   3145  C   CNT A 208      23.136  12.381  24.910  0.00  0.00           C  
ATOM   3146  C   CNT A 208      22.630  13.574  25.410  0.00  0.00           C  
ATOM   3147  C   CNT A 208      23.602  13.591  22.770  5.00  0.00           C  
ATOM   3148  C   CNT A 208      23.005  14.710  23.230  9.00  0.00           C  
ATOM   3149  C   CNT A 208      22.530  14.729  24.600  5.00  0.00           C  
ATOM   3150  C   CNT A 208      21.582  15.720  24.940  9.00  0.00           C  
ATOM   3151  C   CNT A 208      22.658  15.637  22.310  2.00  0.00           C  
ATOM   3152  C   CNT A 208      21.626  16.490  22.660  0.00  0.00           C  
ATOM   3153  C   CNT A 208      21.118  16.559  23.940  0.00  0.00           C  
ATOM   3154  C   CNT A 208      19.980  17.359  24.190  6.00  0.00           C  
ATOM   3155  C   CNT A 208      21.039  17.292  21.630  6.00  0.00           C  
ATOM   3156  C   CNT A 208      19.769  17.832  21.790  5.00  0.00           C  
ATOM   3157  C   CNT A 208      19.233  17.802  23.100  4.00  0.00           C  
ATOM   3158  C   CNT A 208      17.923  18.148  23.270  6.00  0.00           C  
ATOM   3159  C   CNT A 208      19.022  18.318  20.730  1.00  0.00           C  
ATOM   3160  C   CNT A 208      17.664  18.507  20.870  3.00  0.00           C  
ATOM   3161  C   CNT A 208      17.107  18.484  22.160  8.00  0.00           C  
ATOM   3162  C   CNT A 208      15.737  18.424  22.360  0.00  0.00           C  
ATOM   3163  C   CNT A 208      16.861  18.420  19.780  0.00  0.00           C  
ATOM   3164  C   CNT A 208      15.410  18.161  19.980  4.00  0.00           C  
ATOM   3165  C   CNT A 208      14.884  18.316  21.250  8.00  0.00           C  
ATOM   3166  C   CNT A 208      13.532  17.990  21.440  3.00  0.00           C  
ATOM   3167  C   CNT A 208      14.659  17.814  18.880  8.00  0.00           C  
ATOM   3168  C   CNT A 208      13.303  17.453  19.110  0.00  0.00           C  
ATOM   3169  C   CNT A 208      12.761  17.549  20.320  9.00  0.00           C  
ATOM   3170  C   CNT A 208      11.514  16.970  20.580  8.00  0.00           C  
ATOM   3171  C   CNT A 208      12.619  16.879  18.040  9.00  0.00           C  
ATOM   3172  C   CNT A 208      11.450  16.087  18.280  8.00  0.00           C  
ATOM   3173  C   CNT A 208      10.954  16.155  19.620  8.00  0.00           C  
ATOM   3174  C   CNT A 208      10.161  15.111  20.040  7.00  0.00           C  
ATOM   3175  C   CNT A 208       9.529  15.124  21.290  0.00  0.00           C  
ATOM   3176  C   CNT A 208       8.781  14.028  21.700  6.00  0.00           C  
ATOM   3177  C   CNT A 208       8.232  14.037  22.970  6.00  0.00           C  
ATOM   3178  C   CNT A 208       7.657  12.869  23.510  1.00  0.00           C  
ATOM   3179  C   CNT A 208       8.793  12.852  20.980  2.00  0.00           C  
ATOM   3180  C   CNT A 208       8.267  11.686  21.560  5.00  0.00           C  
ATOM   3181  C   CNT A 208       7.688  11.657  22.800  7.00  0.00           C  
ATOM   3182  C   CNT A 208       7.387  10.409  23.370  5.00  0.00           C  
ATOM   3183  C   CNT A 208       8.450  10.472  20.870  9.00  0.00           C  
ATOM   3184  C   CNT A 208       8.320   9.234  21.590  2.00  0.00           C  
ATOM   3185  C   CNT A 208       7.746   9.224  22.810  4.00  0.00           C  
ATOM   3186  C   CNT A 208       7.654   8.084  23.600  6.00  0.00           C  
ATOM   3187  C   CNT A 208       8.834   8.091  21.040  9.00  0.00           C  
ATOM   3188  C   CNT A 208       8.966   6.997  21.870  7.00  0.00           C  
ATOM   3189  C   CNT A 208       8.419   7.006  23.150  3.00  0.00           C  
ATOM   3190  C   CNT A 208       8.628   5.896  24.000  1.00  0.00           C  
ATOM   3191  C   CNT A 208       9.633   5.862  21.380  2.00  0.00           C  
ATOM   3192  C   CNT A 208      10.085   4.951  22.340  8.00  0.00           C  
ATOM   3193  C   CNT A 208       9.626   4.987  23.680  4.00  0.00           C  
ATOM   3194  C   CNT A 208      10.247   4.350  24.740  6.00  0.00           C  
ATOM   3195  C   CNT A 208      11.251   4.227  22.100  4.00  0.00           C  
ATOM   3196  C   CNT A 208      11.904   3.557  23.160  5.00  0.00           C  
ATOM   3197  C   CNT A 208      11.463   3.702  24.490  7.00  0.00           C  
ATOM   3198  C   CNT A 208      12.214   3.243  25.580  8.00  0.00           C  
ATOM   3199  C   CNT A 208      13.294   3.267  22.980  0.00  0.00           C  
ATOM   3200  C   CNT A 208      14.130   2.956  24.120  0.00  0.00           C  
ATOM   3201  C   CNT A 208      13.579   3.087  25.410  8.00  0.00           C  
ATOM   3202  C   CNT A 208      14.473   2.952  26.510  5.00  0.00           C  
ATOM   3203  C   CNT A 208      15.532   3.050  23.930  9.00  0.00           C  
ATOM   3204  C   CNT A 208      16.350   3.197  25.060  4.00  0.00           C  
ATOM   3205  C   CNT A 208      15.853   3.106  26.320  1.00  0.00           C  
ATOM   3206  C   CNT A 208      16.595   3.510  27.460  2.00  0.00           C  
ATOM   3207  C   CNT A 208      17.714   3.500  24.920  2.00  0.00           C  
ATOM   3208  C   CNT A 208      18.420   4.098  25.950  5.00  0.00           C  
ATOM   3209  C   CNT A 208      17.875   4.083  27.230  9.00  0.00           C  
ATOM   3210  C   CNT A 208      18.395   4.885  28.260  3.00  0.00           C  
ATOM   3211  C   CNT A 208      19.643   4.796  25.710  0.00  0.00           C  
ATOM   3212  C   CNT A 208      20.132   5.628  26.730  2.00  0.00           C  
ATOM   3213  C   CNT A 208      19.497   5.684  27.930  7.00  0.00           C  
ATOM   3214  C   CNT A 208      19.891   6.697  28.800  5.00  0.00           C  
ATOM   3215  C   CNT A 208      21.084   6.620  26.340  1.00  0.00           C  
ATOM   3216  C   CNT A 208      21.288   7.742  27.160  4.00  0.00           C  
ATOM   3217  C   CNT A 208      20.656   7.775  28.420  3.00  0.00           C  
ATOM   3218  C   CNT A 208      20.907   8.850  29.230  7.00  0.00           C  
ATOM   3219  C   CNT A 208      22.163   8.810  26.780  0.00  0.00           C  
ATOM   3220  C   CNT A 208      22.119  10.007  27.500  6.00  0.00           C  
ATOM   3221  C   CNT A 208      21.535  10.015  28.760  0.00  0.00           C  
ATOM   3222  C   CNT A 208      21.474  11.248  29.460  7.00  0.00           C  
ATOM   3223  C   CNT A 208      22.539  11.204  26.850  6.00  0.00           C  
ATOM   3224  C   CNT A 208      22.214  12.436  27.460  7.00  0.00           C  
ATOM   3225  C   CNT A 208      21.709  12.432  28.790  8.00  0.00           C  
ATOM   3226  C   CNT A 208      21.140  13.624  29.260  6.00  0.00           C  
ATOM   3227  C   CNT A 208      22.130  13.604  26.710  6.00  0.00           C  
ATOM   3228  C   CNT A 208      21.456  14.699  27.100  9.00  0.00           C  
ATOM   3229  C   CNT A 208      20.921  14.727  28.400  9.00  0.00           C  
ATOM   3230  C   CNT A 208      19.995  15.689  28.790  3.00  0.00           C  
ATOM   3231  C   CNT A 208      21.132  15.685  26.240  0.00  0.00           C  
ATOM   3232  C   CNT A 208      20.080  16.559  26.550  7.00  0.00           C  
ATOM   3233  C   CNT A 208      19.459  16.492  27.820  3.00  0.00           C  
ATOM   3234  C   CNT A 208      18.298  17.172  28.000  7.00  0.00           C  
ATOM   3235  C   CNT A 208      19.473  17.301  25.480  3.00  0.00           C  
ATOM   3236  C   CNT A 208      18.148  17.783  25.710  9.00  0.00           C  
ATOM   3237  C   CNT A 208      17.621  17.793  26.970  9.00  0.00           C  
ATOM   3238  C   CNT A 208      16.337  18.322  27.180  2.00  0.00           C  
ATOM   3239  C   CNT A 208      17.394  18.237  24.610  2.00  0.00           C  
ATOM   3240  C   CNT A 208      15.999  18.361  24.710  7.00  0.00           C  
ATOM   3241  C   CNT A 208      15.488  18.493  26.060  5.00  0.00           C  
ATOM   3242  C   CNT A 208      14.105  18.636  26.210  0.00  0.00           C  
ATOM   3243  C   CNT A 208      15.152  18.392  23.630  3.00  0.00           C  
ATOM   3244  C   CNT A 208      13.792  18.296  23.840  2.00  0.00           C  
ATOM   3245  C   CNT A 208      13.256  18.494  25.110  0.00  0.00           C  
ATOM   3246  C   CNT A 208      11.906  18.101  25.310  0.00  0.00           C  
ATOM   3247  C   CNT A 208      12.988  17.966  22.720  8.00  0.00           C  
ATOM   3248  C   CNT A 208      11.635  17.688  22.940  7.00  0.00           C  
ATOM   3249  C   CNT A 208      11.147  17.606  24.240  1.00  0.00           C  
ATOM   3250  C   CNT A 208       9.984  16.854  24.480  8.00  0.00           C  
ATOM   3251  C   CNT A 208      10.908  17.079  21.890  9.00  0.00           C  
ATOM   3252  C   CNT A 208       9.970  16.044  22.230  5.00  0.00           C  
ATOM   3253  C   CNT A 208       9.450  15.974  23.500  8.00  0.00           C  
ATOM   3254  C   CNT A 208       8.477  15.040  23.860  9.00  0.00           C  
ATOM   3255  C   CNT A 208       7.895  15.101  25.140  5.00  0.00           C  
ATOM   3256  C   CNT A 208       7.077  14.024  25.590  4.00  0.00           C  
ATOM   3257  C   CNT A 208       6.589  13.946  26.870  8.00  0.00           C  
ATOM   3258  C   CNT A 208       5.866  12.837  27.320  0.00  0.00           C  
ATOM   3259  C   CNT A 208       6.990  12.893  24.700  9.00  0.00           C  
ATOM   3260  C   CNT A 208       6.350  11.667  25.220  8.00  0.00           C  
ATOM   3261  C   CNT A 208       5.868  11.678  26.520  7.00  0.00           C  
ATOM   3262  C   CNT A 208       5.598  10.427  27.190  5.00  0.00           C  
ATOM   3263  C   CNT A 208       6.679  10.414  24.560  1.00  0.00           C  
ATOM   3264  C   CNT A 208       6.497   9.250  25.320  0.00  0.00           C  
ATOM   3265  C   CNT A 208       5.946   9.196  26.630  0.00  0.00           C  
ATOM   3266  C   CNT A 208       5.855   8.015  27.360  9.00  0.00           C  
ATOM   3267  C   CNT A 208       6.963   8.026  24.800  8.00  0.00           C  
ATOM   3268  C   CNT A 208       7.041   6.914  25.630  5.00  0.00           C  
ATOM   3269  C   CNT A 208       6.533   6.909  26.940  6.00  0.00           C  
ATOM   3270  C   CNT A 208       6.791   5.810  27.810  1.00  0.00           C  
ATOM   3271  C   CNT A 208       7.952   5.908  25.250  1.00  0.00           C  
ATOM   3272  C   CNT A 208       8.374   4.975  26.240  1.00  0.00           C  
ATOM   3273  C   CNT A 208       7.830   4.986  27.510  4.00  0.00           C  
ATOM   3274  C   CNT A 208       8.537   4.338  28.560  3.00  0.00           C  
ATOM   3275  C   CNT A 208       9.624   4.265  25.990  8.00  0.00           C  
ATOM   3276  C   CNT A 208      10.354   3.695  27.050  7.00  0.00           C  
ATOM   3277  C   CNT A 208       9.795   3.842  28.320  4.00  0.00           C  
ATOM   3278  C   CNT A 208      10.576   3.476  29.450  7.00  0.00           C  
ATOM   3279  C   CNT A 208      11.691   3.215  26.870  0.00  0.00           C  
ATOM   3280  C   CNT A 208      12.540   3.007  27.940  5.00  0.00           C  
ATOM   3281  C   CNT A 208      11.952   3.142  29.260  5.00  0.00           C  
ATOM   3282  C   CNT A 208      12.811   3.072  30.400  9.00  0.00           C  
ATOM   3283  C   CNT A 208      13.923   3.036  27.830  1.00  0.00           C  
ATOM   3284  C   CNT A 208      14.703   3.086  28.930  6.00  0.00           C  
ATOM   3285  C   CNT A 208      14.186   3.071  30.230  8.00  0.00           C  
ATOM   3286  C   CNT A 208      14.922   3.618  31.360  7.00  0.00           C  
ATOM   3287  C   CNT A 208      16.031   3.574  28.750  4.00  0.00           C  
ATOM   3288  C   CNT A 208      16.649   4.253  29.780  6.00  0.00           C  
ATOM   3289  C   CNT A 208      16.171   4.164  31.130  4.00  0.00           C  
ATOM   3290  C   CNT A 208      16.824   4.789  32.160  7.00  0.00           C  
ATOM   3291  C   CNT A 208      17.835   4.899  29.510  1.00  0.00           C  
ATOM   3292  C   CNT A 208      18.462   5.643  30.530  4.00  0.00           C  
ATOM   3293  C   CNT A 208      17.963   5.567  31.830  6.00  0.00           C  
ATOM   3294  C   CNT A 208      18.300   6.589  32.730  7.00  0.00           C  
ATOM   3295  C   CNT A 208      19.484   6.568  30.180  2.00  0.00           C  
ATOM   3296  C   CNT A 208      19.706   7.687  30.950  6.00  0.00           C  
ATOM   3297  C   CNT A 208      19.146   7.704  32.270  9.00  0.00           C  
ATOM   3298  C   CNT A 208      19.242   8.835  33.080  2.00  0.00           C  
ATOM   3299  C   CNT A 208      20.340   8.831  30.490  2.00  0.00           C  
ATOM   3300  C   CNT A 208      20.259  10.027  31.240  5.00  0.00           C  
ATOM   3301  C   CNT A 208      19.803  10.031  32.600  9.00  0.00           C  
ATOM   3302  C   CNT A 208      19.688  11.234  33.270  8.00  0.00           C  
ATOM   3303  C   CNT A 208      20.793  11.199  30.720  8.00  0.00           C  
ATOM   3304  C   CNT A 208      20.445  12.455  31.320  2.00  0.00           C  
ATOM   3305  C   CNT A 208      19.973  12.453  32.630  2.00  0.00           C  
ATOM   3306  C   CNT A 208      19.391  13.624  33.210  8.00  0.00           C  
ATOM   3307  C   CNT A 208      20.484  13.578  30.520  7.00  0.00           C  
ATOM   3308  C   CNT A 208      19.774  14.688  30.970  2.00  0.00           C  
ATOM   3309  C   CNT A 208      19.166  14.633  32.270  5.00  0.00           C  
ATOM   3310  C   CNT A 208      18.315  15.751  32.610  1.00  0.00           C  
ATOM   3311  C   CNT A 208      19.471  15.677  30.070  3.00  0.00           C  
ATOM   3312  C   CNT A 208      18.418  16.609  30.360  1.00  0.00           C  
ATOM   3313  C   CNT A 208      17.868  16.574  31.620  4.00  0.00           C  
ATOM   3314  C   CNT A 208      16.702  17.318  31.840  9.00  0.00           C  
ATOM   3315  C   CNT A 208      17.816  17.322  29.310  0.00  0.00           C  
ATOM   3316  C   CNT A 208      16.586  17.989  29.540  9.00  0.00           C  
ATOM   3317  C   CNT A 208      16.131  18.126  30.830  0.00  0.00           C  
ATOM   3318  C   CNT A 208      14.791  18.559  31.020  4.00  0.00           C  
ATOM   3319  C   CNT A 208      15.785  18.418  28.440  2.00  0.00           C  
ATOM   3320  C   CNT A 208      14.440  18.577  28.630  0.00  0.00           C  
ATOM   3321  C   CNT A 208      13.920  18.695  29.940  1.00  0.00           C  
ATOM   3322  C   CNT A 208      12.519  18.552  30.100  3.00  0.00           C  
ATOM   3323  C   CNT A 208      13.559  18.630  27.500  8.00  0.00           C  
ATOM   3324  C   CNT A 208      12.212  18.450  27.650  3.00  0.00           C  
ATOM   3325  C   CNT A 208      11.669  18.550  28.940  7.00  0.00           C  
ATOM   3326  C   CNT A 208      10.306  18.224  29.140  4.00  0.00           C  
ATOM   3327  C   CNT A 208      11.326  18.122  26.610  1.00  0.00           C  
ATOM   3328  C   CNT A 208      10.076  17.633  26.770  9.00  0.00           C  
ATOM   3329  C   CNT A 208       9.578  17.615  28.100  1.00  0.00           C  
ATOM   3330  C   CNT A 208       8.412  16.886  28.360  9.00  0.00           C  
ATOM   3331  C   CNT A 208       9.455  16.824  25.800  8.00  0.00           C  
ATOM   3332  C   CNT A 208       8.395  16.006  26.120  4.00  0.00           C  
ATOM   3333  C   CNT A 208       7.844  16.017  27.420  8.00  0.00           C  
ATOM   3334  C   CNT A 208       6.919  15.031  27.740  8.00  0.00           C  
ATOM   3335  C   CNT A 208       6.477  14.943  29.060  9.00  0.00           C  
ATOM   3336  C   CNT A 208       5.525  13.934  29.430  9.00  0.00           C  
ATOM   3337  C   CNT A 208       4.840  14.090  30.680  7.00  0.00           C  
ATOM   3338  C   CNT A 208       4.150  13.001  31.120  3.00  0.00           C  
ATOM   3339  C   CNT A 208       5.293  12.832  28.590  4.00  0.00           C  
ATOM   3340  C   CNT A 208       4.776  11.726  29.130  8.00  0.00           C  
ATOM   3341  C   CNT A 208       4.134  11.790  30.380  8.00  0.00           C  
ATOM   3342  C   CNT A 208       3.859  10.578  31.070  5.00  0.00           C  
ATOM   3343  C   CNT A 208       5.054  10.486  28.450  7.00  0.00           C  
ATOM   3344  C   CNT A 208       4.746   9.289  29.130  4.00  0.00           C  
ATOM   3345  C   CNT A 208       4.239   9.369  30.440  9.00  0.00           C  
ATOM   3346  C   CNT A 208       4.428   8.294  31.300  3.00  0.00           C  
ATOM   3347  C   CNT A 208       5.328   8.075  28.690  5.00  0.00           C  
ATOM   3348  C   CNT A 208       5.654   7.049  29.590  4.00  0.00           C  
ATOM   3349  C   CNT A 208       5.126   7.149  30.870  2.00  0.00           C  
ATOM   3350  C   CNT A 208       5.270   6.048  31.730  3.00  0.00           C  
ATOM   3351  C   CNT A 208       6.392   5.939  29.140  3.00  0.00           C  
ATOM   3352  C   CNT A 208       6.868   5.136  30.110  8.00  0.00           C  
ATOM   3353  C   CNT A 208       6.259   5.124  31.410  4.00  0.00           C  
ATOM   3354  C   CNT A 208       6.823   4.303  32.370  4.00  0.00           C  
ATOM   3355  C   CNT A 208       7.967   4.378  29.830  3.00  0.00           C  
ATOM   3356  C   CNT A 208       8.780   3.971  30.950  6.00  0.00           C  
ATOM   3357  C   CNT A 208       8.167   3.947  32.230  0.00  0.00           C  
ATOM   3358  C   CNT A 208       8.931   3.490  33.300  6.00  0.00           C  
ATOM   3359  C   CNT A 208      10.045   3.523  30.720  1.00  0.00           C  
ATOM   3360  C   CNT A 208      10.823   3.212  31.860  6.00  0.00           C  
ATOM   3361  C   CNT A 208      10.281   3.230  33.170  3.00  0.00           C  
ATOM   3362  C   CNT A 208      11.103   3.176  34.230  9.00  0.00           C  
ATOM   3363  C   CNT A 208      12.181   3.141  31.640  2.00  0.00           C  
ATOM   3364  C   CNT A 208      12.992   3.298  32.800  1.00  0.00           C  
ATOM   3365  C   CNT A 208      12.488   3.233  34.060  9.00  0.00           C  
ATOM   3366  C   CNT A 208      13.231   3.703  35.130  5.00  0.00           C  
ATOM   3367  C   CNT A 208      14.351   3.602  32.590  3.00  0.00           C  
ATOM   3368  C   CNT A 208      15.064   4.156  33.650  2.00  0.00           C  
ATOM   3369  C   CNT A 208      14.520   4.186  34.990  4.00  0.00           C  
ATOM   3370  C   CNT A 208      15.120   4.995  35.930  9.00  0.00           C  
ATOM   3371  C   CNT A 208      16.211   4.860  33.380  3.00  0.00           C  
ATOM   3372  C   CNT A 208      16.628   5.817  34.290  9.00  0.00           C  
ATOM   3373  C   CNT A 208      16.150   5.843  35.610  0.00  0.00           C  
ATOM   3374  C   CNT A 208      16.561   6.733  36.560  1.00  0.00           C  
ATOM   3375  C   CNT A 208      17.630   6.686  33.950  9.00  0.00           C  
ATOM   3376  C   CNT A 208      17.905   7.765  34.810  9.00  0.00           C  
ATOM   3377  C   CNT A 208      17.414   7.791  36.120  6.00  0.00           C  
ATOM   3378  C   CNT A 208      17.612   8.924  36.960  2.00  0.00           C  
ATOM   3379  C   CNT A 208      18.691   8.837  34.350  1.00  0.00           C  
ATOM   3380  C   CNT A 208      18.775  10.053  35.120  3.00  0.00           C  
ATOM   3381  C   CNT A 208      18.273  10.026  36.420  8.00  0.00           C  
ATOM   3382  C   CNT A 208      18.049  11.280  37.110  8.00  0.00           C  
ATOM   3383  C   CNT A 208      19.225  11.242  34.550  4.00  0.00           C  
ATOM   3384  C   CNT A 208      18.858  12.474  35.190  9.00  0.00           C  
ATOM   3385  C   CNT A 208      18.260  12.512  36.440  2.00  0.00           C  
ATOM   3386  C   CNT A 208      17.873  13.781  37.000  3.00  0.00           C  
ATOM   3387  C   CNT A 208      18.832  13.647  34.440  0.00  0.00           C  
ATOM   3388  C   CNT A 208      18.193  14.828  34.840  2.00  0.00           C  
ATOM   3389  C   CNT A 208      17.718  14.865  36.150  0.00  0.00           C  
ATOM   3390  C   CNT A 208      16.750  15.845  36.490  4.00  0.00           C  
ATOM   3391  C   CNT A 208      17.801  15.774  33.910  5.00  0.00           C  
ATOM   3392  C   CNT A 208      16.777  16.705  34.250  5.00  0.00           C  
ATOM   3393  C   CNT A 208      16.258  16.708  35.500  6.00  0.00           C  
ATOM   3394  C   CNT A 208      15.139  17.501  35.790  5.00  0.00           C  
ATOM   3395  C   CNT A 208      16.213  17.337  33.160  8.00  0.00           C  
ATOM   3396  C   CNT A 208      14.966  17.935  33.400  4.00  0.00           C  
ATOM   3397  C   CNT A 208      14.417  18.099  34.680  8.00  0.00           C  
ATOM   3398  C   CNT A 208      13.049  18.297  34.890  0.00  0.00           C  
ATOM   3399  C   CNT A 208      14.188  18.395  32.320  6.00  0.00           C  
ATOM   3400  C   CNT A 208      12.779  18.571  32.470  9.00  0.00           C  
ATOM   3401  C   CNT A 208      12.248  18.637  33.800  0.00  0.00           C  
ATOM   3402  C   CNT A 208      10.856  18.746  33.970  9.00  0.00           C  
ATOM   3403  C   CNT A 208      11.924  18.675  31.360  7.00  0.00           C  
ATOM   3404  C   CNT A 208      10.586  18.520  31.560  8.00  0.00           C  
ATOM   3405  C   CNT A 208      10.074  18.527  32.840  9.00  0.00           C  
ATOM   3406  C   CNT A 208       8.785  18.095  33.050  1.00  0.00           C  
ATOM   3407  C   CNT A 208       9.780  18.188  30.440  5.00  0.00           C  
ATOM   3408  C   CNT A 208       8.529  17.498  30.700  4.00  0.00           C  
ATOM   3409  C   CNT A 208       8.049  17.509  32.020  7.00  0.00           C  
ATOM   3410  C   CNT A 208       6.799  16.865  32.250  3.00  0.00           C  
ATOM   3411  C   CNT A 208       7.836  16.876  29.640  8.00  0.00           C  
ATOM   3412  C   CNT A 208       6.832  15.947  29.960  9.00  0.00           C  
ATOM   3413  C   CNT A 208       6.277  16.031  31.270  0.00  0.00           C  
ATOM   3414  C   CNT A 208       5.186  15.219  31.570  6.00  0.00           C  
ATOM   3415  C   CNT A 208       4.687  15.174  32.850  4.00  0.00           C  
ATOM   3416  C   CNT A 208       3.940  14.099  33.310  0.00  0.00           C  
ATOM   3417  C   CNT A 208       3.278  14.175  34.530  4.00  0.00           C  
ATOM   3418  C   CNT A 208       2.525  13.009  34.970  5.00  0.00           C  
ATOM   3419  C   CNT A 208       3.726  12.987  32.470  4.00  0.00           C  
ATOM   3420  C   CNT A 208       3.163  11.797  33.010  4.00  0.00           C  
ATOM   3421  C   CNT A 208       2.560  11.837  34.240  9.00  0.00           C  
ATOM   3422  C   CNT A 208       2.251  10.640  34.940  9.00  0.00           C  
ATOM   3423  C   CNT A 208       3.350  10.594  32.370  0.00  0.00           C  
ATOM   3424  C   CNT A 208       3.191   9.374  33.070  0.00  0.00           C  
ATOM   3425  C   CNT A 208       2.626   9.370  34.370  7.00  0.00           C  
ATOM   3426  C   CNT A 208       2.573   8.160  35.090  1.00  0.00           C  
ATOM   3427  C   CNT A 208       3.806   8.221  32.550  8.00  0.00           C  
ATOM   3428  C   CNT A 208       3.786   7.051  33.300  2.00  0.00           C  
ATOM   3429  C   CNT A 208       3.337   7.047  34.650  6.00  0.00           C  
ATOM   3430  C   CNT A 208       3.626   6.020  35.500  4.00  0.00           C  
ATOM   3431  C   CNT A 208       4.684   6.010  32.940  6.00  0.00           C  
ATOM   3432  C   CNT A 208       5.229   5.202  33.940  7.00  0.00           C  
ATOM   3433  C   CNT A 208       4.645   5.142  35.230  2.00  0.00           C  
ATOM   3434  C   CNT A 208       5.282   4.409  36.240  1.00  0.00           C  
ATOM   3435  C   CNT A 208       6.294   4.315  33.690  6.00  0.00           C  
ATOM   3436  C   CNT A 208       7.032   3.767  34.730  7.00  0.00           C  
ATOM   3437  C   CNT A 208       6.470   3.664  35.990  9.00  0.00           C  
ATOM   3438  C   CNT A 208       7.244   3.283  37.120  5.00  0.00           C  
ATOM   3439  C   CNT A 208       8.332   3.232  34.540  8.00  0.00           C  
ATOM   3440  C   CNT A 208       9.155   3.087  35.660  2.00  0.00           C  
ATOM   3441  C   CNT A 208       8.671   3.138  36.950  8.00  0.00           C  
ATOM   3442  C   CNT A 208       9.532   3.055  38.060  5.00  0.00           C  
ATOM   3443  C   CNT A 208      10.566   2.999  35.510  4.00  0.00           C  
ATOM   3444  C   CNT A 208      11.416   3.193  36.610  0.00  0.00           C  
ATOM   3445  C   CNT A 208      10.878   3.233  37.870  3.00  0.00           C  
ATOM   3446  C   CNT A 208      11.626   3.727  38.960  2.00  0.00           C  
ATOM   3447  C   CNT A 208      12.737   3.581  36.410  5.00  0.00           C  
ATOM   3448  C   CNT A 208      13.459   4.209  37.490  6.00  0.00           C  
ATOM   3449  C   CNT A 208      12.920   4.300  38.770  8.00  0.00           C  
ATOM   3450  C   CNT A 208      13.579   4.907  39.840  2.00  0.00           C  
ATOM   3451  C   CNT A 208      14.591   5.008  37.180  4.00  0.00           C  
ATOM   3452  C   CNT A 208      15.054   5.831  38.190  0.00  0.00           C  
ATOM   3453  C   CNT A 208      14.635   5.821  39.520  3.00  0.00           C  
ATOM   3454  C   CNT A 208      14.958   6.862  40.430  8.00  0.00           C  
ATOM   3455  C   CNT A 208      15.991   6.820  37.830  5.00  0.00           C  
ATOM   3456  C   CNT A 208      16.225   7.857  38.710  5.00  0.00           C  
ATOM   3457  C   CNT A 208      15.800   7.866  40.030  7.00  0.00           C  
ATOM   3458  C   CNT A 208      16.054   8.936  40.920  8.00  0.00           C  
ATOM   3459  C   CNT A 208      17.056   8.906  38.270  1.00  0.00           C  
ATOM   3460  C   CNT A 208      17.200  10.089  39.070  3.00  0.00           C  
ATOM   3461  C   CNT A 208      16.613  10.120  40.330  8.00  0.00           C  
ATOM   3462  C   CNT A 208      16.396  11.343  40.970  4.00  0.00           C  
ATOM   3463  C   CNT A 208      17.620  11.300  38.480  9.00  0.00           C  
ATOM   3464  C   CNT A 208      17.342  12.538  39.070  6.00  0.00           C  
ATOM   3465  C   CNT A 208      16.578  12.520  40.310  1.00  0.00           C  
ATOM   3466  C   CNT A 208      16.084  13.688  40.810  2.00  0.00           C  
ATOM   3467  C   CNT A 208      17.283  13.666  38.280  0.00  0.00           C  
ATOM   3468  C   CNT A 208      16.480  14.803  38.680  4.00  0.00           C  
ATOM   3469  C   CNT A 208      15.985  14.814  39.970  9.00  0.00           C  
ATOM   3470  C   CNT A 208      15.054  15.844  40.330  0.00  0.00           C  
ATOM   3471  C   CNT A 208      16.107  15.723  37.740  9.00  0.00           C  
ATOM   3472  C   CNT A 208      15.054  16.582  38.040  6.00  0.00           C  
ATOM   3473  C   CNT A 208      14.567  16.677  39.360  5.00  0.00           C  
ATOM   3474  C   CNT A 208      13.397  17.475  39.630  1.00  0.00           C  
ATOM   3475  C   CNT A 208      14.474  17.398  37.060  4.00  0.00           C  
ATOM   3476  C   CNT A 208      13.228  17.894  37.290  2.00  0.00           C  
ATOM   3477  C   CNT A 208      12.680  18.040  38.560  6.00  0.00           C  
ATOM   3478  C   CNT A 208      11.366  18.468  38.740  0.00  0.00           C  
ATOM   3479  C   CNT A 208      12.505  18.411  36.200  9.00  0.00           C  
ATOM   3480  C   CNT A 208      11.157  18.669  36.370  6.00  0.00           C  
ATOM   3481  C   CNT A 208      10.578  18.721  37.660  5.00  0.00           C  
ATOM   3482  C   CNT A 208       9.173  18.707  37.810  5.00  0.00           C  
ATOM   3483  C   CNT A 208      10.339  18.730  35.250  6.00  0.00           C  
ATOM   3484  C   CNT A 208       8.881  18.646  35.430  0.00  0.00           C  
ATOM   3485  C   CNT A 208       8.273  18.616  36.700  4.00  0.00           C  
ATOM   3486  C   CNT A 208       6.883  18.294  36.860  9.00  0.00           C  
ATOM   3487  C   CNT A 208       8.217  18.076  34.370  6.00  0.00           C  
ATOM   3488  C   CNT A 208       6.868  17.664  34.530  5.00  0.00           C  
ATOM   3489  C   CNT A 208       6.250  17.625  35.780  6.00  0.00           C  
ATOM   3490  C   CNT A 208       5.104  16.909  36.110  0.00  0.00           C  
ATOM   3491  C   CNT A 208       6.234  16.962  33.470  7.00  0.00           C  
ATOM   3492  C   CNT A 208       5.072  16.162  33.810  1.00  0.00           C  
ATOM   3493  C   CNT A 208       4.528  16.097  35.100  6.00  0.00           C  
ATOM   3494  C   CNT A 208       3.582  15.127  35.470  6.00  0.00           C  
ATOM   3495  C   CNT A 208       3.050  15.163  36.740  9.00  0.00           C  
ATOM   3496  C   CNT A 208       2.135  14.135  37.120  4.00  0.00           C  
ATOM   3497  C   CNT A 208       1.633  14.189  38.420  7.00  0.00           C  
ATOM   3498  C   CNT A 208       0.882  13.077  38.910  1.00  0.00           C  
ATOM   3499  C   CNT A 208       2.059  13.028  36.280  0.00  0.00           C  
ATOM   3500  C   CNT A 208       1.677  11.809  36.930  0.00  0.00           C  
ATOM   3501  C   CNT A 208       1.076  11.842  38.220  6.00  0.00           C  
ATOM   3502  C   CNT A 208       0.738  10.671  38.860  8.00  0.00           C  
ATOM   3503  C   CNT A 208       1.811  10.644  36.280  0.00  0.00           C  
ATOM   3504  C   CNT A 208       1.699   9.414  37.000  0.00  0.00           C  
ATOM   3505  C   CNT A 208       1.214   9.476  38.300  1.00  0.00           C  
ATOM   3506  C   CNT A 208       1.226   8.335  39.060  6.00  0.00           C  
ATOM   3507  C   CNT A 208       2.217   8.264  36.470  0.00  0.00           C  
ATOM   3508  C   CNT A 208       2.371   7.132  37.310  0.00  0.00           C  
ATOM   3509  C   CNT A 208       1.829   7.132  38.600  7.00  0.00           C  
ATOM   3510  C   CNT A 208       1.993   6.034  39.380  6.00  0.00           C  
ATOM   3511  C   CNT A 208       3.152   6.074  36.800  2.00  0.00           C  
ATOM   3512  C   CNT A 208       3.610   5.145  37.750  0.00  0.00           C  
ATOM   3513  C   CNT A 208       3.024   5.167  39.020  5.00  0.00           C  
ATOM   3514  C   CNT A 208       3.581   4.446  40.120  7.00  0.00           C  
ATOM   3515  C   CNT A 208       4.746   4.413  37.520  7.00  0.00           C  
ATOM   3516  C   CNT A 208       5.417   3.847  38.640  7.00  0.00           C  
ATOM   3517  C   CNT A 208       4.822   3.883  39.930  4.00  0.00           C  
ATOM   3518  C   CNT A 208       5.598   3.469  41.000  9.00  0.00           C  
ATOM   3519  C   CNT A 208       6.686   3.331  38.420  5.00  0.00           C  
ATOM   3520  C   CNT A 208       7.544   3.124  39.530  2.00  0.00           C  
ATOM   3521  C   CNT A 208       6.978   3.222  40.820  8.00  0.00           C  
ATOM   3522  C   CNT A 208       7.874   3.130  41.900  8.00  0.00           C  
ATOM   3523  C   CNT A 208       8.931   3.289  39.350  8.00  0.00           C  
ATOM   3524  C   CNT A 208       9.755   3.510  40.460  2.00  0.00           C  
ATOM   3525  C   CNT A 208       9.245   3.360  41.770  6.00  0.00           C  
ATOM   3526  C   CNT A 208      10.099   3.619  42.830  5.00  0.00           C  
ATOM   3527  C   CNT A 208      11.071   3.811  40.260  6.00  0.00           C  
ATOM   3528  C   CNT A 208      11.766   4.275  41.360  0.00  0.00           C  
ATOM   3529  C   CNT A 208      11.371   4.133  42.660  2.00  0.00           C  
ATOM   3530  C   CNT A 208      11.916   5.019  43.600  8.00  0.00           C  
ATOM   3531  C   CNT A 208      12.944   5.004  41.100  3.00  0.00           C  
ATOM   3532  C   CNT A 208      13.478   5.875  42.030  6.00  0.00           C  
ATOM   3533  C   CNT A 208      12.959   5.899  43.320  0.00  0.00           C  
ATOM   3534  C   CNT A 208      13.341   6.857  44.260  9.00  0.00           C  
ATOM   3535  C   CNT A 208      14.461   6.847  41.720  3.00  0.00           C  
ATOM   3536  C   CNT A 208      14.797   7.880  42.620  3.00  0.00           C  
ATOM   3537  C   CNT A 208      14.216   7.908  43.850  2.00  0.00           C  
ATOM   3538  C   CNT A 208      14.479   8.977  44.750  9.00  0.00           C  
ATOM   3539  C   CNT A 208      15.617   8.978  42.250  3.00  0.00           C  
ATOM   3540  C   CNT A 208      15.578  10.161  42.980  8.00  0.00           C  
ATOM   3541  C   CNT A 208      14.931  10.205  44.200  7.00  0.00           C  
ATOM   3542  C   CNT A 208      14.892  11.409  44.850  4.00  0.00           C  
ATOM   3543  C   CNT A 208      15.910  11.330  42.270  6.00  0.00           C  
ATOM   3544  C   CNT A 208      15.556  12.570  42.880  3.00  0.00           C  
ATOM   3545  C   CNT A 208      15.064  12.600  44.180  6.00  0.00           C  
ATOM   3546  C   CNT A 208      14.582  13.757  44.710  5.00  0.00           C  
ATOM   3547  C   CNT A 208      15.578  13.740  42.110  2.00  0.00           C  
ATOM   3548  C   CNT A 208      14.894  14.887  42.520  9.00  0.00           C  
ATOM   3549  C   CNT A 208      14.333  14.920  43.860  8.00  0.00           C  
ATOM   3550  C   CNT A 208      13.419  15.920  44.240  4.00  0.00           C  
ATOM   3551  C   CNT A 208      14.583  15.928  41.610  8.00  0.00           C  
ATOM   3552  C   CNT A 208      13.509  16.754  41.920  5.00  0.00           C  
ATOM   3553  C   CNT A 208      12.949  16.768  43.270  5.00  0.00           C  
ATOM   3554  C   CNT A 208      11.787  17.522  43.510  8.00  0.00           C  
ATOM   3555  C   CNT A 208      12.850  17.467  40.910  8.00  0.00           C  
ATOM   3556  C   CNT A 208      11.558  17.895  41.100  4.00  0.00           C  
ATOM   3557  C   CNT A 208      11.110  18.102  42.430  1.00  0.00           C  
ATOM   3558  C   CNT A 208       9.766  18.435  42.570  9.00  0.00           C  
ATOM   3559  C   CNT A 208      10.779  18.340  39.980  7.00  0.00           C  
ATOM   3560  C   CNT A 208       9.392  18.490  40.200  8.00  0.00           C  
ATOM   3561  C   CNT A 208       8.867  18.554  41.500  5.00  0.00           C  
ATOM   3562  C   CNT A 208       7.496  18.618  41.700  4.00  0.00           C  
ATOM   3563  C   CNT A 208       8.611  18.675  39.060  3.00  0.00           C  
ATOM   3564  C   CNT A 208       7.195  18.644  39.270  8.00  0.00           C  
ATOM   3565  C   CNT A 208       6.652  18.586  40.560  1.00  0.00           C  
ATOM   3566  C   CNT A 208       5.241  18.344  40.720  1.00  0.00           C  
ATOM   3567  C   CNT A 208       6.353  18.316  38.200  1.00  0.00           C  
ATOM   3568  C   CNT A 208       5.137  17.694  38.410  0.00  0.00           C  
ATOM   3569  C   CNT A 208       4.519  17.838  39.630  7.00  0.00           C  
ATOM   3570  C   CNT A 208       3.390  17.042  39.960  2.00  0.00           C  
ATOM   3571  C   CNT A 208       4.461  16.997  37.350  6.00  0.00           C  
ATOM   3572  C   CNT A 208       3.289  16.293  37.640  0.00  0.00           C  
ATOM   3573  C   CNT A 208       2.734  16.322  38.940  5.00  0.00           C  
ATOM   3574  C   CNT A 208       1.777  15.346  39.270  0.00  0.00           C  
ATOM   3575  C   CNT A 208       1.252  15.267  40.540  8.00  0.00           C  
ATOM   3576  C   CNT A 208       0.413  14.228  40.970  7.00  0.00           C  
ATOM   3577  C   CNT A 208      -0.080  14.196  42.270  7.00  0.00           C  
ATOM   3578  C   CNT A 208      -0.774  13.072  42.760  4.00  0.00           C  
ATOM   3579  C   CNT A 208       0.291  13.102  40.160  5.00  0.00           C  
ATOM   3580  C   CNT A 208      -0.240  11.896  40.770  3.00  0.00           C  
ATOM   3581  C   CNT A 208      -0.899  11.898  42.020  9.00  0.00           C  
ATOM   3582  C   CNT A 208      -1.078  10.632  42.710  3.00  0.00           C  
ATOM   3583  C   CNT A 208       0.083  10.694  40.150  5.00  0.00           C  
ATOM   3584  C   CNT A 208       0.077   9.506  40.890  0.00  0.00           C  
ATOM   3585  C   CNT A 208      -0.551   9.465  42.110  0.00  0.00           C  
ATOM   3586  C   CNT A 208      -0.613   8.215  42.850  7.00  0.00           C  
ATOM   3587  C   CNT A 208       0.635   8.325  40.370  4.00  0.00           C  
ATOM   3588  C   CNT A 208       0.668   7.126  41.080  5.00  0.00           C  
ATOM   3589  C   CNT A 208       0.001   7.078  42.340  1.00  0.00           C  
ATOM   3590  C   CNT A 208       0.346   6.034  43.320  0.00  0.00           C  
ATOM   3591  C   CNT A 208       1.486   6.047  40.690  7.00  0.00           C  
ATOM   3592  C   CNT A 208       1.865   5.093  41.660  1.00  0.00           C  
ATOM   3593  C   CNT A 208       1.328   5.030  42.950  8.00  0.00           C  
ATOM   3594  C   CNT A 208       2.075   4.445  44.010  3.00  0.00           C  
ATOM   3595  C   CNT A 208       3.045   4.422  41.410  9.00  0.00           C  
ATOM   3596  C   CNT A 208       3.803   3.872  42.480  6.00  0.00           C  
ATOM   3597  C   CNT A 208       3.357   3.984  43.790  7.00  0.00           C  
ATOM   3598  C   CNT A 208       4.123   3.480  44.870  5.00  0.00           C  
ATOM   3599  C   CNT A 208       5.103   3.394  42.310  3.00  0.00           C  
ATOM   3600  C   CNT A 208       5.988   3.141  43.370  9.00  0.00           C  
ATOM   3601  C   CNT A 208       5.464   3.215  44.660  0.00  0.00           C  
ATOM   3602  C   CNT A 208       6.286   3.108  45.770  9.00  0.00           C  
ATOM   3603  C   CNT A 208       7.362   3.155  43.200  9.00  0.00           C  
ATOM   3604  C   CNT A 208       8.226   3.360  44.330  0.00  0.00           C  
ATOM   3605  C   CNT A 208       7.673   3.232  45.590  2.00  0.00           C  
ATOM   3606  C   CNT A 208       8.375   3.751  46.680  6.00  0.00           C  
ATOM   3607  C   CNT A 208       9.616   3.607  44.180  2.00  0.00           C  
ATOM   3608  C   CNT A 208      10.258   4.304  45.210  7.00  0.00           C  
ATOM   3609  C   CNT A 208       9.642   4.271  46.460  7.00  0.00           C  
ATOM   3610  C   CNT A 208      10.306   4.956  47.520  8.00  0.00           C  
ATOM   3611  C   CNT A 208      11.433   4.998  44.940  6.00  0.00           C  
ATOM   3612  C   CNT A 208      11.877   5.898  45.920  5.00  0.00           C  
ATOM   3613  C   CNT A 208      11.335   5.853  47.150  2.00  0.00           C  
ATOM   3614  C   CNT A 208      11.658   6.871  47.980  4.00  0.00           C  
ATOM   3615  C   CNT A 208      12.910   6.779  45.570  0.00  0.00           C  
ATOM   3616  C   CNT A 208      13.160   7.895  46.390  6.00  0.00           C  
ATOM   3617  C   CNT A 208      12.575   7.898  47.660  4.00  0.00           C  
ATOM   3618  C   CNT A 208      12.742   8.985  48.490  9.00  0.00           C  
ATOM   3619  C   CNT A 208      13.893   8.999  45.980  5.00  0.00           C  
ATOM   3620  C   CNT A 208      13.896  10.190  46.740  2.00  0.00           C  
ATOM   3621  C   CNT A 208      13.301  10.167  47.960  8.00  0.00           C  
ATOM   3622  C   CNT A 208      13.234  11.384  48.720  4.00  0.00           C  
ATOM   3623  C   CNT A 208      14.330  11.396  46.150  9.00  0.00           C  
ATOM   3624  C   CNT A 208      14.089  12.626  46.810  6.00  0.00           C  
ATOM   3625  C   CNT A 208      13.493  12.623  48.110  2.00  0.00           C  
ATOM   3626  C   CNT A 208      12.788  13.806  48.520  2.00  0.00           C  
ATOM   3627  C   CNT A 208      14.056  13.822  46.040  9.00  0.00           C  
ATOM   3628  C   CNT A 208      13.208  14.917  46.440  8.00  0.00           C  
ATOM   3629  C   CNT A 208      12.676  14.940  47.730  0.00  0.00           C  
ATOM   3630  C   CNT A 208      11.772  15.931  48.060  1.00  0.00           C  
ATOM   3631  C   CNT A 208      12.835  15.865  45.490  1.00  0.00           C  
ATOM   3632  C   CNT A 208      11.850  16.802  45.830  4.00  0.00           C  
ATOM   3633  C   CNT A 208      11.300  16.834  47.120  1.00  0.00           C  
ATOM   3634  C   CNT A 208      10.164  17.628  47.340  7.00  0.00           C  
ATOM   3635  C   CNT A 208      11.280  17.587  44.820  2.00  0.00           C  
ATOM   3636  C   CNT A 208       9.990  18.082  44.960  0.00  0.00           C  
ATOM   3637  C   CNT A 208       9.483  18.168  46.250  1.00  0.00           C  
ATOM   3638  C   CNT A 208       8.148  18.518  46.440  5.00  0.00           C  
ATOM   3639  C   CNT A 208       9.201  18.378  43.880  0.00  0.00           C  
ATOM   3640  C   CNT A 208       7.856  18.626  44.050  2.00  0.00           C  
ATOM   3641  C   CNT A 208       7.268  18.562  45.350  2.00  0.00           C  
ATOM   3642  C   CNT A 208       5.885  18.521  45.520  3.00  0.00           C  
ATOM   3643  C   CNT A 208       6.914  18.690  42.990  3.00  0.00           C  
ATOM   3644  C   CNT A 208       5.523  18.438  43.140  3.00  0.00           C  
ATOM   3645  C   CNT A 208       5.022  18.436  44.470  8.00  0.00           C  
ATOM   3646  C   CNT A 208       3.631  18.139  44.630  7.00  0.00           C  
ATOM   3647  C   CNT A 208       4.747  18.203  42.000  0.00  0.00           C  
ATOM   3648  C   CNT A 208       3.479  17.717  42.230  7.00  0.00           C  
ATOM   3649  C   CNT A 208       2.865  17.763  43.540  6.00  0.00           C  
ATOM   3650  C   CNT A 208       1.615  17.169  43.730  0.00  0.00           C  
ATOM   3651  C   CNT A 208       2.768  17.046  41.210  3.00  0.00           C  
ATOM   3652  C   CNT A 208       1.661  16.237  41.490  2.00  0.00           C  
ATOM   3653  C   CNT A 208       1.043  16.330  42.750  4.00  0.00           C  
ATOM   3654  C   CNT A 208       0.213  15.276  43.120  6.00  0.00           C  
ATOM   3655  C   CNT A 208      -0.265  15.265  44.450  3.00  0.00           C  
ATOM   3656  C   CNT A 208      -1.010  14.180  44.950  8.00  0.00           C  
ATOM   3657  C   CNT A 208      -1.556  14.158  46.220  3.00  0.00           C  
ATOM   3658  C   CNT A 208      -2.154  13.004  46.740  3.00  0.00           C  
ATOM   3659  C   CNT A 208      -1.200  13.040  44.090  7.00  0.00           C  
ATOM   3660  C   CNT A 208      -1.726  11.826  44.700  0.00  0.00           C  
ATOM   3661  C   CNT A 208      -2.027  11.835  46.050  1.00  0.00           C  
ATOM   3662  C   CNT A 208      -2.339  10.645  46.640  3.00  0.00           C  
ATOM   3663  C   CNT A 208      -1.413  10.662  44.050  1.00  0.00           C  
ATOM   3664  C   CNT A 208      -1.557   9.436  44.690  4.00  0.00           C  
ATOM   3665  C   CNT A 208      -2.023   9.409  46.040  0.00  0.00           C  
ATOM   3666  C   CNT A 208      -2.199   8.208  46.740  7.00  0.00           C  
ATOM   3667  C   CNT A 208      -1.150   8.202  44.160  1.00  0.00           C  
ATOM   3668  C   CNT A 208      -1.151   7.036  44.930  2.00  0.00           C  
ATOM   3669  C   CNT A 208      -1.619   7.045  46.210  8.00  0.00           C  
ATOM   3670  C   CNT A 208      -1.224   6.099  47.170  3.00  0.00           C  
ATOM   3671  C   CNT A 208      -0.199   6.055  44.590  3.00  0.00           C  
ATOM   3672  C   CNT A 208       0.348   5.257  45.570  9.00  0.00           C  
ATOM   3673  C   CNT A 208      -0.221   5.159  46.860  2.00  0.00           C  
ATOM   3674  C   CNT A 208       0.367   4.416  47.910  9.00  0.00           C  
ATOM   3675  C   CNT A 208       1.542   4.587  45.340  2.00  0.00           C  
ATOM   3676  C   CNT A 208       2.239   4.014  46.410  9.00  0.00           C  
ATOM   3677  C   CNT A 208       1.643   3.909  47.690  8.00  0.00           C  
ATOM   3678  C   CNT A 208       2.370   3.376  48.770  7.00  0.00           C  
ATOM   3679  C   CNT A 208       3.518   3.465  46.150  9.00  0.00           C  
ATOM   3680  C   CNT A 208       4.258   3.084  47.220  8.00  0.00           C  
ATOM   3681  C   CNT A 208       3.725   3.058  48.500  6.00  0.00           C  
ATOM   3682  C   CNT A 208       4.645   2.998  49.630  0.00  0.00           C  
ATOM   3683  C   CNT A 208       5.686   3.161  47.060  8.00  0.00           C  
ATOM   3684  C   CNT A 208       6.498   3.310  48.140  9.00  0.00           C  
ATOM   3685  C   CNT A 208       5.932   3.339  49.480  3.00  0.00           C  
ATOM   3686  C   CNT A 208       6.689   3.740  50.590  9.00  0.00           C  
ATOM   3687  C   CNT A 208       7.804   3.800  47.930  9.00  0.00           C  
ATOM   3688  C   CNT A 208       8.526   4.237  49.010  2.00  0.00           C  
ATOM   3689  C   CNT A 208       8.034   4.218  50.330  7.00  0.00           C  
ATOM   3690  C   CNT A 208       8.671   4.919  51.350  1.00  0.00           C  
ATOM   3691  C   CNT A 208       9.630   5.141  48.740  3.00  0.00           C  
ATOM   3692  C   CNT A 208      10.129   5.987  49.700  2.00  0.00           C  
ATOM   3693  C   CNT A 208       9.613   5.920  51.010  4.00  0.00           C  
ATOM   3694  C   CNT A 208       9.887   6.975  51.880  7.00  0.00           C  
ATOM   3695  C   CNT A 208      11.084   6.945  49.310  6.00  0.00           C  
ATOM   3696  C   CNT A 208      11.399   7.935  50.240  9.00  0.00           C  
ATOM   3697  C   CNT A 208      10.773   7.967  51.500  8.00  0.00           C  
ATOM   3698  C   CNT A 208      10.915   9.107  52.300  2.00  0.00           C  
ATOM   3699  C   CNT A 208      12.234   9.043  49.800  8.00  0.00           C  
ATOM   3700  C   CNT A 208      12.111  10.248  50.560  4.00  0.00           C  
ATOM   3701  C   CNT A 208      11.419  10.286  51.770  3.00  0.00           C  
ATOM   3702  C   CNT A 208      11.354  11.463  52.510  6.00  0.00           C  
ATOM   3703  C   CNT A 208      12.598  11.410  50.020  6.00  0.00           C  
ATOM   3704  C   CNT A 208      12.293  12.688  50.610  8.00  0.00           C  
ATOM   3705  C   CNT A 208      11.735  12.638  51.890  8.00  0.00           C  
ATOM   3706  C   CNT A 208      11.238  13.874  52.470  3.00  0.00           C  
ATOM   3707  C   CNT A 208      12.287  13.840  49.810  2.00  0.00           C  
ATOM   3708  C   CNT A 208      11.569  14.964  50.270  5.00  0.00           C  
ATOM   3709  C   CNT A 208      10.977  14.926  51.550  6.00  0.00           C  
ATOM   3710  C   CNT A 208      10.027  15.898  51.830  3.00  0.00           C  
ATOM   3711  C   CNT A 208      11.172  15.944  49.340  4.00  0.00           C  
ATOM   3712  C   CNT A 208      10.059  16.743  49.610  4.00  0.00           C  
ATOM   3713  C   CNT A 208       9.513  16.773  50.850  0.00  0.00           C  
ATOM   3714  C   CNT A 208       8.435  17.597  51.140  5.00  0.00           C  
ATOM   3715  C   CNT A 208       9.547  17.566  48.600  3.00  0.00           C  
ATOM   3716  C   CNT A 208       8.328  18.269  48.810  5.00  0.00           C  
ATOM   3717  C   CNT A 208       7.784  18.281  50.080  5.00  0.00           C  
ATOM   3718  C   CNT A 208       6.458  18.633  50.300  1.00  0.00           C  
ATOM   3719  C   CNT A 208       7.582  18.677  47.700  7.00  0.00           C  
ATOM   3720  C   CNT A 208       6.187  18.749  47.880  8.00  0.00           C  
ATOM   3721  C   CNT A 208       5.674  18.969  49.150  7.00  0.00           C  
ATOM   3722  C   CNT A 208       4.211  19.044  49.310  1.00  0.00           C  
ATOM   3723  C   CNT A 208       5.304  18.687  46.790  6.00  0.00           C  
ATOM   3724  C   CNT A 208       3.959  18.562  46.940  3.00  0.00           C  
ATOM   3725  C   CNT A 208       3.402  18.671  48.180  1.00  0.00           C  
ATOM   3726  C   CNT A 208       2.033  18.346  48.420  0.00  0.00           C  
ATOM   3727  C   CNT A 208       3.087  18.249  45.890  1.00  0.00           C  
ATOM   3728  C   CNT A 208       1.698  17.947  46.070  3.00  0.00           C  
ATOM   3729  C   CNT A 208       1.258  17.862  47.340  8.00  0.00           C  
ATOM   3730  C   CNT A 208       0.114  17.082  47.640  3.00  0.00           C  
ATOM   3731  C   CNT A 208       1.067  17.210  45.050  2.00  0.00           C  
ATOM   3732  C   CNT A 208       0.098  16.242  45.400  1.00  0.00           C  
ATOM   3733  C   CNT A 208      -0.431  16.288  46.670  5.00  0.00           C  
ATOM   3734  C   CNT A 208      -1.358  15.256  47.030  7.00  0.00           C  
ATOM   3735  C   CNT A 208      -1.846  15.273  48.340  3.00  0.00           C  
ATOM   3736  C   CNT A 208      -2.572  14.208  48.800  5.00  0.00           C  
ATOM   3737  C   CNT A 208      -3.137  14.225  50.060  6.00  0.00           C  
ATOM   3738  C   CNT A 208      -3.752  13.073  50.570  2.00  0.00           C  
ATOM   3739  C   CNT A 208      -2.608  13.054  48.070  6.00  0.00           C  
ATOM   3740  C   CNT A 208      -3.132  11.854  48.580  0.00  0.00           C  
ATOM   3741  C   CNT A 208      -3.643  11.885  49.870  6.00  0.00           C  
ATOM   3742  C   CNT A 208      -4.080  10.657  50.520  1.00  0.00           C  
ATOM   3743  C   CNT A 208      -2.836  10.651  47.950  0.00  0.00           C  
ATOM   3744  C   CNT A 208      -3.126   9.488  48.640  0.00  0.00           C  
ATOM   3745  C   CNT A 208      -3.731   9.461  49.910  0.00  0.00           C  
ATOM   3746  C   CNT A 208      -3.798   8.239  50.600  2.00  0.00           C  
ATOM   3747  C   CNT A 208      -2.536   8.287  48.150  3.00  0.00           C  
ATOM   3748  C   CNT A 208      -2.507   7.139  48.850  7.00  0.00           C  
ATOM   3749  C   CNT A 208      -3.040   7.186  50.170  5.00  0.00           C  
ATOM   3750  C   CNT A 208      -2.770   6.164  51.110  6.00  0.00           C  
ATOM   3751  C   CNT A 208      -1.650   6.081  48.490  9.00  0.00           C  
ATOM   3752  C   CNT A 208      -1.331   5.111  49.490  0.00  0.00           C  
ATOM   3753  C   CNT A 208      -1.922   5.082  50.760  2.00  0.00           C  
ATOM   3754  C   CNT A 208      -1.202   4.464  51.810  7.00  0.00           C  
ATOM   3755  C   CNT A 208      -0.187   4.340  49.190  6.00  0.00           C  
ATOM   3756  C   CNT A 208       0.468   3.726  50.250  8.00  0.00           C  
ATOM   3757  C   CNT A 208      -0.005   3.746  51.550  0.00  0.00           C  
ATOM   3758  C   CNT A 208       0.811   3.319  52.590  9.00  0.00           C  
ATOM   3759  C   CNT A 208       1.806   3.301  50.040  1.00  0.00           C  
ATOM   3760  C   CNT A 208       2.688   3.120  51.090  5.00  0.00           C  
ATOM   3761  C   CNT A 208       2.152   3.216  52.380  1.00  0.00           C  
ATOM   3762  C   CNT A 208       3.012   3.199  53.500  3.00  0.00           C  
ATOM   3763  C   CNT A 208       4.110   2.961  50.960  1.00  0.00           C  
ATOM   3764  C   CNT A 208       4.930   3.240  52.090  9.00  0.00           C  
ATOM   3765  C   CNT A 208       4.380   3.168  53.380  0.00  0.00           C  
ATOM   3766  C   CNT A 208       5.086   3.610  54.460  4.00  0.00           C  
ATOM   3767  C   CNT A 208       6.225   3.616  51.890  7.00  0.00           C  
ATOM   3768  C   CNT A 208       6.944   4.163  52.980  5.00  0.00           C  
ATOM   3769  C   CNT A 208       6.406   4.146  54.300  2.00  0.00           C  
ATOM   3770  C   CNT A 208       6.980   5.013  55.240  6.00  0.00           C  
ATOM   3771  C   CNT A 208       8.079   4.906  52.620  7.00  0.00           C  
ATOM   3772  C   CNT A 208       8.560   5.856  53.620  1.00  0.00           C  
ATOM   3773  C   CNT A 208       8.120   5.844  54.930  1.00  0.00           C  
ATOM   3774  C   CNT A 208       8.399   6.924  55.830  4.00  0.00           C  
ATOM   3775  C   CNT A 208       9.430   6.847  53.220  8.00  0.00           C  
ATOM   3776  C   CNT A 208       9.734   7.885  54.120  7.00  0.00           C  
ATOM   3777  C   CNT A 208       9.211   7.987  55.410  6.00  0.00           C  
ATOM   3778  C   CNT A 208       9.289   9.152  56.150  1.00  0.00           C  
ATOM   3779  C   CNT A 208      10.507   9.039  53.620  3.00  0.00           C  
ATOM   3780  C   CNT A 208      10.411  10.278  54.360  4.00  0.00           C  
ATOM   3781  C   CNT A 208       9.887  10.265  55.660  2.00  0.00           C  
ATOM   3782  C   CNT A 208       9.760  11.492  56.350  3.00  0.00           C  
ATOM   3783  C   CNT A 208      10.970  11.434  53.880  5.00  0.00           C  
ATOM   3784  C   CNT A 208      10.606  12.669  54.450  6.00  0.00           C  
ATOM   3785  C   CNT A 208      10.004  12.731  55.720  6.00  0.00           C  
ATOM   3786  C   CNT A 208       9.345  13.863  56.180  6.00  0.00           C  
ATOM   3787  C   CNT A 208      10.570  13.843  53.700  7.00  0.00           C  
ATOM   3788  C   CNT A 208       9.826  14.962  54.060  0.00  0.00           C  
ATOM   3789  C   CNT A 208       9.140  14.951  55.320  9.00  0.00           C  
ATOM   3790  C   CNT A 208       8.370  16.062  55.750  7.00  0.00           C  
ATOM   3791  C   CNT A 208       9.498  16.000  53.110  9.00  0.00           C  
ATOM   3792  C   CNT A 208       8.475  16.938  53.480  3.00  0.00           C  
ATOM   3793  C   CNT A 208       7.895  16.924  54.740  3.00  0.00           C  
ATOM   3794  C   CNT A 208       6.742  17.697  54.960  3.00  0.00           C  
ATOM   3795  C   CNT A 208       7.864  17.602  52.430  3.00  0.00           C  
ATOM   3796  C   CNT A 208       6.631  18.270  52.630  2.00  0.00           C  
ATOM   3797  C   CNT A 208       6.061  18.302  53.920  8.00  0.00           C  
ATOM   3798  C   CNT A 208       4.775  18.866  54.110  5.00  0.00           C  
ATOM   3799  C   CNT A 208       5.859  18.735  51.530  1.00  0.00           C  
ATOM   3800  C   CNT A 208       4.549  19.149  51.700  7.00  0.00           C  
ATOM   3801  C   CNT A 208       3.967  19.123  52.990  7.00  0.00           C  
ATOM   3802  C   CNT A 208       2.586  19.209  53.200  9.00  0.00           C  
ATOM   3803  C   CNT A 208       3.647  19.145  50.590  5.00  0.00           C  
ATOM   3804  C   CNT A 208       2.328  18.874  50.820  0.00  0.00           C  
ATOM   3805  C   CNT A 208       1.737  19.014  52.130  2.00  0.00           C  
ATOM   3806  C   CNT A 208       0.483  18.436  52.330  0.00  0.00           C  
ATOM   3807  C   CNT A 208       1.524  18.455  49.690  3.00  0.00           C  
ATOM   3808  C   CNT A 208       0.220  17.962  49.930  6.00  0.00           C  
ATOM   3809  C   CNT A 208      -0.189  17.826  51.270  6.00  0.00           C  
ATOM   3810  C   CNT A 208      -1.302  17.050  51.540  7.00  0.00           C  
ATOM   3811  C   CNT A 208      -0.380  17.125  48.950  1.00  0.00           C  
ATOM   3812  C   CNT A 208      -1.465  16.307  49.250  0.00  0.00           C  
ATOM   3813  C   CNT A 208      -1.899  16.190  50.580  0.00  0.00           C  
ATOM   3814  C   CNT A 208      -2.883  15.233  50.970  4.00  0.00           C  
ATOM   3815  C   CNT A 208      -3.303  15.217  52.310  7.00  0.00           C  
ATOM   3816  C   CNT A 208      -4.060  14.091  52.700  2.00  0.00           C  
ATOM   3817  C   CNT A 208      -4.601  14.170  54.000  6.00  0.00           C  
ATOM   3818  C   CNT A 208      -5.369  13.071  54.470  8.00  0.00           C  
ATOM   3819  C   CNT A 208      -4.425  13.071  51.820  7.00  0.00           C  
ATOM   3820  C   CNT A 208      -4.990  11.927  52.410  2.00  0.00           C  
ATOM   3821  C   CNT A 208      -5.472  11.866  53.700  0.00  0.00           C  
ATOM   3822  C   CNT A 208      -5.867  10.668  54.300  4.00  0.00           C  
ATOM   3823  C   CNT A 208      -4.741  10.735  51.750  0.00  0.00           C  
ATOM   3824  C   CNT A 208      -4.961   9.471  52.370  4.00  0.00           C  
ATOM   3825  C   CNT A 208      -5.543   9.452  53.650  3.00  0.00           C  
ATOM   3826  C   CNT A 208      -5.627   8.276  54.390  4.00  0.00           C  
ATOM   3827  C   CNT A 208      -4.422   8.308  51.840  8.00  0.00           C  
ATOM   3828  C   CNT A 208      -4.294   7.196  52.690  3.00  0.00           C  
ATOM   3829  C   CNT A 208      -4.927   7.154  53.960  2.00  0.00           C  
ATOM   3830  C   CNT A 208      -4.602   6.100  54.850  5.00  0.00           C  
ATOM   3831  C   CNT A 208      -3.392   6.186  52.370  3.00  0.00           C  
ATOM   3832  C   CNT A 208      -2.915   5.261  53.290  9.00  0.00           C  
ATOM   3833  C   CNT A 208      -3.622   5.101  54.510  2.00  0.00           C  
ATOM   3834  C   CNT A 208      -2.952   4.405  55.540  1.00  0.00           C  
ATOM   3835  C   CNT A 208      -1.737   4.557  53.120  3.00  0.00           C  
ATOM   3836  C   CNT A 208      -1.078   3.882  54.140  3.00  0.00           C  
ATOM   3837  C   CNT A 208      -1.644   3.920  55.390  5.00  0.00           C  
ATOM   3838  C   CNT A 208      -0.910   3.459  56.460  8.00  0.00           C  
ATOM   3839  C   CNT A 208       0.182   3.267  53.900  7.00  0.00           C  
ATOM   3840  C   CNT A 208       1.009   3.144  55.000  1.00  0.00           C  
ATOM   3841  C   CNT A 208       0.441   3.203  56.250  0.00  0.00           C  
ATOM   3842  C   CNT A 208       1.266   3.263  57.420  0.00  0.00           C  
ATOM   3843  C   CNT A 208       2.381   3.201  54.760  5.00  0.00           C  
ATOM   3844  C   CNT A 208       3.209   3.347  55.920  2.00  0.00           C  
ATOM   3845  C   CNT A 208       2.629   3.375  57.240  6.00  0.00           C  
ATOM   3846  C   CNT A 208       3.440   3.701  58.340  9.00  0.00           C  
ATOM   3847  C   CNT A 208       4.506   3.729  55.710  3.00  0.00           C  
ATOM   3848  C   CNT A 208       5.180   4.354  56.760  1.00  0.00           C  
ATOM   3849  C   CNT A 208       4.653   4.322  58.040  0.00  0.00           C  
ATOM   3850  C   CNT A 208       5.165   5.159  59.040  6.00  0.00           C  
ATOM   3851  C   CNT A 208       6.421   5.013  56.530  2.00  0.00           C  
ATOM   3852  C   CNT A 208       6.909   5.949  57.460  9.00  0.00           C  
ATOM   3853  C   CNT A 208       6.285   6.023  58.720  5.00  0.00           C  
ATOM   3854  C   CNT A 208       6.743   6.897  59.670  3.00  0.00           C  
ATOM   3855  C   CNT A 208       7.871   6.885  57.130  0.00  0.00           C  
ATOM   3856  C   CNT A 208       8.022   8.052  57.920  1.00  0.00           C  
ATOM   3857  C   CNT A 208       7.403   8.057  59.180  6.00  0.00           C  
ATOM   3858  C   CNT A 208       7.573   9.244  60.000  9.00  0.00           C  
ATOM   3859  C   CNT A 208       8.662   9.150  57.410  0.00  0.00           C  
ATOM   3860  C   CNT A 208       8.598  10.328  58.170  6.00  0.00           C  
ATOM   3861  C   CNT A 208       8.087  10.392  59.460  1.00  0.00           C  
ATOM   3862  C   CNT A 208       8.072  11.557  60.190  1.00  0.00           C  
ATOM   3863  C   CNT A 208       9.230  11.533  57.660  5.00  0.00           C  
ATOM   3864  C   CNT A 208       8.763  12.752  58.200  1.00  0.00           C  
ATOM   3865  C   CNT A 208       8.164  12.762  59.440  5.00  0.00           C  
ATOM   3866  C   CNT A 208       7.579  13.872  59.980  6.00  0.00           C  
ATOM   3867  C   CNT A 208       8.894  13.917  57.510  8.00  0.00           C  
ATOM   3868  C   CNT A 208       8.016  14.990  57.880  9.00  0.00           C  
ATOM   3869  C   CNT A 208       7.488  14.982  59.130  6.00  0.00           C  
ATOM   3870  C   CNT A 208       6.617  15.938  59.570  2.00  0.00           C  
ATOM   3871  C   CNT A 208       7.729  15.989  56.980  1.00  0.00           C  
ATOM   3872  C   CNT A 208       6.648  16.828  57.240  7.00  0.00           C  
ATOM   3873  C   CNT A 208       6.122  16.870  58.560  9.00  0.00           C  
ATOM   3874  C   CNT A 208       4.983  17.620  58.810  1.00  0.00           C  
ATOM   3875  C   CNT A 208       6.098  17.669  56.250  5.00  0.00           C  
ATOM   3876  C   CNT A 208       4.943  18.370  56.490  8.00  0.00           C  
ATOM   3877  C   CNT A 208       4.349  18.300  57.770  8.00  0.00           C  
ATOM   3878  C   CNT A 208       3.093  18.835  57.980  4.00  0.00           C  
ATOM   3879  C   CNT A 208       4.246  18.882  55.440  7.00  0.00           C  
ATOM   3880  C   CNT A 208       2.879  19.235  55.600  2.00  0.00           C  
ATOM   3881  C   CNT A 208       2.295  19.271  56.890  8.00  0.00           C  
ATOM   3882  C   CNT A 208       0.894  19.275  57.050  4.00  0.00           C  
ATOM   3883  C   CNT A 208       2.045  19.148  54.530  5.00  0.00           C  
ATOM   3884  C   CNT A 208       0.674  19.021  54.670  7.00  0.00           C  
ATOM   3885  C   CNT A 208       0.078  19.008  55.950  4.00  0.00           C  
ATOM   3886  C   CNT A 208      -1.239  18.637  56.220  3.00  0.00           C  
ATOM   3887  C   CNT A 208      -0.086  18.467  53.600  0.00  0.00           C  
ATOM   3888  C   CNT A 208      -1.377  17.961  53.840  9.00  0.00           C  
ATOM   3889  C   CNT A 208      -1.964  18.017  55.120  7.00  0.00           C  
ATOM   3890  C   CNT A 208      -3.022  17.168  55.470  4.00  0.00           C  
ATOM   3891  C   CNT A 208      -1.893  17.095  52.850  0.00  0.00           C  
ATOM   3892  C   CNT A 208      -2.967  16.251  53.190  5.00  0.00           C  
ATOM   3893  C   CNT A 208      -3.394  16.197  54.520  1.00  0.00           C  
ATOM   3894  C   CNT A 208      -4.395  15.272  54.840  6.00  0.00           C  
ATOM   3895  C   CNT A 208      -4.967  15.337  56.140  4.00  0.00           C  
ATOM   3896  C   CNT A 208      -5.646  14.219  56.640  9.00  0.00           C  
ATOM   3897  C   CNT A 208      -6.150  14.182  57.930  4.00  0.00           C  
ATOM   3898  C   CNT A 208      -6.765  13.035  58.400  3.00  0.00           C  
ATOM   3899  C   CNT A 208      -5.778  13.071  55.820  4.00  0.00           C  
ATOM   3900  C   CNT A 208      -6.427  11.916  56.330  9.00  0.00           C  
ATOM   3901  C   CNT A 208      -6.863  11.882  57.650  4.00  0.00           C  
ATOM   3902  C   CNT A 208      -7.251  10.660  58.220  5.00  0.00           C  
ATOM   3903  C   CNT A 208      -6.321  10.705  55.630  3.00  0.00           C  
ATOM   3904  C   CNT A 208      -6.504   9.498  56.300  1.00  0.00           C  
ATOM   3905  C   CNT A 208      -7.031   9.445  57.550  3.00  0.00           C  
ATOM   3906  C   CNT A 208      -7.139   8.267  58.300  0.00  0.00           C  
ATOM   3907  C   CNT A 208      -6.060   8.274  55.730  8.00  0.00           C  
ATOM   3908  C   CNT A 208      -5.928   7.160  56.560  7.00  0.00           C  
ATOM   3909  C   CNT A 208      -6.356   7.166  57.890  2.00  0.00           C  
ATOM   3910  C   CNT A 208      -6.018   6.225  58.830  0.00  0.00           C  
ATOM   3911  C   CNT A 208      -5.219   6.074  56.140  0.00  0.00           C  
ATOM   3912  C   CNT A 208      -4.711   5.176  57.100  2.00  0.00           C  
ATOM   3913  C   CNT A 208      -5.174   5.205  58.400  6.00  0.00           C  
ATOM   3914  C   CNT A 208      -4.587   4.484  59.460  4.00  0.00           C  
ATOM   3915  C   CNT A 208      -3.521   4.438  56.840  7.00  0.00           C  
ATOM   3916  C   CNT A 208      -2.802   3.898  57.890  3.00  0.00           C  
ATOM   3917  C   CNT A 208      -3.373   3.889  59.180  1.00  0.00           C  
ATOM   3918  C   CNT A 208      -2.649   3.486  60.280  8.00  0.00           C  
ATOM   3919  C   CNT A 208      -1.435   3.485  57.720  8.00  0.00           C  
ATOM   3920  C   CNT A 208      -0.673   3.169  58.840  1.00  0.00           C  
ATOM   3921  C   CNT A 208      -1.273   3.160  60.170  5.00  0.00           C  
ATOM   3922  C   CNT A 208      -0.390   3.125  61.250  1.00  0.00           C  
ATOM   3923  C   CNT A 208       0.690   3.198  58.710  4.00  0.00           C  
ATOM   3924  C   CNT A 208       1.559   3.310  59.770  7.00  0.00           C  
ATOM   3925  C   CNT A 208       1.036   3.293  61.060  3.00  0.00           C  
ATOM   3926  C   CNT A 208       1.720   3.886  62.120  2.00  0.00           C  
ATOM   3927  C   CNT A 208       2.873   3.703  59.600  3.00  0.00           C  
ATOM   3928  C   CNT A 208       3.518   4.340  60.630  3.00  0.00           C  
ATOM   3929  C   CNT A 208       2.973   4.405  61.930  0.00  0.00           C  
ATOM   3930  C   CNT A 208       3.670   5.079  62.940  9.00  0.00           C  
ATOM   3931  C   CNT A 208       4.645   5.131  60.340  2.00  0.00           C  
ATOM   3932  C   CNT A 208       5.290   5.893  61.300  9.00  0.00           C  
ATOM   3933  C   CNT A 208       4.681   5.909  62.620  9.00  0.00           C  
ATOM   3934  C   CNT A 208       5.053   6.851  63.540  1.00  0.00           C  
ATOM   3935  C   CNT A 208       6.201   6.888  60.970  6.00  0.00           C  
ATOM   3936  C   CNT A 208       6.405   7.993  61.770  0.00  0.00           C  
ATOM   3937  C   CNT A 208       5.837   7.929  63.050  2.00  0.00           C  
ATOM   3938  C   CNT A 208       5.905   9.119  63.850  6.00  0.00           C  
ATOM   3939  C   CNT A 208       7.017   9.155  61.290  3.00  0.00           C  
ATOM   3940  C   CNT A 208       7.092  10.290  62.090  7.00  0.00           C  
ATOM   3941  C   CNT A 208       6.546  10.295  63.390  6.00  0.00           C  
ATOM   3942  C   CNT A 208       6.420  11.508  64.070  7.00  0.00           C  
ATOM   3943  C   CNT A 208       7.495  11.518  61.480  8.00  0.00           C  
ATOM   3944  C   CNT A 208       7.078  12.707  62.090  3.00  0.00           C  
ATOM   3945  C   CNT A 208       6.603  12.754  63.390  7.00  0.00           C  
ATOM   3946  C   CNT A 208       5.954  13.907  63.870  2.00  0.00           C  
ATOM   3947  C   CNT A 208       7.060  13.830  61.260  9.00  0.00           C  
ATOM   3948  C   CNT A 208       6.430  14.949  61.710  2.00  0.00           C  
ATOM   3949  C   CNT A 208       5.854  14.999  63.010  6.00  0.00           C  
ATOM   3950  C   CNT A 208       4.937  16.046  63.360  8.00  0.00           C  
ATOM   3951  C   CNT A 208       6.023  15.947  60.780  6.00  0.00           C  
ATOM   3952  C   CNT A 208       4.940  16.763  61.120  7.00  0.00           C  
ATOM   3953  C   CNT A 208       4.500  16.911  62.400  9.00  0.00           C  
ATOM   3954  C   CNT A 208       3.454  17.789  62.700  2.00  0.00           C  
ATOM   3955  C   CNT A 208       4.444  17.605  60.120  8.00  0.00           C  
ATOM   3956  C   CNT A 208       3.242  18.371  60.390  1.00  0.00           C  
ATOM   3957  C   CNT A 208       2.738  18.412  61.670  8.00  0.00           C  
ATOM   3958  C   CNT A 208       1.417  18.768  61.900  4.00  0.00           C  
ATOM   3959  C   CNT A 208       2.503  18.807  59.290  3.00  0.00           C  
ATOM   3960  C   CNT A 208       1.147  19.157  59.470  1.00  0.00           C  
ATOM   3961  C   CNT A 208       0.607  19.164  60.790  1.00  0.00           C  
ATOM   3962  C   CNT A 208      -0.779  19.300  60.960  7.00  0.00           C  
ATOM   3963  C   CNT A 208       0.286  19.263  58.380  2.00  0.00           C  
ATOM   3964  C   CNT A 208      -1.066  19.104  58.570  3.00  0.00           C  
ATOM   3965  C   CNT A 208      -1.603  19.165  59.880  6.00  0.00           C  
ATOM   3966  C   CNT A 208      -2.925  18.732  60.040  2.00  0.00           C  
ATOM   3967  C   CNT A 208      -1.837  18.744  57.460  7.00  0.00           C  
ATOM   3968  C   CNT A 208      -3.051  18.041  57.740  6.00  0.00           C  
ATOM   3969  C   CNT A 208      -3.515  17.918  59.060  1.00  0.00           C  
ATOM   3970  C   CNT A 208      -4.712  17.284  59.280  5.00  0.00           C  
ATOM   3971  C   CNT A 208      -3.549  17.175  56.730  2.00  0.00           C  
ATOM   3972  C   CNT A 208      -4.668  16.394  56.990  6.00  0.00           C  
ATOM   3973  C   CNT A 208      -5.146  16.306  58.330  8.00  0.00           C  
ATOM   3974  C   CNT A 208      -6.077  15.325  58.690  1.00  0.00           C  
ATOM   3975  C   CNT A 208      -6.645  15.369  59.960  5.00  0.00           C  
ATOM   3976  C   CNT A 208      -7.395  14.286  60.430  6.00  0.00           C  
ATOM   3977  C   CNT A 208      -7.913  14.281  61.760  0.00  0.00           C  
ATOM   3978  C   CNT A 208      -8.478  13.131  62.230  6.00  0.00           C  
ATOM   3979  C   CNT A 208      -7.215  13.047  59.760  3.00  0.00           C  
ATOM   3980  C   CNT A 208      -7.778  11.879  60.330  0.00  0.00           C  
ATOM   3981  C   CNT A 208      -8.456  11.906  61.530  3.00  0.00           C  
ATOM   3982  C   CNT A 208      -8.866  10.663  62.090  3.00  0.00           C  
ATOM   3983  C   CNT A 208      -7.698  10.701  59.550  8.00  0.00           C  
ATOM   3984  C   CNT A 208      -8.090   9.480  60.160  1.00  0.00           C  
ATOM   3985  C   CNT A 208      -8.546   9.494  61.450  3.00  0.00           C  
ATOM   3986  C   CNT A 208      -8.808   8.306  62.160  5.00  0.00           C  
ATOM   3987  C   CNT A 208      -7.668   8.236  59.590  6.00  0.00           C  
ATOM   3988  C   CNT A 208      -7.602   7.117  60.390  0.00  0.00           C  
ATOM   3989  C   CNT A 208      -8.203   7.156  61.640  4.00  0.00           C  
ATOM   3990  C   CNT A 208      -7.861   6.166  62.600  7.00  0.00           C  
ATOM   3991  C   CNT A 208      -6.658   6.158  60.070  6.00  0.00           C  
ATOM   3992  C   CNT A 208      -6.333   5.145  61.010  3.00  0.00           C  
ATOM   3993  C   CNT A 208      -6.916   5.187  62.260  9.00  0.00           C  
ATOM   3994  C   CNT A 208      -6.300   4.430  63.320  5.00  0.00           C  
ATOM   3995  C   CNT A 208      -5.200   4.431  60.710  5.00  0.00           C  
ATOM   3996  C   CNT A 208      -4.489   3.920  61.820  1.00  0.00           C  
ATOM   3997  C   CNT A 208      -5.041   3.877  63.090  7.00  0.00           C  
ATOM   3998  C   CNT A 208      -4.239   3.538  64.190  3.00  0.00           C  
ATOM   3999  C   CNT A 208      -3.203   3.395  61.580  3.00  0.00           C  
ATOM   4000  C   CNT A 208      -2.347   3.284  62.670  6.00  0.00           C  
ATOM   4001  C   CNT A 208      -2.874   3.220  64.020  3.00  0.00           C  
ATOM   4002  C   CNT A 208      -2.017   3.221  65.100  7.00  0.00           C  
ATOM   4003  C   CNT A 208      -0.974   3.184  62.530  3.00  0.00           C  
ATOM   4004  C   CNT A 208      -0.113   3.338  63.650  0.00  0.00           C  
ATOM   4005  C   CNT A 208      -0.673   3.344  64.930  2.00  0.00           C  
ATOM   4006  C   CNT A 208       0.132   3.711  66.030  9.00  0.00           C  
ATOM   4007  C   CNT A 208       1.069   3.946  63.400  3.00  0.00           C  
ATOM   4008  C   CNT A 208       1.836   4.466  64.480  8.00  0.00           C  
ATOM   4009  C   CNT A 208       1.321   4.407  65.740  1.00  0.00           C  
ATOM   4010  C   CNT A 208       1.949   5.046  66.810  4.00  0.00           C  
ATOM   4011  C   CNT A 208       3.063   5.115  64.190  7.00  0.00           C  
ATOM   4012  C   CNT A 208       3.703   5.815  65.230  7.00  0.00           C  
ATOM   4013  C   CNT A 208       3.137   5.793  66.480  7.00  0.00           C  
ATOM   4014  C   CNT A 208       3.485   6.825  67.390  0.00  0.00           C  
ATOM   4015  C   CNT A 208       4.555   6.849  64.830  0.00  0.00           C  
ATOM   4016  C   CNT A 208       4.882   7.933  65.730  4.00  0.00           C  
ATOM   4017  C   CNT A 208       4.339   7.928  66.990  3.00  0.00           C  
ATOM   4018  C   CNT A 208       4.480   9.073  67.780  3.00  0.00           C  
ATOM   4019  C   CNT A 208       5.378   9.122  65.120  3.00  0.00           C  
ATOM   4020  C   CNT A 208       5.343  10.309  65.880  2.00  0.00           C  
ATOM   4021  C   CNT A 208       4.852  10.298  67.190  6.00  0.00           C  
ATOM   4022  C   CNT A 208       4.596  11.484  67.840  4.00  0.00           C  
ATOM   4023  C   CNT A 208       5.862  11.539  65.350  8.00  0.00           C  
ATOM   4024  C   CNT A 208       5.420  12.790  65.910  5.00  0.00           C  
ATOM   4025  C   CNT A 208       4.869  12.732  67.190  6.00  0.00           C  
ATOM   4026  C   CNT A 208       4.344  13.939  67.680  9.00  0.00           C  
ATOM   4027  C   CNT A 208       5.398  13.912  65.130  0.00  0.00           C  
ATOM   4028  C   CNT A 208       4.784  15.092  65.570  3.00  0.00           C  
ATOM   4029  C   CNT A 208       4.338  15.116  66.880  9.00  0.00           C  
ATOM   4030  C   CNT A 208       3.421  16.057  67.250  8.00  0.00           C  
ATOM   4031  C   CNT A 208       4.425  16.082  64.670  3.00  0.00           C  
ATOM   4032  C   CNT A 208       3.477  17.045  65.000  6.00  0.00           C  
ATOM   4033  C   CNT A 208       2.919  16.962  66.260  7.00  0.00           C  
ATOM   4034  C   CNT A 208       1.737  17.711  66.530  3.00  0.00           C  
ATOM   4035  C   CNT A 208       2.934  17.855  64.010  4.00  0.00           C  
ATOM   4036  C   CNT A 208       1.630  18.324  64.200  3.00  0.00           C  
ATOM   4037  C   CNT A 208       1.050  18.373  65.450  6.00  0.00           C  
ATOM   4038  C   CNT A 208      -0.236  18.918  65.690  6.00  0.00           C  
ATOM   4039  C   CNT A 208       0.838  18.782  63.160  4.00  0.00           C  
ATOM   4040  C   CNT A 208      -0.461  19.131  63.350  1.00  0.00           C  
ATOM   4041  C   CNT A 208      -1.062  19.137  64.570  3.00  0.00           C  
ATOM   4042  C   CNT A 208      -2.447  19.129  64.780  8.00  0.00           C  
ATOM   4043  C   CNT A 208      -1.319  19.285  62.230  1.00  0.00           C  
ATOM   4044  C   CNT A 208      -2.722  19.138  62.430  2.00  0.00           C  
ATOM   4045  C   CNT A 208      -3.277  19.198  63.660  9.00  0.00           C  
ATOM   4046  C   CNT A 208      -4.599  18.732  63.860  5.00  0.00           C  
ATOM   4047  C   CNT A 208      -3.439  18.656  61.350  9.00  0.00           C  
ATOM   4048  C   CNT A 208      -4.670  18.053  61.570  7.00  0.00           C  
ATOM   4049  C   CNT A 208      -5.228  18.111  62.830  0.00  0.00           C  
ATOM   4050  C   CNT A 208      -6.316  17.335  63.120  0.00  0.00           C  
ATOM   4051  C   CNT A 208      -5.288  17.317  60.560  2.00  0.00           C  
ATOM   4052  C   CNT A 208      -6.346  16.416  60.830  9.00  0.00           C  
ATOM   4053  C   CNT A 208      -6.815  16.404  62.170  8.00  0.00           C  
ATOM   4054  C   CNT A 208      -7.571  15.310  62.610  6.00  0.00           C  
ATOM   4055  C   CNT A 208      -8.161  15.234  63.850  6.00  0.00           C  
ATOM   4056  C   CNT A 208      -8.922  14.236  64.310  6.00  0.00           C  
ATOM   4057  C   CNT A 208      -9.576  14.316  65.560  6.00  0.00           C  
ATOM   4058  C   CNT A 208     -10.281  13.186  66.040  6.00  0.00           C  
ATOM   4059  C   CNT A 208      -9.010  13.115  63.520  5.00  0.00           C  
ATOM   4060  C   CNT A 208      -9.603  11.934  63.960  3.00  0.00           C  
ATOM   4061  C   CNT A 208     -10.231  12.003  65.220  6.00  0.00           C  
ATOM   4062  C   CNT A 208     -10.771  10.783  65.840  8.00  0.00           C  
ATOM   4063  C   CNT A 208      -9.560  10.705  63.300  2.00  0.00           C  
ATOM   4064  C   CNT A 208      -9.815   9.503  63.990  4.00  0.00           C  
ATOM   4065  C   CNT A 208     -10.314   9.554  65.290  1.00  0.00           C  
ATOM   4066  C   CNT A 208     -10.406   8.392  66.030  0.00  0.00           C  
ATOM   4067  C   CNT A 208      -9.436   8.296  63.390  5.00  0.00           C  
ATOM   4068  C   CNT A 208      -9.228   7.255  64.280  0.00  0.00           C  
ATOM   4069  C   CNT A 208      -9.723   7.237  65.580  9.00  0.00           C  
ATOM   4070  C   CNT A 208      -9.372   6.260  66.490  3.00  0.00           C  
ATOM   4071  C   CNT A 208      -8.407   6.160  63.890  6.00  0.00           C  
ATOM   4072  C   CNT A 208      -8.006   5.208  64.870  2.00  0.00           C  
ATOM   4073  C   CNT A 208      -8.451   5.302  66.180  1.00  0.00           C  
ATOM   4074  C   CNT A 208      -7.854   4.569  67.190  1.00  0.00           C  
ATOM   4075  C   CNT A 208      -6.871   4.419  64.600  5.00  0.00           C  
ATOM   4076  C   CNT A 208      -6.129   3.822  65.600  9.00  0.00           C  
ATOM   4077  C   CNT A 208      -6.717   3.791  66.900  6.00  0.00           C  
ATOM   4078  C   CNT A 208      -5.867   3.340  67.980  6.00  0.00           C  
ATOM   4079  C   CNT A 208      -4.809   3.465  65.460  4.00  0.00           C  
ATOM   4080  C   CNT A 208      -3.939   3.243  66.530  9.00  0.00           C  
ATOM   4081  C   CNT A 208      -4.470   3.256  67.830  9.00  0.00           C  
ATOM   4082  C   CNT A 208      -3.690   3.323  68.960  9.00  0.00           C  
ATOM   4083  C   CNT A 208      -2.586   3.331  66.350  8.00  0.00           C  
ATOM   4084  C   CNT A 208      -1.788   3.607  67.450  3.00  0.00           C  
ATOM   4085  C   CNT A 208      -2.386   3.636  68.720  1.00  0.00           C  
ATOM   4086  C   CNT A 208      -1.540   3.817  69.810  9.00  0.00           C  
ATOM   4087  C   CNT A 208      -0.450   3.837  67.300  6.00  0.00           C  
ATOM   4088  C   CNT A 208       0.329   4.242  68.360  9.00  0.00           C  
ATOM   4089  C   CNT A 208      -0.223   4.318  69.620  9.00  0.00           C  
ATOM   4090  C   CNT A 208       0.350   5.119  70.600  8.00  0.00           C  
ATOM   4091  C   CNT A 208       1.482   5.095  68.100  6.00  0.00           C  
ATOM   4092  C   CNT A 208       1.945   5.988  69.020  7.00  0.00           C  
ATOM   4093  C   CNT A 208       1.347   6.078  70.290  5.00  0.00           C  
ATOM   4094  C   CNT A 208       1.731   7.033  71.240  9.00  0.00           C  
ATOM   4095  C   CNT A 208       2.972   6.870  68.700  2.00  0.00           C  
ATOM   4096  C   CNT A 208       3.165   7.987  69.550  0.00  0.00           C  
ATOM   4097  C   CNT A 208       2.505   8.040  70.810  9.00  0.00           C  
ATOM   4098  C   CNT A 208       2.667   9.169  71.620  7.00  0.00           C  
ATOM   4099  C   CNT A 208       3.800   9.153  69.050  7.00  0.00           C  
ATOM   4100  C   CNT A 208       3.727  10.350  69.770  6.00  0.00           C  
ATOM   4101  C   CNT A 208       3.193  10.368  71.080  2.00  0.00           C  
ATOM   4102  C   CNT A 208       3.178  11.581  71.800  3.00  0.00           C  
ATOM   4103  C   CNT A 208       4.011  11.552  69.110  1.00  0.00           C  
ATOM   4104  C   CNT A 208       3.732  12.732  69.740  8.00  0.00           C  
ATOM   4105  C   CNT A 208       3.178  12.731  71.010  6.00  0.00           C  
ATOM   4106  C   CNT A 208       2.684  13.912  71.550  0.00  0.00           C  
ATOM   4107  C   CNT A 208       3.825  13.891  69.000  6.00  0.00           C  
ATOM   4108  C   CNT A 208       2.964  14.982  69.370  3.00  0.00           C  
ATOM   4109  C   CNT A 208       2.435  14.988  70.680  0.00  0.00           C  
ATOM   4110  C   CNT A 208       1.580  16.014  71.060  0.00  0.00           C  
ATOM   4111  C   CNT A 208       2.688  16.009  68.440  3.00  0.00           C  
ATOM   4112  C   CNT A 208       1.787  17.001  68.810  7.00  0.00           C  
ATOM   4113  C   CNT A 208       1.263  17.037  70.120  4.00  0.00           C  
ATOM   4114  C   CNT A 208       0.105  17.861  70.430  5.00  0.00           C  
ATOM   4115  C   CNT A 208       1.208  17.783  67.840  3.00  0.00           C  
ATOM   4116  C   CNT A 208       0.049  18.510  68.070  3.00  0.00           C  
ATOM   4117  C   CNT A 208      -0.528  18.486  69.310  1.00  0.00           C  
ATOM   4118  C   CNT A 208      -1.888  18.922  69.570  7.00  0.00           C  
ATOM   4119  C   CNT A 208      -0.761  18.827  66.960  3.00  0.00           C  
ATOM   4120  C   CNT A 208      -2.126  19.139  67.170  0.00  0.00           C  
ATOM   4121  C   CNT A 208      -2.691  19.204  68.470  3.00  0.00           C  
ATOM   4122  C   CNT A 208      -4.074  19.285  68.600  7.00  0.00           C  
ATOM   4123  C   CNT A 208      -3.010  19.201  66.030  0.00  0.00           C  
ATOM   4124  C   CNT A 208      -4.342  19.104  66.170  8.00  0.00           C  
ATOM   4125  C   CNT A 208      -4.853  19.111  67.500  8.00  0.00           C  
ATOM   4126  C   CNT A 208      -6.207  18.709  67.710  9.00  0.00           C  
ATOM   4127  C   CNT A 208      -5.203  18.809  65.080  9.00  0.00           C  
ATOM   4128  C   CNT A 208      -6.439  18.200  65.370  3.00  0.00           C  
ATOM   4129  C   CNT A 208      -6.889  18.062  66.670  9.00  0.00           C  
ATOM   4130  C   CNT A 208      -8.058  17.341  66.940  3.00  0.00           C  
ATOM   4131  C   CNT A 208      -6.858  17.271  64.410  5.00  0.00           C  
ATOM   4132  C   CNT A 208      -7.906  16.354  64.770  6.00  0.00           C  
ATOM   4133  C   CNT A 208      -8.560  16.480  65.970  5.00  0.00           C  
ATOM   4134  C   CNT A 208      -9.385  15.326  66.460  2.00  0.00           C  
ATOM   4135  C   CNT A 208     -10.001  15.383  67.740  6.00  0.00           C  
ATOM   4136  C   CNT A 208     -10.806  14.314  68.120  8.00  0.00           C  
ATOM   4137  C   CNT A 208     -11.405  14.347  69.370  6.00  0.00           C  
ATOM   4138  C   CNT A 208     -12.024  13.193  69.890  6.00  0.00           C  
ATOM   4139  C   CNT A 208     -10.827  13.160  67.330  0.00  0.00           C  
ATOM   4140  C   CNT A 208     -11.409  12.005  67.840  2.00  0.00           C  
ATOM   4141  C   CNT A 208     -11.959  11.987  69.180  3.00  0.00           C  
ATOM   4142  C   CNT A 208     -12.474  10.807  69.740  6.00  0.00           C  
ATOM   4143  C   CNT A 208     -11.403  10.815  67.090  7.00  0.00           C  
ATOM   4144  C   CNT A 208     -11.543   9.616  67.810  5.00  0.00           C  
ATOM   4145  C   CNT A 208     -12.039   9.610  69.190  3.00  0.00           C  
ATOM   4146  C   CNT A 208     -12.095   8.403  69.920  8.00  0.00           C  
ATOM   4147  C   CNT A 208     -10.967   8.467  67.300  3.00  0.00           C  
ATOM   4148  C   CNT A 208     -10.777   7.365  68.170  9.00  0.00           C  
ATOM   4149  C   CNT A 208     -11.245   7.368  69.550  2.00  0.00           C  
ATOM   4150  C   CNT A 208     -10.835   6.397  70.450  9.00  0.00           C  
ATOM   4151  C   CNT A 208      -9.918   6.301  67.750  8.00  0.00           C  
ATOM   4152  C   CNT A 208      -9.433   5.423  68.740  0.00  0.00           C  
ATOM   4153  C   CNT A 208      -9.920   5.464  70.060  0.00  0.00           C  
ATOM   4154  C   CNT A 208      -9.433   4.538  70.990  6.00  0.00           C  
ATOM   4155  C   CNT A 208      -8.384   4.576  68.480  8.00  0.00           C  
ATOM   4156  C   CNT A 208      -7.717   3.845  69.490  3.00  0.00           C  
ATOM   4157  C   CNT A 208      -8.223   3.814  70.780  3.00  0.00           C  
ATOM   4158  C   CNT A 208      -7.482   3.319  71.860  6.00  0.00           C  
ATOM   4159  C   CNT A 208      -6.409   3.267  69.280  5.00  0.00           C  
ATOM   4160  C   CNT A 208      -5.618   3.048  70.410  2.00  0.00           C  
ATOM   4161  C   CNT A 208      -6.168   2.955  71.640  2.00  0.00           C  
ATOM   4162  C   CNT A 208      -5.341   3.029  72.750  4.00  0.00           C  
ATOM   4163  C   CNT A 208      -4.250   3.197  70.210  4.00  0.00           C  
ATOM   4164  C   CNT A 208      -3.451   3.519  71.320  0.00  0.00           C  
ATOM   4165  C   CNT A 208      -3.972   3.373  72.610  8.00  0.00           C  
ATOM   4166  C   CNT A 208      -3.213   3.855  73.640  6.00  0.00           C  
ATOM   4167  C   CNT A 208      -2.076   3.731  71.140  5.00  0.00           C  
ATOM   4168  C   CNT A 208      -1.363   4.333  72.150  6.00  0.00           C  
ATOM   4169  C   CNT A 208      -1.918   4.323  73.450  2.00  0.00           C  
ATOM   4170  C   CNT A 208      -1.288   5.020  74.510  0.00  0.00           C  
ATOM   4171  C   CNT A 208      -0.131   5.019  71.910  8.00  0.00           C  
ATOM   4172  C   CNT A 208       0.295   5.915  72.880  3.00  0.00           C  
ATOM   4173  C   CNT A 208      -0.288   5.928  74.150  4.00  0.00           C  
ATOM   4174  C   CNT A 208       0.091   6.937  75.080  8.00  0.00           C  
ATOM   4175  C   CNT A 208       1.209   6.952  72.540  1.00  0.00           C  
ATOM   4176  C   CNT A 208       1.427   8.048  73.360  7.00  0.00           C  
ATOM   4177  C   CNT A 208       0.789   8.063  74.620  8.00  0.00           C  
ATOM   4178  C   CNT A 208       0.972   9.194  75.450  6.00  0.00           C  
ATOM   4179  C   CNT A 208       2.112   9.205  72.930  4.00  0.00           C  
ATOM   4180  C   CNT A 208       2.152  10.372  73.670  4.00  0.00           C  
ATOM   4181  C   CNT A 208       1.462  10.365  74.870  9.00  0.00           C  
ATOM   4182  C   CNT A 208       1.259  11.568  75.580  9.00  0.00           C  
ATOM   4183  C   CNT A 208       2.442  11.575  73.000  7.00  0.00           C  
ATOM   4184  C   CNT A 208       2.028  12.752  73.570  3.00  0.00           C  
ATOM   4185  C   CNT A 208       1.438  12.741  74.860  1.00  0.00           C  
ATOM   4186  C   CNT A 208       0.914  13.926  75.430  0.00  0.00           C  
ATOM   4187  C   CNT A 208       2.148  13.921  72.860  4.00  0.00           C  
ATOM   4188  C   CNT A 208       1.408  15.040  73.240  8.00  0.00           C  
ATOM   4189  C   CNT A 208       0.832  15.064  74.550  8.00  0.00           C  
ATOM   4190  C   CNT A 208       0.017  16.102  74.980  7.00  0.00           C  
ATOM   4191  C   CNT A 208       1.117  16.062  72.380  3.00  0.00           C  
ATOM   4192  C   CNT A 208       0.220  17.087  72.780  2.00  0.00           C  
ATOM   4193  C   CNT A 208      -0.396  17.061  74.070  5.00  0.00           C  
ATOM   4194  C   CNT A 208      -1.534  17.829  74.290  3.00  0.00           C  
ATOM   4195  C   CNT A 208      -0.369  17.905  71.740  8.00  0.00           C  
ATOM   4196  C   CNT A 208      -1.614  18.490  71.990  3.00  0.00           C  
ATOM   4197  C   CNT A 208      -2.187  18.463  73.230  8.00  0.00           C  
ATOM   4198  C   CNT A 208      -3.480  18.902  73.440  0.00  0.00           C  
ATOM   4199  C   CNT A 208      -2.443  18.863  70.900  0.00  0.00           C  
ATOM   4200  C   CNT A 208      -3.758  19.220  71.060  8.00  0.00           C  
ATOM   4201  C   CNT A 208      -4.311  19.068  72.320  8.00  0.00           C  
ATOM   4202  C   CNT A 208      -5.678  19.093  72.540  8.00  0.00           C  
ATOM   4203  C   CNT A 208      -4.597  19.263  69.940  9.00  0.00           C  
ATOM   4204  C   CNT A 208      -5.977  18.990  70.130  5.00  0.00           C  
ATOM   4205  C   CNT A 208      -6.493  19.057  71.380  4.00  0.00           C  
ATOM   4206  C   CNT A 208      -7.834  18.661  71.560  1.00  0.00           C  
ATOM   4207  C   CNT A 208      -6.746  18.727  69.000  9.00  0.00           C  
ATOM   4208  C   CNT A 208      -8.035  18.130  69.230  6.00  0.00           C  
ATOM   4209  C   CNT A 208      -8.544  18.093  70.530  2.00  0.00           C  
ATOM   4210  C   CNT A 208      -9.694  17.261  70.790  8.00  0.00           C  
ATOM   4211  C   CNT A 208      -8.622  17.309  68.230  2.00  0.00           C  
ATOM   4212  C   CNT A 208      -9.672  16.462  68.510  8.00  0.00           C  
ATOM   4213  C   CNT A 208     -10.235  16.409  69.810  2.00  0.00           C  
ATOM   4214  C   CNT A 208     -11.159  15.487  70.170  4.00  0.00           C  
ATOM   4215  C   CNT A 208     -11.684  15.462  71.510  6.00  0.00           C  
ATOM   4216  C   CNT A 208     -12.573  14.450  71.910  4.00  0.00           C  
ATOM   4217  C   CNT A 208     -13.153  14.513  73.210  1.00  0.00           C  
ATOM   4218  C   CNT A 208     -13.928  13.436  73.530  1.00  0.00           C  
ATOM   4219  C   CNT A 208     -12.532  13.209  71.260  8.00  0.00           C  
ATOM   4220  C   CNT A 208     -13.135  11.994  71.780  1.00  0.00           C  
ATOM   4221  C   CNT A 208     -13.956  12.096  72.990  4.00  0.00           C  
ATOM   4222  C   CNT A 208     -14.511  10.821  73.380  7.00  0.00           C  
ATOM   4223  C   CNT A 208     -13.036  10.800  71.050  1.00  0.00           C  
ATOM   4224  C   CNT A 208     -13.200   9.557  71.720  6.00  0.00           C  
ATOM   4225  C   CNT A 208     -13.748   9.630  73.060  6.00  0.00           C  
ATOM   4226  C   CNT A 208     -13.419   8.510  73.870  7.00  0.00           C  
ATOM   4227  C   CNT A 208     -12.486   8.434  71.260  8.00  0.00           C  
ATOM   4228  C   CNT A 208     -12.209   7.363  72.130  0.00  0.00           C  
ATOM   4229  C   CNT A 208     -12.839   7.318  73.390  4.00  0.00           C  
ATOM   4230  C   CNT A 208     -12.854   6.034  73.990  4.00  0.00           C  
ATOM   4231  C   CNT A 208     -11.300   6.363  71.780  8.00  0.00           C  
ATOM   4232  C   CNT A 208     -11.086   5.278  72.600  1.00  0.00           C  
ATOM   4233  C   CNT A 208     -11.777   5.141  73.790  9.00  0.00           C  
ATOM   4234  C   CNT A 208     -11.208   4.302  74.790  4.00  0.00           C  
ATOM   4235  C   CNT A 208     -10.007   4.452  72.240  8.00  0.00           C  
ATOM   4236  C   CNT A 208      -9.333   3.820  73.280  7.00  0.00           C  
ATOM   4237  C   CNT A 208      -9.981   3.597  74.560  1.00  0.00           C  
ATOM   4238  C   CNT A 208      -9.136   2.992  75.570  2.00  0.00           C  
ATOM   4239  C   CNT A 208      -8.008   3.345  73.140  0.00  0.00           C  
ATOM   4240  C   CNT A 208      -7.156   3.098  74.230  7.00  0.00           C  
ATOM   4241  C   CNT A 208      -7.726   2.982  75.560  4.00  0.00           C  
ATOM   4242  C   CNT A 208      -6.830   2.987  76.600  8.00  0.00           C  
ATOM   4243  C   CNT A 208      -5.818   2.967  74.050  6.00  0.00           C  
ATOM   4244  C   CNT A 208      -4.966   3.186  75.150  8.00  0.00           C  
ATOM   4245  C   CNT A 208      -5.432   3.042  76.520  3.00  0.00           C  
ATOM   4246  C   CNT A 208      -4.428   3.153  77.490  0.00  0.00           C  
ATOM   4247  C   CNT A 208      -3.692   3.775  74.940  0.00  0.00           C  
ATOM   4248  C   CNT A 208      -2.969   4.320  76.010  2.00  0.00           C  
ATOM   4249  C   CNT A 208      -3.477   4.163  77.330  5.00  0.00           C  
ATOM   4250  C   CNT A 208      -2.950   5.114  78.280  5.00  0.00           C  
ATOM   4251  C   CNT A 208      -1.802   4.998  75.810  4.00  0.00           C  
ATOM   4252  C   CNT A 208      -1.383   5.994  76.710  8.00  0.00           C  
ATOM   4253  C   CNT A 208      -2.012   6.084  78.000  3.00  0.00           C  
ATOM   4254  C   CNT A 208      -1.477   7.019  78.840  9.00  0.00           C  
ATOM   4255  C   CNT A 208      -0.323   6.859  76.410  0.00  0.00           C  
ATOM   4256  C   CNT A 208       0.062   7.955  77.260  6.00  0.00           C  
ATOM   4257  C   CNT A 208      -0.462   7.976  78.540  8.00  0.00           C  
ATOM   4258  C   CNT A 208      -0.114   9.000  79.370  2.00  0.00           C  
ATOM   4259  C   CNT A 208       0.501   9.153  76.740  2.00  0.00           C  
ATOM   4260  C   CNT A 208       0.574  10.368  77.510  8.00  0.00           C  
ATOM   4261  C   CNT A 208       0.189  10.306  78.810  9.00  0.00           C  
ATOM   4262  C   CNT A 208       0.076  11.526  79.460  6.00  0.00           C  
ATOM   4263  C   CNT A 208       0.738  11.615  76.890  4.00  0.00           C  
ATOM   4264  C   CNT A 208       0.273  12.773  77.480  9.00  0.00           C  
ATOM   4265  C   CNT A 208      -0.134  12.780  78.830  9.00  0.00           C  
ATOM   4266  C   CNT A 208      -0.617  14.086  79.230  6.00  0.00           C  
ATOM   4267  C   CNT A 208       0.284  13.920  76.670  8.00  0.00           C  
ATOM   4268  C   CNT A 208      -0.327  15.105  77.120  1.00  0.00           C  
ATOM   4269  C   CNT A 208      -0.616  15.285  78.490  5.00  0.00           C  
ATOM   4270  C   CNT A 208      -0.941  16.616  78.930  3.00  0.00           C  
ATOM   4271  C   CNT A 208      -0.570  16.154  76.220  4.00  0.00           C  
ATOM   4272  C   CNT A 208      -1.478  17.180  76.620  0.00  0.00           C  
ATOM   4273  C   CNT A 208      -1.811  17.325  78.000  0.00  0.00           C  
ATOM   4274  C   CNT A 208      -2.945  18.204  78.200  3.00  0.00           C  
ATOM   4275  C   CNT A 208      -2.052  17.944  75.570  1.00  0.00           C  
ATOM   4276  C   CNT A 208      -3.210  18.574  75.850  7.00  0.00           C  
ATOM   4277  C   CNT A 208      -3.677  18.836  77.170  3.00  0.00           C  
ATOM   4278  C   CNT A 208      -4.915  19.512  77.130  5.00  0.00           C  
ATOM   4279  C   CNT A 208      -4.029  18.986  74.720  9.00  0.00           C  
ATOM   4280  C   CNT A 208      -5.453  19.283  74.900  1.00  0.00           C  
ATOM   4281  C   CNT A 208      -5.951  19.699  76.160  0.00  0.00           C  
ATOM   4282  C   CNT A 208      -7.340  20.145  76.170  5.00  0.00           C  
ATOM   4283  C   CNT A 208      -6.288  19.175  73.800  1.00  0.00           C  
ATOM   4284  C   CNT A 208      -7.664  19.245  73.900  8.00  0.00           C  
ATOM   4285  C   CNT A 208      -8.265  19.564  75.190  0.00  0.00           C  
ATOM   4286  C   CNT A 208      -9.488  18.889  75.330  1.00  0.00           C  
ATOM   4287  C   CNT A 208      -8.466  18.786  72.850  1.00  0.00           C  
ATOM   4288  C   CNT A 208      -9.594  18.045  73.080  7.00  0.00           C  
ATOM   4289  C   CNT A 208     -10.169  18.184  74.370  4.00  0.00           C  
ATOM   4290  C   CNT A 208     -11.433  17.655  74.490  7.00  0.00           C  
ATOM   4291  C   CNT A 208     -10.150  17.232  72.090  8.00  0.00           C  
ATOM   4292  C   CNT A 208     -11.326  16.513  72.380  8.00  0.00           C  
ATOM   4293  C   CNT A 208     -11.956  16.680  73.630  8.00  0.00           C  
ATOM   4294  C   CNT A 208     -12.956  15.688  73.910  6.00  0.00           C  
ATOM   4295  N   LIG A 209      13.414  12.176   3.450  0.00  0.00           N  
ATOM   4296  N   LIG A 209      21.644   0.433   7.390  1.00  0.00           N  
ATOM   4297  N   LIG A 209      31.050  12.527  10.480  6.00  0.00           N  
ATOM   4298  N   LIG A 209      23.487  19.929   7.580  3.00  0.00           N  
ATOM   4299  N   LIG A 209     -16.103   9.454  74.110  8.00  0.00           N  
ATOM   4300  N   LIG A 209      -5.467   1.396  78.530  0.00  0.00           N  
ATOM   4301  N   LIG A 209       0.306  16.217  80.810  0.00  0.00           N  
ATOM   4302  N   LIG A 209      -8.939  21.575  76.590  8.00  0.00           N  
ATOM   4303  C   LIG A 209      14.114  13.319   3.730  4.00  0.00           C  
ATOM   4304  C   LIG A 209      22.849   0.978   7.880  0.00  0.00           C  
ATOM   4305  C   LIG A 209      30.462  13.782  10.610  5.00  0.00           C  
ATOM   4306  C   LIG A 209      24.573  19.373   8.340  0.00  0.00           C  
ATOM   4307  C   LIG A 209     -15.994  10.841  73.870  9.00  0.00           C  
ATOM   4308  C   LIG A 209      -4.770   2.521  78.880  1.00  0.00           C  
ATOM   4309  C   LIG A 209      -0.498  17.205  80.300  7.00  0.00           C  
ATOM   4310  C   LIG A 209      -7.815  21.068  77.240  4.00  0.00           C  
ATOM   4311  O   LIG A 209      14.594  14.309   3.420  2.00  0.00           O  
ATOM   4312  O   LIG A 209      24.031   0.874   7.990  2.00  0.00           O  
ATOM   4313  O   LIG A 209      30.480  14.881  10.450  8.00  0.00           O  
ATOM   4314  O   LIG A 209      25.695  19.428   8.530  2.00  0.00           O  
ATOM   4315  O   LIG A 209     -16.439  11.954  73.770  5.00  0.00           O  
ATOM   4316  O   LIG A 209      -4.254   3.219  79.650  7.00  0.00           O  
ATOM   4317  O   LIG A 209      -0.925  18.274  80.360  8.00  0.00           O  
ATOM   4318  O   LIG A 209      -7.112  20.925  78.170  8.00  0.00           O  
ATOM   4319  C1  LIG A 209      12.492  11.967   2.270  4.00  0.00           C  
ATOM   4320  C1  LIG A 209      21.653  -0.871   6.710  9.00  0.00           C  
ATOM   4321  C1  LIG A 209      32.439  12.433  10.110  3.00  0.00           C  
ATOM   4322  C1  LIG A 209      23.438  21.368   7.200  7.00  0.00           C  
ATOM   4323  C1  LIG A 209     -17.421   8.755  73.820  0.00  0.00           C  
ATOM   4324  C1  LIG A 209      -5.760   0.387  79.560  3.00  0.00           C  
ATOM   4325  C1  LIG A 209       0.849  16.454  82.130  4.00  0.00           C  
ATOM   4326  C1  LIG A 209      -9.470  22.884  77.010  0.00  0.00           C  
ATOM   4327  N1  LIG A 209      11.193  10.307   3.630  6.00  0.00           N  
ATOM   4328  N1  LIG A 209      22.083  -1.764   9.090  1.00  0.00           N  
ATOM   4329  N1  LIG A 209      32.773  11.232  12.290  3.00  0.00           N  
ATOM   4330  N1  LIG A 209      22.621  21.722   9.650  1.00  0.00           N  
ATOM   4331  N1  LIG A 209     -16.598   6.540  72.970  3.00  0.00           N  
ATOM   4332  N1  LIG A 209      -7.513  -0.380  77.780  7.00  0.00           N  
ATOM   4333  N1  LIG A 209       2.629  14.853  81.570  7.00  0.00           N  
ATOM   4334  N1  LIG A 209      -7.459  23.694  75.690  5.00  0.00           N  
ATOM   4335  O1  LIG A 209      10.225   8.322   7.760  5.00  0.00           O  
ATOM   4336  O1  LIG A 209      22.609  -0.695  13.540  7.00  0.00           O  
ATOM   4337  O1  LIG A 209      30.954   9.513  16.230  2.00  0.00           O  
ATOM   4338  O1  LIG A 209      18.934  20.833  12.430  5.00  0.00           O  
ATOM   4339  O1  LIG A 209     -14.187   5.181  69.290  7.00  0.00           O  
ATOM   4340  O1  LIG A 209      -9.250   0.180  73.520  6.00  0.00           O  
ATOM   4341  O1  LIG A 209       3.683  11.482  78.530  6.00  0.00           O  
ATOM   4342  O1  LIG A 209      -3.753  23.141  73.220  4.00  0.00           O  
ATOM   4343  C2  LIG A 209      11.919  10.539   2.400  0.00  0.00           C  
ATOM   4344  C2  LIG A 209      21.502  -2.060   7.780  0.00  0.00           C  
ATOM   4345  C2  LIG A 209      33.403  12.169  11.320  0.00  0.00           C  
ATOM   4346  C2  LIG A 209      23.546  22.143   8.520  3.00  0.00           C  
ATOM   4347  C2  LIG A 209     -17.430   7.203  73.900  9.00  0.00           C  
ATOM   4348  C2  LIG A 209      -6.524  -0.720  78.830  6.00  0.00           C  
ATOM   4349  C2  LIG A 209       2.316  16.184  82.120  9.00  0.00           C  
ATOM   4350  C2  LIG A 209      -8.815  23.984  76.080  6.00  0.00           C  
ATOM   4351  N2  LIG A 209       9.972  10.650   5.570  2.00  0.00           N  
ATOM   4352  N2  LIG A 209      23.633  -1.897  10.750  1.00  0.00           N  
ATOM   4353  N2  LIG A 209      32.186   9.252  13.340  8.00  0.00           N  
ATOM   4354  N2  LIG A 209      22.038  21.517  11.810  4.00  0.00           N  
ATOM   4355  N2  LIG A 209     -15.367   4.747  72.130  4.00  0.00           N  
ATOM   4356  N2  LIG A 209      -9.473   0.005  76.590  3.00  0.00           N  
ATOM   4357  N2  LIG A 209       3.091  12.619  81.470  5.00  0.00           N  
ATOM   4358  N2  LIG A 209      -5.222  23.474  75.800  0.00  0.00           N  
ATOM   4359  C3  LIG A 209      10.280  11.090   4.370  1.00  0.00           C  
ATOM   4360  C3  LIG A 209      23.393  -2.012   9.430  8.00  0.00           C  
ATOM   4361  C3  LIG A 209      32.647   9.820  12.220  7.00  0.00           C  
ATOM   4362  C3  LIG A 209      23.040  21.881  10.920  2.00  0.00           C  
ATOM   4363  C3  LIG A 209     -15.998   5.288  73.170  4.00  0.00           C  
ATOM   4364  C3  LIG A 209      -8.929  -0.162  77.810  4.00  0.00           C  
ATOM   4365  C3  LIG A 209       2.765  13.701  82.280  8.00  0.00           C  
ATOM   4366  C3  LIG A 209      -6.317  23.740  76.480  1.00  0.00           C  
ATOM   4367  N3  LIG A 209      11.828   7.940   4.140  6.00  0.00           N  
ATOM   4368  N3  LIG A 209      20.111  -1.103  10.410  7.00  0.00           N  
ATOM   4369  N3  LIG A 209      31.883  12.795  13.960  0.00  0.00           N  
ATOM   4370  N3  LIG A 209      20.393  21.186   8.640  9.00  0.00           N  
ATOM   4371  N3  LIG A 209     -16.523   8.023  71.000  6.00  0.00           N  
ATOM   4372  N3  LIG A 209      -5.908  -0.225  75.850  0.00  0.00           N  
ATOM   4373  N3  LIG A 209       3.025  15.357  79.220  7.00  0.00           N  
ATOM   4374  N3  LIG A 209      -7.712  23.250  73.200  9.00  0.00           N  
ATOM   4375  C4  LIG A 209      10.583   9.412   5.650  7.00  0.00           C  
ATOM   4376  C4  LIG A 209      22.409  -1.446  11.280  1.00  0.00           C  
ATOM   4377  C4  LIG A 209      31.925  10.306  14.190  4.00  0.00           C  
ATOM   4378  C4  LIG A 209      20.925  21.161  10.980  4.00  0.00           C  
ATOM   4379  C4  LIG A 209     -15.466   5.787  71.170  1.00  0.00           C  
ATOM   4380  C4  LIG A 209      -8.326  -0.119  75.730  9.00  0.00           C  
ATOM   4381  C4  LIG A 209       3.202  13.203  80.220  4.00  0.00           C  
ATOM   4382  C4  LIG A 209      -5.642  23.364  74.470  8.00  0.00           C  
ATOM   4383  N4  LIG A 209      11.229   7.205   6.270  0.00  0.00           N  
ATOM   4384  N4  LIG A 209      20.643  -0.809  12.640  2.00  0.00           N  
ATOM   4385  N4  LIG A 209      31.007  11.642  15.890  2.00  0.00           N  
ATOM   4386  N4  LIG A 209      18.680  20.771  10.270  2.00  0.00           N  
ATOM   4387  N4  LIG A 209     -14.967   7.268  69.410  7.00  0.00           N  
ATOM   4388  N4  LIG A 209      -7.036  -0.056  73.750  0.00  0.00           N  
ATOM   4389  N4  LIG A 209       3.649  13.496  77.860  9.00  0.00           N  
ATOM   4390  N4  LIG A 209      -5.600  23.054  72.110  2.00  0.00           N  
ATOM   4391  C5  LIG A 209      11.260   9.163   4.440  2.00  0.00           C  
ATOM   4392  C5  LIG A 209      21.462  -1.382  10.260  6.00  0.00           C  
ATOM   4393  C5  LIG A 209      32.156  11.508  13.480  8.00  0.00           C  
ATOM   4394  C5  LIG A 209      21.298  21.337   9.690  0.00  0.00           C  
ATOM   4395  C5  LIG A 209     -16.252   6.830  71.670  1.00  0.00           C  
ATOM   4396  C5  LIG A 209      -7.172  -0.281  76.430  2.00  0.00           C  
ATOM   4397  C5  LIG A 209       2.941  14.496  80.310  0.00  0.00           C  
ATOM   4398  C5  LIG A 209      -6.991  23.340  74.400  7.00  0.00           C  
ATOM   4399  N5  LIG A 209      12.135   5.755   4.820  5.00  0.00           N  
ATOM   4400  N5  LIG A 209      18.594  -0.557  11.960  7.00  0.00           N  
ATOM   4401  N5  LIG A 209      31.062  13.809  15.790  4.00  0.00           N  
ATOM   4402  N5  LIG A 209      18.311  20.799   8.070  0.00  0.00           N  
ATOM   4403  N5  LIG A 209     -16.262   9.017  69.020  9.00  0.00           N  
ATOM   4404  N5  LIG A 209      -4.893  -0.232  73.890  4.00  0.00           N  
ATOM   4405  N5  LIG A 209       3.614  15.597  77.040  8.00  0.00           N  
ATOM   4406  N5  LIG A 209      -7.520  22.605  71.130  0.00  0.00           N  
ATOM   4407  C6  LIG A 209      10.659   8.290   6.660  8.00  0.00           C  
ATOM   4408  C6  LIG A 209      21.926  -1.032  12.600  6.00  0.00           C  
ATOM   4409  C6  LIG A 209      31.311  10.422  15.490  1.00  0.00           C  
ATOM   4410  C6  LIG A 209      19.479  20.917  11.360  6.00  0.00           C  
ATOM   4411  C6  LIG A 209     -14.861   6.010  69.910  4.00  0.00           C  
ATOM   4412  C6  LIG A 209      -8.269  -0.035  74.270  3.00  0.00           C  
ATOM   4413  C6  LIG A 209       3.549  12.662  78.860  7.00  0.00           C  
ATOM   4414  C6  LIG A 209      -4.915  23.203  73.230  1.00  0.00           C  
ATOM   4415  C7  LIG A 209      11.707   7.030   5.090  0.00  0.00           C  
ATOM   4416  C7  LIG A 209      19.796  -0.943  11.670  3.00  0.00           C  
ATOM   4417  C7  LIG A 209      31.399  12.673  15.190  2.00  0.00           C  
ATOM   4418  C7  LIG A 209      19.144  21.015   9.010  8.00  0.00           C  
ATOM   4419  C7  LIG A 209     -15.897   8.115  69.870  5.00  0.00           C  
ATOM   4420  C7  LIG A 209      -6.016  -0.240  74.530  3.00  0.00           C  
ATOM   4421  C7  LIG A 209       3.500  14.833  78.080  4.00  0.00           C  
ATOM   4422  C7  LIG A 209      -6.898  23.066  72.190  3.00  0.00           C  
ATOM   4423  H   LIG A 209      13.014  11.626   4.200  5.00  0.00           H  
ATOM   4424  H   LIG A 209      20.760   0.639   7.760  4.00  0.00           H  
ATOM   4425  H   LIG A 209      30.785  11.903  11.270  8.00  0.00           H  
ATOM   4426  H   LIG A 209      22.533  19.681   7.790  6.00  0.00           H  
ATOM   4427  H   LIG A 209     -15.404   8.896  73.610  4.00  0.00           H  
ATOM   4428  H   LIG A 209      -5.215   0.960  77.670  6.00  0.00           H  
ATOM   4429  H   LIG A 209       0.923  15.711  80.230  7.00  0.00           H  
ATOM   4430  H   LIG A 209      -8.995  21.427  75.620  0.00  0.00           H  
ATOM   4431  H1  LIG A 209      12.974  12.065   1.320  0.00  0.00           H  
ATOM   4432  H1  LIG A 209      22.588  -1.079   6.250  2.00  0.00           H  
ATOM   4433  H1  LIG A 209      32.795  13.329   9.570  3.00  0.00           H  
ATOM   4434  H1  LIG A 209      22.536  21.654   6.610  2.00  0.00           H  
ATOM   4435  H1  LIG A 209     -17.886   8.928  72.880  9.00  0.00           H  
ATOM   4436  H1  LIG A 209      -6.360   0.723  80.420  3.00  0.00           H  
ATOM   4437  H1  LIG A 209       0.355  15.814  82.850  2.00  0.00           H  
ATOM   4438  H1  LIG A 209      -9.289  23.112  78.090  0.00  0.00           H  
ATOM   4439  H2  LIG A 209      11.578  12.641   2.370  2.00  0.00           H  
ATOM   4440  H2  LIG A 209      20.947  -0.872   5.950  1.00  0.00           H  
ATOM   4441  H2  LIG A 209      32.573  11.643   9.410  7.00  0.00           H  
ATOM   4442  H2  LIG A 209      24.288  21.552   6.540  4.00  0.00           H  
ATOM   4443  H2  LIG A 209     -18.210   9.058  74.580  9.00  0.00           H  
ATOM   4444  H2  LIG A 209      -4.876   0.102  80.020  2.00  0.00           H  
ATOM   4445  H2  LIG A 209       0.703  17.492  82.300  1.00  0.00           H  
ATOM   4446  H2  LIG A 209     -10.556  23.065  76.900  8.00  0.00           H  
ATOM   4447  H3  LIG A 209      12.744   9.749   2.290  1.00  0.00           H  
ATOM   4448  H3  LIG A 209      21.742  -3.036   7.460  3.00  0.00           H  
ATOM   4449  H3  LIG A 209      33.648  13.155  11.760  2.00  0.00           H  
ATOM   4450  H3  LIG A 209      23.495  23.217   8.330  1.00  0.00           H  
ATOM   4451  H3  LIG A 209     -18.458   7.008  73.670  1.00  0.00           H  
ATOM   4452  H3  LIG A 209      -7.023  -1.246  79.710  2.00  0.00           H  
ATOM   4453  H3  LIG A 209       2.627  16.194  83.150  7.00  0.00           H  
ATOM   4454  H3  LIG A 209      -8.926  24.919  76.600  6.00  0.00           H  
ATOM   4455  H4  LIG A 209      11.138  10.394   1.610  6.00  0.00           H  
ATOM   4456  H4  LIG A 209      20.488  -2.042   8.000  1.00  0.00           H  
ATOM   4457  H4  LIG A 209      34.324  11.714  11.020  3.00  0.00           H  
ATOM   4458  H4  LIG A 209      24.557  21.971   8.950  0.00  0.00           H  
ATOM   4459  H4  LIG A 209     -17.159   6.932  74.920  5.00  0.00           H  
ATOM   4460  H4  LIG A 209      -5.757  -1.455  78.430  5.00  0.00           H  
ATOM   4461  H4  LIG A 209       2.831  16.963  81.650  3.00  0.00           H  
ATOM   4462  H4  LIG A 209      -9.404  24.076  75.170  7.00  0.00           H  
ATOM   4463  H5  LIG A 209       9.797  12.016   4.070  8.00  0.00           H  
ATOM   4464  H5  LIG A 209      24.087  -2.246   8.640  7.00  0.00           H  
ATOM   4465  H5  LIG A 209      32.735   9.222  11.290  1.00  0.00           H  
ATOM   4466  H5  LIG A 209      24.066  22.149  11.110  4.00  0.00           H  
ATOM   4467  H5  LIG A 209     -16.147   4.792  74.080  9.00  0.00           H  
ATOM   4468  H5  LIG A 209      -9.478  -0.097  78.730  9.00  0.00           H  
ATOM   4469  H5  LIG A 209       2.402  13.645  83.290  9.00  0.00           H  
ATOM   4470  H5  LIG A 209      -6.350  23.920  77.580  0.00  0.00           H  
ATOM   4471  H6  LIG A 209      11.203   6.395   6.800  4.00  0.00           H  
ATOM   4472  H6  LIG A 209      20.334  -0.569  13.570  2.00  0.00           H  
ATOM   4473  H6  LIG A 209      30.509  11.761  16.750  7.00  0.00           H  
ATOM   4474  H6  LIG A 209      17.708  20.660  10.400  7.00  0.00           H  
ATOM   4475  H6  LIG A 209     -14.570   7.489  68.550  3.00  0.00           H  
ATOM   4476  H6  LIG A 209      -6.902  -0.121  72.770  2.00  0.00           H  
ATOM   4477  H6  LIG A 209       3.825  13.015  77.010  2.00  0.00           H  
ATOM   4478  H6  LIG A 209      -5.115  22.633  71.330  7.00  0.00           H  
ATOM   4479  H7  LIG A 209      12.109   5.126   5.610  3.00  0.00           H  
ATOM   4480  H7  LIG A 209      18.504  -0.227  12.940  4.00  0.00           H  
ATOM   4481  H7  LIG A 209      31.093  14.652  15.200  4.00  0.00           H  
ATOM   4482  H7  LIG A 209      17.323  20.603   8.160  5.00  0.00           H  
ATOM   4483  H7  LIG A 209     -15.965   8.981  68.000  7.00  0.00           H  
ATOM   4484  H7  LIG A 209      -4.147  -0.584  74.550  7.00  0.00           H  
ATOM   4485  H7  LIG A 209       4.119  15.195  76.310  3.00  0.00           H  
ATOM   4486  H7  LIG A 209      -6.980  22.314  70.290  8.00  0.00           H  
ATOM   4487  H8  LIG A 209      12.814   5.628   4.020  2.00  0.00           H  
ATOM   4488  H8  LIG A 209      18.271   0.052  11.220  1.00  0.00           H  
ATOM   4489  H8  LIG A 209      30.199  13.760  16.390  9.00  0.00           H  
ATOM   4490  H8  LIG A 209      18.691  20.938   7.170  2.00  0.00           H  
ATOM   4491  H8  LIG A 209     -17.134   9.388  69.220  7.00  0.00           H  
ATOM   4492  H8  LIG A 209      -4.872  -0.786  73.060  1.00  0.00           H  
ATOM   4493  H8  LIG A 209       3.388  16.594  77.160  8.00  0.00           H  
ATOM   4494  H8  LIG A 209      -8.510  22.457  71.310  8.00  0.00           H  
END
