# Supplementary material for: Molecular Dynamics Study of the Interaction of Carbon Nanotubes with Telomeric DNA Fragment Containing Noncanonical G-Quadruplex and i-Motif Forms
Source: Int J Mol Sci. 2020 Mar 11;21(6):1925. doi: 10.3390/ijms21061925 (PMC7139311; doi:10.3390/ijms21061925)
Supplement: Supplementary file 1 [file ijms-21-01925-s001.zip › fig7_a10.pdb]

ATOM      1  C5' DG5 A   1     -64.344 -22.531  11.280  9.00  0.00           C  
ATOM      2  O5' DG5 A   1     -64.578 -23.748  11.970  7.00  0.00           O  
ATOM      3  C4' DG5 A   1     -63.044 -22.700  10.410  6.00  0.00           C  
ATOM      4  O4' DG5 A   1     -61.958 -23.108  11.260  6.00  0.00           O  
ATOM      5  C3' DG5 A   1     -63.058 -23.815   9.390  1.00  0.00           C  
ATOM      6  O3' DG5 A   1     -62.378 -23.503   8.200  1.00  0.00           O  
ATOM      7  C2' DG5 A   1     -62.339 -24.980  10.060  7.00  0.00           C  
ATOM      8  C1' DG5 A   1     -61.226 -24.178  10.710  8.00  0.00           C  
ATOM      9  N1  DG5 A   1     -56.571 -23.862  12.760  8.00  0.00           N  
ATOM     10  C2  DG5 A   1     -57.191 -22.972  11.880  2.00  0.00           C  
ATOM     11  N2  DG5 A   1     -56.615 -21.920  11.470  4.00  0.00           N  
ATOM     12  N3  DG5 A   1     -58.429 -23.195  11.420  8.00  0.00           N  
ATOM     13  C4  DG5 A   1     -59.016 -24.312  11.930  9.00  0.00           C  
ATOM     14  C5  DG5 A   1     -58.464 -25.262  12.780  2.00  0.00           C  
ATOM     15  C6  DG5 A   1     -57.051 -25.112  13.120  0.00  0.00           C  
ATOM     16  O6  DG5 A   1     -56.330 -25.856  13.740  2.00  0.00           O  
ATOM     17  N7  DG5 A   1     -59.294 -26.389  12.920  7.00  0.00           N  
ATOM     18  C8  DG5 A   1     -60.249 -25.987  12.190  9.00  0.00           C  
ATOM     19  N9  DG5 A   1     -60.227 -24.802  11.630  0.00  0.00           N  
ATOM     20 HO5' DG5 A   1     -63.756 -24.099  12.290  1.00  0.00           H  
ATOM     21  H1  DG5 A   1     -55.542 -23.781  12.810  3.00  0.00           H  
ATOM     22  H8  DG5 A   1     -61.106 -26.666  12.200  3.00  0.00           H  
ATOM     23  H1' DG5 A   1     -60.701 -23.705   9.870  3.00  0.00           H  
ATOM     24  H2' DG5 A   1     -62.983 -25.362  10.760  7.00  0.00           H  
ATOM     25  H21 DG5 A   1     -55.652 -21.867  11.720  9.00  0.00           H  
ATOM     26  H3' DG5 A   1     -64.085 -23.865   9.100  3.00  0.00           H  
ATOM     27  H22 DG5 A   1     -56.909 -21.388  10.670  9.00  0.00           H  
ATOM     28  H4' DG5 A   1     -62.755 -21.744   9.940  7.00  0.00           H  
ATOM     29  H5' DG5 A   1     -64.077 -21.722  12.010  6.00  0.00           H  
ATOM     30 H2'' DG5 A   1     -61.941 -25.745   9.350  8.00  0.00           H  
ATOM     31 H5'' DG5 A   1     -65.129 -22.246  10.480  6.00  0.00           H  
ATOM     32  P    DG A   2     -63.033 -23.685   6.790  7.00  0.00           P  
ATOM     33  C5'  DG A   2     -61.860 -21.427   5.950  0.00  0.00           C  
ATOM     34  O5'  DG A   2     -61.966 -22.829   5.900  2.00  0.00           O  
ATOM     35  C4'  DG A   2     -60.422 -20.892   5.660  9.00  0.00           C  
ATOM     36  O4'  DG A   2     -59.519 -21.160   6.650  4.00  0.00           O  
ATOM     37  C3'  DG A   2     -59.806 -21.338   4.310  2.00  0.00           C  
ATOM     38  O3'  DG A   2     -58.997 -20.309   3.750  2.00  0.00           O  
ATOM     39  C2'  DG A   2     -59.036 -22.556   4.870  0.00  0.00           C  
ATOM     40  C1'  DG A   2     -58.523 -22.046   6.200  5.00  0.00           C  
ATOM     41  N1   DG A   2     -55.444 -24.371   9.640  1.00  0.00           N  
ATOM     42  C2   DG A   2     -55.219 -23.266   8.870  1.00  0.00           C  
ATOM     43  N2   DG A   2     -54.055 -22.715   8.890  0.00  0.00           N  
ATOM     44  N3   DG A   2     -56.129 -22.665   8.050  0.00  0.00           N  
ATOM     45  C4   DG A   2     -57.252 -23.362   7.990  6.00  0.00           C  
ATOM     46  C5   DG A   2     -57.525 -24.544   8.680  2.00  0.00           C  
ATOM     47  C6   DG A   2     -56.548 -25.167   9.530  0.00  0.00           C  
ATOM     48  O6   DG A   2     -56.533 -26.259  10.100  0.00  0.00           O  
ATOM     49  N7   DG A   2     -58.820 -25.026   8.410  8.00  0.00           N  
ATOM     50  C8   DG A   2     -59.289 -24.115   7.600  4.00  0.00           C  
ATOM     51  N9   DG A   2     -58.384 -23.130   7.220  8.00  0.00           N  
ATOM     52  OP1  DG A   2     -64.294 -22.984   6.790  0.00  0.00           O  
ATOM     53  OP2  DG A   2     -62.941 -25.128   6.370  3.00  0.00           O1-
ATOM     54  H1   DG A   2     -54.645 -24.810  10.050  0.00  0.00           H  
ATOM     55  H8   DG A   2     -60.301 -24.087   7.320  0.00  0.00           H  
ATOM     56  H1'  DG A   2     -57.542 -21.464   6.030  7.00  0.00           H  
ATOM     57  H2'  DG A   2     -59.715 -23.365   4.930  4.00  0.00           H  
ATOM     58  H21  DG A   2     -53.256 -22.916   9.410  0.00  0.00           H  
ATOM     59  H3'  DG A   2     -60.524 -21.633   3.560  7.00  0.00           H  
ATOM     60  H22  DG A   2     -53.939 -21.993   8.180  9.00  0.00           H  
ATOM     61  H4'  DG A   2     -60.538 -19.808   5.580  1.00  0.00           H  
ATOM     62  H5'  DG A   2     -62.149 -21.125   6.970  9.00  0.00           H  
ATOM     63 H2''  DG A   2     -58.237 -22.837   4.220  6.00  0.00           H  
ATOM     64 H5''  DG A   2     -62.565 -21.015   5.190  6.00  0.00           H  
ATOM     65  P    DG A   3     -58.144 -20.342   2.400  1.00  0.00           P  
ATOM     66  C5'  DG A   3     -55.976 -20.328   3.870  2.00  0.00           C  
ATOM     67  O5'  DG A   3     -56.765 -21.031   2.930  3.00  0.00           O  
ATOM     68  C4'  DG A   3     -54.731 -21.125   4.300  9.00  0.00           C  
ATOM     69  O4'  DG A   3     -55.073 -22.142   5.280  8.00  0.00           O  
ATOM     70  C3'  DG A   3     -54.055 -21.872   3.170  0.00  0.00           C  
ATOM     71  O3'  DG A   3     -52.615 -21.706   3.400  5.00  0.00           O  
ATOM     72  C2'  DG A   3     -54.521 -23.294   3.310  8.00  0.00           C  
ATOM     73  C1'  DG A   3     -54.418 -23.364   4.870  2.00  0.00           C  
ATOM     74  N1   DG A   3     -53.467 -27.545   7.670  2.00  0.00           N  
ATOM     75  C2   DG A   3     -52.610 -26.575   7.300  6.00  0.00           C  
ATOM     76  N2   DG A   3     -51.307 -26.662   7.510  1.00  0.00           N  
ATOM     77  N3   DG A   3     -52.962 -25.487   6.530  0.00  0.00           N  
ATOM     78  C4   DG A   3     -54.277 -25.570   6.160  8.00  0.00           C  
ATOM     79  C5   DG A   3     -55.255 -26.534   6.500  0.00  0.00           C  
ATOM     80  C6   DG A   3     -54.766 -27.664   7.230  8.00  0.00           C  
ATOM     81  O6   DG A   3     -55.396 -28.651   7.740  7.00  0.00           O  
ATOM     82  N7   DG A   3     -56.468 -26.176   5.980  2.00  0.00           N  
ATOM     83  C8   DG A   3     -56.258 -25.017   5.500  2.00  0.00           C  
ATOM     84  N9   DG A   3     -54.971 -24.571   5.500  9.00  0.00           N  
ATOM     85  OP1  DG A   3     -57.808 -18.962   1.950  5.00  0.00           O  
ATOM     86  OP2  DG A   3     -58.820 -21.261   1.480  3.00  0.00           O1-
ATOM     87  H1   DG A   3     -53.093 -28.272   8.300  8.00  0.00           H  
ATOM     88  H8   DG A   3     -57.065 -24.459   5.040  4.00  0.00           H  
ATOM     89  H1'  DG A   3     -53.390 -23.300   5.140  7.00  0.00           H  
ATOM     90  H2'  DG A   3     -55.566 -23.455   2.980  3.00  0.00           H  
ATOM     91  H21  DG A   3     -50.914 -27.414   8.100  3.00  0.00           H  
ATOM     92  H3'  DG A   3     -54.355 -21.367   2.300  2.00  0.00           H  
ATOM     93  H22  DG A   3     -50.759 -25.973   6.990  3.00  0.00           H  
ATOM     94  H4'  DG A   3     -54.045 -20.340   4.710  0.00  0.00           H  
ATOM     95  H5'  DG A   3     -56.543 -20.170   4.790  6.00  0.00           H  
ATOM     96 H2''  DG A   3     -53.985 -24.076   2.780  3.00  0.00           H  
ATOM     97 H5''  DG A   3     -55.604 -19.401   3.410  0.00  0.00           H  
ATOM     98  P    DT A   4     -51.475 -22.171   2.380  4.00  0.00           P  
ATOM     99  C5'  DT A   4     -49.917 -23.544   4.020  7.00  0.00           C  
ATOM    100  O5'  DT A   4     -50.844 -23.618   2.950  4.00  0.00           O  
ATOM    101  C4'  DT A   4     -49.290 -24.833   4.340  4.00  0.00           C  
ATOM    102  O4'  DT A   4     -50.154 -25.799   4.910  4.00  0.00           O  
ATOM    103  C3'  DT A   4     -48.470 -25.466   3.270  9.00  0.00           C  
ATOM    104  O3'  DT A   4     -47.186 -25.646   3.700  4.00  0.00           O  
ATOM    105  C2'  DT A   4     -49.180 -26.817   3.010  8.00  0.00           C  
ATOM    106  C1'  DT A   4     -49.761 -27.038   4.450  4.00  0.00           C  
ATOM    107  N1   DT A   4     -50.926 -27.953   4.480  5.00  0.00           N  
ATOM    108  C2   DT A   4     -50.924 -29.098   5.360  7.00  0.00           C  
ATOM    109  O2   DT A   4     -49.874 -29.374   5.970  2.00  0.00           O  
ATOM    110  N3   DT A   4     -52.012 -29.943   5.320  9.00  0.00           N  
ATOM    111  C4   DT A   4     -53.174 -29.620   4.700  3.00  0.00           C  
ATOM    112  O4   DT A   4     -54.148 -30.340   4.960  6.00  0.00           O  
ATOM    113  C5   DT A   4     -53.150 -28.441   3.860  4.00  0.00           C  
ATOM    114  C6   DT A   4     -52.045 -27.664   3.720  6.00  0.00           C  
ATOM    115  C7   DT A   4     -54.440 -28.017   3.160  2.00  0.00           C  
ATOM    116  OP1  DT A   4     -50.455 -21.145   2.490  2.00  0.00           O  
ATOM    117  OP2  DT A   4     -52.114 -22.546   1.090  7.00  0.00           O1-
ATOM    118  H3   DT A   4     -51.939 -30.883   5.720  0.00  0.00           H  
ATOM    119  H6   DT A   4     -52.033 -26.739   3.150  7.00  0.00           H  
ATOM    120  H1'  DT A   4     -48.870 -27.292   4.990  9.00  0.00           H  
ATOM    121  H2'  DT A   4     -49.848 -26.570   2.190  3.00  0.00           H  
ATOM    122  H3'  DT A   4     -48.439 -24.773   2.370  2.00  0.00           H  
ATOM    123  H4'  DT A   4     -48.548 -24.648   5.150  4.00  0.00           H  
ATOM    124  H5'  DT A   4     -50.432 -23.020   4.840  0.00  0.00           H  
ATOM    125  H71  DT A   4     -54.911 -28.918   2.790  5.00  0.00           H  
ATOM    126  H72  DT A   4     -55.198 -27.656   3.900  6.00  0.00           H  
ATOM    127  H73  DT A   4     -54.292 -27.289   2.320  8.00  0.00           H  
ATOM    128 H2''  DT A   4     -48.544 -27.692   2.870  5.00  0.00           H  
ATOM    129 H5''  DT A   4     -49.135 -22.872   3.690  2.00  0.00           H  
ATOM    130  P    DT A   5     -45.892 -25.852   2.770  8.00  0.00           P  
ATOM    131  C5'  DT A   5     -45.593 -28.366   3.570  7.00  0.00           C  
ATOM    132  O5'  DT A   5     -46.029 -27.486   2.500  6.00  0.00           O  
ATOM    133  C4'  DT A   5     -46.052 -29.843   3.390  1.00  0.00           C  
ATOM    134  O4'  DT A   5     -47.517 -29.984   3.500  3.00  0.00           O  
ATOM    135  C3'  DT A   5     -45.612 -30.478   2.080  3.00  0.00           C  
ATOM    136  O3'  DT A   5     -45.060 -31.686   2.280  6.00  0.00           O  
ATOM    137  C2'  DT A   5     -46.950 -30.724   1.340  5.00  0.00           C  
ATOM    138  C1'  DT A   5     -47.795 -31.026   2.600  2.00  0.00           C  
ATOM    139  N1   DT A   5     -49.292 -31.143   2.400  0.00  0.00           N  
ATOM    140  C2   DT A   5     -49.901 -32.227   3.070  3.00  0.00           C  
ATOM    141  O2   DT A   5     -49.355 -32.973   3.890  0.00  0.00           O  
ATOM    142  N3   DT A   5     -51.282 -32.339   2.890  5.00  0.00           N  
ATOM    143  C4   DT A   5     -52.011 -31.437   2.160  5.00  0.00           C  
ATOM    144  O4   DT A   5     -53.168 -31.809   1.870  8.00  0.00           O  
ATOM    145  C5   DT A   5     -51.314 -30.354   1.510  1.00  0.00           C  
ATOM    146  C6   DT A   5     -50.001 -30.212   1.720  3.00  0.00           C  
ATOM    147  C7   DT A   5     -52.071 -29.294   0.630  4.00  0.00           C  
ATOM    148  OP1  DT A   5     -44.658 -25.538   3.600  3.00  0.00           O  
ATOM    149  OP2  DT A   5     -46.130 -25.205   1.450  4.00  0.00           O1-
ATOM    150  H3   DT A   5     -51.793 -33.106   3.240  6.00  0.00           H  
ATOM    151  H6   DT A   5     -49.498 -29.505   1.160  5.00  0.00           H  
ATOM    152  H1'  DT A   5     -47.409 -32.000   2.960  9.00  0.00           H  
ATOM    153  H2'  DT A   5     -47.250 -29.754   0.870  3.00  0.00           H  
ATOM    154  H3'  DT A   5     -45.060 -29.750   1.480  1.00  0.00           H  
ATOM    155  H4'  DT A   5     -45.581 -30.415   4.170  9.00  0.00           H  
ATOM    156  H5'  DT A   5     -46.052 -27.986   4.550  1.00  0.00           H  
ATOM    157  H71  DT A   5     -52.214 -29.597  -0.360  9.00  0.00           H  
ATOM    158  H72  DT A   5     -53.074 -29.000   0.990  2.00  0.00           H  
ATOM    159  H73  DT A   5     -51.430 -28.428   0.500  4.00  0.00           H  
ATOM    160 H2''  DT A   5     -47.098 -31.521   0.600  4.00  0.00           H  
ATOM    161 H5''  DT A   5     -44.520 -28.378   3.690  6.00  0.00           H  
ATOM    162  P    DA A   6     -43.624 -32.144   1.810  7.00  0.00           P  
ATOM    163  C5'  DA A   6     -43.316 -34.561   2.780  7.00  0.00           C  
ATOM    164  O5'  DA A   6     -43.928 -33.678   1.890  4.00  0.00           O  
ATOM    165  C4'  DA A   6     -43.813 -36.040   2.690  6.00  0.00           C  
ATOM    166  O4'  DA A   6     -45.241 -36.078   2.900  4.00  0.00           O  
ATOM    167  C3'  DA A   6     -43.509 -36.655   1.340  0.00  0.00           C  
ATOM    168  O3'  DA A   6     -43.311 -38.156   1.440  1.00  0.00           O  
ATOM    169  C2'  DA A   6     -44.662 -36.207   0.480  3.00  0.00           C  
ATOM    170  C1'  DA A   6     -45.865 -36.423   1.530  6.00  0.00           C  
ATOM    171  N1   DA A   6     -51.015 -36.626   1.310  9.00  0.00           N  
ATOM    172  C2   DA A   6     -50.138 -37.483   1.780  7.00  0.00           C  
ATOM    173  N3   DA A   6     -48.774 -37.384   1.800  7.00  0.00           N  
ATOM    174  C4   DA A   6     -48.385 -36.179   1.330  8.00  0.00           C  
ATOM    175  C5   DA A   6     -49.161 -35.180   0.880  5.00  0.00           C  
ATOM    176  C6   DA A   6     -50.565 -35.453   0.920  0.00  0.00           C  
ATOM    177  N6   DA A   6     -51.461 -34.576   0.600  0.00  0.00           N  
ATOM    178  N7   DA A   6     -48.373 -33.976   0.720  1.00  0.00           N  
ATOM    179  C8   DA A   6     -47.173 -34.287   1.080  6.00  0.00           C  
ATOM    180  N9   DA A   6     -47.106 -35.674   1.270  8.00  0.00           N  
ATOM    181  OP1  DA A   6     -42.547 -31.709   2.800  0.00  0.00           O  
ATOM    182  OP2  DA A   6     -43.510 -31.804   0.410  5.00  0.00           O1-
ATOM    183  H2   DA A   6     -50.519 -38.414   2.170  4.00  0.00           H  
ATOM    184  H8   DA A   6     -46.368 -33.598   1.300  6.00  0.00           H  
ATOM    185  H1'  DA A   6     -46.016 -37.511   1.430  0.00  0.00           H  
ATOM    186  H2'  DA A   6     -44.600 -35.172   0.140  4.00  0.00           H  
ATOM    187  H3'  DA A   6     -42.652 -36.190   0.940  4.00  0.00           H  
ATOM    188  H4'  DA A   6     -43.385 -36.522   3.530  5.00  0.00           H  
ATOM    189  H5'  DA A   6     -43.459 -34.258   3.720  9.00  0.00           H  
ATOM    190  H61  DA A   6     -52.348 -34.970   0.480  6.00  0.00           H  
ATOM    191  H62  DA A   6     -51.243 -33.715   0.160  6.00  0.00           H  
ATOM    192 H2''  DA A   6     -44.698 -36.762  -0.420  9.00  0.00           H  
ATOM    193 H5''  DA A   6     -42.258 -34.499   2.700  0.00  0.00           H  
ATOM    194  P    DG A   7     -42.860 -39.045   0.110  6.00  0.00           P  
ATOM    195  C5'  DG A   7     -45.029 -40.602   0.240  3.00  0.00           C  
ATOM    196  O5'  DG A   7     -44.193 -39.764  -0.540  8.00  0.00           O  
ATOM    197  C4'  DG A   7     -46.306 -40.974  -0.460  9.00  0.00           C  
ATOM    198  O4'  DG A   7     -47.244 -39.863  -0.350  6.00  0.00           O  
ATOM    199  C3'  DG A   7     -46.012 -41.254  -1.920  7.00  0.00           C  
ATOM    200  O3'  DG A   7     -46.802 -42.289  -2.400  1.00  0.00           O  
ATOM    201  C2'  DG A   7     -46.498 -39.926  -2.580  4.00  0.00           C  
ATOM    202  C1'  DG A   7     -47.747 -39.651  -1.680  0.00  0.00           C  
ATOM    203  N1   DG A   7     -52.119 -37.151  -1.870  7.00  0.00           N  
ATOM    204  C2   DG A   7     -51.913 -38.472  -1.680  9.00  0.00           C  
ATOM    205  N2   DG A   7     -52.912 -39.216  -1.330  6.00  0.00           N  
ATOM    206  N3   DG A   7     -50.684 -38.975  -1.620  4.00  0.00           N  
ATOM    207  C4   DG A   7     -49.676 -38.064  -1.820  5.00  0.00           C  
ATOM    208  C5   DG A   7     -49.738 -36.723  -2.010  5.00  0.00           C  
ATOM    209  C6   DG A   7     -51.113 -36.235  -2.090  8.00  0.00           C  
ATOM    210  O6   DG A   7     -51.492 -35.110  -2.290  9.00  0.00           O  
ATOM    211  N7   DG A   7     -48.448 -36.195  -2.270  2.00  0.00           N  
ATOM    212  C8   DG A   7     -47.678 -37.166  -2.120  4.00  0.00           C  
ATOM    213  N9   DG A   7     -48.300 -38.367  -1.900  3.00  0.00           N  
ATOM    214  OP1  DG A   7     -42.029 -40.220   0.570  6.00  0.00           O  
ATOM    215  OP2  DG A   7     -42.255 -38.152  -0.910  6.00  0.00           O1-
ATOM    216  H1   DG A   7     -53.093 -36.833  -1.850  2.00  0.00           H  
ATOM    217  H8   DG A   7     -46.609 -37.165  -2.340  9.00  0.00           H  
ATOM    218  H1'  DG A   7     -48.476 -40.347  -1.920  2.00  0.00           H  
ATOM    219  H2'  DG A   7     -45.684 -39.136  -2.430  6.00  0.00           H  
ATOM    220  H21  DG A   7     -53.842 -38.940  -1.340  2.00  0.00           H  
ATOM    221  H3'  DG A   7     -44.930 -41.437  -2.150  7.00  0.00           H  
ATOM    222  H22  DG A   7     -52.748 -40.128  -1.000  2.00  0.00           H  
ATOM    223  H4'  DG A   7     -46.773 -41.900  -0.080  9.00  0.00           H  
ATOM    224  H5'  DG A   7     -45.428 -40.146   1.130  1.00  0.00           H  
ATOM    225 H2''  DG A   7     -46.607 -39.998  -3.640  9.00  0.00           H  
ATOM    226 H5''  DG A   7     -44.495 -41.516   0.440  9.00  0.00           H  
ATOM    227  P    DG A   8     -46.323 -43.560  -3.270  5.00  0.00           P  
ATOM    228  C5'  DG A   8     -48.348 -44.984  -2.400  4.00  0.00           C  
ATOM    229  O5'  DG A   8     -47.701 -44.294  -3.450  8.00  0.00           O  
ATOM    230  C4'  DG A   8     -49.872 -45.194  -2.450  7.00  0.00           C  
ATOM    231  O4'  DG A   8     -50.581 -43.988  -2.450  5.00  0.00           O  
ATOM    232  C3'  DG A   8     -50.474 -45.861  -3.700  8.00  0.00           C  
ATOM    233  O3'  DG A   8     -51.820 -46.521  -3.550  8.00  0.00           O  
ATOM    234  C2'  DG A   8     -50.572 -44.673  -4.720  9.00  0.00           C  
ATOM    235  C1'  DG A   8     -51.185 -43.672  -3.710  3.00  0.00           C  
ATOM    236  N1   DG A   8     -52.768 -39.034  -5.130  8.00  0.00           N  
ATOM    237  C2   DG A   8     -53.454 -40.153  -4.880  2.00  0.00           C  
ATOM    238  N2   DG A   8     -54.744 -40.098  -4.970  7.00  0.00           N  
ATOM    239  N3   DG A   8     -52.910 -41.278  -4.470  4.00  0.00           N  
ATOM    240  C4   DG A   8     -51.545 -41.187  -4.440  4.00  0.00           C  
ATOM    241  C5   DG A   8     -50.723 -40.132  -4.770  5.00  0.00           C  
ATOM    242  C6   DG A   8     -51.415 -38.918  -5.130  0.00  0.00           C  
ATOM    243  O6   DG A   8     -50.957 -37.851  -5.520  1.00  0.00           O  
ATOM    244  N7   DG A   8     -49.401 -40.437  -4.580  7.00  0.00           N  
ATOM    245  C8   DG A   8     -49.481 -41.734  -4.300  7.00  0.00           C  
ATOM    246  N9   DG A   8     -50.752 -42.250  -4.110  5.00  0.00           N  
ATOM    247  OP1  DG A   8     -45.459 -44.431  -2.410  0.00  0.00           O  
ATOM    248  OP2  DG A   8     -45.811 -43.231  -4.600  8.00  0.00           O1-
ATOM    249  H1   DG A   8     -53.256 -38.161  -5.270  0.00  0.00           H  
ATOM    250  H8   DG A   8     -48.616 -42.301  -4.100  2.00  0.00           H  
ATOM    251  H1'  DG A   8     -52.255 -43.889  -3.630  6.00  0.00           H  
ATOM    252  H2'  DG A   8     -49.581 -44.442  -5.200  5.00  0.00           H  
ATOM    253  H21  DG A   8     -55.229 -39.340  -5.360  0.00  0.00           H  
ATOM    254  H3'  DG A   8     -49.677 -46.577  -4.060  0.00  0.00           H  
ATOM    255  H22  DG A   8     -55.339 -40.914  -4.760  0.00  0.00           H  
ATOM    256  H4'  DG A   8     -50.119 -45.849  -1.600  1.00  0.00           H  
ATOM    257  H5'  DG A   8     -48.164 -44.419  -1.480  2.00  0.00           H  
ATOM    258 H2''  DG A   8     -51.356 -44.871  -5.420  7.00  0.00           H  
ATOM    259 H5''  DG A   8     -47.907 -45.900  -2.270  7.00  0.00           H  
ATOM    260  P    DG A   9     -52.353 -47.554  -4.640  2.00  0.00           P  
ATOM    261  C5'  DG A   9     -54.319 -45.990  -5.510  0.00  0.00           C  
ATOM    262  O5'  DG A   9     -53.125 -46.717  -5.740  5.00  0.00           O  
ATOM    263  C4'  DG A   9     -54.677 -45.015  -6.650  3.00  0.00           C  
ATOM    264  O4'  DG A   9     -54.010 -43.736  -6.520  9.00  0.00           O  
ATOM    265  C3'  DG A   9     -54.345 -45.522  -8.100  2.00  0.00           C  
ATOM    266  O3'  DG A   9     -55.605 -45.641  -8.680  4.00  0.00           O  
ATOM    267  C2'  DG A   9     -53.382 -44.455  -8.510  6.00  0.00           C  
ATOM    268  C1'  DG A   9     -53.884 -43.207  -7.800  7.00  0.00           C  
ATOM    269  N1   DG A   9     -53.292 -38.189  -8.860  6.00  0.00           N  
ATOM    270  C2   DG A   9     -54.388 -38.967  -8.930  8.00  0.00           C  
ATOM    271  N2   DG A   9     -55.380 -38.436  -9.560  9.00  0.00           N  
ATOM    272  N3   DG A   9     -54.483 -40.269  -8.630  5.00  0.00           N  
ATOM    273  C4   DG A   9     -53.332 -40.815  -8.250  8.00  0.00           C  
ATOM    274  C5   DG A   9     -52.075 -40.191  -8.300  0.00  0.00           C  
ATOM    275  C6   DG A   9     -52.006 -38.762  -8.640  2.00  0.00           C  
ATOM    276  O6   DG A   9     -51.030 -38.053  -8.690  2.00  0.00           O  
ATOM    277  N7   DG A   9     -51.034 -41.047  -7.930  8.00  0.00           N  
ATOM    278  C8   DG A   9     -51.642 -42.126  -7.680  0.00  0.00           C  
ATOM    279  N9   DG A   9     -53.006 -42.072  -7.800  4.00  0.00           N  
ATOM    280  OP1  DG A   9     -53.357 -48.330  -3.850  4.00  0.00           O  
ATOM    281  OP2  DG A   9     -51.201 -48.263  -5.230  3.00  0.00           O1-
ATOM    282  H1   DG A   9     -53.230 -37.234  -9.290  3.00  0.00           H  
ATOM    283  H8   DG A   9     -51.086 -42.927  -7.240  0.00  0.00           H  
ATOM    284  H1'  DG A   9     -54.886 -42.906  -8.200  2.00  0.00           H  
ATOM    285  H2'  DG A   9     -52.376 -44.568  -8.050  8.00  0.00           H  
ATOM    286  H21  DG A   9     -55.255 -37.560 -10.010  6.00  0.00           H  
ATOM    287  H3'  DG A   9     -53.773 -46.431  -8.090  3.00  0.00           H  
ATOM    288  H22  DG A   9     -56.201 -38.977  -9.710  3.00  0.00           H  
ATOM    289  H4'  DG A   9     -55.746 -44.866  -6.640  6.00  0.00           H  
ATOM    290  H5'  DG A   9     -54.262 -45.432  -4.540  7.00  0.00           H  
ATOM    291 H2''  DG A   9     -53.404 -44.369  -9.570  0.00  0.00           H  
ATOM    292 H5''  DG A   9     -55.112 -46.675  -5.380  1.00  0.00           H  
ATOM    293  P    DT A  10     -55.787 -46.213 -10.220  2.00  0.00           P  
ATOM    294  C5'  DT A  10     -57.263 -44.022 -10.880  9.00  0.00           C  
ATOM    295  O5'  DT A  10     -56.030 -44.783 -11.000  0.00  0.00           O  
ATOM    296  C4'  DT A  10     -57.288 -42.705 -11.650  5.00  0.00           C  
ATOM    297  O4'  DT A  10     -56.131 -41.880 -11.270  4.00  0.00           O  
ATOM    298  C3'  DT A  10     -57.128 -42.884 -13.110  1.00  0.00           C  
ATOM    299  O3'  DT A  10     -57.990 -42.104 -13.890  1.00  0.00           O  
ATOM    300  C2'  DT A  10     -55.653 -42.481 -13.400  3.00  0.00           C  
ATOM    301  C1'  DT A  10     -55.574 -41.311 -12.390  5.00  0.00           C  
ATOM    302  N1   DT A  10     -54.238 -40.815 -12.070  8.00  0.00           N  
ATOM    303  C2   DT A  10     -53.890 -39.505 -12.280  6.00  0.00           C  
ATOM    304  O2   DT A  10     -54.759 -38.658 -12.520  4.00  0.00           O  
ATOM    305  N3   DT A  10     -52.570 -39.127 -12.040  2.00  0.00           N  
ATOM    306  C4   DT A  10     -51.527 -39.957 -11.760  4.00  0.00           C  
ATOM    307  O4   DT A  10     -50.405 -39.508 -11.650  2.00  0.00           O  
ATOM    308  C5   DT A  10     -51.932 -41.402 -11.710  6.00  0.00           C  
ATOM    309  C6   DT A  10     -53.220 -41.750 -11.810  7.00  0.00           C  
ATOM    310  C7   DT A  10     -50.984 -42.567 -11.490  0.00  0.00           C  
ATOM    311  OP1  DT A  10     -56.997 -47.047 -10.330  6.00  0.00           O  
ATOM    312  OP2  DT A  10     -54.522 -46.799 -10.610  6.00  0.00           O1-
ATOM    313  H3   DT A  10     -52.396 -38.103 -12.070  5.00  0.00           H  
ATOM    314  H6   DT A  10     -53.526 -42.814 -11.700  7.00  0.00           H  
ATOM    315  H1'  DT A  10     -56.225 -40.583 -12.920  3.00  0.00           H  
ATOM    316  H2'  DT A  10     -55.008 -43.264 -13.270  3.00  0.00           H  
ATOM    317  H3'  DT A  10     -57.247 -43.884 -13.390  7.00  0.00           H  
ATOM    318  H4'  DT A  10     -58.203 -42.152 -11.480  5.00  0.00           H  
ATOM    319  H5'  DT A  10     -57.296 -43.896  -9.810  4.00  0.00           H  
ATOM    320  H71  DT A  10     -50.975 -43.274 -12.280  4.00  0.00           H  
ATOM    321  H72  DT A  10     -50.079 -42.068 -11.170  5.00  0.00           H  
ATOM    322  H73  DT A  10     -51.292 -43.075 -10.620  4.00  0.00           H  
ATOM    323 H2''  DT A  10     -55.546 -41.957 -14.360  8.00  0.00           H  
ATOM    324 H5''  DT A  10     -58.048 -44.659 -11.330  7.00  0.00           H  
ATOM    325  P    DT A  11     -58.074 -41.980 -15.540  5.00  0.00           P  
ATOM    326  C5'  DT A  11     -57.596 -39.425 -15.490  6.00  0.00           C  
ATOM    327  O5'  DT A  11     -57.108 -40.716 -15.810  6.00  0.00           O  
ATOM    328  C4'  DT A  11     -56.545 -38.412 -16.120  3.00  0.00           C  
ATOM    329  O4'  DT A  11     -55.272 -38.522 -15.410  7.00  0.00           O  
ATOM    330  C3'  DT A  11     -56.396 -38.588 -17.610  6.00  0.00           C  
ATOM    331  O3'  DT A  11     -56.484 -37.288 -18.200  1.00  0.00           O  
ATOM    332  C2'  DT A  11     -54.988 -39.249 -17.580  1.00  0.00           C  
ATOM    333  C1'  DT A  11     -54.286 -38.518 -16.460  5.00  0.00           C  
ATOM    334  N1   DT A  11     -52.980 -39.060 -16.090  7.00  0.00           N  
ATOM    335  C2   DT A  11     -51.943 -38.151 -16.030  1.00  0.00           C  
ATOM    336  O2   DT A  11     -52.157 -36.947 -16.110  8.00  0.00           O  
ATOM    337  N3   DT A  11     -50.688 -38.699 -15.700  6.00  0.00           N  
ATOM    338  C4   DT A  11     -50.421 -39.967 -15.380  9.00  0.00           C  
ATOM    339  O4   DT A  11     -49.257 -40.253 -15.140  9.00  0.00           O  
ATOM    340  C5   DT A  11     -51.579 -40.823 -15.420  2.00  0.00           C  
ATOM    341  C6   DT A  11     -52.815 -40.419 -15.820  0.00  0.00           C  
ATOM    342  C7   DT A  11     -51.272 -42.294 -15.030  2.00  0.00           C  
ATOM    343  OP1  DT A  11     -59.501 -41.582 -15.790  0.00  0.00           O  
ATOM    344  OP2  DT A  11     -57.528 -43.188 -16.200  5.00  0.00           O1-
ATOM    345  H3   DT A  11     -49.958 -37.933 -15.620  7.00  0.00           H  
ATOM    346  H6   DT A  11     -53.676 -41.069 -15.780  0.00  0.00           H  
ATOM    347  H1'  DT A  11     -54.210 -37.425 -16.730  6.00  0.00           H  
ATOM    348  H2'  DT A  11     -55.150 -40.309 -17.330  2.00  0.00           H  
ATOM    349  H3'  DT A  11     -57.259 -39.143 -17.940  0.00  0.00           H  
ATOM    350  H4'  DT A  11     -57.051 -37.425 -15.960  0.00  0.00           H  
ATOM    351  H5'  DT A  11     -57.619 -39.339 -14.440  7.00  0.00           H  
ATOM    352  H71  DT A  11     -50.575 -42.212 -14.240  7.00  0.00           H  
ATOM    353  H72  DT A  11     -52.211 -42.717 -14.630  0.00  0.00           H  
ATOM    354  H73  DT A  11     -50.878 -42.972 -15.860  3.00  0.00           H  
ATOM    355 H2''  DT A  11     -54.479 -39.203 -18.520  8.00  0.00           H  
ATOM    356 H5''  DT A  11     -58.642 -39.293 -15.780  9.00  0.00           H  
ATOM    357  P    DA A  12     -56.749 -37.172 -19.840  6.00  0.00           P  
ATOM    358  C5'  DA A  12     -56.168 -34.603 -19.990  7.00  0.00           C  
ATOM    359  O5'  DA A  12     -57.069 -35.682 -20.230  5.00  0.00           O  
ATOM    360  C4'  DA A  12     -56.769 -33.288 -20.420  8.00  0.00           C  
ATOM    361  O4'  DA A  12     -55.868 -32.218 -20.120  2.00  0.00           O  
ATOM    362  C3'  DA A  12     -56.969 -33.183 -21.950  9.00  0.00           C  
ATOM    363  O3'  DA A  12     -58.203 -32.503 -22.280  0.00  0.00           O  
ATOM    364  C2'  DA A  12     -55.726 -32.441 -22.340  5.00  0.00           C  
ATOM    365  C1'  DA A  12     -55.578 -31.421 -21.240  6.00  0.00           C  
ATOM    366  N1   DA A  12     -52.844 -26.965 -20.490  0.00  0.00           N  
ATOM    367  C2   DA A  12     -54.141 -27.193 -20.510  8.00  0.00           C  
ATOM    368  N3   DA A  12     -54.799 -28.348 -20.720  9.00  0.00           N  
ATOM    369  C4   DA A  12     -53.937 -29.410 -20.970  3.00  0.00           C  
ATOM    370  C5   DA A  12     -52.521 -29.319 -21.090  8.00  0.00           C  
ATOM    371  C6   DA A  12     -51.999 -28.026 -20.840  3.00  0.00           C  
ATOM    372  N6   DA A  12     -50.735 -27.673 -20.780  1.00  0.00           N  
ATOM    373  N7   DA A  12     -51.999 -30.527 -21.490  4.00  0.00           N  
ATOM    374  C8   DA A  12     -52.974 -31.336 -21.430  8.00  0.00           C  
ATOM    375  N9   DA A  12     -54.192 -30.750 -21.230  6.00  0.00           N  
ATOM    376  OP1  DA A  12     -57.873 -37.954 -20.170  9.00  0.00           O  
ATOM    377  OP2  DA A  12     -55.512 -37.604 -20.560  6.00  0.00           O1-
ATOM    378  H2   DA A  12     -54.826 -26.370 -20.390  7.00  0.00           H  
ATOM    379  H8   DA A  12     -53.052 -32.463 -21.630  4.00  0.00           H  
ATOM    380  H1'  DA A  12     -56.346 -30.659 -21.360  4.00  0.00           H  
ATOM    381  H2'  DA A  12     -54.910 -33.162 -22.250  0.00  0.00           H  
ATOM    382  H3'  DA A  12     -56.881 -34.138 -22.480  6.00  0.00           H  
ATOM    383  H4'  DA A  12     -57.712 -33.195 -19.950  2.00  0.00           H  
ATOM    384  H5'  DA A  12     -55.301 -34.769 -20.570  0.00  0.00           H  
ATOM    385  H61  DA A  12     -50.642 -26.702 -21.050  7.00  0.00           H  
ATOM    386  H62  DA A  12     -50.060 -28.362 -21.100  3.00  0.00           H  
ATOM    387 H2''  DA A  12     -55.627 -32.054 -23.360  4.00  0.00           H  
ATOM    388 H5''  DA A  12     -55.987 -34.546 -18.920  8.00  0.00           H  
ATOM    389  P    DG A  13     -58.657 -32.095 -23.700  1.00  0.00           P  
ATOM    390  C5'  DG A  13     -58.258 -29.497 -23.570  7.00  0.00           C  
ATOM    391  O5'  DG A  13     -58.043 -30.726 -24.190  5.00  0.00           O  
ATOM    392  C4'  DG A  13     -57.638 -28.281 -24.370  3.00  0.00           C  
ATOM    393  O4'  DG A  13     -56.239 -28.267 -23.950  5.00  0.00           O  
ATOM    394  C3'  DG A  13     -57.607 -28.329 -25.860  6.00  0.00           C  
ATOM    395  O3'  DG A  13     -57.597 -26.930 -26.230  8.00  0.00           O  
ATOM    396  C2'  DG A  13     -56.266 -28.945 -26.210  1.00  0.00           C  
ATOM    397  C1'  DG A  13     -55.416 -28.216 -25.160  0.00  0.00           C  
ATOM    398  N1   DG A  13     -50.427 -27.245 -24.800  8.00  0.00           N  
ATOM    399  C2   DG A  13     -51.456 -26.399 -24.950  0.00  0.00           C  
ATOM    400  N2   DG A  13     -51.221 -25.128 -24.880  3.00  0.00           N  
ATOM    401  N3   DG A  13     -52.721 -26.848 -25.100  0.00  0.00           N  
ATOM    402  C4   DG A  13     -52.910 -28.194 -24.990  7.00  0.00           C  
ATOM    403  C5   DG A  13     -51.893 -29.150 -24.780  5.00  0.00           C  
ATOM    404  C6   DG A  13     -50.532 -28.658 -24.740  2.00  0.00           C  
ATOM    405  O6   DG A  13     -49.504 -29.305 -24.650  6.00  0.00           O  
ATOM    406  N7   DG A  13     -52.495 -30.440 -24.790  8.00  0.00           N  
ATOM    407  C8   DG A  13     -53.750 -30.219 -24.990  3.00  0.00           C  
ATOM    408  N9   DG A  13     -54.098 -28.846 -24.990  2.00  0.00           N  
ATOM    409  OP1  DG A  13     -60.093 -31.797 -23.630  3.00  0.00           O  
ATOM    410  OP2  DG A  13     -58.111 -33.046 -24.680  1.00  0.00           O1-
ATOM    411  H1   DG A  13     -49.528 -26.763 -24.650  5.00  0.00           H  
ATOM    412  H8   DG A  13     -54.489 -30.991 -25.050  9.00  0.00           H  
ATOM    413  H1'  DG A  13     -55.314 -27.198 -25.440  6.00  0.00           H  
ATOM    414  H2'  DG A  13     -56.341 -29.999 -26.070  0.00  0.00           H  
ATOM    415  H21  DG A  13     -50.282 -24.873 -24.790  0.00  0.00           H  
ATOM    416  H3'  DG A  13     -58.393 -28.937 -26.310  2.00  0.00           H  
ATOM    417  H22  DG A  13     -51.989 -24.496 -24.930  4.00  0.00           H  
ATOM    418  H4'  DG A  13     -58.121 -27.363 -23.950  4.00  0.00           H  
ATOM    419  H5'  DG A  13     -57.842 -29.375 -22.620  1.00  0.00           H  
ATOM    420 H2''  DG A  13     -55.977 -28.691 -27.310  0.00  0.00           H  
ATOM    421 H5''  DG A  13     -59.318 -29.266 -23.600  3.00  0.00           H  
ATOM    422  P    DG A  14     -57.826 -26.543 -27.710  4.00  0.00           P  
ATOM    423  C5'  DG A  14     -56.258 -26.025 -29.670  0.00  0.00           C  
ATOM    424  O5'  DG A  14     -56.422 -26.578 -28.310  5.00  0.00           O  
ATOM    425  C4'  DG A  14     -54.858 -25.349 -29.930  1.00  0.00           C  
ATOM    426  O4'  DG A  14     -53.869 -26.306 -29.790  3.00  0.00           O  
ATOM    427  C3'  DG A  14     -54.639 -24.139 -29.090  2.00  0.00           C  
ATOM    428  O3'  DG A  14     -54.516 -22.890 -29.910  5.00  0.00           O  
ATOM    429  C2'  DG A  14     -53.232 -24.404 -28.540  7.00  0.00           C  
ATOM    430  C1'  DG A  14     -53.198 -25.990 -28.620  1.00  0.00           C  
ATOM    431  N1   DG A  14     -50.272 -30.265 -28.110  8.00  0.00           N  
ATOM    432  C2   DG A  14     -51.665 -30.082 -28.240  2.00  0.00           C  
ATOM    433  N2   DG A  14     -52.427 -31.170 -28.250  9.00  0.00           N  
ATOM    434  N3   DG A  14     -52.336 -28.947 -28.430  5.00  0.00           N  
ATOM    435  C4   DG A  14     -51.510 -27.902 -28.440  8.00  0.00           C  
ATOM    436  C5   DG A  14     -50.142 -27.877 -28.270  9.00  0.00           C  
ATOM    437  C6   DG A  14     -49.443 -29.183 -28.090  2.00  0.00           C  
ATOM    438  O6   DG A  14     -48.253 -29.329 -27.870  1.00  0.00           O  
ATOM    439  N7   DG A  14     -49.650 -26.565 -28.400  8.00  0.00           N  
ATOM    440  C8   DG A  14     -50.682 -25.870 -28.700  3.00  0.00           C  
ATOM    441  N9   DG A  14     -51.822 -26.589 -28.620  1.00  0.00           N  
ATOM    442  OP1  DG A  14     -58.319 -25.168 -27.670  3.00  0.00           O  
ATOM    443  OP2  DG A  14     -58.701 -27.544 -28.360  3.00  0.00           O1-
ATOM    444  H1   DG A  14     -49.838 -31.154 -27.920  4.00  0.00           H  
ATOM    445  H8   DG A  14     -50.674 -24.783 -28.830  6.00  0.00           H  
ATOM    446  H1'  DG A  14     -53.713 -26.337 -27.760  9.00  0.00           H  
ATOM    447  H2'  DG A  14     -52.638 -23.889 -29.340  4.00  0.00           H  
ATOM    448  H21  DG A  14     -52.056 -32.075 -28.070  2.00  0.00           H  
ATOM    449  H3'  DG A  14     -55.443 -24.160 -28.310  8.00  0.00           H  
ATOM    450  H22  DG A  14     -53.467 -31.078 -28.270  3.00  0.00           H  
ATOM    451  H4'  DG A  14     -54.759 -25.056 -30.980  9.00  0.00           H  
ATOM    452  H5'  DG A  14     -57.028 -25.319 -29.840  0.00  0.00           H  
ATOM    453 H2''  DG A  14     -53.192 -23.944 -27.570  9.00  0.00           H  
ATOM    454 H5''  DG A  14     -56.408 -26.829 -30.300  5.00  0.00           H  
ATOM    455  P    DG A  15     -55.458 -22.375 -31.150  3.00  0.00           P  
ATOM    456  C5'  DG A  15     -54.176 -23.027 -33.240  9.00  0.00           C  
ATOM    457  O5'  DG A  15     -55.219 -23.380 -32.450  9.00  0.00           O  
ATOM    458  C4'  DG A  15     -52.799 -23.053 -32.560  9.00  0.00           C  
ATOM    459  O4'  DG A  15     -52.478 -24.362 -32.090  2.00  0.00           O  
ATOM    460  C3'  DG A  15     -51.635 -22.698 -33.520  1.00  0.00           C  
ATOM    461  O3'  DG A  15     -50.828 -21.643 -33.000  8.00  0.00           O  
ATOM    462  C2'  DG A  15     -50.803 -23.958 -33.560  6.00  0.00           C  
ATOM    463  C1'  DG A  15     -51.150 -24.594 -32.260  1.00  0.00           C  
ATOM    464  N1   DG A  15     -47.220 -27.537 -31.100  9.00  0.00           N  
ATOM    465  C2   DG A  15     -47.175 -26.268 -31.510  5.00  0.00           C  
ATOM    466  N2   DG A  15     -46.044 -25.644 -31.600  0.00  0.00           N  
ATOM    467  N3   DG A  15     -48.288 -25.681 -31.960  4.00  0.00           N  
ATOM    468  C4   DG A  15     -49.416 -26.427 -31.920  5.00  0.00           C  
ATOM    469  C5   DG A  15     -49.550 -27.735 -31.580  5.00  0.00           C  
ATOM    470  C6   DG A  15     -48.331 -28.372 -31.230  3.00  0.00           C  
ATOM    471  O6   DG A  15     -48.035 -29.576 -31.130  3.00  0.00           O  
ATOM    472  N7   DG A  15     -50.881 -28.156 -31.680  1.00  0.00           N  
ATOM    473  C8   DG A  15     -51.546 -27.100 -31.990  3.00  0.00           C  
ATOM    474  N9   DG A  15     -50.756 -26.018 -32.220  0.00  0.00           N  
ATOM    475  OP1  DG A  15     -55.021 -20.966 -31.450  1.00  0.00           O  
ATOM    476  OP2  DG A  15     -56.851 -22.687 -30.700  9.00  0.00           O1-
ATOM    477  H1   DG A  15     -46.314 -28.096 -30.980  3.00  0.00           H  
ATOM    478  H8   DG A  15     -52.603 -26.977 -31.980  1.00  0.00           H  
ATOM    479  H1'  DG A  15     -50.652 -24.229 -31.440  2.00  0.00           H  
ATOM    480  H2'  DG A  15     -51.121 -24.603 -34.350  6.00  0.00           H  
ATOM    481  H21  DG A  15     -45.160 -25.997 -31.270  5.00  0.00           H  
ATOM    482  H3'  DG A  15     -52.029 -22.411 -34.430  2.00  0.00           H  
ATOM    483  H22  DG A  15     -46.019 -24.795 -32.030  9.00  0.00           H  
ATOM    484  H4'  DG A  15     -52.696 -22.385 -31.740  8.00  0.00           H  
ATOM    485  H5'  DG A  15     -54.381 -22.124 -33.810  3.00  0.00           H  
ATOM    486 H2''  DG A  15     -49.766 -23.607 -33.590  7.00  0.00           H  
ATOM    487 H5''  DG A  15     -54.103 -23.750 -34.020  7.00  0.00           H  
ATOM    488  P    DT A  16     -50.207 -20.486 -33.850  5.00  0.00           P  
ATOM    489  C5'  DT A  16     -47.813 -20.053 -34.770  9.00  0.00           C  
ATOM    490  O5'  DT A  16     -48.746 -21.026 -34.200  6.00  0.00           O  
ATOM    491  C4'  DT A  16     -46.296 -20.406 -34.630  5.00  0.00           C  
ATOM    492  O4'  DT A  16     -45.881 -20.390 -33.220  2.00  0.00           O  
ATOM    493  C3'  DT A  16     -45.883 -21.790 -35.170  4.00  0.00           C  
ATOM    494  O3'  DT A  16     -44.503 -21.683 -35.520  3.00  0.00           O  
ATOM    495  C2'  DT A  16     -46.057 -22.580 -33.890  5.00  0.00           C  
ATOM    496  C1'  DT A  16     -45.526 -21.719 -32.810  7.00  0.00           C  
ATOM    497  N1   DT A  16     -46.043 -21.990 -31.430  9.00  0.00           N  
ATOM    498  C2   DT A  16     -45.141 -22.318 -30.410  1.00  0.00           C  
ATOM    499  O2   DT A  16     -43.895 -22.455 -30.510  9.00  0.00           O  
ATOM    500  N3   DT A  16     -45.764 -22.540 -29.190  8.00  0.00           N  
ATOM    501  C4   DT A  16     -47.076 -22.431 -28.890  1.00  0.00           C  
ATOM    502  O4   DT A  16     -47.497 -22.766 -27.780  2.00  0.00           O  
ATOM    503  C5   DT A  16     -47.928 -22.016 -29.980  5.00  0.00           C  
ATOM    504  C6   DT A  16     -47.410 -21.827 -31.220  2.00  0.00           C  
ATOM    505  C7   DT A  16     -49.452 -21.849 -29.740  2.00  0.00           C  
ATOM    506  OP1  DT A  16     -50.084 -19.479 -32.880  0.00  0.00           O  
ATOM    507  OP2  DT A  16     -50.955 -20.278 -35.100  1.00  0.00           O1-
ATOM    508  H3   DT A  16     -45.149 -22.828 -28.450  4.00  0.00           H  
ATOM    509  H6   DT A  16     -48.040 -21.499 -32.050  0.00  0.00           H  
ATOM    510  H1'  DT A  16     -44.454 -21.823 -32.890  5.00  0.00           H  
ATOM    511  H2'  DT A  16     -47.106 -22.817 -33.820  2.00  0.00           H  
ATOM    512  H3'  DT A  16     -46.474 -22.167 -35.940  6.00  0.00           H  
ATOM    513  H4'  DT A  16     -45.765 -19.623 -35.160  1.00  0.00           H  
ATOM    514  H5'  DT A  16     -47.916 -19.052 -34.190  5.00  0.00           H  
ATOM    515  H71  DT A  16     -49.917 -22.683 -29.260  1.00  0.00           H  
ATOM    516  H72  DT A  16     -49.558 -21.147 -28.940  2.00  0.00           H  
ATOM    517  H73  DT A  16     -49.977 -21.635 -30.680  3.00  0.00           H  
ATOM    518 H2''  DT A  16     -45.462 -23.500 -33.910  0.00  0.00           H  
ATOM    519 H5''  DT A  16     -47.924 -19.792 -35.830  2.00  0.00           H  
ATOM    520  P    DT A  17     -43.794 -22.850 -36.430  0.00  0.00           P  
ATOM    521  C5'  DT A  17     -42.759 -24.451 -34.650  3.00  0.00           C  
ATOM    522  O5'  DT A  17     -43.742 -24.214 -35.620  7.00  0.00           O  
ATOM    523  C4'  DT A  17     -42.583 -25.906 -34.330  6.00  0.00           C  
ATOM    524  O4'  DT A  17     -43.780 -26.549 -33.860  6.00  0.00           O  
ATOM    525  C3'  DT A  17     -42.140 -26.832 -35.470  5.00  0.00           C  
ATOM    526  O3'  DT A  17     -41.090 -27.663 -34.920  0.00  0.00           O  
ATOM    527  C2'  DT A  17     -43.421 -27.587 -35.880  9.00  0.00           C  
ATOM    528  C1'  DT A  17     -43.993 -27.777 -34.520  3.00  0.00           C  
ATOM    529  N1   DT A  17     -45.437 -28.041 -34.440  7.00  0.00           N  
ATOM    530  C2   DT A  17     -45.849 -29.322 -34.150  5.00  0.00           C  
ATOM    531  O2   DT A  17     -45.046 -30.197 -34.050  4.00  0.00           O  
ATOM    532  N3   DT A  17     -47.223 -29.575 -34.140  1.00  0.00           N  
ATOM    533  C4   DT A  17     -48.159 -28.734 -34.560  6.00  0.00           C  
ATOM    534  O4   DT A  17     -49.242 -29.270 -34.790  9.00  0.00           O  
ATOM    535  C5   DT A  17     -47.690 -27.349 -34.900  4.00  0.00           C  
ATOM    536  C6   DT A  17     -46.363 -27.086 -34.790  6.00  0.00           C  
ATOM    537  C7   DT A  17     -48.727 -26.376 -35.390  5.00  0.00           C  
ATOM    538  OP1  DT A  17     -42.422 -22.556 -36.800  2.00  0.00           O  
ATOM    539  OP2  DT A  17     -44.800 -23.143 -37.460  5.00  0.00           O1-
ATOM    540  H3   DT A  17     -47.558 -30.475 -33.790  2.00  0.00           H  
ATOM    541  H6   DT A  17     -46.010 -26.074 -35.070  5.00  0.00           H  
ATOM    542  H1'  DT A  17     -43.324 -28.481 -34.050  5.00  0.00           H  
ATOM    543  H2'  DT A  17     -44.120 -26.946 -36.460  8.00  0.00           H  
ATOM    544  H3'  DT A  17     -41.812 -26.290 -36.360  2.00  0.00           H  
ATOM    545  H4'  DT A  17     -41.896 -25.983 -33.510  9.00  0.00           H  
ATOM    546  H5'  DT A  17     -43.081 -24.080 -33.640  6.00  0.00           H  
ATOM    547  H71  DT A  17     -49.259 -26.764 -36.230  8.00  0.00           H  
ATOM    548  H72  DT A  17     -48.098 -25.477 -35.780  5.00  0.00           H  
ATOM    549  H73  DT A  17     -49.458 -26.171 -34.590  8.00  0.00           H  
ATOM    550 H2''  DT A  17     -43.233 -28.510 -36.480  5.00  0.00           H  
ATOM    551 H5''  DT A  17     -41.739 -24.087 -34.940  5.00  0.00           H  
ATOM    552  P    DA A  18     -39.659 -27.705 -35.620  1.00  0.00           P  
ATOM    553  C5'  DA A  18     -38.349 -27.848 -33.270  0.00  0.00           C  
ATOM    554  O5'  DA A  18     -38.652 -28.413 -34.590  9.00  0.00           O  
ATOM    555  C4'  DA A  18     -37.495 -28.684 -32.360  1.00  0.00           C  
ATOM    556  O4'  DA A  18     -37.997 -29.976 -32.120  4.00  0.00           O  
ATOM    557  C3'  DA A  18     -36.127 -28.958 -32.920  8.00  0.00           C  
ATOM    558  O3'  DA A  18     -35.103 -28.994 -31.920  3.00  0.00           O  
ATOM    559  C2'  DA A  18     -36.241 -30.286 -33.570  2.00  0.00           C  
ATOM    560  C1'  DA A  18     -37.134 -31.030 -32.550  0.00  0.00           C  
ATOM    561  N1   DA A  18     -37.301 -36.090 -33.160  4.00  0.00           N  
ATOM    562  C2   DA A  18     -36.512 -35.319 -32.430  7.00  0.00           C  
ATOM    563  N3   DA A  18     -36.598 -33.983 -32.270  5.00  0.00           N  
ATOM    564  C4   DA A  18     -37.549 -33.455 -33.080  2.00  0.00           C  
ATOM    565  C5   DA A  18     -38.280 -34.114 -34.070  1.00  0.00           C  
ATOM    566  C6   DA A  18     -38.131 -35.558 -33.990  9.00  0.00           C  
ATOM    567  N6   DA A  18     -38.691 -36.447 -34.830  8.00  0.00           N  
ATOM    568  N7   DA A  18     -39.078 -33.214 -34.760  6.00  0.00           N  
ATOM    569  C8   DA A  18     -38.824 -32.100 -34.130  7.00  0.00           C  
ATOM    570  N9   DA A  18     -37.825 -32.171 -33.210  4.00  0.00           N  
ATOM    571  OP1  DA A  18     -39.236 -26.316 -35.800  5.00  0.00           O  
ATOM    572  OP2  DA A  18     -39.712 -28.622 -36.770  5.00  0.00           O1-
ATOM    573  H2   DA A  18     -35.825 -35.833 -31.830  0.00  0.00           H  
ATOM    574  H8   DA A  18     -39.121 -31.168 -34.460  5.00  0.00           H  
ATOM    575  H1'  DA A  18     -36.467 -31.378 -31.760  5.00  0.00           H  
ATOM    576  H2'  DA A  18     -36.771 -30.183 -34.530  9.00  0.00           H  
ATOM    577  H3'  DA A  18     -35.913 -28.198 -33.670  8.00  0.00           H  
ATOM    578  H4'  DA A  18     -37.470 -28.201 -31.300  7.00  0.00           H  
ATOM    579  H5'  DA A  18     -39.284 -27.699 -32.810  9.00  0.00           H  
ATOM    580  H61  DA A  18     -38.597 -37.431 -34.630  7.00  0.00           H  
ATOM    581  H62  DA A  18     -39.425 -36.214 -35.510  0.00  0.00           H  
ATOM    582 H2''  DA A  18     -35.290 -30.819 -33.770  3.00  0.00           H  
ATOM    583 H5''  DA A  18     -37.764 -26.853 -33.300  7.00  0.00           H  
ATOM    584  P    DG A  19     -34.502 -27.674 -31.410  5.00  0.00           P  
ATOM    585  C5'  DG A  19     -35.965 -25.379 -31.350  6.00  0.00           C  
ATOM    586  O5'  DG A  19     -35.638 -26.658 -30.860  3.00  0.00           O  
ATOM    587  C4'  DG A  19     -37.158 -24.797 -30.660  6.00  0.00           C  
ATOM    588  O4'  DG A  19     -38.458 -25.271 -31.200  7.00  0.00           O  
ATOM    589  C3'  DG A  19     -37.297 -24.975 -29.110  8.00  0.00           C  
ATOM    590  O3'  DG A  19     -37.436 -23.705 -28.500  1.00  0.00           O  
ATOM    591  C2'  DG A  19     -38.539 -25.756 -28.960  4.00  0.00           C  
ATOM    592  C1'  DG A  19     -39.357 -25.145 -30.090  1.00  0.00           C  
ATOM    593  N1   DG A  19     -42.481 -29.343 -30.800  2.00  0.00           N  
ATOM    594  C2   DG A  19     -41.142 -29.321 -30.740  4.00  0.00           C  
ATOM    595  N2   DG A  19     -40.629 -30.570 -30.850  3.00  0.00           N  
ATOM    596  N3   DG A  19     -40.409 -28.214 -30.420  5.00  0.00           N  
ATOM    597  C4   DG A  19     -41.140 -27.039 -30.340  8.00  0.00           C  
ATOM    598  C5   DG A  19     -42.522 -27.012 -30.560  3.00  0.00           C  
ATOM    599  C6   DG A  19     -43.253 -28.207 -30.700  7.00  0.00           C  
ATOM    600  O6   DG A  19     -44.471 -28.363 -30.940  1.00  0.00           O  
ATOM    601  N7   DG A  19     -42.974 -25.657 -30.610  4.00  0.00           N  
ATOM    602  C8   DG A  19     -41.863 -24.948 -30.450  9.00  0.00           C  
ATOM    603  N9   DG A  19     -40.712 -25.692 -30.310  6.00  0.00           N  
ATOM    604  OP1  DG A  19     -33.840 -26.990 -32.530  3.00  0.00           O  
ATOM    605  OP2  DG A  19     -33.686 -28.068 -30.250  3.00  0.00           O1-
ATOM    606  H1   DG A  19     -42.976 -30.071 -31.060  0.00  0.00           H  
ATOM    607  H8   DG A  19     -41.869 -23.872 -30.340  2.00  0.00           H  
ATOM    608  H1'  DG A  19     -39.494 -24.055 -29.880  9.00  0.00           H  
ATOM    609  H2'  DG A  19     -38.257 -26.763 -29.180  2.00  0.00           H  
ATOM    610  H21  DG A  19     -41.157 -31.383 -31.070  4.00  0.00           H  
ATOM    611  H3'  DG A  19     -36.364 -25.454 -28.700  3.00  0.00           H  
ATOM    612  H22  DG A  19     -39.622 -30.576 -31.020  2.00  0.00           H  
ATOM    613  H4'  DG A  19     -37.040 -23.759 -30.870  6.00  0.00           H  
ATOM    614  H5'  DG A  19     -36.155 -25.382 -32.380  0.00  0.00           H  
ATOM    615 H2''  DG A  19     -39.042 -25.687 -27.960  6.00  0.00           H  
ATOM    616 H5''  DG A  19     -35.164 -24.723 -31.310  5.00  0.00           H  
ATOM    617  P    DG A  20     -37.080 -23.431 -27.010  6.00  0.00           P  
ATOM    618  C5'  DG A  20     -39.430 -23.069 -25.750  2.00  0.00           C  
ATOM    619  O5'  DG A  20     -38.319 -23.853 -26.110  9.00  0.00           O  
ATOM    620  C4'  DG A  20     -40.360 -22.726 -26.930  2.00  0.00           C  
ATOM    621  O4'  DG A  20     -40.854 -23.875 -27.590  8.00  0.00           O  
ATOM    622  C3'  DG A  20     -41.522 -21.911 -26.280  5.00  0.00           C  
ATOM    623  O3'  DG A  20     -42.025 -20.972 -27.260  2.00  0.00           O  
ATOM    624  C2'  DG A  20     -42.475 -23.056 -26.120  3.00  0.00           C  
ATOM    625  C1'  DG A  20     -42.181 -23.992 -27.280  4.00  0.00           C  
ATOM    626  N1   DG A  20     -45.811 -27.498 -27.470  7.00  0.00           N  
ATOM    627  C2   DG A  20     -45.935 -26.169 -27.410  4.00  0.00           C  
ATOM    628  N2   DG A  20     -47.094 -25.662 -27.540  7.00  0.00           N  
ATOM    629  N3   DG A  20     -44.933 -25.242 -27.270  3.00  0.00           N  
ATOM    630  C4   DG A  20     -43.744 -25.946 -27.010  5.00  0.00           C  
ATOM    631  C5   DG A  20     -43.507 -27.299 -26.980  2.00  0.00           C  
ATOM    632  C6   DG A  20     -44.625 -28.138 -27.200  2.00  0.00           C  
ATOM    633  O6   DG A  20     -44.678 -29.347 -27.240  0.00  0.00           O  
ATOM    634  N7   DG A  20     -42.229 -27.618 -26.760  3.00  0.00           N  
ATOM    635  C8   DG A  20     -41.666 -26.445 -26.630  6.00  0.00           C  
ATOM    636  N9   DG A  20     -42.475 -25.384 -26.840  8.00  0.00           N  
ATOM    637  OP1  DG A  20     -36.842 -21.983 -26.970  2.00  0.00           O  
ATOM    638  OP2  DG A  20     -35.937 -24.313 -26.610  4.00  0.00           O1-
ATOM    639  H1   DG A  20     -46.641 -27.996 -27.550  2.00  0.00           H  
ATOM    640  H8   DG A  20     -40.675 -26.298 -26.330  2.00  0.00           H  
ATOM    641  H1'  DG A  20     -42.823 -23.732 -28.120  0.00  0.00           H  
ATOM    642  H2'  DG A  20     -42.273 -23.418 -25.130  0.00  0.00           H  
ATOM    643  H21  DG A  20     -47.899 -26.220 -27.690  8.00  0.00           H  
ATOM    644  H3'  DG A  20     -41.250 -21.336 -25.310  2.00  0.00           H  
ATOM    645  H22  DG A  20     -47.106 -24.594 -27.540  9.00  0.00           H  
ATOM    646  H4'  DG A  20     -39.781 -22.032 -27.560  4.00  0.00           H  
ATOM    647  H5'  DG A  20     -39.145 -22.209 -25.130  6.00  0.00           H  
ATOM    648 H2''  DG A  20     -43.546 -22.669 -26.250  9.00  0.00           H  
ATOM    649 H5''  DG A  20     -40.000 -23.675 -24.980  4.00  0.00           H  
ATOM    650  P    DG A  21     -43.224 -19.971 -27.010  0.00  0.00           P  
ATOM    651  C5'  DG A  21     -43.775 -18.635 -24.800  5.00  0.00           C  
ATOM    652  O5'  DG A  21     -43.307 -19.821 -25.440  7.00  0.00           O  
ATOM    653  C4'  DG A  21     -44.076 -18.771 -23.300  4.00  0.00           C  
ATOM    654  O4'  DG A  21     -45.344 -19.428 -23.120  7.00  0.00           O  
ATOM    655  C3'  DG A  21     -43.162 -19.566 -22.440  5.00  0.00           C  
ATOM    656  O3'  DG A  21     -43.284 -19.118 -21.130  8.00  0.00           O  
ATOM    657  C2'  DG A  21     -43.758 -20.988 -22.490  2.00  0.00           C  
ATOM    658  C1'  DG A  21     -45.244 -20.645 -22.460  0.00  0.00           C  
ATOM    659  N1   DG A  21     -46.299 -25.427 -24.020  7.00  0.00           N  
ATOM    660  C2   DG A  21     -45.130 -24.934 -23.600  7.00  0.00           C  
ATOM    661  N2   DG A  21     -44.076 -25.718 -23.580  4.00  0.00           N  
ATOM    662  N3   DG A  21     -44.929 -23.703 -23.340  5.00  0.00           N  
ATOM    663  C4   DG A  21     -46.056 -22.903 -23.380  6.00  0.00           C  
ATOM    664  C5   DG A  21     -47.348 -23.321 -23.720  9.00  0.00           C  
ATOM    665  C6   DG A  21     -47.506 -24.748 -24.040  3.00  0.00           C  
ATOM    666  O6   DG A  21     -48.481 -25.384 -24.360  4.00  0.00           O  
ATOM    667  N7   DG A  21     -48.285 -22.261 -23.660  2.00  0.00           N  
ATOM    668  C8   DG A  21     -47.540 -21.264 -23.250  0.00  0.00           C  
ATOM    669  N9   DG A  21     -46.183 -21.580 -23.030  6.00  0.00           N  
ATOM    670  OP1  DG A  21     -44.516 -20.583 -27.470  4.00  0.00           O  
ATOM    671  OP2  DG A  21     -42.725 -18.705 -27.670  6.00  0.00           O1-
ATOM    672  H1   DG A  21     -46.274 -26.381 -24.140  0.00  0.00           H  
ATOM    673  H8   DG A  21     -47.899 -20.213 -23.160  7.00  0.00           H  
ATOM    674  H1'  DG A  21     -45.481 -20.537 -21.450  2.00  0.00           H  
ATOM    675  H2'  DG A  21     -43.537 -21.601 -23.350  6.00  0.00           H  
ATOM    676  H21  DG A  21     -44.118 -26.711 -23.690  8.00  0.00           H  
ATOM    677  H3'  DG A  21     -42.111 -19.545 -22.830  3.00  0.00           H  
ATOM    678  H22  DG A  21     -43.126 -25.318 -23.350  2.00  0.00           H  
ATOM    679  H4'  DG A  21     -44.107 -17.768 -22.980  0.00  0.00           H  
ATOM    680  H5'  DG A  21     -44.627 -18.247 -25.390  1.00  0.00           H  
ATOM    681 H2''  DG A  21     -43.343 -21.478 -21.630  8.00  0.00           H  
ATOM    682 H5''  DG A  21     -43.005 -17.875 -24.920  5.00  0.00           H  
ATOM    683  P    DT A  22     -42.169 -19.622 -20.010  5.00  0.00           P  
ATOM    684  C5'  DT A  22     -42.622 -21.684 -18.280  8.00  0.00           C  
ATOM    685  O5'  DT A  22     -42.836 -21.067 -19.540  0.00  0.00           O  
ATOM    686  C4'  DT A  22     -43.017 -23.189 -18.210  3.00  0.00           C  
ATOM    687  O4'  DT A  22     -44.400 -23.460 -18.340  2.00  0.00           O  
ATOM    688  C3'  DT A  22     -42.318 -23.956 -19.310  9.00  0.00           C  
ATOM    689  O3'  DT A  22     -41.656 -25.089 -18.740  5.00  0.00           O  
ATOM    690  C2'  DT A  22     -43.425 -24.267 -20.260  1.00  0.00           C  
ATOM    691  C1'  DT A  22     -44.513 -24.547 -19.280  5.00  0.00           C  
ATOM    692  N1   DT A  22     -45.871 -24.488 -20.010  2.00  0.00           N  
ATOM    693  C2   DT A  22     -46.359 -25.736 -20.470  6.00  0.00           C  
ATOM    694  O2   DT A  22     -45.673 -26.774 -20.500  0.00  0.00           O  
ATOM    695  N3   DT A  22     -47.680 -25.799 -20.850  5.00  0.00           N  
ATOM    696  C4   DT A  22     -48.564 -24.698 -20.660  0.00  0.00           C  
ATOM    697  O4   DT A  22     -49.762 -24.970 -20.890  5.00  0.00           O  
ATOM    698  C5   DT A  22     -48.005 -23.471 -20.150  5.00  0.00           C  
ATOM    699  C6   DT A  22     -46.666 -23.365 -19.920  3.00  0.00           C  
ATOM    700  C7   DT A  22     -48.882 -22.228 -19.930  1.00  0.00           C  
ATOM    701  OP1  DT A  22     -42.184 -18.649 -18.890  1.00  0.00           O  
ATOM    702  OP2  DT A  22     -40.940 -19.859 -20.690  5.00  0.00           O1-
ATOM    703  H3   DT A  22     -48.097 -26.689 -21.190  8.00  0.00           H  
ATOM    704  H6   DT A  22     -46.272 -22.462 -19.530  7.00  0.00           H  
ATOM    705  H1'  DT A  22     -44.273 -25.545 -18.850  3.00  0.00           H  
ATOM    706  H2'  DT A  22     -43.562 -23.382 -20.880  0.00  0.00           H  
ATOM    707  H3'  DT A  22     -41.631 -23.373 -19.910  5.00  0.00           H  
ATOM    708  H4'  DT A  22     -42.613 -23.705 -17.280  9.00  0.00           H  
ATOM    709  H5'  DT A  22     -43.132 -21.066 -17.480  7.00  0.00           H  
ATOM    710  H71  DT A  22     -49.839 -22.496 -19.370  2.00  0.00           H  
ATOM    711  H72  DT A  22     -48.433 -21.337 -19.490  0.00  0.00           H  
ATOM    712  H73  DT A  22     -49.239 -21.798 -20.860  8.00  0.00           H  
ATOM    713 H2''  DT A  22     -43.272 -25.141 -20.870  8.00  0.00           H  
ATOM    714 H5''  DT A  22     -41.556 -21.706 -18.070  4.00  0.00           H  
ATOM    715  P    DT A  23     -40.757 -26.185 -19.520  2.00  0.00           P  
ATOM    716  C5'  DT A  23     -42.825 -27.799 -19.240  6.00  0.00           C  
ATOM    717  O5'  DT A  23     -41.764 -27.278 -20.030  2.00  0.00           O  
ATOM    718  C4'  DT A  23     -42.394 -29.139 -18.570  3.00  0.00           C  
ATOM    719  O4'  DT A  23     -43.424 -29.434 -17.770  3.00  0.00           O  
ATOM    720  C3'  DT A  23     -42.048 -30.231 -19.580  2.00  0.00           C  
ATOM    721  O3'  DT A  23     -41.044 -31.038 -19.010  4.00  0.00           O  
ATOM    722  C2'  DT A  23     -43.515 -30.780 -19.740  3.00  0.00           C  
ATOM    723  C1'  DT A  23     -43.864 -30.698 -18.230  4.00  0.00           C  
ATOM    724  N1   DT A  23     -45.326 -30.901 -18.130  1.00  0.00           N  
ATOM    725  C2   DT A  23     -45.777 -32.106 -17.660  4.00  0.00           C  
ATOM    726  O2   DT A  23     -45.115 -33.077 -17.380  9.00  0.00           O  
ATOM    727  N3   DT A  23     -47.167 -32.258 -17.410  1.00  0.00           N  
ATOM    728  C4   DT A  23     -48.135 -31.369 -17.730  8.00  0.00           C  
ATOM    729  O4   DT A  23     -49.269 -31.768 -17.550  0.00  0.00           O  
ATOM    730  C5   DT A  23     -47.619 -30.073 -18.280  4.00  0.00           C  
ATOM    731  C6   DT A  23     -46.268 -29.887 -18.470  8.00  0.00           C  
ATOM    732  C7   DT A  23     -48.689 -29.020 -18.670  2.00  0.00           C  
ATOM    733  OP1  DT A  23     -39.818 -26.766 -18.510  1.00  0.00           O  
ATOM    734  OP2  DT A  23     -40.263 -25.525 -20.750  6.00  0.00           O1-
ATOM    735  H3   DT A  23     -47.377 -33.131 -16.990  2.00  0.00           H  
ATOM    736  H6   DT A  23     -45.885 -28.988 -18.940  6.00  0.00           H  
ATOM    737  H1'  DT A  23     -43.327 -31.545 -17.770  8.00  0.00           H  
ATOM    738  H2'  DT A  23     -44.173 -30.066 -20.330  4.00  0.00           H  
ATOM    739  H3'  DT A  23     -41.715 -29.821 -20.530  2.00  0.00           H  
ATOM    740  H4'  DT A  23     -41.572 -28.987 -17.880  5.00  0.00           H  
ATOM    741  H5'  DT A  23     -43.731 -28.051 -19.750  4.00  0.00           H  
ATOM    742  H71  DT A  23     -49.449 -28.895 -17.860  9.00  0.00           H  
ATOM    743  H72  DT A  23     -48.407 -28.020 -18.920  9.00  0.00           H  
ATOM    744  H73  DT A  23     -49.143 -29.437 -19.510  9.00  0.00           H  
ATOM    745 H2''  DT A  23     -43.382 -31.833 -20.030  3.00  0.00           H  
ATOM    746 H5''  DT A  23     -43.067 -27.124 -18.430  6.00  0.00           H  
ATOM    747  P    DA A  24     -40.257 -32.068 -19.870  8.00  0.00           P  
ATOM    748  C5'  DA A  24     -41.199 -34.316 -18.950  3.00  0.00           C  
ATOM    749  O5'  DA A  24     -41.188 -33.235 -19.940  2.00  0.00           O  
ATOM    750  C4'  DA A  24     -42.195 -35.428 -19.280  5.00  0.00           C  
ATOM    751  O4'  DA A  24     -43.617 -35.211 -19.010  8.00  0.00           O  
ATOM    752  C3'  DA A  24     -42.182 -35.746 -20.830  3.00  0.00           C  
ATOM    753  O3'  DA A  24     -42.290 -37.226 -20.990  9.00  0.00           O  
ATOM    754  C2'  DA A  24     -43.420 -35.001 -21.310  3.00  0.00           C  
ATOM    755  C1'  DA A  24     -44.341 -35.383 -20.230  3.00  0.00           C  
ATOM    756  N1   DA A  24     -47.629 -31.634 -21.710  5.00  0.00           N  
ATOM    757  C2   DA A  24     -46.301 -31.690 -21.790  5.00  0.00           C  
ATOM    758  N3   DA A  24     -45.576 -32.694 -21.390  3.00  0.00           N  
ATOM    759  C4   DA A  24     -46.212 -33.637 -20.690  2.00  0.00           C  
ATOM    760  C5   DA A  24     -47.574 -33.672 -20.430  2.00  0.00           C  
ATOM    761  C6   DA A  24     -48.243 -32.611 -21.010  9.00  0.00           C  
ATOM    762  N6   DA A  24     -49.559 -32.368 -20.820  3.00  0.00           N  
ATOM    763  N7   DA A  24     -47.945 -34.815 -19.600  6.00  0.00           N  
ATOM    764  C8   DA A  24     -46.749 -35.382 -19.440  3.00  0.00           C  
ATOM    765  N9   DA A  24     -45.728 -34.745 -20.070  1.00  0.00           N  
ATOM    766  OP1  DA A  24     -39.030 -32.498 -19.150  1.00  0.00           O  
ATOM    767  OP2  DA A  24     -40.054 -31.532 -21.270  2.00  0.00           O1-
ATOM    768  H2   DA A  24     -45.702 -31.007 -22.370  7.00  0.00           H  
ATOM    769  H8   DA A  24     -46.668 -36.342 -18.950  9.00  0.00           H  
ATOM    770  H1'  DA A  24     -44.571 -36.470 -20.460  2.00  0.00           H  
ATOM    771  H2'  DA A  24     -43.191 -33.940 -21.240  2.00  0.00           H  
ATOM    772  H3'  DA A  24     -41.304 -35.428 -21.350  2.00  0.00           H  
ATOM    773  H4'  DA A  24     -41.938 -36.355 -18.770  0.00  0.00           H  
ATOM    774  H5'  DA A  24     -41.465 -33.841 -18.070  7.00  0.00           H  
ATOM    775  H61  DA A  24     -49.952 -31.441 -21.040  9.00  0.00           H  
ATOM    776  H62  DA A  24     -50.088 -33.161 -20.470  0.00  0.00           H  
ATOM    777 H2''  DA A  24     -43.651 -35.329 -22.290  4.00  0.00           H  
ATOM    778 H5''  DA A  24     -40.140 -34.758 -18.820  0.00  0.00           H  
ATOM    779  P    DG A  25     -42.592 -37.822 -22.370  0.00  0.00           P  
ATOM    780  C5'  DG A  25     -44.987 -38.766 -22.030  1.00  0.00           C  
ATOM    781  O5'  DG A  25     -44.167 -37.698 -22.530  0.00  0.00           O  
ATOM    782  C4'  DG A  25     -46.415 -38.501 -22.340  6.00  0.00           C  
ATOM    783  O4'  DG A  25     -46.945 -37.256 -21.870  6.00  0.00           O  
ATOM    784  C3'  DG A  25     -46.805 -38.533 -23.880  0.00  0.00           C  
ATOM    785  O3'  DG A  25     -47.078 -39.859 -24.400  7.00  0.00           O  
ATOM    786  C2'  DG A  25     -48.054 -37.625 -23.850  7.00  0.00           C  
ATOM    787  C1'  DG A  25     -47.708 -36.640 -22.820  4.00  0.00           C  
ATOM    788  N1   DG A  25     -48.533 -32.006 -24.620  0.00  0.00           N  
ATOM    789  C2   DG A  25     -49.395 -32.985 -24.250  3.00  0.00           C  
ATOM    790  N2   DG A  25     -50.660 -32.614 -24.250  4.00  0.00           N  
ATOM    791  N3   DG A  25     -49.091 -34.230 -23.960  9.00  0.00           N  
ATOM    792  C4   DG A  25     -47.688 -34.436 -24.050  8.00  0.00           C  
ATOM    793  C5   DG A  25     -46.751 -33.505 -24.420  9.00  0.00           C  
ATOM    794  C6   DG A  25     -47.188 -32.193 -24.790  0.00  0.00           C  
ATOM    795  O6   DG A  25     -46.519 -31.220 -25.150  5.00  0.00           O  
ATOM    796  N7   DG A  25     -45.467 -34.100 -24.310  1.00  0.00           N  
ATOM    797  C8   DG A  25     -45.738 -35.281 -23.830  4.00  0.00           C  
ATOM    798  N9   DG A  25     -47.050 -35.534 -23.530  0.00  0.00           N  
ATOM    799  OP1  DG A  25     -42.246 -39.294 -22.200  1.00  0.00           O  
ATOM    800  OP2  DG A  25     -42.001 -36.960 -23.410  1.00  0.00           O1-
ATOM    801  H1   DG A  25     -48.966 -31.096 -24.850  5.00  0.00           H  
ATOM    802  H8   DG A  25     -45.049 -36.072 -23.630  0.00  0.00           H  
ATOM    803  H1'  DG A  25     -48.637 -36.344 -22.310  5.00  0.00           H  
ATOM    804  H2'  DG A  25     -48.207 -37.180 -24.850  2.00  0.00           H  
ATOM    805  H21  DG A  25     -51.012 -31.639 -24.190  8.00  0.00           H  
ATOM    806  H3'  DG A  25     -45.886 -38.074 -24.380  7.00  0.00           H  
ATOM    807  H22  DG A  25     -51.331 -33.317 -24.150  7.00  0.00           H  
ATOM    808  H4'  DG A  25     -47.009 -39.299 -21.780  9.00  0.00           H  
ATOM    809  H5'  DG A  25     -44.873 -38.879 -20.970  1.00  0.00           H  
ATOM    810 H2''  DG A  25     -48.923 -38.112 -23.510  5.00  0.00           H  
ATOM    811 H5''  DG A  25     -44.670 -39.779 -22.470  0.00  0.00           H  
ATOM    812  P    DG A  26     -47.159 -40.122 -25.950  2.00  0.00           P  
ATOM    813  C5'  DG A  26     -49.715 -40.334 -25.590  6.00  0.00           C  
ATOM    814  O5'  DG A  26     -48.641 -39.715 -26.220  1.00  0.00           O  
ATOM    815  C4'  DG A  26     -50.951 -39.600 -26.130  1.00  0.00           C  
ATOM    816  O4'  DG A  26     -50.898 -38.181 -26.060  5.00  0.00           O  
ATOM    817  C3'  DG A  26     -51.219 -39.987 -27.550  0.00  0.00           C  
ATOM    818  O3'  DG A  26     -52.581 -40.377 -27.870  4.00  0.00           O  
ATOM    819  C2'  DG A  26     -50.725 -38.709 -28.270  7.00  0.00           C  
ATOM    820  C1'  DG A  26     -51.367 -37.693 -27.290  4.00  0.00           C  
ATOM    821  N1   DG A  26     -47.409 -34.389 -27.700  1.00  0.00           N  
ATOM    822  C2   DG A  26     -47.420 -35.755 -27.690  4.00  0.00           C  
ATOM    823  N2   DG A  26     -46.328 -36.385 -27.530  1.00  0.00           N  
ATOM    824  N3   DG A  26     -48.498 -36.530 -27.540  1.00  0.00           N  
ATOM    825  C4   DG A  26     -49.681 -35.809 -27.560  5.00  0.00           C  
ATOM    826  C5   DG A  26     -49.814 -34.465 -27.730  3.00  0.00           C  
ATOM    827  C6   DG A  26     -48.570 -33.664 -27.700  9.00  0.00           C  
ATOM    828  O6   DG A  26     -48.413 -32.472 -27.580  6.00  0.00           O  
ATOM    829  N7   DG A  26     -51.121 -34.050 -27.780  8.00  0.00           N  
ATOM    830  C8   DG A  26     -51.805 -35.197 -27.690  1.00  0.00           C  
ATOM    831  N9   DG A  26     -51.007 -36.312 -27.550  6.00  0.00           N  
ATOM    832  OP1  DG A  26     -47.078 -41.541 -26.160  7.00  0.00           O  
ATOM    833  OP2  DG A  26     -46.252 -39.274 -26.740  8.00  0.00           O1-
ATOM    834  H1   DG A  26     -46.566 -33.956 -27.730  9.00  0.00           H  
ATOM    835  H8   DG A  26     -52.876 -35.341 -27.670  3.00  0.00           H  
ATOM    836  H1'  DG A  26     -52.460 -37.833 -27.320  3.00  0.00           H  
ATOM    837  H2'  DG A  26     -49.677 -38.729 -28.330  7.00  0.00           H  
ATOM    838  H21  DG A  26     -45.500 -35.811 -27.570  3.00  0.00           H  
ATOM    839  H3'  DG A  26     -50.601 -40.883 -27.800  5.00  0.00           H  
ATOM    840  H22  DG A  26     -46.346 -37.428 -27.380  4.00  0.00           H  
ATOM    841  H4'  DG A  26     -51.794 -39.942 -25.610  1.00  0.00           H  
ATOM    842  H5'  DG A  26     -49.698 -40.205 -24.510  4.00  0.00           H  
ATOM    843 H2''  DG A  26     -50.976 -38.663 -29.300  2.00  0.00           H  
ATOM    844 H5''  DG A  26     -49.724 -41.394 -25.850  4.00  0.00           H  
ATOM    845  P    DG A  27     -53.090 -40.731 -29.310  0.00  0.00           P  
ATOM    846  C5'  DG A  27     -54.590 -38.581 -29.770  3.00  0.00           C  
ATOM    847  O5'  DG A  27     -53.427 -39.384 -30.100  7.00  0.00           O  
ATOM    848  C4'  DG A  27     -54.568 -37.288 -30.570  0.00  0.00           C  
ATOM    849  O4'  DG A  27     -53.276 -36.639 -30.300  7.00  0.00           O  
ATOM    850  C3'  DG A  27     -54.597 -37.500 -32.110  3.00  0.00           C  
ATOM    851  O3'  DG A  27     -55.658 -36.703 -32.570  4.00  0.00           O  
ATOM    852  C2'  DG A  27     -53.137 -37.118 -32.500  7.00  0.00           C  
ATOM    853  C1'  DG A  27     -52.814 -36.049 -31.500  2.00  0.00           C  
ATOM    854  N1   DG A  27     -49.623 -32.022 -30.910  2.00  0.00           N  
ATOM    855  C2   DG A  27     -50.979 -32.074 -31.030  8.00  0.00           C  
ATOM    856  N2   DG A  27     -51.609 -30.958 -31.330  7.00  0.00           N  
ATOM    857  N3   DG A  27     -51.788 -33.156 -31.090  3.00  0.00           N  
ATOM    858  C4   DG A  27     -51.047 -34.290 -31.060  3.00  0.00           C  
ATOM    859  C5   DG A  27     -49.680 -34.400 -31.010  2.00  0.00           C  
ATOM    860  C6   DG A  27     -48.899 -33.194 -30.880  5.00  0.00           C  
ATOM    861  O6   DG A  27     -47.647 -33.182 -30.720  8.00  0.00           O  
ATOM    862  N7   DG A  27     -49.227 -35.751 -30.870  2.00  0.00           N  
ATOM    863  C8   DG A  27     -50.305 -36.408 -31.120  2.00  0.00           C  
ATOM    864  N9   DG A  27     -51.463 -35.603 -31.280  0.00  0.00           N  
ATOM    865  OP1  DG A  27     -54.318 -41.508 -29.070  0.00  0.00           O  
ATOM    866  OP2  DG A  27     -51.983 -41.370 -30.050  9.00  0.00           O1-
ATOM    867  H1   DG A  27     -49.051 -31.177 -30.970  8.00  0.00           H  
ATOM    868  H8   DG A  27     -50.313 -37.504 -31.140  1.00  0.00           H  
ATOM    869  H1'  DG A  27     -53.398 -35.139 -31.700  7.00  0.00           H  
ATOM    870  H2'  DG A  27     -52.468 -37.984 -32.510  5.00  0.00           H  
ATOM    871  H21  DG A  27     -51.220 -30.004 -31.260  4.00  0.00           H  
ATOM    872  H3'  DG A  27     -54.834 -38.575 -32.270  4.00  0.00           H  
ATOM    873  H22  DG A  27     -52.624 -31.170 -31.170  8.00  0.00           H  
ATOM    874  H4'  DG A  27     -55.352 -36.617 -30.160  6.00  0.00           H  
ATOM    875  H5'  DG A  27     -54.429 -38.309 -28.770  9.00  0.00           H  
ATOM    876 H2''  DG A  27     -53.200 -36.654 -33.460  7.00  0.00           H  
ATOM    877 H5''  DG A  27     -55.582 -39.068 -29.740  7.00  0.00           H  
ATOM    878  P    DT A  28     -56.360 -36.970 -33.990  5.00  0.00           P  
ATOM    879  C5'  DT A  28     -56.317 -35.668 -36.390  6.00  0.00           C  
ATOM    880  O5'  DT A  28     -55.721 -35.975 -35.100  7.00  0.00           O  
ATOM    881  C4'  DT A  28     -55.376 -34.826 -37.260  8.00  0.00           C  
ATOM    882  O4'  DT A  28     -55.308 -33.507 -36.770  2.00  0.00           O  
ATOM    883  C3'  DT A  28     -53.965 -35.412 -37.460  4.00  0.00           C  
ATOM    884  O3'  DT A  28     -53.461 -34.886 -38.730  5.00  0.00           O  
ATOM    885  C2'  DT A  28     -53.301 -34.563 -36.330  7.00  0.00           C  
ATOM    886  C1'  DT A  28     -53.989 -33.194 -36.570  0.00  0.00           C  
ATOM    887  N1   DT A  28     -54.059 -32.277 -35.410  7.00  0.00           N  
ATOM    888  C2   DT A  28     -53.485 -30.934 -35.530  4.00  0.00           C  
ATOM    889  O2   DT A  28     -52.980 -30.483 -36.540  8.00  0.00           O  
ATOM    890  N3   DT A  28     -53.504 -30.179 -34.390  1.00  0.00           N  
ATOM    891  C4   DT A  28     -54.141 -30.517 -33.230  5.00  0.00           C  
ATOM    892  O4   DT A  28     -54.161 -29.669 -32.350  6.00  0.00           O  
ATOM    893  C5   DT A  28     -54.653 -31.910 -33.100  2.00  0.00           C  
ATOM    894  C6   DT A  28     -54.582 -32.700 -34.200  6.00  0.00           C  
ATOM    895  C7   DT A  28     -55.405 -32.369 -31.900  6.00  0.00           C  
ATOM    896  OP1  DT A  28     -57.748 -36.574 -33.730  5.00  0.00           O  
ATOM    897  OP2  DT A  28     -56.135 -38.372 -34.310  5.00  0.00           O1-
ATOM    898  H3   DT A  28     -53.293 -29.206 -34.470  5.00  0.00           H  
ATOM    899  H6   DT A  28     -55.076 -33.618 -34.180  7.00  0.00           H  
ATOM    900  H1'  DT A  28     -53.489 -32.658 -37.380  4.00  0.00           H  
ATOM    901  H2'  DT A  28     -53.568 -35.051 -35.400  6.00  0.00           H  
ATOM    902  H3'  DT A  28     -53.796 -36.421 -37.330  3.00  0.00           H  
ATOM    903  H4'  DT A  28     -55.824 -34.923 -38.290  7.00  0.00           H  
ATOM    904  H5'  DT A  28     -57.310 -35.175 -36.260  4.00  0.00           H  
ATOM    905  H71  DT A  28     -56.002 -33.248 -32.140  5.00  0.00           H  
ATOM    906  H72  DT A  28     -54.807 -32.597 -31.010  7.00  0.00           H  
ATOM    907  H73  DT A  28     -56.124 -31.656 -31.630  0.00  0.00           H  
ATOM    908 H2''  DT A  28     -52.193 -34.583 -36.570  7.00  0.00           H  
ATOM    909 H5''  DT A  28     -56.537 -36.682 -36.930  7.00  0.00           H  
ATOM    910  P    DT A  29     -53.655 -35.808 -39.930  5.00  0.00           P  
ATOM    911  C5'  DT A  29     -52.165 -37.871 -40.350  0.00  0.00           C  
ATOM    912  O5'  DT A  29     -52.306 -36.598 -39.780  8.00  0.00           O  
ATOM    913  C4'  DT A  29     -50.762 -38.436 -40.060  7.00  0.00           C  
ATOM    914  O4'  DT A  29     -49.862 -37.358 -40.180  8.00  0.00           O  
ATOM    915  C3'  DT A  29     -50.643 -39.124 -38.710  7.00  0.00           C  
ATOM    916  O3'  DT A  29     -49.702 -40.194 -38.800  2.00  0.00           O  
ATOM    917  C2'  DT A  29     -50.156 -37.931 -37.920  8.00  0.00           C  
ATOM    918  C1'  DT A  29     -49.258 -37.223 -38.920  7.00  0.00           C  
ATOM    919  N1   DT A  29     -48.919 -35.776 -38.520  4.00  0.00           N  
ATOM    920  C2   DT A  29     -47.511 -35.473 -38.370  8.00  0.00           C  
ATOM    921  O2   DT A  29     -46.604 -36.291 -38.610  4.00  0.00           O  
ATOM    922  N3   DT A  29     -47.194 -34.170 -38.020  7.00  0.00           N  
ATOM    923  C4   DT A  29     -48.160 -33.187 -37.860  0.00  0.00           C  
ATOM    924  O4   DT A  29     -47.779 -32.029 -37.610  1.00  0.00           O  
ATOM    925  C5   DT A  29     -49.544 -33.542 -38.070  6.00  0.00           C  
ATOM    926  C6   DT A  29     -49.895 -34.764 -38.380  4.00  0.00           C  
ATOM    927  C7   DT A  29     -50.534 -32.500 -37.960  1.00  0.00           C  
ATOM    928  OP1  DT A  29     -53.576 -34.986 -41.130  2.00  0.00           O  
ATOM    929  OP2  DT A  29     -54.746 -36.772 -39.840  9.00  0.00           O1-
ATOM    930  H3   DT A  29     -46.197 -33.864 -38.020  7.00  0.00           H  
ATOM    931  H6   DT A  29     -50.933 -35.013 -38.540  3.00  0.00           H  
ATOM    932  H1'  DT A  29     -48.361 -37.847 -38.990  8.00  0.00           H  
ATOM    933  H2'  DT A  29     -51.068 -37.396 -37.510  0.00  0.00           H  
ATOM    934  H3'  DT A  29     -51.550 -39.400 -38.310  2.00  0.00           H  
ATOM    935  H4'  DT A  29     -50.472 -39.276 -40.750  5.00  0.00           H  
ATOM    936  H5'  DT A  29     -52.215 -37.783 -41.380  7.00  0.00           H  
ATOM    937  H71  DT A  29     -51.451 -32.936 -38.330  4.00  0.00           H  
ATOM    938  H72  DT A  29     -50.576 -32.248 -36.910  0.00  0.00           H  
ATOM    939  H73  DT A  29     -50.245 -31.627 -38.530  7.00  0.00           H  
ATOM    940 H2''  DT A  29     -49.599 -38.302 -37.060  0.00  0.00           H  
ATOM    941 H5''  DT A  29     -52.924 -38.548 -40.110  4.00  0.00           H  
ATOM    942  P    DA A  30     -49.469 -41.308 -37.750  6.00  0.00           P  
ATOM    943  C5'  DA A  30     -47.271 -40.282 -36.860  3.00  0.00           C  
ATOM    944  O5'  DA A  30     -48.617 -40.635 -36.670  0.00  0.00           O  
ATOM    945  C4'  DA A  30     -46.698 -39.297 -35.870  4.00  0.00           C  
ATOM    946  O4'  DA A  30     -47.292 -37.989 -36.000  7.00  0.00           O  
ATOM    947  C3'  DA A  30     -46.800 -39.722 -34.460  7.00  0.00           C  
ATOM    948  O3'  DA A  30     -45.646 -39.432 -33.700  7.00  0.00           O  
ATOM    949  C2'  DA A  30     -47.913 -38.807 -33.950  1.00  0.00           C  
ATOM    950  C1'  DA A  30     -47.476 -37.523 -34.690  5.00  0.00           C  
ATOM    951  N1   DA A  30     -48.014 -32.363 -34.210  0.00  0.00           N  
ATOM    952  C2   DA A  30     -46.959 -33.102 -34.090  3.00  0.00           C  
ATOM    953  N3   DA A  30     -46.929 -34.452 -34.140  6.00  0.00           N  
ATOM    954  C4   DA A  30     -48.171 -35.044 -34.350  6.00  0.00           C  
ATOM    955  C5   DA A  30     -49.349 -34.379 -34.430  9.00  0.00           C  
ATOM    956  C6   DA A  30     -49.167 -32.937 -34.340  6.00  0.00           C  
ATOM    957  N6   DA A  30     -50.234 -32.090 -34.390  0.00  0.00           N  
ATOM    958  N7   DA A  30     -50.420 -35.283 -34.740  7.00  0.00           N  
ATOM    959  C8   DA A  30     -49.816 -36.419 -34.810  3.00  0.00           C  
ATOM    960  N9   DA A  30     -48.478 -36.414 -34.530  7.00  0.00           N  
ATOM    961  OP1  DA A  30     -48.673 -42.420 -38.270  2.00  0.00           O  
ATOM    962  OP2  DA A  30     -50.764 -41.561 -37.040  2.00  0.00           O1-
ATOM    963  H2   DA A  30     -46.014 -32.636 -33.860  3.00  0.00           H  
ATOM    964  H8   DA A  30     -50.437 -37.317 -35.010  9.00  0.00           H  
ATOM    965  H1'  DA A  30     -46.532 -37.173 -34.330  7.00  0.00           H  
ATOM    966  H2'  DA A  30     -48.902 -39.061 -34.330  2.00  0.00           H  
ATOM    967  H3'  DA A  30     -47.021 -40.804 -34.360  9.00  0.00           H  
ATOM    968  H4'  DA A  30     -45.610 -39.223 -36.010  4.00  0.00           H  
ATOM    969  H5'  DA A  30     -47.170 -39.804 -37.860  0.00  0.00           H  
ATOM    970  H61  DA A  30     -50.122 -31.090 -34.420  8.00  0.00           H  
ATOM    971  H62  DA A  30     -51.215 -32.483 -34.260  1.00  0.00           H  
ATOM    972 H2''  DA A  30     -47.873 -38.708 -32.810  9.00  0.00           H  
ATOM    973 H5''  DA A  30     -46.640 -41.214 -36.990  5.00  0.00           H  
ATOM    974  P    DG A  31     -45.060 -40.314 -32.550  6.00  0.00           P  
ATOM    975  C5'  DG A  31     -42.576 -39.791 -33.230  3.00  0.00           C  
ATOM    976  O5'  DG A  31     -43.596 -39.716 -32.320  4.00  0.00           O  
ATOM    977  C4'  DG A  31     -41.321 -39.021 -32.710  1.00  0.00           C  
ATOM    978  O4'  DG A  31     -41.431 -37.589 -32.730  0.00  0.00           O  
ATOM    979  C3'  DG A  31     -40.954 -39.333 -31.210  2.00  0.00           C  
ATOM    980  O3'  DG A  31     -39.573 -39.601 -31.100  7.00  0.00           O  
ATOM    981  C2'  DG A  31     -41.404 -38.023 -30.490  2.00  0.00           C  
ATOM    982  C1'  DG A  31     -40.866 -37.041 -31.540  0.00  0.00           C  
ATOM    983  N1   DG A  31     -44.764 -33.681 -31.200  0.00  0.00           N  
ATOM    984  C2   DG A  31     -44.730 -35.021 -30.950  2.00  0.00           C  
ATOM    985  N2   DG A  31     -45.901 -35.495 -30.600  4.00  0.00           N  
ATOM    986  N3   DG A  31     -43.677 -35.802 -31.080  6.00  0.00           N  
ATOM    987  C4   DG A  31     -42.503 -35.141 -31.230  0.00  0.00           C  
ATOM    988  C5   DG A  31     -42.381 -33.803 -31.160  9.00  0.00           C  
ATOM    989  C6   DG A  31     -43.570 -32.948 -31.140  7.00  0.00           C  
ATOM    990  O6   DG A  31     -43.659 -31.748 -31.040  7.00  0.00           O  
ATOM    991  N7   DG A  31     -40.993 -33.463 -31.240  0.00  0.00           N  
ATOM    992  C8   DG A  31     -40.435 -34.642 -31.220  0.00  0.00           C  
ATOM    993  N9   DG A  31     -41.243 -35.646 -31.350  5.00  0.00           N  
ATOM    994  OP1  DG A  31     -44.742 -41.632 -33.060  9.00  0.00           O  
ATOM    995  OP2  DG A  31     -45.729 -40.144 -31.300  6.00  0.00           O1-
ATOM    996  H1   DG A  31     -45.580 -33.139 -31.140  9.00  0.00           H  
ATOM    997  H8   DG A  31     -39.402 -34.832 -31.140  9.00  0.00           H  
ATOM    998  H1'  DG A  31     -39.813 -37.170 -31.590  5.00  0.00           H  
ATOM    999  H2'  DG A  31     -42.465 -37.883 -30.420  4.00  0.00           H  
ATOM   1000  H21  DG A  31     -46.652 -34.849 -30.610  6.00  0.00           H  
ATOM   1001  H3'  DG A  31     -41.641 -40.183 -30.870  1.00  0.00           H  
ATOM   1002  H22  DG A  31     -46.117 -36.458 -30.520  8.00  0.00           H  
ATOM   1003  H4'  DG A  31     -40.426 -39.360 -33.280  0.00  0.00           H  
ATOM   1004  H5'  DG A  31     -42.800 -39.335 -34.130  9.00  0.00           H  
ATOM   1005 H2''  DG A  31     -40.956 -37.905 -29.470  2.00  0.00           H  
ATOM   1006 H5''  DG A  31     -42.427 -40.898 -33.310  7.00  0.00           H  
ATOM   1007  P    DG A  32     -38.743 -40.013 -29.730  1.00  0.00           P  
ATOM   1008  C5'  DG A  32     -37.707 -37.625 -29.340  1.00  0.00           C  
ATOM   1009  O5'  DG A  32     -38.735 -38.558 -29.020  8.00  0.00           O  
ATOM   1010  C4'  DG A  32     -37.932 -36.372 -28.420  4.00  0.00           C  
ATOM   1011  O4'  DG A  32     -39.176 -35.833 -28.770  1.00  0.00           O  
ATOM   1012  C3'  DG A  32     -38.016 -36.681 -26.970  7.00  0.00           C  
ATOM   1013  O3'  DG A  32     -37.330 -35.657 -26.280  2.00  0.00           O  
ATOM   1014  C2'  DG A  32     -39.563 -36.637 -26.750  9.00  0.00           C  
ATOM   1015  C1'  DG A  32     -39.898 -35.472 -27.650  2.00  0.00           C  
ATOM   1016  N1   DG A  32     -43.118 -31.685 -27.400  5.00  0.00           N  
ATOM   1017  C2   DG A  32     -41.781 -31.691 -27.490  0.00  0.00           C  
ATOM   1018  N2   DG A  32     -41.207 -30.531 -27.520  5.00  0.00           N  
ATOM   1019  N3   DG A  32     -41.077 -32.750 -27.830  1.00  0.00           N  
ATOM   1020  C4   DG A  32     -41.798 -33.917 -27.780  7.00  0.00           C  
ATOM   1021  C5   DG A  32     -43.137 -34.056 -27.610  4.00  0.00           C  
ATOM   1022  C6   DG A  32     -43.921 -32.866 -27.310  4.00  0.00           C  
ATOM   1023  O6   DG A  32     -45.115 -32.653 -27.160  9.00  0.00           O  
ATOM   1024  N7   DG A  32     -43.541 -35.445 -27.660  2.00  0.00           N  
ATOM   1025  C8   DG A  32     -42.395 -36.072 -27.840  1.00  0.00           C  
ATOM   1026  N9   DG A  32     -41.285 -35.228 -27.830  4.00  0.00           N  
ATOM   1027  OP1  DG A  32     -37.432 -40.504 -30.190  8.00  0.00           O  
ATOM   1028  OP2  DG A  32     -39.603 -40.800 -28.850  2.00  0.00           O1-
ATOM   1029  H1   DG A  32     -43.550 -30.827 -27.090  8.00  0.00           H  
ATOM   1030  H8   DG A  32     -42.220 -37.135 -27.880  2.00  0.00           H  
ATOM   1031  H1'  DG A  32     -39.404 -34.615 -27.250  3.00  0.00           H  
ATOM   1032  H2'  DG A  32     -39.917 -37.583 -27.160  7.00  0.00           H  
ATOM   1033  H21  DG A  32     -41.597 -29.675 -27.190  5.00  0.00           H  
ATOM   1034  H3'  DG A  32     -37.658 -37.685 -26.780  6.00  0.00           H  
ATOM   1035  H22  DG A  32     -40.214 -30.606 -27.590  1.00  0.00           H  
ATOM   1036  H4'  DG A  32     -37.187 -35.615 -28.680  8.00  0.00           H  
ATOM   1037  H5'  DG A  32     -37.762 -37.408 -30.340  5.00  0.00           H  
ATOM   1038 H2''  DG A  32     -39.812 -36.529 -25.730  1.00  0.00           H  
ATOM   1039 H5''  DG A  32     -36.732 -38.160 -29.080  5.00  0.00           H  
ATOM   1040  P    DG A  33     -36.793 -35.887 -24.770  0.00  0.00           P  
ATOM   1041  C5'  DG A  33     -36.114 -33.336 -24.600  6.00  0.00           C  
ATOM   1042  O5'  DG A  33     -36.850 -34.470 -24.080  5.00  0.00           O  
ATOM   1043  C4'  DG A  33     -36.990 -32.429 -25.480  3.00  0.00           C  
ATOM   1044  O4'  DG A  33     -38.157 -31.976 -24.710  3.00  0.00           O  
ATOM   1045  C3'  DG A  33     -36.337 -31.200 -26.160  6.00  0.00           C  
ATOM   1046  O3'  DG A  33     -34.984 -30.837 -25.770  2.00  0.00           O  
ATOM   1047  C2'  DG A  33     -37.204 -30.152 -25.600  0.00  0.00           C  
ATOM   1048  C1'  DG A  33     -38.543 -30.849 -25.490  4.00  0.00           C  
ATOM   1049  N1   DG A  33     -43.207 -31.120 -23.660  6.00  0.00           N  
ATOM   1050  C2   DG A  33     -42.321 -32.167 -24.020  9.00  0.00           C  
ATOM   1051  N2   DG A  33     -42.693 -33.396 -24.000  8.00  0.00           N  
ATOM   1052  N3   DG A  33     -41.048 -31.927 -24.350  4.00  0.00           N  
ATOM   1053  C4   DG A  33     -40.754 -30.571 -24.380  3.00  0.00           C  
ATOM   1054  C5   DG A  33     -41.584 -29.560 -24.070  0.00  0.00           C  
ATOM   1055  C6   DG A  33     -42.929 -29.809 -23.620  4.00  0.00           C  
ATOM   1056  O6   DG A  33     -43.783 -29.017 -23.310  9.00  0.00           O  
ATOM   1057  N7   DG A  33     -40.849 -28.376 -24.070  6.00  0.00           N  
ATOM   1058  C8   DG A  33     -39.613 -28.665 -24.490  5.00  0.00           C  
ATOM   1059  N9   DG A  33     -39.555 -30.018 -24.830  2.00  0.00           N  
ATOM   1060  OP1  DG A  33     -35.398 -36.384 -24.750  1.00  0.00           O  
ATOM   1061  OP2  DG A  33     -37.784 -36.748 -24.070  1.00  0.00           O1-
ATOM   1062  H1   DG A  33     -44.200 -31.341 -23.530  2.00  0.00           H  
ATOM   1063  H8   DG A  33     -38.768 -28.000 -24.690  4.00  0.00           H  
ATOM   1064  H1'  DG A  33     -38.806 -31.160 -26.490  5.00  0.00           H  
ATOM   1065  H2'  DG A  33     -36.880 -29.856 -24.600  9.00  0.00           H  
ATOM   1066  H21  DG A  33     -43.633 -33.706 -23.870  2.00  0.00           H  
ATOM   1067  H3'  DG A  33     -36.455 -31.259 -27.270  3.00  0.00           H  
ATOM   1068  H22  DG A  33     -41.889 -33.978 -24.200  4.00  0.00           H  
ATOM   1069  H4'  DG A  33     -37.425 -33.127 -26.270  4.00  0.00           H  
ATOM   1070  H5'  DG A  33     -35.372 -33.641 -25.260  5.00  0.00           H  
ATOM   1071 H2''  DG A  33     -37.351 -29.322 -26.290  8.00  0.00           H  
ATOM   1072 H5''  DG A  33     -35.652 -32.776 -23.790  6.00  0.00           H  
ATOM   1073  P    DT A  34     -33.704 -31.127 -26.730  6.00  0.00           P  
ATOM   1074  C5'  DT A  34     -32.697 -28.711 -26.310  0.00  0.00           C  
ATOM   1075  O5'  DT A  34     -32.588 -30.133 -26.140  8.00  0.00           O  
ATOM   1076  C4'  DT A  34     -31.828 -27.867 -25.330  8.00  0.00           C  
ATOM   1077  O4'  DT A  34     -32.175 -28.023 -23.970  0.00  0.00           O  
ATOM   1078  C3'  DT A  34     -30.298 -28.125 -25.380  5.00  0.00           C  
ATOM   1079  O3'  DT A  34     -29.560 -26.896 -25.680  1.00  0.00           O  
ATOM   1080  C2'  DT A  34     -29.985 -28.432 -23.920  8.00  0.00           C  
ATOM   1081  C1'  DT A  34     -31.069 -27.756 -23.150  7.00  0.00           C  
ATOM   1082  N1   DT A  34     -31.269 -28.374 -21.790  9.00  0.00           N  
ATOM   1083  C2   DT A  34     -31.437 -27.480 -20.660  1.00  0.00           C  
ATOM   1084  O2   DT A  34     -31.409 -26.233 -20.790  0.00  0.00           O  
ATOM   1085  N3   DT A  34     -31.620 -28.107 -19.510  3.00  0.00           N  
ATOM   1086  C4   DT A  34     -31.805 -29.443 -19.280  0.00  0.00           C  
ATOM   1087  O4   DT A  34     -32.132 -29.703 -18.100  7.00  0.00           O  
ATOM   1088  C5   DT A  34     -31.560 -30.285 -20.370  4.00  0.00           C  
ATOM   1089  C6   DT A  34     -31.322 -29.758 -21.620  8.00  0.00           C  
ATOM   1090  C7   DT A  34     -31.536 -31.773 -20.140  2.00  0.00           C  
ATOM   1091  OP1  DT A  34     -34.136 -30.738 -28.100  6.00  0.00           O  
ATOM   1092  OP2  DT A  34     -33.398 -32.534 -26.410  0.00  0.00           O1-
ATOM   1093  H3   DT A  34     -31.869 -27.523 -18.690  4.00  0.00           H  
ATOM   1094  H6   DT A  34     -31.230 -30.509 -22.350  9.00  0.00           H  
ATOM   1095  H1'  DT A  34     -30.837 -26.735 -23.110  8.00  0.00           H  
ATOM   1096  H2'  DT A  34     -30.102 -29.500 -23.770  4.00  0.00           H  
ATOM   1097  H3'  DT A  34     -30.005 -29.084 -25.950  0.00  0.00           H  
ATOM   1098  H4'  DT A  34     -31.921 -26.809 -25.580  7.00  0.00           H  
ATOM   1099  H5'  DT A  34     -33.704 -28.440 -25.930  2.00  0.00           H  
ATOM   1100  H71  DT A  34     -30.756 -31.952 -19.470  1.00  0.00           H  
ATOM   1101  H72  DT A  34     -32.505 -32.103 -19.650  3.00  0.00           H  
ATOM   1102  H73  DT A  34     -31.364 -32.387 -21.060  3.00  0.00           H  
ATOM   1103 H2''  DT A  34     -29.056 -28.080 -23.630  9.00  0.00           H  
ATOM   1104 H5''  DT A  34     -32.538 -28.422 -27.330  0.00  0.00           H  
ATOM   1105  P    DT A  35     -28.736 -26.704 -26.980  3.00  0.00           P  
ATOM   1106  C5'  DT A  35     -26.602 -28.103 -26.130  4.00  0.00           C  
ATOM   1107  O5'  DT A  35     -27.702 -27.976 -27.040  2.00  0.00           O  
ATOM   1108  C4'  DT A  35     -26.156 -29.547 -26.000  8.00  0.00           C  
ATOM   1109  O4'  DT A  35     -27.186 -30.359 -25.500  8.00  0.00           O  
ATOM   1110  C3'  DT A  35     -25.686 -30.132 -27.300  8.00  0.00           C  
ATOM   1111  O3'  DT A  35     -24.298 -29.856 -27.650  2.00  0.00           O  
ATOM   1112  C2'  DT A  35     -25.909 -31.580 -27.110  3.00  0.00           C  
ATOM   1113  C1'  DT A  35     -27.080 -31.673 -26.090  1.00  0.00           C  
ATOM   1114  N1   DT A  35     -28.417 -32.040 -26.550  8.00  0.00           N  
ATOM   1115  C2   DT A  35     -28.871 -33.313 -26.240  4.00  0.00           C  
ATOM   1116  O2   DT A  35     -28.274 -34.085 -25.480  6.00  0.00           O  
ATOM   1117  N3   DT A  35     -29.988 -33.715 -26.860  1.00  0.00           N  
ATOM   1118  C4   DT A  35     -30.651 -33.154 -27.880  5.00  0.00           C  
ATOM   1119  O4   DT A  35     -31.492 -33.881 -28.430  5.00  0.00           O  
ATOM   1120  C5   DT A  35     -30.229 -31.761 -28.130  7.00  0.00           C  
ATOM   1121  C6   DT A  35     -29.118 -31.249 -27.470  2.00  0.00           C  
ATOM   1122  C7   DT A  35     -30.770 -31.059 -29.380  2.00  0.00           C  
ATOM   1123  OP1  DT A  35     -28.000 -25.464 -26.820  6.00  0.00           O  
ATOM   1124  OP2  DT A  35     -29.645 -26.934 -28.100  2.00  0.00           O1-
ATOM   1125  H3   DT A  35     -30.224 -34.686 -26.700  0.00  0.00           H  
ATOM   1126  H6   DT A  35     -28.660 -30.343 -27.800  6.00  0.00           H  
ATOM   1127  H1'  DT A  35     -26.875 -32.249 -25.290  7.00  0.00           H  
ATOM   1128  H2'  DT A  35     -26.052 -32.124 -27.950  6.00  0.00           H  
ATOM   1129  H3'  DT A  35     -26.357 -29.794 -28.140  3.00  0.00           H  
ATOM   1130  H4'  DT A  35     -25.368 -29.549 -25.240  9.00  0.00           H  
ATOM   1131  H5'  DT A  35     -26.972 -27.772 -25.150  6.00  0.00           H  
ATOM   1132  H71  DT A  35     -30.139 -30.254 -29.750  1.00  0.00           H  
ATOM   1133  H72  DT A  35     -31.051 -31.826 -30.120  0.00  0.00           H  
ATOM   1134  H73  DT A  35     -31.718 -30.702 -29.020  1.00  0.00           H  
ATOM   1135 H2''  DT A  35     -25.041 -31.996 -26.610  6.00  0.00           H  
ATOM   1136 H5''  DT A  35     -25.798 -27.466 -26.490  6.00  0.00           H  
ATOM   1137  P    DA A  36     -23.632 -30.437 -28.960  4.00  0.00           P  
ATOM   1138  C5'  DA A  36     -22.181 -32.256 -27.820  8.00  0.00           C  
ATOM   1139  O5'  DA A  36     -23.204 -31.997 -28.740  6.00  0.00           O  
ATOM   1140  C4'  DA A  36     -21.978 -33.798 -27.800  1.00  0.00           C  
ATOM   1141  O4'  DA A  36     -23.149 -34.476 -27.350  3.00  0.00           O  
ATOM   1142  C3'  DA A  36     -21.584 -34.374 -29.140  5.00  0.00           C  
ATOM   1143  O3'  DA A  36     -20.591 -35.394 -29.060  4.00  0.00           O  
ATOM   1144  C2'  DA A  36     -22.890 -35.099 -29.470  6.00  0.00           C  
ATOM   1145  C1'  DA A  36     -23.241 -35.593 -28.100  2.00  0.00           C  
ATOM   1146  N1   DA A  36     -25.717 -39.991 -28.830  6.00  0.00           N  
ATOM   1147  C2   DA A  36     -24.497 -39.619 -29.090  4.00  0.00           C  
ATOM   1148  N3   DA A  36     -23.899 -38.448 -28.880  1.00  0.00           N  
ATOM   1149  C4   DA A  36     -24.844 -37.544 -28.360  5.00  0.00           C  
ATOM   1150  C5   DA A  36     -26.159 -37.762 -28.080  1.00  0.00           C  
ATOM   1151  C6   DA A  36     -26.574 -39.085 -28.300  5.00  0.00           C  
ATOM   1152  N6   DA A  36     -27.761 -39.541 -28.090  0.00  0.00           N  
ATOM   1153  N7   DA A  36     -26.730 -36.511 -27.780  3.00  0.00           N  
ATOM   1154  C8   DA A  36     -25.714 -35.654 -27.690  4.00  0.00           C  
ATOM   1155  N9   DA A  36     -24.540 -36.277 -27.930  7.00  0.00           N  
ATOM   1156  OP1  DA A  36     -22.373 -29.673 -29.120  1.00  0.00           O  
ATOM   1157  OP2  DA A  36     -24.660 -30.395 -30.070  8.00  0.00           O1-
ATOM   1158  H2   DA A  36     -23.791 -40.319 -29.550  1.00  0.00           H  
ATOM   1159  H8   DA A  36     -25.776 -34.632 -27.380  3.00  0.00           H  
ATOM   1160  H1'  DA A  36     -22.420 -36.285 -27.800  7.00  0.00           H  
ATOM   1161  H2'  DA A  36     -23.622 -34.435 -29.870  6.00  0.00           H  
ATOM   1162  H3'  DA A  36     -21.278 -33.637 -29.900  0.00  0.00           H  
ATOM   1163  H4'  DA A  36     -21.186 -33.973 -27.110  0.00  0.00           H  
ATOM   1164  H5'  DA A  36     -22.542 -31.824 -26.840  5.00  0.00           H  
ATOM   1165  H61  DA A  36     -27.896 -40.555 -28.080  6.00  0.00           H  
ATOM   1166  H62  DA A  36     -28.389 -38.952 -27.510  6.00  0.00           H  
ATOM   1167 H2''  DA A  36     -22.626 -35.896 -30.170  6.00  0.00           H  
ATOM   1168 H5''  DA A  36     -21.233 -31.780 -28.100  9.00  0.00           H  
ATOM   1169  P    DG A  37     -19.070 -35.188 -29.150  9.00  0.00           P  
ATOM   1170  C5'  DG A  37     -18.579 -37.060 -27.290  7.00  0.00           C  
ATOM   1171  O5'  DG A  37     -18.489 -36.629 -28.640  4.00  0.00           O  
ATOM   1172  C4'  DG A  37     -18.510 -38.517 -27.100  8.00  0.00           C  
ATOM   1173  O4'  DG A  37     -19.646 -39.186 -27.640  8.00  0.00           O  
ATOM   1174  C3'  DG A  37     -17.199 -39.142 -27.580  0.00  0.00           C  
ATOM   1175  O3'  DG A  37     -16.523 -39.826 -26.540  1.00  0.00           O  
ATOM   1176  C2'  DG A  37     -17.823 -39.885 -28.740  8.00  0.00           C  
ATOM   1177  C1'  DG A  37     -19.141 -40.397 -28.220  3.00  0.00           C  
ATOM   1178  N1   DG A  37     -20.729 -44.409 -31.070  0.00  0.00           N  
ATOM   1179  C2   DG A  37     -19.737 -44.243 -30.140  0.00  0.00           C  
ATOM   1180  N2   DG A  37     -18.967 -45.286 -29.940  4.00  0.00           N  
ATOM   1181  N3   DG A  37     -19.323 -43.161 -29.600  6.00  0.00           N  
ATOM   1182  C4   DG A  37     -20.119 -42.092 -29.920  9.00  0.00           C  
ATOM   1183  C5   DG A  37     -21.099 -42.073 -30.870  3.00  0.00           C  
ATOM   1184  C6   DG A  37     -21.434 -43.286 -31.570  2.00  0.00           C  
ATOM   1185  O6   DG A  37     -22.214 -43.568 -32.420  6.00  0.00           O  
ATOM   1186  N7   DG A  37     -21.615 -40.752 -30.940  1.00  0.00           N  
ATOM   1187  C8   DG A  37     -20.959 -40.104 -29.970  7.00  0.00           C  
ATOM   1188  N9   DG A  37     -20.066 -40.884 -29.290  8.00  0.00           N  
ATOM   1189  OP1  DG A  37     -18.577 -34.179 -28.220  3.00  0.00           O  
ATOM   1190  OP2  DG A  37     -18.656 -35.138 -30.540  6.00  0.00           O1-
ATOM   1191  H1   DG A  37     -20.883 -45.337 -31.450  9.00  0.00           H  
ATOM   1192  H8   DG A  37     -21.192 -39.069 -29.740  8.00  0.00           H  
ATOM   1193  H1'  DG A  37     -18.942 -41.099 -27.420  0.00  0.00           H  
ATOM   1194  H2'  DG A  37     -17.926 -39.203 -29.610  8.00  0.00           H  
ATOM   1195  H21  DG A  37     -19.162 -46.203 -30.340  1.00  0.00           H  
ATOM   1196  H3'  DG A  37     -16.507 -38.490 -28.020  1.00  0.00           H  
ATOM   1197  H22  DG A  37     -18.117 -45.216 -29.330  8.00  0.00           H  
ATOM   1198  H4'  DG A  37     -18.563 -38.679 -25.980  5.00  0.00           H  
ATOM   1199  H5'  DG A  37     -19.504 -36.701 -26.890  9.00  0.00           H  
ATOM   1200 H2''  DG A  37     -17.184 -40.897 -29.020  2.00  0.00           H  
ATOM   1201 H5''  DG A  37     -17.778 -36.643 -26.650  0.00  0.00           H  
ATOM   1202  P    DG A  38     -15.308 -40.855 -26.870  5.00  0.00           P  
ATOM   1203  C5'  DG A  38     -16.768 -43.039 -26.670  4.00  0.00           C  
ATOM   1204  O5'  DG A  38     -15.896 -42.290 -27.440  3.00  0.00           O  
ATOM   1205  C4'  DG A  38     -16.521 -44.555 -26.660  6.00  0.00           C  
ATOM   1206  O4'  DG A  38     -16.731 -45.087 -27.930  7.00  0.00           O  
ATOM   1207  C3'  DG A  38     -15.138 -44.993 -26.280  4.00  0.00           C  
ATOM   1208  O3'  DG A  38     -15.087 -46.010 -25.300  4.00  0.00           O  
ATOM   1209  C2'  DG A  38     -14.521 -45.392 -27.590  1.00  0.00           C  
ATOM   1210  C1'  DG A  38     -15.749 -46.015 -28.250  9.00  0.00           C  
ATOM   1211  N1   DG A  38     -16.938 -49.336 -31.780  4.00  0.00           N  
ATOM   1212  C2   DG A  38     -17.488 -49.114 -30.580  3.00  0.00           C  
ATOM   1213  N2   DG A  38     -18.245 -50.023 -30.050  0.00  0.00           N  
ATOM   1214  N3   DG A  38     -17.192 -48.109 -29.790  8.00  0.00           N  
ATOM   1215  C4   DG A  38     -16.184 -47.345 -30.330  6.00  0.00           C  
ATOM   1216  C5   DG A  38     -15.653 -47.398 -31.580  3.00  0.00           C  
ATOM   1217  C6   DG A  38     -16.009 -48.497 -32.400  4.00  0.00           C  
ATOM   1218  O6   DG A  38     -15.734 -48.638 -33.590  5.00  0.00           O  
ATOM   1219  N7   DG A  38     -14.809 -46.314 -31.830  3.00  0.00           N  
ATOM   1220  C8   DG A  38     -14.689 -45.710 -30.650  4.00  0.00           C  
ATOM   1221  N9   DG A  38     -15.544 -46.243 -29.710  5.00  0.00           N  
ATOM   1222  OP1  DG A  38     -14.613 -40.984 -25.580  0.00  0.00           O  
ATOM   1223  OP2  DG A  38     -14.671 -40.179 -28.020  5.00  0.00           O1-
ATOM   1224  H1   DG A  38     -17.216 -50.135 -32.290  7.00  0.00           H  
ATOM   1225  H8   DG A  38     -14.165 -44.809 -30.500  4.00  0.00           H  
ATOM   1226  H1'  DG A  38     -15.979 -46.989 -27.690  2.00  0.00           H  
ATOM   1227  H2'  DG A  38     -14.167 -44.450 -28.030  2.00  0.00           H  
ATOM   1228  H21  DG A  38     -18.518 -50.907 -30.490  0.00  0.00           H  
ATOM   1229  H3'  DG A  38     -14.612 -44.146 -25.960  4.00  0.00           H  
ATOM   1230  H22  DG A  38     -18.438 -49.750 -29.110  0.00  0.00           H  
ATOM   1231  H4'  DG A  38     -17.110 -44.990 -25.970  5.00  0.00           H  
ATOM   1232  H5'  DG A  38     -17.672 -43.017 -27.200  8.00  0.00           H  
ATOM   1233 H2''  DG A  38     -13.641 -46.084 -27.490  3.00  0.00           H  
ATOM   1234 H5''  DG A  38     -16.816 -42.631 -25.660  1.00  0.00           H  
ATOM   1235  P    DG A  39     -13.947 -46.037 -24.170  6.00  0.00           P  
ATOM   1236  C5'  DG A  39     -14.873 -48.438 -23.400  3.00  0.00           C  
ATOM   1237  O5'  DG A  39     -13.778 -47.593 -23.880  0.00  0.00           O  
ATOM   1238  C4'  DG A  39     -15.303 -49.626 -24.240  0.00  0.00           C  
ATOM   1239  O4'  DG A  39     -15.473 -49.291 -25.640  2.00  0.00           O  
ATOM   1240  C3'  DG A  39     -14.239 -50.715 -24.260  7.00  0.00           C  
ATOM   1241  O3'  DG A  39     -14.185 -51.361 -23.050  4.00  0.00           O  
ATOM   1242  C2'  DG A  39     -14.702 -51.479 -25.510  4.00  0.00           C  
ATOM   1243  C1'  DG A  39     -15.402 -50.512 -26.360  7.00  0.00           C  
ATOM   1244  N1   DG A  39     -15.072 -52.444 -31.010  4.00  0.00           N  
ATOM   1245  C2   DG A  39     -15.772 -52.784 -30.020  9.00  0.00           C  
ATOM   1246  N2   DG A  39     -16.504 -53.847 -30.110  8.00  0.00           N  
ATOM   1247  N3   DG A  39     -15.967 -52.077 -28.890  6.00  0.00           N  
ATOM   1248  C4   DG A  39     -15.059 -51.023 -28.830  1.00  0.00           C  
ATOM   1249  C5   DG A  39     -14.168 -50.638 -29.830  5.00  0.00           C  
ATOM   1250  C6   DG A  39     -14.170 -51.357 -31.070  3.00  0.00           C  
ATOM   1251  O6   DG A  39     -13.606 -51.164 -32.180  6.00  0.00           O  
ATOM   1252  N7   DG A  39     -13.471 -49.543 -29.390  1.00  0.00           N  
ATOM   1253  C8   DG A  39     -13.803 -49.433 -28.100  6.00  0.00           C  
ATOM   1254  N9   DG A  39     -14.776 -50.305 -27.690  9.00  0.00           N  
ATOM   1255  OP1  DG A  39     -14.646 -45.474 -22.960  9.00  0.00           O  
ATOM   1256  OP2  DG A  39     -12.715 -45.527 -24.700  2.00  0.00           O1-
ATOM   1257  H1   DG A  39     -15.365 -53.042 -31.820  5.00  0.00           H  
ATOM   1258  H8   DG A  39     -13.454 -48.555 -27.550  3.00  0.00           H  
ATOM   1259  H1'  DG A  39     -16.345 -50.868 -26.620  5.00  0.00           H  
ATOM   1260  H2'  DG A  39     -13.899 -52.004 -26.030  8.00  0.00           H  
ATOM   1261  H21  DG A  39     -16.483 -54.456 -30.930  8.00  0.00           H  
ATOM   1262  H3'  DG A  39     -13.272 -50.217 -24.530  1.00  0.00           H  
ATOM   1263  H22  DG A  39     -17.065 -53.967 -29.290  0.00  0.00           H  
ATOM   1264  H4'  DG A  39     -16.227 -50.094 -23.850  9.00  0.00           H  
ATOM   1265  H5'  DG A  39     -15.802 -47.839 -23.210  0.00  0.00           H  
ATOM   1266 H2''  DG A  39     -15.401 -52.237 -25.150  9.00  0.00           H  
ATOM   1267 H5''  DG A  39     -14.557 -48.795 -22.370  5.00  0.00           H  
ATOM   1268  P    DT A  40     -13.141 -52.501 -22.760  5.00  0.00           P  
ATOM   1269  C5'  DT A  40     -14.946 -54.305 -23.100  8.00  0.00           C  
ATOM   1270  O5'  DT A  40     -13.668 -53.789 -23.440  3.00  0.00           O  
ATOM   1271  C4'  DT A  40     -15.260 -55.530 -23.990  6.00  0.00           C  
ATOM   1272  O4'  DT A  40     -15.321 -55.124 -25.390  4.00  0.00           O  
ATOM   1273  C3'  DT A  40     -14.226 -56.673 -23.840  8.00  0.00           C  
ATOM   1274  O3'  DT A  40     -14.831 -57.970 -23.640  0.00  0.00           O  
ATOM   1275  C2'  DT A  40     -13.537 -56.604 -25.180  8.00  0.00           C  
ATOM   1276  C1'  DT A  40     -14.469 -55.959 -26.220  0.00  0.00           C  
ATOM   1277  N1   DT A  40     -13.745 -55.234 -27.330  5.00  0.00           N  
ATOM   1278  C2   DT A  40     -13.738 -55.699 -28.670  4.00  0.00           C  
ATOM   1279  O2   DT A  40     -14.315 -56.682 -29.060  5.00  0.00           O  
ATOM   1280  N3   DT A  40     -12.938 -55.007 -29.520  3.00  0.00           N  
ATOM   1281  C4   DT A  40     -11.966 -54.051 -29.140  5.00  0.00           C  
ATOM   1282  O4   DT A  40     -11.276 -53.538 -30.010  8.00  0.00           O  
ATOM   1283  C5   DT A  40     -12.047 -53.721 -27.700  5.00  0.00           C  
ATOM   1284  C6   DT A  40     -12.887 -54.286 -26.880  1.00  0.00           C  
ATOM   1285  C7   DT A  40     -11.116 -52.657 -27.320  3.00  0.00           C  
ATOM   1286  OP1  DT A  40     -13.090 -52.620 -21.300  3.00  0.00           O  
ATOM   1287  OP2  DT A  40     -11.855 -52.265 -23.480  6.00  0.00           O1-
ATOM   1288  H3   DT A  40     -13.019 -55.273 -30.510  6.00  0.00           H  
ATOM   1289  H6   DT A  40     -12.892 -54.025 -25.760  4.00  0.00           H  
ATOM   1290  H1'  DT A  40     -15.040 -56.675 -26.670  8.00  0.00           H  
ATOM   1291  H2'  DT A  40     -12.642 -55.998 -25.050  0.00  0.00           H  
ATOM   1292  H3'  DT A  40     -13.521 -56.460 -23.080  0.00  0.00           H  
ATOM   1293  H4'  DT A  40     -16.219 -55.945 -23.740  6.00  0.00           H  
ATOM   1294  H5'  DT A  40     -15.729 -53.558 -23.170  5.00  0.00           H  
ATOM   1295  H71  DT A  40     -11.300 -51.749 -27.960  0.00  0.00           H  
ATOM   1296  H72  DT A  40     -11.235 -52.352 -26.300  5.00  0.00           H  
ATOM   1297  H73  DT A  40     -10.089 -52.980 -27.520  3.00  0.00           H  
ATOM   1298 H2''  DT A  40     -13.208 -57.560 -25.570  2.00  0.00           H  
ATOM   1299 H5''  DT A  40     -14.971 -54.643 -22.040  9.00  0.00           H  
ATOM   1300  P    DT A  41     -14.009 -59.374 -23.670  9.00  0.00           P  
ATOM   1301  C5'  DT A  41     -14.873 -60.040 -25.980  9.00  0.00           C  
ATOM   1302  O5'  DT A  41     -13.753 -59.798 -25.140  6.00  0.00           O  
ATOM   1303  C4'  DT A  41     -14.331 -60.419 -27.340  1.00  0.00           C  
ATOM   1304  O4'  DT A  41     -13.619 -59.419 -27.940  0.00  0.00           O  
ATOM   1305  C3'  DT A  41     -13.499 -61.714 -27.440  4.00  0.00           C  
ATOM   1306  O3'  DT A  41     -13.876 -62.527 -28.550  4.00  0.00           O  
ATOM   1307  C2'  DT A  41     -12.132 -61.086 -27.710  9.00  0.00           C  
ATOM   1308  C1'  DT A  41     -12.457 -59.908 -28.540  3.00  0.00           C  
ATOM   1309  N1   DT A  41     -11.355 -58.884 -28.680  4.00  0.00           N  
ATOM   1310  C2   DT A  41     -10.957 -58.531 -30.010  2.00  0.00           C  
ATOM   1311  O2   DT A  41     -11.404 -58.971 -31.060  1.00  0.00           O  
ATOM   1312  N3   DT A  41     -10.048 -57.559 -30.090  9.00  0.00           N  
ATOM   1313  C4   DT A  41      -9.620 -56.756 -29.080  7.00  0.00           C  
ATOM   1314  O4   DT A  41      -8.904 -55.761 -29.390  9.00  0.00           O  
ATOM   1315  C5   DT A  41     -10.047 -57.142 -27.750  2.00  0.00           C  
ATOM   1316  C6   DT A  41     -10.878 -58.187 -27.610  5.00  0.00           C  
ATOM   1317  C7   DT A  41      -9.626 -56.380 -26.510  0.00  0.00           C  
ATOM   1318  OP1  DT A  41     -14.906 -60.357 -23.100  4.00  0.00           O  
ATOM   1319  OP2  DT A  41     -12.694 -59.108 -23.060  6.00  0.00           O1-
ATOM   1320  H3   DT A  41      -9.815 -57.277 -30.990  3.00  0.00           H  
ATOM   1321  H6   DT A  41     -11.213 -58.492 -26.600  9.00  0.00           H  
ATOM   1322  H1'  DT A  41     -12.758 -60.132 -29.560  8.00  0.00           H  
ATOM   1323  H2'  DT A  41     -11.645 -60.763 -26.770  8.00  0.00           H  
ATOM   1324  H3'  DT A  41     -13.580 -62.311 -26.530  5.00  0.00           H  
ATOM   1325  H4'  DT A  41     -15.210 -60.526 -27.950  5.00  0.00           H  
ATOM   1326  H5'  DT A  41     -15.600 -59.220 -26.100  7.00  0.00           H  
ATOM   1327  H71  DT A  41      -8.571 -56.636 -26.280  2.00  0.00           H  
ATOM   1328  H72  DT A  41      -9.774 -55.315 -26.680  1.00  0.00           H  
ATOM   1329  H73  DT A  41     -10.126 -56.708 -25.600  8.00  0.00           H  
ATOM   1330 H2''  DT A  41     -11.383 -61.626 -28.150  6.00  0.00           H  
ATOM   1331 H5''  DT A  41     -15.365 -60.949 -25.620  2.00  0.00           H  
ATOM   1332  P    DA A  42     -13.443 -64.053 -28.630  8.00  0.00           P  
ATOM   1333  C5'  DA A  42     -12.345 -63.424 -30.910  0.00  0.00           C  
ATOM   1334  O5'  DA A  42     -12.151 -63.849 -29.580  0.00  0.00           O  
ATOM   1335  C4'  DA A  42     -10.945 -63.176 -31.490  4.00  0.00           C  
ATOM   1336  O4'  DA A  42     -10.367 -62.025 -30.840  8.00  0.00           O  
ATOM   1337  C3'  DA A  42     -10.027 -64.343 -31.380  8.00  0.00           C  
ATOM   1338  O3'  DA A  42      -9.748 -64.971 -32.600  3.00  0.00           O  
ATOM   1339  C2'  DA A  42      -8.755 -63.633 -30.810  3.00  0.00           C  
ATOM   1340  C1'  DA A  42      -8.969 -62.104 -30.920  4.00  0.00           C  
ATOM   1341  N1   DA A  42      -6.403 -57.798 -29.980  0.00  0.00           N  
ATOM   1342  C2   DA A  42      -6.879 -58.346 -31.110  2.00  0.00           C  
ATOM   1343  N3   DA A  42      -7.501 -59.533 -31.210  2.00  0.00           N  
ATOM   1344  C4   DA A  42      -7.695 -60.142 -29.960  8.00  0.00           C  
ATOM   1345  C5   DA A  42      -7.360 -59.673 -28.760  9.00  0.00           C  
ATOM   1346  C6   DA A  42      -6.628 -58.467 -28.840  0.00  0.00           C  
ATOM   1347  N6   DA A  42      -6.133 -57.754 -27.780  6.00  0.00           N  
ATOM   1348  N7   DA A  42      -7.855 -60.459 -27.730  3.00  0.00           N  
ATOM   1349  C8   DA A  42      -8.578 -61.360 -28.350  1.00  0.00           C  
ATOM   1350  N9   DA A  42      -8.473 -61.259 -29.750  7.00  0.00           N  
ATOM   1351  OP1  DA A  42     -14.501 -64.790 -29.300  8.00  0.00           O  
ATOM   1352  OP2  DA A  42     -13.000 -64.600 -27.350  7.00  0.00           O1-
ATOM   1353  H2   DA A  42      -6.583 -57.836 -32.030  7.00  0.00           H  
ATOM   1354  H8   DA A  42      -9.057 -62.198 -27.860  4.00  0.00           H  
ATOM   1355  H1'  DA A  42      -8.603 -61.680 -31.850  0.00  0.00           H  
ATOM   1356  H2'  DA A  42      -8.596 -64.000 -29.810  6.00  0.00           H  
ATOM   1357  H3'  DA A  42     -10.365 -65.067 -30.590  9.00  0.00           H  
ATOM   1358  H4'  DA A  42     -11.103 -62.836 -32.510  0.00  0.00           H  
ATOM   1359  H5'  DA A  42     -12.880 -62.476 -30.910  6.00  0.00           H  
ATOM   1360  H61  DA A  42      -5.563 -56.922 -27.920  3.00  0.00           H  
ATOM   1361  H62  DA A  42      -6.451 -58.020 -26.870  1.00  0.00           H  
ATOM   1362 H2''  DA A  42      -7.964 -63.867 -31.510  6.00  0.00           H  
ATOM   1363 H5''  DA A  42     -12.956 -64.211 -31.510  6.00  0.00           H  
ATOM   1364  P    DG A  43      -8.807 -66.261 -32.690  5.00  0.00           P  
ATOM   1365  C5'  DG A  43      -7.326 -64.911 -34.490  1.00  0.00           C  
ATOM   1366  O5'  DG A  43      -7.456 -65.605 -33.230  7.00  0.00           O  
ATOM   1367  C4'  DG A  43      -5.912 -64.385 -34.700  6.00  0.00           C  
ATOM   1368  O4'  DG A  43      -5.583 -63.286 -33.810  4.00  0.00           O  
ATOM   1369  C3'  DG A  43      -4.805 -65.527 -34.470  0.00  0.00           C  
ATOM   1370  O3'  DG A  43      -3.838 -65.443 -35.480  0.00  0.00           O  
ATOM   1371  C2'  DG A  43      -4.382 -65.153 -33.080  4.00  0.00           C  
ATOM   1372  C1'  DG A  43      -4.461 -63.638 -33.110  5.00  0.00           C  
ATOM   1373  N1   DG A  43      -3.519 -59.539 -30.250  6.00  0.00           N  
ATOM   1374  C2   DG A  43      -3.357 -59.798 -31.570  8.00  0.00           C  
ATOM   1375  N2   DG A  43      -2.991 -58.776 -32.240  7.00  0.00           N  
ATOM   1376  N3   DG A  43      -3.726 -60.895 -32.210  6.00  0.00           N  
ATOM   1377  C4   DG A  43      -4.194 -61.819 -31.310  7.00  0.00           C  
ATOM   1378  C5   DG A  43      -4.390 -61.699 -29.950  0.00  0.00           C  
ATOM   1379  C6   DG A  43      -4.099 -60.442 -29.340  1.00  0.00           C  
ATOM   1380  O6   DG A  43      -4.220 -60.182 -28.090  9.00  0.00           O  
ATOM   1381  N7   DG A  43      -4.923 -62.943 -29.560  1.00  0.00           N  
ATOM   1382  C8   DG A  43      -5.023 -63.711 -30.590  8.00  0.00           C  
ATOM   1383  N9   DG A  43      -4.624 -63.063 -31.720  6.00  0.00           N  
ATOM   1384  OP1  DG A  43      -9.339 -67.125 -33.760  8.00  0.00           O  
ATOM   1385  OP2  DG A  43      -8.548 -66.773 -31.390  1.00  0.00           O1-
ATOM   1386  H1   DG A  43      -3.235 -58.658 -29.970  9.00  0.00           H  
ATOM   1387  H8   DG A  43      -5.345 -64.743 -30.430  5.00  0.00           H  
ATOM   1388  H1'  DG A  43      -3.490 -63.297 -33.470  3.00  0.00           H  
ATOM   1389  H2'  DG A  43      -5.166 -65.598 -32.480  1.00  0.00           H  
ATOM   1390  H21  DG A  43      -2.504 -58.013 -31.780  8.00  0.00           H  
ATOM   1391  H3'  DG A  43      -5.259 -66.524 -34.520  3.00  0.00           H  
ATOM   1392  H22  DG A  43      -2.869 -58.917 -33.280  8.00  0.00           H  
ATOM   1393  H4'  DG A  43      -5.821 -64.064 -35.740  7.00  0.00           H  
ATOM   1394  H5'  DG A  43      -8.003 -64.104 -34.480  2.00  0.00           H  
ATOM   1395 H2''  DG A  43      -3.499 -65.661 -32.950  9.00  0.00           H  
ATOM   1396 H5''  DG A  43      -7.554 -65.569 -35.310  6.00  0.00           H  
ATOM   1397  P    DG A  44      -2.587 -66.352 -35.400  9.00  0.00           P  
ATOM   1398  C5'  DG A  44      -0.924 -64.447 -35.090  2.00  0.00           C  
ATOM   1399  O5'  DG A  44      -1.473 -65.595 -34.570  8.00  0.00           O  
ATOM   1400  C4'  DG A  44      -0.204 -63.545 -34.090  1.00  0.00           C  
ATOM   1401  O4'  DG A  44      -0.982 -63.237 -32.900  6.00  0.00           O  
ATOM   1402  C3'  DG A  44       1.150 -64.109 -33.520  1.00  0.00           C  
ATOM   1403  O3'  DG A  44       2.243 -63.232 -33.810  8.00  0.00           O  
ATOM   1404  C2'  DG A  44       0.842 -64.240 -32.030  6.00  0.00           C  
ATOM   1405  C1'  DG A  44      -0.094 -63.043 -31.910  5.00  0.00           C  
ATOM   1406  N1   DG A  44      -0.381 -60.456 -27.590  7.00  0.00           N  
ATOM   1407  C2   DG A  44       0.235 -60.168 -28.730  0.00  0.00           C  
ATOM   1408  N2   DG A  44       0.824 -59.021 -28.720  9.00  0.00           N  
ATOM   1409  N3   DG A  44       0.129 -60.874 -29.870  2.00  0.00           N  
ATOM   1410  C4   DG A  44      -0.472 -62.045 -29.650  1.00  0.00           C  
ATOM   1411  C5   DG A  44      -1.154 -62.507 -28.530  2.00  0.00           C  
ATOM   1412  C6   DG A  44      -1.055 -61.682 -27.380  9.00  0.00           C  
ATOM   1413  O6   DG A  44      -1.536 -61.960 -26.290  4.00  0.00           O  
ATOM   1414  N7   DG A  44      -1.688 -63.784 -28.850  6.00  0.00           N  
ATOM   1415  C8   DG A  44      -1.409 -63.988 -30.050  1.00  0.00           C  
ATOM   1416  N9   DG A  44      -0.699 -63.015 -30.640  6.00  0.00           N  
ATOM   1417  OP1  DG A  44      -2.029 -66.507 -36.770  4.00  0.00           O  
ATOM   1418  OP2  DG A  44      -2.990 -67.547 -34.640  8.00  0.00           O1-
ATOM   1419  H1   DG A  44      -0.179 -59.841 -26.880  2.00  0.00           H  
ATOM   1420  H8   DG A  44      -1.729 -64.866 -30.600  1.00  0.00           H  
ATOM   1421  H1'  DG A  44       0.481 -62.174 -32.050  6.00  0.00           H  
ATOM   1422  H2'  DG A  44       0.465 -65.172 -31.680  8.00  0.00           H  
ATOM   1423  H21  DG A  44       1.251 -58.657 -27.880  6.00  0.00           H  
ATOM   1424  H3'  DG A  44       1.374 -65.127 -34.040  5.00  0.00           H  
ATOM   1425  H22  DG A  44       1.109 -58.724 -29.580  8.00  0.00           H  
ATOM   1426  H4'  DG A  44       0.004 -62.608 -34.640  5.00  0.00           H  
ATOM   1427  H5'  DG A  44      -1.754 -63.761 -35.520  7.00  0.00           H  
ATOM   1428 H2''  DG A  44       1.843 -64.010 -31.500  0.00  0.00           H  
ATOM   1429 H5''  DG A  44      -0.247 -64.636 -35.930  4.00  0.00           H  
ATOM   1430  P   DG3 A  45       3.706 -63.560 -33.510  3.00  0.00           P  
ATOM   1431  C5' DG3 A  45       4.394 -61.287 -32.350  9.00  0.00           C  
ATOM   1432  O5' DG3 A  45       4.090 -62.688 -32.260  8.00  0.00           O  
ATOM   1433  C4' DG3 A  45       4.942 -60.633 -31.100  2.00  0.00           C  
ATOM   1434  O4' DG3 A  45       3.885 -60.706 -30.080  0.00  0.00           O  
ATOM   1435  C3' DG3 A  45       6.144 -61.420 -30.550  6.00  0.00           C  
ATOM   1436  O3' DG3 A  45       7.093 -60.521 -30.080  4.00  0.00           O  
ATOM   1437  C2' DG3 A  45       5.460 -62.232 -29.430  8.00  0.00           C  
ATOM   1438  C1' DG3 A  45       4.497 -61.173 -28.840  8.00  0.00           C  
ATOM   1439  N1  DG3 A  45       2.487 -60.756 -24.110  9.00  0.00           N  
ATOM   1440  C2  DG3 A  45       3.312 -59.891 -24.800  1.00  0.00           C  
ATOM   1441  N2  DG3 A  45       3.669 -58.804 -24.190  3.00  0.00           N  
ATOM   1442  N3  DG3 A  45       3.776 -60.083 -26.070  1.00  0.00           N  
ATOM   1443  C4  DG3 A  45       3.220 -61.224 -26.690  6.00  0.00           C  
ATOM   1444  C5  DG3 A  45       2.322 -62.069 -26.140  9.00  0.00           C  
ATOM   1445  C6  DG3 A  45       1.942 -61.830 -24.820  6.00  0.00           C  
ATOM   1446  O6  DG3 A  45       1.184 -62.509 -24.180  3.00  0.00           O  
ATOM   1447  N7  DG3 A  45       2.118 -63.141 -27.060  0.00  0.00           N  
ATOM   1448  C8  DG3 A  45       2.834 -62.855 -28.060  5.00  0.00           C  
ATOM   1449  N9  DG3 A  45       3.475 -61.658 -27.930  7.00  0.00           N  
ATOM   1450  OP1 DG3 A  45       4.553 -63.104 -34.630  8.00  0.00           O  
ATOM   1451  OP2 DG3 A  45       3.715 -64.938 -33.000  9.00  0.00           O  
ATOM   1452 HO3' DG3 A  45       7.934 -60.966 -30.010  9.00  0.00           H  
ATOM   1453  H1  DG3 A  45       2.212 -60.551 -23.180  4.00  0.00           H  
ATOM   1454  H8  DG3 A  45       3.027 -63.553 -28.870  1.00  0.00           H  
ATOM   1455  H1' DG3 A  45       5.055 -60.295 -28.420  5.00  0.00           H  
ATOM   1456  H2' DG3 A  45       4.824 -62.974 -29.840  1.00  0.00           H  
ATOM   1457  H21 DG3 A  45       3.297 -58.509 -23.240  6.00  0.00           H  
ATOM   1458  H3' DG3 A  45       6.573 -62.048 -31.330  4.00  0.00           H  
ATOM   1459  H22 DG3 A  45       4.111 -58.096 -24.750  0.00  0.00           H  
ATOM   1460  H4' DG3 A  45       5.122 -59.608 -31.310  4.00  0.00           H  
ATOM   1461  H5' DG3 A  45       3.530 -60.823 -32.780  4.00  0.00           H  
ATOM   1462 H2'' DG3 A  45       6.163 -62.714 -28.740  1.00  0.00           H  
ATOM   1463 H5'' DG3 A  45       5.009 -61.189 -33.210  5.00  0.00           H  
ATOM   1464  C5' DC5 A  46       2.548 -55.413 -16.100  5.00  0.00           C  
ATOM   1465  O5' DC5 A  46       1.120 -55.472 -15.930  5.00  0.00           O  
ATOM   1466  C4' DC5 A  46       2.946 -55.416 -17.580  0.00  0.00           C  
ATOM   1467  O4' DC5 A  46       2.792 -56.685 -18.230  5.00  0.00           O  
ATOM   1468  C3' DC5 A  46       2.109 -54.359 -18.400  4.00  0.00           C  
ATOM   1469  O3' DC5 A  46       2.949 -53.398 -19.130  2.00  0.00           O  
ATOM   1470  C2' DC5 A  46       1.314 -55.305 -19.320  6.00  0.00           C  
ATOM   1471  C1' DC5 A  46       2.239 -56.491 -19.590  0.00  0.00           C  
ATOM   1472  N1  DC5 A  46       1.627 -57.722 -20.120  2.00  0.00           N  
ATOM   1473  C2  DC5 A  46       2.164 -58.352 -21.200  9.00  0.00           C  
ATOM   1474  O2  DC5 A  46       3.232 -57.911 -21.680  0.00  0.00           O  
ATOM   1475  N3  DC5 A  46       1.700 -59.497 -21.730  9.00  0.00           N  
ATOM   1476  C4  DC5 A  46       0.614 -60.012 -21.180  5.00  0.00           C  
ATOM   1477  N4  DC5 A  46       0.069 -61.102 -21.760  5.00  0.00           N  
ATOM   1478  C5  DC5 A  46      -0.023 -59.433 -20.040  9.00  0.00           C  
ATOM   1479  C6  DC5 A  46       0.498 -58.268 -19.610  6.00  0.00           C  
ATOM   1480 HO5' DC5 A  46       0.981 -56.466 -15.840  9.00  0.00           H  
ATOM   1481  H5  DC5 A  46      -0.916 -59.848 -19.540  7.00  0.00           H  
ATOM   1482  H6  DC5 A  46       0.033 -57.770 -18.800  3.00  0.00           H  
ATOM   1483  H1' DC5 A  46       3.062 -56.188 -20.260  6.00  0.00           H  
ATOM   1484  H2' DC5 A  46       0.529 -55.639 -18.730  1.00  0.00           H  
ATOM   1485  H3' DC5 A  46       1.456 -53.819 -17.730  6.00  0.00           H  
ATOM   1486  H4' DC5 A  46       4.028 -55.129 -17.660  6.00  0.00           H  
ATOM   1487  H41 DC5 A  46       0.225 -61.362 -22.740  8.00  0.00           H  
ATOM   1488  H5' DC5 A  46       3.005 -56.285 -15.530  4.00  0.00           H  
ATOM   1489  H42 DC5 A  46      -0.860 -61.348 -21.480  4.00  0.00           H  
ATOM   1490 H2'' DC5 A  46       0.915 -54.605 -20.120  0.00  0.00           H  
ATOM   1491 H5'' DC5 A  46       2.974 -54.479 -15.630  4.00  0.00           H  
ATOM   1492  P    DC A  47       2.426 -52.222 -20.030  2.00  0.00           P  
ATOM   1493  C5'  DC A  47       3.323 -53.027 -22.450  0.00  0.00           C  
ATOM   1494  O5'  DC A  47       2.226 -52.829 -21.540  1.00  0.00           O  
ATOM   1495  C4'  DC A  47       2.853 -53.777 -23.750  0.00  0.00           C  
ATOM   1496  O4'  DC A  47       2.378 -55.184 -23.680  3.00  0.00           O  
ATOM   1497  C3'  DC A  47       1.841 -52.927 -24.540  0.00  0.00           C  
ATOM   1498  O3'  DC A  47       2.244 -52.578 -25.850  0.00  0.00           O  
ATOM   1499  C2'  DC A  47       0.706 -53.959 -24.550  7.00  0.00           C  
ATOM   1500  C1'  DC A  47       1.461 -55.258 -24.770  0.00  0.00           C  
ATOM   1501  N1   DC A  47       0.668 -56.477 -24.500  7.00  0.00           N  
ATOM   1502  C2   DC A  47       0.736 -57.559 -25.440  2.00  0.00           C  
ATOM   1503  O2   DC A  47       1.335 -57.521 -26.470  7.00  0.00           O  
ATOM   1504  N3   DC A  47       0.010 -58.720 -25.220  2.00  0.00           N  
ATOM   1505  C4   DC A  47      -0.841 -58.780 -24.240  6.00  0.00           C  
ATOM   1506  N4   DC A  47      -1.553 -59.837 -24.170  4.00  0.00           N  
ATOM   1507  C5   DC A  47      -1.032 -57.689 -23.330  1.00  0.00           C  
ATOM   1508  C6   DC A  47      -0.211 -56.608 -23.430  6.00  0.00           C  
ATOM   1509  OP1  DC A  47       3.527 -51.207 -20.120  8.00  0.00           O  
ATOM   1510  OP2  DC A  47       1.134 -51.685 -19.570  9.00  0.00           O1-
ATOM   1511  H5   DC A  47      -1.686 -57.771 -22.530  3.00  0.00           H  
ATOM   1512  H6   DC A  47      -0.241 -55.839 -22.630  3.00  0.00           H  
ATOM   1513  H1'  DC A  47       2.015 -55.312 -25.650  2.00  0.00           H  
ATOM   1514  H2'  DC A  47       0.377 -53.999 -23.520  6.00  0.00           H  
ATOM   1515  H3'  DC A  47       1.720 -52.020 -23.950  7.00  0.00           H  
ATOM   1516  H4'  DC A  47       3.807 -53.829 -24.270  6.00  0.00           H  
ATOM   1517  H41  DC A  47      -2.193 -59.976 -23.380  5.00  0.00           H  
ATOM   1518  H5'  DC A  47       4.029 -53.700 -21.990  1.00  0.00           H  
ATOM   1519  H42  DC A  47      -1.406 -60.460 -24.930  9.00  0.00           H  
ATOM   1520 H2''  DC A  47      -0.073 -53.804 -25.320  7.00  0.00           H  
ATOM   1521 H5''  DC A  47       3.833 -52.099 -22.750  3.00  0.00           H  
ATOM   1522  P    DC A  48       1.644 -51.523 -26.900  4.00  0.00           P  
ATOM   1523  C5'  DC A  48       2.679 -52.764 -28.910  3.00  0.00           C  
ATOM   1524  O5'  DC A  48       1.501 -52.451 -28.150  7.00  0.00           O  
ATOM   1525  C4'  DC A  48       2.430 -53.434 -30.270  3.00  0.00           C  
ATOM   1526  O4'  DC A  48       1.837 -54.597 -29.820  9.00  0.00           O  
ATOM   1527  C3'  DC A  48       1.442 -52.709 -31.230  0.00  0.00           C  
ATOM   1528  O3'  DC A  48       1.851 -52.846 -32.560  0.00  0.00           O  
ATOM   1529  C2'  DC A  48       0.096 -53.354 -30.950  4.00  0.00           C  
ATOM   1530  C1'  DC A  48       0.553 -54.773 -30.530  0.00  0.00           C  
ATOM   1531  N1   DC A  48      -0.378 -55.509 -29.660  0.00  0.00           N  
ATOM   1532  C2   DC A  48      -1.341 -56.452 -30.160  9.00  0.00           C  
ATOM   1533  O2   DC A  48      -1.278 -56.757 -31.380  1.00  0.00           O  
ATOM   1534  N3   DC A  48      -2.253 -57.045 -29.360  9.00  0.00           N  
ATOM   1535  C4   DC A  48      -2.182 -56.732 -28.110  9.00  0.00           C  
ATOM   1536  N4   DC A  48      -2.946 -57.499 -27.370  9.00  0.00           N  
ATOM   1537  C5   DC A  48      -1.446 -55.711 -27.570  8.00  0.00           C  
ATOM   1538  C6   DC A  48      -0.541 -55.092 -28.360  8.00  0.00           C  
ATOM   1539  OP1  DC A  48       2.727 -50.507 -27.110  1.00  0.00           O  
ATOM   1540  OP2  DC A  48       0.329 -51.019 -26.390  2.00  0.00           O1-
ATOM   1541  H5   DC A  48      -1.472 -55.409 -26.510  5.00  0.00           H  
ATOM   1542  H6   DC A  48       0.026 -54.221 -28.040  1.00  0.00           H  
ATOM   1543  H1'  DC A  48       0.718 -55.367 -31.470  1.00  0.00           H  
ATOM   1544  H2'  DC A  48      -0.483 -52.887 -30.260  3.00  0.00           H  
ATOM   1545  H3'  DC A  48       1.359 -51.595 -31.010  5.00  0.00           H  
ATOM   1546  H4'  DC A  48       3.390 -53.676 -30.750  2.00  0.00           H  
ATOM   1547  H41  DC A  48      -3.409 -58.304 -27.810  1.00  0.00           H  
ATOM   1548  H5'  DC A  48       3.319 -53.371 -28.310  4.00  0.00           H  
ATOM   1549  H42  DC A  48      -2.968 -57.307 -26.380  8.00  0.00           H  
ATOM   1550 H2''  DC A  48      -0.471 -53.561 -31.860  0.00  0.00           H  
ATOM   1551 H5''  DC A  48       3.220 -51.817 -29.110  1.00  0.00           H  
ATOM   1552  P    DT A  49       1.274 -51.917 -33.730  4.00  0.00           P  
ATOM   1553  C5'  DT A  49      -0.177 -53.524 -35.250  3.00  0.00           C  
ATOM   1554  O5'  DT A  49      -0.129 -52.454 -34.310  9.00  0.00           O  
ATOM   1555  C4'  DT A  49      -1.582 -54.156 -35.400  7.00  0.00           C  
ATOM   1556  O4'  DT A  49      -2.042 -54.829 -34.190  1.00  0.00           O  
ATOM   1557  C3'  DT A  49      -2.711 -53.276 -35.950  2.00  0.00           C  
ATOM   1558  O3'  DT A  49      -3.616 -53.906 -36.880  5.00  0.00           O  
ATOM   1559  C2'  DT A  49      -3.358 -52.966 -34.590  4.00  0.00           C  
ATOM   1560  C1'  DT A  49      -3.311 -54.326 -33.830  9.00  0.00           C  
ATOM   1561  N1   DT A  49      -3.811 -54.283 -32.460  1.00  0.00           N  
ATOM   1562  C2   DT A  49      -4.628 -55.365 -32.100  9.00  0.00           C  
ATOM   1563  O2   DT A  49      -5.186 -56.147 -32.910  6.00  0.00           O  
ATOM   1564  N3   DT A  49      -4.977 -55.493 -30.730  2.00  0.00           N  
ATOM   1565  C4   DT A  49      -4.618 -54.603 -29.760  8.00  0.00           C  
ATOM   1566  O4   DT A  49      -4.873 -54.867 -28.580  1.00  0.00           O  
ATOM   1567  C5   DT A  49      -3.858 -53.453 -30.230  3.00  0.00           C  
ATOM   1568  C6   DT A  49      -3.387 -53.326 -31.530  2.00  0.00           C  
ATOM   1569  C7   DT A  49      -3.395 -52.390 -29.250  4.00  0.00           C  
ATOM   1570  OP1  DT A  49       2.207 -52.058 -34.860  9.00  0.00           O  
ATOM   1571  OP2  DT A  49       1.065 -50.559 -33.190  9.00  0.00           O1-
ATOM   1572  H3   DT A  49      -5.584 -56.245 -30.480  4.00  0.00           H  
ATOM   1573  H6   DT A  49      -2.729 -52.493 -31.850  7.00  0.00           H  
ATOM   1574  H1'  DT A  49      -4.046 -54.977 -34.350  4.00  0.00           H  
ATOM   1575  H2'  DT A  49      -2.748 -52.129 -34.170  8.00  0.00           H  
ATOM   1576  H3'  DT A  49      -2.186 -52.438 -36.390  5.00  0.00           H  
ATOM   1577  H4'  DT A  49      -1.362 -54.924 -36.150  1.00  0.00           H  
ATOM   1578  H5'  DT A  49       0.493 -54.362 -34.850  5.00  0.00           H  
ATOM   1579  H71  DT A  49      -2.973 -52.768 -28.360  7.00  0.00           H  
ATOM   1580  H72  DT A  49      -2.719 -51.689 -29.640  7.00  0.00           H  
ATOM   1581  H73  DT A  49      -4.254 -51.937 -28.820  6.00  0.00           H  
ATOM   1582 H2''  DT A  49      -4.339 -52.662 -34.720  1.00  0.00           H  
ATOM   1583 H5''  DT A  49       0.252 -53.252 -36.230  5.00  0.00           H  
ATOM   1584  P    DA A  50      -3.359 -53.899 -38.490  0.00  0.00           P  
ATOM   1585  C5'  DA A  50      -4.333 -56.219 -39.220  0.00  0.00           C  
ATOM   1586  O5'  DA A  50      -4.576 -54.808 -38.970  7.00  0.00           O  
ATOM   1587  C4'  DA A  50      -5.554 -57.183 -39.050  1.00  0.00           C  
ATOM   1588  O4'  DA A  50      -5.919 -57.331 -37.670  8.00  0.00           O  
ATOM   1589  C3'  DA A  50      -6.791 -56.868 -39.930  3.00  0.00           C  
ATOM   1590  O3'  DA A  50      -7.345 -58.104 -40.510  4.00  0.00           O  
ATOM   1591  C2'  DA A  50      -7.763 -56.235 -38.870  3.00  0.00           C  
ATOM   1592  C1'  DA A  50      -7.290 -57.005 -37.590  1.00  0.00           C  
ATOM   1593  N1   DA A  50      -8.887 -56.824 -32.820  0.00  0.00           N  
ATOM   1594  C2   DA A  50      -8.979 -57.797 -33.770  4.00  0.00           C  
ATOM   1595  N3   DA A  50      -8.511 -57.705 -35.090  8.00  0.00           N  
ATOM   1596  C4   DA A  50      -7.938 -56.468 -35.320  1.00  0.00           C  
ATOM   1597  C5   DA A  50      -7.730 -55.460 -34.430  1.00  0.00           C  
ATOM   1598  C6   DA A  50      -8.323 -55.665 -33.110  8.00  0.00           C  
ATOM   1599  N6   DA A  50      -8.231 -54.907 -32.110  6.00  0.00           N  
ATOM   1600  N7   DA A  50      -7.039 -54.444 -35.000  5.00  0.00           N  
ATOM   1601  C8   DA A  50      -6.819 -54.823 -36.230  7.00  0.00           C  
ATOM   1602  N9   DA A  50      -7.419 -56.082 -36.480  7.00  0.00           N  
ATOM   1603  OP1  DA A  50      -2.047 -54.494 -38.790  6.00  0.00           O  
ATOM   1604  OP2  DA A  50      -3.638 -52.476 -38.950  6.00  0.00           O1-
ATOM   1605  H2   DA A  50      -9.528 -58.692 -33.520  6.00  0.00           H  
ATOM   1606  H8   DA A  50      -6.290 -54.165 -36.920  3.00  0.00           H  
ATOM   1607  H1'  DA A  50      -7.922 -57.877 -37.430  7.00  0.00           H  
ATOM   1608  H2'  DA A  50      -7.719 -55.118 -38.820  8.00  0.00           H  
ATOM   1609  H3'  DA A  50      -6.568 -56.169 -40.760  1.00  0.00           H  
ATOM   1610  H4'  DA A  50      -5.176 -58.145 -39.420  1.00  0.00           H  
ATOM   1611  H5'  DA A  50      -3.496 -56.472 -38.590  6.00  0.00           H  
ATOM   1612  H61  DA A  50      -8.549 -55.275 -31.230  3.00  0.00           H  
ATOM   1613  H62  DA A  50      -7.502 -54.185 -32.130  2.00  0.00           H  
ATOM   1614 H2''  DA A  50      -8.851 -56.423 -39.070  5.00  0.00           H  
ATOM   1615 H5''  DA A  50      -3.866 -56.260 -40.220  8.00  0.00           H  
ATOM   1616  P    DA A  51      -8.717 -58.199 -41.300  9.00  0.00           P  
ATOM   1617  C5'  DA A  51      -9.879 -59.722 -39.470  0.00  0.00           C  
ATOM   1618  O5'  DA A  51      -9.712 -58.424 -40.090  8.00  0.00           O  
ATOM   1619  C4'  DA A  51     -11.108 -59.761 -38.580  0.00  0.00           C  
ATOM   1620  O4'  DA A  51     -10.927 -58.912 -37.410  7.00  0.00           O  
ATOM   1621  C3'  DA A  51     -12.420 -59.198 -39.110  5.00  0.00           C  
ATOM   1622  O3'  DA A  51     -13.504 -60.052 -38.660  0.00  0.00           O  
ATOM   1623  C2'  DA A  51     -12.540 -57.806 -38.540  1.00  0.00           C  
ATOM   1624  C1'  DA A  51     -12.082 -58.052 -37.140  4.00  0.00           C  
ATOM   1625  N1   DA A  51     -12.227 -55.760 -32.620  8.00  0.00           N  
ATOM   1626  C2   DA A  51     -12.627 -56.989 -33.020  0.00  0.00           C  
ATOM   1627  N3   DA A  51     -12.542 -57.467 -34.230  4.00  0.00           N  
ATOM   1628  C4   DA A  51     -11.901 -56.587 -35.110  7.00  0.00           C  
ATOM   1629  C5   DA A  51     -11.495 -55.320 -34.860  1.00  0.00           C  
ATOM   1630  C6   DA A  51     -11.727 -54.939 -33.500  5.00  0.00           C  
ATOM   1631  N6   DA A  51     -11.363 -53.808 -33.030  2.00  0.00           N  
ATOM   1632  N7   DA A  51     -10.789 -54.789 -35.990  7.00  0.00           N  
ATOM   1633  C8   DA A  51     -10.870 -55.767 -36.900  5.00  0.00           C  
ATOM   1634  N9   DA A  51     -11.644 -56.824 -36.430  7.00  0.00           N  
ATOM   1635  OP1  DA A  51      -8.713 -59.351 -42.280  2.00  0.00           O  
ATOM   1636  OP2  DA A  51      -9.066 -56.884 -41.770  4.00  0.00           O1-
ATOM   1637  H2   DA A  51     -13.179 -57.648 -32.380  0.00  0.00           H  
ATOM   1638  H8   DA A  51     -10.441 -55.728 -37.950  2.00  0.00           H  
ATOM   1639  H1'  DA A  51     -12.861 -58.530 -36.520  0.00  0.00           H  
ATOM   1640  H2'  DA A  51     -11.826 -57.058 -39.000  4.00  0.00           H  
ATOM   1641  H3'  DA A  51     -12.344 -59.163 -40.180  0.00  0.00           H  
ATOM   1642  H4'  DA A  51     -11.354 -60.673 -38.290  2.00  0.00           H  
ATOM   1643  H5'  DA A  51      -8.975 -59.936 -38.920  4.00  0.00           H  
ATOM   1644  H61  DA A  51     -11.278 -53.699 -32.040  0.00  0.00           H  
ATOM   1645  H62  DA A  51     -10.944 -53.095 -33.600  6.00  0.00           H  
ATOM   1646 H2''  DA A  51     -13.554 -57.525 -38.580  5.00  0.00           H  
ATOM   1647 H5''  DA A  51     -10.020 -60.521 -40.270  5.00  0.00           H  
ATOM   1648  P    DC A  52     -15.042 -59.955 -39.250  3.00  0.00           P  
ATOM   1649  C5'  DC A  52     -16.366 -60.132 -36.930  4.00  0.00           C  
ATOM   1650  O5'  DC A  52     -15.821 -59.348 -38.030  2.00  0.00           O  
ATOM   1651  C4'  DC A  52     -16.978 -59.396 -35.750  2.00  0.00           C  
ATOM   1652  O4'  DC A  52     -15.911 -58.654 -35.170  7.00  0.00           O  
ATOM   1653  C3'  DC A  52     -18.052 -58.374 -36.090  5.00  0.00           C  
ATOM   1654  O3'  DC A  52     -19.369 -58.923 -36.200  0.00  0.00           O  
ATOM   1655  C2'  DC A  52     -17.828 -57.496 -34.860  1.00  0.00           C  
ATOM   1656  C1'  DC A  52     -16.436 -57.589 -34.430  4.00  0.00           C  
ATOM   1657  N1   DC A  52     -15.719 -56.251 -34.600  8.00  0.00           N  
ATOM   1658  C2   DC A  52     -15.635 -55.411 -33.460  3.00  0.00           C  
ATOM   1659  O2   DC A  52     -16.144 -55.741 -32.370  9.00  0.00           O  
ATOM   1660  N3   DC A  52     -15.087 -54.136 -33.500  2.00  0.00           N  
ATOM   1661  C4   DC A  52     -14.538 -53.839 -34.610  0.00  0.00           C  
ATOM   1662  N4   DC A  52     -14.056 -52.628 -34.730  4.00  0.00           N  
ATOM   1663  C5   DC A  52     -14.397 -54.683 -35.760  9.00  0.00           C  
ATOM   1664  C6   DC A  52     -15.129 -55.799 -35.760  3.00  0.00           C  
ATOM   1665  OP1  DC A  52     -15.615 -61.294 -39.590  4.00  0.00           O  
ATOM   1666  OP2  DC A  52     -15.007 -59.017 -40.340  2.00  0.00           O1-
ATOM   1667  H5   DC A  52     -13.728 -54.475 -36.600  4.00  0.00           H  
ATOM   1668  H6   DC A  52     -15.024 -56.489 -36.640  0.00  0.00           H  
ATOM   1669  H1'  DC A  52     -16.364 -57.885 -33.370  0.00  0.00           H  
ATOM   1670  H2'  DC A  52     -18.025 -56.473 -35.010  8.00  0.00           H  
ATOM   1671  H3'  DC A  52     -17.629 -57.816 -36.990  7.00  0.00           H  
ATOM   1672  H4'  DC A  52     -17.448 -60.102 -35.080  0.00  0.00           H  
ATOM   1673  H41  DC A  52     -14.080 -51.967 -33.960  2.00  0.00           H  
ATOM   1674  H5'  DC A  52     -15.547 -60.760 -36.560  5.00  0.00           H  
ATOM   1675  H42  DC A  52     -13.564 -52.429 -35.560  5.00  0.00           H  
ATOM   1676 H2''  DC A  52     -18.430 -57.802 -34.000  1.00  0.00           H  
ATOM   1677 H5''  DC A  52     -17.043 -60.839 -37.380  4.00  0.00           H  
ATOM   1678  P    DC A  53     -20.570 -58.058 -36.790  6.00  0.00           P  
ATOM   1679  C5'  DC A  53     -21.302 -57.015 -34.550  5.00  0.00           C  
ATOM   1680  O5'  DC A  53     -20.858 -56.807 -35.880  8.00  0.00           O  
ATOM   1681  C4'  DC A  53     -21.456 -55.927 -33.560  9.00  0.00           C  
ATOM   1682  O4'  DC A  53     -20.149 -55.457 -33.300  3.00  0.00           O  
ATOM   1683  C3'  DC A  53     -22.314 -54.705 -33.840  7.00  0.00           C  
ATOM   1684  O3'  DC A  53     -23.656 -54.877 -33.430  3.00  0.00           O  
ATOM   1685  C2'  DC A  53     -21.681 -53.588 -32.960  2.00  0.00           C  
ATOM   1686  C1'  DC A  53     -20.220 -54.100 -32.910  6.00  0.00           C  
ATOM   1687  N1   DC A  53     -19.182 -53.294 -33.640  1.00  0.00           N  
ATOM   1688  C2   DC A  53     -18.605 -52.244 -32.920  7.00  0.00           C  
ATOM   1689  O2   DC A  53     -18.945 -51.916 -31.820  0.00  0.00           O  
ATOM   1690  N3   DC A  53     -17.604 -51.513 -33.530  3.00  0.00           N  
ATOM   1691  C4   DC A  53     -17.357 -51.705 -34.770  4.00  0.00           C  
ATOM   1692  N4   DC A  53     -16.579 -50.744 -35.170  0.00  0.00           N  
ATOM   1693  C5   DC A  53     -18.108 -52.533 -35.630  7.00  0.00           C  
ATOM   1694  C6   DC A  53     -19.061 -53.348 -34.990  2.00  0.00           C  
ATOM   1695  OP1  DC A  53     -21.722 -58.964 -36.830  0.00  0.00           O  
ATOM   1696  OP2  DC A  53     -20.074 -57.545 -38.150  1.00  0.00           O1-
ATOM   1697  H5   DC A  53     -17.957 -52.662 -36.740  0.00  0.00           H  
ATOM   1698  H6   DC A  53     -19.535 -54.124 -35.490  7.00  0.00           H  
ATOM   1699  H1'  DC A  53     -19.957 -54.100 -31.860  9.00  0.00           H  
ATOM   1700  H2'  DC A  53     -21.845 -52.582 -33.310  6.00  0.00           H  
ATOM   1701  H3'  DC A  53     -22.158 -54.409 -34.840  1.00  0.00           H  
ATOM   1702  H4'  DC A  53     -21.834 -56.400 -32.660  3.00  0.00           H  
ATOM   1703  H41  DC A  53     -16.143 -50.223 -34.440  5.00  0.00           H  
ATOM   1704  H5'  DC A  53     -20.548 -57.670 -34.120  4.00  0.00           H  
ATOM   1705  H42  DC A  53     -16.227 -50.768 -36.090  0.00  0.00           H  
ATOM   1706 H2''  DC A  53     -22.123 -53.524 -31.970  2.00  0.00           H  
ATOM   1707 H5''  DC A  53     -22.238 -57.622 -34.590  7.00  0.00           H  
ATOM   1708  P    DC A  54     -24.886 -54.080 -34.110  2.00  0.00           P  
ATOM   1709  C5'  DC A  54     -25.136 -52.324 -32.180  3.00  0.00           C  
ATOM   1710  O5'  DC A  54     -24.823 -52.596 -33.500  1.00  0.00           O  
ATOM   1711  C4'  DC A  54     -24.858 -50.909 -31.680  9.00  0.00           C  
ATOM   1712  O4'  DC A  54     -23.499 -50.596 -31.740  8.00  0.00           O  
ATOM   1713  C3'  DC A  54     -25.703 -49.766 -32.400  8.00  0.00           C  
ATOM   1714  O3'  DC A  54     -26.526 -48.944 -31.600  5.00  0.00           O  
ATOM   1715  C2'  DC A  54     -24.583 -48.949 -32.940  4.00  0.00           C  
ATOM   1716  C1'  DC A  54     -23.378 -49.222 -32.030  8.00  0.00           C  
ATOM   1717  N1   DC A  54     -22.100 -48.923 -32.780  2.00  0.00           N  
ATOM   1718  C2   DC A  54     -21.293 -47.935 -32.300  0.00  0.00           C  
ATOM   1719  O2   DC A  54     -21.599 -47.205 -31.340  0.00  0.00           O  
ATOM   1720  N3   DC A  54     -20.029 -47.728 -32.760  8.00  0.00           N  
ATOM   1721  C4   DC A  54     -19.723 -48.429 -33.840  6.00  0.00           C  
ATOM   1722  N4   DC A  54     -18.562 -48.075 -34.320  0.00  0.00           N  
ATOM   1723  C5   DC A  54     -20.503 -49.469 -34.390  9.00  0.00           C  
ATOM   1724  C6   DC A  54     -21.716 -49.730 -33.760  5.00  0.00           C  
ATOM   1725  OP1  DC A  54     -26.175 -54.645 -33.600  0.00  0.00           O  
ATOM   1726  OP2  DC A  54     -24.636 -53.992 -35.600  2.00  0.00           O1-
ATOM   1727  H5   DC A  54     -20.161 -50.014 -35.220  4.00  0.00           H  
ATOM   1728  H6   DC A  54     -22.248 -50.617 -34.050  6.00  0.00           H  
ATOM   1729  H1'  DC A  54     -23.456 -48.718 -31.100  2.00  0.00           H  
ATOM   1730  H2'  DC A  54     -24.420 -49.274 -33.940  4.00  0.00           H  
ATOM   1731  H3'  DC A  54     -26.251 -50.176 -33.200  5.00  0.00           H  
ATOM   1732  H4'  DC A  54     -25.171 -50.767 -30.580  8.00  0.00           H  
ATOM   1733  H41  DC A  54     -18.151 -47.381 -33.780  1.00  0.00           H  
ATOM   1734  H5'  DC A  54     -24.531 -52.986 -31.610  5.00  0.00           H  
ATOM   1735  H42  DC A  54     -18.132 -48.506 -35.160  4.00  0.00           H  
ATOM   1736 H2''  DC A  54     -24.823 -47.938 -32.960  6.00  0.00           H  
ATOM   1737 H5''  DC A  54     -26.213 -52.521 -31.990  6.00  0.00           H  
ATOM   1738  P    DT A  55     -28.044 -48.636 -31.960  5.00  0.00           P  
ATOM   1739  C5'  DT A  55     -28.740 -48.380 -29.490  2.00  0.00           C  
ATOM   1740  O5'  DT A  55     -28.598 -47.785 -30.720  2.00  0.00           O  
ATOM   1741  C4'  DT A  55     -29.375 -47.505 -28.390  8.00  0.00           C  
ATOM   1742  O4'  DT A  55     -28.575 -46.536 -27.670  9.00  0.00           O  
ATOM   1743  C3'  DT A  55     -30.693 -46.747 -28.750  6.00  0.00           C  
ATOM   1744  O3'  DT A  55     -31.558 -46.710 -27.570  6.00  0.00           O  
ATOM   1745  C2'  DT A  55     -30.077 -45.374 -29.160  0.00  0.00           C  
ATOM   1746  C1'  DT A  55     -28.858 -45.207 -28.130  2.00  0.00           C  
ATOM   1747  N1   DT A  55     -27.733 -44.551 -28.830  8.00  0.00           N  
ATOM   1748  C2   DT A  55     -27.616 -43.130 -28.900  4.00  0.00           C  
ATOM   1749  O2   DT A  55     -28.482 -42.358 -28.540  8.00  0.00           O  
ATOM   1750  N3   DT A  55     -26.600 -42.640 -29.640  2.00  0.00           N  
ATOM   1751  C4   DT A  55     -25.536 -43.337 -30.130  6.00  0.00           C  
ATOM   1752  O4   DT A  55     -24.571 -42.648 -30.570  7.00  0.00           O  
ATOM   1753  C5   DT A  55     -25.705 -44.803 -30.100  4.00  0.00           C  
ATOM   1754  C6   DT A  55     -26.770 -45.356 -29.460  7.00  0.00           C  
ATOM   1755  C7   DT A  55     -24.601 -45.528 -30.790  6.00  0.00           C  
ATOM   1756  OP1  DT A  55     -28.764 -49.921 -32.160  6.00  0.00           O  
ATOM   1757  OP2  DT A  55     -28.121 -47.696 -33.090  4.00  0.00           O1-
ATOM   1758  H3   DT A  55     -26.450 -41.671 -29.550  3.00  0.00           H  
ATOM   1759  H6   DT A  55     -26.889 -46.390 -29.550  9.00  0.00           H  
ATOM   1760  H1'  DT A  55     -29.246 -44.524 -27.320  0.00  0.00           H  
ATOM   1761  H2'  DT A  55     -29.874 -45.472 -30.250  4.00  0.00           H  
ATOM   1762  H3'  DT A  55     -31.199 -47.199 -29.610  5.00  0.00           H  
ATOM   1763  H4'  DT A  55     -29.646 -48.144 -27.540  1.00  0.00           H  
ATOM   1764  H5'  DT A  55     -27.705 -48.800 -29.240  1.00  0.00           H  
ATOM   1765  H71  DT A  55     -24.721 -45.657 -31.850  5.00  0.00           H  
ATOM   1766  H72  DT A  55     -23.665 -44.986 -30.660  5.00  0.00           H  
ATOM   1767  H73  DT A  55     -24.401 -46.474 -30.340  5.00  0.00           H  
ATOM   1768 H2''  DT A  55     -30.771 -44.552 -29.100  8.00  0.00           H  
ATOM   1769 H5''  DT A  55     -29.305 -49.333 -29.550  2.00  0.00           H  
ATOM   1770  P    DA A  56     -32.609 -45.603 -27.110  3.00  0.00           P  
ATOM   1771  C5'  DA A  56     -30.903 -44.898 -25.350  9.00  0.00           C  
ATOM   1772  O5'  DA A  56     -31.735 -44.435 -26.390  9.00  0.00           O  
ATOM   1773  C4'  DA A  56     -30.340 -43.647 -24.620  7.00  0.00           C  
ATOM   1774  O4'  DA A  56     -29.754 -42.724 -25.520  2.00  0.00           O  
ATOM   1775  C3'  DA A  56     -31.445 -42.820 -23.920  0.00  0.00           C  
ATOM   1776  O3'  DA A  56     -31.750 -43.485 -22.640  9.00  0.00           O  
ATOM   1777  C2'  DA A  56     -30.662 -41.482 -23.720  4.00  0.00           C  
ATOM   1778  C1'  DA A  56     -29.869 -41.395 -25.000  7.00  0.00           C  
ATOM   1779  N1   DA A  56     -30.192 -36.585 -27.000  0.00  0.00           N  
ATOM   1780  C2   DA A  56     -29.383 -37.091 -26.080  4.00  0.00           C  
ATOM   1781  N3   DA A  56     -29.451 -38.338 -25.590  7.00  0.00           N  
ATOM   1782  C4   DA A  56     -30.321 -39.185 -26.200  3.00  0.00           C  
ATOM   1783  C5   DA A  56     -31.149 -38.856 -27.240  3.00  0.00           C  
ATOM   1784  C6   DA A  56     -31.041 -37.454 -27.550  5.00  0.00           C  
ATOM   1785  N6   DA A  56     -31.751 -36.760 -28.410  3.00  0.00           N  
ATOM   1786  N7   DA A  56     -31.809 -39.968 -27.760  2.00  0.00           N  
ATOM   1787  C8   DA A  56     -31.421 -40.975 -26.990  7.00  0.00           C  
ATOM   1788  N9   DA A  56     -30.549 -40.549 -26.020  0.00  0.00           N  
ATOM   1789  OP1  DA A  56     -33.470 -46.255 -26.110  4.00  0.00           O  
ATOM   1790  OP2  DA A  56     -33.280 -44.956 -28.320  4.00  0.00           O1-
ATOM   1791  H2   DA A  56     -28.698 -36.483 -25.700  1.00  0.00           H  
ATOM   1792  H8   DA A  56     -31.619 -42.055 -27.200  1.00  0.00           H  
ATOM   1793  H1'  DA A  56     -28.896 -40.915 -24.770  3.00  0.00           H  
ATOM   1794  H2'  DA A  56     -31.326 -40.661 -23.550  6.00  0.00           H  
ATOM   1795  H3'  DA A  56     -32.378 -42.732 -24.490  9.00  0.00           H  
ATOM   1796  H4'  DA A  56     -29.643 -43.906 -23.930  2.00  0.00           H  
ATOM   1797  H5'  DA A  56     -30.039 -45.414 -25.820  1.00  0.00           H  
ATOM   1798  H61  DA A  56     -31.573 -35.785 -28.450  9.00  0.00           H  
ATOM   1799  H62  DA A  56     -32.478 -37.222 -28.880  6.00  0.00           H  
ATOM   1800 H2''  DA A  56     -29.980 -41.506 -22.900  0.00  0.00           H  
ATOM   1801 H5''  DA A  56     -31.392 -45.567 -24.670  9.00  0.00           H  
ATOM   1802  P    DA A  57     -32.945 -43.074 -21.650  6.00  0.00           P  
ATOM   1803  C5'  DA A  57     -31.209 -41.862 -20.140  1.00  0.00           C  
ATOM   1804  O5'  DA A  57     -32.316 -41.803 -21.030  4.00  0.00           O  
ATOM   1805  C4'  DA A  57     -30.638 -40.408 -19.790  4.00  0.00           C  
ATOM   1806  O4'  DA A  57     -30.457 -39.709 -20.980  7.00  0.00           O  
ATOM   1807  C3'  DA A  57     -31.554 -39.728 -18.820  7.00  0.00           C  
ATOM   1808  O3'  DA A  57     -30.814 -38.854 -18.020  1.00  0.00           O  
ATOM   1809  C2'  DA A  57     -32.399 -38.861 -19.780  8.00  0.00           C  
ATOM   1810  C1'  DA A  57     -31.230 -38.521 -20.790  1.00  0.00           C  
ATOM   1811  N1   DA A  57     -31.325 -34.508 -24.040  9.00  0.00           N  
ATOM   1812  C2   DA A  57     -30.765 -34.736 -22.900  0.00  0.00           C  
ATOM   1813  N3   DA A  57     -30.792 -35.820 -22.100  8.00  0.00           N  
ATOM   1814  C4   DA A  57     -31.516 -36.831 -22.650  1.00  0.00           C  
ATOM   1815  C5   DA A  57     -32.292 -36.781 -23.780  8.00  0.00           C  
ATOM   1816  C6   DA A  57     -32.072 -35.509 -24.500  2.00  0.00           C  
ATOM   1817  N6   DA A  57     -32.748 -35.036 -25.530  8.00  0.00           N  
ATOM   1818  N7   DA A  57     -33.009 -37.948 -24.000  0.00  0.00           N  
ATOM   1819  C8   DA A  57     -32.722 -38.618 -22.910  6.00  0.00           C  
ATOM   1820  N9   DA A  57     -31.781 -38.071 -22.080  2.00  0.00           N  
ATOM   1821  OP1  DA A  57     -33.033 -44.194 -20.640  5.00  0.00           O  
ATOM   1822  OP2  DA A  57     -34.130 -42.673 -22.450  2.00  0.00           O1-
ATOM   1823  H2   DA A  57     -30.185 -33.844 -22.470  6.00  0.00           H  
ATOM   1824  H8   DA A  57     -33.031 -39.644 -22.720  6.00  0.00           H  
ATOM   1825  H1'  DA A  57     -30.491 -37.793 -20.410  4.00  0.00           H  
ATOM   1826  H2'  DA A  57     -33.216 -39.419 -20.170  8.00  0.00           H  
ATOM   1827  H3'  DA A  57     -32.174 -40.404 -18.170  8.00  0.00           H  
ATOM   1828  H4'  DA A  57     -29.667 -40.657 -19.360  2.00  0.00           H  
ATOM   1829  H5'  DA A  57     -30.405 -42.352 -20.750  5.00  0.00           H  
ATOM   1830  H61  DA A  57     -32.745 -34.050 -25.770  7.00  0.00           H  
ATOM   1831  H62  DA A  57     -33.646 -35.520 -25.680  3.00  0.00           H  
ATOM   1832 H2''  DA A  57     -32.825 -38.008 -19.270  5.00  0.00           H  
ATOM   1833 H5''  DA A  57     -31.349 -42.428 -19.250  4.00  0.00           H  
ATOM   1834  P   DCP A  58     -30.961 -38.871 -16.360  7.00  0.00           P  
ATOM   1835  C5' DCP A  58     -32.718 -36.918 -16.400  9.00  0.00           C  
ATOM   1836  O5' DCP A  58     -32.406 -38.220 -16.030  4.00  0.00           O  
ATOM   1837  C4' DCP A  58     -34.144 -36.564 -15.930  1.00  0.00           C  
ATOM   1838  O4' DCP A  58     -35.188 -37.476 -16.460  5.00  0.00           O  
ATOM   1839  C3' DCP A  58     -34.284 -36.484 -14.380  7.00  0.00           C  
ATOM   1840  O3' DCP A  58     -35.041 -35.411 -13.900  0.00  0.00           O  
ATOM   1841  C2' DCP A  58     -34.983 -37.789 -14.110  5.00  0.00           C  
ATOM   1842  C1' DCP A  58     -35.526 -38.358 -15.390  1.00  0.00           C  
ATOM   1843  N1  DCP A  58     -35.152 -39.839 -15.520  2.00  0.00           N  
ATOM   1844  C2  DCP A  58     -35.864 -40.732 -14.690  7.00  0.00           C  
ATOM   1845  O2  DCP A  58     -36.587 -40.371 -13.730  7.00  0.00           O  
ATOM   1846  N3  DCP A  58     -35.750 -42.064 -14.840  2.00  0.00           N  
ATOM   1847  C4  DCP A  58     -34.955 -42.551 -15.860  1.00  0.00           C  
ATOM   1848  N4  DCP A  58     -34.801 -43.830 -15.950  5.00  0.00           N  
ATOM   1849  C5  DCP A  58     -34.223 -41.652 -16.690  0.00  0.00           C  
ATOM   1850  C6  DCP A  58     -34.305 -40.322 -16.480  5.00  0.00           C  
ATOM   1851  OP1 DCP A  58     -29.918 -37.988 -15.810  8.00  0.00           O  
ATOM   1852  OP2 DCP A  58     -30.935 -40.299 -15.940  9.00  0.00           O  
ATOM   1853  H3  DCP A  58     -36.249 -42.590 -14.220  9.00  0.00           H  
ATOM   1854  H5  DCP A  58     -33.625 -42.070 -17.400  9.00  0.00           H  
ATOM   1855  H6  DCP A  58     -33.855 -39.632 -17.190  3.00  0.00           H  
ATOM   1856  H1' DCP A  58     -36.582 -38.357 -15.250  1.00  0.00           H  
ATOM   1857  H2' DCP A  58     -34.264 -38.493 -13.650  6.00  0.00           H  
ATOM   1858  H3' DCP A  58     -33.308 -36.609 -13.930  6.00  0.00           H  
ATOM   1859  H4' DCP A  58     -34.293 -35.584 -16.300  7.00  0.00           H  
ATOM   1860  H41 DCP A  58     -35.272 -44.520 -15.350  3.00  0.00           H  
ATOM   1861  H5' DCP A  58     -32.644 -36.666 -17.490  6.00  0.00           H  
ATOM   1862  H42 DCP A  58     -34.314 -44.209 -16.720  7.00  0.00           H  
ATOM   1863 H2'' DCP A  58     -35.642 -37.695 -13.250  8.00  0.00           H  
ATOM   1864 H5'' DCP A  58     -32.014 -36.258 -15.910  4.00  0.00           H  
ATOM   1865  P   DCP A  59     -34.412 -33.935 -13.950  0.00  0.00           P  
ATOM   1866  C5' DCP A  59     -31.937 -34.109 -13.070  7.00  0.00           C  
ATOM   1867  O5' DCP A  59     -33.314 -33.936 -12.810  9.00  0.00           O  
ATOM   1868  C4' DCP A  59     -31.321 -34.894 -11.900  7.00  0.00           C  
ATOM   1869  O4' DCP A  59     -31.499 -36.319 -12.000  0.00  0.00           O  
ATOM   1870  C3' DCP A  59     -29.818 -34.697 -11.680  9.00  0.00           C  
ATOM   1871  O3' DCP A  59     -29.578 -33.633 -10.820  3.00  0.00           O  
ATOM   1872  C2' DCP A  59     -29.389 -36.036 -11.040  0.00  0.00           C  
ATOM   1873  C1' DCP A  59     -30.617 -36.965 -11.060  6.00  0.00           C  
ATOM   1874  N1  DCP A  59     -30.358 -38.367 -11.490  5.00  0.00           N  
ATOM   1875  C2  DCP A  59     -30.679 -39.361 -10.600  0.00  0.00           C  
ATOM   1876  O2  DCP A  59     -31.142 -39.142  -9.510  5.00  0.00           O  
ATOM   1877  N3  DCP A  59     -30.390 -40.643 -10.820  3.00  0.00           N  
ATOM   1878  C4  DCP A  59     -29.808 -40.998 -11.970  3.00  0.00           C  
ATOM   1879  N4  DCP A  59     -29.512 -42.263 -12.190  3.00  0.00           N  
ATOM   1880  C5  DCP A  59     -29.429 -40.015 -13.010  5.00  0.00           C  
ATOM   1881  C6  DCP A  59     -29.795 -38.718 -12.720  0.00  0.00           C  
ATOM   1882  OP1 DCP A  59     -35.474 -33.017 -13.360  2.00  0.00           O  
ATOM   1883  OP2 DCP A  59     -33.812 -33.506 -15.220  8.00  0.00           O  
ATOM   1884  H3  DCP A  59     -30.767 -41.327 -10.160  4.00  0.00           H  
ATOM   1885  H5  DCP A  59     -28.967 -40.325 -13.940  2.00  0.00           H  
ATOM   1886  H6  DCP A  59     -29.543 -37.992 -13.480  5.00  0.00           H  
ATOM   1887  H1' DCP A  59     -31.038 -37.032 -10.070  5.00  0.00           H  
ATOM   1888  H2' DCP A  59     -28.639 -36.462 -11.540  8.00  0.00           H  
ATOM   1889  H3' DCP A  59     -29.398 -34.508 -12.640  2.00  0.00           H  
ATOM   1890  H4' DCP A  59     -31.859 -34.572 -11.010  4.00  0.00           H  
ATOM   1891  H41 DCP A  59     -29.628 -42.870 -11.360  0.00  0.00           H  
ATOM   1892  H5' DCP A  59     -31.441 -33.193 -13.200  9.00  0.00           H  
ATOM   1893  H42 DCP A  59     -28.882 -42.493 -12.920  6.00  0.00           H  
ATOM   1894 H2'' DCP A  59     -29.048 -35.929 -10.020  3.00  0.00           H  
ATOM   1895 H5'' DCP A  59     -31.907 -34.632 -14.030  0.00  0.00           H  
ATOM   1896  P   DCP A  60     -28.140 -32.939 -10.610  1.00  0.00           P  
ATOM   1897  C5' DCP A  60     -27.954 -33.324  -8.000  1.00  0.00           C  
ATOM   1898  O5' DCP A  60     -27.413 -33.562  -9.280  0.00  0.00           O  
ATOM   1899  C4' DCP A  60     -27.116 -34.061  -6.980  0.00  0.00           C  
ATOM   1900  O4' DCP A  60     -27.056 -35.498  -7.290  7.00  0.00           O  
ATOM   1901  C3' DCP A  60     -25.677 -33.660  -6.940  1.00  0.00           C  
ATOM   1902  O3' DCP A  60     -25.534 -32.541  -6.040  8.00  0.00           O  
ATOM   1903  C2' DCP A  60     -25.077 -34.866  -6.150  1.00  0.00           C  
ATOM   1904  C1' DCP A  60     -25.985 -36.010  -6.490  5.00  0.00           C  
ATOM   1905  N1  DCP A  60     -25.330 -37.207  -7.100  1.00  0.00           N  
ATOM   1906  C2  DCP A  60     -25.391 -38.409  -6.410  3.00  0.00           C  
ATOM   1907  O2  DCP A  60     -25.999 -38.529  -5.390  0.00  0.00           O  
ATOM   1908  N3  DCP A  60     -24.917 -39.508  -6.970  5.00  0.00           N  
ATOM   1909  C4  DCP A  60     -24.504 -39.552  -8.240  5.00  0.00           C  
ATOM   1910  N4  DCP A  60     -24.206 -40.681  -8.760  6.00  0.00           N  
ATOM   1911  C5  DCP A  60     -24.355 -38.310  -8.960  0.00  0.00           C  
ATOM   1912  C6  DCP A  60     -24.803 -37.168  -8.340  9.00  0.00           C  
ATOM   1913  OP1 DCP A  60     -28.459 -31.505 -10.410  5.00  0.00           O  
ATOM   1914  OP2 DCP A  60     -27.275 -33.365 -11.680  1.00  0.00           O  
ATOM   1915  H3  DCP A  60     -24.984 -40.301  -6.350  8.00  0.00           H  
ATOM   1916  H5  DCP A  60     -23.948 -38.243  -9.970  0.00  0.00           H  
ATOM   1917  H6  DCP A  60     -24.685 -36.194  -8.900  4.00  0.00           H  
ATOM   1918  H1' DCP A  60     -26.335 -36.223  -5.470  4.00  0.00           H  
ATOM   1919  H2' DCP A  60     -24.026 -35.053  -6.450  6.00  0.00           H  
ATOM   1920  H3' DCP A  60     -25.336 -33.629  -7.980  7.00  0.00           H  
ATOM   1921  H4' DCP A  60     -27.657 -33.980  -6.040  0.00  0.00           H  
ATOM   1922  H41 DCP A  60     -24.399 -41.575  -8.270  0.00  0.00           H  
ATOM   1923  H5' DCP A  60     -28.898 -33.750  -7.990  2.00  0.00           H  
ATOM   1924  H42 DCP A  60     -24.031 -40.627  -9.790  3.00  0.00           H  
ATOM   1925 H2'' DCP A  60     -25.010 -34.647  -5.070  3.00  0.00           H  
ATOM   1926 H5'' DCP A  60     -28.004 -32.306  -7.740  6.00  0.00           H  
ATOM   1927  P    DT A  61     -24.493 -31.403  -6.450  6.00  0.00           P  
ATOM   1928  C5'  DT A  61     -21.892 -31.580  -6.580  8.00  0.00           C  
ATOM   1929  O5'  DT A  61     -23.113 -32.164  -6.160  9.00  0.00           O  
ATOM   1930  C4'  DT A  61     -20.711 -32.341  -5.980  5.00  0.00           C  
ATOM   1931  O4'  DT A  61     -20.765 -32.254  -4.570  3.00  0.00           O  
ATOM   1932  C3'  DT A  61     -20.584 -33.841  -6.330  4.00  0.00           C  
ATOM   1933  O3'  DT A  61     -19.283 -34.141  -6.660  1.00  0.00           O  
ATOM   1934  C2'  DT A  61     -21.022 -34.484  -5.070  8.00  0.00           C  
ATOM   1935  C1'  DT A  61     -20.596 -33.485  -3.980  7.00  0.00           C  
ATOM   1936  N1   DT A  61     -21.556 -33.621  -2.880  1.00  0.00           N  
ATOM   1937  C2   DT A  61     -21.150 -34.075  -1.630  6.00  0.00           C  
ATOM   1938  O2   DT A  61     -20.002 -34.378  -1.350  1.00  0.00           O  
ATOM   1939  N3   DT A  61     -22.121 -34.356  -0.670  4.00  0.00           N  
ATOM   1940  C4   DT A  61     -23.451 -34.127  -0.870  3.00  0.00           C  
ATOM   1941  O4   DT A  61     -24.233 -34.488  -0.000  5.00  0.00           O  
ATOM   1942  C5   DT A  61     -23.787 -33.383  -2.100  3.00  0.00           C  
ATOM   1943  C6   DT A  61     -22.841 -33.184  -3.020  7.00  0.00           C  
ATOM   1944  C7   DT A  61     -25.239 -32.839  -2.230  4.00  0.00           C  
ATOM   1945  OP1  DT A  61     -24.619 -30.363  -5.420  8.00  0.00           O  
ATOM   1946  OP2  DT A  61     -24.726 -31.015  -7.860  1.00  0.00           O1-
ATOM   1947  H3   DT A  61     -21.806 -34.867   0.110  5.00  0.00           H  
ATOM   1948  H6   DT A  61     -23.141 -32.593  -3.850  0.00  0.00           H  
ATOM   1949  H1'  DT A  61     -19.581 -33.623  -3.670  9.00  0.00           H  
ATOM   1950  H2'  DT A  61     -22.133 -34.592  -5.230  2.00  0.00           H  
ATOM   1951  H3'  DT A  61     -21.305 -34.070  -7.180  9.00  0.00           H  
ATOM   1952  H4'  DT A  61     -19.736 -31.903  -6.410  3.00  0.00           H  
ATOM   1953  H5'  DT A  61     -21.893 -30.484  -6.250  8.00  0.00           H  
ATOM   1954  H71  DT A  61     -25.789 -33.652  -2.640  9.00  0.00           H  
ATOM   1955  H72  DT A  61     -25.248 -32.021  -2.920  4.00  0.00           H  
ATOM   1956  H73  DT A  61     -25.606 -32.478  -1.270  5.00  0.00           H  
ATOM   1957 H2''  DT A  61     -20.699 -35.539  -4.940  4.00  0.00           H  
ATOM   1958 H5''  DT A  61     -21.767 -31.584  -7.660  4.00  0.00           H  
ATOM   1959  P    DA A  62     -18.925 -35.692  -7.120  0.00  0.00           P  
ATOM   1960  C5'  DA A  62     -17.111 -35.949  -5.160  1.00  0.00           C  
ATOM   1961  O5'  DA A  62     -18.308 -36.373  -5.790  5.00  0.00           O  
ATOM   1962  C4'  DA A  62     -16.722 -36.898  -4.000  5.00  0.00           C  
ATOM   1963  O4'  DA A  62     -17.761 -36.899  -2.980  1.00  0.00           O  
ATOM   1964  C3'  DA A  62     -16.699 -38.398  -4.380  4.00  0.00           C  
ATOM   1965  O3'  DA A  62     -15.529 -39.026  -4.080  0.00  0.00           O  
ATOM   1966  C2'  DA A  62     -17.897 -39.001  -3.690  4.00  0.00           C  
ATOM   1967  C1'  DA A  62     -17.820 -38.209  -2.390  8.00  0.00           C  
ATOM   1968  N1   DA A  62     -19.863 -36.052   1.970  6.00  0.00           N  
ATOM   1969  C2   DA A  62     -18.621 -36.034   1.430  2.00  0.00           C  
ATOM   1970  N3   DA A  62     -18.090 -36.706   0.430  0.00  0.00           N  
ATOM   1971  C4   DA A  62     -18.975 -37.505  -0.260  9.00  0.00           C  
ATOM   1972  C5   DA A  62     -20.266 -37.647   0.140  5.00  0.00           C  
ATOM   1973  C6   DA A  62     -20.704 -36.910   1.250  6.00  0.00           C  
ATOM   1974  N6   DA A  62     -22.030 -36.710   1.590  2.00  0.00           N  
ATOM   1975  N7   DA A  62     -20.972 -38.523  -0.640  4.00  0.00           N  
ATOM   1976  C8   DA A  62     -20.039 -38.853  -1.530  3.00  0.00           C  
ATOM   1977  N9   DA A  62     -18.850 -38.214  -1.400  1.00  0.00           N  
ATOM   1978  OP1  DA A  62     -17.857 -35.505  -8.120  5.00  0.00           O  
ATOM   1979  OP2  DA A  62     -20.118 -36.474  -7.410  4.00  0.00           O1-
ATOM   1980  H2   DA A  62     -17.876 -35.502   1.930  3.00  0.00           H  
ATOM   1981  H8   DA A  62     -20.352 -39.568  -2.360  1.00  0.00           H  
ATOM   1982  H1'  DA A  62     -16.907 -38.417  -1.900  7.00  0.00           H  
ATOM   1983  H2'  DA A  62     -18.854 -38.846  -4.210  4.00  0.00           H  
ATOM   1984  H3'  DA A  62     -16.910 -38.540  -5.470  2.00  0.00           H  
ATOM   1985  H4'  DA A  62     -15.873 -36.541  -3.510  1.00  0.00           H  
ATOM   1986  H5'  DA A  62     -17.069 -34.872  -4.730  9.00  0.00           H  
ATOM   1987  H61  DA A  62     -22.323 -35.935   2.190  5.00  0.00           H  
ATOM   1988  H62  DA A  62     -22.800 -37.122   1.000  3.00  0.00           H  
ATOM   1989 H2''  DA A  62     -17.793 -39.967  -3.340  0.00  0.00           H  
ATOM   1990 H5''  DA A  62     -16.260 -36.004  -5.800  6.00  0.00           H  
ATOM   1991  P    DA A  63     -14.247 -38.957  -5.090  4.00  0.00           P  
ATOM   1992  C5'  DA A  63     -13.643 -40.893  -6.870  5.00  0.00           C  
ATOM   1993  O5'  DA A  63     -14.616 -40.244  -6.010  5.00  0.00           O  
ATOM   1994  C4'  DA A  63     -14.297 -42.130  -7.610  8.00  0.00           C  
ATOM   1995  O4'  DA A  63     -14.858 -43.092  -6.770  3.00  0.00           O  
ATOM   1996  C3'  DA A  63     -15.525 -41.749  -8.530  4.00  0.00           C  
ATOM   1997  O3'  DA A  63     -15.515 -42.609  -9.680  3.00  0.00           O  
ATOM   1998  C2'  DA A  63     -16.736 -41.999  -7.560  1.00  0.00           C  
ATOM   1999  C1'  DA A  63     -16.303 -43.225  -6.860  7.00  0.00           C  
ATOM   2000  N1   DA A  63     -20.132 -45.395  -4.270  4.00  0.00           N  
ATOM   2001  C2   DA A  63     -19.656 -45.481  -5.530  0.00  0.00           C  
ATOM   2002  N3   DA A  63     -18.647 -44.851  -6.190  9.00  0.00           N  
ATOM   2003  C4   DA A  63     -18.157 -43.968  -5.340  6.00  0.00           C  
ATOM   2004  C5   DA A  63     -18.448 -43.667  -4.080  5.00  0.00           C  
ATOM   2005  C6   DA A  63     -19.536 -44.472  -3.540  9.00  0.00           C  
ATOM   2006  N6   DA A  63     -20.083 -44.401  -2.320  7.00  0.00           N  
ATOM   2007  N7   DA A  63     -17.607 -42.683  -3.580  7.00  0.00           N  
ATOM   2008  C8   DA A  63     -16.724 -42.513  -4.450  9.00  0.00           C  
ATOM   2009  N9   DA A  63     -17.000 -43.221  -5.570  7.00  0.00           N  
ATOM   2010  OP1  DA A  63     -12.993 -39.218  -4.370  1.00  0.00           O  
ATOM   2011  OP2  DA A  63     -14.359 -37.726  -5.920  2.00  0.00           O1-
ATOM   2012  H2   DA A  63     -20.083 -46.306  -6.040  3.00  0.00           H  
ATOM   2013  H8   DA A  63     -15.863 -41.844  -4.440  1.00  0.00           H  
ATOM   2014  H1'  DA A  63     -16.668 -44.031  -7.490  1.00  0.00           H  
ATOM   2015  H2'  DA A  63     -16.845 -41.223  -6.870  5.00  0.00           H  
ATOM   2016  H3'  DA A  63     -15.536 -40.719  -8.790  0.00  0.00           H  
ATOM   2017  H4'  DA A  63     -13.558 -42.651  -8.250  5.00  0.00           H  
ATOM   2018  H5'  DA A  63     -12.825 -41.314  -6.270  4.00  0.00           H  
ATOM   2019  H61  DA A  63     -20.968 -44.969  -2.150  0.00  0.00           H  
ATOM   2020  H62  DA A  63     -19.832 -43.639  -1.780  3.00  0.00           H  
ATOM   2021 H2''  DA A  63     -17.709 -42.194  -8.110  1.00  0.00           H  
ATOM   2022 H5''  DA A  63     -13.199 -40.152  -7.640  0.00  0.00           H  
ATOM   2023  P   DCP A  64     -16.398 -42.272 -10.970  9.00  0.00           P  
ATOM   2024  C5' DCP A  64     -18.184 -44.115 -10.560  0.00  0.00           C  
ATOM   2025  O5' DCP A  64     -17.894 -42.733 -10.590  2.00  0.00           O  
ATOM   2026  C4' DCP A  64     -19.603 -44.380  -9.900  6.00  0.00           C  
ATOM   2027  O4' DCP A  64     -19.771 -43.915  -8.630  3.00  0.00           O  
ATOM   2028  C3' DCP A  64     -20.726 -43.713 -10.760  8.00  0.00           C  
ATOM   2029  O3' DCP A  64     -21.239 -44.650 -11.740  7.00  0.00           O  
ATOM   2030  C2' DCP A  64     -21.813 -43.345  -9.710  8.00  0.00           C  
ATOM   2031  C1' DCP A  64     -21.084 -43.547  -8.400  8.00  0.00           C  
ATOM   2032  N1  DCP A  64     -20.971 -42.287  -7.630  4.00  0.00           N  
ATOM   2033  C2  DCP A  64     -21.534 -42.090  -6.360  5.00  0.00           C  
ATOM   2034  O2  DCP A  64     -22.006 -43.035  -5.770  4.00  0.00           O  
ATOM   2035  N3  DCP A  64     -21.692 -40.860  -5.810  9.00  0.00           N  
ATOM   2036  C4  DCP A  64     -21.076 -39.840  -6.400  5.00  0.00           C  
ATOM   2037  N4  DCP A  64     -21.205 -38.672  -5.800  6.00  0.00           N  
ATOM   2038  C5  DCP A  64     -20.346 -40.040  -7.650  4.00  0.00           C  
ATOM   2039  C6  DCP A  64     -20.373 -41.271  -8.190  8.00  0.00           C  
ATOM   2040  OP1 DCP A  64     -15.881 -43.025 -12.110  7.00  0.00           O  
ATOM   2041  OP2 DCP A  64     -16.523 -40.798 -11.260  1.00  0.00           O  
ATOM   2042  H3  DCP A  64     -22.243 -40.705  -4.930  7.00  0.00           H  
ATOM   2043  H5  DCP A  64     -19.909 -39.119  -8.100  0.00  0.00           H  
ATOM   2044  H6  DCP A  64     -19.979 -41.447  -9.170  9.00  0.00           H  
ATOM   2045  H1' DCP A  64     -21.565 -44.323  -7.730  1.00  0.00           H  
ATOM   2046  H2' DCP A  64     -22.072 -42.319  -9.990  3.00  0.00           H  
ATOM   2047  H3' DCP A  64     -20.286 -42.829 -11.160  8.00  0.00           H  
ATOM   2048  H4' DCP A  64     -19.738 -45.509  -9.760  8.00  0.00           H  
ATOM   2049  H41 DCP A  64     -21.844 -38.543  -5.040  9.00  0.00           H  
ATOM   2050  H5' DCP A  64     -17.496 -44.574  -9.880  7.00  0.00           H  
ATOM   2051  H42 DCP A  64     -20.795 -37.889  -6.260  4.00  0.00           H  
ATOM   2052 H2'' DCP A  64     -22.637 -44.028  -9.800  1.00  0.00           H  
ATOM   2053 H5'' DCP A  64     -17.998 -44.569 -11.540  7.00  0.00           H  
ATOM   2054  P   DCP A  65     -22.445 -44.448 -12.810  2.00  0.00           P  
ATOM   2055  C5' DCP A  65     -23.770 -46.434 -11.880  6.00  0.00           C  
ATOM   2056  O5' DCP A  65     -23.741 -45.065 -12.150  3.00  0.00           O  
ATOM   2057  C4' DCP A  65     -25.086 -46.924 -11.150  1.00  0.00           C  
ATOM   2058  O4' DCP A  65     -25.325 -46.138  -9.990  7.00  0.00           O  
ATOM   2059  C3' DCP A  65     -26.314 -46.700 -12.050  4.00  0.00           C  
ATOM   2060  O3' DCP A  65     -26.610 -47.785 -12.880  8.00  0.00           O  
ATOM   2061  C2' DCP A  65     -27.368 -46.418 -11.010  4.00  0.00           C  
ATOM   2062  C1' DCP A  65     -26.640 -45.655  -9.900  9.00  0.00           C  
ATOM   2063  N1  DCP A  65     -26.642 -44.155  -9.910  8.00  0.00           N  
ATOM   2064  C2  DCP A  65     -27.231 -43.450  -8.860  3.00  0.00           C  
ATOM   2065  O2  DCP A  65     -27.733 -44.078  -7.930  6.00  0.00           O  
ATOM   2066  N3  DCP A  65     -27.337 -42.084  -8.920  7.00  0.00           N  
ATOM   2067  C4  DCP A  65     -27.045 -41.355 -10.020  5.00  0.00           C  
ATOM   2068  N4  DCP A  65     -27.316 -40.039 -10.110  1.00  0.00           N  
ATOM   2069  C5  DCP A  65     -26.494 -42.012 -11.100  4.00  0.00           C  
ATOM   2070  C6  DCP A  65     -26.304 -43.370 -11.000  8.00  0.00           C  
ATOM   2071  OP1 DCP A  65     -22.092 -45.290 -13.970  9.00  0.00           O  
ATOM   2072  OP2 DCP A  65     -22.670 -43.023 -13.060  9.00  0.00           O  
ATOM   2073  H3  DCP A  65     -27.945 -41.608  -8.230  2.00  0.00           H  
ATOM   2074  H5  DCP A  65     -26.334 -41.500 -12.040  1.00  0.00           H  
ATOM   2075  H6  DCP A  65     -25.979 -43.865 -11.880  9.00  0.00           H  
ATOM   2076  H1' DCP A  65     -27.060 -46.030  -8.990  9.00  0.00           H  
ATOM   2077  H2' DCP A  65     -28.242 -45.825 -11.400  1.00  0.00           H  
ATOM   2078  H3' DCP A  65     -26.201 -45.816 -12.660  3.00  0.00           H  
ATOM   2079  H4' DCP A  65     -25.074 -47.982 -10.870  1.00  0.00           H  
ATOM   2080  H41 DCP A  65     -27.546 -39.576  -9.320  3.00  0.00           H  
ATOM   2081  H5' DCP A  65     -22.919 -46.617 -11.280  8.00  0.00           H  
ATOM   2082  H42 DCP A  65     -26.993 -39.538 -10.950  3.00  0.00           H  
ATOM   2083 H2'' DCP A  65     -27.795 -47.304 -10.590  7.00  0.00           H  
ATOM   2084 H5'' DCP A  65     -23.795 -46.941 -12.800  7.00  0.00           H  
ATOM   2085  P   DCP A  66     -27.571 -47.707 -14.130  5.00  0.00           P  
ATOM   2086  C5' DCP A  66     -29.715 -48.867 -13.000  1.00  0.00           C  
ATOM   2087  O5' DCP A  66     -29.119 -47.771 -13.670  6.00  0.00           O  
ATOM   2088  C4' DCP A  66     -31.098 -48.360 -12.530  1.00  0.00           C  
ATOM   2089  O4' DCP A  66     -31.230 -47.015 -12.100  4.00  0.00           O  
ATOM   2090  C3' DCP A  66     -32.068 -48.412 -13.710  6.00  0.00           C  
ATOM   2091  O3' DCP A  66     -32.669 -49.660 -13.820  3.00  0.00           O  
ATOM   2092  C2' DCP A  66     -33.205 -47.526 -13.330  2.00  0.00           C  
ATOM   2093  C1' DCP A  66     -32.605 -46.544 -12.250  9.00  0.00           C  
ATOM   2094  N1  DCP A  66     -32.617 -45.155 -12.780  2.00  0.00           N  
ATOM   2095  C2  DCP A  66     -33.132 -44.144 -11.950  0.00  0.00           C  
ATOM   2096  O2  DCP A  66     -33.768 -44.411 -10.930  6.00  0.00           O  
ATOM   2097  N3  DCP A  66     -33.016 -42.861 -12.280  3.00  0.00           N  
ATOM   2098  C4  DCP A  66     -32.398 -42.544 -13.420  8.00  0.00           C  
ATOM   2099  N4  DCP A  66     -32.256 -41.299 -13.770  1.00  0.00           N  
ATOM   2100  C5  DCP A  66     -31.914 -43.546 -14.370  9.00  0.00           C  
ATOM   2101  C6  DCP A  66     -32.005 -44.847 -13.970  9.00  0.00           C  
ATOM   2102  OP1 DCP A  66     -27.248 -48.812 -15.060  7.00  0.00           O  
ATOM   2103  OP2 DCP A  66     -27.628 -46.352 -14.810  0.00  0.00           O  
ATOM   2104  H3  DCP A  66     -33.114 -42.100 -11.520  7.00  0.00           H  
ATOM   2105  H5  DCP A  66     -31.351 -43.303 -15.310  1.00  0.00           H  
ATOM   2106  H6  DCP A  66     -31.545 -45.652 -14.500  9.00  0.00           H  
ATOM   2107  H1' DCP A  66     -33.120 -46.675 -11.280  9.00  0.00           H  
ATOM   2108  H2' DCP A  66     -33.623 -46.995 -14.200  7.00  0.00           H  
ATOM   2109  H3' DCP A  66     -31.732 -48.100 -14.650  7.00  0.00           H  
ATOM   2110  H4' DCP A  66     -31.496 -49.116 -11.830  5.00  0.00           H  
ATOM   2111  H41 DCP A  66     -32.621 -40.635 -13.150  7.00  0.00           H  
ATOM   2112  H5' DCP A  66     -29.171 -49.223 -12.040  6.00  0.00           H  
ATOM   2113  H42 DCP A  66     -31.739 -40.969 -14.700  3.00  0.00           H  
ATOM   2114 H2'' DCP A  66     -34.042 -48.088 -12.750  6.00  0.00           H  
ATOM   2115 H5'' DCP A  66     -29.903 -49.693 -13.700  5.00  0.00           H  
ATOM   2116  P    DT A  67     -33.153 -50.215 -15.230  6.00  0.00           P  
ATOM   2117  C5'  DT A  67     -35.532 -49.759 -16.240  3.00  0.00           C  
ATOM   2118  O5'  DT A  67     -34.576 -49.503 -15.240  5.00  0.00           O  
ATOM   2119  C4'  DT A  67     -36.964 -49.475 -15.860  4.00  0.00           C  
ATOM   2120  O4'  DT A  67     -37.123 -48.045 -15.800  6.00  0.00           O  
ATOM   2121  C3'  DT A  67     -37.954 -49.918 -16.940  0.00  0.00           C  
ATOM   2122  O3'  DT A  67     -39.233 -50.259 -16.380  0.00  0.00           O  
ATOM   2123  C2'  DT A  67     -38.027 -48.715 -17.860  4.00  0.00           C  
ATOM   2124  C1'  DT A  67     -38.145 -47.648 -16.770  6.00  0.00           C  
ATOM   2125  N1   DT A  67     -38.109 -46.185 -17.200  7.00  0.00           N  
ATOM   2126  C2   DT A  67     -38.594 -45.275 -16.240  4.00  0.00           C  
ATOM   2127  O2   DT A  67     -39.180 -45.623 -15.170  5.00  0.00           O  
ATOM   2128  N3   DT A  67     -38.389 -43.887 -16.530  5.00  0.00           N  
ATOM   2129  C4   DT A  67     -37.695 -43.372 -17.620  2.00  0.00           C  
ATOM   2130  O4   DT A  67     -37.503 -42.130 -17.670  3.00  0.00           O  
ATOM   2131  C5   DT A  67     -37.284 -44.365 -18.590  6.00  0.00           C  
ATOM   2132  C6   DT A  67     -37.397 -45.725 -18.290  6.00  0.00           C  
ATOM   2133  C7   DT A  67     -36.546 -43.909 -19.840  5.00  0.00           C  
ATOM   2134  OP1  DT A  67     -33.368 -51.650 -14.980  4.00  0.00           O  
ATOM   2135  OP2  DT A  67     -32.228 -49.791 -16.200  7.00  0.00           O1-
ATOM   2136  H3   DT A  67     -38.821 -43.311 -15.810  6.00  0.00           H  
ATOM   2137  H6   DT A  67     -36.920 -46.479 -18.950  6.00  0.00           H  
ATOM   2138  H1'  DT A  67     -39.115 -47.816 -16.310  3.00  0.00           H  
ATOM   2139  H2'  DT A  67     -37.163 -48.699 -18.620  5.00  0.00           H  
ATOM   2140  H3'  DT A  67     -37.529 -50.854 -17.460  7.00  0.00           H  
ATOM   2141  H4'  DT A  67     -37.170 -49.936 -14.910  6.00  0.00           H  
ATOM   2142  H5'  DT A  67     -35.527 -50.815 -16.610  1.00  0.00           H  
ATOM   2143  H71  DT A  67     -35.784 -43.175 -19.670  1.00  0.00           H  
ATOM   2144  H72  DT A  67     -37.321 -43.630 -20.530  0.00  0.00           H  
ATOM   2145  H73  DT A  67     -35.995 -44.614 -20.300  5.00  0.00           H  
ATOM   2146 H2''  DT A  67     -38.944 -48.846 -18.400  2.00  0.00           H  
ATOM   2147 H5''  DT A  67     -35.280 -49.257 -17.200  6.00  0.00           H  
ATOM   2148  P    DA A  68     -40.265 -51.124 -17.290  1.00  0.00           P  
ATOM   2149  C5'  DA A  68     -42.305 -49.446 -18.000  1.00  0.00           C  
ATOM   2150  O5'  DA A  68     -41.104 -50.129 -18.310  7.00  0.00           O  
ATOM   2151  C4'  DA A  68     -42.131 -48.413 -16.900  0.00  0.00           C  
ATOM   2152  O4'  DA A  68     -41.197 -47.386 -17.270  5.00  0.00           O  
ATOM   2153  C3'  DA A  68     -43.418 -47.648 -16.550  7.00  0.00           C  
ATOM   2154  O3'  DA A  68     -43.487 -47.184 -15.270  7.00  0.00           O  
ATOM   2155  C2'  DA A  68     -43.424 -46.525 -17.600  9.00  0.00           C  
ATOM   2156  C1'  DA A  68     -41.951 -46.199 -17.530  8.00  0.00           C  
ATOM   2157  N1   DA A  68     -40.716 -41.446 -19.040  5.00  0.00           N  
ATOM   2158  C2   DA A  68     -41.274 -41.891 -17.950  9.00  0.00           C  
ATOM   2159  N3   DA A  68     -41.538 -43.145 -17.600  5.00  0.00           N  
ATOM   2160  C4   DA A  68     -41.196 -44.011 -18.620  6.00  0.00           C  
ATOM   2161  C5   DA A  68     -40.630 -43.707 -19.830  9.00  0.00           C  
ATOM   2162  C6   DA A  68     -40.447 -42.335 -20.000  1.00  0.00           C  
ATOM   2163  N6   DA A  68     -39.976 -41.701 -21.080  8.00  0.00           N  
ATOM   2164  N7   DA A  68     -40.434 -44.949 -20.580  8.00  0.00           N  
ATOM   2165  C8   DA A  68     -40.771 -45.922 -19.760  0.00  0.00           C  
ATOM   2166  N9   DA A  68     -41.345 -45.401 -18.590  4.00  0.00           N  
ATOM   2167  OP1  DA A  68     -41.230 -51.675 -16.280  5.00  0.00           O  
ATOM   2168  OP2  DA A  68     -39.528 -52.004 -18.190  6.00  0.00           O1-
ATOM   2169  H2   DA A  68     -41.528 -41.100 -17.240  7.00  0.00           H  
ATOM   2170  H8   DA A  68     -40.701 -47.022 -20.030  9.00  0.00           H  
ATOM   2171  H1'  DA A  68     -41.803 -45.574 -16.640  3.00  0.00           H  
ATOM   2172  H2'  DA A  68     -43.786 -46.873 -18.530  6.00  0.00           H  
ATOM   2173  H3'  DA A  68     -44.307 -48.285 -16.650  6.00  0.00           H  
ATOM   2174  H4'  DA A  68     -41.686 -48.843 -15.920  6.00  0.00           H  
ATOM   2175  H5'  DA A  68     -42.952 -50.221 -17.630  8.00  0.00           H  
ATOM   2176  H61  DA A  68     -39.853 -40.704 -20.920  6.00  0.00           H  
ATOM   2177  H62  DA A  68     -39.476 -42.194 -21.740  9.00  0.00           H  
ATOM   2178 H2''  DA A  68     -44.053 -45.705 -17.430  3.00  0.00           H  
ATOM   2179 H5''  DA A  68     -42.652 -48.967 -18.850  0.00  0.00           H  
ATOM   2180  P    DA A  69     -44.898 -46.884 -14.560  2.00  0.00           P  
ATOM   2181  C5'  DA A  69     -44.206 -45.077 -12.750  4.00  0.00           C  
ATOM   2182  O5'  DA A  69     -44.620 -46.438 -13.050  8.00  0.00           O  
ATOM   2183  C4'  DA A  69     -42.677 -44.988 -12.970  4.00  0.00           C  
ATOM   2184  O4'  DA A  69     -42.179 -43.792 -13.570  0.00  0.00           O  
ATOM   2185  C3'  DA A  69     -41.760 -45.203 -11.790  8.00  0.00           C  
ATOM   2186  O3'  DA A  69     -41.664 -46.499 -11.370  1.00  0.00           O  
ATOM   2187  C2'  DA A  69     -40.430 -44.683 -12.240  5.00  0.00           C  
ATOM   2188  C1'  DA A  69     -40.766 -43.570 -13.260  3.00  0.00           C  
ATOM   2189  N1   DA A  69     -38.881 -39.243 -15.240  8.00  0.00           N  
ATOM   2190  C2   DA A  69     -39.123 -40.436 -15.730  5.00  0.00           C  
ATOM   2191  N3   DA A  69     -39.726 -41.477 -15.130  2.00  0.00           N  
ATOM   2192  C4   DA A  69     -40.057 -41.180 -13.880  3.00  0.00           C  
ATOM   2193  C5   DA A  69     -39.842 -40.031 -13.220  4.00  0.00           C  
ATOM   2194  C6   DA A  69     -39.241 -39.009 -14.010  1.00  0.00           C  
ATOM   2195  N6   DA A  69     -38.995 -37.822 -13.450  3.00  0.00           N  
ATOM   2196  N7   DA A  69     -40.244 -40.097 -11.860  5.00  0.00           N  
ATOM   2197  C8   DA A  69     -40.606 -41.395 -11.730  3.00  0.00           C  
ATOM   2198  N9   DA A  69     -40.493 -42.162 -12.970  8.00  0.00           N  
ATOM   2199  OP1  DA A  69     -45.567 -48.192 -14.600  2.00  0.00           O  
ATOM   2200  OP2  DA A  69     -45.482 -45.714 -15.270  8.00  0.00           O1-
ATOM   2201  H2   DA A  69     -38.933 -40.469 -16.820  9.00  0.00           H  
ATOM   2202  H8   DA A  69     -40.908 -41.883 -10.790  9.00  0.00           H  
ATOM   2203  H1'  DA A  69     -40.213 -43.862 -14.090  0.00  0.00           H  
ATOM   2204  H2'  DA A  69     -39.954 -44.251 -11.400  6.00  0.00           H  
ATOM   2205  H3'  DA A  69     -42.083 -44.537 -10.990  9.00  0.00           H  
ATOM   2206  H4'  DA A  69     -42.463 -45.902 -13.490  7.00  0.00           H  
ATOM   2207  H5'  DA A  69     -44.291 -44.958 -11.640  9.00  0.00           H  
ATOM   2208  H61  DA A  69     -38.453 -37.098 -13.990  6.00  0.00           H  
ATOM   2209  H62  DA A  69     -39.403 -37.607 -12.550  3.00  0.00           H  
ATOM   2210 H2''  DA A  69     -39.793 -45.401 -12.690  2.00  0.00           H  
ATOM   2211 H5''  DA A  69     -44.784 -44.286 -13.400  8.00  0.00           H  
ATOM   2212  P    DC A  70     -41.250 -46.811  -9.890  5.00  0.00           P  
ATOM   2213  C5'  DC A  70     -39.472 -48.476 -10.730  0.00  0.00           C  
ATOM   2214  O5'  DC A  70     -39.751 -47.349 -10.010  8.00  0.00           O  
ATOM   2215  C4'  DC A  70     -38.004 -48.593 -11.190  7.00  0.00           C  
ATOM   2216  O4'  DC A  70     -37.836 -47.629 -12.280  5.00  0.00           O  
ATOM   2217  C3'  DC A  70     -36.928 -48.307 -10.100  1.00  0.00           C  
ATOM   2218  O3'  DC A  70     -36.652 -49.521  -9.400  0.00  0.00           O  
ATOM   2219  C2'  DC A  70     -35.821 -47.727 -10.870  6.00  0.00           C  
ATOM   2220  C1'  DC A  70     -36.584 -46.978 -12.020  1.00  0.00           C  
ATOM   2221  N1   DC A  70     -36.875 -45.552 -11.630  5.00  0.00           N  
ATOM   2222  C2   DC A  70     -36.489 -44.610 -12.550  5.00  0.00           C  
ATOM   2223  O2   DC A  70     -35.833 -44.925 -13.530  3.00  0.00           O  
ATOM   2224  N3   DC A  70     -36.722 -43.248 -12.420  0.00  0.00           N  
ATOM   2225  C4   DC A  70     -37.263 -42.927 -11.280  8.00  0.00           C  
ATOM   2226  N4   DC A  70     -37.538 -41.682 -11.130  7.00  0.00           N  
ATOM   2227  C5   DC A  70     -37.650 -43.801 -10.270  4.00  0.00           C  
ATOM   2228  C6   DC A  70     -37.559 -45.151 -10.500  9.00  0.00           C  
ATOM   2229  OP1  DC A  70     -42.131 -47.884  -9.430  3.00  0.00           O  
ATOM   2230  OP2  DC A  70     -41.143 -45.580  -9.120  2.00  0.00           O1-
ATOM   2231  H5   DC A  70     -38.258 -43.379  -9.460  2.00  0.00           H  
ATOM   2232  H6   DC A  70     -38.028 -45.888  -9.790  2.00  0.00           H  
ATOM   2233  H1'  DC A  70     -36.049 -47.075 -12.980  4.00  0.00           H  
ATOM   2234  H2'  DC A  70     -35.205 -47.020 -10.200  1.00  0.00           H  
ATOM   2235  H3'  DC A  70     -37.358 -47.551  -9.450  7.00  0.00           H  
ATOM   2236  H4'  DC A  70     -37.889 -49.590 -11.670  0.00  0.00           H  
ATOM   2237  H41  DC A  70     -37.408 -40.992 -11.930  5.00  0.00           H  
ATOM   2238  H5'  DC A  70     -40.180 -48.770 -11.550  4.00  0.00           H  
ATOM   2239  H42  DC A  70     -37.985 -41.403 -10.330  0.00  0.00           H  
ATOM   2240 H2''  DC A  70     -35.184 -48.537 -11.160  0.00  0.00           H  
ATOM   2241 H5''  DC A  70     -39.644 -49.338 -10.050  1.00  0.00           H  
ATOM   2242  P    DC A  71     -35.619 -49.602  -8.240  0.00  0.00           P  
ATOM   2243  C5'  DC A  71     -33.070 -48.883  -7.900  7.00  0.00           C  
ATOM   2244  O5'  DC A  71     -34.203 -48.996  -8.760  8.00  0.00           O  
ATOM   2245  C4'  DC A  71     -31.907 -48.234  -8.590  0.00  0.00           C  
ATOM   2246  O4'  DC A  71     -32.181 -46.800  -8.700  6.00  0.00           O  
ATOM   2247  C3'  DC A  71     -30.619 -48.224  -7.780  7.00  0.00           C  
ATOM   2248  O3'  DC A  71     -29.765 -49.289  -8.200  6.00  0.00           O  
ATOM   2249  C2'  DC A  71     -29.903 -46.925  -8.100  9.00  0.00           C  
ATOM   2250  C1'  DC A  71     -30.976 -46.107  -8.820  2.00  0.00           C  
ATOM   2251  N1   DC A  71     -31.179 -44.743  -8.270  3.00  0.00           N  
ATOM   2252  C2   DC A  71     -30.762 -43.702  -9.060  8.00  0.00           C  
ATOM   2253  O2   DC A  71     -30.303 -43.955 -10.220  4.00  0.00           O  
ATOM   2254  N3   DC A  71     -31.090 -42.462  -8.720  6.00  0.00           N  
ATOM   2255  C4   DC A  71     -31.728 -42.225  -7.560  0.00  0.00           C  
ATOM   2256  N4   DC A  71     -31.986 -40.966  -7.230  5.00  0.00           N  
ATOM   2257  C5   DC A  71     -31.954 -43.270  -6.650  4.00  0.00           C  
ATOM   2258  C6   DC A  71     -31.645 -44.516  -7.030  8.00  0.00           C  
ATOM   2259  OP1  DC A  71     -35.485 -51.055  -7.880  5.00  0.00           O  
ATOM   2260  OP2  DC A  71     -36.038 -48.726  -7.250  1.00  0.00           O1-
ATOM   2261  H5   DC A  71     -32.218 -43.154  -5.650  6.00  0.00           H  
ATOM   2262  H6   DC A  71     -31.909 -45.360  -6.370  4.00  0.00           H  
ATOM   2263  H1'  DC A  71     -30.758 -46.034  -9.830  5.00  0.00           H  
ATOM   2264  H2'  DC A  71     -29.655 -46.370  -7.220  0.00  0.00           H  
ATOM   2265  H3'  DC A  71     -30.921 -48.346  -6.730  2.00  0.00           H  
ATOM   2266  H4'  DC A  71     -31.802 -48.755  -9.570  5.00  0.00           H  
ATOM   2267  H41  DC A  71     -31.794 -40.252  -7.860  3.00  0.00           H  
ATOM   2268  H5'  DC A  71     -32.772 -49.906  -7.790  9.00  0.00           H  
ATOM   2269  H42  DC A  71     -32.547 -40.773  -6.380  7.00  0.00           H  
ATOM   2270 H2''  DC A  71     -28.967 -46.960  -8.720  8.00  0.00           H  
ATOM   2271 H5''  DC A  71     -33.215 -48.352  -7.020  0.00  0.00           H  
ATOM   2272  P    DC A  72     -28.438 -49.806  -7.420  5.00  0.00           P  
ATOM   2273  C5'  DC A  72     -26.077 -48.847  -7.100  9.00  0.00           C  
ATOM   2274  O5'  DC A  72     -27.288 -48.761  -7.790  2.00  0.00           O  
ATOM   2275  C4'  DC A  72     -25.075 -47.700  -7.320  6.00  0.00           C  
ATOM   2276  O4'  DC A  72     -25.701 -46.545  -6.940  5.00  0.00           O  
ATOM   2277  C3'  DC A  72     -23.753 -47.794  -6.490  8.00  0.00           C  
ATOM   2278  O3'  DC A  72     -22.599 -47.863  -7.400  8.00  0.00           O  
ATOM   2279  C2'  DC A  72     -23.658 -46.481  -5.760  4.00  0.00           C  
ATOM   2280  C1'  DC A  72     -24.674 -45.610  -6.530  2.00  0.00           C  
ATOM   2281  N1   DC A  72     -25.170 -44.460  -5.720  8.00  0.00           N  
ATOM   2282  C2   DC A  72     -25.119 -43.167  -6.270  9.00  0.00           C  
ATOM   2283  O2   DC A  72     -24.595 -42.976  -7.370  6.00  0.00           O  
ATOM   2284  N3   DC A  72     -25.518 -42.024  -5.730  5.00  0.00           N  
ATOM   2285  C4   DC A  72     -26.071 -42.135  -4.550  6.00  0.00           C  
ATOM   2286  N4   DC A  72     -26.327 -41.074  -3.910  1.00  0.00           N  
ATOM   2287  C5   DC A  72     -26.165 -43.389  -3.870  7.00  0.00           C  
ATOM   2288  C6   DC A  72     -25.652 -44.529  -4.410  1.00  0.00           C  
ATOM   2289  OP1  DC A  72     -27.959 -51.050  -8.070  8.00  0.00           O  
ATOM   2290  OP2  DC A  72     -28.730 -49.736  -5.990  1.00  0.00           O1-
ATOM   2291  H5   DC A  72     -26.579 -43.432  -2.850  8.00  0.00           H  
ATOM   2292  H6   DC A  72     -25.804 -45.515  -3.860  0.00  0.00           H  
ATOM   2293  H1'  DC A  72     -24.289 -45.311  -7.490  0.00  0.00           H  
ATOM   2294  H2'  DC A  72     -24.049 -46.738  -4.740  3.00  0.00           H  
ATOM   2295  H3'  DC A  72     -23.729 -48.579  -5.760  9.00  0.00           H  
ATOM   2296  H4'  DC A  72     -24.912 -47.674  -8.420  9.00  0.00           H  
ATOM   2297  H41  DC A  72     -26.229 -40.225  -4.380  2.00  0.00           H  
ATOM   2298  H5'  DC A  72     -25.591 -49.799  -7.310  1.00  0.00           H  
ATOM   2299  H42  DC A  72     -26.813 -41.055  -2.990  2.00  0.00           H  
ATOM   2300 H2''  DC A  72     -22.688 -46.065  -5.750  3.00  0.00           H  
ATOM   2301 H5''  DC A  72     -26.500 -48.749  -6.090  9.00  0.00           H  
ATOM   2302  P    DT A  73     -21.929 -49.235  -7.740  4.00  0.00           P  
ATOM   2303  C5'  DT A  73     -20.934 -50.010  -5.460  1.00  0.00           C  
ATOM   2304  O5'  DT A  73     -20.681 -49.352  -6.720  8.00  0.00           O  
ATOM   2305  C4'  DT A  73     -19.716 -50.344  -4.520  9.00  0.00           C  
ATOM   2306  O4'  DT A  73     -18.646 -50.997  -5.240  0.00  0.00           O  
ATOM   2307  C3'  DT A  73     -19.144 -49.277  -3.550  9.00  0.00           C  
ATOM   2308  O3'  DT A  73     -18.780 -49.925  -2.440  5.00  0.00           O  
ATOM   2309  C2'  DT A  73     -17.854 -48.942  -4.310  2.00  0.00           C  
ATOM   2310  C1'  DT A  73     -17.444 -50.343  -4.820  6.00  0.00           C  
ATOM   2311  N1   DT A  73     -16.532 -50.202  -6.030  1.00  0.00           N  
ATOM   2312  C2   DT A  73     -15.134 -50.376  -5.820  7.00  0.00           C  
ATOM   2313  O2   DT A  73     -14.629 -50.749  -4.750  8.00  0.00           O  
ATOM   2314  N3   DT A  73     -14.369 -50.158  -6.920  5.00  0.00           N  
ATOM   2315  C4   DT A  73     -14.751 -49.515  -8.050  0.00  0.00           C  
ATOM   2316  O4   DT A  73     -13.872 -49.197  -8.870  5.00  0.00           O  
ATOM   2317  C5   DT A  73     -16.221 -49.305  -8.230  1.00  0.00           C  
ATOM   2318  C6   DT A  73     -17.072 -49.634  -7.200  1.00  0.00           C  
ATOM   2319  C7   DT A  73     -16.851 -48.769  -9.510  2.00  0.00           C  
ATOM   2320  OP1  DT A  73     -21.265 -49.020  -9.080  7.00  0.00           O  
ATOM   2321  OP2  DT A  73     -23.012 -50.253  -7.570  6.00  0.00           O1-
ATOM   2322  H3   DT A  73     -13.402 -50.239  -6.720  2.00  0.00           H  
ATOM   2323  H6   DT A  73     -18.148 -49.345  -7.270  1.00  0.00           H  
ATOM   2324  H1'  DT A  73     -17.029 -50.974  -4.080  4.00  0.00           H  
ATOM   2325  H2'  DT A  73     -18.028 -48.292  -5.130  1.00  0.00           H  
ATOM   2326  H3'  DT A  73     -19.665 -48.400  -3.430  8.00  0.00           H  
ATOM   2327  H4'  DT A  73     -20.031 -51.240  -3.940  3.00  0.00           H  
ATOM   2328  H5'  DT A  73     -21.551 -50.969  -5.600  9.00  0.00           H  
ATOM   2329  H71  DT A  73     -17.907 -48.662  -9.460  5.00  0.00           H  
ATOM   2330  H72  DT A  73     -16.359 -47.778  -9.660  1.00  0.00           H  
ATOM   2331  H73  DT A  73     -16.539 -49.486 -10.190  6.00  0.00           H  
ATOM   2332 H2''  DT A  73     -17.104 -48.434  -3.690  8.00  0.00           H  
ATOM   2333 H5''  DT A  73     -21.616 -49.435  -4.910  7.00  0.00           H  
ATOM   2334  P    DA A  74     -19.774 -50.371  -1.270  9.00  0.00           P  
ATOM   2335  C5'  DA A  74     -20.067 -48.923   0.890  0.00  0.00           C  
ATOM   2336  O5'  DA A  74     -19.678 -49.019  -0.420  0.00  0.00           O  
ATOM   2337  C4'  DA A  74     -19.824 -47.521   1.450  9.00  0.00           C  
ATOM   2338  O4'  DA A  74     -18.400 -47.201   1.650  2.00  0.00           O  
ATOM   2339  C3'  DA A  74     -20.481 -46.309   0.760  0.00  0.00           C  
ATOM   2340  O3'  DA A  74     -21.900 -46.355   1.140  0.00  0.00           O  
ATOM   2341  C2'  DA A  74     -19.659 -45.142   1.370  0.00  0.00           C  
ATOM   2342  C1'  DA A  74     -18.290 -45.799   1.740  5.00  0.00           C  
ATOM   2343  N1   DA A  74     -14.307 -42.646   0.610  3.00  0.00           N  
ATOM   2344  C2   DA A  74     -15.075 -42.841   1.700  4.00  0.00           C  
ATOM   2345  N3   DA A  74     -15.989 -43.730   2.000  2.00  0.00           N  
ATOM   2346  C4   DA A  74     -16.224 -44.507   0.950  8.00  0.00           C  
ATOM   2347  C5   DA A  74     -15.647 -44.401  -0.250  3.00  0.00           C  
ATOM   2348  C6   DA A  74     -14.549 -43.491  -0.360  9.00  0.00           C  
ATOM   2349  N6   DA A  74     -13.878 -43.287  -1.460  8.00  0.00           N  
ATOM   2350  N7   DA A  74     -16.292 -45.189  -1.230  7.00  0.00           N  
ATOM   2351  C8   DA A  74     -17.298 -45.707  -0.550  6.00  0.00           C  
ATOM   2352  N9   DA A  74     -17.303 -45.393   0.760  4.00  0.00           N  
ATOM   2353  OP1  DA A  74     -19.055 -51.489  -0.640  3.00  0.00           O  
ATOM   2354  OP2  DA A  74     -21.145 -50.705  -1.680  6.00  0.00           O1-
ATOM   2355  H2   DA A  74     -14.895 -42.178   2.520  7.00  0.00           H  
ATOM   2356  H8   DA A  74     -17.996 -46.449  -0.920  3.00  0.00           H  
ATOM   2357  H1'  DA A  74     -17.970 -45.534   2.660  7.00  0.00           H  
ATOM   2358  H2'  DA A  74     -19.750 -44.379   0.710  2.00  0.00           H  
ATOM   2359  H3'  DA A  74     -20.454 -46.591  -0.330  9.00  0.00           H  
ATOM   2360  H4'  DA A  74     -20.317 -47.489   2.330  1.00  0.00           H  
ATOM   2361  H5'  DA A  74     -19.573 -49.740   1.470  3.00  0.00           H  
ATOM   2362  H61  DA A  74     -13.379 -42.476  -1.410  9.00  0.00           H  
ATOM   2363  H62  DA A  74     -14.278 -43.590  -2.370  1.00  0.00           H  
ATOM   2364 H2''  DA A  74     -20.050 -44.722   2.290  4.00  0.00           H  
ATOM   2365 H5''  DA A  74     -21.187 -49.018   0.880  0.00  0.00           H  
ATOM   2366  P    DA A  75     -22.905 -45.340   0.400  2.00  0.00           P  
ATOM   2367  C5'  DA A  75     -23.001 -43.832   2.540  1.00  0.00           C  
ATOM   2368  O5'  DA A  75     -22.707 -43.910   1.140  4.00  0.00           O  
ATOM   2369  C4'  DA A  75     -22.818 -42.473   3.220  8.00  0.00           C  
ATOM   2370  O4'  DA A  75     -21.410 -42.104   3.070  3.00  0.00           O  
ATOM   2371  C3'  DA A  75     -23.650 -41.374   2.630  6.00  0.00           C  
ATOM   2372  O3'  DA A  75     -24.303 -40.562   3.640  8.00  0.00           O  
ATOM   2373  C2'  DA A  75     -22.721 -40.503   1.700  6.00  0.00           C  
ATOM   2374  C1'  DA A  75     -21.365 -40.927   2.260  4.00  0.00           C  
ATOM   2375  N1   DA A  75     -16.499 -40.148   0.820  0.00  0.00           N  
ATOM   2376  C2   DA A  75     -17.196 -39.872   1.930  6.00  0.00           C  
ATOM   2377  N3   DA A  75     -18.474 -40.142   2.250  2.00  0.00           N  
ATOM   2378  C4   DA A  75     -19.050 -40.899   1.250  2.00  0.00           C  
ATOM   2379  C5   DA A  75     -18.490 -41.263   0.050  1.00  0.00           C  
ATOM   2380  C6   DA A  75     -17.146 -40.886  -0.100  1.00  0.00           C  
ATOM   2381  N6   DA A  75     -16.469 -41.158  -1.210  1.00  0.00           N  
ATOM   2382  N7   DA A  75     -19.443 -41.897  -0.750  4.00  0.00           N  
ATOM   2383  C8   DA A  75     -20.493 -41.834   0.000  9.00  0.00           C  
ATOM   2384  N9   DA A  75     -20.357 -41.177   1.190  1.00  0.00           N  
ATOM   2385  OP1  DA A  75     -24.196 -45.890   0.660  1.00  0.00           O  
ATOM   2386  OP2  DA A  75     -22.430 -45.180  -1.010  1.00  0.00           O1-
ATOM   2387  H2   DA A  75     -16.802 -39.233   2.740  1.00  0.00           H  
ATOM   2388  H8   DA A  75     -21.397 -42.343  -0.320  0.00  0.00           H  
ATOM   2389  H1'  DA A  75     -21.021 -40.096   2.890  8.00  0.00           H  
ATOM   2390  H2'  DA A  75     -22.795 -40.785   0.610  3.00  0.00           H  
ATOM   2391  H3'  DA A  75     -24.389 -41.780   2.010  1.00  0.00           H  
ATOM   2392  H4'  DA A  75     -23.037 -42.631   4.310  1.00  0.00           H  
ATOM   2393  H5'  DA A  75     -22.404 -44.582   3.030  9.00  0.00           H  
ATOM   2394  H61  DA A  75     -15.527 -40.839  -1.260  5.00  0.00           H  
ATOM   2395  H62  DA A  75     -16.730 -41.757  -1.940  2.00  0.00           H  
ATOM   2396 H2''  DA A  75     -22.881 -39.441   1.830  4.00  0.00           H  
ATOM   2397 H5''  DA A  75     -24.048 -44.110   2.610  3.00  0.00           H  
ATOM   2398  P    DC A  76     -25.820 -40.096   3.400  9.00  0.00           P  
ATOM   2399  C5'  DC A  76     -25.680 -37.854   1.890  6.00  0.00           C  
ATOM   2400  O5'  DC A  76     -25.780 -39.235   1.950  2.00  0.00           O  
ATOM   2401  C4'  DC A  76     -25.573 -37.223   0.450  7.00  0.00           C  
ATOM   2402  O4'  DC A  76     -24.377 -37.664  -0.190  7.00  0.00           O  
ATOM   2403  C3'  DC A  76     -26.712 -37.621  -0.450  7.00  0.00           C  
ATOM   2404  O3'  DC A  76     -27.851 -36.742  -0.450  8.00  0.00           O  
ATOM   2405  C2'  DC A  76     -26.061 -37.610  -1.830  6.00  0.00           C  
ATOM   2406  C1'  DC A  76     -24.572 -37.889  -1.540  9.00  0.00           C  
ATOM   2407  N1   DC A  76     -24.265 -39.325  -1.840  8.00  0.00           N  
ATOM   2408  C2   DC A  76     -23.447 -39.561  -2.990  9.00  0.00           C  
ATOM   2409  O2   DC A  76     -23.074 -38.660  -3.740  4.00  0.00           O  
ATOM   2410  N3   DC A  76     -23.094 -40.822  -3.310  4.00  0.00           N  
ATOM   2411  C4   DC A  76     -23.426 -41.767  -2.440  3.00  0.00           C  
ATOM   2412  N4   DC A  76     -22.848 -42.940  -2.630  3.00  0.00           N  
ATOM   2413  C5   DC A  76     -24.346 -41.575  -1.360  3.00  0.00           C  
ATOM   2414  C6   DC A  76     -24.775 -40.366  -1.020  6.00  0.00           C  
ATOM   2415  OP1  DC A  76     -26.091 -39.183   4.510  0.00  0.00           O  
ATOM   2416  OP2  DC A  76     -26.631 -41.306   3.200  4.00  0.00           O1-
ATOM   2417  H5   DC A  76     -24.571 -42.360  -0.670  2.00  0.00           H  
ATOM   2418  H6   DC A  76     -25.404 -40.189  -0.230  1.00  0.00           H  
ATOM   2419  H1'  DC A  76     -23.999 -37.239  -2.180  8.00  0.00           H  
ATOM   2420  H2'  DC A  76     -26.663 -38.268  -2.490  5.00  0.00           H  
ATOM   2421  H3'  DC A  76     -27.054 -38.637  -0.230  9.00  0.00           H  
ATOM   2422  H4'  DC A  76     -25.524 -36.187   0.560  5.00  0.00           H  
ATOM   2423  H41  DC A  76     -22.349 -43.084  -3.470  7.00  0.00           H  
ATOM   2424  H5'  DC A  76     -24.792 -37.495   2.450  2.00  0.00           H  
ATOM   2425  H42  DC A  76     -23.038 -43.672  -1.950  8.00  0.00           H  
ATOM   2426 H2''  DC A  76     -26.171 -36.646  -2.210  7.00  0.00           H  
ATOM   2427 H5''  DC A  76     -26.547 -37.358   2.370  0.00  0.00           H  
ATOM   2428  P    DC A  77     -29.366 -37.203  -0.440  3.00  0.00           P  
ATOM   2429  C5'  DC A  77     -29.813 -35.709  -2.610  1.00  0.00           C  
ATOM   2430  O5'  DC A  77     -29.786 -36.996  -1.980  3.00  0.00           O  
ATOM   2431  C4'  DC A  77     -29.896 -35.912  -4.120  5.00  0.00           C  
ATOM   2432  O4'  DC A  77     -28.857 -36.693  -4.690  1.00  0.00           O  
ATOM   2433  C3'  DC A  77     -31.275 -36.468  -4.470  7.00  0.00           C  
ATOM   2434  O3'  DC A  77     -32.366 -35.562  -4.460  9.00  0.00           O  
ATOM   2435  C2'  DC A  77     -30.936 -37.044  -5.850  1.00  0.00           C  
ATOM   2436  C1'  DC A  77     -29.462 -37.333  -5.800  1.00  0.00           C  
ATOM   2437  N1   DC A  77     -29.199 -38.813  -5.720  7.00  0.00           N  
ATOM   2438  C2   DC A  77     -28.680 -39.545  -6.800  7.00  0.00           C  
ATOM   2439  O2   DC A  77     -28.116 -39.003  -7.770  3.00  0.00           O  
ATOM   2440  N3   DC A  77     -28.681 -40.933  -6.770  1.00  0.00           N  
ATOM   2441  C4   DC A  77     -29.089 -41.509  -5.680  5.00  0.00           C  
ATOM   2442  N4   DC A  77     -28.872 -42.830  -5.690  1.00  0.00           N  
ATOM   2443  C5   DC A  77     -29.600 -40.846  -4.520  8.00  0.00           C  
ATOM   2444  C6   DC A  77     -29.622 -39.462  -4.580  7.00  0.00           C  
ATOM   2445  OP1  DC A  77     -30.096 -36.188   0.360  1.00  0.00           O  
ATOM   2446  OP2  DC A  77     -29.512 -38.597  -0.130  0.00  0.00           O1-
ATOM   2447  H5   DC A  77     -29.843 -41.436  -3.620  3.00  0.00           H  
ATOM   2448  H6   DC A  77     -29.922 -38.917  -3.760  1.00  0.00           H  
ATOM   2449  H1'  DC A  77     -28.920 -36.985  -6.760  0.00  0.00           H  
ATOM   2450  H2'  DC A  77     -31.599 -37.875  -6.170  4.00  0.00           H  
ATOM   2451  H3'  DC A  77     -31.483 -37.285  -3.760  8.00  0.00           H  
ATOM   2452  H4'  DC A  77     -29.857 -34.982  -4.660  9.00  0.00           H  
ATOM   2453  H41  DC A  77     -28.531 -43.172  -6.540  0.00  0.00           H  
ATOM   2454  H5'  DC A  77     -28.944 -35.187  -2.280  8.00  0.00           H  
ATOM   2455  H42  DC A  77     -29.098 -43.464  -4.960  1.00  0.00           H  
ATOM   2456 H2''  DC A  77     -31.055 -36.225  -6.630  0.00  0.00           H  
ATOM   2457 H5''  DC A  77     -30.574 -35.084  -2.170  1.00  0.00           H  
ATOM   2458  P    DC A  78     -33.915 -36.091  -4.750  7.00  0.00           P  
ATOM   2459  C5'  DC A  78     -34.003 -35.210  -7.320  0.00  0.00           C  
ATOM   2460  O5'  DC A  78     -34.229 -36.339  -6.350  5.00  0.00           O  
ATOM   2461  C4'  DC A  78     -34.167 -35.650  -8.770  8.00  0.00           C  
ATOM   2462  O4'  DC A  78     -33.469 -36.913  -8.990  3.00  0.00           O  
ATOM   2463  C3'  DC A  78     -35.660 -35.861  -9.100  7.00  0.00           C  
ATOM   2464  O3'  DC A  78     -36.382 -34.606  -9.360  2.00  0.00           O  
ATOM   2465  C2'  DC A  78     -35.464 -36.673 -10.360  1.00  0.00           C  
ATOM   2466  C1'  DC A  78     -34.180 -37.474 -10.050  9.00  0.00           C  
ATOM   2467  N1   DC A  78     -34.392 -38.903  -9.740  2.00  0.00           N  
ATOM   2468  C2   DC A  78     -33.944 -39.925 -10.650  3.00  0.00           C  
ATOM   2469  O2   DC A  78     -33.485 -39.727 -11.800  2.00  0.00           O  
ATOM   2470  N3   DC A  78     -33.986 -41.219 -10.300  9.00  0.00           N  
ATOM   2471  C4   DC A  78     -34.639 -41.538  -9.120  9.00  0.00           C  
ATOM   2472  N4   DC A  78     -34.713 -42.814  -8.900  3.00  0.00           N  
ATOM   2473  C5   DC A  78     -35.242 -40.578  -8.220  5.00  0.00           C  
ATOM   2474  C6   DC A  78     -34.996 -39.269  -8.480  0.00  0.00           C  
ATOM   2475  OP1  DC A  78     -34.807 -34.974  -4.260  9.00  0.00           O  
ATOM   2476  OP2  DC A  78     -34.024 -37.420  -4.130  1.00  0.00           O1-
ATOM   2477  H5   DC A  78     -35.754 -40.931  -7.290  0.00  0.00           H  
ATOM   2478  H6   DC A  78     -35.377 -38.506  -7.760  1.00  0.00           H  
ATOM   2479  H1'  DC A  78     -33.565 -37.467 -10.930  6.00  0.00           H  
ATOM   2480  H2'  DC A  78     -36.280 -37.351 -10.530  1.00  0.00           H  
ATOM   2481  H3'  DC A  78     -36.095 -36.493  -8.330  0.00  0.00           H  
ATOM   2482  H4'  DC A  78     -33.665 -34.888  -9.390  1.00  0.00           H  
ATOM   2483  H41  DC A  78     -34.990 -43.354  -9.650  7.00  0.00           H  
ATOM   2484  H5'  DC A  78     -33.009 -34.717  -7.210  2.00  0.00           H  
ATOM   2485  H42  DC A  78     -34.915 -43.050  -7.920  9.00  0.00           H  
ATOM   2486 H2''  DC A  78     -35.323 -36.033 -11.240  9.00  0.00           H  
ATOM   2487 H5''  DC A  78     -34.723 -34.374  -7.180  8.00  0.00           H  
ATOM   2488  P    DT A  79     -37.795 -34.482  -8.640  8.00  0.00           P  
ATOM   2489  C5'  DT A  79     -38.912 -33.711 -10.920  0.00  0.00           C  
ATOM   2490  O5'  DT A  79     -38.598 -33.444  -9.560  3.00  0.00           O  
ATOM   2491  C4'  DT A  79     -39.636 -32.517 -11.510  6.00  0.00           C  
ATOM   2492  O4'  DT A  79     -39.843 -32.837 -12.850  6.00  0.00           O  
ATOM   2493  C3'  DT A  79     -41.008 -32.146 -10.940  7.00  0.00           C  
ATOM   2494  O3'  DT A  79     -41.244 -30.762 -11.240  8.00  0.00           O  
ATOM   2495  C2'  DT A  79     -41.982 -33.051 -11.670  3.00  0.00           C  
ATOM   2496  C1'  DT A  79     -41.302 -32.957 -13.040  3.00  0.00           C  
ATOM   2497  N1   DT A  79     -41.766 -33.990 -14.030  4.00  0.00           N  
ATOM   2498  C2   DT A  79     -42.409 -33.499 -15.230  2.00  0.00           C  
ATOM   2499  O2   DT A  79     -42.361 -32.305 -15.540  0.00  0.00           O  
ATOM   2500  N3   DT A  79     -43.027 -34.487 -16.020  7.00  0.00           N  
ATOM   2501  C4   DT A  79     -43.191 -35.823 -15.730  3.00  0.00           C  
ATOM   2502  O4   DT A  79     -43.931 -36.450 -16.470  6.00  0.00           O  
ATOM   2503  C5   DT A  79     -42.383 -36.220 -14.530  8.00  0.00           C  
ATOM   2504  C6   DT A  79     -41.689 -35.307 -13.810  2.00  0.00           C  
ATOM   2505  C7   DT A  79     -42.416 -37.655 -14.080  3.00  0.00           C  
ATOM   2506  OP1  DT A  79     -38.397 -35.806  -8.670  2.00  0.00           O  
ATOM   2507  OP2  DT A  79     -37.626 -33.864  -7.350  5.00  0.00           O1-
ATOM   2508  H3   DT A  79     -43.607 -34.085 -16.710  2.00  0.00           H  
ATOM   2509  H6   DT A  79     -41.101 -35.663 -12.920  0.00  0.00           H  
ATOM   2510  H1'  DT A  79     -41.648 -31.967 -13.390  6.00  0.00           H  
ATOM   2511  H2'  DT A  79     -41.839 -34.077 -11.270  7.00  0.00           H  
ATOM   2512  H3'  DT A  79     -41.041 -32.264  -9.860  0.00  0.00           H  
ATOM   2513  H4'  DT A  79     -39.025 -31.641 -11.440  8.00  0.00           H  
ATOM   2514  H5'  DT A  79     -39.655 -34.465 -11.070  5.00  0.00           H  
ATOM   2515  H71  DT A  79     -42.025 -38.368 -14.830  7.00  0.00           H  
ATOM   2516  H72  DT A  79     -41.747 -37.883 -13.170  9.00  0.00           H  
ATOM   2517  H73  DT A  79     -43.414 -38.006 -13.760  4.00  0.00           H  
ATOM   2518 H2''  DT A  79     -42.998 -32.678 -11.670  9.00  0.00           H  
ATOM   2519 H5''  DT A  79     -38.068 -33.915 -11.500  6.00  0.00           H  
ATOM   2520  P    DA A  80     -42.481 -29.918 -10.640  4.00  0.00           P  
ATOM   2521  C5'  DA A  80     -43.647 -29.733 -12.910  4.00  0.00           C  
ATOM   2522  O5'  DA A  80     -43.666 -30.213 -11.550  7.00  0.00           O  
ATOM   2523  C4'  DA A  80     -44.759 -30.548 -13.640  9.00  0.00           C  
ATOM   2524  O4'  DA A  80     -44.531 -31.982 -13.550  6.00  0.00           O  
ATOM   2525  C3'  DA A  80     -46.192 -30.334 -13.190  2.00  0.00           C  
ATOM   2526  O3'  DA A  80     -46.898 -29.443 -14.030  9.00  0.00           O  
ATOM   2527  C2'  DA A  80     -46.803 -31.729 -13.400  8.00  0.00           C  
ATOM   2528  C1'  DA A  80     -45.701 -32.548 -14.080  7.00  0.00           C  
ATOM   2529  N1   DA A  80     -48.404 -36.736 -15.300  8.00  0.00           N  
ATOM   2530  C2   DA A  80     -48.409 -35.501 -15.810  6.00  0.00           C  
ATOM   2531  N3   DA A  80     -47.655 -34.519 -15.380  7.00  0.00           N  
ATOM   2532  C4   DA A  80     -46.868 -34.798 -14.300  3.00  0.00           C  
ATOM   2533  C5   DA A  80     -46.835 -35.991 -13.670  3.00  0.00           C  
ATOM   2534  C6   DA A  80     -47.648 -37.001 -14.220  6.00  0.00           C  
ATOM   2535  N6   DA A  80     -47.784 -38.249 -13.710  3.00  0.00           N  
ATOM   2536  N7   DA A  80     -45.886 -35.886 -12.650  3.00  0.00           N  
ATOM   2537  C8   DA A  80     -45.387 -34.688 -12.690  8.00  0.00           C  
ATOM   2538  N9   DA A  80     -45.949 -33.978 -13.730  6.00  0.00           N  
ATOM   2539  OP1  DA A  80     -42.182 -28.514 -10.690  5.00  0.00           O  
ATOM   2540  OP2  DA A  80     -42.840 -30.420  -9.300  7.00  0.00           O1-
ATOM   2541  H2   DA A  80     -49.058 -35.277 -16.610  0.00  0.00           H  
ATOM   2542  H8   DA A  80     -44.641 -34.272 -11.990  4.00  0.00           H  
ATOM   2543  H1'  DA A  80     -45.755 -32.494 -15.140  1.00  0.00           H  
ATOM   2544  H2'  DA A  80     -47.023 -32.089 -12.380  1.00  0.00           H  
ATOM   2545  H3'  DA A  80     -46.219 -30.045 -12.120  9.00  0.00           H  
ATOM   2546  H4'  DA A  80     -44.757 -30.313 -14.710  4.00  0.00           H  
ATOM   2547  H5'  DA A  80     -42.680 -30.003 -13.350  9.00  0.00           H  
ATOM   2548  H61  DA A  80     -48.443 -38.846 -14.160  9.00  0.00           H  
ATOM   2549  H62  DA A  80     -47.183 -38.540 -12.970  6.00  0.00           H  
ATOM   2550 H2''  DA A  80     -47.724 -31.666 -14.020  5.00  0.00           H  
ATOM   2551 H5''  DA A  80     -43.688 -28.600 -12.960  3.00  0.00           H  
ATOM   2552  P    DA A  81     -47.956 -28.386 -13.490  1.00  0.00           P  
ATOM   2553  C5'  DA A  81     -49.731 -29.492 -15.110  2.00  0.00           C  
ATOM   2554  O5'  DA A  81     -49.262 -29.253 -13.790  3.00  0.00           O  
ATOM   2555  C4'  DA A  81     -51.190 -29.839 -15.080  0.00  0.00           C  
ATOM   2556  O4'  DA A  81     -51.349 -31.281 -14.920  5.00  0.00           O  
ATOM   2557  C3'  DA A  81     -52.121 -29.162 -13.990  8.00  0.00           C  
ATOM   2558  O3'  DA A  81     -53.431 -29.036 -14.600  2.00  0.00           O  
ATOM   2559  C2'  DA A  81     -52.072 -30.181 -12.850  4.00  0.00           C  
ATOM   2560  C1'  DA A  81     -52.087 -31.509 -13.680  1.00  0.00           C  
ATOM   2561  N1   DA A  81     -51.674 -36.560 -12.950  0.00  0.00           N  
ATOM   2562  C2   DA A  81     -52.642 -35.832 -13.560  5.00  0.00           C  
ATOM   2563  N3   DA A  81     -52.625 -34.496 -13.700  4.00  0.00           N  
ATOM   2564  C4   DA A  81     -51.613 -33.902 -13.030  9.00  0.00           C  
ATOM   2565  C5   DA A  81     -50.571 -34.481 -12.330  4.00  0.00           C  
ATOM   2566  C6   DA A  81     -50.638 -35.900 -12.470  2.00  0.00           C  
ATOM   2567  N6   DA A  81     -49.771 -36.623 -11.890  8.00  0.00           N  
ATOM   2568  N7   DA A  81     -49.720 -33.535 -11.740  8.00  0.00           N  
ATOM   2569  C8   DA A  81     -50.229 -32.408 -12.200  9.00  0.00           C  
ATOM   2570  N9   DA A  81     -51.374 -32.562 -12.960  6.00  0.00           N  
ATOM   2571  OP1  DA A  81     -47.968 -27.176 -14.350  5.00  0.00           O  
ATOM   2572  OP2  DA A  81     -47.988 -28.300 -11.960  0.00  0.00           O1-
ATOM   2573  H2   DA A  81     -53.488 -36.373 -14.080  6.00  0.00           H  
ATOM   2574  H8   DA A  81     -49.756 -31.519 -12.080  4.00  0.00           H  
ATOM   2575  H1'  DA A  81     -53.141 -31.778 -13.860  4.00  0.00           H  
ATOM   2576  H2'  DA A  81     -51.131 -30.003 -12.310  4.00  0.00           H  
ATOM   2577  H3'  DA A  81     -51.711 -28.260 -13.790  7.00  0.00           H  
ATOM   2578  H4'  DA A  81     -51.553 -29.563 -16.120  6.00  0.00           H  
ATOM   2579  H5'  DA A  81     -49.133 -30.279 -15.500  4.00  0.00           H  
ATOM   2580  H61  DA A  81     -49.894 -37.601 -11.890  7.00  0.00           H  
ATOM   2581  H62  DA A  81     -49.174 -36.213 -11.240  2.00  0.00           H  
ATOM   2582 H2''  DA A  81     -52.863 -30.084 -12.120  0.00  0.00           H  
ATOM   2583 H5''  DA A  81     -49.642 -28.581 -15.680  2.00  0.00           H  
ATOM   2584  P    DC A  82     -54.745 -28.449 -13.850  2.00  0.00           P  
ATOM   2585  C5'  DC A  82     -56.183 -30.632 -13.740  1.00  0.00           C  
ATOM   2586  O5'  DC A  82     -55.398 -29.715 -13.000  1.00  0.00           O  
ATOM   2587  C4'  DC A  82     -56.562 -32.020 -13.100  9.00  0.00           C  
ATOM   2588  O4'  DC A  82     -55.382 -32.742 -12.660  5.00  0.00           O  
ATOM   2589  C3'  DC A  82     -57.459 -31.974 -11.820  5.00  0.00           C  
ATOM   2590  O3'  DC A  82     -58.509 -32.886 -11.900  5.00  0.00           O  
ATOM   2591  C2'  DC A  82     -56.460 -32.296 -10.710  0.00  0.00           C  
ATOM   2592  C1'  DC A  82     -55.602 -33.423 -11.420  9.00  0.00           C  
ATOM   2593  N1   DC A  82     -54.294 -33.782 -10.820  1.00  0.00           N  
ATOM   2594  C2   DC A  82     -54.028 -35.090 -10.450  9.00  0.00           C  
ATOM   2595  O2   DC A  82     -54.840 -35.970 -10.600  8.00  0.00           O  
ATOM   2596  N3   DC A  82     -52.834 -35.443  -9.900  3.00  0.00           N  
ATOM   2597  C4   DC A  82     -52.088 -34.454  -9.450  5.00  0.00           C  
ATOM   2598  N4   DC A  82     -51.015 -34.820  -8.750  6.00  0.00           N  
ATOM   2599  C5   DC A  82     -52.337 -33.058  -9.720  6.00  0.00           C  
ATOM   2600  C6   DC A  82     -53.452 -32.778 -10.450  7.00  0.00           C  
ATOM   2601  OP1  DC A  82     -55.709 -27.970 -14.850  4.00  0.00           O  
ATOM   2602  OP2  DC A  82     -54.309 -27.503 -12.850  9.00  0.00           O1-
ATOM   2603  H5   DC A  82     -51.699 -32.237  -9.380  6.00  0.00           H  
ATOM   2604  H6   DC A  82     -53.718 -31.709 -10.570  4.00  0.00           H  
ATOM   2605  H1'  DC A  82     -56.245 -34.247 -11.580  7.00  0.00           H  
ATOM   2606  H2'  DC A  82     -55.814 -31.367 -10.640  2.00  0.00           H  
ATOM   2607  H3'  DC A  82     -57.835 -30.976 -11.710  4.00  0.00           H  
ATOM   2608  H4'  DC A  82     -57.035 -32.541 -13.930  1.00  0.00           H  
ATOM   2609  H41  DC A  82     -50.929 -35.784  -8.570  8.00  0.00           H  
ATOM   2610  H5'  DC A  82     -55.775 -30.785 -14.760  9.00  0.00           H  
ATOM   2611  H42  DC A  82     -50.424 -34.091  -8.380  2.00  0.00           H  
ATOM   2612 H2''  DC A  82     -57.030 -32.534  -9.820  8.00  0.00           H  
ATOM   2613 H5''  DC A  82     -57.140 -30.230 -14.010  4.00  0.00           H  
ATOM   2614  P    DC A  83     -59.715 -32.748 -10.910  3.00  0.00           P  
ATOM   2615  C5'  DC A  83     -60.041 -35.194 -10.040  9.00  0.00           C  
ATOM   2616  O5'  DC A  83     -59.487 -33.885  -9.860  8.00  0.00           O  
ATOM   2617  C4'  DC A  83     -59.702 -36.150  -8.910  0.00  0.00           C  
ATOM   2618  O4'  DC A  83     -58.337 -36.299  -8.760  0.00  0.00           O  
ATOM   2619  C3'  DC A  83     -60.332 -35.739  -7.520  9.00  0.00           C  
ATOM   2620  O3'  DC A  83     -61.312 -36.671  -7.060  6.00  0.00           O  
ATOM   2621  C2'  DC A  83     -59.175 -35.666  -6.580  1.00  0.00           C  
ATOM   2622  C1'  DC A  83     -58.102 -36.498  -7.360  6.00  0.00           C  
ATOM   2623  N1   DC A  83     -56.689 -36.150  -7.020  3.00  0.00           N  
ATOM   2624  C2   DC A  83     -55.898 -37.022  -6.280  9.00  0.00           C  
ATOM   2625  O2   DC A  83     -56.465 -38.016  -5.780  6.00  0.00           O  
ATOM   2626  N3   DC A  83     -54.580 -36.771  -6.100  1.00  0.00           N  
ATOM   2627  C4   DC A  83     -54.072 -35.637  -6.490  4.00  0.00           C  
ATOM   2628  N4   DC A  83     -52.831 -35.494  -6.210  4.00  0.00           N  
ATOM   2629  C5   DC A  83     -54.836 -34.751  -7.260  2.00  0.00           C  
ATOM   2630  C6   DC A  83     -56.115 -35.005  -7.570  3.00  0.00           C  
ATOM   2631  OP1  DC A  83     -60.863 -33.071 -11.760  1.00  0.00           O  
ATOM   2632  OP2  DC A  83     -59.713 -31.471 -10.140  8.00  0.00           O1-
ATOM   2633  H5   DC A  83     -54.415 -33.825  -7.630  9.00  0.00           H  
ATOM   2634  H6   DC A  83     -56.718 -34.380  -8.090  3.00  0.00           H  
ATOM   2635  H1'  DC A  83     -58.255 -37.526  -7.150  3.00  0.00           H  
ATOM   2636  H2'  DC A  83     -58.923 -34.650  -6.410  2.00  0.00           H  
ATOM   2637  H3'  DC A  83     -60.648 -34.636  -7.540  3.00  0.00           H  
ATOM   2638  H4'  DC A  83     -60.235 -37.131  -9.130  9.00  0.00           H  
ATOM   2639  H41  DC A  83     -52.277 -36.260  -5.840  1.00  0.00           H  
ATOM   2640  H5'  DC A  83     -59.540 -35.661 -10.840  5.00  0.00           H  
ATOM   2641  H42  DC A  83     -52.344 -34.783  -6.750  4.00  0.00           H  
ATOM   2642 H2''  DC A  83     -59.350 -36.229  -5.630  9.00  0.00           H  
ATOM   2643 H5''  DC A  83     -61.141 -35.186 -10.230  8.00  0.00           H  
ATOM   2644  P    DC A  84     -62.130 -36.375  -5.720  3.00  0.00           P  
ATOM   2645  C5'  DC A  84     -61.203 -38.654  -4.680  8.00  0.00           C  
ATOM   2646  O5'  DC A  84     -61.296 -37.220  -4.640  9.00  0.00           O  
ATOM   2647  C4'  DC A  84     -60.244 -39.123  -3.630  6.00  0.00           C  
ATOM   2648  O4'  DC A  84     -58.859 -38.629  -3.770  2.00  0.00           O  
ATOM   2649  C3'  DC A  84     -60.785 -38.796  -2.230  5.00  0.00           C  
ATOM   2650  O3'  DC A  84     -61.138 -39.894  -1.410  7.00  0.00           O  
ATOM   2651  C2'  DC A  84     -59.611 -37.876  -1.670  2.00  0.00           C  
ATOM   2652  C1'  DC A  84     -58.357 -38.262  -2.440  7.00  0.00           C  
ATOM   2653  N1   DC A  84     -57.304 -37.118  -2.500  5.00  0.00           N  
ATOM   2654  C2   DC A  84     -55.995 -37.360  -2.050  1.00  0.00           C  
ATOM   2655  O2   DC A  84     -55.692 -38.406  -1.460  3.00  0.00           O  
ATOM   2656  N3   DC A  84     -54.982 -36.439  -2.200  9.00  0.00           N  
ATOM   2657  C4   DC A  84     -55.286 -35.248  -2.750  6.00  0.00           C  
ATOM   2658  N4   DC A  84     -54.294 -34.482  -2.970  8.00  0.00           N  
ATOM   2659  C5   DC A  84     -56.512 -35.045  -3.400  4.00  0.00           C  
ATOM   2660  C6   DC A  84     -57.460 -35.987  -3.240  0.00  0.00           C  
ATOM   2661  OP1  DC A  84     -63.486 -37.043  -5.790  8.00  0.00           O  
ATOM   2662  OP2  DC A  84     -61.959 -34.987  -5.290  5.00  0.00           O1-
ATOM   2663  H5   DC A  84     -56.697 -34.176  -3.980  4.00  0.00           H  
ATOM   2664  H6   DC A  84     -58.464 -35.761  -3.650  6.00  0.00           H  
ATOM   2665  H1'  DC A  84     -57.976 -39.204  -1.890  1.00  0.00           H  
ATOM   2666  H2'  DC A  84     -59.926 -36.867  -1.800  1.00  0.00           H  
ATOM   2667  H3'  DC A  84     -61.707 -38.149  -2.280  4.00  0.00           H  
ATOM   2668  H4'  DC A  84     -60.203 -40.222  -3.810  5.00  0.00           H  
ATOM   2669  H41  DC A  84     -53.332 -34.860  -2.800  3.00  0.00           H  
ATOM   2670  H5'  DC A  84     -60.695 -38.971  -5.600  2.00  0.00           H  
ATOM   2671  H42  DC A  84     -54.417 -33.720  -3.630  9.00  0.00           H  
ATOM   2672 H2''  DC A  84     -59.340 -38.162  -0.660  5.00  0.00           H  
ATOM   2673 H5''  DC A  84     -62.147 -39.169  -4.540  1.00  0.00           H  
ATOM   2674  P    DT A  85     -61.642 -39.838   0.130  1.00  0.00           P  
ATOM   2675  C5'  DT A  85     -59.850 -41.171   1.430  1.00  0.00           C  
ATOM   2676  O5'  DT A  85     -60.399 -39.873   1.100  8.00  0.00           O  
ATOM   2677  C4'  DT A  85     -58.505 -41.216   2.030  2.00  0.00           C  
ATOM   2678  O4'  DT A  85     -57.483 -40.509   1.290  9.00  0.00           O  
ATOM   2679  C3'  DT A  85     -58.351 -40.795   3.470  7.00  0.00           C  
ATOM   2680  O3'  DT A  85     -57.726 -41.814   4.290  6.00  0.00           O  
ATOM   2681  C2'  DT A  85     -57.308 -39.684   3.470  4.00  0.00           C  
ATOM   2682  C1'  DT A  85     -56.515 -40.021   2.180  6.00  0.00           C  
ATOM   2683  N1   DT A  85     -55.899 -38.820   1.610  1.00  0.00           N  
ATOM   2684  C2   DT A  85     -54.475 -38.704   1.570  6.00  0.00           C  
ATOM   2685  O2   DT A  85     -53.710 -39.672   1.850  8.00  0.00           O  
ATOM   2686  N3   DT A  85     -53.947 -37.468   1.280  0.00  0.00           N  
ATOM   2687  C4   DT A  85     -54.645 -36.369   0.800  7.00  0.00           C  
ATOM   2688  O4   DT A  85     -54.058 -35.395   0.400  4.00  0.00           O  
ATOM   2689  C5   DT A  85     -56.089 -36.518   0.990  2.00  0.00           C  
ATOM   2690  C6   DT A  85     -56.640 -37.770   1.270  4.00  0.00           C  
ATOM   2691  C7   DT A  85     -57.109 -35.394   0.610  7.00  0.00           C  
ATOM   2692  OP1  DT A  85     -62.398 -41.059   0.320  8.00  0.00           O  
ATOM   2693  OP2  DT A  85     -62.261 -38.549   0.410  8.00  0.00           O1-
ATOM   2694  H3   DT A  85     -52.941 -37.389   1.220  5.00  0.00           H  
ATOM   2695  H6   DT A  85     -57.724 -37.906   1.300  6.00  0.00           H  
ATOM   2696  H1'  DT A  85     -55.712 -40.754   2.390  0.00  0.00           H  
ATOM   2697  H2'  DT A  85     -57.823 -38.777   3.400  5.00  0.00           H  
ATOM   2698  H3'  DT A  85     -59.308 -40.386   3.870  8.00  0.00           H  
ATOM   2699  H4'  DT A  85     -58.187 -42.221   1.960  0.00  0.00           H  
ATOM   2700  H5'  DT A  85     -59.945 -41.886   0.530  2.00  0.00           H  
ATOM   2701  H71  DT A  85     -57.120 -34.763   1.490  3.00  0.00           H  
ATOM   2702  H72  DT A  85     -56.686 -34.756  -0.230  2.00  0.00           H  
ATOM   2703  H73  DT A  85     -58.102 -35.742   0.300  3.00  0.00           H  
ATOM   2704 H2''  DT A  85     -56.679 -39.729   4.360  1.00  0.00           H  
ATOM   2705 H5''  DT A  85     -60.418 -41.597   2.280  2.00  0.00           H  
ATOM   2706  P    DA A  86     -57.957 -41.919   5.850  8.00  0.00           P  
ATOM   2707  C5'  DA A  86     -55.639 -41.380   6.810  1.00  0.00           C  
ATOM   2708  O5'  DA A  86     -57.002 -41.023   6.660  6.00  0.00           O  
ATOM   2709  C4'  DA A  86     -54.700 -40.237   7.370  0.00  0.00           C  
ATOM   2710  O4'  DA A  86     -54.613 -39.221   6.330  2.00  0.00           O  
ATOM   2711  C3'  DA A  86     -55.304 -39.586   8.660  5.00  0.00           C  
ATOM   2712  O3'  DA A  86     -54.180 -39.153   9.450  2.00  0.00           O  
ATOM   2713  C2'  DA A  86     -55.980 -38.374   7.960  5.00  0.00           C  
ATOM   2714  C1'  DA A  86     -54.931 -38.007   6.930  2.00  0.00           C  
ATOM   2715  N1   DA A  86     -53.292 -34.422   3.760  0.00  0.00           N  
ATOM   2716  C2   DA A  86     -52.655 -35.344   4.420  9.00  0.00           C  
ATOM   2717  N3   DA A  86     -53.207 -36.326   5.140  2.00  0.00           N  
ATOM   2718  C4   DA A  86     -54.578 -36.223   5.100  6.00  0.00           C  
ATOM   2719  C5   DA A  86     -55.361 -35.298   4.430  2.00  0.00           C  
ATOM   2720  C6   DA A  86     -54.569 -34.411   3.670  8.00  0.00           C  
ATOM   2721  N6   DA A  86     -55.119 -33.452   2.940  2.00  0.00           N  
ATOM   2722  N7   DA A  86     -56.717 -35.590   4.750  7.00  0.00           N  
ATOM   2723  C8   DA A  86     -56.676 -36.588   5.650  5.00  0.00           C  
ATOM   2724  N9   DA A  86     -55.387 -36.909   5.980  7.00  0.00           N  
ATOM   2725  OP1  DA A  86     -57.638 -43.327   6.110  1.00  0.00           O  
ATOM   2726  OP2  DA A  86     -59.299 -41.433   6.150  3.00  0.00           O1-
ATOM   2727  H2   DA A  86     -51.648 -35.336   4.470  0.00  0.00           H  
ATOM   2728  H8   DA A  86     -57.553 -37.060   6.170  8.00  0.00           H  
ATOM   2729  H1'  DA A  86     -54.046 -37.582   7.480  3.00  0.00           H  
ATOM   2730  H2'  DA A  86     -56.962 -38.711   7.560  1.00  0.00           H  
ATOM   2731  H3'  DA A  86     -56.001 -40.307   9.130  5.00  0.00           H  
ATOM   2732  H4'  DA A  86     -53.692 -40.671   7.580  9.00  0.00           H  
ATOM   2733  H5'  DA A  86     -55.288 -41.707   5.850  9.00  0.00           H  
ATOM   2734  H61  DA A  86     -54.539 -32.745   2.510  7.00  0.00           H  
ATOM   2735  H62  DA A  86     -56.121 -33.360   2.820  1.00  0.00           H  
ATOM   2736 H2''  DA A  86     -56.075 -37.429   8.540  6.00  0.00           H  
ATOM   2737 H5''  DA A  86     -55.523 -42.207   7.490  9.00  0.00           H  
ATOM   2738  P    DA A  87     -54.138 -39.273  11.040  3.00  0.00           P  
ATOM   2739  C5'  DA A  87     -51.611 -39.015  11.620  1.00  0.00           C  
ATOM   2740  O5'  DA A  87     -52.846 -38.367  11.370  8.00  0.00           O  
ATOM   2741  C4'  DA A  87     -50.428 -38.010  11.620  2.00  0.00           C  
ATOM   2742  O4'  DA A  87     -50.294 -37.439  10.250  7.00  0.00           O  
ATOM   2743  C3'  DA A  87     -50.578 -36.771  12.530  0.00  0.00           C  
ATOM   2744  O3'  DA A  87     -49.224 -36.395  12.940  1.00  0.00           O  
ATOM   2745  C2'  DA A  87     -51.185 -35.658  11.770  6.00  0.00           C  
ATOM   2746  C1'  DA A  87     -50.721 -36.048  10.340  0.00  0.00           C  
ATOM   2747  N1   DA A  87     -52.012 -32.593   6.710  4.00  0.00           N  
ATOM   2748  C2   DA A  87     -50.810 -32.854   7.170  4.00  0.00           C  
ATOM   2749  N3   DA A  87     -50.532 -33.817   8.060  3.00  0.00           N  
ATOM   2750  C4   DA A  87     -51.647 -34.540   8.410  2.00  0.00           C  
ATOM   2751  C5   DA A  87     -52.893 -34.337   8.030  7.00  0.00           C  
ATOM   2752  C6   DA A  87     -53.052 -33.213   7.160  1.00  0.00           C  
ATOM   2753  N6   DA A  87     -54.193 -32.715   6.740  1.00  0.00           N  
ATOM   2754  N7   DA A  87     -53.805 -35.308   8.530  8.00  0.00           N  
ATOM   2755  C8   DA A  87     -52.996 -35.979   9.310  3.00  0.00           C  
ATOM   2756  N9   DA A  87     -51.701 -35.595   9.270  6.00  0.00           N  
ATOM   2757  OP1  DA A  87     -53.945 -40.717  11.440  9.00  0.00           O  
ATOM   2758  OP2  DA A  87     -55.266 -38.472  11.590  4.00  0.00           O1-
ATOM   2759  H2   DA A  87     -49.915 -32.248   6.790  4.00  0.00           H  
ATOM   2760  H8   DA A  87     -53.354 -36.774   9.920  4.00  0.00           H  
ATOM   2761  H1'  DA A  87     -49.743 -35.458  10.170  7.00  0.00           H  
ATOM   2762  H2'  DA A  87     -52.205 -35.785  11.940  0.00  0.00           H  
ATOM   2763  H3'  DA A  87     -51.211 -37.048  13.390  4.00  0.00           H  
ATOM   2764  H4'  DA A  87     -49.521 -38.607  12.000  5.00  0.00           H  
ATOM   2765  H5'  DA A  87     -51.430 -39.913  10.990  5.00  0.00           H  
ATOM   2766  H61  DA A  87     -54.229 -31.861   6.210  5.00  0.00           H  
ATOM   2767  H62  DA A  87     -55.075 -33.141   6.910  0.00  0.00           H  
ATOM   2768 H2''  DA A  87     -50.839 -34.743  12.240  5.00  0.00           H  
ATOM   2769 H5''  DA A  87     -51.506 -39.337  12.720  1.00  0.00           H  
ATOM   2770  P    DC A  88     -48.967 -35.299  14.040  5.00  0.00           P  
ATOM   2771  C5'  DC A  88     -47.495 -33.468  12.770  2.00  0.00           C  
ATOM   2772  O5'  DC A  88     -48.721 -33.908  13.330  2.00  0.00           O  
ATOM   2773  C4'  DC A  88     -47.465 -32.002  12.140  9.00  0.00           C  
ATOM   2774  O4'  DC A  88     -48.410 -31.921  11.070  4.00  0.00           O  
ATOM   2775  C3'  DC A  88     -47.664 -30.854  13.120  7.00  0.00           C  
ATOM   2776  O3'  DC A  88     -46.884 -29.695  12.700  2.00  0.00           O  
ATOM   2777  C2'  DC A  88     -49.077 -30.468  12.750  5.00  0.00           C  
ATOM   2778  C1'  DC A  88     -49.092 -30.631  11.230  7.00  0.00           C  
ATOM   2779  N1   DC A  88     -50.521 -30.733  10.710  8.00  0.00           N  
ATOM   2780  C2   DC A  88     -50.927 -29.871   9.660  6.00  0.00           C  
ATOM   2781  O2   DC A  88     -50.207 -28.921   9.240  3.00  0.00           O  
ATOM   2782  N3   DC A  88     -52.190 -29.894   9.180  9.00  0.00           N  
ATOM   2783  C4   DC A  88     -52.986 -30.870   9.600  9.00  0.00           C  
ATOM   2784  N4   DC A  88     -54.231 -30.894   9.190  8.00  0.00           N  
ATOM   2785  C5   DC A  88     -52.594 -31.807  10.630  2.00  0.00           C  
ATOM   2786  C6   DC A  88     -51.320 -31.742  11.120  3.00  0.00           C  
ATOM   2787  OP1  DC A  88     -47.778 -35.680  14.830  0.00  0.00           O  
ATOM   2788  OP2  DC A  88     -50.257 -35.102  14.720  7.00  0.00           O1-
ATOM   2789  H5   DC A  88     -53.144 -32.558  11.020  9.00  0.00           H  
ATOM   2790  H6   DC A  88     -50.896 -32.469  11.760  3.00  0.00           H  
ATOM   2791  H1'  DC A  88     -48.491 -29.831  10.820  4.00  0.00           H  
ATOM   2792  H2'  DC A  88     -49.769 -31.252  13.190  7.00  0.00           H  
ATOM   2793  H3'  DC A  88     -47.495 -31.124  14.210  1.00  0.00           H  
ATOM   2794  H4'  DC A  88     -46.489 -31.878  11.760  6.00  0.00           H  
ATOM   2795  H41  DC A  88     -54.578 -30.180   8.560  5.00  0.00           H  
ATOM   2796  H5'  DC A  88     -47.216 -34.258  12.090  0.00  0.00           H  
ATOM   2797  H42  DC A  88     -54.828 -31.586   9.570  9.00  0.00           H  
ATOM   2798 H2''  DC A  88     -49.407 -29.445  13.020  0.00  0.00           H  
ATOM   2799 H5''  DC A  88     -46.775 -33.583  13.590  6.00  0.00           H  
ATOM   2800  P    DC A  89     -46.600 -28.473  13.670  4.00  0.00           P  
ATOM   2801  C5'  DC A  89     -46.721 -27.066  11.400  8.00  0.00           C  
ATOM   2802  O5'  DC A  89     -47.010 -27.140  12.790  0.00  0.00           O  
ATOM   2803  C4'  DC A  89     -47.036 -25.723  10.760  0.00  0.00           C  
ATOM   2804  O4'  DC A  89     -48.277 -25.791  10.180  0.00  0.00           O  
ATOM   2805  C3'  DC A  89     -47.010 -24.582  11.800  6.00  0.00           C  
ATOM   2806  O3'  DC A  89     -46.408 -23.428  11.190  5.00  0.00           O  
ATOM   2807  C2'  DC A  89     -48.445 -24.497  12.090  0.00  0.00           C  
ATOM   2808  C1'  DC A  89     -49.182 -24.891  10.780  8.00  0.00           C  
ATOM   2809  N1   DC A  89     -50.512 -25.520  11.040  5.00  0.00           N  
ATOM   2810  C2   DC A  89     -51.641 -24.935  10.490  2.00  0.00           C  
ATOM   2811  O2   DC A  89     -51.656 -23.889   9.820  7.00  0.00           O  
ATOM   2812  N3   DC A  89     -52.884 -25.588  10.640  8.00  0.00           N  
ATOM   2813  C4   DC A  89     -52.867 -26.667  11.370  8.00  0.00           C  
ATOM   2814  N4   DC A  89     -53.966 -27.222  11.590  4.00  0.00           N  
ATOM   2815  C5   DC A  89     -51.707 -27.311  11.880  5.00  0.00           C  
ATOM   2816  C6   DC A  89     -50.553 -26.704  11.720  7.00  0.00           C  
ATOM   2817  OP1  DC A  89     -45.180 -28.394  13.960  7.00  0.00           O  
ATOM   2818  OP2  DC A  89     -47.473 -28.615  14.830  9.00  0.00           O1-
ATOM   2819  H5   DC A  89     -51.717 -28.305  12.440  6.00  0.00           H  
ATOM   2820  H6   DC A  89     -49.604 -27.136  12.120  7.00  0.00           H  
ATOM   2821  H1'  DC A  89     -49.286 -23.909  10.300  7.00  0.00           H  
ATOM   2822  H2'  DC A  89     -48.689 -25.205  12.860  5.00  0.00           H  
ATOM   2823  H3'  DC A  89     -46.392 -24.815  12.720  0.00  0.00           H  
ATOM   2824  H4'  DC A  89     -46.312 -25.479  10.000  6.00  0.00           H  
ATOM   2825  H41  DC A  89     -54.788 -26.941  11.020  1.00  0.00           H  
ATOM   2826  H5'  DC A  89     -47.285 -27.848  10.880  4.00  0.00           H  
ATOM   2827  H42  DC A  89     -53.945 -28.055  12.190  6.00  0.00           H  
ATOM   2828 H2''  DC A  89     -48.772 -23.546  12.330  5.00  0.00           H  
ATOM   2829 H5''  DC A  89     -45.687 -27.294  11.250  8.00  0.00           H  
ATOM   2830  P   DC3 A  90     -45.968 -22.210  12.100  2.00  0.00           P  
ATOM   2831  C5' DC3 A  90     -47.846 -20.570  11.190  9.00  0.00           C  
ATOM   2832  O5' DC3 A  90     -47.239 -21.324  12.290  4.00  0.00           O  
ATOM   2833  C4' DC3 A  90     -49.342 -20.309  11.500  7.00  0.00           C  
ATOM   2834  O4' DC3 A  90     -50.052 -21.524  11.810  3.00  0.00           O  
ATOM   2835  C3' DC3 A  90     -49.493 -19.439  12.790  0.00  0.00           C  
ATOM   2836  O3' DC3 A  90     -50.180 -18.277  12.500  6.00  0.00           O  
ATOM   2837  C2' DC3 A  90     -50.279 -20.381  13.730  8.00  0.00           C  
ATOM   2838  C1' DC3 A  90     -51.029 -21.184  12.670  4.00  0.00           C  
ATOM   2839  N1  DC3 A  90     -51.775 -22.330  13.210  8.00  0.00           N  
ATOM   2840  C2  DC3 A  90     -53.105 -22.494  13.040  6.00  0.00           C  
ATOM   2841  O2  DC3 A  90     -53.841 -21.706  12.530  2.00  0.00           O  
ATOM   2842  N3  DC3 A  90     -53.716 -23.614  13.470  9.00  0.00           N  
ATOM   2843  C4  DC3 A  90     -52.948 -24.548  14.120  0.00  0.00           C  
ATOM   2844  N4  DC3 A  90     -53.512 -25.677  14.250  2.00  0.00           N  
ATOM   2845  C5  DC3 A  90     -51.613 -24.382  14.430  0.00  0.00           C  
ATOM   2846  C6  DC3 A  90     -51.047 -23.283  13.870  1.00  0.00           C  
ATOM   2847  OP1 DC3 A  90     -44.981 -21.458  11.260  3.00  0.00           O  
ATOM   2848  OP2 DC3 A  90     -45.494 -22.736  13.390  6.00  0.00           O  
ATOM   2849 HO3' DC3 A  90     -51.196 -18.477  12.420  8.00  0.00           H  
ATOM   2850  H5  DC3 A  90     -51.005 -25.150  14.960  1.00  0.00           H  
ATOM   2851  H6  DC3 A  90     -49.997 -23.059  13.980  5.00  0.00           H  
ATOM   2852  H1' DC3 A  90     -51.708 -20.497  12.220  0.00  0.00           H  
ATOM   2853  H2' DC3 A  90     -49.639 -21.078  14.320  4.00  0.00           H  
ATOM   2854  H3' DC3 A  90     -48.532 -19.186  13.260  4.00  0.00           H  
ATOM   2855  H4' DC3 A  90     -49.797 -19.813  10.650  4.00  0.00           H  
ATOM   2856  H41 DC3 A  90     -54.448 -25.805  13.900  4.00  0.00           H  
ATOM   2857  H5' DC3 A  90     -47.842 -21.103  10.270  4.00  0.00           H  
ATOM   2858  H42 DC3 A  90     -52.974 -26.455  14.700  7.00  0.00           H  
ATOM   2859 H2'' DC3 A  90     -50.828 -19.880  14.510  2.00  0.00           H  
ATOM   2860 H5'' DC3 A  90     -47.345 -19.625  11.130  4.00  0.00           H  
ATOM   2861  C   CNT A 208     -17.680 -88.476 -38.080  1.00  0.00           C  
ATOM   2862  C   CNT A 208     -18.964 -87.903 -38.350  2.00  0.00           C  
ATOM   2863  C   CNT A 208     -19.057 -86.511 -38.020  6.00  0.00           C  
ATOM   2864  C   CNT A 208     -20.313 -85.864 -38.020  9.00  0.00           C  
ATOM   2865  C   CNT A 208     -20.156 -88.427 -38.880  6.00  0.00           C  
ATOM   2866  C   CNT A 208     -21.386 -87.972 -38.420  1.00  0.00           C  
ATOM   2867  C   CNT A 208     -21.445 -86.609 -38.020  8.00  0.00           C  
ATOM   2868  C   CNT A 208     -22.393 -86.231 -37.030  7.00  0.00           C  
ATOM   2869  C   CNT A 208     -22.420 -88.778 -37.890  8.00  0.00           C  
ATOM   2870  C   CNT A 208     -23.139 -88.511 -36.710  1.00  0.00           C  
ATOM   2871  C   CNT A 208     -22.969 -87.214 -36.210  5.00  0.00           C  
ATOM   2872  C   CNT A 208     -23.597 -86.886 -34.990  7.00  0.00           C  
ATOM   2873  C   CNT A 208     -23.773 -89.400 -35.790  9.00  0.00           C  
ATOM   2874  C   CNT A 208     -23.844 -89.232 -34.390  5.00  0.00           C  
ATOM   2875  C   CNT A 208     -23.874 -87.901 -34.010  1.00  0.00           C  
ATOM   2876  C   CNT A 208     -23.877 -87.486 -32.650  2.00  0.00           C  
ATOM   2877  C   CNT A 208     -23.671 -90.110 -33.320  6.00  0.00           C  
ATOM   2878  C   CNT A 208     -23.002 -89.709 -32.150  2.00  0.00           C  
ATOM   2879  C   CNT A 208     -23.147 -88.350 -31.710  7.00  0.00           C  
ATOM   2880  C   CNT A 208     -22.099 -87.798 -30.980  4.00  0.00           C  
ATOM   2881  C   CNT A 208     -21.964 -90.382 -31.540  3.00  0.00           C  
ATOM   2882  C   CNT A 208     -20.739 -89.777 -31.330  1.00  0.00           C  
ATOM   2883  C   CNT A 208     -20.835 -88.448 -30.880  7.00  0.00           C  
ATOM   2884  C   CNT A 208     -19.735 -87.687 -30.620  6.00  0.00           C  
ATOM   2885  C   CNT A 208     -19.436 -90.327 -31.290  2.00  0.00           C  
ATOM   2886  C   CNT A 208     -18.267 -89.540 -31.440  4.00  0.00           C  
ATOM   2887  C   CNT A 208     -18.473 -88.142 -31.060  8.00  0.00           C  
ATOM   2888  C   CNT A 208     -17.403 -87.265 -31.440  8.00  0.00           C  
ATOM   2889  C   CNT A 208     -16.982 -89.852 -31.940  1.00  0.00           C  
ATOM   2890  C   CNT A 208     -16.192 -88.956 -32.650  1.00  0.00           C  
ATOM   2891  C   CNT A 208     -16.446 -87.640 -32.380  9.00  0.00           C  
ATOM   2892  C   CNT A 208     -15.924 -86.626 -33.220  3.00  0.00           C  
ATOM   2893  C   CNT A 208     -15.431 -89.186 -33.780  6.00  0.00           C  
ATOM   2894  C   CNT A 208     -15.643 -88.363 -34.910  8.00  0.00           C  
ATOM   2895  C   CNT A 208     -15.786 -86.994 -34.580  2.00  0.00           C  
ATOM   2896  C   CNT A 208     -16.277 -86.120 -35.580  6.00  0.00           C  
ATOM   2897  C   CNT A 208     -15.876 -88.685 -36.270  8.00  0.00           C  
ATOM   2898  C   CNT A 208     -16.776 -87.992 -37.120  8.00  0.00           C  
ATOM   2899  C   CNT A 208     -16.986 -86.646 -36.740  0.00  0.00           C  
ATOM   2900  C   CNT A 208     -17.941 -85.839 -37.430  0.00  0.00           C  
ATOM   2901  C   CNT A 208     -18.049 -84.475 -37.070  9.00  0.00           C  
ATOM   2902  C   CNT A 208     -19.216 -83.730 -37.410  3.00  0.00           C  
ATOM   2903  C   CNT A 208     -19.327 -82.347 -37.110  9.00  0.00           C  
ATOM   2904  C   CNT A 208     -20.576 -81.796 -36.860  4.00  0.00           C  
ATOM   2905  C   CNT A 208     -20.374 -84.516 -37.680  0.00  0.00           C  
ATOM   2906  C   CNT A 208     -21.605 -83.978 -37.200  0.00  0.00           C  
ATOM   2907  C   CNT A 208     -21.636 -82.666 -36.700  9.00  0.00           C  
ATOM   2908  C   CNT A 208     -22.667 -82.209 -35.880  1.00  0.00           C  
ATOM   2909  C   CNT A 208     -22.586 -84.865 -36.730  1.00  0.00           C  
ATOM   2910  C   CNT A 208     -23.358 -84.522 -35.570  8.00  0.00           C  
ATOM   2911  C   CNT A 208     -23.410 -83.206 -35.170  0.00  0.00           C  
ATOM   2912  C   CNT A 208     -24.069 -82.821 -34.040  0.00  0.00           C  
ATOM   2913  C   CNT A 208     -23.783 -85.538 -34.710  1.00  0.00           C  
ATOM   2914  C   CNT A 208     -24.116 -85.166 -33.400  4.00  0.00           C  
ATOM   2915  C   CNT A 208     -24.166 -83.818 -33.030  9.00  0.00           C  
ATOM   2916  C   CNT A 208     -23.946 -83.407 -31.680  5.00  0.00           C  
ATOM   2917  C   CNT A 208     -23.855 -86.123 -32.340  9.00  0.00           C  
ATOM   2918  C   CNT A 208     -23.177 -85.603 -31.210  6.00  0.00           C  
ATOM   2919  C   CNT A 208     -23.276 -84.257 -30.870  2.00  0.00           C  
ATOM   2920  C   CNT A 208     -22.411 -83.796 -29.870  1.00  0.00           C  
ATOM   2921  C   CNT A 208     -22.165 -86.415 -30.670  3.00  0.00           C  
ATOM   2922  C   CNT A 208     -21.028 -85.768 -30.130  6.00  0.00           C  
ATOM   2923  C   CNT A 208     -21.161 -84.443 -29.740  7.00  0.00           C  
ATOM   2924  C   CNT A 208     -19.998 -83.610 -29.660  3.00  0.00           C  
ATOM   2925  C   CNT A 208     -19.807 -86.296 -30.290  4.00  0.00           C  
ATOM   2926  C   CNT A 208     -18.664 -85.507 -30.360  6.00  0.00           C  
ATOM   2927  C   CNT A 208     -18.768 -84.156 -30.010  8.00  0.00           C  
ATOM   2928  C   CNT A 208     -17.814 -83.212 -30.430  7.00  0.00           C  
ATOM   2929  C   CNT A 208     -17.535 -85.938 -31.110  6.00  0.00           C  
ATOM   2930  C   CNT A 208     -16.731 -84.957 -31.720  9.00  0.00           C  
ATOM   2931  C   CNT A 208     -16.889 -83.619 -31.370  8.00  0.00           C  
ATOM   2932  C   CNT A 208     -16.373 -82.628 -32.240  2.00  0.00           C  
ATOM   2933  C   CNT A 208     -16.108 -85.273 -32.940  2.00  0.00           C  
ATOM   2934  C   CNT A 208     -16.224 -84.318 -33.980  5.00  0.00           C  
ATOM   2935  C   CNT A 208     -16.342 -82.998 -33.620  4.00  0.00           C  
ATOM   2936  C   CNT A 208     -16.735 -82.118 -34.600  9.00  0.00           C  
ATOM   2937  C   CNT A 208     -16.473 -84.787 -35.290  5.00  0.00           C  
ATOM   2938  C   CNT A 208     -17.297 -83.920 -36.050  3.00  0.00           C  
ATOM   2939  C   CNT A 208     -17.370 -82.574 -35.740  4.00  0.00           C  
ATOM   2940  C   CNT A 208     -18.224 -81.740 -36.490  5.00  0.00           C  
ATOM   2941  C   CNT A 208     -18.303 -80.358 -36.170  0.00  0.00           C  
ATOM   2942  C   CNT A 208     -19.536 -79.666 -36.370  0.00  0.00           C  
ATOM   2943  C   CNT A 208     -19.586 -78.333 -36.010  5.00  0.00           C  
ATOM   2944  C   CNT A 208     -20.852 -77.755 -35.870  8.00  0.00           C  
ATOM   2945  C   CNT A 208     -20.684 -80.422 -36.620  7.00  0.00           C  
ATOM   2946  C   CNT A 208     -21.907 -79.964 -36.010  4.00  0.00           C  
ATOM   2947  C   CNT A 208     -22.005 -78.589 -35.660  7.00  0.00           C  
ATOM   2948  C   CNT A 208     -23.097 -78.173 -34.850  7.00  0.00           C  
ATOM   2949  C   CNT A 208     -22.896 -80.879 -35.510  1.00  0.00           C  
ATOM   2950  C   CNT A 208     -23.622 -80.430 -34.440  8.00  0.00           C  
ATOM   2951  C   CNT A 208     -23.883 -79.125 -34.120  9.00  0.00           C  
ATOM   2952  C   CNT A 208     -24.440 -78.739 -32.920  1.00  0.00           C  
ATOM   2953  C   CNT A 208     -24.153 -81.424 -33.630  0.00  0.00           C  
ATOM   2954  C   CNT A 208     -24.478 -81.137 -32.260  6.00  0.00           C  
ATOM   2955  C   CNT A 208     -24.608 -79.751 -31.910  7.00  0.00           C  
ATOM   2956  C   CNT A 208     -24.351 -79.366 -30.610  0.00  0.00           C  
ATOM   2957  C   CNT A 208     -24.126 -82.067 -31.270  2.00  0.00           C  
ATOM   2958  C   CNT A 208     -23.667 -81.662 -30.030  5.00  0.00           C  
ATOM   2959  C   CNT A 208     -23.684 -80.292 -29.740  3.00  0.00           C  
ATOM   2960  C   CNT A 208     -22.781 -79.699 -28.860  8.00  0.00           C  
ATOM   2961  C   CNT A 208     -22.584 -82.440 -29.440  9.00  0.00           C  
ATOM   2962  C   CNT A 208     -21.440 -81.734 -28.980  0.00  0.00           C  
ATOM   2963  C   CNT A 208     -21.506 -80.377 -28.610  8.00  0.00           C  
ATOM   2964  C   CNT A 208     -20.337 -79.596 -28.410  4.00  0.00           C  
ATOM   2965  C   CNT A 208     -20.207 -82.275 -29.250  0.00  0.00           C  
ATOM   2966  C   CNT A 208     -19.177 -81.435 -29.420  6.00  0.00           C  
ATOM   2967  C   CNT A 208     -19.172 -80.087 -29.010  4.00  0.00           C  
ATOM   2968  C   CNT A 208     -18.115 -79.198 -29.320  6.00  0.00           C  
ATOM   2969  C   CNT A 208     -18.000 -81.893 -30.080  1.00  0.00           C  
ATOM   2970  C   CNT A 208     -17.224 -80.950 -30.780  1.00  0.00           C  
ATOM   2971  C   CNT A 208     -17.227 -79.598 -30.390  4.00  0.00           C  
ATOM   2972  C   CNT A 208     -16.766 -78.631 -31.270  0.00  0.00           C  
ATOM   2973  C   CNT A 208     -16.593 -81.285 -32.010  8.00  0.00           C  
ATOM   2974  C   CNT A 208     -16.447 -80.277 -32.980  4.00  0.00           C  
ATOM   2975  C   CNT A 208     -16.574 -78.941 -32.640  7.00  0.00           C  
ATOM   2976  C   CNT A 208     -16.977 -78.014 -33.570  9.00  0.00           C  
ATOM   2977  C   CNT A 208     -16.740 -80.736 -34.290  9.00  0.00           C  
ATOM   2978  C   CNT A 208     -17.384 -79.858 -35.200  8.00  0.00           C  
ATOM   2979  C   CNT A 208     -17.496 -78.496 -34.800  8.00  0.00           C  
ATOM   2980  C   CNT A 208     -18.484 -77.705 -35.430  9.00  0.00           C  
ATOM   2981  C   CNT A 208     -18.604 -76.330 -35.100  4.00  0.00           C  
ATOM   2982  C   CNT A 208     -19.843 -75.679 -35.320  1.00  0.00           C  
ATOM   2983  C   CNT A 208     -19.991 -74.346 -34.930  2.00  0.00           C  
ATOM   2984  C   CNT A 208     -21.289 -73.715 -34.910  1.00  0.00           C  
ATOM   2985  C   CNT A 208     -20.991 -76.425 -35.530  5.00  0.00           C  
ATOM   2986  C   CNT A 208     -22.184 -75.931 -34.960  4.00  0.00           C  
ATOM   2987  C   CNT A 208     -22.393 -74.559 -34.700  1.00  0.00           C  
ATOM   2988  C   CNT A 208     -23.460 -74.140 -33.950  6.00  0.00           C  
ATOM   2989  C   CNT A 208     -23.213 -76.824 -34.520  8.00  0.00           C  
ATOM   2990  C   CNT A 208     -24.038 -76.457 -33.450  3.00  0.00           C  
ATOM   2991  C   CNT A 208     -24.160 -75.101 -33.160  7.00  0.00           C  
ATOM   2992  C   CNT A 208     -24.758 -74.694 -32.000  5.00  0.00           C  
ATOM   2993  C   CNT A 208     -24.487 -77.413 -32.530  0.00  0.00           C  
ATOM   2994  C   CNT A 208     -24.782 -77.038 -31.240  1.00  0.00           C  
ATOM   2995  C   CNT A 208     -24.799 -75.696 -30.930  7.00  0.00           C  
ATOM   2996  C   CNT A 208     -24.596 -75.295 -29.600  3.00  0.00           C  
ATOM   2997  C   CNT A 208     -24.459 -77.986 -30.240  5.00  0.00           C  
ATOM   2998  C   CNT A 208     -23.946 -77.569 -29.060  9.00  0.00           C  
ATOM   2999  C   CNT A 208     -24.075 -76.222 -28.660  3.00  0.00           C  
ATOM   3000  C   CNT A 208     -23.160 -75.714 -27.710  4.00  0.00           C  
ATOM   3001  C   CNT A 208     -22.908 -78.392 -28.500  3.00  0.00           C  
ATOM   3002  C   CNT A 208     -21.750 -77.725 -27.970  6.00  0.00           C  
ATOM   3003  C   CNT A 208     -21.907 -76.385 -27.590  2.00  0.00           C  
ATOM   3004  C   CNT A 208     -20.713 -75.607 -27.340  7.00  0.00           C  
ATOM   3005  C   CNT A 208     -20.442 -78.236 -28.060  5.00  0.00           C  
ATOM   3006  C   CNT A 208     -19.329 -77.424 -28.190  2.00  0.00           C  
ATOM   3007  C   CNT A 208     -19.426 -76.094 -27.820  9.00  0.00           C  
ATOM   3008  C   CNT A 208     -18.422 -75.174 -28.240  3.00  0.00           C  
ATOM   3009  C   CNT A 208     -18.268 -77.866 -28.960  6.00  0.00           C  
ATOM   3010  C   CNT A 208     -17.585 -76.908 -29.690  4.00  0.00           C  
ATOM   3011  C   CNT A 208     -17.718 -75.562 -29.380  5.00  0.00           C  
ATOM   3012  C   CNT A 208     -17.146 -74.567 -30.240  0.00  0.00           C  
ATOM   3013  C   CNT A 208     -17.015 -77.292 -30.940  1.00  0.00           C  
ATOM   3014  C   CNT A 208     -16.899 -76.284 -31.960  6.00  0.00           C  
ATOM   3015  C   CNT A 208     -16.965 -74.914 -31.620  7.00  0.00           C  
ATOM   3016  C   CNT A 208     -17.278 -73.981 -32.560  4.00  0.00           C  
ATOM   3017  C   CNT A 208     -17.069 -76.645 -33.280  5.00  0.00           C  
ATOM   3018  C   CNT A 208     -17.732 -75.779 -34.180  0.00  0.00           C  
ATOM   3019  C   CNT A 208     -17.838 -74.428 -33.800  8.00  0.00           C  
ATOM   3020  C   CNT A 208     -18.882 -73.655 -34.370  6.00  0.00           C  
ATOM   3021  C   CNT A 208     -19.101 -72.301 -33.940  5.00  0.00           C  
ATOM   3022  C   CNT A 208     -20.207 -71.601 -34.320  8.00  0.00           C  
ATOM   3023  C   CNT A 208     -20.344 -70.263 -33.940  7.00  0.00           C  
ATOM   3024  C   CNT A 208     -21.635 -69.704 -33.790  7.00  0.00           C  
ATOM   3025  C   CNT A 208     -21.384 -72.400 -34.580  1.00  0.00           C  
ATOM   3026  C   CNT A 208     -22.628 -71.889 -34.040  5.00  0.00           C  
ATOM   3027  C   CNT A 208     -22.718 -70.562 -33.650  8.00  0.00           C  
ATOM   3028  C   CNT A 208     -23.823 -70.107 -32.900  9.00  0.00           C  
ATOM   3029  C   CNT A 208     -23.617 -72.785 -33.590  0.00  0.00           C  
ATOM   3030  C   CNT A 208     -24.413 -72.395 -32.500  8.00  0.00           C  
ATOM   3031  C   CNT A 208     -24.669 -71.042 -32.200  8.00  0.00           C  
ATOM   3032  C   CNT A 208     -25.150 -70.670 -30.930  0.00  0.00           C  
ATOM   3033  C   CNT A 208     -24.800 -73.365 -31.580  8.00  0.00           C  
ATOM   3034  C   CNT A 208     -24.977 -73.042 -30.210  1.00  0.00           C  
ATOM   3035  C   CNT A 208     -25.116 -71.663 -29.890  2.00  0.00           C  
ATOM   3036  C   CNT A 208     -25.024 -71.294 -28.530  5.00  0.00           C  
ATOM   3037  C   CNT A 208     -24.713 -73.984 -29.220  8.00  0.00           C  
ATOM   3038  C   CNT A 208     -24.146 -73.518 -28.060  4.00  0.00           C  
ATOM   3039  C   CNT A 208     -24.277 -72.173 -27.730  1.00  0.00           C  
ATOM   3040  C   CNT A 208     -23.346 -71.636 -26.820  5.00  0.00           C  
ATOM   3041  C   CNT A 208     -23.133 -74.332 -27.490  7.00  0.00           C  
ATOM   3042  C   CNT A 208     -22.065 -73.659 -26.870  0.00  0.00           C  
ATOM   3043  C   CNT A 208     -22.165 -72.353 -26.520  8.00  0.00           C  
ATOM   3044  C   CNT A 208     -20.953 -71.631 -26.170  7.00  0.00           C  
ATOM   3045  C   CNT A 208     -20.841 -74.281 -26.980  8.00  0.00           C  
ATOM   3046  C   CNT A 208     -19.674 -73.418 -27.080  5.00  0.00           C  
ATOM   3047  C   CNT A 208     -19.746 -72.090 -26.700  3.00  0.00           C  
ATOM   3048  C   CNT A 208     -18.754 -71.182 -27.130  1.00  0.00           C  
ATOM   3049  C   CNT A 208     -18.598 -73.814 -27.860  3.00  0.00           C  
ATOM   3050  C   CNT A 208     -17.807 -72.877 -28.510  8.00  0.00           C  
ATOM   3051  C   CNT A 208     -17.912 -71.559 -28.220  0.00  0.00           C  
ATOM   3052  C   CNT A 208     -17.411 -70.549 -29.150  7.00  0.00           C  
ATOM   3053  C   CNT A 208     -17.290 -73.238 -29.780  2.00  0.00           C  
ATOM   3054  C   CNT A 208     -17.280 -72.280 -30.830  9.00  0.00           C  
ATOM   3055  C   CNT A 208     -17.406 -70.923 -30.520  6.00  0.00           C  
ATOM   3056  C   CNT A 208     -17.646 -69.919 -31.500  8.00  0.00           C  
ATOM   3057  C   CNT A 208     -17.621 -72.669 -32.120  5.00  0.00           C  
ATOM   3058  C   CNT A 208     -18.198 -71.783 -32.990  3.00  0.00           C  
ATOM   3059  C   CNT A 208     -18.291 -70.407 -32.700  6.00  0.00           C  
ATOM   3060  C   CNT A 208     -19.307 -69.598 -33.280  4.00  0.00           C  
ATOM   3061  C   CNT A 208     -19.390 -68.296 -32.770  6.00  0.00           C  
ATOM   3062  C   CNT A 208     -20.485 -67.574 -33.100  0.00  0.00           C  
ATOM   3063  C   CNT A 208     -20.537 -66.231 -32.690  7.00  0.00           C  
ATOM   3064  C   CNT A 208     -21.782 -65.660 -32.590  4.00  0.00           C  
ATOM   3065  C   CNT A 208     -21.654 -68.352 -33.380  2.00  0.00           C  
ATOM   3066  C   CNT A 208     -22.849 -67.853 -32.940  6.00  0.00           C  
ATOM   3067  C   CNT A 208     -22.900 -66.506 -32.480  2.00  0.00           C  
ATOM   3068  C   CNT A 208     -24.011 -66.028 -31.720  3.00  0.00           C  
ATOM   3069  C   CNT A 208     -23.899 -68.739 -32.470  7.00  0.00           C  
ATOM   3070  C   CNT A 208     -24.665 -68.341 -31.410  1.00  0.00           C  
ATOM   3071  C   CNT A 208     -24.787 -66.980 -31.040  7.00  0.00           C  
ATOM   3072  C   CNT A 208     -25.443 -66.633 -29.810  6.00  0.00           C  
ATOM   3073  C   CNT A 208     -25.177 -69.292 -30.500  6.00  0.00           C  
ATOM   3074  C   CNT A 208     -25.486 -68.973 -29.130  7.00  0.00           C  
ATOM   3075  C   CNT A 208     -25.563 -67.647 -28.820  9.00  0.00           C  
ATOM   3076  C   CNT A 208     -25.330 -67.250 -27.500  7.00  0.00           C  
ATOM   3077  C   CNT A 208     -25.082 -69.907 -28.110  5.00  0.00           C  
ATOM   3078  C   CNT A 208     -24.445 -69.449 -27.030  4.00  0.00           C  
ATOM   3079  C   CNT A 208     -24.544 -68.092 -26.740  4.00  0.00           C  
ATOM   3080  C   CNT A 208     -23.588 -67.561 -25.820  3.00  0.00           C  
ATOM   3081  C   CNT A 208     -23.437 -70.298 -26.440  3.00  0.00           C  
ATOM   3082  C   CNT A 208     -22.333 -69.638 -25.880  5.00  0.00           C  
ATOM   3083  C   CNT A 208     -22.436 -68.303 -25.510  1.00  0.00           C  
ATOM   3084  C   CNT A 208     -21.291 -67.565 -25.240  3.00  0.00           C  
ATOM   3085  C   CNT A 208     -21.107 -70.274 -25.860  6.00  0.00           C  
ATOM   3086  C   CNT A 208     -19.952 -69.423 -26.040  9.00  0.00           C  
ATOM   3087  C   CNT A 208     -19.995 -68.097 -25.530  8.00  0.00           C  
ATOM   3088  C   CNT A 208     -18.949 -67.216 -25.980  0.00  0.00           C  
ATOM   3089  C   CNT A 208     -18.821 -69.855 -26.710  8.00  0.00           C  
ATOM   3090  C   CNT A 208     -18.060 -68.934 -27.460  0.00  0.00           C  
ATOM   3091  C   CNT A 208     -18.134 -67.562 -27.060  5.00  0.00           C  
ATOM   3092  C   CNT A 208     -17.754 -66.563 -27.990  7.00  0.00           C  
ATOM   3093  C   CNT A 208     -17.547 -69.220 -28.780  9.00  0.00           C  
ATOM   3094  C   CNT A 208     -17.528 -68.218 -29.750  8.00  0.00           C  
ATOM   3095  C   CNT A 208     -17.526 -66.899 -29.320  4.00  0.00           C  
ATOM   3096  C   CNT A 208     -17.820 -65.942 -30.280  5.00  0.00           C  
ATOM   3097  C   CNT A 208     -17.666 -68.616 -31.080  8.00  0.00           C  
ATOM   3098  C   CNT A 208     -18.455 -67.750 -31.850  5.00  0.00           C  
ATOM   3099  C   CNT A 208     -18.469 -66.393 -31.500  3.00  0.00           C  
ATOM   3100  C   CNT A 208     -19.466 -65.610 -32.060  9.00  0.00           C  
ATOM   3101  C   CNT A 208     -19.585 -64.222 -31.750  6.00  0.00           C  
ATOM   3102  C   CNT A 208     -20.756 -63.526 -32.070  3.00  0.00           C  
ATOM   3103  C   CNT A 208     -20.836 -62.151 -31.790  2.00  0.00           C  
ATOM   3104  C   CNT A 208     -22.140 -61.567 -31.560  5.00  0.00           C  
ATOM   3105  C   CNT A 208     -21.876 -64.290 -32.300  8.00  0.00           C  
ATOM   3106  C   CNT A 208     -23.148 -63.803 -31.840  7.00  0.00           C  
ATOM   3107  C   CNT A 208     -23.245 -62.431 -31.420  5.00  0.00           C  
ATOM   3108  C   CNT A 208     -24.316 -62.023 -30.680  7.00  0.00           C  
ATOM   3109  C   CNT A 208     -24.146 -64.672 -31.420  7.00  0.00           C  
ATOM   3110  C   CNT A 208     -25.034 -64.327 -30.400  9.00  0.00           C  
ATOM   3111  C   CNT A 208     -25.116 -62.996 -30.010  5.00  0.00           C  
ATOM   3112  C   CNT A 208     -25.660 -62.601 -28.770  6.00  0.00           C  
ATOM   3113  C   CNT A 208     -25.551 -65.277 -29.530  7.00  0.00           C  
ATOM   3114  C   CNT A 208     -25.710 -64.914 -28.180  4.00  0.00           C  
ATOM   3115  C   CNT A 208     -25.827 -63.576 -27.830  6.00  0.00           C  
ATOM   3116  C   CNT A 208     -25.644 -63.247 -26.450  9.00  0.00           C  
ATOM   3117  C   CNT A 208     -25.452 -65.872 -27.160  0.00  0.00           C  
ATOM   3118  C   CNT A 208     -24.751 -65.434 -25.960  8.00  0.00           C  
ATOM   3119  C   CNT A 208     -24.766 -64.035 -25.690  1.00  0.00           C  
ATOM   3120  C   CNT A 208     -23.835 -63.433 -24.880  5.00  0.00           C  
ATOM   3121  C   CNT A 208     -23.706 -66.188 -25.400  8.00  0.00           C  
ATOM   3122  C   CNT A 208     -22.561 -65.497 -24.950  4.00  0.00           C  
ATOM   3123  C   CNT A 208     -22.618 -64.109 -24.650  1.00  0.00           C  
ATOM   3124  C   CNT A 208     -21.465 -63.469 -24.210  9.00  0.00           C  
ATOM   3125  C   CNT A 208     -21.341 -66.181 -24.880  1.00  0.00           C  
ATOM   3126  C   CNT A 208     -20.169 -65.372 -24.990  9.00  0.00           C  
ATOM   3127  C   CNT A 208     -20.232 -64.017 -24.670  4.00  0.00           C  
ATOM   3128  C   CNT A 208     -19.160 -63.141 -25.000  3.00  0.00           C  
ATOM   3129  C   CNT A 208     -19.053 -65.836 -25.640  2.00  0.00           C  
ATOM   3130  C   CNT A 208     -18.272 -64.875 -26.350  8.00  0.00           C  
ATOM   3131  C   CNT A 208     -18.330 -63.487 -26.020  0.00  0.00           C  
ATOM   3132  C   CNT A 208     -17.879 -62.519 -26.930  6.00  0.00           C  
ATOM   3133  C   CNT A 208     -17.773 -65.237 -27.630  3.00  0.00           C  
ATOM   3134  C   CNT A 208     -17.725 -64.213 -28.590  7.00  0.00           C  
ATOM   3135  C   CNT A 208     -17.728 -62.861 -28.260  8.00  0.00           C  
ATOM   3136  C   CNT A 208     -18.188 -61.909 -29.200  3.00  0.00           C  
ATOM   3137  C   CNT A 208     -17.998 -64.617 -29.940  6.00  0.00           C  
ATOM   3138  C   CNT A 208     -18.650 -63.669 -30.770  1.00  0.00           C  
ATOM   3139  C   CNT A 208     -18.785 -62.342 -30.430  8.00  0.00           C  
ATOM   3140  C   CNT A 208     -19.768 -61.546 -31.040  3.00  0.00           C  
ATOM   3141  C   CNT A 208     -19.836 -60.186 -30.680  6.00  0.00           C  
ATOM   3142  C   CNT A 208     -21.068 -59.473 -30.950  6.00  0.00           C  
ATOM   3143  C   CNT A 208     -21.133 -58.122 -30.570  9.00  0.00           C  
ATOM   3144  C   CNT A 208     -22.412 -57.574 -30.430  1.00  0.00           C  
ATOM   3145  C   CNT A 208     -22.206 -60.206 -31.340  1.00  0.00           C  
ATOM   3146  C   CNT A 208     -23.457 -59.738 -30.820  7.00  0.00           C  
ATOM   3147  C   CNT A 208     -23.519 -58.354 -30.440  3.00  0.00           C  
ATOM   3148  C   CNT A 208     -24.639 -57.937 -29.700  8.00  0.00           C  
ATOM   3149  C   CNT A 208     -24.444 -60.671 -30.430  0.00  0.00           C  
ATOM   3150  C   CNT A 208     -25.356 -60.263 -29.410  7.00  0.00           C  
ATOM   3151  C   CNT A 208     -25.358 -58.941 -29.000  7.00  0.00           C  
ATOM   3152  C   CNT A 208     -25.939 -58.601 -27.730  6.00  0.00           C  
ATOM   3153  C   CNT A 208     -25.704 -61.254 -28.420  5.00  0.00           C  
ATOM   3154  C   CNT A 208     -26.053 -60.931 -27.120  6.00  0.00           C  
ATOM   3155  C   CNT A 208     -26.076 -59.560 -26.760  6.00  0.00           C  
ATOM   3156  C   CNT A 208     -25.898 -59.193 -25.400  9.00  0.00           C  
ATOM   3157  C   CNT A 208     -25.816 -61.853 -26.070  2.00  0.00           C  
ATOM   3158  C   CNT A 208     -25.047 -61.407 -24.950  1.00  0.00           C  
ATOM   3159  C   CNT A 208     -25.158 -60.046 -24.600  1.00  0.00           C  
ATOM   3160  C   CNT A 208     -24.181 -59.483 -23.780  8.00  0.00           C  
ATOM   3161  C   CNT A 208     -23.949 -62.146 -24.480  6.00  0.00           C  
ATOM   3162  C   CNT A 208     -22.849 -61.464 -23.920  8.00  0.00           C  
ATOM   3163  C   CNT A 208     -22.969 -60.145 -23.550  5.00  0.00           C  
ATOM   3164  C   CNT A 208     -21.774 -59.399 -23.260  7.00  0.00           C  
ATOM   3165  C   CNT A 208     -21.580 -62.140 -23.920  9.00  0.00           C  
ATOM   3166  C   CNT A 208     -20.443 -61.359 -23.980  4.00  0.00           C  
ATOM   3167  C   CNT A 208     -20.567 -59.983 -23.570  5.00  0.00           C  
ATOM   3168  C   CNT A 208     -19.558 -59.082 -24.050  2.00  0.00           C  
ATOM   3169  C   CNT A 208     -19.332 -61.776 -24.650  8.00  0.00           C  
ATOM   3170  C   CNT A 208     -18.478 -60.822 -25.280  1.00  0.00           C  
ATOM   3171  C   CNT A 208     -18.688 -59.454 -25.040  1.00  0.00           C  
ATOM   3172  C   CNT A 208     -18.189 -58.479 -25.910  3.00  0.00           C  
ATOM   3173  C   CNT A 208     -17.889 -61.164 -26.540  9.00  0.00           C  
ATOM   3174  C   CNT A 208     -17.974 -60.177 -27.560  8.00  0.00           C  
ATOM   3175  C   CNT A 208     -18.052 -58.784 -27.270  1.00  0.00           C  
ATOM   3176  C   CNT A 208     -18.435 -57.833 -28.230  7.00  0.00           C  
ATOM   3177  C   CNT A 208     -18.296 -60.561 -28.850  8.00  0.00           C  
ATOM   3178  C   CNT A 208     -18.982 -59.682 -29.670  7.00  0.00           C  
ATOM   3179  C   CNT A 208     -19.044 -58.302 -29.400  4.00  0.00           C  
ATOM   3180  C   CNT A 208     -19.987 -57.487 -30.140  8.00  0.00           C  
ATOM   3181  C   CNT A 208     -20.153 -56.195 -29.660  1.00  0.00           C  
ATOM   3182  C   CNT A 208     -21.359 -55.507 -29.820  9.00  0.00           C  
ATOM   3183  C   CNT A 208     -21.503 -54.165 -29.540  7.00  0.00           C  
ATOM   3184  C   CNT A 208     -22.759 -53.592 -29.330  3.00  0.00           C  
ATOM   3185  C   CNT A 208     -22.523 -56.181 -30.180  9.00  0.00           C  
ATOM   3186  C   CNT A 208     -23.731 -55.727 -29.690  7.00  0.00           C  
ATOM   3187  C   CNT A 208     -23.892 -54.408 -29.370  0.00  0.00           C  
ATOM   3188  C   CNT A 208     -25.014 -53.901 -28.670  6.00  0.00           C  
ATOM   3189  C   CNT A 208     -24.752 -56.583 -29.350  2.00  0.00           C  
ATOM   3190  C   CNT A 208     -25.733 -56.225 -28.380  7.00  0.00           C  
ATOM   3191  C   CNT A 208     -25.772 -54.845 -28.000  7.00  0.00           C  
ATOM   3192  C   CNT A 208     -26.331 -54.547 -26.720  8.00  0.00           C  
ATOM   3193  C   CNT A 208     -26.086 -57.222 -27.390  9.00  0.00           C  
ATOM   3194  C   CNT A 208     -26.173 -56.849 -26.040  9.00  0.00           C  
ATOM   3195  C   CNT A 208     -26.427 -55.513 -25.710  7.00  0.00           C  
ATOM   3196  C   CNT A 208     -25.981 -55.108 -24.420  4.00  0.00           C  
ATOM   3197  C   CNT A 208     -25.881 -57.815 -25.060  7.00  0.00           C  
ATOM   3198  C   CNT A 208     -25.281 -57.343 -23.910  0.00  0.00           C  
ATOM   3199  C   CNT A 208     -25.272 -56.009 -23.600  8.00  0.00           C  
ATOM   3200  C   CNT A 208     -24.477 -55.436 -22.660  9.00  0.00           C  
ATOM   3201  C   CNT A 208     -24.281 -58.132 -23.320  0.00  0.00           C  
ATOM   3202  C   CNT A 208     -23.147 -57.529 -22.720  8.00  0.00           C  
ATOM   3203  C   CNT A 208     -23.230 -56.151 -22.420  1.00  0.00           C  
ATOM   3204  C   CNT A 208     -22.103 -55.423 -22.040  0.00  0.00           C  
ATOM   3205  C   CNT A 208     -21.868 -58.049 -22.960  1.00  0.00           C  
ATOM   3206  C   CNT A 208     -20.776 -57.204 -23.010  8.00  0.00           C  
ATOM   3207  C   CNT A 208     -20.843 -55.904 -22.450  8.00  0.00           C  
ATOM   3208  C   CNT A 208     -19.852 -55.003 -22.870  3.00  0.00           C  
ATOM   3209  C   CNT A 208     -19.657 -57.693 -23.730  4.00  0.00           C  
ATOM   3210  C   CNT A 208     -18.857 -56.729 -24.340  8.00  0.00           C  
ATOM   3211  C   CNT A 208     -18.987 -55.357 -23.960  2.00  0.00           C  
ATOM   3212  C   CNT A 208     -18.636 -54.369 -24.860  9.00  0.00           C  
ATOM   3213  C   CNT A 208     -18.287 -57.069 -25.570  0.00  0.00           C  
ATOM   3214  C   CNT A 208     -18.218 -56.077 -26.580  6.00  0.00           C  
ATOM   3215  C   CNT A 208     -18.487 -54.712 -26.210  8.00  0.00           C  
ATOM   3216  C   CNT A 208     -18.854 -53.800 -27.210  4.00  0.00           C  
ATOM   3217  C   CNT A 208     -18.511 -56.443 -27.940  0.00  0.00           C  
ATOM   3218  C   CNT A 208     -19.269 -55.607 -28.770  5.00  0.00           C  
ATOM   3219  C   CNT A 208     -19.379 -54.281 -28.360  9.00  0.00           C  
ATOM   3220  C   CNT A 208     -20.393 -53.509 -29.010  0.00  0.00           C  
ATOM   3221  C   CNT A 208     -20.461 -52.124 -28.710  5.00  0.00           C  
ATOM   3222  C   CNT A 208     -21.652 -51.443 -29.060  3.00  0.00           C  
ATOM   3223  C   CNT A 208     -21.781 -50.095 -28.640  9.00  0.00           C  
ATOM   3224  C   CNT A 208     -23.069 -49.493 -28.430  6.00  0.00           C  
ATOM   3225  C   CNT A 208     -22.799 -52.202 -29.110  5.00  0.00           C  
ATOM   3226  C   CNT A 208     -24.001 -51.662 -28.600  4.00  0.00           C  
ATOM   3227  C   CNT A 208     -24.131 -50.336 -28.270  5.00  0.00           C  
ATOM   3228  C   CNT A 208     -25.268 -49.908 -27.530  3.00  0.00           C  
ATOM   3229  C   CNT A 208     -25.032 -52.565 -28.220  1.00  0.00           C  
ATOM   3230  C   CNT A 208     -25.911 -52.201 -27.160  5.00  0.00           C  
ATOM   3231  C   CNT A 208     -26.041 -50.844 -26.860  8.00  0.00           C  
ATOM   3232  C   CNT A 208     -26.587 -50.432 -25.650  3.00  0.00           C  
ATOM   3233  C   CNT A 208     -26.479 -53.243 -26.340  3.00  0.00           C  
ATOM   3234  C   CNT A 208     -26.603 -52.828 -24.990  8.00  0.00           C  
ATOM   3235  C   CNT A 208     -26.666 -51.439 -24.640  3.00  0.00           C  
ATOM   3236  C   CNT A 208     -26.308 -51.033 -23.290  3.00  0.00           C  
ATOM   3237  C   CNT A 208     -26.103 -53.771 -24.060  7.00  0.00           C  
ATOM   3238  C   CNT A 208     -25.556 -53.292 -22.860  5.00  0.00           C  
ATOM   3239  C   CNT A 208     -25.636 -51.939 -22.470  7.00  0.00           C  
ATOM   3240  C   CNT A 208     -24.730 -51.404 -21.530  1.00  0.00           C  
ATOM   3241  C   CNT A 208     -24.568 -54.112 -22.240  1.00  0.00           C  
ATOM   3242  C   CNT A 208     -23.446 -53.443 -21.560  1.00  0.00           C  
ATOM   3243  C   CNT A 208     -23.544 -52.088 -21.360  2.00  0.00           C  
ATOM   3244  C   CNT A 208     -22.368 -51.314 -21.110  7.00  0.00           C  
ATOM   3245  C   CNT A 208     -22.194 -54.055 -21.710  7.00  0.00           C  
ATOM   3246  C   CNT A 208     -21.057 -53.244 -21.700  3.00  0.00           C  
ATOM   3247  C   CNT A 208     -21.112 -51.913 -21.300  0.00  0.00           C  
ATOM   3248  C   CNT A 208     -20.029 -51.050 -21.660  7.00  0.00           C  
ATOM   3249  C   CNT A 208     -19.961 -53.639 -22.550  1.00  0.00           C  
ATOM   3250  C   CNT A 208     -19.161 -52.736 -23.230  1.00  0.00           C  
ATOM   3251  C   CNT A 208     -19.255 -51.379 -22.860  9.00  0.00           C  
ATOM   3252  C   CNT A 208     -19.005 -50.384 -23.820  2.00  0.00           C  
ATOM   3253  C   CNT A 208     -18.683 -53.039 -24.490  2.00  0.00           C  
ATOM   3254  C   CNT A 208     -18.743 -52.083 -25.510  2.00  0.00           C  
ATOM   3255  C   CNT A 208     -18.939 -50.741 -25.140  4.00  0.00           C  
ATOM   3256  C   CNT A 208     -19.175 -49.801 -26.190  2.00  0.00           C  
ATOM   3257  C   CNT A 208     -18.958 -52.475 -26.850  0.00  0.00           C  
ATOM   3258  C   CNT A 208     -19.591 -51.630 -27.750  4.00  0.00           C  
ATOM   3259  C   CNT A 208     -19.719 -50.238 -27.370  5.00  0.00           C  
ATOM   3260  C   CNT A 208     -20.717 -49.465 -27.970  9.00  0.00           C  
ATOM   3261  C   CNT A 208     -20.831 -48.105 -27.590  7.00  0.00           C  
ATOM   3262  C   CNT A 208     -22.031 -47.411 -27.860  1.00  0.00           C  
ATOM   3263  C   CNT A 208     -22.066 -45.970 -27.580  2.00  0.00           C  
ATOM   3264  C   CNT A 208     -23.339 -45.373 -27.480  7.00  0.00           C  
ATOM   3265  C   CNT A 208     -23.217 -48.138 -28.100  4.00  0.00           C  
ATOM   3266  C   CNT A 208     -24.397 -47.640 -27.670  2.00  0.00           C  
ATOM   3267  C   CNT A 208     -24.433 -46.291 -27.290  9.00  0.00           C  
ATOM   3268  C   CNT A 208     -25.483 -45.823 -26.450  1.00  0.00           C  
ATOM   3269  C   CNT A 208     -25.401 -48.537 -27.220  5.00  0.00           C  
ATOM   3270  C   CNT A 208     -26.247 -48.135 -26.200  3.00  0.00           C  
ATOM   3271  C   CNT A 208     -26.315 -46.782 -25.800  9.00  0.00           C  
ATOM   3272  C   CNT A 208     -26.891 -46.447 -24.540  4.00  0.00           C  
ATOM   3273  C   CNT A 208     -26.677 -49.096 -25.270  5.00  0.00           C  
ATOM   3274  C   CNT A 208     -26.656 -48.745 -23.870  9.00  0.00           C  
ATOM   3275  C   CNT A 208     -26.915 -47.404 -23.500  5.00  0.00           C  
ATOM   3276  C   CNT A 208     -26.615 -47.082 -22.170  3.00  0.00           C  
ATOM   3277  C   CNT A 208     -26.347 -49.679 -22.920  6.00  0.00           C  
ATOM   3278  C   CNT A 208     -25.831 -49.303 -21.600  7.00  0.00           C  
ATOM   3279  C   CNT A 208     -25.951 -47.944 -21.290  2.00  0.00           C  
ATOM   3280  C   CNT A 208     -25.063 -47.432 -20.350  6.00  0.00           C  
ATOM   3281  C   CNT A 208     -24.822 -50.127 -21.030  0.00  0.00           C  
ATOM   3282  C   CNT A 208     -23.728 -49.438 -20.480  2.00  0.00           C  
ATOM   3283  C   CNT A 208     -23.825 -48.088 -20.160  6.00  0.00           C  
ATOM   3284  C   CNT A 208     -22.658 -47.417 -19.870  2.00  0.00           C  
ATOM   3285  C   CNT A 208     -22.482 -49.997 -20.610  3.00  0.00           C  
ATOM   3286  C   CNT A 208     -21.323 -49.254 -20.640  3.00  0.00           C  
ATOM   3287  C   CNT A 208     -21.388 -47.900 -20.250  5.00  0.00           C  
ATOM   3288  C   CNT A 208     -20.414 -46.990 -20.690  4.00  0.00           C  
ATOM   3289  C   CNT A 208     -20.237 -49.674 -21.390  0.00  0.00           C  
ATOM   3290  C   CNT A 208     -19.487 -48.715 -22.110  8.00  0.00           C  
ATOM   3291  C   CNT A 208     -19.608 -47.330 -21.770  0.00  0.00           C  
ATOM   3292  C   CNT A 208     -19.105 -46.395 -22.670  5.00  0.00           C  
ATOM   3293  C   CNT A 208     -19.156 -49.013 -23.490  3.00  0.00           C  
ATOM   3294  C   CNT A 208     -19.055 -48.049 -24.470  8.00  0.00           C  
ATOM   3295  C   CNT A 208     -19.091 -46.734 -24.060  4.00  0.00           C  
ATOM   3296  C   CNT A 208     -19.463 -45.814 -25.060  0.00  0.00           C  
ATOM   3297  C   CNT A 208     -19.169 -48.458 -25.850  5.00  0.00           C  
ATOM   3298  C   CNT A 208     -19.945 -47.580 -26.610  9.00  0.00           C  
ATOM   3299  C   CNT A 208     -20.049 -46.219 -26.220  0.00  0.00           C  
ATOM   3300  C   CNT A 208     -20.972 -45.351 -26.830  8.00  0.00           C  
ATOM   3301  C   CNT A 208     -21.021 -44.015 -26.500  6.00  0.00           C  
ATOM   3302  C   CNT A 208     -22.216 -43.337 -26.730  9.00  0.00           C  
ATOM   3303  C   CNT A 208     -22.347 -41.941 -26.360  9.00  0.00           C  
ATOM   3304  C   CNT A 208     -23.583 -41.337 -26.200  6.00  0.00           C  
ATOM   3305  C   CNT A 208     -23.423 -44.064 -27.030  2.00  0.00           C  
ATOM   3306  C   CNT A 208     -24.590 -43.519 -26.420  0.00  0.00           C  
ATOM   3307  C   CNT A 208     -24.732 -42.150 -26.120  4.00  0.00           C  
ATOM   3308  C   CNT A 208     -25.837 -41.711 -25.370  6.00  0.00           C  
ATOM   3309  C   CNT A 208     -25.551 -44.482 -26.000  6.00  0.00           C  
ATOM   3310  C   CNT A 208     -26.403 -44.086 -24.980  5.00  0.00           C  
ATOM   3311  C   CNT A 208     -26.560 -42.694 -24.680  9.00  0.00           C  
ATOM   3312  C   CNT A 208     -27.125 -42.402 -23.410  4.00  0.00           C  
ATOM   3313  C   CNT A 208     -26.990 -45.058 -24.160  0.00  0.00           C  
ATOM   3314  C   CNT A 208     -27.109 -44.765 -22.790  1.00  0.00           C  
ATOM   3315  C   CNT A 208     -27.133 -43.420 -22.390  9.00  0.00           C  
ATOM   3316  C   CNT A 208     -27.022 -43.091 -21.040  3.00  0.00           C  
ATOM   3317  C   CNT A 208     -26.782 -45.720 -21.790  1.00  0.00           C  
ATOM   3318  C   CNT A 208     -26.155 -45.316 -20.570  0.00  0.00           C  
ATOM   3319  C   CNT A 208     -26.240 -43.952 -20.250  3.00  0.00           C  
ATOM   3320  C   CNT A 208     -25.365 -43.373 -19.310  5.00  0.00           C  
ATOM   3321  C   CNT A 208     -25.147 -46.102 -20.000  0.00  0.00           C  
ATOM   3322  C   CNT A 208     -24.032 -45.440 -19.440  0.00  0.00           C  
ATOM   3323  C   CNT A 208     -24.174 -44.109 -18.970  1.00  0.00           C  
ATOM   3324  C   CNT A 208     -23.008 -43.383 -18.710  1.00  0.00           C  
ATOM   3325  C   CNT A 208     -22.770 -46.024 -19.570  5.00  0.00           C  
ATOM   3326  C   CNT A 208     -21.657 -45.206 -19.600  9.00  0.00           C  
ATOM   3327  C   CNT A 208     -21.760 -43.863 -19.230  8.00  0.00           C  
ATOM   3328  C   CNT A 208     -20.777 -42.967 -19.690  2.00  0.00           C  
ATOM   3329  C   CNT A 208     -20.621 -45.631 -20.410  6.00  0.00           C  
ATOM   3330  C   CNT A 208     -19.744 -44.709 -21.040  5.00  0.00           C  
ATOM   3331  C   CNT A 208     -19.953 -43.339 -20.710  2.00  0.00           C  
ATOM   3332  C   CNT A 208     -19.514 -42.319 -21.660  5.00  0.00           C  
ATOM   3333  C   CNT A 208     -19.163 -45.094 -22.250  7.00  0.00           C  
ATOM   3334  C   CNT A 208     -19.203 -44.101 -23.360  6.00  0.00           C  
ATOM   3335  C   CNT A 208     -19.303 -42.720 -23.020  2.00  0.00           C  
ATOM   3336  C   CNT A 208     -19.552 -41.705 -23.970  2.00  0.00           C  
ATOM   3337  C   CNT A 208     -19.493 -44.448 -24.680  0.00  0.00           C  
ATOM   3338  C   CNT A 208     -20.135 -43.498 -25.510  9.00  0.00           C  
ATOM   3339  C   CNT A 208     -20.339 -42.188 -25.020  7.00  0.00           C  
ATOM   3340  C   CNT A 208     -21.276 -41.363 -25.650  6.00  0.00           C  
ATOM   3341  C   CNT A 208     -21.349 -39.996 -25.340  0.00  0.00           C  
ATOM   3342  C   CNT A 208     -22.584 -39.282 -25.610  9.00  0.00           C  
ATOM   3343  C   CNT A 208     -22.727 -37.916 -25.160  0.00  0.00           C  
ATOM   3344  C   CNT A 208     -23.965 -37.340 -25.040  2.00  0.00           C  
ATOM   3345  C   CNT A 208     -23.702 -40.008 -25.870  6.00  0.00           C  
ATOM   3346  C   CNT A 208     -24.981 -39.497 -25.420  1.00  0.00           C  
ATOM   3347  C   CNT A 208     -25.126 -38.147 -25.010  8.00  0.00           C  
ATOM   3348  C   CNT A 208     -26.230 -37.723 -24.280  4.00  0.00           C  
ATOM   3349  C   CNT A 208     -25.975 -40.370 -25.020  2.00  0.00           C  
ATOM   3350  C   CNT A 208     -26.781 -40.077 -23.960  4.00  0.00           C  
ATOM   3351  C   CNT A 208     -26.908 -38.751 -23.520  5.00  0.00           C  
ATOM   3352  C   CNT A 208     -27.378 -38.405 -22.230  1.00  0.00           C  
ATOM   3353  C   CNT A 208     -27.223 -41.041 -23.040  2.00  0.00           C  
ATOM   3354  C   CNT A 208     -27.357 -40.734 -21.620  4.00  0.00           C  
ATOM   3355  C   CNT A 208     -27.426 -39.400 -21.240  0.00  0.00           C  
ATOM   3356  C   CNT A 208     -27.298 -39.005 -19.920  4.00  0.00           C  
ATOM   3357  C   CNT A 208     -27.111 -41.702 -20.700  1.00  0.00           C  
ATOM   3358  C   CNT A 208     -26.532 -41.277 -19.460  7.00  0.00           C  
ATOM   3359  C   CNT A 208     -26.617 -39.922 -19.080  7.00  0.00           C  
ATOM   3360  C   CNT A 208     -25.752 -39.417 -18.070  3.00  0.00           C  
ATOM   3361  C   CNT A 208     -25.530 -42.061 -18.830  9.00  0.00           C  
ATOM   3362  C   CNT A 208     -24.419 -41.472 -18.200  8.00  0.00           C  
ATOM   3363  C   CNT A 208     -24.508 -40.085 -17.890  0.00  0.00           C  
ATOM   3364  C   CNT A 208     -23.340 -39.308 -17.700  2.00  0.00           C  
ATOM   3365  C   CNT A 208     -23.107 -42.005 -18.310  7.00  0.00           C  
ATOM   3366  C   CNT A 208     -21.996 -41.164 -18.550  1.00  0.00           C  
ATOM   3367  C   CNT A 208     -22.081 -39.836 -18.160  6.00  0.00           C  
ATOM   3368  C   CNT A 208     -21.088 -38.945 -18.570  1.00  0.00           C  
ATOM   3369  C   CNT A 208     -20.934 -41.594 -19.320  6.00  0.00           C  
ATOM   3370  C   CNT A 208     -20.156 -40.663 -19.990  4.00  0.00           C  
ATOM   3371  C   CNT A 208     -20.325 -39.303 -19.690  1.00  0.00           C  
ATOM   3372  C   CNT A 208     -19.867 -38.260 -20.550  6.00  0.00           C  
ATOM   3373  C   CNT A 208     -19.696 -40.963 -21.270  8.00  0.00           C  
ATOM   3374  C   CNT A 208     -19.540 -39.933 -22.280  5.00  0.00           C  
ATOM   3375  C   CNT A 208     -19.673 -38.593 -21.920  0.00  0.00           C  
ATOM   3376  C   CNT A 208     -19.948 -37.642 -22.890  8.00  0.00           C  
ATOM   3377  C   CNT A 208     -19.691 -40.348 -23.650  5.00  0.00           C  
ATOM   3378  C   CNT A 208     -20.467 -39.411 -24.460  3.00  0.00           C  
ATOM   3379  C   CNT A 208     -20.578 -38.039 -24.080  6.00  0.00           C  
ATOM   3380  C   CNT A 208     -21.657 -37.272 -24.570  5.00  0.00           C  
ATOM   3381  C   CNT A 208     -21.768 -35.940 -24.080  1.00  0.00           C  
ATOM   3382  C   CNT A 208     -22.945 -35.221 -24.330  0.00  0.00           C  
ATOM   3383  C   CNT A 208     -23.023 -33.894 -24.010  6.00  0.00           C  
ATOM   3384  C   CNT A 208     -24.298 -33.292 -23.990  0.00  0.00           C  
ATOM   3385  C   CNT A 208     -24.109 -35.978 -24.710  7.00  0.00           C  
ATOM   3386  C   CNT A 208     -25.336 -35.478 -24.250  2.00  0.00           C  
ATOM   3387  C   CNT A 208     -25.462 -34.105 -23.950  6.00  0.00           C  
ATOM   3388  C   CNT A 208     -26.492 -33.732 -23.080  4.00  0.00           C  
ATOM   3389  C   CNT A 208     -26.320 -36.381 -23.880  1.00  0.00           C  
ATOM   3390  C   CNT A 208     -27.193 -36.041 -22.790  3.00  0.00           C  
ATOM   3391  C   CNT A 208     -27.264 -34.704 -22.390  9.00  0.00           C  
ATOM   3392  C   CNT A 208     -27.742 -34.422 -21.140  3.00  0.00           C  
ATOM   3393  C   CNT A 208     -27.525 -37.061 -21.830  7.00  0.00           C  
ATOM   3394  C   CNT A 208     -27.631 -36.745 -20.480  8.00  0.00           C  
ATOM   3395  C   CNT A 208     -27.869 -35.408 -20.120  6.00  0.00           C  
ATOM   3396  C   CNT A 208     -27.584 -35.036 -18.790  1.00  0.00           C  
ATOM   3397  C   CNT A 208     -27.395 -37.697 -19.540  5.00  0.00           C  
ATOM   3398  C   CNT A 208     -26.837 -37.286 -18.310  0.00  0.00           C  
ATOM   3399  C   CNT A 208     -26.952 -35.918 -17.930  4.00  0.00           C  
ATOM   3400  C   CNT A 208     -25.983 -35.410 -17.060  1.00  0.00           C  
ATOM   3401  C   CNT A 208     -25.796 -38.110 -17.700  3.00  0.00           C  
ATOM   3402  C   CNT A 208     -24.690 -37.409 -17.150  8.00  0.00           C  
ATOM   3403  C   CNT A 208     -24.728 -36.032 -16.970  1.00  0.00           C  
ATOM   3404  C   CNT A 208     -23.606 -35.334 -16.500  6.00  0.00           C  
ATOM   3405  C   CNT A 208     -23.439 -37.989 -17.280  6.00  0.00           C  
ATOM   3406  C   CNT A 208     -22.252 -37.229 -17.340  6.00  0.00           C  
ATOM   3407  C   CNT A 208     -22.339 -35.821 -16.910  9.00  0.00           C  
ATOM   3408  C   CNT A 208     -21.486 -34.896 -17.460  9.00  0.00           C  
ATOM   3409  C   CNT A 208     -21.207 -37.609 -18.120  1.00  0.00           C  
ATOM   3410  C   CNT A 208     -20.418 -36.669 -18.820  6.00  0.00           C  
ATOM   3411  C   CNT A 208     -20.636 -35.280 -18.480  1.00  0.00           C  
ATOM   3412  C   CNT A 208     -20.232 -34.318 -19.370  1.00  0.00           C  
ATOM   3413  C   CNT A 208     -20.011 -36.942 -20.140  8.00  0.00           C  
ATOM   3414  C   CNT A 208     -19.856 -35.943 -21.060  7.00  0.00           C  
ATOM   3415  C   CNT A 208     -20.059 -34.602 -20.700  3.00  0.00           C  
ATOM   3416  C   CNT A 208     -20.309 -33.600 -21.660  2.00  0.00           C  
ATOM   3417  C   CNT A 208     -20.000 -36.226 -22.470  1.00  0.00           C  
ATOM   3418  C   CNT A 208     -20.773 -35.343 -23.320  3.00  0.00           C  
ATOM   3419  C   CNT A 208     -20.865 -33.986 -22.930  6.00  0.00           C  
ATOM   3420  C   CNT A 208     -21.887 -33.229 -23.490  5.00  0.00           C  
ATOM   3421  C   CNT A 208     -22.127 -31.879 -23.000  6.00  0.00           C  
ATOM   3422  C   CNT A 208     -23.254 -31.198 -23.300  0.00  0.00           C  
ATOM   3423  C   CNT A 208     -23.323 -29.787 -22.930  0.00  0.00           C  
ATOM   3424  C   CNT A 208     -24.605 -29.252 -22.810  8.00  0.00           C  
ATOM   3425  C   CNT A 208     -24.405 -31.961 -23.560  4.00  0.00           C  
ATOM   3426  C   CNT A 208     -25.634 -31.483 -23.130  7.00  0.00           C  
ATOM   3427  C   CNT A 208     -25.781 -30.091 -22.850  6.00  0.00           C  
ATOM   3428  C   CNT A 208     -26.902 -29.660 -22.050  9.00  0.00           C  
ATOM   3429  C   CNT A 208     -26.581 -32.391 -22.680  8.00  0.00           C  
ATOM   3430  C   CNT A 208     -27.361 -32.062 -21.580  9.00  0.00           C  
ATOM   3431  C   CNT A 208     -27.653 -30.689 -21.250  6.00  0.00           C  
ATOM   3432  C   CNT A 208     -28.018 -30.329 -19.970  6.00  0.00           C  
ATOM   3433  C   CNT A 208     -27.885 -33.060 -20.750  1.00  0.00           C  
ATOM   3434  C   CNT A 208     -27.911 -32.714 -19.420  4.00  0.00           C  
ATOM   3435  C   CNT A 208     -28.064 -31.366 -19.010  6.00  0.00           C  
ATOM   3436  C   CNT A 208     -27.904 -30.997 -17.670  3.00  0.00           C  
ATOM   3437  C   CNT A 208     -27.747 -33.686 -18.400  5.00  0.00           C  
ATOM   3438  C   CNT A 208     -27.190 -33.279 -17.180  8.00  0.00           C  
ATOM   3439  C   CNT A 208     -27.213 -31.900 -16.820  0.00  0.00           C  
ATOM   3440  C   CNT A 208     -26.386 -31.361 -15.830  3.00  0.00           C  
ATOM   3441  C   CNT A 208     -26.151 -34.071 -16.620  7.00  0.00           C  
ATOM   3442  C   CNT A 208     -25.062 -33.444 -15.930  6.00  0.00           C  
ATOM   3443  C   CNT A 208     -25.158 -32.106 -15.560  0.00  0.00           C  
ATOM   3444  C   CNT A 208     -24.032 -31.378 -15.260  8.00  0.00           C  
ATOM   3445  C   CNT A 208     -23.800 -33.973 -16.030  8.00  0.00           C  
ATOM   3446  C   CNT A 208     -22.662 -33.185 -16.120  2.00  0.00           C  
ATOM   3447  C   CNT A 208     -22.810 -31.852 -15.670  1.00  0.00           C  
ATOM   3448  C   CNT A 208     -21.804 -30.980 -16.210  5.00  0.00           C  
ATOM   3449  C   CNT A 208     -21.636 -33.559 -17.060  1.00  0.00           C  
ATOM   3450  C   CNT A 208     -20.847 -32.637 -17.710  2.00  0.00           C  
ATOM   3451  C   CNT A 208     -20.918 -31.241 -17.280  1.00  0.00           C  
ATOM   3452  C   CNT A 208     -20.559 -30.250 -18.190  4.00  0.00           C  
ATOM   3453  C   CNT A 208     -20.337 -32.973 -18.940  8.00  0.00           C  
ATOM   3454  C   CNT A 208     -20.210 -31.897 -19.890  0.00  0.00           C  
ATOM   3455  C   CNT A 208     -20.323 -30.570 -19.530  1.00  0.00           C  
ATOM   3456  C   CNT A 208     -20.759 -29.652 -20.430  9.00  0.00           C  
ATOM   3457  C   CNT A 208     -20.472 -32.238 -21.250  0.00  0.00           C  
ATOM   3458  C   CNT A 208     -21.238 -31.379 -22.030  6.00  0.00           C  
ATOM   3459  C   CNT A 208     -21.398 -30.047 -21.610  8.00  0.00           C  
ATOM   3460  C   CNT A 208     -22.330 -29.201 -22.130  6.00  0.00           C  
ATOM   3461  C   CNT A 208     -22.385 -27.842 -21.890  0.00  0.00           C  
ATOM   3462  C   CNT A 208     -23.555 -27.125 -22.260  5.00  0.00           C  
ATOM   3463  C   CNT A 208     -23.744 -25.782 -21.820  6.00  0.00           C  
ATOM   3464  C   CNT A 208     -25.037 -25.214 -21.770  6.00  0.00           C  
ATOM   3465  C   CNT A 208     -24.705 -27.909 -22.440  6.00  0.00           C  
ATOM   3466  C   CNT A 208     -25.981 -27.420 -22.040  5.00  0.00           C  
ATOM   3467  C   CNT A 208     -26.101 -26.086 -21.600  5.00  0.00           C  
ATOM   3468  C   CNT A 208     -27.172 -25.713 -20.820  4.00  0.00           C  
ATOM   3469  C   CNT A 208     -27.008 -28.298 -21.650  2.00  0.00           C  
ATOM   3470  C   CNT A 208     -27.723 -27.981 -20.510  8.00  0.00           C  
ATOM   3471  C   CNT A 208     -27.910 -26.670 -20.080  1.00  0.00           C  
ATOM   3472  C   CNT A 208     -28.539 -26.373 -18.900  2.00  0.00           C  
ATOM   3473  C   CNT A 208     -28.034 -28.982 -19.630  8.00  0.00           C  
ATOM   3474  C   CNT A 208     -28.376 -28.692 -18.300  1.00  0.00           C  
ATOM   3475  C   CNT A 208     -28.632 -27.395 -17.910  0.00  0.00           C  
ATOM   3476  C   CNT A 208     -28.345 -27.037 -16.520  9.00  0.00           C  
ATOM   3477  C   CNT A 208     -28.057 -29.620 -17.310  9.00  0.00           C  
ATOM   3478  C   CNT A 208     -27.501 -29.230 -16.090  6.00  0.00           C  
ATOM   3479  C   CNT A 208     -27.606 -27.880 -15.700  7.00  0.00           C  
ATOM   3480  C   CNT A 208     -26.738 -27.323 -14.670  0.00  0.00           C  
ATOM   3481  C   CNT A 208     -26.434 -29.986 -15.520  6.00  0.00           C  
ATOM   3482  C   CNT A 208     -25.380 -29.364 -14.870  3.00  0.00           C  
ATOM   3483  C   CNT A 208     -25.571 -28.084 -14.400  0.00  0.00           C  
ATOM   3484  C   CNT A 208     -24.409 -27.274 -14.210  4.00  0.00           C  
ATOM   3485  C   CNT A 208     -24.141 -30.029 -14.950  5.00  0.00           C  
ATOM   3486  C   CNT A 208     -23.007 -29.183 -15.040  2.00  0.00           C  
ATOM   3487  C   CNT A 208     -23.210 -27.821 -14.660  0.00  0.00           C  
ATOM   3488  C   CNT A 208     -22.217 -26.872 -15.110  7.00  0.00           C  
ATOM   3489  C   CNT A 208     -21.936 -29.635 -15.820  2.00  0.00           C  
ATOM   3490  C   CNT A 208     -21.143 -28.619 -16.430  1.00  0.00           C  
ATOM   3491  C   CNT A 208     -21.272 -27.223 -16.080  1.00  0.00           C  
ATOM   3492  C   CNT A 208     -20.818 -26.206 -17.010  0.00  0.00           C  
ATOM   3493  C   CNT A 208     -20.638 -28.906 -17.740  5.00  0.00           C  
ATOM   3494  C   CNT A 208     -20.578 -27.879 -18.700  3.00  0.00           C  
ATOM   3495  C   CNT A 208     -20.733 -26.544 -18.390  8.00  0.00           C  
ATOM   3496  C   CNT A 208     -21.099 -25.541 -19.290  8.00  0.00           C  
ATOM   3497  C   CNT A 208     -20.873 -28.314 -20.000  1.00  0.00           C  
ATOM   3498  C   CNT A 208     -21.585 -27.334 -20.810  4.00  0.00           C  
ATOM   3499  C   CNT A 208     -21.650 -25.960 -20.510  4.00  0.00           C  
ATOM   3500  C   CNT A 208     -22.712 -25.218 -21.040  0.00  0.00           C  
ATOM   3501  C   CNT A 208     -22.770 -23.817 -20.750  8.00  0.00           C  
ATOM   3502  C   CNT A 208     -24.007 -23.151 -21.010  8.00  0.00           C  
ATOM   3503  C   CNT A 208     -24.170 -21.851 -20.640  9.00  0.00           C  
ATOM   3504  C   CNT A 208     -25.429 -21.320 -20.550  2.00  0.00           C  
ATOM   3505  C   CNT A 208     -25.163 -23.929 -21.270  4.00  0.00           C  
ATOM   3506  C   CNT A 208     -26.421 -23.443 -20.830  0.00  0.00           C  
ATOM   3507  C   CNT A 208     -26.547 -22.113 -20.380  9.00  0.00           C  
ATOM   3508  C   CNT A 208     -27.726 -21.676 -19.670  6.00  0.00           C  
ATOM   3509  C   CNT A 208     -27.426 -24.366 -20.440  7.00  0.00           C  
ATOM   3510  C   CNT A 208     -28.342 -24.050 -19.460  1.00  0.00           C  
ATOM   3511  C   CNT A 208     -28.519 -22.697 -19.070  8.00  0.00           C  
ATOM   3512  C   CNT A 208     -28.873 -22.380 -17.730  9.00  0.00           C  
ATOM   3513  C   CNT A 208     -28.596 -25.052 -18.520  4.00  0.00           C  
ATOM   3514  C   CNT A 208     -28.673 -24.701 -17.160  0.00  0.00           C  
ATOM   3515  C   CNT A 208     -28.940 -23.372 -16.770  0.00  0.00           C  
ATOM   3516  C   CNT A 208     -28.647 -23.001 -15.450  2.00  0.00           C  
ATOM   3517  C   CNT A 208     -28.357 -25.680 -16.190  7.00  0.00           C  
ATOM   3518  C   CNT A 208     -27.803 -25.219 -14.990  8.00  0.00           C  
ATOM   3519  C   CNT A 208     -27.889 -23.902 -14.650  4.00  0.00           C  
ATOM   3520  C   CNT A 208     -27.092 -23.330 -13.610  8.00  0.00           C  
ATOM   3521  C   CNT A 208     -26.868 -26.014 -14.290  2.00  0.00           C  
ATOM   3522  C   CNT A 208     -25.786 -25.400 -13.690  3.00  0.00           C  
ATOM   3523  C   CNT A 208     -25.901 -24.079 -13.300  1.00  0.00           C  
ATOM   3524  C   CNT A 208     -24.752 -23.354 -12.980  0.00  0.00           C  
ATOM   3525  C   CNT A 208     -24.497 -25.956 -13.810  8.00  0.00           C  
ATOM   3526  C   CNT A 208     -23.434 -25.096 -13.960  4.00  0.00           C  
ATOM   3527  C   CNT A 208     -23.530 -23.783 -13.480  2.00  0.00           C  
ATOM   3528  C   CNT A 208     -22.551 -22.893 -13.970  3.00  0.00           C  
ATOM   3529  C   CNT A 208     -22.340 -25.471 -14.710  3.00  0.00           C  
ATOM   3530  C   CNT A 208     -21.594 -24.524 -15.400  3.00  0.00           C  
ATOM   3531  C   CNT A 208     -21.682 -23.199 -15.020  5.00  0.00           C  
ATOM   3532  C   CNT A 208     -21.150 -22.191 -15.910  6.00  0.00           C  
ATOM   3533  C   CNT A 208     -20.962 -24.823 -16.650  7.00  0.00           C  
ATOM   3534  C   CNT A 208     -20.953 -23.796 -17.620  2.00  0.00           C  
ATOM   3535  C   CNT A 208     -20.968 -22.483 -17.210  9.00  0.00           C  
ATOM   3536  C   CNT A 208     -21.340 -21.583 -18.240  0.00  0.00           C  
ATOM   3537  C   CNT A 208     -21.177 -24.232 -18.980  7.00  0.00           C  
ATOM   3538  C   CNT A 208     -21.873 -23.352 -19.780  9.00  0.00           C  
ATOM   3539  C   CNT A 208     -22.065 -22.052 -19.340  2.00  0.00           C  
ATOM   3540  C   CNT A 208     -23.080 -21.241 -20.010  8.00  0.00           C  
ATOM   3541  C   CNT A 208     -23.120 -19.869 -19.660  3.00  0.00           C  
ATOM   3542  C   CNT A 208     -24.326 -19.223 -19.990  0.00  0.00           C  
ATOM   3543  C   CNT A 208     -24.457 -17.825 -19.790  0.00  0.00           C  
ATOM   3544  C   CNT A 208     -25.754 -17.289 -19.970  6.00  0.00           C  
ATOM   3545  C   CNT A 208     -25.502 -19.968 -20.160  9.00  0.00           C  
ATOM   3546  C   CNT A 208     -26.742 -19.448 -19.740  1.00  0.00           C  
ATOM   3547  C   CNT A 208     -26.913 -18.064 -19.560  8.00  0.00           C  
ATOM   3548  C   CNT A 208     -28.007 -17.715 -18.740  3.00  0.00           C  
ATOM   3549  C   CNT A 208     -27.732 -20.347 -19.260  5.00  0.00           C  
ATOM   3550  C   CNT A 208     -28.545 -19.960 -18.150  9.00  0.00           C  
ATOM   3551  C   CNT A 208     -28.715 -18.612 -17.840  6.00  0.00           C  
ATOM   3552  C   CNT A 208     -29.451 -18.367 -16.600  3.00  0.00           C  
ATOM   3553  C   CNT A 208     -29.017 -20.990 -17.350  7.00  0.00           C  
ATOM   3554  C   CNT A 208     -29.290 -20.661 -15.960  1.00  0.00           C  
ATOM   3555  C   CNT A 208     -29.406 -19.304 -15.540  6.00  0.00           C  
ATOM   3556  C   CNT A 208     -29.278 -19.109 -14.170  0.00  0.00           C  
ATOM   3557  C   CNT A 208     -28.831 -21.671 -15.020  9.00  0.00           C  
ATOM   3558  C   CNT A 208     -28.187 -21.188 -13.860  0.00  0.00           C  
ATOM   3559  C   CNT A 208     -28.401 -19.850 -13.400  4.00  0.00           C  
ATOM   3560  C   CNT A 208     -27.489 -19.523 -12.370  4.00  0.00           C  
ATOM   3561  C   CNT A 208     -27.237 -22.021 -13.230  8.00  0.00           C  
ATOM   3562  C   CNT A 208     -26.145 -21.394 -12.650  2.00  0.00           C  
ATOM   3563  C   CNT A 208     -26.255 -20.080 -12.200  1.00  0.00           C  
ATOM   3564  C   CNT A 208     -25.079 -19.524 -11.720  1.00  0.00           C  
ATOM   3565  C   CNT A 208     -24.927 -22.020 -12.760  3.00  0.00           C  
ATOM   3566  C   CNT A 208     -23.763 -21.212 -12.770  5.00  0.00           C  
ATOM   3567  C   CNT A 208     -23.825 -19.907 -12.240  7.00  0.00           C  
ATOM   3568  C   CNT A 208     -22.726 -19.103 -12.620  2.00  0.00           C  
ATOM   3569  C   CNT A 208     -22.646 -21.547 -13.580  6.00  0.00           C  
ATOM   3570  C   CNT A 208     -21.841 -20.586 -14.260  6.00  0.00           C  
ATOM   3571  C   CNT A 208     -21.981 -19.245 -13.800  1.00  0.00           C  
ATOM   3572  C   CNT A 208     -21.476 -18.299 -14.710  6.00  0.00           C  
ATOM   3573  C   CNT A 208     -21.303 -20.864 -15.550  3.00  0.00           C  
ATOM   3574  C   CNT A 208     -21.261 -19.851 -16.490  7.00  0.00           C  
ATOM   3575  C   CNT A 208     -21.412 -18.455 -16.120  0.00  0.00           C  
ATOM   3576  C   CNT A 208     -21.606 -17.638 -17.250  3.00  0.00           C  
ATOM   3577  C   CNT A 208     -21.453 -20.205 -17.870  5.00  0.00           C  
ATOM   3578  C   CNT A 208     -22.188 -19.370 -18.700  5.00  0.00           C  
ATOM   3579  C   CNT A 208     -22.253 -18.023 -18.430  1.00  0.00           C  
ATOM   3580  C   CNT A 208     -23.225 -17.315 -19.260  6.00  0.00           C  
END
