# Supplementary material for: Molecular Dynamics Study of the Interaction of Carbon Nanotubes with Telomeric DNA Fragment Containing Noncanonical G-Quadruplex and i-Motif Forms
Source: Int J Mol Sci. 2020 Mar 11;21(6):1925. doi: 10.3390/ijms21061925 (PMC7139311; doi:10.3390/ijms21061925)
Supplement: Supplementary file 1 [file ijms-21-01925-s001.zip › fig7_a20.pdb]

ATOM      1  C5' DG5 A   1     -51.263   4.470 -14.920  8.00  0.00           C  
ATOM      2  O5' DG5 A   1     -52.389   4.402 -14.030  1.00  0.00           O  
ATOM      3  C4' DG5 A   1     -51.470   5.393 -16.140  5.00  0.00           C  
ATOM      4  O4' DG5 A   1     -52.203   4.735 -17.150  9.00  0.00           O  
ATOM      5  C3' DG5 A   1     -52.298   6.677 -15.690  4.00  0.00           C  
ATOM      6  O3' DG5 A   1     -51.704   7.735 -16.460  5.00  0.00           O  
ATOM      7  C2' DG5 A   1     -53.693   6.447 -16.250  7.00  0.00           C  
ATOM      8  C1' DG5 A   1     -53.391   5.541 -17.470  6.00  0.00           C  
ATOM      9  N1  DG5 A   1     -56.629   4.337 -21.220  2.00  0.00           N  
ATOM     10  C2  DG5 A   1     -55.917   5.424 -21.110  8.00  0.00           C  
ATOM     11  N2  DG5 A   1     -56.077   6.283 -22.080  5.00  0.00           N  
ATOM     12  N3  DG5 A   1     -55.174   5.791 -20.090  7.00  0.00           N  
ATOM     13  C4  DG5 A   1     -55.375   4.929 -19.010  2.00  0.00           C  
ATOM     14  C5  DG5 A   1     -56.241   3.885 -18.940  9.00  0.00           C  
ATOM     15  C6  DG5 A   1     -56.909   3.477 -20.160  0.00  0.00           C  
ATOM     16  O6  DG5 A   1     -57.676   2.533 -20.360  3.00  0.00           O  
ATOM     17  N7  DG5 A   1     -56.192   3.219 -17.730  5.00  0.00           N  
ATOM     18  C8  DG5 A   1     -55.284   3.836 -17.100  0.00  0.00           C  
ATOM     19  N9  DG5 A   1     -54.629   4.852 -17.810  4.00  0.00           N  
ATOM     20 HO5' DG5 A   1     -52.098   3.954 -13.160  3.00  0.00           H  
ATOM     21  H1  DG5 A   1     -57.085   4.232 -22.110  7.00  0.00           H  
ATOM     22  H8  DG5 A   1     -54.900   3.527 -16.090  5.00  0.00           H  
ATOM     23  H1' DG5 A   1     -53.152   6.248 -18.320  3.00  0.00           H  
ATOM     24  H2' DG5 A   1     -54.292   5.925 -15.510  0.00  0.00           H  
ATOM     25  H21 DG5 A   1     -56.698   6.138 -22.840  8.00  0.00           H  
ATOM     26  H3' DG5 A   1     -52.496   6.892 -14.690  9.00  0.00           H  
ATOM     27  H22 DG5 A   1     -55.452   7.127 -21.960  3.00  0.00           H  
ATOM     28  H4' DG5 A   1     -50.537   5.769 -16.520  1.00  0.00           H  
ATOM     29  H5' DG5 A   1     -50.989   3.466 -15.310  8.00  0.00           H  
ATOM     30 H2'' DG5 A   1     -54.149   7.384 -16.540  7.00  0.00           H  
ATOM     31 H5'' DG5 A   1     -50.445   4.955 -14.380  8.00  0.00           H  
ATOM     32  P    DG A   2     -51.789   9.237 -16.080  3.00  0.00           P  
ATOM     33  C5'  DG A   2     -53.284  10.066 -18.130  0.00  0.00           C  
ATOM     34  O5'  DG A   2     -53.232   9.807 -16.690  1.00  0.00           O  
ATOM     35  C4'  DG A   2     -54.648  10.471 -18.650  0.00  0.00           C  
ATOM     36  O4'  DG A   2     -55.312   9.260 -18.990  2.00  0.00           O  
ATOM     37  C3'  DG A   2     -55.563  11.235 -17.750  7.00  0.00           C  
ATOM     38  O3'  DG A   2     -56.256  12.028 -18.630  6.00  0.00           O  
ATOM     39  C2'  DG A   2     -56.438  10.115 -17.210  2.00  0.00           C  
ATOM     40  C1'  DG A   2     -56.612   9.278 -18.450  5.00  0.00           C  
ATOM     41  N1   DG A   2     -60.034   5.958 -20.210  0.00  0.00           N  
ATOM     42  C2   DG A   2     -59.490   7.005 -20.850  1.00  0.00           C  
ATOM     43  N2   DG A   2     -60.134   7.437 -21.870  3.00  0.00           N  
ATOM     44  N3   DG A   2     -58.546   7.856 -20.330  8.00  0.00           N  
ATOM     45  C4   DG A   2     -58.196   7.495 -19.030  0.00  0.00           C  
ATOM     46  C5   DG A   2     -58.683   6.413 -18.290  4.00  0.00           C  
ATOM     47  C6   DG A   2     -59.591   5.503 -18.990  1.00  0.00           C  
ATOM     48  O6   DG A   2     -59.958   4.392 -18.670  1.00  0.00           O  
ATOM     49  N7   DG A   2     -58.045   6.264 -16.950  1.00  0.00           N  
ATOM     50  C8   DG A   2     -57.164   7.239 -17.040  2.00  0.00           C  
ATOM     51  N9   DG A   2     -57.246   8.026 -18.220  2.00  0.00           N  
ATOM     52  OP1  DG A   2     -50.789   9.935 -16.870  2.00  0.00           O  
ATOM     53  OP2  DG A   2     -51.702   9.370 -14.580  4.00  0.00           O1-
ATOM     54  H1   DG A   2     -60.615   5.379 -20.780  3.00  0.00           H  
ATOM     55  H8   DG A   2     -56.483   7.431 -16.220  2.00  0.00           H  
ATOM     56  H1'  DG A   2     -57.144   9.839 -19.210  9.00  0.00           H  
ATOM     57  H2'  DG A   2     -55.889   9.562 -16.400  1.00  0.00           H  
ATOM     58  H21  DG A   2     -60.933   6.950 -22.320  5.00  0.00           H  
ATOM     59  H3'  DG A   2     -55.052  11.868 -16.960  6.00  0.00           H  
ATOM     60  H22  DG A   2     -59.690   8.153 -22.370  2.00  0.00           H  
ATOM     61  H4'  DG A   2     -54.466  11.082 -19.490  7.00  0.00           H  
ATOM     62  H5'  DG A   2     -52.844   9.206 -18.580  0.00  0.00           H  
ATOM     63 H2''  DG A   2     -57.351  10.498 -16.850  1.00  0.00           H  
ATOM     64 H5''  DG A   2     -52.668  10.924 -18.330  7.00  0.00           H  
ATOM     65  P    DG A   3     -56.673  13.480 -18.350  1.00  0.00           P  
ATOM     66  C5'  DG A   3     -57.741  13.803 -20.740  6.00  0.00           C  
ATOM     67  O5'  DG A   3     -57.856  13.610 -19.400  0.00  0.00           O  
ATOM     68  C4'  DG A   3     -59.054  13.504 -21.580  5.00  0.00           C  
ATOM     69  O4'  DG A   3     -59.463  12.160 -21.360  7.00  0.00           O  
ATOM     70  C3'  DG A   3     -60.227  14.426 -21.030  5.00  0.00           C  
ATOM     71  O3'  DG A   3     -60.979  14.758 -22.220  2.00  0.00           O  
ATOM     72  C2'  DG A   3     -60.927  13.574 -20.020  0.00  0.00           C  
ATOM     73  C1'  DG A   3     -60.690  12.116 -20.560  5.00  0.00           C  
ATOM     74  N1   DG A   3     -62.937   7.640 -19.310  1.00  0.00           N  
ATOM     75  C2   DG A   3     -63.157   8.519 -20.360  2.00  0.00           C  
ATOM     76  N2   DG A   3     -64.161   8.157 -21.130  2.00  0.00           N  
ATOM     77  N3   DG A   3     -62.462   9.618 -20.640  2.00  0.00           N  
ATOM     78  C4   DG A   3     -61.514   9.862 -19.670  6.00  0.00           C  
ATOM     79  C5   DG A   3     -61.270   9.083 -18.540  9.00  0.00           C  
ATOM     80  C6   DG A   3     -61.954   7.838 -18.410  9.00  0.00           C  
ATOM     81  O6   DG A   3     -61.802   6.990 -17.530  5.00  0.00           O  
ATOM     82  N7   DG A   3     -60.330   9.725 -17.750  9.00  0.00           N  
ATOM     83  C8   DG A   3     -59.968  10.810 -18.440  5.00  0.00           C  
ATOM     84  N9   DG A   3     -60.702  10.987 -19.610  3.00  0.00           N  
ATOM     85  OP1  DG A   3     -55.567  14.350 -18.790  2.00  0.00           O  
ATOM     86  OP2  DG A   3     -57.180  13.588 -16.960  0.00  0.00           O1-
ATOM     87  H1   DG A   3     -63.336   6.735 -19.360  5.00  0.00           H  
ATOM     88  H8   DG A   3     -59.176  11.430 -18.020  1.00  0.00           H  
ATOM     89  H1'  DG A   3     -61.554  11.957 -21.220  1.00  0.00           H  
ATOM     90  H2'  DG A   3     -60.423  13.631 -19.020  2.00  0.00           H  
ATOM     91  H21  DG A   3     -64.665   7.303 -20.850  6.00  0.00           H  
ATOM     92  H3'  DG A   3     -59.904  15.273 -20.640  2.00  0.00           H  
ATOM     93  H22  DG A   3     -64.388   8.586 -21.990  5.00  0.00           H  
ATOM     94  H4'  DG A   3     -58.769  13.626 -22.610  8.00  0.00           H  
ATOM     95  H5'  DG A   3     -56.920  13.196 -21.160  2.00  0.00           H  
ATOM     96 H2''  DG A   3     -61.990  13.863 -19.910  2.00  0.00           H  
ATOM     97 H5''  DG A   3     -57.399  14.846 -20.900  1.00  0.00           H  
ATOM     98  P    DT A   4     -62.416  15.555 -22.250  0.00  0.00           P  
ATOM     99  C5'  DT A   4     -63.636  13.403 -22.940  2.00  0.00           C  
ATOM    100  O5'  DT A   4     -63.522  14.465 -21.990  2.00  0.00           O  
ATOM    101  C4'  DT A   4     -64.689  12.402 -22.430  3.00  0.00           C  
ATOM    102  O4'  DT A   4     -64.281  11.712 -21.280  2.00  0.00           O  
ATOM    103  C3'  DT A   4     -66.069  13.038 -22.180  0.00  0.00           C  
ATOM    104  O3'  DT A   4     -67.009  12.346 -22.970  8.00  0.00           O  
ATOM    105  C2'  DT A   4     -66.299  12.652 -20.670  0.00  0.00           C  
ATOM    106  C1'  DT A   4     -65.406  11.404 -20.520  7.00  0.00           C  
ATOM    107  N1   DT A   4     -64.972  11.157 -19.120  8.00  0.00           N  
ATOM    108  C2   DT A   4     -65.330   9.923 -18.530  6.00  0.00           C  
ATOM    109  O2   DT A   4     -66.204   9.193 -19.070  9.00  0.00           O  
ATOM    110  N3   DT A   4     -64.677   9.732 -17.320  4.00  0.00           N  
ATOM    111  C4   DT A   4     -63.678  10.526 -16.740  5.00  0.00           C  
ATOM    112  O4   DT A   4     -63.092  10.044 -15.790  1.00  0.00           O  
ATOM    113  C5   DT A   4     -63.464  11.844 -17.370  3.00  0.00           C  
ATOM    114  C6   DT A   4     -64.101  12.093 -18.570  2.00  0.00           C  
ATOM    115  C7   DT A   4     -62.498  12.803 -16.720  1.00  0.00           C  
ATOM    116  OP1  DT A   4     -62.567  16.049 -23.620  7.00  0.00           O  
ATOM    117  OP2  DT A   4     -62.430  16.479 -21.100  7.00  0.00           O1-
ATOM    118  H3   DT A   4     -64.739   8.810 -16.890  2.00  0.00           H  
ATOM    119  H6   DT A   4     -63.924  12.969 -19.090  5.00  0.00           H  
ATOM    120  H1'  DT A   4     -65.983  10.562 -21.020  4.00  0.00           H  
ATOM    121  H2'  DT A   4     -65.861  13.443 -20.110  9.00  0.00           H  
ATOM    122  H3'  DT A   4     -66.093  14.055 -22.320  1.00  0.00           H  
ATOM    123  H4'  DT A   4     -64.904  11.651 -23.190  1.00  0.00           H  
ATOM    124  H5'  DT A   4     -62.638  12.975 -23.020  2.00  0.00           H  
ATOM    125  H71  DT A   4     -61.443  12.523 -16.690  2.00  0.00           H  
ATOM    126  H72  DT A   4     -62.658  13.822 -17.150  9.00  0.00           H  
ATOM    127  H73  DT A   4     -62.808  12.879 -15.620  5.00  0.00           H  
ATOM    128 H2''  DT A   4     -67.314  12.501 -20.370  0.00  0.00           H  
ATOM    129 H5''  DT A   4     -63.974  13.717 -23.930  6.00  0.00           H  
ATOM    130  P    DT A   5     -68.589  12.737 -22.920  3.00  0.00           P  
ATOM    131  C5'  DT A   5     -69.143  10.552 -21.660  8.00  0.00           C  
ATOM    132  O5'  DT A   5     -69.223  11.951 -21.730  7.00  0.00           O  
ATOM    133  C4'  DT A   5     -69.896   9.874 -20.510  0.00  0.00           C  
ATOM    134  O4'  DT A   5     -68.971  10.011 -19.490  1.00  0.00           O  
ATOM    135  C3'  DT A   5     -71.234  10.462 -20.090  2.00  0.00           C  
ATOM    136  O3'  DT A   5     -72.284   9.489 -20.020  7.00  0.00           O  
ATOM    137  C2'  DT A   5     -70.802  11.082 -18.730  8.00  0.00           C  
ATOM    138  C1'  DT A   5     -69.617  10.158 -18.270  9.00  0.00           C  
ATOM    139  N1   DT A   5     -68.621  10.625 -17.290  7.00  0.00           N  
ATOM    140  C2   DT A   5     -68.195   9.677 -16.310  4.00  0.00           C  
ATOM    141  O2   DT A   5     -68.533   8.539 -16.300  5.00  0.00           O  
ATOM    142  N3   DT A   5     -67.309  10.125 -15.370  7.00  0.00           N  
ATOM    143  C4   DT A   5     -66.810  11.391 -15.320  3.00  0.00           C  
ATOM    144  O4   DT A   5     -65.972  11.684 -14.500  0.00  0.00           O  
ATOM    145  C5   DT A   5     -67.333  12.346 -16.300  3.00  0.00           C  
ATOM    146  C6   DT A   5     -68.158  11.937 -17.270  8.00  0.00           C  
ATOM    147  C7   DT A   5     -66.705  13.735 -16.460  1.00  0.00           C  
ATOM    148  OP1  DT A   5     -69.210  12.184 -24.170  8.00  0.00           O  
ATOM    149  OP2  DT A   5     -68.684  14.167 -22.650  5.00  0.00           O1-
ATOM    150  H3   DT A   5     -67.031   9.444 -14.710  0.00  0.00           H  
ATOM    151  H6   DT A   5     -68.494  12.676 -18.050  2.00  0.00           H  
ATOM    152  H1'  DT A   5     -69.972   9.091 -18.100  2.00  0.00           H  
ATOM    153  H2'  DT A   5     -70.318  11.983 -19.000  4.00  0.00           H  
ATOM    154  H3'  DT A   5     -71.603  11.262 -20.800  6.00  0.00           H  
ATOM    155  H4'  DT A   5     -69.914   8.837 -20.730  1.00  0.00           H  
ATOM    156  H5'  DT A   5     -68.104  10.191 -21.660  5.00  0.00           H  
ATOM    157  H71  DT A   5     -67.123  14.260 -17.350  5.00  0.00           H  
ATOM    158  H72  DT A   5     -66.766  14.493 -15.730  0.00  0.00           H  
ATOM    159  H73  DT A   5     -65.679  13.679 -16.700  0.00  0.00           H  
ATOM    160 H2''  DT A   5     -71.566  11.159 -17.990  9.00  0.00           H  
ATOM    161 H5''  DT A   5     -69.626  10.211 -22.570  2.00  0.00           H  
ATOM    162  P    DA A   6     -73.829   9.847 -19.590  7.00  0.00           P  
ATOM    163  C5'  DA A   6     -73.672   8.567 -17.390  8.00  0.00           C  
ATOM    164  O5'  DA A   6     -73.725   9.829 -18.070  4.00  0.00           O  
ATOM    165  C4'  DA A   6     -73.665   8.620 -15.850  3.00  0.00           C  
ATOM    166  O4'  DA A   6     -72.382   8.951 -15.340  2.00  0.00           O  
ATOM    167  C3'  DA A   6     -74.733   9.474 -15.210  5.00  0.00           C  
ATOM    168  O3'  DA A   6     -75.231   8.881 -14.030  1.00  0.00           O  
ATOM    169  C2'  DA A   6     -73.829  10.618 -14.760  9.00  0.00           C  
ATOM    170  C1'  DA A   6     -72.508   9.912 -14.300  7.00  0.00           C  
ATOM    171  N1   DA A   6     -68.203  10.606 -11.660  3.00  0.00           N  
ATOM    172  C2   DA A   6     -69.001   9.514 -11.800  5.00  0.00           C  
ATOM    173  N3   DA A   6     -70.042   9.388 -12.650  8.00  0.00           N  
ATOM    174  C4   DA A   6     -70.304  10.538 -13.330  3.00  0.00           C  
ATOM    175  C5   DA A   6     -69.614  11.720 -13.340  7.00  0.00           C  
ATOM    176  C6   DA A   6     -68.540  11.684 -12.370  8.00  0.00           C  
ATOM    177  N6   DA A   6     -67.655  12.693 -12.280  5.00  0.00           N  
ATOM    178  N7   DA A   6     -70.069  12.645 -14.330  0.00  0.00           N  
ATOM    179  C8   DA A   6     -71.046  11.974 -14.850  8.00  0.00           C  
ATOM    180  N9   DA A   6     -71.261  10.761 -14.240  0.00  0.00           N  
ATOM    181  OP1  DA A   6     -74.745   8.751 -20.030  6.00  0.00           O  
ATOM    182  OP2  DA A   6     -74.134  11.249 -19.990  2.00  0.00           O1-
ATOM    183  H2   DA A   6     -68.739   8.647 -11.170  9.00  0.00           H  
ATOM    184  H8   DA A   6     -71.626  12.434 -15.570  7.00  0.00           H  
ATOM    185  H1'  DA A   6     -72.675   9.424 -13.350  9.00  0.00           H  
ATOM    186  H2'  DA A   6     -73.683  11.363 -15.580  0.00  0.00           H  
ATOM    187  H3'  DA A   6     -75.530   9.779 -15.830  4.00  0.00           H  
ATOM    188  H4'  DA A   6     -73.850   7.572 -15.670  6.00  0.00           H  
ATOM    189  H5'  DA A   6     -72.767   8.126 -17.680  7.00  0.00           H  
ATOM    190  H61  DA A   6     -66.822  12.528 -11.740  8.00  0.00           H  
ATOM    191  H62  DA A   6     -67.841  13.590 -12.630  7.00  0.00           H  
ATOM    192 H2''  DA A   6     -74.342  11.084 -13.890  7.00  0.00           H  
ATOM    193 H5''  DA A   6     -74.451   7.935 -17.780  0.00  0.00           H  
ATOM    194  P    DG A   7     -76.708   8.357 -13.930  0.00  0.00           P  
ATOM    195  C5'  DG A   7     -75.482   6.160 -12.930  7.00  0.00           C  
ATOM    196  O5'  DG A   7     -76.465   7.216 -12.760  8.00  0.00           O  
ATOM    197  C4'  DG A   7     -75.156   5.360 -11.630  4.00  0.00           C  
ATOM    198  O4'  DG A   7     -74.026   5.986 -10.980  3.00  0.00           O  
ATOM    199  C3'  DG A   7     -76.280   5.249 -10.660  5.00  0.00           C  
ATOM    200  O3'  DG A   7     -76.236   4.102  -9.850  2.00  0.00           O  
ATOM    201  C2'  DG A   7     -76.124   6.588  -9.910  4.00  0.00           C  
ATOM    202  C1'  DG A   7     -74.571   6.783  -9.870  5.00  0.00           C  
ATOM    203  N1   DG A   7     -70.774  10.017  -8.920  0.00  0.00           N  
ATOM    204  C2   DG A   7     -71.086   8.758  -8.430  9.00  0.00           C  
ATOM    205  N2   DG A   7     -70.205   8.209  -7.630  1.00  0.00           N  
ATOM    206  N3   DG A   7     -72.146   8.006  -8.720  2.00  0.00           N  
ATOM    207  C4   DG A   7     -72.931   8.649  -9.610  1.00  0.00           C  
ATOM    208  C5   DG A   7     -72.774   9.916 -10.140  3.00  0.00           C  
ATOM    209  C6   DG A   7     -71.605  10.608  -9.800  0.00  0.00           C  
ATOM    210  O6   DG A   7     -71.212  11.665 -10.180  6.00  0.00           O  
ATOM    211  N7   DG A   7     -73.804  10.161 -11.030  8.00  0.00           N  
ATOM    212  C8   DG A   7     -74.561   9.102 -10.900  2.00  0.00           C  
ATOM    213  N9   DG A   7     -74.111   8.184 -10.000  6.00  0.00           N  
ATOM    214  OP1  DG A   7     -77.084   7.792 -15.210  5.00  0.00           O  
ATOM    215  OP2  DG A   7     -77.638   9.394 -13.330  2.00  0.00           O1-
ATOM    216  H1   DG A   7     -70.035  10.561  -8.440  7.00  0.00           H  
ATOM    217  H8   DG A   7     -75.483   9.000 -11.420  2.00  0.00           H  
ATOM    218  H1'  DG A   7     -74.176   6.303  -9.040  8.00  0.00           H  
ATOM    219  H2'  DG A   7     -76.552   7.371 -10.490  8.00  0.00           H  
ATOM    220  H21  DG A   7     -69.423   8.767  -7.420  8.00  0.00           H  
ATOM    221  H3'  DG A   7     -77.252   5.198 -11.130  5.00  0.00           H  
ATOM    222  H22  DG A   7     -70.384   7.273  -7.340  1.00  0.00           H  
ATOM    223  H4'  DG A   7     -74.927   4.344 -11.960  4.00  0.00           H  
ATOM    224  H5'  DG A   7     -74.547   6.517 -13.290  7.00  0.00           H  
ATOM    225 H2''  DG A   7     -76.489   6.539  -8.940  8.00  0.00           H  
ATOM    226 H5''  DG A   7     -75.728   5.418 -13.640  2.00  0.00           H  
ATOM    227  P    DG A   8     -77.399   3.803  -8.800  9.00  0.00           P  
ATOM    228  C5'  DG A   8     -75.773   4.559  -6.780  1.00  0.00           C  
ATOM    229  O5'  DG A   8     -77.002   4.739  -7.500  3.00  0.00           O  
ATOM    230  C4'  DG A   8     -75.470   5.653  -5.800  0.00  0.00           C  
ATOM    231  O4'  DG A   8     -74.955   6.817  -6.430  6.00  0.00           O  
ATOM    232  C3'  DG A   8     -76.530   6.117  -4.840  8.00  0.00           C  
ATOM    233  O3'  DG A   8     -75.987   6.381  -3.590  9.00  0.00           O  
ATOM    234  C2'  DG A   8     -77.034   7.389  -5.490  4.00  0.00           C  
ATOM    235  C1'  DG A   8     -75.661   7.941  -5.830  6.00  0.00           C  
ATOM    236  N1   DG A   8     -73.251  12.132  -7.310  4.00  0.00           N  
ATOM    237  C2   DG A   8     -72.974  11.229  -6.320  8.00  0.00           C  
ATOM    238  N2   DG A   8     -72.015  11.391  -5.460  2.00  0.00           N  
ATOM    239  N3   DG A   8     -73.721  10.136  -6.040  3.00  0.00           N  
ATOM    240  C4   DG A   8     -74.773  10.028  -6.900  8.00  0.00           C  
ATOM    241  C5   DG A   8     -75.077  10.797  -7.970  9.00  0.00           C  
ATOM    242  C6   DG A   8     -74.315  12.010  -8.160  9.00  0.00           C  
ATOM    243  O6   DG A   8     -74.300  12.823  -9.060  7.00  0.00           O  
ATOM    244  N7   DG A   8     -76.246  10.273  -8.600  5.00  0.00           N  
ATOM    245  C8   DG A   8     -76.538   9.232  -7.940  0.00  0.00           C  
ATOM    246  N9   DG A   8     -75.635   8.965  -6.900  0.00  0.00           N  
ATOM    247  OP1  DG A   8     -77.240   2.419  -8.420  1.00  0.00           O  
ATOM    248  OP2  DG A   8     -78.726   4.243  -9.310  8.00  0.00           O1-
ATOM    249  H1   DG A   8     -72.717  12.990  -7.370  8.00  0.00           H  
ATOM    250  H8   DG A   8     -77.394   8.596  -8.120  6.00  0.00           H  
ATOM    251  H1'  DG A   8     -75.090   8.254  -4.930  4.00  0.00           H  
ATOM    252  H2'  DG A   8     -77.497   7.197  -6.390  7.00  0.00           H  
ATOM    253  H21  DG A   8     -71.443  12.230  -5.570  2.00  0.00           H  
ATOM    254  H3'  DG A   8     -77.326   5.373  -4.760  1.00  0.00           H  
ATOM    255  H22  DG A   8     -71.741  10.710  -4.800  9.00  0.00           H  
ATOM    256  H4'  DG A   8     -74.606   5.299  -5.250  0.00  0.00           H  
ATOM    257  H5'  DG A   8     -74.957   4.458  -7.490  1.00  0.00           H  
ATOM    258 H2''  DG A   8     -77.689   7.862  -4.780  7.00  0.00           H  
ATOM    259 H5''  DG A   8     -75.825   3.618  -6.250  2.00  0.00           H  
ATOM    260  P    DG A   9     -76.818   5.956  -2.260  1.00  0.00           P  
ATOM    261  C5'  DG A   9     -75.325   7.198  -0.510  4.00  0.00           C  
ATOM    262  O5'  DG A   9     -76.554   7.140  -1.230  0.00  0.00           O  
ATOM    263  C4'  DG A   9     -75.270   8.441   0.350  9.00  0.00           C  
ATOM    264  O4'  DG A   9     -74.953   9.576  -0.400  3.00  0.00           O  
ATOM    265  C3'  DG A   9     -76.546   8.744   1.160  0.00  0.00           C  
ATOM    266  O3'  DG A   9     -76.276   9.433   2.390  3.00  0.00           O  
ATOM    267  C2'  DG A   9     -77.286   9.583   0.180  5.00  0.00           C  
ATOM    268  C1'  DG A   9     -76.152  10.350  -0.470  8.00  0.00           C  
ATOM    269  N1   DG A   9     -75.095  13.535  -4.240  6.00  0.00           N  
ATOM    270  C2   DG A   9     -74.583  13.454  -2.960  1.00  0.00           C  
ATOM    271  N2   DG A   9     -73.857  14.419  -2.450  4.00  0.00           N  
ATOM    272  N3   DG A   9     -74.997  12.576  -2.050  1.00  0.00           N  
ATOM    273  C4   DG A   9     -75.933  11.710  -2.540  2.00  0.00           C  
ATOM    274  C5   DG A   9     -76.413  11.637  -3.790  9.00  0.00           C  
ATOM    275  C6   DG A   9     -75.917  12.578  -4.820  6.00  0.00           C  
ATOM    276  O6   DG A   9     -76.211  12.693  -6.010  4.00  0.00           O  
ATOM    277  N7   DG A   9     -77.183  10.428  -3.980  0.00  0.00           N  
ATOM    278  C8   DG A   9     -77.188   9.874  -2.820  2.00  0.00           C  
ATOM    279  N9   DG A   9     -76.517  10.699  -1.850  6.00  0.00           N  
ATOM    280  OP1  DG A   9     -76.164   4.717  -1.890  3.00  0.00           O  
ATOM    281  OP2  DG A   9     -78.260   5.859  -2.580  7.00  0.00           O1-
ATOM    282  H1   DG A   9     -74.775  14.252  -4.840  6.00  0.00           H  
ATOM    283  H8   DG A   9     -77.604   8.873  -2.670  6.00  0.00           H  
ATOM    284  H1'  DG A   9     -75.980  11.227   0.110  8.00  0.00           H  
ATOM    285  H2'  DG A   9     -77.788   8.864  -0.410  8.00  0.00           H  
ATOM    286  H21  DG A   9     -73.518  15.208  -3.040  4.00  0.00           H  
ATOM    287  H3'  DG A   9     -77.033   7.828   1.420  2.00  0.00           H  
ATOM    288  H22  DG A   9     -73.508  14.295  -1.500  3.00  0.00           H  
ATOM    289  H4'  DG A   9     -74.547   8.160   1.130  3.00  0.00           H  
ATOM    290  H5'  DG A   9     -74.432   7.216  -1.170  9.00  0.00           H  
ATOM    291 H2''  DG A   9     -77.912  10.302   0.700  3.00  0.00           H  
ATOM    292 H5''  DG A   9     -75.167   6.389   0.110  2.00  0.00           H  
ATOM    293  P    DT A  10     -77.324   9.896   3.420  0.00  0.00           P  
ATOM    294  C5'  DT A  10     -76.353  12.320   3.250  1.00  0.00           C  
ATOM    295  O5'  DT A  10     -77.409  11.432   2.930  4.00  0.00           O  
ATOM    296  C4'  DT A  10     -76.574  13.727   2.610  1.00  0.00           C  
ATOM    297  O4'  DT A  10     -76.531  13.599   1.190  7.00  0.00           O  
ATOM    298  C3'  DT A  10     -77.852  14.453   3.110  7.00  0.00           C  
ATOM    299  O3'  DT A  10     -77.395  15.696   3.650  8.00  0.00           O  
ATOM    300  C2'  DT A  10     -78.568  14.533   1.830  4.00  0.00           C  
ATOM    301  C1'  DT A  10     -77.424  14.565   0.810  3.00  0.00           C  
ATOM    302  N1   DT A  10     -77.931  14.397  -0.590  6.00  0.00           N  
ATOM    303  C2   DT A  10     -77.542  15.348  -1.570  8.00  0.00           C  
ATOM    304  O2   DT A  10     -76.738  16.307  -1.420  5.00  0.00           O  
ATOM    305  N3   DT A  10     -78.113  15.223  -2.790  9.00  0.00           N  
ATOM    306  C4   DT A  10     -78.887  14.201  -3.250  9.00  0.00           C  
ATOM    307  O4   DT A  10     -79.315  14.228  -4.390  3.00  0.00           O  
ATOM    308  C5   DT A  10     -79.294  13.202  -2.210  2.00  0.00           C  
ATOM    309  C6   DT A  10     -78.765  13.365  -0.960  6.00  0.00           C  
ATOM    310  C7   DT A  10     -80.201  12.031  -2.450  6.00  0.00           C  
ATOM    311  OP1  DT A  10     -76.644   9.759   4.740  3.00  0.00           O  
ATOM    312  OP2  DT A  10     -78.637   9.284   3.150  6.00  0.00           O1-
ATOM    313  H3   DT A  10     -77.924  16.048  -3.410  2.00  0.00           H  
ATOM    314  H6   DT A  10     -78.970  12.600  -0.230  1.00  0.00           H  
ATOM    315  H1'  DT A  10     -76.920  15.527   0.860  9.00  0.00           H  
ATOM    316  H2'  DT A  10     -79.205  13.631   1.630  5.00  0.00           H  
ATOM    317  H3'  DT A  10     -78.452  13.739   3.790  6.00  0.00           H  
ATOM    318  H4'  DT A  10     -75.824  14.309   2.930  5.00  0.00           H  
ATOM    319  H5'  DT A  10     -75.319  11.992   3.170  0.00  0.00           H  
ATOM    320  H71  DT A  10     -79.675  11.234  -3.050  3.00  0.00           H  
ATOM    321  H72  DT A  10     -80.430  11.597  -1.450  0.00  0.00           H  
ATOM    322  H73  DT A  10     -81.080  12.418  -2.820  5.00  0.00           H  
ATOM    323 H2''  DT A  10     -79.207  15.340   1.780  6.00  0.00           H  
ATOM    324 H5''  DT A  10     -76.448  12.440   4.300  0.00  0.00           H  
ATOM    325  P    DT A  11     -78.454  16.670   4.330  0.00  0.00           P  
ATOM    326  C5'  DT A  11     -78.575  18.525   2.570  7.00  0.00           C  
ATOM    327  O5'  DT A  11     -79.189  17.419   3.130  6.00  0.00           O  
ATOM    328  C4'  DT A  11     -79.411  19.216   1.500  1.00  0.00           C  
ATOM    329  O4'  DT A  11     -79.531  18.348   0.380  4.00  0.00           O  
ATOM    330  C3'  DT A  11     -80.863  19.620   1.890  6.00  0.00           C  
ATOM    331  O3'  DT A  11     -81.125  20.963   1.480  3.00  0.00           O  
ATOM    332  C2'  DT A  11     -81.674  18.556   1.150  8.00  0.00           C  
ATOM    333  C1'  DT A  11     -80.839  18.462  -0.100  2.00  0.00           C  
ATOM    334  N1   DT A  11     -81.290  17.271  -0.950  1.00  0.00           N  
ATOM    335  C2   DT A  11     -81.242  17.358  -2.360  8.00  0.00           C  
ATOM    336  O2   DT A  11     -80.625  18.193  -2.950  5.00  0.00           O  
ATOM    337  N3   DT A  11     -81.674  16.216  -3.010  1.00  0.00           N  
ATOM    338  C4   DT A  11     -82.348  15.135  -2.480  5.00  0.00           C  
ATOM    339  O4   DT A  11     -82.766  14.228  -3.170  5.00  0.00           O  
ATOM    340  C5   DT A  11     -82.171  15.020  -1.020  6.00  0.00           C  
ATOM    341  C6   DT A  11     -81.598  16.070  -0.390  9.00  0.00           C  
ATOM    342  C7   DT A  11     -82.669  13.875  -0.160  4.00  0.00           C  
ATOM    343  OP1  DT A  11     -77.690  17.564   5.180  7.00  0.00           O  
ATOM    344  OP2  DT A  11     -79.479  15.832   5.040  1.00  0.00           O1-
ATOM    345  H3   DT A  11     -81.840  16.356  -3.950  9.00  0.00           H  
ATOM    346  H6   DT A  11     -81.347  15.901   0.680  2.00  0.00           H  
ATOM    347  H1'  DT A  11     -80.886  19.449  -0.550  3.00  0.00           H  
ATOM    348  H2'  DT A  11     -81.607  17.713   1.850  6.00  0.00           H  
ATOM    349  H3'  DT A  11     -80.962  19.535   2.980  8.00  0.00           H  
ATOM    350  H4'  DT A  11     -78.992  20.143   1.110  7.00  0.00           H  
ATOM    351  H5'  DT A  11     -77.669  18.181   2.200  6.00  0.00           H  
ATOM    352  H71  DT A  11     -82.003  13.205   0.360  8.00  0.00           H  
ATOM    353  H72  DT A  11     -83.404  14.321   0.530  8.00  0.00           H  
ATOM    354  H73  DT A  11     -83.287  13.274  -0.770  1.00  0.00           H  
ATOM    355 H2''  DT A  11     -82.697  18.834   0.870  3.00  0.00           H  
ATOM    356 H5''  DT A  11     -78.512  19.245   3.390  7.00  0.00           H  
ATOM    357  P    DA A  12     -82.423  21.783   1.990  8.00  0.00           P  
ATOM    358  C5'  DA A  12     -83.335  21.860  -0.360  3.00  0.00           C  
ATOM    359  O5'  DA A  12     -83.368  21.288   0.890  0.00  0.00           O  
ATOM    360  C4'  DA A  12     -84.118  21.101  -1.420  2.00  0.00           C  
ATOM    361  O4'  DA A  12     -83.761  19.732  -1.440  6.00  0.00           O  
ATOM    362  C3'  DA A  12     -85.660  21.115  -1.300  6.00  0.00           C  
ATOM    363  O3'  DA A  12     -86.314  22.305  -1.820  6.00  0.00           O  
ATOM    364  C2'  DA A  12     -85.993  19.969  -2.200  1.00  0.00           C  
ATOM    365  C1'  DA A  12     -84.881  19.002  -1.940  8.00  0.00           C  
ATOM    366  N1   DA A  12     -86.257  14.214  -1.750  4.00  0.00           N  
ATOM    367  C2   DA A  12     -86.005  15.005  -2.760  3.00  0.00           C  
ATOM    368  N3   DA A  12     -85.498  16.214  -2.640  9.00  0.00           N  
ATOM    369  C4   DA A  12     -85.482  16.646  -1.390  8.00  0.00           C  
ATOM    370  C5   DA A  12     -85.754  15.939  -0.270  6.00  0.00           C  
ATOM    371  C6   DA A  12     -86.148  14.616  -0.480  5.00  0.00           C  
ATOM    372  N6   DA A  12     -86.422  13.698   0.360  3.00  0.00           N  
ATOM    373  N7   DA A  12     -85.587  16.728   0.810  2.00  0.00           N  
ATOM    374  C8   DA A  12     -85.391  17.884   0.310  2.00  0.00           C  
ATOM    375  N9   DA A  12     -85.200  17.931  -1.010  9.00  0.00           N  
ATOM    376  OP1  DA A  12     -82.192  23.216   1.850  7.00  0.00           O  
ATOM    377  OP2  DA A  12     -82.865  21.227   3.280  8.00  0.00           O1-
ATOM    378  H2   DA A  12     -86.112  14.552  -3.760  0.00  0.00           H  
ATOM    379  H8   DA A  12     -85.162  18.699   0.940  7.00  0.00           H  
ATOM    380  H1'  DA A  12     -84.603  18.587  -2.950  2.00  0.00           H  
ATOM    381  H2'  DA A  12     -86.962  19.542  -1.950  3.00  0.00           H  
ATOM    382  H3'  DA A  12     -85.984  20.846  -0.290  1.00  0.00           H  
ATOM    383  H4'  DA A  12     -83.872  21.389  -2.410  4.00  0.00           H  
ATOM    384  H5'  DA A  12     -82.353  21.973  -0.680  8.00  0.00           H  
ATOM    385  H61  DA A  12     -86.775  12.825  -0.040  0.00  0.00           H  
ATOM    386  H62  DA A  12     -86.152  13.740   1.290  2.00  0.00           H  
ATOM    387 H2''  DA A  12     -85.939  20.196  -3.250  7.00  0.00           H  
ATOM    388 H5''  DA A  12     -83.759  22.841  -0.330  1.00  0.00           H  
ATOM    389  P    DG A  13     -87.810  22.674  -1.390  8.00  0.00           P  
ATOM    390  C5'  DG A  13     -87.004  24.656   0.000  1.00  0.00           C  
ATOM    391  O5'  DG A  13     -87.609  24.210  -1.170  2.00  0.00           O  
ATOM    392  C4'  DG A  13     -87.818  25.588   0.900  8.00  0.00           C  
ATOM    393  O4'  DG A  13     -87.968  26.860   0.380  6.00  0.00           O  
ATOM    394  C3'  DG A  13     -89.187  25.103   1.380  1.00  0.00           C  
ATOM    395  O3'  DG A  13     -89.466  25.684   2.650  7.00  0.00           O  
ATOM    396  C2'  DG A  13     -90.014  25.811   0.400  9.00  0.00           C  
ATOM    397  C1'  DG A  13     -89.365  27.152   0.230  9.00  0.00           C  
ATOM    398  N1   DG A  13     -90.481  31.120  -2.730  3.00  0.00           N  
ATOM    399  C2   DG A  13     -90.415  31.028  -1.440  1.00  0.00           C  
ATOM    400  N2   DG A  13     -90.682  32.167  -0.780  6.00  0.00           N  
ATOM    401  N3   DG A  13     -90.122  29.940  -0.650  4.00  0.00           N  
ATOM    402  C4   DG A  13     -89.705  28.977  -1.500  7.00  0.00           C  
ATOM    403  C5   DG A  13     -89.821  28.880  -2.880  2.00  0.00           C  
ATOM    404  C6   DG A  13     -90.193  30.071  -3.600  5.00  0.00           C  
ATOM    405  O6   DG A  13     -90.401  30.351  -4.810  1.00  0.00           O  
ATOM    406  N7   DG A  13     -89.449  27.648  -3.360  9.00  0.00           N  
ATOM    407  C8   DG A  13     -89.290  27.004  -2.300  9.00  0.00           C  
ATOM    408  N9   DG A  13     -89.451  27.682  -1.130  2.00  0.00           N  
ATOM    409  OP1  DG A  13     -88.102  21.996  -0.110  4.00  0.00           O  
ATOM    410  OP2  DG A  13     -88.785  22.565  -2.530  3.00  0.00           O1-
ATOM    411  H1   DG A  13     -91.067  31.830  -3.120  3.00  0.00           H  
ATOM    412  H8   DG A  13     -89.123  25.923  -2.240  8.00  0.00           H  
ATOM    413  H1'  DG A  13     -89.726  27.830   1.070  0.00  0.00           H  
ATOM    414  H2'  DG A  13     -90.133  25.218  -0.540  9.00  0.00           H  
ATOM    415  H21  DG A  13     -90.852  33.053  -1.310  8.00  0.00           H  
ATOM    416  H3'  DG A  13     -89.303  24.038   1.320  1.00  0.00           H  
ATOM    417  H22  DG A  13     -90.538  32.153   0.260  6.00  0.00           H  
ATOM    418  H4'  DG A  13     -87.319  25.559   1.770  4.00  0.00           H  
ATOM    419  H5'  DG A  13     -86.077  25.030  -0.270  4.00  0.00           H  
ATOM    420 H2''  DG A  13     -91.053  25.958   0.740  4.00  0.00           H  
ATOM    421 H5''  DG A  13     -86.696  23.767   0.640  7.00  0.00           H  
ATOM    422  P    DG A  14     -90.842  25.653   3.340  1.00  0.00           P  
ATOM    423  C5'  DG A  14     -92.293  27.648   4.000  0.00  0.00           C  
ATOM    424  O5'  DG A  14     -91.475  27.078   3.050  3.00  0.00           O  
ATOM    425  C4'  DG A  14     -92.999  29.033   3.480  1.00  0.00           C  
ATOM    426  O4'  DG A  14     -93.560  28.932   2.200  2.00  0.00           O  
ATOM    427  C3'  DG A  14     -91.765  29.999   3.290  9.00  0.00           C  
ATOM    428  O3'  DG A  14     -91.479  30.955   4.290  3.00  0.00           O  
ATOM    429  C2'  DG A  14     -92.139  30.761   2.050  0.00  0.00           C  
ATOM    430  C1'  DG A  14     -92.648  29.507   1.300  8.00  0.00           C  
ATOM    431  N1   DG A  14     -93.068  27.424  -3.370  2.00  0.00           N  
ATOM    432  C2   DG A  14     -92.978  26.893  -2.160  0.00  0.00           C  
ATOM    433  N2   DG A  14     -92.811  25.570  -2.090  1.00  0.00           N  
ATOM    434  N3   DG A  14     -92.974  27.497  -0.970  9.00  0.00           N  
ATOM    435  C4   DG A  14     -93.235  28.813  -1.070  7.00  0.00           C  
ATOM    436  C5   DG A  14     -93.440  29.519  -2.220  4.00  0.00           C  
ATOM    437  C6   DG A  14     -93.423  28.774  -3.460  4.00  0.00           C  
ATOM    438  O6   DG A  14     -93.749  29.268  -4.520  3.00  0.00           O  
ATOM    439  N7   DG A  14     -93.853  30.810  -1.900  2.00  0.00           N  
ATOM    440  C8   DG A  14     -93.734  30.918  -0.580  8.00  0.00           C  
ATOM    441  N9   DG A  14     -93.281  29.723  -0.030  1.00  0.00           N  
ATOM    442  OP1  DG A  14     -90.653  25.444   4.820  4.00  0.00           O  
ATOM    443  OP2  DG A  14     -91.635  24.625   2.680  2.00  0.00           O1-
ATOM    444  H1   DG A  14     -93.171  26.858  -4.210  3.00  0.00           H  
ATOM    445  H8   DG A  14     -93.997  31.863  -0.070  5.00  0.00           H  
ATOM    446  H1'  DG A  14     -91.820  28.822   1.110  9.00  0.00           H  
ATOM    447  H2'  DG A  14     -92.921  31.387   2.150  3.00  0.00           H  
ATOM    448  H21  DG A  14     -92.990  25.005  -2.880  0.00  0.00           H  
ATOM    449  H3'  DG A  14     -90.882  29.403   3.150  4.00  0.00           H  
ATOM    450  H22  DG A  14     -92.481  25.191  -1.160  0.00  0.00           H  
ATOM    451  H4'  DG A  14     -93.826  29.343   4.130  7.00  0.00           H  
ATOM    452  H5'  DG A  14     -91.626  27.888   4.790  5.00  0.00           H  
ATOM    453 H2''  DG A  14     -91.314  31.246   1.660  2.00  0.00           H  
ATOM    454 H5''  DG A  14     -93.076  26.926   4.250  7.00  0.00           H  
ATOM    455  P    DG A  15     -92.425  31.450   5.520  3.00  0.00           P  
ATOM    456  C5'  DG A  15     -94.102  32.940   4.120  3.00  0.00           C  
ATOM    457  O5'  DG A  15     -93.792  31.665   4.860  0.00  0.00           O  
ATOM    458  C4'  DG A  15     -95.416  32.975   3.410  2.00  0.00           C  
ATOM    459  O4'  DG A  15     -95.485  32.219   2.220  9.00  0.00           O  
ATOM    460  C3'  DG A  15     -96.446  32.513   4.410  3.00  0.00           C  
ATOM    461  O3'  DG A  15     -97.608  33.274   4.360  9.00  0.00           O  
ATOM    462  C2'  DG A  15     -96.755  31.188   3.760  3.00  0.00           C  
ATOM    463  C1'  DG A  15     -96.696  31.565   2.250  6.00  0.00           C  
ATOM    464  N1   DG A  15     -97.298  30.187  -2.600  5.00  0.00           N  
ATOM    465  C2   DG A  15     -97.493  31.442  -1.980  2.00  0.00           C  
ATOM    466  N2   DG A  15     -97.868  32.423  -2.630  4.00  0.00           N  
ATOM    467  N3   DG A  15     -97.316  31.656  -0.690  8.00  0.00           N  
ATOM    468  C4   DG A  15     -96.986  30.478  -0.010  3.00  0.00           C  
ATOM    469  C5   DG A  15     -96.729  29.235  -0.500  2.00  0.00           C  
ATOM    470  C6   DG A  15     -96.886  29.047  -1.960  0.00  0.00           C  
ATOM    471  O6   DG A  15     -96.658  28.132  -2.740  9.00  0.00           O  
ATOM    472  N7   DG A  15     -96.365  28.377   0.510  0.00  0.00           N  
ATOM    473  C8   DG A  15     -96.435  29.062   1.590  3.00  0.00           C  
ATOM    474  N9   DG A  15     -96.767  30.399   1.340  8.00  0.00           N  
ATOM    475  OP1  DG A  15     -92.001  32.765   6.090  7.00  0.00           O  
ATOM    476  OP2  DG A  15     -92.526  30.325   6.440  2.00  0.00           O1-
ATOM    477  H1   DG A  15     -97.472  30.084  -3.600  2.00  0.00           H  
ATOM    478  H8   DG A  15     -96.166  28.657   2.550  0.00  0.00           H  
ATOM    479  H1'  DG A  15     -97.428  32.278   1.890  0.00  0.00           H  
ATOM    480  H2'  DG A  15     -96.039  30.440   4.020  6.00  0.00           H  
ATOM    481  H21  DG A  15     -97.797  32.300  -3.620  3.00  0.00           H  
ATOM    482  H3'  DG A  15     -96.061  32.320   5.380  6.00  0.00           H  
ATOM    483  H22  DG A  15     -98.373  33.131  -2.130  5.00  0.00           H  
ATOM    484  H4'  DG A  15     -95.600  34.014   3.150  0.00  0.00           H  
ATOM    485  H5'  DG A  15     -93.338  33.112   3.320  6.00  0.00           H  
ATOM    486 H2''  DG A  15     -97.768  30.850   4.130  6.00  0.00           H  
ATOM    487 H5''  DG A  15     -93.924  33.870   4.750  5.00  0.00           H  
ATOM    488  P    DT A  16     -97.848  34.219   5.540  6.00  0.00           P  
ATOM    489  C5'  DT A  16    -100.238  35.255   4.840  4.00  0.00           C  
ATOM    490  O5'  DT A  16     -98.838  35.343   4.840  5.00  0.00           O  
ATOM    491  C4'  DT A  16    -100.950  35.971   3.710  5.00  0.00           C  
ATOM    492  O4'  DT A  16    -100.587  37.406   3.750  1.00  0.00           O  
ATOM    493  C3'  DT A  16    -100.568  35.459   2.270  9.00  0.00           C  
ATOM    494  O3'  DT A  16    -101.684  35.222   1.450  1.00  0.00           O  
ATOM    495  C2'  DT A  16     -99.730  36.605   1.690  7.00  0.00           C  
ATOM    496  C1'  DT A  16    -100.426  37.803   2.420  2.00  0.00           C  
ATOM    497  N1   DT A  16     -99.748  39.136   2.280  2.00  0.00           N  
ATOM    498  C2   DT A  16    -100.539  40.347   2.150  5.00  0.00           C  
ATOM    499  O2   DT A  16    -101.736  40.363   2.180  2.00  0.00           O  
ATOM    500  N3   DT A  16     -99.774  41.483   2.030  3.00  0.00           N  
ATOM    501  C4   DT A  16     -98.383  41.566   2.080  1.00  0.00           C  
ATOM    502  O4   DT A  16     -97.872  42.683   2.140  9.00  0.00           O  
ATOM    503  C5   DT A  16     -97.695  40.319   2.050  9.00  0.00           C  
ATOM    504  C6   DT A  16     -98.378  39.161   2.230  9.00  0.00           C  
ATOM    505  C7   DT A  16     -96.196  40.319   1.970  7.00  0.00           C  
ATOM    506  OP1  DT A  16     -96.581  34.877   5.880  3.00  0.00           O  
ATOM    507  OP2  DT A  16     -98.611  33.565   6.630  5.00  0.00           O1-
ATOM    508  H3   DT A  16    -100.204  42.408   1.980  1.00  0.00           H  
ATOM    509  H6   DT A  16     -97.891  38.267   2.260  9.00  0.00           H  
ATOM    510  H1'  DT A  16    -101.453  37.836   2.020  2.00  0.00           H  
ATOM    511  H2'  DT A  16     -98.727  36.500   2.110  2.00  0.00           H  
ATOM    512  H3'  DT A  16     -99.977  34.611   2.260  0.00  0.00           H  
ATOM    513  H4'  DT A  16    -102.030  35.867   3.730  6.00  0.00           H  
ATOM    514  H5'  DT A  16    -100.600  35.785   5.820  9.00  0.00           H  
ATOM    515  H71  DT A  16     -95.735  39.379   2.080  0.00  0.00           H  
ATOM    516  H72  DT A  16     -95.907  40.926   1.130  5.00  0.00           H  
ATOM    517  H73  DT A  16     -95.800  40.814   2.870  2.00  0.00           H  
ATOM    518 H2''  DT A  16     -99.736  36.711   0.590  2.00  0.00           H  
ATOM    519 H5''  DT A  16    -100.546  34.211   4.840  0.00  0.00           H  
ATOM    520  P    DT A  17    -102.673  34.054   1.720  0.00  0.00           P  
ATOM    521  C5'  DT A  17    -101.333  32.436   0.140  4.00  0.00           C  
ATOM    522  O5'  DT A  17    -102.482  33.277   0.380  7.00  0.00           O  
ATOM    523  C4'  DT A  17    -101.476  31.811  -1.270  8.00  0.00           C  
ATOM    524  O4'  DT A  17    -100.414  30.857  -1.510  4.00  0.00           O  
ATOM    525  C3'  DT A  17    -102.811  31.227  -1.600  5.00  0.00           C  
ATOM    526  O3'  DT A  17    -103.236  31.283  -2.960  4.00  0.00           O  
ATOM    527  C2'  DT A  17    -102.530  29.751  -1.310  1.00  0.00           C  
ATOM    528  C1'  DT A  17    -101.063  29.638  -1.790  2.00  0.00           C  
ATOM    529  N1   DT A  17    -100.400  28.582  -0.960  0.00  0.00           N  
ATOM    530  C2   DT A  17    -100.015  27.399  -1.610  4.00  0.00           C  
ATOM    531  O2   DT A  17    -100.162  27.192  -2.820  1.00  0.00           O  
ATOM    532  N3   DT A  17     -99.332  26.448  -0.860  5.00  0.00           N  
ATOM    533  C4   DT A  17     -99.160  26.506   0.460  5.00  0.00           C  
ATOM    534  O4   DT A  17     -98.634  25.551   1.020  6.00  0.00           O  
ATOM    535  C5   DT A  17     -99.678  27.715   1.110  9.00  0.00           C  
ATOM    536  C6   DT A  17    -100.274  28.681   0.420  6.00  0.00           C  
ATOM    537  C7   DT A  17     -99.424  27.915   2.620  8.00  0.00           C  
ATOM    538  OP1  DT A  17    -104.100  34.548   1.760  5.00  0.00           O  
ATOM    539  OP2  DT A  17    -102.193  33.278   2.830  3.00  0.00           O1-
ATOM    540  H3   DT A  17     -99.056  25.640  -1.350  0.00  0.00           H  
ATOM    541  H6   DT A  17    -100.667  29.531   0.920  6.00  0.00           H  
ATOM    542  H1'  DT A  17    -101.097  29.350  -2.920  3.00  0.00           H  
ATOM    543  H2'  DT A  17    -102.597  29.584  -0.250  1.00  0.00           H  
ATOM    544  H3'  DT A  17    -103.633  31.748  -1.080  1.00  0.00           H  
ATOM    545  H4'  DT A  17    -101.372  32.669  -1.920  6.00  0.00           H  
ATOM    546  H5'  DT A  17    -101.347  31.600   0.880  7.00  0.00           H  
ATOM    547  H71  DT A  17    -100.071  27.245   3.230  6.00  0.00           H  
ATOM    548  H72  DT A  17     -99.617  28.868   3.010  9.00  0.00           H  
ATOM    549  H73  DT A  17     -98.332  27.691   2.930  1.00  0.00           H  
ATOM    550 H2''  DT A  17    -103.148  29.036  -1.930  2.00  0.00           H  
ATOM    551 H5''  DT A  17    -100.359  32.932   0.240  7.00  0.00           H  
ATOM    552  P    DA A  18    -104.640  31.910  -3.330  5.00  0.00           P  
ATOM    553  C5'  DA A  18    -103.807  33.768  -5.030  6.00  0.00           C  
ATOM    554  O5'  DA A  18    -104.388  32.513  -4.800  4.00  0.00           O  
ATOM    555  C4'  DA A  18    -102.978  33.759  -6.290  1.00  0.00           C  
ATOM    556  O4'  DA A  18    -101.861  32.771  -6.180  8.00  0.00           O  
ATOM    557  C3'  DA A  18    -103.661  33.514  -7.580  0.00  0.00           C  
ATOM    558  O3'  DA A  18    -103.429  34.491  -8.580  4.00  0.00           O  
ATOM    559  C2'  DA A  18    -103.323  32.074  -7.820  9.00  0.00           C  
ATOM    560  C1'  DA A  18    -101.912  31.922  -7.350  4.00  0.00           C  
ATOM    561  N1   DA A  18    -101.479  27.037  -8.780  3.00  0.00           N  
ATOM    562  C2   DA A  18    -101.445  28.133  -9.500  4.00  0.00           C  
ATOM    563  N3   DA A  18    -101.449  29.406  -9.040  8.00  0.00           N  
ATOM    564  C4   DA A  18    -101.413  29.397  -7.710  3.00  0.00           C  
ATOM    565  C5   DA A  18    -101.348  28.337  -6.820  7.00  0.00           C  
ATOM    566  C6   DA A  18    -101.380  27.136  -7.480  8.00  0.00           C  
ATOM    567  N6   DA A  18    -101.511  25.896  -6.990  8.00  0.00           N  
ATOM    568  N7   DA A  18    -101.373  28.739  -5.520  6.00  0.00           N  
ATOM    569  C8   DA A  18    -101.579  30.026  -5.580  8.00  0.00           C  
ATOM    570  N9   DA A  18    -101.718  30.483  -6.890  3.00  0.00           N  
ATOM    571  OP1  DA A  18    -104.916  33.079  -2.500  8.00  0.00           O  
ATOM    572  OP2  DA A  18    -105.582  30.783  -3.410  7.00  0.00           O1-
ATOM    573  H2   DA A  18    -101.546  28.059 -10.590  8.00  0.00           H  
ATOM    574  H8   DA A  18    -101.688  30.571  -4.710  1.00  0.00           H  
ATOM    575  H1'  DA A  18    -101.160  32.319  -8.140  3.00  0.00           H  
ATOM    576  H2'  DA A  18    -104.024  31.427  -7.280  7.00  0.00           H  
ATOM    577  H3'  DA A  18    -104.718  33.472  -7.420  6.00  0.00           H  
ATOM    578  H4'  DA A  18    -102.579  34.755  -6.390  9.00  0.00           H  
ATOM    579  H5'  DA A  18    -103.158  33.910  -4.160  5.00  0.00           H  
ATOM    580  H61  DA A  18    -101.411  25.078  -7.570  3.00  0.00           H  
ATOM    581  H62  DA A  18    -101.444  25.788  -5.940  5.00  0.00           H  
ATOM    582 H2''  DA A  18    -103.331  31.850  -8.860  8.00  0.00           H  
ATOM    583 H5''  DA A  18    -104.613  34.549  -5.050  1.00  0.00           H  
ATOM    584  P    DG A  19    -103.966  34.368 -10.100  3.00  0.00           P  
ATOM    585  C5'  DG A  19    -101.651  34.088 -11.380  8.00  0.00           C  
ATOM    586  O5'  DG A  19    -102.773  33.470 -10.850  6.00  0.00           O  
ATOM    587  C4'  DG A  19    -100.853  34.951 -10.350  8.00  0.00           C  
ATOM    588  O4'  DG A  19    -100.466  34.360  -9.100  0.00  0.00           O  
ATOM    589  C3'  DG A  19     -99.580  35.415 -11.080  5.00  0.00           C  
ATOM    590  O3'  DG A  19     -99.617  36.833 -10.800  0.00  0.00           O  
ATOM    591  C2'  DG A  19     -98.411  34.620 -10.370  3.00  0.00           C  
ATOM    592  C1'  DG A  19     -99.108  34.636  -8.930  5.00  0.00           C  
ATOM    593  N1   DG A  19     -97.961  29.827  -7.580  4.00  0.00           N  
ATOM    594  C2   DG A  19     -98.211  30.369  -8.770  8.00  0.00           C  
ATOM    595  N2   DG A  19     -98.261  29.573  -9.770  2.00  0.00           N  
ATOM    596  N3   DG A  19     -98.376  31.613  -9.080  0.00  0.00           N  
ATOM    597  C4   DG A  19     -98.364  32.357  -7.960  0.00  0.00           C  
ATOM    598  C5   DG A  19     -98.212  31.949  -6.610  7.00  0.00           C  
ATOM    599  C6   DG A  19     -98.018  30.534  -6.380  5.00  0.00           C  
ATOM    600  O6   DG A  19     -97.874  29.945  -5.350  0.00  0.00           O  
ATOM    601  N7   DG A  19     -98.192  33.018  -5.770  2.00  0.00           N  
ATOM    602  C8   DG A  19     -98.381  34.070  -6.530  0.00  0.00           C  
ATOM    603  N9   DG A  19     -98.542  33.742  -7.880  7.00  0.00           N  
ATOM    604  OP1  DG A  19    -103.915  35.716 -10.700  0.00  0.00           O  
ATOM    605  OP2  DG A  19    -105.273  33.625  -9.960  6.00  0.00           O1-
ATOM    606  H1   DG A  19     -97.719  28.896  -7.540  1.00  0.00           H  
ATOM    607  H8   DG A  19     -98.340  35.071  -6.170  8.00  0.00           H  
ATOM    608  H1'  DG A  19     -99.023  35.719  -8.660  2.00  0.00           H  
ATOM    609  H2'  DG A  19     -98.409  33.625 -10.810  3.00  0.00           H  
ATOM    610  H21  DG A  19     -98.198  28.526  -9.600  4.00  0.00           H  
ATOM    611  H3'  DG A  19     -99.637  35.216 -12.160  3.00  0.00           H  
ATOM    612  H22  DG A  19     -98.579  29.913 -10.650  9.00  0.00           H  
ATOM    613  H4'  DG A  19    -101.362  35.855 -10.090  9.00  0.00           H  
ATOM    614  H5'  DG A  19    -101.988  34.714 -12.170  3.00  0.00           H  
ATOM    615 H2''  DG A  19     -97.413  35.101 -10.400  2.00  0.00           H  
ATOM    616 H5''  DG A  19    -100.975  33.377 -11.870  7.00  0.00           H  
ATOM    617  P    DG A  20     -98.529  37.963 -11.080  1.00  0.00           P  
ATOM    618  C5'  DG A  20     -98.098  38.480  -8.480  1.00  0.00           C  
ATOM    619  O5'  DG A  20     -97.734  37.818  -9.710  0.00  0.00           O  
ATOM    620  C4'  DG A  20     -97.011  38.283  -7.440  4.00  0.00           C  
ATOM    621  O4'  DG A  20     -96.939  36.930  -7.030  9.00  0.00           O  
ATOM    622  C3'  DG A  20     -95.537  38.544  -7.900  6.00  0.00           C  
ATOM    623  O3'  DG A  20     -95.191  39.906  -7.810  9.00  0.00           O  
ATOM    624  C2'  DG A  20     -94.854  37.818  -6.830  5.00  0.00           C  
ATOM    625  C1'  DG A  20     -95.639  36.517  -6.690  9.00  0.00           C  
ATOM    626  N1   DG A  20     -94.506  31.571  -7.080  4.00  0.00           N  
ATOM    627  C2   DG A  20     -94.721  32.339  -5.960  2.00  0.00           C  
ATOM    628  N2   DG A  20     -94.601  31.790  -4.770  7.00  0.00           N  
ATOM    629  N3   DG A  20     -94.919  33.666  -5.960  5.00  0.00           N  
ATOM    630  C4   DG A  20     -94.963  34.169  -7.260  9.00  0.00           C  
ATOM    631  C5   DG A  20     -94.797  33.507  -8.430  9.00  0.00           C  
ATOM    632  C6   DG A  20     -94.495  32.096  -8.330  0.00  0.00           C  
ATOM    633  O6   DG A  20     -94.236  31.279  -9.160  4.00  0.00           O  
ATOM    634  N7   DG A  20     -94.741  34.414  -9.580  8.00  0.00           N  
ATOM    635  C8   DG A  20     -95.225  35.556  -9.020  1.00  0.00           C  
ATOM    636  N9   DG A  20     -95.240  35.496  -7.610  8.00  0.00           N  
ATOM    637  OP1  DG A  20     -99.226  39.247 -11.100  1.00  0.00           O  
ATOM    638  OP2  DG A  20     -97.693  37.595 -12.250  6.00  0.00           O1-
ATOM    639  H1   DG A  20     -94.392  30.614  -6.940  2.00  0.00           H  
ATOM    640  H8   DG A  20     -95.232  36.426  -9.590  1.00  0.00           H  
ATOM    641  H1'  DG A  20     -95.578  36.130  -5.680  5.00  0.00           H  
ATOM    642  H2'  DG A  20     -93.844  37.617  -7.000  2.00  0.00           H  
ATOM    643  H21  DG A  20     -94.525  30.810  -4.840  5.00  0.00           H  
ATOM    644  H3'  DG A  20     -95.371  38.000  -8.840  4.00  0.00           H  
ATOM    645  H22  DG A  20     -94.468  32.318  -3.940  3.00  0.00           H  
ATOM    646  H4'  DG A  20     -97.149  38.833  -6.560  6.00  0.00           H  
ATOM    647  H5'  DG A  20     -99.049  38.095  -8.000  9.00  0.00           H  
ATOM    648 H2''  DG A  20     -95.079  38.350  -5.910  6.00  0.00           H  
ATOM    649 H5''  DG A  20     -98.213  39.607  -8.650  5.00  0.00           H  
ATOM    650  P    DG A  21     -94.266  40.598  -8.950  5.00  0.00           P  
ATOM    651  C5'  DG A  21     -91.738  40.116  -9.530  8.00  0.00           C  
ATOM    652  O5'  DG A  21     -92.948  39.676  -8.970  6.00  0.00           O  
ATOM    653  C4'  DG A  21     -90.578  39.109  -9.420  7.00  0.00           C  
ATOM    654  O4'  DG A  21     -90.426  38.471  -8.110  2.00  0.00           O  
ATOM    655  C3'  DG A  21     -90.779  37.947 -10.430  6.00  0.00           C  
ATOM    656  O3'  DG A  21     -89.476  37.618 -10.970  7.00  0.00           O  
ATOM    657  C2'  DG A  21     -91.251  36.880  -9.460  3.00  0.00           C  
ATOM    658  C1'  DG A  21     -90.347  37.126  -8.230  1.00  0.00           C  
ATOM    659  N1   DG A  21     -91.483  32.772  -5.770  2.00  0.00           N  
ATOM    660  C2   DG A  21     -91.354  32.975  -7.060  3.00  0.00           C  
ATOM    661  N2   DG A  21     -91.282  31.844  -7.840  4.00  0.00           N  
ATOM    662  N3   DG A  21     -91.056  34.096  -7.600  8.00  0.00           N  
ATOM    663  C4   DG A  21     -91.065  35.198  -6.720  6.00  0.00           C  
ATOM    664  C5   DG A  21     -91.087  35.089  -5.360  3.00  0.00           C  
ATOM    665  C6   DG A  21     -91.425  33.773  -4.830  5.00  0.00           C  
ATOM    666  O6   DG A  21     -91.853  33.430  -3.700  8.00  0.00           O  
ATOM    667  N7   DG A  21     -90.979  36.349  -4.660  9.00  0.00           N  
ATOM    668  C8   DG A  21     -90.759  37.119  -5.690  2.00  0.00           C  
ATOM    669  N9   DG A  21     -90.785  36.552  -6.970  2.00  0.00           N  
ATOM    670  OP1  DG A  21     -93.978  41.909  -8.400  5.00  0.00           O  
ATOM    671  OP2  DG A  21     -95.033  40.434 -10.270  5.00  0.00           O1-
ATOM    672  H1   DG A  21     -91.742  31.849  -5.370  5.00  0.00           H  
ATOM    673  H8   DG A  21     -90.383  38.091  -5.500  2.00  0.00           H  
ATOM    674  H1'  DG A  21     -89.342  36.899  -8.370  4.00  0.00           H  
ATOM    675  H2'  DG A  21     -92.325  37.135  -9.240  3.00  0.00           H  
ATOM    676  H21  DG A  21     -91.454  30.928  -7.490  4.00  0.00           H  
ATOM    677  H3'  DG A  21     -91.498  38.283 -11.160  8.00  0.00           H  
ATOM    678  H22  DG A  21     -91.186  32.028  -8.890  8.00  0.00           H  
ATOM    679  H4'  DG A  21     -89.692  39.650  -9.730  3.00  0.00           H  
ATOM    680  H5'  DG A  21     -91.450  41.014  -8.920  8.00  0.00           H  
ATOM    681 H2''  DG A  21     -91.139  35.824  -9.720  3.00  0.00           H  
ATOM    682 H5''  DG A  21     -91.789  40.410 -10.570  2.00  0.00           H  
ATOM    683  P    DT A  22     -89.201  36.461 -12.000  1.00  0.00           P  
ATOM    684  C5'  DT A  22     -88.081  34.888 -10.240  0.00  0.00           C  
ATOM    685  O5'  DT A  22     -89.056  35.021 -11.220  1.00  0.00           O  
ATOM    686  C4'  DT A  22     -87.047  33.845 -10.670  2.00  0.00           C  
ATOM    687  O4'  DT A  22     -86.063  33.702  -9.680  3.00  0.00           O  
ATOM    688  C3'  DT A  22     -87.697  32.481 -10.860  0.00  0.00           C  
ATOM    689  O3'  DT A  22     -87.067  31.772 -11.870  7.00  0.00           O  
ATOM    690  C2'  DT A  22     -87.589  31.849  -9.500  5.00  0.00           C  
ATOM    691  C1'  DT A  22     -86.203  32.423  -9.070  4.00  0.00           C  
ATOM    692  N1   DT A  22     -85.999  32.525  -7.630  6.00  0.00           N  
ATOM    693  C2   DT A  22     -84.928  31.854  -7.050  0.00  0.00           C  
ATOM    694  O2   DT A  22     -84.110  31.284  -7.730  2.00  0.00           O  
ATOM    695  N3   DT A  22     -84.631  32.060  -5.700  8.00  0.00           N  
ATOM    696  C4   DT A  22     -85.439  32.807  -4.870  4.00  0.00           C  
ATOM    697  O4   DT A  22     -85.141  32.786  -3.660  7.00  0.00           O  
ATOM    698  C5   DT A  22     -86.637  33.396  -5.480  4.00  0.00           C  
ATOM    699  C6   DT A  22     -86.834  33.250  -6.820  8.00  0.00           C  
ATOM    700  C7   DT A  22     -87.588  34.154  -4.600  6.00  0.00           C  
ATOM    701  OP1  DT A  22     -87.845  36.775 -12.500  2.00  0.00           O  
ATOM    702  OP2  DT A  22     -90.374  36.391 -12.920  0.00  0.00           O1-
ATOM    703  H3   DT A  22     -83.841  31.601  -5.330  7.00  0.00           H  
ATOM    704  H6   DT A  22     -87.697  33.623  -7.370  9.00  0.00           H  
ATOM    705  H1'  DT A  22     -85.482  31.809  -9.600  7.00  0.00           H  
ATOM    706  H2'  DT A  22     -88.347  32.203  -8.850  1.00  0.00           H  
ATOM    707  H3'  DT A  22     -88.723  32.511 -11.260  2.00  0.00           H  
ATOM    708  H4'  DT A  22     -86.626  34.189 -11.610  3.00  0.00           H  
ATOM    709  H5'  DT A  22     -88.530  34.538  -9.300  1.00  0.00           H  
ATOM    710  H71  DT A  22     -88.384  34.564  -5.140  4.00  0.00           H  
ATOM    711  H72  DT A  22     -88.075  33.476  -3.840  8.00  0.00           H  
ATOM    712  H73  DT A  22     -86.997  34.806  -4.040  7.00  0.00           H  
ATOM    713 H2''  DT A  22     -87.606  30.719  -9.460  9.00  0.00           H  
ATOM    714 H5''  DT A  22     -87.602  35.892 -10.070  5.00  0.00           H  
ATOM    715  P    DT A  23     -87.483  30.236 -12.240  3.00  0.00           P  
ATOM    716  C5'  DT A  23     -84.967  29.329 -12.020  4.00  0.00           C  
ATOM    717  O5'  DT A  23     -86.350  29.239 -11.530  8.00  0.00           O  
ATOM    718  C4'  DT A  23     -84.086  28.340 -11.320  1.00  0.00           C  
ATOM    719  O4'  DT A  23     -84.053  28.666  -9.970  7.00  0.00           O  
ATOM    720  C3'  DT A  23     -84.487  26.892 -11.280  4.00  0.00           C  
ATOM    721  O3'  DT A  23     -83.300  26.153 -11.470  3.00  0.00           O  
ATOM    722  C2'  DT A  23     -84.935  26.638  -9.870  6.00  0.00           C  
ATOM    723  C1'  DT A  23     -84.060  27.583  -9.090  5.00  0.00           C  
ATOM    724  N1   DT A  23     -84.632  27.888  -7.720  7.00  0.00           N  
ATOM    725  C2   DT A  23     -84.122  27.088  -6.700  9.00  0.00           C  
ATOM    726  O2   DT A  23     -83.240  26.199  -6.770  6.00  0.00           O  
ATOM    727  N3   DT A  23     -84.636  27.380  -5.490  9.00  0.00           N  
ATOM    728  C4   DT A  23     -85.588  28.299  -5.150  7.00  0.00           C  
ATOM    729  O4   DT A  23     -85.842  28.636  -3.960  3.00  0.00           O  
ATOM    730  C5   DT A  23     -86.244  28.944  -6.340  0.00  0.00           C  
ATOM    731  C6   DT A  23     -85.764  28.642  -7.610  2.00  0.00           C  
ATOM    732  C7   DT A  23     -87.428  29.813  -6.100  0.00  0.00           C  
ATOM    733  OP1  DT A  23     -87.359  29.920 -13.710  3.00  0.00           O  
ATOM    734  OP2  DT A  23     -88.803  29.942 -11.650  8.00  0.00           O1-
ATOM    735  H3   DT A  23     -84.149  26.997  -4.730  6.00  0.00           H  
ATOM    736  H6   DT A  23     -86.194  29.114  -8.470  6.00  0.00           H  
ATOM    737  H1'  DT A  23     -83.001  27.215  -8.960  1.00  0.00           H  
ATOM    738  H2'  DT A  23     -85.932  26.820  -9.710  9.00  0.00           H  
ATOM    739  H3'  DT A  23     -85.222  26.571 -12.050  0.00  0.00           H  
ATOM    740  H4'  DT A  23     -83.098  28.379 -11.780  6.00  0.00           H  
ATOM    741  H5'  DT A  23     -84.625  30.355 -11.910  0.00  0.00           H  
ATOM    742  H71  DT A  23     -87.242  30.456  -5.180  2.00  0.00           H  
ATOM    743  H72  DT A  23     -87.737  30.422  -6.920  2.00  0.00           H  
ATOM    744  H73  DT A  23     -88.288  29.268  -5.770  7.00  0.00           H  
ATOM    745 H2''  DT A  23     -84.683  25.559  -9.690  9.00  0.00           H  
ATOM    746 H5''  DT A  23     -84.919  29.004 -12.970  0.00  0.00           H  
ATOM    747  P    DA A  24     -83.096  25.144 -12.570  5.00  0.00           P  
ATOM    748  C5'  DA A  24     -85.399  23.936 -13.070  4.00  0.00           C  
ATOM    749  O5'  DA A  24     -84.110  24.009 -12.390  9.00  0.00           O  
ATOM    750  C4'  DA A  24     -86.203  22.741 -12.610  8.00  0.00           C  
ATOM    751  O4'  DA A  24     -86.343  22.998 -11.230  5.00  0.00           O  
ATOM    752  C3'  DA A  24     -87.558  22.762 -13.240  1.00  0.00           C  
ATOM    753  O3'  DA A  24     -87.880  21.432 -13.600  2.00  0.00           O  
ATOM    754  C2'  DA A  24     -88.458  23.229 -12.080  3.00  0.00           C  
ATOM    755  C1'  DA A  24     -87.674  22.743 -10.840  4.00  0.00           C  
ATOM    756  N1   DA A  24     -88.691  27.201  -8.150  0.00  0.00           N  
ATOM    757  C2   DA A  24     -88.638  26.955  -9.490  0.00  0.00           C  
ATOM    758  N3   DA A  24     -88.489  25.778 -10.130  5.00  0.00           N  
ATOM    759  C4   DA A  24     -88.367  24.750  -9.250  4.00  0.00           C  
ATOM    760  C5   DA A  24     -88.368  24.825  -7.890  9.00  0.00           C  
ATOM    761  C6   DA A  24     -88.465  26.134  -7.370  7.00  0.00           C  
ATOM    762  N6   DA A  24     -88.485  26.473  -6.070  6.00  0.00           N  
ATOM    763  N7   DA A  24     -88.194  23.565  -7.280  0.00  0.00           N  
ATOM    764  C8   DA A  24     -88.159  22.766  -8.320  5.00  0.00           C  
ATOM    765  N9   DA A  24     -88.131  23.378  -9.550  3.00  0.00           N  
ATOM    766  OP1  DA A  24     -81.760  24.535 -12.460  0.00  0.00           O  
ATOM    767  OP2  DA A  24     -83.298  25.933 -13.780  3.00  0.00           O1-
ATOM    768  H2   DA A  24     -88.820  27.810 -10.140  4.00  0.00           H  
ATOM    769  H8   DA A  24     -88.222  21.616  -8.250  9.00  0.00           H  
ATOM    770  H1'  DA A  24     -87.799  21.692 -10.790  3.00  0.00           H  
ATOM    771  H2'  DA A  24     -88.328  24.319 -12.050  4.00  0.00           H  
ATOM    772  H3'  DA A  24     -87.703  23.503 -14.100  1.00  0.00           H  
ATOM    773  H4'  DA A  24     -85.701  21.804 -12.850  1.00  0.00           H  
ATOM    774  H5'  DA A  24     -85.200  23.862 -14.150  3.00  0.00           H  
ATOM    775  H61  DA A  24     -88.590  27.422  -5.830  2.00  0.00           H  
ATOM    776  H62  DA A  24     -88.228  25.770  -5.420  6.00  0.00           H  
ATOM    777 H2''  DA A  24     -89.487  23.057 -12.150  0.00  0.00           H  
ATOM    778 H5''  DA A  24     -85.980  24.817 -12.860  9.00  0.00           H  
ATOM    779  P    DG A  25     -89.292  20.894 -14.170  0.00  0.00           P  
ATOM    780  C5'  DG A  25     -89.986  19.792 -11.990  6.00  0.00           C  
ATOM    781  O5'  DG A  25     -90.313  20.731 -12.990  8.00  0.00           O  
ATOM    782  C4'  DG A  25     -90.824  19.915 -10.700  7.00  0.00           C  
ATOM    783  O4'  DG A  25     -90.739  21.183 -10.220  6.00  0.00           O  
ATOM    784  C3'  DG A  25     -92.321  19.590 -10.580  5.00  0.00           C  
ATOM    785  O3'  DG A  25     -92.603  19.299  -9.230  8.00  0.00           O  
ATOM    786  C2'  DG A  25     -92.886  20.938 -11.090  2.00  0.00           C  
ATOM    787  C1'  DG A  25     -92.000  21.835 -10.260  1.00  0.00           C  
ATOM    788  N1   DG A  25     -91.858  26.781  -8.970  4.00  0.00           N  
ATOM    789  C2   DG A  25     -91.733  25.714  -8.180  7.00  0.00           C  
ATOM    790  N2   DG A  25     -91.911  26.012  -6.970  7.00  0.00           N  
ATOM    791  N3   DG A  25     -91.697  24.448  -8.590  7.00  0.00           N  
ATOM    792  C4   DG A  25     -91.827  24.334  -9.990  4.00  0.00           C  
ATOM    793  C5   DG A  25     -91.959  25.370 -10.890  7.00  0.00           C  
ATOM    794  C6   DG A  25     -91.924  26.682 -10.360  2.00  0.00           C  
ATOM    795  O6   DG A  25     -91.877  27.736 -11.020  5.00  0.00           O  
ATOM    796  N7   DG A  25     -92.095  24.904 -12.200  2.00  0.00           N  
ATOM    797  C8   DG A  25     -91.967  23.597 -12.130  0.00  0.00           C  
ATOM    798  N9   DG A  25     -91.928  23.209 -10.770  5.00  0.00           N  
ATOM    799  OP1  DG A  25     -89.144  19.546 -14.700  1.00  0.00           O  
ATOM    800  OP2  DG A  25     -89.836  21.956 -14.990  5.00  0.00           O1-
ATOM    801  H1   DG A  25     -91.732  27.755  -8.660  8.00  0.00           H  
ATOM    802  H8   DG A  25     -91.973  22.920 -12.960  7.00  0.00           H  
ATOM    803  H1'  DG A  25     -92.342  21.919  -9.220  9.00  0.00           H  
ATOM    804  H2'  DG A  25     -92.748  21.008 -12.220  8.00  0.00           H  
ATOM    805  H21  DG A  25     -92.278  26.936  -6.780  7.00  0.00           H  
ATOM    806  H3'  DG A  25     -92.623  18.781 -11.260  7.00  0.00           H  
ATOM    807  H22  DG A  25     -91.949  25.324  -6.280  1.00  0.00           H  
ATOM    808  H4'  DG A  25     -90.339  19.281  -9.980  1.00  0.00           H  
ATOM    809  H5'  DG A  25     -89.038  20.053 -11.650  6.00  0.00           H  
ATOM    810 H2''  DG A  25     -93.888  21.069 -10.700  6.00  0.00           H  
ATOM    811 H5''  DG A  25     -89.963  18.760 -12.320  2.00  0.00           H  
ATOM    812  P    DG A  26     -93.747  18.309  -8.910  6.00  0.00           P  
ATOM    813  C5'  DG A  26     -92.366  17.237  -6.940  0.00  0.00           C  
ATOM    814  O5'  DG A  26     -93.515  18.024  -7.400  7.00  0.00           O  
ATOM    815  C4'  DG A  26     -92.143  17.393  -5.410  0.00  0.00           C  
ATOM    816  O4'  DG A  26     -91.827  18.745  -5.000  7.00  0.00           O  
ATOM    817  C3'  DG A  26     -93.400  16.979  -4.580  6.00  0.00           C  
ATOM    818  O3'  DG A  26     -92.966  16.317  -3.440  8.00  0.00           O  
ATOM    819  C2'  DG A  26     -94.007  18.333  -4.370  2.00  0.00           C  
ATOM    820  C1'  DG A  26     -92.738  19.140  -4.000  9.00  0.00           C  
ATOM    821  N1   DG A  26     -94.274  23.451  -6.440  4.00  0.00           N  
ATOM    822  C2   DG A  26     -94.463  22.145  -6.800  6.00  0.00           C  
ATOM    823  N2   DG A  26     -95.031  21.850  -7.920  4.00  0.00           N  
ATOM    824  N3   DG A  26     -93.983  21.150  -6.020  7.00  0.00           N  
ATOM    825  C4   DG A  26     -93.450  21.473  -4.830  1.00  0.00           C  
ATOM    826  C5   DG A  26     -93.327  22.777  -4.370  2.00  0.00           C  
ATOM    827  C6   DG A  26     -93.788  23.828  -5.260  6.00  0.00           C  
ATOM    828  O6   DG A  26     -93.664  25.013  -5.080  9.00  0.00           O  
ATOM    829  N7   DG A  26     -92.605  22.780  -3.200  2.00  0.00           N  
ATOM    830  C8   DG A  26     -92.362  21.500  -2.930  3.00  0.00           C  
ATOM    831  N9   DG A  26     -92.872  20.636  -3.920  5.00  0.00           N  
ATOM    832  OP1  DG A  26     -93.458  17.044  -9.630  9.00  0.00           O  
ATOM    833  OP2  DG A  26     -95.071  18.899  -9.120  2.00  0.00           O1-
ATOM    834  H1   DG A  26     -94.627  24.279  -6.950  5.00  0.00           H  
ATOM    835  H8   DG A  26     -91.821  21.219  -2.040  2.00  0.00           H  
ATOM    836  H1'  DG A  26     -92.419  18.726  -3.030  2.00  0.00           H  
ATOM    837  H2'  DG A  26     -94.504  18.757  -5.180  3.00  0.00           H  
ATOM    838  H21  DG A  26     -95.291  22.534  -8.600  4.00  0.00           H  
ATOM    839  H3'  DG A  26     -94.052  16.389  -5.200  3.00  0.00           H  
ATOM    840  H22  DG A  26     -95.189  20.880  -8.060  7.00  0.00           H  
ATOM    841  H4'  DG A  26     -91.333  16.763  -5.120  4.00  0.00           H  
ATOM    842  H5'  DG A  26     -91.473  17.491  -7.530  9.00  0.00           H  
ATOM    843 H2''  DG A  26     -94.672  18.483  -3.520  6.00  0.00           H  
ATOM    844 H5''  DG A  26     -92.519  16.173  -7.120  7.00  0.00           H  
ATOM    845  P    DG A  27     -93.996  15.886  -2.260  1.00  0.00           P  
ATOM    846  C5'  DG A  27     -93.778  17.646  -0.450  6.00  0.00           C  
ATOM    847  O5'  DG A  27     -94.514  17.077  -1.490  3.00  0.00           O  
ATOM    848  C4'  DG A  27     -94.445  18.965   0.090  8.00  0.00           C  
ATOM    849  O4'  DG A  27     -94.689  19.979  -0.920  9.00  0.00           O  
ATOM    850  C3'  DG A  27     -95.880  18.750   0.590  6.00  0.00           C  
ATOM    851  O3'  DG A  27     -96.088  19.541   1.720  5.00  0.00           O  
ATOM    852  C2'  DG A  27     -96.704  19.278  -0.530  2.00  0.00           C  
ATOM    853  C1'  DG A  27     -95.960  20.510  -0.900  0.00  0.00           C  
ATOM    854  N1   DG A  27     -96.445  24.883  -3.230  6.00  0.00           N  
ATOM    855  C2   DG A  27     -96.151  24.567  -2.000  5.00  0.00           C  
ATOM    856  N2   DG A  27     -96.355  25.475  -1.100  0.00  0.00           N  
ATOM    857  N3   DG A  27     -96.039  23.298  -1.530  5.00  0.00           N  
ATOM    858  C4   DG A  27     -96.318  22.381  -2.440  4.00  0.00           C  
ATOM    859  C5   DG A  27     -96.801  22.600  -3.700  0.00  0.00           C  
ATOM    860  C6   DG A  27     -96.888  23.950  -4.160  9.00  0.00           C  
ATOM    861  O6   DG A  27     -97.319  24.272  -5.280  0.00  0.00           O  
ATOM    862  N7   DG A  27     -97.221  21.347  -4.220  5.00  0.00           N  
ATOM    863  C8   DG A  27     -96.784  20.462  -3.350  5.00  0.00           C  
ATOM    864  N9   DG A  27     -96.293  21.060  -2.260  0.00  0.00           N  
ATOM    865  OP1  DG A  27     -93.202  15.108  -1.300  9.00  0.00           O  
ATOM    866  OP2  DG A  27     -95.128  15.191  -2.870  5.00  0.00           O1-
ATOM    867  H1   DG A  27     -96.579  25.878  -3.520  8.00  0.00           H  
ATOM    868  H8   DG A  27     -96.830  19.368  -3.540  4.00  0.00           H  
ATOM    869  H1'  DG A  27     -96.088  21.127  -0.070  3.00  0.00           H  
ATOM    870  H2'  DG A  27     -96.768  18.583  -1.350  5.00  0.00           H  
ATOM    871  H21  DG A  27     -96.436  26.415  -1.450  2.00  0.00           H  
ATOM    872  H3'  DG A  27     -95.980  17.681   0.740  7.00  0.00           H  
ATOM    873  H22  DG A  27     -96.218  25.257  -0.080  8.00  0.00           H  
ATOM    874  H4'  DG A  27     -93.876  19.398   0.930  8.00  0.00           H  
ATOM    875  H5'  DG A  27     -92.779  17.890  -0.760  7.00  0.00           H  
ATOM    876 H2''  DG A  27     -97.727  19.514  -0.230  4.00  0.00           H  
ATOM    877 H5''  DG A  27     -93.629  16.982   0.310  3.00  0.00           H  
ATOM    878  P    DT A  28     -96.060  18.961   3.170  5.00  0.00           P  
ATOM    879  C5'  DT A  28     -98.687  18.813   3.300  0.00  0.00           C  
ATOM    880  O5'  DT A  28     -97.431  18.211   3.470  8.00  0.00           O  
ATOM    881  C4'  DT A  28     -99.849  17.768   3.440  6.00  0.00           C  
ATOM    882  O4'  DT A  28    -101.106  18.381   3.480  8.00  0.00           O  
ATOM    883  C3'  DT A  28     -99.940  16.752   2.320  2.00  0.00           C  
ATOM    884  O3'  DT A  28    -100.630  15.631   2.840  5.00  0.00           O  
ATOM    885  C2'  DT A  28    -100.733  17.381   1.270  3.00  0.00           C  
ATOM    886  C1'  DT A  28    -101.697  18.163   2.200  7.00  0.00           C  
ATOM    887  N1   DT A  28    -102.076  19.463   1.560  2.00  0.00           N  
ATOM    888  C2   DT A  28    -102.996  19.369   0.540  3.00  0.00           C  
ATOM    889  O2   DT A  28    -103.431  18.317  -0.000  3.00  0.00           O  
ATOM    890  N3   DT A  28    -103.351  20.545  -0.120  7.00  0.00           N  
ATOM    891  C4   DT A  28    -102.871  21.809   0.150  2.00  0.00           C  
ATOM    892  O4   DT A  28    -103.148  22.787  -0.540  1.00  0.00           O  
ATOM    893  C5   DT A  28    -101.928  21.854   1.280  2.00  0.00           C  
ATOM    894  C6   DT A  28    -101.556  20.719   1.890  4.00  0.00           C  
ATOM    895  C7   DT A  28    -101.373  23.156   1.910  4.00  0.00           C  
ATOM    896  OP1  DT A  28     -95.886  20.110   4.060  8.00  0.00           O  
ATOM    897  OP2  DT A  28     -95.057  17.854   3.190  2.00  0.00           O1-
ATOM    898  H3   DT A  28    -104.175  20.415  -0.670  5.00  0.00           H  
ATOM    899  H6   DT A  28    -100.798  20.695   2.740  9.00  0.00           H  
ATOM    900  H1'  DT A  28    -102.559  17.584   2.360  6.00  0.00           H  
ATOM    901  H2'  DT A  28    -100.106  17.970   0.610  2.00  0.00           H  
ATOM    902  H3'  DT A  28     -98.968  16.411   2.000  2.00  0.00           H  
ATOM    903  H4'  DT A  28     -99.614  17.252   4.390  3.00  0.00           H  
ATOM    904  H5'  DT A  28     -98.840  19.281   2.280  8.00  0.00           H  
ATOM    905  H71  DT A  28    -102.110  23.890   2.270  5.00  0.00           H  
ATOM    906  H72  DT A  28    -100.704  22.939   2.760  1.00  0.00           H  
ATOM    907  H73  DT A  28    -100.791  23.678   1.100  5.00  0.00           H  
ATOM    908 H2''  DT A  28    -101.311  16.709   0.680  2.00  0.00           H  
ATOM    909 H5''  DT A  28     -98.920  19.503   4.140  9.00  0.00           H  
ATOM    910  P    DT A  29    -100.185  14.107   2.430  0.00  0.00           P  
ATOM    911  C5'  DT A  29    -101.638  13.242   0.400  7.00  0.00           C  
ATOM    912  O5'  DT A  29    -100.493  13.920   0.880  5.00  0.00           O  
ATOM    913  C4'  DT A  29    -101.915  13.415  -1.120  3.00  0.00           C  
ATOM    914  O4'  DT A  29    -103.272  13.014  -1.290  1.00  0.00           O  
ATOM    915  C3'  DT A  29    -101.778  14.868  -1.570  2.00  0.00           C  
ATOM    916  O3'  DT A  29    -101.630  14.771  -2.970  7.00  0.00           O  
ATOM    917  C2'  DT A  29    -103.178  15.376  -1.240  7.00  0.00           C  
ATOM    918  C1'  DT A  29    -104.054  14.135  -1.560  2.00  0.00           C  
ATOM    919  N1   DT A  29    -105.364  14.177  -0.850  5.00  0.00           N  
ATOM    920  C2   DT A  29    -106.358  15.020  -1.260  7.00  0.00           C  
ATOM    921  O2   DT A  29    -106.387  15.690  -2.300  0.00  0.00           O  
ATOM    922  N3   DT A  29    -107.480  15.156  -0.430  6.00  0.00           N  
ATOM    923  C4   DT A  29    -107.770  14.385   0.620  6.00  0.00           C  
ATOM    924  O4   DT A  29    -108.804  14.495   1.270  6.00  0.00           O  
ATOM    925  C5   DT A  29    -106.753  13.415   0.930  9.00  0.00           C  
ATOM    926  C6   DT A  29    -105.584  13.386   0.240  9.00  0.00           C  
ATOM    927  C7   DT A  29    -106.926  12.415   2.090  4.00  0.00           C  
ATOM    928  OP1  DT A  29    -100.994  13.133   3.150  7.00  0.00           O  
ATOM    929  OP2  DT A  29     -98.718  14.066   2.600  2.00  0.00           O1-
ATOM    930  H3   DT A  29    -108.253  15.681  -0.710  4.00  0.00           H  
ATOM    931  H6   DT A  29    -104.835  12.674   0.600  5.00  0.00           H  
ATOM    932  H1'  DT A  29    -104.185  14.133  -2.590  9.00  0.00           H  
ATOM    933  H2'  DT A  29    -103.215  15.443  -0.070  9.00  0.00           H  
ATOM    934  H3'  DT A  29    -101.096  15.526  -1.070  8.00  0.00           H  
ATOM    935  H4'  DT A  29    -101.285  12.768  -1.740  5.00  0.00           H  
ATOM    936  H5'  DT A  29    -102.496  13.691   0.970  4.00  0.00           H  
ATOM    937  H71  DT A  29    -107.977  11.910   2.030  9.00  0.00           H  
ATOM    938  H72  DT A  29    -106.046  11.804   2.170  3.00  0.00           H  
ATOM    939  H73  DT A  29    -106.983  12.992   3.050  1.00  0.00           H  
ATOM    940 H2''  DT A  29    -103.386  16.400  -1.660  5.00  0.00           H  
ATOM    941 H5''  DT A  29    -101.618  12.177   0.570  6.00  0.00           H  
ATOM    942  P    DA A  30    -100.278  15.197  -3.680  9.00  0.00           P  
ATOM    943  C5'  DA A  30    -101.579  16.713  -5.380  2.00  0.00           C  
ATOM    944  O5'  DA A  30    -100.587  16.626  -4.340  7.00  0.00           O  
ATOM    945  C4'  DA A  30    -101.726  18.077  -6.120  5.00  0.00           C  
ATOM    946  O4'  DA A  30    -102.001  18.994  -5.090  5.00  0.00           O  
ATOM    947  C3'  DA A  30    -100.455  18.441  -6.900  1.00  0.00           C  
ATOM    948  O3'  DA A  30    -100.846  19.251  -8.090  4.00  0.00           O  
ATOM    949  C2'  DA A  30     -99.716  19.307  -5.840  2.00  0.00           C  
ATOM    950  C1'  DA A  30    -100.991  19.928  -5.170  1.00  0.00           C  
ATOM    951  N1   DA A  30     -99.426  23.819  -2.190  7.00  0.00           N  
ATOM    952  C2   DA A  30    -100.003  23.781  -3.390  0.00  0.00           C  
ATOM    953  N3   DA A  30    -100.451  22.787  -4.070  8.00  0.00           N  
ATOM    954  C4   DA A  30    -100.306  21.590  -3.320  4.00  0.00           C  
ATOM    955  C5   DA A  30     -99.808  21.406  -2.070  2.00  0.00           C  
ATOM    956  C6   DA A  30     -99.372  22.653  -1.480  5.00  0.00           C  
ATOM    957  N6   DA A  30     -98.835  22.727  -0.280  2.00  0.00           N  
ATOM    958  N7   DA A  30     -99.896  20.050  -1.610  0.00  0.00           N  
ATOM    959  C8   DA A  30    -100.431  19.518  -2.670  0.00  0.00           C  
ATOM    960  N9   DA A  30    -100.609  20.324  -3.800  8.00  0.00           N  
ATOM    961  OP1  DA A  30     -99.975  14.251  -4.710  5.00  0.00           O  
ATOM    962  OP2  DA A  30     -99.209  15.389  -2.640  4.00  0.00           O1-
ATOM    963  H2   DA A  30    -100.115  24.742  -3.850  4.00  0.00           H  
ATOM    964  H8   DA A  30    -100.793  18.489  -2.640  0.00  0.00           H  
ATOM    965  H1'  DA A  30    -101.328  20.813  -5.660  0.00  0.00           H  
ATOM    966  H2'  DA A  30     -99.259  18.564  -5.190  3.00  0.00           H  
ATOM    967  H3'  DA A  30     -99.919  17.467  -7.140  9.00  0.00           H  
ATOM    968  H4'  DA A  30    -102.546  18.050  -6.750  8.00  0.00           H  
ATOM    969  H5'  DA A  30    -102.514  16.474  -4.920  3.00  0.00           H  
ATOM    970  H61  DA A  30     -98.387  23.618  -0.070  7.00  0.00           H  
ATOM    971  H62  DA A  30     -98.855  21.959   0.380  0.00  0.00           H  
ATOM    972 H2''  DA A  30     -99.017  20.084  -6.280  7.00  0.00           H  
ATOM    973 H5''  DA A  30    -101.437  15.869  -6.080  6.00  0.00           H  
ATOM    974  P    DG A  31     -99.872  19.247  -9.280  8.00  0.00           P  
ATOM    975  C5'  DG A  31    -101.299  20.248 -11.350  2.00  0.00           C  
ATOM    976  O5'  DG A  31    -100.407  20.404 -10.310  2.00  0.00           O  
ATOM    977  C4'  DG A  31    -101.054  21.373 -12.360  6.00  0.00           C  
ATOM    978  O4'  DG A  31    -101.032  22.655 -11.820  8.00  0.00           O  
ATOM    979  C3'  DG A  31     -99.672  21.055 -13.120  1.00  0.00           C  
ATOM    980  O3'  DG A  31     -99.922  21.385 -14.570  9.00  0.00           O  
ATOM    981  C2'  DG A  31     -98.899  22.191 -12.440  6.00  0.00           C  
ATOM    982  C1'  DG A  31     -99.903  23.362 -12.380  4.00  0.00           C  
ATOM    983  N1   DG A  31     -98.067  25.054  -7.900  7.00  0.00           N  
ATOM    984  C2   DG A  31     -98.331  23.782  -8.310  9.00  0.00           C  
ATOM    985  N2   DG A  31     -98.094  22.851  -7.480  4.00  0.00           N  
ATOM    986  N3   DG A  31     -98.882  23.418  -9.480  3.00  0.00           N  
ATOM    987  C4   DG A  31     -99.005  24.520 -10.330  4.00  0.00           C  
ATOM    988  C5   DG A  31     -98.621  25.827 -10.070  7.00  0.00           C  
ATOM    989  C6   DG A  31     -98.179  26.193  -8.740  9.00  0.00           C  
ATOM    990  O6   DG A  31     -97.990  27.303  -8.320  2.00  0.00           O  
ATOM    991  N7   DG A  31     -98.942  26.601 -11.160  7.00  0.00           N  
ATOM    992  C8   DG A  31     -99.403  25.749 -12.060  4.00  0.00           C  
ATOM    993  N9   DG A  31     -99.375  24.478 -11.620  3.00  0.00           N  
ATOM    994  OP1  DG A  31    -100.087  17.943  -9.930  9.00  0.00           O  
ATOM    995  OP2  DG A  31     -98.530  19.604  -8.770  6.00  0.00           O1-
ATOM    996  H1   DG A  31     -97.568  25.281  -7.040  1.00  0.00           H  
ATOM    997  H8   DG A  31     -99.614  26.117 -13.080  6.00  0.00           H  
ATOM    998  H1'  DG A  31    -100.101  23.740 -13.370  2.00  0.00           H  
ATOM    999  H2'  DG A  31     -98.646  21.839 -11.450  4.00  0.00           H  
ATOM   1000  H21  DG A  31     -97.871  23.126  -6.570  9.00  0.00           H  
ATOM   1001  H3'  DG A  31     -99.220  20.059 -12.970  7.00  0.00           H  
ATOM   1002  H22  DG A  31     -98.400  21.953  -7.600  0.00  0.00           H  
ATOM   1003  H4'  DG A  31    -101.897  21.295 -13.100  3.00  0.00           H  
ATOM   1004  H5'  DG A  31    -102.330  20.321 -11.070  7.00  0.00           H  
ATOM   1005 H2''  DG A  31     -98.211  22.592 -13.180  0.00  0.00           H  
ATOM   1006 H5''  DG A  31    -101.091  19.270 -11.820  6.00  0.00           H  
ATOM   1007  P    DG A  32     -98.842  21.068 -15.710  9.00  0.00           P  
ATOM   1008  C5'  DG A  32     -97.856  23.489 -16.130  8.00  0.00           C  
ATOM   1009  O5'  DG A  32     -97.715  22.205 -15.640  3.00  0.00           O  
ATOM   1010  C4'  DG A  32     -96.783  24.458 -15.730  6.00  0.00           C  
ATOM   1011  O4'  DG A  32     -96.870  24.884 -14.390  3.00  0.00           O  
ATOM   1012  C3'  DG A  32     -95.452  23.823 -16.030  2.00  0.00           C  
ATOM   1013  O3'  DG A  32     -94.566  24.732 -16.650  1.00  0.00           O  
ATOM   1014  C2'  DG A  32     -94.986  23.629 -14.620  4.00  0.00           C  
ATOM   1015  C1'  DG A  32     -95.586  24.848 -13.840  9.00  0.00           C  
ATOM   1016  N1   DG A  32     -94.920  27.412  -9.490  0.00  0.00           N  
ATOM   1017  C2   DG A  32     -95.125  27.878 -10.790  0.00  0.00           C  
ATOM   1018  N2   DG A  32     -95.176  29.156 -10.890  8.00  0.00           N  
ATOM   1019  N3   DG A  32     -95.218  27.094 -11.880  9.00  0.00           N  
ATOM   1020  C4   DG A  32     -95.375  25.766 -11.550  5.00  0.00           C  
ATOM   1021  C5   DG A  32     -95.365  25.211 -10.280  6.00  0.00           C  
ATOM   1022  C6   DG A  32     -95.074  26.071  -9.170  2.00  0.00           C  
ATOM   1023  O6   DG A  32     -94.926  25.861  -7.980  2.00  0.00           O  
ATOM   1024  N7   DG A  32     -95.568  23.811 -10.320  2.00  0.00           N  
ATOM   1025  C8   DG A  32     -95.678  23.565 -11.620  8.00  0.00           C  
ATOM   1026  N9   DG A  32     -95.595  24.696 -12.400  6.00  0.00           N  
ATOM   1027  OP1  DG A  32     -99.488  21.115 -17.040  7.00  0.00           O  
ATOM   1028  OP2  DG A  32     -98.224  19.776 -15.350  9.00  0.00           O1-
ATOM   1029  H1   DG A  32     -94.862  27.994  -8.640  8.00  0.00           H  
ATOM   1030  H8   DG A  32     -95.822  22.612 -12.110  1.00  0.00           H  
ATOM   1031  H1'  DG A  32     -95.053  25.796 -14.060  5.00  0.00           H  
ATOM   1032  H2'  DG A  32     -95.361  22.703 -14.220  7.00  0.00           H  
ATOM   1033  H21  DG A  32     -94.996  29.835 -10.150  2.00  0.00           H  
ATOM   1034  H3'  DG A  32     -95.569  22.898 -16.600  1.00  0.00           H  
ATOM   1035  H22  DG A  32     -95.020  29.566 -11.830  6.00  0.00           H  
ATOM   1036  H4'  DG A  32     -96.857  25.365 -16.400  0.00  0.00           H  
ATOM   1037  H5'  DG A  32     -98.788  23.972 -15.660  6.00  0.00           H  
ATOM   1038 H2''  DG A  32     -93.881  23.608 -14.580  8.00  0.00           H  
ATOM   1039 H5''  DG A  32     -97.860  23.418 -17.250  7.00  0.00           H  
ATOM   1040  P    DG A  33     -93.254  24.400 -17.480  7.00  0.00           P  
ATOM   1041  C5'  DG A  33     -93.502  25.959 -19.650  9.00  0.00           C  
ATOM   1042  O5'  DG A  33     -92.911  25.688 -18.360  6.00  0.00           O  
ATOM   1043  C4'  DG A  33     -93.036  27.291 -20.330  8.00  0.00           C  
ATOM   1044  O4'  DG A  33     -93.452  28.351 -19.340  0.00  0.00           O  
ATOM   1045  C3'  DG A  33     -91.541  27.695 -20.500  6.00  0.00           C  
ATOM   1046  O3'  DG A  33     -90.758  26.525 -20.600  6.00  0.00           O  
ATOM   1047  C2'  DG A  33     -91.214  28.406 -19.190  5.00  0.00           C  
ATOM   1048  C1'  DG A  33     -92.452  29.303 -19.020  6.00  0.00           C  
ATOM   1049  N1   DG A  33     -93.265  28.548 -14.010  5.00  0.00           N  
ATOM   1050  C2   DG A  33     -93.019  27.636 -14.960  7.00  0.00           C  
ATOM   1051  N2   DG A  33     -92.733  26.418 -14.520  0.00  0.00           N  
ATOM   1052  N3   DG A  33     -92.649  27.957 -16.240  6.00  0.00           N  
ATOM   1053  C4   DG A  33     -92.847  29.338 -16.560  5.00  0.00           C  
ATOM   1054  C5   DG A  33     -93.163  30.268 -15.630  0.00  0.00           C  
ATOM   1055  C6   DG A  33     -93.346  29.878 -14.260  3.00  0.00           C  
ATOM   1056  O6   DG A  33     -93.778  30.537 -13.300  6.00  0.00           O  
ATOM   1057  N7   DG A  33     -93.338  31.515 -16.240  5.00  0.00           N  
ATOM   1058  C8   DG A  33     -93.035  31.239 -17.480  7.00  0.00           C  
ATOM   1059  N9   DG A  33     -92.837  29.940 -17.770  5.00  0.00           N  
ATOM   1060  OP1  DG A  33     -93.457  23.283 -18.340  6.00  0.00           O  
ATOM   1061  OP2  DG A  33     -92.150  24.227 -16.450  8.00  0.00           O1-
ATOM   1062  H1   DG A  33     -93.608  28.319 -13.050  3.00  0.00           H  
ATOM   1063  H8   DG A  33     -92.896  31.997 -18.220  6.00  0.00           H  
ATOM   1064  H1'  DG A  33     -92.512  29.956 -19.940  0.00  0.00           H  
ATOM   1065  H2'  DG A  33     -91.242  27.658 -18.350  0.00  0.00           H  
ATOM   1066  H21  DG A  33     -92.770  26.180 -13.530  2.00  0.00           H  
ATOM   1067  H3'  DG A  33     -91.462  28.410 -21.360  9.00  0.00           H  
ATOM   1068  H22  DG A  33     -92.431  25.684 -15.220  3.00  0.00           H  
ATOM   1069  H4'  DG A  33     -93.720  27.376 -21.230  5.00  0.00           H  
ATOM   1070  H5'  DG A  33     -94.588  25.979 -19.590  3.00  0.00           H  
ATOM   1071 H2''  DG A  33     -90.329  29.002 -19.250  9.00  0.00           H  
ATOM   1072 H5''  DG A  33     -93.398  25.051 -20.250  8.00  0.00           H  
ATOM   1073  P    DT A  34     -90.232  25.995 -21.970  5.00  0.00           P  
ATOM   1074  C5'  DT A  34     -91.683  23.835 -21.920  9.00  0.00           C  
ATOM   1075  O5'  DT A  34     -91.338  25.035 -22.520  3.00  0.00           O  
ATOM   1076  C4'  DT A  34     -90.883  22.732 -22.560  9.00  0.00           C  
ATOM   1077  O4'  DT A  34     -91.247  21.448 -22.010  5.00  0.00           O  
ATOM   1078  C3'  DT A  34     -91.193  22.530 -24.140  7.00  0.00           C  
ATOM   1079  O3'  DT A  34     -90.061  22.036 -24.900  4.00  0.00           O  
ATOM   1080  C2'  DT A  34     -92.201  21.414 -24.170  2.00  0.00           C  
ATOM   1081  C1'  DT A  34     -91.553  20.576 -23.020  5.00  0.00           C  
ATOM   1082  N1   DT A  34     -92.433  19.482 -22.510  4.00  0.00           N  
ATOM   1083  C2   DT A  34     -92.162  18.121 -22.920  3.00  0.00           C  
ATOM   1084  O2   DT A  34     -91.138  17.775 -23.570  0.00  0.00           O  
ATOM   1085  N3   DT A  34     -93.101  17.146 -22.620  4.00  0.00           N  
ATOM   1086  C4   DT A  34     -94.199  17.359 -21.860  0.00  0.00           C  
ATOM   1087  O4   DT A  34     -94.878  16.399 -21.520  9.00  0.00           O  
ATOM   1088  C5   DT A  34     -94.350  18.766 -21.410  5.00  0.00           C  
ATOM   1089  C6   DT A  34     -93.590  19.753 -21.790  0.00  0.00           C  
ATOM   1090  C7   DT A  34     -95.478  19.141 -20.500  7.00  0.00           C  
ATOM   1091  OP1  DT A  34     -89.027  25.234 -21.590  7.00  0.00           O  
ATOM   1092  OP2  DT A  34     -90.138  27.156 -22.870  0.00  0.00           O1-
ATOM   1093  H3   DT A  34     -92.953  16.190 -22.930  4.00  0.00           H  
ATOM   1094  H6   DT A  34     -93.769  20.829 -21.520  7.00  0.00           H  
ATOM   1095  H1'  DT A  34     -90.718  20.024 -23.480  6.00  0.00           H  
ATOM   1096  H2'  DT A  34     -93.154  21.717 -23.890  6.00  0.00           H  
ATOM   1097  H3'  DT A  34     -91.611  23.422 -24.670  2.00  0.00           H  
ATOM   1098  H4'  DT A  34     -89.878  23.043 -22.410  6.00  0.00           H  
ATOM   1099  H5'  DT A  34     -92.730  23.534 -22.110  5.00  0.00           H  
ATOM   1100  H71  DT A  34     -95.262  18.901 -19.430  4.00  0.00           H  
ATOM   1101  H72  DT A  34     -95.646  20.177 -20.610  5.00  0.00           H  
ATOM   1102  H73  DT A  34     -96.326  18.735 -20.910  5.00  0.00           H  
ATOM   1103 H2''  DT A  34     -92.290  20.959 -25.110  2.00  0.00           H  
ATOM   1104 H5''  DT A  34     -91.430  23.906 -20.850  4.00  0.00           H  
ATOM   1105  P    DT A  35     -89.661  22.456 -26.320  4.00  0.00           P  
ATOM   1106  C5'  DT A  35     -89.842  20.086 -27.370  5.00  0.00           C  
ATOM   1107  O5'  DT A  35     -90.363  21.429 -27.250  2.00  0.00           O  
ATOM   1108  C4'  DT A  35     -90.735  19.108 -28.190  4.00  0.00           C  
ATOM   1109  O4'  DT A  35     -91.995  18.904 -27.490  8.00  0.00           O  
ATOM   1110  C3'  DT A  35     -90.981  19.612 -29.600  5.00  0.00           C  
ATOM   1111  O3'  DT A  35     -91.136  18.599 -30.590  7.00  0.00           O  
ATOM   1112  C2'  DT A  35     -92.256  20.306 -29.280  0.00  0.00           C  
ATOM   1113  C1'  DT A  35     -93.021  19.355 -28.320  8.00  0.00           C  
ATOM   1114  N1   DT A  35     -94.190  19.998 -27.690  5.00  0.00           N  
ATOM   1115  C2   DT A  35     -95.393  19.309 -27.770  2.00  0.00           C  
ATOM   1116  O2   DT A  35     -95.584  18.136 -28.040  6.00  0.00           O  
ATOM   1117  N3   DT A  35     -96.521  19.929 -27.340  3.00  0.00           N  
ATOM   1118  C4   DT A  35     -96.577  21.174 -26.910  4.00  0.00           C  
ATOM   1119  O4   DT A  35     -97.646  21.631 -26.520  7.00  0.00           O  
ATOM   1120  C5   DT A  35     -95.317  21.901 -26.860  9.00  0.00           C  
ATOM   1121  C6   DT A  35     -94.150  21.272 -27.220  0.00  0.00           C  
ATOM   1122  C7   DT A  35     -95.283  23.392 -26.500  5.00  0.00           C  
ATOM   1123  OP1  DT A  35     -88.202  22.257 -26.430  2.00  0.00           O  
ATOM   1124  OP2  DT A  35     -90.245  23.744 -26.720  0.00  0.00           O1-
ATOM   1125  H3   DT A  35     -97.474  19.414 -27.240  8.00  0.00           H  
ATOM   1126  H6   DT A  35     -93.235  21.806 -27.130  5.00  0.00           H  
ATOM   1127  H1'  DT A  35     -93.365  18.457 -28.800  4.00  0.00           H  
ATOM   1128  H2'  DT A  35     -92.138  21.209 -28.830  1.00  0.00           H  
ATOM   1129  H3'  DT A  35     -90.198  20.355 -29.860  2.00  0.00           H  
ATOM   1130  H4'  DT A  35     -90.079  18.211 -28.260  6.00  0.00           H  
ATOM   1131  H5'  DT A  35     -89.523  19.643 -26.380  1.00  0.00           H  
ATOM   1132  H71  DT A  35     -94.208  23.618 -26.400  1.00  0.00           H  
ATOM   1133  H72  DT A  35     -95.685  24.044 -27.290  8.00  0.00           H  
ATOM   1134  H73  DT A  35     -95.823  23.559 -25.570  3.00  0.00           H  
ATOM   1135 H2''  DT A  35     -92.774  20.469 -30.250  9.00  0.00           H  
ATOM   1136 H5''  DT A  35     -88.970  20.311 -27.930  9.00  0.00           H  
ATOM   1137  P    DA A  36     -90.327  18.733 -31.940  0.00  0.00           P  
ATOM   1138  C5'  DA A  36     -90.567  16.067 -32.520  5.00  0.00           C  
ATOM   1139  O5'  DA A  36     -90.810  17.484 -32.820  5.00  0.00           O  
ATOM   1140  C4'  DA A  36     -91.669  15.179 -32.980  4.00  0.00           C  
ATOM   1141  O4'  DA A  36     -92.713  15.389 -32.030  0.00  0.00           O  
ATOM   1142  C3'  DA A  36     -92.148  15.368 -34.380  8.00  0.00           C  
ATOM   1143  O3'  DA A  36     -92.545  14.168 -35.050  6.00  0.00           O  
ATOM   1144  C2'  DA A  36     -93.378  16.279 -34.150  5.00  0.00           C  
ATOM   1145  C1'  DA A  36     -93.885  15.877 -32.760  0.00  0.00           C  
ATOM   1146  N1   DA A  36     -98.351  17.548 -30.820  3.00  0.00           N  
ATOM   1147  C2   DA A  36     -97.882  16.347 -31.100  0.00  0.00           C  
ATOM   1148  N3   DA A  36     -96.643  16.012 -31.470  8.00  0.00           N  
ATOM   1149  C4   DA A  36     -95.788  17.097 -31.550  0.00  0.00           C  
ATOM   1150  C5   DA A  36     -96.060  18.394 -31.230  3.00  0.00           C  
ATOM   1151  C6   DA A  36     -97.384  18.534 -30.840  5.00  0.00           C  
ATOM   1152  N6   DA A  36     -97.840  19.751 -30.570  9.00  0.00           N  
ATOM   1153  N7   DA A  36     -94.988  19.231 -31.490  1.00  0.00           N  
ATOM   1154  C8   DA A  36     -94.091  18.343 -31.910  4.00  0.00           C  
ATOM   1155  N9   DA A  36     -94.481  17.052 -31.950  9.00  0.00           N  
ATOM   1156  OP1  DA A  36     -88.854  18.687 -31.580  2.00  0.00           O  
ATOM   1157  OP2  DA A  36     -90.917  19.924 -32.550  1.00  0.00           O1-
ATOM   1158  H2   DA A  36     -98.681  15.543 -31.210  0.00  0.00           H  
ATOM   1159  H8   DA A  36     -93.067  18.534 -32.190  4.00  0.00           H  
ATOM   1160  H1'  DA A  36     -94.646  15.077 -32.780  7.00  0.00           H  
ATOM   1161  H2'  DA A  36     -92.957  17.326 -34.180  5.00  0.00           H  
ATOM   1162  H3'  DA A  36     -91.402  15.816 -35.030  5.00  0.00           H  
ATOM   1163  H4'  DA A  36     -91.304  14.143 -32.940  2.00  0.00           H  
ATOM   1164  H5'  DA A  36     -90.487  15.908 -31.420  6.00  0.00           H  
ATOM   1165  H61  DA A  36     -98.813  19.841 -30.350  0.00  0.00           H  
ATOM   1166  H62  DA A  36     -97.315  20.604 -30.710  2.00  0.00           H  
ATOM   1167 H2''  DA A  36     -94.062  16.187 -35.030  0.00  0.00           H  
ATOM   1168 H5''  DA A  36     -89.637  15.773 -33.010  4.00  0.00           H  
ATOM   1169  P    DG A  37     -93.137  14.059 -36.500  4.00  0.00           P  
ATOM   1170  C5'  DG A  37     -95.224  13.189 -35.430  2.00  0.00           C  
ATOM   1171  O5'  DG A  37     -94.673  14.217 -36.210  0.00  0.00           O  
ATOM   1172  C4'  DG A  37     -96.702  13.499 -35.000  1.00  0.00           C  
ATOM   1173  O4'  DG A  37     -96.928  14.774 -34.320  1.00  0.00           O  
ATOM   1174  C3'  DG A  37     -97.656  13.378 -36.220  2.00  0.00           C  
ATOM   1175  O3'  DG A  37     -98.875  12.726 -35.820  9.00  0.00           O  
ATOM   1176  C2'  DG A  37     -97.800  14.987 -36.510  1.00  0.00           C  
ATOM   1177  C1'  DG A  37     -98.016  15.389 -35.050  3.00  0.00           C  
ATOM   1178  N1   DG A  37    -100.466  19.306 -32.920  8.00  0.00           N  
ATOM   1179  C2   DG A  37    -100.782  18.019 -33.180  9.00  0.00           C  
ATOM   1180  N2   DG A  37    -101.920  17.620 -32.720  4.00  0.00           N  
ATOM   1181  N3   DG A  37    -100.046  17.080 -33.660  6.00  0.00           N  
ATOM   1182  C4   DG A  37     -98.785  17.553 -34.030  5.00  0.00           C  
ATOM   1183  C5   DG A  37     -98.371  18.815 -34.020  5.00  0.00           C  
ATOM   1184  C6   DG A  37     -99.188  19.767 -33.340  1.00  0.00           C  
ATOM   1185  O6   DG A  37     -98.927  20.912 -33.070  6.00  0.00           O  
ATOM   1186  N7   DG A  37     -97.126  18.928 -34.560  4.00  0.00           N  
ATOM   1187  C8   DG A  37     -96.845  17.737 -35.100  3.00  0.00           C  
ATOM   1188  N9   DG A  37     -97.829  16.816 -34.790  4.00  0.00           N  
ATOM   1189  OP1  DG A  37     -92.885  12.705 -37.080  3.00  0.00           O  
ATOM   1190  OP2  DG A  37     -92.621  15.262 -37.230  9.00  0.00           O1-
ATOM   1191  H1   DG A  37    -101.137  19.978 -32.470  9.00  0.00           H  
ATOM   1192  H8   DG A  37     -96.068  17.545 -35.820  8.00  0.00           H  
ATOM   1193  H1'  DG A  37     -98.955  15.126 -34.650  8.00  0.00           H  
ATOM   1194  H2'  DG A  37     -96.849  15.382 -36.920  3.00  0.00           H  
ATOM   1195  H21  DG A  37    -102.528  18.331 -32.400  1.00  0.00           H  
ATOM   1196  H3'  DG A  37     -97.160  12.887 -37.050  0.00  0.00           H  
ATOM   1197  H22  DG A  37    -102.217  16.710 -32.730  0.00  0.00           H  
ATOM   1198  H4'  DG A  37     -96.931  12.706 -34.240  7.00  0.00           H  
ATOM   1199  H5'  DG A  37     -94.686  13.124 -34.550  6.00  0.00           H  
ATOM   1200 H2''  DG A  37     -98.657  15.296 -37.080  3.00  0.00           H  
ATOM   1201 H5''  DG A  37     -95.157  12.238 -36.030  6.00  0.00           H  
ATOM   1202  P    DG A  38     -99.920  12.226 -37.020  2.00  0.00           P  
ATOM   1203  C5'  DG A  38    -101.960  13.156 -35.600  0.00  0.00           C  
ATOM   1204  O5'  DG A  38    -101.074  13.249 -36.760  2.00  0.00           O  
ATOM   1205  C4'  DG A  38    -103.034  14.309 -35.550  9.00  0.00           C  
ATOM   1206  O4'  DG A  38    -102.488  15.579 -35.250  5.00  0.00           O  
ATOM   1207  C3'  DG A  38    -103.729  14.510 -37.010  7.00  0.00           C  
ATOM   1208  O3'  DG A  38    -105.104  14.825 -36.980  0.00  0.00           O  
ATOM   1209  C2'  DG A  38    -102.957  15.713 -37.460  4.00  0.00           C  
ATOM   1210  C1'  DG A  38    -103.012  16.520 -36.120  7.00  0.00           C  
ATOM   1211  N1   DG A  38    -103.866  21.442 -35.270  9.00  0.00           N  
ATOM   1212  C2   DG A  38    -104.627  20.324 -34.920  2.00  0.00           C  
ATOM   1213  N2   DG A  38    -105.800  20.668 -34.420  6.00  0.00           N  
ATOM   1214  N3   DG A  38    -104.299  19.056 -35.150  1.00  0.00           N  
ATOM   1215  C4   DG A  38    -103.035  18.942 -35.630  0.00  0.00           C  
ATOM   1216  C5   DG A  38    -102.201  19.976 -36.000  8.00  0.00           C  
ATOM   1217  C6   DG A  38    -102.616  21.326 -35.780  5.00  0.00           C  
ATOM   1218  O6   DG A  38    -102.018  22.399 -35.970  8.00  0.00           O  
ATOM   1219  N7   DG A  38    -101.075  19.473 -36.610  9.00  0.00           N  
ATOM   1220  C8   DG A  38    -101.267  18.204 -36.670  2.00  0.00           C  
ATOM   1221  N9   DG A  38    -102.380  17.804 -36.090  1.00  0.00           N  
ATOM   1222  OP1  DG A  38    -100.427  10.876 -36.740  8.00  0.00           O  
ATOM   1223  OP2  DG A  38     -99.366  12.582 -38.360  3.00  0.00           O1-
ATOM   1224  H1   DG A  38    -104.125  22.378 -35.070  2.00  0.00           H  
ATOM   1225  H8   DG A  38    -100.542  17.547 -37.250  9.00  0.00           H  
ATOM   1226  H1'  DG A  38    -103.967  16.643 -35.810  0.00  0.00           H  
ATOM   1227  H2'  DG A  38    -101.956  15.397 -37.710  8.00  0.00           H  
ATOM   1228  H21  DG A  38    -105.939  21.638 -34.440  4.00  0.00           H  
ATOM   1229  H3'  DG A  38    -103.518  13.688 -37.690  8.00  0.00           H  
ATOM   1230  H22  DG A  38    -106.488  20.005 -34.150  2.00  0.00           H  
ATOM   1231  H4'  DG A  38    -103.799  14.073 -34.840  8.00  0.00           H  
ATOM   1232  H5'  DG A  38    -101.441  13.091 -34.630  2.00  0.00           H  
ATOM   1233 H2''  DG A  38    -103.516  16.173 -38.230  7.00  0.00           H  
ATOM   1234 H5''  DG A  38    -102.496  12.224 -35.690  2.00  0.00           H  
ATOM   1235  P    DG A  39    -106.216  13.832 -37.350  1.00  0.00           P  
ATOM   1236  C5'  DG A  39    -108.304  14.729 -36.170  0.00  0.00           C  
ATOM   1237  O5'  DG A  39    -107.564  14.683 -37.330  5.00  0.00           O  
ATOM   1238  C4'  DG A  39    -109.334  15.811 -36.230  9.00  0.00           C  
ATOM   1239  O4'  DG A  39    -108.701  17.058 -36.220  8.00  0.00           O  
ATOM   1240  C3'  DG A  39    -110.200  15.808 -37.520  1.00  0.00           C  
ATOM   1241  O3'  DG A  39    -111.586  16.017 -37.150  5.00  0.00           O  
ATOM   1242  C2'  DG A  39    -109.556  16.868 -38.350  1.00  0.00           C  
ATOM   1243  C1'  DG A  39    -109.082  17.873 -37.310  4.00  0.00           C  
ATOM   1244  N1   DG A  39    -106.653  22.266 -37.960  6.00  0.00           N  
ATOM   1245  C2   DG A  39    -107.918  21.976 -37.620  5.00  0.00           C  
ATOM   1246  N2   DG A  39    -108.704  22.974 -37.310  6.00  0.00           N  
ATOM   1247  N3   DG A  39    -108.482  20.814 -37.560  0.00  0.00           N  
ATOM   1248  C4   DG A  39    -107.522  19.834 -37.760  6.00  0.00           C  
ATOM   1249  C5   DG A  39    -106.158  19.979 -38.010  0.00  0.00           C  
ATOM   1250  C6   DG A  39    -105.659  21.324 -38.080  4.00  0.00           C  
ATOM   1251  O6   DG A  39    -104.489  21.741 -38.260  1.00  0.00           O  
ATOM   1252  N7   DG A  39    -105.648  18.691 -38.260  2.00  0.00           N  
ATOM   1253  C8   DG A  39    -106.646  17.909 -38.060  3.00  0.00           C  
ATOM   1254  N9   DG A  39    -107.789  18.503 -37.630  2.00  0.00           N  
ATOM   1255  OP1  DG A  39    -106.330  12.698 -36.450  1.00  0.00           O  
ATOM   1256  OP2  DG A  39    -105.918  13.561 -38.770  6.00  0.00           O1-
ATOM   1257  H1   DG A  39    -106.547  23.262 -38.210  9.00  0.00           H  
ATOM   1258  H8   DG A  39    -106.511  16.822 -38.200  0.00  0.00           H  
ATOM   1259  H1'  DG A  39    -109.927  18.519 -37.070  5.00  0.00           H  
ATOM   1260  H2'  DG A  39    -108.714  16.333 -38.790  9.00  0.00           H  
ATOM   1261  H21  DG A  39    -108.330  23.887 -37.430  7.00  0.00           H  
ATOM   1262  H3'  DG A  39    -110.113  14.842 -38.010  2.00  0.00           H  
ATOM   1263  H22  DG A  39    -109.689  22.834 -37.110  4.00  0.00           H  
ATOM   1264  H4'  DG A  39    -110.078  15.700 -35.390  2.00  0.00           H  
ATOM   1265  H5'  DG A  39    -107.731  14.721 -35.200  4.00  0.00           H  
ATOM   1266 H2''  DG A  39    -110.266  17.287 -39.020  7.00  0.00           H  
ATOM   1267 H5''  DG A  39    -108.946  13.803 -36.040  2.00  0.00           H  
ATOM   1268  P    DT A  40    -112.725  16.146 -38.250  4.00  0.00           P  
ATOM   1269  C5'  DT A  40    -113.385  18.583 -37.820  6.00  0.00           C  
ATOM   1270  O5'  DT A  40    -112.800  17.686 -38.730  0.00  0.00           O  
ATOM   1271  C4'  DT A  40    -113.429  20.182 -38.120  6.00  0.00           C  
ATOM   1272  O4'  DT A  40    -112.084  20.643 -38.190  6.00  0.00           O  
ATOM   1273  C3'  DT A  40    -114.267  20.646 -39.310  5.00  0.00           C  
ATOM   1274  O3'  DT A  40    -115.010  21.875 -39.060  9.00  0.00           O  
ATOM   1275  C2'  DT A  40    -113.139  20.744 -40.350  4.00  0.00           C  
ATOM   1276  C1'  DT A  40    -112.028  21.238 -39.480  3.00  0.00           C  
ATOM   1277  N1   DT A  40    -110.714  21.051 -40.180  2.00  0.00           N  
ATOM   1278  C2   DT A  40    -109.943  22.196 -40.360  8.00  0.00           C  
ATOM   1279  O2   DT A  40    -110.265  23.318 -40.000  9.00  0.00           O  
ATOM   1280  N3   DT A  40    -108.696  22.039 -40.840  7.00  0.00           N  
ATOM   1281  C4   DT A  40    -108.112  20.867 -41.200  4.00  0.00           C  
ATOM   1282  O4   DT A  40    -106.986  20.928 -41.570  0.00  0.00           O  
ATOM   1283  C5   DT A  40    -108.943  19.710 -41.070  5.00  0.00           C  
ATOM   1284  C6   DT A  40    -110.243  19.850 -40.590  0.00  0.00           C  
ATOM   1285  C7   DT A  40    -108.352  18.274 -41.280  4.00  0.00           C  
ATOM   1286  OP1  DT A  40    -114.009  15.833 -37.650  1.00  0.00           O  
ATOM   1287  OP2  DT A  40    -112.262  15.281 -39.360  2.00  0.00           O1-
ATOM   1288  H3   DT A  40    -108.361  22.899 -41.180  9.00  0.00           H  
ATOM   1289  H6   DT A  40    -110.827  18.938 -40.400  0.00  0.00           H  
ATOM   1290  H1'  DT A  40    -112.316  22.316 -39.310  7.00  0.00           H  
ATOM   1291  H2'  DT A  40    -112.890  19.727 -40.750  5.00  0.00           H  
ATOM   1292  H3'  DT A  40    -114.931  19.867 -39.540  2.00  0.00           H  
ATOM   1293  H4'  DT A  40    -113.911  20.615 -37.190  9.00  0.00           H  
ATOM   1294  H5'  DT A  40    -112.749  18.460 -36.990  4.00  0.00           H  
ATOM   1295  H71  DT A  40    -108.959  17.440 -40.880  3.00  0.00           H  
ATOM   1296  H72  DT A  40    -108.180  18.114 -42.270  9.00  0.00           H  
ATOM   1297  H73  DT A  40    -107.432  18.265 -40.750  4.00  0.00           H  
ATOM   1298 H2''  DT A  40    -113.466  21.462 -41.060  4.00  0.00           H  
ATOM   1299 H5''  DT A  40    -114.336  18.207 -37.440  9.00  0.00           H  
ATOM   1300  P    DT A  41    -115.843  22.696 -40.200  2.00  0.00           P  
ATOM   1301  C5'  DT A  41    -114.683  25.110 -40.380  6.00  0.00           C  
ATOM   1302  O5'  DT A  41    -114.960  23.775 -40.910  6.00  0.00           O  
ATOM   1303  C4'  DT A  41    -114.042  25.940 -41.440  8.00  0.00           C  
ATOM   1304  O4'  DT A  41    -112.719  25.395 -41.770  2.00  0.00           O  
ATOM   1305  C3'  DT A  41    -114.843  26.056 -42.750  1.00  0.00           C  
ATOM   1306  O3'  DT A  41    -114.625  27.282 -43.330  9.00  0.00           O  
ATOM   1307  C2'  DT A  41    -114.182  24.990 -43.620  6.00  0.00           C  
ATOM   1308  C1'  DT A  41    -112.696  25.340 -43.170  9.00  0.00           C  
ATOM   1309  N1   DT A  41    -111.705  24.342 -43.510  1.00  0.00           N  
ATOM   1310  C2   DT A  41    -110.353  24.819 -43.790  2.00  0.00           C  
ATOM   1311  O2   DT A  41    -110.124  26.024 -43.790  7.00  0.00           O  
ATOM   1312  N3   DT A  41    -109.403  23.852 -44.060  2.00  0.00           N  
ATOM   1313  C4   DT A  41    -109.568  22.476 -44.130  1.00  0.00           C  
ATOM   1314  O4   DT A  41    -108.586  21.735 -44.470  4.00  0.00           O  
ATOM   1315  C5   DT A  41    -110.974  22.044 -43.740  5.00  0.00           C  
ATOM   1316  C6   DT A  41    -111.953  22.978 -43.440  5.00  0.00           C  
ATOM   1317  C7   DT A  41    -111.392  20.628 -43.700  6.00  0.00           C  
ATOM   1318  OP1  DT A  41    -116.999  23.390 -39.490  9.00  0.00           O  
ATOM   1319  OP2  DT A  41    -116.143  21.701 -41.200  9.00  0.00           O1-
ATOM   1320  H3   DT A  41    -108.546  24.222 -44.310  7.00  0.00           H  
ATOM   1321  H6   DT A  41    -112.832  22.565 -42.980  5.00  0.00           H  
ATOM   1322  H1'  DT A  41    -112.449  26.324 -43.600  9.00  0.00           H  
ATOM   1323  H2'  DT A  41    -114.388  23.966 -43.400  3.00  0.00           H  
ATOM   1324  H3'  DT A  41    -115.955  25.847 -42.640  1.00  0.00           H  
ATOM   1325  H4'  DT A  41    -113.811  26.952 -41.000  5.00  0.00           H  
ATOM   1326  H5'  DT A  41    -114.108  24.987 -39.530  2.00  0.00           H  
ATOM   1327  H71  DT A  41    -112.305  20.464 -43.130  5.00  0.00           H  
ATOM   1328  H72  DT A  41    -111.383  20.114 -44.680  1.00  0.00           H  
ATOM   1329  H73  DT A  41    -110.711  20.084 -43.050  1.00  0.00           H  
ATOM   1330 H2''  DT A  41    -114.455  25.158 -44.650  6.00  0.00           H  
ATOM   1331 H5''  DT A  41    -115.634  25.546 -40.060  0.00  0.00           H  
ATOM   1332  P    DA A  42    -115.836  28.209 -43.670  0.00  0.00           P  
ATOM   1333  C5'  DA A  42    -114.289  30.235 -43.460  4.00  0.00           C  
ATOM   1334  O5'  DA A  42    -115.164  29.580 -44.290  8.00  0.00           O  
ATOM   1335  C4'  DA A  42    -113.050  30.992 -44.140  7.00  0.00           C  
ATOM   1336  O4'  DA A  42    -111.966  30.135 -44.520  3.00  0.00           O  
ATOM   1337  C3'  DA A  42    -113.505  31.822 -45.380  5.00  0.00           C  
ATOM   1338  O3'  DA A  42    -112.715  32.995 -45.430  1.00  0.00           O  
ATOM   1339  C2'  DA A  42    -113.163  30.803 -46.440  9.00  0.00           C  
ATOM   1340  C1'  DA A  42    -111.847  30.106 -45.890  4.00  0.00           C  
ATOM   1341  N1   DA A  42    -108.413  26.803 -47.890  0.00  0.00           N  
ATOM   1342  C2   DA A  42    -108.442  28.099 -47.680  9.00  0.00           C  
ATOM   1343  N3   DA A  42    -109.306  28.878 -47.010  7.00  0.00           N  
ATOM   1344  C4   DA A  42    -110.440  28.183 -46.750  6.00  0.00           C  
ATOM   1345  C5   DA A  42    -110.641  26.795 -46.930  2.00  0.00           C  
ATOM   1346  C6   DA A  42    -109.502  26.149 -47.450  4.00  0.00           C  
ATOM   1347  N6   DA A  42    -109.297  24.879 -47.590  9.00  0.00           N  
ATOM   1348  N7   DA A  42    -111.928  26.475 -46.540  1.00  0.00           N  
ATOM   1349  C8   DA A  42    -112.428  27.594 -46.100  2.00  0.00           C  
ATOM   1350  N9   DA A  42    -111.598  28.701 -46.270  1.00  0.00           N  
ATOM   1351  OP1  DA A  42    -116.618  28.605 -42.500  2.00  0.00           O  
ATOM   1352  OP2  DA A  42    -116.537  27.622 -44.830  2.00  0.00           O1-
ATOM   1353  H2   DA A  42    -107.528  28.661 -47.930  6.00  0.00           H  
ATOM   1354  H8   DA A  42    -113.465  27.787 -45.840  7.00  0.00           H  
ATOM   1355  H1'  DA A  42    -110.952  30.724 -46.220  0.00  0.00           H  
ATOM   1356  H2'  DA A  42    -113.983  30.158 -46.570  9.00  0.00           H  
ATOM   1357  H3'  DA A  42    -114.595  31.942 -45.260  2.00  0.00           H  
ATOM   1358  H4'  DA A  42    -112.707  31.727 -43.440  2.00  0.00           H  
ATOM   1359  H5'  DA A  42    -113.889  29.503 -42.800  0.00  0.00           H  
ATOM   1360  H61  DA A  42    -108.466  24.542 -47.990  6.00  0.00           H  
ATOM   1361  H62  DA A  42    -110.112  24.339 -47.470  7.00  0.00           H  
ATOM   1362 H2''  DA A  42    -112.938  31.300 -47.350  8.00  0.00           H  
ATOM   1363 H5''  DA A  42    -114.789  30.983 -42.800  6.00  0.00           H  
ATOM   1364  P    DG A  43    -112.880  34.106 -46.580  1.00  0.00           P  
ATOM   1365  C5'  DG A  43    -110.660  33.967 -48.070  6.00  0.00           C  
ATOM   1366  O5'  DG A  43    -111.983  33.568 -47.810  4.00  0.00           O  
ATOM   1367  C4'  DG A  43    -110.141  33.273 -49.310  6.00  0.00           C  
ATOM   1368  O4'  DG A  43    -110.259  31.888 -49.140  4.00  0.00           O  
ATOM   1369  C3'  DG A  43    -110.851  33.611 -50.620  6.00  0.00           C  
ATOM   1370  O3'  DG A  43    -109.899  33.687 -51.710  9.00  0.00           O  
ATOM   1371  C2'  DG A  43    -111.646  32.324 -50.820  6.00  0.00           C  
ATOM   1372  C1'  DG A  43    -110.582  31.325 -50.400  6.00  0.00           C  
ATOM   1373  N1   DG A  43    -109.289  26.396 -50.830  6.00  0.00           N  
ATOM   1374  C2   DG A  43    -108.533  27.507 -50.940  5.00  0.00           C  
ATOM   1375  N2   DG A  43    -107.190  27.323 -51.110  3.00  0.00           N  
ATOM   1376  N3   DG A  43    -109.041  28.787 -50.850  2.00  0.00           N  
ATOM   1377  C4   DG A  43    -110.389  28.788 -50.470  7.00  0.00           C  
ATOM   1378  C5   DG A  43    -111.206  27.692 -50.220  4.00  0.00           C  
ATOM   1379  C6   DG A  43    -110.622  26.369 -50.450  3.00  0.00           C  
ATOM   1380  O6   DG A  43    -111.133  25.262 -50.250  0.00  0.00           O  
ATOM   1381  N7   DG A  43    -112.476  28.134 -49.840  6.00  0.00           N  
ATOM   1382  C8   DG A  43    -112.371  29.463 -49.870  7.00  0.00           C  
ATOM   1383  N9   DG A  43    -111.089  29.937 -50.170  4.00  0.00           N  
ATOM   1384  OP1  DG A  43    -112.287  35.307 -46.000  2.00  0.00           O  
ATOM   1385  OP2  DG A  43    -114.347  34.193 -46.880  8.00  0.00           O1-
ATOM   1386  H1   DG A  43    -108.746  25.489 -50.930  3.00  0.00           H  
ATOM   1387  H8   DG A  43    -113.156  30.143 -49.650  6.00  0.00           H  
ATOM   1388  H1'  DG A  43    -109.740  31.254 -51.050  8.00  0.00           H  
ATOM   1389  H2'  DG A  43    -112.506  32.191 -50.280  4.00  0.00           H  
ATOM   1390  H21  DG A  43    -106.757  26.428 -51.100  6.00  0.00           H  
ATOM   1391  H3'  DG A  43    -111.481  34.495 -50.560  8.00  0.00           H  
ATOM   1392  H22  DG A  43    -106.541  28.068 -51.170  7.00  0.00           H  
ATOM   1393  H4'  DG A  43    -109.075  33.327 -49.420  4.00  0.00           H  
ATOM   1394  H5'  DG A  43    -109.886  33.797 -47.280  2.00  0.00           H  
ATOM   1395 H2''  DG A  43    -111.861  32.123 -51.880  9.00  0.00           H  
ATOM   1396 H5''  DG A  43    -110.543  35.039 -48.270  3.00  0.00           H  
ATOM   1397  P    DG A  44    -109.310  35.092 -52.310  9.00  0.00           P  
ATOM   1398  C5'  DG A  44    -106.930  34.070 -52.280  9.00  0.00           C  
ATOM   1399  O5'  DG A  44    -108.011  34.616 -53.010  3.00  0.00           O  
ATOM   1400  C4'  DG A  44    -105.905  33.237 -53.200  1.00  0.00           C  
ATOM   1401  O4'  DG A  44    -106.223  31.841 -53.270  6.00  0.00           O  
ATOM   1402  C3'  DG A  44    -105.787  33.769 -54.660  7.00  0.00           C  
ATOM   1403  O3'  DG A  44    -104.427  33.402 -55.050  1.00  0.00           O  
ATOM   1404  C2'  DG A  44    -106.774  32.806 -55.370  6.00  0.00           C  
ATOM   1405  C1'  DG A  44    -106.737  31.573 -54.530  6.00  0.00           C  
ATOM   1406  N1   DG A  44    -109.199  27.201 -54.080  5.00  0.00           N  
ATOM   1407  C2   DG A  44    -107.991  27.457 -54.490  5.00  0.00           C  
ATOM   1408  N2   DG A  44    -107.288  26.398 -54.680  7.00  0.00           N  
ATOM   1409  N3   DG A  44    -107.450  28.666 -54.370  2.00  0.00           N  
ATOM   1410  C4   DG A  44    -108.358  29.628 -54.140  2.00  0.00           C  
ATOM   1411  C5   DG A  44    -109.725  29.444 -54.090  9.00  0.00           C  
ATOM   1412  C6   DG A  44    -110.199  28.118 -53.940  6.00  0.00           C  
ATOM   1413  O6   DG A  44    -111.331  27.743 -53.700  4.00  0.00           O  
ATOM   1414  N7   DG A  44    -110.297  30.770 -53.920  4.00  0.00           N  
ATOM   1415  C8   DG A  44    -109.325  31.605 -54.040  4.00  0.00           C  
ATOM   1416  N9   DG A  44    -108.083  31.002 -54.190  0.00  0.00           N  
ATOM   1417  OP1  DG A  44    -109.014  35.970 -51.160  9.00  0.00           O  
ATOM   1418  OP2  DG A  44    -110.203  35.535 -53.380  3.00  0.00           O1-
ATOM   1419  H1   DG A  44    -109.566  26.281 -54.060  3.00  0.00           H  
ATOM   1420  H8   DG A  44    -109.458  32.628 -53.900  8.00  0.00           H  
ATOM   1421  H1'  DG A  44    -106.145  30.852 -54.910  6.00  0.00           H  
ATOM   1422  H2'  DG A  44    -107.833  33.269 -55.440  0.00  0.00           H  
ATOM   1423  H21  DG A  44    -107.669  25.527 -55.010  4.00  0.00           H  
ATOM   1424  H3'  DG A  44    -106.019  34.820 -54.730  4.00  0.00           H  
ATOM   1425  H22  DG A  44    -106.286  26.504 -54.740  0.00  0.00           H  
ATOM   1426  H4'  DG A  44    -104.914  33.308 -52.770  3.00  0.00           H  
ATOM   1427  H5'  DG A  44    -107.289  33.245 -51.570  7.00  0.00           H  
ATOM   1428 H2''  DG A  44    -106.402  32.499 -56.310  9.00  0.00           H  
ATOM   1429 H5''  DG A  44    -106.430  34.861 -51.790  1.00  0.00           H  
ATOM   1430  P   DG3 A  45    -103.685  34.028 -56.230  7.00  0.00           P  
ATOM   1431  C5' DG3 A  45    -103.513  31.788 -57.460  8.00  0.00           C  
ATOM   1432  O5' DG3 A  45    -104.056  33.118 -57.430  8.00  0.00           O  
ATOM   1433  C4' DG3 A  45    -104.323  30.727 -58.230  3.00  0.00           C  
ATOM   1434  O4' DG3 A  45    -105.687  30.565 -57.780  3.00  0.00           O  
ATOM   1435  C3' DG3 A  45    -104.404  31.037 -59.770  2.00  0.00           C  
ATOM   1436  O3' DG3 A  45    -103.954  29.971 -60.550  0.00  0.00           O  
ATOM   1437  C2' DG3 A  45    -105.937  31.253 -60.030  5.00  0.00           C  
ATOM   1438  C1' DG3 A  45    -106.476  30.358 -58.970  8.00  0.00           C  
ATOM   1439  N1  DG3 A  45    -110.831  28.354 -57.140  0.00  0.00           N  
ATOM   1440  C2  DG3 A  45    -109.704  27.689 -57.580  0.00  0.00           C  
ATOM   1441  N2  DG3 A  45    -109.656  26.417 -57.410  5.00  0.00           N  
ATOM   1442  N3  DG3 A  45    -108.640  28.362 -58.040  4.00  0.00           N  
ATOM   1443  C4  DG3 A  45    -108.797  29.682 -58.080  1.00  0.00           C  
ATOM   1444  C5  DG3 A  45    -109.934  30.427 -57.680  5.00  0.00           C  
ATOM   1445  C6  DG3 A  45    -111.022  29.695 -57.150  2.00  0.00           C  
ATOM   1446  O6  DG3 A  45    -112.119  30.024 -56.870  5.00  0.00           O  
ATOM   1447  N7  DG3 A  45    -109.670  31.816 -57.780  1.00  0.00           N  
ATOM   1448  C8  DG3 A  45    -108.446  31.892 -58.250  7.00  0.00           C  
ATOM   1449  N9  DG3 A  45    -107.901  30.646 -58.510  6.00  0.00           N  
ATOM   1450  OP1 DG3 A  45    -102.235  33.860 -55.910  8.00  0.00           O  
ATOM   1451  OP2 DG3 A  45    -104.209  35.382 -56.480  2.00  0.00           O  
ATOM   1452 HO3' DG3 A  45    -103.576  30.371 -61.310  8.00  0.00           H  
ATOM   1453  H1  DG3 A  45    -111.621  27.766 -56.880  4.00  0.00           H  
ATOM   1454  H8  DG3 A  45    -107.933  32.886 -58.520  1.00  0.00           H  
ATOM   1455  H1' DG3 A  45    -106.324  29.232 -59.310  9.00  0.00           H  
ATOM   1456  H2' DG3 A  45    -106.247  32.319 -59.760  5.00  0.00           H  
ATOM   1457  H21 DG3 A  45    -110.391  25.844 -57.180  8.00  0.00           H  
ATOM   1458  H3' DG3 A  45    -103.904  31.957 -59.920  7.00  0.00           H  
ATOM   1459  H22 DG3 A  45    -108.895  25.957 -57.880  7.00  0.00           H  
ATOM   1460  H4' DG3 A  45    -103.754  29.793 -57.990  5.00  0.00           H  
ATOM   1461  H5' DG3 A  45    -103.351  31.399 -56.410  8.00  0.00           H  
ATOM   1462 H2'' DG3 A  45    -106.292  31.064 -61.010  8.00  0.00           H  
ATOM   1463 H5'' DG3 A  45    -102.537  31.794 -57.800  7.00  0.00           H  
ATOM   1464  C5' DC5 A  46    -114.717  20.275 -58.980  3.00  0.00           C  
ATOM   1465  O5' DC5 A  46    -115.987  20.965 -58.700  4.00  0.00           O  
ATOM   1466  C4' DC5 A  46    -113.557  20.816 -58.090  2.00  0.00           C  
ATOM   1467  O4' DC5 A  46    -113.501  22.256 -58.030  1.00  0.00           O  
ATOM   1468  C3' DC5 A  46    -113.746  20.293 -56.630  1.00  0.00           C  
ATOM   1469  O3' DC5 A  46    -112.549  19.822 -56.060  4.00  0.00           O  
ATOM   1470  C2' DC5 A  46    -114.137  21.592 -55.940  9.00  0.00           C  
ATOM   1471  C1' DC5 A  46    -113.300  22.604 -56.660  9.00  0.00           C  
ATOM   1472  N1  DC5 A  46    -113.584  24.023 -56.510  1.00  0.00           N  
ATOM   1473  C2  DC5 A  46    -112.523  24.946 -56.740  7.00  0.00           C  
ATOM   1474  O2  DC5 A  46    -111.518  24.571 -57.220  2.00  0.00           O  
ATOM   1475  N3  DC5 A  46    -112.693  26.298 -56.640  8.00  0.00           N  
ATOM   1476  C4  DC5 A  46    -113.852  26.694 -56.180  9.00  0.00           C  
ATOM   1477  N4  DC5 A  46    -114.061  27.975 -56.210  7.00  0.00           N  
ATOM   1478  C5  DC5 A  46    -114.946  25.865 -55.950  0.00  0.00           C  
ATOM   1479  C6  DC5 A  46    -114.796  24.516 -56.190  1.00  0.00           C  
ATOM   1480 HO5' DC5 A  46    -116.472  20.358 -58.090  8.00  0.00           H  
ATOM   1481  H5  DC5 A  46    -115.892  26.247 -55.570  5.00  0.00           H  
ATOM   1482  H6  DC5 A  46    -115.677  23.831 -56.070  1.00  0.00           H  
ATOM   1483  H1' DC5 A  46    -112.267  22.426 -56.470  9.00  0.00           H  
ATOM   1484  H2' DC5 A  46    -115.162  21.752 -55.940  3.00  0.00           H  
ATOM   1485  H3' DC5 A  46    -114.551  19.586 -56.530  3.00  0.00           H  
ATOM   1486  H4' DC5 A  46    -112.636  20.358 -58.470  8.00  0.00           H  
ATOM   1487  H41 DC5 A  46    -113.400  28.652 -56.560  2.00  0.00           H  
ATOM   1488  H5' DC5 A  46    -114.383  20.506 -59.990  8.00  0.00           H  
ATOM   1489  H42 DC5 A  46    -114.942  28.340 -55.930  1.00  0.00           H  
ATOM   1490 H2'' DC5 A  46    -113.770  21.644 -54.910  8.00  0.00           H  
ATOM   1491 H5'' DC5 A  46    -114.836  19.234 -58.740  8.00  0.00           H  
ATOM   1492  P    DC A  47    -112.356  18.169 -55.840  7.00  0.00           P  
ATOM   1493  C5'  DC A  47    -110.142  18.610 -57.400  8.00  0.00           C  
ATOM   1494  O5'  DC A  47    -110.800  18.191 -56.180  0.00  0.00           O  
ATOM   1495  C4'  DC A  47    -108.809  19.326 -57.090  8.00  0.00           C  
ATOM   1496  O4'  DC A  47    -109.016  20.737 -56.730  6.00  0.00           O  
ATOM   1497  C3'  DC A  47    -107.817  18.853 -56.000  8.00  0.00           C  
ATOM   1498  O3'  DC A  47    -106.569  19.032 -56.580  9.00  0.00           O  
ATOM   1499  C2'  DC A  47    -108.161  19.726 -54.780  9.00  0.00           C  
ATOM   1500  C1'  DC A  47    -108.402  21.043 -55.520  7.00  0.00           C  
ATOM   1501  N1   DC A  47    -109.257  21.983 -54.770  1.00  0.00           N  
ATOM   1502  C2   DC A  47    -108.913  23.342 -54.730  3.00  0.00           C  
ATOM   1503  O2   DC A  47    -107.918  23.753 -55.280  4.00  0.00           O  
ATOM   1504  N3   DC A  47    -109.787  24.276 -54.220  4.00  0.00           N  
ATOM   1505  C4   DC A  47    -110.928  23.868 -53.700  1.00  0.00           C  
ATOM   1506  N4   DC A  47    -111.744  24.850 -53.300  7.00  0.00           N  
ATOM   1507  C5   DC A  47    -111.304  22.515 -53.660  4.00  0.00           C  
ATOM   1508  C6   DC A  47    -110.485  21.593 -54.250  7.00  0.00           C  
ATOM   1509  OP1  DC A  47    -113.203  17.385 -56.770  7.00  0.00           O  
ATOM   1510  OP2  DC A  47    -112.574  17.930 -54.380  9.00  0.00           O1-
ATOM   1511  H5   DC A  47    -112.262  22.164 -53.260  1.00  0.00           H  
ATOM   1512  H6   DC A  47    -110.782  20.548 -54.290  7.00  0.00           H  
ATOM   1513  H1'  DC A  47    -107.367  21.385 -55.760  5.00  0.00           H  
ATOM   1514  H2'  DC A  47    -108.954  19.368 -54.140  2.00  0.00           H  
ATOM   1515  H3'  DC A  47    -108.069  17.834 -55.780  4.00  0.00           H  
ATOM   1516  H4'  DC A  47    -108.253  19.375 -58.060  4.00  0.00           H  
ATOM   1517  H41  DC A  47    -111.516  25.830 -53.440  6.00  0.00           H  
ATOM   1518  H5'  DC A  47    -110.747  19.285 -58.010  7.00  0.00           H  
ATOM   1519  H42  DC A  47    -112.375  24.611 -52.590  6.00  0.00           H  
ATOM   1520 H2''  DC A  47    -107.250  19.787 -54.190  1.00  0.00           H  
ATOM   1521 H5''  DC A  47    -110.081  17.827 -58.160  5.00  0.00           H  
ATOM   1522  P    DC A  48    -105.301  18.379 -55.820  4.00  0.00           P  
ATOM   1523  C5'  DC A  48    -103.711  20.466 -55.630  4.00  0.00           C  
ATOM   1524  O5'  DC A  48    -104.606  19.583 -55.040  5.00  0.00           O  
ATOM   1525  C4'  DC A  48    -103.568  21.753 -54.800  9.00  0.00           C  
ATOM   1526  O4'  DC A  48    -104.840  22.179 -54.270  1.00  0.00           O  
ATOM   1527  C3'  DC A  48    -102.609  21.527 -53.610  1.00  0.00           C  
ATOM   1528  O3'  DC A  48    -101.746  22.659 -53.460  2.00  0.00           O  
ATOM   1529  C2'  DC A  48    -103.656  21.400 -52.470  8.00  0.00           C  
ATOM   1530  C1'  DC A  48    -104.737  22.440 -52.920  2.00  0.00           C  
ATOM   1531  N1   DC A  48    -106.031  22.443 -52.140  0.00  0.00           N  
ATOM   1532  C2   DC A  48    -106.460  23.664 -51.570  5.00  0.00           C  
ATOM   1533  O2   DC A  48    -105.728  24.626 -51.570  7.00  0.00           O  
ATOM   1534  N3   DC A  48    -107.739  23.772 -51.130  3.00  0.00           N  
ATOM   1535  C4   DC A  48    -108.445  22.724 -51.020  7.00  0.00           C  
ATOM   1536  N4   DC A  48    -109.640  22.823 -50.430  9.00  0.00           N  
ATOM   1537  C5   DC A  48    -107.975  21.420 -51.360  7.00  0.00           C  
ATOM   1538  C6   DC A  48    -106.709  21.272 -51.880  4.00  0.00           C  
ATOM   1539  OP1  DC A  48    -104.364  17.870 -56.830  5.00  0.00           O  
ATOM   1540  OP2  DC A  48    -105.718  17.356 -54.840  4.00  0.00           O1-
ATOM   1541  H5   DC A  48    -108.564  20.519 -51.320  9.00  0.00           H  
ATOM   1542  H6   DC A  48    -106.194  20.275 -52.130  0.00  0.00           H  
ATOM   1543  H1'  DC A  48    -104.347  23.484 -52.880  9.00  0.00           H  
ATOM   1544  H2'  DC A  48    -103.978  20.403 -52.420  6.00  0.00           H  
ATOM   1545  H3'  DC A  48    -102.083  20.595 -53.770  1.00  0.00           H  
ATOM   1546  H4'  DC A  48    -103.151  22.463 -55.440  7.00  0.00           H  
ATOM   1547  H41  DC A  48    -109.970  23.766 -50.350  9.00  0.00           H  
ATOM   1548  H5'  DC A  48    -103.968  20.694 -56.640  2.00  0.00           H  
ATOM   1549  H42  DC A  48    -110.120  21.947 -50.430  3.00  0.00           H  
ATOM   1550 H2''  DC A  48    -103.240  21.737 -51.540  5.00  0.00           H  
ATOM   1551 H5''  DC A  48    -102.800  20.035 -55.750  9.00  0.00           H  
ATOM   1552  P    DT A  49    -100.459  22.678 -52.550  8.00  0.00           P  
ATOM   1553  C5'  DT A  49    -100.520  25.235 -52.370  4.00  0.00           C  
ATOM   1554  O5'  DT A  49    -100.592  23.936 -51.770  5.00  0.00           O  
ATOM   1555  C4'  DT A  49    -100.503  26.357 -51.340  0.00  0.00           C  
ATOM   1556  O4'  DT A  49    -101.819  26.457 -50.830  5.00  0.00           O  
ATOM   1557  C3'  DT A  49     -99.535  26.168 -50.120  8.00  0.00           C  
ATOM   1558  O3'  DT A  49     -99.106  27.477 -49.620  9.00  0.00           O  
ATOM   1559  C2'  DT A  49    -100.428  25.482 -49.130  8.00  0.00           C  
ATOM   1560  C1'  DT A  49    -101.748  26.206 -49.380  7.00  0.00           C  
ATOM   1561  N1   DT A  49    -103.018  25.527 -48.920  7.00  0.00           N  
ATOM   1562  C2   DT A  49    -104.155  26.309 -48.650  7.00  0.00           C  
ATOM   1563  O2   DT A  49    -104.129  27.562 -48.650  0.00  0.00           O  
ATOM   1564  N3   DT A  49    -105.330  25.741 -48.260  4.00  0.00           N  
ATOM   1565  C4   DT A  49    -105.449  24.353 -48.150  7.00  0.00           C  
ATOM   1566  O4   DT A  49    -106.501  23.934 -47.790  4.00  0.00           O  
ATOM   1567  C5   DT A  49    -104.293  23.546 -48.580  0.00  0.00           C  
ATOM   1568  C6   DT A  49    -103.048  24.153 -48.850  7.00  0.00           C  
ATOM   1569  C7   DT A  49    -104.271  22.040 -48.490  2.00  0.00           C  
ATOM   1570  OP1  DT A  49     -99.290  22.783 -53.490  0.00  0.00           O  
ATOM   1571  OP2  DT A  49    -100.615  21.529 -51.660  2.00  0.00           O1-
ATOM   1572  H3   DT A  49    -106.079  26.336 -47.880  2.00  0.00           H  
ATOM   1573  H6   DT A  49    -102.317  23.546 -49.260  8.00  0.00           H  
ATOM   1574  H1'  DT A  49    -101.751  27.265 -48.960  8.00  0.00           H  
ATOM   1575  H2'  DT A  49    -100.380  24.402 -49.230  0.00  0.00           H  
ATOM   1576  H3'  DT A  49     -98.634  25.567 -50.360  5.00  0.00           H  
ATOM   1577  H4'  DT A  49    -100.222  27.312 -51.810  3.00  0.00           H  
ATOM   1578  H5'  DT A  49    -101.371  25.368 -53.030  7.00  0.00           H  
ATOM   1579  H71  DT A  49    -103.247  21.531 -48.490  6.00  0.00           H  
ATOM   1580  H72  DT A  49    -104.741  21.777 -47.580  8.00  0.00           H  
ATOM   1581  H73  DT A  49    -104.830  21.513 -49.280  9.00  0.00           H  
ATOM   1582 H2''  DT A  49    -100.117  25.738 -48.100  7.00  0.00           H  
ATOM   1583 H5''  DT A  49     -99.619  25.315 -53.000  4.00  0.00           H  
ATOM   1584  P    DA A  50     -98.139  27.727 -48.350  8.00  0.00           P  
ATOM   1585  C5'  DA A  50    -100.207  28.916 -47.090  0.00  0.00           C  
ATOM   1586  O5'  DA A  50     -99.205  27.870 -47.120  5.00  0.00           O  
ATOM   1587  C4'  DA A  50    -101.313  28.665 -46.000  9.00  0.00           C  
ATOM   1588  O4'  DA A  50    -102.118  27.464 -46.180  3.00  0.00           O  
ATOM   1589  C3'  DA A  50    -100.807  28.592 -44.600  2.00  0.00           C  
ATOM   1590  O3'  DA A  50    -101.747  29.294 -43.710  8.00  0.00           O  
ATOM   1591  C2'  DA A  50    -100.874  27.131 -44.220  3.00  0.00           C  
ATOM   1592  C1'  DA A  50    -102.267  26.938 -44.820  8.00  0.00           C  
ATOM   1593  N1   DA A  50    -106.428  24.133 -44.580  0.00  0.00           N  
ATOM   1594  C2   DA A  50    -106.245  25.430 -44.660  9.00  0.00           C  
ATOM   1595  N3   DA A  50    -105.066  26.055 -44.760  4.00  0.00           N  
ATOM   1596  C4   DA A  50    -104.036  25.148 -44.720  2.00  0.00           C  
ATOM   1597  C5   DA A  50    -104.076  23.818 -44.640  3.00  0.00           C  
ATOM   1598  C6   DA A  50    -105.410  23.302 -44.650  9.00  0.00           C  
ATOM   1599  N6   DA A  50    -105.688  22.040 -44.430  1.00  0.00           N  
ATOM   1600  N7   DA A  50    -102.783  23.318 -44.660  1.00  0.00           N  
ATOM   1601  C8   DA A  50    -101.999  24.332 -44.660  8.00  0.00           C  
ATOM   1602  N9   DA A  50    -102.699  25.516 -44.780  2.00  0.00           N  
ATOM   1603  OP1  DA A  50     -97.563  29.053 -48.430  2.00  0.00           O  
ATOM   1604  OP2  DA A  50     -97.253  26.602 -48.240  9.00  0.00           O1-
ATOM   1605  H2   DA A  50    -107.109  26.091 -44.680  4.00  0.00           H  
ATOM   1606  H8   DA A  50    -100.941  24.280 -44.640  4.00  0.00           H  
ATOM   1607  H1'  DA A  50    -103.025  27.474 -44.300  1.00  0.00           H  
ATOM   1608  H2'  DA A  50    -100.174  26.423 -44.690  1.00  0.00           H  
ATOM   1609  H3'  DA A  50     -99.780  28.995 -44.500  1.00  0.00           H  
ATOM   1610  H4'  DA A  50    -102.048  29.578 -46.070  4.00  0.00           H  
ATOM   1611  H5'  DA A  50    -100.772  28.973 -48.070  8.00  0.00           H  
ATOM   1612  H61  DA A  50    -106.661  21.798 -44.300  5.00  0.00           H  
ATOM   1613  H62  DA A  50    -105.047  21.293 -44.440  5.00  0.00           H  
ATOM   1614 H2''  DA A  50    -101.052  26.964 -43.220  5.00  0.00           H  
ATOM   1615 H5''  DA A  50     -99.702  29.802 -46.800  1.00  0.00           H  
ATOM   1616  P    DA A  51    -101.305  30.129 -42.490  8.00  0.00           P  
ATOM   1617  C5'  DA A  51    -103.715  31.256 -42.690  6.00  0.00           C  
ATOM   1618  O5'  DA A  51    -102.783  30.556 -41.890  2.00  0.00           O  
ATOM   1619  C4'  DA A  51    -105.141  31.422 -42.240  9.00  0.00           C  
ATOM   1620  O4'  DA A  51    -105.825  30.173 -42.380  7.00  0.00           O  
ATOM   1621  C3'  DA A  51    -105.286  31.931 -40.820  0.00  0.00           C  
ATOM   1622  O3'  DA A  51    -106.561  32.519 -40.740  7.00  0.00           O  
ATOM   1623  C2'  DA A  51    -105.308  30.571 -40.080  3.00  0.00           C  
ATOM   1624  C1'  DA A  51    -105.927  29.564 -41.130  1.00  0.00           C  
ATOM   1625  N1   DA A  51    -107.275  24.590 -40.990  4.00  0.00           N  
ATOM   1626  C2   DA A  51    -107.913  25.746 -41.000  1.00  0.00           C  
ATOM   1627  N3   DA A  51    -107.474  26.990 -41.040  6.00  0.00           N  
ATOM   1628  C4   DA A  51    -106.125  27.034 -41.160  4.00  0.00           C  
ATOM   1629  C5   DA A  51    -105.310  25.923 -41.160  9.00  0.00           C  
ATOM   1630  C6   DA A  51    -105.959  24.689 -41.110  9.00  0.00           C  
ATOM   1631  N6   DA A  51    -105.426  23.498 -41.250  8.00  0.00           N  
ATOM   1632  N7   DA A  51    -103.963  26.400 -41.180  3.00  0.00           N  
ATOM   1633  C8   DA A  51    -104.056  27.734 -41.290  8.00  0.00           C  
ATOM   1634  N9   DA A  51    -105.381  28.181 -41.220  7.00  0.00           N  
ATOM   1635  OP1  DA A  51    -100.576  31.336 -43.000  4.00  0.00           O  
ATOM   1636  OP2  DA A  51    -100.643  29.274 -41.490  8.00  0.00           O1-
ATOM   1637  H2   DA A  51    -109.028  25.709 -40.980  7.00  0.00           H  
ATOM   1638  H8   DA A  51    -103.169  28.365 -41.410  7.00  0.00           H  
ATOM   1639  H1'  DA A  51    -107.017  29.626 -40.910  1.00  0.00           H  
ATOM   1640  H2'  DA A  51    -104.307  30.289 -39.990  4.00  0.00           H  
ATOM   1641  H3'  DA A  51    -104.484  32.597 -40.480  2.00  0.00           H  
ATOM   1642  H4'  DA A  51    -105.487  32.180 -42.960  5.00  0.00           H  
ATOM   1643  H5'  DA A  51    -103.852  30.791 -43.660  8.00  0.00           H  
ATOM   1644  H61  DA A  51    -106.003  22.633 -41.340  5.00  0.00           H  
ATOM   1645  H62  DA A  51    -104.404  23.388 -41.000  8.00  0.00           H  
ATOM   1646 H2''  DA A  51    -105.833  30.590 -39.060  7.00  0.00           H  
ATOM   1647 H5''  DA A  51    -103.233  32.204 -42.800  4.00  0.00           H  
ATOM   1648  P    DC A  52    -107.047  33.316 -39.490  1.00  0.00           P  
ATOM   1649  C5'  DC A  52    -108.913  31.648 -38.560  0.00  0.00           C  
ATOM   1650  O5'  DC A  52    -107.575  32.236 -38.410  5.00  0.00           O  
ATOM   1651  C4'  DC A  52    -108.930  30.278 -37.770  8.00  0.00           C  
ATOM   1652  O4'  DC A  52    -108.018  29.319 -38.350  4.00  0.00           O  
ATOM   1653  C3'  DC A  52    -108.422  30.421 -36.310  7.00  0.00           C  
ATOM   1654  O3'  DC A  52    -109.369  29.807 -35.390  8.00  0.00           O  
ATOM   1655  C2'  DC A  52    -107.113  29.541 -36.240  9.00  0.00           C  
ATOM   1656  C1'  DC A  52    -107.607  28.489 -37.260  1.00  0.00           C  
ATOM   1657  N1   DC A  52    -106.629  27.431 -37.720  8.00  0.00           N  
ATOM   1658  C2   DC A  52    -106.937  26.031 -37.660  9.00  0.00           C  
ATOM   1659  O2   DC A  52    -108.120  25.733 -37.490  3.00  0.00           O  
ATOM   1660  N3   DC A  52    -106.046  25.030 -37.700  2.00  0.00           N  
ATOM   1661  C4   DC A  52    -104.799  25.443 -37.730  9.00  0.00           C  
ATOM   1662  N4   DC A  52    -103.930  24.541 -37.940  2.00  0.00           N  
ATOM   1663  C5   DC A  52    -104.358  26.803 -37.790  1.00  0.00           C  
ATOM   1664  C6   DC A  52    -105.313  27.799 -37.820  8.00  0.00           C  
ATOM   1665  OP1  DC A  52    -108.109  34.218 -39.880  8.00  0.00           O  
ATOM   1666  OP2  DC A  52    -105.853  33.968 -38.930  2.00  0.00           O1-
ATOM   1667  H5   DC A  52    -103.340  27.178 -37.850  2.00  0.00           H  
ATOM   1668  H6   DC A  52    -104.974  28.835 -37.750  9.00  0.00           H  
ATOM   1669  H1'  DC A  52    -108.461  28.001 -36.840  1.00  0.00           H  
ATOM   1670  H2'  DC A  52    -106.254  30.119 -36.600  0.00  0.00           H  
ATOM   1671  H3'  DC A  52    -108.282  31.461 -36.220  8.00  0.00           H  
ATOM   1672  H4'  DC A  52    -109.927  29.953 -37.770  9.00  0.00           H  
ATOM   1673  H41  DC A  52    -104.289  23.594 -38.090  7.00  0.00           H  
ATOM   1674  H5'  DC A  52    -109.167  31.512 -39.600  3.00  0.00           H  
ATOM   1675  H42  DC A  52    -102.992  24.739 -37.910  4.00  0.00           H  
ATOM   1676 H2''  DC A  52    -107.019  29.082 -35.270  6.00  0.00           H  
ATOM   1677 H5''  DC A  52    -109.639  32.359 -38.140  3.00  0.00           H  
ATOM   1678  P    DC A  53    -109.507  30.330 -33.920  5.00  0.00           P  
ATOM   1679  C5'  DC A  53    -108.724  28.407 -32.210  6.00  0.00           C  
ATOM   1680  O5'  DC A  53    -108.485  29.479 -33.150  8.00  0.00           O  
ATOM   1681  C4'  DC A  53    -109.280  27.097 -32.810  9.00  0.00           C  
ATOM   1682  O4'  DC A  53    -108.533  26.589 -33.870  7.00  0.00           O  
ATOM   1683  C3'  DC A  53    -109.222  25.990 -31.790  9.00  0.00           C  
ATOM   1684  O3'  DC A  53    -110.102  24.931 -32.060  9.00  0.00           O  
ATOM   1685  C2'  DC A  53    -107.819  25.503 -31.970  9.00  0.00           C  
ATOM   1686  C1'  DC A  53    -107.780  25.500 -33.490  0.00  0.00           C  
ATOM   1687  N1   DC A  53    -106.397  25.550 -34.000  0.00  0.00           N  
ATOM   1688  C2   DC A  53    -105.833  24.315 -34.370  6.00  0.00           C  
ATOM   1689  O2   DC A  53    -106.439  23.282 -34.430  9.00  0.00           O  
ATOM   1690  N3   DC A  53    -104.530  24.233 -34.730  7.00  0.00           N  
ATOM   1691  C4   DC A  53    -103.875  25.365 -34.770  1.00  0.00           C  
ATOM   1692  N4   DC A  53    -102.659  25.263 -35.110  5.00  0.00           N  
ATOM   1693  C5   DC A  53    -104.367  26.614 -34.450  7.00  0.00           C  
ATOM   1694  C6   DC A  53    -105.664  26.651 -34.020  2.00  0.00           C  
ATOM   1695  OP1  DC A  53    -110.892  29.971 -33.440  1.00  0.00           O  
ATOM   1696  OP2  DC A  53    -109.174  31.798 -33.850  3.00  0.00           O1-
ATOM   1697  H5   DC A  53    -103.767  27.521 -34.590  9.00  0.00           H  
ATOM   1698  H6   DC A  53    -106.081  27.580 -33.750  8.00  0.00           H  
ATOM   1699  H1'  DC A  53    -108.285  24.584 -33.900  9.00  0.00           H  
ATOM   1700  H2'  DC A  53    -107.123  26.215 -31.610  9.00  0.00           H  
ATOM   1701  H3'  DC A  53    -109.409  26.325 -30.830  1.00  0.00           H  
ATOM   1702  H4'  DC A  53    -110.308  27.318 -33.090  9.00  0.00           H  
ATOM   1703  H41  DC A  53    -102.403  24.290 -35.390  7.00  0.00           H  
ATOM   1704  H5'  DC A  53    -109.468  28.757 -31.550  1.00  0.00           H  
ATOM   1705  H42  DC A  53    -102.123  26.154 -35.280  7.00  0.00           H  
ATOM   1706 H2''  DC A  53    -107.646  24.556 -31.480  5.00  0.00           H  
ATOM   1707 H5''  DC A  53    -107.813  28.189 -31.720  6.00  0.00           H  
ATOM   1708  P    DC A  54    -110.563  23.791 -31.130  5.00  0.00           P  
ATOM   1709  C5'  DC A  54    -108.980  22.092 -30.070  9.00  0.00           C  
ATOM   1710  O5'  DC A  54    -109.456  22.676 -31.200  8.00  0.00           O  
ATOM   1711  C4'  DC A  54    -107.923  20.992 -30.490  4.00  0.00           C  
ATOM   1712  O4'  DC A  54    -106.810  21.690 -31.110  1.00  0.00           O  
ATOM   1713  C3'  DC A  54    -107.283  20.226 -29.370  4.00  0.00           C  
ATOM   1714  O3'  DC A  54    -107.263  18.830 -29.600  2.00  0.00           O  
ATOM   1715  C2'  DC A  54    -105.872  20.674 -29.290  9.00  0.00           C  
ATOM   1716  C1'  DC A  54    -105.664  20.973 -30.770  7.00  0.00           C  
ATOM   1717  N1   DC A  54    -104.370  21.636 -31.130  8.00  0.00           N  
ATOM   1718  C2   DC A  54    -103.317  20.891 -31.550  6.00  0.00           C  
ATOM   1719  O2   DC A  54    -103.361  19.639 -31.490  8.00  0.00           O  
ATOM   1720  N3   DC A  54    -102.139  21.451 -32.050  6.00  0.00           N  
ATOM   1721  C4   DC A  54    -102.028  22.681 -32.150  3.00  0.00           C  
ATOM   1722  N4   DC A  54    -100.930  23.201 -32.520  1.00  0.00           N  
ATOM   1723  C5   DC A  54    -103.090  23.562 -31.740  7.00  0.00           C  
ATOM   1724  C6   DC A  54    -104.253  23.015 -31.290  6.00  0.00           C  
ATOM   1725  OP1  DC A  54    -111.781  23.181 -31.750  9.00  0.00           O  
ATOM   1726  OP2  DC A  54    -110.674  24.385 -29.790  9.00  0.00           O1-
ATOM   1727  H5   DC A  54    -103.030  24.673 -31.820  7.00  0.00           H  
ATOM   1728  H6   DC A  54    -105.043  23.643 -30.990  7.00  0.00           H  
ATOM   1729  H1'  DC A  54    -105.731  20.063 -31.360  9.00  0.00           H  
ATOM   1730  H2'  DC A  54    -105.886  21.567 -28.710  3.00  0.00           H  
ATOM   1731  H3'  DC A  54    -107.704  20.582 -28.420  6.00  0.00           H  
ATOM   1732  H4'  DC A  54    -108.396  20.302 -31.240  3.00  0.00           H  
ATOM   1733  H41  DC A  54    -100.075  22.701 -32.630  5.00  0.00           H  
ATOM   1734  H5'  DC A  54    -109.722  21.711 -29.470  4.00  0.00           H  
ATOM   1735  H42  DC A  54    -100.827  24.191 -32.560  4.00  0.00           H  
ATOM   1736 H2''  DC A  54    -105.167  19.901 -28.890  4.00  0.00           H  
ATOM   1737 H5''  DC A  54    -108.391  22.833 -29.430  9.00  0.00           H  
ATOM   1738  P    DT A  55    -108.498  17.926 -29.400  6.00  0.00           P  
ATOM   1739  C5'  DT A  55    -107.576  16.054 -27.860  3.00  0.00           C  
ATOM   1740  O5'  DT A  55    -108.010  16.487 -29.150  0.00  0.00           O  
ATOM   1741  C4'  DT A  55    -106.122  15.623 -27.910  3.00  0.00           C  
ATOM   1742  O4'  DT A  55    -105.256  16.469 -28.600  3.00  0.00           O  
ATOM   1743  C3'  DT A  55    -105.468  15.342 -26.560  1.00  0.00           C  
ATOM   1744  O3'  DT A  55    -105.746  13.933 -26.240  7.00  0.00           O  
ATOM   1745  C2'  DT A  55    -104.040  15.758 -26.780  5.00  0.00           C  
ATOM   1746  C1'  DT A  55    -103.926  16.088 -28.260  4.00  0.00           C  
ATOM   1747  N1   DT A  55    -102.965  17.206 -28.450  4.00  0.00           N  
ATOM   1748  C2   DT A  55    -101.857  16.949 -29.260  9.00  0.00           C  
ATOM   1749  O2   DT A  55    -101.623  15.781 -29.570  9.00  0.00           O  
ATOM   1750  N3   DT A  55    -100.983  17.934 -29.460  5.00  0.00           N  
ATOM   1751  C4   DT A  55    -101.232  19.251 -29.050  3.00  0.00           C  
ATOM   1752  O4   DT A  55    -100.486  20.136 -29.420  1.00  0.00           O  
ATOM   1753  C5   DT A  55    -102.366  19.455 -28.190  5.00  0.00           C  
ATOM   1754  C6   DT A  55    -103.174  18.428 -27.870  5.00  0.00           C  
ATOM   1755  C7   DT A  55    -102.688  20.833 -27.670  4.00  0.00           C  
ATOM   1756  OP1  DT A  55    -109.304  17.902 -30.660  1.00  0.00           O  
ATOM   1757  OP2  DT A  55    -109.172  18.342 -28.140  6.00  0.00           O1-
ATOM   1758  H3   DT A  55    -100.360  17.747 -30.150  1.00  0.00           H  
ATOM   1759  H6   DT A  55    -104.078  18.561 -27.230  5.00  0.00           H  
ATOM   1760  H1'  DT A  55    -103.734  15.174 -28.900  3.00  0.00           H  
ATOM   1761  H2'  DT A  55    -103.768  16.632 -26.210  9.00  0.00           H  
ATOM   1762  H3'  DT A  55    -105.889  16.006 -25.800  3.00  0.00           H  
ATOM   1763  H4'  DT A  55    -106.180  14.698 -28.490  3.00  0.00           H  
ATOM   1764  H5'  DT A  55    -108.167  15.202 -27.720  9.00  0.00           H  
ATOM   1765  H71  DT A  55    -101.777  21.462 -27.570  1.00  0.00           H  
ATOM   1766  H72  DT A  55    -103.279  21.325 -28.480  5.00  0.00           H  
ATOM   1767  H73  DT A  55    -103.333  20.855 -26.790  6.00  0.00           H  
ATOM   1768 H2''  DT A  55    -103.416  14.900 -26.550  9.00  0.00           H  
ATOM   1769 H5''  DT A  55    -107.811  16.723 -27.050  5.00  0.00           H  
ATOM   1770  P    DA A  56    -105.435  13.349 -24.830  2.00  0.00           P  
ATOM   1771  C5'  DA A  56    -103.507  11.893 -25.880  8.00  0.00           C  
ATOM   1772  O5'  DA A  56    -103.876  12.902 -24.980  7.00  0.00           O  
ATOM   1773  C4'  DA A  56    -101.912  11.814 -25.990  0.00  0.00           C  
ATOM   1774  O4'  DA A  56    -101.369  13.148 -26.310  7.00  0.00           O  
ATOM   1775  C3'  DA A  56    -101.143  11.190 -24.760  6.00  0.00           C  
ATOM   1776  O3'  DA A  56    -100.323  10.168 -25.220  6.00  0.00           O  
ATOM   1777  C2'  DA A  56    -100.504  12.450 -24.160  5.00  0.00           C  
ATOM   1778  C1'  DA A  56    -100.261  13.356 -25.390  9.00  0.00           C  
ATOM   1779  N1   DA A  56     -98.764  17.951 -26.970  5.00  0.00           N  
ATOM   1780  C2   DA A  56     -98.367  16.729 -27.250  8.00  0.00           C  
ATOM   1781  N3   DA A  56     -98.627  15.570 -26.640  5.00  0.00           N  
ATOM   1782  C4   DA A  56     -99.588  15.755 -25.730  8.00  0.00           C  
ATOM   1783  C5   DA A  56    -100.142  16.969 -25.320  3.00  0.00           C  
ATOM   1784  C6   DA A  56     -99.602  18.048 -25.960  4.00  0.00           C  
ATOM   1785  N6   DA A  56    -100.002  19.274 -25.810  5.00  0.00           N  
ATOM   1786  N7   DA A  56    -101.224  16.776 -24.470  4.00  0.00           N  
ATOM   1787  C8   DA A  56    -101.257  15.483 -24.340  0.00  0.00           C  
ATOM   1788  N9   DA A  56    -100.320  14.793 -25.080  6.00  0.00           N  
ATOM   1789  OP1  DA A  56    -106.218  12.102 -24.670  2.00  0.00           O  
ATOM   1790  OP2  DA A  56    -105.512  14.358 -23.770  3.00  0.00           O1-
ATOM   1791  H2   DA A  56     -97.586  16.644 -27.920  6.00  0.00           H  
ATOM   1792  H8   DA A  56    -101.871  14.952 -23.590  3.00  0.00           H  
ATOM   1793  H1'  DA A  56     -99.294  12.987 -25.870  9.00  0.00           H  
ATOM   1794  H2'  DA A  56    -101.149  12.978 -23.500  8.00  0.00           H  
ATOM   1795  H3'  DA A  56    -101.908  10.844 -24.100  7.00  0.00           H  
ATOM   1796  H4'  DA A  56    -101.739  11.184 -26.810  0.00  0.00           H  
ATOM   1797  H5'  DA A  56    -103.854  12.111 -26.870  2.00  0.00           H  
ATOM   1798  H61  DA A  56     -99.428  20.061 -26.140  6.00  0.00           H  
ATOM   1799  H62  DA A  56    -100.856  19.436 -25.290  8.00  0.00           H  
ATOM   1800 H2''  DA A  56     -99.589  12.210 -23.630  2.00  0.00           H  
ATOM   1801 H5''  DA A  56    -104.064  10.940 -25.560  8.00  0.00           H  
ATOM   1802  P    DA A  57     -99.468   9.272 -24.210  1.00  0.00           P  
ATOM   1803  C5'  DA A  57     -97.079   9.834 -25.090  7.00  0.00           C  
ATOM   1804  O5'  DA A  57     -98.066   9.949 -24.020  5.00  0.00           O  
ATOM   1805  C4'  DA A  57     -95.880  10.759 -24.920  9.00  0.00           C  
ATOM   1806  O4'  DA A  57     -96.332  12.106 -25.100  5.00  0.00           O  
ATOM   1807  C3'  DA A  57     -95.117  10.607 -23.540  4.00  0.00           C  
ATOM   1808  O3'  DA A  57     -93.721  10.593 -23.800  9.00  0.00           O  
ATOM   1809  C2'  DA A  57     -95.690  11.959 -23.020  6.00  0.00           C  
ATOM   1810  C1'  DA A  57     -95.572  12.929 -24.210  0.00  0.00           C  
ATOM   1811  N1   DA A  57     -95.007  17.921 -24.960  4.00  0.00           N  
ATOM   1812  C2   DA A  57     -94.385  16.882 -25.380  9.00  0.00           C  
ATOM   1813  N3   DA A  57     -94.567  15.551 -25.240  0.00  0.00           N  
ATOM   1814  C4   DA A  57     -95.675  15.437 -24.470  4.00  0.00           C  
ATOM   1815  C5   DA A  57     -96.534  16.379 -23.930  9.00  0.00           C  
ATOM   1816  C6   DA A  57     -96.088  17.717 -24.260  3.00  0.00           C  
ATOM   1817  N6   DA A  57     -96.658  18.835 -23.830  9.00  0.00           N  
ATOM   1818  N7   DA A  57     -97.564  15.754 -23.160  5.00  0.00           N  
ATOM   1819  C8   DA A  57     -97.316  14.541 -23.150  6.00  0.00           C  
ATOM   1820  N9   DA A  57     -96.227  14.237 -24.000  6.00  0.00           N  
ATOM   1821  OP1  DA A  57     -99.230   7.960 -24.830  3.00  0.00           O  
ATOM   1822  OP2  DA A  57    -100.065   9.325 -22.890  2.00  0.00           O1-
ATOM   1823  H2   DA A  57     -93.540  17.048 -26.090  8.00  0.00           H  
ATOM   1824  H8   DA A  57     -97.879  13.842 -22.650  0.00  0.00           H  
ATOM   1825  H1'  DA A  57     -94.558  12.978 -24.520  2.00  0.00           H  
ATOM   1826  H2'  DA A  57     -96.702  11.872 -22.660  4.00  0.00           H  
ATOM   1827  H3'  DA A  57     -95.402   9.728 -22.840  0.00  0.00           H  
ATOM   1828  H4'  DA A  57     -95.263  10.594 -25.780  5.00  0.00           H  
ATOM   1829  H5'  DA A  57     -97.452  10.146 -26.120  0.00  0.00           H  
ATOM   1830  H61  DA A  57     -96.386  19.711 -24.270  1.00  0.00           H  
ATOM   1831  H62  DA A  57     -97.424  18.844 -23.130  0.00  0.00           H  
ATOM   1832 H2''  DA A  57     -95.044  12.315 -22.220  8.00  0.00           H  
ATOM   1833 H5''  DA A  57     -96.631   8.801 -25.060  5.00  0.00           H  
ATOM   1834  P   DCP A  58     -92.687  10.318 -22.730  4.00  0.00           P  
ATOM   1835  C5' DCP A  58     -91.713  12.634 -22.920  6.00  0.00           C  
ATOM   1836  O5' DCP A  58     -92.386  11.739 -22.090  7.00  0.00           O  
ATOM   1837  C4' DCP A  58     -91.022  13.677 -22.140  3.00  0.00           C  
ATOM   1838  O4' DCP A  58     -91.912  14.568 -21.440  7.00  0.00           O  
ATOM   1839  C3' DCP A  58     -89.938  13.144 -21.150  4.00  0.00           C  
ATOM   1840  O3' DCP A  58     -88.602  13.353 -21.610  7.00  0.00           O  
ATOM   1841  C2' DCP A  58     -90.246  14.018 -19.900  5.00  0.00           C  
ATOM   1842  C1' DCP A  58     -91.105  15.205 -20.480  9.00  0.00           C  
ATOM   1843  N1  DCP A  58     -91.927  15.949 -19.470  3.00  0.00           N  
ATOM   1844  C2  DCP A  58     -91.673  17.243 -19.180  2.00  0.00           C  
ATOM   1845  O2  DCP A  58     -90.737  17.853 -19.700  8.00  0.00           O  
ATOM   1846  N3  DCP A  58     -92.478  17.951 -18.350  4.00  0.00           N  
ATOM   1847  C4  DCP A  58     -93.457  17.360 -17.670  5.00  0.00           C  
ATOM   1848  N4  DCP A  58     -94.076  18.054 -16.760  3.00  0.00           N  
ATOM   1849  C5  DCP A  58     -93.741  16.027 -17.860  2.00  0.00           C  
ATOM   1850  C6  DCP A  58     -92.985  15.355 -18.780  0.00  0.00           C  
ATOM   1851  OP1 DCP A  58     -91.600   9.777 -23.630  3.00  0.00           O  
ATOM   1852  OP2 DCP A  58     -93.301   9.365 -21.750  4.00  0.00           O  
ATOM   1853  H3  DCP A  58     -92.249  18.887 -18.120  9.00  0.00           H  
ATOM   1854  H5  DCP A  58     -94.514  15.469 -17.300  0.00  0.00           H  
ATOM   1855  H6  DCP A  58     -93.177  14.288 -19.070  7.00  0.00           H  
ATOM   1856  H1' DCP A  58     -90.424  15.896 -21.030  3.00  0.00           H  
ATOM   1857  H2' DCP A  58     -90.865  13.485 -19.210  0.00  0.00           H  
ATOM   1858  H3' DCP A  58     -90.077  12.017 -21.120  1.00  0.00           H  
ATOM   1859  H4' DCP A  58     -90.564  14.283 -22.890  6.00  0.00           H  
ATOM   1860  H41 DCP A  58     -93.974  19.087 -16.830  4.00  0.00           H  
ATOM   1861  H5' DCP A  58     -92.398  12.976 -23.740  9.00  0.00           H  
ATOM   1862  H42 DCP A  58     -94.998  17.704 -16.420  8.00  0.00           H  
ATOM   1863 H2'' DCP A  58     -89.343  14.350 -19.360  6.00  0.00           H  
ATOM   1864 H5'' DCP A  58     -90.942  12.112 -23.380  0.00  0.00           H  
ATOM   1865  P   DCP A  59     -87.360  12.597 -21.110  4.00  0.00           P  
ATOM   1866  C5' DCP A  59     -86.950  13.065 -18.570  3.00  0.00           C  
ATOM   1867  O5' DCP A  59     -87.435  12.322 -19.620  3.00  0.00           O  
ATOM   1868  C4' DCP A  59     -87.173  12.443 -17.140  9.00  0.00           C  
ATOM   1869  O4' DCP A  59     -88.534  12.343 -16.900  0.00  0.00           O  
ATOM   1870  C3' DCP A  59     -86.568  11.066 -17.140  7.00  0.00           C  
ATOM   1871  O3' DCP A  59     -85.243  11.148 -16.610  1.00  0.00           O  
ATOM   1872  C2' DCP A  59     -87.547  10.335 -16.230  8.00  0.00           C  
ATOM   1873  C1' DCP A  59     -88.759  11.256 -16.060  2.00  0.00           C  
ATOM   1874  N1  DCP A  59     -90.040  10.677 -16.450  9.00  0.00           N  
ATOM   1875  C2  DCP A  59     -90.737   9.777 -15.630  0.00  0.00           C  
ATOM   1876  O2  DCP A  59     -90.385   9.721 -14.460  2.00  0.00           O  
ATOM   1877  N3  DCP A  59     -91.762   9.037 -16.030  3.00  0.00           N  
ATOM   1878  C4  DCP A  59     -92.164   9.174 -17.260  5.00  0.00           C  
ATOM   1879  N4  DCP A  59     -93.263   8.502 -17.500  7.00  0.00           N  
ATOM   1880  C5  DCP A  59     -91.433   9.830 -18.250  5.00  0.00           C  
ATOM   1881  C6  DCP A  59     -90.388  10.579 -17.810  2.00  0.00           C  
ATOM   1882  OP1 DCP A  59     -86.192  13.442 -21.450  0.00  0.00           O  
ATOM   1883  OP2 DCP A  59     -87.417  11.311 -21.770  5.00  0.00           O  
ATOM   1884  H3  DCP A  59     -92.330   8.479 -15.410  6.00  0.00           H  
ATOM   1885  H5  DCP A  59     -91.672   9.789 -19.260  3.00  0.00           H  
ATOM   1886  H6  DCP A  59     -89.765  11.206 -18.420  7.00  0.00           H  
ATOM   1887  H1' DCP A  59     -88.916  11.595 -15.000  5.00  0.00           H  
ATOM   1888  H2' DCP A  59     -87.850   9.373 -16.670  6.00  0.00           H  
ATOM   1889  H3' DCP A  59     -86.527  10.607 -18.090  0.00  0.00           H  
ATOM   1890  H4' DCP A  59     -86.627  13.118 -16.440  1.00  0.00           H  
ATOM   1891  H41 DCP A  59     -93.776   7.983 -16.770  0.00  0.00           H  
ATOM   1892  H5' DCP A  59     -87.464  14.074 -18.550  6.00  0.00           H  
ATOM   1893  H42 DCP A  59     -93.736   8.562 -18.380  9.00  0.00           H  
ATOM   1894 H2'' DCP A  59     -87.072  10.251 -15.260  9.00  0.00           H  
ATOM   1895 H5'' DCP A  59     -85.902  13.318 -18.690  7.00  0.00           H  
ATOM   1896  P   DCP A  60     -84.037  10.443 -17.360  1.00  0.00           P  
ATOM   1897  C5' DCP A  60     -83.884   8.167 -15.900  9.00  0.00           C  
ATOM   1898  O5' DCP A  60     -84.115   8.853 -17.140  8.00  0.00           O  
ATOM   1899  C4' DCP A  60     -84.183   6.635 -15.990  1.00  0.00           C  
ATOM   1900  O4' DCP A  60     -85.404   6.538 -16.740  2.00  0.00           O  
ATOM   1901  C3' DCP A  60     -83.223   5.808 -16.750  4.00  0.00           C  
ATOM   1902  O3' DCP A  60     -82.856   4.652 -15.930  5.00  0.00           O  
ATOM   1903  C2' DCP A  60     -84.050   5.334 -17.950  4.00  0.00           C  
ATOM   1904  C1' DCP A  60     -85.408   5.239 -17.320  5.00  0.00           C  
ATOM   1905  N1  DCP A  60     -86.589   4.765 -18.100  7.00  0.00           N  
ATOM   1906  C2  DCP A  60     -87.523   4.060 -17.350  5.00  0.00           C  
ATOM   1907  O2  DCP A  60     -87.391   3.955 -16.110  4.00  0.00           O  
ATOM   1908  N3  DCP A  60     -88.556   3.442 -17.960  8.00  0.00           N  
ATOM   1909  C4  DCP A  60     -88.751   3.547 -19.270  2.00  0.00           C  
ATOM   1910  N4  DCP A  60     -89.869   3.096 -19.820  8.00  0.00           N  
ATOM   1911  C5  DCP A  60     -87.834   4.321 -20.090  8.00  0.00           C  
ATOM   1912  C6  DCP A  60     -86.787   4.939 -19.490  0.00  0.00           C  
ATOM   1913  OP1 DCP A  60     -82.829  10.912 -16.700  2.00  0.00           O  
ATOM   1914  OP2 DCP A  60     -84.107  10.679 -18.830  2.00  0.00           O  
ATOM   1915  H3  DCP A  60     -89.069   2.803 -17.380  3.00  0.00           H  
ATOM   1916  H5  DCP A  60     -87.881   4.531 -21.140  7.00  0.00           H  
ATOM   1917  H6  DCP A  60     -86.069   5.528 -20.060  1.00  0.00           H  
ATOM   1918  H1' DCP A  60     -85.253   4.381 -16.650  5.00  0.00           H  
ATOM   1919  H2' DCP A  60     -84.039   6.011 -18.800  6.00  0.00           H  
ATOM   1920  H3' DCP A  60     -82.313   6.419 -16.960  4.00  0.00           H  
ATOM   1921  H4' DCP A  60     -84.211   6.311 -14.890  7.00  0.00           H  
ATOM   1922  H41 DCP A  60     -90.576   2.663 -19.260  0.00  0.00           H  
ATOM   1923  H5' DCP A  60     -84.505   8.580 -15.090  7.00  0.00           H  
ATOM   1924  H42 DCP A  60     -90.051   3.401 -20.820  9.00  0.00           H  
ATOM   1925 H2'' DCP A  60     -83.786   4.343 -18.370  6.00  0.00           H  
ATOM   1926 H5'' DCP A  60     -82.830   8.317 -15.720  2.00  0.00           H  
ATOM   1927  P    DT A  61     -81.400   3.936 -15.930  6.00  0.00           P  
ATOM   1928  C5'  DT A  61     -80.712   3.355 -18.410  5.00  0.00           C  
ATOM   1929  O5'  DT A  61     -81.367   2.994 -17.170  7.00  0.00           O  
ATOM   1930  C4'  DT A  61     -80.697   2.246 -19.440  3.00  0.00           C  
ATOM   1931  O4'  DT A  61     -79.852   1.121 -19.050  6.00  0.00           O  
ATOM   1932  C3'  DT A  61     -82.110   1.660 -19.860  0.00  0.00           C  
ATOM   1933  O3'  DT A  61     -81.881   1.293 -21.280  1.00  0.00           O  
ATOM   1934  C2'  DT A  61     -82.133   0.481 -18.910  3.00  0.00           C  
ATOM   1935  C1'  DT A  61     -80.662  -0.026 -18.980  5.00  0.00           C  
ATOM   1936  N1   DT A  61     -80.245  -0.782 -17.800  2.00  0.00           N  
ATOM   1937  C2   DT A  61     -79.589  -1.983 -17.980  3.00  0.00           C  
ATOM   1938  O2   DT A  61     -79.430  -2.559 -19.060  6.00  0.00           O  
ATOM   1939  N3   DT A  61     -78.991  -2.506 -16.890  2.00  0.00           N  
ATOM   1940  C4   DT A  61     -78.845  -1.859 -15.650  2.00  0.00           C  
ATOM   1941  O4   DT A  61     -78.136  -2.330 -14.780  5.00  0.00           O  
ATOM   1942  C5   DT A  61     -79.617  -0.651 -15.520  8.00  0.00           C  
ATOM   1943  C6   DT A  61     -80.288  -0.133 -16.550  6.00  0.00           C  
ATOM   1944  C7   DT A  61     -79.657   0.176 -14.280  3.00  0.00           C  
ATOM   1945  OP1  DT A  61     -81.274   3.170 -14.680  0.00  0.00           O  
ATOM   1946  OP2  DT A  61     -80.381   4.975 -16.130  2.00  0.00           O1-
ATOM   1947  H3   DT A  61     -78.209  -3.139 -17.050  9.00  0.00           H  
ATOM   1948  H6   DT A  61     -80.653   0.886 -16.310  7.00  0.00           H  
ATOM   1949  H1'  DT A  61     -80.544  -0.692 -19.850  0.00  0.00           H  
ATOM   1950  H2'  DT A  61     -82.481   0.756 -17.900  9.00  0.00           H  
ATOM   1951  H3'  DT A  61     -82.990   2.255 -19.710  5.00  0.00           H  
ATOM   1952  H4'  DT A  61     -80.187   2.555 -20.350  7.00  0.00           H  
ATOM   1953  H5'  DT A  61     -79.743   3.703 -18.240  9.00  0.00           H  
ATOM   1954  H71  DT A  61     -78.936   0.963 -14.400  8.00  0.00           H  
ATOM   1955  H72  DT A  61     -79.342  -0.364 -13.470  9.00  0.00           H  
ATOM   1956  H73  DT A  61     -80.630   0.582 -14.050  6.00  0.00           H  
ATOM   1957 H2''  DT A  61     -82.672  -0.263 -19.370  5.00  0.00           H  
ATOM   1958 H5''  DT A  61     -81.268   4.188 -18.780  4.00  0.00           H  
ATOM   1959  P    DA A  62     -82.986   0.710 -22.270  3.00  0.00           P  
ATOM   1960  C5'  DA A  62     -82.354  -1.787 -22.220  4.00  0.00           C  
ATOM   1961  O5'  DA A  62     -83.309  -0.772 -21.830  5.00  0.00           O  
ATOM   1962  C4'  DA A  62     -82.619  -3.084 -21.430  8.00  0.00           C  
ATOM   1963  O4'  DA A  62     -82.337  -2.891 -20.080  9.00  0.00           O  
ATOM   1964  C3'  DA A  62     -84.079  -3.627 -21.480  5.00  0.00           C  
ATOM   1965  O3'  DA A  62     -84.188  -4.996 -21.800  6.00  0.00           O  
ATOM   1966  C2'  DA A  62     -84.534  -3.427 -20.120  1.00  0.00           C  
ATOM   1967  C1'  DA A  62     -83.284  -3.575 -19.340  8.00  0.00           C  
ATOM   1968  N1   DA A  62     -81.133  -3.706 -14.570  2.00  0.00           N  
ATOM   1969  C2   DA A  62     -80.965  -4.488 -15.630  5.00  0.00           C  
ATOM   1970  N3   DA A  62     -81.510  -4.360 -16.850  3.00  0.00           N  
ATOM   1971  C4   DA A  62     -82.521  -3.420 -16.890  3.00  0.00           C  
ATOM   1972  C5   DA A  62     -82.896  -2.637 -15.810  5.00  0.00           C  
ATOM   1973  C6   DA A  62     -82.035  -2.753 -14.660  5.00  0.00           C  
ATOM   1974  N6   DA A  62     -82.112  -1.940 -13.650  2.00  0.00           N  
ATOM   1975  N7   DA A  62     -83.975  -1.831 -16.150  5.00  0.00           N  
ATOM   1976  C8   DA A  62     -84.208  -2.145 -17.350  8.00  0.00           C  
ATOM   1977  N9   DA A  62     -83.306  -2.995 -17.940  3.00  0.00           N  
ATOM   1978  OP1  DA A  62     -82.501   0.633 -23.700  6.00  0.00           O  
ATOM   1979  OP2  DA A  62     -84.150   1.582 -22.060  9.00  0.00           O1-
ATOM   1980  H2   DA A  62     -80.223  -5.226 -15.510  1.00  0.00           H  
ATOM   1981  H8   DA A  62     -84.992  -1.732 -17.960  8.00  0.00           H  
ATOM   1982  H1'  DA A  62     -83.003  -4.629 -19.280  2.00  0.00           H  
ATOM   1983  H2'  DA A  62     -84.847  -2.393 -20.030  4.00  0.00           H  
ATOM   1984  H3'  DA A  62     -84.676  -3.011 -22.170  6.00  0.00           H  
ATOM   1985  H4'  DA A  62     -81.927  -3.861 -21.860  8.00  0.00           H  
ATOM   1986  H5'  DA A  62     -81.377  -1.351 -21.910  8.00  0.00           H  
ATOM   1987  H61  DA A  62     -81.666  -2.318 -12.920  8.00  0.00           H  
ATOM   1988  H62  DA A  62     -82.854  -1.221 -13.610  5.00  0.00           H  
ATOM   1989 H2''  DA A  62     -85.284  -4.172 -19.860  4.00  0.00           H  
ATOM   1990 H5''  DA A  62     -82.398  -2.042 -23.290  4.00  0.00           H  
ATOM   1991  P    DA A  63     -84.396  -5.339 -23.360  8.00  0.00           P  
ATOM   1992  C5'  DA A  63     -86.578  -5.257 -24.870  5.00  0.00           C  
ATOM   1993  O5'  DA A  63     -85.975  -4.876 -23.640  2.00  0.00           O  
ATOM   1994  C4'  DA A  63     -87.998  -4.738 -24.990  7.00  0.00           C  
ATOM   1995  O4'  DA A  63     -88.916  -5.248 -23.960  7.00  0.00           O  
ATOM   1996  C3'  DA A  63     -88.174  -3.268 -24.830  8.00  0.00           C  
ATOM   1997  O3'  DA A  63     -89.199  -2.847 -25.680  3.00  0.00           O  
ATOM   1998  C2'  DA A  63     -88.416  -3.053 -23.350  4.00  0.00           C  
ATOM   1999  C1'  DA A  63     -89.376  -4.267 -23.150  6.00  0.00           C  
ATOM   2000  N1   DA A  63     -91.553  -3.921 -18.510  9.00  0.00           N  
ATOM   2001  C2   DA A  63     -92.047  -3.657 -19.780  7.00  0.00           C  
ATOM   2002  N3   DA A  63     -91.439  -3.899 -20.930  3.00  0.00           N  
ATOM   2003  C4   DA A  63     -90.167  -4.344 -20.750  0.00  0.00           C  
ATOM   2004  C5   DA A  63     -89.564  -4.637 -19.600  1.00  0.00           C  
ATOM   2005  C6   DA A  63     -90.293  -4.308 -18.380  4.00  0.00           C  
ATOM   2006  N6   DA A  63     -89.866  -4.470 -17.160  7.00  0.00           N  
ATOM   2007  N7   DA A  63     -88.225  -5.005 -19.740  2.00  0.00           N  
ATOM   2008  C8   DA A  63     -88.074  -4.931 -21.030  7.00  0.00           C  
ATOM   2009  N9   DA A  63     -89.257  -4.647 -21.730  4.00  0.00           N  
ATOM   2010  OP1  DA A  63     -84.348  -6.760 -23.470  3.00  0.00           O  
ATOM   2011  OP2  DA A  63     -83.589  -4.440 -24.260  6.00  0.00           O1-
ATOM   2012  H2   DA A  63     -93.155  -3.386 -19.810  4.00  0.00           H  
ATOM   2013  H8   DA A  63     -87.188  -5.289 -21.660  3.00  0.00           H  
ATOM   2014  H1'  DA A  63     -90.433  -3.986 -23.420  7.00  0.00           H  
ATOM   2015  H2'  DA A  63     -87.568  -3.008 -22.710  6.00  0.00           H  
ATOM   2016  H3'  DA A  63     -87.206  -2.820 -25.170  9.00  0.00           H  
ATOM   2017  H4'  DA A  63     -88.272  -4.959 -25.990  1.00  0.00           H  
ATOM   2018  H5'  DA A  63     -86.627  -6.453 -24.800  4.00  0.00           H  
ATOM   2019  H61  DA A  63     -90.382  -4.016 -16.460  6.00  0.00           H  
ATOM   2020  H62  DA A  63     -88.931  -4.728 -16.960  5.00  0.00           H  
ATOM   2021 H2''  DA A  63     -88.995  -2.130 -23.140  7.00  0.00           H  
ATOM   2022 H5''  DA A  63     -86.084  -4.817 -25.730  0.00  0.00           H  
ATOM   2023  P   DCP A  64     -89.444  -1.344 -26.070  4.00  0.00           P  
ATOM   2024  C5' DCP A  64     -91.728  -0.907 -24.900  9.00  0.00           C  
ATOM   2025  O5' DCP A  64     -90.351  -0.615 -24.950  0.00  0.00           O  
ATOM   2026  C4' DCP A  64     -92.417  -0.577 -23.630  9.00  0.00           C  
ATOM   2027  O4' DCP A  64     -91.656  -1.144 -22.580  8.00  0.00           O  
ATOM   2028  C3' DCP A  64     -92.634   0.872 -23.340  3.00  0.00           C  
ATOM   2029  O3' DCP A  64     -93.802   1.425 -23.870  9.00  0.00           O  
ATOM   2030  C2' DCP A  64     -92.695   0.680 -21.750  2.00  0.00           C  
ATOM   2031  C1' DCP A  64     -91.639  -0.333 -21.430  6.00  0.00           C  
ATOM   2032  N1  DCP A  64     -90.154   0.002 -21.210  5.00  0.00           N  
ATOM   2033  C2  DCP A  64     -89.634  -0.313 -19.970  5.00  0.00           C  
ATOM   2034  O2  DCP A  64     -90.345  -0.844 -19.090  3.00  0.00           O  
ATOM   2035  N3  DCP A  64     -88.350  -0.015 -19.660  3.00  0.00           N  
ATOM   2036  C4  DCP A  64     -87.539   0.543 -20.510  9.00  0.00           C  
ATOM   2037  N4  DCP A  64     -86.321   0.941 -20.070  6.00  0.00           N  
ATOM   2038  C5  DCP A  64     -87.979   0.869 -21.850  0.00  0.00           C  
ATOM   2039  C6  DCP A  64     -89.326   0.588 -22.120  3.00  0.00           C  
ATOM   2040  OP1 DCP A  64     -90.217  -1.286 -27.360  4.00  0.00           O  
ATOM   2041  OP2 DCP A  64     -88.209  -0.586 -25.960  9.00  0.00           O  
ATOM   2042  H3  DCP A  64     -88.052  -0.278 -18.740  2.00  0.00           H  
ATOM   2043  H5  DCP A  64     -87.448   1.363 -22.660  1.00  0.00           H  
ATOM   2044  H6  DCP A  64     -89.816   0.845 -23.100  0.00  0.00           H  
ATOM   2045  H1' DCP A  64     -92.017  -0.893 -20.540  5.00  0.00           H  
ATOM   2046  H2' DCP A  64     -92.515   1.591 -21.160  7.00  0.00           H  
ATOM   2047  H3' DCP A  64     -91.745   1.359 -23.630  7.00  0.00           H  
ATOM   2048  H4' DCP A  64     -93.413  -1.017 -23.620  6.00  0.00           H  
ATOM   2049  H41 DCP A  64     -86.016   0.926 -19.090  4.00  0.00           H  
ATOM   2050  H5' DCP A  64     -91.892  -1.970 -25.200  9.00  0.00           H  
ATOM   2051  H42 DCP A  64     -85.621   1.185 -20.800  2.00  0.00           H  
ATOM   2052 H2'' DCP A  64     -93.684   0.346 -21.460  8.00  0.00           H  
ATOM   2053 H5'' DCP A  64     -92.176  -0.259 -25.660  4.00  0.00           H  
ATOM   2054  P   DCP A  65     -94.148   2.942 -23.690  5.00  0.00           P  
ATOM   2055  C5' DCP A  65     -95.787   2.479 -21.680  2.00  0.00           C  
ATOM   2056  O5' DCP A  65     -94.598   3.134 -22.220  1.00  0.00           O  
ATOM   2057  C4' DCP A  65     -96.211   3.022 -20.330  1.00  0.00           C  
ATOM   2058  O4' DCP A  65     -95.136   2.925 -19.380  9.00  0.00           O  
ATOM   2059  C3' DCP A  65     -96.484   4.503 -20.380  7.00  0.00           C  
ATOM   2060  O3' DCP A  65     -97.724   4.953 -20.910  6.00  0.00           O  
ATOM   2061  C2' DCP A  65     -96.223   4.971 -18.940  0.00  0.00           C  
ATOM   2062  C1' DCP A  65     -95.100   3.991 -18.490  5.00  0.00           C  
ATOM   2063  N1  DCP A  65     -93.757   4.659 -18.460  7.00  0.00           N  
ATOM   2064  C2  DCP A  65     -92.866   4.464 -17.400  1.00  0.00           C  
ATOM   2065  O2  DCP A  65     -93.170   3.810 -16.400  0.00  0.00           O  
ATOM   2066  N3  DCP A  65     -91.717   5.110 -17.560  4.00  0.00           N  
ATOM   2067  C4  DCP A  65     -91.322   5.801 -18.610  1.00  0.00           C  
ATOM   2068  N4  DCP A  65     -90.214   6.433 -18.600  1.00  0.00           N  
ATOM   2069  C5  DCP A  65     -92.148   5.936 -19.720  7.00  0.00           C  
ATOM   2070  C6  DCP A  65     -93.309   5.300 -19.620  9.00  0.00           C  
ATOM   2071  OP1 DCP A  65     -95.304   3.143 -24.590  7.00  0.00           O  
ATOM   2072  OP2 DCP A  65     -92.904   3.730 -24.030  5.00  0.00           O  
ATOM   2073  H3  DCP A  65     -91.213   4.983 -16.730  5.00  0.00           H  
ATOM   2074  H5  DCP A  65     -91.901   6.522 -20.610  8.00  0.00           H  
ATOM   2075  H6  DCP A  65     -93.980   5.371 -20.540  7.00  0.00           H  
ATOM   2076  H1' DCP A  65     -95.179   3.543 -17.490  2.00  0.00           H  
ATOM   2077  H2' DCP A  65     -95.909   6.006 -18.960  3.00  0.00           H  
ATOM   2078  H3' DCP A  65     -95.799   4.958 -21.080  6.00  0.00           H  
ATOM   2079  H4' DCP A  65     -97.100   2.519 -19.880  5.00  0.00           H  
ATOM   2080  H41 DCP A  65     -89.624   6.506 -17.780  3.00  0.00           H  
ATOM   2081  H5' DCP A  65     -95.568   1.327 -21.610  5.00  0.00           H  
ATOM   2082  H42 DCP A  65     -89.958   7.032 -19.420  2.00  0.00           H  
ATOM   2083 H2'' DCP A  65     -97.058   4.791 -18.210  5.00  0.00           H  
ATOM   2084 H5'' DCP A  65     -96.647   2.744 -22.320  7.00  0.00           H  
ATOM   2085  P   DCP A  66     -98.192   6.428 -20.950  6.00  0.00           P  
ATOM   2086  C5' DCP A  66     -99.738   6.045 -18.840  1.00  0.00           C  
ATOM   2087  O5' DCP A  66     -98.716   6.763 -19.480  8.00  0.00           O  
ATOM   2088  C4' DCP A  66     -99.840   6.539 -17.400  8.00  0.00           C  
ATOM   2089  O4' DCP A  66     -98.645   6.666 -16.630  6.00  0.00           O  
ATOM   2090  C3' DCP A  66    -100.363   8.005 -17.470  3.00  0.00           C  
ATOM   2091  O3' DCP A  66    -101.761   8.008 -17.560  7.00  0.00           O  
ATOM   2092  C2' DCP A  66     -99.975   8.581 -16.080  0.00  0.00           C  
ATOM   2093  C1' DCP A  66     -98.724   7.788 -15.730  4.00  0.00           C  
ATOM   2094  N1  DCP A  66     -97.538   8.599 -15.960  9.00  0.00           N  
ATOM   2095  C2  DCP A  66     -96.794   9.152 -14.890  0.00  0.00           C  
ATOM   2096  O2  DCP A  66     -97.024   8.845 -13.730  6.00  0.00           O  
ATOM   2097  N3  DCP A  66     -95.768  10.056 -15.090  6.00  0.00           N  
ATOM   2098  C4  DCP A  66     -95.503  10.509 -16.320  2.00  0.00           C  
ATOM   2099  N4  DCP A  66     -94.612  11.401 -16.420  1.00  0.00           N  
ATOM   2100  C5  DCP A  66     -96.259  10.026 -17.430  6.00  0.00           C  
ATOM   2101  C6  DCP A  66     -97.290   9.123 -17.210  9.00  0.00           C  
ATOM   2102  OP1 DCP A  66     -99.304   6.472 -21.880  2.00  0.00           O  
ATOM   2103  OP2 DCP A  66     -96.984   7.277 -21.200  4.00  0.00           O  
ATOM   2104  H3  DCP A  66     -95.360  10.463 -14.230  4.00  0.00           H  
ATOM   2105  H5  DCP A  66     -96.140  10.416 -18.410  2.00  0.00           H  
ATOM   2106  H6  DCP A  66     -97.870   8.690 -18.060  6.00  0.00           H  
ATOM   2107  H1' DCP A  66     -98.830   7.387 -14.690  1.00  0.00           H  
ATOM   2108  H2' DCP A  66     -99.713   9.586 -16.030  1.00  0.00           H  
ATOM   2109  H3' DCP A  66     -99.882   8.526 -18.270  4.00  0.00           H  
ATOM   2110  H4' DCP A  66    -100.638   5.945 -16.870  7.00  0.00           H  
ATOM   2111  H41 DCP A  66     -94.194  11.785 -15.640  3.00  0.00           H  
ATOM   2112  H5' DCP A  66     -99.649   4.988 -18.920  7.00  0.00           H  
ATOM   2113  H42 DCP A  66     -94.462  11.844 -17.290  7.00  0.00           H  
ATOM   2114 H2'' DCP A  66    -100.781   8.341 -15.340  6.00  0.00           H  
ATOM   2115 H5'' DCP A  66    -100.743   6.343 -19.240  4.00  0.00           H  
ATOM   2116  P    DT A  67    -102.555   8.721 -18.730  6.00  0.00           P  
ATOM   2117  C5'  DT A  67    -103.693  10.669 -17.240  4.00  0.00           C  
ATOM   2118  O5'  DT A  67    -102.788  10.268 -18.280  2.00  0.00           O  
ATOM   2119  C4'  DT A  67    -103.391  10.532 -15.760  6.00  0.00           C  
ATOM   2120  O4'  DT A  67    -102.146  11.178 -15.420  0.00  0.00           O  
ATOM   2121  C3'  DT A  67    -104.479  11.238 -14.860  9.00  0.00           C  
ATOM   2122  O3'  DT A  67    -104.476  10.646 -13.590  9.00  0.00           O  
ATOM   2123  C2'  DT A  67    -103.964  12.689 -14.760  5.00  0.00           C  
ATOM   2124  C1'  DT A  67    -102.462  12.446 -14.680  5.00  0.00           C  
ATOM   2125  N1   DT A  67    -101.604  13.553 -15.220  2.00  0.00           N  
ATOM   2126  C2   DT A  67    -100.956  14.254 -14.230  6.00  0.00           C  
ATOM   2127  O2   DT A  67    -101.074  14.129 -12.990  0.00  0.00           O  
ATOM   2128  N3   DT A  67    -100.139  15.269 -14.660  3.00  0.00           N  
ATOM   2129  C4   DT A  67     -99.997  15.705 -15.990  3.00  0.00           C  
ATOM   2130  O4   DT A  67     -99.247  16.661 -16.250  5.00  0.00           O  
ATOM   2131  C5   DT A  67    -100.834  14.977 -16.960  7.00  0.00           C  
ATOM   2132  C6   DT A  67    -101.617  13.883 -16.570  6.00  0.00           C  
ATOM   2133  C7   DT A  67    -100.826  15.267 -18.500  2.00  0.00           C  
ATOM   2134  OP1  DT A  67    -103.860   8.047 -18.720  2.00  0.00           O  
ATOM   2135  OP2  DT A  67    -101.753   8.768 -19.950  9.00  0.00           O1-
ATOM   2136  H3   DT A  67     -99.878  15.899 -13.940  6.00  0.00           H  
ATOM   2137  H6   DT A  67    -102.180  13.305 -17.250  9.00  0.00           H  
ATOM   2138  H1'  DT A  67    -102.258  12.355 -13.590  0.00  0.00           H  
ATOM   2139  H2'  DT A  67    -104.228  13.353 -15.500  4.00  0.00           H  
ATOM   2140  H3'  DT A  67    -105.453  11.268 -15.250  9.00  0.00           H  
ATOM   2141  H4'  DT A  67    -103.277   9.486 -15.570  3.00  0.00           H  
ATOM   2142  H5'  DT A  67    -104.652  10.121 -17.480  8.00  0.00           H  
ATOM   2143  H71  DT A  67     -99.840  15.179 -18.780  6.00  0.00           H  
ATOM   2144  H72  DT A  67    -101.145  16.287 -18.700  5.00  0.00           H  
ATOM   2145  H73  DT A  67    -101.408  14.525 -19.110  7.00  0.00           H  
ATOM   2146 H2''  DT A  67    -104.278  13.233 -13.900  9.00  0.00           H  
ATOM   2147 H5''  DT A  67    -103.860  11.711 -17.380  7.00  0.00           H  
ATOM   2148  P    DA A  68    -105.594  10.821 -12.540  9.00  0.00           P  
ATOM   2149  C5'  DA A  68    -104.444  12.702 -11.000  7.00  0.00           C  
ATOM   2150  O5'  DA A  68    -105.450  12.277 -11.970  5.00  0.00           O  
ATOM   2151  C4'  DA A  68    -104.511  14.175 -10.720  5.00  0.00           C  
ATOM   2152  O4'  DA A  68    -104.035  14.996 -11.840  4.00  0.00           O  
ATOM   2153  C3'  DA A  68    -105.951  14.634 -10.270  1.00  0.00           C  
ATOM   2154  O3'  DA A  68    -105.927  15.682  -9.370  5.00  0.00           O  
ATOM   2155  C2'  DA A  68    -106.389  15.111 -11.650  3.00  0.00           C  
ATOM   2156  C1'  DA A  68    -105.117  15.895 -12.120  7.00  0.00           C  
ATOM   2157  N1   DA A  68    -102.107  17.951 -15.720  2.00  0.00           N  
ATOM   2158  C2   DA A  68    -102.070  17.896 -14.370  4.00  0.00           C  
ATOM   2159  N3   DA A  68    -102.917  17.372 -13.530  5.00  0.00           N  
ATOM   2160  C4   DA A  68    -103.973  16.821 -14.150  6.00  0.00           C  
ATOM   2161  C5   DA A  68    -104.088  16.744 -15.550  6.00  0.00           C  
ATOM   2162  C6   DA A  68    -103.150  17.470 -16.330  5.00  0.00           C  
ATOM   2163  N6   DA A  68    -103.249  17.588 -17.640  5.00  0.00           N  
ATOM   2164  N7   DA A  68    -105.236  15.981 -15.830  1.00  0.00           N  
ATOM   2165  C8   DA A  68    -105.743  15.694 -14.630  3.00  0.00           C  
ATOM   2166  N9   DA A  68    -105.063  16.180 -13.590  0.00  0.00           N  
ATOM   2167  OP1  DA A  68    -105.360   9.858 -11.460  5.00  0.00           O  
ATOM   2168  OP2  DA A  68    -106.894  10.836 -13.270  9.00  0.00           O1-
ATOM   2169  H2   DA A  68    -101.207  18.271 -13.920  4.00  0.00           H  
ATOM   2170  H8   DA A  68    -106.662  15.073 -14.480  7.00  0.00           H  
ATOM   2171  H1'  DA A  68    -105.094  16.827 -11.500  9.00  0.00           H  
ATOM   2172  H2'  DA A  68    -106.671  14.236 -12.270  3.00  0.00           H  
ATOM   2173  H3'  DA A  68    -106.550  13.818  -9.850  9.00  0.00           H  
ATOM   2174  H4'  DA A  68    -103.875  14.329  -9.840  7.00  0.00           H  
ATOM   2175  H5'  DA A  68    -103.430  12.477 -11.340  4.00  0.00           H  
ATOM   2176  H61  DA A  68    -102.437  17.986 -18.170  7.00  0.00           H  
ATOM   2177  H62  DA A  68    -103.983  17.009 -18.040  6.00  0.00           H  
ATOM   2178 H2''  DA A  68    -107.240  15.851 -11.510  4.00  0.00           H  
ATOM   2179 H5''  DA A  68    -104.609  12.189 -10.000  5.00  0.00           H  
ATOM   2180  P    DA A  69    -106.240  15.388  -7.780  4.00  0.00           P  
ATOM   2181  C5'  DA A  69    -103.917  14.409  -6.850  6.00  0.00           C  
ATOM   2182  O5'  DA A  69    -105.251  14.208  -7.300  3.00  0.00           O  
ATOM   2183  C4'  DA A  69    -103.414  13.164  -6.070  5.00  0.00           C  
ATOM   2184  O4'  DA A  69    -104.116  13.113  -4.830  0.00  0.00           O  
ATOM   2185  C3'  DA A  69    -103.362  11.778  -6.810  4.00  0.00           C  
ATOM   2186  O3'  DA A  69    -102.168  11.019  -6.610  0.00  0.00           O  
ATOM   2187  C2'  DA A  69    -104.408  11.115  -5.880  7.00  0.00           C  
ATOM   2188  C1'  DA A  69    -104.341  11.832  -4.520  3.00  0.00           C  
ATOM   2189  N1   DA A  69    -107.380   9.399  -0.940  5.00  0.00           N  
ATOM   2190  C2   DA A  69    -106.160   9.147  -1.310  0.00  0.00           C  
ATOM   2191  N3   DA A  69    -105.402   9.801  -2.180  2.00  0.00           N  
ATOM   2192  C4   DA A  69    -106.090  10.861  -2.750  8.00  0.00           C  
ATOM   2193  C5   DA A  69    -107.478  11.170  -2.580  8.00  0.00           C  
ATOM   2194  C6   DA A  69    -108.080  10.311  -1.640  2.00  0.00           C  
ATOM   2195  N6   DA A  69    -109.274  10.490  -1.090  8.00  0.00           N  
ATOM   2196  N7   DA A  69    -107.774  12.348  -3.310  4.00  0.00           N  
ATOM   2197  C8   DA A  69    -106.675  12.667  -3.900  7.00  0.00           C  
ATOM   2198  N9   DA A  69    -105.650  11.742  -3.720  7.00  0.00           N  
ATOM   2199  OP1  DA A  69    -107.561  14.753  -7.670  3.00  0.00           O  
ATOM   2200  OP2  DA A  69    -105.945  16.661  -7.040  5.00  0.00           O1-
ATOM   2201  H2   DA A  69    -105.719   8.379  -0.760  9.00  0.00           H  
ATOM   2202  H8   DA A  69    -106.465  13.500  -4.550  3.00  0.00           H  
ATOM   2203  H1'  DA A  69    -103.542  11.504  -3.900  6.00  0.00           H  
ATOM   2204  H2'  DA A  69    -105.413  11.200  -6.400  2.00  0.00           H  
ATOM   2205  H3'  DA A  69    -103.803  11.727  -7.800  0.00  0.00           H  
ATOM   2206  H4'  DA A  69    -102.358  13.325  -5.940  3.00  0.00           H  
ATOM   2207  H5'  DA A  69    -103.927  15.331  -6.220  5.00  0.00           H  
ATOM   2208  H61  DA A  69    -109.623   9.640  -0.660  4.00  0.00           H  
ATOM   2209  H62  DA A  69    -109.739  11.346  -1.420  1.00  0.00           H  
ATOM   2210 H2''  DA A  69    -104.254  10.043  -5.730  3.00  0.00           H  
ATOM   2211 H5''  DA A  69    -103.190  14.617  -7.650  5.00  0.00           H  
ATOM   2212  P    DC A  70    -100.944  11.204  -7.530  1.00  0.00           P  
ATOM   2213  C5'  DC A  70    -102.296  10.319  -9.620  9.00  0.00           C  
ATOM   2214  O5'  DC A  70    -101.099  10.220  -8.780  0.00  0.00           O  
ATOM   2215  C4'  DC A  70    -102.013   9.912 -11.100  2.00  0.00           C  
ATOM   2216  O4'  DC A  70    -101.331  11.029 -11.700  4.00  0.00           O  
ATOM   2217  C3'  DC A  70    -101.289   8.557 -11.290  3.00  0.00           C  
ATOM   2218  O3'  DC A  70    -101.957   7.737 -12.230  3.00  0.00           O  
ATOM   2219  C2'  DC A  70     -99.841   9.093 -11.740  3.00  0.00           C  
ATOM   2220  C1'  DC A  70    -100.265  10.441 -12.420  7.00  0.00           C  
ATOM   2221  N1   DC A  70     -99.157  11.483 -12.300  2.00  0.00           N  
ATOM   2222  C2   DC A  70     -98.538  11.888 -13.500  5.00  0.00           C  
ATOM   2223  O2   DC A  70     -98.929  11.487 -14.640  6.00  0.00           O  
ATOM   2224  N3   DC A  70     -97.434  12.640 -13.540  9.00  0.00           N  
ATOM   2225  C4   DC A  70     -96.967  13.060 -12.390  5.00  0.00           C  
ATOM   2226  N4   DC A  70     -95.943  13.885 -12.430  1.00  0.00           N  
ATOM   2227  C5   DC A  70     -97.529  12.656 -11.100  7.00  0.00           C  
ATOM   2228  C6   DC A  70     -98.683  11.944 -11.150  4.00  0.00           C  
ATOM   2229  OP1  DC A  70     -99.786  10.581  -6.880  3.00  0.00           O  
ATOM   2230  OP2  DC A  70    -100.815  12.586  -8.040  5.00  0.00           O1-
ATOM   2231  H5   DC A  70     -97.232  12.930 -10.100  1.00  0.00           H  
ATOM   2232  H6   DC A  70     -99.208  11.531 -10.280  4.00  0.00           H  
ATOM   2233  H1'  DC A  70    -100.565  10.307 -13.430  9.00  0.00           H  
ATOM   2234  H2'  DC A  70     -99.207   9.313 -10.930  9.00  0.00           H  
ATOM   2235  H3'  DC A  70    -101.161   7.997 -10.330  0.00  0.00           H  
ATOM   2236  H4'  DC A  70    -102.930   9.851 -11.590  0.00  0.00           H  
ATOM   2237  H41  DC A  70     -95.610  14.074 -13.360  6.00  0.00           H  
ATOM   2238  H5'  DC A  70    -102.789  11.249  -9.690  3.00  0.00           H  
ATOM   2239  H42  DC A  70     -95.394  14.163 -11.580  3.00  0.00           H  
ATOM   2240 H2''  DC A  70     -99.302   8.284 -12.380  8.00  0.00           H  
ATOM   2241 H5''  DC A  70    -103.038   9.625  -9.300  4.00  0.00           H  
ATOM   2242  P    DC A  71    -101.698   6.173 -12.490  1.00  0.00           P  
ATOM   2243  C5'  DC A  71     -99.429   4.813 -12.740  5.00  0.00           C  
ATOM   2244  O5'  DC A  71    -100.217   5.966 -13.110  6.00  0.00           O  
ATOM   2245  C4'  DC A  71     -98.188   4.742 -13.630  9.00  0.00           C  
ATOM   2246  O4'  DC A  71     -97.168   5.703 -13.480  7.00  0.00           O  
ATOM   2247  C3'  DC A  71     -97.606   3.384 -13.430  9.00  0.00           C  
ATOM   2248  O3'  DC A  71     -98.160   2.494 -14.340  8.00  0.00           O  
ATOM   2249  C2'  DC A  71     -96.155   3.770 -13.820  9.00  0.00           C  
ATOM   2250  C1'  DC A  71     -96.052   5.236 -14.180  9.00  0.00           C  
ATOM   2251  N1   DC A  71     -94.911   5.971 -13.630  2.00  0.00           N  
ATOM   2252  C2   DC A  71     -94.143   6.743 -14.480  6.00  0.00           C  
ATOM   2253  O2   DC A  71     -94.315   6.811 -15.720  4.00  0.00           O  
ATOM   2254  N3   DC A  71     -93.125   7.551 -14.010  7.00  0.00           N  
ATOM   2255  C4   DC A  71     -92.784   7.426 -12.740  5.00  0.00           C  
ATOM   2256  N4   DC A  71     -91.797   8.160 -12.310  8.00  0.00           N  
ATOM   2257  C5   DC A  71     -93.461   6.567 -11.850  2.00  0.00           C  
ATOM   2258  C6   DC A  71     -94.564   5.894 -12.280  5.00  0.00           C  
ATOM   2259  OP1  DC A  71    -102.629   5.728 -13.540  7.00  0.00           O  
ATOM   2260  OP2  DC A  71    -101.761   5.520 -11.180  5.00  0.00           O1-
ATOM   2261  H5   DC A  71     -93.166   6.578 -10.800  7.00  0.00           H  
ATOM   2262  H6   DC A  71     -95.255   5.306 -11.640  0.00  0.00           H  
ATOM   2263  H1'  DC A  71     -96.348   5.320 -15.240  4.00  0.00           H  
ATOM   2264  H2'  DC A  71     -95.406   3.514 -13.060  6.00  0.00           H  
ATOM   2265  H3'  DC A  71     -97.828   3.079 -12.390  7.00  0.00           H  
ATOM   2266  H4'  DC A  71     -98.626   4.837 -14.700  6.00  0.00           H  
ATOM   2267  H41  DC A  71     -91.388   8.798 -13.000  1.00  0.00           H  
ATOM   2268  H5'  DC A  71     -99.971   3.939 -13.020  8.00  0.00           H  
ATOM   2269  H42  DC A  71     -91.569   8.164 -11.300  4.00  0.00           H  
ATOM   2270 H2''  DC A  71     -95.811   3.114 -14.660  6.00  0.00           H  
ATOM   2271 H5''  DC A  71     -99.156   4.807 -11.740  4.00  0.00           H  
ATOM   2272  P    DC A  72     -98.023   0.917 -14.220  3.00  0.00           P  
ATOM   2273  C5'  DC A  72     -97.082   0.796 -16.660  1.00  0.00           C  
ATOM   2274  O5'  DC A  72     -96.847   0.559 -15.320  7.00  0.00           O  
ATOM   2275  C4'  DC A  72     -96.023   0.351 -17.670  6.00  0.00           C  
ATOM   2276  O4'  DC A  72     -94.815   1.040 -17.340  1.00  0.00           O  
ATOM   2277  C3'  DC A  72     -95.737  -1.149 -17.750  6.00  0.00           C  
ATOM   2278  O3'  DC A  72     -95.496  -1.550 -19.040  4.00  0.00           O  
ATOM   2279  C2'  DC A  72     -94.433  -1.160 -17.010  3.00  0.00           C  
ATOM   2280  C1'  DC A  72     -93.703   0.110 -17.430  5.00  0.00           C  
ATOM   2281  N1   DC A  72     -92.580   0.545 -16.530  9.00  0.00           N  
ATOM   2282  C2   DC A  72     -91.625   1.437 -17.110  8.00  0.00           C  
ATOM   2283  O2   DC A  72     -91.742   1.796 -18.260  4.00  0.00           O  
ATOM   2284  N3   DC A  72     -90.611   1.991 -16.450  3.00  0.00           N  
ATOM   2285  C4   DC A  72     -90.396   1.490 -15.260  4.00  0.00           C  
ATOM   2286  N4   DC A  72     -89.348   2.069 -14.680  0.00  0.00           N  
ATOM   2287  C5   DC A  72     -91.220   0.432 -14.640  7.00  0.00           C  
ATOM   2288  C6   DC A  72     -92.262  -0.020 -15.320  8.00  0.00           C  
ATOM   2289  OP1  DC A  72     -99.271   0.152 -14.520  1.00  0.00           O  
ATOM   2290  OP2  DC A  72     -97.441   0.639 -12.910  3.00  0.00           O1-
ATOM   2291  H5   DC A  72     -90.935   0.026 -13.680  1.00  0.00           H  
ATOM   2292  H6   DC A  72     -92.901  -0.750 -14.800  5.00  0.00           H  
ATOM   2293  H1'  DC A  72     -93.339   0.019 -18.450  6.00  0.00           H  
ATOM   2294  H2'  DC A  72     -94.674  -1.064 -15.900  4.00  0.00           H  
ATOM   2295  H3'  DC A  72     -96.520  -1.680 -17.230  1.00  0.00           H  
ATOM   2296  H4'  DC A  72     -96.428   0.615 -18.600  5.00  0.00           H  
ATOM   2297  H41  DC A  72     -88.996   2.961 -15.010  7.00  0.00           H  
ATOM   2298  H5'  DC A  72     -97.176   1.875 -16.680  4.00  0.00           H  
ATOM   2299  H42  DC A  72     -89.100   1.896 -13.730  2.00  0.00           H  
ATOM   2300 H2''  DC A  72     -93.918  -2.061 -17.220  4.00  0.00           H  
ATOM   2301 H5''  DC A  72     -98.052   0.381 -17.030  2.00  0.00           H  
ATOM   2302  P    DT A  73     -96.074  -2.843 -19.570  3.00  0.00           P  
ATOM   2303  C5'  DT A  73     -96.430  -5.142 -18.210  8.00  0.00           C  
ATOM   2304  O5'  DT A  73     -95.555  -4.145 -18.770  1.00  0.00           O  
ATOM   2305  C4'  DT A  73     -95.788  -6.308 -17.410  3.00  0.00           C  
ATOM   2306  O4'  DT A  73     -94.993  -7.115 -18.190  5.00  0.00           O  
ATOM   2307  C3'  DT A  73     -94.944  -5.901 -16.200  5.00  0.00           C  
ATOM   2308  O3'  DT A  73     -94.888  -6.898 -15.090  5.00  0.00           O  
ATOM   2309  C2'  DT A  73     -93.623  -5.763 -16.850  5.00  0.00           C  
ATOM   2310  C1'  DT A  73     -93.700  -7.077 -17.620  3.00  0.00           C  
ATOM   2311  N1   DT A  73     -92.563  -7.352 -18.530  4.00  0.00           N  
ATOM   2312  C2   DT A  73     -91.388  -8.029 -18.000  0.00  0.00           C  
ATOM   2313  O2   DT A  73     -91.161  -8.213 -16.780  6.00  0.00           O  
ATOM   2314  N3   DT A  73     -90.604  -8.643 -18.960  2.00  0.00           N  
ATOM   2315  C4   DT A  73     -90.572  -8.446 -20.270  7.00  0.00           C  
ATOM   2316  O4   DT A  73     -89.593  -8.868 -20.860  8.00  0.00           O  
ATOM   2317  C5   DT A  73     -91.711  -7.569 -20.700  7.00  0.00           C  
ATOM   2318  C6   DT A  73     -92.643  -7.094 -19.860  1.00  0.00           C  
ATOM   2319  C7   DT A  73     -91.806  -7.254 -22.200  7.00  0.00           C  
ATOM   2320  OP1  DT A  73     -95.470  -2.866 -20.930  8.00  0.00           O  
ATOM   2321  OP2  DT A  73     -97.555  -2.987 -19.460  2.00  0.00           O1-
ATOM   2322  H3   DT A  73     -89.809  -9.260 -18.600  0.00  0.00           H  
ATOM   2323  H6   DT A  73     -93.334  -6.378 -20.120  7.00  0.00           H  
ATOM   2324  H1'  DT A  73     -93.603  -7.968 -16.870  8.00  0.00           H  
ATOM   2325  H2'  DT A  73     -93.715  -4.960 -17.610  3.00  0.00           H  
ATOM   2326  H3'  DT A  73     -95.347  -4.977 -15.910  6.00  0.00           H  
ATOM   2327  H4'  DT A  73     -96.660  -6.854 -16.940  6.00  0.00           H  
ATOM   2328  H5'  DT A  73     -97.003  -5.597 -19.040  9.00  0.00           H  
ATOM   2329  H71  DT A  73     -91.046  -6.603 -22.670  8.00  0.00           H  
ATOM   2330  H72  DT A  73     -91.724  -8.217 -22.690  4.00  0.00           H  
ATOM   2331  H73  DT A  73     -92.790  -6.840 -22.340  3.00  0.00           H  
ATOM   2332 H2''  DT A  73     -92.801  -5.642 -16.150  9.00  0.00           H  
ATOM   2333 H5''  DT A  73     -97.142  -4.731 -17.580  1.00  0.00           H  
ATOM   2334  P    DA A  74     -95.107  -6.600 -13.520  2.00  0.00           P  
ATOM   2335  C5'  DA A  74     -92.552  -7.223 -13.130  2.00  0.00           C  
ATOM   2336  O5'  DA A  74     -93.642  -6.290 -12.880  8.00  0.00           O  
ATOM   2337  C4'  DA A  74     -91.362  -6.861 -12.200  3.00  0.00           C  
ATOM   2338  O4'  DA A  74     -90.309  -7.793 -12.400  7.00  0.00           O  
ATOM   2339  C3'  DA A  74     -90.743  -5.433 -12.360  4.00  0.00           C  
ATOM   2340  O3'  DA A  74     -90.623  -4.904 -11.010  9.00  0.00           O  
ATOM   2341  C2'  DA A  74     -89.476  -5.702 -13.160  2.00  0.00           C  
ATOM   2342  C1'  DA A  74     -89.098  -7.075 -12.630  1.00  0.00           C  
ATOM   2343  N1   DA A  74     -84.611  -9.324 -12.880  7.00  0.00           N  
ATOM   2344  C2   DA A  74     -85.172  -8.559 -11.950  2.00  0.00           C  
ATOM   2345  N3   DA A  74     -86.406  -8.000 -11.980  7.00  0.00           N  
ATOM   2346  C4   DA A  74     -86.942  -8.114 -13.270  6.00  0.00           C  
ATOM   2347  C5   DA A  74     -86.367  -8.680 -14.350  7.00  0.00           C  
ATOM   2348  C6   DA A  74     -85.210  -9.425 -14.060  5.00  0.00           C  
ATOM   2349  N6   DA A  74     -84.629 -10.292 -14.920  8.00  0.00           N  
ATOM   2350  N7   DA A  74     -87.295  -8.594 -15.460  0.00  0.00           N  
ATOM   2351  C8   DA A  74     -88.335  -7.960 -14.910  8.00  0.00           C  
ATOM   2352  N9   DA A  74     -88.215  -7.724 -13.590  0.00  0.00           N  
ATOM   2353  OP1  DA A  74     -95.574  -7.805 -12.840  8.00  0.00           O  
ATOM   2354  OP2  DA A  74     -95.960  -5.377 -13.430  8.00  0.00           O1-
ATOM   2355  H2   DA A  74     -84.560  -8.492 -11.050  4.00  0.00           H  
ATOM   2356  H8   DA A  74     -89.179  -7.557 -15.490  2.00  0.00           H  
ATOM   2357  H1'  DA A  74     -88.528  -6.856 -11.700  2.00  0.00           H  
ATOM   2358  H2'  DA A  74     -89.750  -5.810 -14.250  7.00  0.00           H  
ATOM   2359  H3'  DA A  74     -91.411  -4.788 -12.880  9.00  0.00           H  
ATOM   2360  H4'  DA A  74     -91.774  -7.016 -11.270  9.00  0.00           H  
ATOM   2361  H5'  DA A  74     -92.207  -7.152 -14.180  6.00  0.00           H  
ATOM   2362  H61  DA A  74     -83.913 -10.917 -14.700  3.00  0.00           H  
ATOM   2363  H62  DA A  74     -85.189 -10.584 -15.690  5.00  0.00           H  
ATOM   2364 H2''  DA A  74     -88.596  -5.044 -13.160  4.00  0.00           H  
ATOM   2365 H5''  DA A  74     -92.849  -8.235 -12.960  7.00  0.00           H  
ATOM   2366  P    DA A  75     -90.031  -3.423 -10.830  9.00  0.00           P  
ATOM   2367  C5'  DA A  75     -87.667  -4.237 -10.100  8.00  0.00           C  
ATOM   2368  O5'  DA A  75     -88.485  -3.526 -11.020  2.00  0.00           O  
ATOM   2369  C4'  DA A  75     -86.306  -4.145 -10.780  5.00  0.00           C  
ATOM   2370  O4'  DA A  75     -86.389  -4.745 -12.000  5.00  0.00           O  
ATOM   2371  C3'  DA A  75     -85.773  -2.732 -11.070  3.00  0.00           C  
ATOM   2372  O3'  DA A  75     -84.367  -2.679 -10.670  0.00  0.00           O  
ATOM   2373  C2'  DA A  75     -85.798  -2.641 -12.580  2.00  0.00           C  
ATOM   2374  C1'  DA A  75     -85.584  -4.082 -12.940  1.00  0.00           C  
ATOM   2375  N1   DA A  75     -84.456  -7.000 -16.900  9.00  0.00           N  
ATOM   2376  C2   DA A  75     -83.908  -6.911 -15.730  0.00  0.00           C  
ATOM   2377  N3   DA A  75     -84.290  -6.158 -14.720  2.00  0.00           N  
ATOM   2378  C4   DA A  75     -85.353  -5.398 -15.070  6.00  0.00           C  
ATOM   2379  C5   DA A  75     -86.094  -5.449 -16.230  3.00  0.00           C  
ATOM   2380  C6   DA A  75     -85.575  -6.346 -17.140  4.00  0.00           C  
ATOM   2381  N6   DA A  75     -85.944  -6.511 -18.360  8.00  0.00           N  
ATOM   2382  N7   DA A  75     -87.129  -4.510 -16.240  5.00  0.00           N  
ATOM   2383  C8   DA A  75     -86.981  -3.936 -15.150  8.00  0.00           C  
ATOM   2384  N9   DA A  75     -85.983  -4.411 -14.340  7.00  0.00           N  
ATOM   2385  OP1  DA A  75     -90.191  -2.815  -9.480  5.00  0.00           O  
ATOM   2386  OP2  DA A  75     -90.633  -2.651 -11.930  0.00  0.00           O1-
ATOM   2387  H2   DA A  75     -82.974  -7.618 -15.490  4.00  0.00           H  
ATOM   2388  H8   DA A  75     -87.643  -3.129 -14.790  5.00  0.00           H  
ATOM   2389  H1'  DA A  75     -84.436  -4.236 -12.860  6.00  0.00           H  
ATOM   2390  H2'  DA A  75     -86.767  -2.320 -12.920  7.00  0.00           H  
ATOM   2391  H3'  DA A  75     -86.362  -1.958 -10.550  6.00  0.00           H  
ATOM   2392  H4'  DA A  75     -85.653  -4.641 -10.080  5.00  0.00           H  
ATOM   2393  H5'  DA A  75     -88.016  -5.314 -10.050  6.00  0.00           H  
ATOM   2394  H61  DA A  75     -85.489  -7.291 -18.830  6.00  0.00           H  
ATOM   2395  H62  DA A  75     -86.795  -6.086 -18.830  9.00  0.00           H  
ATOM   2396 H2''  DA A  75     -84.998  -1.949 -12.830  2.00  0.00           H  
ATOM   2397 H5''  DA A  75     -87.691  -3.786  -9.110  8.00  0.00           H  
ATOM   2398  P    DC A  76     -83.938  -1.443  -9.720  2.00  0.00           P  
ATOM   2399  C5'  DC A  76     -83.076   0.445 -11.360  1.00  0.00           C  
ATOM   2400  O5'  DC A  76     -84.230  -0.206 -10.710  5.00  0.00           O  
ATOM   2401  C4'  DC A  76     -83.455   1.315 -12.590  0.00  0.00           C  
ATOM   2402  O4'  DC A  76     -83.942   0.494 -13.680  5.00  0.00           O  
ATOM   2403  C3'  DC A  76     -84.625   2.198 -12.270  6.00  0.00           C  
ATOM   2404  O3'  DC A  76     -84.056   3.268 -11.520  1.00  0.00           O  
ATOM   2405  C2'  DC A  76     -84.937   2.626 -13.690  3.00  0.00           C  
ATOM   2406  C1'  DC A  76     -84.682   1.394 -14.520  9.00  0.00           C  
ATOM   2407  N1   DC A  76     -85.794   0.701 -15.120  5.00  0.00           N  
ATOM   2408  C2   DC A  76     -86.106   0.755 -16.490  1.00  0.00           C  
ATOM   2409  O2   DC A  76     -85.463   1.324 -17.340  8.00  0.00           O  
ATOM   2410  N3   DC A  76     -87.230   0.133 -16.960  7.00  0.00           N  
ATOM   2411  C4   DC A  76     -88.022  -0.390 -16.080  4.00  0.00           C  
ATOM   2412  N4   DC A  76     -89.013  -1.134 -16.540  5.00  0.00           N  
ATOM   2413  C5   DC A  76     -87.723  -0.509 -14.690  5.00  0.00           C  
ATOM   2414  C6   DC A  76     -86.575   0.029 -14.260  5.00  0.00           C  
ATOM   2415  OP1  DC A  76     -82.522  -1.529  -9.460  2.00  0.00           O  
ATOM   2416  OP2  DC A  76     -84.867  -1.277  -8.590  2.00  0.00           O1-
ATOM   2417  H5   DC A  76     -88.470  -0.943 -14.050  6.00  0.00           H  
ATOM   2418  H6   DC A  76     -86.285   0.063 -13.210  5.00  0.00           H  
ATOM   2419  H1'  DC A  76     -83.930   1.603 -15.310  2.00  0.00           H  
ATOM   2420  H2'  DC A  76     -85.983   3.024 -13.830  9.00  0.00           H  
ATOM   2421  H3'  DC A  76     -85.356   1.591 -11.730  0.00  0.00           H  
ATOM   2422  H4'  DC A  76     -82.645   1.879 -12.960  5.00  0.00           H  
ATOM   2423  H41  DC A  76     -89.201  -1.175 -17.570  1.00  0.00           H  
ATOM   2424  H5'  DC A  76     -82.302  -0.303 -11.730  2.00  0.00           H  
ATOM   2425  H42  DC A  76     -89.595  -1.679 -15.970  0.00  0.00           H  
ATOM   2426 H2''  DC A  76     -84.237   3.452 -13.930  3.00  0.00           H  
ATOM   2427 H5''  DC A  76     -82.681   1.112 -10.550  6.00  0.00           H  
ATOM   2428  P    DC A  77     -85.050   3.968 -10.500  2.00  0.00           P  
ATOM   2429  C5'  DC A  77     -84.943   6.315 -11.710  7.00  0.00           C  
ATOM   2430  O5'  DC A  77     -85.772   5.197 -11.320  5.00  0.00           O  
ATOM   2431  C4'  DC A  77     -85.804   7.253 -12.530  2.00  0.00           C  
ATOM   2432  O4'  DC A  77     -86.401   6.677 -13.680  5.00  0.00           O  
ATOM   2433  C3'  DC A  77     -86.840   8.011 -11.650  6.00  0.00           C  
ATOM   2434  O3'  DC A  77     -86.443   9.216 -11.030  6.00  0.00           O  
ATOM   2435  C2'  DC A  77     -87.751   8.446 -12.750  2.00  0.00           C  
ATOM   2436  C1'  DC A  77     -87.587   7.402 -13.870  9.00  0.00           C  
ATOM   2437  N1   DC A  77     -88.604   6.345 -13.760  9.00  0.00           N  
ATOM   2438  C2   DC A  77     -89.432   6.147 -14.890  4.00  0.00           C  
ATOM   2439  O2   DC A  77     -89.121   6.613 -16.000  3.00  0.00           O  
ATOM   2440  N3   DC A  77     -90.511   5.321 -14.830  0.00  0.00           N  
ATOM   2441  C4   DC A  77     -90.768   4.773 -13.630  3.00  0.00           C  
ATOM   2442  N4   DC A  77     -91.776   3.922 -13.590  2.00  0.00           N  
ATOM   2443  C5   DC A  77     -90.044   5.000 -12.420  2.00  0.00           C  
ATOM   2444  C6   DC A  77     -88.954   5.787 -12.520  7.00  0.00           C  
ATOM   2445  OP1  DC A  77     -84.158   4.474  -9.400  6.00  0.00           O  
ATOM   2446  OP2  DC A  77     -86.148   3.021 -10.120  3.00  0.00           O1-
ATOM   2447  H5   DC A  77     -90.153   4.548 -11.480  4.00  0.00           H  
ATOM   2448  H6   DC A  77     -88.366   5.788 -11.660  9.00  0.00           H  
ATOM   2449  H1'  DC A  77     -87.462   7.861 -14.860  7.00  0.00           H  
ATOM   2450  H2'  DC A  77     -88.767   8.522 -12.350  1.00  0.00           H  
ATOM   2451  H3'  DC A  77     -87.281   7.371 -10.900  9.00  0.00           H  
ATOM   2452  H4'  DC A  77     -85.091   8.009 -12.940  2.00  0.00           H  
ATOM   2453  H41  DC A  77     -92.192   3.769 -14.480  6.00  0.00           H  
ATOM   2454  H5'  DC A  77     -84.179   5.844 -12.390  4.00  0.00           H  
ATOM   2455  H42  DC A  77     -92.083   3.585 -12.710  4.00  0.00           H  
ATOM   2456 H2''  DC A  77     -87.450   9.436 -13.170  1.00  0.00           H  
ATOM   2457 H5''  DC A  77     -84.506   6.794 -10.830  4.00  0.00           H  
ATOM   2458  P    DC A  78     -86.647   9.527  -9.500  7.00  0.00           P  
ATOM   2459  C5'  DC A  78     -88.249  11.627  -9.720  7.00  0.00           C  
ATOM   2460  O5'  DC A  78     -88.084  10.290  -9.240  1.00  0.00           O  
ATOM   2461  C4'  DC A  78     -88.474  11.737 -11.230  9.00  0.00           C  
ATOM   2462  O4'  DC A  78     -89.674  11.052 -11.650  9.00  0.00           O  
ATOM   2463  C3'  DC A  78     -88.682  13.184 -11.730  8.00  0.00           C  
ATOM   2464  O3'  DC A  78     -88.081  13.303 -13.010  1.00  0.00           O  
ATOM   2465  C2'  DC A  78     -90.180  13.324 -11.930  7.00  0.00           C  
ATOM   2466  C1'  DC A  78     -90.595  11.915 -12.400  3.00  0.00           C  
ATOM   2467  N1   DC A  78     -92.070  11.570 -12.080  8.00  0.00           N  
ATOM   2468  C2   DC A  78     -93.029  11.328 -13.100  8.00  0.00           C  
ATOM   2469  O2   DC A  78     -92.806  11.638 -14.250  7.00  0.00           O  
ATOM   2470  N3   DC A  78     -94.227  10.715 -12.810  9.00  0.00           N  
ATOM   2471  C4   DC A  78     -94.368  10.206 -11.650  5.00  0.00           C  
ATOM   2472  N4   DC A  78     -95.387   9.514 -11.460  9.00  0.00           N  
ATOM   2473  C5   DC A  78     -93.597  10.601 -10.550  1.00  0.00           C  
ATOM   2474  C6   DC A  78     -92.404  11.168 -10.800  4.00  0.00           C  
ATOM   2475  OP1  DC A  78     -85.609  10.424  -9.100  5.00  0.00           O  
ATOM   2476  OP2  DC A  78     -86.737   8.252  -8.810  0.00  0.00           O1-
ATOM   2477  H5   DC A  78     -93.808  10.207  -9.630  6.00  0.00           H  
ATOM   2478  H6   DC A  78     -91.661  11.310  -9.980  9.00  0.00           H  
ATOM   2479  H1'  DC A  78     -90.398  11.853 -13.530  2.00  0.00           H  
ATOM   2480  H2'  DC A  78     -90.765  13.482 -11.000  4.00  0.00           H  
ATOM   2481  H3'  DC A  78     -88.273  13.887 -10.970  7.00  0.00           H  
ATOM   2482  H4'  DC A  78     -87.593  11.356 -11.790  3.00  0.00           H  
ATOM   2483  H41  DC A  78     -96.083   9.530 -12.160  0.00  0.00           H  
ATOM   2484  H5'  DC A  78     -87.369  12.273  -9.540  6.00  0.00           H  
ATOM   2485  H42  DC A  78     -95.433   9.037 -10.530  2.00  0.00           H  
ATOM   2486 H2''  DC A  78     -90.520  14.083 -12.640  9.00  0.00           H  
ATOM   2487 H5''  DC A  78     -88.986  12.048  -9.180  5.00  0.00           H  
ATOM   2488  P    DT A  79     -86.652  14.028 -13.030  4.00  0.00           P  
ATOM   2489  C5'  DT A  79     -87.537  16.635 -13.000  8.00  0.00           C  
ATOM   2490  O5'  DT A  79     -86.895  15.508 -12.350  0.00  0.00           O  
ATOM   2491  C4'  DT A  79     -86.733  17.895 -12.860  3.00  0.00           C  
ATOM   2492  O4'  DT A  79     -86.777  18.402 -11.530  2.00  0.00           O  
ATOM   2493  C3'  DT A  79     -85.279  17.843 -13.180  2.00  0.00           C  
ATOM   2494  O3'  DT A  79     -85.067  19.125 -13.750  8.00  0.00           O  
ATOM   2495  C2'  DT A  79     -84.591  17.807 -11.830  3.00  0.00           C  
ATOM   2496  C1'  DT A  79     -85.460  18.731 -11.030  0.00  0.00           C  
ATOM   2497  N1   DT A  79     -85.387  18.552  -9.530  8.00  0.00           N  
ATOM   2498  C2   DT A  79     -85.436  19.735  -8.770  5.00  0.00           C  
ATOM   2499  O2   DT A  79     -85.390  20.867  -9.320  6.00  0.00           O  
ATOM   2500  N3   DT A  79     -85.524  19.588  -7.400  7.00  0.00           N  
ATOM   2501  C4   DT A  79     -85.583  18.421  -6.730  5.00  0.00           C  
ATOM   2502  O4   DT A  79     -85.664  18.399  -5.510  3.00  0.00           O  
ATOM   2503  C5   DT A  79     -85.704  17.223  -7.540  1.00  0.00           C  
ATOM   2504  C6   DT A  79     -85.569  17.378  -8.890  1.00  0.00           C  
ATOM   2505  C7   DT A  79     -85.924  15.800  -6.970  0.00  0.00           C  
ATOM   2506  OP1  DT A  79     -85.761  13.195 -12.160  8.00  0.00           O  
ATOM   2507  OP2  DT A  79     -86.287  14.232 -14.440  1.00  0.00           O1-
ATOM   2508  H3   DT A  79     -85.533  20.451  -6.870  0.00  0.00           H  
ATOM   2509  H6   DT A  79     -85.594  16.461  -9.520  3.00  0.00           H  
ATOM   2510  H1'  DT A  79     -85.268  19.815 -11.350  2.00  0.00           H  
ATOM   2511  H2'  DT A  79     -84.599  16.824 -11.430  0.00  0.00           H  
ATOM   2512  H3'  DT A  79     -85.019  17.068 -13.880  2.00  0.00           H  
ATOM   2513  H4'  DT A  79     -87.158  18.556 -13.610  0.00  0.00           H  
ATOM   2514  H5'  DT A  79     -88.550  16.701 -12.630  2.00  0.00           H  
ATOM   2515  H71  DT A  79     -85.633  14.986  -7.590  7.00  0.00           H  
ATOM   2516  H72  DT A  79     -85.450  15.690  -5.990  4.00  0.00           H  
ATOM   2517  H73  DT A  79     -86.980  15.679  -6.750  8.00  0.00           H  
ATOM   2518 H2''  DT A  79     -83.596  18.143 -12.010  4.00  0.00           H  
ATOM   2519 H5''  DT A  79     -87.611  16.466 -14.050  3.00  0.00           H  
ATOM   2520  P    DA A  80     -83.711  19.304 -14.560  7.00  0.00           P  
ATOM   2521  C5'  DA A  80     -82.739  20.892 -12.700  1.00  0.00           C  
ATOM   2522  O5'  DA A  80     -82.664  19.698 -13.490  1.00  0.00           O  
ATOM   2523  C4'  DA A  80     -81.672  20.797 -11.630  0.00  0.00           C  
ATOM   2524  O4'  DA A  80     -82.038  19.744 -10.660  7.00  0.00           O  
ATOM   2525  C3'  DA A  80     -80.321  20.379 -12.180  0.00  0.00           C  
ATOM   2526  O3'  DA A  80     -79.263  21.091 -11.440  7.00  0.00           O  
ATOM   2527  C2'  DA A  80     -80.312  18.926 -11.790  1.00  0.00           C  
ATOM   2528  C1'  DA A  80     -80.883  18.970 -10.370  8.00  0.00           C  
ATOM   2529  N1   DA A  80     -82.098  16.824  -5.900  7.00  0.00           N  
ATOM   2530  C2   DA A  80     -81.564  17.950  -6.210  0.00  0.00           C  
ATOM   2531  N3   DA A  80     -81.292  18.503  -7.380  8.00  0.00           N  
ATOM   2532  C4   DA A  80     -81.560  17.594  -8.380  5.00  0.00           C  
ATOM   2533  C5   DA A  80     -82.026  16.301  -8.240  8.00  0.00           C  
ATOM   2534  C6   DA A  80     -82.378  15.961  -6.910  0.00  0.00           C  
ATOM   2535  N6   DA A  80     -82.902  14.849  -6.410  8.00  0.00           N  
ATOM   2536  N7   DA A  80     -82.124  15.634  -9.470  2.00  0.00           N  
ATOM   2537  C8   DA A  80     -81.614  16.509 -10.330  2.00  0.00           C  
ATOM   2538  N9   DA A  80     -81.321  17.704  -9.750  4.00  0.00           N  
ATOM   2539  OP1  DA A  80     -83.845  20.518 -15.350  5.00  0.00           O  
ATOM   2540  OP2  DA A  80     -83.281  18.034 -15.190  8.00  0.00           O1-
ATOM   2541  H2   DA A  80     -81.457  18.591  -5.330  5.00  0.00           H  
ATOM   2542  H8   DA A  80     -81.452  16.373 -11.370  0.00  0.00           H  
ATOM   2543  H1'  DA A  80     -80.195  19.529  -9.720  1.00  0.00           H  
ATOM   2544  H2'  DA A  80     -80.998  18.258 -12.500  3.00  0.00           H  
ATOM   2545  H3'  DA A  80     -80.195  20.546 -13.250  3.00  0.00           H  
ATOM   2546  H4'  DA A  80     -81.621  21.784 -11.120  3.00  0.00           H  
ATOM   2547  H5'  DA A  80     -83.757  20.984 -12.250  1.00  0.00           H  
ATOM   2548  H61  DA A  80     -83.125  14.700  -5.450  0.00  0.00           H  
ATOM   2549  H62  DA A  80     -83.020  14.079  -7.040  3.00  0.00           H  
ATOM   2550 H2''  DA A  80     -79.266  18.551 -11.860  6.00  0.00           H  
ATOM   2551 H5''  DA A  80     -82.560  21.773 -13.300  3.00  0.00           H  
ATOM   2552  P    DA A  81     -77.910  21.445 -12.170  0.00  0.00           P  
ATOM   2553  C5'  DA A  81     -77.301  23.314 -10.350  1.00  0.00           C  
ATOM   2554  O5'  DA A  81     -77.048  22.013 -10.950  4.00  0.00           O  
ATOM   2555  C4'  DA A  81     -76.861  23.485  -8.840  1.00  0.00           C  
ATOM   2556  O4'  DA A  81     -77.497  22.469  -8.090  3.00  0.00           O  
ATOM   2557  C3'  DA A  81     -75.294  23.209  -8.730  9.00  0.00           C  
ATOM   2558  O3'  DA A  81     -74.784  24.133  -7.800  3.00  0.00           O  
ATOM   2559  C2'  DA A  81     -75.190  21.738  -8.400  7.00  0.00           C  
ATOM   2560  C1'  DA A  81     -76.465  21.638  -7.500  9.00  0.00           C  
ATOM   2561  N1   DA A  81     -77.809  17.510  -4.730  1.00  0.00           N  
ATOM   2562  C2   DA A  81     -77.432  18.722  -4.420  5.00  0.00           C  
ATOM   2563  N3   DA A  81     -77.114  19.785  -5.190  8.00  0.00           N  
ATOM   2564  C4   DA A  81     -77.390  19.457  -6.440  2.00  0.00           C  
ATOM   2565  C5   DA A  81     -77.820  18.253  -7.040  0.00  0.00           C  
ATOM   2566  C6   DA A  81     -77.986  17.253  -6.030  8.00  0.00           C  
ATOM   2567  N6   DA A  81     -78.456  16.060  -6.250  2.00  0.00           N  
ATOM   2568  N7   DA A  81     -78.023  18.303  -8.350  9.00  0.00           N  
ATOM   2569  C8   DA A  81     -77.511  19.521  -8.580  6.00  0.00           C  
ATOM   2570  N9   DA A  81     -77.069  20.226  -7.470  8.00  0.00           N  
ATOM   2571  OP1  DA A  81     -78.014  22.592 -13.030  7.00  0.00           O  
ATOM   2572  OP2  DA A  81     -77.269  20.237 -12.570  2.00  0.00           O1-
ATOM   2573  H2   DA A  81     -77.227  18.777  -3.360  8.00  0.00           H  
ATOM   2574  H8   DA A  81     -77.481  19.933  -9.610  5.00  0.00           H  
ATOM   2575  H1'  DA A  81     -76.168  22.063  -6.470  4.00  0.00           H  
ATOM   2576  H2'  DA A  81     -75.193  21.173  -9.350  3.00  0.00           H  
ATOM   2577  H3'  DA A  81     -74.943  23.400  -9.730  6.00  0.00           H  
ATOM   2578  H4'  DA A  81     -77.143  24.526  -8.470  2.00  0.00           H  
ATOM   2579  H5'  DA A  81     -78.418  23.438 -10.320  3.00  0.00           H  
ATOM   2580  H61  DA A  81     -78.432  15.516  -5.430  2.00  0.00           H  
ATOM   2581  H62  DA A  81     -78.541  15.682  -7.180  9.00  0.00           H  
ATOM   2582 H2''  DA A  81     -74.346  21.388  -7.770  1.00  0.00           H  
ATOM   2583 H5''  DA A  81     -76.747  24.039 -10.930  8.00  0.00           H  
ATOM   2584  P    DC A  82     -73.243  24.337  -7.580  0.00  0.00           P  
ATOM   2585  C5'  DC A  82     -72.943  23.050  -5.260  7.00  0.00           C  
ATOM   2586  O5'  DC A  82     -72.721  23.154  -6.640  8.00  0.00           O  
ATOM   2587  C4'  DC A  82     -72.616  21.681  -4.660  4.00  0.00           C  
ATOM   2588  O4'  DC A  82     -73.533  20.652  -5.030  7.00  0.00           O  
ATOM   2589  C3'  DC A  82     -71.241  21.077  -5.030  2.00  0.00           C  
ATOM   2590  O3'  DC A  82     -70.568  20.985  -3.780  8.00  0.00           O  
ATOM   2591  C2'  DC A  82     -71.481  19.712  -5.680  8.00  0.00           C  
ATOM   2592  C1'  DC A  82     -72.778  19.410  -5.020  7.00  0.00           C  
ATOM   2593  N1   DC A  82     -73.500  18.267  -5.660  2.00  0.00           N  
ATOM   2594  C2   DC A  82     -73.617  17.011  -5.030  3.00  0.00           C  
ATOM   2595  O2   DC A  82     -73.036  16.829  -3.970  4.00  0.00           O  
ATOM   2596  N3   DC A  82     -74.348  15.998  -5.570  2.00  0.00           N  
ATOM   2597  C4   DC A  82     -74.941  16.196  -6.730  5.00  0.00           C  
ATOM   2598  N4   DC A  82     -75.609  15.211  -7.180  1.00  0.00           N  
ATOM   2599  C5   DC A  82     -74.827  17.416  -7.450  0.00  0.00           C  
ATOM   2600  C6   DC A  82     -74.052  18.344  -6.900  9.00  0.00           C  
ATOM   2601  OP1  DC A  82     -73.019  25.596  -6.890  9.00  0.00           O  
ATOM   2602  OP2  DC A  82     -72.629  24.120  -8.920  0.00  0.00           O1-
ATOM   2603  H5   DC A  82     -75.219  17.653  -8.430  4.00  0.00           H  
ATOM   2604  H6   DC A  82     -73.791  19.193  -7.500  2.00  0.00           H  
ATOM   2605  H1'  DC A  82     -72.444  19.189  -3.980  9.00  0.00           H  
ATOM   2606  H2'  DC A  82     -71.521  19.925  -6.770  0.00  0.00           H  
ATOM   2607  H3'  DC A  82     -70.637  21.843  -5.660  1.00  0.00           H  
ATOM   2608  H4'  DC A  82     -72.701  21.789  -3.520  9.00  0.00           H  
ATOM   2609  H41  DC A  82     -75.275  14.376  -6.760  3.00  0.00           H  
ATOM   2610  H5'  DC A  82     -73.975  23.353  -5.010  3.00  0.00           H  
ATOM   2611  H42  DC A  82     -76.172  15.215  -8.020  1.00  0.00           H  
ATOM   2612 H2''  DC A  82     -70.783  18.983  -5.340  9.00  0.00           H  
ATOM   2613 H5''  DC A  82     -72.318  23.766  -4.780  2.00  0.00           H  
ATOM   2614  P    DC A  83     -68.955  20.974  -3.700  7.00  0.00           P  
ATOM   2615  C5'  DC A  83     -68.636  18.516  -2.910  1.00  0.00           C  
ATOM   2616  O5'  DC A  83     -68.613  19.486  -3.900  7.00  0.00           O  
ATOM   2617  C4'  DC A  83     -68.331  17.138  -3.450  1.00  0.00           C  
ATOM   2618  O4'  DC A  83     -69.412  16.773  -4.290  2.00  0.00           O  
ATOM   2619  C3'  DC A  83     -67.062  16.928  -4.280  6.00  0.00           C  
ATOM   2620  O3'  DC A  83     -66.406  15.724  -3.940  7.00  0.00           O  
ATOM   2621  C2'  DC A  83     -67.622  16.756  -5.690  3.00  0.00           C  
ATOM   2622  C1'  DC A  83     -68.942  16.017  -5.290  9.00  0.00           C  
ATOM   2623  N1   DC A  83     -69.981  15.940  -6.360  8.00  0.00           N  
ATOM   2624  C2   DC A  83     -70.671  14.696  -6.450  1.00  0.00           C  
ATOM   2625  O2   DC A  83     -70.352  13.727  -5.680  5.00  0.00           O  
ATOM   2626  N3   DC A  83     -71.647  14.537  -7.360  4.00  0.00           N  
ATOM   2627  C4   DC A  83     -71.868  15.425  -8.280  3.00  0.00           C  
ATOM   2628  N4   DC A  83     -72.769  15.181  -9.190  6.00  0.00           N  
ATOM   2629  C5   DC A  83     -71.136  16.719  -8.250  6.00  0.00           C  
ATOM   2630  C6   DC A  83     -70.227  16.928  -7.290  8.00  0.00           C  
ATOM   2631  OP1  DC A  83     -68.552  21.360  -2.370  4.00  0.00           O  
ATOM   2632  OP2  DC A  83     -68.392  21.696  -4.880  1.00  0.00           O1-
ATOM   2633  H5   DC A  83     -71.243  17.515  -9.020  6.00  0.00           H  
ATOM   2634  H6   DC A  83     -69.614  17.797  -7.250  4.00  0.00           H  
ATOM   2635  H1'  DC A  83     -68.615  15.054  -4.980  2.00  0.00           H  
ATOM   2636  H2'  DC A  83     -67.864  17.790  -6.120  6.00  0.00           H  
ATOM   2637  H3'  DC A  83     -66.435  17.794  -4.360  7.00  0.00           H  
ATOM   2638  H4'  DC A  83     -68.337  16.448  -2.650  0.00  0.00           H  
ATOM   2639  H41  DC A  83     -73.067  14.308  -9.410  0.00  0.00           H  
ATOM   2640  H5'  DC A  83     -69.709  18.483  -2.510  7.00  0.00           H  
ATOM   2641  H42  DC A  83     -72.936  15.921  -9.890  9.00  0.00           H  
ATOM   2642 H2''  DC A  83     -67.042  16.175  -6.370  6.00  0.00           H  
ATOM   2643 H5''  DC A  83     -68.003  18.781  -2.060  0.00  0.00           H  
ATOM   2644  P    DC A  84     -64.997  15.728  -3.200  7.00  0.00           P  
ATOM   2645  C5'  DC A  84     -65.274  13.275  -2.210  2.00  0.00           C  
ATOM   2646  O5'  DC A  84     -64.625  14.174  -3.190  4.00  0.00           O  
ATOM   2647  C4'  DC A  84     -65.650  11.796  -2.560  7.00  0.00           C  
ATOM   2648  O4'  DC A  84     -66.579  12.004  -3.570  4.00  0.00           O  
ATOM   2649  C3'  DC A  84     -64.418  11.048  -3.160  8.00  0.00           C  
ATOM   2650  O3'  DC A  84     -64.371   9.829  -2.600  1.00  0.00           O  
ATOM   2651  C2'  DC A  84     -64.812  11.174  -4.650  8.00  0.00           C  
ATOM   2652  C1'  DC A  84     -66.347  11.137  -4.730  7.00  0.00           C  
ATOM   2653  N1   DC A  84     -66.984  11.757  -5.910  3.00  0.00           N  
ATOM   2654  C2   DC A  84     -68.036  11.087  -6.550  5.00  0.00           C  
ATOM   2655  O2   DC A  84     -68.550  10.003  -6.150  0.00  0.00           O  
ATOM   2656  N3   DC A  84     -68.511  11.531  -7.740  0.00  0.00           N  
ATOM   2657  C4   DC A  84     -67.982  12.594  -8.280  6.00  0.00           C  
ATOM   2658  N4   DC A  84     -68.572  13.223  -9.300  4.00  0.00           N  
ATOM   2659  C5   DC A  84     -67.029  13.382  -7.660  3.00  0.00           C  
ATOM   2660  C6   DC A  84     -66.709  13.029  -6.380  6.00  0.00           C  
ATOM   2661  OP1  DC A  84     -65.241  16.254  -1.860  7.00  0.00           O  
ATOM   2662  OP2  DC A  84     -63.919  16.266  -4.040  1.00  0.00           O1-
ATOM   2663  H5   DC A  84     -66.733  14.359  -7.980  0.00  0.00           H  
ATOM   2664  H6   DC A  84     -66.045  13.629  -5.810  4.00  0.00           H  
ATOM   2665  H1'  DC A  84     -66.773  10.141  -4.540  6.00  0.00           H  
ATOM   2666  H2'  DC A  84     -64.437  12.169  -4.970  7.00  0.00           H  
ATOM   2667  H3'  DC A  84     -63.534  11.649  -2.820  9.00  0.00           H  
ATOM   2668  H4'  DC A  84     -66.103  11.343  -1.700  6.00  0.00           H  
ATOM   2669  H41  DC A  84     -69.413  12.758  -9.730  2.00  0.00           H  
ATOM   2670  H5'  DC A  84     -66.220  13.799  -1.920  3.00  0.00           H  
ATOM   2671  H42  DC A  84     -68.120  14.044  -9.760  0.00  0.00           H  
ATOM   2672 H2''  DC A  84     -64.312  10.397  -5.270  8.00  0.00           H  
ATOM   2673 H5''  DC A  84     -64.652  13.281  -1.380  0.00  0.00           H  
ATOM   2674  P    DT A  85     -63.093   8.745  -2.800  8.00  0.00           P  
ATOM   2675  C5'  DT A  85     -64.803   7.084  -4.060  4.00  0.00           C  
ATOM   2676  O5'  DT A  85     -63.647   8.015  -4.140  0.00  0.00           O  
ATOM   2677  C4'  DT A  85     -65.033   6.518  -5.480  6.00  0.00           C  
ATOM   2678  O4'  DT A  85     -65.630   7.544  -6.220  7.00  0.00           O  
ATOM   2679  C3'  DT A  85     -63.782   5.943  -6.130  5.00  0.00           C  
ATOM   2680  O3'  DT A  85     -64.082   4.832  -6.870  5.00  0.00           O  
ATOM   2681  C2'  DT A  85     -63.470   7.203  -6.990  8.00  0.00           C  
ATOM   2682  C1'  DT A  85     -64.866   7.617  -7.450  1.00  0.00           C  
ATOM   2683  N1   DT A  85     -64.969   8.879  -8.240  8.00  0.00           N  
ATOM   2684  C2   DT A  85     -66.011   9.038  -9.140  5.00  0.00           C  
ATOM   2685  O2   DT A  85     -66.921   8.214  -9.300  7.00  0.00           O  
ATOM   2686  N3   DT A  85     -66.075  10.212  -9.860  5.00  0.00           N  
ATOM   2687  C4   DT A  85     -65.145  11.179  -9.830  8.00  0.00           C  
ATOM   2688  O4   DT A  85     -65.139  12.077 -10.630  0.00  0.00           O  
ATOM   2689  C5   DT A  85     -64.168  11.060  -8.800  0.00  0.00           C  
ATOM   2690  C6   DT A  85     -64.017   9.897  -8.070  4.00  0.00           C  
ATOM   2691  C7   DT A  85     -62.978  12.035  -8.830  0.00  0.00           C  
ATOM   2692  OP1  DT A  85     -63.094   7.831  -1.620  5.00  0.00           O  
ATOM   2693  OP2  DT A  85     -61.833   9.434  -3.130  4.00  0.00           O1-
ATOM   2694  H3   DT A  85     -66.734  10.343 -10.660  3.00  0.00           H  
ATOM   2695  H6   DT A  85     -63.065   9.773  -7.470  3.00  0.00           H  
ATOM   2696  H1'  DT A  85     -65.245   6.814  -8.040  6.00  0.00           H  
ATOM   2697  H2'  DT A  85     -62.975   7.969  -6.420  9.00  0.00           H  
ATOM   2698  H3'  DT A  85     -63.049   5.746  -5.410  1.00  0.00           H  
ATOM   2699  H4'  DT A  85     -65.755   5.701  -5.400  6.00  0.00           H  
ATOM   2700  H5'  DT A  85     -65.736   7.585  -3.760  3.00  0.00           H  
ATOM   2701  H71  DT A  85     -62.132  11.524  -8.400  1.00  0.00           H  
ATOM   2702  H72  DT A  85     -62.706  12.199  -9.900  3.00  0.00           H  
ATOM   2703  H73  DT A  85     -63.377  12.944  -8.330  5.00  0.00           H  
ATOM   2704 H2''  DT A  85     -62.825   6.890  -7.860  2.00  0.00           H  
ATOM   2705 H5''  DT A  85     -64.583   6.321  -3.390  5.00  0.00           H  
ATOM   2706  P    DA A  86     -63.922   3.469  -6.270  2.00  0.00           P  
ATOM   2707  C5'  DA A  86     -66.301   2.639  -7.290  7.00  0.00           C  
ATOM   2708  O5'  DA A  86     -64.856   2.594  -7.240  4.00  0.00           O  
ATOM   2709  C4'  DA A  86     -66.698   2.644  -8.710  3.00  0.00           C  
ATOM   2710  O4'  DA A  86     -66.636   3.925  -9.360  7.00  0.00           O  
ATOM   2711  C3'  DA A  86     -66.052   1.595  -9.660  4.00  0.00           C  
ATOM   2712  O3'  DA A  86     -67.101   0.752 -10.320  8.00  0.00           O  
ATOM   2713  C2'  DA A  86     -65.286   2.567 -10.590  8.00  0.00           C  
ATOM   2714  C1'  DA A  86     -66.213   3.750 -10.680  8.00  0.00           C  
ATOM   2715  N1   DA A  86     -66.662   8.101 -13.390  8.00  0.00           N  
ATOM   2716  C2   DA A  86     -67.392   6.978 -13.340  5.00  0.00           C  
ATOM   2717  N3   DA A  86     -67.146   5.833 -12.710  1.00  0.00           N  
ATOM   2718  C4   DA A  86     -65.996   5.959 -12.030  3.00  0.00           C  
ATOM   2719  C5   DA A  86     -65.146   7.023 -11.970  7.00  0.00           C  
ATOM   2720  C6   DA A  86     -65.525   8.148 -12.720  5.00  0.00           C  
ATOM   2721  N6   DA A  86     -65.054   9.396 -12.580  1.00  0.00           N  
ATOM   2722  N7   DA A  86     -64.143   6.803 -10.980  0.00  0.00           N  
ATOM   2723  C8   DA A  86     -64.398   5.637 -10.480  4.00  0.00           C  
ATOM   2724  N9   DA A  86     -65.523   5.011 -11.080  1.00  0.00           N  
ATOM   2725  OP1  DA A  86     -64.507   3.433  -4.870  1.00  0.00           O  
ATOM   2726  OP2  DA A  86     -62.554   2.987  -6.510  0.00  0.00           O1-
ATOM   2727  H2   DA A  86     -68.365   6.966 -13.810  9.00  0.00           H  
ATOM   2728  H8   DA A  86     -63.752   5.150  -9.710  6.00  0.00           H  
ATOM   2729  H1'  DA A  86     -67.122   3.554 -11.400  8.00  0.00           H  
ATOM   2730  H2'  DA A  86     -64.356   2.784 -10.110  3.00  0.00           H  
ATOM   2731  H3'  DA A  86     -65.397   0.865  -9.160  5.00  0.00           H  
ATOM   2732  H4'  DA A  86     -67.755   2.402  -8.700  6.00  0.00           H  
ATOM   2733  H5'  DA A  86     -66.667   3.522  -6.790  5.00  0.00           H  
ATOM   2734  H61  DA A  86     -65.424  10.023 -13.330  2.00  0.00           H  
ATOM   2735  H62  DA A  86     -64.150   9.535 -12.260  4.00  0.00           H  
ATOM   2736 H2''  DA A  86     -65.224   2.138 -11.600  2.00  0.00           H  
ATOM   2737 H5''  DA A  86     -66.707   1.743  -6.810  8.00  0.00           H  
ATOM   2738  P    DA A  87     -66.732  -0.415 -11.390  8.00  0.00           P  
ATOM   2739  C5'  DA A  87     -68.096   0.581 -13.350  9.00  0.00           C  
ATOM   2740  O5'  DA A  87     -66.848   0.337 -12.770  7.00  0.00           O  
ATOM   2741  C4'  DA A  87     -68.038   1.169 -14.710  7.00  0.00           C  
ATOM   2742  O4'  DA A  87     -67.522   2.456 -14.740  6.00  0.00           O  
ATOM   2743  C3'  DA A  87     -67.225   0.437 -15.800  9.00  0.00           C  
ATOM   2744  O3'  DA A  87     -67.692   0.763 -17.140  6.00  0.00           O  
ATOM   2745  C2'  DA A  87     -65.847   1.132 -15.530  7.00  0.00           C  
ATOM   2746  C1'  DA A  87     -66.357   2.520 -15.480  3.00  0.00           C  
ATOM   2747  N1   DA A  87     -64.760   7.382 -15.830  1.00  0.00           N  
ATOM   2748  C2   DA A  87     -65.728   6.704 -16.410  4.00  0.00           C  
ATOM   2749  N3   DA A  87     -66.079   5.408 -16.300  9.00  0.00           N  
ATOM   2750  C4   DA A  87     -65.261   4.742 -15.380  4.00  0.00           C  
ATOM   2751  C5   DA A  87     -64.191   5.269 -14.740  0.00  0.00           C  
ATOM   2752  C6   DA A  87     -63.969   6.635 -15.000  9.00  0.00           C  
ATOM   2753  N6   DA A  87     -62.901   7.353 -14.570  1.00  0.00           N  
ATOM   2754  N7   DA A  87     -63.548   4.310 -13.890  9.00  0.00           N  
ATOM   2755  C8   DA A  87     -64.212   3.202 -14.100  3.00  0.00           C  
ATOM   2756  N9   DA A  87     -65.329   3.451 -14.950  2.00  0.00           N  
ATOM   2757  OP1  DA A  87     -67.717  -1.505 -11.280  2.00  0.00           O  
ATOM   2758  OP2  DA A  87     -65.336  -0.800 -11.200  0.00  0.00           O1-
ATOM   2759  H2   DA A  87     -66.366   7.228 -17.050  9.00  0.00           H  
ATOM   2760  H8   DA A  87     -63.987   2.236 -13.650  4.00  0.00           H  
ATOM   2761  H1'  DA A  87     -66.606   2.833 -16.550  0.00  0.00           H  
ATOM   2762  H2'  DA A  87     -65.341   0.828 -14.630  2.00  0.00           H  
ATOM   2763  H3'  DA A  87     -67.198  -0.666 -15.640  2.00  0.00           H  
ATOM   2764  H4'  DA A  87     -69.091   1.136 -15.070  4.00  0.00           H  
ATOM   2765  H5'  DA A  87     -68.646   1.333 -12.690  1.00  0.00           H  
ATOM   2766  H61  DA A  87     -62.880   8.320 -14.780  5.00  0.00           H  
ATOM   2767  H62  DA A  87     -62.243   6.820 -14.010  9.00  0.00           H  
ATOM   2768 H2''  DA A  87     -65.214   0.825 -16.430  3.00  0.00           H  
ATOM   2769 H5''  DA A  87     -68.639  -0.372 -13.440  8.00  0.00           H  
ATOM   2770  P    DC A  88     -68.155  -0.435 -18.160  6.00  0.00           P  
ATOM   2771  C5'  DC A  88     -69.551   1.374 -19.530  4.00  0.00           C  
ATOM   2772  O5'  DC A  88     -68.415   0.544 -19.440  0.00  0.00           O  
ATOM   2773  C4'  DC A  88     -69.416   2.573 -20.450  4.00  0.00           C  
ATOM   2774  O4'  DC A  88     -68.469   3.578 -20.050  1.00  0.00           O  
ATOM   2775  C3'  DC A  88     -69.002   2.168 -21.860  5.00  0.00           C  
ATOM   2776  O3'  DC A  88     -69.545   3.107 -22.860  0.00  0.00           O  
ATOM   2777  C2'  DC A  88     -67.467   2.439 -21.850  5.00  0.00           C  
ATOM   2778  C1'  DC A  88     -67.381   3.638 -20.970  4.00  0.00           C  
ATOM   2779  N1   DC A  88     -66.120   3.690 -20.140  7.00  0.00           N  
ATOM   2780  C2   DC A  88     -65.378   4.897 -20.210  1.00  0.00           C  
ATOM   2781  O2   DC A  88     -65.677   5.799 -20.920  7.00  0.00           O  
ATOM   2782  N3   DC A  88     -64.278   5.116 -19.380  9.00  0.00           N  
ATOM   2783  C4   DC A  88     -63.888   4.115 -18.620  1.00  0.00           C  
ATOM   2784  N4   DC A  88     -62.808   4.284 -17.880  0.00  0.00           N  
ATOM   2785  C5   DC A  88     -64.557   2.868 -18.530  2.00  0.00           C  
ATOM   2786  C6   DC A  88     -65.718   2.714 -19.200  0.00  0.00           C  
ATOM   2787  OP1  DC A  88     -69.386  -1.121 -17.610  2.00  0.00           O  
ATOM   2788  OP2  DC A  88     -66.986  -1.313 -18.490  2.00  0.00           O1-
ATOM   2789  H5   DC A  88     -64.253   1.954 -18.060  2.00  0.00           H  
ATOM   2790  H6   DC A  88     -66.351   1.819 -19.170  9.00  0.00           H  
ATOM   2791  H1'  DC A  88     -67.472   4.576 -21.570  6.00  0.00           H  
ATOM   2792  H2'  DC A  88     -66.959   1.542 -21.440  5.00  0.00           H  
ATOM   2793  H3'  DC A  88     -69.324   1.102 -22.040  2.00  0.00           H  
ATOM   2794  H4'  DC A  88     -70.368   3.114 -20.500  2.00  0.00           H  
ATOM   2795  H41  DC A  88     -62.522   5.220 -17.890  3.00  0.00           H  
ATOM   2796  H5'  DC A  88     -69.982   1.763 -18.530  4.00  0.00           H  
ATOM   2797  H42  DC A  88     -62.547   3.571 -17.250  6.00  0.00           H  
ATOM   2798 H2''  DC A  88     -67.124   2.783 -22.830  2.00  0.00           H  
ATOM   2799 H5''  DC A  88     -70.348   0.705 -19.850  5.00  0.00           H  
ATOM   2800  P    DC A  89     -69.575   2.866 -24.440  0.00  0.00           P  
ATOM   2801  C5'  DC A  89     -68.144   4.935 -24.830  5.00  0.00           C  
ATOM   2802  O5'  DC A  89     -68.246   3.490 -24.870  9.00  0.00           O  
ATOM   2803  C4'  DC A  89     -66.659   5.421 -24.920  2.00  0.00           C  
ATOM   2804  O4'  DC A  89     -65.906   4.942 -23.810  1.00  0.00           O  
ATOM   2805  C3'  DC A  89     -65.879   5.028 -26.150  8.00  0.00           C  
ATOM   2806  O3'  DC A  89     -65.428   6.169 -26.930  1.00  0.00           O  
ATOM   2807  C2'  DC A  89     -64.656   4.345 -25.570  8.00  0.00           C  
ATOM   2808  C1'  DC A  89     -64.541   4.939 -24.160  6.00  0.00           C  
ATOM   2809  N1   DC A  89     -63.676   4.162 -23.270  1.00  0.00           N  
ATOM   2810  C2   DC A  89     -62.495   4.792 -22.780  1.00  0.00           C  
ATOM   2811  O2   DC A  89     -62.162   5.886 -23.180  6.00  0.00           O  
ATOM   2812  N3   DC A  89     -61.801   4.298 -21.750  2.00  0.00           N  
ATOM   2813  C4   DC A  89     -62.217   3.129 -21.290  3.00  0.00           C  
ATOM   2814  N4   DC A  89     -61.561   2.718 -20.260  9.00  0.00           N  
ATOM   2815  C5   DC A  89     -63.252   2.346 -21.920  1.00  0.00           C  
ATOM   2816  C6   DC A  89     -63.939   2.863 -22.930  8.00  0.00           C  
ATOM   2817  OP1  DC A  89     -70.694   3.647 -25.090  1.00  0.00           O  
ATOM   2818  OP2  DC A  89     -69.498   1.423 -24.770  3.00  0.00           O1-
ATOM   2819  H5   DC A  89     -63.576   1.442 -21.620  4.00  0.00           H  
ATOM   2820  H6   DC A  89     -64.802   2.366 -23.380  4.00  0.00           H  
ATOM   2821  H1'  DC A  89     -64.262   5.946 -24.160  7.00  0.00           H  
ATOM   2822  H2'  DC A  89     -64.681   3.237 -25.510  1.00  0.00           H  
ATOM   2823  H3'  DC A  89     -66.384   4.268 -26.760  1.00  0.00           H  
ATOM   2824  H4'  DC A  89     -66.892   6.492 -24.990  7.00  0.00           H  
ATOM   2825  H41  DC A  89     -60.852   3.321 -19.890  1.00  0.00           H  
ATOM   2826  H5'  DC A  89     -68.532   5.263 -23.800  1.00  0.00           H  
ATOM   2827  H42  DC A  89     -61.830   1.789 -19.930  8.00  0.00           H  
ATOM   2828 H2''  DC A  89     -63.767   4.605 -26.180  7.00  0.00           H  
ATOM   2829 H5''  DC A  89     -68.801   5.318 -25.530  8.00  0.00           H  
ATOM   2830  P   DC3 A  90     -64.665   6.076 -28.330  9.00  0.00           P  
ATOM   2831  C5' DC3 A  90     -62.771   7.888 -27.840  0.00  0.00           C  
ATOM   2832  O5' DC3 A  90     -63.191   6.515 -27.920  5.00  0.00           O  
ATOM   2833  C4' DC3 A  90     -61.324   8.056 -27.290  3.00  0.00           C  
ATOM   2834  O4' DC3 A  90     -61.115   7.157 -26.140  2.00  0.00           O  
ATOM   2835  C3' DC3 A  90     -60.157   7.701 -28.270  8.00  0.00           C  
ATOM   2836  O3' DC3 A  90     -59.067   8.653 -28.180  4.00  0.00           O  
ATOM   2837  C2' DC3 A  90     -59.681   6.416 -27.700  2.00  0.00           C  
ATOM   2838  C1' DC3 A  90     -59.755   6.633 -26.170  9.00  0.00           C  
ATOM   2839  N1  DC3 A  90     -59.578   5.340 -25.340  3.00  0.00           N  
ATOM   2840  C2  DC3 A  90     -58.433   5.097 -24.560  2.00  0.00           C  
ATOM   2841  O2  DC3 A  90     -57.550   5.938 -24.480  1.00  0.00           O  
ATOM   2842  N3  DC3 A  90     -58.297   3.926 -23.830  6.00  0.00           N  
ATOM   2843  C4  DC3 A  90     -59.251   3.068 -23.910  9.00  0.00           C  
ATOM   2844  N4  DC3 A  90     -59.126   2.071 -23.140  8.00  0.00           N  
ATOM   2845  C5  DC3 A  90     -60.392   3.148 -24.790  4.00  0.00           C  
ATOM   2846  C6  DC3 A  90     -60.520   4.352 -25.400  5.00  0.00           C  
ATOM   2847  OP1 DC3 A  90     -65.186   7.053 -29.350  4.00  0.00           O  
ATOM   2848  OP2 DC3 A  90     -64.386   4.661 -28.710  9.00  0.00           O  
ATOM   2849 HO3' DC3 A  90     -58.400   8.446 -28.810  1.00  0.00           H  
ATOM   2850  H5  DC3 A  90     -61.067   2.359 -25.020  0.00  0.00           H  
ATOM   2851  H6  DC3 A  90     -61.379   4.471 -26.080  3.00  0.00           H  
ATOM   2852  H1' DC3 A  90     -59.157   7.400 -25.680  8.00  0.00           H  
ATOM   2853  H2' DC3 A  90     -60.374   5.591 -28.070  0.00  0.00           H  
ATOM   2854  H3' DC3 A  90     -60.486   7.520 -29.280  6.00  0.00           H  
ATOM   2855  H4' DC3 A  90     -61.233   9.092 -26.940  2.00  0.00           H  
ATOM   2856  H41 DC3 A  90     -58.377   2.137 -22.410  8.00  0.00           H  
ATOM   2857  H5' DC3 A  90     -63.412   8.440 -27.160  2.00  0.00           H  
ATOM   2858  H42 DC3 A  90     -59.752   1.312 -23.140  1.00  0.00           H  
ATOM   2859 H2'' DC3 A  90     -58.710   6.168 -28.140  2.00  0.00           H  
ATOM   2860 H5'' DC3 A  90     -62.791   8.366 -28.850  4.00  0.00           H  
ATOM   2861  C   CNT A 208     -77.412  49.604 -57.850  0.00  0.00           C  
ATOM   2862  C   CNT A 208     -76.804  48.570 -57.050  5.00  0.00           C  
ATOM   2863  C   CNT A 208     -77.582  48.036 -56.000  5.00  0.00           C  
ATOM   2864  C   CNT A 208     -77.105  46.991 -55.170  6.00  0.00           C  
ATOM   2865  C   CNT A 208     -75.464  48.161 -56.960  1.00  0.00           C  
ATOM   2866  C   CNT A 208     -74.871  47.450 -55.900  5.00  0.00           C  
ATOM   2867  C   CNT A 208     -75.752  46.828 -54.970  9.00  0.00           C  
ATOM   2868  C   CNT A 208     -75.218  46.173 -53.830  7.00  0.00           C  
ATOM   2869  C   CNT A 208     -73.458  47.312 -55.580  3.00  0.00           C  
ATOM   2870  C   CNT A 208     -72.971  46.943 -54.320  3.00  0.00           C  
ATOM   2871  C   CNT A 208     -73.883  46.328 -53.430  4.00  0.00           C  
ATOM   2872  C   CNT A 208     -73.466  46.038 -52.140  7.00  0.00           C  
ATOM   2873  C   CNT A 208     -71.675  47.160 -53.770  9.00  0.00           C  
ATOM   2874  C   CNT A 208     -71.197  46.807 -52.540  7.00  0.00           C  
ATOM   2875  C   CNT A 208     -72.165  46.247 -51.680  5.00  0.00           C  
ATOM   2876  C   CNT A 208     -71.805  46.105 -50.350  4.00  0.00           C  
ATOM   2877  C   CNT A 208     -69.913  47.173 -52.000  5.00  0.00           C  
ATOM   2878  C   CNT A 208     -69.651  47.344 -50.650  6.00  0.00           C  
ATOM   2879  C   CNT A 208     -70.680  46.760 -49.830  6.00  0.00           C  
ATOM   2880  C   CNT A 208     -70.551  46.938 -48.430  5.00  0.00           C  
ATOM   2881  C   CNT A 208     -68.605  47.967 -49.950  0.00  0.00           C  
ATOM   2882  C   CNT A 208     -68.639  48.385 -48.620  4.00  0.00           C  
ATOM   2883  C   CNT A 208     -69.690  47.925 -47.870  7.00  0.00           C  
ATOM   2884  C   CNT A 208     -69.873  48.354 -46.610  1.00  0.00           C  
ATOM   2885  C   CNT A 208     -67.724  49.278 -47.950  8.00  0.00           C  
ATOM   2886  C   CNT A 208     -68.213  50.073 -46.850  1.00  0.00           C  
ATOM   2887  C   CNT A 208     -69.278  49.523 -46.150  7.00  0.00           C  
ATOM   2888  C   CNT A 208     -69.779  50.162 -44.940  4.00  0.00           C  
ATOM   2889  C   CNT A 208     -67.884  51.397 -46.530  4.00  0.00           C  
ATOM   2890  C   CNT A 208     -68.539  52.183 -45.580  4.00  0.00           C  
ATOM   2891  C   CNT A 208     -69.534  51.542 -44.800  6.00  0.00           C  
ATOM   2892  C   CNT A 208     -70.441  52.243 -44.000  9.00  0.00           C  
ATOM   2893  C   CNT A 208     -68.450  53.555 -45.410  2.00  0.00           C  
ATOM   2894  C   CNT A 208     -69.501  54.292 -44.820  8.00  0.00           C  
ATOM   2895  C   CNT A 208     -70.488  53.670 -44.080  8.00  0.00           C  
ATOM   2896  C   CNT A 208     -71.452  54.385 -43.480  9.00  0.00           C  
ATOM   2897  C   CNT A 208     -69.712  55.664 -45.010  4.00  0.00           C  
ATOM   2898  C   CNT A 208     -70.795  56.429 -44.640  3.00  0.00           C  
ATOM   2899  C   CNT A 208     -71.665  55.774 -43.740  0.00  0.00           C  
ATOM   2900  C   CNT A 208     -72.933  56.358 -43.440  8.00  0.00           C  
ATOM   2901  C   CNT A 208     -71.172  57.716 -45.060  1.00  0.00           C  
ATOM   2902  C   CNT A 208     -72.469  58.240 -44.940  2.00  0.00           C  
ATOM   2903  C   CNT A 208     -73.399  57.495 -44.170  3.00  0.00           C  
ATOM   2904  C   CNT A 208     -74.796  57.710 -44.210  0.00  0.00           C  
ATOM   2905  C   CNT A 208     -73.060  59.353 -45.520  7.00  0.00           C  
ATOM   2906  C   CNT A 208     -74.430  59.480 -45.880  7.00  0.00           C  
ATOM   2907  C   CNT A 208     -75.253  58.638 -45.150  6.00  0.00           C  
ATOM   2908  C   CNT A 208     -76.691  58.646 -45.480  5.00  0.00           C  
ATOM   2909  C   CNT A 208     -74.961  60.036 -47.110  0.00  0.00           C  
ATOM   2910  C   CNT A 208     -76.319  59.930 -47.480  4.00  0.00           C  
ATOM   2911  C   CNT A 208     -77.180  59.193 -46.660  6.00  0.00           C  
ATOM   2912  C   CNT A 208     -78.519  58.977 -47.100  9.00  0.00           C  
ATOM   2913  C   CNT A 208     -76.954  60.503 -48.570  4.00  0.00           C  
ATOM   2914  C   CNT A 208     -78.092  60.079 -49.220  4.00  0.00           C  
ATOM   2915  C   CNT A 208     -78.995  59.349 -48.360  6.00  0.00           C  
ATOM   2916  C   CNT A 208     -80.135  58.742 -48.850  7.00  0.00           C  
ATOM   2917  C   CNT A 208     -78.651  60.262 -50.430  4.00  0.00           C  
ATOM   2918  C   CNT A 208     -79.647  59.489 -51.100  0.00  0.00           C  
ATOM   2919  C   CNT A 208     -80.431  58.654 -50.250  3.00  0.00           C  
ATOM   2920  C   CNT A 208     -81.486  57.965 -50.790  3.00  0.00           C  
ATOM   2921  C   CNT A 208     -79.892  59.363 -52.460  7.00  0.00           C  
ATOM   2922  C   CNT A 208     -80.707  58.393 -53.060  2.00  0.00           C  
ATOM   2923  C   CNT A 208     -81.448  57.592 -52.150  4.00  0.00           C  
ATOM   2924  C   CNT A 208     -82.110  56.391 -52.620  4.00  0.00           C  
ATOM   2925  C   CNT A 208     -80.724  57.941 -54.370  1.00  0.00           C  
ATOM   2926  C   CNT A 208     -81.017  56.629 -54.800  1.00  0.00           C  
ATOM   2927  C   CNT A 208     -81.743  55.800 -53.870  4.00  0.00           C  
ATOM   2928  C   CNT A 208     -82.031  54.486 -54.140  4.00  0.00           C  
ATOM   2929  C   CNT A 208     -80.648  55.886 -55.940  7.00  0.00           C  
ATOM   2930  C   CNT A 208     -80.639  54.495 -56.080  9.00  0.00           C  
ATOM   2931  C   CNT A 208     -81.431  53.763 -55.170  9.00  0.00           C  
ATOM   2932  C   CNT A 208     -81.464  52.362 -55.200  7.00  0.00           C  
ATOM   2933  C   CNT A 208     -79.856  53.770 -57.010  6.00  0.00           C  
ATOM   2934  C   CNT A 208     -79.837  52.397 -57.070  7.00  0.00           C  
ATOM   2935  C   CNT A 208     -80.653  51.681 -56.130  6.00  0.00           C  
ATOM   2936  C   CNT A 208     -80.445  50.315 -55.920  0.00  0.00           C  
ATOM   2937  C   CNT A 208     -79.040  51.558 -57.900  3.00  0.00           C  
ATOM   2938  C   CNT A 208     -78.561  50.307 -57.480  4.00  0.00           C  
ATOM   2939  C   CNT A 208     -79.342  49.661 -56.450  1.00  0.00           C  
ATOM   2940  C   CNT A 208     -78.887  48.498 -55.820  2.00  0.00           C  
ATOM   2941  C   CNT A 208     -79.790  47.739 -55.020  7.00  0.00           C  
ATOM   2942  C   CNT A 208     -79.357  46.660 -54.270  6.00  0.00           C  
ATOM   2943  C   CNT A 208     -80.207  45.891 -53.430  0.00  0.00           C  
ATOM   2944  C   CNT A 208     -79.785  44.851 -52.630  4.00  0.00           C  
ATOM   2945  C   CNT A 208     -77.947  46.401 -54.250  0.00  0.00           C  
ATOM   2946  C   CNT A 208     -77.439  45.482 -53.330  4.00  0.00           C  
ATOM   2947  C   CNT A 208     -78.358  44.715 -52.550  0.00  0.00           C  
ATOM   2948  C   CNT A 208     -77.845  44.124 -51.350  4.00  0.00           C  
ATOM   2949  C   CNT A 208     -76.053  45.433 -53.000  1.00  0.00           C  
ATOM   2950  C   CNT A 208     -75.599  44.919 -51.800  7.00  0.00           C  
ATOM   2951  C   CNT A 208     -76.502  44.266 -50.950  2.00  0.00           C  
ATOM   2952  C   CNT A 208     -76.059  43.802 -49.660  6.00  0.00           C  
ATOM   2953  C   CNT A 208     -74.331  45.295 -51.370  0.00  0.00           C  
ATOM   2954  C   CNT A 208     -73.981  45.083 -50.070  1.00  0.00           C  
ATOM   2955  C   CNT A 208     -74.778  44.203 -49.260  5.00  0.00           C  
ATOM   2956  C   CNT A 208     -74.519  44.130 -47.900  9.00  0.00           C  
ATOM   2957  C   CNT A 208     -72.766  45.543 -49.540  9.00  0.00           C  
ATOM   2958  C   CNT A 208     -72.540  45.525 -48.180  3.00  0.00           C  
ATOM   2959  C   CNT A 208     -73.338  44.716 -47.330  9.00  0.00           C  
ATOM   2960  C   CNT A 208     -73.202  44.867 -45.940  8.00  0.00           C  
ATOM   2961  C   CNT A 208     -71.453  46.322 -47.580  3.00  0.00           C  
ATOM   2962  C   CNT A 208     -71.417  46.562 -46.240  0.00  0.00           C  
ATOM   2963  C   CNT A 208     -72.287  45.787 -45.380  4.00  0.00           C  
ATOM   2964  C   CNT A 208     -72.519  46.286 -44.090  9.00  0.00           C  
ATOM   2965  C   CNT A 208     -70.676  47.616 -45.730  4.00  0.00           C  
ATOM   2966  C   CNT A 208     -71.032  48.167 -44.520  2.00  0.00           C  
ATOM   2967  C   CNT A 208     -72.034  47.537 -43.740  2.00  0.00           C  
ATOM   2968  C   CNT A 208     -72.513  48.125 -42.580  2.00  0.00           C  
ATOM   2969  C   CNT A 208     -70.779  49.506 -44.200  0.00  0.00           C  
ATOM   2970  C   CNT A 208     -71.412  50.192 -43.180  5.00  0.00           C  
ATOM   2971  C   CNT A 208     -72.359  49.538 -42.420  7.00  0.00           C  
ATOM   2972  C   CNT A 208     -73.079  50.252 -41.450  7.00  0.00           C  
ATOM   2973  C   CNT A 208     -71.241  51.634 -43.060  9.00  0.00           C  
ATOM   2974  C   CNT A 208     -72.167  52.376 -42.290  2.00  0.00           C  
ATOM   2975  C   CNT A 208     -73.134  51.649 -41.510  6.00  0.00           C  
ATOM   2976  C   CNT A 208     -74.143  52.382 -40.830  6.00  0.00           C  
ATOM   2977  C   CNT A 208     -72.351  53.736 -42.600  6.00  0.00           C  
ATOM   2978  C   CNT A 208     -73.441  54.410 -42.040  5.00  0.00           C  
ATOM   2979  C   CNT A 208     -74.367  53.676 -41.280  6.00  0.00           C  
ATOM   2980  C   CNT A 208     -75.675  54.254 -41.050  2.00  0.00           C  
ATOM   2981  C   CNT A 208     -73.839  55.657 -42.530  4.00  0.00           C  
ATOM   2982  C   CNT A 208     -75.219  55.989 -42.610  4.00  0.00           C  
ATOM   2983  C   CNT A 208     -76.083  55.373 -41.740  1.00  0.00           C  
ATOM   2984  C   CNT A 208     -77.413  55.689 -41.750  6.00  0.00           C  
ATOM   2985  C   CNT A 208     -75.671  57.031 -43.460  9.00  0.00           C  
ATOM   2986  C   CNT A 208     -77.067  57.226 -43.620  9.00  0.00           C  
ATOM   2987  C   CNT A 208     -77.963  56.591 -42.660  0.00  0.00           C  
ATOM   2988  C   CNT A 208     -79.355  56.631 -42.870  4.00  0.00           C  
ATOM   2989  C   CNT A 208     -77.618  57.998 -44.650  5.00  0.00           C  
ATOM   2990  C   CNT A 208     -78.962  57.804 -45.030  6.00  0.00           C  
ATOM   2991  C   CNT A 208     -79.881  57.240 -44.060  3.00  0.00           C  
ATOM   2992  C   CNT A 208     -81.210  56.976 -44.480  7.00  0.00           C  
ATOM   2993  C   CNT A 208     -79.375  58.199 -46.300  0.00  0.00           C  
ATOM   2994  C   CNT A 208     -80.660  57.821 -46.680  6.00  0.00           C  
ATOM   2995  C   CNT A 208     -81.515  57.165 -45.800  7.00  0.00           C  
ATOM   2996  C   CNT A 208     -82.734  56.650 -46.280  9.00  0.00           C  
ATOM   2997  C   CNT A 208     -81.029  58.007 -48.020  8.00  0.00           C  
ATOM   2998  C   CNT A 208     -82.189  57.427 -48.530  7.00  0.00           C  
ATOM   2999  C   CNT A 208     -82.883  56.572 -47.700  3.00  0.00           C  
ATOM   3000  C   CNT A 208     -83.935  55.779 -48.190  4.00  0.00           C  
ATOM   3001  C   CNT A 208     -82.335  57.245 -49.930  2.00  0.00           C  
ATOM   3002  C   CNT A 208     -83.099  56.147 -50.450  2.00  0.00           C  
ATOM   3003  C   CNT A 208     -83.903  55.397 -49.570  3.00  0.00           C  
ATOM   3004  C   CNT A 208     -84.557  54.248 -50.040  1.00  0.00           C  
ATOM   3005  C   CNT A 208     -82.946  55.691 -51.720  9.00  0.00           C  
ATOM   3006  C   CNT A 208     -83.422  54.459 -52.200  4.00  0.00           C  
ATOM   3007  C   CNT A 208     -84.280  53.758 -51.270  8.00  0.00           C  
ATOM   3008  C   CNT A 208     -84.601  52.401 -51.530  3.00  0.00           C  
ATOM   3009  C   CNT A 208     -82.890  53.798 -53.270  8.00  0.00           C  
ATOM   3010  C   CNT A 208     -83.212  52.412 -53.520  5.00  0.00           C  
ATOM   3011  C   CNT A 208     -83.965  51.671 -52.570  0.00  0.00           C  
ATOM   3012  C   CNT A 208     -83.995  50.281 -52.590  4.00  0.00           C  
ATOM   3013  C   CNT A 208     -82.333  51.691 -54.380  1.00  0.00           C  
ATOM   3014  C   CNT A 208     -82.272  50.304 -54.430  0.00  0.00           C  
ATOM   3015  C   CNT A 208     -83.022  49.656 -53.420  3.00  0.00           C  
ATOM   3016  C   CNT A 208     -83.008  48.221 -53.380  1.00  0.00           C  
ATOM   3017  C   CNT A 208     -81.256  49.605 -55.060  8.00  0.00           C  
ATOM   3018  C   CNT A 208     -81.031  48.297 -54.760  9.00  0.00           C  
ATOM   3019  C   CNT A 208     -81.868  47.594 -53.860  3.00  0.00           C  
ATOM   3020  C   CNT A 208     -81.513  46.401 -53.280  8.00  0.00           C  
ATOM   3021  C   CNT A 208     -82.385  45.623 -52.490  9.00  0.00           C  
ATOM   3022  C   CNT A 208     -81.941  44.574 -51.680  0.00  0.00           C  
ATOM   3023  C   CNT A 208     -82.855  43.853 -50.870  9.00  0.00           C  
ATOM   3024  C   CNT A 208     -82.349  42.777 -50.010  8.00  0.00           C  
ATOM   3025  C   CNT A 208     -80.595  44.194 -51.690  3.00  0.00           C  
ATOM   3026  C   CNT A 208     -80.057  43.405 -50.660  6.00  0.00           C  
ATOM   3027  C   CNT A 208     -80.895  42.645 -49.900  1.00  0.00           C  
ATOM   3028  C   CNT A 208     -80.409  41.812 -48.860  4.00  0.00           C  
ATOM   3029  C   CNT A 208     -78.672  43.374 -50.520  0.00  0.00           C  
ATOM   3030  C   CNT A 208     -78.201  42.784 -49.310  7.00  0.00           C  
ATOM   3031  C   CNT A 208     -79.071  41.991 -48.520  2.00  0.00           C  
ATOM   3032  C   CNT A 208     -78.618  41.700 -47.180  7.00  0.00           C  
ATOM   3033  C   CNT A 208     -76.847  43.040 -48.810  5.00  0.00           C  
ATOM   3034  C   CNT A 208     -76.516  42.843 -47.500  5.00  0.00           C  
ATOM   3035  C   CNT A 208     -77.375  42.174 -46.670  6.00  0.00           C  
ATOM   3036  C   CNT A 208     -77.082  42.063 -45.330  5.00  0.00           C  
ATOM   3037  C   CNT A 208     -75.311  43.387 -47.060  5.00  0.00           C  
ATOM   3038  C   CNT A 208     -75.105  43.442 -45.670  1.00  0.00           C  
ATOM   3039  C   CNT A 208     -75.999  42.741 -44.820  4.00  0.00           C  
ATOM   3040  C   CNT A 208     -75.855  42.852 -43.430  1.00  0.00           C  
ATOM   3041  C   CNT A 208     -74.056  44.183 -45.070  6.00  0.00           C  
ATOM   3042  C   CNT A 208     -74.141  44.483 -43.750  3.00  0.00           C  
ATOM   3043  C   CNT A 208     -75.061  43.869 -42.890  0.00  0.00           C  
ATOM   3044  C   CNT A 208     -75.245  44.263 -41.570  1.00  0.00           C  
ATOM   3045  C   CNT A 208     -73.379  45.554 -43.240  4.00  0.00           C  
ATOM   3046  C   CNT A 208     -73.814  46.155 -42.100  5.00  0.00           C  
ATOM   3047  C   CNT A 208     -74.737  45.531 -41.240  6.00  0.00           C  
ATOM   3048  C   CNT A 208     -75.253  46.127 -40.090  9.00  0.00           C  
ATOM   3049  C   CNT A 208     -73.422  47.492 -41.770  1.00  0.00           C  
ATOM   3050  C   CNT A 208     -74.093  48.148 -40.740  2.00  0.00           C  
ATOM   3051  C   CNT A 208     -75.044  47.527 -39.940  6.00  0.00           C  
ATOM   3052  C   CNT A 208     -75.731  48.210 -38.970  9.00  0.00           C  
ATOM   3053  C   CNT A 208     -73.984  49.555 -40.630  9.00  0.00           C  
ATOM   3054  C   CNT A 208     -74.974  50.306 -39.900  5.00  0.00           C  
ATOM   3055  C   CNT A 208     -75.862  49.598 -39.100  6.00  0.00           C  
ATOM   3056  C   CNT A 208     -76.866  50.313 -38.410  8.00  0.00           C  
ATOM   3057  C   CNT A 208     -75.120  51.650 -40.190  8.00  0.00           C  
ATOM   3058  C   CNT A 208     -76.291  52.271 -39.770  3.00  0.00           C  
ATOM   3059  C   CNT A 208     -77.107  51.625 -38.850  8.00  0.00           C  
ATOM   3060  C   CNT A 208     -78.327  52.185 -38.460  5.00  0.00           C  
ATOM   3061  C   CNT A 208     -76.584  53.518 -40.240  3.00  0.00           C  
ATOM   3062  C   CNT A 208     -77.812  54.158 -39.870  1.00  0.00           C  
ATOM   3063  C   CNT A 208     -78.695  53.369 -39.160  4.00  0.00           C  
ATOM   3064  C   CNT A 208     -80.113  53.679 -39.130  8.00  0.00           C  
ATOM   3065  C   CNT A 208     -78.303  55.185 -40.760  9.00  0.00           C  
ATOM   3066  C   CNT A 208     -79.699  55.259 -40.910  8.00  0.00           C  
ATOM   3067  C   CNT A 208     -80.582  54.498 -40.150  4.00  0.00           C  
ATOM   3068  C   CNT A 208     -82.003  54.578 -40.290  2.00  0.00           C  
ATOM   3069  C   CNT A 208     -80.227  56.034 -41.950  6.00  0.00           C  
ATOM   3070  C   CNT A 208     -81.579  55.859 -42.270  7.00  0.00           C  
ATOM   3071  C   CNT A 208     -82.478  55.178 -41.410  9.00  0.00           C  
ATOM   3072  C   CNT A 208     -83.823  54.940 -41.860  6.00  0.00           C  
ATOM   3073  C   CNT A 208     -82.027  56.271 -43.560  6.00  0.00           C  
ATOM   3074  C   CNT A 208     -83.287  55.854 -44.030  9.00  0.00           C  
ATOM   3075  C   CNT A 208     -84.199  55.236 -43.190  1.00  0.00           C  
ATOM   3076  C   CNT A 208     -85.381  54.630 -43.710  0.00  0.00           C  
ATOM   3077  C   CNT A 208     -83.598  56.013 -45.370  9.00  0.00           C  
ATOM   3078  C   CNT A 208     -84.654  55.240 -45.940  8.00  0.00           C  
ATOM   3079  C   CNT A 208     -85.596  54.549 -45.090  9.00  0.00           C  
ATOM   3080  C   CNT A 208     -86.581  53.719 -45.660  1.00  0.00           C  
ATOM   3081  C   CNT A 208     -84.738  55.074 -47.360  1.00  0.00           C  
ATOM   3082  C   CNT A 208     -85.584  54.077 -47.850  0.00  0.00           C  
ATOM   3083  C   CNT A 208     -86.476  53.380 -47.020  6.00  0.00           C  
ATOM   3084  C   CNT A 208     -87.167  52.253 -47.440  0.00  0.00           C  
ATOM   3085  C   CNT A 208     -85.380  53.511 -49.150  0.00  0.00           C  
ATOM   3086  C   CNT A 208     -85.989  52.322 -49.520  8.00  0.00           C  
ATOM   3087  C   CNT A 208     -86.873  51.629 -48.650  6.00  0.00           C  
ATOM   3088  C   CNT A 208     -87.230  50.361 -48.980  3.00  0.00           C  
ATOM   3089  C   CNT A 208     -85.484  51.694 -50.690  2.00  0.00           C  
ATOM   3090  C   CNT A 208     -85.626  50.290 -50.880  8.00  0.00           C  
ATOM   3091  C   CNT A 208     -86.558  49.673 -50.040  1.00  0.00           C  
ATOM   3092  C   CNT A 208     -86.630  48.229 -50.150  9.00  0.00           C  
ATOM   3093  C   CNT A 208     -84.896  49.582 -51.810  7.00  0.00           C  
ATOM   3094  C   CNT A 208     -84.908  48.207 -51.930  3.00  0.00           C  
ATOM   3095  C   CNT A 208     -85.816  47.558 -51.100  5.00  0.00           C  
ATOM   3096  C   CNT A 208     -85.666  46.164 -50.870  3.00  0.00           C  
ATOM   3097  C   CNT A 208     -83.894  47.468 -52.590  6.00  0.00           C  
ATOM   3098  C   CNT A 208     -83.656  46.155 -52.170  4.00  0.00           C  
ATOM   3099  C   CNT A 208     -84.517  45.519 -51.350  0.00  0.00           C  
ATOM   3100  C   CNT A 208     -84.173  44.272 -50.810  9.00  0.00           C  
ATOM   3101  C   CNT A 208     -85.035  43.525 -50.000  0.00  0.00           C  
ATOM   3102  C   CNT A 208     -84.623  42.380 -49.250  8.00  0.00           C  
ATOM   3103  C   CNT A 208     -85.425  41.758 -48.340  2.00  0.00           C  
ATOM   3104  C   CNT A 208     -84.947  40.797 -47.500  6.00  0.00           C  
ATOM   3105  C   CNT A 208     -83.233  42.046 -49.280  5.00  0.00           C  
ATOM   3106  C   CNT A 208     -82.673  41.202 -48.310  4.00  0.00           C  
ATOM   3107  C   CNT A 208     -83.526  40.552 -47.460  5.00  0.00           C  
ATOM   3108  C   CNT A 208     -83.035  39.825 -46.360  3.00  0.00           C  
ATOM   3109  C   CNT A 208     -81.295  41.155 -48.040  2.00  0.00           C  
ATOM   3110  C   CNT A 208     -80.817  40.624 -46.850  5.00  0.00           C  
ATOM   3111  C   CNT A 208     -81.700  39.896 -46.040  7.00  0.00           C  
ATOM   3112  C   CNT A 208     -81.297  39.596 -44.770  5.00  0.00           C  
ATOM   3113  C   CNT A 208     -79.495  40.945 -46.370  3.00  0.00           C  
ATOM   3114  C   CNT A 208     -79.111  40.685 -45.070  0.00  0.00           C  
ATOM   3115  C   CNT A 208     -80.054  40.074 -44.220  7.00  0.00           C  
ATOM   3116  C   CNT A 208     -79.800  40.120 -42.840  7.00  0.00           C  
ATOM   3117  C   CNT A 208     -77.972  41.356 -44.560  9.00  0.00           C  
ATOM   3118  C   CNT A 208     -77.890  41.455 -43.140  1.00  0.00           C  
ATOM   3119  C   CNT A 208     -78.719  40.793 -42.280  6.00  0.00           C  
ATOM   3120  C   CNT A 208     -78.582  40.878 -40.910  5.00  0.00           C  
ATOM   3121  C   CNT A 208     -76.822  42.227 -42.630  2.00  0.00           C  
ATOM   3122  C   CNT A 208     -76.831  42.489 -41.250  6.00  0.00           C  
ATOM   3123  C   CNT A 208     -77.642  41.775 -40.330  1.00  0.00           C  
ATOM   3124  C   CNT A 208     -77.766  42.182 -39.020  0.00  0.00           C  
ATOM   3125  C   CNT A 208     -76.147  43.580 -40.730  9.00  0.00           C  
ATOM   3126  C   CNT A 208     -76.447  44.129 -39.490  6.00  0.00           C  
ATOM   3127  C   CNT A 208     -77.154  43.401 -38.580  5.00  0.00           C  
ATOM   3128  C   CNT A 208     -77.635  44.078 -37.440  0.00  0.00           C  
ATOM   3129  C   CNT A 208     -76.098  45.473 -39.230  5.00  0.00           C  
ATOM   3130  C   CNT A 208     -76.640  46.132 -38.140  9.00  0.00           C  
ATOM   3131  C   CNT A 208     -77.529  45.456 -37.330  3.00  0.00           C  
ATOM   3132  C   CNT A 208     -78.373  46.170 -36.470  7.00  0.00           C  
ATOM   3133  C   CNT A 208     -76.557  47.516 -38.080  3.00  0.00           C  
ATOM   3134  C   CNT A 208     -77.532  48.224 -37.320  6.00  0.00           C  
ATOM   3135  C   CNT A 208     -78.473  47.573 -36.580  5.00  0.00           C  
ATOM   3136  C   CNT A 208     -79.452  48.263 -35.830  3.00  0.00           C  
ATOM   3137  C   CNT A 208     -77.655  49.608 -37.510  4.00  0.00           C  
ATOM   3138  C   CNT A 208     -78.822  50.248 -37.060  0.00  0.00           C  
ATOM   3139  C   CNT A 208     -79.723  49.603 -36.200  1.00  0.00           C  
ATOM   3140  C   CNT A 208     -80.925  50.177 -35.860  5.00  0.00           C  
ATOM   3141  C   CNT A 208     -79.198  51.504 -37.620  6.00  0.00           C  
ATOM   3142  C   CNT A 208     -80.506  51.936 -37.500  4.00  0.00           C  
ATOM   3143  C   CNT A 208     -81.398  51.276 -36.610  4.00  0.00           C  
ATOM   3144  C   CNT A 208     -82.716  51.622 -36.570  4.00  0.00           C  
ATOM   3145  C   CNT A 208     -80.986  52.978 -38.270  9.00  0.00           C  
ATOM   3146  C   CNT A 208     -82.345  53.193 -38.410  6.00  0.00           C  
ATOM   3147  C   CNT A 208     -83.224  52.593 -37.470  6.00  0.00           C  
ATOM   3148  C   CNT A 208     -84.584  52.609 -37.730  3.00  0.00           C  
ATOM   3149  C   CNT A 208     -82.846  53.817 -39.520  5.00  0.00           C  
ATOM   3150  C   CNT A 208     -84.220  53.839 -39.760  5.00  0.00           C  
ATOM   3151  C   CNT A 208     -85.109  53.129 -38.920  7.00  0.00           C  
ATOM   3152  C   CNT A 208     -86.455  53.052 -39.290  1.00  0.00           C  
ATOM   3153  C   CNT A 208     -84.627  54.149 -41.050  6.00  0.00           C  
ATOM   3154  C   CNT A 208     -85.990  53.890 -41.480  0.00  0.00           C  
ATOM   3155  C   CNT A 208     -86.883  53.258 -40.610  7.00  0.00           C  
ATOM   3156  C   CNT A 208     -88.042  52.716 -41.120  5.00  0.00           C  
ATOM   3157  C   CNT A 208     -86.319  54.069 -42.840  1.00  0.00           C  
ATOM   3158  C   CNT A 208     -87.373  53.391 -43.400  8.00  0.00           C  
ATOM   3159  C   CNT A 208     -88.229  52.645 -42.500  6.00  0.00           C  
ATOM   3160  C   CNT A 208     -89.121  51.694 -43.060  4.00  0.00           C  
ATOM   3161  C   CNT A 208     -87.548  53.166 -44.800  9.00  0.00           C  
ATOM   3162  C   CNT A 208     -88.298  52.085 -45.290  3.00  0.00           C  
ATOM   3163  C   CNT A 208     -89.097  51.391 -44.410  9.00  0.00           C  
ATOM   3164  C   CNT A 208     -89.627  50.186 -44.800  9.00  0.00           C  
ATOM   3165  C   CNT A 208     -88.110  51.580 -46.590  0.00  0.00           C  
ATOM   3166  C   CNT A 208     -88.480  50.288 -46.960  3.00  0.00           C  
ATOM   3167  C   CNT A 208     -89.298  49.571 -46.030  2.00  0.00           C  
ATOM   3168  C   CNT A 208     -89.628  48.232 -46.360  6.00  0.00           C  
ATOM   3169  C   CNT A 208     -88.004  49.603 -48.060  4.00  0.00           C  
ATOM   3170  C   CNT A 208     -88.243  48.260 -48.350  7.00  0.00           C  
ATOM   3171  C   CNT A 208     -89.051  47.525 -47.450  6.00  0.00           C  
ATOM   3172  C   CNT A 208     -89.159  46.176 -47.530  1.00  0.00           C  
ATOM   3173  C   CNT A 208     -87.502  47.540 -49.290  7.00  0.00           C  
ATOM   3174  C   CNT A 208     -87.456  46.163 -49.220  1.00  0.00           C  
ATOM   3175  C   CNT A 208     -88.308  45.461 -48.310  2.00  0.00           C  
ATOM   3176  C   CNT A 208     -88.157  44.062 -48.160  1.00  0.00           C  
ATOM   3177  C   CNT A 208     -86.564  45.434 -50.040  5.00  0.00           C  
ATOM   3178  C   CNT A 208     -86.292  44.064 -49.690  4.00  0.00           C  
ATOM   3179  C   CNT A 208     -87.174  43.371 -48.820  6.00  0.00           C  
ATOM   3180  C   CNT A 208     -86.784  42.156 -48.250  8.00  0.00           C  
ATOM   3181  C   CNT A 208     -87.643  41.540 -47.300  6.00  0.00           C  
ATOM   3182  C   CNT A 208     -87.204  40.398 -46.610  3.00  0.00           C  
ATOM   3183  C   CNT A 208     -88.046  39.638 -45.850  8.00  0.00           C  
ATOM   3184  C   CNT A 208     -87.530  38.588 -45.050  6.00  0.00           C  
ATOM   3185  C   CNT A 208     -85.823  40.004 -46.730  6.00  0.00           C  
ATOM   3186  C   CNT A 208     -85.354  39.043 -45.820  7.00  0.00           C  
ATOM   3187  C   CNT A 208     -86.187  38.399 -44.930  2.00  0.00           C  
ATOM   3188  C   CNT A 208     -85.681  37.778 -43.820  3.00  0.00           C  
ATOM   3189  C   CNT A 208     -83.961  39.138 -45.540  6.00  0.00           C  
ATOM   3190  C   CNT A 208     -83.524  38.754 -44.260  7.00  0.00           C  
ATOM   3191  C   CNT A 208     -84.399  38.083 -43.390  2.00  0.00           C  
ATOM   3192  C   CNT A 208     -83.925  37.679 -42.100  7.00  0.00           C  
ATOM   3193  C   CNT A 208     -82.197  39.088 -43.800  4.00  0.00           C  
ATOM   3194  C   CNT A 208     -81.881  38.937 -42.480  4.00  0.00           C  
ATOM   3195  C   CNT A 208     -82.746  38.265 -41.620  4.00  0.00           C  
ATOM   3196  C   CNT A 208     -82.461  38.211 -40.270  0.00  0.00           C  
ATOM   3197  C   CNT A 208     -80.685  39.448 -42.010  6.00  0.00           C  
ATOM   3198  C   CNT A 208     -80.444  39.425 -40.600  9.00  0.00           C  
ATOM   3199  C   CNT A 208     -81.350  38.765 -39.720  3.00  0.00           C  
ATOM   3200  C   CNT A 208     -81.247  38.925 -38.310  9.00  0.00           C  
ATOM   3201  C   CNT A 208     -79.413  40.187 -40.040  0.00  0.00           C  
ATOM   3202  C   CNT A 208     -79.345  40.367 -38.660  0.00  0.00           C  
ATOM   3203  C   CNT A 208     -80.330  39.861 -37.820  9.00  0.00           C  
ATOM   3204  C   CNT A 208     -80.370  40.162 -36.430  3.00  0.00           C  
ATOM   3205  C   CNT A 208     -78.654  41.472 -38.160  4.00  0.00           C  
ATOM   3206  C   CNT A 208     -79.001  42.127 -36.910  4.00  0.00           C  
ATOM   3207  C   CNT A 208     -79.842  41.398 -36.050  1.00  0.00           C  
ATOM   3208  C   CNT A 208     -80.378  42.069 -34.930  6.00  0.00           C  
ATOM   3209  C   CNT A 208     -78.543  43.400 -36.640  3.00  0.00           C  
ATOM   3210  C   CNT A 208     -79.202  44.093 -35.560  2.00  0.00           C  
ATOM   3211  C   CNT A 208     -80.066  43.416 -34.670  9.00  0.00           C  
ATOM   3212  C   CNT A 208     -80.941  44.127 -33.840  9.00  0.00           C  
ATOM   3213  C   CNT A 208     -79.240  45.484 -35.570  9.00  0.00           C  
ATOM   3214  C   CNT A 208     -80.235  46.195 -34.850  6.00  0.00           C  
ATOM   3215  C   CNT A 208     -81.067  45.527 -34.000  5.00  0.00           C  
ATOM   3216  C   CNT A 208     -82.045  46.202 -33.270  0.00  0.00           C  
ATOM   3217  C   CNT A 208     -80.308  47.594 -35.000  8.00  0.00           C  
ATOM   3218  C   CNT A 208     -81.437  48.196 -34.500  3.00  0.00           C  
ATOM   3219  C   CNT A 208     -82.360  47.515 -33.680  1.00  0.00           C  
ATOM   3220  C   CNT A 208     -83.604  48.084 -33.410  0.00  0.00           C  
ATOM   3221  C   CNT A 208     -81.815  49.472 -35.000  0.00  0.00           C  
ATOM   3222  C   CNT A 208     -83.130  49.926 -34.890  9.00  0.00           C  
ATOM   3223  C   CNT A 208     -84.021  49.196 -34.090  7.00  0.00           C  
ATOM   3224  C   CNT A 208     -85.365  49.580 -34.010  1.00  0.00           C  
ATOM   3225  C   CNT A 208     -83.665  50.929 -35.680  6.00  0.00           C  
ATOM   3226  C   CNT A 208     -84.994  51.223 -35.810  1.00  0.00           C  
ATOM   3227  C   CNT A 208     -85.889  50.458 -35.000  5.00  0.00           C  
ATOM   3228  C   CNT A 208     -87.283  50.510 -35.300  8.00  0.00           C  
ATOM   3229  C   CNT A 208     -85.526  51.877 -36.960  5.00  0.00           C  
ATOM   3230  C   CNT A 208     -86.858  51.711 -37.330  3.00  0.00           C  
ATOM   3231  C   CNT A 208     -87.735  51.055 -36.480  1.00  0.00           C  
ATOM   3232  C   CNT A 208     -89.094  50.938 -36.770  8.00  0.00           C  
ATOM   3233  C   CNT A 208     -87.307  52.254 -38.490  7.00  0.00           C  
ATOM   3234  C   CNT A 208     -88.618  51.972 -38.890  6.00  0.00           C  
ATOM   3235  C   CNT A 208     -89.512  51.290 -38.070  7.00  0.00           C  
ATOM   3236  C   CNT A 208     -90.712  50.759 -38.620  0.00  0.00           C  
ATOM   3237  C   CNT A 208     -88.879  52.023 -40.270  7.00  0.00           C  
ATOM   3238  C   CNT A 208     -89.949  51.309 -40.800  1.00  0.00           C  
ATOM   3239  C   CNT A 208     -90.894  50.657 -39.970  4.00  0.00           C  
ATOM   3240  C   CNT A 208     -91.847  49.707 -40.500  1.00  0.00           C  
ATOM   3241  C   CNT A 208     -90.006  51.010 -42.180  3.00  0.00           C  
ATOM   3242  C   CNT A 208     -90.680  49.904 -42.670  1.00  0.00           C  
ATOM   3243  C   CNT A 208     -91.621  49.277 -41.800  8.00  0.00           C  
ATOM   3244  C   CNT A 208     -92.259  48.148 -42.260  2.00  0.00           C  
ATOM   3245  C   CNT A 208     -90.596  49.504 -43.980  2.00  0.00           C  
ATOM   3246  C   CNT A 208     -91.158  48.292 -44.430  3.00  0.00           C  
ATOM   3247  C   CNT A 208     -91.951  47.523 -43.480  2.00  0.00           C  
ATOM   3248  C   CNT A 208     -92.270  46.189 -43.830  3.00  0.00           C  
ATOM   3249  C   CNT A 208     -90.553  47.588 -45.540  3.00  0.00           C  
ATOM   3250  C   CNT A 208     -90.813  46.269 -45.720  4.00  0.00           C  
ATOM   3251  C   CNT A 208     -91.742  45.558 -44.960  1.00  0.00           C  
ATOM   3252  C   CNT A 208     -91.771  44.160 -44.900  8.00  0.00           C  
ATOM   3253  C   CNT A 208     -89.992  45.595 -46.610  1.00  0.00           C  
ATOM   3254  C   CNT A 208     -89.974  44.197 -46.500  1.00  0.00           C  
ATOM   3255  C   CNT A 208     -90.861  43.484 -45.690  9.00  0.00           C  
ATOM   3256  C   CNT A 208     -90.740  42.109 -45.490  8.00  0.00           C  
ATOM   3257  C   CNT A 208     -89.080  43.407 -47.360  8.00  0.00           C  
ATOM   3258  C   CNT A 208     -88.838  42.067 -46.920  5.00  0.00           C  
ATOM   3259  C   CNT A 208     -89.590  41.450 -45.970  0.00  0.00           C  
ATOM   3260  C   CNT A 208     -89.344  40.098 -45.700  2.00  0.00           C  
ATOM   3261  C   CNT A 208     -90.287  39.375 -44.910  5.00  0.00           C  
ATOM   3262  C   CNT A 208     -89.767  38.336 -44.120  4.00  0.00           C  
ATOM   3263  C   CNT A 208     -90.605  37.749 -43.170  7.00  0.00           C  
ATOM   3264  C   CNT A 208     -90.144  36.709 -42.340  6.00  0.00           C  
ATOM   3265  C   CNT A 208     -88.405  38.042 -44.130  5.00  0.00           C  
ATOM   3266  C   CNT A 208     -87.896  37.196 -43.120  1.00  0.00           C  
ATOM   3267  C   CNT A 208     -88.759  36.467 -42.310  2.00  0.00           C  
ATOM   3268  C   CNT A 208     -88.246  35.755 -41.200  6.00  0.00           C  
ATOM   3269  C   CNT A 208     -86.542  37.163 -42.890  0.00  0.00           C  
ATOM   3270  C   CNT A 208     -86.081  36.585 -41.710  1.00  0.00           C  
ATOM   3271  C   CNT A 208     -86.905  35.927 -40.780  4.00  0.00           C  
ATOM   3272  C   CNT A 208     -86.390  35.410 -39.620  0.00  0.00           C  
ATOM   3273  C   CNT A 208     -84.761  36.925 -41.270  0.00  0.00           C  
ATOM   3274  C   CNT A 208     -84.465  36.739 -39.950  5.00  0.00           C  
ATOM   3275  C   CNT A 208     -85.249  35.956 -39.180  9.00  0.00           C  
ATOM   3276  C   CNT A 208     -84.974  35.819 -37.800  8.00  0.00           C  
ATOM   3277  C   CNT A 208     -83.360  37.471 -39.470  5.00  0.00           C  
ATOM   3278  C   CNT A 208     -83.160  37.374 -38.100  9.00  0.00           C  
ATOM   3279  C   CNT A 208     -83.991  36.657 -37.220  4.00  0.00           C  
ATOM   3280  C   CNT A 208     -83.891  36.784 -35.860  7.00  0.00           C  
ATOM   3281  C   CNT A 208     -82.088  38.181 -37.520  0.00  0.00           C  
ATOM   3282  C   CNT A 208     -82.147  38.515 -36.160  2.00  0.00           C  
ATOM   3283  C   CNT A 208     -83.108  37.836 -35.370  1.00  0.00           C  
ATOM   3284  C   CNT A 208     -83.380  38.332 -34.100  7.00  0.00           C  
ATOM   3285  C   CNT A 208     -81.314  39.516 -35.640  4.00  0.00           C  
ATOM   3286  C   CNT A 208     -81.775  40.091 -34.450  1.00  0.00           C  
ATOM   3287  C   CNT A 208     -82.799  39.525 -33.720  7.00  0.00           C  
ATOM   3288  C   CNT A 208     -83.339  40.171 -32.600  0.00  0.00           C  
ATOM   3289  C   CNT A 208     -81.352  41.424 -34.150  2.00  0.00           C  
ATOM   3290  C   CNT A 208     -82.102  42.143 -33.220  4.00  0.00           C  
ATOM   3291  C   CNT A 208     -83.063  41.489 -32.400  1.00  0.00           C  
ATOM   3292  C   CNT A 208     -83.661  42.173 -31.280  9.00  0.00           C  
ATOM   3293  C   CNT A 208     -81.840  43.502 -32.970  8.00  0.00           C  
ATOM   3294  C   CNT A 208     -82.802  44.190 -32.260  4.00  0.00           C  
ATOM   3295  C   CNT A 208     -83.545  43.551 -31.290  3.00  0.00           C  
ATOM   3296  C   CNT A 208     -84.625  44.225 -30.640  3.00  0.00           C  
ATOM   3297  C   CNT A 208     -82.917  45.556 -32.480  4.00  0.00           C  
ATOM   3298  C   CNT A 208     -84.086  46.167 -32.070  0.00  0.00           C  
ATOM   3299  C   CNT A 208     -84.961  45.517 -31.160  9.00  0.00           C  
ATOM   3300  C   CNT A 208     -86.182  46.120 -30.790  5.00  0.00           C  
ATOM   3301  C   CNT A 208     -84.518  47.352 -32.610  4.00  0.00           C  
ATOM   3302  C   CNT A 208     -85.807  47.810 -32.440  3.00  0.00           C  
ATOM   3303  C   CNT A 208     -86.655  47.179 -31.540  1.00  0.00           C  
ATOM   3304  C   CNT A 208     -88.033  47.433 -31.560  1.00  0.00           C  
ATOM   3305  C   CNT A 208     -86.271  48.808 -33.290  8.00  0.00           C  
ATOM   3306  C   CNT A 208     -87.624  49.061 -33.360  4.00  0.00           C  
ATOM   3307  C   CNT A 208     -88.521  48.375 -32.500  3.00  0.00           C  
ATOM   3308  C   CNT A 208     -89.868  48.550 -32.680  0.00  0.00           C  
ATOM   3309  C   CNT A 208     -88.135  49.852 -34.430  5.00  0.00           C  
ATOM   3310  C   CNT A 208     -89.487  49.883 -34.700  2.00  0.00           C  
ATOM   3311  C   CNT A 208     -90.383  49.133 -33.880  6.00  0.00           C  
ATOM   3312  C   CNT A 208     -91.687  48.810 -34.240  9.00  0.00           C  
ATOM   3313  C   CNT A 208     -89.955  50.243 -35.950  0.00  0.00           C  
ATOM   3314  C   CNT A 208     -91.270  49.911 -36.350  6.00  0.00           C  
ATOM   3315  C   CNT A 208     -92.172  49.233 -35.520  1.00  0.00           C  
ATOM   3316  C   CNT A 208     -93.197  48.474 -36.090  1.00  0.00           C  
ATOM   3317  C   CNT A 208     -91.567  50.074 -37.730  4.00  0.00           C  
ATOM   3318  C   CNT A 208     -92.533  49.213 -38.240  5.00  0.00           C  
ATOM   3319  C   CNT A 208     -93.467  48.539 -37.430  2.00  0.00           C  
ATOM   3320  C   CNT A 208     -94.456  47.698 -37.990  1.00  0.00           C  
ATOM   3321  C   CNT A 208     -92.697  49.008 -39.610  8.00  0.00           C  
ATOM   3322  C   CNT A 208     -93.511  47.997 -40.120  5.00  0.00           C  
ATOM   3323  C   CNT A 208     -94.421  47.335 -39.350  1.00  0.00           C  
ATOM   3324  C   CNT A 208     -94.898  46.119 -39.790  8.00  0.00           C  
ATOM   3325  C   CNT A 208     -93.114  47.447 -41.360  4.00  0.00           C  
ATOM   3326  C   CNT A 208     -93.621  46.152 -41.790  0.00  0.00           C  
ATOM   3327  C   CNT A 208     -94.529  45.478 -40.980  0.00  0.00           C  
ATOM   3328  C   CNT A 208     -94.906  44.173 -41.250  3.00  0.00           C  
ATOM   3329  C   CNT A 208     -93.165  45.560 -42.960  7.00  0.00           C  
ATOM   3330  C   CNT A 208     -93.447  44.208 -43.230  4.00  0.00           C  
ATOM   3331  C   CNT A 208     -94.323  43.507 -42.400  3.00  0.00           C  
ATOM   3332  C   CNT A 208     -94.509  42.117 -42.510  6.00  0.00           C  
ATOM   3333  C   CNT A 208     -92.704  43.471 -44.160  3.00  0.00           C  
ATOM   3334  C   CNT A 208     -92.734  42.054 -44.090  1.00  0.00           C  
ATOM   3335  C   CNT A 208     -93.631  41.384 -43.310  7.00  0.00           C  
ATOM   3336  C   CNT A 208     -93.470  39.977 -43.140  5.00  0.00           C  
ATOM   3337  C   CNT A 208     -91.676  41.400 -44.720  2.00  0.00           C  
ATOM   3338  C   CNT A 208     -91.454  40.008 -44.470  5.00  0.00           C  
ATOM   3339  C   CNT A 208     -92.333  39.385 -43.560  7.00  0.00           C  
ATOM   3340  C   CNT A 208     -91.991  38.152 -43.070  7.00  0.00           C  
ATOM   3341  C   CNT A 208     -92.822  37.450 -42.180  5.00  0.00           C  
ATOM   3342  C   CNT A 208     -92.326  36.396 -41.400  0.00  0.00           C  
ATOM   3343  C   CNT A 208     -93.220  35.736 -40.560  8.00  0.00           C  
ATOM   3344  C   CNT A 208     -92.736  34.743 -39.700  2.00  0.00           C  
ATOM   3345  C   CNT A 208     -90.979  36.076 -41.510  2.00  0.00           C  
ATOM   3346  C   CNT A 208     -90.485  35.144 -40.580  2.00  0.00           C  
ATOM   3347  C   CNT A 208     -91.387  34.486 -39.650  4.00  0.00           C  
ATOM   3348  C   CNT A 208     -90.811  33.701 -38.650  7.00  0.00           C  
ATOM   3349  C   CNT A 208     -89.101  35.121 -40.310  0.00  0.00           C  
ATOM   3350  C   CNT A 208     -88.569  34.586 -39.150  4.00  0.00           C  
ATOM   3351  C   CNT A 208     -89.433  33.804 -38.320  0.00  0.00           C  
ATOM   3352  C   CNT A 208     -88.983  33.265 -37.120  7.00  0.00           C  
ATOM   3353  C   CNT A 208     -87.279  34.866 -38.710  4.00  0.00           C  
ATOM   3354  C   CNT A 208     -86.907  34.522 -37.400  7.00  0.00           C  
ATOM   3355  C   CNT A 208     -87.715  33.685 -36.640  6.00  0.00           C  
ATOM   3356  C   CNT A 208     -87.413  33.672 -35.250  4.00  0.00           C  
ATOM   3357  C   CNT A 208     -85.758  35.139 -36.890  6.00  0.00           C  
ATOM   3358  C   CNT A 208     -85.524  35.093 -35.540  2.00  0.00           C  
ATOM   3359  C   CNT A 208     -86.350  34.359 -34.680  8.00  0.00           C  
ATOM   3360  C   CNT A 208     -86.394  34.615 -33.310  1.00  0.00           C  
ATOM   3361  C   CNT A 208     -84.701  36.082 -34.960  8.00  0.00           C  
ATOM   3362  C   CNT A 208     -84.899  36.415 -33.600  1.00  0.00           C  
ATOM   3363  C   CNT A 208     -85.685  35.731 -32.760  5.00  0.00           C  
ATOM   3364  C   CNT A 208     -86.033  36.335 -31.550  4.00  0.00           C  
ATOM   3365  C   CNT A 208     -84.287  37.638 -33.240  7.00  0.00           C  
ATOM   3366  C   CNT A 208     -84.657  38.210 -32.030  5.00  0.00           C  
ATOM   3367  C   CNT A 208     -85.450  37.516 -31.120  0.00  0.00           C  
ATOM   3368  C   CNT A 208     -85.910  38.124 -29.990  5.00  0.00           C  
ATOM   3369  C   CNT A 208     -84.248  39.498 -31.740  4.00  0.00           C  
ATOM   3370  C   CNT A 208     -84.787  40.161 -30.660  2.00  0.00           C  
ATOM   3371  C   CNT A 208     -85.527  39.431 -29.730  7.00  0.00           C  
ATOM   3372  C   CNT A 208     -86.243  40.124 -28.780  9.00  0.00           C  
ATOM   3373  C   CNT A 208     -84.646  41.528 -30.550  7.00  0.00           C  
ATOM   3374  C   CNT A 208     -85.466  42.229 -29.660  7.00  0.00           C  
ATOM   3375  C   CNT A 208     -86.274  41.525 -28.750  8.00  0.00           C  
ATOM   3376  C   CNT A 208     -87.253  42.247 -28.120  8.00  0.00           C  
ATOM   3377  C   CNT A 208     -85.530  43.629 -29.740  6.00  0.00           C  
ATOM   3378  C   CNT A 208     -86.700  44.230 -29.320  2.00  0.00           C  
ATOM   3379  C   CNT A 208     -87.560  43.532 -28.430  5.00  0.00           C  
ATOM   3380  C   CNT A 208     -88.845  44.156 -28.190  9.00  0.00           C  
ATOM   3381  C   CNT A 208     -87.026  45.489 -29.880  1.00  0.00           C  
ATOM   3382  C   CNT A 208     -88.382  45.915 -29.760  4.00  0.00           C  
ATOM   3383  C   CNT A 208     -89.265  45.241 -28.920  6.00  0.00           C  
ATOM   3384  C   CNT A 208     -90.659  45.564 -28.910  6.00  0.00           C  
ATOM   3385  C   CNT A 208     -88.904  46.778 -30.680  9.00  0.00           C  
ATOM   3386  C   CNT A 208     -90.259  47.096 -30.760  5.00  0.00           C  
ATOM   3387  C   CNT A 208     -91.140  46.522 -29.820  3.00  0.00           C  
ATOM   3388  C   CNT A 208     -92.567  46.604 -30.010  6.00  0.00           C  
ATOM   3389  C   CNT A 208     -90.737  47.864 -31.820  7.00  0.00           C  
ATOM   3390  C   CNT A 208     -92.093  47.746 -32.070  9.00  0.00           C  
ATOM   3391  C   CNT A 208     -92.994  47.134 -31.190  7.00  0.00           C  
ATOM   3392  C   CNT A 208     -94.253  46.745 -31.690  5.00  0.00           C  
ATOM   3393  C   CNT A 208     -92.438  47.988 -33.450  1.00  0.00           C  
ATOM   3394  C   CNT A 208     -93.679  47.558 -33.910  3.00  0.00           C  
ATOM   3395  C   CNT A 208     -94.646  47.044 -33.040  2.00  0.00           C  
ATOM   3396  C   CNT A 208     -95.825  46.521 -33.540  8.00  0.00           C  
ATOM   3397  C   CNT A 208     -94.060  47.807 -35.230  4.00  0.00           C  
ATOM   3398  C   CNT A 208     -95.208  47.174 -35.750  8.00  0.00           C  
ATOM   3399  C   CNT A 208     -96.048  46.473 -34.930  0.00  0.00           C  
ATOM   3400  C   CNT A 208     -96.985  45.647 -35.430  7.00  0.00           C  
ATOM   3401  C   CNT A 208     -95.180  46.886 -37.150  3.00  0.00           C  
ATOM   3402  C   CNT A 208     -96.047  45.906 -37.670  0.00  0.00           C  
ATOM   3403  C   CNT A 208     -96.839  45.211 -36.740  0.00  0.00           C  
ATOM   3404  C   CNT A 208     -97.447  44.020 -37.120  3.00  0.00           C  
ATOM   3405  C   CNT A 208     -95.749  45.381 -38.950  3.00  0.00           C  
ATOM   3406  C   CNT A 208     -96.312  44.180 -39.270  1.00  0.00           C  
ATOM   3407  C   CNT A 208     -97.212  43.513 -38.400  3.00  0.00           C  
ATOM   3408  C   CNT A 208     -97.640  42.243 -38.720  1.00  0.00           C  
ATOM   3409  C   CNT A 208     -95.828  43.483 -40.410  7.00  0.00           C  
ATOM   3410  C   CNT A 208     -96.095  42.128 -40.630  4.00  0.00           C  
ATOM   3411  C   CNT A 208     -97.032  41.521 -39.780  8.00  0.00           C  
ATOM   3412  C   CNT A 208     -97.063  40.100 -39.830  1.00  0.00           C  
ATOM   3413  C   CNT A 208     -95.337  41.443 -41.590  1.00  0.00           C  
ATOM   3414  C   CNT A 208     -95.360  40.083 -41.600  3.00  0.00           C  
ATOM   3415  C   CNT A 208     -96.141  39.425 -40.620  4.00  0.00           C  
ATOM   3416  C   CNT A 208     -95.989  38.045 -40.420  7.00  0.00           C  
ATOM   3417  C   CNT A 208     -94.343  39.359 -42.250  4.00  0.00           C  
ATOM   3418  C   CNT A 208     -94.049  38.006 -41.890  3.00  0.00           C  
ATOM   3419  C   CNT A 208     -94.959  37.351 -41.030  6.00  0.00           C  
ATOM   3420  C   CNT A 208     -94.597  36.056 -40.530  1.00  0.00           C  
ATOM   3421  C   CNT A 208     -95.417  35.481 -39.570  2.00  0.00           C  
ATOM   3422  C   CNT A 208     -95.012  34.338 -38.940  7.00  0.00           C  
ATOM   3423  C   CNT A 208     -95.858  33.591 -38.100  9.00  0.00           C  
ATOM   3424  C   CNT A 208     -95.338  32.612 -37.240  0.00  0.00           C  
ATOM   3425  C   CNT A 208     -93.633  33.983 -38.960  0.00  0.00           C  
ATOM   3426  C   CNT A 208     -93.127  33.155 -37.940  3.00  0.00           C  
ATOM   3427  C   CNT A 208     -93.975  32.366 -37.160  9.00  0.00           C  
ATOM   3428  C   CNT A 208     -93.457  31.597 -36.100  2.00  0.00           C  
ATOM   3429  C   CNT A 208     -91.717  33.013 -37.780  3.00  0.00           C  
ATOM   3430  C   CNT A 208     -91.167  32.278 -36.660  3.00  0.00           C  
ATOM   3431  C   CNT A 208     -92.087  31.686 -35.770  6.00  0.00           C  
ATOM   3432  C   CNT A 208     -91.637  31.147 -34.580  6.00  0.00           C  
ATOM   3433  C   CNT A 208     -89.811  32.494 -36.280  6.00  0.00           C  
ATOM   3434  C   CNT A 208     -89.442  32.222 -34.960  0.00  0.00           C  
ATOM   3435  C   CNT A 208     -90.358  31.570 -34.100  7.00  0.00           C  
ATOM   3436  C   CNT A 208     -90.085  31.588 -32.760  3.00  0.00           C  
ATOM   3437  C   CNT A 208     -88.323  32.967 -34.430  6.00  0.00           C  
ATOM   3438  C   CNT A 208     -88.237  33.122 -33.070  6.00  0.00           C  
ATOM   3439  C   CNT A 208     -89.129  32.483 -32.180  9.00  0.00           C  
ATOM   3440  C   CNT A 208     -89.103  32.623 -30.810  4.00  0.00           C  
ATOM   3441  C   CNT A 208     -87.336  33.985 -32.470  7.00  0.00           C  
ATOM   3442  C   CNT A 208     -87.497  34.417 -31.160  9.00  0.00           C  
ATOM   3443  C   CNT A 208     -88.474  33.795 -30.330  9.00  0.00           C  
ATOM   3444  C   CNT A 208     -88.526  34.192 -29.020  4.00  0.00           C  
ATOM   3445  C   CNT A 208     -86.926  35.673 -30.760  8.00  0.00           C  
ATOM   3446  C   CNT A 208     -87.186  36.160 -29.470  6.00  0.00           C  
ATOM   3447  C   CNT A 208     -88.055  35.449 -28.670  4.00  0.00           C  
ATOM   3448  C   CNT A 208     -88.490  36.067 -27.470  5.00  0.00           C  
ATOM   3449  C   CNT A 208     -86.778  37.471 -29.110  8.00  0.00           C  
ATOM   3450  C   CNT A 208     -87.414  38.132 -28.100  2.00  0.00           C  
ATOM   3451  C   CNT A 208     -88.192  37.432 -27.190  3.00  0.00           C  
ATOM   3452  C   CNT A 208     -88.819  38.106 -26.170  3.00  0.00           C  
ATOM   3453  C   CNT A 208     -87.223  39.516 -28.010  4.00  0.00           C  
ATOM   3454  C   CNT A 208     -88.017  40.208 -27.100  3.00  0.00           C  
ATOM   3455  C   CNT A 208     -88.883  39.511 -26.250  5.00  0.00           C  
ATOM   3456  C   CNT A 208     -89.813  40.203 -25.480  8.00  0.00           C  
ATOM   3457  C   CNT A 208     -88.168  41.570 -27.280  6.00  0.00           C  
ATOM   3458  C   CNT A 208     -89.237  42.286 -26.740  3.00  0.00           C  
ATOM   3459  C   CNT A 208     -90.086  41.582 -25.840  1.00  0.00           C  
ATOM   3460  C   CNT A 208     -91.396  42.026 -25.630  1.00  0.00           C  
ATOM   3461  C   CNT A 208     -89.672  43.542 -27.230  3.00  0.00           C  
ATOM   3462  C   CNT A 208     -91.017  43.902 -27.180  8.00  0.00           C  
ATOM   3463  C   CNT A 208     -91.857  43.209 -26.300  6.00  0.00           C  
ATOM   3464  C   CNT A 208     -93.221  43.568 -26.310  9.00  0.00           C  
ATOM   3465  C   CNT A 208     -91.487  45.003 -27.950  4.00  0.00           C  
ATOM   3466  C   CNT A 208     -92.890  45.186 -28.170  7.00  0.00           C  
ATOM   3467  C   CNT A 208     -93.823  44.453 -27.270  0.00  0.00           C  
ATOM   3468  C   CNT A 208     -95.206  44.497 -27.500  0.00  0.00           C  
ATOM   3469  C   CNT A 208     -93.438  45.903 -29.170  2.00  0.00           C  
ATOM   3470  C   CNT A 208     -94.811  45.857 -29.450  8.00  0.00           C  
ATOM   3471  C   CNT A 208     -95.657  45.075 -28.660  9.00  0.00           C  
ATOM   3472  C   CNT A 208     -96.989  44.872 -29.040  5.00  0.00           C  
ATOM   3473  C   CNT A 208     -95.165  46.137 -30.810  6.00  0.00           C  
ATOM   3474  C   CNT A 208     -96.434  45.725 -31.230  9.00  0.00           C  
ATOM   3475  C   CNT A 208     -97.356  45.187 -30.330  4.00  0.00           C  
ATOM   3476  C   CNT A 208     -98.608  44.697 -30.840  6.00  0.00           C  
ATOM   3477  C   CNT A 208     -96.692  45.848 -32.650  5.00  0.00           C  
ATOM   3478  C   CNT A 208     -97.788  45.150 -33.150  9.00  0.00           C  
ATOM   3479  C   CNT A 208     -98.687  44.500 -32.240  6.00  0.00           C  
ATOM   3480  C   CNT A 208     -99.575  43.549 -32.810  7.00  0.00           C  
ATOM   3481  C   CNT A 208     -97.789  44.894 -34.500  8.00  0.00           C  
ATOM   3482  C   CNT A 208     -98.543  43.810 -34.980  0.00  0.00           C  
ATOM   3483  C   CNT A 208     -99.436  43.149 -34.140  8.00  0.00           C  
ATOM   3484  C   CNT A 208    -100.252  42.096 -34.620  3.00  0.00           C  
ATOM   3485  C   CNT A 208     -98.367  43.387 -36.290  4.00  0.00           C  
ATOM   3486  C   CNT A 208     -98.968  42.233 -36.670  5.00  0.00           C  
ATOM   3487  C   CNT A 208     -99.874  41.533 -35.870  4.00  0.00           C  
ATOM   3488  C   CNT A 208    -100.263  40.198 -36.180  3.00  0.00           C  
ATOM   3489  C   CNT A 208     -98.554  41.607 -37.870  0.00  0.00           C  
ATOM   3490  C   CNT A 208     -98.780  40.209 -38.130  3.00  0.00           C  
ATOM   3491  C   CNT A 208     -99.634  39.487 -37.250  5.00  0.00           C  
ATOM   3492  C   CNT A 208     -99.578  38.120 -37.160  4.00  0.00           C  
ATOM   3493  C   CNT A 208     -97.789  39.473 -38.830  2.00  0.00           C  
ATOM   3494  C   CNT A 208     -97.763  38.111 -38.760  3.00  0.00           C  
ATOM   3495  C   CNT A 208     -98.702  37.384 -37.960  7.00  0.00           C  
ATOM   3496  C   CNT A 208     -98.690  35.974 -37.810  1.00  0.00           C  
ATOM   3497  C   CNT A 208     -96.889  37.409 -39.520  9.00  0.00           C  
ATOM   3498  C   CNT A 208     -96.652  36.063 -39.150  4.00  0.00           C  
ATOM   3499  C   CNT A 208     -97.594  35.311 -38.360  9.00  0.00           C  
ATOM   3500  C   CNT A 208     -97.127  34.121 -37.770  2.00  0.00           C  
ATOM   3501  C   CNT A 208     -97.943  33.428 -36.860  4.00  0.00           C  
ATOM   3502  C   CNT A 208     -97.476  32.231 -36.240  4.00  0.00           C  
ATOM   3503  C   CNT A 208     -98.418  31.629 -35.440  5.00  0.00           C  
ATOM   3504  C   CNT A 208     -97.943  30.468 -34.750  4.00  0.00           C  
ATOM   3505  C   CNT A 208     -96.166  31.846 -36.400  9.00  0.00           C  
ATOM   3506  C   CNT A 208     -95.674  30.975 -35.450  6.00  0.00           C  
ATOM   3507  C   CNT A 208     -96.558  30.279 -34.600  1.00  0.00           C  
ATOM   3508  C   CNT A 208     -96.024  29.367 -33.650  8.00  0.00           C  
ATOM   3509  C   CNT A 208     -94.312  30.827 -35.290  1.00  0.00           C  
ATOM   3510  C   CNT A 208     -93.758  30.155 -34.160  2.00  0.00           C  
ATOM   3511  C   CNT A 208     -94.673  29.469 -33.300  7.00  0.00           C  
ATOM   3512  C   CNT A 208     -94.133  29.022 -32.100  2.00  0.00           C  
ATOM   3513  C   CNT A 208     -92.422  30.373 -33.750  1.00  0.00           C  
ATOM   3514  C   CNT A 208     -92.067  30.213 -32.380  9.00  0.00           C  
ATOM   3515  C   CNT A 208     -92.920  29.492 -31.530  5.00  0.00           C  
ATOM   3516  C   CNT A 208     -92.763  29.621 -30.200  1.00  0.00           C  
ATOM   3517  C   CNT A 208     -90.917  30.902 -31.860  8.00  0.00           C  
ATOM   3518  C   CNT A 208     -90.816  30.985 -30.470  8.00  0.00           C  
ATOM   3519  C   CNT A 208     -91.656  30.282 -29.590  8.00  0.00           C  
ATOM   3520  C   CNT A 208     -91.629  30.562 -28.210  4.00  0.00           C  
ATOM   3521  C   CNT A 208     -89.957  31.969 -29.920  8.00  0.00           C  
ATOM   3522  C   CNT A 208     -89.977  32.320 -28.560  2.00  0.00           C  
ATOM   3523  C   CNT A 208     -90.869  31.606 -27.690  4.00  0.00           C  
ATOM   3524  C   CNT A 208     -91.056  32.047 -26.380  9.00  0.00           C  
ATOM   3525  C   CNT A 208     -89.361  33.492 -28.140  5.00  0.00           C  
ATOM   3526  C   CNT A 208     -89.623  33.996 -26.880  0.00  0.00           C  
ATOM   3527  C   CNT A 208     -90.519  33.294 -26.040  6.00  0.00           C  
ATOM   3528  C   CNT A 208     -91.020  33.937 -24.830  1.00  0.00           C  
ATOM   3529  C   CNT A 208     -89.260  35.312 -26.560  6.00  0.00           C  
ATOM   3530  C   CNT A 208     -89.938  35.983 -25.530  0.00  0.00           C  
ATOM   3531  C   CNT A 208     -90.829  35.312 -24.670  8.00  0.00           C  
ATOM   3532  C   CNT A 208     -91.567  36.031 -23.740  6.00  0.00           C  
ATOM   3533  C   CNT A 208     -89.717  37.405 -25.410  3.00  0.00           C  
ATOM   3534  C   CNT A 208     -90.581  38.126 -24.550  7.00  0.00           C  
ATOM   3535  C   CNT A 208     -91.458  37.443 -23.700  2.00  0.00           C  
ATOM   3536  C   CNT A 208     -92.507  38.145 -23.110  1.00  0.00           C  
ATOM   3537  C   CNT A 208     -90.647  39.543 -24.600  5.00  0.00           C  
ATOM   3538  C   CNT A 208     -91.873  40.138 -24.260  3.00  0.00           C  
ATOM   3539  C   CNT A 208     -92.710  39.513 -23.390  1.00  0.00           C  
ATOM   3540  C   CNT A 208     -93.989  40.031 -23.090  8.00  0.00           C  
ATOM   3541  C   CNT A 208     -92.275  41.388 -24.760  6.00  0.00           C  
ATOM   3542  C   CNT A 208     -93.663  41.729 -24.740  4.00  0.00           C  
ATOM   3543  C   CNT A 208     -94.510  41.063 -23.900  9.00  0.00           C  
ATOM   3544  C   CNT A 208     -95.857  41.309 -23.940  1.00  0.00           C  
ATOM   3545  C   CNT A 208     -94.101  42.837 -25.510  3.00  0.00           C  
ATOM   3546  C   CNT A 208     -95.501  42.992 -25.700  3.00  0.00           C  
ATOM   3547  C   CNT A 208     -96.339  42.212 -24.900  8.00  0.00           C  
ATOM   3548  C   CNT A 208     -97.735  42.342 -25.030  1.00  0.00           C  
ATOM   3549  C   CNT A 208     -96.058  43.800 -26.630  6.00  0.00           C  
ATOM   3550  C   CNT A 208     -97.433  43.734 -26.990  9.00  0.00           C  
ATOM   3551  C   CNT A 208     -98.286  43.042 -26.130  8.00  0.00           C  
ATOM   3552  C   CNT A 208     -99.645  42.964 -26.480  8.00  0.00           C  
ATOM   3553  C   CNT A 208     -97.895  44.234 -28.190  1.00  0.00           C  
ATOM   3554  C   CNT A 208     -99.133  43.878 -28.660  7.00  0.00           C  
ATOM   3555  C   CNT A 208    -100.006  43.174 -27.840  3.00  0.00           C  
ATOM   3556  C   CNT A 208    -101.122  42.520 -28.310  5.00  0.00           C  
ATOM   3557  C   CNT A 208     -99.524  44.056 -30.010  4.00  0.00           C  
ATOM   3558  C   CNT A 208    -100.521  43.183 -30.610  6.00  0.00           C  
ATOM   3559  C   CNT A 208    -101.313  42.426 -29.720  6.00  0.00           C  
ATOM   3560  C   CNT A 208    -102.137  41.439 -30.200  3.00  0.00           C  
ATOM   3561  C   CNT A 208    -100.441  42.886 -31.960  3.00  0.00           C  
ATOM   3562  C   CNT A 208    -101.144  41.758 -32.390  2.00  0.00           C  
ATOM   3563  C   CNT A 208    -102.153  41.149 -31.580  6.00  0.00           C  
ATOM   3564  C   CNT A 208    -102.787  40.010 -32.080  0.00  0.00           C  
ATOM   3565  C   CNT A 208    -101.020  41.362 -33.710  8.00  0.00           C  
ATOM   3566  C   CNT A 208    -101.567  40.104 -34.130  0.00  0.00           C  
ATOM   3567  C   CNT A 208    -102.469  39.466 -33.360  4.00  0.00           C  
ATOM   3568  C   CNT A 208    -102.851  38.082 -33.630  4.00  0.00           C  
ATOM   3569  C   CNT A 208    -101.095  39.502 -35.280  1.00  0.00           C  
ATOM   3570  C   CNT A 208    -101.259  38.126 -35.400  5.00  0.00           C  
ATOM   3571  C   CNT A 208    -102.144  37.395 -34.620  5.00  0.00           C  
ATOM   3572  C   CNT A 208    -102.310  36.022 -34.690  9.00  0.00           C  
ATOM   3573  C   CNT A 208    -100.435  37.443 -36.290  4.00  0.00           C  
ATOM   3574  C   CNT A 208    -100.432  36.035 -36.180  9.00  0.00           C  
ATOM   3575  C   CNT A 208    -101.300  35.356 -35.310  1.00  0.00           C  
ATOM   3576  C   CNT A 208    -101.191  33.988 -35.230  6.00  0.00           C  
ATOM   3577  C   CNT A 208     -99.442  35.334 -36.830  2.00  0.00           C  
ATOM   3578  C   CNT A 208     -99.145  34.067 -36.510  2.00  0.00           C  
ATOM   3579  C   CNT A 208    -100.073  33.348 -35.710  5.00  0.00           C  
ATOM   3580  C   CNT A 208     -99.727  32.071 -35.300  1.00  0.00           C  
ATOM   3581  C   CNT A 208    -100.494  31.439 -34.340  4.00  0.00           C  
ATOM   3582  C   CNT A 208    -100.104  30.246 -33.740  4.00  0.00           C  
ATOM   3583  C   CNT A 208    -100.999  29.604 -32.860  5.00  0.00           C  
ATOM   3584  C   CNT A 208    -100.502  28.453 -32.180  2.00  0.00           C  
ATOM   3585  C   CNT A 208     -98.816  29.702 -33.930  6.00  0.00           C  
ATOM   3586  C   CNT A 208     -98.282  28.785 -33.040  2.00  0.00           C  
ATOM   3587  C   CNT A 208     -99.103  28.197 -32.110  3.00  0.00           C  
ATOM   3588  C   CNT A 208     -98.648  27.467 -31.020  3.00  0.00           C  
ATOM   3589  C   CNT A 208     -96.909  28.697 -32.760  7.00  0.00           C  
ATOM   3590  C   CNT A 208     -96.385  28.078 -31.630  9.00  0.00           C  
ATOM   3591  C   CNT A 208     -97.295  27.361 -30.740  1.00  0.00           C  
ATOM   3592  C   CNT A 208     -96.913  27.097 -29.410  1.00  0.00           C  
ATOM   3593  C   CNT A 208     -95.067  28.319 -31.210  9.00  0.00           C  
ATOM   3594  C   CNT A 208     -94.753  28.196 -29.840  3.00  0.00           C  
ATOM   3595  C   CNT A 208     -95.647  27.559 -29.000  2.00  0.00           C  
ATOM   3596  C   CNT A 208     -95.371  27.510 -27.640  3.00  0.00           C  
ATOM   3597  C   CNT A 208     -93.665  28.918 -29.310  1.00  0.00           C  
ATOM   3598  C   CNT A 208     -93.495  29.047 -27.920  4.00  0.00           C  
ATOM   3599  C   CNT A 208     -94.346  28.280 -27.080  6.00  0.00           C  
ATOM   3600  C   CNT A 208     -94.348  28.617 -25.670  4.00  0.00           C  
ATOM   3601  C   CNT A 208     -92.506  29.886 -27.370  8.00  0.00           C  
ATOM   3602  C   CNT A 208     -92.709  30.288 -26.030  4.00  0.00           C  
ATOM   3603  C   CNT A 208     -93.549  29.641 -25.150  5.00  0.00           C  
ATOM   3604  C   CNT A 208     -93.687  30.081 -23.790  6.00  0.00           C  
ATOM   3605  C   CNT A 208     -91.994  31.396 -25.500  5.00  0.00           C  
ATOM   3606  C   CNT A 208     -92.318  31.972 -24.320  2.00  0.00           C  
ATOM   3607  C   CNT A 208     -93.120  31.281 -23.400  6.00  0.00           C  
ATOM   3608  C   CNT A 208     -93.633  31.935 -22.300  9.00  0.00           C  
ATOM   3609  C   CNT A 208     -92.011  33.294 -24.090  4.00  0.00           C  
ATOM   3610  C   CNT A 208     -92.573  33.949 -23.000  0.00  0.00           C  
ATOM   3611  C   CNT A 208     -93.387  33.268 -22.120  0.00  0.00           C  
ATOM   3612  C   CNT A 208     -94.251  33.971 -21.260  2.00  0.00           C  
ATOM   3613  C   CNT A 208     -92.473  35.314 -22.880  8.00  0.00           C  
ATOM   3614  C   CNT A 208     -93.358  36.050 -22.100  8.00  0.00           C  
ATOM   3615  C   CNT A 208     -94.309  35.372 -21.320  7.00  0.00           C  
ATOM   3616  C   CNT A 208     -95.259  36.059 -20.610  1.00  0.00           C  
ATOM   3617  C   CNT A 208     -93.444  37.452 -22.290  1.00  0.00           C  
ATOM   3618  C   CNT A 208     -94.510  38.129 -21.710  6.00  0.00           C  
ATOM   3619  C   CNT A 208     -95.454  37.381 -20.910  7.00  0.00           C  
ATOM   3620  C   CNT A 208     -96.643  38.041 -20.510  1.00  0.00           C  
ATOM   3621  C   CNT A 208     -94.889  39.396 -22.220  3.00  0.00           C  
ATOM   3622  C   CNT A 208     -96.233  39.824 -22.110  9.00  0.00           C  
ATOM   3623  C   CNT A 208     -97.010  39.175 -21.180  2.00  0.00           C  
ATOM   3624  C   CNT A 208     -98.410  39.529 -21.180  3.00  0.00           C  
ATOM   3625  C   CNT A 208     -96.725  40.718 -23.060  6.00  0.00           C  
ATOM   3626  C   CNT A 208     -98.115  40.881 -23.100  8.00  0.00           C  
ATOM   3627  C   CNT A 208     -98.972  40.331 -22.180  3.00  0.00           C  
ATOM   3628  C   CNT A 208    -100.317  40.479 -22.290  5.00  0.00           C  
ATOM   3629  C   CNT A 208     -98.598  41.665 -24.150  6.00  0.00           C  
ATOM   3630  C   CNT A 208     -99.993  41.749 -24.370  9.00  0.00           C  
ATOM   3631  C   CNT A 208    -100.810  41.049 -23.480  1.00  0.00           C  
ATOM   3632  C   CNT A 208    -102.116  40.821 -23.890  5.00  0.00           C  
ATOM   3633  C   CNT A 208    -100.453  42.335 -25.550  9.00  0.00           C  
ATOM   3634  C   CNT A 208    -101.682  41.816 -26.060  3.00  0.00           C  
ATOM   3635  C   CNT A 208    -102.538  41.095 -25.220  4.00  0.00           C  
ATOM   3636  C   CNT A 208    -103.630  40.389 -25.740  8.00  0.00           C  
ATOM   3637  C   CNT A 208    -101.996  41.783 -27.440  1.00  0.00           C  
ATOM   3638  C   CNT A 208    -103.009  41.022 -27.970  2.00  0.00           C  
ATOM   3639  C   CNT A 208    -103.784  40.212 -27.110  0.00  0.00           C  
ATOM   3640  C   CNT A 208    -104.674  39.276 -27.630  9.00  0.00           C  
ATOM   3641  C   CNT A 208    -103.035  40.785 -29.380  8.00  0.00           C  
ATOM   3642  C   CNT A 208    -103.877  39.789 -29.920  8.00  0.00           C  
ATOM   3643  C   CNT A 208    -104.665  39.039 -29.030  8.00  0.00           C  
ATOM   3644  C   CNT A 208    -105.347  37.893 -29.480  4.00  0.00           C  
ATOM   3645  C   CNT A 208    -103.628  39.299 -31.220  0.00  0.00           C  
ATOM   3646  C   CNT A 208    -104.146  38.029 -31.540  5.00  0.00           C  
ATOM   3647  C   CNT A 208    -105.098  37.418 -30.780  0.00  0.00           C  
ATOM   3648  C   CNT A 208    -105.558  36.110 -31.080  6.00  0.00           C  
ATOM   3649  C   CNT A 208    -103.679  37.389 -32.730  4.00  0.00           C  
ATOM   3650  C   CNT A 208    -104.036  36.069 -33.010  0.00  0.00           C  
ATOM   3651  C   CNT A 208    -104.925  35.411 -32.100  9.00  0.00           C  
ATOM   3652  C   CNT A 208    -104.950  33.998 -32.170  5.00  0.00           C  
ATOM   3653  C   CNT A 208    -103.213  35.356 -33.900  9.00  0.00           C  
ATOM   3654  C   CNT A 208    -103.118  33.947 -33.790  1.00  0.00           C  
ATOM   3655  C   CNT A 208    -103.969  33.267 -32.920  5.00  0.00           C  
ATOM   3656  C   CNT A 208    -103.831  31.870 -32.810  1.00  0.00           C  
ATOM   3657  C   CNT A 208    -102.034  33.293 -34.360  9.00  0.00           C  
ATOM   3658  C   CNT A 208    -101.772  31.958 -34.050  4.00  0.00           C  
ATOM   3659  C   CNT A 208    -102.640  31.298 -33.170  2.00  0.00           C  
ATOM   3660  C   CNT A 208    -102.283  30.044 -32.640  9.00  0.00           C  
ATOM   3661  C   CNT A 208    -103.201  29.269 -31.970  0.00  0.00           C  
ATOM   3662  C   CNT A 208    -102.797  28.070 -31.380  5.00  0.00           C  
ATOM   3663  C   CNT A 208    -103.622  27.325 -30.560  7.00  0.00           C  
ATOM   3664  C   CNT A 208    -103.160  26.272 -29.720  4.00  0.00           C  
ATOM   3665  C   CNT A 208    -101.387  27.718 -31.350  1.00  0.00           C  
ATOM   3666  C   CNT A 208    -100.914  26.858 -30.310  1.00  0.00           C  
ATOM   3667  C   CNT A 208    -101.815  26.068 -29.540  3.00  0.00           C  
ATOM   3668  C   CNT A 208    -101.255  25.225 -28.560  7.00  0.00           C  
ATOM   3669  C   CNT A 208     -99.560  26.871 -30.100  9.00  0.00           C  
ATOM   3670  C   CNT A 208     -99.080  26.184 -29.020  1.00  0.00           C  
ATOM   3671  C   CNT A 208     -99.891  25.375 -28.160  6.00  0.00           C  
ATOM   3672  C   CNT A 208     -99.584  25.070 -26.830  6.00  0.00           C  
ATOM   3673  C   CNT A 208     -97.828  26.551 -28.550  3.00  0.00           C  
ATOM   3674  C   CNT A 208     -97.437  26.263 -27.260  9.00  0.00           C  
ATOM   3675  C   CNT A 208     -98.378  25.608 -26.340  9.00  0.00           C  
ATOM   3676  C   CNT A 208     -98.003  25.395 -25.000  4.00  0.00           C  
ATOM   3677  C   CNT A 208     -96.263  26.858 -26.770  0.00  0.00           C  
ATOM   3678  C   CNT A 208     -96.067  26.901 -25.330  8.00  0.00           C  
ATOM   3679  C   CNT A 208     -96.995  26.260 -24.530  9.00  0.00           C  
ATOM   3680  C   CNT A 208     -96.878  26.431 -23.130  7.00  0.00           C  
ATOM   3681  C   CNT A 208     -95.114  27.858 -24.780  5.00  0.00           C  
ATOM   3682  C   CNT A 208     -95.203  28.212 -23.440  7.00  0.00           C  
ATOM   3683  C   CNT A 208     -96.159  27.546 -22.650  5.00  0.00           C  
ATOM   3684  C   CNT A 208     -96.465  28.056 -21.410  5.00  0.00           C  
ATOM   3685  C   CNT A 208     -94.431  29.279 -22.930  1.00  0.00           C  
ATOM   3686  C   CNT A 208     -94.900  29.887 -21.730  9.00  0.00           C  
ATOM   3687  C   CNT A 208     -95.827  29.211 -21.010  1.00  0.00           C  
ATOM   3688  C   CNT A 208     -96.260  29.819 -19.810  0.00  0.00           C  
ATOM   3689  C   CNT A 208     -94.474  31.188 -21.460  0.00  0.00           C  
ATOM   3690  C   CNT A 208     -95.185  31.864 -20.440  7.00  0.00           C  
ATOM   3691  C   CNT A 208     -96.059  31.172 -19.580  2.00  0.00           C  
ATOM   3692  C   CNT A 208     -96.848  31.872 -18.670  5.00  0.00           C  
ATOM   3693  C   CNT A 208     -95.105  33.255 -20.370  3.00  0.00           C  
ATOM   3694  C   CNT A 208     -96.005  33.978 -19.580  5.00  0.00           C  
ATOM   3695  C   CNT A 208     -96.919  33.265 -18.770  7.00  0.00           C  
ATOM   3696  C   CNT A 208     -97.896  34.003 -18.100  3.00  0.00           C  
ATOM   3697  C   CNT A 208     -96.174  35.383 -19.760  1.00  0.00           C  
ATOM   3698  C   CNT A 208     -97.291  36.077 -19.250  6.00  0.00           C  
ATOM   3699  C   CNT A 208     -98.166  35.340 -18.450  0.00  0.00           C  
ATOM   3700  C   CNT A 208     -99.307  36.029 -17.990  0.00  0.00           C  
ATOM   3701  C   CNT A 208     -97.521  37.361 -19.680  3.00  0.00           C  
ATOM   3702  C   CNT A 208     -98.744  37.919 -19.420  0.00  0.00           C  
ATOM   3703  C   CNT A 208     -99.684  37.244 -18.600  8.00  0.00           C  
ATOM   3704  C   CNT A 208    -101.021  37.632 -18.410  9.00  0.00           C  
ATOM   3705  C   CNT A 208     -99.241  38.864 -20.300  4.00  0.00           C  
ATOM   3706  C   CNT A 208    -100.628  38.956 -20.440  6.00  0.00           C  
ATOM   3707  C   CNT A 208    -101.506  38.501 -19.460  5.00  0.00           C  
ATOM   3708  C   CNT A 208    -102.968  38.474 -19.740  5.00  0.00           C  
ATOM   3709  C   CNT A 208    -101.130  39.710 -21.510  0.00  0.00           C  
ATOM   3710  C   CNT A 208    -102.514  39.626 -21.780  3.00  0.00           C  
ATOM   3711  C   CNT A 208    -103.383  38.963 -20.960  5.00  0.00           C  
ATOM   3712  C   CNT A 208    -104.677  38.734 -21.370  8.00  0.00           C  
ATOM   3713  C   CNT A 208    -103.004  40.058 -23.010  4.00  0.00           C  
ATOM   3714  C   CNT A 208    -104.279  39.688 -23.520  5.00  0.00           C  
ATOM   3715  C   CNT A 208    -105.066  38.921 -22.670  3.00  0.00           C  
ATOM   3716  C   CNT A 208    -106.141  38.235 -23.230  2.00  0.00           C  
ATOM   3717  C   CNT A 208    -104.485  39.660 -24.920  5.00  0.00           C  
ATOM   3718  C   CNT A 208    -105.512  38.853 -25.430  0.00  0.00           C  
ATOM   3719  C   CNT A 208    -106.332  38.147 -24.600  8.00  0.00           C  
ATOM   3720  C   CNT A 208    -107.266  37.289 -25.120  1.00  0.00           C  
ATOM   3721  C   CNT A 208    -105.554  38.591 -26.760  5.00  0.00           C  
ATOM   3722  C   CNT A 208    -106.426  37.569 -27.310  9.00  0.00           C  
ATOM   3723  C   CNT A 208    -107.315  36.947 -26.500  9.00  0.00           C  
ATOM   3724  C   CNT A 208    -107.939  35.811 -26.950  3.00  0.00           C  
ATOM   3725  C   CNT A 208    -106.351  37.314 -28.670  5.00  0.00           C  
ATOM   3726  C   CNT A 208    -106.839  36.008 -29.080  9.00  0.00           C  
ATOM   3727  C   CNT A 208    -107.733  35.290 -28.240  2.00  0.00           C  
ATOM   3728  C   CNT A 208    -108.139  33.982 -28.580  9.00  0.00           C  
ATOM   3729  C   CNT A 208    -106.403  35.384 -30.240  7.00  0.00           C  
ATOM   3730  C   CNT A 208    -106.674  34.046 -30.450  6.00  0.00           C  
ATOM   3731  C   CNT A 208    -107.548  33.312 -29.650  2.00  0.00           C  
ATOM   3732  C   CNT A 208    -107.505  31.872 -29.600  4.00  0.00           C  
ATOM   3733  C   CNT A 208    -105.875  33.318 -31.340  3.00  0.00           C  
ATOM   3734  C   CNT A 208    -105.854  31.901 -31.390  2.00  0.00           C  
ATOM   3735  C   CNT A 208    -106.551  31.144 -30.380  8.00  0.00           C  
ATOM   3736  C   CNT A 208    -106.268  29.845 -30.090  8.00  0.00           C  
ATOM   3737  C   CNT A 208    -104.780  31.169 -32.050  3.00  0.00           C  
ATOM   3738  C   CNT A 208    -104.419  29.879 -31.600  8.00  0.00           C  
ATOM   3739  C   CNT A 208    -105.201  29.222 -30.670  4.00  0.00           C  
ATOM   3740  C   CNT A 208    -104.847  27.884 -30.190  1.00  0.00           C  
ATOM   3741  C   CNT A 208    -105.712  27.231 -29.350  9.00  0.00           C  
ATOM   3742  C   CNT A 208    -105.369  26.027 -28.770  0.00  0.00           C  
ATOM   3743  C   CNT A 208    -106.267  25.293 -28.040  4.00  0.00           C  
ATOM   3744  C   CNT A 208    -105.811  24.266 -27.120  7.00  0.00           C  
ATOM   3745  C   CNT A 208    -104.015  25.579 -28.870  8.00  0.00           C  
ATOM   3746  C   CNT A 208    -103.484  24.711 -27.910  6.00  0.00           C  
ATOM   3747  C   CNT A 208    -104.411  24.117 -26.980  5.00  0.00           C  
ATOM   3748  C   CNT A 208    -103.933  23.364 -25.900  8.00  0.00           C  
ATOM   3749  C   CNT A 208    -102.094  24.513 -27.730  2.00  0.00           C  
ATOM   3750  C   CNT A 208    -101.687  24.065 -26.430  6.00  0.00           C  
ATOM   3751  C   CNT A 208    -102.548  23.380 -25.540  0.00  0.00           C  
ATOM   3752  C   CNT A 208    -102.076  22.993 -24.290  7.00  0.00           C  
ATOM   3753  C   CNT A 208    -100.393  24.338 -25.990  9.00  0.00           C  
ATOM   3754  C   CNT A 208     -99.951  24.060 -24.660  7.00  0.00           C  
ATOM   3755  C   CNT A 208    -100.852  23.479 -23.740  5.00  0.00           C  
ATOM   3756  C   CNT A 208    -100.580  23.390 -22.410  1.00  0.00           C  
ATOM   3757  C   CNT A 208     -98.707  24.538 -24.170  0.00  0.00           C  
ATOM   3758  C   CNT A 208     -98.690  24.804 -22.790  2.00  0.00           C  
ATOM   3759  C   CNT A 208     -99.521  24.120 -21.920  6.00  0.00           C  
ATOM   3760  C   CNT A 208     -99.519  24.393 -20.530  8.00  0.00           C  
ATOM   3761  C   CNT A 208     -97.713  25.708 -22.310  4.00  0.00           C  
ATOM   3762  C   CNT A 208     -97.735  26.019 -20.910  2.00  0.00           C  
ATOM   3763  C   CNT A 208     -98.642  25.398 -20.020  4.00  0.00           C  
ATOM   3764  C   CNT A 208     -98.905  25.863 -18.720  8.00  0.00           C  
ATOM   3765  C   CNT A 208     -97.209  27.279 -20.510  3.00  0.00           C  
ATOM   3766  C   CNT A 208     -97.430  27.813 -19.240  3.00  0.00           C  
ATOM   3767  C   CNT A 208     -98.301  27.103 -18.330  7.00  0.00           C  
ATOM   3768  C   CNT A 208     -98.914  27.767 -17.210  9.00  0.00           C  
ATOM   3769  C   CNT A 208     -97.066  29.161 -18.890  1.00  0.00           C  
ATOM   3770  C   CNT A 208     -97.823  29.799 -17.890  4.00  0.00           C  
ATOM   3771  C   CNT A 208     -98.764  29.133 -17.110  4.00  0.00           C  
ATOM   3772  C   CNT A 208     -99.529  29.842 -16.250  5.00  0.00           C  
ATOM   3773  C   CNT A 208     -97.717  31.167 -17.800  1.00  0.00           C  
ATOM   3774  C   CNT A 208     -98.606  31.933 -17.080  0.00  0.00           C  
ATOM   3775  C   CNT A 208     -99.490  31.264 -16.200  1.00  0.00           C  
ATOM   3776  C   CNT A 208    -100.476  31.936 -15.530  4.00  0.00           C  
ATOM   3777  C   CNT A 208     -98.723  33.302 -17.250  1.00  0.00           C  
ATOM   3778  C   CNT A 208     -99.847  33.965 -16.690  8.00  0.00           C  
ATOM   3779  C   CNT A 208    -100.658  33.329 -15.740  3.00  0.00           C  
ATOM   3780  C   CNT A 208    -101.860  33.903 -15.330  8.00  0.00           C  
ATOM   3781  C   CNT A 208    -100.145  35.269 -17.130  5.00  0.00           C  
ATOM   3782  C   CNT A 208    -101.445  35.780 -16.860  6.00  0.00           C  
ATOM   3783  C   CNT A 208    -102.287  35.124 -16.010  0.00  0.00           C  
ATOM   3784  C   CNT A 208    -103.711  35.480 -16.030  0.00  0.00           C  
ATOM   3785  C   CNT A 208    -101.899  36.898 -17.680  6.00  0.00           C  
ATOM   3786  C   CNT A 208    -103.281  37.103 -17.780  6.00  0.00           C  
ATOM   3787  C   CNT A 208    -104.156  36.352 -16.980  4.00  0.00           C  
ATOM   3788  C   CNT A 208    -105.542  36.511 -17.110  7.00  0.00           C  
ATOM   3789  C   CNT A 208    -103.844  37.775 -18.870  3.00  0.00           C  
ATOM   3790  C   CNT A 208    -105.187  37.767 -19.190  2.00  0.00           C  
ATOM   3791  C   CNT A 208    -106.101  37.056 -18.320  4.00  0.00           C  
ATOM   3792  C   CNT A 208    -107.288  36.597 -18.810  2.00  0.00           C  
ATOM   3793  C   CNT A 208    -105.586  38.103 -20.510  0.00  0.00           C  
ATOM   3794  C   CNT A 208    -106.828  37.590 -21.010  4.00  0.00           C  
ATOM   3795  C   CNT A 208    -107.618  36.808 -20.150  7.00  0.00           C  
ATOM   3796  C   CNT A 208    -108.785  36.243 -20.640  6.00  0.00           C  
ATOM   3797  C   CNT A 208    -107.079  37.587 -22.390  5.00  0.00           C  
ATOM   3798  C   CNT A 208    -108.104  36.801 -22.910  5.00  0.00           C  
ATOM   3799  C   CNT A 208    -108.913  36.109 -22.020  3.00  0.00           C  
ATOM   3800  C   CNT A 208    -109.980  35.293 -22.600  8.00  0.00           C  
ATOM   3801  C   CNT A 208    -108.193  36.637 -24.270  2.00  0.00           C  
ATOM   3802  C   CNT A 208    -108.968  35.576 -24.760  4.00  0.00           C  
ATOM   3803  C   CNT A 208    -109.817  34.864 -23.890  7.00  0.00           C  
ATOM   3804  C   CNT A 208    -110.571  33.745 -24.390  9.00  0.00           C  
ATOM   3805  C   CNT A 208    -108.802  35.132 -26.130  1.00  0.00           C  
ATOM   3806  C   CNT A 208    -109.360  33.887 -26.510  0.00  0.00           C  
ATOM   3807  C   CNT A 208    -110.175  33.176 -25.620  0.00  0.00           C  
ATOM   3808  C   CNT A 208    -110.550  31.862 -25.930  1.00  0.00           C  
ATOM   3809  C   CNT A 208    -108.966  33.279 -27.700  3.00  0.00           C  
ATOM   3810  C   CNT A 208    -109.150  31.895 -27.870  2.00  0.00           C  
ATOM   3811  C   CNT A 208    -109.925  31.156 -27.000  4.00  0.00           C  
ATOM   3812  C   CNT A 208    -110.145  29.756 -27.210  6.00  0.00           C  
ATOM   3813  C   CNT A 208    -108.363  31.144 -28.760  1.00  0.00           C  
ATOM   3814  C   CNT A 208    -108.232  29.778 -28.680  4.00  0.00           C  
ATOM   3815  C   CNT A 208    -109.230  29.031 -28.010  4.00  0.00           C  
ATOM   3816  C   CNT A 208    -109.136  27.646 -27.900  9.00  0.00           C  
ATOM   3817  C   CNT A 208    -107.196  29.132 -29.310  3.00  0.00           C  
ATOM   3818  C   CNT A 208    -107.010  27.743 -29.170  4.00  0.00           C  
ATOM   3819  C   CNT A 208    -107.961  27.031 -28.400  2.00  0.00           C  
ATOM   3820  C   CNT A 208    -107.541  25.777 -27.820  2.00  0.00           C  
ATOM   3821  C   CNT A 208    -108.458  25.099 -26.990  3.00  0.00           C  
ATOM   3822  C   CNT A 208    -108.029  23.978 -26.240  5.00  0.00           C  
ATOM   3823  C   CNT A 208    -108.874  23.257 -25.370  7.00  0.00           C  
ATOM   3824  C   CNT A 208    -108.397  22.163 -24.590  9.00  0.00           C  
ATOM   3825  C   CNT A 208    -106.664  23.673 -26.230  9.00  0.00           C  
ATOM   3826  C   CNT A 208    -106.169  22.763 -25.290  6.00  0.00           C  
ATOM   3827  C   CNT A 208    -107.019  22.039 -24.430  9.00  0.00           C  
ATOM   3828  C   CNT A 208    -106.506  21.279 -23.410  1.00  0.00           C  
ATOM   3829  C   CNT A 208    -104.782  22.694 -25.050  8.00  0.00           C  
ATOM   3830  C   CNT A 208    -104.371  22.148 -23.850  8.00  0.00           C  
ATOM   3831  C   CNT A 208    -105.188  21.389 -23.050  0.00  0.00           C  
ATOM   3832  C   CNT A 208    -104.733  20.914 -21.790  0.00  0.00           C  
ATOM   3833  C   CNT A 208    -102.998  22.374 -23.430  6.00  0.00           C  
ATOM   3834  C   CNT A 208    -102.656  22.161 -22.110  2.00  0.00           C  
ATOM   3835  C   CNT A 208    -103.477  21.390 -21.310  7.00  0.00           C  
ATOM   3836  C   CNT A 208    -103.235  21.334 -19.950  5.00  0.00           C  
ATOM   3837  C   CNT A 208    -101.452  22.752 -21.570  0.00  0.00           C  
ATOM   3838  C   CNT A 208    -101.372  22.868 -20.190  3.00  0.00           C  
ATOM   3839  C   CNT A 208    -102.263  22.213 -19.340  9.00  0.00           C  
ATOM   3840  C   CNT A 208    -102.186  22.316 -17.970  3.00  0.00           C  
ATOM   3841  C   CNT A 208    -100.371  23.738 -19.690  3.00  0.00           C  
ATOM   3842  C   CNT A 208    -100.456  24.051 -18.330  7.00  0.00           C  
ATOM   3843  C   CNT A 208    -101.397  23.378 -17.500  6.00  0.00           C  
ATOM   3844  C   CNT A 208    -101.662  23.854 -16.250  1.00  0.00           C  
ATOM   3845  C   CNT A 208     -99.799  25.233 -17.860  7.00  0.00           C  
ATOM   3846  C   CNT A 208    -100.204  25.768 -16.660  2.00  0.00           C  
ATOM   3847  C   CNT A 208    -101.199  25.109 -15.950  0.00  0.00           C  
ATOM   3848  C   CNT A 208    -101.600  25.723 -14.750  7.00  0.00           C  
ATOM   3849  C   CNT A 208     -99.773  27.083 -16.320  8.00  0.00           C  
ATOM   3850  C   CNT A 208    -100.407  27.796 -15.310  3.00  0.00           C  
ATOM   3851  C   CNT A 208    -101.351  27.129 -14.470  3.00  0.00           C  
ATOM   3852  C   CNT A 208    -102.039  27.829 -13.510  1.00  0.00           C  
ATOM   3853  C   CNT A 208    -100.346  29.196 -15.310  8.00  0.00           C  
ATOM   3854  C   CNT A 208    -101.124  29.914 -14.430  1.00  0.00           C  
ATOM   3855  C   CNT A 208    -101.998  29.211 -13.510  8.00  0.00           C  
ATOM   3856  C   CNT A 208    -102.964  29.951 -12.800  2.00  0.00           C  
ATOM   3857  C   CNT A 208    -101.273  31.286 -14.590  4.00  0.00           C  
ATOM   3858  C   CNT A 208    -102.437  31.899 -14.150  1.00  0.00           C  
ATOM   3859  C   CNT A 208    -103.254  31.315 -13.170  3.00  0.00           C  
ATOM   3860  C   CNT A 208    -104.518  31.817 -12.900  2.00  0.00           C  
ATOM   3861  C   CNT A 208    -102.791  33.209 -14.610  7.00  0.00           C  
ATOM   3862  C   CNT A 208    -104.079  33.662 -14.470  3.00  0.00           C  
ATOM   3863  C   CNT A 208    -104.969  32.947 -13.600  5.00  0.00           C  
ATOM   3864  C   CNT A 208    -106.301  33.365 -13.560  4.00  0.00           C  
ATOM   3865  C   CNT A 208    -104.519  34.793 -15.140  2.00  0.00           C  
ATOM   3866  C   CNT A 208    -105.914  35.056 -15.200  0.00  0.00           C  
ATOM   3867  C   CNT A 208    -106.797  34.272 -14.450  0.00  0.00           C  
ATOM   3868  C   CNT A 208    -108.190  34.251 -14.740  3.00  0.00           C  
ATOM   3869  C   CNT A 208    -106.449  35.820 -16.240  9.00  0.00           C  
ATOM   3870  C   CNT A 208    -107.784  35.676 -16.640  4.00  0.00           C  
ATOM   3871  C   CNT A 208    -108.654  34.918 -15.830  4.00  0.00           C  
ATOM   3872  C   CNT A 208    -110.033  34.737 -16.210  4.00  0.00           C  
ATOM   3873  C   CNT A 208    -108.205  35.982 -17.920  1.00  0.00           C  
ATOM   3874  C   CNT A 208    -109.485  35.553 -18.350  2.00  0.00           C  
ATOM   3875  C   CNT A 208    -110.421  35.010 -17.500  8.00  0.00           C  
ATOM   3876  C   CNT A 208    -111.432  34.294 -18.110  5.00  0.00           C  
ATOM   3877  C   CNT A 208    -109.661  35.605 -19.750  9.00  0.00           C  
ATOM   3878  C   CNT A 208    -110.645  34.710 -20.320  7.00  0.00           C  
ATOM   3879  C   CNT A 208    -111.626  34.164 -19.530  1.00  0.00           C  
ATOM   3880  C   CNT A 208    -112.538  33.257 -20.040  9.00  0.00           C  
ATOM   3881  C   CNT A 208    -110.708  34.491 -21.710  2.00  0.00           C  
ATOM   3882  C   CNT A 208    -111.644  33.554 -22.200  9.00  0.00           C  
ATOM   3883  C   CNT A 208    -112.397  32.786 -21.370  6.00  0.00           C  
ATOM   3884  C   CNT A 208    -112.947  31.586 -21.760  3.00  0.00           C  
ATOM   3885  C   CNT A 208    -111.403  33.011 -23.500  9.00  0.00           C  
ATOM   3886  C   CNT A 208    -111.867  31.761 -23.920  9.00  0.00           C  
ATOM   3887  C   CNT A 208    -112.680  31.025 -23.030  1.00  0.00           C  
ATOM   3888  C   CNT A 208    -113.063  29.720 -23.350  3.00  0.00           C  
ATOM   3889  C   CNT A 208    -111.394  31.151 -25.100  1.00  0.00           C  
ATOM   3890  C   CNT A 208    -111.613  29.791 -25.310  9.00  0.00           C  
ATOM   3891  C   CNT A 208    -112.431  29.081 -24.360  8.00  0.00           C  
ATOM   3892  C   CNT A 208    -112.599  27.695 -24.540  0.00  0.00           C  
ATOM   3893  C   CNT A 208    -110.966  29.056 -26.300  3.00  0.00           C  
ATOM   3894  C   CNT A 208    -111.019  27.637 -26.360  7.00  0.00           C  
ATOM   3895  C   CNT A 208    -111.795  26.937 -25.380  1.00  0.00           C  
ATOM   3896  C   CNT A 208    -111.728  25.515 -25.290  5.00  0.00           C  
ATOM   3897  C   CNT A 208    -110.026  26.954 -27.060  5.00  0.00           C  
ATOM   3898  C   CNT A 208    -109.751  25.615 -26.660  5.00  0.00           C  
ATOM   3899  C   CNT A 208    -110.569  24.881 -25.800  7.00  0.00           C  
ATOM   3900  C   CNT A 208    -110.216  23.610 -25.290  4.00  0.00           C  
ATOM   3901  C   CNT A 208    -111.013  22.958 -24.390  2.00  0.00           C  
ATOM   3902  C   CNT A 208    -110.599  21.843 -23.660  9.00  0.00           C  
ATOM   3903  C   CNT A 208    -111.539  21.148 -22.800  5.00  0.00           C  
ATOM   3904  C   CNT A 208    -111.079  20.008 -22.100  8.00  0.00           C  
ATOM   3905  C   CNT A 208    -109.252  21.451 -23.720  0.00  0.00           C  
ATOM   3906  C   CNT A 208    -108.765  20.517 -22.800  2.00  0.00           C  
ATOM   3907  C   CNT A 208    -109.668  19.816 -21.960  4.00  0.00           C  
ATOM   3908  C   CNT A 208    -109.188  19.112 -20.910  3.00  0.00           C  
ATOM   3909  C   CNT A 208    -107.368  20.431 -22.640  2.00  0.00           C  
ATOM   3910  C   CNT A 208    -106.879  19.808 -21.430  8.00  0.00           C  
ATOM   3911  C   CNT A 208    -107.786  19.155 -20.610  8.00  0.00           C  
ATOM   3912  C   CNT A 208    -107.430  18.834 -19.330  7.00  0.00           C  
ATOM   3913  C   CNT A 208    -105.614  20.191 -21.000  9.00  0.00           C  
ATOM   3914  C   CNT A 208    -105.260  19.971 -19.670  9.00  0.00           C  
ATOM   3915  C   CNT A 208    -106.187  19.323 -18.850  6.00  0.00           C  
ATOM   3916  C   CNT A 208    -106.026  19.381 -17.460  4.00  0.00           C  
ATOM   3917  C   CNT A 208    -104.131  20.599 -19.170  9.00  0.00           C  
ATOM   3918  C   CNT A 208    -104.011  20.696 -17.750  2.00  0.00           C  
ATOM   3919  C   CNT A 208    -104.965  20.107 -16.920  6.00  0.00           C  
ATOM   3920  C   CNT A 208    -105.001  20.447 -15.560  7.00  0.00           C  
ATOM   3921  C   CNT A 208    -103.067  21.608 -17.180  1.00  0.00           C  
ATOM   3922  C   CNT A 208    -103.181  22.005 -15.860  9.00  0.00           C  
ATOM   3923  C   CNT A 208    -104.185  21.467 -15.040  0.00  0.00           C  
ATOM   3924  C   CNT A 208    -104.335  21.884 -13.740  5.00  0.00           C  
ATOM   3925  C   CNT A 208    -102.497  23.153 -15.420  2.00  0.00           C  
ATOM   3926  C   CNT A 208    -102.915  23.749 -14.250  5.00  0.00           C  
ATOM   3927  C   CNT A 208    -103.767  23.075 -13.330  5.00  0.00           C  
ATOM   3928  C   CNT A 208    -104.208  23.718 -12.190  8.00  0.00           C  
ATOM   3929  C   CNT A 208    -102.541  25.078 -13.960  9.00  0.00           C  
ATOM   3930  C   CNT A 208    -103.123  25.770 -12.900  1.00  0.00           C  
ATOM   3931  C   CNT A 208    -103.898  25.062 -11.950  8.00  0.00           C  
ATOM   3932  C   CNT A 208    -104.666  25.765 -11.030  5.00  0.00           C  
ATOM   3933  C   CNT A 208    -103.033  27.156 -12.840  2.00  0.00           C  
ATOM   3934  C   CNT A 208    -103.832  27.847 -11.890  6.00  0.00           C  
ATOM   3935  C   CNT A 208    -104.592  27.164 -10.960  0.00  0.00           C  
ATOM   3936  C   CNT A 208    -105.652  27.825 -10.410  9.00  0.00           C  
ATOM   3937  C   CNT A 208    -103.961  29.202 -12.080  2.00  0.00           C  
ATOM   3938  C   CNT A 208    -105.056  29.892 -11.560  5.00  0.00           C  
ATOM   3939  C   CNT A 208    -105.839  29.182 -10.650  5.00  0.00           C  
ATOM   3940  C   CNT A 208    -107.130  29.738 -10.350  4.00  0.00           C  
ATOM   3941  C   CNT A 208    -105.427  31.134 -12.070  7.00  0.00           C  
ATOM   3942  C   CNT A 208    -106.661  31.691 -11.790  4.00  0.00           C  
ATOM   3943  C   CNT A 208    -107.542  30.932 -10.970  6.00  0.00           C  
ATOM   3944  C   CNT A 208    -108.866  31.351 -10.850  1.00  0.00           C  
ATOM   3945  C   CNT A 208    -107.151  32.761 -12.610  1.00  0.00           C  
ATOM   3946  C   CNT A 208    -108.573  32.835 -12.770  5.00  0.00           C  
ATOM   3947  C   CNT A 208    -109.409  32.225 -11.870  3.00  0.00           C  
ATOM   3948  C   CNT A 208    -110.779  32.251 -12.040  9.00  0.00           C  
ATOM   3949  C   CNT A 208    -109.024  33.656 -13.780  6.00  0.00           C  
ATOM   3950  C   CNT A 208    -110.420  33.577 -14.120  9.00  0.00           C  
ATOM   3951  C   CNT A 208    -111.277  32.955 -13.190  6.00  0.00           C  
ATOM   3952  C   CNT A 208    -112.595  32.677 -13.640  8.00  0.00           C  
ATOM   3953  C   CNT A 208    -110.907  34.157 -15.360  2.00  0.00           C  
ATOM   3954  C   CNT A 208    -112.148  33.684 -15.890  0.00  0.00           C  
ATOM   3955  C   CNT A 208    -112.954  32.928 -15.030  5.00  0.00           C  
ATOM   3956  C   CNT A 208    -114.073  32.241 -15.500  9.00  0.00           C  
ATOM   3957  C   CNT A 208    -112.332  33.618 -17.230  1.00  0.00           C  
ATOM   3958  C   CNT A 208    -113.420  32.900 -17.750  3.00  0.00           C  
ATOM   3959  C   CNT A 208    -114.289  32.218 -16.940  5.00  0.00           C  
ATOM   3960  C   CNT A 208    -115.130  31.215 -17.450  2.00  0.00           C  
ATOM   3961  C   CNT A 208    -113.325  32.520 -19.110  0.00  0.00           C  
ATOM   3962  C   CNT A 208    -114.076  31.498 -19.620  6.00  0.00           C  
ATOM   3963  C   CNT A 208    -114.926  30.773 -18.800  5.00  0.00           C  
ATOM   3964  C   CNT A 208    -115.569  29.611 -19.250  9.00  0.00           C  
ATOM   3965  C   CNT A 208    -113.832  30.941 -20.860  7.00  0.00           C  
ATOM   3966  C   CNT A 208    -114.273  29.649 -21.260  3.00  0.00           C  
ATOM   3967  C   CNT A 208    -115.131  28.985 -20.440  4.00  0.00           C  
ATOM   3968  C   CNT A 208    -115.466  27.665 -20.610  6.00  0.00           C  
ATOM   3969  C   CNT A 208    -113.913  29.078 -22.440  5.00  0.00           C  
ATOM   3970  C   CNT A 208    -114.126  27.736 -22.610  7.00  0.00           C  
ATOM   3971  C   CNT A 208    -114.914  27.025 -21.710  2.00  0.00           C  
ATOM   3972  C   CNT A 208    -115.055  25.630 -21.790  5.00  0.00           C  
ATOM   3973  C   CNT A 208    -113.445  27.024 -23.640  3.00  0.00           C  
ATOM   3974  C   CNT A 208    -113.444  25.614 -23.600  1.00  0.00           C  
ATOM   3975  C   CNT A 208    -114.261  24.932 -22.720  1.00  0.00           C  
ATOM   3976  C   CNT A 208    -114.211  23.555 -22.620  4.00  0.00           C  
ATOM   3977  C   CNT A 208    -112.533  24.883 -24.390  1.00  0.00           C  
ATOM   3978  C   CNT A 208    -112.262  23.541 -24.030  3.00  0.00           C  
ATOM   3979  C   CNT A 208    -113.122  22.835 -23.170  2.00  0.00           C  
ATOM   3980  C   CNT A 208    -112.785  21.624 -22.610  0.00  0.00           C  
ATOM   3981  C   CNT A 208    -113.703  20.958 -21.790  9.00  0.00           C  
ATOM   3982  C   CNT A 208    -113.327  19.782 -21.150  4.00  0.00           C  
ATOM   3983  C   CNT A 208    -114.210  19.106 -20.300  8.00  0.00           C  
ATOM   3984  C   CNT A 208    -113.728  18.040 -19.560  0.00  0.00           C  
ATOM   3985  C   CNT A 208    -111.975  19.370 -21.280  5.00  0.00           C  
ATOM   3986  C   CNT A 208    -111.489  18.477 -20.340  4.00  0.00           C  
ATOM   3987  C   CNT A 208    -112.348  17.772 -19.530  3.00  0.00           C  
ATOM   3988  C   CNT A 208    -111.837  17.079 -18.410  3.00  0.00           C  
ATOM   3989  C   CNT A 208    -110.076  18.386 -20.110  3.00  0.00           C  
ATOM   3990  C   CNT A 208    -109.601  17.836 -18.880  6.00  0.00           C  
ATOM   3991  C   CNT A 208    -110.486  17.163 -18.020  8.00  0.00           C  
ATOM   3992  C   CNT A 208    -110.103  16.777 -16.700  2.00  0.00           C  
ATOM   3993  C   CNT A 208    -108.336  18.182 -18.490  4.00  0.00           C  
ATOM   3994  C   CNT A 208    -108.032  18.014 -17.130  3.00  0.00           C  
ATOM   3995  C   CNT A 208    -108.874  17.227 -16.300  7.00  0.00           C  
ATOM   3996  C   CNT A 208    -108.570  17.206 -14.900  4.00  0.00           C  
ATOM   3997  C   CNT A 208    -106.931  18.802 -16.650  4.00  0.00           C  
ATOM   3998  C   CNT A 208    -106.792  18.883 -15.260  4.00  0.00           C  
ATOM   3999  C   CNT A 208    -107.629  18.154 -14.400  6.00  0.00           C  
ATOM   4000  C   CNT A 208    -107.719  18.524 -13.000  8.00  0.00           C  
ATOM   4001  C   CNT A 208    -105.917  19.786 -14.700  3.00  0.00           C  
ATOM   4002  C   CNT A 208    -106.079  20.200 -13.430  1.00  0.00           C  
ATOM   4003  C   CNT A 208    -106.887  19.556 -12.520  4.00  0.00           C  
ATOM   4004  C   CNT A 208    -107.017  19.997 -11.200  2.00  0.00           C  
ATOM   4005  C   CNT A 208    -105.249  21.243 -12.970  3.00  0.00           C  
ATOM   4006  C   CNT A 208    -105.551  21.776 -11.680  4.00  0.00           C  
ATOM   4007  C   CNT A 208    -106.331  21.080 -10.750  6.00  0.00           C  
ATOM   4008  C   CNT A 208    -106.675  21.661  -9.530  3.00  0.00           C  
ATOM   4009  C   CNT A 208    -105.041  23.080 -11.280  3.00  0.00           C  
ATOM   4010  C   CNT A 208    -105.700  23.744 -10.250  7.00  0.00           C  
ATOM   4011  C   CNT A 208    -106.406  23.011  -9.320  0.00  0.00           C  
ATOM   4012  C   CNT A 208    -107.082  23.724  -8.300  3.00  0.00           C  
ATOM   4013  C   CNT A 208    -105.476  25.109 -10.100  1.00  0.00           C  
ATOM   4014  C   CNT A 208    -106.242  25.821  -9.200  2.00  0.00           C  
ATOM   4015  C   CNT A 208    -107.057  25.090  -8.320  1.00  0.00           C  
ATOM   4016  C   CNT A 208    -108.130  25.754  -7.770  8.00  0.00           C  
ATOM   4017  C   CNT A 208    -106.460  27.187  -9.450  3.00  0.00           C  
ATOM   4018  C   CNT A 208    -107.517  27.836  -8.900  7.00  0.00           C  
ATOM   4019  C   CNT A 208    -108.365  27.090  -8.050  0.00  0.00           C  
ATOM   4020  C   CNT A 208    -109.648  27.666  -7.750  8.00  0.00           C  
ATOM   4021  C   CNT A 208    -107.986  29.083  -9.470  5.00  0.00           C  
ATOM   4022  C   CNT A 208    -109.252  29.570  -9.280  9.00  0.00           C  
ATOM   4023  C   CNT A 208    -110.114  28.818  -8.430  5.00  0.00           C  
ATOM   4024  C   CNT A 208    -111.450  29.152  -8.370  9.00  0.00           C  
ATOM   4025  C   CNT A 208    -109.778  30.622 -10.010  1.00  0.00           C  
ATOM   4026  C   CNT A 208    -111.170  30.749 -10.150  8.00  0.00           C  
ATOM   4027  C   CNT A 208    -112.001  29.999  -9.330  0.00  0.00           C  
ATOM   4028  C   CNT A 208    -113.360  29.921  -9.630  5.00  0.00           C  
ATOM   4029  C   CNT A 208    -111.649  31.529 -11.230  1.00  0.00           C  
ATOM   4030  C   CNT A 208    -112.988  31.437 -11.610  1.00  0.00           C  
ATOM   4031  C   CNT A 208    -113.833  30.622 -10.750  7.00  0.00           C  
ATOM   4032  C   CNT A 208    -115.093  30.220 -11.200  5.00  0.00           C  
ATOM   4033  C   CNT A 208    -113.406  31.861 -12.880  1.00  0.00           C  
ATOM   4034  C   CNT A 208    -114.658  31.365 -13.370  1.00  0.00           C  
ATOM   4035  C   CNT A 208    -115.471  30.564 -12.490  5.00  0.00           C  
ATOM   4036  C   CNT A 208    -116.590  29.906 -13.010  1.00  0.00           C  
ATOM   4037  C   CNT A 208    -114.966  31.515 -14.700  9.00  0.00           C  
ATOM   4038  C   CNT A 208    -115.949  30.673 -15.250  3.00  0.00           C  
ATOM   4039  C   CNT A 208    -116.764  29.954 -14.380  3.00  0.00           C  
ATOM   4040  C   CNT A 208    -117.737  29.130 -14.950  7.00  0.00           C  
ATOM   4041  C   CNT A 208    -116.029  30.553 -16.620  0.00  0.00           C  
ATOM   4042  C   CNT A 208    -116.825  29.543 -17.140  7.00  0.00           C  
ATOM   4043  C   CNT A 208    -117.700  28.810 -16.320  9.00  0.00           C  
ATOM   4044  C   CNT A 208    -118.287  27.596 -16.750  2.00  0.00           C  
ATOM   4045  C   CNT A 208    -116.536  29.009 -18.440  6.00  0.00           C  
ATOM   4046  C   CNT A 208    -117.010  27.707 -18.760  9.00  0.00           C  
ATOM   4047  C   CNT A 208    -117.894  27.027 -17.950  6.00  0.00           C  
ATOM   4048  C   CNT A 208    -118.228  25.707 -18.210  2.00  0.00           C  
ATOM   4049  C   CNT A 208    -116.474  27.033 -19.880  1.00  0.00           C  
ATOM   4050  C   CNT A 208    -116.783  25.691 -20.130  6.00  0.00           C  
ATOM   4051  C   CNT A 208    -117.754  25.054 -19.340  6.00  0.00           C  
ATOM   4052  C   CNT A 208    -117.917  23.667 -19.530  7.00  0.00           C  
ATOM   4053  C   CNT A 208    -116.094  24.954 -21.060  7.00  0.00           C  
ATOM   4054  C   CNT A 208    -116.182  23.554 -21.140  5.00  0.00           C  
ATOM   4055  C   CNT A 208    -117.042  22.951 -20.320  5.00  0.00           C  
ATOM   4056  C   CNT A 208    -116.948  21.553 -20.140  3.00  0.00           C  
ATOM   4057  C   CNT A 208    -115.183  22.860 -21.900  0.00  0.00           C  
ATOM   4058  C   CNT A 208    -114.949  21.520 -21.530  8.00  0.00           C  
ATOM   4059  C   CNT A 208    -115.854  20.841 -20.670  7.00  0.00           C  
ATOM   4060  C   CNT A 208    -115.453  19.638 -20.020  8.00  0.00           C  
ATOM   4061  C   CNT A 208    -116.352  18.958 -19.240  2.00  0.00           C  
ATOM   4062  C   CNT A 208    -115.947  17.753 -18.700  0.00  0.00           C  
ATOM   4063  C   CNT A 208    -116.897  16.999 -17.960  0.00  0.00           C  
ATOM   4064  C   CNT A 208    -116.411  15.913 -17.150  3.00  0.00           C  
ATOM   4065  C   CNT A 208    -114.610  17.376 -18.740  5.00  0.00           C  
ATOM   4066  C   CNT A 208    -114.075  16.603 -17.670  9.00  0.00           C  
ATOM   4067  C   CNT A 208    -114.994  15.857 -16.900  6.00  0.00           C  
ATOM   4068  C   CNT A 208    -114.501  15.058 -15.770  4.00  0.00           C  
ATOM   4069  C   CNT A 208    -112.708  16.354 -17.520  1.00  0.00           C  
ATOM   4070  C   CNT A 208    -112.223  15.672 -16.350  9.00  0.00           C  
ATOM   4071  C   CNT A 208    -113.154  15.086 -15.480  3.00  0.00           C  
ATOM   4072  C   CNT A 208    -112.770  14.827 -14.140  5.00  0.00           C  
ATOM   4073  C   CNT A 208    -110.956  16.016 -15.880  8.00  0.00           C  
ATOM   4074  C   CNT A 208    -110.623  15.896 -14.550  0.00  0.00           C  
ATOM   4075  C   CNT A 208    -111.545  15.280 -13.610  3.00  0.00           C  
ATOM   4076  C   CNT A 208    -111.206  15.318 -12.230  7.00  0.00           C  
ATOM   4077  C   CNT A 208    -109.508  16.645 -14.010  9.00  0.00           C  
ATOM   4078  C   CNT A 208    -109.493  16.867 -12.620  0.00  0.00           C  
ATOM   4079  C   CNT A 208    -110.233  16.129 -11.740  0.00  0.00           C  
ATOM   4080  C   CNT A 208    -110.156  16.387 -10.320  3.00  0.00           C  
ATOM   4081  C   CNT A 208    -108.615  17.819 -12.160  1.00  0.00           C  
ATOM   4082  C   CNT A 208    -108.422  18.053 -10.800  3.00  0.00           C  
ATOM   4083  C   CNT A 208    -109.248  17.363  -9.900  7.00  0.00           C  
ATOM   4084  C   CNT A 208    -109.372  17.775  -8.560  4.00  0.00           C  
ATOM   4085  C   CNT A 208    -107.724  19.178 -10.310  4.00  0.00           C  
ATOM   4086  C   CNT A 208    -107.928  19.673  -9.010  5.00  0.00           C  
ATOM   4087  C   CNT A 208    -108.817  19.004  -8.180  9.00  0.00           C  
ATOM   4088  C   CNT A 208    -109.270  19.563  -6.950  8.00  0.00           C  
ATOM   4089  C   CNT A 208    -107.597  20.998  -8.700  8.00  0.00           C  
ATOM   4090  C   CNT A 208    -108.141  21.604  -7.550  2.00  0.00           C  
ATOM   4091  C   CNT A 208    -109.020  20.935  -6.730  0.00  0.00           C  
ATOM   4092  C   CNT A 208    -109.667  21.679  -5.780  0.00  0.00           C  
ATOM   4093  C   CNT A 208    -107.929  22.985  -7.490  1.00  0.00           C  
ATOM   4094  C   CNT A 208    -108.828  23.688  -6.690  6.00  0.00           C  
ATOM   4095  C   CNT A 208    -109.671  23.063  -5.810  8.00  0.00           C  
ATOM   4096  C   CNT A 208    -110.854  23.693  -5.290  8.00  0.00           C  
ATOM   4097  C   CNT A 208    -108.997  25.055  -6.910  6.00  0.00           C  
ATOM   4098  C   CNT A 208    -110.157  25.699  -6.420  7.00  0.00           C  
ATOM   4099  C   CNT A 208    -111.049  25.087  -5.510  0.00  0.00           C  
ATOM   4100  C   CNT A 208    -112.317  25.607  -5.210  5.00  0.00           C  
ATOM   4101  C   CNT A 208    -110.515  26.977  -6.860  0.00  0.00           C  
ATOM   4102  C   CNT A 208    -111.805  27.468  -6.680  8.00  0.00           C  
ATOM   4103  C   CNT A 208    -112.698  26.806  -5.770  4.00  0.00           C  
ATOM   4104  C   CNT A 208    -114.066  27.148  -5.730  4.00  0.00           C  
ATOM   4105  C   CNT A 208    -112.347  28.524  -7.450  0.00  0.00           C  
ATOM   4106  C   CNT A 208    -113.706  28.803  -7.510  9.00  0.00           C  
ATOM   4107  C   CNT A 208    -114.647  28.038  -6.700  8.00  0.00           C  
ATOM   4108  C   CNT A 208    -115.969  27.956  -6.980  6.00  0.00           C  
ATOM   4109  C   CNT A 208    -114.222  29.416  -8.710  0.00  0.00           C  
ATOM   4110  C   CNT A 208    -115.532  29.176  -9.070  9.00  0.00           C  
ATOM   4111  C   CNT A 208    -116.409  28.490  -8.260  2.00  0.00           C  
ATOM   4112  C   CNT A 208    -117.700  28.194  -8.750  2.00  0.00           C  
ATOM   4113  C   CNT A 208    -115.970  29.559 -10.330  5.00  0.00           C  
ATOM   4114  C   CNT A 208    -117.190  29.112 -10.840  1.00  0.00           C  
ATOM   4115  C   CNT A 208    -118.088  28.442 -10.050  2.00  0.00           C  
ATOM   4116  C   CNT A 208    -119.263  27.951 -10.530  8.00  0.00           C  
ATOM   4117  C   CNT A 208    -117.468  29.239 -12.190  1.00  0.00           C  
ATOM   4118  C   CNT A 208    -118.502  28.482 -12.710  9.00  0.00           C  
ATOM   4119  C   CNT A 208    -119.451  27.881 -11.920  1.00  0.00           C  
ATOM   4120  C   CNT A 208    -120.516  27.140 -12.500  1.00  0.00           C  
ATOM   4121  C   CNT A 208    -118.597  28.370 -14.090  6.00  0.00           C  
ATOM   4122  C   CNT A 208    -119.421  27.366 -14.630  1.00  0.00           C  
ATOM   4123  C   CNT A 208    -120.381  26.715 -13.810  8.00  0.00           C  
ATOM   4124  C   CNT A 208    -121.011  25.568 -14.250  9.00  0.00           C  
ATOM   4125  C   CNT A 208    -119.214  26.929 -15.920  0.00  0.00           C  
ATOM   4126  C   CNT A 208    -119.732  25.714 -16.340  5.00  0.00           C  
ATOM   4127  C   CNT A 208    -120.677  25.027 -15.480  2.00  0.00           C  
ATOM   4128  C   CNT A 208    -121.205  23.814 -15.910  5.00  0.00           C  
ATOM   4129  C   CNT A 208    -119.226  25.103 -17.540  7.00  0.00           C  
ATOM   4130  C   CNT A 208    -119.595  23.767 -17.710  2.00  0.00           C  
ATOM   4131  C   CNT A 208    -120.497  23.074 -16.900  3.00  0.00           C  
ATOM   4132  C   CNT A 208    -120.605  21.673 -16.910  2.00  0.00           C  
ATOM   4133  C   CNT A 208    -118.823  23.007 -18.620  0.00  0.00           C  
ATOM   4134  C   CNT A 208    -118.691  21.616 -18.480  0.00  0.00           C  
ATOM   4135  C   CNT A 208    -119.700  20.941 -17.760  5.00  0.00           C  
ATOM   4136  C   CNT A 208    -119.562  19.541 -17.560  2.00  0.00           C  
ATOM   4137  C   CNT A 208    -117.762  20.847 -19.250  3.00  0.00           C  
ATOM   4138  C   CNT A 208    -117.546  19.526 -18.850  4.00  0.00           C  
ATOM   4139  C   CNT A 208    -118.488  18.856 -18.090  2.00  0.00           C  
ATOM   4140  C   CNT A 208    -118.152  17.566 -17.600  5.00  0.00           C  
ATOM   4141  C   CNT A 208    -119.029  16.870 -16.720  1.00  0.00           C  
ATOM   4142  C   CNT A 208    -118.591  15.655 -16.120  8.00  0.00           C  
ATOM   4143  C   CNT A 208    -119.388  15.025 -15.210  9.00  0.00           C  
ATOM   4144  C   CNT A 208    -118.946  13.980 -14.440  4.00  0.00           C  
ATOM   4145  C   CNT A 208    -117.269  15.258 -16.200  9.00  0.00           C  
ATOM   4146  C   CNT A 208    -116.766  14.304 -15.240  7.00  0.00           C  
ATOM   4147  C   CNT A 208    -117.618  13.676 -14.370  5.00  0.00           C  
ATOM   4148  C   CNT A 208    -117.127  12.978 -13.300  0.00  0.00           C  
ATOM   4149  C   CNT A 208    -115.407  14.407 -14.910  8.00  0.00           C  
ATOM   4150  C   CNT A 208    -114.936  13.929 -13.690  2.00  0.00           C  
ATOM   4151  C   CNT A 208    -115.765  13.135 -12.890  2.00  0.00           C  
ATOM   4152  C   CNT A 208    -115.379  12.965 -11.510  1.00  0.00           C  
ATOM   4153  C   CNT A 208    -113.679  14.318 -13.220  7.00  0.00           C  
ATOM   4154  C   CNT A 208    -113.335  14.248 -11.860  6.00  0.00           C  
ATOM   4155  C   CNT A 208    -114.232  13.564 -11.010  7.00  0.00           C  
ATOM   4156  C   CNT A 208    -113.943  13.482  -9.640  9.00  0.00           C  
ATOM   4157  C   CNT A 208    -112.138  14.696 -11.370  5.00  0.00           C  
ATOM   4158  C   CNT A 208    -111.915  14.772  -9.980  4.00  0.00           C  
ATOM   4159  C   CNT A 208    -112.819  14.130  -9.150  1.00  0.00           C  
ATOM   4160  C   CNT A 208    -112.741  14.332  -7.750  4.00  0.00           C  
ATOM   4161  C   CNT A 208    -110.956  15.698  -9.470  4.00  0.00           C  
ATOM   4162  C   CNT A 208    -110.960  15.924  -8.100  1.00  0.00           C  
ATOM   4163  C   CNT A 208    -111.973  15.391  -7.270  8.00  0.00           C  
ATOM   4164  C   CNT A 208    -112.111  15.773  -5.950  9.00  0.00           C  
ATOM   4165  C   CNT A 208    -110.332  17.144  -7.690  9.00  0.00           C  
ATOM   4166  C   CNT A 208    -110.744  17.739  -6.510  4.00  0.00           C  
ATOM   4167  C   CNT A 208    -111.520  17.019  -5.610  0.00  0.00           C  
ATOM   4168  C   CNT A 208    -111.896  17.610  -4.410  3.00  0.00           C  
ATOM   4169  C   CNT A 208    -110.159  18.930  -6.110  5.00  0.00           C  
ATOM   4170  C   CNT A 208    -110.614  19.645  -5.000  1.00  0.00           C  
ATOM   4171  C   CNT A 208    -111.509  18.921  -4.190  6.00  0.00           C  
ATOM   4172  C   CNT A 208    -112.321  19.625  -3.260  5.00  0.00           C  
ATOM   4173  C   CNT A 208    -110.602  21.027  -4.970  3.00  0.00           C  
ATOM   4174  C   CNT A 208    -111.520  21.697  -4.150  9.00  0.00           C  
ATOM   4175  C   CNT A 208    -112.360  21.034  -3.280  8.00  0.00           C  
ATOM   4176  C   CNT A 208    -113.371  21.712  -2.620  1.00  0.00           C  
ATOM   4177  C   CNT A 208    -111.733  23.018  -4.450  3.00  0.00           C  
ATOM   4178  C   CNT A 208    -112.827  23.673  -3.820  7.00  0.00           C  
ATOM   4179  C   CNT A 208    -113.648  23.045  -2.910  2.00  0.00           C  
ATOM   4180  C   CNT A 208    -114.861  23.621  -2.580  1.00  0.00           C  
ATOM   4181  C   CNT A 208    -113.119  24.968  -4.260  8.00  0.00           C  
ATOM   4182  C   CNT A 208    -114.421  25.530  -4.000  8.00  0.00           C  
ATOM   4183  C   CNT A 208    -115.349  24.748  -3.240  5.00  0.00           C  
ATOM   4184  C   CNT A 208    -116.704  25.097  -3.220  9.00  0.00           C  
ATOM   4185  C   CNT A 208    -114.968  26.481  -4.910  3.00  0.00           C  
ATOM   4186  C   CNT A 208    -116.329  26.663  -5.050  3.00  0.00           C  
ATOM   4187  C   CNT A 208    -117.225  26.018  -4.140  4.00  0.00           C  
ATOM   4188  C   CNT A 208    -118.587  26.069  -4.400  0.00  0.00           C  
ATOM   4189  C   CNT A 208    -116.841  27.251  -6.180  4.00  0.00           C  
ATOM   4190  C   CNT A 208    -118.208  27.155  -6.560  4.00  0.00           C  
ATOM   4191  C   CNT A 208    -119.009  26.455  -5.660  2.00  0.00           C  
ATOM   4192  C   CNT A 208    -120.298  26.107  -6.080  6.00  0.00           C  
ATOM   4193  C   CNT A 208    -118.532  27.457  -7.850  4.00  0.00           C  
ATOM   4194  C   CNT A 208    -119.753  27.031  -8.350  1.00  0.00           C  
ATOM   4195  C   CNT A 208    -120.601  26.381  -7.430  0.00  0.00           C  
ATOM   4196  C   CNT A 208    -121.753  25.787  -7.970  6.00  0.00           C  
ATOM   4197  C   CNT A 208    -120.062  27.088  -9.740  2.00  0.00           C  
ATOM   4198  C   CNT A 208    -121.153  26.466 -10.260  6.00  0.00           C  
ATOM   4199  C   CNT A 208    -121.915  25.731  -9.390  3.00  0.00           C  
ATOM   4200  C   CNT A 208    -122.847  24.752  -9.840  8.00  0.00           C  
ATOM   4201  C   CNT A 208    -121.425  26.444 -11.660  3.00  0.00           C  
ATOM   4202  C   CNT A 208    -122.155  25.369 -12.150  1.00  0.00           C  
ATOM   4203  C   CNT A 208    -122.915  24.565 -11.290  7.00  0.00           C  
ATOM   4204  C   CNT A 208    -123.654  23.492 -11.800  5.00  0.00           C  
ATOM   4205  C   CNT A 208    -121.902  24.894 -13.430  8.00  0.00           C  
ATOM   4206  C   CNT A 208    -122.431  23.666 -13.870  1.00  0.00           C  
ATOM   4207  C   CNT A 208    -123.363  22.972 -13.040  3.00  0.00           C  
ATOM   4208  C   CNT A 208    -123.878  21.716 -13.430  7.00  0.00           C  
ATOM   4209  C   CNT A 208    -122.010  23.034 -15.040  6.00  0.00           C  
ATOM   4210  C   CNT A 208    -122.205  21.656 -15.170  4.00  0.00           C  
ATOM   4211  C   CNT A 208    -123.178  21.005 -14.410  9.00  0.00           C  
ATOM   4212  C   CNT A 208    -123.309  19.598 -14.490  4.00  0.00           C  
ATOM   4213  C   CNT A 208    -121.544  20.962 -16.170  8.00  0.00           C  
ATOM   4214  C   CNT A 208    -121.449  19.564 -16.070  5.00  0.00           C  
ATOM   4215  C   CNT A 208    -122.227  18.879 -15.080  9.00  0.00           C  
ATOM   4216  C   CNT A 208    -122.039  17.522 -14.890  1.00  0.00           C  
ATOM   4217  C   CNT A 208    -120.468  18.827 -16.780  4.00  0.00           C  
ATOM   4218  C   CNT A 208    -120.205  17.497 -16.370  3.00  0.00           C  
ATOM   4219  C   CNT A 208    -121.039  16.821 -15.440  8.00  0.00           C  
ATOM   4220  C   CNT A 208    -120.648  15.501 -14.910  8.00  0.00           C  
ATOM   4221  C   CNT A 208    -121.561  14.825 -14.090  0.00  0.00           C  
ATOM   4222  C   CNT A 208    -121.146  13.632 -13.480  6.00  0.00           C  
ATOM   4223  C   CNT A 208    -122.106  12.879 -12.820  8.00  0.00           C  
ATOM   4224  C   CNT A 208    -121.587  11.719 -12.210  7.00  0.00           C  
ATOM   4225  C   CNT A 208    -119.865  13.185 -13.680  1.00  0.00           C  
ATOM   4226  C   CNT A 208    -119.330  12.208 -12.790  0.00  0.00           C  
ATOM   4227  C   CNT A 208    -120.248  11.457 -11.970  9.00  0.00           C  
ATOM   4228  C   CNT A 208    -119.548  10.753 -11.020  1.00  0.00           C  
ATOM   4229  C   CNT A 208    -117.942  12.241 -12.500  4.00  0.00           C  
ATOM   4230  C   CNT A 208    -117.483  11.822 -11.240  7.00  0.00           C  
ATOM   4231  C   CNT A 208    -118.364  11.113 -10.380  9.00  0.00           C  
ATOM   4232  C   CNT A 208    -117.939  10.868  -9.080  9.00  0.00           C  
ATOM   4233  C   CNT A 208    -116.287  12.353 -10.630  9.00  0.00           C  
ATOM   4234  C   CNT A 208    -115.906  12.096  -9.330  2.00  0.00           C  
ATOM   4235  C   CNT A 208    -116.768  11.374  -8.460  6.00  0.00           C  
ATOM   4236  C   CNT A 208    -116.353  11.251  -7.120  3.00  0.00           C  
ATOM   4237  C   CNT A 208    -114.761  12.740  -8.800  1.00  0.00           C  
ATOM   4238  C   CNT A 208    -114.661  12.904  -7.390  5.00  0.00           C  
ATOM   4239  C   CNT A 208    -115.370  12.026  -6.540  4.00  0.00           C  
ATOM   4240  C   CNT A 208    -115.106  12.170  -5.190  8.00  0.00           C  
ATOM   4241  C   CNT A 208    -113.670  13.751  -6.880  2.00  0.00           C  
ATOM   4242  C   CNT A 208    -113.598  13.950  -5.480  6.00  0.00           C  
ATOM   4243  C   CNT A 208    -114.423  13.203  -4.620  0.00  0.00           C  
ATOM   4244  C   CNT A 208    -114.691  13.750  -3.380  2.00  0.00           C  
ATOM   4245  C   CNT A 208    -112.900  15.079  -5.050  8.00  0.00           C  
ATOM   4246  C   CNT A 208    -113.072  15.532  -3.780  1.00  0.00           C  
ATOM   4247  C   CNT A 208    -113.990  14.875  -2.880  3.00  0.00           C  
ATOM   4248  C   CNT A 208    -114.245  15.532  -1.700  0.00  0.00           C  
ATOM   4249  C   CNT A 208    -112.653  16.906  -3.440  0.00  0.00           C  
ATOM   4250  C   CNT A 208    -113.189  17.578  -2.370  0.00  0.00           C  
ATOM   4251  C   CNT A 208    -113.986  16.886  -1.440  7.00  0.00           C  
ATOM   4252  C   CNT A 208    -114.463  17.652  -0.360  3.00  0.00           C  
ATOM   4253  C   CNT A 208    -113.114  18.956  -2.300  2.00  0.00           C  
ATOM   4254  C   CNT A 208    -114.013  19.666  -1.510  5.00  0.00           C  
ATOM   4255  C   CNT A 208    -114.785  19.031  -0.500  9.00  0.00           C  
ATOM   4256  C   CNT A 208    -115.546  19.942   0.210  3.00  0.00           C  
ATOM   4257  C   CNT A 208    -114.227  21.010  -1.740  4.00  0.00           C  
ATOM   4258  C   CNT A 208    -115.336  21.689  -1.210  8.00  0.00           C  
ATOM   4259  C   CNT A 208    -116.029  21.184  -0.110  7.00  0.00           C  
ATOM   4260  C   CNT A 208    -117.213  21.835   0.200  0.00  0.00           C  
ATOM   4261  C   CNT A 208    -115.727  22.927  -1.730  9.00  0.00           C  
ATOM   4262  C   CNT A 208    -117.031  23.389  -1.510  6.00  0.00           C  
ATOM   4263  C   CNT A 208    -117.828  22.876  -0.470  5.00  0.00           C  
ATOM   4264  C   CNT A 208    -119.108  23.427  -0.380  3.00  0.00           C  
ATOM   4265  C   CNT A 208    -117.549  24.414  -2.350  3.00  0.00           C  
ATOM   4266  C   CNT A 208    -118.936  24.629  -2.380  3.00  0.00           C  
ATOM   4267  C   CNT A 208    -119.808  23.990  -1.450  1.00  0.00           C  
ATOM   4268  C   CNT A 208    -121.147  23.965  -1.860  9.00  0.00           C  
ATOM   4269  C   CNT A 208    -119.456  25.324  -3.520  1.00  0.00           C  
ATOM   4270  C   CNT A 208    -120.794  25.154  -3.920  8.00  0.00           C  
ATOM   4271  C   CNT A 208    -121.715  24.601  -3.020  2.00  0.00           C  
ATOM   4272  C   CNT A 208    -123.041  24.504  -3.530  1.00  0.00           C  
ATOM   4273  C   CNT A 208    -121.203  25.509  -5.230  7.00  0.00           C  
ATOM   4274  C   CNT A 208    -122.511  25.148  -5.730  5.00  0.00           C  
ATOM   4275  C   CNT A 208    -123.481  24.631  -4.870  4.00  0.00           C  
ATOM   4276  C   CNT A 208    -124.670  24.223  -5.450  5.00  0.00           C  
ATOM   4277  C   CNT A 208    -122.761  25.189  -7.190  3.00  0.00           C  
ATOM   4278  C   CNT A 208    -123.859  24.497  -7.710  5.00  0.00           C  
ATOM   4279  C   CNT A 208    -124.746  23.874  -6.830  1.00  0.00           C  
ATOM   4280  C   CNT A 208    -125.602  22.992  -7.480  6.00  0.00           C  
ATOM   4281  C   CNT A 208    -123.806  24.161  -9.060  3.00  0.00           C  
ATOM   4282  C   CNT A 208    -124.756  23.239  -9.680  4.00  0.00           C  
ATOM   4283  C   CNT A 208    -125.755  22.660  -8.850  0.00  0.00           C  
ATOM   4284  C   CNT A 208    -126.537  21.714  -9.530  5.00  0.00           C  
ATOM   4285  C   CNT A 208    -124.463  22.765 -10.940  8.00  0.00           C  
ATOM   4286  C   CNT A 208    -125.130  21.618 -11.450  7.00  0.00           C  
ATOM   4287  C   CNT A 208    -126.092  20.942 -10.630  1.00  0.00           C  
ATOM   4288  C   CNT A 208    -126.436  19.639 -11.000  0.00  0.00           C  
ATOM   4289  C   CNT A 208    -124.789  21.007 -12.620  7.00  0.00           C  
ATOM   4290  C   CNT A 208    -125.094  19.641 -12.900  6.00  0.00           C  
ATOM   4291  C   CNT A 208    -125.986  18.936 -12.110  8.00  0.00           C  
ATOM   4292  C   CNT A 208    -126.153  17.589 -12.390  8.00  0.00           C  
ATOM   4293  C   CNT A 208    -124.216  18.928 -13.720  5.00  0.00           C  
ATOM   4294  C   CNT A 208    -124.162  17.534 -13.700  6.00  0.00           C  
ATOM   4295  C   CNT A 208    -125.188  16.825 -13.100  1.00  0.00           C  
ATOM   4296  C   CNT A 208    -125.010  15.455 -12.930  9.00  0.00           C  
ATOM   4297  C   CNT A 208    -122.989  16.870 -14.050  4.00  0.00           C  
ATOM   4298  C   CNT A 208    -122.777  15.479 -13.740  0.00  0.00           C  
ATOM   4299  C   CNT A 208    -123.829  14.717 -13.170  3.00  0.00           C  
ATOM   4300  C   CNT A 208    -123.417  13.457 -12.820  1.00  0.00           C  
END
