# Supplementary material for: Molecular Dynamics Study of the Interaction of Carbon Nanotubes with Telomeric DNA Fragment Containing Noncanonical G-Quadruplex and i-Motif Forms
Source: Int J Mol Sci. 2020 Mar 11;21(6):1925. doi: 10.3390/ijms21061925 (PMC7139311; doi:10.3390/ijms21061925)
Supplement: Supplementary file 1 [file ijms-21-01925-s001.zip › fig7_n10.pdb]

ATOM      1  C5' DG5 A   1     -49.176  97.821  25.380  6.00  0.00           C  
ATOM      2  O5' DG5 A   1     -50.496  97.276  25.550  6.00  0.00           O  
ATOM      3  C4' DG5 A   1     -48.793  98.157  23.940  6.00  0.00           C  
ATOM      4  O4' DG5 A   1     -47.436  98.451  23.780  7.00  0.00           O  
ATOM      5  C3' DG5 A   1     -49.112  97.266  22.810  5.00  0.00           C  
ATOM      6  O3' DG5 A   1     -49.302  98.051  21.620  9.00  0.00           O  
ATOM      7  C2' DG5 A   1     -47.914  96.341  22.750  3.00  0.00           C  
ATOM      8  C1' DG5 A   1     -46.775  97.358  23.080  3.00  0.00           C  
ATOM      9  N1  DG5 A   1     -42.007  95.855  23.240  7.00  0.00           N  
ATOM     10  C2  DG5 A   1     -42.661  96.596  22.250  2.00  0.00           C  
ATOM     11  N2  DG5 A   1     -42.084  96.819  21.090  6.00  0.00           N  
ATOM     12  N3  DG5 A   1     -43.900  96.967  22.470  3.00  0.00           N  
ATOM     13  C4  DG5 A   1     -44.425  96.592  23.640  7.00  0.00           C  
ATOM     14  C5  DG5 A   1     -43.835  95.890  24.680  8.00  0.00           C  
ATOM     15  C6  DG5 A   1     -42.466  95.480  24.470  9.00  0.00           C  
ATOM     16  O6  DG5 A   1     -41.716  94.822  25.150  8.00  0.00           O  
ATOM     17  N7  DG5 A   1     -44.828  95.636  25.620  3.00  0.00           N  
ATOM     18  C8  DG5 A   1     -45.923  96.177  25.130  6.00  0.00           C  
ATOM     19  N9  DG5 A   1     -45.747  96.789  23.950  4.00  0.00           N  
ATOM     20 HO5' DG5 A   1     -51.133  97.878  25.230  8.00  0.00           H  
ATOM     21  H1  DG5 A   1     -41.033  95.565  23.040  3.00  0.00           H  
ATOM     22  H8  DG5 A   1     -46.789  96.095  25.670  5.00  0.00           H  
ATOM     23  H1' DG5 A   1     -46.357  97.724  22.090  9.00  0.00           H  
ATOM     24  H2' DG5 A   1     -47.900  95.573  23.540  9.00  0.00           H  
ATOM     25  H21 DG5 A   1     -41.226  96.454  20.830  7.00  0.00           H  
ATOM     26  H3' DG5 A   1     -50.008  96.655  22.930  7.00  0.00           H  
ATOM     27  H22 DG5 A   1     -42.616  97.277  20.410  1.00  0.00           H  
ATOM     28  H4' DG5 A   1     -49.235  99.163  23.780  8.00  0.00           H  
ATOM     29  H5' DG5 A   1     -48.666  96.978  25.840  6.00  0.00           H  
ATOM     30 H2'' DG5 A   1     -47.824  95.959  21.760  0.00  0.00           H  
ATOM     31 H5'' DG5 A   1     -49.007  98.623  26.140  9.00  0.00           H  
ATOM     32  P    DG A   2     -49.824  97.469  20.260  2.00  0.00           P  
ATOM     33  C5'  DG A   2     -47.449  97.664  19.030  7.00  0.00           C  
ATOM     34  O5'  DG A   2     -48.472  96.896  19.630  2.00  0.00           O  
ATOM     35  C4'  DG A   2     -46.298  96.864  18.470  4.00  0.00           C  
ATOM     36  O4'  DG A   2     -45.504  96.359  19.560  3.00  0.00           O  
ATOM     37  C3'  DG A   2     -46.681  95.569  17.620  6.00  0.00           C  
ATOM     38  O3'  DG A   2     -45.928  95.686  16.370  3.00  0.00           O  
ATOM     39  C2'  DG A   2     -46.360  94.470  18.620  0.00  0.00           C  
ATOM     40  C1'  DG A   2     -45.073  95.037  19.220  5.00  0.00           C  
ATOM     41  N1   DG A   2     -41.133  92.318  21.360  2.00  0.00           N  
ATOM     42  C2   DG A   2     -41.306  92.813  20.080  6.00  0.00           C  
ATOM     43  N2   DG A   2     -40.361  92.618  19.200  9.00  0.00           N  
ATOM     44  N3   DG A   2     -42.328  93.500  19.600  2.00  0.00           N  
ATOM     45  C4   DG A   2     -43.318  93.625  20.510  5.00  0.00           C  
ATOM     46  C5   DG A   2     -43.377  92.992  21.750  0.00  0.00           C  
ATOM     47  C6   DG A   2     -42.206  92.204  22.220  7.00  0.00           C  
ATOM     48  O6   DG A   2     -42.023  91.814  23.390  7.00  0.00           O  
ATOM     49  N7   DG A   2     -44.529  93.370  22.430  9.00  0.00           N  
ATOM     50  C8   DG A   2     -45.139  94.128  21.570  8.00  0.00           C  
ATOM     51  N9   DG A   2     -44.469  94.338  20.370  5.00  0.00           N  
ATOM     52  OP1  DG A   2     -50.149  98.660  19.470  1.00  0.00           O  
ATOM     53  OP2  DG A   2     -50.792  96.401  20.450  9.00  0.00           O1-
ATOM     54  H1   DG A   2     -40.364  91.678  21.540  9.00  0.00           H  
ATOM     55  H8   DG A   2     -46.096  94.583  21.790  1.00  0.00           H  
ATOM     56  H1'  DG A   2     -44.333  94.980  18.430  3.00  0.00           H  
ATOM     57  H2'  DG A   2     -47.074  94.451  19.470  0.00  0.00           H  
ATOM     58  H21  DG A   2     -39.451  92.151  19.390  3.00  0.00           H  
ATOM     59  H3'  DG A   2     -47.712  95.498  17.370  5.00  0.00           H  
ATOM     60  H22  DG A   2     -40.625  92.874  18.270  6.00  0.00           H  
ATOM     61  H4'  DG A   2     -45.657  97.502  17.830  5.00  0.00           H  
ATOM     62  H5'  DG A   2     -47.096  98.320  19.770  0.00  0.00           H  
ATOM     63 H2''  DG A   2     -46.253  93.477  18.170  3.00  0.00           H  
ATOM     64 H5''  DG A   2     -47.916  98.168  18.200  6.00  0.00           H  
ATOM     65  P    DG A   3     -45.863  94.541  15.320  6.00  0.00           P  
ATOM     66  C5'  DG A   3     -43.311  93.981  15.600  2.00  0.00           C  
ATOM     67  O5'  DG A   3     -44.641  93.634  15.840  4.00  0.00           O  
ATOM     68  C4'  DG A   3     -42.342  92.842  15.200  8.00  0.00           C  
ATOM     69  O4'  DG A   3     -41.757  92.254  16.350  5.00  0.00           O  
ATOM     70  C3'  DG A   3     -42.824  91.607  14.400  0.00  0.00           C  
ATOM     71  O3'  DG A   3     -41.836  91.051  13.460  9.00  0.00           O  
ATOM     72  C2'  DG A   3     -43.279  90.633  15.500  6.00  0.00           C  
ATOM     73  C1'  DG A   3     -42.156  90.898  16.470  4.00  0.00           C  
ATOM     74  N1   DG A   3     -41.166  88.289  20.690  1.00  0.00           N  
ATOM     75  C2   DG A   3     -40.405  88.491  19.550  9.00  0.00           C  
ATOM     76  N2   DG A   3     -39.163  87.936  19.490  8.00  0.00           N  
ATOM     77  N3   DG A   3     -40.746  89.300  18.570  4.00  0.00           N  
ATOM     78  C4   DG A   3     -41.939  89.884  18.730  6.00  0.00           C  
ATOM     79  C5   DG A   3     -42.743  89.761  19.880  2.00  0.00           C  
ATOM     80  C6   DG A   3     -42.335  88.931  21.000  1.00  0.00           C  
ATOM     81  O6   DG A   3     -42.886  88.676  22.040  5.00  0.00           O  
ATOM     82  N7   DG A   3     -43.826  90.560  19.700  1.00  0.00           N  
ATOM     83  C8   DG A   3     -43.812  90.996  18.450  2.00  0.00           C  
ATOM     84  N9   DG A   3     -42.616  90.674  17.820  5.00  0.00           N  
ATOM     85  OP1  DG A   3     -45.427  95.177  13.990  7.00  0.00           O  
ATOM     86  OP2  DG A   3     -47.182  93.847  15.450  1.00  0.00           O1-
ATOM     87  H1   DG A   3     -40.765  87.701  21.370  5.00  0.00           H  
ATOM     88  H8   DG A   3     -44.560  91.738  18.120  7.00  0.00           H  
ATOM     89  H1'  DG A   3     -41.236  90.452  16.070  3.00  0.00           H  
ATOM     90  H2'  DG A   3     -44.272  90.921  15.880  4.00  0.00           H  
ATOM     91  H21  DG A   3     -38.938  87.223  20.200  4.00  0.00           H  
ATOM     92  H3'  DG A   3     -43.639  91.923  13.720  9.00  0.00           H  
ATOM     93  H22  DG A   3     -38.725  87.975  18.610  0.00  0.00           H  
ATOM     94  H4'  DG A   3     -41.562  93.318  14.700  0.00  0.00           H  
ATOM     95  H5'  DG A   3     -42.964  94.352  16.580  3.00  0.00           H  
ATOM     96 H2''  DG A   3     -43.242  89.563  15.110  7.00  0.00           H  
ATOM     97 H5''  DG A   3     -43.270  94.849  14.930  2.00  0.00           H  
ATOM     98  P    DT A   4     -42.064  89.806  12.520  4.00  0.00           P  
ATOM     99  C5'  DT A   4     -39.836  88.755  13.520  6.00  0.00           C  
ATOM    100  O5'  DT A   4     -41.237  88.699  13.240  3.00  0.00           O  
ATOM    101  C4'  DT A   4     -39.316  87.392  14.090  2.00  0.00           C  
ATOM    102  O4'  DT A   4     -39.801  87.391  15.460  1.00  0.00           O  
ATOM    103  C3'  DT A   4     -39.683  86.023  13.440  9.00  0.00           C  
ATOM    104  O3'  DT A   4     -38.461  85.271  13.130  9.00  0.00           O  
ATOM    105  C2'  DT A   4     -40.479  85.359  14.530  0.00  0.00           C  
ATOM    106  C1'  DT A   4     -40.133  86.046  15.850  7.00  0.00           C  
ATOM    107  N1   DT A   4     -41.269  86.075  16.780  1.00  0.00           N  
ATOM    108  C2   DT A   4     -41.183  85.500  18.010  9.00  0.00           C  
ATOM    109  O2   DT A   4     -40.251  84.835  18.450  0.00  0.00           O  
ATOM    110  N3   DT A   4     -42.177  85.720  18.940  4.00  0.00           N  
ATOM    111  C4   DT A   4     -43.282  86.419  18.640  6.00  0.00           C  
ATOM    112  O4   DT A   4     -44.089  86.467  19.540  1.00  0.00           O  
ATOM    113  C5   DT A   4     -43.449  86.918  17.270  9.00  0.00           C  
ATOM    114  C6   DT A   4     -42.438  86.643  16.380  4.00  0.00           C  
ATOM    115  C7   DT A   4     -44.746  87.729  16.890  3.00  0.00           C  
ATOM    116  OP1  DT A   4     -41.427  90.103  11.180  8.00  0.00           O  
ATOM    117  OP2  DT A   4     -43.510  89.450  12.560  5.00  0.00           O1-
ATOM    118  H3   DT A   4     -42.024  85.541  19.870  8.00  0.00           H  
ATOM    119  H6   DT A   4     -42.644  86.978  15.360  3.00  0.00           H  
ATOM    120  H1'  DT A   4     -39.272  85.588  16.240  4.00  0.00           H  
ATOM    121  H2'  DT A   4     -41.484  85.646  14.230  0.00  0.00           H  
ATOM    122  H3'  DT A   4     -40.273  86.178  12.550  0.00  0.00           H  
ATOM    123  H4'  DT A   4     -38.303  87.393  14.130  9.00  0.00           H  
ATOM    124  H5'  DT A   4     -39.630  89.540  14.290  7.00  0.00           H  
ATOM    125  H71  DT A   4     -44.686  88.278  15.940  6.00  0.00           H  
ATOM    126  H72  DT A   4     -45.581  87.072  17.020  1.00  0.00           H  
ATOM    127  H73  DT A   4     -44.951  88.468  17.650  3.00  0.00           H  
ATOM    128 H2''  DT A   4     -40.382  84.246  14.600  0.00  0.00           H  
ATOM    129 H5''  DT A   4     -39.264  88.952  12.600  1.00  0.00           H  
ATOM    130  P    DT A   5     -38.284  83.736  12.720  5.00  0.00           P  
ATOM    131  C5'  DT A   5     -37.261  82.800  14.990  5.00  0.00           C  
ATOM    132  O5'  DT A   5     -38.445  82.919  14.080  4.00  0.00           O  
ATOM    133  C4'  DT A   5     -37.650  81.962  16.210  8.00  0.00           C  
ATOM    134  O4'  DT A   5     -38.821  82.535  16.830  8.00  0.00           O  
ATOM    135  C3'  DT A   5     -37.909  80.391  16.150  9.00  0.00           C  
ATOM    136  O3'  DT A   5     -37.107  79.739  17.150  5.00  0.00           O  
ATOM    137  C2'  DT A   5     -39.399  80.313  16.440  7.00  0.00           C  
ATOM    138  C1'  DT A   5     -39.627  81.539  17.360  6.00  0.00           C  
ATOM    139  N1   DT A   5     -41.014  81.835  17.590  2.00  0.00           N  
ATOM    140  C2   DT A   5     -41.509  81.817  18.870  2.00  0.00           C  
ATOM    141  O2   DT A   5     -40.881  81.274  19.770  8.00  0.00           O  
ATOM    142  N3   DT A   5     -42.699  82.417  19.190  5.00  0.00           N  
ATOM    143  C4   DT A   5     -43.571  82.858  18.210  9.00  0.00           C  
ATOM    144  O4   DT A   5     -44.708  83.295  18.460  8.00  0.00           O  
ATOM    145  C5   DT A   5     -43.047  82.809  16.840  3.00  0.00           C  
ATOM    146  C6   DT A   5     -41.786  82.368  16.560  7.00  0.00           C  
ATOM    147  C7   DT A   5     -43.942  83.342  15.700  9.00  0.00           C  
ATOM    148  OP1  DT A   5     -36.912  83.506  12.170  5.00  0.00           O  
ATOM    149  OP2  DT A   5     -39.491  83.302  11.960  1.00  0.00           O1-
ATOM    150  H3   DT A   5     -43.049  82.180  20.060  8.00  0.00           H  
ATOM    151  H6   DT A   5     -41.407  82.421  15.490  4.00  0.00           H  
ATOM    152  H1'  DT A   5     -39.185  81.248  18.240  6.00  0.00           H  
ATOM    153  H2'  DT A   5     -39.994  80.449  15.510  0.00  0.00           H  
ATOM    154  H3'  DT A   5     -37.768  80.043  15.090  7.00  0.00           H  
ATOM    155  H4'  DT A   5     -36.870  82.125  17.070  0.00  0.00           H  
ATOM    156  H5'  DT A   5     -36.988  83.793  15.420  4.00  0.00           H  
ATOM    157  H71  DT A   5     -43.331  83.603  14.850  0.00  0.00           H  
ATOM    158  H72  DT A   5     -44.776  82.696  15.560  5.00  0.00           H  
ATOM    159  H73  DT A   5     -44.348  84.317  16.090  1.00  0.00           H  
ATOM    160 H2''  DT A   5     -39.638  79.354  16.890  8.00  0.00           H  
ATOM    161 H5''  DT A   5     -36.262  82.463  14.550  6.00  0.00           H  
ATOM    162  P    DA A   6     -36.881  78.230  17.220  3.00  0.00           P  
ATOM    163  C5'  DA A   6     -37.009  77.776  19.850  2.00  0.00           C  
ATOM    164  O5'  DA A   6     -37.580  77.750  18.540  1.00  0.00           O  
ATOM    165  C4'  DA A   6     -37.661  76.871  20.900  9.00  0.00           C  
ATOM    166  O4'  DA A   6     -38.992  77.318  21.190  7.00  0.00           O  
ATOM    167  C3'  DA A   6     -37.766  75.356  20.610  8.00  0.00           C  
ATOM    168  O3'  DA A   6     -37.660  74.912  21.910  6.00  0.00           O  
ATOM    169  C2'  DA A   6     -39.170  75.247  19.930  9.00  0.00           C  
ATOM    170  C1'  DA A   6     -39.928  76.295  20.790  2.00  0.00           C  
ATOM    171  N1   DA A   6     -44.736  78.215  20.730  3.00  0.00           N  
ATOM    172  C2   DA A   6     -44.117  77.508  21.710  3.00  0.00           C  
ATOM    173  N3   DA A   6     -42.852  76.963  21.580  2.00  0.00           N  
ATOM    174  C4   DA A   6     -42.271  77.281  20.370  3.00  0.00           C  
ATOM    175  C5   DA A   6     -42.817  77.987  19.320  3.00  0.00           C  
ATOM    176  C6   DA A   6     -44.142  78.477  19.590  4.00  0.00           C  
ATOM    177  N6   DA A   6     -44.886  79.170  18.820  3.00  0.00           N  
ATOM    178  N7   DA A   6     -41.915  78.103  18.240  9.00  0.00           N  
ATOM    179  C8   DA A   6     -40.821  77.483  18.660  3.00  0.00           C  
ATOM    180  N9   DA A   6     -40.976  76.981  19.940  3.00  0.00           N  
ATOM    181  OP1  DA A   6     -35.398  78.012  17.300  6.00  0.00           O  
ATOM    182  OP2  DA A   6     -37.642  77.579  16.070  8.00  0.00           O1-
ATOM    183  H2   DA A   6     -44.579  77.241  22.650  2.00  0.00           H  
ATOM    184  H8   DA A   6     -39.915  77.401  18.060  3.00  0.00           H  
ATOM    185  H1'  DA A   6     -40.399  75.761  21.560  4.00  0.00           H  
ATOM    186  H2'  DA A   6     -39.074  75.508  18.950  6.00  0.00           H  
ATOM    187  H3'  DA A   6     -36.984  74.993  19.920  1.00  0.00           H  
ATOM    188  H4'  DA A   6     -37.019  77.075  21.760  7.00  0.00           H  
ATOM    189  H5'  DA A   6     -37.035  78.764  20.200  9.00  0.00           H  
ATOM    190  H61  DA A   6     -45.722  79.587  19.190  9.00  0.00           H  
ATOM    191  H62  DA A   6     -44.555  79.400  17.920  1.00  0.00           H  
ATOM    192 H2''  DA A   6     -39.508  74.221  20.110  8.00  0.00           H  
ATOM    193 H5''  DA A   6     -35.960  77.616  19.840  7.00  0.00           H  
ATOM    194  P    DG A   7     -37.466  73.427  22.290  8.00  0.00           P  
ATOM    195  C5'  DG A   7     -39.586  73.271  23.710  5.00  0.00           C  
ATOM    196  O5'  DG A   7     -38.921  72.971  22.490  4.00  0.00           O  
ATOM    197  C4'  DG A   7     -41.032  72.764  23.510  7.00  0.00           C  
ATOM    198  O4'  DG A   7     -41.679  73.597  22.580  3.00  0.00           O  
ATOM    199  C3'  DG A   7     -41.192  71.341  23.010  7.00  0.00           C  
ATOM    200  O3'  DG A   7     -42.192  70.582  23.640  8.00  0.00           O  
ATOM    201  C2'  DG A   7     -41.595  71.505  21.560  4.00  0.00           C  
ATOM    202  C1'  DG A   7     -42.466  72.755  21.740  8.00  0.00           C  
ATOM    203  N1   DG A   7     -46.024  75.722  19.740  1.00  0.00           N  
ATOM    204  C2   DG A   7     -46.015  75.082  20.930  8.00  0.00           C  
ATOM    205  N2   DG A   7     -46.811  75.591  21.830  6.00  0.00           N  
ATOM    206  N3   DG A   7     -44.989  74.290  21.310  3.00  0.00           N  
ATOM    207  C4   DG A   7     -43.996  74.208  20.350  8.00  0.00           C  
ATOM    208  C5   DG A   7     -43.977  74.777  19.080  9.00  0.00           C  
ATOM    209  C6   DG A   7     -45.075  75.613  18.700  5.00  0.00           C  
ATOM    210  O6   DG A   7     -45.250  76.290  17.670  9.00  0.00           O  
ATOM    211  N7   DG A   7     -42.760  74.346  18.490  1.00  0.00           N  
ATOM    212  C8   DG A   7     -42.080  73.652  19.380  8.00  0.00           C  
ATOM    213  N9   DG A   7     -42.851  73.485  20.540  1.00  0.00           N  
ATOM    214  OP1  DG A   7     -36.691  73.250  23.600  3.00  0.00           O  
ATOM    215  OP2  DG A   7     -36.834  72.650  21.200  7.00  0.00           O1-
ATOM    216  H1   DG A   7     -46.836  76.276  19.550  2.00  0.00           H  
ATOM    217  H8   DG A   7     -41.057  73.270  19.200  5.00  0.00           H  
ATOM    218  H1'  DG A   7     -43.409  72.508  22.230  0.00  0.00           H  
ATOM    219  H2'  DG A   7     -40.756  71.809  20.880  3.00  0.00           H  
ATOM    220  H21  DG A   7     -47.561  76.227  21.600  5.00  0.00           H  
ATOM    221  H3'  DG A   7     -40.183  70.871  23.140  6.00  0.00           H  
ATOM    222  H22  DG A   7     -46.719  75.297  22.810  6.00  0.00           H  
ATOM    223  H4'  DG A   7     -41.714  72.807  24.430  8.00  0.00           H  
ATOM    224  H5'  DG A   7     -39.745  74.325  23.720  7.00  0.00           H  
ATOM    225 H2''  DG A   7     -41.985  70.616  21.090  6.00  0.00           H  
ATOM    226 H5''  DG A   7     -39.205  72.830  24.640  7.00  0.00           H  
ATOM    227  P    DG A   8     -42.369  69.021  23.590  0.00  0.00           P  
ATOM    228  C5'  DG A   8     -44.594  68.671  22.100  4.00  0.00           C  
ATOM    229  O5'  DG A   8     -43.173  68.684  22.260  8.00  0.00           O  
ATOM    230  C4'  DG A   8     -45.222  69.983  22.680  3.00  0.00           C  
ATOM    231  O4'  DG A   8     -45.047  71.085  21.740  7.00  0.00           O  
ATOM    232  C3'  DG A   8     -46.748  69.768  22.780  8.00  0.00           C  
ATOM    233  O3'  DG A   8     -47.267  70.692  23.630  9.00  0.00           O  
ATOM    234  C2'  DG A   8     -47.133  70.096  21.390  7.00  0.00           C  
ATOM    235  C1'  DG A   8     -46.283  71.283  21.110  7.00  0.00           C  
ATOM    236  N1   DG A   8     -47.936  74.040  17.140  1.00  0.00           N  
ATOM    237  C2   DG A   8     -48.474  73.891  18.410  9.00  0.00           C  
ATOM    238  N2   DG A   8     -49.540  74.531  18.750  8.00  0.00           N  
ATOM    239  N3   DG A   8     -48.032  73.096  19.410  2.00  0.00           N  
ATOM    240  C4   DG A   8     -46.919  72.406  18.950  3.00  0.00           C  
ATOM    241  C5   DG A   8     -46.376  72.415  17.680  8.00  0.00           C  
ATOM    242  C6   DG A   8     -46.923  73.276  16.720  4.00  0.00           C  
ATOM    243  O6   DG A   8     -46.489  73.534  15.550  9.00  0.00           O  
ATOM    244  N7   DG A   8     -45.288  71.592  17.630  0.00  0.00           N  
ATOM    245  C8   DG A   8     -45.159  71.140  18.830  0.00  0.00           C  
ATOM    246  N9   DG A   8     -46.153  71.537  19.650  1.00  0.00           N  
ATOM    247  OP1  DG A   8     -43.201  68.565  24.710  3.00  0.00           O  
ATOM    248  OP2  DG A   8     -41.043  68.383  23.310  5.00  0.00           O1-
ATOM    249  H1   DG A   8     -48.283  74.701  16.500  5.00  0.00           H  
ATOM    250  H8   DG A   8     -44.486  70.309  19.120  0.00  0.00           H  
ATOM    251  H1'  DG A   8     -46.831  72.108  21.560  4.00  0.00           H  
ATOM    252  H2'  DG A   8     -46.842  69.274  20.720  7.00  0.00           H  
ATOM    253  H21  DG A   8     -50.055  75.093  18.060  8.00  0.00           H  
ATOM    254  H3'  DG A   8     -46.934  68.693  23.030  7.00  0.00           H  
ATOM    255  H22  DG A   8     -49.950  74.363  19.670  7.00  0.00           H  
ATOM    256  H4'  DG A   8     -44.823  70.169  23.630  3.00  0.00           H  
ATOM    257  H5'  DG A   8     -45.037  67.910  22.730  3.00  0.00           H  
ATOM    258 H2''  DG A   8     -48.224  70.174  21.200  2.00  0.00           H  
ATOM    259 H5''  DG A   8     -44.894  68.654  21.020  3.00  0.00           H  
ATOM    260  P    DG A   9     -48.602  70.499  24.450  0.00  0.00           P  
ATOM    261  C5'  DG A   9     -50.779  70.322  22.870  2.00  0.00           C  
ATOM    262  O5'  DG A   9     -49.686  71.083  23.400  8.00  0.00           O  
ATOM    263  C4'  DG A   9     -51.774  71.219  22.070  3.00  0.00           C  
ATOM    264  O4'  DG A   9     -51.117  71.764  20.940  0.00  0.00           O  
ATOM    265  C3'  DG A   9     -53.017  70.472  21.500  2.00  0.00           C  
ATOM    266  O3'  DG A   9     -54.202  71.223  21.650  8.00  0.00           O  
ATOM    267  C2'  DG A   9     -52.605  70.097  20.110  6.00  0.00           C  
ATOM    268  C1'  DG A   9     -51.800  71.424  19.750  1.00  0.00           C  
ATOM    269  N1   DG A   9     -50.801  72.934  15.000  7.00  0.00           N  
ATOM    270  C2   DG A   9     -51.881  73.126  15.770  9.00  0.00           C  
ATOM    271  N2   DG A   9     -52.797  73.886  15.260  8.00  0.00           N  
ATOM    272  N3   DG A   9     -52.078  72.720  16.980  3.00  0.00           N  
ATOM    273  C4   DG A   9     -51.079  71.845  17.370  9.00  0.00           C  
ATOM    274  C5   DG A   9     -50.084  71.323  16.530  1.00  0.00           C  
ATOM    275  C6   DG A   9     -49.851  71.949  15.260  1.00  0.00           C  
ATOM    276  O6   DG A   9     -48.984  71.876  14.440  5.00  0.00           O  
ATOM    277  N7   DG A   9     -49.384  70.372  17.270  1.00  0.00           N  
ATOM    278  C8   DG A   9     -49.889  70.391  18.450  5.00  0.00           C  
ATOM    279  N9   DG A   9     -50.930  71.254  18.590  0.00  0.00           N  
ATOM    280  OP1  DG A   9     -48.439  71.462  25.560  2.00  0.00           O  
ATOM    281  OP2  DG A   9     -48.864  69.080  24.810  9.00  0.00           O1-
ATOM    282  H1   DG A   9     -50.757  73.221  14.050  5.00  0.00           H  
ATOM    283  H8   DG A   9     -49.491  69.799  19.220  9.00  0.00           H  
ATOM    284  H1'  DG A   9     -52.502  72.187  19.530  6.00  0.00           H  
ATOM    285  H2'  DG A   9     -51.872  69.286  20.150  6.00  0.00           H  
ATOM    286  H21  DG A   9     -52.812  74.037  14.270  1.00  0.00           H  
ATOM    287  H3'  DG A   9     -53.169  69.612  22.060  9.00  0.00           H  
ATOM    288  H22  DG A   9     -53.571  74.089  15.870  6.00  0.00           H  
ATOM    289  H4'  DG A   9     -52.115  71.997  22.730  7.00  0.00           H  
ATOM    290  H5'  DG A   9     -51.392  69.766  23.620  1.00  0.00           H  
ATOM    291 H2''  DG A   9     -53.407  69.717  19.480  6.00  0.00           H  
ATOM    292 H5''  DG A   9     -50.440  69.603  22.160  2.00  0.00           H  
ATOM    293  P    DT A  10     -55.662  70.740  21.220  1.00  0.00           P  
ATOM    294  C5'  DT A  10     -56.040  72.811  19.670  4.00  0.00           C  
ATOM    295  O5'  DT A  10     -55.843  71.385  19.760  8.00  0.00           O  
ATOM    296  C4'  DT A  10     -56.516  73.239  18.310  8.00  0.00           C  
ATOM    297  O4'  DT A  10     -55.497  72.901  17.350  5.00  0.00           O  
ATOM    298  C3'  DT A  10     -57.787  72.553  17.830  7.00  0.00           C  
ATOM    299  O3'  DT A  10     -58.674  73.491  17.390  9.00  0.00           O  
ATOM    300  C2'  DT A  10     -57.329  71.533  16.820  0.00  0.00           C  
ATOM    301  C1'  DT A  10     -56.035  72.193  16.310  3.00  0.00           C  
ATOM    302  N1   DT A  10     -55.050  71.178  15.720  0.00  0.00           N  
ATOM    303  C2   DT A  10     -54.560  71.453  14.470  1.00  0.00           C  
ATOM    304  O2   DT A  10     -55.064  72.288  13.740  7.00  0.00           O  
ATOM    305  N3   DT A  10     -53.488  70.685  14.060  4.00  0.00           N  
ATOM    306  C4   DT A  10     -52.900  69.715  14.730  6.00  0.00           C  
ATOM    307  O4   DT A  10     -52.048  69.059  14.080  4.00  0.00           O  
ATOM    308  C5   DT A  10     -53.442  69.503  16.120  7.00  0.00           C  
ATOM    309  C6   DT A  10     -54.499  70.211  16.560  1.00  0.00           C  
ATOM    310  C7   DT A  10     -52.942  68.285  16.880  2.00  0.00           C  
ATOM    311  OP1  DT A  10     -56.671  71.314  22.130  9.00  0.00           O  
ATOM    312  OP2  DT A  10     -55.626  69.304  20.940  4.00  0.00           O1-
ATOM    313  H3   DT A  10     -53.167  70.916  13.090  5.00  0.00           H  
ATOM    314  H6   DT A  10     -54.995  69.920  17.460  4.00  0.00           H  
ATOM    315  H1'  DT A  10     -56.454  72.867  15.540  8.00  0.00           H  
ATOM    316  H2'  DT A  10     -57.144  70.576  17.300  7.00  0.00           H  
ATOM    317  H3'  DT A  10     -58.170  71.957  18.680  4.00  0.00           H  
ATOM    318  H4'  DT A  10     -56.751  74.379  18.320  8.00  0.00           H  
ATOM    319  H5'  DT A  10     -55.178  73.295  19.950  1.00  0.00           H  
ATOM    320  H71  DT A  10     -53.754  67.893  17.550  8.00  0.00           H  
ATOM    321  H72  DT A  10     -52.409  67.520  16.240  4.00  0.00           H  
ATOM    322  H73  DT A  10     -52.105  68.677  17.500  0.00  0.00           H  
ATOM    323 H2''  DT A  10     -58.118  71.314  16.180  0.00  0.00           H  
ATOM    324 H5''  DT A  10     -56.858  73.093  20.440  3.00  0.00           H  
ATOM    325  P    DT A  11     -60.196  73.194  17.170  2.00  0.00           P  
ATOM    326  C5'  DT A  11     -60.500  73.755  14.630  2.00  0.00           C  
ATOM    327  O5'  DT A  11     -60.089  72.874  15.600  3.00  0.00           O  
ATOM    328  C4'  DT A  11     -60.022  73.422  13.200  1.00  0.00           C  
ATOM    329  O4'  DT A  11     -58.602  73.271  13.150  0.00  0.00           O  
ATOM    330  C3'  DT A  11     -60.602  72.264  12.560  6.00  0.00           C  
ATOM    331  O3'  DT A  11     -61.925  72.602  12.110  1.00  0.00           O  
ATOM    332  C2'  DT A  11     -59.658  72.077  11.400  9.00  0.00           C  
ATOM    333  C1'  DT A  11     -58.257  72.579  11.960  7.00  0.00           C  
ATOM    334  N1   DT A  11     -57.403  71.383  12.250  9.00  0.00           N  
ATOM    335  C2   DT A  11     -56.574  70.957  11.160  6.00  0.00           C  
ATOM    336  O2   DT A  11     -56.580  71.509  10.070  7.00  0.00           O  
ATOM    337  N3   DT A  11     -55.809  69.880  11.510  1.00  0.00           N  
ATOM    338  C4   DT A  11     -55.863  69.019  12.620  6.00  0.00           C  
ATOM    339  O4   DT A  11     -55.181  67.984  12.650  4.00  0.00           O  
ATOM    340  C5   DT A  11     -56.987  69.381  13.600  6.00  0.00           C  
ATOM    341  C6   DT A  11     -57.656  70.531  13.380  2.00  0.00           C  
ATOM    342  C7   DT A  11     -57.300  68.506  14.790  7.00  0.00           C  
ATOM    343  OP1  DT A  11     -61.029  74.373  17.390  9.00  0.00           O  
ATOM    344  OP2  DT A  11     -60.458  71.913  17.810  8.00  0.00           O1-
ATOM    345  H3   DT A  11     -55.172  69.595  10.780  3.00  0.00           H  
ATOM    346  H6   DT A  11     -58.423  70.792  14.100  9.00  0.00           H  
ATOM    347  H1'  DT A  11     -57.779  73.281  11.330  2.00  0.00           H  
ATOM    348  H2'  DT A  11     -59.838  71.077  11.050  4.00  0.00           H  
ATOM    349  H3'  DT A  11     -60.588  71.333  13.210  2.00  0.00           H  
ATOM    350  H4'  DT A  11     -60.197  74.216  12.520  8.00  0.00           H  
ATOM    351  H5'  DT A  11     -60.061  74.757  14.840  3.00  0.00           H  
ATOM    352  H71  DT A  11     -57.116  67.446  14.560  7.00  0.00           H  
ATOM    353  H72  DT A  11     -56.499  68.675  15.510  2.00  0.00           H  
ATOM    354  H73  DT A  11     -58.288  68.520  15.220  3.00  0.00           H  
ATOM    355 H2''  DT A  11     -60.046  72.664  10.590  1.00  0.00           H  
ATOM    356 H5''  DT A  11     -61.591  73.819  14.700  0.00  0.00           H  
ATOM    357  P    DA A  12     -63.004  71.529  11.860  8.00  0.00           P  
ATOM    358  C5'  DA A  12     -62.884  71.587   9.150  5.00  0.00           C  
ATOM    359  O5'  DA A  12     -62.662  70.894  10.400  1.00  0.00           O  
ATOM    360  C4'  DA A  12     -62.116  71.138   7.900  5.00  0.00           C  
ATOM    361  O4'  DA A  12     -60.839  70.721   8.290  6.00  0.00           O  
ATOM    362  C3'  DA A  12     -62.801  69.844   7.480  0.00  0.00           C  
ATOM    363  O3'  DA A  12     -62.990  69.665   6.050  8.00  0.00           O  
ATOM    364  C2'  DA A  12     -61.992  68.716   8.130  9.00  0.00           C  
ATOM    365  C1'  DA A  12     -60.643  69.362   7.920  3.00  0.00           C  
ATOM    366  N1   DA A  12     -55.976  67.443   8.140  8.00  0.00           N  
ATOM    367  C2   DA A  12     -56.601  68.083   7.140  4.00  0.00           C  
ATOM    368  N3   DA A  12     -57.831  68.561   7.140  8.00  0.00           N  
ATOM    369  C4   DA A  12     -58.387  68.358   8.430  1.00  0.00           C  
ATOM    370  C5   DA A  12     -57.883  67.697   9.530  5.00  0.00           C  
ATOM    371  C6   DA A  12     -56.584  67.207   9.320  8.00  0.00           C  
ATOM    372  N6   DA A  12     -55.847  66.550  10.150  9.00  0.00           N  
ATOM    373  N7   DA A  12     -58.840  67.483  10.510  9.00  0.00           N  
ATOM    374  C8   DA A  12     -59.838  68.075  10.020  1.00  0.00           C  
ATOM    375  N9   DA A  12     -59.674  68.652   8.830  4.00  0.00           N  
ATOM    376  OP1  DA A  12     -64.371  72.141  11.760  5.00  0.00           O  
ATOM    377  OP2  DA A  12     -62.781  70.451  12.870  8.00  0.00           O1-
ATOM    378  H2   DA A  12     -56.033  68.173   6.190  8.00  0.00           H  
ATOM    379  H8   DA A  12     -60.782  68.303  10.560  3.00  0.00           H  
ATOM    380  H1'  DA A  12     -60.437  69.218   6.900  2.00  0.00           H  
ATOM    381  H2'  DA A  12     -62.294  68.748   9.140  9.00  0.00           H  
ATOM    382  H3'  DA A  12     -63.757  69.793   7.960  8.00  0.00           H  
ATOM    383  H4'  DA A  12     -62.243  71.859   7.070  2.00  0.00           H  
ATOM    384  H5'  DA A  12     -62.693  72.620   9.310  8.00  0.00           H  
ATOM    385  H61  DA A  12     -54.864  66.337   9.910  5.00  0.00           H  
ATOM    386  H62  DA A  12     -56.195  66.290  11.060  7.00  0.00           H  
ATOM    387 H2''  DA A  12     -62.170  67.703   7.810  9.00  0.00           H  
ATOM    388 H5''  DA A  12     -63.947  71.572   8.910  9.00  0.00           H  
ATOM    389  P    DG A  13     -64.195  68.836   5.470  4.00  0.00           P  
ATOM    390  C5'  DG A  13     -62.219  66.968   5.120  9.00  0.00           C  
ATOM    391  O5'  DG A  13     -63.529  67.309   5.560  3.00  0.00           O  
ATOM    392  C4'  DG A  13     -61.873  67.150   3.670  1.00  0.00           C  
ATOM    393  O4'  DG A  13     -60.512  66.756   3.420  9.00  0.00           O  
ATOM    394  C3'  DG A  13     -62.620  66.162   2.760  2.00  0.00           C  
ATOM    395  O3'  DG A  13     -63.916  66.591   2.420  0.00  0.00           O  
ATOM    396  C2'  DG A  13     -61.723  66.279   1.500  7.00  0.00           C  
ATOM    397  C1'  DG A  13     -60.270  66.359   2.080  0.00  0.00           C  
ATOM    398  N1   DG A  13     -57.885  62.766  -0.800  3.00  0.00           N  
ATOM    399  C2   DG A  13     -58.391  63.993  -1.160  1.00  0.00           C  
ATOM    400  N2   DG A  13     -58.285  64.311  -2.420  7.00  0.00           N  
ATOM    401  N3   DG A  13     -59.043  64.860  -0.280  1.00  0.00           N  
ATOM    402  C4   DG A  13     -59.052  64.306   0.950  4.00  0.00           C  
ATOM    403  C5   DG A  13     -58.474  63.116   1.350  7.00  0.00           C  
ATOM    404  C6   DG A  13     -57.842  62.254   0.430  8.00  0.00           C  
ATOM    405  O6   DG A  13     -57.316  61.198   0.560  4.00  0.00           O  
ATOM    406  N7   DG A  13     -58.912  62.902   2.680  4.00  0.00           N  
ATOM    407  C8   DG A  13     -59.529  63.998   2.990  5.00  0.00           C  
ATOM    408  N9   DG A  13     -59.653  64.915   2.010  4.00  0.00           N  
ATOM    409  OP1  DG A  13     -64.505  69.124   4.060  2.00  0.00           O  
ATOM    410  OP2  DG A  13     -65.266  68.709   6.490  4.00  0.00           O1-
ATOM    411  H1   DG A  13     -57.450  62.248  -1.490  9.00  0.00           H  
ATOM    412  H8   DG A  13     -59.994  64.150   4.010  4.00  0.00           H  
ATOM    413  H1'  DG A  13     -59.643  67.036   1.540  5.00  0.00           H  
ATOM    414  H2'  DG A  13     -61.883  65.475   0.850  3.00  0.00           H  
ATOM    415  H21  DG A  13     -57.561  63.864  -2.960  5.00  0.00           H  
ATOM    416  H3'  DG A  13     -62.547  65.163   3.090  2.00  0.00           H  
ATOM    417  H22  DG A  13     -58.755  65.230  -2.600  9.00  0.00           H  
ATOM    418  H4'  DG A  13     -61.949  68.184   3.380  3.00  0.00           H  
ATOM    419  H5'  DG A  13     -62.006  65.959   5.450  2.00  0.00           H  
ATOM    420 H2''  DG A  13     -61.972  67.224   1.060  7.00  0.00           H  
ATOM    421 H5''  DG A  13     -61.492  67.500   5.730  2.00  0.00           H  
ATOM    422  P    DG A  14     -65.004  65.594   1.930  9.00  0.00           P  
ATOM    423  C5'  DG A  14     -65.208  65.410  -0.710  3.00  0.00           C  
ATOM    424  O5'  DG A  14     -64.395  65.217   0.530  1.00  0.00           O  
ATOM    425  C4'  DG A  14     -64.301  65.468  -1.990  9.00  0.00           C  
ATOM    426  O4'  DG A  14     -63.687  64.227  -2.280  4.00  0.00           O  
ATOM    427  C3'  DG A  14     -63.302  66.671  -1.980  0.00  0.00           C  
ATOM    428  O3'  DG A  14     -63.353  67.743  -2.980  4.00  0.00           O  
ATOM    429  C2'  DG A  14     -62.144  65.921  -2.490  6.00  0.00           C  
ATOM    430  C1'  DG A  14     -62.304  64.456  -2.040  1.00  0.00           C  
ATOM    431  N1   DG A  14     -59.872  60.050  -1.480  7.00  0.00           N  
ATOM    432  C2   DG A  14     -60.665  60.711  -0.640  9.00  0.00           C  
ATOM    433  N2   DG A  14     -60.765  60.285   0.540  0.00  0.00           N  
ATOM    434  N3   DG A  14     -61.349  61.814  -0.950  6.00  0.00           N  
ATOM    435  C4   DG A  14     -61.103  62.252  -2.180  0.00  0.00           C  
ATOM    436  C5   DG A  14     -60.198  61.712  -3.100  0.00  0.00           C  
ATOM    437  C6   DG A  14     -59.589  60.507  -2.800  8.00  0.00           C  
ATOM    438  O6   DG A  14     -58.802  59.802  -3.520  7.00  0.00           O  
ATOM    439  N7   DG A  14     -60.096  62.496  -4.250  1.00  0.00           N  
ATOM    440  C8   DG A  14     -60.857  63.504  -3.990  1.00  0.00           C  
ATOM    441  N9   DG A  14     -61.510  63.397  -2.790  0.00  0.00           N  
ATOM    442  OP1  DG A  14     -66.273  66.344   1.770  9.00  0.00           O  
ATOM    443  OP2  DG A  14     -64.814  64.408   2.800  1.00  0.00           O1-
ATOM    444  H1   DG A  14     -59.261  59.361  -1.120  3.00  0.00           H  
ATOM    445  H8   DG A  14     -60.919  64.315  -4.720  9.00  0.00           H  
ATOM    446  H1'  DG A  14     -62.059  64.364  -0.930  9.00  0.00           H  
ATOM    447  H2'  DG A  14     -62.139  65.887  -3.600  2.00  0.00           H  
ATOM    448  H21  DG A  14     -60.197  59.514   0.760  9.00  0.00           H  
ATOM    449  H3'  DG A  14     -63.111  67.091  -0.990  4.00  0.00           H  
ATOM    450  H22  DG A  14     -61.466  60.591   1.140  4.00  0.00           H  
ATOM    451  H4'  DG A  14     -64.949  65.632  -2.830  2.00  0.00           H  
ATOM    452  H5'  DG A  14     -65.735  66.365  -0.570  5.00  0.00           H  
ATOM    453 H2''  DG A  14     -61.184  66.274  -2.030  0.00  0.00           H  
ATOM    454 H5''  DG A  14     -65.976  64.648  -0.720  8.00  0.00           H  
ATOM    455  P    DG A  15     -64.648  68.285  -3.650  0.00  0.00           P  
ATOM    456  C5'  DG A  15     -64.372  66.847  -5.830  2.00  0.00           C  
ATOM    457  O5'  DG A  15     -65.033  67.083  -4.610  7.00  0.00           O  
ATOM    458  C4'  DG A  15     -64.546  65.497  -6.600  9.00  0.00           C  
ATOM    459  O4'  DG A  15     -63.613  64.489  -6.240  8.00  0.00           O  
ATOM    460  C3'  DG A  15     -65.888  64.825  -6.470  7.00  0.00           C  
ATOM    461  O3'  DG A  15     -66.372  64.322  -7.700  0.00  0.00           O  
ATOM    462  C2'  DG A  15     -65.591  63.573  -5.580  3.00  0.00           C  
ATOM    463  C1'  DG A  15     -64.273  63.180  -6.250  0.00  0.00           C  
ATOM    464  N1   DG A  15     -60.359  59.972  -6.580  3.00  0.00           N  
ATOM    465  C2   DG A  15     -60.719  61.074  -7.310  4.00  0.00           C  
ATOM    466  N2   DG A  15     -59.945  61.282  -8.350  0.00  0.00           N  
ATOM    467  N3   DG A  15     -61.779  61.908  -7.170  2.00  0.00           N  
ATOM    468  C4   DG A  15     -62.430  61.521  -6.030  2.00  0.00           C  
ATOM    469  C5   DG A  15     -62.261  60.428  -5.210  5.00  0.00           C  
ATOM    470  C6   DG A  15     -61.124  59.612  -5.520  8.00  0.00           C  
ATOM    471  O6   DG A  15     -60.805  58.529  -4.980  4.00  0.00           O  
ATOM    472  N7   DG A  15     -63.138  60.460  -4.140  3.00  0.00           N  
ATOM    473  C8   DG A  15     -63.805  61.584  -4.330  2.00  0.00           C  
ATOM    474  N9   DG A  15     -63.547  62.135  -5.540  5.00  0.00           N  
ATOM    475  OP1  DG A  15     -64.251  69.393  -4.560  0.00  0.00           O  
ATOM    476  OP2  DG A  15     -65.605  68.565  -2.530  5.00  0.00           O1-
ATOM    477  H1   DG A  15     -59.505  59.463  -6.630  9.00  0.00           H  
ATOM    478  H8   DG A  15     -64.524  61.892  -3.640  2.00  0.00           H  
ATOM    479  H1'  DG A  15     -64.447  62.853  -7.330  9.00  0.00           H  
ATOM    480  H2'  DG A  15     -65.582  63.862  -4.550  6.00  0.00           H  
ATOM    481  H21  DG A  15     -59.064  60.729  -8.520  0.00  0.00           H  
ATOM    482  H3'  DG A  15     -66.611  65.497  -6.070  9.00  0.00           H  
ATOM    483  H22  DG A  15     -60.169  62.103  -8.970  6.00  0.00           H  
ATOM    484  H4'  DG A  15     -64.441  65.722  -7.620  2.00  0.00           H  
ATOM    485  H5'  DG A  15     -63.304  66.974  -5.650  9.00  0.00           H  
ATOM    486 H2''  DG A  15     -66.285  62.799  -5.750  3.00  0.00           H  
ATOM    487 H5''  DG A  15     -64.740  67.633  -6.510  0.00  0.00           H  
ATOM    488  P    DT A  16     -67.977  64.240  -8.040  3.00  0.00           P  
ATOM    489  C5'  DT A  16     -67.714  62.143  -9.520  4.00  0.00           C  
ATOM    490  O5'  DT A  16     -68.122  63.515  -9.400  2.00  0.00           O  
ATOM    491  C4'  DT A  16     -67.690  61.750 -11.050  8.00  0.00           C  
ATOM    492  O4'  DT A  16     -69.114  61.688 -11.500  7.00  0.00           O  
ATOM    493  C3'  DT A  16     -66.904  62.829 -11.810  0.00  0.00           C  
ATOM    494  O3'  DT A  16     -66.142  62.247 -12.910  5.00  0.00           O  
ATOM    495  C2'  DT A  16     -68.037  63.692 -12.250  6.00  0.00           C  
ATOM    496  C1'  DT A  16     -69.277  62.831 -12.330  7.00  0.00           C  
ATOM    497  N1   DT A  16     -70.578  63.533 -12.210  3.00  0.00           N  
ATOM    498  C2   DT A  16     -71.418  63.691 -13.360  1.00  0.00           C  
ATOM    499  O2   DT A  16     -71.120  63.263 -14.440  9.00  0.00           O  
ATOM    500  N3   DT A  16     -72.609  64.361 -13.160  7.00  0.00           N  
ATOM    501  C4   DT A  16     -73.138  64.649 -11.930  6.00  0.00           C  
ATOM    502  O4   DT A  16     -74.208  65.227 -11.960  0.00  0.00           O  
ATOM    503  C5   DT A  16     -72.202  64.537 -10.770  1.00  0.00           C  
ATOM    504  C6   DT A  16     -71.026  63.939 -10.970  6.00  0.00           C  
ATOM    505  C7   DT A  16     -72.659  64.865  -9.350  1.00  0.00           C  
ATOM    506  OP1  DT A  16     -68.494  65.586  -8.350  4.00  0.00           O  
ATOM    507  OP2  DT A  16     -68.525  63.371  -6.980  3.00  0.00           O1-
ATOM    508  H3   DT A  16     -73.116  64.573 -13.950  3.00  0.00           H  
ATOM    509  H6   DT A  16     -70.363  63.785 -10.150  5.00  0.00           H  
ATOM    510  H1'  DT A  16     -69.174  62.349 -13.330  6.00  0.00           H  
ATOM    511  H2'  DT A  16     -68.256  64.540 -11.630  5.00  0.00           H  
ATOM    512  H3'  DT A  16     -66.171  63.273 -11.150  1.00  0.00           H  
ATOM    513  H4'  DT A  16     -67.174  60.816 -11.300  4.00  0.00           H  
ATOM    514  H5'  DT A  16     -68.545  61.540  -9.140  3.00  0.00           H  
ATOM    515  H71  DT A  16     -72.607  65.845  -9.130  8.00  0.00           H  
ATOM    516  H72  DT A  16     -73.614  64.493  -9.130  0.00  0.00           H  
ATOM    517  H73  DT A  16     -72.015  64.374  -8.630  1.00  0.00           H  
ATOM    518 H2''  DT A  16     -67.900  63.934 -13.310  5.00  0.00           H  
ATOM    519 H5''  DT A  16     -66.837  61.966  -8.910  8.00  0.00           H  
ATOM    520  P    DT A  17     -64.561  62.247 -12.990  4.00  0.00           P  
ATOM    521  C5'  DT A  17     -62.673  60.780 -12.040  5.00  0.00           C  
ATOM    522  O5'  DT A  17     -64.054  61.066 -12.060  9.00  0.00           O  
ATOM    523  C4'  DT A  17     -62.113  59.684 -11.120  5.00  0.00           C  
ATOM    524  O4'  DT A  17     -62.521  59.774  -9.700  2.00  0.00           O  
ATOM    525  C3'  DT A  17     -62.605  58.310 -11.630  4.00  0.00           C  
ATOM    526  O3'  DT A  17     -61.616  57.336 -11.640  0.00  0.00           O  
ATOM    527  C2'  DT A  17     -63.416  57.786 -10.400  3.00  0.00           C  
ATOM    528  C1'  DT A  17     -62.587  58.470  -9.190  2.00  0.00           C  
ATOM    529  N1   DT A  17     -63.340  58.274  -7.880  1.00  0.00           N  
ATOM    530  C2   DT A  17     -63.032  57.165  -7.070  1.00  0.00           C  
ATOM    531  O2   DT A  17     -62.267  56.262  -7.490  6.00  0.00           O  
ATOM    532  N3   DT A  17     -63.654  57.011  -5.860  1.00  0.00           N  
ATOM    533  C4   DT A  17     -64.633  57.887  -5.390  4.00  0.00           C  
ATOM    534  O4   DT A  17     -65.139  57.756  -4.310  0.00  0.00           O  
ATOM    535  C5   DT A  17     -65.136  58.823  -6.350  7.00  0.00           C  
ATOM    536  C6   DT A  17     -64.411  59.051  -7.530  2.00  0.00           C  
ATOM    537  C7   DT A  17     -66.411  59.580  -6.090  7.00  0.00           C  
ATOM    538  OP1  DT A  17     -64.095  63.514 -12.390  4.00  0.00           O  
ATOM    539  OP2  DT A  17     -64.187  61.914 -14.400  3.00  0.00           O1-
ATOM    540  H3   DT A  17     -63.270  56.348  -5.200  0.00  0.00           H  
ATOM    541  H6   DT A  17     -64.881  59.651  -8.290  2.00  0.00           H  
ATOM    542  H1'  DT A  17     -61.545  58.138  -9.130  8.00  0.00           H  
ATOM    543  H2'  DT A  17     -64.408  58.090 -10.400  2.00  0.00           H  
ATOM    544  H3'  DT A  17     -63.223  58.427 -12.570  5.00  0.00           H  
ATOM    545  H4'  DT A  17     -60.983  59.839 -11.150  8.00  0.00           H  
ATOM    546  H5'  DT A  17     -62.103  61.628 -11.760  6.00  0.00           H  
ATOM    547  H71  DT A  17     -66.398  60.034  -5.060  9.00  0.00           H  
ATOM    548  H72  DT A  17     -67.240  58.942  -6.290  0.00  0.00           H  
ATOM    549  H73  DT A  17     -66.547  60.442  -6.740  2.00  0.00           H  
ATOM    550 H2''  DT A  17     -63.562  56.731 -10.350  4.00  0.00           H  
ATOM    551 H5''  DT A  17     -62.305  60.501 -13.000  9.00  0.00           H  
ATOM    552  P    DA A  18     -61.013  56.924 -13.010  5.00  0.00           P  
ATOM    553  C5'  DA A  18     -58.607  56.201 -12.310  7.00  0.00           C  
ATOM    554  O5'  DA A  18     -59.948  55.895 -12.640  5.00  0.00           O  
ATOM    555  C4'  DA A  18     -57.796  55.062 -11.640  6.00  0.00           C  
ATOM    556  O4'  DA A  18     -58.191  54.783 -10.280  3.00  0.00           O  
ATOM    557  C3'  DA A  18     -57.527  53.662 -12.280  9.00  0.00           C  
ATOM    558  O3'  DA A  18     -56.179  53.260 -12.320  5.00  0.00           O  
ATOM    559  C2'  DA A  18     -58.220  52.744 -11.240  5.00  0.00           C  
ATOM    560  C1'  DA A  18     -57.852  53.435  -9.930  2.00  0.00           C  
ATOM    561  N1   DA A  18     -58.692  49.745  -6.580  5.00  0.00           N  
ATOM    562  C2   DA A  18     -57.848  49.851  -7.570  9.00  0.00           C  
ATOM    563  N3   DA A  18     -57.850  50.821  -8.450  8.00  0.00           N  
ATOM    564  C4   DA A  18     -58.682  51.819  -8.190  2.00  0.00           C  
ATOM    565  C5   DA A  18     -59.607  51.874  -7.160  4.00  0.00           C  
ATOM    566  C6   DA A  18     -59.556  50.713  -6.320  7.00  0.00           C  
ATOM    567  N6   DA A  18     -60.282  50.600  -5.300  8.00  0.00           N  
ATOM    568  N7   DA A  18     -60.299  53.088  -7.190  3.00  0.00           N  
ATOM    569  C8   DA A  18     -59.788  53.724  -8.220  1.00  0.00           C  
ATOM    570  N9   DA A  18     -58.761  53.020  -8.810  0.00  0.00           N  
ATOM    571  OP1  DA A  18     -60.412  58.084 -13.670  0.00  0.00           O  
ATOM    572  OP2  DA A  18     -62.008  56.138 -13.740  3.00  0.00           O1-
ATOM    573  H2   DA A  18     -57.194  49.030  -7.680  7.00  0.00           H  
ATOM    574  H8   DA A  18     -60.032  54.714  -8.470  2.00  0.00           H  
ATOM    575  H1'  DA A  18     -56.831  53.570  -9.670  8.00  0.00           H  
ATOM    576  H2'  DA A  18     -59.290  52.625 -11.450  2.00  0.00           H  
ATOM    577  H3'  DA A  18     -57.965  53.524 -13.300  5.00  0.00           H  
ATOM    578  H4'  DA A  18     -56.748  55.451 -11.610  7.00  0.00           H  
ATOM    579  H5'  DA A  18     -58.512  57.215 -11.870  1.00  0.00           H  
ATOM    580  H61  DA A  18     -60.056  49.889  -4.730  8.00  0.00           H  
ATOM    581  H62  DA A  18     -60.871  51.385  -5.080  1.00  0.00           H  
ATOM    582 H2''  DA A  18     -57.810  51.731 -11.340  3.00  0.00           H  
ATOM    583 H5''  DA A  18     -58.105  56.399 -13.250  1.00  0.00           H  
ATOM    584  P    DG A  19     -55.328  53.322 -13.610  8.00  0.00           P  
ATOM    585  C5'  DG A  19     -54.494  55.821 -13.180  4.00  0.00           C  
ATOM    586  O5'  DG A  19     -55.295  54.928 -13.870  0.00  0.00           O  
ATOM    587  C4'  DG A  19     -54.728  57.258 -13.630  6.00  0.00           C  
ATOM    588  O4'  DG A  19     -55.994  57.775 -13.150  8.00  0.00           O  
ATOM    589  C3'  DG A  19     -53.628  58.321 -13.340  3.00  0.00           C  
ATOM    590  O3'  DG A  19     -53.620  59.349 -14.320  1.00  0.00           O  
ATOM    591  C2'  DG A  19     -54.172  58.813 -12.000  8.00  0.00           C  
ATOM    592  C1'  DG A  19     -55.641  58.834 -12.250  2.00  0.00           C  
ATOM    593  N1   DG A  19     -56.466  56.703  -7.570  7.00  0.00           N  
ATOM    594  C2   DG A  19     -55.824  56.205  -8.670  8.00  0.00           C  
ATOM    595  N2   DG A  19     -55.177  55.017  -8.490  2.00  0.00           N  
ATOM    596  N3   DG A  19     -55.570  56.800  -9.770  6.00  0.00           N  
ATOM    597  C4   DG A  19     -56.323  57.991  -9.850  6.00  0.00           C  
ATOM    598  C5   DG A  19     -57.212  58.493  -8.930  0.00  0.00           C  
ATOM    599  C6   DG A  19     -57.252  57.867  -7.610  6.00  0.00           C  
ATOM    600  O6   DG A  19     -57.940  58.229  -6.660  0.00  0.00           O  
ATOM    601  N7   DG A  19     -57.803  59.692  -9.380  6.00  0.00           N  
ATOM    602  C8   DG A  19     -57.306  59.862 -10.580  2.00  0.00           C  
ATOM    603  N9   DG A  19     -56.421  58.826 -10.970  0.00  0.00           N  
ATOM    604  OP1  DG A  19     -56.044  52.682 -14.730  6.00  0.00           O  
ATOM    605  OP2  DG A  19     -53.976  52.823 -13.230  3.00  0.00           O1-
ATOM    606  H1   DG A  19     -56.529  56.189  -6.740  9.00  0.00           H  
ATOM    607  H8   DG A  19     -57.564  60.779 -11.120  4.00  0.00           H  
ATOM    608  H1'  DG A  19     -55.893  59.783 -12.730  0.00  0.00           H  
ATOM    609  H2'  DG A  19     -53.944  58.193 -11.180  3.00  0.00           H  
ATOM    610  H21  DG A  19     -55.311  54.493  -7.680  9.00  0.00           H  
ATOM    611  H3'  DG A  19     -52.656  57.890 -13.190  2.00  0.00           H  
ATOM    612  H22  DG A  19     -54.715  54.689  -9.350  6.00  0.00           H  
ATOM    613  H4'  DG A  19     -54.674  57.171 -14.720  9.00  0.00           H  
ATOM    614  H5'  DG A  19     -53.478  55.521 -13.410  0.00  0.00           H  
ATOM    615 H2''  DG A  19     -53.640  59.794 -11.790  2.00  0.00           H  
ATOM    616 H5''  DG A  19     -54.616  55.847 -12.070  4.00  0.00           H  
ATOM    617  P    DG A  20     -52.508  60.452 -14.370  9.00  0.00           P  
ATOM    618  C5'  DG A  20     -53.920  62.460 -13.330  8.00  0.00           C  
ATOM    619  O5'  DG A  20     -52.908  61.506 -13.200  0.00  0.00           O  
ATOM    620  C4'  DG A  20     -54.168  63.333 -12.090  0.00  0.00           C  
ATOM    621  O4'  DG A  20     -54.710  62.410 -11.140  0.00  0.00           O  
ATOM    622  C3'  DG A  20     -52.912  63.936 -11.450  1.00  0.00           C  
ATOM    623  O3'  DG A  20     -53.109  65.222 -10.960  3.00  0.00           O  
ATOM    624  C2'  DG A  20     -52.774  63.020 -10.220  4.00  0.00           C  
ATOM    625  C1'  DG A  20     -54.217  62.821  -9.890  3.00  0.00           C  
ATOM    626  N1   DG A  20     -57.131  61.510  -5.940  3.00  0.00           N  
ATOM    627  C2   DG A  20     -57.241  62.562  -6.780  7.00  0.00           C  
ATOM    628  N2   DG A  20     -58.179  63.394  -6.470  9.00  0.00           N  
ATOM    629  N3   DG A  20     -56.447  62.713  -7.820  5.00  0.00           N  
ATOM    630  C4   DG A  20     -55.465  61.795  -7.960  5.00  0.00           C  
ATOM    631  C5   DG A  20     -55.229  60.743  -7.170  1.00  0.00           C  
ATOM    632  C6   DG A  20     -56.062  60.604  -5.980  7.00  0.00           C  
ATOM    633  O6   DG A  20     -55.966  59.722  -5.060  2.00  0.00           O  
ATOM    634  N7   DG A  20     -54.024  60.091  -7.520  2.00  0.00           N  
ATOM    635  C8   DG A  20     -53.625  60.758  -8.550  9.00  0.00           C  
ATOM    636  N9   DG A  20     -54.449  61.778  -8.910  4.00  0.00           N  
ATOM    637  OP1  DG A  20     -52.768  61.099 -15.680  3.00  0.00           O  
ATOM    638  OP2  DG A  20     -51.190  59.890 -14.100  9.00  0.00           O1-
ATOM    639  H1   DG A  20     -57.833  61.356  -5.260  8.00  0.00           H  
ATOM    640  H8   DG A  20     -52.785  60.455  -9.210  2.00  0.00           H  
ATOM    641  H1'  DG A  20     -54.723  63.736  -9.650  1.00  0.00           H  
ATOM    642  H2'  DG A  20     -52.250  62.053 -10.470  1.00  0.00           H  
ATOM    643  H21  DG A  20     -58.799  63.208  -5.740  4.00  0.00           H  
ATOM    644  H3'  DG A  20     -52.169  63.852 -12.160  8.00  0.00           H  
ATOM    645  H22  DG A  20     -58.294  64.196  -7.070  9.00  0.00           H  
ATOM    646  H4'  DG A  20     -54.926  64.108 -12.330  3.00  0.00           H  
ATOM    647  H5'  DG A  20     -54.812  61.930 -13.570  7.00  0.00           H  
ATOM    648 H2''  DG A  20     -52.285  63.473  -9.370  8.00  0.00           H  
ATOM    649 H5''  DG A  20     -53.687  63.067 -14.240  5.00  0.00           H  
ATOM    650  P    DG A  21     -52.169  66.460 -11.480  2.00  0.00           P  
ATOM    651  C5'  DG A  21     -49.660  66.535 -10.770  8.00  0.00           C  
ATOM    652  O5'  DG A  21     -50.918  65.826 -10.860  7.00  0.00           O  
ATOM    653  C4'  DG A  21     -48.596  65.877  -9.830  5.00  0.00           C  
ATOM    654  O4'  DG A  21     -48.954  65.952  -8.540  2.00  0.00           O  
ATOM    655  C3'  DG A  21     -48.185  64.428 -10.040  9.00  0.00           C  
ATOM    656  O3'  DG A  21     -46.816  64.273  -9.590  2.00  0.00           O  
ATOM    657  C2'  DG A  21     -49.125  63.712  -9.240  6.00  0.00           C  
ATOM    658  C1'  DG A  21     -49.277  64.622  -8.090  1.00  0.00           C  
ATOM    659  N1   DG A  21     -52.608  61.901  -5.410  8.00  0.00           N  
ATOM    660  C2   DG A  21     -51.365  61.634  -5.730  6.00  0.00           C  
ATOM    661  N2   DG A  21     -50.906  60.558  -5.270  5.00  0.00           N  
ATOM    662  N3   DG A  21     -50.635  62.385  -6.550  9.00  0.00           N  
ATOM    663  C4   DG A  21     -51.199  63.618  -6.800  7.00  0.00           C  
ATOM    664  C5   DG A  21     -52.400  64.052  -6.380  2.00  0.00           C  
ATOM    665  C6   DG A  21     -53.239  63.125  -5.610  8.00  0.00           C  
ATOM    666  O6   DG A  21     -54.314  63.217  -5.060  4.00  0.00           O  
ATOM    667  N7   DG A  21     -52.605  65.372  -6.760  6.00  0.00           N  
ATOM    668  C8   DG A  21     -51.567  65.619  -7.530  5.00  0.00           C  
ATOM    669  N9   DG A  21     -50.629  64.643  -7.480  7.00  0.00           N  
ATOM    670  OP1  DG A  21     -52.444  67.716 -10.770  5.00  0.00           O  
ATOM    671  OP2  DG A  21     -52.053  66.416 -12.990  1.00  0.00           O1-
ATOM    672  H1   DG A  21     -52.996  61.302  -4.800  3.00  0.00           H  
ATOM    673  H8   DG A  21     -51.470  66.508  -8.110  5.00  0.00           H  
ATOM    674  H1'  DG A  21     -48.510  64.320  -7.450  3.00  0.00           H  
ATOM    675  H2'  DG A  21     -50.019  63.643  -9.850  7.00  0.00           H  
ATOM    676  H21  DG A  21     -51.520  59.878  -4.800  6.00  0.00           H  
ATOM    677  H3'  DG A  21     -48.245  64.291 -11.140  4.00  0.00           H  
ATOM    678  H22  DG A  21     -49.872  60.386  -5.360  3.00  0.00           H  
ATOM    679  H4'  DG A  21     -47.759  66.528  -9.960  5.00  0.00           H  
ATOM    680  H5'  DG A  21     -49.842  67.531 -10.410  7.00  0.00           H  
ATOM    681 H2''  DG A  21     -48.756  62.784  -8.900  5.00  0.00           H  
ATOM    682 H5''  DG A  21     -49.182  66.670 -11.750  4.00  0.00           H  
ATOM    683  P    DT A  22     -46.061  62.920  -9.980  9.00  0.00           P  
ATOM    684  C5'  DT A  22     -45.502  61.557  -7.720  5.00  0.00           C  
ATOM    685  O5'  DT A  22     -46.447  61.953  -8.740  8.00  0.00           O  
ATOM    686  C4'  DT A  22     -45.177  62.741  -6.840  8.00  0.00           C  
ATOM    687  O4'  DT A  22     -46.362  63.466  -6.680  8.00  0.00           O  
ATOM    688  C3'  DT A  22     -44.717  62.531  -5.370  9.00  0.00           C  
ATOM    689  O3'  DT A  22     -43.438  62.028  -5.090  3.00  0.00           O  
ATOM    690  C2'  DT A  22     -45.037  63.937  -4.790  0.00  0.00           C  
ATOM    691  C1'  DT A  22     -46.151  64.500  -5.730  7.00  0.00           C  
ATOM    692  N1   DT A  22     -47.478  64.683  -5.050  2.00  0.00           N  
ATOM    693  C2   DT A  22     -48.041  65.978  -5.110  7.00  0.00           C  
ATOM    694  O2   DT A  22     -47.498  66.911  -5.680  2.00  0.00           O  
ATOM    695  N3   DT A  22     -49.267  66.179  -4.520  7.00  0.00           N  
ATOM    696  C4   DT A  22     -49.965  65.194  -3.840  1.00  0.00           C  
ATOM    697  O4   DT A  22     -51.121  65.507  -3.480  2.00  0.00           O  
ATOM    698  C5   DT A  22     -49.225  63.936  -3.640  5.00  0.00           C  
ATOM    699  C6   DT A  22     -47.998  63.760  -4.220  8.00  0.00           C  
ATOM    700  C7   DT A  22     -49.939  62.853  -2.860  8.00  0.00           C  
ATOM    701  OP1  DT A  22     -44.641  63.386  -9.870  2.00  0.00           O  
ATOM    702  OP2  DT A  22     -46.574  62.319 -11.220  3.00  0.00           O1-
ATOM    703  H3   DT A  22     -49.772  67.029  -4.670  6.00  0.00           H  
ATOM    704  H6   DT A  22     -47.498  62.844  -4.110  2.00  0.00           H  
ATOM    705  H1'  DT A  22     -45.811  65.482  -6.290  5.00  0.00           H  
ATOM    706  H2'  DT A  22     -45.238  63.811  -3.730  3.00  0.00           H  
ATOM    707  H3'  DT A  22     -45.429  61.944  -4.840  9.00  0.00           H  
ATOM    708  H4'  DT A  22     -44.471  63.406  -7.380  0.00  0.00           H  
ATOM    709  H5'  DT A  22     -44.682  61.188  -8.110  3.00  0.00           H  
ATOM    710  H71  DT A  22     -49.425  61.967  -3.150  3.00  0.00           H  
ATOM    711  H72  DT A  22     -49.747  63.025  -1.790  0.00  0.00           H  
ATOM    712  H73  DT A  22     -50.996  62.838  -3.090  4.00  0.00           H  
ATOM    713 H2''  DT A  22     -44.120  64.529  -4.920  7.00  0.00           H  
ATOM    714 H5''  DT A  22     -45.908  60.850  -7.020  7.00  0.00           H  
ATOM    715  P    DT A  23     -43.225  60.608  -4.460  7.00  0.00           P  
ATOM    716  C5'  DT A  23     -43.061  61.090  -1.810  2.00  0.00           C  
ATOM    717  O5'  DT A  23     -43.803  60.647  -2.950  0.00  0.00           O  
ATOM    718  C4'  DT A  23     -44.062  61.079  -0.590  1.00  0.00           C  
ATOM    719  O4'  DT A  23     -44.756  62.313  -0.530  4.00  0.00           O  
ATOM    720  C3'  DT A  23     -45.062  59.836  -0.500  3.00  0.00           C  
ATOM    721  O3'  DT A  23     -45.290  59.398   0.800  3.00  0.00           O  
ATOM    722  C2'  DT A  23     -46.319  60.707  -0.950  1.00  0.00           C  
ATOM    723  C1'  DT A  23     -46.080  62.015  -0.150  5.00  0.00           C  
ATOM    724  N1   DT A  23     -46.880  63.227  -0.300  0.00  0.00           N  
ATOM    725  C2   DT A  23     -48.030  63.275   0.520  9.00  0.00           C  
ATOM    726  O2   DT A  23     -48.440  62.298   1.170  1.00  0.00           O  
ATOM    727  N3   DT A  23     -48.701  64.470   0.630  1.00  0.00           N  
ATOM    728  C4   DT A  23     -48.403  65.593  -0.060  9.00  0.00           C  
ATOM    729  O4   DT A  23     -49.103  66.585   0.210  4.00  0.00           O  
ATOM    730  C5   DT A  23     -47.296  65.447  -1.040  2.00  0.00           C  
ATOM    731  C6   DT A  23     -46.550  64.303  -1.090  9.00  0.00           C  
ATOM    732  C7   DT A  23     -46.881  66.638  -1.900  4.00  0.00           C  
ATOM    733  OP1  DT A  23     -41.776  60.480  -4.360  3.00  0.00           O  
ATOM    734  OP2  DT A  23     -43.943  59.636  -5.200  2.00  0.00           O1-
ATOM    735  H3   DT A  23     -49.570  64.440   1.170  0.00  0.00           H  
ATOM    736  H6   DT A  23     -45.652  64.204  -1.720  5.00  0.00           H  
ATOM    737  H1'  DT A  23     -46.030  61.812   0.920  2.00  0.00           H  
ATOM    738  H2'  DT A  23     -46.291  60.873  -2.010  3.00  0.00           H  
ATOM    739  H3'  DT A  23     -44.838  59.026  -1.260  2.00  0.00           H  
ATOM    740  H4'  DT A  23     -43.336  60.963   0.220  5.00  0.00           H  
ATOM    741  H5'  DT A  23     -42.628  62.077  -2.080  3.00  0.00           H  
ATOM    742  H71  DT A  23     -47.686  66.889  -2.540  1.00  0.00           H  
ATOM    743  H72  DT A  23     -46.689  67.440  -1.200  6.00  0.00           H  
ATOM    744  H73  DT A  23     -46.001  66.392  -2.400  2.00  0.00           H  
ATOM    745 H2''  DT A  23     -47.298  60.240  -0.670  1.00  0.00           H  
ATOM    746 H5''  DT A  23     -42.230  60.464  -1.670  8.00  0.00           H  
ATOM    747  P    DA A  24     -45.315  57.884   1.280  7.00  0.00           P  
ATOM    748  C5'  DA A  24     -47.872  58.416   1.710  1.00  0.00           C  
ATOM    749  O5'  DA A  24     -46.832  57.576   1.120  5.00  0.00           O  
ATOM    750  C4'  DA A  24     -48.157  57.958   3.130  5.00  0.00           C  
ATOM    751  O4'  DA A  24     -49.143  58.707   3.710  3.00  0.00           O  
ATOM    752  C3'  DA A  24     -48.666  56.503   3.150  8.00  0.00           C  
ATOM    753  O3'  DA A  24     -48.299  55.923   4.400  1.00  0.00           O  
ATOM    754  C2'  DA A  24     -50.154  56.803   2.840  0.00  0.00           C  
ATOM    755  C1'  DA A  24     -50.349  57.978   3.770  8.00  0.00           C  
ATOM    756  N1   DA A  24     -52.550  61.734   0.960  9.00  0.00           N  
ATOM    757  C2   DA A  24     -51.373  61.144   0.850  4.00  0.00           C  
ATOM    758  N3   DA A  24     -50.947  60.081   1.550  4.00  0.00           N  
ATOM    759  C4   DA A  24     -51.827  59.654   2.520  5.00  0.00           C  
ATOM    760  C5   DA A  24     -53.015  60.230   2.840  3.00  0.00           C  
ATOM    761  C6   DA A  24     -53.319  61.361   1.950  8.00  0.00           C  
ATOM    762  N6   DA A  24     -54.367  62.123   1.960  7.00  0.00           N  
ATOM    763  N7   DA A  24     -53.627  59.727   4.000  3.00  0.00           N  
ATOM    764  C8   DA A  24     -52.684  58.914   4.390  7.00  0.00           C  
ATOM    765  N9   DA A  24     -51.620  58.713   3.520  1.00  0.00           N  
ATOM    766  OP1  DA A  24     -44.998  57.974   2.700  5.00  0.00           O  
ATOM    767  OP2  DA A  24     -44.488  56.993   0.410  1.00  0.00           O1-
ATOM    768  H2   DA A  24     -50.732  61.406   0.030  1.00  0.00           H  
ATOM    769  H8   DA A  24     -52.773  58.295   5.340  7.00  0.00           H  
ATOM    770  H1'  DA A  24     -50.508  57.554   4.770  9.00  0.00           H  
ATOM    771  H2'  DA A  24     -50.375  57.085   1.810  6.00  0.00           H  
ATOM    772  H3'  DA A  24     -48.263  55.885   2.360  7.00  0.00           H  
ATOM    773  H4'  DA A  24     -47.260  58.090   3.710  9.00  0.00           H  
ATOM    774  H5'  DA A  24     -48.763  58.355   1.220  0.00  0.00           H  
ATOM    775  H61  DA A  24     -54.331  62.900   1.290  3.00  0.00           H  
ATOM    776  H62  DA A  24     -55.167  62.033   2.550  2.00  0.00           H  
ATOM    777 H2''  DA A  24     -50.839  55.998   3.060  6.00  0.00           H  
ATOM    778 H5''  DA A  24     -47.574  59.469   1.640  9.00  0.00           H  
ATOM    779  P    DG A  25     -48.644  54.536   4.950  4.00  0.00           P  
ATOM    780  C5'  DG A  25     -50.882  55.080   6.070  2.00  0.00           C  
ATOM    781  O5'  DG A  25     -50.189  54.407   5.050  0.00  0.00           O  
ATOM    782  C4'  DG A  25     -52.413  55.230   5.830  8.00  0.00           C  
ATOM    783  O4'  DG A  25     -52.748  55.832   4.540  9.00  0.00           O  
ATOM    784  C3'  DG A  25     -53.079  53.854   5.780  2.00  0.00           C  
ATOM    785  O3'  DG A  25     -54.393  54.016   6.320  5.00  0.00           O  
ATOM    786  C2'  DG A  25     -53.158  53.498   4.250  3.00  0.00           C  
ATOM    787  C1'  DG A  25     -53.580  54.929   3.780  4.00  0.00           C  
ATOM    788  N1   DG A  25     -54.487  58.124  -0.170  1.00  0.00           N  
ATOM    789  C2   DG A  25     -55.079  58.028   1.090  1.00  0.00           C  
ATOM    790  N2   DG A  25     -56.012  58.893   1.470  1.00  0.00           N  
ATOM    791  N3   DG A  25     -54.799  57.055   1.960  3.00  0.00           N  
ATOM    792  C4   DG A  25     -53.854  56.187   1.520  7.00  0.00           C  
ATOM    793  C5   DG A  25     -53.147  56.314   0.320  5.00  0.00           C  
ATOM    794  C6   DG A  25     -53.436  57.328  -0.610  9.00  0.00           C  
ATOM    795  O6   DG A  25     -52.931  57.502  -1.720  8.00  0.00           O  
ATOM    796  N7   DG A  25     -52.252  55.215   0.340  2.00  0.00           N  
ATOM    797  C8   DG A  25     -52.458  54.623   1.410  5.00  0.00           C  
ATOM    798  N9   DG A  25     -53.225  55.247   2.320  2.00  0.00           N  
ATOM    799  OP1  DG A  25     -48.006  54.495   6.340  0.00  0.00           O  
ATOM    800  OP2  DG A  25     -48.329  53.447   3.980  3.00  0.00           O1-
ATOM    801  H1   DG A  25     -54.814  58.859  -0.800  1.00  0.00           H  
ATOM    802  H8   DG A  25     -51.994  53.704   1.680  7.00  0.00           H  
ATOM    803  H1'  DG A  25     -54.612  55.180   4.020  2.00  0.00           H  
ATOM    804  H2'  DG A  25     -52.228  53.217   3.770  2.00  0.00           H  
ATOM    805  H21  DG A  25     -56.383  59.474   0.760  1.00  0.00           H  
ATOM    806  H3'  DG A  25     -52.553  53.129   6.400  6.00  0.00           H  
ATOM    807  H22  DG A  25     -56.463  58.756   2.360  9.00  0.00           H  
ATOM    808  H4'  DG A  25     -52.829  55.961   6.610  1.00  0.00           H  
ATOM    809  H5'  DG A  25     -50.400  56.092   6.090  3.00  0.00           H  
ATOM    810 H2''  DG A  25     -53.869  52.720   4.050  3.00  0.00           H  
ATOM    811 H5''  DG A  25     -50.620  54.658   7.010  6.00  0.00           H  
ATOM    812  P    DG A  26     -55.405  52.861   6.740  0.00  0.00           P  
ATOM    813  C5'  DG A  26     -56.837  53.434   4.690  3.00  0.00           C  
ATOM    814  O5'  DG A  26     -56.213  52.493   5.410  6.00  0.00           O  
ATOM    815  C4'  DG A  26     -58.229  53.904   5.180  7.00  0.00           C  
ATOM    816  O4'  DG A  26     -58.659  55.203   4.740  8.00  0.00           O  
ATOM    817  C3'  DG A  26     -59.412  53.052   4.810  4.00  0.00           C  
ATOM    818  O3'  DG A  26     -60.498  53.245   5.740  8.00  0.00           O  
ATOM    819  C2'  DG A  26     -59.754  53.578   3.460  9.00  0.00           C  
ATOM    820  C1'  DG A  26     -59.713  55.052   3.720  4.00  0.00           C  
ATOM    821  N1   DG A  26     -57.235  55.806  -0.650  5.00  0.00           N  
ATOM    822  C2   DG A  26     -57.083  54.759   0.300  9.00  0.00           C  
ATOM    823  N2   DG A  26     -56.479  53.630  -0.130  7.00  0.00           N  
ATOM    824  N3   DG A  26     -57.728  54.785   1.470  9.00  0.00           N  
ATOM    825  C4   DG A  26     -58.555  55.813   1.600  0.00  0.00           C  
ATOM    826  C5   DG A  26     -58.738  56.890   0.780  9.00  0.00           C  
ATOM    827  C6   DG A  26     -58.062  56.911  -0.460  3.00  0.00           C  
ATOM    828  O6   DG A  26     -58.109  57.743  -1.330  9.00  0.00           O  
ATOM    829  N7   DG A  26     -59.805  57.718   1.240  0.00  0.00           N  
ATOM    830  C8   DG A  26     -60.197  57.140   2.330  4.00  0.00           C  
ATOM    831  N9   DG A  26     -59.523  56.005   2.620  4.00  0.00           N  
ATOM    832  OP1  DG A  26     -56.355  53.570   7.640  3.00  0.00           O  
ATOM    833  OP2  DG A  26     -54.688  51.709   7.280  9.00  0.00           O1-
ATOM    834  H1   DG A  26     -56.833  55.639  -1.540  8.00  0.00           H  
ATOM    835  H8   DG A  26     -61.094  57.442   2.820  1.00  0.00           H  
ATOM    836  H1'  DG A  26     -60.631  55.208   4.250  1.00  0.00           H  
ATOM    837  H2'  DG A  26     -59.135  53.155   2.680  6.00  0.00           H  
ATOM    838  H21  DG A  26     -56.231  53.660  -1.080  8.00  0.00           H  
ATOM    839  H3'  DG A  26     -59.122  51.969   4.750  9.00  0.00           H  
ATOM    840  H22  DG A  26     -56.545  52.737   0.350  8.00  0.00           H  
ATOM    841  H4'  DG A  26     -58.224  54.063   6.190  2.00  0.00           H  
ATOM    842  H5'  DG A  26     -56.834  53.067   3.660  5.00  0.00           H  
ATOM    843 H2''  DG A  26     -60.762  53.322   3.210  9.00  0.00           H  
ATOM    844 H5''  DG A  26     -56.151  54.266   4.600  4.00  0.00           H  
ATOM    845  P    DG A  27     -61.752  52.331   5.860  4.00  0.00           P  
ATOM    846  C5'  DG A  27     -63.561  54.065   5.170  3.00  0.00           C  
ATOM    847  O5'  DG A  27     -62.868  52.811   4.940  8.00  0.00           O  
ATOM    848  C4'  DG A  27     -64.228  54.615   3.910  6.00  0.00           C  
ATOM    849  O4'  DG A  27     -63.197  55.075   2.950  4.00  0.00           O  
ATOM    850  C3'  DG A  27     -65.080  53.703   3.080  4.00  0.00           C  
ATOM    851  O3'  DG A  27     -66.387  54.229   2.880  1.00  0.00           O  
ATOM    852  C2'  DG A  27     -64.307  53.377   1.790  2.00  0.00           C  
ATOM    853  C1'  DG A  27     -63.601  54.712   1.630  4.00  0.00           C  
ATOM    854  N1   DG A  27     -61.746  57.338  -2.410  1.00  0.00           N  
ATOM    855  C2   DG A  27     -62.832  57.623  -1.640  4.00  0.00           C  
ATOM    856  N2   DG A  27     -63.432  58.742  -1.830  5.00  0.00           N  
ATOM    857  N3   DG A  27     -63.182  56.898  -0.560  4.00  0.00           N  
ATOM    858  C4   DG A  27     -62.395  55.831  -0.350  4.00  0.00           C  
ATOM    859  C5   DG A  27     -61.269  55.486  -0.990  2.00  0.00           C  
ATOM    860  C6   DG A  27     -60.878  56.318  -2.110  4.00  0.00           C  
ATOM    861  O6   DG A  27     -59.893  56.230  -2.800  7.00  0.00           O  
ATOM    862  N7   DG A  27     -60.655  54.356  -0.420  9.00  0.00           N  
ATOM    863  C8   DG A  27     -61.487  53.994   0.520  8.00  0.00           C  
ATOM    864  N9   DG A  27     -62.545  54.874   0.670  9.00  0.00           N  
ATOM    865  OP1  DG A  27     -62.335  52.469   7.190  0.00  0.00           O  
ATOM    866  OP2  DG A  27     -61.408  50.969   5.420  4.00  0.00           O1-
ATOM    867  H1   DG A  27     -61.470  58.126  -3.010  5.00  0.00           H  
ATOM    868  H8   DG A  27     -61.409  53.047   1.070  7.00  0.00           H  
ATOM    869  H1'  DG A  27     -64.384  55.392   1.360  3.00  0.00           H  
ATOM    870  H2'  DG A  27     -63.601  52.576   2.060  8.00  0.00           H  
ATOM    871  H21  DG A  27     -63.511  59.178  -2.740  1.00  0.00           H  
ATOM    872  H3'  DG A  27     -65.171  52.778   3.630  4.00  0.00           H  
ATOM    873  H22  DG A  27     -64.227  59.021  -1.240  9.00  0.00           H  
ATOM    874  H4'  DG A  27     -64.805  55.539   4.180  4.00  0.00           H  
ATOM    875  H5'  DG A  27     -62.900  54.750   5.620  9.00  0.00           H  
ATOM    876 H2''  DG A  27     -64.918  53.195   0.920  5.00  0.00           H  
ATOM    877 H5''  DG A  27     -64.241  53.867   6.030  0.00  0.00           H  
ATOM    878  P    DT A  28     -67.724  53.325   2.910  5.00  0.00           P  
ATOM    879  C5'  DT A  28     -69.378  52.656   1.000  3.00  0.00           C  
ATOM    880  O5'  DT A  28     -68.178  53.228   1.360  2.00  0.00           O  
ATOM    881  C4'  DT A  28     -69.659  52.670  -0.520  1.00  0.00           C  
ATOM    882  O4'  DT A  28     -69.606  53.985  -1.000  7.00  0.00           O  
ATOM    883  C3'  DT A  28     -68.608  51.947  -1.380  6.00  0.00           C  
ATOM    884  O3'  DT A  28     -69.135  51.225  -2.460  9.00  0.00           O  
ATOM    885  C2'  DT A  28     -67.659  53.066  -1.770  3.00  0.00           C  
ATOM    886  C1'  DT A  28     -68.626  54.146  -2.090  7.00  0.00           C  
ATOM    887  N1   DT A  28     -68.178  55.492  -2.000  9.00  0.00           N  
ATOM    888  C2   DT A  28     -68.067  56.350  -3.050  3.00  0.00           C  
ATOM    889  O2   DT A  28     -68.283  55.997  -4.180  5.00  0.00           O  
ATOM    890  N3   DT A  28     -67.745  57.685  -2.800  9.00  0.00           N  
ATOM    891  C4   DT A  28     -67.295  58.209  -1.630  6.00  0.00           C  
ATOM    892  O4   DT A  28     -66.722  59.298  -1.540  9.00  0.00           O  
ATOM    893  C5   DT A  28     -67.493  57.263  -0.530  6.00  0.00           C  
ATOM    894  C6   DT A  28     -67.861  55.952  -0.730  0.00  0.00           C  
ATOM    895  C7   DT A  28     -67.227  57.716   0.910  0.00  0.00           C  
ATOM    896  OP1  DT A  28     -68.683  54.099   3.690  8.00  0.00           O  
ATOM    897  OP2  DT A  28     -67.368  51.934   3.380  6.00  0.00           O1-
ATOM    898  H3   DT A  28     -67.517  58.261  -3.650  3.00  0.00           H  
ATOM    899  H6   DT A  28     -67.840  55.311   0.180  5.00  0.00           H  
ATOM    900  H1'  DT A  28     -69.175  53.916  -3.040  7.00  0.00           H  
ATOM    901  H2'  DT A  28     -66.934  53.380  -0.960  4.00  0.00           H  
ATOM    902  H3'  DT A  28     -68.052  51.256  -0.730  9.00  0.00           H  
ATOM    903  H4'  DT A  28     -70.590  52.249  -0.780  1.00  0.00           H  
ATOM    904  H5'  DT A  28     -70.201  53.283   1.470  6.00  0.00           H  
ATOM    905  H71  DT A  28     -68.170  58.061   1.370  8.00  0.00           H  
ATOM    906  H72  DT A  28     -66.814  56.947   1.610  5.00  0.00           H  
ATOM    907  H73  DT A  28     -66.435  58.516   0.980  8.00  0.00           H  
ATOM    908 H2''  DT A  28     -67.186  52.684  -2.710  4.00  0.00           H  
ATOM    909 H5''  DT A  28     -69.379  51.582   1.360  8.00  0.00           H  
ATOM    910  P    DT A  29     -69.822  49.752  -2.400  7.00  0.00           P  
ATOM    911  C5'  DT A  29     -68.481  47.533  -2.580  9.00  0.00           C  
ATOM    912  O5'  DT A  29     -68.466  48.897  -2.540  4.00  0.00           O  
ATOM    913  C4'  DT A  29     -67.076  47.024  -2.880  7.00  0.00           C  
ATOM    914  O4'  DT A  29     -66.512  47.746  -4.030  2.00  0.00           O  
ATOM    915  C3'  DT A  29     -66.141  47.237  -1.680  7.00  0.00           C  
ATOM    916  O3'  DT A  29     -65.229  46.193  -1.600  3.00  0.00           O  
ATOM    917  C2'  DT A  29     -65.499  48.574  -2.070  6.00  0.00           C  
ATOM    918  C1'  DT A  29     -65.324  48.311  -3.550  7.00  0.00           C  
ATOM    919  N1   DT A  29     -64.955  49.470  -4.340  4.00  0.00           N  
ATOM    920  C2   DT A  29     -63.785  49.456  -5.110  4.00  0.00           C  
ATOM    921  O2   DT A  29     -63.074  48.479  -5.270  7.00  0.00           O  
ATOM    922  N3   DT A  29     -63.442  50.618  -5.740  3.00  0.00           N  
ATOM    923  C4   DT A  29     -64.259  51.754  -5.790  8.00  0.00           C  
ATOM    924  O4   DT A  29     -63.815  52.706  -6.410  2.00  0.00           O  
ATOM    925  C5   DT A  29     -65.479  51.738  -5.010  6.00  0.00           C  
ATOM    926  C6   DT A  29     -65.777  50.597  -4.310  6.00  0.00           C  
ATOM    927  C7   DT A  29     -66.490  52.819  -5.190  6.00  0.00           C  
ATOM    928  OP1  DT A  29     -70.633  49.486  -3.620  7.00  0.00           O  
ATOM    929  OP2  DT A  29     -70.475  49.554  -1.050  9.00  0.00           O1-
ATOM    930  H3   DT A  29     -62.525  50.636  -6.110  0.00  0.00           H  
ATOM    931  H6   DT A  29     -66.767  50.558  -3.750  8.00  0.00           H  
ATOM    932  H1'  DT A  29     -64.504  47.607  -3.660  2.00  0.00           H  
ATOM    933  H2'  DT A  29     -66.166  49.413  -1.710  3.00  0.00           H  
ATOM    934  H3'  DT A  29     -66.636  47.466  -0.800  8.00  0.00           H  
ATOM    935  H4'  DT A  29     -67.082  45.942  -3.030  8.00  0.00           H  
ATOM    936  H5'  DT A  29     -69.103  47.234  -3.400  9.00  0.00           H  
ATOM    937  H71  DT A  29     -67.440  52.594  -4.800  4.00  0.00           H  
ATOM    938  H72  DT A  29     -66.100  53.610  -4.580  8.00  0.00           H  
ATOM    939  H73  DT A  29     -66.590  53.159  -6.260  3.00  0.00           H  
ATOM    940 H2''  DT A  29     -64.554  48.852  -1.590  0.00  0.00           H  
ATOM    941 H5''  DT A  29     -68.796  47.042  -1.650  6.00  0.00           H  
ATOM    942  P    DA A  30     -63.946  46.207  -0.610  7.00  0.00           P  
ATOM    943  C5'  DA A  30     -61.936  47.145  -1.870  6.00  0.00           C  
ATOM    944  O5'  DA A  30     -62.910  47.396  -0.900  6.00  0.00           O  
ATOM    945  C4'  DA A  30     -60.980  48.366  -2.060  6.00  0.00           C  
ATOM    946  O4'  DA A  30     -61.720  49.395  -2.640  4.00  0.00           O  
ATOM    947  C3'  DA A  30     -60.425  48.869  -0.730  4.00  0.00           C  
ATOM    948  O3'  DA A  30     -59.021  49.060  -0.830  3.00  0.00           O  
ATOM    949  C2'  DA A  30     -61.305  50.042  -0.400  2.00  0.00           C  
ATOM    950  C1'  DA A  30     -61.479  50.557  -1.810  0.00  0.00           C  
ATOM    951  N1   DA A  30     -62.847  54.910  -4.210  3.00  0.00           N  
ATOM    952  C2   DA A  30     -61.754  54.140  -4.310  3.00  0.00           C  
ATOM    953  N3   DA A  30     -61.539  52.919  -3.650  5.00  0.00           N  
ATOM    954  C4   DA A  30     -62.585  52.566  -2.840  8.00  0.00           C  
ATOM    955  C5   DA A  30     -63.727  53.291  -2.620  0.00  0.00           C  
ATOM    956  C6   DA A  30     -63.795  54.508  -3.340  8.00  0.00           C  
ATOM    957  N6   DA A  30     -64.776  55.290  -3.260  5.00  0.00           N  
ATOM    958  N7   DA A  30     -64.590  52.558  -1.790  0.00  0.00           N  
ATOM    959  C8   DA A  30     -63.818  51.627  -1.280  2.00  0.00           C  
ATOM    960  N9   DA A  30     -62.584  51.509  -1.920  5.00  0.00           N  
ATOM    961  OP1  DA A  30     -63.319  44.867  -0.860  7.00  0.00           O  
ATOM    962  OP2  DA A  30     -64.432  46.438   0.770  6.00  0.00           O1-
ATOM    963  H2   DA A  30     -61.130  54.469  -5.090  6.00  0.00           H  
ATOM    964  H8   DA A  30     -64.200  50.904  -0.550  3.00  0.00           H  
ATOM    965  H1'  DA A  30     -60.562  51.029  -2.250  6.00  0.00           H  
ATOM    966  H2'  DA A  30     -62.268  49.780   0.040  3.00  0.00           H  
ATOM    967  H3'  DA A  30     -60.519  48.212   0.140  0.00  0.00           H  
ATOM    968  H4'  DA A  30     -60.096  48.247  -2.690  9.00  0.00           H  
ATOM    969  H5'  DA A  30     -62.345  46.887  -2.870  0.00  0.00           H  
ATOM    970  H61  DA A  30     -64.679  56.171  -3.720  2.00  0.00           H  
ATOM    971  H62  DA A  30     -65.467  55.200  -2.580  9.00  0.00           H  
ATOM    972 H2''  DA A  30     -60.817  50.833   0.190  5.00  0.00           H  
ATOM    973 H5''  DA A  30     -61.325  46.368  -1.590  8.00  0.00           H  
ATOM    974  P    DG A  31     -58.037  47.915  -0.360  9.00  0.00           P  
ATOM    975  C5'  DG A  31     -57.057  48.332  -2.720  3.00  0.00           C  
ATOM    976  O5'  DG A  31     -56.820  48.065  -1.310  5.00  0.00           O  
ATOM    977  C4'  DG A  31     -55.791  48.234  -3.560  8.00  0.00           C  
ATOM    978  O4'  DG A  31     -55.978  48.871  -4.840  4.00  0.00           O  
ATOM    979  C3'  DG A  31     -54.528  48.764  -2.940  7.00  0.00           C  
ATOM    980  O3'  DG A  31     -53.285  48.117  -3.280  1.00  0.00           O  
ATOM    981  C2'  DG A  31     -54.555  50.184  -3.460  7.00  0.00           C  
ATOM    982  C1'  DG A  31     -55.133  50.008  -4.830  2.00  0.00           C  
ATOM    983  N1   DG A  31     -58.377  53.850  -3.650  1.00  0.00           N  
ATOM    984  C2   DG A  31     -58.147  52.690  -3.020  2.00  0.00           C  
ATOM    985  N2   DG A  31     -58.848  52.372  -1.940  7.00  0.00           N  
ATOM    986  N3   DG A  31     -57.263  51.797  -3.400  6.00  0.00           N  
ATOM    987  C4   DG A  31     -56.603  52.147  -4.570  1.00  0.00           C  
ATOM    988  C5   DG A  31     -56.838  53.267  -5.360  4.00  0.00           C  
ATOM    989  C6   DG A  31     -57.830  54.193  -4.890  1.00  0.00           C  
ATOM    990  O6   DG A  31     -58.220  55.260  -5.340  0.00  0.00           O  
ATOM    991  N7   DG A  31     -56.056  53.172  -6.510  9.00  0.00           N  
ATOM    992  C8   DG A  31     -55.542  51.970  -6.430  2.00  0.00           C  
ATOM    993  N9   DG A  31     -55.750  51.294  -5.260  4.00  0.00           N  
ATOM    994  OP1  DG A  31     -58.626  46.595  -0.650  8.00  0.00           O  
ATOM    995  OP2  DG A  31     -57.547  48.188   1.040  0.00  0.00           O1-
ATOM    996  H1   DG A  31     -58.930  54.577  -3.230  3.00  0.00           H  
ATOM    997  H8   DG A  31     -54.876  51.581  -7.190  7.00  0.00           H  
ATOM    998  H1'  DG A  31     -54.319  49.859  -5.450  0.00  0.00           H  
ATOM    999  H2'  DG A  31     -55.260  50.789  -2.820  0.00  0.00           H  
ATOM   1000  H21  DG A  31     -59.538  53.001  -1.510  4.00  0.00           H  
ATOM   1001  H3'  DG A  31     -54.636  48.682  -1.870  7.00  0.00           H  
ATOM   1002  H22  DG A  31     -58.548  51.474  -1.570  4.00  0.00           H  
ATOM   1003  H4'  DG A  31     -55.544  47.179  -3.790  5.00  0.00           H  
ATOM   1004  H5'  DG A  31     -57.552  49.286  -2.750  8.00  0.00           H  
ATOM   1005 H2''  DG A  31     -53.555  50.626  -3.670  0.00  0.00           H  
ATOM   1006 H5''  DG A  31     -57.716  47.619  -3.160  7.00  0.00           H  
ATOM   1007  P    DG A  32     -52.048  48.092  -2.230  4.00  0.00           P  
ATOM   1008  C5'  DG A  32     -50.616  49.864  -3.550  6.00  0.00           C  
ATOM   1009  O5'  DG A  32     -51.529  49.592  -2.530  3.00  0.00           O  
ATOM   1010  C4'  DG A  32     -50.386  51.334  -3.740  1.00  0.00           C  
ATOM   1011  O4'  DG A  32     -51.472  52.107  -4.150  9.00  0.00           O  
ATOM   1012  C3'  DG A  32     -49.754  51.975  -2.440  8.00  0.00           C  
ATOM   1013  O3'  DG A  32     -48.707  52.938  -2.760  9.00  0.00           O  
ATOM   1014  C2'  DG A  32     -50.997  52.669  -1.910  3.00  0.00           C  
ATOM   1015  C1'  DG A  32     -51.487  53.208  -3.270  5.00  0.00           C  
ATOM   1016  N1   DG A  32     -54.673  57.066  -4.830  5.00  0.00           N  
ATOM   1017  C2   DG A  32     -53.406  56.866  -5.160  3.00  0.00           C  
ATOM   1018  N2   DG A  32     -52.705  57.729  -5.850  2.00  0.00           N  
ATOM   1019  N3   DG A  32     -52.647  55.853  -4.750  4.00  0.00           N  
ATOM   1020  C4   DG A  32     -53.299  55.066  -3.870  1.00  0.00           C  
ATOM   1021  C5   DG A  32     -54.615  55.179  -3.410  4.00  0.00           C  
ATOM   1022  C6   DG A  32     -55.397  56.338  -3.960  9.00  0.00           C  
ATOM   1023  O6   DG A  32     -56.566  56.725  -3.790  4.00  0.00           O  
ATOM   1024  N7   DG A  32     -54.968  54.185  -2.510  4.00  0.00           N  
ATOM   1025  C8   DG A  32     -53.896  53.479  -2.400  5.00  0.00           C  
ATOM   1026  N9   DG A  32     -52.810  53.918  -3.190  2.00  0.00           N  
ATOM   1027  OP1  DG A  32     -51.025  47.201  -2.730  4.00  0.00           O  
ATOM   1028  OP2  DG A  32     -52.600  47.990  -0.890  1.00  0.00           O1-
ATOM   1029  H1   DG A  32     -55.177  57.966  -5.120  6.00  0.00           H  
ATOM   1030  H8   DG A  32     -53.866  52.509  -1.780  5.00  0.00           H  
ATOM   1031  H1'  DG A  32     -50.749  53.907  -3.670  5.00  0.00           H  
ATOM   1032  H2'  DG A  32     -51.731  52.008  -1.430  8.00  0.00           H  
ATOM   1033  H21  DG A  32     -53.064  58.421  -6.470  4.00  0.00           H  
ATOM   1034  H3'  DG A  32     -49.391  51.199  -1.800  9.00  0.00           H  
ATOM   1035  H22  DG A  32     -51.734  57.562  -5.780  5.00  0.00           H  
ATOM   1036  H4'  DG A  32     -49.689  51.409  -4.600  2.00  0.00           H  
ATOM   1037  H5'  DG A  32     -51.034  49.429  -4.360  1.00  0.00           H  
ATOM   1038 H2''  DG A  32     -50.798  53.427  -1.240  8.00  0.00           H  
ATOM   1039 H5''  DG A  32     -49.623  49.382  -3.330  5.00  0.00           H  
ATOM   1040  P    DG A  33     -47.329  52.965  -1.840  1.00  0.00           P  
ATOM   1041  C5'  DG A  33     -45.565  53.799  -3.710  1.00  0.00           C  
ATOM   1042  O5'  DG A  33     -46.266  54.072  -2.440  3.00  0.00           O  
ATOM   1043  C4'  DG A  33     -44.890  54.978  -4.310  7.00  0.00           C  
ATOM   1044  O4'  DG A  33     -45.978  55.946  -4.450  6.00  0.00           O  
ATOM   1045  C3'  DG A  33     -43.754  55.722  -3.470  0.00  0.00           C  
ATOM   1046  O3'  DG A  33     -43.182  55.058  -2.360  3.00  0.00           O  
ATOM   1047  C2'  DG A  33     -44.434  56.986  -3.060  5.00  0.00           C  
ATOM   1048  C1'  DG A  33     -45.502  57.225  -4.030  3.00  0.00           C  
ATOM   1049  N1   DG A  33     -49.950  57.724  -1.420  1.00  0.00           N  
ATOM   1050  C2   DG A  33     -49.020  56.771  -1.280  1.00  0.00           C  
ATOM   1051  N2   DG A  33     -49.352  55.735  -0.560  0.00  0.00           N  
ATOM   1052  N3   DG A  33     -47.841  56.785  -1.970  8.00  0.00           N  
ATOM   1053  C4   DG A  33     -47.668  57.904  -2.770  1.00  0.00           C  
ATOM   1054  C5   DG A  33     -48.547  58.935  -2.900  5.00  0.00           C  
ATOM   1055  C6   DG A  33     -49.741  58.867  -2.180  6.00  0.00           C  
ATOM   1056  O6   DG A  33     -50.667  59.706  -2.210  3.00  0.00           O  
ATOM   1057  N7   DG A  33     -48.076  59.780  -3.910  1.00  0.00           N  
ATOM   1058  C8   DG A  33     -46.900  59.300  -4.300  2.00  0.00           C  
ATOM   1059  N9   DG A  33     -46.579  58.157  -3.660  1.00  0.00           N  
ATOM   1060  OP1  DG A  33     -46.565  51.709  -1.920  9.00  0.00           O  
ATOM   1061  OP2  DG A  33     -47.588  53.542  -0.460  1.00  0.00           O1-
ATOM   1062  H1   DG A  33     -50.885  57.631  -1.050  7.00  0.00           H  
ATOM   1063  H8   DG A  33     -46.413  59.735  -5.180  7.00  0.00           H  
ATOM   1064  H1'  DG A  33     -45.001  57.620  -4.920  7.00  0.00           H  
ATOM   1065  H2'  DG A  33     -44.788  56.947  -2.040  7.00  0.00           H  
ATOM   1066  H21  DG A  33     -50.332  55.578  -0.220  2.00  0.00           H  
ATOM   1067  H3'  DG A  33     -42.896  55.815  -4.180  5.00  0.00           H  
ATOM   1068  H22  DG A  33     -48.736  55.002  -0.540  8.00  0.00           H  
ATOM   1069  H4'  DG A  33     -44.579  54.782  -5.340  8.00  0.00           H  
ATOM   1070  H5'  DG A  33     -46.297  53.449  -4.430  3.00  0.00           H  
ATOM   1071 H2''  DG A  33     -43.708  57.773  -3.140  4.00  0.00           H  
ATOM   1072 H5''  DG A  33     -44.865  53.047  -3.520  8.00  0.00           H  
ATOM   1073  P    DT A  34     -41.768  54.274  -2.460  3.00  0.00           P  
ATOM   1074  C5'  DT A  34     -40.197  53.930  -0.310  5.00  0.00           C  
ATOM   1075  O5'  DT A  34     -40.850  54.885  -1.220  9.00  0.00           O  
ATOM   1076  C4'  DT A  34     -39.266  54.667   0.560  3.00  0.00           C  
ATOM   1077  O4'  DT A  34     -38.799  53.650   1.510  3.00  0.00           O  
ATOM   1078  C3'  DT A  34     -37.971  55.338   0.100  7.00  0.00           C  
ATOM   1079  O3'  DT A  34     -38.140  56.693   0.230  1.00  0.00           O  
ATOM   1080  C2'  DT A  34     -36.896  54.873   1.070  9.00  0.00           C  
ATOM   1081  C1'  DT A  34     -37.628  54.075   2.180  3.00  0.00           C  
ATOM   1082  N1   DT A  34     -36.888  52.799   2.630  1.00  0.00           N  
ATOM   1083  C2   DT A  34     -36.180  52.980   3.850  0.00  0.00           C  
ATOM   1084  O2   DT A  34     -36.248  53.963   4.630  7.00  0.00           O  
ATOM   1085  N3   DT A  34     -35.483  51.925   4.260  8.00  0.00           N  
ATOM   1086  C4   DT A  34     -35.172  50.788   3.540  0.00  0.00           C  
ATOM   1087  O4   DT A  34     -34.372  49.994   4.000  9.00  0.00           O  
ATOM   1088  C5   DT A  34     -35.796  50.735   2.210  5.00  0.00           C  
ATOM   1089  C6   DT A  34     -36.611  51.726   1.800  8.00  0.00           C  
ATOM   1090  C7   DT A  34     -35.714  49.397   1.450  7.00  0.00           C  
ATOM   1091  OP1  DT A  34     -41.107  54.614  -3.750  2.00  0.00           O  
ATOM   1092  OP2  DT A  34     -42.094  52.819  -2.130  5.00  0.00           O1-
ATOM   1093  H3   DT A  34     -35.033  52.069   5.200  5.00  0.00           H  
ATOM   1094  H6   DT A  34     -37.153  51.647   0.890  8.00  0.00           H  
ATOM   1095  H1'  DT A  34     -37.866  54.709   3.060  2.00  0.00           H  
ATOM   1096  H2'  DT A  34     -36.396  54.070   0.570  5.00  0.00           H  
ATOM   1097  H3'  DT A  34     -37.574  55.049  -0.870  2.00  0.00           H  
ATOM   1098  H4'  DT A  34     -39.817  55.508   1.060  5.00  0.00           H  
ATOM   1099  H5'  DT A  34     -39.605  53.173  -0.850  7.00  0.00           H  
ATOM   1100  H71  DT A  34     -35.910  49.545   0.410  5.00  0.00           H  
ATOM   1101  H72  DT A  34     -34.682  49.001   1.560  1.00  0.00           H  
ATOM   1102  H73  DT A  34     -36.368  48.718   2.020  3.00  0.00           H  
ATOM   1103 H2''  DT A  34     -36.149  55.557   1.420  5.00  0.00           H  
ATOM   1104 H5''  DT A  34     -40.943  53.400   0.210  3.00  0.00           H  
ATOM   1105  P    DT A  35     -37.199  57.766  -0.400  5.00  0.00           P  
ATOM   1106  C5'  DT A  35     -36.110  58.580   1.870  4.00  0.00           C  
ATOM   1107  O5'  DT A  35     -35.996  57.888   0.620  3.00  0.00           O  
ATOM   1108  C4'  DT A  35     -34.753  59.046   2.410  4.00  0.00           C  
ATOM   1109  O4'  DT A  35     -34.229  57.901   3.080  0.00  0.00           O  
ATOM   1110  C3'  DT A  35     -33.693  59.576   1.420  1.00  0.00           C  
ATOM   1111  O3'  DT A  35     -33.120  60.702   2.120  5.00  0.00           O  
ATOM   1112  C2'  DT A  35     -32.880  58.359   1.150  6.00  0.00           C  
ATOM   1113  C1'  DT A  35     -32.889  57.756   2.560  6.00  0.00           C  
ATOM   1114  N1   DT A  35     -32.356  56.319   2.640  5.00  0.00           N  
ATOM   1115  C2   DT A  35     -31.425  56.026   3.640  2.00  0.00           C  
ATOM   1116  O2   DT A  35     -30.890  56.870   4.380  5.00  0.00           O  
ATOM   1117  N3   DT A  35     -31.049  54.701   3.740  8.00  0.00           N  
ATOM   1118  C4   DT A  35     -31.527  53.663   2.950  1.00  0.00           C  
ATOM   1119  O4   DT A  35     -31.092  52.508   3.190  5.00  0.00           O  
ATOM   1120  C5   DT A  35     -32.375  54.024   1.860  7.00  0.00           C  
ATOM   1121  C6   DT A  35     -32.782  55.292   1.750  0.00  0.00           C  
ATOM   1122  C7   DT A  35     -32.753  52.945   0.810  9.00  0.00           C  
ATOM   1123  OP1  DT A  35     -37.913  59.075  -0.370  3.00  0.00           O  
ATOM   1124  OP2  DT A  35     -36.586  57.228  -1.620  8.00  0.00           O1-
ATOM   1125  H3   DT A  35     -30.265  54.447   4.390  7.00  0.00           H  
ATOM   1126  H6   DT A  35     -33.357  55.566   0.910  3.00  0.00           H  
ATOM   1127  H1'  DT A  35     -32.170  58.307   3.200  3.00  0.00           H  
ATOM   1128  H2'  DT A  35     -33.404  57.754   0.390  1.00  0.00           H  
ATOM   1129  H3'  DT A  35     -34.193  59.856   0.470  9.00  0.00           H  
ATOM   1130  H4'  DT A  35     -34.996  59.809   3.160  8.00  0.00           H  
ATOM   1131  H5'  DT A  35     -36.653  57.889   2.590  3.00  0.00           H  
ATOM   1132  H71  DT A  35     -33.126  53.466  -0.030  3.00  0.00           H  
ATOM   1133  H72  DT A  35     -31.956  52.304   0.610  3.00  0.00           H  
ATOM   1134  H73  DT A  35     -33.503  52.298   1.190  2.00  0.00           H  
ATOM   1135 H2''  DT A  35     -31.847  58.597   0.850  0.00  0.00           H  
ATOM   1136 H5''  DT A  35     -36.775  59.452   1.820  2.00  0.00           H  
ATOM   1137  P    DA A  36     -32.368  61.803   1.210  6.00  0.00           P  
ATOM   1138  C5'  DA A  36     -29.915  61.467   2.330  1.00  0.00           C  
ATOM   1139  O5'  DA A  36     -30.781  61.366   1.210  5.00  0.00           O  
ATOM   1140  C4'  DA A  36     -28.795  60.397   2.260  3.00  0.00           C  
ATOM   1141  O4'  DA A  36     -29.305  59.049   2.440  5.00  0.00           O  
ATOM   1142  C3'  DA A  36     -28.043  60.455   0.960  1.00  0.00           C  
ATOM   1143  O3'  DA A  36     -26.655  60.564   1.160  9.00  0.00           O  
ATOM   1144  C2'  DA A  36     -28.235  59.145   0.350  1.00  0.00           C  
ATOM   1145  C1'  DA A  36     -28.356  58.327   1.720  7.00  0.00           C  
ATOM   1146  N1   DA A  36     -26.905  53.683   3.430  6.00  0.00           N  
ATOM   1147  C2   DA A  36     -26.513  54.908   3.840  8.00  0.00           C  
ATOM   1148  N3   DA A  36     -26.871  56.083   3.370  2.00  0.00           N  
ATOM   1149  C4   DA A  36     -27.868  55.959   2.390  6.00  0.00           C  
ATOM   1150  C5   DA A  36     -28.348  54.765   1.860  0.00  0.00           C  
ATOM   1151  C6   DA A  36     -27.845  53.615   2.530  1.00  0.00           C  
ATOM   1152  N6   DA A  36     -28.216  52.395   2.180  1.00  0.00           N  
ATOM   1153  N7   DA A  36     -29.117  54.941   0.730  5.00  0.00           N  
ATOM   1154  C8   DA A  36     -29.223  56.252   0.660  7.00  0.00           C  
ATOM   1155  N9   DA A  36     -28.546  56.937   1.660  3.00  0.00           N  
ATOM   1156  OP1  DA A  36     -32.461  63.033   1.940  0.00  0.00           O  
ATOM   1157  OP2  DA A  36     -32.883  61.755  -0.200  0.00  0.00           O1-
ATOM   1158  H2   DA A  36     -25.874  55.040   4.720  2.00  0.00           H  
ATOM   1159  H8   DA A  36     -29.829  56.737  -0.100  5.00  0.00           H  
ATOM   1160  H1'  DA A  36     -27.401  58.401   2.320  4.00  0.00           H  
ATOM   1161  H2'  DA A  36     -29.137  58.989  -0.230  9.00  0.00           H  
ATOM   1162  H3'  DA A  36     -28.506  61.254   0.400  6.00  0.00           H  
ATOM   1163  H4'  DA A  36     -28.110  60.642   3.210  3.00  0.00           H  
ATOM   1164  H5'  DA A  36     -30.497  61.311   3.250  0.00  0.00           H  
ATOM   1165  H61  DA A  36     -27.760  51.602   2.630  8.00  0.00           H  
ATOM   1166  H62  DA A  36     -28.828  52.255   1.400  1.00  0.00           H  
ATOM   1167 H2''  DA A  36     -27.402  58.810  -0.280  9.00  0.00           H  
ATOM   1168 H5''  DA A  36     -29.615  62.490   2.450  1.00  0.00           H  
ATOM   1169  P    DG A  37     -25.832  61.864   0.710  9.00  0.00           P  
ATOM   1170  C5'  DG A  37     -24.230  61.521   2.770  6.00  0.00           C  
ATOM   1171  O5'  DG A  37     -24.412  61.558   1.340  8.00  0.00           O  
ATOM   1172  C4'  DG A  37     -23.127  60.505   3.180  3.00  0.00           C  
ATOM   1173  O4'  DG A  37     -23.679  59.223   3.160  1.00  0.00           O  
ATOM   1174  C3'  DG A  37     -21.771  60.411   2.370  5.00  0.00           C  
ATOM   1175  O3'  DG A  37     -20.643  60.319   3.220  8.00  0.00           O  
ATOM   1176  C2'  DG A  37     -21.982  59.165   1.540  3.00  0.00           C  
ATOM   1177  C1'  DG A  37     -22.861  58.241   2.490  8.00  0.00           C  
ATOM   1178  N1   DG A  37     -23.780  53.292   2.070  3.00  0.00           N  
ATOM   1179  C2   DG A  37     -22.908  53.943   2.790  1.00  0.00           C  
ATOM   1180  N2   DG A  37     -21.986  53.313   3.440  4.00  0.00           N  
ATOM   1181  N3   DG A  37     -22.703  55.276   2.840  3.00  0.00           N  
ATOM   1182  C4   DG A  37     -23.574  55.889   2.000  5.00  0.00           C  
ATOM   1183  C5   DG A  37     -24.488  55.380   1.130  3.00  0.00           C  
ATOM   1184  C6   DG A  37     -24.619  53.979   1.110  9.00  0.00           C  
ATOM   1185  O6   DG A  37     -25.384  53.295   0.450  0.00  0.00           O  
ATOM   1186  N7   DG A  37     -25.119  56.366   0.330  4.00  0.00           N  
ATOM   1187  C8   DG A  37     -24.538  57.431   0.780  0.00  0.00           C  
ATOM   1188  N9   DG A  37     -23.660  57.220   1.840  0.00  0.00           N  
ATOM   1189  OP1  DG A  37     -26.406  63.118   1.290  8.00  0.00           O  
ATOM   1190  OP2  DG A  37     -25.674  61.725  -0.700  4.00  0.00           O1-
ATOM   1191  H1   DG A  37     -23.899  52.246   2.190  4.00  0.00           H  
ATOM   1192  H8   DG A  37     -24.682  58.510   0.430  9.00  0.00           H  
ATOM   1193  H1'  DG A  37     -22.169  57.770   3.220  4.00  0.00           H  
ATOM   1194  H2'  DG A  37     -22.579  59.460   0.700  5.00  0.00           H  
ATOM   1195  H21  DG A  37     -22.002  52.325   3.420  4.00  0.00           H  
ATOM   1196  H3'  DG A  37     -21.661  61.323   1.830  7.00  0.00           H  
ATOM   1197  H22  DG A  37     -21.339  53.825   3.990  7.00  0.00           H  
ATOM   1198  H4'  DG A  37     -22.900  60.723   4.260  0.00  0.00           H  
ATOM   1199  H5'  DG A  37     -25.139  61.140   3.250  6.00  0.00           H  
ATOM   1200 H2''  DG A  37     -21.006  58.724   1.300  6.00  0.00           H  
ATOM   1201 H5''  DG A  37     -24.076  62.439   3.210  5.00  0.00           H  
ATOM   1202  P    DG A  38     -19.101  60.378   2.570  0.00  0.00           P  
ATOM   1203  C5'  DG A  38     -18.784  57.885   3.610  0.00  0.00           C  
ATOM   1204  O5'  DG A  38     -18.907  58.750   2.410  7.00  0.00           O  
ATOM   1205  C4'  DG A  38     -18.506  56.415   3.160  0.00  0.00           C  
ATOM   1206  O4'  DG A  38     -19.611  55.767   2.520  9.00  0.00           O  
ATOM   1207  C3'  DG A  38     -17.303  56.290   2.170  6.00  0.00           C  
ATOM   1208  O3'  DG A  38     -16.364  55.383   2.800  9.00  0.00           O  
ATOM   1209  C2'  DG A  38     -17.910  55.590   0.950  3.00  0.00           C  
ATOM   1210  C1'  DG A  38     -19.096  54.848   1.550  1.00  0.00           C  
ATOM   1211  N1   DG A  38     -22.011  51.249  -0.700  0.00  0.00           N  
ATOM   1212  C2   DG A  38     -21.015  51.135   0.230  3.00  0.00           C  
ATOM   1213  N2   DG A  38     -20.687  49.972   0.650  5.00  0.00           N  
ATOM   1214  N3   DG A  38     -20.245  52.169   0.750  5.00  0.00           N  
ATOM   1215  C4   DG A  38     -20.660  53.404   0.250  0.00  0.00           C  
ATOM   1216  C5   DG A  38     -21.681  53.642  -0.650  9.00  0.00           C  
ATOM   1217  C6   DG A  38     -22.389  52.517  -1.190  8.00  0.00           C  
ATOM   1218  O6   DG A  38     -23.286  52.567  -2.100  5.00  0.00           O  
ATOM   1219  N7   DG A  38     -21.724  55.079  -0.860  7.00  0.00           N  
ATOM   1220  C8   DG A  38     -20.866  55.553  -0.070  0.00  0.00           C  
ATOM   1221  N9   DG A  38     -20.181  54.590   0.660  6.00  0.00           N  
ATOM   1222  OP1  DG A  38     -18.242  60.983   3.610  3.00  0.00           O  
ATOM   1223  OP2  DG A  38     -19.082  60.998   1.270  4.00  0.00           O1-
ATOM   1224  H1   DG A  38     -22.497  50.429  -0.950  9.00  0.00           H  
ATOM   1225  H8   DG A  38     -20.573  56.577   0.070  7.00  0.00           H  
ATOM   1226  H1'  DG A  38     -18.861  53.932   2.050  7.00  0.00           H  
ATOM   1227  H2'  DG A  38     -18.355  56.370   0.280  8.00  0.00           H  
ATOM   1228  H21  DG A  38     -21.264  49.097   0.340  8.00  0.00           H  
ATOM   1229  H3'  DG A  38     -16.821  57.257   2.060  7.00  0.00           H  
ATOM   1230  H22  DG A  38     -19.920  49.876   1.270  0.00  0.00           H  
ATOM   1231  H4'  DG A  38     -18.329  55.861   4.050  5.00  0.00           H  
ATOM   1232  H5'  DG A  38     -19.551  57.991   4.420  9.00  0.00           H  
ATOM   1233 H2''  DG A  38     -17.136  54.959   0.460  9.00  0.00           H  
ATOM   1234 H5''  DG A  38     -17.904  58.206   4.180  9.00  0.00           H  
ATOM   1235  P    DG A  39     -14.947  55.023   2.140  5.00  0.00           P  
ATOM   1236  C5'  DG A  39     -15.151  52.450   2.100  2.00  0.00           C  
ATOM   1237  O5'  DG A  39     -15.097  53.655   1.410  0.00  0.00           O  
ATOM   1238  C4'  DG A  39     -15.621  51.227   1.340  9.00  0.00           C  
ATOM   1239  O4'  DG A  39     -16.846  51.658   0.660  6.00  0.00           O  
ATOM   1240  C3'  DG A  39     -14.686  50.835   0.190  3.00  0.00           C  
ATOM   1241  O3'  DG A  39     -14.303  49.453   0.440  4.00  0.00           O  
ATOM   1242  C2'  DG A  39     -15.521  51.024  -1.070  3.00  0.00           C  
ATOM   1243  C1'  DG A  39     -16.899  50.902  -0.530  1.00  0.00           C  
ATOM   1244  N1   DG A  39     -20.467  49.887  -4.040  0.00  0.00           N  
ATOM   1245  C2   DG A  39     -19.790  49.075  -3.220  9.00  0.00           C  
ATOM   1246  N2   DG A  39     -20.037  47.809  -3.190  7.00  0.00           N  
ATOM   1247  N3   DG A  39     -18.889  49.497  -2.410  4.00  0.00           N  
ATOM   1248  C4   DG A  39     -18.776  50.852  -2.330  1.00  0.00           C  
ATOM   1249  C5   DG A  39     -19.337  51.796  -3.150  5.00  0.00           C  
ATOM   1250  C6   DG A  39     -20.186  51.256  -4.160  2.00  0.00           C  
ATOM   1251  O6   DG A  39     -20.775  51.757  -5.130  5.00  0.00           O  
ATOM   1252  N7   DG A  39     -18.856  53.071  -2.880  6.00  0.00           N  
ATOM   1253  C8   DG A  39     -17.987  52.858  -1.930  0.00  0.00           C  
ATOM   1254  N9   DG A  39     -17.860  51.521  -1.510  9.00  0.00           N  
ATOM   1255  OP1  DG A  39     -13.920  54.805   3.180  3.00  0.00           O  
ATOM   1256  OP2  DG A  39     -14.608  56.103   1.160  9.00  0.00           O1-
ATOM   1257  H1   DG A  39     -21.219  49.468  -4.620  5.00  0.00           H  
ATOM   1258  H8   DG A  39     -17.324  53.667  -1.500  4.00  0.00           H  
ATOM   1259  H1'  DG A  39     -17.237  49.841  -0.260  6.00  0.00           H  
ATOM   1260  H2'  DG A  39     -15.282  52.037  -1.510  8.00  0.00           H  
ATOM   1261  H21  DG A  39     -20.853  47.413  -3.640  1.00  0.00           H  
ATOM   1262  H3'  DG A  39     -13.785  51.446   0.160  9.00  0.00           H  
ATOM   1263  H22  DG A  39     -19.391  47.306  -2.680  1.00  0.00           H  
ATOM   1264  H4'  DG A  39     -15.864  50.320   1.930  1.00  0.00           H  
ATOM   1265  H5'  DG A  39     -15.799  52.573   2.970  5.00  0.00           H  
ATOM   1266 H2''  DG A  39     -15.307  50.221  -1.800  8.00  0.00           H  
ATOM   1267 H5''  DG A  39     -14.195  52.224   2.520  2.00  0.00           H  
ATOM   1268  P    DT A  40     -13.343  48.642  -0.430  2.00  0.00           P  
ATOM   1269  C5'  DT A  40     -15.389  47.021  -0.540  3.00  0.00           C  
ATOM   1270  O5'  DT A  40     -14.440  47.887  -1.270  4.00  0.00           O  
ATOM   1271  C4'  DT A  40     -16.177  46.044  -1.440  2.00  0.00           C  
ATOM   1272  O4'  DT A  40     -17.104  46.739  -2.260  9.00  0.00           O  
ATOM   1273  C3'  DT A  40     -15.249  45.301  -2.340  7.00  0.00           C  
ATOM   1274  O3'  DT A  40     -15.606  43.908  -2.120  2.00  0.00           O  
ATOM   1275  C2'  DT A  40     -15.430  45.988  -3.700  3.00  0.00           C  
ATOM   1276  C1'  DT A  40     -16.921  46.497  -3.670  9.00  0.00           C  
ATOM   1277  N1   DT A  40     -17.102  47.716  -4.550  5.00  0.00           N  
ATOM   1278  C2   DT A  40     -17.886  47.518  -5.680  6.00  0.00           C  
ATOM   1279  O2   DT A  40     -18.512  46.478  -5.930  9.00  0.00           O  
ATOM   1280  N3   DT A  40     -17.932  48.617  -6.510  2.00  0.00           N  
ATOM   1281  C4   DT A  40     -17.440  49.897  -6.190  0.00  0.00           C  
ATOM   1282  O4   DT A  40     -17.610  50.812  -6.980  3.00  0.00           O  
ATOM   1283  C5   DT A  40     -16.561  49.960  -5.100  6.00  0.00           C  
ATOM   1284  C6   DT A  40     -16.458  48.897  -4.260  7.00  0.00           C  
ATOM   1285  C7   DT A  40     -15.843  51.154  -4.780  3.00  0.00           C  
ATOM   1286  OP1  DT A  40     -12.820  47.569   0.410  6.00  0.00           O  
ATOM   1287  OP2  DT A  40     -12.502  49.504  -1.270  7.00  0.00           O1-
ATOM   1288  H3   DT A  40     -18.563  48.479  -7.320  5.00  0.00           H  
ATOM   1289  H6   DT A  40     -15.764  48.879  -3.390  1.00  0.00           H  
ATOM   1290  H1'  DT A  40     -17.505  45.619  -3.960  7.00  0.00           H  
ATOM   1291  H2'  DT A  40     -14.745  46.852  -3.790  1.00  0.00           H  
ATOM   1292  H3'  DT A  40     -14.157  45.449  -2.150  9.00  0.00           H  
ATOM   1293  H4'  DT A  40     -16.643  45.285  -0.830  3.00  0.00           H  
ATOM   1294  H5'  DT A  40     -16.033  47.651   0.030  9.00  0.00           H  
ATOM   1295  H71  DT A  40     -15.162  50.914  -4.010  8.00  0.00           H  
ATOM   1296  H72  DT A  40     -15.216  51.492  -5.620  0.00  0.00           H  
ATOM   1297  H73  DT A  40     -16.488  52.019  -4.650  6.00  0.00           H  
ATOM   1298 H2''  DT A  40     -15.165  45.354  -4.580  8.00  0.00           H  
ATOM   1299 H5''  DT A  40     -14.861  46.493   0.230  9.00  0.00           H  
ATOM   1300  P    DT A  41     -14.875  42.776  -3.000  5.00  0.00           P  
ATOM   1301  C5'  DT A  41     -17.108  42.362  -4.380  9.00  0.00           C  
ATOM   1302  O5'  DT A  41     -15.670  42.679  -4.350  8.00  0.00           O  
ATOM   1303  C4'  DT A  41     -17.849  42.446  -5.730  6.00  0.00           C  
ATOM   1304  O4'  DT A  41     -17.663  43.805  -6.310  2.00  0.00           O  
ATOM   1305  C3'  DT A  41     -17.289  41.514  -6.880  8.00  0.00           C  
ATOM   1306  O3'  DT A  41     -18.386  40.796  -7.400  3.00  0.00           O  
ATOM   1307  C2'  DT A  41     -16.643  42.452  -7.910  4.00  0.00           C  
ATOM   1308  C1'  DT A  41     -17.552  43.619  -7.650  0.00  0.00           C  
ATOM   1309  N1   DT A  41     -17.003  44.883  -8.250  8.00  0.00           N  
ATOM   1310  C2   DT A  41     -17.830  45.618  -9.120  6.00  0.00           C  
ATOM   1311  O2   DT A  41     -18.834  45.139  -9.750  2.00  0.00           O  
ATOM   1312  N3   DT A  41     -17.521  46.940  -9.370  0.00  0.00           N  
ATOM   1313  C4   DT A  41     -16.299  47.503  -8.940  5.00  0.00           C  
ATOM   1314  O4   DT A  41     -15.881  48.521  -9.450  4.00  0.00           O  
ATOM   1315  C5   DT A  41     -15.500  46.640  -8.020  4.00  0.00           C  
ATOM   1316  C6   DT A  41     -15.854  45.370  -7.680  5.00  0.00           C  
ATOM   1317  C7   DT A  41     -14.130  47.202  -7.480  9.00  0.00           C  
ATOM   1318  OP1  DT A  41     -15.045  41.533  -2.260  6.00  0.00           O  
ATOM   1319  OP2  DT A  41     -13.517  43.151  -3.430  1.00  0.00           O1-
ATOM   1320  H3   DT A  41     -18.021  47.486 -10.050  5.00  0.00           H  
ATOM   1321  H6   DT A  41     -15.305  44.684  -7.070  6.00  0.00           H  
ATOM   1322  H1'  DT A  41     -18.425  43.430  -8.220  4.00  0.00           H  
ATOM   1323  H2'  DT A  41     -15.606  42.634  -7.560  5.00  0.00           H  
ATOM   1324  H3'  DT A  41     -16.599  40.869  -6.370  3.00  0.00           H  
ATOM   1325  H4'  DT A  41     -18.868  42.296  -5.560  7.00  0.00           H  
ATOM   1326  H5'  DT A  41     -17.562  43.090  -3.720  4.00  0.00           H  
ATOM   1327  H71  DT A  41     -14.257  48.214  -7.120  9.00  0.00           H  
ATOM   1328  H72  DT A  41     -13.618  46.568  -6.850  0.00  0.00           H  
ATOM   1329  H73  DT A  41     -13.556  47.286  -8.410  8.00  0.00           H  
ATOM   1330 H2''  DT A  41     -16.636  41.999  -8.810  1.00  0.00           H  
ATOM   1331 H5''  DT A  41     -17.238  41.312  -3.940  0.00  0.00           H  
ATOM   1332  P    DA A  42     -18.208  39.638  -8.560  1.00  0.00           P  
ATOM   1333  C5'  DA A  42     -20.085  40.766 -10.000  3.00  0.00           C  
ATOM   1334  O5'  DA A  42     -18.690  40.393  -9.850  8.00  0.00           O  
ATOM   1335  C4'  DA A  42     -20.535  41.353 -11.360  0.00  0.00           C  
ATOM   1336  O4'  DA A  42     -20.122  42.645 -11.670  0.00  0.00           O  
ATOM   1337  C3'  DA A  42     -20.067  40.442 -12.520  0.00  0.00           C  
ATOM   1338  O3'  DA A  42     -21.005  40.412 -13.600  8.00  0.00           O  
ATOM   1339  C2'  DA A  42     -18.799  41.182 -12.980  2.00  0.00           C  
ATOM   1340  C1'  DA A  42     -19.121  42.604 -12.700  8.00  0.00           C  
ATOM   1341  N1   DA A  42     -16.694  46.846 -13.640  3.00  0.00           N  
ATOM   1342  C2   DA A  42     -17.797  46.340 -14.140  4.00  0.00           C  
ATOM   1343  N3   DA A  42     -18.388  45.277 -13.640  8.00  0.00           N  
ATOM   1344  C4   DA A  42     -17.621  44.526 -12.800  4.00  0.00           C  
ATOM   1345  C5   DA A  42     -16.422  44.909 -12.250  4.00  0.00           C  
ATOM   1346  C6   DA A  42     -16.030  46.198 -12.660  9.00  0.00           C  
ATOM   1347  N6   DA A  42     -15.010  46.854 -12.210  1.00  0.00           N  
ATOM   1348  N7   DA A  42     -15.905  43.903 -11.460  8.00  0.00           N  
ATOM   1349  C8   DA A  42     -16.763  42.954 -11.580  3.00  0.00           C  
ATOM   1350  N9   DA A  42     -17.900  43.321 -12.300  9.00  0.00           N  
ATOM   1351  OP1  DA A  42     -19.282  38.663  -8.270  6.00  0.00           O  
ATOM   1352  OP2  DA A  42     -16.761  39.240  -8.830  5.00  0.00           O1-
ATOM   1353  H2   DA A  42     -18.315  46.896 -14.900  1.00  0.00           H  
ATOM   1354  H8   DA A  42     -16.712  41.969 -11.030  0.00  0.00           H  
ATOM   1355  H1'  DA A  42     -19.541  43.011 -13.660  7.00  0.00           H  
ATOM   1356  H2'  DA A  42     -17.941  40.804 -12.340  5.00  0.00           H  
ATOM   1357  H3'  DA A  42     -19.865  39.426 -12.160  7.00  0.00           H  
ATOM   1358  H4'  DA A  42     -21.619  41.368 -11.340  5.00  0.00           H  
ATOM   1359  H5'  DA A  42     -20.320  41.628  -9.310  6.00  0.00           H  
ATOM   1360  H61  DA A  42     -14.805  47.669 -12.870  0.00  0.00           H  
ATOM   1361  H62  DA A  42     -14.410  46.370 -11.560  5.00  0.00           H  
ATOM   1362 H2''  DA A  42     -18.557  41.097 -14.060  9.00  0.00           H  
ATOM   1363 H5''  DA A  42     -20.698  39.904  -9.690  1.00  0.00           H  
ATOM   1364  P    DG A  43     -20.922  39.304 -14.780  5.00  0.00           P  
ATOM   1365  C5'  DG A  43     -20.594  41.262 -16.530  2.00  0.00           C  
ATOM   1366  O5'  DG A  43     -20.050  40.065 -15.940  7.00  0.00           O  
ATOM   1367  C4'  DG A  43     -19.478  41.996 -17.230  9.00  0.00           C  
ATOM   1368  O4'  DG A  43     -18.613  42.746 -16.320  6.00  0.00           O  
ATOM   1369  C3'  DG A  43     -18.594  41.170 -18.150  3.00  0.00           C  
ATOM   1370  O3'  DG A  43     -18.453  41.764 -19.450  1.00  0.00           O  
ATOM   1371  C2'  DG A  43     -17.249  41.353 -17.390  6.00  0.00           C  
ATOM   1372  C1'  DG A  43     -17.330  42.751 -16.930  2.00  0.00           C  
ATOM   1373  N1   DG A  43     -14.707  46.948 -16.160  5.00  0.00           N  
ATOM   1374  C2   DG A  43     -15.768  46.704 -17.000  1.00  0.00           C  
ATOM   1375  N2   DG A  43     -16.242  47.766 -17.560  9.00  0.00           N  
ATOM   1376  N3   DG A  43     -16.352  45.506 -17.160  6.00  0.00           N  
ATOM   1377  C4   DG A  43     -15.754  44.555 -16.370  3.00  0.00           C  
ATOM   1378  C5   DG A  43     -14.652  44.666 -15.560  8.00  0.00           C  
ATOM   1379  C6   DG A  43     -14.049  45.941 -15.430  9.00  0.00           C  
ATOM   1380  O6   DG A  43     -13.045  46.246 -14.810  2.00  0.00           O  
ATOM   1381  N7   DG A  43     -14.390  43.495 -14.830  4.00  0.00           N  
ATOM   1382  C8   DG A  43     -15.394  42.698 -15.210  2.00  0.00           C  
ATOM   1383  N9   DG A  43     -16.222  43.283 -16.120  5.00  0.00           N  
ATOM   1384  OP1  DG A  43     -22.299  39.249 -15.410  9.00  0.00           O  
ATOM   1385  OP2  DG A  43     -20.258  38.038 -14.370  9.00  0.00           O1-
ATOM   1386  H1   DG A  43     -14.401  47.904 -16.210  2.00  0.00           H  
ATOM   1387  H8   DG A  43     -15.470  41.659 -14.890  3.00  0.00           H  
ATOM   1388  H1'  DG A  43     -17.413  43.314 -17.780  9.00  0.00           H  
ATOM   1389  H2'  DG A  43     -17.254  40.776 -16.500  6.00  0.00           H  
ATOM   1390  H21  DG A  43     -15.721  48.692 -17.450  5.00  0.00           H  
ATOM   1391  H3'  DG A  43     -18.889  40.092 -18.240  0.00  0.00           H  
ATOM   1392  H22  DG A  43     -17.170  47.577 -17.840  7.00  0.00           H  
ATOM   1393  H4'  DG A  43     -19.928  42.717 -17.860  4.00  0.00           H  
ATOM   1394  H5'  DG A  43     -20.975  41.884 -15.780  8.00  0.00           H  
ATOM   1395 H2''  DG A  43     -16.351  41.213 -18.000  4.00  0.00           H  
ATOM   1396 H5''  DG A  43     -21.368  41.014 -17.220  7.00  0.00           H  
ATOM   1397  P    DG A  44     -18.925  41.052 -20.780  1.00  0.00           P  
ATOM   1398  C5'  DG A  44     -19.799  43.382 -21.800  4.00  0.00           C  
ATOM   1399  O5'  DG A  44     -18.796  42.264 -21.850  3.00  0.00           O  
ATOM   1400  C4'  DG A  44     -19.010  44.682 -21.820  2.00  0.00           C  
ATOM   1401  O4'  DG A  44     -18.022  44.662 -20.790  2.00  0.00           O  
ATOM   1402  C3'  DG A  44     -18.094  44.784 -23.090  0.00  0.00           C  
ATOM   1403  O3'  DG A  44     -18.406  46.027 -23.760  6.00  0.00           O  
ATOM   1404  C2'  DG A  44     -16.604  44.726 -22.670  5.00  0.00           C  
ATOM   1405  C1'  DG A  44     -16.804  45.207 -21.270  5.00  0.00           C  
ATOM   1406  N1   DG A  44     -12.594  46.877 -18.790  9.00  0.00           N  
ATOM   1407  C2   DG A  44     -13.265  47.450 -19.790  8.00  0.00           C  
ATOM   1408  N2   DG A  44     -12.939  48.665 -20.050  2.00  0.00           N  
ATOM   1409  N3   DG A  44     -14.342  46.827 -20.370  6.00  0.00           N  
ATOM   1410  C4   DG A  44     -14.579  45.596 -20.010  1.00  0.00           C  
ATOM   1411  C5   DG A  44     -13.875  44.862 -19.080  9.00  0.00           C  
ATOM   1412  C6   DG A  44     -12.755  45.529 -18.430  4.00  0.00           C  
ATOM   1413  O6   DG A  44     -12.003  44.998 -17.590  4.00  0.00           O  
ATOM   1414  N7   DG A  44     -14.366  43.583 -18.920  3.00  0.00           N  
ATOM   1415  C8   DG A  44     -15.326  43.553 -19.840  7.00  0.00           C  
ATOM   1416  N9   DG A  44     -15.636  44.797 -20.470  6.00  0.00           N  
ATOM   1417  OP1  DG A  44     -20.294  40.601 -20.670  3.00  0.00           O  
ATOM   1418  OP2  DG A  44     -17.902  40.067 -21.130  4.00  0.00           O1-
ATOM   1419  H1   DG A  44     -11.825  47.349 -18.370  5.00  0.00           H  
ATOM   1420  H8   DG A  44     -16.010  42.704 -19.930  8.00  0.00           H  
ATOM   1421  H1'  DG A  44     -16.864  46.269 -21.260  1.00  0.00           H  
ATOM   1422  H2'  DG A  44     -16.318  43.660 -22.810  2.00  0.00           H  
ATOM   1423  H21  DG A  44     -12.130  49.027 -19.510  9.00  0.00           H  
ATOM   1424  H3'  DG A  44     -18.343  43.929 -23.730  3.00  0.00           H  
ATOM   1425  H22  DG A  44     -13.534  49.354 -20.520  5.00  0.00           H  
ATOM   1426  H4'  DG A  44     -19.629  45.618 -21.700  6.00  0.00           H  
ATOM   1427  H5'  DG A  44     -20.454  43.300 -20.870  2.00  0.00           H  
ATOM   1428 H2''  DG A  44     -15.980  45.425 -23.270  4.00  0.00           H  
ATOM   1429 H5''  DG A  44     -20.324  43.401 -22.710  1.00  0.00           H  
ATOM   1430  P   DG3 A  45     -18.005  46.484 -25.280  1.00  0.00           P  
ATOM   1431  C5' DG3 A  45     -16.247  48.263 -24.530  2.00  0.00           C  
ATOM   1432  O5' DG3 A  45     -16.497  46.932 -25.070  6.00  0.00           O  
ATOM   1433  C4' DG3 A  45     -14.722  48.635 -24.490  5.00  0.00           C  
ATOM   1434  O4' DG3 A  45     -14.124  47.917 -23.490  2.00  0.00           O  
ATOM   1435  C3' DG3 A  45     -13.826  48.472 -25.780  6.00  0.00           C  
ATOM   1436  O3' DG3 A  45     -13.504  49.783 -26.270  5.00  0.00           O  
ATOM   1437  C2' DG3 A  45     -12.538  47.878 -25.140  2.00  0.00           C  
ATOM   1438  C1' DG3 A  45     -12.731  47.985 -23.650  3.00  0.00           C  
ATOM   1439  N1  DG3 A  45      -8.735  46.983 -20.740  1.00  0.00           N  
ATOM   1440  C2  DG3 A  45      -8.985  48.086 -21.550  2.00  0.00           C  
ATOM   1441  N2  DG3 A  45      -8.003  48.961 -21.600  7.00  0.00           N  
ATOM   1442  N3  DG3 A  45     -10.016  48.175 -22.360  2.00  0.00           N  
ATOM   1443  C4  DG3 A  45     -10.753  47.079 -22.280  4.00  0.00           C  
ATOM   1444  C5  DG3 A  45     -10.574  45.937 -21.550  6.00  0.00           C  
ATOM   1445  C6  DG3 A  45      -9.486  45.901 -20.620  4.00  0.00           C  
ATOM   1446  O6  DG3 A  45      -9.077  44.976 -19.950  5.00  0.00           O  
ATOM   1447  N7  DG3 A  45     -11.595  45.031 -21.720  3.00  0.00           N  
ATOM   1448  C8  DG3 A  45     -12.396  45.565 -22.520  6.00  0.00           C  
ATOM   1449  N9  DG3 A  45     -12.017  46.880 -22.870  8.00  0.00           N  
ATOM   1450  OP1 DG3 A  45     -18.916  47.604 -25.650  3.00  0.00           O  
ATOM   1451  OP2 DG3 A  45     -17.914  45.304 -26.080  5.00  0.00           O  
ATOM   1452 HO3' DG3 A  45     -12.750  49.659 -26.920  0.00  0.00           H  
ATOM   1453  H1  DG3 A  45      -7.941  46.995 -20.100  0.00  0.00           H  
ATOM   1454  H8  DG3 A  45     -13.348  45.151 -22.860  1.00  0.00           H  
ATOM   1455  H1' DG3 A  45     -12.369  48.950 -23.390  1.00  0.00           H  
ATOM   1456  H2' DG3 A  45     -12.515  46.868 -25.390  9.00  0.00           H  
ATOM   1457  H21 DG3 A  45      -7.160  48.831 -21.020  7.00  0.00           H  
ATOM   1458  H3' DG3 A  45     -14.352  47.865 -26.530  5.00  0.00           H  
ATOM   1459  H22 DG3 A  45      -8.193  49.731 -22.220  7.00  0.00           H  
ATOM   1460  H4' DG3 A  45     -14.655  49.660 -24.080  2.00  0.00           H  
ATOM   1461  H5' DG3 A  45     -16.762  48.306 -23.620  9.00  0.00           H  
ATOM   1462 H2'' DG3 A  45     -11.667  48.389 -25.450  5.00  0.00           H  
ATOM   1463 H5'' DG3 A  45     -16.789  49.015 -25.200  5.00  0.00           H  
ATOM   1464  C5' DC5 A  46      -1.862  48.445 -14.530  6.00  0.00           C  
ATOM   1465  O5' DC5 A  46      -3.003  47.868 -13.920  8.00  0.00           O  
ATOM   1466  C4' DC5 A  46      -2.056  49.028 -15.920  9.00  0.00           C  
ATOM   1467  O4' DC5 A  46      -2.572  48.031 -16.850  4.00  0.00           O  
ATOM   1468  C3' DC5 A  46      -3.059  50.217 -15.900  0.00  0.00           C  
ATOM   1469  O3' DC5 A  46      -2.704  51.163 -16.930  4.00  0.00           O  
ATOM   1470  C2' DC5 A  46      -4.362  49.502 -16.270  3.00  0.00           C  
ATOM   1471  C1' DC5 A  46      -3.902  48.418 -17.310  9.00  0.00           C  
ATOM   1472  N1  DC5 A  46      -4.887  47.299 -17.450  7.00  0.00           N  
ATOM   1473  C2  DC5 A  46      -5.890  47.355 -18.430  4.00  0.00           C  
ATOM   1474  O2  DC5 A  46      -5.933  48.194 -19.310  0.00  0.00           O  
ATOM   1475  N3  DC5 A  46      -6.960  46.490 -18.310  7.00  0.00           N  
ATOM   1476  C4  DC5 A  46      -6.921  45.530 -17.440  3.00  0.00           C  
ATOM   1477  N4  DC5 A  46      -7.868  44.643 -17.430  0.00  0.00           N  
ATOM   1478  C5  DC5 A  46      -5.886  45.397 -16.520  5.00  0.00           C  
ATOM   1479  C6  DC5 A  46      -4.910  46.279 -16.520  9.00  0.00           C  
ATOM   1480 HO5' DC5 A  46      -2.766  47.553 -13.050  3.00  0.00           H  
ATOM   1481  H5  DC5 A  46      -5.877  44.624 -15.790  2.00  0.00           H  
ATOM   1482  H6  DC5 A  46      -4.041  46.183 -15.920  8.00  0.00           H  
ATOM   1483  H1' DC5 A  46      -3.933  48.948 -18.270  3.00  0.00           H  
ATOM   1484  H2' DC5 A  46      -4.822  49.016 -15.380  6.00  0.00           H  
ATOM   1485  H3' DC5 A  46      -3.123  50.714 -14.900  7.00  0.00           H  
ATOM   1486  H4' DC5 A  46      -1.054  49.396 -16.150  5.00  0.00           H  
ATOM   1487  H41 DC5 A  46      -8.580  44.632 -18.120  2.00  0.00           H  
ATOM   1488  H5' DC5 A  46      -1.114  47.713 -14.590  9.00  0.00           H  
ATOM   1489  H42 DC5 A  46      -7.887  43.989 -16.750  3.00  0.00           H  
ATOM   1490 H2'' DC5 A  46      -5.053  50.166 -16.730  7.00  0.00           H  
ATOM   1491 H5'' DC5 A  46      -1.549  49.243 -13.800  1.00  0.00           H  
ATOM   1492  P    DC A  47      -3.073  52.677 -16.950  2.00  0.00           P  
ATOM   1493  C5'  DC A  47      -5.080  52.695 -18.630  9.00  0.00           C  
ATOM   1494  O5'  DC A  47      -4.643  52.782 -17.330  2.00  0.00           O  
ATOM   1495  C4'  DC A  47      -6.566  52.740 -19.030  3.00  0.00           C  
ATOM   1496  O4'  DC A  47      -7.300  51.471 -18.990  1.00  0.00           O  
ATOM   1497  C3'  DC A  47      -7.396  53.743 -18.140  8.00  0.00           C  
ATOM   1498  O3'  DC A  47      -8.176  54.507 -19.010  3.00  0.00           O  
ATOM   1499  C2'  DC A  47      -8.294  52.771 -17.390  4.00  0.00           C  
ATOM   1500  C1'  DC A  47      -8.525  51.659 -18.390  1.00  0.00           C  
ATOM   1501  N1   DC A  47      -8.931  50.393 -17.760  4.00  0.00           N  
ATOM   1502  C2   DC A  47     -10.108  49.790 -18.140  5.00  0.00           C  
ATOM   1503  O2   DC A  47     -10.769  50.225 -19.110  7.00  0.00           O  
ATOM   1504  N3   DC A  47     -10.514  48.578 -17.730  6.00  0.00           N  
ATOM   1505  C4   DC A  47      -9.752  48.023 -16.820  7.00  0.00           C  
ATOM   1506  N4   DC A  47      -9.905  46.776 -16.640  6.00  0.00           N  
ATOM   1507  C5   DC A  47      -8.536  48.670 -16.270  0.00  0.00           C  
ATOM   1508  C6   DC A  47      -8.167  49.866 -16.820  2.00  0.00           C  
ATOM   1509  OP1  DC A  47      -2.241  53.281 -18.050  7.00  0.00           O  
ATOM   1510  OP2  DC A  47      -2.797  53.232 -15.600  5.00  0.00           O1-
ATOM   1511  H5   DC A  47      -7.931  48.094 -15.530  8.00  0.00           H  
ATOM   1512  H6   DC A  47      -7.214  50.366 -16.640  2.00  0.00           H  
ATOM   1513  H1'  DC A  47      -9.282  52.093 -19.070  7.00  0.00           H  
ATOM   1514  H2'  DC A  47      -7.714  52.497 -16.480  2.00  0.00           H  
ATOM   1515  H3'  DC A  47      -6.633  54.330 -17.640  2.00  0.00           H  
ATOM   1516  H4'  DC A  47      -6.579  53.124 -20.020  0.00  0.00           H  
ATOM   1517  H41  DC A  47     -10.675  46.255 -17.000  2.00  0.00           H  
ATOM   1518  H5'  DC A  47      -4.563  51.755 -19.050  0.00  0.00           H  
ATOM   1519  H42  DC A  47      -9.341  46.397 -15.870  0.00  0.00           H  
ATOM   1520 H2''  DC A  47      -9.334  53.208 -17.020  0.00  0.00           H  
ATOM   1521 H5''  DC A  47      -4.600  53.582 -19.140  7.00  0.00           H  
ATOM   1522  P    DC A  48      -8.991  55.732 -18.640  3.00  0.00           P  
ATOM   1523  C5'  DC A  48     -11.303  55.052 -19.900  5.00  0.00           C  
ATOM   1524  O5'  DC A  48     -10.527  55.192 -18.650  9.00  0.00           O  
ATOM   1525  C4'  DC A  48     -12.713  54.328 -19.730  6.00  0.00           C  
ATOM   1526  O4'  DC A  48     -12.525  52.986 -19.250  5.00  0.00           O  
ATOM   1527  C3'  DC A  48     -13.676  55.053 -18.730  3.00  0.00           C  
ATOM   1528  O3'  DC A  48     -14.842  55.419 -19.400  0.00  0.00           O  
ATOM   1529  C2'  DC A  48     -14.019  53.942 -17.700  7.00  0.00           C  
ATOM   1530  C1'  DC A  48     -13.579  52.681 -18.320  1.00  0.00           C  
ATOM   1531  N1   DC A  48     -13.094  51.696 -17.350  0.00  0.00           N  
ATOM   1532  C2   DC A  48     -13.835  50.548 -17.100  7.00  0.00           C  
ATOM   1533  O2   DC A  48     -14.893  50.295 -17.640  2.00  0.00           O  
ATOM   1534  N3   DC A  48     -13.444  49.716 -16.160  1.00  0.00           N  
ATOM   1535  C4   DC A  48     -12.313  49.918 -15.480  7.00  0.00           C  
ATOM   1536  N4   DC A  48     -11.968  49.034 -14.570  1.00  0.00           N  
ATOM   1537  C5   DC A  48     -11.586  51.117 -15.600  9.00  0.00           C  
ATOM   1538  C6   DC A  48     -12.013  51.998 -16.590  8.00  0.00           C  
ATOM   1539  OP1  DC A  48      -8.901  56.718 -19.720  0.00  0.00           O  
ATOM   1540  OP2  DC A  48      -8.629  56.148 -17.300  2.00  0.00           O1-
ATOM   1541  H5   DC A  48     -10.779  51.362 -15.010  2.00  0.00           H  
ATOM   1542  H6   DC A  48     -11.477  52.936 -16.890  2.00  0.00           H  
ATOM   1543  H1'  DC A  48     -14.428  52.277 -18.900  7.00  0.00           H  
ATOM   1544  H2'  DC A  48     -13.532  54.139 -16.790  4.00  0.00           H  
ATOM   1545  H3'  DC A  48     -13.269  55.943 -18.310  6.00  0.00           H  
ATOM   1546  H4'  DC A  48     -13.128  54.380 -20.750  6.00  0.00           H  
ATOM   1547  H41  DC A  48     -12.419  48.101 -14.620  6.00  0.00           H  
ATOM   1548  H5'  DC A  48     -10.768  54.389 -20.630  9.00  0.00           H  
ATOM   1549  H42  DC A  48     -11.251  49.278 -13.910  2.00  0.00           H  
ATOM   1550 H2''  DC A  48     -15.071  53.949 -17.430  9.00  0.00           H  
ATOM   1551 H5''  DC A  48     -11.503  56.081 -20.340  8.00  0.00           H  
ATOM   1552  P    DT A  49     -15.823  56.473 -18.810  5.00  0.00           P  
ATOM   1553  C5'  DT A  49     -17.718  54.669 -18.480  3.00  0.00           C  
ATOM   1554  O5'  DT A  49     -16.868  55.713 -17.880  3.00  0.00           O  
ATOM   1555  C4'  DT A  49     -18.435  53.857 -17.410  2.00  0.00           C  
ATOM   1556  O4'  DT A  49     -17.414  53.078 -16.830  4.00  0.00           O  
ATOM   1557  C3'  DT A  49     -19.224  54.556 -16.410  0.00  0.00           C  
ATOM   1558  O3'  DT A  49     -20.495  53.999 -16.270  9.00  0.00           O  
ATOM   1559  C2'  DT A  49     -18.470  54.134 -15.100  5.00  0.00           C  
ATOM   1560  C1'  DT A  49     -18.004  52.728 -15.590  7.00  0.00           C  
ATOM   1561  N1   DT A  49     -17.111  51.976 -14.710  9.00  0.00           N  
ATOM   1562  C2   DT A  49     -17.264  50.600 -14.560  9.00  0.00           C  
ATOM   1563  O2   DT A  49     -18.169  50.014 -15.200  0.00  0.00           O  
ATOM   1564  N3   DT A  49     -16.371  49.979 -13.730  6.00  0.00           N  
ATOM   1565  C4   DT A  49     -15.204  50.509 -13.260  8.00  0.00           C  
ATOM   1566  O4   DT A  49     -14.438  49.780 -12.680  0.00  0.00           O  
ATOM   1567  C5   DT A  49     -15.074  51.955 -13.550  1.00  0.00           C  
ATOM   1568  C6   DT A  49     -15.997  52.599 -14.290  4.00  0.00           C  
ATOM   1569  C7   DT A  49     -13.849  52.684 -12.990  5.00  0.00           C  
ATOM   1570  OP1  DT A  49     -16.676  56.998 -19.960  3.00  0.00           O  
ATOM   1571  OP2  DT A  49     -15.048  57.471 -18.020  4.00  0.00           O1-
ATOM   1572  H3   DT A  49     -16.512  49.022 -13.570  5.00  0.00           H  
ATOM   1573  H6   DT A  49     -15.812  53.627 -14.490  9.00  0.00           H  
ATOM   1574  H1'  DT A  49     -18.898  52.036 -15.660  9.00  0.00           H  
ATOM   1575  H2'  DT A  49     -17.807  54.853 -14.790  4.00  0.00           H  
ATOM   1576  H3'  DT A  49     -19.276  55.669 -16.470  4.00  0.00           H  
ATOM   1577  H4'  DT A  49     -19.030  53.199 -18.060  0.00  0.00           H  
ATOM   1578  H5'  DT A  49     -17.005  53.993 -18.890  5.00  0.00           H  
ATOM   1579  H71  DT A  49     -12.983  52.561 -13.500  9.00  0.00           H  
ATOM   1580  H72  DT A  49     -14.096  53.746 -13.170  1.00  0.00           H  
ATOM   1581  H73  DT A  49     -13.581  52.293 -12.000  9.00  0.00           H  
ATOM   1582 H2''  DT A  49     -19.164  53.997 -14.280  0.00  0.00           H  
ATOM   1583 H5''  DT A  49     -18.450  54.953 -19.290  9.00  0.00           H  
ATOM   1584  P    DA A  50     -21.717  54.821 -15.750  7.00  0.00           P  
ATOM   1585  C5'  DA A  50     -23.344  52.947 -16.590  9.00  0.00           C  
ATOM   1586  O5'  DA A  50     -22.783  53.643 -15.530  4.00  0.00           O  
ATOM   1587  C4'  DA A  50     -23.622  51.448 -16.290  2.00  0.00           C  
ATOM   1588  O4'  DA A  50     -22.445  50.846 -15.750  9.00  0.00           O  
ATOM   1589  C3'  DA A  50     -24.833  51.231 -15.280  3.00  0.00           C  
ATOM   1590  O3'  DA A  50     -25.457  50.045 -15.710  2.00  0.00           O  
ATOM   1591  C2'  DA A  50     -24.000  51.044 -13.990  6.00  0.00           C  
ATOM   1592  C1'  DA A  50     -22.761  50.307 -14.500  9.00  0.00           C  
ATOM   1593  N1   DA A  50     -19.139  48.064 -11.540  0.00  0.00           N  
ATOM   1594  C2   DA A  50     -20.139  47.570 -12.280  4.00  0.00           C  
ATOM   1595  N3   DA A  50     -21.070  48.187 -12.960  2.00  0.00           N  
ATOM   1596  C4   DA A  50     -20.885  49.550 -13.030  8.00  0.00           C  
ATOM   1597  C5   DA A  50     -20.016  50.276 -12.220  2.00  0.00           C  
ATOM   1598  C6   DA A  50     -19.183  49.433 -11.460  6.00  0.00           C  
ATOM   1599  N6   DA A  50     -18.302  49.961 -10.660  9.00  0.00           N  
ATOM   1600  N7   DA A  50     -20.195  51.613 -12.470  5.00  0.00           N  
ATOM   1601  C8   DA A  50     -21.122  51.707 -13.340  0.00  0.00           C  
ATOM   1602  N9   DA A  50     -21.654  50.490 -13.660  3.00  0.00           N  
ATOM   1603  OP1  DA A  50     -22.102  55.715 -16.800  8.00  0.00           O  
ATOM   1604  OP2  DA A  50     -21.455  55.340 -14.420  7.00  0.00           O1-
ATOM   1605  H2   DA A  50     -20.070  46.488 -12.230  0.00  0.00           H  
ATOM   1606  H8   DA A  50     -21.481  52.666 -13.700  1.00  0.00           H  
ATOM   1607  H1'  DA A  50     -22.811  49.222 -14.680  2.00  0.00           H  
ATOM   1608  H2'  DA A  50     -23.742  52.006 -13.600  9.00  0.00           H  
ATOM   1609  H3'  DA A  50     -25.470  52.151 -15.270  8.00  0.00           H  
ATOM   1610  H4'  DA A  50     -23.798  50.907 -17.210  3.00  0.00           H  
ATOM   1611  H5'  DA A  50     -22.616  52.921 -17.450  6.00  0.00           H  
ATOM   1612  H61  DA A  50     -17.854  49.338 -10.050  0.00  0.00           H  
ATOM   1613  H62  DA A  50     -18.234  50.980 -10.600  4.00  0.00           H  
ATOM   1614 H2''  DA A  50     -24.557  50.519 -13.280  6.00  0.00           H  
ATOM   1615 H5''  DA A  50     -24.213  53.449 -16.940  2.00  0.00           H  
ATOM   1616  P    DA A  51     -26.709  49.418 -14.820  4.00  0.00           P  
ATOM   1617  C5'  DA A  51     -25.656  47.168 -14.110  7.00  0.00           C  
ATOM   1618  O5'  DA A  51     -26.007  48.483 -13.730  8.00  0.00           O  
ATOM   1619  C4'  DA A  51     -25.227  46.365 -12.870  3.00  0.00           C  
ATOM   1620  O4'  DA A  51     -24.084  46.867 -12.130  5.00  0.00           O  
ATOM   1621  C3'  DA A  51     -26.404  46.173 -11.880  3.00  0.00           C  
ATOM   1622  O3'  DA A  51     -26.546  44.830 -11.560  2.00  0.00           O  
ATOM   1623  C2'  DA A  51     -25.942  47.077 -10.760  2.00  0.00           C  
ATOM   1624  C1'  DA A  51     -24.401  46.902 -10.770  5.00  0.00           C  
ATOM   1625  N1   DA A  51     -20.449  48.610  -7.900  7.00  0.00           N  
ATOM   1626  C2   DA A  51     -20.886  47.359  -8.170  5.00  0.00           C  
ATOM   1627  N3   DA A  51     -21.918  47.003  -8.930  9.00  0.00           N  
ATOM   1628  C4   DA A  51     -22.532  48.078  -9.500  5.00  0.00           C  
ATOM   1629  C5   DA A  51     -22.065  49.365  -9.420  3.00  0.00           C  
ATOM   1630  C6   DA A  51     -20.938  49.591  -8.580  2.00  0.00           C  
ATOM   1631  N6   DA A  51     -20.363  50.735  -8.360  0.00  0.00           N  
ATOM   1632  N7   DA A  51     -22.864  50.199 -10.180  6.00  0.00           N  
ATOM   1633  C8   DA A  51     -23.847  49.456 -10.690  9.00  0.00           C  
ATOM   1634  N9   DA A  51     -23.650  48.088 -10.270  6.00  0.00           N  
ATOM   1635  OP1  DA A  51     -27.517  48.539 -15.690  8.00  0.00           O  
ATOM   1636  OP2  DA A  51     -27.324  50.487 -14.010  3.00  0.00           O1-
ATOM   1637  H2   DA A  51     -20.557  46.476  -7.540  5.00  0.00           H  
ATOM   1638  H8   DA A  51     -24.678  49.770 -11.360  0.00  0.00           H  
ATOM   1639  H1'  DA A  51     -24.143  45.947 -10.360  4.00  0.00           H  
ATOM   1640  H2'  DA A  51     -26.225  48.084 -11.100  4.00  0.00           H  
ATOM   1641  H3'  DA A  51     -27.291  46.438 -12.470  7.00  0.00           H  
ATOM   1642  H4'  DA A  51     -25.012  45.356 -13.240  9.00  0.00           H  
ATOM   1643  H5'  DA A  51     -24.813  47.240 -14.870  1.00  0.00           H  
ATOM   1644  H61  DA A  51     -19.587  50.615  -7.680  8.00  0.00           H  
ATOM   1645  H62  DA A  51     -20.729  51.569  -8.870  9.00  0.00           H  
ATOM   1646 H2''  DA A  51     -26.496  46.868  -9.880  5.00  0.00           H  
ATOM   1647 H5''  DA A  51     -26.426  46.587 -14.680  6.00  0.00           H  
ATOM   1648  P    DC A  52     -27.397  44.265 -10.320  4.00  0.00           P  
ATOM   1649  C5'  DC A  52     -25.095  43.811  -8.930  9.00  0.00           C  
ATOM   1650  O5'  DC A  52     -26.351  44.495  -9.070  6.00  0.00           O  
ATOM   1651  C4'  DC A  52     -24.428  43.972  -7.550  5.00  0.00           C  
ATOM   1652  O4'  DC A  52     -24.084  45.332  -7.580  5.00  0.00           O  
ATOM   1653  C3'  DC A  52     -25.303  43.816  -6.360  3.00  0.00           C  
ATOM   1654  O3'  DC A  52     -24.692  43.164  -5.270  9.00  0.00           O  
ATOM   1655  C2'  DC A  52     -25.514  45.297  -5.820  0.00  0.00           C  
ATOM   1656  C1'  DC A  52     -24.192  45.831  -6.240  9.00  0.00           C  
ATOM   1657  N1   DC A  52     -24.087  47.268  -6.250  9.00  0.00           N  
ATOM   1658  C2   DC A  52     -22.980  47.829  -5.550  8.00  0.00           C  
ATOM   1659  O2   DC A  52     -22.119  47.154  -4.960  8.00  0.00           O  
ATOM   1660  N3   DC A  52     -22.862  49.202  -5.510  7.00  0.00           N  
ATOM   1661  C4   DC A  52     -23.696  49.925  -6.250  4.00  0.00           C  
ATOM   1662  N4   DC A  52     -23.382  51.211  -6.310  2.00  0.00           N  
ATOM   1663  C5   DC A  52     -24.750  49.427  -7.030  4.00  0.00           C  
ATOM   1664  C6   DC A  52     -24.965  48.117  -6.940  8.00  0.00           C  
ATOM   1665  OP1  DC A  52     -27.632  42.834 -10.490  7.00  0.00           O  
ATOM   1666  OP2  DC A  52     -28.593  45.099 -10.190  3.00  0.00           O1-
ATOM   1667  H5   DC A  52     -25.372  49.980  -7.670  0.00  0.00           H  
ATOM   1668  H6   DC A  52     -25.804  47.636  -7.490  9.00  0.00           H  
ATOM   1669  H1'  DC A  52     -23.496  45.409  -5.620  3.00  0.00           H  
ATOM   1670  H2'  DC A  52     -26.341  45.806  -6.350  8.00  0.00           H  
ATOM   1671  H3'  DC A  52     -26.263  43.378  -6.610  2.00  0.00           H  
ATOM   1672  H4'  DC A  52     -23.676  43.255  -7.530  9.00  0.00           H  
ATOM   1673  H41  DC A  52     -22.651  51.474  -5.700  6.00  0.00           H  
ATOM   1674  H5'  DC A  52     -24.542  44.277  -9.730  1.00  0.00           H  
ATOM   1675  H42  DC A  52     -23.860  51.919  -6.920  7.00  0.00           H  
ATOM   1676 H2''  DC A  52     -25.568  45.475  -4.770  7.00  0.00           H  
ATOM   1677 H5''  DC A  52     -25.202  42.702  -9.110  9.00  0.00           H  
ATOM   1678  P    DC A  53     -25.472  42.560  -3.980  1.00  0.00           P  
ATOM   1679  C5'  DC A  53     -23.215  42.264  -2.910  1.00  0.00           C  
ATOM   1680  O5'  DC A  53     -24.546  42.646  -2.790  2.00  0.00           O  
ATOM   1681  C4'  DC A  53     -22.315  43.022  -1.970  7.00  0.00           C  
ATOM   1682  O4'  DC A  53     -22.363  44.392  -2.320  3.00  0.00           O  
ATOM   1683  C3'  DC A  53     -22.731  42.991  -0.490  6.00  0.00           C  
ATOM   1684  O3'  DC A  53     -21.536  42.909   0.250  3.00  0.00           O  
ATOM   1685  C2'  DC A  53     -23.442  44.275  -0.270  6.00  0.00           C  
ATOM   1686  C1'  DC A  53     -22.638  45.144  -1.190  5.00  0.00           C  
ATOM   1687  N1   DC A  53     -23.335  46.352  -1.600  1.00  0.00           N  
ATOM   1688  C2   DC A  53     -22.804  47.589  -1.190  5.00  0.00           C  
ATOM   1689  O2   DC A  53     -21.973  47.663  -0.320  6.00  0.00           O  
ATOM   1690  N3   DC A  53     -23.297  48.736  -1.700  5.00  0.00           N  
ATOM   1691  C4   DC A  53     -24.533  48.697  -2.300  1.00  0.00           C  
ATOM   1692  N4   DC A  53     -25.029  49.837  -2.710  9.00  0.00           N  
ATOM   1693  C5   DC A  53     -25.142  47.469  -2.700  1.00  0.00           C  
ATOM   1694  C6   DC A  53     -24.516  46.270  -2.370  8.00  0.00           C  
ATOM   1695  OP1  DC A  53     -25.717  41.096  -4.200  7.00  0.00           O  
ATOM   1696  OP2  DC A  53     -26.626  43.423  -3.690  6.00  0.00           O1-
ATOM   1697  H5   DC A  53     -26.108  47.402  -3.310  8.00  0.00           H  
ATOM   1698  H6   DC A  53     -24.944  45.301  -2.520  6.00  0.00           H  
ATOM   1699  H1'  DC A  53     -21.710  45.342  -0.640  2.00  0.00           H  
ATOM   1700  H2'  DC A  53     -24.442  44.150  -0.630  8.00  0.00           H  
ATOM   1701  H3'  DC A  53     -23.314  42.068  -0.350  8.00  0.00           H  
ATOM   1702  H4'  DC A  53     -21.219  42.683  -2.150  3.00  0.00           H  
ATOM   1703  H41  DC A  53     -24.527  50.676  -2.500  7.00  0.00           H  
ATOM   1704  H5'  DC A  53     -22.747  42.536  -3.890  9.00  0.00           H  
ATOM   1705  H42  DC A  53     -25.899  49.780  -3.210  8.00  0.00           H  
ATOM   1706 H2''  DC A  53     -23.406  44.559   0.790  5.00  0.00           H  
ATOM   1707 H5''  DC A  53     -23.098  41.225  -2.620  7.00  0.00           H  
ATOM   1708  P    DC A  54     -21.452  42.441   1.750  6.00  0.00           P  
ATOM   1709  C5'  DC A  54     -20.168  44.561   2.650  1.00  0.00           C  
ATOM   1710  O5'  DC A  54     -21.350  43.755   2.620  5.00  0.00           O  
ATOM   1711  C4'  DC A  54     -20.221  45.920   3.420  1.00  0.00           C  
ATOM   1712  O4'  DC A  54     -20.972  46.875   2.650  9.00  0.00           O  
ATOM   1713  C3'  DC A  54     -20.890  45.728   4.830  5.00  0.00           C  
ATOM   1714  O3'  DC A  54     -20.020  46.113   5.920  1.00  0.00           O  
ATOM   1715  C2'  DC A  54     -22.091  46.641   4.710  2.00  0.00           C  
ATOM   1716  C1'  DC A  54     -21.680  47.622   3.610  3.00  0.00           C  
ATOM   1717  N1   DC A  54     -22.790  48.358   2.960  1.00  0.00           N  
ATOM   1718  C2   DC A  54     -22.793  49.813   2.960  6.00  0.00           C  
ATOM   1719  O2   DC A  54     -22.070  50.484   3.630  3.00  0.00           O  
ATOM   1720  N3   DC A  54     -23.820  50.443   2.280  1.00  0.00           N  
ATOM   1721  C4   DC A  54     -24.777  49.758   1.620  9.00  0.00           C  
ATOM   1722  N4   DC A  54     -25.648  50.456   0.960  1.00  0.00           N  
ATOM   1723  C5   DC A  54     -24.628  48.377   1.440  2.00  0.00           C  
ATOM   1724  C6   DC A  54     -23.647  47.708   2.100  5.00  0.00           C  
ATOM   1725  OP1  DC A  54     -20.211  41.649   1.850  1.00  0.00           O  
ATOM   1726  OP2  DC A  54     -22.736  41.791   2.190  0.00  0.00           O1-
ATOM   1727  H5   DC A  54     -25.167  47.667   0.740  6.00  0.00           H  
ATOM   1728  H6   DC A  54     -23.382  46.704   1.820  4.00  0.00           H  
ATOM   1729  H1'  DC A  54     -21.039  48.378   4.050  3.00  0.00           H  
ATOM   1730  H2'  DC A  54     -22.939  46.094   4.410  6.00  0.00           H  
ATOM   1731  H3'  DC A  54     -21.347  44.693   5.020  0.00  0.00           H  
ATOM   1732  H4'  DC A  54     -19.245  46.438   3.480  5.00  0.00           H  
ATOM   1733  H41  DC A  54     -25.578  51.512   0.910  9.00  0.00           H  
ATOM   1734  H5'  DC A  54     -19.916  44.847   1.670  6.00  0.00           H  
ATOM   1735  H42  DC A  54     -26.175  50.003   0.200  0.00  0.00           H  
ATOM   1736 H2''  DC A  54     -22.371  47.194   5.660  0.00  0.00           H  
ATOM   1737 H5''  DC A  54     -19.402  43.946   3.060  2.00  0.00           H  
ATOM   1738  P    DT A  55     -20.517  46.141   7.520  1.00  0.00           P  
ATOM   1739  C5'  DT A  55     -19.980  48.718   7.670  0.00  0.00           C  
ATOM   1740  O5'  DT A  55     -20.961  47.667   7.740  1.00  0.00           O  
ATOM   1741  C4'  DT A  55     -20.806  50.050   7.640  9.00  0.00           C  
ATOM   1742  O4'  DT A  55     -21.740  49.997   6.620  5.00  0.00           O  
ATOM   1743  C3'  DT A  55     -21.652  50.309   8.900  3.00  0.00           C  
ATOM   1744  O3'  DT A  55     -20.930  50.988   9.900  4.00  0.00           O  
ATOM   1745  C2'  DT A  55     -22.854  51.076   8.270  9.00  0.00           C  
ATOM   1746  C1'  DT A  55     -22.694  50.996   6.790  3.00  0.00           C  
ATOM   1747  N1   DT A  55     -23.937  50.742   6.020  9.00  0.00           N  
ATOM   1748  C2   DT A  55     -24.491  51.803   5.300  4.00  0.00           C  
ATOM   1749  O2   DT A  55     -24.327  52.954   5.560  8.00  0.00           O  
ATOM   1750  N3   DT A  55     -25.556  51.444   4.490  8.00  0.00           N  
ATOM   1751  C4   DT A  55     -26.178  50.217   4.510  8.00  0.00           C  
ATOM   1752  O4   DT A  55     -27.230  50.088   3.930  0.00  0.00           O  
ATOM   1753  C5   DT A  55     -25.518  49.147   5.270  8.00  0.00           C  
ATOM   1754  C6   DT A  55     -24.387  49.463   5.940  6.00  0.00           C  
ATOM   1755  C7   DT A  55     -26.003  47.716   5.200  3.00  0.00           C  
ATOM   1756  OP1  DT A  55     -19.509  45.861   8.520  6.00  0.00           O  
ATOM   1757  OP2  DT A  55     -21.837  45.417   7.550  0.00  0.00           O1-
ATOM   1758  H3   DT A  55     -26.114  52.289   4.360  9.00  0.00           H  
ATOM   1759  H6   DT A  55     -23.873  48.686   6.490  9.00  0.00           H  
ATOM   1760  H1'  DT A  55     -22.263  51.965   6.370  9.00  0.00           H  
ATOM   1761  H2'  DT A  55     -23.773  50.616   8.630  6.00  0.00           H  
ATOM   1762  H3'  DT A  55     -21.979  49.339   9.220  4.00  0.00           H  
ATOM   1763  H4'  DT A  55     -20.132  50.851   7.420  6.00  0.00           H  
ATOM   1764  H5'  DT A  55     -19.424  48.683   6.710  7.00  0.00           H  
ATOM   1765  H71  DT A  55     -26.962  47.527   5.660  5.00  0.00           H  
ATOM   1766  H72  DT A  55     -26.029  47.491   4.190  6.00  0.00           H  
ATOM   1767  H73  DT A  55     -25.247  47.146   5.720  0.00  0.00           H  
ATOM   1768 H2''  DT A  55     -22.858  52.070   8.520  3.00  0.00           H  
ATOM   1769 H5''  DT A  55     -19.332  48.752   8.530  7.00  0.00           H  
ATOM   1770  P    DA A  56     -21.523  51.013  11.380  6.00  0.00           P  
ATOM   1771  C5'  DA A  56     -22.628  53.436  11.310  7.00  0.00           C  
ATOM   1772  O5'  DA A  56     -22.718  52.020  11.190  9.00  0.00           O  
ATOM   1773  C4'  DA A  56     -23.951  54.196  11.000  0.00  0.00           C  
ATOM   1774  O4'  DA A  56     -24.493  54.096   9.670  6.00  0.00           O  
ATOM   1775  C3'  DA A  56     -25.100  53.835  11.960  2.00  0.00           C  
ATOM   1776  O3'  DA A  56     -25.714  54.931  12.530  0.00  0.00           O  
ATOM   1777  C2'  DA A  56     -25.995  52.997  11.050  3.00  0.00           C  
ATOM   1778  C1'  DA A  56     -25.866  53.793   9.770  0.00  0.00           C  
ATOM   1779  N1   DA A  56     -29.256  53.948   5.730  6.00  0.00           N  
ATOM   1780  C2   DA A  56     -28.800  54.880   6.590  7.00  0.00           C  
ATOM   1781  N3   DA A  56     -27.863  54.803   7.500  9.00  0.00           N  
ATOM   1782  C4   DA A  56     -27.317  53.595   7.630  9.00  0.00           C  
ATOM   1783  C5   DA A  56     -27.716  52.533   6.870  7.00  0.00           C  
ATOM   1784  C6   DA A  56     -28.666  52.760   5.880  7.00  0.00           C  
ATOM   1785  N6   DA A  56     -29.194  51.868   5.090  2.00  0.00           N  
ATOM   1786  N7   DA A  56     -27.104  51.339   7.300  2.00  0.00           N  
ATOM   1787  C8   DA A  56     -26.351  51.748   8.310  5.00  0.00           C  
ATOM   1788  N9   DA A  56     -26.399  53.115   8.540  7.00  0.00           N  
ATOM   1789  OP1  DA A  56     -20.568  51.683  12.320  1.00  0.00           O  
ATOM   1790  OP2  DA A  56     -22.059  49.665  11.780  4.00  0.00           O1-
ATOM   1791  H2   DA A  56     -29.147  55.947   6.460  1.00  0.00           H  
ATOM   1792  H8   DA A  56     -25.824  51.048   8.940  3.00  0.00           H  
ATOM   1793  H1'  DA A  56     -26.426  54.799   9.800  9.00  0.00           H  
ATOM   1794  H2'  DA A  56     -25.519  51.968  10.930  1.00  0.00           H  
ATOM   1795  H3'  DA A  56     -24.734  53.103  12.730  4.00  0.00           H  
ATOM   1796  H4'  DA A  56     -23.596  55.200  11.280  3.00  0.00           H  
ATOM   1797  H5'  DA A  56     -21.902  53.788  10.630  6.00  0.00           H  
ATOM   1798  H61  DA A  56     -29.906  52.072   4.390  9.00  0.00           H  
ATOM   1799  H62  DA A  56     -28.798  50.948   4.980  9.00  0.00           H  
ATOM   1800 H2''  DA A  56     -26.934  53.046  11.450  4.00  0.00           H  
ATOM   1801 H5''  DA A  56     -22.312  53.578  12.360  7.00  0.00           H  
ATOM   1802  P    DA A  57     -26.870  54.783  13.690  1.00  0.00           P  
ATOM   1803  C5'  DA A  57     -28.497  56.257  12.370  4.00  0.00           C  
ATOM   1804  O5'  DA A  57     -28.209  54.967  12.880  2.00  0.00           O  
ATOM   1805  C4'  DA A  57     -29.756  56.316  11.400  3.00  0.00           C  
ATOM   1806  O4'  DA A  57     -29.742  55.415  10.260  9.00  0.00           O  
ATOM   1807  C3'  DA A  57     -31.050  55.987  12.120  3.00  0.00           C  
ATOM   1808  O3'  DA A  57     -31.971  57.107  11.950  4.00  0.00           O  
ATOM   1809  C2'  DA A  57     -31.557  54.680  11.460  9.00  0.00           C  
ATOM   1810  C1'  DA A  57     -31.071  54.948  10.010  9.00  0.00           C  
ATOM   1811  N1   DA A  57     -33.157  52.541   5.980  0.00  0.00           N  
ATOM   1812  C2   DA A  57     -33.169  53.801   6.400  3.00  0.00           C  
ATOM   1813  N3   DA A  57     -32.549  54.348   7.450  4.00  0.00           N  
ATOM   1814  C4   DA A  57     -31.838  53.409   8.130  3.00  0.00           C  
ATOM   1815  C5   DA A  57     -31.761  52.139   7.780  3.00  0.00           C  
ATOM   1816  C6   DA A  57     -32.422  51.712   6.640  1.00  0.00           C  
ATOM   1817  N6   DA A  57     -32.500  50.428   6.300  8.00  0.00           N  
ATOM   1818  N7   DA A  57     -30.975  51.488   8.720  1.00  0.00           N  
ATOM   1819  C8   DA A  57     -30.586  52.412   9.580  5.00  0.00           C  
ATOM   1820  N9   DA A  57     -31.132  53.649   9.300  0.00  0.00           N  
ATOM   1821  OP1  DA A  57     -26.755  55.936  14.570  4.00  0.00           O  
ATOM   1822  OP2  DA A  57     -26.815  53.450  14.420  7.00  0.00           O1-
ATOM   1823  H2   DA A  57     -33.620  54.589   5.810  7.00  0.00           H  
ATOM   1824  H8   DA A  57     -29.908  52.228  10.460  2.00  0.00           H  
ATOM   1825  H1'  DA A  57     -31.740  55.621   9.470  7.00  0.00           H  
ATOM   1826  H2'  DA A  57     -31.195  53.796  11.960  8.00  0.00           H  
ATOM   1827  H3'  DA A  57     -30.753  55.706  13.130  5.00  0.00           H  
ATOM   1828  H4'  DA A  57     -29.983  57.358  11.010  6.00  0.00           H  
ATOM   1829  H5'  DA A  57     -27.514  56.608  11.900  1.00  0.00           H  
ATOM   1830  H61  DA A  57     -33.096  50.208   5.590  3.00  0.00           H  
ATOM   1831  H62  DA A  57     -32.080  49.728   6.890  7.00  0.00           H  
ATOM   1832 H2''  DA A  57     -32.674  54.628  11.420  5.00  0.00           H  
ATOM   1833 H5''  DA A  57     -28.716  56.895  13.200  1.00  0.00           H  
ATOM   1834  P    DC A  58     -33.498  57.060  12.420  8.00  0.00           P  
ATOM   1835  C5'  DC A  58     -34.457  57.566  10.060  0.00  0.00           C  
ATOM   1836  O5'  DC A  58     -34.338  56.714  11.150  6.00  0.00           O  
ATOM   1837  C4'  DC A  58     -35.688  57.093   9.230  0.00  0.00           C  
ATOM   1838  O4'  DC A  58     -35.312  55.826   8.690  1.00  0.00           O  
ATOM   1839  C3'  DC A  58     -36.999  56.937  10.030  6.00  0.00           C  
ATOM   1840  O3'  DC A  58     -38.049  57.411   9.160  1.00  0.00           O  
ATOM   1841  C2'  DC A  58     -37.004  55.525  10.370  4.00  0.00           C  
ATOM   1842  C1'  DC A  58     -36.431  55.000   9.020  3.00  0.00           C  
ATOM   1843  N1   DC A  58     -36.038  53.552   9.070  5.00  0.00           N  
ATOM   1844  C2   DC A  58     -36.981  52.550   8.700  5.00  0.00           C  
ATOM   1845  O2   DC A  58     -38.157  52.892   8.580  0.00  0.00           O  
ATOM   1846  N3   DC A  58     -36.599  51.263   8.290  0.00  0.00           N  
ATOM   1847  C4   DC A  58     -35.387  50.933   8.700  4.00  0.00           C  
ATOM   1848  N4   DC A  58     -35.049  49.695   8.450  4.00  0.00           N  
ATOM   1849  C5   DC A  58     -34.508  51.814   9.450  7.00  0.00           C  
ATOM   1850  C6   DC A  58     -34.861  53.149   9.510  9.00  0.00           C  
ATOM   1851  OP1  DC A  58     -33.889  58.414  12.800  7.00  0.00           O  
ATOM   1852  OP2  DC A  58     -33.720  55.911  13.400  3.00  0.00           O1-
ATOM   1853  H5   DC A  58     -33.602  51.431   9.890  3.00  0.00           H  
ATOM   1854  H6   DC A  58     -34.054  53.798   9.820  7.00  0.00           H  
ATOM   1855  H1'  DC A  58     -37.319  55.203   8.350  4.00  0.00           H  
ATOM   1856  H2'  DC A  58     -36.414  55.353  11.220  6.00  0.00           H  
ATOM   1857  H3'  DC A  58     -36.982  57.566  10.830  6.00  0.00           H  
ATOM   1858  H4'  DC A  58     -35.807  57.803   8.460  4.00  0.00           H  
ATOM   1859  H41  DC A  58     -35.653  49.211   7.790  7.00  0.00           H  
ATOM   1860  H5'  DC A  58     -33.606  57.529   9.370  9.00  0.00           H  
ATOM   1861  H42  DC A  58     -34.136  49.374   8.740  8.00  0.00           H  
ATOM   1862 H2''  DC A  58     -38.033  55.154  10.520  0.00  0.00           H  
ATOM   1863 H5''  DC A  58     -34.722  58.543  10.440  8.00  0.00           H  
ATOM   1864  P    DC A  59     -38.924  58.753   9.370  8.00  0.00           P  
ATOM   1865  C5'  DC A  59     -40.153  59.940  11.280  9.00  0.00           C  
ATOM   1866  O5'  DC A  59     -39.462  58.791  10.800  4.00  0.00           O  
ATOM   1867  C4'  DC A  59     -40.389  59.476  12.780  0.00  0.00           C  
ATOM   1868  O4'  DC A  59     -41.425  58.552  12.870  8.00  0.00           O  
ATOM   1869  C3'  DC A  59     -39.186  58.922  13.500  5.00  0.00           C  
ATOM   1870  O3'  DC A  59     -39.095  59.373  14.860  2.00  0.00           O  
ATOM   1871  C2'  DC A  59     -39.489  57.470  13.640  9.00  0.00           C  
ATOM   1872  C1'  DC A  59     -41.009  57.619  13.830  0.00  0.00           C  
ATOM   1873  N1   DC A  59     -41.767  56.318  13.710  6.00  0.00           N  
ATOM   1874  C2   DC A  59     -42.430  55.710  14.760  4.00  0.00           C  
ATOM   1875  O2   DC A  59     -42.304  56.045  15.930  8.00  0.00           O  
ATOM   1876  N3   DC A  59     -43.211  54.643  14.530  7.00  0.00           N  
ATOM   1877  C4   DC A  59     -43.407  54.241  13.330  9.00  0.00           C  
ATOM   1878  N4   DC A  59     -44.123  53.151  13.240  1.00  0.00           N  
ATOM   1879  C5   DC A  59     -42.767  54.734  12.240  3.00  0.00           C  
ATOM   1880  C6   DC A  59     -42.055  55.899  12.410  0.00  0.00           C  
ATOM   1881  OP1  DC A  59     -40.132  58.735   8.440  1.00  0.00           O  
ATOM   1882  OP2  DC A  59     -37.968  59.830   9.300  9.00  0.00           O1-
ATOM   1883  H5   DC A  59     -42.903  54.368  11.270  6.00  0.00           H  
ATOM   1884  H6   DC A  59     -41.658  56.451  11.580  3.00  0.00           H  
ATOM   1885  H1'  DC A  59     -41.062  57.965  14.890  6.00  0.00           H  
ATOM   1886  H2'  DC A  59     -39.308  56.943  12.750  3.00  0.00           H  
ATOM   1887  H3'  DC A  59     -38.294  59.124  12.930  9.00  0.00           H  
ATOM   1888  H4'  DC A  59     -40.693  60.345  13.310  6.00  0.00           H  
ATOM   1889  H41  DC A  59     -44.208  52.648  14.090  2.00  0.00           H  
ATOM   1890  H5'  DC A  59     -41.023  60.099  10.720  1.00  0.00           H  
ATOM   1891  H42  DC A  59     -44.215  52.851  12.240  9.00  0.00           H  
ATOM   1892 H2''  DC A  59     -39.070  56.893  14.500  3.00  0.00           H  
ATOM   1893 H5''  DC A  59     -39.478  60.771  11.270  1.00  0.00           H  
ATOM   1894  P    DC A  60     -38.406  60.751  15.210  8.00  0.00           P  
ATOM   1895  C5'  DC A  60     -40.029  60.993  17.370  1.00  0.00           C  
ATOM   1896  O5'  DC A  60     -38.721  61.138  16.780  2.00  0.00           O  
ATOM   1897  C4'  DC A  60     -39.959  61.248  18.900  8.00  0.00           C  
ATOM   1898  O4'  DC A  60     -41.211  60.844  19.480  3.00  0.00           O  
ATOM   1899  C3'  DC A  60     -38.907  60.400  19.670  1.00  0.00           C  
ATOM   1900  O3'  DC A  60     -38.546  61.117  20.900  6.00  0.00           O  
ATOM   1901  C2'  DC A  60     -39.677  59.055  19.890  5.00  0.00           C  
ATOM   1902  C1'  DC A  60     -41.039  59.653  20.200  2.00  0.00           C  
ATOM   1903  N1   DC A  60     -42.176  58.633  19.900  4.00  0.00           N  
ATOM   1904  C2   DC A  60     -42.905  58.053  20.910  2.00  0.00           C  
ATOM   1905  O2   DC A  60     -42.549  58.369  22.030  2.00  0.00           O  
ATOM   1906  N3   DC A  60     -43.889  57.199  20.700  6.00  0.00           N  
ATOM   1907  C4   DC A  60     -44.208  56.966  19.430  4.00  0.00           C  
ATOM   1908  N4   DC A  60     -45.275  56.251  19.290  8.00  0.00           N  
ATOM   1909  C5   DC A  60     -43.577  57.639  18.330  8.00  0.00           C  
ATOM   1910  C6   DC A  60     -42.566  58.442  18.630  7.00  0.00           C  
ATOM   1911  OP1  DC A  60     -38.984  61.784  14.380  9.00  0.00           O  
ATOM   1912  OP2  DC A  60     -37.004  60.539  15.090  8.00  0.00           O1-
ATOM   1913  H5   DC A  60     -43.915  57.396  17.350  8.00  0.00           H  
ATOM   1914  H6   DC A  60     -42.111  58.868  17.780  1.00  0.00           H  
ATOM   1915  H1'  DC A  60     -41.132  59.949  21.220  2.00  0.00           H  
ATOM   1916  H2'  DC A  60     -39.629  58.380  19.010  6.00  0.00           H  
ATOM   1917  H3'  DC A  60     -37.997  60.219  19.060  9.00  0.00           H  
ATOM   1918  H4'  DC A  60     -39.808  62.298  19.240  2.00  0.00           H  
ATOM   1919  H41  DC A  60     -45.837  56.051  20.090  3.00  0.00           H  
ATOM   1920  H5'  DC A  60     -40.318  60.033  17.240  0.00  0.00           H  
ATOM   1921  H42  DC A  60     -45.677  56.375  18.400  7.00  0.00           H  
ATOM   1922 H2''  DC A  60     -39.247  58.643  20.740  7.00  0.00           H  
ATOM   1923 H5''  DC A  60     -40.854  61.626  16.930  3.00  0.00           H  
ATOM   1924  P    DT A  61     -37.201  60.991  21.790  2.00  0.00           P  
ATOM   1925  C5'  DT A  61     -36.665  59.226  23.650  7.00  0.00           C  
ATOM   1926  O5'  DT A  61     -37.588  59.736  22.690  7.00  0.00           O  
ATOM   1927  C4'  DT A  61     -37.285  58.253  24.690  8.00  0.00           C  
ATOM   1928  O4'  DT A  61     -38.351  59.015  25.340  7.00  0.00           O  
ATOM   1929  C3'  DT A  61     -38.076  57.066  24.020  9.00  0.00           C  
ATOM   1930  O3'  DT A  61     -38.293  55.971  24.850  0.00  0.00           O  
ATOM   1931  C2'  DT A  61     -39.413  57.657  23.790  1.00  0.00           C  
ATOM   1932  C1'  DT A  61     -39.664  58.609  24.970  2.00  0.00           C  
ATOM   1933  N1   DT A  61     -40.555  59.713  24.740  9.00  0.00           N  
ATOM   1934  C2   DT A  61     -41.548  59.906  25.750  0.00  0.00           C  
ATOM   1935  O2   DT A  61     -41.804  59.131  26.630  6.00  0.00           O  
ATOM   1936  N3   DT A  61     -42.255  61.103  25.650  3.00  0.00           N  
ATOM   1937  C4   DT A  61     -42.161  61.977  24.640  2.00  0.00           C  
ATOM   1938  O4   DT A  61     -42.723  63.049  24.800  2.00  0.00           O  
ATOM   1939  C5   DT A  61     -41.268  61.663  23.550  5.00  0.00           C  
ATOM   1940  C6   DT A  61     -40.459  60.602  23.650  5.00  0.00           C  
ATOM   1941  C7   DT A  61     -41.273  62.676  22.460  5.00  0.00           C  
ATOM   1942  OP1  DT A  61     -37.202  62.190  22.660  2.00  0.00           O  
ATOM   1943  OP2  DT A  61     -36.077  60.646  20.870  7.00  0.00           O1-
ATOM   1944  H3   DT A  61     -42.889  61.207  26.460  3.00  0.00           H  
ATOM   1945  H6   DT A  61     -39.813  60.378  22.810  9.00  0.00           H  
ATOM   1946  H1'  DT A  61     -39.939  58.040  25.850  4.00  0.00           H  
ATOM   1947  H2'  DT A  61     -39.511  58.113  22.760  4.00  0.00           H  
ATOM   1948  H3'  DT A  61     -37.639  56.805  23.020  7.00  0.00           H  
ATOM   1949  H4'  DT A  61     -36.640  57.808  25.460  8.00  0.00           H  
ATOM   1950  H5'  DT A  61     -36.127  60.050  24.120  1.00  0.00           H  
ATOM   1951  H71  DT A  61     -41.115  63.665  22.870  4.00  0.00           H  
ATOM   1952  H72  DT A  61     -42.260  62.581  21.930  9.00  0.00           H  
ATOM   1953  H73  DT A  61     -40.437  62.498  21.840  1.00  0.00           H  
ATOM   1954 H2''  DT A  61     -40.147  56.876  23.890  1.00  0.00           H  
ATOM   1955 H5''  DT A  61     -35.858  58.661  23.120  0.00  0.00           H  
ATOM   1956  P    DA A  62     -37.637  54.624  24.390  6.00  0.00           P  
ATOM   1957  C5'  DA A  62     -39.991  53.569  23.730  3.00  0.00           C  
ATOM   1958  O5'  DA A  62     -38.691  53.867  23.390  7.00  0.00           O  
ATOM   1959  C4'  DA A  62     -40.626  52.813  22.580  8.00  0.00           C  
ATOM   1960  O4'  DA A  62     -41.960  52.322  22.910  8.00  0.00           O  
ATOM   1961  C3'  DA A  62     -40.888  53.759  21.410  2.00  0.00           C  
ATOM   1962  O3'  DA A  62     -40.658  53.066  20.210  9.00  0.00           O  
ATOM   1963  C2'  DA A  62     -42.383  54.160  21.500  8.00  0.00           C  
ATOM   1964  C1'  DA A  62     -42.831  52.804  21.870  4.00  0.00           C  
ATOM   1965  N1   DA A  62     -47.558  51.181  20.920  3.00  0.00           N  
ATOM   1966  C2   DA A  62     -46.341  50.844  20.480  2.00  0.00           C  
ATOM   1967  N3   DA A  62     -45.168  51.275  20.840  8.00  0.00           N  
ATOM   1968  C4   DA A  62     -45.254  52.229  21.790  5.00  0.00           C  
ATOM   1969  C5   DA A  62     -46.402  52.656  22.390  0.00  0.00           C  
ATOM   1970  C6   DA A  62     -47.600  52.107  21.900  6.00  0.00           C  
ATOM   1971  N6   DA A  62     -48.769  52.493  22.400  6.00  0.00           N  
ATOM   1972  N7   DA A  62     -46.123  53.629  23.400  6.00  0.00           N  
ATOM   1973  C8   DA A  62     -44.783  53.709  23.390  7.00  0.00           C  
ATOM   1974  N9   DA A  62     -44.225  52.889  22.360  8.00  0.00           N  
ATOM   1975  OP1  DA A  62     -37.675  53.784  25.620  9.00  0.00           O  
ATOM   1976  OP2  DA A  62     -36.354  54.927  23.720  4.00  0.00           O1-
ATOM   1977  H2   DA A  62     -46.391  50.151  19.640  4.00  0.00           H  
ATOM   1978  H8   DA A  62     -44.171  54.382  23.930  7.00  0.00           H  
ATOM   1979  H1'  DA A  62     -42.682  52.058  21.100  9.00  0.00           H  
ATOM   1980  H2'  DA A  62     -42.757  54.972  22.190  9.00  0.00           H  
ATOM   1981  H3'  DA A  62     -40.211  54.553  21.380  3.00  0.00           H  
ATOM   1982  H4'  DA A  62     -40.080  51.977  22.300  4.00  0.00           H  
ATOM   1983  H5'  DA A  62     -40.510  54.505  24.030  4.00  0.00           H  
ATOM   1984  H61  DA A  62     -49.629  52.141  22.000  2.00  0.00           H  
ATOM   1985  H62  DA A  62     -48.778  53.155  23.180  5.00  0.00           H  
ATOM   1986 H2''  DA A  62     -42.580  54.372  20.440  1.00  0.00           H  
ATOM   1987 H5''  DA A  62     -39.990  52.944  24.660  1.00  0.00           H  
ATOM   1988  P    DA A  63     -40.259  53.649  18.900  7.00  0.00           P  
ATOM   1989  C5'  DA A  63     -37.763  52.919  19.460  8.00  0.00           C  
ATOM   1990  O5'  DA A  63     -38.977  52.718  18.670  4.00  0.00           O  
ATOM   1991  C4'  DA A  63     -37.242  51.720  20.280  5.00  0.00           C  
ATOM   1992  O4'  DA A  63     -38.297  51.183  21.110  7.00  0.00           O  
ATOM   1993  C3'  DA A  63     -36.739  50.579  19.380  7.00  0.00           C  
ATOM   1994  O3'  DA A  63     -35.666  49.881  20.000  0.00  0.00           O  
ATOM   1995  C2'  DA A  63     -37.970  49.739  19.260  1.00  0.00           C  
ATOM   1996  C1'  DA A  63     -38.583  49.855  20.680  2.00  0.00           C  
ATOM   1997  N1   DA A  63     -42.364  48.855  23.690  7.00  0.00           N  
ATOM   1998  C2   DA A  63     -41.054  48.986  23.890  0.00  0.00           C  
ATOM   1999  N3   DA A  63     -40.119  49.091  22.970  9.00  0.00           N  
ATOM   2000  C4   DA A  63     -40.695  49.174  21.700  8.00  0.00           C  
ATOM   2001  C5   DA A  63     -42.019  49.220  21.330  0.00  0.00           C  
ATOM   2002  C6   DA A  63     -42.890  48.933  22.450  5.00  0.00           C  
ATOM   2003  N6   DA A  63     -44.187  49.016  22.390  1.00  0.00           N  
ATOM   2004  N7   DA A  63     -42.145  49.543  20.000  3.00  0.00           N  
ATOM   2005  C8   DA A  63     -40.891  49.763  19.640  2.00  0.00           C  
ATOM   2006  N9   DA A  63     -39.986  49.602  20.620  7.00  0.00           N  
ATOM   2007  OP1  DA A  63     -39.843  55.067  19.000  3.00  0.00           O  
ATOM   2008  OP2  DA A  63     -41.350  53.278  17.970  4.00  0.00           O1-
ATOM   2009  H2   DA A  63     -40.654  48.689  24.850  2.00  0.00           H  
ATOM   2010  H8   DA A  63     -40.575  50.123  18.640  1.00  0.00           H  
ATOM   2011  H1'  DA A  63     -38.015  49.193  21.300  2.00  0.00           H  
ATOM   2012  H2'  DA A  63     -38.651  50.122  18.490  3.00  0.00           H  
ATOM   2013  H3'  DA A  63     -36.532  50.913  18.390  6.00  0.00           H  
ATOM   2014  H4'  DA A  63     -36.385  51.913  20.900  8.00  0.00           H  
ATOM   2015  H5'  DA A  63     -37.914  53.719  20.240  1.00  0.00           H  
ATOM   2016  H61  DA A  63     -44.777  48.967  23.140  9.00  0.00           H  
ATOM   2017  H62  DA A  63     -44.623  49.259  21.510  5.00  0.00           H  
ATOM   2018 H2''  DA A  63     -37.701  48.715  18.970  0.00  0.00           H  
ATOM   2019 H5''  DA A  63     -36.955  53.204  18.850  4.00  0.00           H  
ATOM   2020  P    DC A  64     -34.309  49.307  19.300  0.00  0.00           P  
ATOM   2021  C5'  DC A  64     -35.034  46.818  18.590  6.00  0.00           C  
ATOM   2022  O5'  DC A  64     -34.961  48.244  18.320  5.00  0.00           O  
ATOM   2023  C4'  DC A  64     -35.522  45.965  17.400  3.00  0.00           C  
ATOM   2024  O4'  DC A  64     -36.825  46.265  16.980  8.00  0.00           O  
ATOM   2025  C3'  DC A  64     -34.570  46.044  16.180  2.00  0.00           C  
ATOM   2026  O3'  DC A  64     -34.443  44.790  15.630  9.00  0.00           O  
ATOM   2027  C2'  DC A  64     -35.361  46.918  15.160  4.00  0.00           C  
ATOM   2028  C1'  DC A  64     -36.794  46.524  15.550  4.00  0.00           C  
ATOM   2029  N1   DC A  64     -37.722  47.610  15.210  1.00  0.00           N  
ATOM   2030  C2   DC A  64     -38.559  47.433  14.100  4.00  0.00           C  
ATOM   2031  O2   DC A  64     -38.655  46.353  13.440  4.00  0.00           O  
ATOM   2032  N3   DC A  64     -39.387  48.445  13.620  7.00  0.00           N  
ATOM   2033  C4   DC A  64     -39.333  49.590  14.210  8.00  0.00           C  
ATOM   2034  N4   DC A  64     -39.836  50.577  13.510  4.00  0.00           N  
ATOM   2035  C5   DC A  64     -38.556  49.829  15.400  0.00  0.00           C  
ATOM   2036  C6   DC A  64     -37.758  48.808  15.850  1.00  0.00           C  
ATOM   2037  OP1  DC A  64     -33.427  48.698  20.270  0.00  0.00           O  
ATOM   2038  OP2  DC A  64     -33.779  50.313  18.360  0.00  0.00           O1-
ATOM   2039  H5   DC A  64     -38.433  50.877  15.780  6.00  0.00           H  
ATOM   2040  H6   DC A  64     -37.038  48.990  16.610  1.00  0.00           H  
ATOM   2041  H1'  DC A  64     -37.138  45.608  15.060  1.00  0.00           H  
ATOM   2042  H2'  DC A  64     -35.126  47.951  15.480  7.00  0.00           H  
ATOM   2043  H3'  DC A  64     -33.604  46.533  16.510  9.00  0.00           H  
ATOM   2044  H4'  DC A  64     -35.552  44.916  17.700  6.00  0.00           H  
ATOM   2045  H41  DC A  64     -40.256  50.402  12.610  0.00  0.00           H  
ATOM   2046  H5'  DC A  64     -35.775  46.515  19.410  0.00  0.00           H  
ATOM   2047  H42  DC A  64     -39.899  51.474  13.860  6.00  0.00           H  
ATOM   2048 H2''  DC A  64     -35.066  46.683  14.150  6.00  0.00           H  
ATOM   2049 H5''  DC A  64     -34.035  46.487  18.900  3.00  0.00           H  
ATOM   2050  P    DC A  65     -33.242  44.508  14.660  9.00  0.00           P  
ATOM   2051  C5'  DC A  65     -34.911  44.096  12.690  5.00  0.00           C  
ATOM   2052  O5'  DC A  65     -33.725  44.714  13.240  4.00  0.00           O  
ATOM   2053  C4'  DC A  65     -35.508  44.783  11.530  4.00  0.00           C  
ATOM   2054  O4'  DC A  65     -36.203  45.961  11.940  1.00  0.00           O  
ATOM   2055  C3'  DC A  65     -34.501  45.265  10.420  7.00  0.00           C  
ATOM   2056  O3'  DC A  65     -34.899  44.831   9.100  6.00  0.00           O  
ATOM   2057  C2'  DC A  65     -34.557  46.747  10.600  4.00  0.00           C  
ATOM   2058  C1'  DC A  65     -35.969  46.992  11.030  3.00  0.00           C  
ATOM   2059  N1   DC A  65     -36.220  48.346  11.590  5.00  0.00           N  
ATOM   2060  C2   DC A  65     -37.418  49.039  11.090  8.00  0.00           C  
ATOM   2061  O2   DC A  65     -38.277  48.448  10.440  1.00  0.00           O  
ATOM   2062  N3   DC A  65     -37.588  50.376  11.310  9.00  0.00           N  
ATOM   2063  C4   DC A  65     -36.845  50.989  12.220  5.00  0.00           C  
ATOM   2064  N4   DC A  65     -37.027  52.205  12.490  7.00  0.00           N  
ATOM   2065  C5   DC A  65     -35.681  50.359  12.760  8.00  0.00           C  
ATOM   2066  C6   DC A  65     -35.375  49.064  12.420  3.00  0.00           C  
ATOM   2067  OP1  DC A  65     -32.921  43.066  14.880  9.00  0.00           O  
ATOM   2068  OP2  DC A  65     -32.152  45.474  14.860  5.00  0.00           O1-
ATOM   2069  H5   DC A  65     -35.066  50.867  13.540  6.00  0.00           H  
ATOM   2070  H6   DC A  65     -34.559  48.571  12.810  8.00  0.00           H  
ATOM   2071  H1'  DC A  65     -36.580  46.791  10.150  3.00  0.00           H  
ATOM   2072  H2'  DC A  65     -34.014  47.043  11.450  5.00  0.00           H  
ATOM   2073  H3'  DC A  65     -33.563  44.785  10.740  3.00  0.00           H  
ATOM   2074  H4'  DC A  65     -36.243  44.153  10.980  6.00  0.00           H  
ATOM   2075  H41  DC A  65     -37.657  52.705  11.790  9.00  0.00           H  
ATOM   2076  H5'  DC A  65     -35.643  43.968  13.480  5.00  0.00           H  
ATOM   2077  H42  DC A  65     -36.397  52.718  13.100  6.00  0.00           H  
ATOM   2078 H2''  DC A  65     -34.203  47.170   9.710  5.00  0.00           H  
ATOM   2079 H5''  DC A  65     -34.526  43.117  12.360  2.00  0.00           H  
ATOM   2080  P    DC A  66     -33.938  44.662   7.810  2.00  0.00           P  
ATOM   2081  C5'  DC A  66     -35.651  45.811   6.190  2.00  0.00           C  
ATOM   2082  O5'  DC A  66     -34.956  44.611   6.530  9.00  0.00           O  
ATOM   2083  C4'  DC A  66     -36.523  46.507   7.200  7.00  0.00           C  
ATOM   2084  O4'  DC A  66     -36.665  47.924   6.930  9.00  0.00           O  
ATOM   2085  C3'  DC A  66     -37.879  45.878   7.350  1.00  0.00           C  
ATOM   2086  O3'  DC A  66     -38.304  46.008   8.650  3.00  0.00           O  
ATOM   2087  C2'  DC A  66     -38.751  46.789   6.530  3.00  0.00           C  
ATOM   2088  C1'  DC A  66     -38.073  48.105   6.950  1.00  0.00           C  
ATOM   2089  N1   DC A  66     -38.555  49.197   5.990  9.00  0.00           N  
ATOM   2090  C2   DC A  66     -39.219  50.266   6.570  8.00  0.00           C  
ATOM   2091  O2   DC A  66     -39.457  50.354   7.760  9.00  0.00           O  
ATOM   2092  N3   DC A  66     -39.573  51.397   5.820  9.00  0.00           N  
ATOM   2093  C4   DC A  66     -39.266  51.370   4.550  1.00  0.00           C  
ATOM   2094  N4   DC A  66     -39.737  52.377   3.950  6.00  0.00           N  
ATOM   2095  C5   DC A  66     -38.620  50.306   3.920  5.00  0.00           C  
ATOM   2096  C6   DC A  66     -38.259  49.186   4.630  6.00  0.00           C  
ATOM   2097  OP1  DC A  66     -33.332  43.349   7.950  1.00  0.00           O  
ATOM   2098  OP2  DC A  66     -32.978  45.753   7.690  0.00  0.00           O1-
ATOM   2099  H5   DC A  66     -38.372  50.328   2.880  1.00  0.00           H  
ATOM   2100  H6   DC A  66     -37.862  48.269   4.180  2.00  0.00           H  
ATOM   2101  H1'  DC A  66     -38.438  48.303   7.960  3.00  0.00           H  
ATOM   2102  H2'  DC A  66     -38.486  46.602   5.490  2.00  0.00           H  
ATOM   2103  H3'  DC A  66     -37.936  44.813   7.030  6.00  0.00           H  
ATOM   2104  H4'  DC A  66     -35.974  46.313   8.060  8.00  0.00           H  
ATOM   2105  H41  DC A  66     -40.238  53.066   4.510  0.00  0.00           H  
ATOM   2106  H5'  DC A  66     -36.205  45.583   5.240  7.00  0.00           H  
ATOM   2107  H42  DC A  66     -39.771  52.351   2.940  4.00  0.00           H  
ATOM   2108 H2''  DC A  66     -39.808  46.702   6.730  8.00  0.00           H  
ATOM   2109 H5''  DC A  66     -34.938  46.601   5.870  9.00  0.00           H  
ATOM   2110  P    DT A  67     -38.872  44.736   9.420  6.00  0.00           P  
ATOM   2111  C5'  DT A  67     -41.481  44.865   8.700  3.00  0.00           C  
ATOM   2112  O5'  DT A  67     -40.168  44.225   8.720  9.00  0.00           O  
ATOM   2113  C4'  DT A  67     -42.595  43.841   8.600  3.00  0.00           C  
ATOM   2114  O4'  DT A  67     -42.368  43.092   7.420  1.00  0.00           O  
ATOM   2115  C3'  DT A  67     -42.572  42.761   9.680  7.00  0.00           C  
ATOM   2116  O3'  DT A  67     -43.887  42.499  10.100  8.00  0.00           O  
ATOM   2117  C2'  DT A  67     -41.869  41.595   9.080  6.00  0.00           C  
ATOM   2118  C1'  DT A  67     -42.276  41.714   7.670  6.00  0.00           C  
ATOM   2119  N1   DT A  67     -41.307  41.154   6.680  4.00  0.00           N  
ATOM   2120  C2   DT A  67     -41.708  40.084   5.900  2.00  0.00           C  
ATOM   2121  O2   DT A  67     -42.800  39.487   5.890  3.00  0.00           O  
ATOM   2122  N3   DT A  67     -40.836  39.773   4.890  8.00  0.00           N  
ATOM   2123  C4   DT A  67     -39.498  40.070   4.920  9.00  0.00           C  
ATOM   2124  O4   DT A  67     -38.856  39.510   4.010  2.00  0.00           O  
ATOM   2125  C5   DT A  67     -39.062  41.095   5.840  7.00  0.00           C  
ATOM   2126  C6   DT A  67     -39.994  41.622   6.660  4.00  0.00           C  
ATOM   2127  C7   DT A  67     -37.668  41.704   5.990  3.00  0.00           C  
ATOM   2128  OP1  DT A  67     -39.177  45.116  10.800  0.00  0.00           O  
ATOM   2129  OP2  DT A  67     -37.955  43.613   9.190  1.00  0.00           O1-
ATOM   2130  H3   DT A  67     -41.211  39.161   4.190  6.00  0.00           H  
ATOM   2131  H6   DT A  67     -39.751  42.442   7.270  0.00  0.00           H  
ATOM   2132  H1'  DT A  67     -43.301  41.211   7.670  7.00  0.00           H  
ATOM   2133  H2'  DT A  67     -40.797  41.647   9.160  0.00  0.00           H  
ATOM   2134  H3'  DT A  67     -41.952  43.085  10.470  4.00  0.00           H  
ATOM   2135  H4'  DT A  67     -43.532  44.348   8.510  4.00  0.00           H  
ATOM   2136  H5'  DT A  67     -41.610  45.559   7.850  5.00  0.00           H  
ATOM   2137  H71  DT A  67     -36.893  40.943   6.160  2.00  0.00           H  
ATOM   2138  H72  DT A  67     -37.724  42.392   6.880  6.00  0.00           H  
ATOM   2139  H73  DT A  67     -37.373  42.169   5.060  7.00  0.00           H  
ATOM   2140 H2''  DT A  67     -42.230  40.683   9.510  5.00  0.00           H  
ATOM   2141 H5''  DT A  67     -41.638  45.506   9.610  3.00  0.00           H  
ATOM   2142  P    DA A  68     -44.242  41.549  11.340  0.00  0.00           P  
ATOM   2143  C5'  DA A  68     -45.322  39.608   9.800  4.00  0.00           C  
ATOM   2144  O5'  DA A  68     -44.316  40.109  10.660  7.00  0.00           O  
ATOM   2145  C4'  DA A  68     -45.097  38.069   9.550  1.00  0.00           C  
ATOM   2146  O4'  DA A  68     -43.851  37.847   8.760  3.00  0.00           O  
ATOM   2147  C3'  DA A  68     -44.921  37.277  10.850  1.00  0.00           C  
ATOM   2148  O3'  DA A  68     -45.538  35.996  10.690  0.00  0.00           O  
ATOM   2149  C2'  DA A  68     -43.422  37.137  10.910  7.00  0.00           C  
ATOM   2150  C1'  DA A  68     -42.930  36.959   9.390  5.00  0.00           C  
ATOM   2151  N1   DA A  68     -39.033  36.862   6.150  4.00  0.00           N  
ATOM   2152  C2   DA A  68     -40.108  36.097   6.250  1.00  0.00           C  
ATOM   2153  N3   DA A  68     -41.093  36.187   7.190  7.00  0.00           N  
ATOM   2154  C4   DA A  68     -40.737  37.074   8.150  3.00  0.00           C  
ATOM   2155  C5   DA A  68     -39.587  37.713   8.270  2.00  0.00           C  
ATOM   2156  C6   DA A  68     -38.778  37.690   7.170  2.00  0.00           C  
ATOM   2157  N6   DA A  68     -37.582  38.318   7.040  7.00  0.00           N  
ATOM   2158  N7   DA A  68     -39.471  38.483   9.390  7.00  0.00           N  
ATOM   2159  C8   DA A  68     -40.641  38.280   9.910  9.00  0.00           C  
ATOM   2160  N9   DA A  68     -41.475  37.445   9.210  7.00  0.00           N  
ATOM   2161  OP1  DA A  68     -45.609  41.912  11.710  9.00  0.00           O  
ATOM   2162  OP2  DA A  68     -43.207  41.558  12.380  1.00  0.00           O1-
ATOM   2163  H2   DA A  68     -40.109  35.314   5.530  6.00  0.00           H  
ATOM   2164  H8   DA A  68     -40.908  38.617  10.920  8.00  0.00           H  
ATOM   2165  H1'  DA A  68     -43.008  35.965   8.860  9.00  0.00           H  
ATOM   2166  H2'  DA A  68     -42.933  38.001  11.370  4.00  0.00           H  
ATOM   2167  H3'  DA A  68     -45.319  37.873  11.730  8.00  0.00           H  
ATOM   2168  H4'  DA A  68     -45.993  37.613   9.060  2.00  0.00           H  
ATOM   2169  H5'  DA A  68     -45.242  40.144   8.820  8.00  0.00           H  
ATOM   2170  H61  DA A  68     -37.120  38.227   6.140  1.00  0.00           H  
ATOM   2171  H62  DA A  68     -37.144  38.903   7.750  6.00  0.00           H  
ATOM   2172 H2''  DA A  68     -43.165  36.218  11.450  5.00  0.00           H  
ATOM   2173 H5''  DA A  68     -46.304  39.855  10.220  7.00  0.00           H  
ATOM   2174  P    DA A  69     -46.572  35.418  11.790  3.00  0.00           P  
ATOM   2175  C5'  DA A  69     -48.824  36.343  10.640  7.00  0.00           C  
ATOM   2176  O5'  DA A  69     -47.904  36.320  11.750  9.00  0.00           O  
ATOM   2177  C4'  DA A  69     -49.657  37.606  10.460  6.00  0.00           C  
ATOM   2178  O4'  DA A  69     -50.228  37.986  11.800  6.00  0.00           O  
ATOM   2179  C3'  DA A  69     -48.779  38.788  10.060  1.00  0.00           C  
ATOM   2180  O3'  DA A  69     -49.447  39.784   9.270  4.00  0.00           O  
ATOM   2181  C2'  DA A  69     -48.391  39.487  11.390  9.00  0.00           C  
ATOM   2182  C1'  DA A  69     -49.653  39.200  12.240  5.00  0.00           C  
ATOM   2183  N1   DA A  69     -49.492  42.303  16.180  4.00  0.00           N  
ATOM   2184  C2   DA A  69     -49.952  42.494  14.940  4.00  0.00           C  
ATOM   2185  N3   DA A  69     -49.976  41.532  13.980  1.00  0.00           N  
ATOM   2186  C4   DA A  69     -49.468  40.318  14.440  2.00  0.00           C  
ATOM   2187  C5   DA A  69     -48.964  39.953  15.650  8.00  0.00           C  
ATOM   2188  C6   DA A  69     -48.973  41.116  16.560  7.00  0.00           C  
ATOM   2189  N6   DA A  69     -48.498  41.017  17.800  9.00  0.00           N  
ATOM   2190  N7   DA A  69     -48.367  38.701  15.570  1.00  0.00           N  
ATOM   2191  C8   DA A  69     -48.634  38.222  14.380  9.00  0.00           C  
ATOM   2192  N9   DA A  69     -49.341  39.202  13.660  3.00  0.00           N  
ATOM   2193  OP1  DA A  69     -45.890  35.694  13.080  5.00  0.00           O  
ATOM   2194  OP2  DA A  69     -46.843  34.004  11.520  0.00  0.00           O1-
ATOM   2195  H2   DA A  69     -50.151  43.438  14.610  9.00  0.00           H  
ATOM   2196  H8   DA A  69     -48.357  37.228  14.020  3.00  0.00           H  
ATOM   2197  H1'  DA A  69     -50.395  40.032  12.120  0.00  0.00           H  
ATOM   2198  H2'  DA A  69     -47.515  39.035  11.780  3.00  0.00           H  
ATOM   2199  H3'  DA A  69     -47.846  38.497   9.500  7.00  0.00           H  
ATOM   2200  H4'  DA A  69     -50.416  37.470   9.780  7.00  0.00           H  
ATOM   2201  H5'  DA A  69     -49.502  35.480  10.760  9.00  0.00           H  
ATOM   2202  H61  DA A  69     -48.566  41.842  18.370  5.00  0.00           H  
ATOM   2203  H62  DA A  69     -48.190  40.134  18.120  8.00  0.00           H  
ATOM   2204 H2''  DA A  69     -48.171  40.534  11.290  7.00  0.00           H  
ATOM   2205 H5''  DA A  69     -48.297  36.210   9.700  6.00  0.00           H  
ATOM   2206  P    DC A  70     -49.238  39.938   7.790  0.00  0.00           P  
ATOM   2207  C5'  DC A  70     -47.398  41.635   8.250  0.00  0.00           C  
ATOM   2208  O5'  DC A  70     -47.667  40.390   7.650  5.00  0.00           O  
ATOM   2209  C4'  DC A  70     -46.244  42.356   7.580  4.00  0.00           C  
ATOM   2210  O4'  DC A  70     -45.427  41.582   6.720  8.00  0.00           O  
ATOM   2211  C3'  DC A  70     -46.696  43.555   6.780  6.00  0.00           C  
ATOM   2212  O3'  DC A  70     -45.838  44.663   6.910  3.00  0.00           O  
ATOM   2213  C2'  DC A  70     -46.581  43.019   5.370  5.00  0.00           C  
ATOM   2214  C1'  DC A  70     -45.272  42.257   5.430  3.00  0.00           C  
ATOM   2215  N1   DC A  70     -44.824  41.307   4.370  9.00  0.00           N  
ATOM   2216  C2   DC A  70     -43.645  41.529   3.700  4.00  0.00           C  
ATOM   2217  O2   DC A  70     -42.899  42.524   3.900  9.00  0.00           O  
ATOM   2218  N3   DC A  70     -43.294  40.753   2.640  9.00  0.00           N  
ATOM   2219  C4   DC A  70     -44.126  39.850   2.240  1.00  0.00           C  
ATOM   2220  N4   DC A  70     -43.608  39.034   1.350  4.00  0.00           N  
ATOM   2221  C5   DC A  70     -45.374  39.558   2.870  9.00  0.00           C  
ATOM   2222  C6   DC A  70     -45.709  40.400   3.880  9.00  0.00           C  
ATOM   2223  OP1  DC A  70     -50.071  41.053   7.330  2.00  0.00           O  
ATOM   2224  OP2  DC A  70     -49.475  38.602   7.200  2.00  0.00           O1-
ATOM   2225  H5   DC A  70     -46.125  38.803   2.510  6.00  0.00           H  
ATOM   2226  H6   DC A  70     -46.729  40.361   4.270  2.00  0.00           H  
ATOM   2227  H1'  DC A  70     -44.496  42.951   5.510  5.00  0.00           H  
ATOM   2228  H2'  DC A  70     -47.388  42.348   5.200  2.00  0.00           H  
ATOM   2229  H3'  DC A  70     -47.791  43.806   7.020  3.00  0.00           H  
ATOM   2230  H4'  DC A  70     -45.561  42.714   8.410  0.00  0.00           H  
ATOM   2231  H41  DC A  70     -42.666  39.220   0.840  9.00  0.00           H  
ATOM   2232  H5'  DC A  70     -47.173  41.407   9.310  2.00  0.00           H  
ATOM   2233  H42  DC A  70     -44.197  38.344   0.910  6.00  0.00           H  
ATOM   2234 H2''  DC A  70     -46.478  43.718   4.620  5.00  0.00           H  
ATOM   2235 H5''  DC A  70     -48.307  42.177   8.330  3.00  0.00           H  
ATOM   2236  P    DC A  71     -46.022  45.837   7.910  6.00  0.00           P  
ATOM   2237  C5'  DC A  71     -43.874  47.070   6.810  8.00  0.00           C  
ATOM   2238  O5'  DC A  71     -44.597  46.714   7.960  3.00  0.00           O  
ATOM   2239  C4'  DC A  71     -42.883  48.116   7.230  7.00  0.00           C  
ATOM   2240  O4'  DC A  71     -42.495  48.854   6.040  4.00  0.00           O  
ATOM   2241  C3'  DC A  71     -43.424  49.162   8.240  1.00  0.00           C  
ATOM   2242  O3'  DC A  71     -42.394  49.667   9.140  6.00  0.00           O  
ATOM   2243  C2'  DC A  71     -43.785  50.261   7.310  4.00  0.00           C  
ATOM   2244  C1'  DC A  71     -42.588  50.207   6.400  4.00  0.00           C  
ATOM   2245  N1   DC A  71     -42.766  51.111   5.260  8.00  0.00           N  
ATOM   2246  C2   DC A  71     -42.427  52.460   5.460  0.00  0.00           C  
ATOM   2247  O2   DC A  71     -42.119  52.905   6.560  0.00  0.00           O  
ATOM   2248  N3   DC A  71     -42.507  53.400   4.410  3.00  0.00           N  
ATOM   2249  C4   DC A  71     -42.846  52.930   3.240  2.00  0.00           C  
ATOM   2250  N4   DC A  71     -43.038  53.768   2.250  1.00  0.00           N  
ATOM   2251  C5   DC A  71     -43.331  51.584   2.950  9.00  0.00           C  
ATOM   2252  C6   DC A  71     -43.277  50.729   4.040  8.00  0.00           C  
ATOM   2253  OP1  DC A  71     -46.246  45.240   9.290  1.00  0.00           O  
ATOM   2254  OP2  DC A  71     -46.950  46.760   7.290  5.00  0.00           O1-
ATOM   2255  H5   DC A  71     -43.496  51.165   1.970  3.00  0.00           H  
ATOM   2256  H6   DC A  71     -43.374  49.667   3.870  8.00  0.00           H  
ATOM   2257  H1'  DC A  71     -41.734  50.563   6.990  6.00  0.00           H  
ATOM   2258  H2'  DC A  71     -44.666  50.020   6.760  8.00  0.00           H  
ATOM   2259  H3'  DC A  71     -44.279  48.832   8.840  1.00  0.00           H  
ATOM   2260  H4'  DC A  71     -41.997  47.671   7.730  5.00  0.00           H  
ATOM   2261  H41  DC A  71     -42.894  54.803   2.500  3.00  0.00           H  
ATOM   2262  H5'  DC A  71     -44.590  47.514   6.110  6.00  0.00           H  
ATOM   2263  H42  DC A  71     -43.546  53.446   1.430  0.00  0.00           H  
ATOM   2264 H2''  DC A  71     -43.925  51.220   7.700  4.00  0.00           H  
ATOM   2265 H5''  DC A  71     -43.484  46.169   6.310  8.00  0.00           H  
ATOM   2266  P    DC A  72     -42.056  49.050  10.620  8.00  0.00           P  
ATOM   2267  C5'  DC A  72     -42.993  49.197  12.990  2.00  0.00           C  
ATOM   2268  O5'  DC A  72     -43.344  49.166  11.630  7.00  0.00           O  
ATOM   2269  C4'  DC A  72     -44.134  48.923  13.980  3.00  0.00           C  
ATOM   2270  O4'  DC A  72     -45.158  49.989  14.110  1.00  0.00           O  
ATOM   2271  C3'  DC A  72     -44.980  47.661  13.620  2.00  0.00           C  
ATOM   2272  O3'  DC A  72     -45.368  46.959  14.790  4.00  0.00           O  
ATOM   2273  C2'  DC A  72     -46.189  48.325  12.890  9.00  0.00           C  
ATOM   2274  C1'  DC A  72     -46.425  49.465  13.910  8.00  0.00           C  
ATOM   2275  N1   DC A  72     -47.472  50.450  13.560  6.00  0.00           N  
ATOM   2276  C2   DC A  72     -48.695  50.349  14.160  5.00  0.00           C  
ATOM   2277  O2   DC A  72     -48.984  49.399  14.900  4.00  0.00           O  
ATOM   2278  N3   DC A  72     -49.634  51.284  13.860  5.00  0.00           N  
ATOM   2279  C4   DC A  72     -49.322  52.385  13.200  9.00  0.00           C  
ATOM   2280  N4   DC A  72     -50.356  53.187  12.980  2.00  0.00           N  
ATOM   2281  C5   DC A  72     -48.031  52.544  12.650  7.00  0.00           C  
ATOM   2282  C6   DC A  72     -47.124  51.560  12.850  1.00  0.00           C  
ATOM   2283  OP1  DC A  72     -40.956  49.950  11.120  1.00  0.00           O  
ATOM   2284  OP2  DC A  72     -41.787  47.621  10.460  1.00  0.00           O1-
ATOM   2285  H5   DC A  72     -47.805  53.446  12.160  9.00  0.00           H  
ATOM   2286  H6   DC A  72     -46.130  51.675  12.420  5.00  0.00           H  
ATOM   2287  H1'  DC A  72     -46.718  49.000  14.840  7.00  0.00           H  
ATOM   2288  H2'  DC A  72     -45.911  48.637  11.910  9.00  0.00           H  
ATOM   2289  H3'  DC A  72     -44.388  46.918  12.930  9.00  0.00           H  
ATOM   2290  H4'  DC A  72     -43.713  48.791  14.990  0.00  0.00           H  
ATOM   2291  H41  DC A  72     -51.341  52.921  13.280  8.00  0.00           H  
ATOM   2292  H5'  DC A  72     -42.670  50.183  13.190  4.00  0.00           H  
ATOM   2293  H42  DC A  72     -50.263  54.053  12.440  4.00  0.00           H  
ATOM   2294 H2''  DC A  72     -47.014  47.655  12.860  5.00  0.00           H  
ATOM   2295 H5''  DC A  72     -42.176  48.496  13.220  3.00  0.00           H  
ATOM   2296  P    DT A  73     -46.023  45.585  14.820  3.00  0.00           P  
ATOM   2297  C5'  DT A  73     -45.984  43.750  16.830  2.00  0.00           C  
ATOM   2298  O5'  DT A  73     -45.701  45.144  16.390  7.00  0.00           O  
ATOM   2299  C4'  DT A  73     -45.783  43.657  18.300  2.00  0.00           C  
ATOM   2300  O4'  DT A  73     -44.348  43.619  18.580  8.00  0.00           O  
ATOM   2301  C3'  DT A  73     -46.414  44.823  19.140  4.00  0.00           C  
ATOM   2302  O3'  DT A  73     -46.925  44.405  20.430  9.00  0.00           O  
ATOM   2303  C2'  DT A  73     -45.197  45.648  19.370  1.00  0.00           C  
ATOM   2304  C1'  DT A  73     -44.180  44.550  19.620  2.00  0.00           C  
ATOM   2305  N1   DT A  73     -42.829  45.240  19.480  8.00  0.00           N  
ATOM   2306  C2   DT A  73     -42.041  45.287  20.590  8.00  0.00           C  
ATOM   2307  O2   DT A  73     -42.293  44.703  21.590  0.00  0.00           O  
ATOM   2308  N3   DT A  73     -40.856  45.962  20.610  4.00  0.00           N  
ATOM   2309  C4   DT A  73     -40.369  46.482  19.430  6.00  0.00           C  
ATOM   2310  O4   DT A  73     -39.156  46.811  19.370  7.00  0.00           O  
ATOM   2311  C5   DT A  73     -41.273  46.520  18.290  6.00  0.00           C  
ATOM   2312  C6   DT A  73     -42.451  45.953  18.390  0.00  0.00           C  
ATOM   2313  C7   DT A  73     -40.884  47.160  17.020  7.00  0.00           C  
ATOM   2314  OP1  DT A  73     -45.346  44.733  13.840  2.00  0.00           O  
ATOM   2315  OP2  DT A  73     -47.500  45.804  14.790  9.00  0.00           O1-
ATOM   2316  H3   DT A  73     -40.206  45.826  21.320  6.00  0.00           H  
ATOM   2317  H6   DT A  73     -43.099  45.940  17.470  8.00  0.00           H  
ATOM   2318  H1'  DT A  73     -44.169  44.036  20.560  2.00  0.00           H  
ATOM   2319  H2'  DT A  73     -45.086  46.209  18.510  4.00  0.00           H  
ATOM   2320  H3'  DT A  73     -47.186  45.394  18.660  2.00  0.00           H  
ATOM   2321  H4'  DT A  73     -46.312  42.702  18.610  1.00  0.00           H  
ATOM   2322  H5'  DT A  73     -45.493  42.973  16.280  5.00  0.00           H  
ATOM   2323  H71  DT A  73     -40.072  46.521  16.580  8.00  0.00           H  
ATOM   2324  H72  DT A  73     -41.700  47.201  16.260  0.00  0.00           H  
ATOM   2325  H73  DT A  73     -40.551  48.169  17.290  2.00  0.00           H  
ATOM   2326 H2''  DT A  73     -45.178  46.382  20.140  2.00  0.00           H  
ATOM   2327 H5''  DT A  73     -47.029  43.435  16.680  1.00  0.00           H  
ATOM   2328  P    DA A  74     -48.370  43.844  20.680  0.00  0.00           P  
ATOM   2329  C5'  DA A  74     -49.218  43.076  23.000  2.00  0.00           C  
ATOM   2330  O5'  DA A  74     -48.251  43.709  22.250  3.00  0.00           O  
ATOM   2331  C4'  DA A  74     -49.689  43.688  24.250  2.00  0.00           C  
ATOM   2332  O4'  DA A  74     -48.549  43.994  25.130  6.00  0.00           O  
ATOM   2333  C3'  DA A  74     -50.525  44.937  24.070  4.00  0.00           C  
ATOM   2334  O3'  DA A  74     -51.263  45.051  25.290  1.00  0.00           O  
ATOM   2335  C2'  DA A  74     -49.524  46.031  24.090  8.00  0.00           C  
ATOM   2336  C1'  DA A  74     -48.605  45.423  25.300  7.00  0.00           C  
ATOM   2337  N1   DA A  74     -45.201  48.514  27.500  6.00  0.00           N  
ATOM   2338  C2   DA A  74     -46.493  48.236  27.730  0.00  0.00           C  
ATOM   2339  N3   DA A  74     -47.295  47.401  27.100  5.00  0.00           N  
ATOM   2340  C4   DA A  74     -46.665  46.832  26.060  6.00  0.00           C  
ATOM   2341  C5   DA A  74     -45.319  46.935  25.710  2.00  0.00           C  
ATOM   2342  C6   DA A  74     -44.593  47.862  26.520  2.00  0.00           C  
ATOM   2343  N6   DA A  74     -43.356  48.185  26.400  3.00  0.00           N  
ATOM   2344  N7   DA A  74     -45.054  46.101  24.650  2.00  0.00           N  
ATOM   2345  C8   DA A  74     -46.224  45.582  24.280  4.00  0.00           C  
ATOM   2346  N9   DA A  74     -47.209  45.942  25.190  4.00  0.00           N  
ATOM   2347  OP1  DA A  74     -48.434  42.459  20.120  7.00  0.00           O  
ATOM   2348  OP2  DA A  74     -49.343  44.889  20.320  8.00  0.00           O1-
ATOM   2349  H2   DA A  74     -46.860  48.823  28.550  4.00  0.00           H  
ATOM   2350  H8   DA A  74     -46.336  44.854  23.480  3.00  0.00           H  
ATOM   2351  H1'  DA A  74     -48.997  45.737  26.290  7.00  0.00           H  
ATOM   2352  H2'  DA A  74     -48.972  46.192  23.200  2.00  0.00           H  
ATOM   2353  H3'  DA A  74     -51.197  44.900  23.230  4.00  0.00           H  
ATOM   2354  H4'  DA A  74     -50.385  43.037  24.720  5.00  0.00           H  
ATOM   2355  H5'  DA A  74     -48.790  42.039  23.170  9.00  0.00           H  
ATOM   2356  H61  DA A  74     -42.889  48.653  27.170  7.00  0.00           H  
ATOM   2357  H62  DA A  74     -43.036  48.147  25.420  4.00  0.00           H  
ATOM   2358 H2''  DA A  74     -49.879  47.014  24.370  3.00  0.00           H  
ATOM   2359 H5''  DA A  74     -50.197  42.910  22.510  3.00  0.00           H  
ATOM   2360  P    DA A  75     -52.645  45.776  25.450  1.00  0.00           P  
ATOM   2361  C5'  DA A  75     -52.205  48.061  26.770  6.00  0.00           C  
ATOM   2362  O5'  DA A  75     -52.259  47.303  25.510  8.00  0.00           O  
ATOM   2363  C4'  DA A  75     -51.712  49.533  26.660  5.00  0.00           C  
ATOM   2364  O4'  DA A  75     -50.341  49.650  26.700  7.00  0.00           O  
ATOM   2365  C3'  DA A  75     -52.205  50.220  25.380  4.00  0.00           C  
ATOM   2366  O3'  DA A  75     -52.737  51.556  25.690  8.00  0.00           O  
ATOM   2367  C2'  DA A  75     -50.948  50.171  24.520  9.00  0.00           C  
ATOM   2368  C1'  DA A  75     -49.904  50.435  25.630  3.00  0.00           C  
ATOM   2369  N1   DA A  75     -45.331  52.087  26.780  3.00  0.00           N  
ATOM   2370  C2   DA A  75     -46.490  52.246  27.360  7.00  0.00           C  
ATOM   2371  N3   DA A  75     -47.596  51.708  26.990  5.00  0.00           N  
ATOM   2372  C4   DA A  75     -47.458  50.888  25.890  7.00  0.00           C  
ATOM   2373  C5   DA A  75     -46.365  50.660  25.170  2.00  0.00           C  
ATOM   2374  C6   DA A  75     -45.258  51.344  25.700  6.00  0.00           C  
ATOM   2375  N6   DA A  75     -44.000  51.159  25.190  2.00  0.00           N  
ATOM   2376  N7   DA A  75     -46.670  49.791  24.120  3.00  0.00           N  
ATOM   2377  C8   DA A  75     -47.948  49.550  24.190  5.00  0.00           C  
ATOM   2378  N9   DA A  75     -48.500  50.269  25.210  9.00  0.00           N  
ATOM   2379  OP1  DA A  75     -53.303  45.375  26.660  1.00  0.00           O  
ATOM   2380  OP2  DA A  75     -53.357  45.537  24.160  8.00  0.00           O1-
ATOM   2381  H2   DA A  75     -46.404  52.758  28.270  5.00  0.00           H  
ATOM   2382  H8   DA A  75     -48.513  48.937  23.500  0.00  0.00           H  
ATOM   2383  H1'  DA A  75     -49.980  51.415  26.040  1.00  0.00           H  
ATOM   2384  H2'  DA A  75     -50.970  49.245  23.940  3.00  0.00           H  
ATOM   2385  H3'  DA A  75     -53.067  49.694  24.940  5.00  0.00           H  
ATOM   2386  H4'  DA A  75     -52.150  50.056  27.570  1.00  0.00           H  
ATOM   2387  H5'  DA A  75     -51.543  47.620  27.550  8.00  0.00           H  
ATOM   2388  H61  DA A  75     -43.250  51.803  25.510  5.00  0.00           H  
ATOM   2389  H62  DA A  75     -43.722  50.474  24.480  7.00  0.00           H  
ATOM   2390 H2''  DA A  75     -50.991  51.040  23.870  7.00  0.00           H  
ATOM   2391 H5''  DA A  75     -53.227  48.049  27.210  1.00  0.00           H  
ATOM   2392  P    DC A  76     -53.877  52.131  24.840  3.00  0.00           P  
ATOM   2393  C5'  DC A  76     -52.486  53.487  22.900  6.00  0.00           C  
ATOM   2394  O5'  DC A  76     -53.445  52.474  23.340  1.00  0.00           O  
ATOM   2395  C4'  DC A  76     -52.035  53.324  21.400  2.00  0.00           C  
ATOM   2396  O4'  DC A  76     -51.390  52.071  21.280  9.00  0.00           O  
ATOM   2397  C3'  DC A  76     -53.091  53.366  20.270  0.00  0.00           C  
ATOM   2398  O3'  DC A  76     -52.467  53.912  19.140  8.00  0.00           O  
ATOM   2399  C2'  DC A  76     -53.437  51.874  20.150  1.00  0.00           C  
ATOM   2400  C1'  DC A  76     -52.008  51.325  20.290  3.00  0.00           C  
ATOM   2401  N1   DC A  76     -52.055  49.875  20.730  3.00  0.00           N  
ATOM   2402  C2   DC A  76     -52.030  48.897  19.760  0.00  0.00           C  
ATOM   2403  O2   DC A  76     -52.002  49.249  18.560  6.00  0.00           O  
ATOM   2404  N3   DC A  76     -52.197  47.549  20.100  1.00  0.00           N  
ATOM   2405  C4   DC A  76     -52.547  47.239  21.350  6.00  0.00           C  
ATOM   2406  N4   DC A  76     -52.636  46.017  21.620  7.00  0.00           N  
ATOM   2407  C5   DC A  76     -52.863  48.260  22.300  7.00  0.00           C  
ATOM   2408  C6   DC A  76     -52.630  49.552  21.930  6.00  0.00           C  
ATOM   2409  OP1  DC A  76     -54.346  53.384  25.410  2.00  0.00           O  
ATOM   2410  OP2  DC A  76     -54.841  51.023  24.790  2.00  0.00           O1-
ATOM   2411  H5   DC A  76     -53.327  48.076  23.260  3.00  0.00           H  
ATOM   2412  H6   DC A  76     -52.862  50.339  22.590  7.00  0.00           H  
ATOM   2413  H1'  DC A  76     -51.394  51.363  19.480  3.00  0.00           H  
ATOM   2414  H2'  DC A  76     -54.117  51.546  20.940  2.00  0.00           H  
ATOM   2415  H3'  DC A  76     -53.938  53.948  20.580  6.00  0.00           H  
ATOM   2416  H4'  DC A  76     -51.302  54.150  21.290  4.00  0.00           H  
ATOM   2417  H41  DC A  76     -52.435  45.289  20.930  1.00  0.00           H  
ATOM   2418  H5'  DC A  76     -51.595  53.438  23.550  7.00  0.00           H  
ATOM   2419  H42  DC A  76     -52.702  45.750  22.620  1.00  0.00           H  
ATOM   2420 H2''  DC A  76     -53.796  51.600  19.190  1.00  0.00           H  
ATOM   2421 H5''  DC A  76     -52.947  54.474  23.010  4.00  0.00           H  
ATOM   2422  P    DC A  77     -53.054  54.138  17.730  6.00  0.00           P  
ATOM   2423  C5'  DC A  77     -52.012  56.385  16.660  0.00  0.00           C  
ATOM   2424  O5'  DC A  77     -51.978  54.959  16.840  6.00  0.00           O  
ATOM   2425  C4'  DC A  77     -50.649  56.938  16.140  9.00  0.00           C  
ATOM   2426  O4'  DC A  77     -49.522  56.635  17.040  9.00  0.00           O  
ATOM   2427  C3'  DC A  77     -50.171  56.431  14.800  0.00  0.00           C  
ATOM   2428  O3'  DC A  77     -50.918  57.231  13.750  3.00  0.00           O  
ATOM   2429  C2'  DC A  77     -48.660  56.694  14.820  4.00  0.00           C  
ATOM   2430  C1'  DC A  77     -48.297  56.423  16.300  7.00  0.00           C  
ATOM   2431  N1   DC A  77     -47.851  55.046  16.530  8.00  0.00           N  
ATOM   2432  C2   DC A  77     -46.404  54.788  16.490  6.00  0.00           C  
ATOM   2433  O2   DC A  77     -45.545  55.675  16.460  5.00  0.00           O  
ATOM   2434  N3   DC A  77     -45.953  53.547  16.540  5.00  0.00           N  
ATOM   2435  C4   DC A  77     -46.768  52.554  16.540  4.00  0.00           C  
ATOM   2436  N4   DC A  77     -46.306  51.398  16.730  6.00  0.00           N  
ATOM   2437  C5   DC A  77     -48.188  52.711  16.380  2.00  0.00           C  
ATOM   2438  C6   DC A  77     -48.644  53.961  16.550  6.00  0.00           C  
ATOM   2439  OP1  DC A  77     -54.219  55.032  17.850  8.00  0.00           O  
ATOM   2440  OP2  DC A  77     -53.292  52.861  16.990  8.00  0.00           O1-
ATOM   2441  H5   DC A  77     -48.875  51.857  16.220  8.00  0.00           H  
ATOM   2442  H6   DC A  77     -49.788  54.025  16.630  7.00  0.00           H  
ATOM   2443  H1'  DC A  77     -47.538  57.131  16.750  1.00  0.00           H  
ATOM   2444  H2'  DC A  77     -48.178  56.043  14.100  2.00  0.00           H  
ATOM   2445  H3'  DC A  77     -50.371  55.334  14.670  4.00  0.00           H  
ATOM   2446  H4'  DC A  77     -50.804  58.039  16.060  4.00  0.00           H  
ATOM   2447  H41  DC A  77     -45.262  51.437  16.990  7.00  0.00           H  
ATOM   2448  H5'  DC A  77     -52.311  56.850  17.590  3.00  0.00           H  
ATOM   2449  H42  DC A  77     -46.922  50.601  16.890  9.00  0.00           H  
ATOM   2450 H2''  DC A  77     -48.654  57.778  14.580  8.00  0.00           H  
ATOM   2451 H5''  DC A  77     -52.826  56.677  15.980  9.00  0.00           H  
ATOM   2452  P    DC A  78     -51.697  56.513  12.490  1.00  0.00           P  
ATOM   2453  C5'  DC A  78     -50.854  58.523  10.940  1.00  0.00           C  
ATOM   2454  O5'  DC A  78     -51.961  57.811  11.550  5.00  0.00           O  
ATOM   2455  C4'  DC A  78     -51.256  59.423   9.750  9.00  0.00           C  
ATOM   2456  O4'  DC A  78     -50.114  60.088   9.270  3.00  0.00           O  
ATOM   2457  C3'  DC A  78     -51.740  58.550   8.600  8.00  0.00           C  
ATOM   2458  O3'  DC A  78     -52.666  59.273   7.710  7.00  0.00           O  
ATOM   2459  C2'  DC A  78     -50.527  58.380   7.740  4.00  0.00           C  
ATOM   2460  C1'  DC A  78     -50.006  59.840   7.880  6.00  0.00           C  
ATOM   2461  N1   DC A  78     -48.593  59.846   7.420  6.00  0.00           N  
ATOM   2462  C2   DC A  78     -48.168  60.393   6.190  2.00  0.00           C  
ATOM   2463  O2   DC A  78     -48.973  60.920   5.440  1.00  0.00           O  
ATOM   2464  N3   DC A  78     -46.901  60.235   5.760  3.00  0.00           N  
ATOM   2465  C4   DC A  78     -46.051  59.568   6.420  8.00  0.00           C  
ATOM   2466  N4   DC A  78     -44.899  59.342   5.910  3.00  0.00           N  
ATOM   2467  C5   DC A  78     -46.420  58.945   7.700  8.00  0.00           C  
ATOM   2468  C6   DC A  78     -47.608  59.212   8.210  4.00  0.00           C  
ATOM   2469  OP1  DC A  78     -52.982  55.912  12.890  9.00  0.00           O  
ATOM   2470  OP2  DC A  78     -50.765  55.690  11.730  4.00  0.00           O1-
ATOM   2471  H5   DC A  78     -45.627  58.430   8.260  8.00  0.00           H  
ATOM   2472  H6   DC A  78     -47.903  58.809   9.150  6.00  0.00           H  
ATOM   2473  H1'  DC A  78     -50.565  60.471   7.180  5.00  0.00           H  
ATOM   2474  H2'  DC A  78     -49.899  57.669   8.170  0.00  0.00           H  
ATOM   2475  H3'  DC A  78     -52.152  57.645   8.980  9.00  0.00           H  
ATOM   2476  H4'  DC A  78     -52.004  60.080  10.060  2.00  0.00           H  
ATOM   2477  H41  DC A  78     -44.716  59.666   4.990  1.00  0.00           H  
ATOM   2478  H5'  DC A  78     -50.139  57.788  10.700  8.00  0.00           H  
ATOM   2479  H42  DC A  78     -44.248  58.929   6.540  3.00  0.00           H  
ATOM   2480 H2''  DC A  78     -50.813  58.146   6.710  8.00  0.00           H  
ATOM   2481 H5''  DC A  78     -50.432  59.112  11.760  7.00  0.00           H  
ATOM   2482  P    DT A  79     -54.072  59.939   8.100  7.00  0.00           P  
ATOM   2483  C5'  DT A  79     -53.370  62.138   6.840  2.00  0.00           C  
ATOM   2484  O5'  DT A  79     -54.245  61.019   6.890  6.00  0.00           O  
ATOM   2485  C4'  DT A  79     -53.593  62.833   5.500  4.00  0.00           C  
ATOM   2486  O4'  DT A  79     -54.999  62.887   5.140  4.00  0.00           O  
ATOM   2487  C3'  DT A  79     -53.036  64.272   5.370  7.00  0.00           C  
ATOM   2488  O3'  DT A  79     -52.598  64.462   4.080  7.00  0.00           O  
ATOM   2489  C2'  DT A  79     -54.280  65.037   5.570  3.00  0.00           C  
ATOM   2490  C1'  DT A  79     -55.378  64.202   5.010  5.00  0.00           C  
ATOM   2491  N1   DT A  79     -56.667  64.576   5.510  7.00  0.00           N  
ATOM   2492  C2   DT A  79     -57.410  65.578   4.880  1.00  0.00           C  
ATOM   2493  O2   DT A  79     -57.114  66.067   3.800  3.00  0.00           O  
ATOM   2494  N3   DT A  79     -58.575  65.964   5.480  8.00  0.00           N  
ATOM   2495  C4   DT A  79     -59.066  65.534   6.650  6.00  0.00           C  
ATOM   2496  O4   DT A  79     -60.059  66.183   7.030  7.00  0.00           O  
ATOM   2497  C5   DT A  79     -58.300  64.504   7.240  9.00  0.00           C  
ATOM   2498  C6   DT A  79     -57.162  64.072   6.690  1.00  0.00           C  
ATOM   2499  C7   DT A  79     -58.723  63.967   8.590  4.00  0.00           C  
ATOM   2500  OP1  DT A  79     -55.156  58.938   7.950  2.00  0.00           O  
ATOM   2501  OP2  DT A  79     -54.026  60.738   9.350  9.00  0.00           O1-
ATOM   2502  H3   DT A  79     -59.075  66.735   5.040  8.00  0.00           H  
ATOM   2503  H6   DT A  79     -56.662  63.208   7.220  0.00  0.00           H  
ATOM   2504  H1'  DT A  79     -55.371  64.398   3.970  7.00  0.00           H  
ATOM   2505  H2'  DT A  79     -54.428  65.216   6.620  3.00  0.00           H  
ATOM   2506  H3'  DT A  79     -52.213  64.475   6.050  1.00  0.00           H  
ATOM   2507  H4'  DT A  79     -53.127  62.130   4.800  0.00  0.00           H  
ATOM   2508  H5'  DT A  79     -52.347  61.664   6.920  1.00  0.00           H  
ATOM   2509  H71  DT A  79     -59.166  64.738   9.160  9.00  0.00           H  
ATOM   2510  H72  DT A  79     -59.539  63.249   8.330  4.00  0.00           H  
ATOM   2511  H73  DT A  79     -57.964  63.544   9.130  7.00  0.00           H  
ATOM   2512 H2''  DT A  79     -54.169  66.004   5.110  4.00  0.00           H  
ATOM   2513 H5''  DT A  79     -53.426  62.841   7.700  4.00  0.00           H  
ATOM   2514  P    DA A  80     -51.182  63.934   3.480  5.00  0.00           P  
ATOM   2515  C5'  DA A  80     -49.673  66.034   3.750  6.00  0.00           C  
ATOM   2516  O5'  DA A  80     -50.033  64.795   4.260  6.00  0.00           O  
ATOM   2517  C4'  DA A  80     -50.749  66.989   3.290  6.00  0.00           C  
ATOM   2518  O4'  DA A  80     -51.755  67.039   4.250  9.00  0.00           O  
ATOM   2519  C3'  DA A  80     -50.223  68.479   3.060  5.00  0.00           C  
ATOM   2520  O3'  DA A  80     -51.021  69.214   2.150  1.00  0.00           O  
ATOM   2521  C2'  DA A  80     -50.438  68.979   4.470  0.00  0.00           C  
ATOM   2522  C1'  DA A  80     -51.697  68.246   4.970  8.00  0.00           C  
ATOM   2523  N1   DA A  80     -53.654  69.276   9.480  7.00  0.00           N  
ATOM   2524  C2   DA A  80     -53.946  69.850   8.270  5.00  0.00           C  
ATOM   2525  N3   DA A  80     -53.337  69.536   7.120  9.00  0.00           N  
ATOM   2526  C4   DA A  80     -52.341  68.605   7.310  6.00  0.00           C  
ATOM   2527  C5   DA A  80     -52.006  67.925   8.460  9.00  0.00           C  
ATOM   2528  C6   DA A  80     -52.729  68.346   9.630  2.00  0.00           C  
ATOM   2529  N6   DA A  80     -52.734  67.788  10.820  6.00  0.00           N  
ATOM   2530  N7   DA A  80     -51.054  66.861   8.240  6.00  0.00           N  
ATOM   2531  C8   DA A  80     -50.820  67.032   6.990  6.00  0.00           C  
ATOM   2532  N9   DA A  80     -51.620  67.954   6.370  4.00  0.00           N  
ATOM   2533  OP1  DA A  80     -51.138  64.333   2.060  4.00  0.00           O  
ATOM   2534  OP2  DA A  80     -50.981  62.538   3.880  1.00  0.00           O1-
ATOM   2535  H2   DA A  80     -54.679  70.688   8.230  2.00  0.00           H  
ATOM   2536  H8   DA A  80     -50.187  66.410   6.350  7.00  0.00           H  
ATOM   2537  H1'  DA A  80     -52.680  68.736   4.720  9.00  0.00           H  
ATOM   2538  H2'  DA A  80     -49.536  68.760   4.940  1.00  0.00           H  
ATOM   2539  H3'  DA A  80     -49.119  68.495   2.690  0.00  0.00           H  
ATOM   2540  H4'  DA A  80     -51.033  66.636   2.270  1.00  0.00           H  
ATOM   2541  H5'  DA A  80     -48.908  65.873   2.980  3.00  0.00           H  
ATOM   2542  H61  DA A  80     -53.439  67.928  11.500  8.00  0.00           H  
ATOM   2543  H62  DA A  80     -52.078  67.038  11.000  2.00  0.00           H  
ATOM   2544 H2''  DA A  80     -50.578  70.021   4.550  4.00  0.00           H  
ATOM   2545 H5''  DA A  80     -49.103  66.488   4.590  6.00  0.00           H  
ATOM   2546  P    DA A  81     -50.643  70.722   1.660  0.00  0.00           P  
ATOM   2547  C5'  DA A  81     -52.059  72.422   3.200  9.00  0.00           C  
ATOM   2548  O5'  DA A  81     -50.768  71.926   2.720  4.00  0.00           O  
ATOM   2549  C4'  DA A  81     -52.023  72.969   4.660  2.00  0.00           C  
ATOM   2550  O4'  DA A  81     -51.796  72.030   5.700  7.00  0.00           O  
ATOM   2551  C3'  DA A  81     -51.081  74.118   4.920  0.00  0.00           C  
ATOM   2552  O3'  DA A  81     -51.856  75.247   5.220  7.00  0.00           O  
ATOM   2553  C2'  DA A  81     -50.377  73.663   6.220  4.00  0.00           C  
ATOM   2554  C1'  DA A  81     -51.499  72.808   6.820  5.00  0.00           C  
ATOM   2555  N1   DA A  81     -52.089  71.154  11.780  1.00  0.00           N  
ATOM   2556  C2   DA A  81     -52.781  72.069  11.080  2.00  0.00           C  
ATOM   2557  N3   DA A  81     -52.573  72.400   9.800  4.00  0.00           N  
ATOM   2558  C4   DA A  81     -51.501  71.791   9.230  3.00  0.00           C  
ATOM   2559  C5   DA A  81     -50.690  70.857   9.890  1.00  0.00           C  
ATOM   2560  C6   DA A  81     -51.037  70.529  11.200  6.00  0.00           C  
ATOM   2561  N6   DA A  81     -50.334  69.699  11.980  9.00  0.00           N  
ATOM   2562  N7   DA A  81     -49.755  70.422   8.950  5.00  0.00           N  
ATOM   2563  C8   DA A  81     -49.877  71.212   7.880  7.00  0.00           C  
ATOM   2564  N9   DA A  81     -51.002  71.932   7.940  3.00  0.00           N  
ATOM   2565  OP1  DA A  81     -51.529  71.064   0.510  7.00  0.00           O  
ATOM   2566  OP2  DA A  81     -49.217  70.658   1.250  0.00  0.00           O1-
ATOM   2567  H2   DA A  81     -53.592  72.467  11.650  6.00  0.00           H  
ATOM   2568  H8   DA A  81     -49.140  71.139   6.990  4.00  0.00           H  
ATOM   2569  H1'  DA A  81     -52.350  73.462   7.060  1.00  0.00           H  
ATOM   2570  H2'  DA A  81     -49.457  73.195   5.940  1.00  0.00           H  
ATOM   2571  H3'  DA A  81     -50.435  74.402   4.090  7.00  0.00           H  
ATOM   2572  H4'  DA A  81     -53.027  73.278   4.960  9.00  0.00           H  
ATOM   2573  H5'  DA A  81     -52.849  71.643   3.080  9.00  0.00           H  
ATOM   2574  H61  DA A  81     -50.612  69.653  12.900  6.00  0.00           H  
ATOM   2575  H62  DA A  81     -49.530  69.320  11.580  7.00  0.00           H  
ATOM   2576 H2''  DA A  81     -50.203  74.436   6.890  1.00  0.00           H  
ATOM   2577 H5''  DA A  81     -52.464  73.259   2.520  4.00  0.00           H  
ATOM   2578  P    DC A  82     -51.196  76.754   5.330  4.00  0.00           P  
ATOM   2579  C5'  DC A  82     -52.954  77.674   7.120  3.00  0.00           C  
ATOM   2580  O5'  DC A  82     -51.579  77.303   6.830  5.00  0.00           O  
ATOM   2581  C4'  DC A  82     -53.287  77.878   8.530  7.00  0.00           C  
ATOM   2582  O4'  DC A  82     -52.928  76.559   9.150  9.00  0.00           O  
ATOM   2583  C3'  DC A  82     -52.648  79.025   9.380  7.00  0.00           C  
ATOM   2584  O3'  DC A  82     -53.736  79.615  10.130  5.00  0.00           O  
ATOM   2585  C2'  DC A  82     -51.557  78.262  10.050  3.00  0.00           C  
ATOM   2586  C1'  DC A  82     -52.311  76.956  10.380  3.00  0.00           C  
ATOM   2587  N1   DC A  82     -51.429  75.865  10.740  9.00  0.00           N  
ATOM   2588  C2   DC A  82     -51.620  75.047  11.940  9.00  0.00           C  
ATOM   2589  O2   DC A  82     -52.636  75.107  12.660  6.00  0.00           O  
ATOM   2590  N3   DC A  82     -50.708  74.169  12.240  9.00  0.00           N  
ATOM   2591  C4   DC A  82     -49.712  73.916  11.420  0.00  0.00           C  
ATOM   2592  N4   DC A  82     -48.932  73.002  11.910  1.00  0.00           N  
ATOM   2593  C5   DC A  82     -49.468  74.604  10.220  1.00  0.00           C  
ATOM   2594  C6   DC A  82     -50.377  75.564   9.890  4.00  0.00           C  
ATOM   2595  OP1  DC A  82     -51.898  77.663   4.430  3.00  0.00           O  
ATOM   2596  OP2  DC A  82     -49.699  76.678   5.240  5.00  0.00           O1-
ATOM   2597  H5   DC A  82     -48.605  74.435   9.620  4.00  0.00           H  
ATOM   2598  H6   DC A  82     -50.232  76.053   8.910  5.00  0.00           H  
ATOM   2599  H1'  DC A  82     -53.056  77.253  11.160  1.00  0.00           H  
ATOM   2600  H2'  DC A  82     -50.701  78.053   9.460  3.00  0.00           H  
ATOM   2601  H3'  DC A  82     -52.317  79.785   8.680  5.00  0.00           H  
ATOM   2602  H4'  DC A  82     -54.306  78.040   8.440  9.00  0.00           H  
ATOM   2603  H41  DC A  82     -49.090  72.564  12.750  3.00  0.00           H  
ATOM   2604  H5'  DC A  82     -53.542  76.816   6.760  6.00  0.00           H  
ATOM   2605  H42  DC A  82     -48.079  72.881  11.400  5.00  0.00           H  
ATOM   2606 H2''  DC A  82     -51.195  78.785  11.000  0.00  0.00           H  
ATOM   2607 H5''  DC A  82     -53.319  78.527   6.560  1.00  0.00           H  
ATOM   2608  P    DC A  83     -53.527  80.583  11.280  9.00  0.00           P  
ATOM   2609  C5'  DC A  83     -54.880  78.891  12.980  5.00  0.00           C  
ATOM   2610  O5'  DC A  83     -53.639  79.525  12.530  2.00  0.00           O  
ATOM   2611  C4'  DC A  83     -54.650  78.301  14.420  4.00  0.00           C  
ATOM   2612  O4'  DC A  83     -53.529  77.401  14.430  5.00  0.00           O  
ATOM   2613  C3'  DC A  83     -54.334  79.429  15.360  5.00  0.00           C  
ATOM   2614  O3'  DC A  83     -55.023  79.376  16.600  7.00  0.00           O  
ATOM   2615  C2'  DC A  83     -52.816  79.248  15.510  9.00  0.00           C  
ATOM   2616  C1'  DC A  83     -52.632  77.762  15.510  9.00  0.00           C  
ATOM   2617  N1   DC A  83     -51.252  77.354  15.130  7.00  0.00           N  
ATOM   2618  C2   DC A  83     -50.632  76.329  15.870  5.00  0.00           C  
ATOM   2619  O2   DC A  83     -51.082  76.000  16.970  3.00  0.00           O  
ATOM   2620  N3   DC A  83     -49.423  75.849  15.520  1.00  0.00           N  
ATOM   2621  C4   DC A  83     -48.922  76.286  14.400  7.00  0.00           C  
ATOM   2622  N4   DC A  83     -47.748  75.748  14.010  5.00  0.00           N  
ATOM   2623  C5   DC A  83     -49.577  77.186  13.560  0.00  0.00           C  
ATOM   2624  C6   DC A  83     -50.774  77.716  13.900  7.00  0.00           C  
ATOM   2625  OP1  DC A  83     -54.698  81.484  11.330  9.00  0.00           O  
ATOM   2626  OP2  DC A  83     -52.191  81.234  11.260  4.00  0.00           O1-
ATOM   2627  H5   DC A  83     -49.087  77.443  12.600  6.00  0.00           H  
ATOM   2628  H6   DC A  83     -51.215  78.543  13.370  5.00  0.00           H  
ATOM   2629  H1'  DC A  83     -52.998  77.282  16.480  7.00  0.00           H  
ATOM   2630  H2'  DC A  83     -52.290  79.680  14.660  1.00  0.00           H  
ATOM   2631  H3'  DC A  83     -54.576  80.378  14.960  4.00  0.00           H  
ATOM   2632  H4'  DC A  83     -55.455  77.743  14.710  0.00  0.00           H  
ATOM   2633  H41  DC A  83     -47.295  74.949  14.520  4.00  0.00           H  
ATOM   2634  H5'  DC A  83     -55.152  78.124  12.240  7.00  0.00           H  
ATOM   2635  H42  DC A  83     -47.303  76.108  13.180  8.00  0.00           H  
ATOM   2636 H2''  DC A  83     -52.429  79.611  16.420  9.00  0.00           H  
ATOM   2637 H5''  DC A  83     -55.652  79.676  13.140  9.00  0.00           H  
ATOM   2638  P    DC A  84     -54.992  80.649  17.670  2.00  0.00           P  
ATOM   2639  C5'  DC A  84     -54.921  79.423  20.040  5.00  0.00           C  
ATOM   2640  O5'  DC A  84     -54.262  80.045  19.000  8.00  0.00           O  
ATOM   2641  C4'  DC A  84     -53.959  78.856  21.080  4.00  0.00           C  
ATOM   2642  O4'  DC A  84     -52.955  78.150  20.460  8.00  0.00           O  
ATOM   2643  C3'  DC A  84     -53.353  79.927  22.020  3.00  0.00           C  
ATOM   2644  O3'  DC A  84     -53.750  79.764  23.360  4.00  0.00           O  
ATOM   2645  C2'  DC A  84     -51.881  79.825  21.850  7.00  0.00           C  
ATOM   2646  C1'  DC A  84     -51.709  78.487  21.100  5.00  0.00           C  
ATOM   2647  N1   DC A  84     -50.644  78.402  20.050  2.00  0.00           N  
ATOM   2648  C2   DC A  84     -49.478  77.677  20.330  5.00  0.00           C  
ATOM   2649  O2   DC A  84     -49.267  76.943  21.350  4.00  0.00           O  
ATOM   2650  N3   DC A  84     -48.550  77.604  19.380  4.00  0.00           N  
ATOM   2651  C4   DC A  84     -48.711  78.249  18.230  5.00  0.00           C  
ATOM   2652  N4   DC A  84     -47.659  78.042  17.400  6.00  0.00           N  
ATOM   2653  C5   DC A  84     -49.800  79.072  17.940  2.00  0.00           C  
ATOM   2654  C6   DC A  84     -50.796  79.135  18.830  7.00  0.00           C  
ATOM   2655  OP1  DC A  84     -56.374  81.043  18.060  9.00  0.00           O  
ATOM   2656  OP2  DC A  84     -54.116  81.747  17.200  5.00  0.00           O1-
ATOM   2657  H5   DC A  84     -49.963  79.614  16.960  1.00  0.00           H  
ATOM   2658  H6   DC A  84     -51.631  79.798  18.730  7.00  0.00           H  
ATOM   2659  H1'  DC A  84     -51.452  77.728  21.860  2.00  0.00           H  
ATOM   2660  H2'  DC A  84     -51.587  80.600  21.150  2.00  0.00           H  
ATOM   2661  H3'  DC A  84     -53.846  80.844  21.570  8.00  0.00           H  
ATOM   2662  H4'  DC A  84     -54.471  78.126  21.690  4.00  0.00           H  
ATOM   2663  H41  DC A  84     -46.863  77.457  17.650  4.00  0.00           H  
ATOM   2664  H5'  DC A  84     -55.477  78.618  19.670  1.00  0.00           H  
ATOM   2665  H42  DC A  84     -47.598  78.493  16.580  0.00  0.00           H  
ATOM   2666 H2''  DC A  84     -51.392  79.863  22.800  1.00  0.00           H  
ATOM   2667 H5''  DC A  84     -55.581  80.124  20.440  1.00  0.00           H  
ATOM   2668  P    DT A  85     -53.778  80.947  24.470  7.00  0.00           P  
ATOM   2669  C5'  DT A  85     -51.847  80.229  26.070  4.00  0.00           C  
ATOM   2670  O5'  DT A  85     -52.340  81.116  25.080  9.00  0.00           O  
ATOM   2671  C4'  DT A  85     -50.339  80.215  26.230  5.00  0.00           C  
ATOM   2672  O4'  DT A  85     -49.607  79.758  25.040  8.00  0.00           O  
ATOM   2673  C3'  DT A  85     -49.711  81.581  26.600  0.00  0.00           C  
ATOM   2674  O3'  DT A  85     -48.522  81.451  27.350  9.00  0.00           O  
ATOM   2675  C2'  DT A  85     -49.363  82.103  25.200  8.00  0.00           C  
ATOM   2676  C1'  DT A  85     -48.763  80.823  24.670  0.00  0.00           C  
ATOM   2677  N1   DT A  85     -48.477  80.822  23.220  6.00  0.00           N  
ATOM   2678  C2   DT A  85     -47.335  80.115  22.830  1.00  0.00           C  
ATOM   2679  O2   DT A  85     -46.595  79.539  23.680  6.00  0.00           O  
ATOM   2680  N3   DT A  85     -47.096  80.115  21.470  2.00  0.00           N  
ATOM   2681  C4   DT A  85     -47.775  80.764  20.530  2.00  0.00           C  
ATOM   2682  O4   DT A  85     -47.314  80.624  19.420  6.00  0.00           O  
ATOM   2683  C5   DT A  85     -48.930  81.478  20.980  7.00  0.00           C  
ATOM   2684  C6   DT A  85     -49.244  81.513  22.310  0.00  0.00           C  
ATOM   2685  C7   DT A  85     -49.751  82.330  19.980  7.00  0.00           C  
ATOM   2686  OP1  DT A  85     -54.626  80.461  25.540  1.00  0.00           O  
ATOM   2687  OP2  DT A  85     -54.223  82.215  23.890  1.00  0.00           O1-
ATOM   2688  H3   DT A  85     -46.444  79.364  21.240  0.00  0.00           H  
ATOM   2689  H6   DT A  85     -50.090  82.097  22.560  2.00  0.00           H  
ATOM   2690  H1'  DT A  85     -47.853  80.651  25.230  1.00  0.00           H  
ATOM   2691  H2'  DT A  85     -50.228  82.262  24.650  5.00  0.00           H  
ATOM   2692  H3'  DT A  85     -50.514  82.142  27.090  8.00  0.00           H  
ATOM   2693  H4'  DT A  85     -50.197  79.590  27.140  1.00  0.00           H  
ATOM   2694  H5'  DT A  85     -52.213  79.231  26.050  1.00  0.00           H  
ATOM   2695  H71  DT A  85     -50.535  82.996  20.370  2.00  0.00           H  
ATOM   2696  H72  DT A  85     -49.042  82.923  19.480  3.00  0.00           H  
ATOM   2697  H73  DT A  85     -50.140  81.662  19.260  4.00  0.00           H  
ATOM   2698 H2''  DT A  85     -48.689  82.917  25.020  0.00  0.00           H  
ATOM   2699 H5''  DT A  85     -52.342  80.516  27.000  2.00  0.00           H  
ATOM   2700  P    DA A  86     -48.246  82.319  28.650  0.00  0.00           P  
ATOM   2701  C5'  DA A  86     -46.542  80.315  29.240  4.00  0.00           C  
ATOM   2702  O5'  DA A  86     -46.744  81.741  29.070  4.00  0.00           O  
ATOM   2703  C4'  DA A  86     -45.296  79.719  28.650  2.00  0.00           C  
ATOM   2704  O4'  DA A  86     -45.372  79.832  27.250  6.00  0.00           O  
ATOM   2705  C3'  DA A  86     -44.062  80.532  29.090  1.00  0.00           C  
ATOM   2706  O3'  DA A  86     -42.910  79.665  28.990  7.00  0.00           O  
ATOM   2707  C2'  DA A  86     -43.961  81.555  28.010  1.00  0.00           C  
ATOM   2708  C1'  DA A  86     -44.341  80.654  26.830  8.00  0.00           C  
ATOM   2709  N1   DA A  86     -43.990  81.512  21.730  2.00  0.00           N  
ATOM   2710  C2   DA A  86     -43.247  80.724  22.520  4.00  0.00           C  
ATOM   2711  N3   DA A  86     -43.300  80.619  23.850  1.00  0.00           N  
ATOM   2712  C4   DA A  86     -44.252  81.427  24.390  4.00  0.00           C  
ATOM   2713  C5   DA A  86     -45.104  82.243  23.670  7.00  0.00           C  
ATOM   2714  C6   DA A  86     -44.914  82.212  22.250  8.00  0.00           C  
ATOM   2715  N6   DA A  86     -45.564  82.952  21.380  6.00  0.00           N  
ATOM   2716  N7   DA A  86     -46.003  82.918  24.500  9.00  0.00           N  
ATOM   2717  C8   DA A  86     -45.748  82.473  25.690  7.00  0.00           C  
ATOM   2718  N9   DA A  86     -44.833  81.502  25.680  1.00  0.00           N  
ATOM   2719  OP1  DA A  86     -49.295  81.948  29.580  7.00  0.00           O  
ATOM   2720  OP2  DA A  86     -48.230  83.763  28.250  2.00  0.00           O1-
ATOM   2721  H2   DA A  86     -42.428  80.228  22.080  5.00  0.00           H  
ATOM   2722  H8   DA A  86     -46.221  82.765  26.580  2.00  0.00           H  
ATOM   2723  H1'  DA A  86     -43.547  80.097  26.470  7.00  0.00           H  
ATOM   2724  H2'  DA A  86     -44.687  82.351  28.100  7.00  0.00           H  
ATOM   2725  H3'  DA A  86     -44.224  80.889  30.150  2.00  0.00           H  
ATOM   2726  H4'  DA A  86     -45.205  78.677  29.000  5.00  0.00           H  
ATOM   2727  H5'  DA A  86     -47.398  79.766  28.800  0.00  0.00           H  
ATOM   2728  H61  DA A  86     -45.522  82.708  20.360  0.00  0.00           H  
ATOM   2729  H62  DA A  86     -46.290  83.532  21.760  7.00  0.00           H  
ATOM   2730 H2''  DA A  86     -42.929  81.823  27.900  3.00  0.00           H  
ATOM   2731 H5''  DA A  86     -46.523  80.108  30.300  1.00  0.00           H  
ATOM   2732  P    DA A  87     -41.565  79.845  29.970  6.00  0.00           P  
ATOM   2733  C5'  DA A  87     -39.658  80.136  28.220  7.00  0.00           C  
ATOM   2734  O5'  DA A  87     -40.537  80.698  29.190  4.00  0.00           O  
ATOM   2735  C4'  DA A  87     -39.182  81.206  27.120  4.00  0.00           C  
ATOM   2736  O4'  DA A  87     -40.302  81.607  26.330  0.00  0.00           O  
ATOM   2737  C3'  DA A  87     -38.580  82.491  27.700  1.00  0.00           C  
ATOM   2738  O3'  DA A  87     -37.518  83.000  26.930  6.00  0.00           O  
ATOM   2739  C2'  DA A  87     -39.682  83.484  27.480  1.00  0.00           C  
ATOM   2740  C1'  DA A  87     -40.112  83.001  26.160  5.00  0.00           C  
ATOM   2741  N1   DA A  87     -42.021  84.663  21.760  9.00  0.00           N  
ATOM   2742  C2   DA A  87     -41.052  83.907  22.010  3.00  0.00           C  
ATOM   2743  N3   DA A  87     -40.652  83.380  23.190  1.00  0.00           N  
ATOM   2744  C4   DA A  87     -41.427  83.827  24.230  0.00  0.00           C  
ATOM   2745  C5   DA A  87     -42.557  84.609  24.100  6.00  0.00           C  
ATOM   2746  C6   DA A  87     -42.856  84.908  22.750  4.00  0.00           C  
ATOM   2747  N6   DA A  87     -44.018  85.438  22.360  9.00  0.00           N  
ATOM   2748  N7   DA A  87     -43.238  84.711  25.340  0.00  0.00           N  
ATOM   2749  C8   DA A  87     -42.430  84.213  26.160  1.00  0.00           C  
ATOM   2750  N9   DA A  87     -41.301  83.585  25.570  2.00  0.00           N  
ATOM   2751  OP1  DA A  87     -40.964  78.536  30.100  9.00  0.00           O  
ATOM   2752  OP2  DA A  87     -41.894  80.642  31.210  5.00  0.00           O1-
ATOM   2753  H2   DA A  87     -40.444  83.682  21.170  3.00  0.00           H  
ATOM   2754  H8   DA A  87     -42.632  84.103  27.220  7.00  0.00           H  
ATOM   2755  H1'  DA A  87     -39.262  83.203  25.480  1.00  0.00           H  
ATOM   2756  H2'  DA A  87     -40.332  83.253  28.300  9.00  0.00           H  
ATOM   2757  H3'  DA A  87     -38.230  82.454  28.740  2.00  0.00           H  
ATOM   2758  H4'  DA A  87     -38.365  80.800  26.490  7.00  0.00           H  
ATOM   2759  H5'  DA A  87     -40.143  79.415  27.630  5.00  0.00           H  
ATOM   2760  H61  DA A  87     -44.270  85.507  21.370  0.00  0.00           H  
ATOM   2761  H62  DA A  87     -44.668  85.568  23.130  5.00  0.00           H  
ATOM   2762 H2''  DA A  87     -39.468  84.543  27.650  0.00  0.00           H  
ATOM   2763 H5''  DA A  87     -38.752  79.692  28.580  7.00  0.00           H  
ATOM   2764  P    DC A  88     -35.954  82.981  27.320  2.00  0.00           P  
ATOM   2765  C5'  DC A  88     -34.724  82.620  25.020  4.00  0.00           C  
ATOM   2766  O5'  DC A  88     -35.352  83.452  26.010  6.00  0.00           O  
ATOM   2767  C4'  DC A  88     -34.756  83.388  23.670  3.00  0.00           C  
ATOM   2768  O4'  DC A  88     -36.098  83.648  23.270  3.00  0.00           O  
ATOM   2769  C3'  DC A  88     -34.015  84.754  23.800  7.00  0.00           C  
ATOM   2770  O3'  DC A  88     -33.197  85.106  22.690  4.00  0.00           O  
ATOM   2771  C2'  DC A  88     -35.271  85.704  23.900  0.00  0.00           C  
ATOM   2772  C1'  DC A  88     -36.314  85.009  22.990  1.00  0.00           C  
ATOM   2773  N1   DC A  88     -37.640  85.497  23.340  8.00  0.00           N  
ATOM   2774  C2   DC A  88     -38.434  86.071  22.340  0.00  0.00           C  
ATOM   2775  O2   DC A  88     -38.160  85.947  21.140  9.00  0.00           O  
ATOM   2776  N3   DC A  88     -39.589  86.768  22.600  5.00  0.00           N  
ATOM   2777  C4   DC A  88     -40.041  86.775  23.880  9.00  0.00           C  
ATOM   2778  N4   DC A  88     -41.114  87.437  24.160  7.00  0.00           N  
ATOM   2779  C5   DC A  88     -39.226  86.178  24.940  7.00  0.00           C  
ATOM   2780  C6   DC A  88     -38.056  85.543  24.670  1.00  0.00           C  
ATOM   2781  OP1  DC A  88     -35.438  81.618  27.670  8.00  0.00           O  
ATOM   2782  OP2  DC A  88     -35.798  84.109  28.290  0.00  0.00           O1-
ATOM   2783  H5   DC A  88     -39.524  86.154  26.000  1.00  0.00           H  
ATOM   2784  H6   DC A  88     -37.531  85.122  25.520  2.00  0.00           H  
ATOM   2785  H1'  DC A  88     -36.180  85.200  21.930  5.00  0.00           H  
ATOM   2786  H2'  DC A  88     -35.639  85.724  24.990  7.00  0.00           H  
ATOM   2787  H3'  DC A  88     -33.346  84.828  24.640  2.00  0.00           H  
ATOM   2788  H4'  DC A  88     -34.335  82.784  22.900  8.00  0.00           H  
ATOM   2789  H41  DC A  88     -41.678  87.871  23.410  1.00  0.00           H  
ATOM   2790  H5'  DC A  88     -35.132  81.639  24.880  7.00  0.00           H  
ATOM   2791  H42  DC A  88     -41.423  87.784  25.040  5.00  0.00           H  
ATOM   2792 H2''  DC A  88     -35.034  86.635  23.450  6.00  0.00           H  
ATOM   2793 H5''  DC A  88     -33.676  82.329  25.420  7.00  0.00           H  
ATOM   2794  P    DC A  89     -32.488  86.493  22.420  5.00  0.00           P  
ATOM   2795  C5'  DC A  89     -33.596  87.251  20.140  3.00  0.00           C  
ATOM   2796  O5'  DC A  89     -33.464  87.476  21.550  5.00  0.00           O  
ATOM   2797  C4'  DC A  89     -34.185  88.401  19.350  4.00  0.00           C  
ATOM   2798  O4'  DC A  89     -35.591  88.453  19.760  0.00  0.00           O  
ATOM   2799  C3'  DC A  89     -33.616  89.814  19.690  3.00  0.00           C  
ATOM   2800  O3'  DC A  89     -33.366  90.493  18.460  6.00  0.00           O  
ATOM   2801  C2'  DC A  89     -34.584  90.471  20.610  6.00  0.00           C  
ATOM   2802  C1'  DC A  89     -35.956  89.763  20.190  7.00  0.00           C  
ATOM   2803  N1   DC A  89     -36.924  89.817  21.350  9.00  0.00           N  
ATOM   2804  C2   DC A  89     -38.110  90.460  21.170  4.00  0.00           C  
ATOM   2805  O2   DC A  89     -38.374  91.080  20.130  4.00  0.00           O  
ATOM   2806  N3   DC A  89     -39.036  90.522  22.160  2.00  0.00           N  
ATOM   2807  C4   DC A  89     -38.736  89.929  23.280  7.00  0.00           C  
ATOM   2808  N4   DC A  89     -39.568  90.197  24.240  3.00  0.00           N  
ATOM   2809  C5   DC A  89     -37.562  89.285  23.620  8.00  0.00           C  
ATOM   2810  C6   DC A  89     -36.673  89.273  22.610  4.00  0.00           C  
ATOM   2811  OP1  DC A  89     -31.377  86.137  21.560  3.00  0.00           O  
ATOM   2812  OP2  DC A  89     -32.074  87.239  23.640  7.00  0.00           O1-
ATOM   2813  H5   DC A  89     -37.403  88.891  24.660  3.00  0.00           H  
ATOM   2814  H6   DC A  89     -35.712  88.812  22.900  6.00  0.00           H  
ATOM   2815  H1'  DC A  89     -36.370  90.305  19.320  8.00  0.00           H  
ATOM   2816  H2'  DC A  89     -34.427  90.278  21.640  7.00  0.00           H  
ATOM   2817  H3'  DC A  89     -32.669  89.630  20.220  6.00  0.00           H  
ATOM   2818  H4'  DC A  89     -34.097  88.207  18.290  5.00  0.00           H  
ATOM   2819  H41  DC A  89     -40.333  90.804  23.940  9.00  0.00           H  
ATOM   2820  H5'  DC A  89     -34.193  86.331  20.060  2.00  0.00           H  
ATOM   2821  H42  DC A  89     -39.276  90.212  25.190  6.00  0.00           H  
ATOM   2822 H2''  DC A  89     -34.545  91.499  20.260  5.00  0.00           H  
ATOM   2823 H5''  DC A  89     -32.654  87.004  19.740  0.00  0.00           H  
ATOM   2824  P   DC3 A  90     -32.628  91.920  18.390  3.00  0.00           P  
ATOM   2825  C5' DC3 A  90     -34.769  93.143  17.470  7.00  0.00           C  
ATOM   2826  O5' DC3 A  90     -33.747  93.036  18.470  6.00  0.00           O  
ATOM   2827  C4' DC3 A  90     -35.889  94.078  17.910  6.00  0.00           C  
ATOM   2828  O4' DC3 A  90     -36.663  93.494  18.910  7.00  0.00           O  
ATOM   2829  C3' DC3 A  90     -35.528  95.442  18.430  4.00  0.00           C  
ATOM   2830  O3' DC3 A  90     -36.091  96.497  17.720  9.00  0.00           O  
ATOM   2831  C2' DC3 A  90     -36.017  95.435  19.860  1.00  0.00           C  
ATOM   2832  C1' DC3 A  90     -37.201  94.514  19.690  8.00  0.00           C  
ATOM   2833  N1  DC3 A  90     -37.734  94.168  21.040  0.00  0.00           N  
ATOM   2834  C2  DC3 A  90     -38.910  94.714  21.500  5.00  0.00           C  
ATOM   2835  O2  DC3 A  90     -39.545  95.460  20.790  8.00  0.00           O  
ATOM   2836  N3  DC3 A  90     -39.318  94.491  22.800  0.00  0.00           N  
ATOM   2837  C4  DC3 A  90     -38.590  93.827  23.600  8.00  0.00           C  
ATOM   2838  N4  DC3 A  90     -38.995  93.664  24.800  7.00  0.00           N  
ATOM   2839  C5  DC3 A  90     -37.365  93.284  23.190  8.00  0.00           C  
ATOM   2840  C6  DC3 A  90     -36.969  93.434  21.920  3.00  0.00           C  
ATOM   2841  OP1 DC3 A  90     -31.913  91.854  17.120  6.00  0.00           O  
ATOM   2842  OP2 DC3 A  90     -31.810  92.117  19.680  6.00  0.00           O  
ATOM   2843 HO3' DC3 A  90     -35.394  97.087  17.560  7.00  0.00           H  
ATOM   2844  H5  DC3 A  90     -36.791  92.759  23.900  1.00  0.00           H  
ATOM   2845  H6  DC3 A  90     -36.034  93.048  21.550  8.00  0.00           H  
ATOM   2846  H1' DC3 A  90     -37.868  95.122  19.220  7.00  0.00           H  
ATOM   2847  H2' DC3 A  90     -35.254  94.924  20.530  2.00  0.00           H  
ATOM   2848  H3' DC3 A  90     -34.454  95.487  18.390  2.00  0.00           H  
ATOM   2849  H4' DC3 A  90     -36.558  94.196  17.090  3.00  0.00           H  
ATOM   2850  H41 DC3 A  90     -38.438  93.218  25.500  1.00  0.00           H  
ATOM   2851  H5' DC3 A  90     -35.287  92.190  17.140  8.00  0.00           H  
ATOM   2852  H42 DC3 A  90     -39.936  94.130  24.930  2.00  0.00           H  
ATOM   2853 H2'' DC3 A  90     -36.156  96.452  20.260  9.00  0.00           H  
ATOM   2854 H5'' DC3 A  90     -34.355  93.478  16.580  5.00  0.00           H  
ATOM   2855  C   CNT A  94     -69.644  53.350  61.740  1.00  0.00           C  
ATOM   2856  C   CNT A  94     -69.092  54.598  61.560  1.00  0.00           C  
ATOM   2857  C   CNT A  94     -68.710  54.927  60.180  0.00  0.00           C  
ATOM   2858  C   CNT A  94     -67.710  55.937  60.040  3.00  0.00           C  
ATOM   2859  C   CNT A  94     -68.789  55.670  62.450  4.00  0.00           C  
ATOM   2860  C   CNT A  94     -67.613  56.429  62.400  8.00  0.00           C  
ATOM   2861  C   CNT A  94     -67.045  56.507  61.130  7.00  0.00           C  
ATOM   2862  C   CNT A  94     -65.753  56.957  61.050  4.00  0.00           C  
ATOM   2863  C   CNT A  94     -66.745  56.741  63.500  8.00  0.00           C  
ATOM   2864  C   CNT A  94     -65.367  56.799  63.380  5.00  0.00           C  
ATOM   2865  C   CNT A  94     -64.860  56.990  62.110  3.00  0.00           C  
ATOM   2866  C   CNT A  94     -63.552  56.649  61.850  5.00  0.00           C  
ATOM   2867  C   CNT A  94     -64.426  56.450  64.400  6.00  0.00           C  
ATOM   2868  C   CNT A  94     -63.329  55.648  64.130  3.00  0.00           C  
ATOM   2869  C   CNT A  94     -62.838  55.813  62.800  8.00  0.00           C  
ATOM   2870  C   CNT A  94     -61.883  54.953  62.250  3.00  0.00           C  
ATOM   2871  C   CNT A  94     -62.818  54.528  64.770  4.00  0.00           C  
ATOM   2872  C   CNT A  94     -62.376  53.394  64.040  2.00  0.00           C  
ATOM   2873  C   CNT A  94     -61.723  53.671  62.780  9.00  0.00           C  
ATOM   2874  C   CNT A  94     -61.512  52.599  61.870  6.00  0.00           C  
ATOM   2875  C   CNT A  94     -62.508  52.085  64.380  4.00  0.00           C  
ATOM   2876  C   CNT A  94     -62.622  51.066  63.410  0.00  0.00           C  
ATOM   2877  C   CNT A  94     -62.105  51.335  62.130  7.00  0.00           C  
ATOM   2878  C   CNT A  94     -62.409  50.523  61.050  0.00  0.00           C  
ATOM   2879  C   CNT A  94     -63.290  49.789  63.570  0.00  0.00           C  
ATOM   2880  C   CNT A  94     -64.046  49.317  62.460  7.00  0.00           C  
ATOM   2881  C   CNT A  94     -63.506  49.639  61.150  7.00  0.00           C  
ATOM   2882  C   CNT A  94     -64.342  49.500  60.000  0.00  0.00           C  
ATOM   2883  C   CNT A  94     -65.299  48.715  62.470  3.00  0.00           C  
ATOM   2884  C   CNT A  94     -66.229  48.839  61.390  8.00  0.00           C  
ATOM   2885  C   CNT A  94     -65.713  49.233  60.090  2.00  0.00           C  
ATOM   2886  C   CNT A  94     -66.596  49.763  59.100  8.00  0.00           C  
ATOM   2887  C   CNT A  94     -67.564  49.096  61.550  5.00  0.00           C  
ATOM   2888  C   CNT A  94     -68.276  50.036  60.840  9.00  0.00           C  
ATOM   2889  C   CNT A  94     -67.812  50.378  59.530  5.00  0.00           C  
ATOM   2890  C   CNT A  94     -68.169  51.571  58.900  6.00  0.00           C  
ATOM   2891  C   CNT A  94     -69.253  50.921  61.280  5.00  0.00           C  
ATOM   2892  C   CNT A  94     -69.374  52.239  60.930  3.00  0.00           C  
ATOM   2893  C   CNT A  94     -68.879  52.565  59.630  9.00  0.00           C  
ATOM   2894  C   CNT A  94     -68.732  53.889  59.190  7.00  0.00           C  
ATOM   2895  C   CNT A  94     -68.179  54.134  57.950  2.00  0.00           C  
ATOM   2896  C   CNT A  94     -67.632  55.395  57.690  9.00  0.00           C  
ATOM   2897  C   CNT A  94     -67.040  55.659  56.470  7.00  0.00           C  
ATOM   2898  C   CNT A  94     -66.156  56.747  56.290  0.00  0.00           C  
ATOM   2899  C   CNT A  94     -67.281  56.259  58.740  8.00  0.00           C  
ATOM   2900  C   CNT A  94     -66.088  57.037  58.660  5.00  0.00           C  
ATOM   2901  C   CNT A  94     -65.588  57.329  57.410  2.00  0.00           C  
ATOM   2902  C   CNT A  94     -64.333  57.910  57.300  8.00  0.00           C  
ATOM   2903  C   CNT A  94     -65.273  57.248  59.770  4.00  0.00           C  
ATOM   2904  C   CNT A  94     -63.890  57.335  59.580  3.00  0.00           C  
ATOM   2905  C   CNT A  94     -63.409  57.772  58.360  0.00  0.00           C  
ATOM   2906  C   CNT A  94     -62.012  57.577  58.130  4.00  0.00           C  
ATOM   2907  C   CNT A  94     -63.041  56.843  60.590  6.00  0.00           C  
ATOM   2908  C   CNT A  94     -61.842  56.334  60.180  8.00  0.00           C  
ATOM   2909  C   CNT A  94     -61.363  56.640  58.950  6.00  0.00           C  
ATOM   2910  C   CNT A  94     -60.433  55.736  58.430  5.00  0.00           C  
ATOM   2911  C   CNT A  94     -61.327  55.249  60.980  4.00  0.00           C  
ATOM   2912  C   CNT A  94     -60.741  54.197  60.230  3.00  0.00           C  
ATOM   2913  C   CNT A  94     -60.279  54.484  58.920  0.00  0.00           C  
ATOM   2914  C   CNT A  94     -59.945  53.419  58.030  6.00  0.00           C  
ATOM   2915  C   CNT A  94     -60.892  52.878  60.630  5.00  0.00           C  
ATOM   2916  C   CNT A  94     -61.052  51.961  59.600  7.00  0.00           C  
ATOM   2917  C   CNT A  94     -60.448  52.186  58.330  5.00  0.00           C  
ATOM   2918  C   CNT A  94     -60.841  51.342  57.310  3.00  0.00           C  
ATOM   2919  C   CNT A  94     -61.921  50.827  59.780  6.00  0.00           C  
ATOM   2920  C   CNT A  94     -62.542  50.296  58.630  3.00  0.00           C  
ATOM   2921  C   CNT A  94     -61.980  50.548  57.390  1.00  0.00           C  
ATOM   2922  C   CNT A  94     -62.800  50.418  56.230  8.00  0.00           C  
ATOM   2923  C   CNT A  94     -63.833  49.792  58.750  1.00  0.00           C  
ATOM   2924  C   CNT A  94     -64.717  49.724  57.630  1.00  0.00           C  
ATOM   2925  C   CNT A  94     -64.173  50.113  56.380  0.00  0.00           C  
ATOM   2926  C   CNT A  94     -65.038  50.658  55.340  5.00  0.00           C  
ATOM   2927  C   CNT A  94     -66.087  50.035  57.830  2.00  0.00           C  
ATOM   2928  C   CNT A  94     -66.775  50.939  56.990  1.00  0.00           C  
ATOM   2929  C   CNT A  94     -66.207  51.244  55.740  2.00  0.00           C  
ATOM   2930  C   CNT A  94     -66.635  52.387  55.060  0.00  0.00           C  
ATOM   2931  C   CNT A  94     -67.694  51.842  57.600  9.00  0.00           C  
ATOM   2932  C   CNT A  94     -67.834  53.120  57.030  8.00  0.00           C  
ATOM   2933  C   CNT A  94     -67.345  53.360  55.750  6.00  0.00           C  
ATOM   2934  C   CNT A  94     -67.212  54.719  55.440  3.00  0.00           C  
ATOM   2935  C   CNT A  94     -66.764  54.993  54.120  5.00  0.00           C  
ATOM   2936  C   CNT A  94     -66.173  56.319  53.840  7.00  0.00           C  
ATOM   2937  C   CNT A  94     -65.551  56.506  52.610  4.00  0.00           C  
ATOM   2938  C   CNT A  94     -64.669  57.620  52.420  6.00  0.00           C  
ATOM   2939  C   CNT A  94     -65.638  56.991  54.990  2.00  0.00           C  
ATOM   2940  C   CNT A  94     -64.558  57.903  54.830  4.00  0.00           C  
ATOM   2941  C   CNT A  94     -64.043  58.165  53.560  4.00  0.00           C  
ATOM   2942  C   CNT A  94     -62.686  58.639  53.450  0.00  0.00           C  
ATOM   2943  C   CNT A  94     -63.780  58.250  56.000  7.00  0.00           C  
ATOM   2944  C   CNT A  94     -62.389  58.359  55.870  8.00  0.00           C  
ATOM   2945  C   CNT A  94     -61.836  58.567  54.570  5.00  0.00           C  
ATOM   2946  C   CNT A  94     -60.443  58.446  54.370  3.00  0.00           C  
ATOM   2947  C   CNT A  94     -61.555  57.741  56.850  5.00  0.00           C  
ATOM   2948  C   CNT A  94     -60.317  57.142  56.430  7.00  0.00           C  
ATOM   2949  C   CNT A  94     -59.746  57.499  55.190  4.00  0.00           C  
ATOM   2950  C   CNT A  94     -58.796  56.671  54.630  5.00  0.00           C  
ATOM   2951  C   CNT A  94     -59.783  56.049  57.240  3.00  0.00           C  
ATOM   2952  C   CNT A  94     -59.095  55.076  56.550  9.00  0.00           C  
ATOM   2953  C   CNT A  94     -58.659  55.372  55.220  7.00  0.00           C  
ATOM   2954  C   CNT A  94     -58.263  54.286  54.330  0.00  0.00           C  
ATOM   2955  C   CNT A  94     -59.391  53.760  56.820  6.00  0.00           C  
ATOM   2956  C   CNT A  94     -59.380  52.719  55.870  9.00  0.00           C  
ATOM   2957  C   CNT A  94     -58.867  52.984  54.560  9.00  0.00           C  
ATOM   2958  C   CNT A  94     -59.343  52.194  53.410  9.00  0.00           C  
ATOM   2959  C   CNT A  94     -60.343  51.677  56.010  1.00  0.00           C  
ATOM   2960  C   CNT A  94     -60.930  51.064  54.850  6.00  0.00           C  
ATOM   2961  C   CNT A  94     -60.456  51.380  53.540  1.00  0.00           C  
ATOM   2962  C   CNT A  94     -61.272  51.122  52.420  2.00  0.00           C  
ATOM   2963  C   CNT A  94     -62.281  50.680  54.970  6.00  0.00           C  
ATOM   2964  C   CNT A  94     -63.143  50.730  53.860  0.00  0.00           C  
ATOM   2965  C   CNT A  94     -62.642  50.974  52.600  1.00  0.00           C  
ATOM   2966  C   CNT A  94     -63.513  51.417  51.530  8.00  0.00           C  
ATOM   2967  C   CNT A  94     -64.476  51.001  54.160  8.00  0.00           C  
ATOM   2968  C   CNT A  94     -65.200  51.770  53.220  5.00  0.00           C  
ATOM   2969  C   CNT A  94     -64.662  52.092  51.950  7.00  0.00           C  
ATOM   2970  C   CNT A  94     -65.143  53.196  51.270  4.00  0.00           C  
ATOM   2971  C   CNT A  94     -66.212  52.627  53.750  6.00  0.00           C  
ATOM   2972  C   CNT A  94     -66.323  53.972  53.230  2.00  0.00           C  
ATOM   2973  C   CNT A  94     -65.800  54.217  51.950  4.00  0.00           C  
ATOM   2974  C   CNT A  94     -65.554  55.578  51.620  3.00  0.00           C  
ATOM   2975  C   CNT A  94     -65.078  55.911  50.350  7.00  0.00           C  
ATOM   2976  C   CNT A  94     -64.439  57.121  50.140  7.00  0.00           C  
ATOM   2977  C   CNT A  94     -63.993  57.421  48.870  2.00  0.00           C  
ATOM   2978  C   CNT A  94     -63.067  58.459  48.710  1.00  0.00           C  
ATOM   2979  C   CNT A  94     -64.107  57.904  51.220  4.00  0.00           C  
ATOM   2980  C   CNT A  94     -63.007  58.805  51.100  0.00  0.00           C  
ATOM   2981  C   CNT A  94     -62.464  59.057  49.840  2.00  0.00           C  
ATOM   2982  C   CNT A  94     -61.189  59.614  49.680  8.00  0.00           C  
ATOM   2983  C   CNT A  94     -62.195  58.942  52.190  2.00  0.00           C  
ATOM   2984  C   CNT A  94     -60.800  59.058  52.010  2.00  0.00           C  
ATOM   2985  C   CNT A  94     -60.295  59.469  50.770  0.00  0.00           C  
ATOM   2986  C   CNT A  94     -58.932  59.246  50.540  6.00  0.00           C  
ATOM   2987  C   CNT A  94     -59.895  58.699  53.040  5.00  0.00           C  
ATOM   2988  C   CNT A  94     -58.696  58.079  52.620  8.00  0.00           C  
ATOM   2989  C   CNT A  94     -58.203  58.317  51.360  4.00  0.00           C  
ATOM   2990  C   CNT A  94     -57.224  57.524  50.790  1.00  0.00           C  
ATOM   2991  C   CNT A  94     -58.294  56.949  53.380  6.00  0.00           C  
ATOM   2992  C   CNT A  94     -57.618  55.938  52.680  6.00  0.00           C  
ATOM   2993  C   CNT A  94     -57.042  56.215  51.410  1.00  0.00           C  
ATOM   2994  C   CNT A  94     -56.716  55.122  50.480  8.00  0.00           C  
ATOM   2995  C   CNT A  94     -57.728  54.596  53.060  2.00  0.00           C  
ATOM   2996  C   CNT A  94     -57.993  53.701  52.030  1.00  0.00           C  
ATOM   2997  C   CNT A  94     -57.398  53.900  50.750  9.00  0.00           C  
ATOM   2998  C   CNT A  94     -57.701  53.086  49.650  2.00  0.00           C  
ATOM   2999  C   CNT A  94     -58.833  52.530  52.180  1.00  0.00           C  
ATOM   3000  C   CNT A  94     -59.426  51.990  51.030  6.00  0.00           C  
ATOM   3001  C   CNT A  94     -58.856  52.258  49.780  0.00  0.00           C  
ATOM   3002  C   CNT A  94     -59.705  52.203  48.650  5.00  0.00           C  
ATOM   3003  C   CNT A  94     -60.691  51.290  51.140  9.00  0.00           C  
ATOM   3004  C   CNT A  94     -61.612  51.533  50.030  4.00  0.00           C  
ATOM   3005  C   CNT A  94     -61.104  51.843  48.780  1.00  0.00           C  
ATOM   3006  C   CNT A  94     -61.964  52.290  47.770  3.00  0.00           C  
ATOM   3007  C   CNT A  94     -62.937  51.808  50.270  0.00  0.00           C  
ATOM   3008  C   CNT A  94     -63.665  52.754  49.390  3.00  0.00           C  
ATOM   3009  C   CNT A  94     -63.120  52.985  48.080  9.00  0.00           C  
ATOM   3010  C   CNT A  94     -63.599  54.091  47.440  4.00  0.00           C  
ATOM   3011  C   CNT A  94     -64.522  53.616  50.060  9.00  0.00           C  
ATOM   3012  C   CNT A  94     -64.694  54.847  49.480  7.00  0.00           C  
ATOM   3013  C   CNT A  94     -64.247  55.137  48.210  4.00  0.00           C  
ATOM   3014  C   CNT A  94     -64.048  56.458  47.840  7.00  0.00           C  
ATOM   3015  C   CNT A  94     -63.612  56.691  46.500  5.00  0.00           C  
ATOM   3016  C   CNT A  94     -62.943  57.902  46.310  2.00  0.00           C  
ATOM   3017  C   CNT A  94     -62.305  58.230  45.110  3.00  0.00           C  
ATOM   3018  C   CNT A  94     -61.490  59.367  44.890  5.00  0.00           C  
ATOM   3019  C   CNT A  94     -62.593  58.731  47.400  2.00  0.00           C  
ATOM   3020  C   CNT A  94     -61.410  59.516  47.290  7.00  0.00           C  
ATOM   3021  C   CNT A  94     -60.949  59.978  46.060  5.00  0.00           C  
ATOM   3022  C   CNT A  94     -59.716  60.567  45.920  5.00  0.00           C  
ATOM   3023  C   CNT A  94     -60.645  59.877  48.440  9.00  0.00           C  
ATOM   3024  C   CNT A  94     -59.250  60.058  48.280  3.00  0.00           C  
ATOM   3025  C   CNT A  94     -58.789  60.379  46.980  8.00  0.00           C  
ATOM   3026  C   CNT A  94     -57.470  60.005  46.720  0.00  0.00           C  
ATOM   3027  C   CNT A  94     -58.374  59.494  49.290  0.00  0.00           C  
ATOM   3028  C   CNT A  94     -57.290  58.849  48.830  3.00  0.00           C  
ATOM   3029  C   CNT A  94     -56.768  59.096  47.560  3.00  0.00           C  
ATOM   3030  C   CNT A  94     -55.742  58.313  47.040  4.00  0.00           C  
ATOM   3031  C   CNT A  94     -56.747  57.737  49.510  4.00  0.00           C  
ATOM   3032  C   CNT A  94     -55.959  56.736  48.810  6.00  0.00           C  
ATOM   3033  C   CNT A  94     -55.539  57.033  47.520  3.00  0.00           C  
ATOM   3034  C   CNT A  94     -55.272  55.956  46.670  1.00  0.00           C  
ATOM   3035  C   CNT A  94     -56.181  55.403  49.220  5.00  0.00           C  
ATOM   3036  C   CNT A  94     -56.249  54.392  48.220  1.00  0.00           C  
ATOM   3037  C   CNT A  94     -55.760  54.668  46.940  3.00  0.00           C  
ATOM   3038  C   CNT A  94     -56.208  53.903  45.860  1.00  0.00           C  
ATOM   3039  C   CNT A  94     -57.163  53.344  48.360  0.00  0.00           C  
ATOM   3040  C   CNT A  94     -57.866  52.899  47.230  9.00  0.00           C  
ATOM   3041  C   CNT A  94     -57.328  53.048  45.980  2.00  0.00           C  
ATOM   3042  C   CNT A  94     -58.121  52.830  44.800  9.00  0.00           C  
ATOM   3043  C   CNT A  94     -59.158  52.397  47.380  1.00  0.00           C  
ATOM   3044  C   CNT A  94     -60.061  52.518  46.280  4.00  0.00           C  
ATOM   3045  C   CNT A  94     -59.556  52.798  45.010  5.00  0.00           C  
ATOM   3046  C   CNT A  94     -60.340  53.396  44.040  5.00  0.00           C  
ATOM   3047  C   CNT A  94     -61.461  52.685  46.510  7.00  0.00           C  
ATOM   3048  C   CNT A  94     -62.148  53.511  45.600  9.00  0.00           C  
ATOM   3049  C   CNT A  94     -61.596  53.843  44.360  0.00  0.00           C  
ATOM   3050  C   CNT A  94     -62.117  54.933  43.640  8.00  0.00           C  
ATOM   3051  C   CNT A  94     -63.111  54.404  46.170  9.00  0.00           C  
ATOM   3052  C   CNT A  94     -63.318  55.671  45.590  7.00  0.00           C  
ATOM   3053  C   CNT A  94     -62.791  55.953  44.340  0.00  0.00           C  
ATOM   3054  C   CNT A  94     -62.337  57.290  44.080  5.00  0.00           C  
ATOM   3055  C   CNT A  94     -61.834  57.610  42.790  9.00  0.00           C  
ATOM   3056  C   CNT A  94     -61.373  58.860  42.560  3.00  0.00           C  
ATOM   3057  C   CNT A  94     -60.902  59.199  41.290  3.00  0.00           C  
ATOM   3058  C   CNT A  94     -60.037  60.322  41.110  4.00  0.00           C  
ATOM   3059  C   CNT A  94     -61.074  59.736  43.630  6.00  0.00           C  
ATOM   3060  C   CNT A  94     -60.037  60.699  43.490  9.00  0.00           C  
ATOM   3061  C   CNT A  94     -59.509  60.910  42.260  4.00  0.00           C  
ATOM   3062  C   CNT A  94     -58.152  61.332  42.110  5.00  0.00           C  
ATOM   3063  C   CNT A  94     -59.175  60.839  44.640  8.00  0.00           C  
ATOM   3064  C   CNT A  94     -57.770  60.890  44.470  0.00  0.00           C  
ATOM   3065  C   CNT A  94     -57.276  61.182  43.240  4.00  0.00           C  
ATOM   3066  C   CNT A  94     -55.945  60.893  42.950  1.00  0.00           C  
ATOM   3067  C   CNT A  94     -56.929  60.387  45.470  3.00  0.00           C  
ATOM   3068  C   CNT A  94     -55.698  59.741  45.130  1.00  0.00           C  
ATOM   3069  C   CNT A  94     -55.228  59.986  43.790  4.00  0.00           C  
ATOM   3070  C   CNT A  94     -54.330  59.113  43.200  1.00  0.00           C  
ATOM   3071  C   CNT A  94     -55.216  58.603  45.800  6.00  0.00           C  
ATOM   3072  C   CNT A  94     -54.626  57.577  45.030  1.00  0.00           C  
ATOM   3073  C   CNT A  94     -54.184  57.856  43.730  9.00  0.00           C  
ATOM   3074  C   CNT A  94     -53.792  56.783  42.900  0.00  0.00           C  
ATOM   3075  C   CNT A  94     -54.781  56.218  45.410  2.00  0.00           C  
ATOM   3076  C   CNT A  94     -54.791  55.252  44.450  5.00  0.00           C  
ATOM   3077  C   CNT A  94     -54.231  55.428  43.140  5.00  0.00           C  
ATOM   3078  C   CNT A  94     -54.553  54.629  42.060  3.00  0.00           C  
ATOM   3079  C   CNT A  94     -55.690  54.189  44.600  9.00  0.00           C  
ATOM   3080  C   CNT A  94     -56.255  53.574  43.450  5.00  0.00           C  
ATOM   3081  C   CNT A  94     -55.674  53.788  42.110  8.00  0.00           C  
ATOM   3082  C   CNT A  94     -56.558  53.746  40.980  5.00  0.00           C  
ATOM   3083  C   CNT A  94     -57.576  53.126  43.520  7.00  0.00           C  
ATOM   3084  C   CNT A  94     -58.434  53.426  42.440  9.00  0.00           C  
ATOM   3085  C   CNT A  94     -57.963  53.710  41.180  1.00  0.00           C  
ATOM   3086  C   CNT A  94     -58.764  54.268  40.180  2.00  0.00           C  
ATOM   3087  C   CNT A  94     -59.773  53.612  42.750  9.00  0.00           C  
ATOM   3088  C   CNT A  94     -60.575  54.394  41.840  6.00  0.00           C  
ATOM   3089  C   CNT A  94     -60.031  54.701  40.580  9.00  0.00           C  
ATOM   3090  C   CNT A  94     -60.537  55.845  39.890  2.00  0.00           C  
ATOM   3091  C   CNT A  94     -61.545  55.231  42.390  0.00  0.00           C  
ATOM   3092  C   CNT A  94     -61.585  56.552  41.870  6.00  0.00           C  
ATOM   3093  C   CNT A  94     -61.040  56.898  40.630  9.00  0.00           C  
ATOM   3094  C   CNT A  94     -60.933  58.225  40.290  8.00  0.00           C  
ATOM   3095  C   CNT A  94     -60.484  58.528  38.980  1.00  0.00           C  
ATOM   3096  C   CNT A  94     -59.802  59.747  38.780  7.00  0.00           C  
ATOM   3097  C   CNT A  94     -59.366  60.112  37.510  6.00  0.00           C  
ATOM   3098  C   CNT A  94     -58.501  61.206  37.330  5.00  0.00           C  
ATOM   3099  C   CNT A  94     -59.557  60.594  39.810  6.00  0.00           C  
ATOM   3100  C   CNT A  94     -58.473  61.500  39.720  8.00  0.00           C  
ATOM   3101  C   CNT A  94     -57.929  61.752  38.480  1.00  0.00           C  
ATOM   3102  C   CNT A  94     -56.626  62.331  38.380  9.00  0.00           C  
ATOM   3103  C   CNT A  94     -57.664  61.686  40.910  4.00  0.00           C  
ATOM   3104  C   CNT A  94     -56.277  61.826  40.720  9.00  0.00           C  
ATOM   3105  C   CNT A  94     -55.721  62.155  39.450  9.00  0.00           C  
ATOM   3106  C   CNT A  94     -54.430  61.823  39.090  9.00  0.00           C  
ATOM   3107  C   CNT A  94     -55.419  61.295  41.700  3.00  0.00           C  
ATOM   3108  C   CNT A  94     -54.283  60.630  41.230  6.00  0.00           C  
ATOM   3109  C   CNT A  94     -53.792  60.898  39.950  3.00  0.00           C  
ATOM   3110  C   CNT A  94     -52.825  60.056  39.360  3.00  0.00           C  
ATOM   3111  C   CNT A  94     -53.846  59.474  41.910  1.00  0.00           C  
ATOM   3112  C   CNT A  94     -53.084  58.487  41.240  3.00  0.00           C  
ATOM   3113  C   CNT A  94     -52.712  58.763  39.920  2.00  0.00           C  
ATOM   3114  C   CNT A  94     -52.230  57.774  39.020  5.00  0.00           C  
ATOM   3115  C   CNT A  94     -53.185  57.119  41.640  5.00  0.00           C  
ATOM   3116  C   CNT A  94     -53.218  56.162  40.600  4.00  0.00           C  
ATOM   3117  C   CNT A  94     -52.758  56.453  39.320  0.00  0.00           C  
ATOM   3118  C   CNT A  94     -53.084  55.685  38.170  7.00  0.00           C  
ATOM   3119  C   CNT A  94     -54.120  55.036  40.760  0.00  0.00           C  
ATOM   3120  C   CNT A  94     -54.813  54.632  39.620  6.00  0.00           C  
ATOM   3121  C   CNT A  94     -54.272  54.838  38.310  4.00  0.00           C  
ATOM   3122  C   CNT A  94     -55.074  54.723  37.160  7.00  0.00           C  
ATOM   3123  C   CNT A  94     -56.081  54.029  39.700  2.00  0.00           C  
ATOM   3124  C   CNT A  94     -56.971  54.234  38.620  9.00  0.00           C  
ATOM   3125  C   CNT A  94     -56.489  54.641  37.310  1.00  0.00           C  
ATOM   3126  C   CNT A  94     -57.331  55.055  36.290  9.00  0.00           C  
ATOM   3127  C   CNT A  94     -58.311  54.543  38.930  8.00  0.00           C  
ATOM   3128  C   CNT A  94     -59.030  55.356  38.020  2.00  0.00           C  
ATOM   3129  C   CNT A  94     -58.563  55.650  36.720  4.00  0.00           C  
ATOM   3130  C   CNT A  94     -58.984  56.804  36.010  6.00  0.00           C  
ATOM   3131  C   CNT A  94     -59.954  56.187  38.620  6.00  0.00           C  
ATOM   3132  C   CNT A  94     -60.152  57.486  38.090  6.00  0.00           C  
ATOM   3133  C   CNT A  94     -59.682  57.773  36.770  2.00  0.00           C  
ATOM   3134  C   CNT A  94     -59.482  59.159  36.460  4.00  0.00           C  
ATOM   3135  C   CNT A  94     -58.988  59.501  35.240  3.00  0.00           C  
ATOM   3136  C   CNT A  94     -58.405  60.740  34.920  5.00  0.00           C  
ATOM   3137  C   CNT A  94     -57.910  61.117  33.680  0.00  0.00           C  
ATOM   3138  C   CNT A  94     -57.045  62.220  33.550  3.00  0.00           C  
ATOM   3139  C   CNT A  94     -57.965  61.522  36.070  6.00  0.00           C  
ATOM   3140  C   CNT A  94     -56.941  62.401  35.970  0.00  0.00           C  
ATOM   3141  C   CNT A  94     -56.453  62.737  34.680  3.00  0.00           C  
ATOM   3142  C   CNT A  94     -55.169  63.238  34.560  2.00  0.00           C  
ATOM   3143  C   CNT A  94     -56.147  62.678  37.130  1.00  0.00           C  
ATOM   3144  C   CNT A  94     -54.735  62.701  36.890  6.00  0.00           C  
ATOM   3145  C   CNT A  94     -54.235  63.150  35.650  9.00  0.00           C  
ATOM   3146  C   CNT A  94     -52.921  62.728  35.310  5.00  0.00           C  
ATOM   3147  C   CNT A  94     -53.861  62.150  37.880  1.00  0.00           C  
ATOM   3148  C   CNT A  94     -52.714  61.548  37.410  8.00  0.00           C  
ATOM   3149  C   CNT A  94     -52.234  61.866  36.140  7.00  0.00           C  
ATOM   3150  C   CNT A  94     -51.154  61.118  35.680  8.00  0.00           C  
ATOM   3151  C   CNT A  94     -52.231  60.462  38.140  7.00  0.00           C  
ATOM   3152  C   CNT A  94     -51.499  59.490  37.430  2.00  0.00           C  
ATOM   3153  C   CNT A  94     -50.934  59.824  36.200  5.00  0.00           C  
ATOM   3154  C   CNT A  94     -50.731  58.815  35.280  3.00  0.00           C  
ATOM   3155  C   CNT A  94     -51.781  58.125  37.710  8.00  0.00           C  
ATOM   3156  C   CNT A  94     -51.835  57.153  36.750  3.00  0.00           C  
ATOM   3157  C   CNT A  94     -51.388  57.540  35.480  7.00  0.00           C  
ATOM   3158  C   CNT A  94     -51.652  56.642  34.390  2.00  0.00           C  
ATOM   3159  C   CNT A  94     -52.726  56.102  36.900  2.00  0.00           C  
ATOM   3160  C   CNT A  94     -53.314  55.541  35.710  1.00  0.00           C  
ATOM   3161  C   CNT A  94     -52.791  55.836  34.430  5.00  0.00           C  
ATOM   3162  C   CNT A  94     -53.548  55.711  33.310  1.00  0.00           C  
ATOM   3163  C   CNT A  94     -54.578  55.035  35.880  7.00  0.00           C  
ATOM   3164  C   CNT A  94     -55.435  55.154  34.710  3.00  0.00           C  
ATOM   3165  C   CNT A  94     -54.930  55.448  33.450  2.00  0.00           C  
ATOM   3166  C   CNT A  94     -55.789  56.070  32.480  9.00  0.00           C  
ATOM   3167  C   CNT A  94     -56.796  55.387  34.990  4.00  0.00           C  
ATOM   3168  C   CNT A  94     -57.468  56.355  34.190  8.00  0.00           C  
ATOM   3169  C   CNT A  94     -56.973  56.690  32.900  9.00  0.00           C  
ATOM   3170  C   CNT A  94     -57.567  57.824  32.240  9.00  0.00           C  
ATOM   3171  C   CNT A  94     -58.408  57.198  34.800  2.00  0.00           C  
ATOM   3172  C   CNT A  94     -58.620  58.503  34.300  8.00  0.00           C  
ATOM   3173  C   CNT A  94     -58.096  58.851  33.050  2.00  0.00           C  
ATOM   3174  C   CNT A  94     -57.965  60.151  32.630  0.00  0.00           C  
ATOM   3175  C   CNT A  94     -57.385  60.489  31.400  3.00  0.00           C  
ATOM   3176  C   CNT A  94     -56.774  61.699  31.160  4.00  0.00           C  
ATOM   3177  C   CNT A  94     -56.242  61.974  29.910  0.00  0.00           C  
ATOM   3178  C   CNT A  94     -55.440  63.090  29.730  3.00  0.00           C  
ATOM   3179  C   CNT A  94     -56.463  62.454  32.280  7.00  0.00           C  
ATOM   3180  C   CNT A  94     -55.395  63.347  32.150  6.00  0.00           C  
ATOM   3181  C   CNT A  94     -54.925  63.694  30.880  5.00  0.00           C  
ATOM   3182  C   CNT A  94     -53.579  64.220  30.800  8.00  0.00           C  
ATOM   3183  C   CNT A  94     -54.615  63.559  33.290  6.00  0.00           C  
ATOM   3184  C   CNT A  94     -53.205  63.637  33.130  8.00  0.00           C  
ATOM   3185  C   CNT A  94     -52.704  64.001  31.890  0.00  0.00           C  
ATOM   3186  C   CNT A  94     -51.326  63.792  31.650  6.00  0.00           C  
ATOM   3187  C   CNT A  94     -52.392  63.075  34.080  6.00  0.00           C  
ATOM   3188  C   CNT A  94     -51.094  62.589  33.740  1.00  0.00           C  
ATOM   3189  C   CNT A  94     -50.627  62.904  32.440  0.00  0.00           C  
ATOM   3190  C   CNT A  94     -49.651  62.056  31.890  8.00  0.00           C  
ATOM   3191  C   CNT A  94     -50.689  61.423  34.390  0.00  0.00           C  
ATOM   3192  C   CNT A  94     -50.021  60.421  33.650  1.00  0.00           C  
ATOM   3193  C   CNT A  94     -49.545  60.762  32.410  9.00  0.00           C  
ATOM   3194  C   CNT A  94     -49.207  59.699  31.520  5.00  0.00           C  
ATOM   3195  C   CNT A  94     -50.194  59.054  34.020  3.00  0.00           C  
ATOM   3196  C   CNT A  94     -50.144  58.018  33.000  6.00  0.00           C  
ATOM   3197  C   CNT A  94     -49.645  58.368  31.760  2.00  0.00           C  
ATOM   3198  C   CNT A  94     -50.005  57.605  30.630  4.00  0.00           C  
ATOM   3199  C   CNT A  94     -51.060  56.961  33.100  9.00  0.00           C  
ATOM   3200  C   CNT A  94     -51.694  56.461  31.990  2.00  0.00           C  
ATOM   3201  C   CNT A  94     -51.176  56.790  30.690  6.00  0.00           C  
ATOM   3202  C   CNT A  94     -52.012  56.570  29.580  4.00  0.00           C  
ATOM   3203  C   CNT A  94     -52.988  56.057  32.040  6.00  0.00           C  
ATOM   3204  C   CNT A  94     -53.889  56.151  30.970  0.00  0.00           C  
ATOM   3205  C   CNT A  94     -53.400  56.469  29.700  3.00  0.00           C  
ATOM   3206  C   CNT A  94     -54.207  57.050  28.720  1.00  0.00           C  
ATOM   3207  C   CNT A  94     -55.240  56.405  31.240  4.00  0.00           C  
ATOM   3208  C   CNT A  94     -55.985  57.259  30.390  8.00  0.00           C  
ATOM   3209  C   CNT A  94     -55.433  57.601  29.150  1.00  0.00           C  
ATOM   3210  C   CNT A  94     -55.950  58.752  28.440  6.00  0.00           C  
ATOM   3211  C   CNT A  94     -56.925  58.155  31.020  6.00  0.00           C  
ATOM   3212  C   CNT A  94     -57.071  59.429  30.430  8.00  0.00           C  
ATOM   3213  C   CNT A  94     -56.585  59.733  29.200  0.00  0.00           C  
ATOM   3214  C   CNT A  94     -56.373  61.117  28.850  0.00  0.00           C  
ATOM   3215  C   CNT A  94     -55.941  61.446  27.580  3.00  0.00           C  
ATOM   3216  C   CNT A  94     -55.334  62.728  27.320  9.00  0.00           C  
ATOM   3217  C   CNT A  94     -54.702  63.008  26.120  8.00  0.00           C  
ATOM   3218  C   CNT A  94     -53.866  64.160  26.030  8.00  0.00           C  
ATOM   3219  C   CNT A  94     -54.937  63.476  28.480  6.00  0.00           C  
ATOM   3220  C   CNT A  94     -53.848  64.358  28.410  8.00  0.00           C  
ATOM   3221  C   CNT A  94     -53.291  64.678  27.160  6.00  0.00           C  
ATOM   3222  C   CNT A  94     -51.960  65.105  27.080  5.00  0.00           C  
ATOM   3223  C   CNT A  94     -53.080  64.655  29.550  5.00  0.00           C  
ATOM   3224  C   CNT A  94     -51.676  64.728  29.440  4.00  0.00           C  
ATOM   3225  C   CNT A  94     -51.098  64.956  28.190  9.00  0.00           C  
ATOM   3226  C   CNT A  94     -49.765  64.718  27.890  5.00  0.00           C  
ATOM   3227  C   CNT A  94     -50.896  64.095  30.390  7.00  0.00           C  
ATOM   3228  C   CNT A  94     -49.729  63.429  29.950  9.00  0.00           C  
ATOM   3229  C   CNT A  94     -49.113  63.866  28.760  8.00  0.00           C  
ATOM   3230  C   CNT A  94     -48.075  63.056  28.270  2.00  0.00           C  
ATOM   3231  C   CNT A  94     -49.102  62.369  30.630  1.00  0.00           C  
ATOM   3232  C   CNT A  94     -48.421  61.377  29.930  6.00  0.00           C  
ATOM   3233  C   CNT A  94     -47.885  61.727  28.660  8.00  0.00           C  
ATOM   3234  C   CNT A  94     -47.684  60.712  27.740  4.00  0.00           C  
ATOM   3235  C   CNT A  94     -48.629  60.046  30.260  8.00  0.00           C  
ATOM   3236  C   CNT A  94     -48.730  59.119  29.240  0.00  0.00           C  
ATOM   3237  C   CNT A  94     -48.181  59.414  28.010  1.00  0.00           C  
ATOM   3238  C   CNT A  94     -48.542  58.638  26.880  6.00  0.00           C  
ATOM   3239  C   CNT A  94     -49.646  58.020  29.390  1.00  0.00           C  
ATOM   3240  C   CNT A  94     -50.236  57.412  28.290  7.00  0.00           C  
ATOM   3241  C   CNT A  94     -49.651  57.785  27.000  2.00  0.00           C  
ATOM   3242  C   CNT A  94     -50.409  57.556  25.800  7.00  0.00           C  
ATOM   3243  C   CNT A  94     -51.500  56.851  28.310  5.00  0.00           C  
ATOM   3244  C   CNT A  94     -52.330  57.118  27.200  5.00  0.00           C  
ATOM   3245  C   CNT A  94     -51.849  57.455  25.970  4.00  0.00           C  
ATOM   3246  C   CNT A  94     -52.656  58.060  25.030  1.00  0.00           C  
ATOM   3247  C   CNT A  94     -53.718  57.424  27.470  2.00  0.00           C  
ATOM   3248  C   CNT A  94     -54.380  58.370  26.640  9.00  0.00           C  
ATOM   3249  C   CNT A  94     -53.897  58.662  25.420  2.00  0.00           C  
ATOM   3250  C   CNT A  94     -54.420  59.761  24.690  3.00  0.00           C  
ATOM   3251  C   CNT A  94     -55.373  59.141  27.210  9.00  0.00           C  
ATOM   3252  C   CNT A  94     -55.582  60.428  26.670  4.00  0.00           C  
ATOM   3253  C   CNT A  94     -55.089  60.770  25.380  2.00  0.00           C  
ATOM   3254  C   CNT A  94     -54.767  62.088  25.090  7.00  0.00           C  
ATOM   3255  C   CNT A  94     -54.301  62.439  23.800  4.00  0.00           C  
ATOM   3256  C   CNT A  94     -53.721  63.717  23.650  1.00  0.00           C  
ATOM   3257  C   CNT A  94     -53.196  63.974  22.330  5.00  0.00           C  
ATOM   3258  C   CNT A  94     -52.298  65.015  22.270  3.00  0.00           C  
ATOM   3259  C   CNT A  94     -53.417  64.494  24.760  5.00  0.00           C  
ATOM   3260  C   CNT A  94     -52.335  65.407  24.680  1.00  0.00           C  
ATOM   3261  C   CNT A  94     -51.737  65.541  23.440  0.00  0.00           C  
ATOM   3262  C   CNT A  94     -50.423  65.952  23.290  3.00  0.00           C  
ATOM   3263  C   CNT A  94     -51.439  65.426  25.770  7.00  0.00           C  
ATOM   3264  C   CNT A  94     -50.039  65.633  25.660  9.00  0.00           C  
ATOM   3265  C   CNT A  94     -49.518  65.868  24.370  8.00  0.00           C  
ATOM   3266  C   CNT A  94     -48.138  65.628  24.120  8.00  0.00           C  
ATOM   3267  C   CNT A  94     -49.143  65.057  26.640  9.00  0.00           C  
ATOM   3268  C   CNT A  94     -47.992  64.394  26.210  5.00  0.00           C  
ATOM   3269  C   CNT A  94     -47.508  64.671  24.920  5.00  0.00           C  
ATOM   3270  C   CNT A  94     -46.481  63.943  24.390  5.00  0.00           C  
ATOM   3271  C   CNT A  94     -47.582  63.299  26.930  8.00  0.00           C  
ATOM   3272  C   CNT A  94     -46.870  62.356  26.210  4.00  0.00           C  
ATOM   3273  C   CNT A  94     -46.322  62.629  24.890  2.00  0.00           C  
ATOM   3274  C   CNT A  94     -46.200  61.639  24.010  7.00  0.00           C  
ATOM   3275  C   CNT A  94     -47.143  60.990  26.500  8.00  0.00           C  
ATOM   3276  C   CNT A  94     -47.221  60.039  25.490  7.00  0.00           C  
ATOM   3277  C   CNT A  94     -46.761  60.355  24.200  2.00  0.00           C  
ATOM   3278  C   CNT A  94     -46.998  59.493  23.060  4.00  0.00           C  
ATOM   3279  C   CNT A  94     -48.023  58.913  25.630  1.00  0.00           C  
ATOM   3280  C   CNT A  94     -48.582  58.309  24.430  9.00  0.00           C  
ATOM   3281  C   CNT A  94     -48.056  58.590  23.190  4.00  0.00           C  
ATOM   3282  C   CNT A  94     -48.863  58.486  22.020  1.00  0.00           C  
ATOM   3283  C   CNT A  94     -49.909  57.878  24.520  2.00  0.00           C  
ATOM   3284  C   CNT A  94     -50.761  58.084  23.480  5.00  0.00           C  
ATOM   3285  C   CNT A  94     -50.200  58.392  22.170  8.00  0.00           C  
ATOM   3286  C   CNT A  94     -51.083  58.879  21.170  3.00  0.00           C  
ATOM   3287  C   CNT A  94     -52.102  58.376  23.780  3.00  0.00           C  
ATOM   3288  C   CNT A  94     -52.792  59.239  22.860  7.00  0.00           C  
ATOM   3289  C   CNT A  94     -52.284  59.485  21.560  4.00  0.00           C  
ATOM   3290  C   CNT A  94     -52.750  60.621  20.890  6.00  0.00           C  
ATOM   3291  C   CNT A  94     -53.890  60.071  23.380  8.00  0.00           C  
ATOM   3292  C   CNT A  94     -53.946  61.353  22.910  9.00  0.00           C  
ATOM   3293  C   CNT A  94     -53.311  61.676  21.690  5.00  0.00           C  
ATOM   3294  C   CNT A  94     -53.070  62.999  21.350  5.00  0.00           C  
ATOM   3295  C   CNT A  94     -52.549  63.331  20.110  1.00  0.00           C  
ATOM   3296  C   CNT A  94     -52.072  64.582  19.860  8.00  0.00           C  
ATOM   3297  C   CNT A  94     -51.655  64.938  18.560  2.00  0.00           C  
ATOM   3298  C   CNT A  94     -50.807  65.991  18.450  4.00  0.00           C  
ATOM   3299  C   CNT A  94     -51.837  65.402  20.970  7.00  0.00           C  
ATOM   3300  C   CNT A  94     -50.687  66.198  20.880  6.00  0.00           C  
ATOM   3301  C   CNT A  94     -50.163  66.496  19.610  8.00  0.00           C  
ATOM   3302  C   CNT A  94     -48.846  66.967  19.590  4.00  0.00           C  
ATOM   3303  C   CNT A  94     -49.937  66.384  22.060  4.00  0.00           C  
ATOM   3304  C   CNT A  94     -48.537  66.496  21.920  8.00  0.00           C  
ATOM   3305  C   CNT A  94     -47.998  66.726  20.640  8.00  0.00           C  
ATOM   3306  C   CNT A  94     -46.603  66.659  20.310  6.00  0.00           C  
ATOM   3307  C   CNT A  94     -47.657  66.004  22.870  7.00  0.00           C  
ATOM   3308  C   CNT A  94     -46.475  65.410  22.410  7.00  0.00           C  
ATOM   3309  C   CNT A  94     -45.924  65.740  21.180  0.00  0.00           C  
ATOM   3310  C   CNT A  94     -44.940  64.898  20.570  9.00  0.00           C  
ATOM   3311  C   CNT A  94     -46.071  64.267  23.070  5.00  0.00           C  
ATOM   3312  C   CNT A  94     -45.417  63.273  22.370  0.00  0.00           C  
ATOM   3313  C   CNT A  94     -44.839  63.536  21.110  1.00  0.00           C  
ATOM   3314  C   CNT A  94     -44.622  62.477  20.150  2.00  0.00           C  
ATOM   3315  C   CNT A  94     -45.652  61.929  22.740  5.00  0.00           C  
ATOM   3316  C   CNT A  94     -45.551  60.957  21.740  4.00  0.00           C  
ATOM   3317  C   CNT A  94     -45.066  61.209  20.450  2.00  0.00           C  
ATOM   3318  C   CNT A  94     -45.413  60.396  19.290  0.00  0.00           C  
ATOM   3319  C   CNT A  94     -46.404  59.816  21.840  1.00  0.00           C  
ATOM   3320  C   CNT A  94     -47.006  59.267  20.680  8.00  0.00           C  
ATOM   3321  C   CNT A  94     -46.482  59.524  19.430  0.00  0.00           C  
ATOM   3322  C   CNT A  94     -47.236  59.271  18.260  7.00  0.00           C  
ATOM   3323  C   CNT A  94     -48.369  58.775  20.760  7.00  0.00           C  
ATOM   3324  C   CNT A  94     -49.173  58.863  19.610  8.00  0.00           C  
ATOM   3325  C   CNT A  94     -48.608  59.281  18.380  1.00  0.00           C  
ATOM   3326  C   CNT A  94     -49.391  60.002  17.440  8.00  0.00           C  
ATOM   3327  C   CNT A  94     -50.514  59.220  19.900  9.00  0.00           C  
ATOM   3328  C   CNT A  94     -51.136  60.121  19.110  8.00  0.00           C  
ATOM   3329  C   CNT A  94     -50.559  60.570  17.910  0.00  0.00           C  
ATOM   3330  C   CNT A  94     -51.219  61.647  17.140  9.00  0.00           C  
ATOM   3331  C   CNT A  94     -52.079  60.994  19.720  8.00  0.00           C  
ATOM   3332  C   CNT A  94     -52.184  62.293  19.250  9.00  0.00           C  
ATOM   3333  C   CNT A  94     -51.848  62.606  17.930  7.00  0.00           C  
ATOM   3334  C   CNT A  94     -51.644  63.938  17.530  6.00  0.00           C  
ATOM   3335  C   CNT A  94     -51.154  64.291  16.270  2.00  0.00           C  
ATOM   3336  C   CNT A  94     -50.551  65.555  16.090  6.00  0.00           C  
ATOM   3337  C   CNT A  94     -50.031  65.878  14.810  9.00  0.00           C  
ATOM   3338  C   CNT A  94     -49.162  66.955  14.700  8.00  0.00           C  
ATOM   3339  C   CNT A  94     -50.154  66.225  17.260  1.00  0.00           C  
ATOM   3340  C   CNT A  94     -49.030  67.092  17.110  4.00  0.00           C  
ATOM   3341  C   CNT A  94     -48.544  67.498  15.880  1.00  0.00           C  
ATOM   3342  C   CNT A  94     -47.231  67.970  15.760  1.00  0.00           C  
ATOM   3343  C   CNT A  94     -48.272  67.335  18.290  6.00  0.00           C  
ATOM   3344  C   CNT A  94     -46.865  67.420  18.090  1.00  0.00           C  
ATOM   3345  C   CNT A  94     -46.315  67.693  16.810  9.00  0.00           C  
ATOM   3346  C   CNT A  94     -45.014  67.412  16.560  7.00  0.00           C  
ATOM   3347  C   CNT A  94     -46.011  66.925  19.080  9.00  0.00           C  
ATOM   3348  C   CNT A  94     -44.843  66.310  18.640  6.00  0.00           C  
ATOM   3349  C   CNT A  94     -44.314  66.565  17.380  8.00  0.00           C  
ATOM   3350  C   CNT A  94     -43.328  65.742  16.840  4.00  0.00           C  
ATOM   3351  C   CNT A  94     -44.397  65.211  19.340  2.00  0.00           C  
ATOM   3352  C   CNT A  94     -43.794  64.168  18.630  4.00  0.00           C  
ATOM   3353  C   CNT A  94     -43.219  64.460  17.340  3.00  0.00           C  
ATOM   3354  C   CNT A  94     -42.883  63.417  16.530  0.00  0.00           C  
ATOM   3355  C   CNT A  94     -44.102  62.804  18.860  8.00  0.00           C  
ATOM   3356  C   CNT A  94     -44.023  61.785  17.930  2.00  0.00           C  
ATOM   3357  C   CNT A  94     -43.434  62.111  16.700  2.00  0.00           C  
ATOM   3358  C   CNT A  94     -43.779  61.318  15.550  0.00  0.00           C  
ATOM   3359  C   CNT A  94     -44.752  60.607  18.090  6.00  0.00           C  
ATOM   3360  C   CNT A  94     -45.346  60.073  16.910  4.00  0.00           C  
ATOM   3361  C   CNT A  94     -44.939  60.536  15.630  4.00  0.00           C  
ATOM   3362  C   CNT A  94     -45.679  60.395  14.470  7.00  0.00           C  
ATOM   3363  C   CNT A  94     -46.673  59.601  17.010  7.00  0.00           C  
ATOM   3364  C   CNT A  94     -47.518  59.990  15.940  4.00  0.00           C  
ATOM   3365  C   CNT A  94     -47.050  60.236  14.560  6.00  0.00           C  
ATOM   3366  C   CNT A  94     -47.921  60.890  13.630  4.00  0.00           C  
ATOM   3367  C   CNT A  94     -48.853  60.322  16.230  3.00  0.00           C  
ATOM   3368  C   CNT A  94     -49.561  61.218  15.370  5.00  0.00           C  
ATOM   3369  C   CNT A  94     -49.131  61.471  14.110  1.00  0.00           C  
ATOM   3370  C   CNT A  94     -49.729  62.559  13.300  7.00  0.00           C  
ATOM   3371  C   CNT A  94     -50.609  61.996  15.920  6.00  0.00           C  
ATOM   3372  C   CNT A  94     -50.764  63.252  15.350  9.00  0.00           C  
ATOM   3373  C   CNT A  94     -50.285  63.582  14.110  5.00  0.00           C  
ATOM   3374  C   CNT A  94     -50.091  64.964  13.750  0.00  0.00           C  
ATOM   3375  C   CNT A  94     -49.623  65.233  12.500  5.00  0.00           C  
ATOM   3376  C   CNT A  94     -48.883  66.457  12.330  5.00  0.00           C  
ATOM   3377  C   CNT A  94     -48.462  66.823  11.050  3.00  0.00           C  
ATOM   3378  C   CNT A  94     -47.727  68.002  10.930  1.00  0.00           C  
ATOM   3379  C   CNT A  94     -48.558  67.174  13.470  0.00  0.00           C  
ATOM   3380  C   CNT A  94     -47.505  68.086  13.370  8.00  0.00           C  
ATOM   3381  C   CNT A  94     -47.042  68.470  12.080  3.00  0.00           C  
ATOM   3382  C   CNT A  94     -45.668  68.762  11.990  0.00  0.00           C  
ATOM   3383  C   CNT A  94     -46.725  68.301  14.500  0.00  0.00           C  
ATOM   3384  C   CNT A  94     -45.330  68.356  14.350  0.00  0.00           C  
ATOM   3385  C   CNT A  94     -44.807  68.606  13.110  0.00  0.00           C  
ATOM   3386  C   CNT A  94     -43.468  68.398  12.880  2.00  0.00           C  
ATOM   3387  C   CNT A  94     -44.492  67.765  15.310  1.00  0.00           C  
ATOM   3388  C   CNT A  94     -43.294  67.180  14.890  7.00  0.00           C  
ATOM   3389  C   CNT A  94     -42.740  67.560  13.680  7.00  0.00           C  
ATOM   3390  C   CNT A  94     -41.731  66.740  13.140  7.00  0.00           C  
ATOM   3391  C   CNT A  94     -42.814  66.077  15.620  5.00  0.00           C  
ATOM   3392  C   CNT A  94     -42.144  65.073  14.920  2.00  0.00           C  
ATOM   3393  C   CNT A  94     -41.574  65.411  13.670  0.00  0.00           C  
ATOM   3394  C   CNT A  94     -41.139  64.375  12.830  4.00  0.00           C  
ATOM   3395  C   CNT A  94     -42.283  63.716  15.290  0.00  0.00           C  
ATOM   3396  C   CNT A  94     -42.338  62.764  14.290  6.00  0.00           C  
ATOM   3397  C   CNT A  94     -41.784  63.141  13.030  6.00  0.00           C  
ATOM   3398  C   CNT A  94     -42.233  62.477  11.850  9.00  0.00           C  
ATOM   3399  C   CNT A  94     -43.189  61.621  14.320  5.00  0.00           C  
ATOM   3400  C   CNT A  94     -43.875  61.363  13.120  9.00  0.00           C  
ATOM   3401  C   CNT A  94     -43.407  61.736  11.940  1.00  0.00           C  
ATOM   3402  C   CNT A  94     -44.204  61.546  10.730  4.00  0.00           C  
ATOM   3403  C   CNT A  94     -45.181  60.810  13.230  1.00  0.00           C  
ATOM   3404  C   CNT A  94     -46.102  61.092  12.170  0.00  0.00           C  
ATOM   3405  C   CNT A  94     -45.583  61.342  10.870  3.00  0.00           C  
ATOM   3406  C   CNT A  94     -46.402  61.787   9.870  2.00  0.00           C  
ATOM   3407  C   CNT A  94     -47.428  61.321  12.390  4.00  0.00           C  
ATOM   3408  C   CNT A  94     -48.141  62.145  11.510  9.00  0.00           C  
ATOM   3409  C   CNT A  94     -47.589  62.433  10.250  7.00  0.00           C  
ATOM   3410  C   CNT A  94     -48.061  63.594   9.600  4.00  0.00           C  
ATOM   3411  C   CNT A  94     -49.161  62.943  12.090  1.00  0.00           C  
ATOM   3412  C   CNT A  94     -49.422  64.233  11.550  3.00  0.00           C  
ATOM   3413  C   CNT A  94     -48.803  64.529  10.320  9.00  0.00           C  
ATOM   3414  C   CNT A  94     -48.563  65.862   9.970  5.00  0.00           C  
ATOM   3415  C   CNT A  94     -48.040  66.277   8.770  1.00  0.00           C  
ATOM   3416  C   CNT A  94     -47.505  67.546   8.590  3.00  0.00           C  
ATOM   3417  C   CNT A  94     -47.000  67.933   7.300  9.00  0.00           C  
ATOM   3418  C   CNT A  94     -46.060  68.952   7.220  7.00  0.00           C  
ATOM   3419  C   CNT A  94     -47.168  68.376   9.710  4.00  0.00           C  
ATOM   3420  C   CNT A  94     -45.972  69.031   9.620  7.00  0.00           C  
ATOM   3421  C   CNT A  94     -45.415  69.372   8.400  1.00  0.00           C  
ATOM   3422  C   CNT A  94     -44.102  69.776   8.350  6.00  0.00           C  
ATOM   3423  C   CNT A  94     -45.120  69.146  10.750  5.00  0.00           C  
ATOM   3424  C   CNT A  94     -43.777  69.310  10.650  9.00  0.00           C  
ATOM   3425  C   CNT A  94     -43.234  69.597   9.440  9.00  0.00           C  
ATOM   3426  C   CNT A  94     -41.869  69.364   9.150  9.00  0.00           C  
ATOM   3427  C   CNT A  94     -42.940  68.696  11.610  0.00  0.00           C  
ATOM   3428  C   CNT A  94     -41.723  68.180  11.180  4.00  0.00           C  
ATOM   3429  C   CNT A  94     -41.190  68.474   9.940  3.00  0.00           C  
ATOM   3430  C   CNT A  94     -40.227  67.639   9.350  7.00  0.00           C  
ATOM   3431  C   CNT A  94     -41.214  67.095  11.920  1.00  0.00           C  
ATOM   3432  C   CNT A  94     -40.579  66.050  11.180  7.00  0.00           C  
ATOM   3433  C   CNT A  94     -39.926  66.396   9.940  7.00  0.00           C  
ATOM   3434  C   CNT A  94     -39.542  65.351   9.050  2.00  0.00           C  
ATOM   3435  C   CNT A  94     -40.661  64.689  11.520  1.00  0.00           C  
ATOM   3436  C   CNT A  94     -40.615  63.710  10.520  5.00  0.00           C  
ATOM   3437  C   CNT A  94     -40.083  64.072   9.260  1.00  0.00           C  
ATOM   3438  C   CNT A  94     -40.635  63.477   8.110  3.00  0.00           C  
ATOM   3439  C   CNT A  94     -41.644  62.736  10.610  3.00  0.00           C  
ATOM   3440  C   CNT A  94     -42.353  62.435   9.470  0.00  0.00           C  
ATOM   3441  C   CNT A  94     -41.855  62.749   8.150  8.00  0.00           C  
ATOM   3442  C   CNT A  94     -42.603  62.549   6.960  0.00  0.00           C  
ATOM   3443  C   CNT A  94     -43.654  61.885   9.480  3.00  0.00           C  
ATOM   3444  C   CNT A  94     -44.489  62.108   8.400  1.00  0.00           C  
ATOM   3445  C   CNT A  94     -43.973  62.293   7.090  8.00  0.00           C  
ATOM   3446  C   CNT A  94     -44.781  62.964   6.180  2.00  0.00           C  
ATOM   3447  C   CNT A  94     -45.831  62.245   8.690  6.00  0.00           C  
ATOM   3448  C   CNT A  94     -46.617  63.051   7.750  8.00  0.00           C  
ATOM   3449  C   CNT A  94     -46.038  63.442   6.490  8.00  0.00           C  
ATOM   3450  C   CNT A  94     -46.536  64.607   5.870  5.00  0.00           C  
ATOM   3451  C   CNT A  94     -47.631  63.940   8.270  8.00  0.00           C  
ATOM   3452  C   CNT A  94     -47.696  65.268   7.840  9.00  0.00           C  
ATOM   3453  C   CNT A  94     -47.126  65.609   6.630  0.00  0.00           C  
ATOM   3454  C   CNT A  94     -46.979  66.975   6.250  8.00  0.00           C  
ATOM   3455  C   CNT A  94     -46.437  67.318   5.010  1.00  0.00           C  
ATOM   3456  C   CNT A  94     -45.933  68.604   4.840  0.00  0.00           C  
ATOM   3457  C   CNT A  94     -45.314  68.865   3.590  9.00  0.00           C  
ATOM   3458  C   CNT A  94     -44.482  69.983   3.490  1.00  0.00           C  
ATOM   3459  C   CNT A  94     -45.509  69.284   5.980  5.00  0.00           C  
ATOM   3460  C   CNT A  94     -44.382  70.090   5.910  7.00  0.00           C  
ATOM   3461  C   CNT A  94     -43.788  70.337   4.680  1.00  0.00           C  
ATOM   3462  C   CNT A  94     -42.503  70.822   4.610  0.00  0.00           C  
ATOM   3463  C   CNT A  94     -43.618  70.211   7.110  9.00  0.00           C  
ATOM   3464  C   CNT A  94     -42.229  70.305   6.900  5.00  0.00           C  
ATOM   3465  C   CNT A  94     -41.615  70.689   5.640  7.00  0.00           C  
ATOM   3466  C   CNT A  94     -40.283  70.467   5.360  1.00  0.00           C  
ATOM   3467  C   CNT A  94     -41.391  69.764   7.890  7.00  0.00           C  
ATOM   3468  C   CNT A  94     -40.160  69.273   7.500  4.00  0.00           C  
ATOM   3469  C   CNT A  94     -39.548  69.688   6.290  8.00  0.00           C  
ATOM   3470  C   CNT A  94     -38.521  68.817   5.700  4.00  0.00           C  
ATOM   3471  C   CNT A  94     -39.699  68.065   8.140  4.00  0.00           C  
ATOM   3472  C   CNT A  94     -38.938  67.113   7.420  9.00  0.00           C  
ATOM   3473  C   CNT A  94     -38.385  67.520   6.190  0.00  0.00           C  
ATOM   3474  C   CNT A  94     -38.120  66.501   5.240  3.00  0.00           C  
ATOM   3475  C   CNT A  94     -39.122  65.755   7.780  4.00  0.00           C  
ATOM   3476  C   CNT A  94     -39.168  64.853   6.710  1.00  0.00           C  
ATOM   3477  C   CNT A  94     -38.768  65.233   5.400  2.00  0.00           C  
ATOM   3478  C   CNT A  94     -39.167  64.465   4.320  2.00  0.00           C  
ATOM   3479  C   CNT A  94     -40.096  63.782   6.810  9.00  0.00           C  
ATOM   3480  C   CNT A  94     -40.753  63.341   5.670  6.00  0.00           C  
ATOM   3481  C   CNT A  94     -40.238  63.569   4.390  3.00  0.00           C  
ATOM   3482  C   CNT A  94     -41.046  63.440   3.220  7.00  0.00           C  
ATOM   3483  C   CNT A  94     -42.048  62.830   5.750  1.00  0.00           C  
ATOM   3484  C   CNT A  94     -42.939  63.119   4.670  8.00  0.00           C  
ATOM   3485  C   CNT A  94     -42.433  63.274   3.390  5.00  0.00           C  
ATOM   3486  C   CNT A  94     -43.231  63.970   2.470  7.00  0.00           C  
ATOM   3487  C   CNT A  94     -44.226  63.385   5.000  6.00  0.00           C  
ATOM   3488  C   CNT A  94     -45.012  64.153   4.120  7.00  0.00           C  
ATOM   3489  C   CNT A  94     -44.528  64.437   2.860  4.00  0.00           C  
ATOM   3490  C   CNT A  94     -44.995  65.572   2.160  1.00  0.00           C  
ATOM   3491  C   CNT A  94     -45.978  65.011   4.670  5.00  0.00           C  
ATOM   3492  C   CNT A  94     -46.123  66.280   4.130  1.00  0.00           C  
ATOM   3493  C   CNT A  94     -45.589  66.551   2.920  4.00  0.00           C  
ATOM   3494  C   CNT A  94     -45.356  67.895   2.550  5.00  0.00           C  
ATOM   3495  C   CNT A  94     -44.774  68.257   1.330  0.00  0.00           C  
ATOM   3496  C   CNT A  94     -44.319  69.593   1.140  7.00  0.00           C  
ATOM   3497  C   CNT A  94     -43.790  69.913  -0.120  1.00  0.00           C  
ATOM   3498  C   CNT A  94     -42.901  71.003  -0.260  3.00  0.00           C  
ATOM   3499  C   CNT A  94     -43.935  70.348   2.240  4.00  0.00           C  
ATOM   3500  C   CNT A  94     -42.834  71.209   2.180  2.00  0.00           C  
ATOM   3501  C   CNT A  94     -42.319  71.526   0.900  4.00  0.00           C  
ATOM   3502  C   CNT A  94     -40.987  71.991   0.770  9.00  0.00           C  
ATOM   3503  C   CNT A  94     -42.025  71.284   3.320  9.00  0.00           C  
ATOM   3504  C   CNT A  94     -40.595  71.408   3.170  2.00  0.00           C  
ATOM   3505  C   CNT A  94     -40.116  71.789   1.870  3.00  0.00           C  
ATOM   3506  C   CNT A  94     -38.762  71.447   1.590  3.00  0.00           C  
ATOM   3507  C   CNT A  94     -39.743  70.879   4.160  2.00  0.00           C  
ATOM   3508  C   CNT A  94     -38.543  70.272   3.650  6.00  0.00           C  
ATOM   3509  C   CNT A  94     -38.029  70.592   2.390  3.00  0.00           C  
ATOM   3510  C   CNT A  94     -36.961  69.803   1.870  0.00  0.00           C  
ATOM   3511  C   CNT A  94     -38.046  69.178   4.400  9.00  0.00           C  
ATOM   3512  C   CNT A  94     -37.468  68.158   3.650  3.00  0.00           C  
ATOM   3513  C   CNT A  94     -36.894  68.515   2.390  0.00  0.00           C  
ATOM   3514  C   CNT A  94     -36.555  67.492   1.530  2.00  0.00           C  
ATOM   3515  C   CNT A  94     -37.557  66.805   3.960  4.00  0.00           C  
ATOM   3516  C   CNT A  94     -37.660  65.829   2.990  1.00  0.00           C  
ATOM   3517  C   CNT A  94     -37.188  66.237   1.700  2.00  0.00           C  
ATOM   3518  C   CNT A  94     -37.593  65.476   0.570  0.00  0.00           C  
ATOM   3519  C   CNT A  94     -38.672  64.832   3.070  4.00  0.00           C  
ATOM   3520  C   CNT A  94     -39.226  64.313   1.900  0.00  0.00           C  
ATOM   3521  C   CNT A  94     -38.724  64.649   0.640  5.00  0.00           C  
ATOM   3522  C   CNT A  94     -39.556  64.523  -0.460  6.00  0.00           C  
ATOM   3523  C   CNT A  94     -40.481  63.750   1.930  7.00  0.00           C  
ATOM   3524  C   CNT A  94     -41.401  63.937   0.880  6.00  0.00           C  
ATOM   3525  C   CNT A  94     -40.926  64.197  -0.420  1.00  0.00           C  
ATOM   3526  C   CNT A  94     -41.729  64.873  -1.400  1.00  0.00           C  
ATOM   3527  C   CNT A  94     -42.713  64.241   1.210  8.00  0.00           C  
ATOM   3528  C   CNT A  94     -43.461  65.027   0.380  1.00  0.00           C  
ATOM   3529  C   CNT A  94     -42.985  65.367  -0.990  8.00  0.00           C  
ATOM   3530  C   CNT A  94     -43.389  66.597  -1.570  9.00  0.00           C  
ATOM   3531  C   CNT A  94     -44.411  65.836   0.940  6.00  0.00           C  
ATOM   3532  C   CNT A  94     -44.400  67.227   0.520  1.00  0.00           C  
ATOM   3533  C   CNT A  94     -43.886  67.614  -0.780  6.00  0.00           C  
ATOM   3534  C   CNT A  94     -43.852  68.961  -1.140  7.00  0.00           C  
ATOM   3535  C   CNT A  94     -43.406  69.310  -2.450  1.00  0.00           C  
ATOM   3536  C   CNT A  94     -42.852  70.626  -2.640  8.00  0.00           C  
ATOM   3537  C   CNT A  94     -42.443  70.986  -3.940  2.00  0.00           C  
ATOM   3538  C   CNT A  94     -41.735  72.188  -3.960  7.00  0.00           C  
ATOM   3539  C   CNT A  94     -42.406  71.291  -1.470  3.00  0.00           C  
ATOM   3540  C   CNT A  94     -41.273  72.122  -1.590  3.00  0.00           C  
ATOM   3541  C   CNT A  94     -40.788  72.481  -2.890  6.00  0.00           C  
ATOM   3542  C   CNT A  94     -39.477  72.932  -2.940  5.00  0.00           C  
ATOM   3543  C   CNT A  94     -40.453  72.243  -0.460  9.00  0.00           C  
ATOM   3544  C   CNT A  94     -39.061  72.348  -0.650  2.00  0.00           C  
ATOM   3545  C   CNT A  94     -38.502  72.747  -1.900  6.00  0.00           C  
ATOM   3546  C   CNT A  94     -37.119  72.503  -2.020  3.00  0.00           C  
ATOM   3547  C   CNT A  94     -38.233  71.713   0.320  7.00  0.00           C  
ATOM   3548  C   CNT A  94     -37.034  71.094  -0.140  3.00  0.00           C  
ATOM   3549  C   CNT A  94     -36.411  71.515  -1.360  6.00  0.00           C  
ATOM   3550  C   CNT A  94     -35.296  70.743  -1.740  5.00  0.00           C  
ATOM   3551  C   CNT A  94     -36.407  70.117   0.590  6.00  0.00           C  
ATOM   3552  C   CNT A  94     -35.674  69.161  -0.040  7.00  0.00           C  
ATOM   3553  C   CNT A  94     -35.050  69.453  -1.290  7.00  0.00           C  
ATOM   3554  C   CNT A  94     -34.651  68.289  -2.000  7.00  0.00           C  
ATOM   3555  C   CNT A  94     -35.877  67.831   0.340  2.00  0.00           C  
ATOM   3556  C   CNT A  94     -35.987  66.840  -0.700  7.00  0.00           C  
ATOM   3557  C   CNT A  94     -35.376  67.067  -1.990  2.00  0.00           C  
ATOM   3558  C   CNT A  94     -35.655  66.066  -2.920  3.00  0.00           C  
ATOM   3559  C   CNT A  94     -37.073  65.945  -0.630  8.00  0.00           C  
ATOM   3560  C   CNT A  94     -37.634  65.451  -1.810  2.00  0.00           C  
ATOM   3561  C   CNT A  94     -37.004  65.598  -3.050  2.00  0.00           C  
ATOM   3562  C   CNT A  94     -37.876  65.377  -4.180  4.00  0.00           C  
ATOM   3563  C   CNT A  94     -38.946  64.845  -1.750  4.00  0.00           C  
ATOM   3564  C   CNT A  94     -39.804  65.052  -2.890  7.00  0.00           C  
ATOM   3565  C   CNT A  94     -39.299  65.287  -4.180  7.00  0.00           C  
ATOM   3566  C   CNT A  94     -40.235  65.772  -5.140  7.00  0.00           C  
ATOM   3567  C   CNT A  94     -41.163  65.256  -2.620  1.00  0.00           C  
ATOM   3568  C   CNT A  94     -41.853  66.192  -3.380  6.00  0.00           C  
ATOM   3569  C   CNT A  94     -41.449  66.405  -4.780  7.00  0.00           C  
ATOM   3570  C   CNT A  94     -42.109  67.504  -5.400  7.00  0.00           C  
ATOM   3571  C   CNT A  94     -42.941  66.917  -2.870  4.00  0.00           C  
ATOM   3572  C   CNT A  94     -43.245  68.189  -3.390  0.00  0.00           C  
ATOM   3573  C   CNT A  94     -42.779  68.551  -4.680  3.00  0.00           C  
ATOM   3574  C   CNT A  94     -42.747  69.991  -4.900  3.00  0.00           C  
END
