# Supplementary material for: Molecular Dynamics Study of the Interaction of Carbon Nanotubes with Telomeric DNA Fragment Containing Noncanonical G-Quadruplex and i-Motif Forms
Source: Int J Mol Sci. 2020 Mar 11;21(6):1925. doi: 10.3390/ijms21061925 (PMC7139311; doi:10.3390/ijms21061925)
Supplement: Supplementary file 1 [file ijms-21-01925-s001.zip › fig7_n20.pdb]

ATOM      1  C5' DG5 A   1       7.396  -2.597 -38.740  6.00  0.00           C  
ATOM      2  O5' DG5 A   1       7.357  -3.982 -38.720  9.00  0.00           O  
ATOM      3  C4' DG5 A   1       7.343  -2.110 -40.200  7.00  0.00           C  
ATOM      4  O4' DG5 A   1       8.485  -2.482 -41.000  6.00  0.00           O  
ATOM      5  C3' DG5 A   1       6.113  -2.740 -40.920  7.00  0.00           C  
ATOM      6  O3' DG5 A   1       5.427  -1.708 -41.540  5.00  0.00           O  
ATOM      7  C2' DG5 A   1       6.767  -3.696 -41.810  6.00  0.00           C  
ATOM      8  C1' DG5 A   1       7.994  -3.006 -42.270  1.00  0.00           C  
ATOM      9  N1  DG5 A   1       8.659  -6.556 -45.840  0.00  0.00           N  
ATOM     10  C2  DG5 A   1       7.607  -5.789 -45.590  8.00  0.00           C  
ATOM     11  N2  DG5 A   1       6.653  -5.809 -46.490  1.00  0.00           N  
ATOM     12  N3  DG5 A   1       7.610  -4.819 -44.690  5.00  0.00           N  
ATOM     13  C4  DG5 A   1       8.744  -4.746 -43.970  0.00  0.00           C  
ATOM     14  C5  DG5 A   1       9.857  -5.624 -44.050  1.00  0.00           C  
ATOM     15  C6  DG5 A   1       9.804  -6.660 -45.060  2.00  0.00           C  
ATOM     16  O6  DG5 A   1      10.637  -7.418 -45.480  1.00  0.00           O  
ATOM     17  N7  DG5 A   1      10.874  -5.147 -43.210  8.00  0.00           N  
ATOM     18  C8  DG5 A   1      10.291  -4.121 -42.670  5.00  0.00           C  
ATOM     19  N9  DG5 A   1       8.997  -3.908 -42.940  3.00  0.00           N  
ATOM     20 HO5' DG5 A   1       8.159  -4.405 -39.210  7.00  0.00           H  
ATOM     21  H1  DG5 A   1       8.601  -7.172 -46.660  7.00  0.00           H  
ATOM     22  H8  DG5 A   1      10.710  -3.544 -41.850  3.00  0.00           H  
ATOM     23  H1' DG5 A   1       7.793  -2.192 -43.000  7.00  0.00           H  
ATOM     24  H2' DG5 A   1       7.057  -4.573 -41.250  2.00  0.00           H  
ATOM     25  H21 DG5 A   1       6.716  -6.560 -47.220  1.00  0.00           H  
ATOM     26  H3' DG5 A   1       5.445  -3.226 -40.280  6.00  0.00           H  
ATOM     27  H22 DG5 A   1       5.817  -5.349 -46.270  5.00  0.00           H  
ATOM     28  H4' DG5 A   1       7.401  -1.016 -40.180  5.00  0.00           H  
ATOM     29  H5' DG5 A   1       8.341  -2.128 -38.370  6.00  0.00           H  
ATOM     30 H2'' DG5 A   1       6.182  -4.057 -42.610  6.00  0.00           H  
ATOM     31 H5'' DG5 A   1       6.613  -2.197 -38.080  4.00  0.00           H  
ATOM     32  P    DG A   2       3.885  -1.746 -41.790  1.00  0.00           P  
ATOM     33  C5'  DG A   2       3.302  -2.556 -44.180  9.00  0.00           C  
ATOM     34  O5'  DG A   2       3.445  -2.866 -42.790  7.00  0.00           O  
ATOM     35  C4'  DG A   2       2.828  -3.786 -44.960  0.00  0.00           C  
ATOM     36  O4'  DG A   2       3.743  -4.821 -45.180  5.00  0.00           O  
ATOM     37  C3'  DG A   2       1.564  -4.472 -44.320  0.00  0.00           C  
ATOM     38  O3'  DG A   2       0.748  -4.856 -45.400  5.00  0.00           O  
ATOM     39  C2'  DG A   2       2.192  -5.665 -43.610  7.00  0.00           C  
ATOM     40  C1'  DG A   2       3.214  -6.032 -44.630  2.00  0.00           C  
ATOM     41  N1   DG A   2       6.082 -10.177 -45.340  0.00  0.00           N  
ATOM     42  C2   DG A   2       5.134  -9.592 -46.120  5.00  0.00           C  
ATOM     43  N2   DG A   2       4.641 -10.259 -47.090  9.00  0.00           N  
ATOM     44  N3   DG A   2       4.485  -8.536 -45.790  1.00  0.00           N  
ATOM     45  C4   DG A   2       4.883  -7.911 -44.690  4.00  0.00           C  
ATOM     46  C5   DG A   2       5.905  -8.375 -43.860  0.00  0.00           C  
ATOM     47  C6   DG A   2       6.578  -9.585 -44.180  2.00  0.00           C  
ATOM     48  O6   DG A   2       7.481 -10.159 -43.570  4.00  0.00           O  
ATOM     49  N7   DG A   2       6.064  -7.465 -42.800  5.00  0.00           N  
ATOM     50  C8   DG A   2       5.117  -6.556 -43.020  9.00  0.00           C  
ATOM     51  N9   DG A   2       4.416  -6.739 -44.160  5.00  0.00           N  
ATOM     52  OP1  DG A   2       3.595  -0.433 -42.370  6.00  0.00           O  
ATOM     53  OP2  DG A   2       3.239  -2.092 -40.470  5.00  0.00           O1-
ATOM     54  H1   DG A   2       6.491 -11.049 -45.700  6.00  0.00           H  
ATOM     55  H8   DG A   2       4.824  -5.733 -42.310  4.00  0.00           H  
ATOM     56  H1'  DG A   2       2.680  -6.583 -45.490  4.00  0.00           H  
ATOM     57  H2'  DG A   2       2.602  -5.412 -42.600  1.00  0.00           H  
ATOM     58  H21  DG A   2       4.799 -11.282 -47.040  5.00  0.00           H  
ATOM     59  H3'  DG A   2       1.111  -3.773 -43.690  8.00  0.00           H  
ATOM     60  H22  DG A   2       3.825  -9.856 -47.550  9.00  0.00           H  
ATOM     61  H4'  DG A   2       2.487  -3.287 -45.900  0.00  0.00           H  
ATOM     62  H5'  DG A   2       4.295  -2.240 -44.590  2.00  0.00           H  
ATOM     63 H2''  DG A   2       1.509  -6.545 -43.580  7.00  0.00           H  
ATOM     64 H5''  DG A   2       2.687  -1.694 -44.290  0.00  0.00           H  
ATOM     65  P    DG A   3      -0.752  -5.298 -45.060  4.00  0.00           P  
ATOM     66  C5'  DG A   3      -0.716  -7.428 -46.420  6.00  0.00           C  
ATOM     67  O5'  DG A   3      -0.689  -6.834 -45.180  9.00  0.00           O  
ATOM     68  C4'  DG A   3      -0.280  -8.928 -46.430  9.00  0.00           C  
ATOM     69  O4'  DG A   3       1.074  -9.196 -46.000  5.00  0.00           O  
ATOM     70  C3'  DG A   3      -1.159  -9.969 -45.630  2.00  0.00           C  
ATOM     71  O3'  DG A   3      -1.680 -10.971 -46.510  7.00  0.00           O  
ATOM     72  C2'  DG A   3      -0.174 -10.585 -44.640  4.00  0.00           C  
ATOM     73  C1'  DG A   3       1.155 -10.495 -45.380  6.00  0.00           C  
ATOM     74  N1   DG A   3       4.972 -13.112 -43.550  6.00  0.00           N  
ATOM     75  C2   DG A   3       4.184 -13.388 -44.670  6.00  0.00           C  
ATOM     76  N2   DG A   3       4.246 -14.542 -45.290  0.00  0.00           N  
ATOM     77  N3   DG A   3       3.143 -12.643 -45.030  5.00  0.00           N  
ATOM     78  C4   DG A   3       3.084 -11.505 -44.260  5.00  0.00           C  
ATOM     79  C5   DG A   3       3.764 -11.209 -43.120  1.00  0.00           C  
ATOM     80  C6   DG A   3       4.848 -12.077 -42.690  2.00  0.00           C  
ATOM     81  O6   DG A   3       5.604 -12.011 -41.690  7.00  0.00           O  
ATOM     82  N7   DG A   3       3.356 -10.041 -42.510  1.00  0.00           N  
ATOM     83  C8   DG A   3       2.378  -9.632 -43.280  3.00  0.00           C  
ATOM     84  N9   DG A   3       2.211 -10.425 -44.380  9.00  0.00           N  
ATOM     85  OP1  DG A   3      -1.545  -4.681 -46.130  0.00  0.00           O  
ATOM     86  OP2  DG A   3      -1.047  -5.065 -43.570  5.00  0.00           O1-
ATOM     87  H1   DG A   3       5.789 -13.713 -43.400  9.00  0.00           H  
ATOM     88  H8   DG A   3       1.840  -8.706 -43.150  6.00  0.00           H  
ATOM     89  H1'  DG A   3       1.264 -11.317 -46.090  4.00  0.00           H  
ATOM     90  H2'  DG A   3      -0.165 -10.095 -43.710  8.00  0.00           H  
ATOM     91  H21  DG A   3       4.948 -15.190 -44.950  5.00  0.00           H  
ATOM     92  H3'  DG A   3      -1.915  -9.463 -45.050  7.00  0.00           H  
ATOM     93  H22  DG A   3       3.416 -14.808 -45.740  0.00  0.00           H  
ATOM     94  H4'  DG A   3      -0.301  -9.236 -47.520  7.00  0.00           H  
ATOM     95  H5'  DG A   3      -0.050  -6.867 -47.050  4.00  0.00           H  
ATOM     96 H2''  DG A   3      -0.376 -11.555 -44.470  3.00  0.00           H  
ATOM     97 H5''  DG A   3      -1.732  -7.346 -46.900  7.00  0.00           H  
ATOM     98  P    DT A   4      -2.781 -12.136 -46.030  3.00  0.00           P  
ATOM     99  C5'  DT A   4      -1.519 -14.177 -47.090  1.00  0.00           C  
ATOM    100  O5'  DT A   4      -1.969 -13.516 -45.900  7.00  0.00           O  
ATOM    101  C4'  DT A   4      -0.620 -15.372 -46.780  2.00  0.00           C  
ATOM    102  O4'  DT A   4       0.407 -14.974 -45.910  4.00  0.00           O  
ATOM    103  C3'  DT A   4      -1.367 -16.581 -46.120  9.00  0.00           C  
ATOM    104  O3'  DT A   4      -0.993 -17.766 -46.890  2.00  0.00           O  
ATOM    105  C2'  DT A   4      -0.736 -16.623 -44.700  5.00  0.00           C  
ATOM    106  C1'  DT A   4       0.681 -16.057 -44.940  8.00  0.00           C  
ATOM    107  N1   DT A   4       1.270 -15.385 -43.800  2.00  0.00           N  
ATOM    108  C2   DT A   4       2.341 -16.049 -43.200  9.00  0.00           C  
ATOM    109  O2   DT A   4       2.780 -17.094 -43.600  7.00  0.00           O  
ATOM    110  N3   DT A   4       2.912 -15.491 -42.100  2.00  0.00           N  
ATOM    111  C4   DT A   4       2.399 -14.364 -41.490  7.00  0.00           C  
ATOM    112  O4   DT A   4       2.929 -14.137 -40.380  8.00  0.00           O  
ATOM    113  C5   DT A   4       1.381 -13.624 -42.180  7.00  0.00           C  
ATOM    114  C6   DT A   4       0.797 -14.203 -43.290  7.00  0.00           C  
ATOM    115  C7   DT A   4       0.806 -12.368 -41.570  2.00  0.00           C  
ATOM    116  OP1  DT A   4      -3.680 -12.153 -47.200  8.00  0.00           O  
ATOM    117  OP2  DT A   4      -3.329 -11.710 -44.690  3.00  0.00           O1-
ATOM    118  H3   DT A   4       3.519 -16.028 -41.500  0.00  0.00           H  
ATOM    119  H6   DT A   4       0.003 -13.621 -43.800  7.00  0.00           H  
ATOM    120  H1'  DT A   4       1.355 -16.839 -45.420  3.00  0.00           H  
ATOM    121  H2'  DT A   4      -1.218 -15.940 -44.020  5.00  0.00           H  
ATOM    122  H3'  DT A   4      -2.470 -16.382 -45.980  4.00  0.00           H  
ATOM    123  H4'  DT A   4      -0.160 -15.688 -47.780  9.00  0.00           H  
ATOM    124  H5'  DT A   4      -0.885 -13.482 -47.550  8.00  0.00           H  
ATOM    125  H71  DT A   4       1.422 -12.083 -40.760  8.00  0.00           H  
ATOM    126  H72  DT A   4       0.952 -11.561 -42.300  6.00  0.00           H  
ATOM    127  H73  DT A   4      -0.233 -12.549 -41.230  5.00  0.00           H  
ATOM    128 H2''  DT A   4      -0.677 -17.594 -44.260  9.00  0.00           H  
ATOM    129 H5''  DT A   4      -2.281 -14.484 -47.730  5.00  0.00           H  
ATOM    130  P    DT A   5      -1.680 -19.196 -46.740  2.00  0.00           P  
ATOM    131  C5'  DT A   5       0.435 -20.614 -46.280  8.00  0.00           C  
ATOM    132  O5'  DT A   5      -0.780 -20.065 -45.790  6.00  0.00           O  
ATOM    133  C4'  DT A   5       1.329 -21.354 -45.240  8.00  0.00           C  
ATOM    134  O4'  DT A   5       1.808 -20.410 -44.340  2.00  0.00           O  
ATOM    135  C3'  DT A   5       0.556 -22.461 -44.510  1.00  0.00           C  
ATOM    136  O3'  DT A   5       1.265 -23.684 -44.520  1.00  0.00           O  
ATOM    137  C2'  DT A   5       0.473 -21.921 -43.080  5.00  0.00           C  
ATOM    138  C1'  DT A   5       1.708 -21.126 -43.040  1.00  0.00           C  
ATOM    139  N1   DT A   5       1.672 -20.128 -41.880  3.00  0.00           N  
ATOM    140  C2   DT A   5       2.688 -20.229 -40.960  3.00  0.00           C  
ATOM    141  O2   DT A   5       3.551 -21.068 -40.860  5.00  0.00           O  
ATOM    142  N3   DT A   5       2.660 -19.184 -40.040  5.00  0.00           N  
ATOM    143  C4   DT A   5       1.852 -18.019 -39.980  5.00  0.00           C  
ATOM    144  O4   DT A   5       2.078 -17.081 -39.210  6.00  0.00           O  
ATOM    145  C5   DT A   5       0.824 -18.022 -40.970  7.00  0.00           C  
ATOM    146  C6   DT A   5       0.729 -19.057 -41.890  4.00  0.00           C  
ATOM    147  C7   DT A   5      -0.155 -16.900 -40.960  8.00  0.00           C  
ATOM    148  OP1  DT A   5      -1.706 -19.891 -48.070  8.00  0.00           O  
ATOM    149  OP2  DT A   5      -2.966 -19.046 -46.070  0.00  0.00           O1-
ATOM    150  H3   DT A   5       3.506 -19.242 -39.410  8.00  0.00           H  
ATOM    151  H6   DT A   5      -0.066 -19.028 -42.600  1.00  0.00           H  
ATOM    152  H1'  DT A   5       2.539 -21.735 -43.020  2.00  0.00           H  
ATOM    153  H2'  DT A   5      -0.328 -21.253 -42.980  5.00  0.00           H  
ATOM    154  H3'  DT A   5      -0.332 -22.664 -45.030  6.00  0.00           H  
ATOM    155  H4'  DT A   5       2.195 -21.702 -45.800  6.00  0.00           H  
ATOM    156  H5'  DT A   5       1.107 -19.873 -46.720  1.00  0.00           H  
ATOM    157  H71  DT A   5      -0.734 -16.692 -41.850  1.00  0.00           H  
ATOM    158  H72  DT A   5      -0.799 -17.087 -40.120  5.00  0.00           H  
ATOM    159  H73  DT A   5       0.375 -15.953 -40.570  5.00  0.00           H  
ATOM    160 H2''  DT A   5       0.478 -22.683 -42.320  1.00  0.00           H  
ATOM    161 H5''  DT A   5       0.290 -21.224 -47.110  9.00  0.00           H  
ATOM    162  P    DA A   6       0.623 -25.207 -44.420  0.00  0.00           P  
ATOM    163  C5'  DA A   6       2.024 -25.903 -42.410  4.00  0.00           C  
ATOM    164  O5'  DA A   6       0.757 -25.623 -42.930  9.00  0.00           O  
ATOM    165  C4'  DA A   6       1.990 -25.747 -40.900  3.00  0.00           C  
ATOM    166  O4'  DA A   6       1.918 -24.337 -40.560  8.00  0.00           O  
ATOM    167  C3'  DA A   6       0.754 -26.445 -40.200  8.00  0.00           C  
ATOM    168  O3'  DA A   6       0.988 -27.160 -39.030  2.00  0.00           O  
ATOM    169  C2'  DA A   6      -0.078 -25.181 -39.930  4.00  0.00           C  
ATOM    170  C1'  DA A   6       1.039 -24.229 -39.480  8.00  0.00           C  
ATOM    171  N1   DA A   6       1.677 -20.249 -36.320  7.00  0.00           N  
ATOM    172  C2   DA A   6       2.414 -21.357 -36.530  7.00  0.00           C  
ATOM    173  N3   DA A   6       2.212 -22.396 -37.380  2.00  0.00           N  
ATOM    174  C4   DA A   6       1.091 -22.142 -38.120  6.00  0.00           C  
ATOM    175  C5   DA A   6       0.307 -21.009 -38.090  1.00  0.00           C  
ATOM    176  C6   DA A   6       0.718 -20.028 -37.150  6.00  0.00           C  
ATOM    177  N6   DA A   6       0.179 -18.784 -36.930  3.00  0.00           N  
ATOM    178  N7   DA A   6      -0.769 -21.131 -39.060  4.00  0.00           N  
ATOM    179  C8   DA A   6      -0.506 -22.221 -39.620  7.00  0.00           C  
ATOM    180  N9   DA A   6       0.531 -22.968 -39.040  4.00  0.00           N  
ATOM    181  OP1  DA A   6       1.543 -26.023 -45.220  3.00  0.00           O  
ATOM    182  OP2  DA A   6      -0.849 -25.179 -44.750  8.00  0.00           O1-
ATOM    183  H2   DA A   6       3.289 -21.517 -35.880  8.00  0.00           H  
ATOM    184  H8   DA A   6      -1.040 -22.621 -40.390  7.00  0.00           H  
ATOM    185  H1'  DA A   6       1.540 -24.650 -38.620  0.00  0.00           H  
ATOM    186  H2'  DA A   6      -0.505 -24.862 -40.860  4.00  0.00           H  
ATOM    187  H3'  DA A   6       0.202 -27.081 -40.930  7.00  0.00           H  
ATOM    188  H4'  DA A   6       2.895 -26.193 -40.620  4.00  0.00           H  
ATOM    189  H5'  DA A   6       2.751 -25.163 -42.730  5.00  0.00           H  
ATOM    190  H61  DA A   6       0.816 -18.185 -36.430  2.00  0.00           H  
ATOM    191  H62  DA A   6      -0.696 -18.543 -37.350  8.00  0.00           H  
ATOM    192 H2''  DA A   6      -0.881 -25.293 -39.110  5.00  0.00           H  
ATOM    193 H5''  DA A   6       2.434 -26.812 -42.680  0.00  0.00           H  
ATOM    194  P    DG A   7       1.220 -28.756 -39.150  2.00  0.00           P  
ATOM    195  C5'  DG A   7       3.276 -28.800 -37.350  4.00  0.00           C  
ATOM    196  O5'  DG A   7       1.963 -29.122 -37.760  8.00  0.00           O  
ATOM    197  C4'  DG A   7       3.285 -28.154 -35.970  0.00  0.00           C  
ATOM    198  O4'  DG A   7       2.753 -26.908 -36.100  9.00  0.00           O  
ATOM    199  C3'  DG A   7       2.385 -28.924 -34.960  1.00  0.00           C  
ATOM    200  O3'  DG A   7       2.921 -29.077 -33.710  2.00  0.00           O  
ATOM    201  C2'  DG A   7       1.170 -27.989 -34.900  6.00  0.00           C  
ATOM    202  C1'  DG A   7       1.982 -26.743 -35.000  8.00  0.00           C  
ATOM    203  N1   DG A   7       0.559 -22.065 -33.450  4.00  0.00           N  
ATOM    204  C2   DG A   7       1.628 -22.785 -33.090  6.00  0.00           C  
ATOM    205  N2   DG A   7       2.365 -22.264 -32.180  3.00  0.00           N  
ATOM    206  N3   DG A   7       1.941 -24.008 -33.510  2.00  0.00           N  
ATOM    207  C4   DG A   7       1.030 -24.382 -34.450  8.00  0.00           C  
ATOM    208  C5   DG A   7       0.013 -23.625 -35.010  7.00  0.00           C  
ATOM    209  C6   DG A   7      -0.328 -22.385 -34.470  3.00  0.00           C  
ATOM    210  O6   DG A   7      -1.142 -21.522 -34.780  1.00  0.00           O  
ATOM    211  N7   DG A   7      -0.544 -24.284 -36.150  9.00  0.00           N  
ATOM    212  C8   DG A   7       0.079 -25.372 -36.210  7.00  0.00           C  
ATOM    213  N9   DG A   7       1.063 -25.553 -35.220  6.00  0.00           N  
ATOM    214  OP1  DG A   7       2.229 -28.968 -40.200  0.00  0.00           O  
ATOM    215  OP2  DG A   7      -0.087 -29.404 -39.210  9.00  0.00           O1-
ATOM    216  H1   DG A   7       0.370 -21.224 -32.950  3.00  0.00           H  
ATOM    217  H8   DG A   7      -0.103 -26.147 -37.040  4.00  0.00           H  
ATOM    218  H1'  DG A   7       2.523 -26.602 -34.060  0.00  0.00           H  
ATOM    219  H2'  DG A   7       0.510 -28.179 -35.760  1.00  0.00           H  
ATOM    220  H21  DG A   7       2.050 -21.493 -31.610  3.00  0.00           H  
ATOM    221  H3'  DG A   7       2.148 -29.928 -35.350  8.00  0.00           H  
ATOM    222  H22  DG A   7       3.190 -22.812 -31.860  3.00  0.00           H  
ATOM    223  H4'  DG A   7       4.340 -28.194 -35.520  1.00  0.00           H  
ATOM    224  H5'  DG A   7       3.699 -28.157 -38.090  2.00  0.00           H  
ATOM    225 H2''  DG A   7       0.610 -28.038 -33.950  9.00  0.00           H  
ATOM    226 H5''  DG A   7       4.002 -29.594 -37.450  8.00  0.00           H  
ATOM    227  P    DG A   8       2.452 -30.227 -32.650  0.00  0.00           P  
ATOM    228  C5'  DG A   8       3.623 -29.188 -30.600  8.00  0.00           C  
ATOM    229  O5'  DG A   8       2.435 -29.470 -31.240  2.00  0.00           O  
ATOM    230  C4'  DG A   8       3.552 -28.072 -29.550  8.00  0.00           C  
ATOM    231  O4'  DG A   8       3.091 -26.820 -30.110  3.00  0.00           O  
ATOM    232  C3'  DG A   8       2.745 -28.346 -28.340  4.00  0.00           C  
ATOM    233  O3'  DG A   8       3.401 -27.702 -27.260  1.00  0.00           O  
ATOM    234  C2'  DG A   8       1.384 -27.709 -28.720  2.00  0.00           C  
ATOM    235  C1'  DG A   8       1.846 -26.464 -29.520  0.00  0.00           C  
ATOM    236  N1   DG A   8      -1.487 -22.760 -30.820  5.00  0.00           N  
ATOM    237  C2   DG A   8      -0.586 -22.820 -29.870  7.00  0.00           C  
ATOM    238  N2   DG A   8      -0.564 -21.928 -28.880  8.00  0.00           N  
ATOM    239  N3   DG A   8       0.381 -23.769 -29.700  4.00  0.00           N  
ATOM    240  C4   DG A   8       0.185 -24.783 -30.530  0.00  0.00           C  
ATOM    241  C5   DG A   8      -0.833 -24.872 -31.500  7.00  0.00           C  
ATOM    242  C6   DG A   8      -1.707 -23.725 -31.740  9.00  0.00           C  
ATOM    243  O6   DG A   8      -2.670 -23.574 -32.460  2.00  0.00           O  
ATOM    244  N7   DG A   8      -0.820 -26.154 -32.040  1.00  0.00           N  
ATOM    245  C8   DG A   8       0.177 -26.774 -31.470  2.00  0.00           C  
ATOM    246  N9   DG A   8       0.758 -26.098 -30.490  4.00  0.00           N  
ATOM    247  OP1  DG A   8       3.501 -31.234 -32.620  8.00  0.00           O  
ATOM    248  OP2  DG A   8       1.072 -30.701 -32.950  8.00  0.00           O1-
ATOM    249  H1   DG A   8      -2.194 -21.993 -30.880  7.00  0.00           H  
ATOM    250  H8   DG A   8       0.427 -27.856 -31.530  4.00  0.00           H  
ATOM    251  H1'  DG A   8       1.975 -25.627 -28.910  5.00  0.00           H  
ATOM    252  H2'  DG A   8       0.748 -28.378 -29.260  1.00  0.00           H  
ATOM    253  H21  DG A   8      -1.311 -21.184 -28.900  3.00  0.00           H  
ATOM    254  H3'  DG A   8       2.696 -29.400 -28.250  1.00  0.00           H  
ATOM    255  H22  DG A   8      -0.001 -22.138 -28.080  0.00  0.00           H  
ATOM    256  H4'  DG A   8       4.686 -27.979 -29.310  7.00  0.00           H  
ATOM    257  H5'  DG A   8       4.320 -28.765 -31.390  1.00  0.00           H  
ATOM    258 H2''  DG A   8       0.877 -27.350 -27.840  6.00  0.00           H  
ATOM    259 H5''  DG A   8       4.067 -30.098 -30.080  5.00  0.00           H  
ATOM    260  P    DG A   9       2.857 -27.870 -25.760  7.00  0.00           P  
ATOM    261  C5'  DG A   9       1.913 -25.366 -25.400  4.00  0.00           C  
ATOM    262  O5'  DG A   9       1.658 -26.765 -25.710  5.00  0.00           O  
ATOM    263  C4'  DG A   9       0.579 -24.533 -25.470  4.00  0.00           C  
ATOM    264  O4'  DG A   9      -0.062 -24.451 -26.780  9.00  0.00           O  
ATOM    265  C3'  DG A   9      -0.490 -24.980 -24.470  2.00  0.00           C  
ATOM    266  O3'  DG A   9      -0.742 -23.943 -23.700  8.00  0.00           O  
ATOM    267  C2'  DG A   9      -1.633 -25.370 -25.390  9.00  0.00           C  
ATOM    268  C1'  DG A   9      -1.489 -24.470 -26.560  3.00  0.00           C  
ATOM    269  N1   DG A   9      -5.621 -23.342 -29.420  2.00  0.00           N  
ATOM    270  C2   DG A   9      -5.015 -22.675 -28.390  0.00  0.00           C  
ATOM    271  N2   DG A   9      -5.485 -21.393 -28.220  1.00  0.00           N  
ATOM    272  N3   DG A   9      -3.987 -23.075 -27.690  3.00  0.00           N  
ATOM    273  C4   DG A   9      -3.423 -24.177 -28.220  0.00  0.00           C  
ATOM    274  C5   DG A   9      -3.875 -24.884 -29.300  7.00  0.00           C  
ATOM    275  C6   DG A   9      -4.964 -24.381 -30.050  2.00  0.00           C  
ATOM    276  O6   DG A   9      -5.446 -24.835 -31.090  2.00  0.00           O  
ATOM    277  N7   DG A   9      -3.007 -25.979 -29.490  1.00  0.00           N  
ATOM    278  C8   DG A   9      -2.074 -25.904 -28.560  3.00  0.00           C  
ATOM    279  N9   DG A   9      -2.276 -24.844 -27.750  3.00  0.00           N  
ATOM    280  OP1  DG A   9       3.974 -27.632 -24.820  7.00  0.00           O  
ATOM    281  OP2  DG A   9       2.037 -29.177 -25.710  3.00  0.00           O1-
ATOM    282  H1   DG A   9      -6.346 -22.934 -29.910  3.00  0.00           H  
ATOM    283  H8   DG A   9      -1.184 -26.565 -28.450  5.00  0.00           H  
ATOM    284  H1'  DG A   9      -1.822 -23.510 -26.240  5.00  0.00           H  
ATOM    285  H2'  DG A   9      -1.567 -26.378 -25.610  4.00  0.00           H  
ATOM    286  H21  DG A   9      -6.236 -21.091 -28.820  6.00  0.00           H  
ATOM    287  H3'  DG A   9      -0.032 -25.854 -24.000  4.00  0.00           H  
ATOM    288  H22  DG A   9      -5.044 -20.709 -27.570  2.00  0.00           H  
ATOM    289  H4'  DG A   9       0.856 -23.473 -25.230  9.00  0.00           H  
ATOM    290  H5'  DG A   9       2.648 -24.893 -26.070  1.00  0.00           H  
ATOM    291 H2''  DG A   9      -2.542 -25.225 -24.830  1.00  0.00           H  
ATOM    292 H5''  DG A   9       2.285 -25.403 -24.430  6.00  0.00           H  
ATOM    293  P    DT A  10      -1.554 -24.052 -22.350  1.00  0.00           P  
ATOM    294  C5'  DT A  10      -3.192 -22.156 -23.140  4.00  0.00           C  
ATOM    295  O5'  DT A  10      -3.012 -23.525 -22.790  3.00  0.00           O  
ATOM    296  C4'  DT A  10      -4.608 -21.718 -23.510  0.00  0.00           C  
ATOM    297  O4'  DT A  10      -4.992 -22.310 -24.740  6.00  0.00           O  
ATOM    298  C3'  DT A  10      -5.509 -22.250 -22.390  5.00  0.00           C  
ATOM    299  O3'  DT A  10      -6.528 -21.354 -22.120  0.00  0.00           O  
ATOM    300  C2'  DT A  10      -6.047 -23.566 -23.090  1.00  0.00           C  
ATOM    301  C1'  DT A  10      -6.159 -23.059 -24.540  2.00  0.00           C  
ATOM    302  N1   DT A  10      -6.244 -24.089 -25.550  6.00  0.00           N  
ATOM    303  C2   DT A  10      -7.148 -23.905 -26.580  2.00  0.00           C  
ATOM    304  O2   DT A  10      -7.801 -22.940 -26.770  9.00  0.00           O  
ATOM    305  N3   DT A  10      -7.416 -24.962 -27.410  4.00  0.00           N  
ATOM    306  C4   DT A  10      -6.752 -26.178 -27.460  7.00  0.00           C  
ATOM    307  O4   DT A  10      -6.989 -27.028 -28.330  8.00  0.00           O  
ATOM    308  C5   DT A  10      -5.667 -26.219 -26.460  1.00  0.00           C  
ATOM    309  C6   DT A  10      -5.450 -25.241 -25.500  5.00  0.00           C  
ATOM    310  C7   DT A  10      -4.783 -27.410 -26.440  6.00  0.00           C  
ATOM    311  OP1  DT A  10      -0.894 -22.952 -21.490  3.00  0.00           O  
ATOM    312  OP2  DT A  10      -1.708 -25.442 -21.770  9.00  0.00           O1-
ATOM    313  H3   DT A  10      -8.006 -24.618 -28.180  6.00  0.00           H  
ATOM    314  H6   DT A  10      -4.649 -25.342 -24.740  8.00  0.00           H  
ATOM    315  H1'  DT A  10      -7.029 -22.369 -24.490  3.00  0.00           H  
ATOM    316  H2'  DT A  10      -5.385 -24.408 -22.980  6.00  0.00           H  
ATOM    317  H3'  DT A  10      -5.031 -22.613 -21.430  1.00  0.00           H  
ATOM    318  H4'  DT A  10      -4.636 -20.624 -23.600  3.00  0.00           H  
ATOM    319  H5'  DT A  10      -2.524 -22.011 -24.010  4.00  0.00           H  
ATOM    320  H71  DT A  10      -5.160 -28.196 -25.810  9.00  0.00           H  
ATOM    321  H72  DT A  10      -4.516 -27.728 -27.460  0.00  0.00           H  
ATOM    322  H73  DT A  10      -3.839 -27.047 -26.030  3.00  0.00           H  
ATOM    323 H2''  DT A  10      -7.039 -23.942 -22.690  3.00  0.00           H  
ATOM    324 H5''  DT A  10      -2.825 -21.538 -22.380  2.00  0.00           H  
ATOM    325  P    DT A  11      -7.794 -21.775 -21.130  6.00  0.00           P  
ATOM    326  C5'  DT A  11      -9.241 -21.306 -23.210  3.00  0.00           C  
ATOM    327  O5'  DT A  11      -8.831 -22.262 -22.250  9.00  0.00           O  
ATOM    328  C4'  DT A  11     -10.216 -21.916 -24.210  4.00  0.00           C  
ATOM    329  O4'  DT A  11      -9.594 -23.116 -24.740  2.00  0.00           O  
ATOM    330  C3'  DT A  11     -11.551 -22.286 -23.610  9.00  0.00           C  
ATOM    331  O3'  DT A  11     -12.582 -21.885 -24.540  4.00  0.00           O  
ATOM    332  C2'  DT A  11     -11.427 -23.741 -23.570  9.00  0.00           C  
ATOM    333  C1'  DT A  11     -10.585 -24.130 -24.790  6.00  0.00           C  
ATOM    334  N1   DT A  11     -10.023 -25.497 -24.660  0.00  0.00           N  
ATOM    335  C2   DT A  11     -10.132 -26.350 -25.740  6.00  0.00           C  
ATOM    336  O2   DT A  11     -10.602 -26.053 -26.840  0.00  0.00           O  
ATOM    337  N3   DT A  11      -9.507 -27.581 -25.620  3.00  0.00           N  
ATOM    338  C4   DT A  11      -8.722 -28.000 -24.620  3.00  0.00           C  
ATOM    339  O4   DT A  11      -8.291 -29.132 -24.650  3.00  0.00           O  
ATOM    340  C5   DT A  11      -8.527 -26.976 -23.560  0.00  0.00           C  
ATOM    341  C6   DT A  11      -9.199 -25.821 -23.630  4.00  0.00           C  
ATOM    342  C7   DT A  11      -7.631 -27.249 -22.410  1.00  0.00           C  
ATOM    343  OP1  DT A  11      -8.357 -20.659 -20.390  0.00  0.00           O  
ATOM    344  OP2  DT A  11      -7.408 -22.950 -20.350  3.00  0.00           O1-
ATOM    345  H3   DT A  11      -9.365 -28.043 -26.480  9.00  0.00           H  
ATOM    346  H6   DT A  11      -9.095 -25.055 -22.750  7.00  0.00           H  
ATOM    347  H1'  DT A  11     -11.123 -23.967 -25.750  4.00  0.00           H  
ATOM    348  H2'  DT A  11     -10.948 -23.938 -22.590  6.00  0.00           H  
ATOM    349  H3'  DT A  11     -11.578 -21.819 -22.670  0.00  0.00           H  
ATOM    350  H4'  DT A  11     -10.366 -21.166 -25.050  0.00  0.00           H  
ATOM    351  H5'  DT A  11      -8.364 -20.952 -23.730  9.00  0.00           H  
ATOM    352  H71  DT A  11      -7.620 -28.309 -22.160  7.00  0.00           H  
ATOM    353  H72  DT A  11      -6.664 -26.927 -22.660  5.00  0.00           H  
ATOM    354  H73  DT A  11      -8.041 -26.725 -21.490  9.00  0.00           H  
ATOM    355 H2''  DT A  11     -12.401 -24.250 -23.560  7.00  0.00           H  
ATOM    356 H5''  DT A  11      -9.730 -20.465 -22.770  9.00  0.00           H  
ATOM    357  P    DA A  12     -13.944 -21.268 -23.940  0.00  0.00           P  
ATOM    358  C5'  DA A  12     -15.213 -22.304 -21.910  4.00  0.00           C  
ATOM    359  O5'  DA A  12     -14.772 -22.429 -23.220  3.00  0.00           O  
ATOM    360  C4'  DA A  12     -14.232 -22.835 -20.860  9.00  0.00           C  
ATOM    361  O4'  DA A  12     -14.780 -22.615 -19.590  9.00  0.00           O  
ATOM    362  C3'  DA A  12     -14.011 -24.351 -21.030  7.00  0.00           C  
ATOM    363  O3'  DA A  12     -12.738 -24.610 -20.510  1.00  0.00           O  
ATOM    364  C2'  DA A  12     -15.069 -24.896 -20.100  4.00  0.00           C  
ATOM    365  C1'  DA A  12     -15.013 -23.861 -19.000  1.00  0.00           C  
ATOM    366  N1   DA A  12     -17.246 -25.346 -14.610  0.00  0.00           N  
ATOM    367  C2   DA A  12     -15.975 -25.082 -14.980  5.00  0.00           C  
ATOM    368  N3   DA A  12     -15.458 -24.630 -16.120  6.00  0.00           N  
ATOM    369  C4   DA A  12     -16.471 -24.363 -16.960  7.00  0.00           C  
ATOM    370  C5   DA A  12     -17.833 -24.504 -16.800  7.00  0.00           C  
ATOM    371  C6   DA A  12     -18.165 -25.068 -15.510  1.00  0.00           C  
ATOM    372  N6   DA A  12     -19.432 -25.166 -15.020  7.00  0.00           N  
ATOM    373  N7   DA A  12     -18.557 -24.092 -17.880  5.00  0.00           N  
ATOM    374  C8   DA A  12     -17.610 -23.877 -18.770  7.00  0.00           C  
ATOM    375  N9   DA A  12     -16.327 -24.023 -18.310  9.00  0.00           N  
ATOM    376  OP1  DA A  12     -14.556 -20.882 -25.250  9.00  0.00           O  
ATOM    377  OP2  DA A  12     -13.480 -20.267 -22.920  8.00  0.00           O1-
ATOM    378  H2   DA A  12     -15.229 -25.347 -14.200  7.00  0.00           H  
ATOM    379  H8   DA A  12     -17.853 -23.486 -19.730  9.00  0.00           H  
ATOM    380  H1'  DA A  12     -14.259 -24.176 -18.260  8.00  0.00           H  
ATOM    381  H2'  DA A  12     -16.017 -24.879 -20.610  4.00  0.00           H  
ATOM    382  H3'  DA A  12     -13.995 -24.732 -22.060  8.00  0.00           H  
ATOM    383  H4'  DA A  12     -13.281 -22.337 -20.870  7.00  0.00           H  
ATOM    384  H5'  DA A  12     -16.086 -22.979 -21.930  7.00  0.00           H  
ATOM    385  H61  DA A  12     -19.636 -25.814 -14.230  7.00  0.00           H  
ATOM    386  H62  DA A  12     -20.041 -24.718 -15.640  9.00  0.00           H  
ATOM    387 H2''  DA A  12     -14.818 -25.899 -19.790  1.00  0.00           H  
ATOM    388 H5''  DA A  12     -15.419 -21.288 -21.770  2.00  0.00           H  
ATOM    389  P    DG A  13     -11.960 -25.963 -20.710  9.00  0.00           P  
ATOM    390  C5'  DG A  13     -12.431 -26.557 -18.130  1.00  0.00           C  
ATOM    391  O5'  DG A  13     -12.492 -26.901 -19.540  1.00  0.00           O  
ATOM    392  C4'  DG A  13     -13.348 -27.406 -17.250  5.00  0.00           C  
ATOM    393  O4'  DG A  13     -14.764 -27.391 -17.700  3.00  0.00           O  
ATOM    394  C3'  DG A  13     -12.904 -28.868 -17.170  4.00  0.00           C  
ATOM    395  O3'  DG A  13     -13.167 -29.430 -15.890  9.00  0.00           O  
ATOM    396  C2'  DG A  13     -13.829 -29.497 -18.220  7.00  0.00           C  
ATOM    397  C1'  DG A  13     -15.153 -28.661 -18.150  1.00  0.00           C  
ATOM    398  N1   DG A  13     -19.654 -26.938 -19.770  2.00  0.00           N  
ATOM    399  C2   DG A  13     -19.234 -27.162 -18.540  1.00  0.00           C  
ATOM    400  N2   DG A  13     -20.264 -27.239 -17.740  6.00  0.00           N  
ATOM    401  N3   DG A  13     -18.097 -27.740 -18.220  8.00  0.00           N  
ATOM    402  C4   DG A  13     -17.306 -28.051 -19.330  9.00  0.00           C  
ATOM    403  C5   DG A  13     -17.632 -27.842 -20.610  5.00  0.00           C  
ATOM    404  C6   DG A  13     -18.957 -27.296 -20.880  8.00  0.00           C  
ATOM    405  O6   DG A  13     -19.444 -27.150 -22.000  2.00  0.00           O  
ATOM    406  N7   DG A  13     -16.648 -28.262 -21.510  6.00  0.00           N  
ATOM    407  C8   DG A  13     -15.693 -28.654 -20.640  9.00  0.00           C  
ATOM    408  N9   DG A  13     -16.043 -28.591 -19.370  2.00  0.00           N  
ATOM    409  OP1  DG A  13     -10.559 -25.679 -20.380  6.00  0.00           O  
ATOM    410  OP2  DG A  13     -12.285 -26.520 -22.070  7.00  0.00           O1-
ATOM    411  H1   DG A  13     -20.586 -26.597 -19.890  6.00  0.00           H  
ATOM    412  H8   DG A  13     -14.675 -29.029 -20.880  4.00  0.00           H  
ATOM    413  H1'  DG A  13     -15.695 -29.145 -17.330  5.00  0.00           H  
ATOM    414  H2'  DG A  13     -13.352 -29.558 -19.190  4.00  0.00           H  
ATOM    415  H21  DG A  13     -21.178 -26.946 -18.070  1.00  0.00           H  
ATOM    416  H3'  DG A  13     -11.808 -29.003 -17.490  1.00  0.00           H  
ATOM    417  H22  DG A  13     -20.121 -27.574 -16.830  2.00  0.00           H  
ATOM    418  H4'  DG A  13     -13.414 -27.087 -16.270  1.00  0.00           H  
ATOM    419  H5'  DG A  13     -12.836 -25.652 -17.900  9.00  0.00           H  
ATOM    420 H2''  DG A  13     -14.101 -30.583 -17.940  5.00  0.00           H  
ATOM    421 H5''  DG A  13     -11.437 -26.648 -17.740  6.00  0.00           H  
ATOM    422  P    DG A  14     -12.201 -30.316 -15.050  7.00  0.00           P  
ATOM    423  C5'  DG A  14     -12.964 -30.807 -12.620  5.00  0.00           C  
ATOM    424  O5'  DG A  14     -12.757 -29.876 -13.670  9.00  0.00           O  
ATOM    425  C4'  DG A  14     -14.410 -30.731 -12.050  4.00  0.00           C  
ATOM    426  O4'  DG A  14     -15.278 -31.074 -13.190  1.00  0.00           O  
ATOM    427  C3'  DG A  14     -14.790 -29.333 -11.530  9.00  0.00           C  
ATOM    428  O3'  DG A  14     -14.954 -29.317 -10.100  9.00  0.00           O  
ATOM    429  C2'  DG A  14     -16.032 -29.036 -12.280  2.00  0.00           C  
ATOM    430  C1'  DG A  14     -15.761 -29.853 -13.580  0.00  0.00           C  
ATOM    431  N1   DG A  14     -17.904 -31.523 -17.880  9.00  0.00           N  
ATOM    432  C2   DG A  14     -16.746 -31.855 -17.340  7.00  0.00           C  
ATOM    433  N2   DG A  14     -16.070 -32.757 -18.020  6.00  0.00           N  
ATOM    434  N3   DG A  14     -16.335 -31.427 -16.160  1.00  0.00           N  
ATOM    435  C4   DG A  14     -17.209 -30.557 -15.550  8.00  0.00           C  
ATOM    436  C5   DG A  14     -18.482 -30.259 -15.970  9.00  0.00           C  
ATOM    437  C6   DG A  14     -18.869 -30.746 -17.250  5.00  0.00           C  
ATOM    438  O6   DG A  14     -20.012 -30.618 -17.800  7.00  0.00           O  
ATOM    439  N7   DG A  14     -19.089 -29.393 -15.060  9.00  0.00           N  
ATOM    440  C8   DG A  14     -18.178 -29.183 -14.140  5.00  0.00           C  
ATOM    441  N9   DG A  14     -16.998 -29.859 -14.380  8.00  0.00           N  
ATOM    442  OP1  DG A  14     -10.788 -29.823 -15.170  0.00  0.00           O  
ATOM    443  OP2  DG A  14     -12.597 -31.663 -15.460  7.00  0.00           O1-
ATOM    444  H1   DG A  14     -18.155 -31.865 -18.760  7.00  0.00           H  
ATOM    445  H8   DG A  14     -18.355 -28.582 -13.280  8.00  0.00           H  
ATOM    446  H1'  DG A  14     -15.044 -29.257 -14.040  8.00  0.00           H  
ATOM    447  H2'  DG A  14     -16.829 -29.494 -11.760  9.00  0.00           H  
ATOM    448  H21  DG A  14     -16.293 -33.093 -18.990  2.00  0.00           H  
ATOM    449  H3'  DG A  14     -14.040 -28.631 -11.830  6.00  0.00           H  
ATOM    450  H22  DG A  14     -15.241 -33.134 -17.500  9.00  0.00           H  
ATOM    451  H4'  DG A  14     -14.526 -31.532 -11.350  0.00  0.00           H  
ATOM    452  H5'  DG A  14     -12.182 -30.710 -11.840  7.00  0.00           H  
ATOM    453 H2''  DG A  14     -16.131 -28.019 -12.410  0.00  0.00           H  
ATOM    454 H5''  DG A  14     -12.880 -31.818 -12.930  2.00  0.00           H  
ATOM    455  P    DG A  15     -13.957 -29.908  -9.120  0.00  0.00           P  
ATOM    456  C5'  DG A  15     -15.180 -32.014  -8.210  8.00  0.00           C  
ATOM    457  O5'  DG A  15     -14.119 -31.476  -8.930  8.00  0.00           O  
ATOM    458  C4'  DG A  15     -16.608 -31.531  -8.630  9.00  0.00           C  
ATOM    459  O4'  DG A  15     -16.784 -31.444 -10.070  2.00  0.00           O  
ATOM    460  C3'  DG A  15     -17.565 -32.682  -8.100  3.00  0.00           C  
ATOM    461  O3'  DG A  15     -18.744 -32.082  -7.580  8.00  0.00           O  
ATOM    462  C2'  DG A  15     -17.885 -33.349  -9.440  3.00  0.00           C  
ATOM    463  C1'  DG A  15     -17.902 -32.198 -10.490  7.00  0.00           C  
ATOM    464  N1   DG A  15     -20.726 -32.402 -14.660  2.00  0.00           N  
ATOM    465  C2   DG A  15     -20.760 -31.543 -13.600  7.00  0.00           C  
ATOM    466  N2   DG A  15     -21.831 -30.852 -13.420  5.00  0.00           N  
ATOM    467  N3   DG A  15     -19.863 -31.504 -12.600  5.00  0.00           N  
ATOM    468  C4   DG A  15     -18.898 -32.464 -12.750  0.00  0.00           C  
ATOM    469  C5   DG A  15     -18.711 -33.385 -13.770  0.00  0.00           C  
ATOM    470  C6   DG A  15     -19.702 -33.325 -14.900  2.00  0.00           C  
ATOM    471  O6   DG A  15     -19.621 -33.976 -15.940  8.00  0.00           O  
ATOM    472  N7   DG A  15     -17.539 -34.126 -13.560  0.00  0.00           N  
ATOM    473  C8   DG A  15     -17.173 -33.794 -12.390  2.00  0.00           C  
ATOM    474  N9   DG A  15     -17.891 -32.750 -11.850  0.00  0.00           N  
ATOM    475  OP1  DG A  15     -14.259 -29.316  -7.760  4.00  0.00           O  
ATOM    476  OP2  DG A  15     -12.635 -29.562  -9.720  8.00  0.00           O1-
ATOM    477  H1   DG A  15     -21.502 -32.521 -15.290  0.00  0.00           H  
ATOM    478  H8   DG A  15     -16.309 -34.167 -11.910  7.00  0.00           H  
ATOM    479  H1'  DG A  15     -18.791 -31.618 -10.260  7.00  0.00           H  
ATOM    480  H2'  DG A  15     -17.101 -34.078  -9.700  9.00  0.00           H  
ATOM    481  H21  DG A  15     -22.421 -30.683 -14.120  2.00  0.00           H  
ATOM    482  H3'  DG A  15     -16.964 -33.385  -7.400  7.00  0.00           H  
ATOM    483  H22  DG A  15     -22.009 -30.267 -12.620  7.00  0.00           H  
ATOM    484  H4'  DG A  15     -16.890 -30.643  -8.130  5.00  0.00           H  
ATOM    485  H5'  DG A  15     -15.033 -31.662  -7.170  6.00  0.00           H  
ATOM    486 H2''  DG A  15     -18.846 -33.795  -9.510  4.00  0.00           H  
ATOM    487 H5''  DG A  15     -15.195 -33.099  -8.210  3.00  0.00           H  
ATOM    488  P    DT A  16     -18.914 -31.563  -6.030  0.00  0.00           P  
ATOM    489  C5'  DT A  16     -19.470 -29.170  -6.950  9.00  0.00           C  
ATOM    490  O5'  DT A  16     -19.986 -30.341  -6.280  4.00  0.00           O  
ATOM    491  C4'  DT A  16     -20.709 -28.697  -7.690  9.00  0.00           C  
ATOM    492  O4'  DT A  16     -20.522 -27.427  -8.220  4.00  0.00           O  
ATOM    493  C3'  DT A  16     -20.934 -29.534  -8.990  5.00  0.00           C  
ATOM    494  O3'  DT A  16     -22.278 -29.429  -9.390  9.00  0.00           O  
ATOM    495  C2'  DT A  16     -19.921 -28.791  -9.900  1.00  0.00           C  
ATOM    496  C1'  DT A  16     -20.024 -27.346  -9.570  9.00  0.00           C  
ATOM    497  N1   DT A  16     -18.708 -26.608  -9.920  3.00  0.00           N  
ATOM    498  C2   DT A  16     -18.572 -26.412 -11.270  5.00  0.00           C  
ATOM    499  O2   DT A  16     -19.410 -26.505 -12.110  8.00  0.00           O  
ATOM    500  N3   DT A  16     -17.414 -25.790 -11.700  9.00  0.00           N  
ATOM    501  C4   DT A  16     -16.279 -25.590 -10.980  5.00  0.00           C  
ATOM    502  O4   DT A  16     -15.293 -25.077 -11.460  1.00  0.00           O  
ATOM    503  C5   DT A  16     -16.395 -25.919  -9.540  7.00  0.00           C  
ATOM    504  C6   DT A  16     -17.551 -26.498  -9.090  0.00  0.00           C  
ATOM    505  C7   DT A  16     -15.285 -25.771  -8.580  1.00  0.00           C  
ATOM    506  OP1  DT A  16     -17.694 -30.901  -5.610  4.00  0.00           O  
ATOM    507  OP2  DT A  16     -19.616 -32.615  -5.260  9.00  0.00           O1-
ATOM    508  H3   DT A  16     -17.447 -25.553 -12.700  1.00  0.00           H  
ATOM    509  H6   DT A  16     -17.583 -26.729  -8.040  5.00  0.00           H  
ATOM    510  H1'  DT A  16     -20.829 -26.984 -10.200  8.00  0.00           H  
ATOM    511  H2'  DT A  16     -18.950 -29.217  -9.780  9.00  0.00           H  
ATOM    512  H3'  DT A  16     -20.669 -30.602  -8.820  8.00  0.00           H  
ATOM    513  H4'  DT A  16     -21.524 -28.738  -6.970  3.00  0.00           H  
ATOM    514  H5'  DT A  16     -18.596 -29.309  -7.550  0.00  0.00           H  
ATOM    515  H71  DT A  16     -14.527 -26.517  -8.740  3.00  0.00           H  
ATOM    516  H72  DT A  16     -14.730 -24.880  -8.740  4.00  0.00           H  
ATOM    517  H73  DT A  16     -15.485 -25.802  -7.510  3.00  0.00           H  
ATOM    518 H2''  DT A  16     -20.103 -28.972 -10.960  6.00  0.00           H  
ATOM    519 H5''  DT A  16     -19.192 -28.448  -6.110  5.00  0.00           H  
ATOM    520  P    DT A  17     -23.412 -30.461  -8.880  3.00  0.00           P  
ATOM    521  C5'  DT A  17     -22.593 -32.416 -10.400  0.00  0.00           C  
ATOM    522  O5'  DT A  17     -23.651 -31.540 -10.090  6.00  0.00           O  
ATOM    523  C4'  DT A  17     -22.946 -33.446 -11.460  7.00  0.00           C  
ATOM    524  O4'  DT A  17     -21.779 -34.075 -11.920  6.00  0.00           O  
ATOM    525  C3'  DT A  17     -23.889 -34.588 -11.020  0.00  0.00           C  
ATOM    526  O3'  DT A  17     -24.961 -34.717 -11.930  0.00  0.00           O  
ATOM    527  C2'  DT A  17     -23.002 -35.818 -10.990  1.00  0.00           C  
ATOM    528  C1'  DT A  17     -22.131 -35.377 -12.210  0.00  0.00           C  
ATOM    529  N1   DT A  17     -20.938 -36.200 -12.400  7.00  0.00           N  
ATOM    530  C2   DT A  17     -20.896 -37.004 -13.580  4.00  0.00           C  
ATOM    531  O2   DT A  17     -21.878 -37.206 -14.290  7.00  0.00           O  
ATOM    532  N3   DT A  17     -19.693 -37.606 -13.850  0.00  0.00           N  
ATOM    533  C4   DT A  17     -18.568 -37.553 -13.110  5.00  0.00           C  
ATOM    534  O4   DT A  17     -17.645 -38.217 -13.530  9.00  0.00           O  
ATOM    535  C5   DT A  17     -18.704 -36.830 -11.860  1.00  0.00           C  
ATOM    536  C6   DT A  17     -19.818 -36.120 -11.600  9.00  0.00           C  
ATOM    537  C7   DT A  17     -17.448 -36.693 -10.870  7.00  0.00           C  
ATOM    538  OP1  DT A  17     -24.732 -29.826  -8.860  6.00  0.00           O  
ATOM    539  OP2  DT A  17     -22.974 -31.215  -7.780  5.00  0.00           O1-
ATOM    540  H3   DT A  17     -19.722 -37.942 -14.830  1.00  0.00           H  
ATOM    541  H6   DT A  17     -19.867 -35.508 -10.670  2.00  0.00           H  
ATOM    542  H1'  DT A  17     -22.848 -35.410 -13.090  3.00  0.00           H  
ATOM    543  H2'  DT A  17     -22.416 -35.839 -10.070  7.00  0.00           H  
ATOM    544  H3'  DT A  17     -24.207 -34.445 -10.030  5.00  0.00           H  
ATOM    545  H4'  DT A  17     -23.407 -32.842 -12.220  5.00  0.00           H  
ATOM    546  H5'  DT A  17     -22.349 -33.058  -9.560  4.00  0.00           H  
ATOM    547  H71  DT A  17     -16.616 -36.371 -11.490  6.00  0.00           H  
ATOM    548  H72  DT A  17     -17.326 -37.710 -10.510  7.00  0.00           H  
ATOM    549  H73  DT A  17     -17.618 -36.035 -10.080  8.00  0.00           H  
ATOM    550 H2''  DT A  17     -23.605 -36.774 -11.050  2.00  0.00           H  
ATOM    551 H5''  DT A  17     -21.595 -32.006 -10.610  4.00  0.00           H  
ATOM    552  P    DA A  18     -26.418 -35.120 -11.530  5.00  0.00           P  
ATOM    553  C5'  DA A  18     -27.423 -34.434 -13.860  0.00  0.00           C  
ATOM    554  O5'  DA A  18     -27.138 -35.429 -12.900  7.00  0.00           O  
ATOM    555  C4'  DA A  18     -27.654 -34.830 -15.250  5.00  0.00           C  
ATOM    556  O4'  DA A  18     -26.479 -35.136 -15.960  7.00  0.00           O  
ATOM    557  C3'  DA A  18     -28.559 -36.057 -15.430  3.00  0.00           C  
ATOM    558  O3'  DA A  18     -29.771 -36.003 -16.210  8.00  0.00           O  
ATOM    559  C2'  DA A  18     -27.667 -36.994 -16.150  9.00  0.00           C  
ATOM    560  C1'  DA A  18     -26.757 -36.122 -16.940  0.00  0.00           C  
ATOM    561  N1   DA A  18     -24.898 -39.546 -20.080  2.00  0.00           N  
ATOM    562  C2   DA A  18     -25.989 -38.842 -20.180  2.00  0.00           C  
ATOM    563  N3   DA A  18     -26.406 -37.916 -19.330  4.00  0.00           N  
ATOM    564  C4   DA A  18     -25.459 -37.724 -18.370  3.00  0.00           C  
ATOM    565  C5   DA A  18     -24.246 -38.398 -18.200  0.00  0.00           C  
ATOM    566  C6   DA A  18     -23.977 -39.397 -19.150  2.00  0.00           C  
ATOM    567  N6   DA A  18     -22.926 -40.220 -19.270  3.00  0.00           N  
ATOM    568  N7   DA A  18     -23.660 -38.001 -16.990  5.00  0.00           N  
ATOM    569  C8   DA A  18     -24.420 -37.051 -16.510  4.00  0.00           C  
ATOM    570  N9   DA A  18     -25.526 -36.898 -17.270  1.00  0.00           N  
ATOM    571  OP1  DA A  18     -27.108 -33.942 -10.980  3.00  0.00           O  
ATOM    572  OP2  DA A  18     -26.484 -36.383 -10.710  3.00  0.00           O1-
ATOM    573  H2   DA A  18     -26.615 -39.134 -21.040  7.00  0.00           H  
ATOM    574  H8   DA A  18     -24.180 -36.516 -15.650  9.00  0.00           H  
ATOM    575  H1'  DA A  18     -27.218 -35.718 -17.840  1.00  0.00           H  
ATOM    576  H2'  DA A  18     -27.101 -37.613 -15.460  2.00  0.00           H  
ATOM    577  H3'  DA A  18     -28.843 -36.334 -14.420  3.00  0.00           H  
ATOM    578  H4'  DA A  18     -28.050 -34.009 -15.850  5.00  0.00           H  
ATOM    579  H5'  DA A  18     -26.560 -33.708 -13.890  9.00  0.00           H  
ATOM    580  H61  DA A  18     -22.813 -40.947 -19.990  4.00  0.00           H  
ATOM    581  H62  DA A  18     -22.108 -39.951 -18.730  3.00  0.00           H  
ATOM    582 H2''  DA A  18     -28.136 -37.740 -16.810  5.00  0.00           H  
ATOM    583 H5''  DA A  18     -28.322 -33.979 -13.530  6.00  0.00           H  
ATOM    584  P    DG A  19     -31.149 -35.561 -15.510  8.00  0.00           P  
ATOM    585  C5'  DG A  19     -31.167 -32.992 -15.940  8.00  0.00           C  
ATOM    586  O5'  DG A  19     -30.949 -34.093 -15.070  7.00  0.00           O  
ATOM    587  C4'  DG A  19     -30.798 -31.671 -15.240  3.00  0.00           C  
ATOM    588  O4'  DG A  19     -29.442 -31.786 -14.940  2.00  0.00           O  
ATOM    589  C3'  DG A  19     -31.036 -30.460 -16.100  9.00  0.00           C  
ATOM    590  O3'  DG A  19     -31.626 -29.442 -15.250  9.00  0.00           O  
ATOM    591  C2'  DG A  19     -29.595 -30.137 -16.670  8.00  0.00           C  
ATOM    592  C1'  DG A  19     -28.865 -30.529 -15.360  2.00  0.00           C  
ATOM    593  N1   DG A  19     -24.797 -32.891 -17.420  1.00  0.00           N  
ATOM    594  C2   DG A  19     -25.966 -32.583 -17.980  4.00  0.00           C  
ATOM    595  N2   DG A  19     -26.204 -33.151 -19.090  3.00  0.00           N  
ATOM    596  N3   DG A  19     -26.944 -31.908 -17.470  7.00  0.00           N  
ATOM    597  C4   DG A  19     -26.579 -31.381 -16.300  9.00  0.00           C  
ATOM    598  C5   DG A  19     -25.376 -31.415 -15.650  8.00  0.00           C  
ATOM    599  C6   DG A  19     -24.341 -32.218 -16.310  5.00  0.00           C  
ATOM    600  O6   DG A  19     -23.179 -32.447 -15.950  2.00  0.00           O  
ATOM    601  N7   DG A  19     -25.369 -30.619 -14.520  3.00  0.00           N  
ATOM    602  C8   DG A  19     -26.604 -30.159 -14.420  8.00  0.00           C  
ATOM    603  N9   DG A  19     -27.386 -30.655 -15.400  0.00  0.00           N  
ATOM    604  OP1  DG A  19     -31.347 -36.539 -14.340  7.00  0.00           O  
ATOM    605  OP2  DG A  19     -32.151 -35.635 -16.610  3.00  0.00           O1-
ATOM    606  H1   DG A  19     -24.147 -33.544 -17.910  1.00  0.00           H  
ATOM    607  H8   DG A  19     -26.881 -29.511 -13.640  7.00  0.00           H  
ATOM    608  H1'  DG A  19     -29.071 -29.683 -14.680  3.00  0.00           H  
ATOM    609  H2'  DG A  19     -29.378 -30.778 -17.560  0.00  0.00           H  
ATOM    610  H21  DG A  19     -25.592 -33.850 -19.500  2.00  0.00           H  
ATOM    611  H3'  DG A  19     -31.689 -30.740 -16.840  6.00  0.00           H  
ATOM    612  H22  DG A  19     -27.115 -33.000 -19.490  8.00  0.00           H  
ATOM    613  H4'  DG A  19     -31.251 -31.478 -14.270  5.00  0.00           H  
ATOM    614  H5'  DG A  19     -32.260 -32.970 -16.200  3.00  0.00           H  
ATOM    615 H2''  DG A  19     -29.361 -29.110 -16.980  0.00  0.00           H  
ATOM    616 H5''  DG A  19     -30.592 -33.062 -16.920  9.00  0.00           H  
ATOM    617  P    DG A  20     -32.008 -28.025 -15.860  6.00  0.00           P  
ATOM    618  C5'  DG A  20     -29.943 -26.919 -14.610  7.00  0.00           C  
ATOM    619  O5'  DG A  20     -30.573 -27.352 -15.820  1.00  0.00           O  
ATOM    620  C4'  DG A  20     -28.550 -26.443 -14.870  2.00  0.00           C  
ATOM    621  O4'  DG A  20     -27.655 -27.391 -15.470  0.00  0.00           O  
ATOM    622  C3'  DG A  20     -28.596 -25.468 -16.070  9.00  0.00           C  
ATOM    623  O3'  DG A  20     -29.056 -24.188 -15.730  7.00  0.00           O  
ATOM    624  C2'  DG A  20     -27.196 -25.345 -16.500  2.00  0.00           C  
ATOM    625  C1'  DG A  20     -26.629 -26.688 -16.080  0.00  0.00           C  
ATOM    626  N1   DG A  20     -22.421 -29.339 -17.370  8.00  0.00           N  
ATOM    627  C2   DG A  20     -22.638 -28.463 -16.390  8.00  0.00           C  
ATOM    628  N2   DG A  20     -21.839 -28.522 -15.420  3.00  0.00           N  
ATOM    629  N3   DG A  20     -23.713 -27.693 -16.170  4.00  0.00           N  
ATOM    630  C4   DG A  20     -24.663 -27.908 -17.100  5.00  0.00           C  
ATOM    631  C5   DG A  20     -24.548 -28.775 -18.230  8.00  0.00           C  
ATOM    632  C6   DG A  20     -23.311 -29.542 -18.380  4.00  0.00           C  
ATOM    633  O6   DG A  20     -22.918 -30.316 -19.250  7.00  0.00           O  
ATOM    634  N7   DG A  20     -25.762 -28.761 -18.960  7.00  0.00           N  
ATOM    635  C8   DG A  20     -26.533 -27.883 -18.300  2.00  0.00           C  
ATOM    636  N9   DG A  20     -25.932 -27.375 -17.140  2.00  0.00           N  
ATOM    637  OP1  DG A  20     -32.903 -27.294 -14.950  6.00  0.00           O  
ATOM    638  OP2  DG A  20     -32.442 -28.242 -17.260  6.00  0.00           O1-
ATOM    639  H1   DG A  20     -21.561 -29.843 -17.390  8.00  0.00           H  
ATOM    640  H8   DG A  20     -27.590 -27.633 -18.630  6.00  0.00           H  
ATOM    641  H1'  DG A  20     -25.892 -26.719 -15.180  0.00  0.00           H  
ATOM    642  H2'  DG A  20     -27.078 -25.164 -17.550  0.00  0.00           H  
ATOM    643  H21  DG A  20     -21.059 -29.200 -15.380  9.00  0.00           H  
ATOM    644  H3'  DG A  20     -29.136 -26.021 -16.890  0.00  0.00           H  
ATOM    645  H22  DG A  20     -21.799 -27.755 -14.740  1.00  0.00           H  
ATOM    646  H4'  DG A  20     -28.039 -26.209 -13.960  9.00  0.00           H  
ATOM    647  H5'  DG A  20     -29.899 -27.660 -13.830  6.00  0.00           H  
ATOM    648 H2''  DG A  20     -26.791 -24.656 -15.850  4.00  0.00           H  
ATOM    649 H5''  DG A  20     -30.562 -26.021 -14.260  3.00  0.00           H  
ATOM    650  P    DG A  21     -30.452 -23.643 -16.300  2.00  0.00           P  
ATOM    651  C5'  DG A  21     -29.556 -21.499 -17.510  9.00  0.00           C  
ATOM    652  O5'  DG A  21     -30.076 -22.827 -17.660  8.00  0.00           O  
ATOM    653  C4'  DG A  21     -28.532 -21.175 -18.610  4.00  0.00           C  
ATOM    654  O4'  DG A  21     -27.203 -21.583 -18.320  2.00  0.00           O  
ATOM    655  C3'  DG A  21     -28.955 -21.637 -20.020  0.00  0.00           C  
ATOM    656  O3'  DG A  21     -28.507 -20.610 -20.960  7.00  0.00           O  
ATOM    657  C2'  DG A  21     -28.027 -22.877 -20.010  8.00  0.00           C  
ATOM    658  C1'  DG A  21     -26.754 -22.298 -19.480  7.00  0.00           C  
ATOM    659  N1   DG A  21     -23.993 -26.186 -21.490  3.00  0.00           N  
ATOM    660  C2   DG A  21     -24.973 -25.455 -22.090  7.00  0.00           C  
ATOM    661  N2   DG A  21     -25.115 -25.673 -23.360  7.00  0.00           N  
ATOM    662  N3   DG A  21     -25.495 -24.434 -21.450  3.00  0.00           N  
ATOM    663  C4   DG A  21     -25.144 -24.238 -20.160  6.00  0.00           C  
ATOM    664  C5   DG A  21     -24.212 -25.022 -19.510  6.00  0.00           C  
ATOM    665  C6   DG A  21     -23.514 -26.067 -20.180  9.00  0.00           C  
ATOM    666  O6   DG A  21     -22.592 -26.786 -19.800  0.00  0.00           O  
ATOM    667  N7   DG A  21     -24.126 -24.552 -18.200  3.00  0.00           N  
ATOM    668  C8   DG A  21     -24.934 -23.528 -18.040  9.00  0.00           C  
ATOM    669  N9   DG A  21     -25.687 -23.306 -19.210  1.00  0.00           N  
ATOM    670  OP1  DG A  21     -30.986 -22.739 -15.320  7.00  0.00           O  
ATOM    671  OP2  DG A  21     -31.227 -24.814 -16.680  4.00  0.00           O1-
ATOM    672  H1   DG A  21     -23.635 -26.971 -22.020  1.00  0.00           H  
ATOM    673  H8   DG A  21     -25.215 -23.003 -17.090  4.00  0.00           H  
ATOM    674  H1'  DG A  21     -26.374 -21.474 -20.070  9.00  0.00           H  
ATOM    675  H2'  DG A  21     -28.333 -23.666 -19.350  8.00  0.00           H  
ATOM    676  H21  DG A  21     -24.404 -26.291 -23.730  7.00  0.00           H  
ATOM    677  H3'  DG A  21     -30.020 -21.928 -20.080  2.00  0.00           H  
ATOM    678  H22  DG A  21     -25.476 -24.919 -23.980  6.00  0.00           H  
ATOM    679  H4'  DG A  21     -28.541 -19.995 -18.630  0.00  0.00           H  
ATOM    680  H5'  DG A  21     -29.162 -21.406 -16.450  0.00  0.00           H  
ATOM    681 H2''  DG A  21     -27.842 -23.250 -21.000  8.00  0.00           H  
ATOM    682 H5''  DG A  21     -30.402 -20.814 -17.590  9.00  0.00           H  
ATOM    683  P    DT A  22     -28.837 -20.739 -22.490  4.00  0.00           P  
ATOM    684  C5'  DT A  22     -26.519 -21.794 -23.230  8.00  0.00           C  
ATOM    685  O5'  DT A  22     -27.908 -21.644 -23.410  3.00  0.00           O  
ATOM    686  C4'  DT A  22     -25.760 -20.920 -24.200  0.00  0.00           C  
ATOM    687  O4'  DT A  22     -24.420 -20.944 -23.670  4.00  0.00           O  
ATOM    688  C3'  DT A  22     -25.580 -21.318 -25.670  7.00  0.00           C  
ATOM    689  O3'  DT A  22     -25.367 -20.253 -26.550  4.00  0.00           O  
ATOM    690  C2'  DT A  22     -24.300 -22.159 -25.650  8.00  0.00           C  
ATOM    691  C1'  DT A  22     -23.532 -21.320 -24.610  9.00  0.00           C  
ATOM    692  N1   DT A  22     -22.365 -22.066 -24.080  7.00  0.00           N  
ATOM    693  C2   DT A  22     -21.190 -21.944 -24.840  2.00  0.00           C  
ATOM    694  O2   DT A  22     -21.201 -21.632 -26.000  7.00  0.00           O  
ATOM    695  N3   DT A  22     -20.003 -22.357 -24.250  1.00  0.00           N  
ATOM    696  C4   DT A  22     -19.954 -22.925 -23.000  6.00  0.00           C  
ATOM    697  O4   DT A  22     -18.882 -23.388 -22.640  7.00  0.00           O  
ATOM    698  C5   DT A  22     -21.209 -22.873 -22.190  0.00  0.00           C  
ATOM    699  C6   DT A  22     -22.359 -22.523 -22.770  2.00  0.00           C  
ATOM    700  C7   DT A  22     -21.114 -23.299 -20.740  3.00  0.00           C  
ATOM    701  OP1  DT A  22     -28.630 -19.393 -22.980  5.00  0.00           O  
ATOM    702  OP2  DT A  22     -30.240 -21.247 -22.630  6.00  0.00           O1-
ATOM    703  H3   DT A  22     -19.150 -22.260 -24.860  2.00  0.00           H  
ATOM    704  H6   DT A  22     -23.264 -22.564 -22.200  7.00  0.00           H  
ATOM    705  H1'  DT A  22     -23.324 -20.419 -25.140  5.00  0.00           H  
ATOM    706  H2'  DT A  22     -24.641 -23.145 -25.310  0.00  0.00           H  
ATOM    707  H3'  DT A  22     -26.491 -21.870 -26.040  4.00  0.00           H  
ATOM    708  H4'  DT A  22     -26.142 -19.848 -24.210  3.00  0.00           H  
ATOM    709  H5'  DT A  22     -26.267 -22.829 -23.450  4.00  0.00           H  
ATOM    710  H71  DT A  22     -22.003 -23.087 -20.170  6.00  0.00           H  
ATOM    711  H72  DT A  22     -20.810 -24.346 -20.670  8.00  0.00           H  
ATOM    712  H73  DT A  22     -20.280 -22.625 -20.420  5.00  0.00           H  
ATOM    713 H2''  DT A  22     -23.691 -22.229 -26.610  6.00  0.00           H  
ATOM    714 H5''  DT A  22     -26.263 -21.536 -22.170  0.00  0.00           H  
ATOM    715  P    DT A  23     -25.703 -20.362 -28.130  2.00  0.00           P  
ATOM    716  C5'  DT A  23     -23.169 -20.327 -28.920  9.00  0.00           C  
ATOM    717  O5'  DT A  23     -24.354 -21.082 -28.720  8.00  0.00           O  
ATOM    718  C4'  DT A  23     -22.462 -20.837 -30.160  1.00  0.00           C  
ATOM    719  O4'  DT A  23     -21.169 -20.248 -30.280  4.00  0.00           O  
ATOM    720  C3'  DT A  23     -22.161 -22.392 -30.170  5.00  0.00           C  
ATOM    721  O3'  DT A  23     -22.562 -22.985 -31.390  8.00  0.00           O  
ATOM    722  C2'  DT A  23     -20.610 -22.343 -29.860  7.00  0.00           C  
ATOM    723  C1'  DT A  23     -20.168 -21.194 -30.770  0.00  0.00           C  
ATOM    724  N1   DT A  23     -18.815 -20.563 -30.590  8.00  0.00           N  
ATOM    725  C2   DT A  23     -18.253 -19.986 -31.770  1.00  0.00           C  
ATOM    726  O2   DT A  23     -18.831 -19.824 -32.830  4.00  0.00           O  
ATOM    727  N3   DT A  23     -16.961 -19.524 -31.710  4.00  0.00           N  
ATOM    728  C4   DT A  23     -16.137 -19.736 -30.580  6.00  0.00           C  
ATOM    729  O4   DT A  23     -14.984 -19.453 -30.650  4.00  0.00           O  
ATOM    730  C5   DT A  23     -16.742 -20.373 -29.430  4.00  0.00           C  
ATOM    731  C6   DT A  23     -18.042 -20.695 -29.410  1.00  0.00           C  
ATOM    732  C7   DT A  23     -15.925 -20.608 -28.180  5.00  0.00           C  
ATOM    733  OP1  DT A  23     -25.938 -19.027 -28.750  8.00  0.00           O  
ATOM    734  OP2  DT A  23     -26.757 -21.321 -28.370  6.00  0.00           O1-
ATOM    735  H3   DT A  23     -16.612 -19.068 -32.540  7.00  0.00           H  
ATOM    736  H6   DT A  23     -18.417 -21.194 -28.520  5.00  0.00           H  
ATOM    737  H1'  DT A  23     -20.321 -21.527 -31.810  7.00  0.00           H  
ATOM    738  H2'  DT A  23     -20.403 -22.129 -28.830  2.00  0.00           H  
ATOM    739  H3'  DT A  23     -22.649 -22.874 -29.250  5.00  0.00           H  
ATOM    740  H4'  DT A  23     -23.060 -20.601 -30.990  7.00  0.00           H  
ATOM    741  H5'  DT A  23     -22.470 -20.310 -28.040  1.00  0.00           H  
ATOM    742  H71  DT A  23     -15.659 -19.574 -27.900  8.00  0.00           H  
ATOM    743  H72  DT A  23     -16.469 -21.083 -27.380  1.00  0.00           H  
ATOM    744  H73  DT A  23     -15.047 -21.185 -28.410  8.00  0.00           H  
ATOM    745 H2''  DT A  23     -20.114 -23.196 -30.210  1.00  0.00           H  
ATOM    746 H5''  DT A  23     -23.420 -19.309 -29.070  3.00  0.00           H  
ATOM    747  P    DA A  24     -23.327 -24.369 -31.420  0.00  0.00           P  
ATOM    748  C5'  DA A  24     -21.189 -25.812 -31.640  1.00  0.00           C  
ATOM    749  O5'  DA A  24     -22.353 -25.421 -30.910  0.00  0.00           O  
ATOM    750  C4'  DA A  24     -20.496 -26.965 -31.040  5.00  0.00           C  
ATOM    751  O4'  DA A  24     -20.017 -26.804 -29.670  9.00  0.00           O  
ATOM    752  C3'  DA A  24     -21.296 -28.396 -30.940  9.00  0.00           C  
ATOM    753  O3'  DA A  24     -20.323 -29.408 -31.310  8.00  0.00           O  
ATOM    754  C2'  DA A  24     -21.691 -28.410 -29.480  5.00  0.00           C  
ATOM    755  C1'  DA A  24     -20.346 -27.907 -28.910  3.00  0.00           C  
ATOM    756  N1   DA A  24     -22.758 -25.278 -25.040  2.00  0.00           N  
ATOM    757  C2   DA A  24     -23.007 -25.356 -26.340  0.00  0.00           C  
ATOM    758  N3   DA A  24     -22.344 -26.031 -27.250  7.00  0.00           N  
ATOM    759  C4   DA A  24     -21.313 -26.805 -26.720  5.00  0.00           C  
ATOM    760  C5   DA A  24     -21.005 -26.923 -25.400  8.00  0.00           C  
ATOM    761  C6   DA A  24     -21.761 -25.990 -24.550  9.00  0.00           C  
ATOM    762  N6   DA A  24     -21.456 -25.732 -23.320  9.00  0.00           N  
ATOM    763  N7   DA A  24     -19.873 -27.758 -25.260  7.00  0.00           N  
ATOM    764  C8   DA A  24     -19.549 -28.037 -26.480  0.00  0.00           C  
ATOM    765  N9   DA A  24     -20.337 -27.471 -27.460  7.00  0.00           N  
ATOM    766  OP1  DA A  24     -23.528 -24.671 -32.830  1.00  0.00           O  
ATOM    767  OP2  DA A  24     -24.477 -24.356 -30.450  3.00  0.00           O1-
ATOM    768  H2   DA A  24     -23.815 -24.843 -26.790  1.00  0.00           H  
ATOM    769  H8   DA A  24     -18.775 -28.794 -26.680  4.00  0.00           H  
ATOM    770  H1'  DA A  24     -19.490 -28.663 -29.010  8.00  0.00           H  
ATOM    771  H2'  DA A  24     -22.505 -27.673 -29.420  4.00  0.00           H  
ATOM    772  H3'  DA A  24     -22.105 -28.433 -31.640  2.00  0.00           H  
ATOM    773  H4'  DA A  24     -19.619 -27.253 -31.730  3.00  0.00           H  
ATOM    774  H5'  DA A  24     -20.513 -25.006 -31.630  0.00  0.00           H  
ATOM    775  H61  DA A  24     -22.137 -25.426 -22.740  9.00  0.00           H  
ATOM    776  H62  DA A  24     -20.677 -26.168 -22.880  5.00  0.00           H  
ATOM    777 H2''  DA A  24     -22.010 -29.415 -29.210  3.00  0.00           H  
ATOM    778 H5''  DA A  24     -21.423 -26.011 -32.690  8.00  0.00           H  
ATOM    779  P    DG A  25     -20.430 -30.926 -31.010  5.00  0.00           P  
ATOM    780  C5'  DG A  25     -18.362 -31.230 -29.320  4.00  0.00           C  
ATOM    781  O5'  DG A  25     -19.784 -31.264 -29.540  7.00  0.00           O  
ATOM    782  C4'  DG A  25     -18.250 -31.831 -27.960  6.00  0.00           C  
ATOM    783  O4'  DG A  25     -18.810 -30.962 -26.990  1.00  0.00           O  
ATOM    784  C3'  DG A  25     -18.945 -33.222 -27.850  3.00  0.00           C  
ATOM    785  O3'  DG A  25     -18.071 -34.021 -27.060  8.00  0.00           O  
ATOM    786  C2'  DG A  25     -20.256 -32.819 -27.170  0.00  0.00           C  
ATOM    787  C1'  DG A  25     -19.721 -31.771 -26.210  7.00  0.00           C  
ATOM    788  N1   DG A  25     -21.836 -29.624 -22.040  3.00  0.00           N  
ATOM    789  C2   DG A  25     -20.704 -30.329 -22.170  3.00  0.00           C  
ATOM    790  N2   DG A  25     -20.100 -30.695 -21.090  7.00  0.00           N  
ATOM    791  N3   DG A  25     -20.202 -30.850 -23.280  2.00  0.00           N  
ATOM    792  C4   DG A  25     -21.081 -30.680 -24.320  6.00  0.00           C  
ATOM    793  C5   DG A  25     -22.261 -29.887 -24.350  1.00  0.00           C  
ATOM    794  C6   DG A  25     -22.585 -29.230 -23.120  0.00  0.00           C  
ATOM    795  O6   DG A  25     -23.517 -28.396 -22.890  2.00  0.00           O  
ATOM    796  N7   DG A  25     -22.897 -29.989 -25.580  7.00  0.00           N  
ATOM    797  C8   DG A  25     -22.054 -30.684 -26.220  7.00  0.00           C  
ATOM    798  N9   DG A  25     -20.874 -30.996 -25.600  4.00  0.00           N  
ATOM    799  OP1  DG A  25     -19.624 -31.535 -32.080  7.00  0.00           O  
ATOM    800  OP2  DG A  25     -21.829 -31.316 -30.980  9.00  0.00           O1-
ATOM    801  H1   DG A  25     -22.215 -29.419 -21.130  9.00  0.00           H  
ATOM    802  H8   DG A  25     -22.150 -30.896 -27.250  3.00  0.00           H  
ATOM    803  H1'  DG A  25     -19.042 -32.281 -25.460  7.00  0.00           H  
ATOM    804  H2'  DG A  25     -20.873 -32.437 -27.970  9.00  0.00           H  
ATOM    805  H21  DG A  25     -20.530 -30.476 -20.260  7.00  0.00           H  
ATOM    806  H3'  DG A  25     -19.111 -33.673 -28.810  2.00  0.00           H  
ATOM    807  H22  DG A  25     -19.446 -31.472 -21.200  7.00  0.00           H  
ATOM    808  H4'  DG A  25     -17.187 -32.019 -27.770  8.00  0.00           H  
ATOM    809  H5'  DG A  25     -17.921 -30.240 -29.460  2.00  0.00           H  
ATOM    810 H2''  DG A  25     -20.808 -33.612 -26.670  8.00  0.00           H  
ATOM    811 H5''  DG A  25     -17.845 -31.966 -29.970  4.00  0.00           H  
ATOM    812  P    DG A  26     -18.059 -35.639 -27.180  0.00  0.00           P  
ATOM    813  C5'  DG A  26     -15.539 -35.863 -26.820  3.00  0.00           C  
ATOM    814  O5'  DG A  26     -16.830 -36.102 -26.370  9.00  0.00           O  
ATOM    815  C4'  DG A  26     -14.470 -36.151 -25.760  5.00  0.00           C  
ATOM    816  O4'  DG A  26     -14.670 -35.263 -24.730  4.00  0.00           O  
ATOM    817  C3'  DG A  26     -14.345 -37.540 -25.120  8.00  0.00           C  
ATOM    818  O3'  DG A  26     -12.945 -37.683 -24.800  7.00  0.00           O  
ATOM    819  C2'  DG A  26     -15.051 -37.326 -23.860  8.00  0.00           C  
ATOM    820  C1'  DG A  26     -14.549 -35.907 -23.500  0.00  0.00           C  
ATOM    821  N1   DG A  26     -19.090 -33.858 -22.060  8.00  0.00           N  
ATOM    822  C2   DG A  26     -18.904 -34.674 -23.120  3.00  0.00           C  
ATOM    823  N2   DG A  26     -19.857 -34.872 -23.970  0.00  0.00           N  
ATOM    824  N3   DG A  26     -17.675 -35.096 -23.410  2.00  0.00           N  
ATOM    825  C4   DG A  26     -16.692 -34.816 -22.470  9.00  0.00           C  
ATOM    826  C5   DG A  26     -16.898 -34.018 -21.360  5.00  0.00           C  
ATOM    827  C6   DG A  26     -18.122 -33.383 -21.140  3.00  0.00           C  
ATOM    828  O6   DG A  26     -18.487 -32.715 -20.190  5.00  0.00           O  
ATOM    829  N7   DG A  26     -15.692 -33.802 -20.690  6.00  0.00           N  
ATOM    830  C8   DG A  26     -14.832 -34.543 -21.310  3.00  0.00           C  
ATOM    831  N9   DG A  26     -15.351 -35.231 -22.400  2.00  0.00           N  
ATOM    832  OP1  DG A  26     -17.910 -36.034 -28.650  6.00  0.00           O  
ATOM    833  OP2  DG A  26     -19.215 -36.087 -26.410  0.00  0.00           O1-
ATOM    834  H1   DG A  26     -19.973 -33.525 -21.860  9.00  0.00           H  
ATOM    835  H8   DG A  26     -13.743 -34.512 -21.140  7.00  0.00           H  
ATOM    836  H1'  DG A  26     -13.492 -36.039 -23.170  1.00  0.00           H  
ATOM    837  H2'  DG A  26     -16.124 -37.389 -24.070  6.00  0.00           H  
ATOM    838  H21  DG A  26     -20.856 -34.657 -23.710  5.00  0.00           H  
ATOM    839  H3'  DG A  26     -14.720 -38.348 -25.610  1.00  0.00           H  
ATOM    840  H22  DG A  26     -19.675 -35.302 -24.830  9.00  0.00           H  
ATOM    841  H4'  DG A  26     -13.483 -35.973 -26.230  0.00  0.00           H  
ATOM    842  H5'  DG A  26     -15.308 -34.849 -27.180  8.00  0.00           H  
ATOM    843 H2''  DG A  26     -14.697 -38.101 -23.190  9.00  0.00           H  
ATOM    844 H5''  DG A  26     -15.427 -36.469 -27.690  4.00  0.00           H  
ATOM    845  P    DG A  27     -12.250 -39.118 -24.570  3.00  0.00           P  
ATOM    846  C5'  DG A  27     -11.816 -38.381 -22.090  2.00  0.00           C  
ATOM    847  O5'  DG A  27     -12.452 -39.242 -23.010  4.00  0.00           O  
ATOM    848  C4'  DG A  27     -12.335 -38.539 -20.660  8.00  0.00           C  
ATOM    849  O4'  DG A  27     -13.625 -37.923 -20.510  2.00  0.00           O  
ATOM    850  C3'  DG A  27     -12.563 -39.923 -20.170  8.00  0.00           C  
ATOM    851  O3'  DG A  27     -11.733 -39.977 -18.980  3.00  0.00           O  
ATOM    852  C2'  DG A  27     -14.102 -39.960 -19.920  5.00  0.00           C  
ATOM    853  C1'  DG A  27     -14.408 -38.542 -19.560  3.00  0.00           C  
ATOM    854  N1   DG A  27     -18.329 -35.609 -17.860  4.00  0.00           N  
ATOM    855  C2   DG A  27     -17.170 -36.010 -17.290  2.00  0.00           C  
ATOM    856  N2   DG A  27     -17.132 -35.813 -16.010  4.00  0.00           N  
ATOM    857  N3   DG A  27     -16.249 -36.830 -17.820  3.00  0.00           N  
ATOM    858  C4   DG A  27     -16.555 -37.215 -19.090  0.00  0.00           C  
ATOM    859  C5   DG A  27     -17.762 -36.966 -19.800  5.00  0.00           C  
ATOM    860  C6   DG A  27     -18.671 -36.066 -19.130  6.00  0.00           C  
ATOM    861  O6   DG A  27     -19.753 -35.746 -19.510  1.00  0.00           O  
ATOM    862  N7   DG A  27     -17.765 -37.627 -20.970  7.00  0.00           N  
ATOM    863  C8   DG A  27     -16.650 -38.266 -20.930  7.00  0.00           C  
ATOM    864  N9   DG A  27     -15.851 -38.106 -19.780  0.00  0.00           N  
ATOM    865  OP1  DG A  27     -10.808 -39.005 -24.760  4.00  0.00           O  
ATOM    866  OP2  DG A  27     -13.073 -40.218 -25.120  2.00  0.00           O1-
ATOM    867  H1   DG A  27     -18.995 -35.085 -17.270  0.00  0.00           H  
ATOM    868  H8   DG A  27     -16.358 -38.943 -21.770  8.00  0.00           H  
ATOM    869  H1'  DG A  27     -14.047 -38.234 -18.620  9.00  0.00           H  
ATOM    870  H2'  DG A  27     -14.655 -40.253 -20.800  7.00  0.00           H  
ATOM    871  H21  DG A  27     -17.781 -35.169 -15.520  7.00  0.00           H  
ATOM    872  H3'  DG A  27     -12.286 -40.624 -20.940  1.00  0.00           H  
ATOM    873  H22  DG A  27     -16.303 -36.152 -15.500  0.00  0.00           H  
ATOM    874  H4'  DG A  27     -11.666 -37.865 -20.060  3.00  0.00           H  
ATOM    875  H5'  DG A  27     -12.088 -37.344 -22.380  6.00  0.00           H  
ATOM    876 H2''  DG A  27     -14.429 -40.563 -19.080  9.00  0.00           H  
ATOM    877 H5''  DG A  27     -10.749 -38.503 -22.160  6.00  0.00           H  
ATOM    878  P    DT A  28     -10.800 -41.261 -18.490  4.00  0.00           P  
ATOM    879  C5'  DT A  28     -11.359 -43.343 -17.110  3.00  0.00           C  
ATOM    880  O5'  DT A  28     -11.817 -42.235 -17.810  2.00  0.00           O  
ATOM    881  C4'  DT A  28     -12.388 -43.776 -16.050  9.00  0.00           C  
ATOM    882  O4'  DT A  28     -12.555 -42.695 -15.090  7.00  0.00           O  
ATOM    883  C3'  DT A  28     -13.748 -44.143 -16.600  9.00  0.00           C  
ATOM    884  O3'  DT A  28     -14.384 -45.116 -15.820  1.00  0.00           O  
ATOM    885  C2'  DT A  28     -14.490 -42.863 -16.390  3.00  0.00           C  
ATOM    886  C1'  DT A  28     -13.935 -42.412 -15.060  6.00  0.00           C  
ATOM    887  N1   DT A  28     -14.090 -40.913 -14.950  8.00  0.00           N  
ATOM    888  C2   DT A  28     -15.021 -40.375 -14.070  8.00  0.00           C  
ATOM    889  O2   DT A  28     -15.919 -41.063 -13.480  2.00  0.00           O  
ATOM    890  N3   DT A  28     -14.941 -38.993 -13.850  0.00  0.00           N  
ATOM    891  C4   DT A  28     -14.142 -38.127 -14.570  0.00  0.00           C  
ATOM    892  O4   DT A  28     -14.101 -36.935 -14.260  8.00  0.00           O  
ATOM    893  C5   DT A  28     -13.389 -38.693 -15.650  7.00  0.00           C  
ATOM    894  C6   DT A  28     -13.299 -40.009 -15.780  0.00  0.00           C  
ATOM    895  C7   DT A  28     -12.460 -37.739 -16.450  9.00  0.00           C  
ATOM    896  OP1  DT A  28      -9.741 -40.768 -17.610  3.00  0.00           O  
ATOM    897  OP2  DT A  28     -10.377 -41.992 -19.660  3.00  0.00           O1-
ATOM    898  H3   DT A  28     -15.669 -38.588 -13.320  0.00  0.00           H  
ATOM    899  H6   DT A  28     -12.531 -40.508 -16.420  5.00  0.00           H  
ATOM    900  H1'  DT A  28     -14.535 -42.975 -14.260  4.00  0.00           H  
ATOM    901  H2'  DT A  28     -14.262 -42.254 -17.190  5.00  0.00           H  
ATOM    902  H3'  DT A  28     -13.682 -44.424 -17.640  7.00  0.00           H  
ATOM    903  H4'  DT A  28     -11.982 -44.592 -15.430  4.00  0.00           H  
ATOM    904  H5'  DT A  28     -10.418 -43.206 -16.590  8.00  0.00           H  
ATOM    905  H71  DT A  28     -11.741 -37.257 -15.810  3.00  0.00           H  
ATOM    906  H72  DT A  28     -11.946 -38.239 -17.280  9.00  0.00           H  
ATOM    907  H73  DT A  28     -12.998 -36.916 -16.990  1.00  0.00           H  
ATOM    908 H2''  DT A  28     -15.585 -43.001 -16.530  3.00  0.00           H  
ATOM    909 H5''  DT A  28     -11.205 -44.248 -17.720  6.00  0.00           H  
ATOM    910  P    DT A  29     -14.373 -46.647 -16.260  1.00  0.00           P  
ATOM    911  C5'  DT A  29     -16.953 -46.495 -16.860  4.00  0.00           C  
ATOM    912  O5'  DT A  29     -15.620 -46.750 -17.250  3.00  0.00           O  
ATOM    913  C4'  DT A  29     -17.996 -46.568 -17.990  8.00  0.00           C  
ATOM    914  O4'  DT A  29     -19.206 -46.014 -17.370  7.00  0.00           O  
ATOM    915  C3'  DT A  29     -17.693 -45.783 -19.280  7.00  0.00           C  
ATOM    916  O3'  DT A  29     -18.395 -46.285 -20.380  6.00  0.00           O  
ATOM    917  C2'  DT A  29     -18.173 -44.382 -18.890  2.00  0.00           C  
ATOM    918  C1'  DT A  29     -19.483 -44.768 -18.190  0.00  0.00           C  
ATOM    919  N1   DT A  29     -20.194 -43.722 -17.500  3.00  0.00           N  
ATOM    920  C2   DT A  29     -21.501 -43.436 -17.910  1.00  0.00           C  
ATOM    921  O2   DT A  29     -22.091 -44.062 -18.780  8.00  0.00           O  
ATOM    922  N3   DT A  29     -22.109 -42.354 -17.260  4.00  0.00           N  
ATOM    923  C4   DT A  29     -21.622 -41.629 -16.170  5.00  0.00           C  
ATOM    924  O4   DT A  29     -22.389 -40.780 -15.590  6.00  0.00           O  
ATOM    925  C5   DT A  29     -20.280 -42.051 -15.770  7.00  0.00           C  
ATOM    926  C6   DT A  29     -19.575 -42.954 -16.480  4.00  0.00           C  
ATOM    927  C7   DT A  29     -19.519 -41.345 -14.600  8.00  0.00           C  
ATOM    928  OP1  DT A  29     -14.655 -47.430 -15.010  6.00  0.00           O  
ATOM    929  OP2  DT A  29     -13.138 -46.849 -16.970  6.00  0.00           O1-
ATOM    930  H3   DT A  29     -22.844 -41.895 -17.680  9.00  0.00           H  
ATOM    931  H6   DT A  29     -18.577 -43.230 -16.160  5.00  0.00           H  
ATOM    932  H1'  DT A  29     -20.169 -45.118 -18.980  3.00  0.00           H  
ATOM    933  H2'  DT A  29     -17.394 -43.980 -18.200  6.00  0.00           H  
ATOM    934  H3'  DT A  29     -16.639 -45.896 -19.450  4.00  0.00           H  
ATOM    935  H4'  DT A  29     -18.054 -47.608 -18.220  4.00  0.00           H  
ATOM    936  H5'  DT A  29     -16.862 -45.493 -16.380  9.00  0.00           H  
ATOM    937  H71  DT A  29     -19.776 -41.838 -13.660  1.00  0.00           H  
ATOM    938  H72  DT A  29     -18.458 -41.536 -14.760  5.00  0.00           H  
ATOM    939  H73  DT A  29     -19.813 -40.268 -14.590  0.00  0.00           H  
ATOM    940 H2''  DT A  29     -18.273 -43.809 -19.820  8.00  0.00           H  
ATOM    941 H5''  DT A  29     -17.307 -47.073 -16.130  6.00  0.00           H  
ATOM    942  P    DA A  30     -18.203 -45.825 -21.910  2.00  0.00           P  
ATOM    943  C5'  DA A  30     -20.354 -44.366 -21.860  1.00  0.00           C  
ATOM    944  O5'  DA A  30     -18.893 -44.454 -22.000  6.00  0.00           O  
ATOM    945  C4'  DA A  30     -20.825 -42.907 -21.920  6.00  0.00           C  
ATOM    946  O4'  DA A  30     -20.415 -42.174 -20.830  6.00  0.00           O  
ATOM    947  C3'  DA A  30     -20.403 -42.129 -23.220  2.00  0.00           C  
ATOM    948  O3'  DA A  30     -21.483 -41.316 -23.780  5.00  0.00           O  
ATOM    949  C2'  DA A  30     -19.322 -41.149 -22.610  4.00  0.00           C  
ATOM    950  C1'  DA A  30     -19.930 -40.921 -21.240  1.00  0.00           C  
ATOM    951  N1   DA A  30     -19.324 -38.629 -16.620  6.00  0.00           N  
ATOM    952  C2   DA A  30     -20.248 -38.423 -17.560  3.00  0.00           C  
ATOM    953  N3   DA A  30     -20.298 -38.982 -18.730  0.00  0.00           N  
ATOM    954  C4   DA A  30     -19.232 -39.685 -19.020  8.00  0.00           C  
ATOM    955  C5   DA A  30     -18.171 -39.955 -18.200  3.00  0.00           C  
ATOM    956  C6   DA A  30     -18.309 -39.371 -16.910  9.00  0.00           C  
ATOM    957  N6   DA A  30     -17.400 -39.516 -15.930  6.00  0.00           N  
ATOM    958  N7   DA A  30     -17.357 -40.929 -18.730  3.00  0.00           N  
ATOM    959  C8   DA A  30     -17.790 -41.118 -19.910  9.00  0.00           C  
ATOM    960  N9   DA A  30     -18.997 -40.466 -20.150  0.00  0.00           N  
ATOM    961  OP1  DA A  30     -18.899 -46.795 -22.790  8.00  0.00           O  
ATOM    962  OP2  DA A  30     -16.747 -45.615 -22.210  9.00  0.00           O1-
ATOM    963  H2   DA A  30     -21.210 -38.067 -17.300  3.00  0.00           H  
ATOM    964  H8   DA A  30     -17.294 -41.828 -20.650  0.00  0.00           H  
ATOM    965  H1'  DA A  30     -20.768 -40.283 -21.230  4.00  0.00           H  
ATOM    966  H2'  DA A  30     -18.333 -41.650 -22.640  8.00  0.00           H  
ATOM    967  H3'  DA A  30     -19.917 -42.828 -24.000  0.00  0.00           H  
ATOM    968  H4'  DA A  30     -21.924 -42.926 -21.960  6.00  0.00           H  
ATOM    969  H5'  DA A  30     -20.648 -44.850 -20.870  4.00  0.00           H  
ATOM    970  H61  DA A  30     -17.507 -39.005 -15.060  2.00  0.00           H  
ATOM    971  H62  DA A  30     -16.576 -40.124 -15.970  4.00  0.00           H  
ATOM    972 H2''  DA A  30     -19.328 -40.172 -23.190  0.00  0.00           H  
ATOM    973 H5''  DA A  30     -20.756 -44.878 -22.660  4.00  0.00           H  
ATOM    974  P    DG A  31     -21.590 -41.330 -25.380  1.00  0.00           P  
ATOM    975  C5'  DG A  31     -24.214 -40.726 -25.430  5.00  0.00           C  
ATOM    976  O5'  DG A  31     -22.849 -40.323 -25.560  3.00  0.00           O  
ATOM    977  C4'  DG A  31     -25.241 -39.516 -25.310  0.00  0.00           C  
ATOM    978  O4'  DG A  31     -25.223 -38.993 -24.000  0.00  0.00           O  
ATOM    979  C3'  DG A  31     -24.996 -38.412 -26.360  8.00  0.00           C  
ATOM    980  O3'  DG A  31     -26.026 -38.363 -27.320  7.00  0.00           O  
ATOM    981  C2'  DG A  31     -24.944 -37.161 -25.450  4.00  0.00           C  
ATOM    982  C1'  DG A  31     -25.706 -37.623 -24.170  5.00  0.00           C  
ATOM    983  N1   DG A  31     -22.440 -35.983 -20.480  0.00  0.00           N  
ATOM    984  C2   DG A  31     -22.149 -36.761 -21.440  5.00  0.00           C  
ATOM    985  N2   DG A  31     -20.882 -37.092 -21.530  3.00  0.00           N  
ATOM    986  N3   DG A  31     -23.014 -37.161 -22.410  4.00  0.00           N  
ATOM    987  C4   DG A  31     -24.338 -36.666 -22.230  6.00  0.00           C  
ATOM    988  C5   DG A  31     -24.718 -35.888 -21.170  1.00  0.00           C  
ATOM    989  C6   DG A  31     -23.661 -35.458 -20.290  0.00  0.00           C  
ATOM    990  O6   DG A  31     -23.730 -34.716 -19.270  2.00  0.00           O  
ATOM    991  N7   DG A  31     -26.070 -35.546 -21.150  7.00  0.00           N  
ATOM    992  C8   DG A  31     -26.502 -36.084 -22.240  1.00  0.00           C  
ATOM    993  N9   DG A  31     -25.477 -36.754 -23.000  4.00  0.00           N  
ATOM    994  OP1  DG A  31     -21.923 -42.675 -25.820  5.00  0.00           O  
ATOM    995  OP2  DG A  31     -20.435 -40.679 -25.960  4.00  0.00           O1-
ATOM    996  H1   DG A  31     -21.699 -35.747 -19.840  6.00  0.00           H  
ATOM    997  H8   DG A  31     -27.566 -36.001 -22.560  7.00  0.00           H  
ATOM    998  H1'  DG A  31     -26.819 -37.661 -24.450  4.00  0.00           H  
ATOM    999  H2'  DG A  31     -23.917 -36.865 -25.160  0.00  0.00           H  
ATOM   1000  H21  DG A  31     -20.267 -36.839 -20.810  6.00  0.00           H  
ATOM   1001  H3'  DG A  31     -24.046 -38.555 -26.850  2.00  0.00           H  
ATOM   1002  H22  DG A  31     -20.519 -37.682 -22.300  7.00  0.00           H  
ATOM   1003  H4'  DG A  31     -26.221 -39.965 -25.580  1.00  0.00           H  
ATOM   1004  H5'  DG A  31     -24.288 -41.384 -24.500  5.00  0.00           H  
ATOM   1005 H2''  DG A  31     -25.281 -36.296 -26.010  8.00  0.00           H  
ATOM   1006 H5''  DG A  31     -24.518 -41.375 -26.220  2.00  0.00           H  
ATOM   1007  P    DG A  32     -25.962 -37.502 -28.720  9.00  0.00           P  
ATOM   1008  C5'  DG A  32     -27.404 -35.637 -27.510  0.00  0.00           C  
ATOM   1009  O5'  DG A  32     -26.202 -35.998 -28.290  5.00  0.00           O  
ATOM   1010  C4'  DG A  32     -27.413 -34.263 -26.880  3.00  0.00           C  
ATOM   1011  O4'  DG A  32     -26.629 -34.118 -25.710  9.00  0.00           O  
ATOM   1012  C3'  DG A  32     -26.960 -33.248 -27.930  5.00  0.00           C  
ATOM   1013  O3'  DG A  32     -27.933 -32.212 -28.160  2.00  0.00           O  
ATOM   1014  C2'  DG A  32     -25.709 -32.738 -27.270  0.00  0.00           C  
ATOM   1015  C1'  DG A  32     -25.853 -33.009 -25.790  7.00  0.00           C  
ATOM   1016  N1   DG A  32     -23.608 -32.265 -21.410  9.00  0.00           N  
ATOM   1017  C2   DG A  32     -24.706 -31.620 -21.830  9.00  0.00           C  
ATOM   1018  N2   DG A  32     -25.332 -30.858 -21.020  6.00  0.00           N  
ATOM   1019  N3   DG A  32     -25.110 -31.764 -23.090  3.00  0.00           N  
ATOM   1020  C4   DG A  32     -24.402 -32.688 -23.800  9.00  0.00           C  
ATOM   1021  C5   DG A  32     -23.231 -33.270 -23.370  2.00  0.00           C  
ATOM   1022  C6   DG A  32     -22.758 -33.104 -22.070  4.00  0.00           C  
ATOM   1023  O6   DG A  32     -21.675 -33.334 -21.500  9.00  0.00           O  
ATOM   1024  N7   DG A  32     -22.747 -34.035 -24.400  7.00  0.00           N  
ATOM   1025  C8   DG A  32     -23.512 -33.813 -25.390  6.00  0.00           C  
ATOM   1026  N9   DG A  32     -24.594 -33.108 -25.090  3.00  0.00           N  
ATOM   1027  OP1  DG A  32     -27.085 -37.969 -29.440  3.00  0.00           O  
ATOM   1028  OP2  DG A  32     -24.626 -37.529 -29.310  1.00  0.00           O1-
ATOM   1029  H1   DG A  32     -23.167 -32.041 -20.520  6.00  0.00           H  
ATOM   1030  H8   DG A  32     -23.412 -34.226 -26.370  9.00  0.00           H  
ATOM   1031  H1'  DG A  32     -26.306 -32.255 -25.210  8.00  0.00           H  
ATOM   1032  H2'  DG A  32     -24.889 -33.257 -27.710  7.00  0.00           H  
ATOM   1033  H21  DG A  32     -24.854 -30.562 -20.170  5.00  0.00           H  
ATOM   1034  H3'  DG A  32     -26.721 -33.763 -28.900  7.00  0.00           H  
ATOM   1035  H22  DG A  32     -26.003 -30.255 -21.480  7.00  0.00           H  
ATOM   1036  H4'  DG A  32     -28.444 -33.974 -26.680  9.00  0.00           H  
ATOM   1037  H5'  DG A  32     -27.507 -36.296 -26.690  5.00  0.00           H  
ATOM   1038 H2''  DG A  32     -25.609 -31.654 -27.470  8.00  0.00           H  
ATOM   1039 H5''  DG A  32     -28.267 -35.869 -28.170  4.00  0.00           H  
ATOM   1040  P    DG A  33     -28.469 -31.848 -29.610  5.00  0.00           P  
ATOM   1041  C5'  DG A  33     -28.977 -29.367 -29.090  0.00  0.00           C  
ATOM   1042  O5'  DG A  33     -29.430 -30.725 -29.180  5.00  0.00           O  
ATOM   1043  C4'  DG A  33     -30.206 -28.449 -28.890  1.00  0.00           C  
ATOM   1044  O4'  DG A  33     -30.581 -28.571 -27.490  2.00  0.00           O  
ATOM   1045  C3'  DG A  33     -30.089 -26.983 -29.250  6.00  0.00           C  
ATOM   1046  O3'  DG A  33     -29.312 -26.685 -30.370  6.00  0.00           O  
ATOM   1047  C2'  DG A  33     -29.595 -26.414 -27.910  9.00  0.00           C  
ATOM   1048  C1'  DG A  33     -30.420 -27.363 -26.930  5.00  0.00           C  
ATOM   1049  N1   DG A  33     -26.360 -28.805 -24.160  4.00  0.00           N  
ATOM   1050  C2   DG A  33     -26.443 -28.475 -25.500  4.00  0.00           C  
ATOM   1051  N2   DG A  33     -25.393 -28.683 -26.160  4.00  0.00           N  
ATOM   1052  N3   DG A  33     -27.550 -28.011 -26.040  8.00  0.00           N  
ATOM   1053  C4   DG A  33     -28.568 -27.873 -25.180  8.00  0.00           C  
ATOM   1054  C5   DG A  33     -28.592 -28.132 -23.880  0.00  0.00           C  
ATOM   1055  C6   DG A  33     -27.380 -28.647 -23.270  2.00  0.00           C  
ATOM   1056  O6   DG A  33     -27.053 -28.832 -22.100  4.00  0.00           O  
ATOM   1057  N7   DG A  33     -29.811 -27.771 -23.300  6.00  0.00           N  
ATOM   1058  C8   DG A  33     -30.503 -27.312 -24.300  0.00  0.00           C  
ATOM   1059  N9   DG A  33     -29.810 -27.447 -25.530  3.00  0.00           N  
ATOM   1060  OP1  DG A  33     -29.253 -32.975 -30.080  8.00  0.00           O  
ATOM   1061  OP2  DG A  33     -27.392 -31.376 -30.480  5.00  0.00           O1-
ATOM   1062  H1   DG A  33     -25.544 -29.231 -23.770  3.00  0.00           H  
ATOM   1063  H8   DG A  33     -31.547 -27.057 -24.270  4.00  0.00           H  
ATOM   1064  H1'  DG A  33     -31.474 -27.094 -26.790  4.00  0.00           H  
ATOM   1065  H2'  DG A  33     -28.525 -26.583 -27.680  2.00  0.00           H  
ATOM   1066  H21  DG A  33     -24.567 -28.992 -25.700  6.00  0.00           H  
ATOM   1067  H3'  DG A  33     -31.037 -26.587 -29.430  0.00  0.00           H  
ATOM   1068  H22  DG A  33     -25.483 -28.621 -27.180  4.00  0.00           H  
ATOM   1069  H4'  DG A  33     -31.047 -28.839 -29.430  5.00  0.00           H  
ATOM   1070  H5'  DG A  33     -28.426 -29.047 -29.900  6.00  0.00           H  
ATOM   1071 H2''  DG A  33     -29.959 -25.400 -27.650  7.00  0.00           H  
ATOM   1072 H5''  DG A  33     -28.354 -29.270 -28.180  5.00  0.00           H  
ATOM   1073  P    DT A  34     -29.901 -26.632 -31.880  6.00  0.00           P  
ATOM   1074  C5'  DT A  34     -27.510 -26.053 -32.710  7.00  0.00           C  
ATOM   1075  O5'  DT A  34     -28.954 -25.795 -32.730  1.00  0.00           O  
ATOM   1076  C4'  DT A  34     -26.727 -25.216 -33.700  6.00  0.00           C  
ATOM   1077  O4'  DT A  34     -27.161 -25.645 -34.970  9.00  0.00           O  
ATOM   1078  C3'  DT A  34     -27.063 -23.740 -33.660  5.00  0.00           C  
ATOM   1079  O3'  DT A  34     -25.991 -22.952 -34.090  0.00  0.00           O  
ATOM   1080  C2'  DT A  34     -28.248 -23.663 -34.680  8.00  0.00           C  
ATOM   1081  C1'  DT A  34     -27.817 -24.659 -35.720  1.00  0.00           C  
ATOM   1082  N1   DT A  34     -28.904 -25.198 -36.550  7.00  0.00           N  
ATOM   1083  C2   DT A  34     -29.081 -24.784 -37.870  4.00  0.00           C  
ATOM   1084  O2   DT A  34     -28.575 -23.766 -38.270  5.00  0.00           O  
ATOM   1085  N3   DT A  34     -29.894 -25.539 -38.670  7.00  0.00           N  
ATOM   1086  C4   DT A  34     -30.594 -26.607 -38.310  4.00  0.00           C  
ATOM   1087  O4   DT A  34     -31.191 -27.297 -39.160  8.00  0.00           O  
ATOM   1088  C5   DT A  34     -30.519 -26.916 -36.870  5.00  0.00           C  
ATOM   1089  C6   DT A  34     -29.677 -26.257 -36.040  1.00  0.00           C  
ATOM   1090  C7   DT A  34     -31.330 -28.098 -36.360  5.00  0.00           C  
ATOM   1091  OP1  DT A  34     -31.268 -26.070 -31.870  4.00  0.00           O  
ATOM   1092  OP2  DT A  34     -29.689 -28.017 -32.410  3.00  0.00           O1-
ATOM   1093  H3   DT A  34     -29.914 -25.312 -39.630  6.00  0.00           H  
ATOM   1094  H6   DT A  34     -29.566 -26.499 -35.030  5.00  0.00           H  
ATOM   1095  H1'  DT A  34     -27.149 -24.112 -36.270  3.00  0.00           H  
ATOM   1096  H2'  DT A  34     -29.163 -23.921 -34.240  8.00  0.00           H  
ATOM   1097  H3'  DT A  34     -27.409 -23.313 -32.680  8.00  0.00           H  
ATOM   1098  H4'  DT A  34     -25.627 -25.477 -33.560  0.00  0.00           H  
ATOM   1099  H5'  DT A  34     -27.320 -27.039 -33.100  6.00  0.00           H  
ATOM   1100  H71  DT A  34     -32.327 -27.922 -36.060  5.00  0.00           H  
ATOM   1101  H72  DT A  34     -31.419 -28.893 -37.060  3.00  0.00           H  
ATOM   1102  H73  DT A  34     -30.990 -28.501 -35.450  4.00  0.00           H  
ATOM   1103 H2''  DT A  34     -28.197 -22.607 -35.020  1.00  0.00           H  
ATOM   1104 H5''  DT A  34     -27.146 -25.699 -31.790  7.00  0.00           H  
ATOM   1105  P    DT A  35     -25.622 -21.609 -33.400  0.00  0.00           P  
ATOM   1106  C5'  DT A  35     -26.299 -20.022 -35.360  5.00  0.00           C  
ATOM   1107  O5'  DT A  35     -26.654 -20.562 -34.110  6.00  0.00           O  
ATOM   1108  C4'  DT A  35     -27.480 -19.385 -36.160  7.00  0.00           C  
ATOM   1109  O4'  DT A  35     -28.115 -20.451 -36.920  5.00  0.00           O  
ATOM   1110  C3'  DT A  35     -28.450 -18.655 -35.210  9.00  0.00           C  
ATOM   1111  O3'  DT A  35     -28.829 -17.408 -35.650  1.00  0.00           O  
ATOM   1112  C2'  DT A  35     -29.685 -19.523 -35.500  0.00  0.00           C  
ATOM   1113  C1'  DT A  35     -29.459 -20.053 -36.900  1.00  0.00           C  
ATOM   1114  N1   DT A  35     -30.392 -21.221 -37.250  6.00  0.00           N  
ATOM   1115  C2   DT A  35     -30.653 -21.278 -38.660  9.00  0.00           C  
ATOM   1116  O2   DT A  35     -30.052 -20.654 -39.540  4.00  0.00           O  
ATOM   1117  N3   DT A  35     -31.569 -22.180 -39.030  8.00  0.00           N  
ATOM   1118  C4   DT A  35     -32.208 -23.057 -38.240  9.00  0.00           C  
ATOM   1119  O4   DT A  35     -32.976 -23.800 -38.780  8.00  0.00           O  
ATOM   1120  C5   DT A  35     -31.867 -23.016 -36.810  7.00  0.00           C  
ATOM   1121  C6   DT A  35     -31.021 -22.048 -36.350  9.00  0.00           C  
ATOM   1122  C7   DT A  35     -32.495 -23.993 -35.750  4.00  0.00           C  
ATOM   1123  OP1  DT A  35     -24.227 -21.307 -33.740  3.00  0.00           O  
ATOM   1124  OP2  DT A  35     -25.967 -21.644 -31.990  2.00  0.00           O1-
ATOM   1125  H3   DT A  35     -31.751 -22.454 -39.990  7.00  0.00           H  
ATOM   1126  H6   DT A  35     -30.778 -22.010 -35.330  1.00  0.00           H  
ATOM   1127  H1'  DT A  35     -29.658 -19.212 -37.640  3.00  0.00           H  
ATOM   1128  H2'  DT A  35     -29.656 -20.330 -34.720  8.00  0.00           H  
ATOM   1129  H3'  DT A  35     -28.246 -18.807 -34.140  9.00  0.00           H  
ATOM   1130  H4'  DT A  35     -27.033 -18.745 -36.910  7.00  0.00           H  
ATOM   1131  H5'  DT A  35     -25.869 -20.837 -36.010  3.00  0.00           H  
ATOM   1132  H71  DT A  35     -32.128 -23.762 -34.720  2.00  0.00           H  
ATOM   1133  H72  DT A  35     -33.577 -24.013 -35.900  6.00  0.00           H  
ATOM   1134  H73  DT A  35     -32.381 -25.000 -36.050  2.00  0.00           H  
ATOM   1135 H2''  DT A  35     -30.574 -18.987 -35.490  4.00  0.00           H  
ATOM   1136 H5''  DT A  35     -25.560 -19.264 -35.200  5.00  0.00           H  
ATOM   1137  P    DA A  36     -28.288 -16.063 -35.100  3.00  0.00           P  
ATOM   1138  C5'  DA A  36     -27.623 -14.867 -37.360  9.00  0.00           C  
ATOM   1139  O5'  DA A  36     -28.523 -15.010 -36.280  8.00  0.00           O  
ATOM   1140  C4'  DA A  36     -28.256 -14.529 -38.660  4.00  0.00           C  
ATOM   1141  O4'  DA A  36     -28.912 -15.655 -39.160  0.00  0.00           O  
ATOM   1142  C3'  DA A  36     -29.264 -13.394 -38.520  2.00  0.00           C  
ATOM   1143  O3'  DA A  36     -29.251 -12.614 -39.720  7.00  0.00           O  
ATOM   1144  C2'  DA A  36     -30.546 -14.240 -38.390  4.00  0.00           C  
ATOM   1145  C1'  DA A  36     -30.281 -15.374 -39.340  5.00  0.00           C  
ATOM   1146  N1   DA A  36     -33.140 -19.309 -41.070  7.00  0.00           N  
ATOM   1147  C2   DA A  36     -32.388 -18.382 -41.670  9.00  0.00           C  
ATOM   1148  N3   DA A  36     -31.611 -17.476 -41.150  3.00  0.00           N  
ATOM   1149  C4   DA A  36     -31.669 -17.456 -39.800  1.00  0.00           C  
ATOM   1150  C5   DA A  36     -32.439 -18.301 -39.000  6.00  0.00           C  
ATOM   1151  C6   DA A  36     -33.208 -19.291 -39.710  4.00  0.00           C  
ATOM   1152  N6   DA A  36     -33.953 -20.236 -39.130  6.00  0.00           N  
ATOM   1153  N7   DA A  36     -32.138 -18.179 -37.660  4.00  0.00           N  
ATOM   1154  C8   DA A  36     -31.323 -17.120 -37.670  4.00  0.00           C  
ATOM   1155  N9   DA A  36     -31.077 -16.593 -38.920  6.00  0.00           N  
ATOM   1156  OP1  DA A  36     -26.878 -16.178 -34.860  2.00  0.00           O  
ATOM   1157  OP2  DA A  36     -29.118 -15.544 -34.000  3.00  0.00           O1-
ATOM   1158  H2   DA A  36     -32.392 -18.482 -42.750  8.00  0.00           H  
ATOM   1159  H8   DA A  36     -30.855 -16.770 -36.720  9.00  0.00           H  
ATOM   1160  H1'  DA A  36     -30.502 -15.126 -40.330  2.00  0.00           H  
ATOM   1161  H2'  DA A  36     -30.635 -14.477 -37.400  8.00  0.00           H  
ATOM   1162  H3'  DA A  36     -29.165 -12.782 -37.680  7.00  0.00           H  
ATOM   1163  H4'  DA A  36     -27.452 -14.244 -39.380  8.00  0.00           H  
ATOM   1164  H5'  DA A  36     -27.090 -15.860 -37.470  5.00  0.00           H  
ATOM   1165  H61  DA A  36     -34.602 -20.795 -39.700  8.00  0.00           H  
ATOM   1166  H62  DA A  36     -33.905 -20.335 -38.110  4.00  0.00           H  
ATOM   1167 H2''  DA A  36     -31.487 -13.751 -38.820  3.00  0.00           H  
ATOM   1168 H5''  DA A  36     -27.072 -13.990 -37.040  2.00  0.00           H  
ATOM   1169  P    DG A  37     -30.053 -11.330 -39.960  1.00  0.00           P  
ATOM   1170  C5'  DG A  37     -31.591 -12.349 -41.840  6.00  0.00           C  
ATOM   1171  O5'  DG A  37     -31.439 -11.901 -40.470  5.00  0.00           O  
ATOM   1172  C4'  DG A  37     -33.062 -12.822 -42.090  5.00  0.00           C  
ATOM   1173  O4'  DG A  37     -33.145 -14.160 -41.420  6.00  0.00           O  
ATOM   1174  C3'  DG A  37     -34.222 -11.873 -41.610  2.00  0.00           C  
ATOM   1175  O3'  DG A  37     -35.166 -11.684 -42.620  6.00  0.00           O  
ATOM   1176  C2'  DG A  37     -34.814 -12.785 -40.530  7.00  0.00           C  
ATOM   1177  C1'  DG A  37     -34.547 -14.232 -41.000  8.00  0.00           C  
ATOM   1178  N1   DG A  37     -37.291 -18.614 -40.600  1.00  0.00           N  
ATOM   1179  C2   DG A  37     -36.867 -17.965 -41.740  7.00  0.00           C  
ATOM   1180  N2   DG A  37     -37.284 -18.424 -42.910  6.00  0.00           N  
ATOM   1181  N3   DG A  37     -36.040 -16.935 -41.750  6.00  0.00           N  
ATOM   1182  C4   DG A  37     -35.712 -16.480 -40.440  1.00  0.00           C  
ATOM   1183  C5   DG A  37     -36.151 -17.056 -39.260  8.00  0.00           C  
ATOM   1184  C6   DG A  37     -37.007 -18.226 -39.310  0.00  0.00           C  
ATOM   1185  O6   DG A  37     -37.631 -18.821 -38.380  6.00  0.00           O  
ATOM   1186  N7   DG A  37     -35.595 -16.365 -38.190  4.00  0.00           N  
ATOM   1187  C8   DG A  37     -35.084 -15.305 -38.720  5.00  0.00           C  
ATOM   1188  N9   DG A  37     -35.084 -15.288 -40.080  7.00  0.00           N  
ATOM   1189  OP1  DG A  37     -29.467 -10.543 -41.040  8.00  0.00           O  
ATOM   1190  OP2  DG A  37     -30.381 -10.695 -38.670  4.00  0.00           O1-
ATOM   1191  H1   DG A  37     -37.940 -19.368 -40.640  3.00  0.00           H  
ATOM   1192  H8   DG A  37     -34.577 -14.488 -38.160  1.00  0.00           H  
ATOM   1193  H1'  DG A  37     -35.135 -14.400 -41.940  3.00  0.00           H  
ATOM   1194  H2'  DG A  37     -34.219 -12.543 -39.620  2.00  0.00           H  
ATOM   1195  H21  DG A  37     -37.963 -19.192 -43.060  7.00  0.00           H  
ATOM   1196  H3'  DG A  37     -33.938 -10.885 -41.150  8.00  0.00           H  
ATOM   1197  H22  DG A  37     -36.915 -18.035 -43.760  5.00  0.00           H  
ATOM   1198  H4'  DG A  37     -33.223 -13.029 -43.140  3.00  0.00           H  
ATOM   1199  H5'  DG A  37     -30.866 -13.141 -41.880  6.00  0.00           H  
ATOM   1200 H2''  DG A  37     -35.888 -12.632 -40.390  6.00  0.00           H  
ATOM   1201 H5''  DG A  37     -31.393 -11.619 -42.590  0.00  0.00           H  
ATOM   1202  P    DG A  38     -35.727 -10.273 -42.960  3.00  0.00           P  
ATOM   1203  C5'  DG A  38     -35.908 -11.109 -45.470  1.00  0.00           C  
ATOM   1204  O5'  DG A  38     -36.518 -10.560 -44.310  0.00  0.00           O  
ATOM   1205  C4'  DG A  38     -36.653 -12.294 -46.040  3.00  0.00           C  
ATOM   1206  O4'  DG A  38     -36.845 -13.350 -45.080  2.00  0.00           O  
ATOM   1207  C3'  DG A  38     -38.051 -11.947 -46.550  6.00  0.00           C  
ATOM   1208  O3'  DG A  38     -38.393 -12.859 -47.580  5.00  0.00           O  
ATOM   1209  C2'  DG A  38     -38.810 -12.225 -45.250  3.00  0.00           C  
ATOM   1210  C1'  DG A  38     -38.210 -13.487 -44.780  9.00  0.00           C  
ATOM   1211  N1   DG A  38     -39.960 -16.985 -41.580  9.00  0.00           N  
ATOM   1212  C2   DG A  38     -39.920 -16.986 -42.930  9.00  0.00           C  
ATOM   1213  N2   DG A  38     -40.526 -17.967 -43.650  8.00  0.00           N  
ATOM   1214  N3   DG A  38     -39.398 -16.008 -43.690  1.00  0.00           N  
ATOM   1215  C4   DG A  38     -38.957 -14.970 -42.890  7.00  0.00           C  
ATOM   1216  C5   DG A  38     -38.928 -14.922 -41.530  8.00  0.00           C  
ATOM   1217  C6   DG A  38     -39.526 -15.962 -40.790  2.00  0.00           C  
ATOM   1218  O6   DG A  38     -39.716 -16.110 -39.600  8.00  0.00           O  
ATOM   1219  N7   DG A  38     -38.348 -13.666 -41.110  6.00  0.00           N  
ATOM   1220  C8   DG A  38     -38.022 -13.085 -42.240  1.00  0.00           C  
ATOM   1221  N9   DG A  38     -38.300 -13.838 -43.360  0.00  0.00           N  
ATOM   1222  OP1  DG A  38     -34.617  -9.397 -43.300  9.00  0.00           O  
ATOM   1223  OP2  DG A  38     -36.674  -9.837 -41.890  9.00  0.00           O1-
ATOM   1224  H1   DG A  38     -40.572 -17.618 -41.050  9.00  0.00           H  
ATOM   1225  H8   DG A  38     -37.527 -12.152 -42.240  2.00  0.00           H  
ATOM   1226  H1'  DG A  38     -38.670 -14.256 -45.360  5.00  0.00           H  
ATOM   1227  H2'  DG A  38     -38.766 -11.470 -44.500  0.00  0.00           H  
ATOM   1228  H21  DG A  38     -40.820 -18.751 -43.170  5.00  0.00           H  
ATOM   1229  H3'  DG A  38     -38.129 -10.909 -46.820  6.00  0.00           H  
ATOM   1230  H22  DG A  38     -40.479 -17.866 -44.680  4.00  0.00           H  
ATOM   1231  H4'  DG A  38     -35.995 -12.574 -46.890  6.00  0.00           H  
ATOM   1232  H5'  DG A  38     -34.866 -11.454 -45.270  1.00  0.00           H  
ATOM   1233 H2''  DG A  38     -39.843 -12.355 -45.510  8.00  0.00           H  
ATOM   1234 H5''  DG A  38     -35.830 -10.337 -46.220  6.00  0.00           H  
ATOM   1235  P    DG A  39     -39.577 -12.549 -48.580  5.00  0.00           P  
ATOM   1236  C5'  DG A  39     -40.537 -15.040 -49.010  5.00  0.00           C  
ATOM   1237  O5'  DG A  39     -40.668 -13.798 -48.370  0.00  0.00           O  
ATOM   1238  C4'  DG A  39     -41.545 -16.226 -48.780  5.00  0.00           C  
ATOM   1239  O4'  DG A  39     -41.560 -16.505 -47.390  5.00  0.00           O  
ATOM   1240  C3'  DG A  39     -42.969 -15.939 -49.190  8.00  0.00           C  
ATOM   1241  O3'  DG A  39     -43.494 -17.060 -49.740  7.00  0.00           O  
ATOM   1242  C2'  DG A  39     -43.632 -15.455 -47.920  2.00  0.00           C  
ATOM   1243  C1'  DG A  39     -42.885 -16.308 -46.890  9.00  0.00           C  
ATOM   1244  N1   DG A  39     -44.128 -16.135 -41.970  0.00  0.00           N  
ATOM   1245  C2   DG A  39     -44.143 -17.169 -42.800  4.00  0.00           C  
ATOM   1246  N2   DG A  39     -44.792 -18.210 -42.310  0.00  0.00           N  
ATOM   1247  N3   DG A  39     -43.926 -17.093 -44.070  3.00  0.00           N  
ATOM   1248  C4   DG A  39     -43.259 -15.944 -44.370  2.00  0.00           C  
ATOM   1249  C5   DG A  39     -43.050 -14.870 -43.580  5.00  0.00           C  
ATOM   1250  C6   DG A  39     -43.581 -14.923 -42.240  1.00  0.00           C  
ATOM   1251  O6   DG A  39     -43.411 -14.074 -41.330  5.00  0.00           O  
ATOM   1252  N7   DG A  39     -42.349 -13.839 -44.230  4.00  0.00           N  
ATOM   1253  C8   DG A  39     -42.165 -14.290 -45.410  6.00  0.00           C  
ATOM   1254  N9   DG A  39     -42.733 -15.594 -45.640  5.00  0.00           N  
ATOM   1255  OP1  DG A  39     -39.134 -12.694 -49.940  8.00  0.00           O  
ATOM   1256  OP2  DG A  39     -40.299 -11.328 -48.230  0.00  0.00           O1-
ATOM   1257  H1   DG A  39     -44.387 -16.259 -41.010  1.00  0.00           H  
ATOM   1258  H8   DG A  39     -41.699 -13.796 -46.240  2.00  0.00           H  
ATOM   1259  H1'  DG A  39     -43.507 -17.194 -46.750  8.00  0.00           H  
ATOM   1260  H2'  DG A  39     -43.430 -14.411 -47.760  3.00  0.00           H  
ATOM   1261  H21  DG A  39     -45.244 -18.182 -41.370  2.00  0.00           H  
ATOM   1262  H3'  DG A  39     -43.046 -15.157 -49.950  4.00  0.00           H  
ATOM   1263  H22  DG A  39     -45.030 -18.981 -42.950  6.00  0.00           H  
ATOM   1264  H4'  DG A  39     -41.253 -17.084 -49.340  9.00  0.00           H  
ATOM   1265  H5'  DG A  39     -39.590 -15.349 -48.570  8.00  0.00           H  
ATOM   1266 H2''  DG A  39     -44.714 -15.752 -48.040  8.00  0.00           H  
ATOM   1267 H5''  DG A  39     -40.374 -14.837 -50.050  9.00  0.00           H  
ATOM   1268  P    DT A  40     -45.039 -17.190 -50.390  6.00  0.00           P  
ATOM   1269  C5'  DT A  40     -45.641 -18.598 -48.360  7.00  0.00           C  
ATOM   1270  O5'  DT A  40     -45.970 -17.495 -49.120  7.00  0.00           O  
ATOM   1271  C4'  DT A  40     -46.497 -18.900 -47.150  7.00  0.00           C  
ATOM   1272  O4'  DT A  40     -46.167 -18.140 -46.010  0.00  0.00           O  
ATOM   1273  C3'  DT A  40     -48.023 -18.776 -47.370  9.00  0.00           C  
ATOM   1274  O3'  DT A  40     -48.676 -19.929 -46.990  9.00  0.00           O  
ATOM   1275  C2'  DT A  40     -48.418 -17.548 -46.460  0.00  0.00           C  
ATOM   1276  C1'  DT A  40     -47.291 -17.650 -45.400  3.00  0.00           C  
ATOM   1277  N1   DT A  40     -47.118 -16.335 -44.820  1.00  0.00           N  
ATOM   1278  C2   DT A  40     -47.456 -16.117 -43.440  1.00  0.00           C  
ATOM   1279  O2   DT A  40     -47.881 -16.967 -42.670  8.00  0.00           O  
ATOM   1280  N3   DT A  40     -47.163 -14.898 -42.940  0.00  0.00           N  
ATOM   1281  C4   DT A  40     -46.527 -13.867 -43.590  8.00  0.00           C  
ATOM   1282  O4   DT A  40     -46.293 -12.819 -42.960  1.00  0.00           O  
ATOM   1283  C5   DT A  40     -46.226 -14.122 -45.000  9.00  0.00           C  
ATOM   1284  C6   DT A  40     -46.636 -15.296 -45.560  1.00  0.00           C  
ATOM   1285  C7   DT A  40     -45.683 -13.140 -45.960  6.00  0.00           C  
ATOM   1286  OP1  DT A  40     -44.911 -18.359 -51.240  0.00  0.00           O  
ATOM   1287  OP2  DT A  40     -45.403 -15.874 -51.030  7.00  0.00           O1-
ATOM   1288  H3   DT A  40     -47.278 -14.749 -41.980  0.00  0.00           H  
ATOM   1289  H6   DT A  40     -46.472 -15.510 -46.670  8.00  0.00           H  
ATOM   1290  H1'  DT A  40     -47.653 -18.356 -44.540  1.00  0.00           H  
ATOM   1291  H2'  DT A  40     -48.336 -16.571 -47.000  1.00  0.00           H  
ATOM   1292  H3'  DT A  40     -48.206 -18.513 -48.420  6.00  0.00           H  
ATOM   1293  H4'  DT A  40     -46.186 -19.890 -46.890  8.00  0.00           H  
ATOM   1294  H5'  DT A  40     -44.657 -18.557 -48.090  7.00  0.00           H  
ATOM   1295  H71  DT A  40     -45.857 -13.450 -47.090  5.00  0.00           H  
ATOM   1296  H72  DT A  40     -46.183 -12.155 -45.780  9.00  0.00           H  
ATOM   1297  H73  DT A  40     -44.671 -12.960 -45.660  5.00  0.00           H  
ATOM   1298 H2''  DT A  40     -49.378 -17.640 -45.990  8.00  0.00           H  
ATOM   1299 H5''  DT A  40     -45.843 -19.402 -49.120  2.00  0.00           H  
ATOM   1300  P    DT A  41     -50.230 -20.139 -47.230  3.00  0.00           P  
ATOM   1301  C5'  DT A  41     -50.816 -19.909 -44.610  3.00  0.00           C  
ATOM   1302  O5'  DT A  41     -51.003 -19.514 -45.960  8.00  0.00           O  
ATOM   1303  C4'  DT A  41     -51.412 -18.991 -43.490  9.00  0.00           C  
ATOM   1304  O4'  DT A  41     -50.734 -17.703 -43.450  1.00  0.00           O  
ATOM   1305  C3'  DT A  41     -52.879 -18.707 -43.750  3.00  0.00           C  
ATOM   1306  O3'  DT A  41     -53.538 -19.202 -42.620  4.00  0.00           O  
ATOM   1307  C2'  DT A  41     -52.897 -17.136 -43.910  0.00  0.00           C  
ATOM   1308  C1'  DT A  41     -51.641 -16.694 -43.100  2.00  0.00           C  
ATOM   1309  N1   DT A  41     -51.053 -15.416 -43.560  3.00  0.00           N  
ATOM   1310  C2   DT A  41     -50.843 -14.499 -42.530  5.00  0.00           C  
ATOM   1311  O2   DT A  41     -50.904 -14.702 -41.330  2.00  0.00           O  
ATOM   1312  N3   DT A  41     -50.290 -13.350 -42.890  0.00  0.00           N  
ATOM   1313  C4   DT A  41     -49.879 -12.971 -44.150  4.00  0.00           C  
ATOM   1314  O4   DT A  41     -49.237 -11.943 -44.420  0.00  0.00           O  
ATOM   1315  C5   DT A  41     -50.209 -13.946 -45.180  8.00  0.00           C  
ATOM   1316  C6   DT A  41     -50.779 -15.145 -44.870  7.00  0.00           C  
ATOM   1317  C7   DT A  41     -49.814 -13.667 -46.620  2.00  0.00           C  
ATOM   1318  OP1  DT A  41     -50.361 -21.662 -47.110  1.00  0.00           O  
ATOM   1319  OP2  DT A  41     -50.686 -19.486 -48.500  8.00  0.00           O1-
ATOM   1320  H3   DT A  41     -49.915 -12.756 -42.170  7.00  0.00           H  
ATOM   1321  H6   DT A  41     -50.909 -16.002 -45.480  1.00  0.00           H  
ATOM   1322  H1'  DT A  41     -51.783 -16.738 -41.980  8.00  0.00           H  
ATOM   1323  H2'  DT A  41     -52.767 -16.866 -44.960  3.00  0.00           H  
ATOM   1324  H3'  DT A  41     -53.331 -19.211 -44.560  4.00  0.00           H  
ATOM   1325  H4'  DT A  41     -51.301 -19.491 -42.590  2.00  0.00           H  
ATOM   1326  H5'  DT A  41     -49.709 -19.950 -44.370  0.00  0.00           H  
ATOM   1327  H71  DT A  41     -48.794 -13.251 -46.660  2.00  0.00           H  
ATOM   1328  H72  DT A  41     -49.883 -14.598 -47.220  3.00  0.00           H  
ATOM   1329  H73  DT A  41     -50.491 -12.854 -47.040  0.00  0.00           H  
ATOM   1330 H2''  DT A  41     -53.796 -16.590 -43.600  6.00  0.00           H  
ATOM   1331 H5''  DT A  41     -51.246 -20.952 -44.540  1.00  0.00           H  
ATOM   1332  P    DA A  42     -55.078 -18.847 -42.270  2.00  0.00           P  
ATOM   1333  C5'  DA A  42     -54.615 -17.416 -39.990  6.00  0.00           C  
ATOM   1334  O5'  DA A  42     -55.060 -17.510 -41.380  4.00  0.00           O  
ATOM   1335  C4'  DA A  42     -55.117 -16.160 -39.370  1.00  0.00           C  
ATOM   1336  O4'  DA A  42     -54.340 -15.109 -39.740  5.00  0.00           O  
ATOM   1337  C3'  DA A  42     -56.601 -15.951 -39.710  8.00  0.00           C  
ATOM   1338  O3'  DA A  42     -57.324 -15.420 -38.550  5.00  0.00           O  
ATOM   1339  C2'  DA A  42     -56.468 -14.911 -40.810  5.00  0.00           C  
ATOM   1340  C1'  DA A  42     -55.227 -14.152 -40.320  8.00  0.00           C  
ATOM   1341  N1   DA A  42     -52.069 -10.169 -40.810  2.00  0.00           N  
ATOM   1342  C2   DA A  42     -52.790 -10.715 -39.800  6.00  0.00           C  
ATOM   1343  N3   DA A  42     -53.617 -11.738 -39.790  3.00  0.00           N  
ATOM   1344  C4   DA A  42     -53.709 -12.328 -40.970  7.00  0.00           C  
ATOM   1345  C5   DA A  42     -53.114 -11.943 -42.140  8.00  0.00           C  
ATOM   1346  C6   DA A  42     -52.315 -10.707 -41.980  3.00  0.00           C  
ATOM   1347  N6   DA A  42     -51.741 -10.037 -42.990  8.00  0.00           N  
ATOM   1348  N7   DA A  42     -53.529 -12.752 -43.220  4.00  0.00           N  
ATOM   1349  C8   DA A  42     -54.389 -13.616 -42.710  8.00  0.00           C  
ATOM   1350  N9   DA A  42     -54.536 -13.386 -41.330  5.00  0.00           N  
ATOM   1351  OP1  DA A  42     -55.527 -20.010 -41.480  8.00  0.00           O  
ATOM   1352  OP2  DA A  42     -55.768 -18.635 -43.590  6.00  0.00           O1-
ATOM   1353  H2   DA A  42     -52.649 -10.275 -38.790  1.00  0.00           H  
ATOM   1354  H8   DA A  42     -54.886 -14.443 -43.170  4.00  0.00           H  
ATOM   1355  H1'  DA A  42     -55.568 -13.424 -39.570  2.00  0.00           H  
ATOM   1356  H2'  DA A  42     -56.271 -15.517 -41.710  7.00  0.00           H  
ATOM   1357  H3'  DA A  42     -57.163 -16.841 -39.990  5.00  0.00           H  
ATOM   1358  H4'  DA A  42     -55.026 -16.318 -38.300  4.00  0.00           H  
ATOM   1359  H5'  DA A  42     -53.545 -17.586 -39.780  3.00  0.00           H  
ATOM   1360  H61  DA A  42     -51.246  -9.247 -42.700  1.00  0.00           H  
ATOM   1361  H62  DA A  42     -51.692 -10.470 -43.890  0.00  0.00           H  
ATOM   1362 H2''  DA A  42     -57.297 -14.390 -41.050  3.00  0.00           H  
ATOM   1363 H5''  DA A  42     -55.158 -18.237 -39.580  8.00  0.00           H  
ATOM   1364  P    DG A  43     -58.924 -15.485 -38.540  4.00  0.00           P  
ATOM   1365  C5'  DG A  43     -59.812 -13.279 -39.830  8.00  0.00           C  
ATOM   1366  O5'  DG A  43     -59.469 -14.638 -39.790  4.00  0.00           O  
ATOM   1367  C4'  DG A  43     -58.902 -12.210 -39.200  2.00  0.00           C  
ATOM   1368  O4'  DG A  43     -57.586 -12.232 -39.700  9.00  0.00           O  
ATOM   1369  C3'  DG A  43     -59.514 -10.801 -39.370  5.00  0.00           C  
ATOM   1370  O3'  DG A  43     -60.479 -10.465 -38.350  2.00  0.00           O  
ATOM   1371  C2'  DG A  43     -58.244 -10.130 -39.040  3.00  0.00           C  
ATOM   1372  C1'  DG A  43     -57.053 -10.918 -39.670  8.00  0.00           C  
ATOM   1373  N1   DG A  43     -54.746  -7.337 -42.400  8.00  0.00           N  
ATOM   1374  C2   DG A  43     -54.747  -7.571 -41.060  3.00  0.00           C  
ATOM   1375  N2   DG A  43     -54.059  -6.768 -40.270  9.00  0.00           N  
ATOM   1376  N3   DG A  43     -55.457  -8.512 -40.500  1.00  0.00           N  
ATOM   1377  C4   DG A  43     -56.129  -9.333 -41.430  5.00  0.00           C  
ATOM   1378  C5   DG A  43     -55.967  -9.305 -42.770  0.00  0.00           C  
ATOM   1379  C6   DG A  43     -55.382  -8.159 -43.370  6.00  0.00           C  
ATOM   1380  O6   DG A  43     -55.235  -7.948 -44.530  0.00  0.00           O  
ATOM   1381  N7   DG A  43     -56.638 -10.452 -43.350  3.00  0.00           N  
ATOM   1382  C8   DG A  43     -57.198 -11.037 -42.320  7.00  0.00           C  
ATOM   1383  N9   DG A  43     -56.870 -10.429 -41.070  1.00  0.00           N  
ATOM   1384  OP1  DG A  43     -59.424 -14.799 -37.310  5.00  0.00           O  
ATOM   1385  OP2  DG A  43     -59.253 -16.869 -38.850  3.00  0.00           O1-
ATOM   1386  H1   DG A  43     -54.245  -6.571 -42.770  0.00  0.00           H  
ATOM   1387  H8   DG A  43     -57.823 -11.932 -42.390  8.00  0.00           H  
ATOM   1388  H1'  DG A  43     -56.143 -10.893 -39.080  3.00  0.00           H  
ATOM   1389  H2'  DG A  43     -58.387  -9.148 -39.460  4.00  0.00           H  
ATOM   1390  H21  DG A  43     -53.467  -5.965 -40.720  1.00  0.00           H  
ATOM   1391  H3'  DG A  43     -59.891 -10.837 -40.460  5.00  0.00           H  
ATOM   1392  H22  DG A  43     -54.000  -7.020 -39.310  1.00  0.00           H  
ATOM   1393  H4'  DG A  43     -58.855 -12.363 -38.120  3.00  0.00           H  
ATOM   1394  H5'  DG A  43     -60.691 -13.207 -39.220  1.00  0.00           H  
ATOM   1395 H2''  DG A  43     -58.107 -10.077 -37.950  0.00  0.00           H  
ATOM   1396 H5''  DG A  43     -60.009 -12.939 -40.910  4.00  0.00           H  
ATOM   1397  P    DG A  44     -61.392  -9.097 -38.580  1.00  0.00           P  
ATOM   1398  C5'  DG A  44     -59.719  -7.590 -37.130  4.00  0.00           C  
ATOM   1399  O5'  DG A  44     -60.363  -7.850 -38.410  2.00  0.00           O  
ATOM   1400  C4'  DG A  44     -58.783  -6.456 -37.210  8.00  0.00           C  
ATOM   1401  O4'  DG A  44     -57.817  -6.627 -38.330  9.00  0.00           O  
ATOM   1402  C3'  DG A  44     -59.544  -5.126 -37.440  2.00  0.00           C  
ATOM   1403  O3'  DG A  44     -58.848  -4.196 -36.670  9.00  0.00           O  
ATOM   1404  C2'  DG A  44     -59.427  -4.962 -38.940  0.00  0.00           C  
ATOM   1405  C1'  DG A  44     -57.956  -5.507 -39.170  4.00  0.00           C  
ATOM   1406  N1   DG A  44     -56.187  -3.908 -43.590  4.00  0.00           N  
ATOM   1407  C2   DG A  44     -55.992  -3.383 -42.380  8.00  0.00           C  
ATOM   1408  N2   DG A  44     -55.387  -2.241 -42.310  4.00  0.00           N  
ATOM   1409  N3   DG A  44     -56.572  -3.863 -41.260  7.00  0.00           N  
ATOM   1410  C4   DG A  44     -57.284  -4.993 -41.540  4.00  0.00           C  
ATOM   1411  C5   DG A  44     -57.579  -5.636 -42.740  0.00  0.00           C  
ATOM   1412  C6   DG A  44     -57.023  -5.017 -43.900  1.00  0.00           C  
ATOM   1413  O6   DG A  44     -57.236  -5.240 -45.110  8.00  0.00           O  
ATOM   1414  N7   DG A  44     -58.396  -6.755 -42.630  0.00  0.00           N  
ATOM   1415  C8   DG A  44     -58.570  -6.797 -41.320  2.00  0.00           C  
ATOM   1416  N9   DG A  44     -57.910  -5.778 -40.610  5.00  0.00           N  
ATOM   1417  OP1  DG A  44     -62.388  -8.903 -37.480  6.00  0.00           O  
ATOM   1418  OP2  DG A  44     -61.886  -9.211 -39.990  3.00  0.00           O1-
ATOM   1419  H1   DG A  44     -55.791  -3.460 -44.400  7.00  0.00           H  
ATOM   1420  H8   DG A  44     -59.147  -7.601 -40.780  0.00  0.00           H  
ATOM   1421  H1'  DG A  44     -57.150  -4.799 -38.920  2.00  0.00           H  
ATOM   1422  H2'  DG A  44     -60.119  -5.612 -39.480  7.00  0.00           H  
ATOM   1423  H21  DG A  44     -54.970  -1.800 -43.130  2.00  0.00           H  
ATOM   1424  H3'  DG A  44     -60.583  -5.259 -37.150  3.00  0.00           H  
ATOM   1425  H22  DG A  44     -55.507  -1.796 -41.410  1.00  0.00           H  
ATOM   1426  H4'  DG A  44     -58.153  -6.430 -36.250  1.00  0.00           H  
ATOM   1427  H5'  DG A  44     -59.015  -8.349 -37.000  1.00  0.00           H  
ATOM   1428 H2''  DG A  44     -59.563  -3.926 -39.280  5.00  0.00           H  
ATOM   1429 H5''  DG A  44     -60.469  -7.548 -36.340  9.00  0.00           H  
ATOM   1430  P   DG3 A  45     -59.389  -2.775 -36.340  0.00  0.00           P  
ATOM   1431  C5' DG3 A  45     -58.099  -1.376 -38.160  9.00  0.00           C  
ATOM   1432  O5' DG3 A  45     -59.294  -1.948 -37.770  5.00  0.00           O  
ATOM   1433  C4' DG3 A  45     -58.181  -0.579 -39.490  8.00  0.00           C  
ATOM   1434  O4' DG3 A  45     -58.213  -1.426 -40.600  9.00  0.00           O  
ATOM   1435  C3' DG3 A  45     -59.444   0.292 -39.520  2.00  0.00           C  
ATOM   1436  O3' DG3 A  45     -59.147   1.634 -39.930  3.00  0.00           O  
ATOM   1437  C2' DG3 A  45     -60.217  -0.404 -40.630  6.00  0.00           C  
ATOM   1438  C1' DG3 A  45     -59.123  -0.871 -41.570  2.00  0.00           C  
ATOM   1439  N1  DG3 A  45     -58.821  -2.417 -46.510  1.00  0.00           N  
ATOM   1440  C2  DG3 A  45     -58.187  -1.465 -45.840  8.00  0.00           C  
ATOM   1441  N2  DG3 A  45     -57.390  -0.808 -46.570  9.00  0.00           N  
ATOM   1442  N3  DG3 A  45     -58.360  -1.017 -44.520  0.00  0.00           N  
ATOM   1443  C4  DG3 A  45     -59.237  -1.857 -43.940  1.00  0.00           C  
ATOM   1444  C5  DG3 A  45     -59.853  -3.003 -44.460  6.00  0.00           C  
ATOM   1445  C6  DG3 A  45     -59.648  -3.328 -45.870  0.00  0.00           C  
ATOM   1446  O6  DG3 A  45     -59.959  -4.291 -46.550  6.00  0.00           O  
ATOM   1447  N7  DG3 A  45     -60.640  -3.632 -43.460  1.00  0.00           N  
ATOM   1448  C8  DG3 A  45     -60.502  -2.845 -42.460  2.00  0.00           C  
ATOM   1449  N9  DG3 A  45     -59.532  -1.892 -42.590  6.00  0.00           N  
ATOM   1450  OP1 DG3 A  45     -58.402  -2.115 -35.460  7.00  0.00           O  
ATOM   1451  OP2 DG3 A  45     -60.810  -2.811 -36.030  9.00  0.00           O  
ATOM   1452 HO3' DG3 A  45     -59.984   2.091 -39.900  8.00  0.00           H  
ATOM   1453  H1  DG3 A  45     -58.618  -2.623 -47.490  2.00  0.00           H  
ATOM   1454  H8  DG3 A  45     -60.964  -3.016 -41.520  2.00  0.00           H  
ATOM   1455  H1' DG3 A  45     -58.587  -0.092 -42.110  8.00  0.00           H  
ATOM   1456  H2' DG3 A  45     -60.641  -1.273 -40.160  9.00  0.00           H  
ATOM   1457  H21 DG3 A  45     -56.998  -1.079 -47.490  6.00  0.00           H  
ATOM   1458  H3' DG3 A  45     -59.977   0.232 -38.660  0.00  0.00           H  
ATOM   1459  H22 DG3 A  45     -56.810  -0.158 -46.030  3.00  0.00           H  
ATOM   1460  H4' DG3 A  45     -57.223   0.025 -39.480  8.00  0.00           H  
ATOM   1461  H5' DG3 A  45     -57.374  -2.202 -38.220  6.00  0.00           H  
ATOM   1462 H2'' DG3 A  45     -60.974   0.193 -41.040  6.00  0.00           H  
ATOM   1463 H5'' DG3 A  45     -57.733  -0.628 -37.410  5.00  0.00           H  
ATOM   1464  C5' DC5 A  46     -53.943  -2.861 -54.490  3.00  0.00           C  
ATOM   1465  O5' DC5 A  46     -54.962  -3.194 -55.370  4.00  0.00           O  
ATOM   1466  C4' DC5 A  46     -54.105  -1.759 -53.480  7.00  0.00           C  
ATOM   1467  O4' DC5 A  46     -55.365  -1.996 -52.880  7.00  0.00           O  
ATOM   1468  C3' DC5 A  46     -53.031  -1.691 -52.390  8.00  0.00           C  
ATOM   1469  O3' DC5 A  46     -52.643  -0.398 -51.940  4.00  0.00           O  
ATOM   1470  C2' DC5 A  46     -53.630  -2.501 -51.230  1.00  0.00           C  
ATOM   1471  C1' DC5 A  46     -55.129  -2.126 -51.500  7.00  0.00           C  
ATOM   1472  N1  DC5 A  46     -55.986  -3.101 -50.770  0.00  0.00           N  
ATOM   1473  C2  DC5 A  46     -56.536  -2.700 -49.530  4.00  0.00           C  
ATOM   1474  O2  DC5 A  46     -56.319  -1.565 -49.050  4.00  0.00           O  
ATOM   1475  N3  DC5 A  46     -57.379  -3.541 -48.850  6.00  0.00           N  
ATOM   1476  C4  DC5 A  46     -57.583  -4.748 -49.360  0.00  0.00           C  
ATOM   1477  N4  DC5 A  46     -58.397  -5.409 -48.610  0.00  0.00           N  
ATOM   1478  C5  DC5 A  46     -57.172  -5.184 -50.650  7.00  0.00           C  
ATOM   1479  C6  DC5 A  46     -56.385  -4.354 -51.340  0.00  0.00           C  
ATOM   1480 HO5' DC5 A  46     -55.102  -2.479 -56.070  7.00  0.00           H  
ATOM   1481  H5  DC5 A  46     -57.439  -6.147 -51.020  3.00  0.00           H  
ATOM   1482  H6  DC5 A  46     -56.021  -4.649 -52.310  5.00  0.00           H  
ATOM   1483  H1' DC5 A  46     -55.253  -1.133 -51.070  9.00  0.00           H  
ATOM   1484  H2' DC5 A  46     -53.591  -3.577 -51.250  1.00  0.00           H  
ATOM   1485  H3' DC5 A  46     -52.128  -2.209 -52.720  9.00  0.00           H  
ATOM   1486  H4' DC5 A  46     -54.098  -0.761 -53.990  6.00  0.00           H  
ATOM   1487  H41 DC5 A  46     -58.611  -4.918 -47.780  2.00  0.00           H  
ATOM   1488  H5' DC5 A  46     -52.977  -2.652 -54.990  1.00  0.00           H  
ATOM   1489  H42 DC5 A  46     -58.921  -6.235 -48.940  2.00  0.00           H  
ATOM   1490 H2'' DC5 A  46     -53.353  -2.034 -50.260  9.00  0.00           H  
ATOM   1491 H5'' DC5 A  46     -53.682  -3.723 -53.890  9.00  0.00           H  
ATOM   1492  P    DC A  47     -51.153  -0.168 -51.310  6.00  0.00           P  
ATOM   1493  C5'  DC A  47     -51.449   1.606 -49.330  1.00  0.00           C  
ATOM   1494  O5'  DC A  47     -51.443   0.283 -49.850  2.00  0.00           O  
ATOM   1495  C4'  DC A  47     -51.914   1.783 -47.890  6.00  0.00           C  
ATOM   1496  O4'  DC A  47     -53.033   0.985 -47.580  1.00  0.00           O  
ATOM   1497  C3'  DC A  47     -50.872   1.454 -46.770  2.00  0.00           C  
ATOM   1498  O3'  DC A  47     -50.969   2.294 -45.640  3.00  0.00           O  
ATOM   1499  C2'  DC A  47     -51.277   0.080 -46.350  3.00  0.00           C  
ATOM   1500  C1'  DC A  47     -52.749   0.205 -46.480  7.00  0.00           C  
ATOM   1501  N1   DC A  47     -53.409  -1.109 -46.600  9.00  0.00           N  
ATOM   1502  C2   DC A  47     -54.428  -1.471 -45.700  4.00  0.00           C  
ATOM   1503  O2   DC A  47     -54.708  -0.782 -44.750  9.00  0.00           O  
ATOM   1504  N3   DC A  47     -54.918  -2.778 -45.790  2.00  0.00           N  
ATOM   1505  C4   DC A  47     -54.480  -3.628 -46.740  7.00  0.00           C  
ATOM   1506  N4   DC A  47     -55.001  -4.773 -46.790  1.00  0.00           N  
ATOM   1507  C5   DC A  47     -53.624  -3.188 -47.750  7.00  0.00           C  
ATOM   1508  C6   DC A  47     -53.119  -1.937 -47.680  6.00  0.00           C  
ATOM   1509  OP1  DC A  47     -50.484   0.955 -51.980  5.00  0.00           O  
ATOM   1510  OP2  DC A  47     -50.361  -1.381 -51.210  8.00  0.00           O1-
ATOM   1511  H5   DC A  47     -53.247  -3.758 -48.510  4.00  0.00           H  
ATOM   1512  H6   DC A  47     -52.343  -1.648 -48.360  4.00  0.00           H  
ATOM   1513  H1'  DC A  47     -53.181   0.762 -45.610  4.00  0.00           H  
ATOM   1514  H2'  DC A  47     -50.952  -0.601 -47.160  1.00  0.00           H  
ATOM   1515  H3'  DC A  47     -49.873   1.395 -47.200  1.00  0.00           H  
ATOM   1516  H4'  DC A  47     -52.193   2.788 -47.780  9.00  0.00           H  
ATOM   1517  H41  DC A  47     -55.722  -4.977 -46.110  5.00  0.00           H  
ATOM   1518  H5'  DC A  47     -52.060   2.181 -49.980  7.00  0.00           H  
ATOM   1519  H42  DC A  47     -54.495  -5.482 -47.250  6.00  0.00           H  
ATOM   1520 H2''  DC A  47     -50.828  -0.333 -45.450  5.00  0.00           H  
ATOM   1521 H5''  DC A  47     -50.525   2.097 -49.520  4.00  0.00           H  
ATOM   1522  P    DC A  48     -49.790   2.372 -44.500  3.00  0.00           P  
ATOM   1523  C5'  DC A  48     -51.198   1.372 -42.630  8.00  0.00           C  
ATOM   1524  O5'  DC A  48     -50.050   1.297 -43.450  3.00  0.00           O  
ATOM   1525  C4'  DC A  48     -51.576   0.167 -41.810  1.00  0.00           C  
ATOM   1526  O4'  DC A  48     -51.904  -0.866 -42.690  1.00  0.00           O  
ATOM   1527  C3'  DC A  48     -50.326  -0.315 -41.050  3.00  0.00           C  
ATOM   1528  O3'  DC A  48     -50.590  -0.114 -39.660  3.00  0.00           O  
ATOM   1529  C2'  DC A  48     -50.310  -1.809 -41.420  7.00  0.00           C  
ATOM   1530  C1'  DC A  48     -51.719  -2.052 -41.940  7.00  0.00           C  
ATOM   1531  N1   DC A  48     -51.876  -3.163 -42.920  2.00  0.00           N  
ATOM   1532  C2   DC A  48     -52.671  -4.226 -42.490  4.00  0.00           C  
ATOM   1533  O2   DC A  48     -53.101  -4.305 -41.330  5.00  0.00           O  
ATOM   1534  N3   DC A  48     -52.888  -5.202 -43.430  7.00  0.00           N  
ATOM   1535  C4   DC A  48     -52.313  -5.188 -44.560  0.00  0.00           C  
ATOM   1536  N4   DC A  48     -52.685  -6.186 -45.300  4.00  0.00           N  
ATOM   1537  C5   DC A  48     -51.461  -4.150 -45.000  2.00  0.00           C  
ATOM   1538  C6   DC A  48     -51.323  -3.064 -44.160  5.00  0.00           C  
ATOM   1539  OP1  DC A  48     -49.729   3.758 -43.840  0.00  0.00           O  
ATOM   1540  OP2  DC A  48     -48.556   1.889 -45.180  8.00  0.00           O1-
ATOM   1541  H5   DC A  48     -51.160  -4.136 -46.050  1.00  0.00           H  
ATOM   1542  H6   DC A  48     -50.697  -2.136 -44.400  8.00  0.00           H  
ATOM   1543  H1'  DC A  48     -52.386  -2.174 -41.090  7.00  0.00           H  
ATOM   1544  H2'  DC A  48     -49.505  -1.944 -42.200  6.00  0.00           H  
ATOM   1545  H3'  DC A  48     -49.446   0.266 -41.370  5.00  0.00           H  
ATOM   1546  H4'  DC A  48     -52.420   0.441 -41.140  3.00  0.00           H  
ATOM   1547  H41  DC A  48     -53.366  -6.824 -44.950  4.00  0.00           H  
ATOM   1548  H5'  DC A  48     -52.054   1.611 -43.320  0.00  0.00           H  
ATOM   1549  H42  DC A  48     -52.423  -6.160 -46.340  7.00  0.00           H  
ATOM   1550 H2''  DC A  48     -50.091  -2.364 -40.530  8.00  0.00           H  
ATOM   1551 H5''  DC A  48     -51.100   2.285 -42.030  8.00  0.00           H  
ATOM   1552  P    DT A  49     -49.383  -0.335 -38.600  2.00  0.00           P  
ATOM   1553  C5'  DT A  49     -50.737  -1.912 -36.990  1.00  0.00           C  
ATOM   1554  O5'  DT A  49     -49.826  -1.827 -38.150  1.00  0.00           O  
ATOM   1555  C4'  DT A  49     -50.818  -3.250 -36.200  2.00  0.00           C  
ATOM   1556  O4'  DT A  49     -51.242  -4.315 -37.020  5.00  0.00           O  
ATOM   1557  C3'  DT A  49     -49.513  -3.712 -35.540  2.00  0.00           C  
ATOM   1558  O3'  DT A  49     -49.668  -4.214 -34.240  7.00  0.00           O  
ATOM   1559  C2'  DT A  49     -48.947  -4.587 -36.580  3.00  0.00           C  
ATOM   1560  C1'  DT A  49     -50.234  -5.305 -36.990  9.00  0.00           C  
ATOM   1561  N1   DT A  49     -50.232  -5.939 -38.330  1.00  0.00           N  
ATOM   1562  C2   DT A  49     -50.885  -7.192 -38.530  5.00  0.00           C  
ATOM   1563  O2   DT A  49     -51.285  -7.868 -37.620  6.00  0.00           O  
ATOM   1564  N3   DT A  49     -51.031  -7.625 -39.840  5.00  0.00           N  
ATOM   1565  C4   DT A  49     -50.397  -7.058 -40.890  3.00  0.00           C  
ATOM   1566  O4   DT A  49     -50.535  -7.548 -42.020  4.00  0.00           O  
ATOM   1567  C5   DT A  49     -49.673  -5.812 -40.630  6.00  0.00           C  
ATOM   1568  C6   DT A  49     -49.596  -5.318 -39.400  2.00  0.00           C  
ATOM   1569  C7   DT A  49     -49.041  -5.126 -41.750  6.00  0.00           C  
ATOM   1570  OP1  DT A  49     -49.448   0.732 -37.540  2.00  0.00           O  
ATOM   1571  OP2  DT A  49     -48.128  -0.499 -39.370  6.00  0.00           O1-
ATOM   1572  H3   DT A  49     -51.387  -8.539 -40.010  6.00  0.00           H  
ATOM   1573  H6   DT A  49     -49.226  -4.278 -39.240  6.00  0.00           H  
ATOM   1574  H1'  DT A  49     -50.519  -5.998 -36.200  7.00  0.00           H  
ATOM   1575  H2'  DT A  49     -48.658  -3.866 -37.360  7.00  0.00           H  
ATOM   1576  H3'  DT A  49     -48.861  -2.922 -35.410  6.00  0.00           H  
ATOM   1577  H4'  DT A  49     -51.518  -3.091 -35.470  5.00  0.00           H  
ATOM   1578  H5'  DT A  49     -51.721  -1.639 -37.270  9.00  0.00           H  
ATOM   1579  H71  DT A  49     -48.667  -4.139 -41.380  6.00  0.00           H  
ATOM   1580  H72  DT A  49     -48.236  -5.777 -42.120  9.00  0.00           H  
ATOM   1581  H73  DT A  49     -49.762  -5.040 -42.540  0.00  0.00           H  
ATOM   1582 H2''  DT A  49     -48.199  -5.268 -36.350  8.00  0.00           H  
ATOM   1583 H5''  DT A  49     -50.565  -1.201 -36.220  7.00  0.00           H  
ATOM   1584  P    DA A  50     -48.499  -4.906 -33.420  2.00  0.00           P  
ATOM   1585  C5'  DA A  50     -49.330  -7.380 -33.500  0.00  0.00           C  
ATOM   1586  O5'  DA A  50     -48.483  -6.397 -33.990  6.00  0.00           O  
ATOM   1587  C4'  DA A  50     -49.066  -8.676 -34.220  4.00  0.00           C  
ATOM   1588  O4'  DA A  50     -49.135  -8.534 -35.590  6.00  0.00           O  
ATOM   1589  C3'  DA A  50     -47.615  -9.194 -33.970  0.00  0.00           C  
ATOM   1590  O3'  DA A  50     -47.620 -10.549 -33.580  8.00  0.00           O  
ATOM   1591  C2'  DA A  50     -46.981  -9.193 -35.330  5.00  0.00           C  
ATOM   1592  C1'  DA A  50     -48.265  -9.469 -36.140  3.00  0.00           C  
ATOM   1593  N1   DA A  50     -49.357 -11.745 -40.560  1.00  0.00           N  
ATOM   1594  C2   DA A  50     -49.772 -11.962 -39.300  3.00  0.00           C  
ATOM   1595  N3   DA A  50     -49.660 -11.151 -38.240  6.00  0.00           N  
ATOM   1596  C4   DA A  50     -48.781 -10.116 -38.530  4.00  0.00           C  
ATOM   1597  C5   DA A  50     -48.315  -9.769 -39.740  9.00  0.00           C  
ATOM   1598  C6   DA A  50     -48.737 -10.594 -40.850  0.00  0.00           C  
ATOM   1599  N6   DA A  50     -48.522 -10.271 -42.100  7.00  0.00           N  
ATOM   1600  N7   DA A  50     -47.492  -8.606 -39.660  1.00  0.00           N  
ATOM   1601  C8   DA A  50     -47.376  -8.458 -38.380  5.00  0.00           C  
ATOM   1602  N9   DA A  50     -48.120  -9.332 -37.650  3.00  0.00           N  
ATOM   1603  OP1  DA A  50     -48.933  -4.964 -32.010  2.00  0.00           O  
ATOM   1604  OP2  DA A  50     -47.238  -4.293 -33.720  0.00  0.00           O1-
ATOM   1605  H2   DA A  50     -50.448 -12.778 -39.110  5.00  0.00           H  
ATOM   1606  H8   DA A  50     -46.714  -7.745 -37.900  8.00  0.00           H  
ATOM   1607  H1'  DA A  50     -48.562 -10.488 -35.940  4.00  0.00           H  
ATOM   1608  H2'  DA A  50     -46.533  -8.262 -35.500  6.00  0.00           H  
ATOM   1609  H3'  DA A  50     -47.070  -8.585 -33.390  5.00  0.00           H  
ATOM   1610  H4'  DA A  50     -49.749  -9.439 -33.900  1.00  0.00           H  
ATOM   1611  H5'  DA A  50     -50.307  -7.043 -33.810  5.00  0.00           H  
ATOM   1612  H61  DA A  50     -49.003 -10.817 -42.830  5.00  0.00           H  
ATOM   1613  H62  DA A  50     -48.173  -9.365 -42.310  3.00  0.00           H  
ATOM   1614 H2''  DA A  50     -46.250  -9.965 -35.540  0.00  0.00           H  
ATOM   1615 H5''  DA A  50     -49.269  -7.527 -32.400  4.00  0.00           H  
ATOM   1616  P    DA A  51     -47.938 -10.958 -32.130  8.00  0.00           P  
ATOM   1617  C5'  DA A  51     -49.698 -12.671 -33.050  7.00  0.00           C  
ATOM   1618  O5'  DA A  51     -48.467 -12.424 -32.340  8.00  0.00           O  
ATOM   1619  C4'  DA A  51     -50.044 -14.131 -33.570  6.00  0.00           C  
ATOM   1620  O4'  DA A  51     -49.973 -14.126 -34.990  2.00  0.00           O  
ATOM   1621  C3'  DA A  51     -49.005 -15.206 -33.130  0.00  0.00           C  
ATOM   1622  O3'  DA A  51     -49.720 -16.441 -33.000  8.00  0.00           O  
ATOM   1623  C2'  DA A  51     -47.977 -15.145 -34.160  6.00  0.00           C  
ATOM   1624  C1'  DA A  51     -48.843 -14.873 -35.420  9.00  0.00           C  
ATOM   1625  N1   DA A  51     -47.280 -14.307 -40.230  8.00  0.00           N  
ATOM   1626  C2   DA A  51     -47.999 -15.242 -39.640  4.00  0.00           C  
ATOM   1627  N3   DA A  51     -48.157 -15.399 -38.360  6.00  0.00           N  
ATOM   1628  C4   DA A  51     -47.721 -14.342 -37.580  6.00  0.00           C  
ATOM   1629  C5   DA A  51     -47.042 -13.292 -38.010  1.00  0.00           C  
ATOM   1630  C6   DA A  51     -46.742 -13.343 -39.420  8.00  0.00           C  
ATOM   1631  N6   DA A  51     -46.059 -12.427 -40.060  5.00  0.00           N  
ATOM   1632  N7   DA A  51     -46.702 -12.380 -37.020  7.00  0.00           N  
ATOM   1633  C8   DA A  51     -47.342 -12.898 -35.970  7.00  0.00           C  
ATOM   1634  N9   DA A  51     -47.942 -14.101 -36.240  5.00  0.00           N  
ATOM   1635  OP1  DA A  51     -49.012 -10.125 -31.450  2.00  0.00           O  
ATOM   1636  OP2  DA A  51     -46.653 -11.050 -31.470  4.00  0.00           O1-
ATOM   1637  H2   DA A  51     -48.380 -16.034 -40.320  8.00  0.00           H  
ATOM   1638  H8   DA A  51     -47.323 -12.515 -34.970  1.00  0.00           H  
ATOM   1639  H1'  DA A  51     -49.070 -15.791 -35.920  2.00  0.00           H  
ATOM   1640  H2'  DA A  51     -47.315 -14.336 -34.010  2.00  0.00           H  
ATOM   1641  H3'  DA A  51     -48.561 -14.988 -32.170  6.00  0.00           H  
ATOM   1642  H4'  DA A  51     -50.988 -14.410 -33.070  1.00  0.00           H  
ATOM   1643  H5'  DA A  51     -49.679 -12.049 -33.950  8.00  0.00           H  
ATOM   1644  H61  DA A  51     -45.939 -12.492 -41.080  5.00  0.00           H  
ATOM   1645  H62  DA A  51     -45.644 -11.717 -39.480  7.00  0.00           H  
ATOM   1646 H2''  DA A  51     -47.424 -16.053 -34.360  9.00  0.00           H  
ATOM   1647 H5''  DA A  51     -50.631 -12.308 -32.510  1.00  0.00           H  
ATOM   1648  P    DC A  52     -48.980 -17.772 -32.430  9.00  0.00           P  
ATOM   1649  C5'  DC A  52     -49.327 -18.923 -34.730  8.00  0.00           C  
ATOM   1650  O5'  DC A  52     -48.437 -18.464 -33.790  3.00  0.00           O  
ATOM   1651  C4'  DC A  52     -48.764 -19.397 -36.060  8.00  0.00           C  
ATOM   1652  O4'  DC A  52     -48.075 -18.269 -36.680  3.00  0.00           O  
ATOM   1653  C3'  DC A  52     -47.671 -20.541 -35.940  8.00  0.00           C  
ATOM   1654  O3'  DC A  52     -47.909 -21.628 -36.770  0.00  0.00           O  
ATOM   1655  C2'  DC A  52     -46.368 -19.778 -36.240  6.00  0.00           C  
ATOM   1656  C1'  DC A  52     -46.846 -18.698 -37.160  5.00  0.00           C  
ATOM   1657  N1   DC A  52     -45.889 -17.591 -37.460  2.00  0.00           N  
ATOM   1658  C2   DC A  52     -45.513 -17.360 -38.750  2.00  0.00           C  
ATOM   1659  O2   DC A  52     -45.799 -18.131 -39.660  6.00  0.00           O  
ATOM   1660  N3   DC A  52     -44.733 -16.315 -39.060  7.00  0.00           N  
ATOM   1661  C4   DC A  52     -44.287 -15.544 -38.090  3.00  0.00           C  
ATOM   1662  N4   DC A  52     -43.585 -14.469 -38.420  9.00  0.00           N  
ATOM   1663  C5   DC A  52     -44.666 -15.725 -36.740  0.00  0.00           C  
ATOM   1664  C6   DC A  52     -45.487 -16.783 -36.430  3.00  0.00           C  
ATOM   1665  OP1  DC A  52     -50.071 -18.561 -31.730  6.00  0.00           O  
ATOM   1666  OP2  DC A  52     -47.814 -17.433 -31.590  0.00  0.00           O1-
ATOM   1667  H5   DC A  52     -44.299 -14.988 -36.070  0.00  0.00           H  
ATOM   1668  H6   DC A  52     -45.911 -17.020 -35.480  0.00  0.00           H  
ATOM   1669  H1'  DC A  52     -47.183 -19.153 -38.090  3.00  0.00           H  
ATOM   1670  H2'  DC A  52     -45.946 -19.306 -35.400  5.00  0.00           H  
ATOM   1671  H3'  DC A  52     -47.600 -20.970 -34.870  0.00  0.00           H  
ATOM   1672  H4'  DC A  52     -49.677 -19.653 -36.710  5.00  0.00           H  
ATOM   1673  H41  DC A  52     -43.443 -14.196 -39.350  8.00  0.00           H  
ATOM   1674  H5'  DC A  52     -50.013 -18.166 -35.160  6.00  0.00           H  
ATOM   1675  H42  DC A  52     -43.543 -13.792 -37.720  8.00  0.00           H  
ATOM   1676 H2''  DC A  52     -45.678 -20.417 -36.740  5.00  0.00           H  
ATOM   1677 H5''  DC A  52     -49.849 -19.831 -34.340  2.00  0.00           H  
ATOM   1678  P    DC A  53     -46.836 -22.878 -36.870  4.00  0.00           P  
ATOM   1679  C5'  DC A  53     -47.049 -22.485 -39.490  8.00  0.00           C  
ATOM   1680  O5'  DC A  53     -46.228 -22.408 -38.290  4.00  0.00           O  
ATOM   1681  C4'  DC A  53     -46.285 -22.353 -40.830  3.00  0.00           C  
ATOM   1682  O4'  DC A  53     -45.529 -21.190 -41.130  0.00  0.00           O  
ATOM   1683  C3'  DC A  53     -45.389 -23.567 -41.050  1.00  0.00           C  
ATOM   1684  O3'  DC A  53     -45.554 -24.038 -42.430  8.00  0.00           O  
ATOM   1685  C2'  DC A  53     -44.065 -22.986 -40.790  5.00  0.00           C  
ATOM   1686  C1'  DC A  53     -44.103 -21.478 -41.200  5.00  0.00           C  
ATOM   1687  N1   DC A  53     -43.344 -20.583 -40.360  4.00  0.00           N  
ATOM   1688  C2   DC A  53     -42.310 -19.804 -40.950  1.00  0.00           C  
ATOM   1689  O2   DC A  53     -42.049 -19.856 -42.180  2.00  0.00           O  
ATOM   1690  N3   DC A  53     -41.635 -18.931 -40.200  0.00  0.00           N  
ATOM   1691  C4   DC A  53     -41.849 -18.905 -38.900  9.00  0.00           C  
ATOM   1692  N4   DC A  53     -41.056 -18.150 -38.220  0.00  0.00           N  
ATOM   1693  C5   DC A  53     -42.844 -19.698 -38.310  3.00  0.00           C  
ATOM   1694  C6   DC A  53     -43.587 -20.541 -39.040  0.00  0.00           C  
ATOM   1695  OP1  DC A  53     -47.571 -24.152 -37.050  4.00  0.00           O  
ATOM   1696  OP2  DC A  53     -45.914 -22.732 -35.720  6.00  0.00           O1-
ATOM   1697  H5   DC A  53     -43.060 -19.669 -37.190  7.00  0.00           H  
ATOM   1698  H6   DC A  53     -44.302 -21.238 -38.540  3.00  0.00           H  
ATOM   1699  H1'  DC A  53     -43.810 -21.468 -42.230  2.00  0.00           H  
ATOM   1700  H2'  DC A  53     -43.775 -23.063 -39.750  9.00  0.00           H  
ATOM   1701  H3'  DC A  53     -45.714 -24.344 -40.360  5.00  0.00           H  
ATOM   1702  H4'  DC A  53     -47.076 -22.424 -41.510  1.00  0.00           H  
ATOM   1703  H41  DC A  53     -40.456 -17.557 -38.710  8.00  0.00           H  
ATOM   1704  H5'  DC A  53     -47.676 -21.595 -39.480  8.00  0.00           H  
ATOM   1705  H42  DC A  53     -41.264 -18.091 -37.220  1.00  0.00           H  
ATOM   1706 H2''  DC A  53     -43.423 -23.611 -41.440  5.00  0.00           H  
ATOM   1707 H5''  DC A  53     -47.707 -23.397 -39.610  8.00  0.00           H  
ATOM   1708  P    DC A  54     -45.053 -25.412 -43.000  0.00  0.00           P  
ATOM   1709  C5'  DC A  54     -43.467 -24.425 -44.680  7.00  0.00           C  
ATOM   1710  O5'  DC A  54     -43.557 -25.022 -43.400  0.00  0.00           O  
ATOM   1711  C4'  DC A  54     -41.996 -23.855 -45.020  8.00  0.00           C  
ATOM   1712  O4'  DC A  54     -41.669 -23.062 -43.980  9.00  0.00           O  
ATOM   1713  C3'  DC A  54     -40.881 -24.874 -45.110  3.00  0.00           C  
ATOM   1714  O3'  DC A  54     -40.495 -25.022 -46.460  1.00  0.00           O  
ATOM   1715  C2'  DC A  54     -39.789 -24.355 -44.110  5.00  0.00           C  
ATOM   1716  C1'  DC A  54     -40.325 -22.955 -43.780  0.00  0.00           C  
ATOM   1717  N1   DC A  54     -40.084 -22.517 -42.370  7.00  0.00           N  
ATOM   1718  C2   DC A  54     -39.256 -21.431 -42.110  2.00  0.00           C  
ATOM   1719  O2   DC A  54     -38.643 -20.875 -43.040  3.00  0.00           O  
ATOM   1720  N3   DC A  54     -39.038 -21.008 -40.820  9.00  0.00           N  
ATOM   1721  C4   DC A  54     -39.519 -21.730 -39.810  5.00  0.00           C  
ATOM   1722  N4   DC A  54     -39.143 -21.347 -38.600  1.00  0.00           N  
ATOM   1723  C5   DC A  54     -40.283 -22.931 -40.070  1.00  0.00           C  
ATOM   1724  C6   DC A  54     -40.560 -23.294 -41.350  7.00  0.00           C  
ATOM   1725  OP1  DC A  54     -45.882 -25.670 -44.200  6.00  0.00           O  
ATOM   1726  OP2  DC A  54     -44.963 -26.429 -41.910  0.00  0.00           O1-
ATOM   1727  H5   DC A  54     -40.697 -23.458 -39.220  6.00  0.00           H  
ATOM   1728  H6   DC A  54     -41.174 -24.184 -41.490  9.00  0.00           H  
ATOM   1729  H1'  DC A  54     -39.809 -22.261 -44.500  7.00  0.00           H  
ATOM   1730  H2'  DC A  54     -39.658 -25.041 -43.310  7.00  0.00           H  
ATOM   1731  H3'  DC A  54     -41.344 -25.780 -44.740  1.00  0.00           H  
ATOM   1732  H4'  DC A  54     -41.905 -23.348 -45.960  0.00  0.00           H  
ATOM   1733  H41  DC A  54     -38.815 -20.362 -38.610  1.00  0.00           H  
ATOM   1734  H5'  DC A  54     -44.223 -23.674 -44.720  7.00  0.00           H  
ATOM   1735  H42  DC A  54     -39.305 -21.999 -37.800  6.00  0.00           H  
ATOM   1736 H2''  DC A  54     -38.843 -24.199 -44.600  0.00  0.00           H  
ATOM   1737 H5''  DC A  54     -43.638 -25.144 -45.450  4.00  0.00           H  
ATOM   1738  P    DT A  55     -39.154 -25.758 -47.060  6.00  0.00           P  
ATOM   1739  C5'  DT A  55     -38.085 -23.555 -48.000  7.00  0.00           C  
ATOM   1740  O5'  DT A  55     -37.949 -24.676 -47.090  3.00  0.00           O  
ATOM   1741  C4'  DT A  55     -36.904 -22.622 -47.800  6.00  0.00           C  
ATOM   1742  O4'  DT A  55     -36.770 -22.198 -46.490  8.00  0.00           O  
ATOM   1743  C3'  DT A  55     -35.659 -23.393 -48.290  1.00  0.00           C  
ATOM   1744  O3'  DT A  55     -35.158 -22.644 -49.410  6.00  0.00           O  
ATOM   1745  C2'  DT A  55     -34.782 -23.288 -47.110  2.00  0.00           C  
ATOM   1746  C1'  DT A  55     -35.385 -22.147 -46.200  0.00  0.00           C  
ATOM   1747  N1   DT A  55     -35.251 -22.287 -44.680  5.00  0.00           N  
ATOM   1748  C2   DT A  55     -34.648 -21.293 -43.980  1.00  0.00           C  
ATOM   1749  O2   DT A  55     -33.857 -20.504 -44.530  4.00  0.00           O  
ATOM   1750  N3   DT A  55     -34.697 -21.333 -42.620  5.00  0.00           N  
ATOM   1751  C4   DT A  55     -35.359 -22.232 -41.860  8.00  0.00           C  
ATOM   1752  O4   DT A  55     -35.557 -22.129 -40.660  7.00  0.00           O  
ATOM   1753  C5   DT A  55     -35.942 -23.310 -42.620  8.00  0.00           C  
ATOM   1754  C6   DT A  55     -35.948 -23.342 -43.990  6.00  0.00           C  
ATOM   1755  C7   DT A  55     -36.578 -24.497 -41.880  7.00  0.00           C  
ATOM   1756  OP1  DT A  55     -39.328 -26.165 -48.480  7.00  0.00           O  
ATOM   1757  OP2  DT A  55     -38.825 -26.745 -46.040  9.00  0.00           O1-
ATOM   1758  H3   DT A  55     -33.970 -20.759 -42.210  6.00  0.00           H  
ATOM   1759  H6   DT A  55     -36.382 -24.155 -44.570  1.00  0.00           H  
ATOM   1760  H1'  DT A  55     -35.009 -21.142 -46.440  6.00  0.00           H  
ATOM   1761  H2'  DT A  55     -34.835 -24.160 -46.570  9.00  0.00           H  
ATOM   1762  H3'  DT A  55     -35.830 -24.442 -48.460  6.00  0.00           H  
ATOM   1763  H4'  DT A  55     -37.046 -21.711 -48.420  8.00  0.00           H  
ATOM   1764  H5'  DT A  55     -39.015 -23.112 -47.680  1.00  0.00           H  
ATOM   1765  H71  DT A  55     -37.219 -25.084 -42.560  6.00  0.00           H  
ATOM   1766  H72  DT A  55     -35.786 -25.140 -41.550  6.00  0.00           H  
ATOM   1767  H73  DT A  55     -37.246 -24.227 -41.070  6.00  0.00           H  
ATOM   1768 H2''  DT A  55     -33.711 -23.047 -47.480  8.00  0.00           H  
ATOM   1769 H5''  DT A  55     -38.126 -24.000 -48.990  3.00  0.00           H  
ATOM   1770  P    DA A  56     -33.993 -23.132 -50.400  3.00  0.00           P  
ATOM   1771  C5'  DA A  56     -32.598 -21.249 -49.310  6.00  0.00           C  
ATOM   1772  O5'  DA A  56     -32.759 -22.654 -49.620  5.00  0.00           O  
ATOM   1773  C4'  DA A  56     -31.291 -21.034 -48.440  1.00  0.00           C  
ATOM   1774  O4'  DA A  56     -31.593 -21.481 -47.130  2.00  0.00           O  
ATOM   1775  C3'  DA A  56     -30.089 -21.857 -48.910  5.00  0.00           C  
ATOM   1776  O3'  DA A  56     -28.813 -21.252 -48.630  9.00  0.00           O  
ATOM   1777  C2'  DA A  56     -30.166 -23.053 -47.960  4.00  0.00           C  
ATOM   1778  C1'  DA A  56     -30.580 -22.299 -46.700  1.00  0.00           C  
ATOM   1779  N1   DA A  56     -31.899 -22.653 -41.660  6.00  0.00           N  
ATOM   1780  C2   DA A  56     -31.304 -21.737 -42.370  1.00  0.00           C  
ATOM   1781  N3   DA A  56     -30.960 -21.716 -43.630  5.00  0.00           N  
ATOM   1782  C4   DA A  56     -31.387 -22.819 -44.340  2.00  0.00           C  
ATOM   1783  C5   DA A  56     -32.023 -23.870 -43.780  3.00  0.00           C  
ATOM   1784  C6   DA A  56     -32.269 -23.756 -42.370  6.00  0.00           C  
ATOM   1785  N6   DA A  56     -32.909 -24.663 -41.710  1.00  0.00           N  
ATOM   1786  N7   DA A  56     -32.313 -24.780 -44.790  6.00  0.00           N  
ATOM   1787  C8   DA A  56     -31.798 -24.353 -45.880  0.00  0.00           C  
ATOM   1788  N9   DA A  56     -31.194 -23.107 -45.680  9.00  0.00           N  
ATOM   1789  OP1  DA A  56     -34.126 -22.340 -51.610  9.00  0.00           O  
ATOM   1790  OP2  DA A  56     -34.055 -24.578 -50.360  5.00  0.00           O1-
ATOM   1791  H2   DA A  56     -31.146 -20.906 -41.790  7.00  0.00           H  
ATOM   1792  H8   DA A  56     -31.864 -24.870 -46.770  4.00  0.00           H  
ATOM   1793  H1'  DA A  56     -29.639 -21.784 -46.320  8.00  0.00           H  
ATOM   1794  H2'  DA A  56     -31.011 -23.678 -48.260  4.00  0.00           H  
ATOM   1795  H3'  DA A  56     -30.280 -22.230 -49.950  2.00  0.00           H  
ATOM   1796  H4'  DA A  56     -31.029 -19.985 -48.350  9.00  0.00           H  
ATOM   1797  H5'  DA A  56     -33.477 -20.920 -48.700  0.00  0.00           H  
ATOM   1798  H61  DA A  56     -33.213 -24.357 -40.770  0.00  0.00           H  
ATOM   1799  H62  DA A  56     -33.150 -25.546 -42.100  4.00  0.00           H  
ATOM   1800 H2''  DA A  56     -29.380 -23.799 -47.810  4.00  0.00           H  
ATOM   1801 H5''  DA A  56     -32.613 -20.682 -50.250  8.00  0.00           H  
ATOM   1802  P    DA A  57     -27.442 -21.551 -49.460  7.00  0.00           P  
ATOM   1803  C5'  DA A  57     -26.451 -19.105 -49.400  4.00  0.00           C  
ATOM   1804  O5'  DA A  57     -26.372 -20.514 -48.970  8.00  0.00           O  
ATOM   1805  C4'  DA A  57     -25.712 -18.048 -48.530  4.00  0.00           C  
ATOM   1806  O4'  DA A  57     -26.486 -17.681 -47.410  6.00  0.00           O  
ATOM   1807  C3'  DA A  57     -24.337 -18.533 -48.110  0.00  0.00           C  
ATOM   1808  O3'  DA A  57     -23.403 -17.470 -48.240  7.00  0.00           O  
ATOM   1809  C2'  DA A  57     -24.645 -18.746 -46.600  9.00  0.00           C  
ATOM   1810  C1'  DA A  57     -25.584 -17.506 -46.380  7.00  0.00           C  
ATOM   1811  N1   DA A  57     -27.155 -20.333 -42.230  2.00  0.00           N  
ATOM   1812  C2   DA A  57     -26.265 -20.589 -43.190  4.00  0.00           C  
ATOM   1813  N3   DA A  57     -25.893 -19.888 -44.230  9.00  0.00           N  
ATOM   1814  C4   DA A  57     -26.394 -18.592 -44.160  9.00  0.00           C  
ATOM   1815  C5   DA A  57     -27.301 -18.119 -43.220  8.00  0.00           C  
ATOM   1816  C6   DA A  57     -27.696 -19.133 -42.320  0.00  0.00           C  
ATOM   1817  N6   DA A  57     -28.646 -18.958 -41.460  7.00  0.00           N  
ATOM   1818  N7   DA A  57     -27.606 -16.789 -43.440  4.00  0.00           N  
ATOM   1819  C8   DA A  57     -27.011 -16.511 -44.620  1.00  0.00           C  
ATOM   1820  N9   DA A  57     -26.318 -17.613 -45.140  3.00  0.00           N  
ATOM   1821  OP1  DA A  57     -27.788 -21.277 -50.830  3.00  0.00           O  
ATOM   1822  OP2  DA A  57     -26.915 -22.903 -49.180  4.00  0.00           O1-
ATOM   1823  H2   DA A  57     -25.779 -21.571 -43.290  1.00  0.00           H  
ATOM   1824  H8   DA A  57     -26.882 -15.513 -45.070  6.00  0.00           H  
ATOM   1825  H1'  DA A  57     -24.914 -16.643 -46.510  8.00  0.00           H  
ATOM   1826  H2'  DA A  57     -25.225 -19.667 -46.410  8.00  0.00           H  
ATOM   1827  H3'  DA A  57     -24.123 -19.439 -48.740  7.00  0.00           H  
ATOM   1828  H4'  DA A  57     -25.592 -17.200 -49.120  9.00  0.00           H  
ATOM   1829  H5'  DA A  57     -27.491 -18.876 -49.510  1.00  0.00           H  
ATOM   1830  H61  DA A  57     -29.038 -19.684 -40.840  0.00  0.00           H  
ATOM   1831  H62  DA A  57     -29.182 -18.087 -41.540  5.00  0.00           H  
ATOM   1832 H2''  DA A  57     -23.820 -18.623 -45.960  8.00  0.00           H  
ATOM   1833 H5''  DA A  57     -26.025 -19.071 -50.380  2.00  0.00           H  
ATOM   1834  P    DC A  58     -21.808 -17.726 -48.010  4.00  0.00           P  
ATOM   1835  C5'  DC A  58     -21.781 -16.299 -45.850  1.00  0.00           C  
ATOM   1836  O5'  DC A  58     -21.464 -17.540 -46.510  7.00  0.00           O  
ATOM   1837  C4'  DC A  58     -21.356 -16.198 -44.370  6.00  0.00           C  
ATOM   1838  O4'  DC A  58     -22.166 -15.155 -43.920  1.00  0.00           O  
ATOM   1839  C3'  DC A  58     -21.670 -17.407 -43.500  1.00  0.00           C  
ATOM   1840  O3'  DC A  58     -20.793 -17.478 -42.330  6.00  0.00           O  
ATOM   1841  C2'  DC A  58     -23.160 -17.159 -43.250  7.00  0.00           C  
ATOM   1842  C1'  DC A  58     -23.010 -15.628 -42.900  8.00  0.00           C  
ATOM   1843  N1   DC A  58     -24.260 -14.883 -42.880  5.00  0.00           N  
ATOM   1844  C2   DC A  58     -24.969 -14.786 -41.660  3.00  0.00           C  
ATOM   1845  O2   DC A  58     -24.801 -15.557 -40.730  7.00  0.00           O  
ATOM   1846  N3   DC A  58     -25.917 -13.873 -41.620  0.00  0.00           N  
ATOM   1847  C4   DC A  58     -26.242 -13.059 -42.600  9.00  0.00           C  
ATOM   1848  N4   DC A  58     -27.325 -12.359 -42.420  1.00  0.00           N  
ATOM   1849  C5   DC A  58     -25.616 -13.204 -43.850  7.00  0.00           C  
ATOM   1850  C6   DC A  58     -24.600 -14.107 -43.980  5.00  0.00           C  
ATOM   1851  OP1  DC A  58     -21.055 -16.738 -48.720  7.00  0.00           O  
ATOM   1852  OP2  DC A  58     -21.633 -19.173 -48.300  9.00  0.00           O1-
ATOM   1853  H5   DC A  58     -25.679 -12.483 -44.700  9.00  0.00           H  
ATOM   1854  H6   DC A  58     -24.061 -14.211 -44.890  6.00  0.00           H  
ATOM   1855  H1'  DC A  58     -22.420 -15.433 -42.010  8.00  0.00           H  
ATOM   1856  H2'  DC A  58     -23.729 -17.370 -44.130  1.00  0.00           H  
ATOM   1857  H3'  DC A  58     -21.523 -18.356 -44.120  6.00  0.00           H  
ATOM   1858  H4'  DC A  58     -20.330 -15.876 -44.110  1.00  0.00           H  
ATOM   1859  H41  DC A  58     -27.719 -12.242 -41.460  8.00  0.00           H  
ATOM   1860  H5'  DC A  58     -22.860 -16.110 -45.990  4.00  0.00           H  
ATOM   1861  H42  DC A  58     -27.597 -11.754 -43.200  0.00  0.00           H  
ATOM   1862 H2''  DC A  58     -23.514 -17.733 -42.440  2.00  0.00           H  
ATOM   1863 H5''  DC A  58     -21.328 -15.486 -46.310  9.00  0.00           H  
ATOM   1864  P    DC A  59     -19.828 -18.717 -42.050  6.00  0.00           P  
ATOM   1865  C5'  DC A  59     -21.946 -20.319 -41.920  0.00  0.00           C  
ATOM   1866  O5'  DC A  59     -20.769 -19.843 -41.300  8.00  0.00           O  
ATOM   1867  C4'  DC A  59     -22.047 -21.813 -41.540  7.00  0.00           C  
ATOM   1868  O4'  DC A  59     -23.269 -22.297 -41.940  3.00  0.00           O  
ATOM   1869  C3'  DC A  59     -20.909 -22.649 -42.070  0.00  0.00           C  
ATOM   1870  O3'  DC A  59     -20.421 -23.699 -41.130  2.00  0.00           O  
ATOM   1871  C2'  DC A  59     -21.579 -23.326 -43.270  3.00  0.00           C  
ATOM   1872  C1'  DC A  59     -23.025 -23.455 -42.740  1.00  0.00           C  
ATOM   1873  N1   DC A  59     -24.006 -23.594 -43.880  4.00  0.00           N  
ATOM   1874  C2   DC A  59     -24.479 -24.833 -44.130  0.00  0.00           C  
ATOM   1875  O2   DC A  59     -24.257 -25.797 -43.360  9.00  0.00           O  
ATOM   1876  N3   DC A  59     -25.138 -25.124 -45.270  2.00  0.00           N  
ATOM   1877  C4   DC A  59     -25.340 -24.172 -46.140  5.00  0.00           C  
ATOM   1878  N4   DC A  59     -25.924 -24.550 -47.190  8.00  0.00           N  
ATOM   1879  C5   DC A  59     -24.970 -22.802 -45.900  6.00  0.00           C  
ATOM   1880  C6   DC A  59     -24.284 -22.515 -44.760  6.00  0.00           C  
ATOM   1881  OP1  DC A  59     -18.801 -18.223 -41.100  4.00  0.00           O  
ATOM   1882  OP2  DC A  59     -19.316 -19.222 -43.370  1.00  0.00           O1-
ATOM   1883  H5   DC A  59     -25.312 -21.868 -46.520  4.00  0.00           H  
ATOM   1884  H6   DC A  59     -23.861 -21.515 -44.580  7.00  0.00           H  
ATOM   1885  H1'  DC A  59     -22.997 -24.386 -42.120  8.00  0.00           H  
ATOM   1886  H2'  DC A  59     -21.404 -22.672 -44.160  6.00  0.00           H  
ATOM   1887  H3'  DC A  59     -20.151 -22.010 -42.550  5.00  0.00           H  
ATOM   1888  H4'  DC A  59     -21.958 -21.765 -40.400  2.00  0.00           H  
ATOM   1889  H41  DC A  59     -26.197 -25.541 -47.330  9.00  0.00           H  
ATOM   1890  H5'  DC A  59     -21.917 -20.199 -43.070  0.00  0.00           H  
ATOM   1891  H42  DC A  59     -26.348 -23.912 -47.860  6.00  0.00           H  
ATOM   1892 H2''  DC A  59     -21.153 -24.221 -43.510  8.00  0.00           H  
ATOM   1893 H5''  DC A  59     -22.700 -19.635 -41.520  1.00  0.00           H  
ATOM   1894  P    DC A  60     -18.902 -23.984 -40.840  3.00  0.00           P  
ATOM   1895  C5'  DC A  60     -17.735 -23.607 -43.070  2.00  0.00           C  
ATOM   1896  O5'  DC A  60     -18.260 -24.484 -42.140  8.00  0.00           O  
ATOM   1897  C4'  DC A  60     -16.858 -24.159 -44.210  0.00  0.00           C  
ATOM   1898  O4'  DC A  60     -15.905 -25.082 -43.730  9.00  0.00           O  
ATOM   1899  C3'  DC A  60     -17.800 -24.996 -45.120  8.00  0.00           C  
ATOM   1900  O3'  DC A  60     -17.371 -24.972 -46.480  0.00  0.00           O  
ATOM   1901  C2'  DC A  60     -17.690 -26.345 -44.480  8.00  0.00           C  
ATOM   1902  C1'  DC A  60     -16.222 -26.376 -44.180  0.00  0.00           C  
ATOM   1903  N1   DC A  60     -15.757 -27.397 -43.160  8.00  0.00           N  
ATOM   1904  C2   DC A  60     -14.734 -28.322 -43.490  0.00  0.00           C  
ATOM   1905  O2   DC A  60     -14.167 -28.298 -44.630  7.00  0.00           O  
ATOM   1906  N3   DC A  60     -14.219 -29.166 -42.530  3.00  0.00           N  
ATOM   1907  C4   DC A  60     -14.737 -29.110 -41.270  1.00  0.00           C  
ATOM   1908  N4   DC A  60     -14.158 -29.936 -40.430  8.00  0.00           N  
ATOM   1909  C5   DC A  60     -15.728 -28.199 -40.890  9.00  0.00           C  
ATOM   1910  C6   DC A  60     -16.215 -27.363 -41.840  2.00  0.00           C  
ATOM   1911  OP1  DC A  60     -18.998 -25.064 -39.860  6.00  0.00           O  
ATOM   1912  OP2  DC A  60     -18.270 -22.721 -40.360  4.00  0.00           O1-
ATOM   1913  H5   DC A  60     -16.069 -28.179 -39.940  6.00  0.00           H  
ATOM   1914  H6   DC A  60     -16.950 -26.663 -41.580  8.00  0.00           H  
ATOM   1915  H1'  DC A  60     -15.682 -26.463 -45.180  2.00  0.00           H  
ATOM   1916  H2'  DC A  60     -18.230 -26.343 -43.530  8.00  0.00           H  
ATOM   1917  H3'  DC A  60     -18.792 -24.617 -45.050  8.00  0.00           H  
ATOM   1918  H4'  DC A  60     -16.327 -23.391 -44.750  0.00  0.00           H  
ATOM   1919  H41  DC A  60     -13.421 -30.472 -40.840  2.00  0.00           H  
ATOM   1920  H5'  DC A  60     -17.110 -22.857 -42.590  2.00  0.00           H  
ATOM   1921  H42  DC A  60     -14.170 -29.805 -39.390  3.00  0.00           H  
ATOM   1922 H2''  DC A  60     -18.009 -27.254 -45.080  0.00  0.00           H  
ATOM   1923 H5''  DC A  60     -18.543 -22.914 -43.400  6.00  0.00           H  
ATOM   1924  P    DT A  61     -18.147 -25.722 -47.620  1.00  0.00           P  
ATOM   1925  C5'  DT A  61     -16.543 -27.823 -48.040  0.00  0.00           C  
ATOM   1926  O5'  DT A  61     -17.656 -27.286 -47.410  7.00  0.00           O  
ATOM   1927  C4'  DT A  61     -16.842 -28.260 -49.440  9.00  0.00           C  
ATOM   1928  O4'  DT A  61     -15.565 -28.538 -50.010  9.00  0.00           O  
ATOM   1929  C3'  DT A  61     -17.600 -29.548 -49.600  3.00  0.00           C  
ATOM   1930  O3'  DT A  61     -18.233 -29.444 -50.910  3.00  0.00           O  
ATOM   1931  C2'  DT A  61     -16.507 -30.630 -49.530  7.00  0.00           C  
ATOM   1932  C1'  DT A  61     -15.485 -29.879 -50.440  8.00  0.00           C  
ATOM   1933  N1   DT A  61     -14.024 -30.160 -50.470  2.00  0.00           N  
ATOM   1934  C2   DT A  61     -13.316 -29.913 -51.660  2.00  0.00           C  
ATOM   1935  O2   DT A  61     -13.828 -29.276 -52.590  7.00  0.00           O  
ATOM   1936  N3   DT A  61     -12.023 -30.355 -51.750  9.00  0.00           N  
ATOM   1937  C4   DT A  61     -11.172 -30.659 -50.680  4.00  0.00           C  
ATOM   1938  O4   DT A  61     -10.035 -30.971 -51.000  8.00  0.00           O  
ATOM   1939  C5   DT A  61     -11.874 -30.656 -49.410  0.00  0.00           C  
ATOM   1940  C6   DT A  61     -13.222 -30.444 -49.310  5.00  0.00           C  
ATOM   1941  C7   DT A  61     -11.082 -30.921 -48.120  9.00  0.00           C  
ATOM   1942  OP1  DT A  61     -17.593 -25.317 -48.960  6.00  0.00           O  
ATOM   1943  OP2  DT A  61     -19.596 -25.460 -47.420  9.00  0.00           O1-
ATOM   1944  H3   DT A  61     -11.522 -30.228 -52.600  9.00  0.00           H  
ATOM   1945  H6   DT A  61     -13.743 -30.370 -48.400  9.00  0.00           H  
ATOM   1946  H1'  DT A  61     -15.869 -29.776 -51.480  9.00  0.00           H  
ATOM   1947  H2'  DT A  61     -16.147 -30.673 -48.530  0.00  0.00           H  
ATOM   1948  H3'  DT A  61     -18.317 -29.627 -48.760  6.00  0.00           H  
ATOM   1949  H4'  DT A  61     -17.368 -27.435 -49.980  9.00  0.00           H  
ATOM   1950  H5'  DT A  61     -16.257 -28.713 -47.410  6.00  0.00           H  
ATOM   1951  H71  DT A  61     -10.163 -30.245 -48.070  8.00  0.00           H  
ATOM   1952  H72  DT A  61     -10.628 -31.957 -48.170  6.00  0.00           H  
ATOM   1953  H73  DT A  61     -11.721 -30.848 -47.210  7.00  0.00           H  
ATOM   1954 H2''  DT A  61     -16.769 -31.585 -50.010  2.00  0.00           H  
ATOM   1955 H5''  DT A  61     -15.771 -27.059 -47.990  9.00  0.00           H  
ATOM   1956  P    DA A  62     -19.014 -30.679 -51.550  3.00  0.00           P  
ATOM   1957  C5'  DA A  62     -17.399 -30.705 -53.660  0.00  0.00           C  
ATOM   1958  O5'  DA A  62     -17.877 -31.340 -52.480  5.00  0.00           O  
ATOM   1959  C4'  DA A  62     -16.694 -31.674 -54.570  2.00  0.00           C  
ATOM   1960  O4'  DA A  62     -15.440 -32.206 -54.070  6.00  0.00           O  
ATOM   1961  C3'  DA A  62     -17.638 -32.843 -55.030  0.00  0.00           C  
ATOM   1962  O3'  DA A  62     -17.456 -33.192 -56.400  6.00  0.00           O  
ATOM   1963  C2'  DA A  62     -17.024 -34.016 -54.170  3.00  0.00           C  
ATOM   1964  C1'  DA A  62     -15.518 -33.604 -54.000  4.00  0.00           C  
ATOM   1965  N1   DA A  62     -11.018 -34.785 -51.770  6.00  0.00           N  
ATOM   1966  C2   DA A  62     -11.456 -34.884 -53.000  0.00  0.00           C  
ATOM   1967  N3   DA A  62     -12.596 -34.478 -53.520  8.00  0.00           N  
ATOM   1968  C4   DA A  62     -13.468 -34.075 -52.520  2.00  0.00           C  
ATOM   1969  C5   DA A  62     -13.200 -34.028 -51.170  7.00  0.00           C  
ATOM   1970  C6   DA A  62     -11.849 -34.260 -50.860  0.00  0.00           C  
ATOM   1971  N6   DA A  62     -11.298 -34.249 -49.650  5.00  0.00           N  
ATOM   1972  N7   DA A  62     -14.387 -33.634 -50.470  8.00  0.00           N  
ATOM   1973  C8   DA A  62     -15.297 -33.499 -51.420  8.00  0.00           C  
ATOM   1974  N9   DA A  62     -14.783 -33.837 -52.660  2.00  0.00           N  
ATOM   1975  OP1  DA A  62     -20.075 -30.139 -52.460  7.00  0.00           O  
ATOM   1976  OP2  DA A  62     -19.389 -31.632 -50.430  1.00  0.00           O1-
ATOM   1977  H2   DA A  62     -10.800 -35.272 -53.730  2.00  0.00           H  
ATOM   1978  H8   DA A  62     -16.301 -33.140 -51.300  0.00  0.00           H  
ATOM   1979  H1'  DA A  62     -14.976 -34.056 -54.880  8.00  0.00           H  
ATOM   1980  H2'  DA A  62     -17.392 -34.118 -53.180  9.00  0.00           H  
ATOM   1981  H3'  DA A  62     -18.705 -32.773 -54.880  9.00  0.00           H  
ATOM   1982  H4'  DA A  62     -16.378 -31.141 -55.470  9.00  0.00           H  
ATOM   1983  H5'  DA A  62     -16.667 -29.898 -53.390  4.00  0.00           H  
ATOM   1984  H61  DA A  62     -10.289 -34.384 -49.600  8.00  0.00           H  
ATOM   1985  H62  DA A  62     -11.821 -34.091 -48.780  7.00  0.00           H  
ATOM   1986 H2''  DA A  62     -16.989 -34.969 -54.760  9.00  0.00           H  
ATOM   1987 H5''  DA A  62     -18.228 -30.288 -54.140  0.00  0.00           H  
ATOM   1988  P    DA A  63     -18.464 -32.793 -57.530  0.00  0.00           P  
ATOM   1989  C5'  DA A  63     -20.069 -34.772 -58.400  5.00  0.00           C  
ATOM   1990  O5'  DA A  63     -19.746 -33.719 -57.460  1.00  0.00           O  
ATOM   1991  C4'  DA A  63     -21.298 -35.609 -58.110  0.00  0.00           C  
ATOM   1992  O4'  DA A  63     -21.018 -36.436 -57.010  9.00  0.00           O  
ATOM   1993  C3'  DA A  63     -22.565 -34.770 -57.830  3.00  0.00           C  
ATOM   1994  O3'  DA A  63     -23.636 -35.242 -58.610  5.00  0.00           O  
ATOM   1995  C2'  DA A  63     -22.736 -34.961 -56.340  2.00  0.00           C  
ATOM   1996  C1'  DA A  63     -22.019 -36.240 -55.990  8.00  0.00           C  
ATOM   1997  N1   DA A  63     -20.797 -38.570 -51.570  4.00  0.00           N  
ATOM   1998  C2   DA A  63     -21.490 -38.977 -52.580  7.00  0.00           C  
ATOM   1999  N3   DA A  63     -21.893 -38.320 -53.650  8.00  0.00           N  
ATOM   2000  C4   DA A  63     -21.362 -37.052 -53.620  4.00  0.00           C  
ATOM   2001  C5   DA A  63     -20.683 -36.402 -52.580  5.00  0.00           C  
ATOM   2002  C6   DA A  63     -20.406 -37.279 -51.490  9.00  0.00           C  
ATOM   2003  N6   DA A  63     -19.762 -37.021 -50.330  9.00  0.00           N  
ATOM   2004  N7   DA A  63     -20.077 -35.210 -53.020  0.00  0.00           N  
ATOM   2005  C8   DA A  63     -20.503 -35.175 -54.270  8.00  0.00           C  
ATOM   2006  N9   DA A  63     -21.369 -36.189 -54.670  5.00  0.00           N  
ATOM   2007  OP1  DA A  63     -17.749 -32.954 -58.800  0.00  0.00           O  
ATOM   2008  OP2  DA A  63     -18.902 -31.434 -57.140  2.00  0.00           O1-
ATOM   2009  H2   DA A  63     -21.770 -40.010 -52.510  5.00  0.00           H  
ATOM   2010  H8   DA A  63     -20.295 -34.268 -54.700  6.00  0.00           H  
ATOM   2011  H1'  DA A  63     -22.677 -37.089 -56.070  2.00  0.00           H  
ATOM   2012  H2'  DA A  63     -22.355 -34.060 -55.860  3.00  0.00           H  
ATOM   2013  H3'  DA A  63     -22.453 -33.720 -57.990  9.00  0.00           H  
ATOM   2014  H4'  DA A  63     -21.473 -36.177 -59.000  8.00  0.00           H  
ATOM   2015  H5'  DA A  63     -19.341 -35.523 -58.380  5.00  0.00           H  
ATOM   2016  H61  DA A  63     -20.005 -37.582 -49.510  3.00  0.00           H  
ATOM   2017  H62  DA A  63     -19.533 -36.057 -50.260  9.00  0.00           H  
ATOM   2018 H2''  DA A  63     -23.771 -35.099 -56.170  5.00  0.00           H  
ATOM   2019 H5''  DA A  63     -20.270 -34.344 -59.330  1.00  0.00           H  
ATOM   2020  P    DC A  64     -24.728 -34.282 -59.300  1.00  0.00           P  
ATOM   2021  C5'  DC A  64     -26.596 -34.280 -57.630  3.00  0.00           C  
ATOM   2022  O5'  DC A  64     -25.607 -33.564 -58.250  2.00  0.00           O  
ATOM   2023  C4'  DC A  64     -27.197 -33.606 -56.430  6.00  0.00           C  
ATOM   2024  O4'  DC A  64     -26.205 -33.331 -55.430  3.00  0.00           O  
ATOM   2025  C3'  DC A  64     -27.964 -32.351 -56.840  8.00  0.00           C  
ATOM   2026  O3'  DC A  64     -29.157 -32.345 -56.030  0.00  0.00           O  
ATOM   2027  C2'  DC A  64     -26.865 -31.294 -56.450  8.00  0.00           C  
ATOM   2028  C1'  DC A  64     -26.011 -31.944 -55.370  5.00  0.00           C  
ATOM   2029  N1   DC A  64     -24.525 -31.584 -55.430  8.00  0.00           N  
ATOM   2030  C2   DC A  64     -23.952 -30.956 -54.280  9.00  0.00           C  
ATOM   2031  O2   DC A  64     -24.574 -30.833 -53.240  6.00  0.00           O  
ATOM   2032  N3   DC A  64     -22.628 -30.543 -54.250  5.00  0.00           N  
ATOM   2033  C4   DC A  64     -21.938 -30.607 -55.410  0.00  0.00           C  
ATOM   2034  N4   DC A  64     -20.673 -30.303 -55.320  6.00  0.00           N  
ATOM   2035  C5   DC A  64     -22.476 -31.122 -56.600  3.00  0.00           C  
ATOM   2036  C6   DC A  64     -23.744 -31.675 -56.590  0.00  0.00           C  
ATOM   2037  OP1  DC A  64     -25.579 -35.153 -60.170  8.00  0.00           O  
ATOM   2038  OP2  DC A  64     -23.997 -33.209 -60.020  2.00  0.00           O1-
ATOM   2039  H5   DC A  64     -21.856 -31.375 -57.460  2.00  0.00           H  
ATOM   2040  H6   DC A  64     -24.198 -32.199 -57.480  6.00  0.00           H  
ATOM   2041  H1'  DC A  64     -26.396 -31.636 -54.450  7.00  0.00           H  
ATOM   2042  H2'  DC A  64     -26.357 -31.166 -57.350  2.00  0.00           H  
ATOM   2043  H3'  DC A  64     -28.209 -32.323 -57.900  6.00  0.00           H  
ATOM   2044  H4'  DC A  64     -27.933 -34.367 -56.030  4.00  0.00           H  
ATOM   2045  H41  DC A  64     -20.489 -29.972 -54.370  7.00  0.00           H  
ATOM   2046  H5'  DC A  64     -26.204 -35.271 -57.340  9.00  0.00           H  
ATOM   2047  H42  DC A  64     -19.961 -30.573 -56.040  8.00  0.00           H  
ATOM   2048 H2''  DC A  64     -27.326 -30.354 -56.190  4.00  0.00           H  
ATOM   2049 H5''  DC A  64     -27.422 -34.457 -58.280  7.00  0.00           H  
ATOM   2050  P    DC A  65     -30.068 -31.086 -56.130  7.00  0.00           P  
ATOM   2051  C5'  DC A  65     -29.560 -30.595 -53.570  1.00  0.00           C  
ATOM   2052  O5'  DC A  65     -29.539 -30.109 -54.910  4.00  0.00           O  
ATOM   2053  C4'  DC A  65     -28.786 -29.736 -52.570  0.00  0.00           C  
ATOM   2054  O4'  DC A  65     -27.408 -29.636 -52.980  1.00  0.00           O  
ATOM   2055  C3'  DC A  65     -29.346 -28.308 -52.340  9.00  0.00           C  
ATOM   2056  O3'  DC A  65     -29.206 -28.058 -50.970  1.00  0.00           O  
ATOM   2057  C2'  DC A  65     -28.379 -27.531 -53.240  0.00  0.00           C  
ATOM   2058  C1'  DC A  65     -27.095 -28.249 -52.880  4.00  0.00           C  
ATOM   2059  N1   DC A  65     -25.964 -28.008 -53.800  4.00  0.00           N  
ATOM   2060  C2   DC A  65     -24.659 -28.011 -53.270  2.00  0.00           C  
ATOM   2061  O2   DC A  65     -24.332 -28.403 -52.120  8.00  0.00           O  
ATOM   2062  N3   DC A  65     -23.609 -27.609 -54.010  4.00  0.00           N  
ATOM   2063  C4   DC A  65     -23.767 -27.408 -55.270  4.00  0.00           C  
ATOM   2064  N4   DC A  65     -22.676 -26.918 -55.900  2.00  0.00           N  
ATOM   2065  C5   DC A  65     -25.042 -27.469 -55.930  4.00  0.00           C  
ATOM   2066  C6   DC A  65     -26.098 -27.827 -55.150  9.00  0.00           C  
ATOM   2067  OP1  DC A  65     -31.442 -31.523 -55.790  4.00  0.00           O  
ATOM   2068  OP2  DC A  65     -29.805 -30.363 -57.440  8.00  0.00           O1-
ATOM   2069  H5   DC A  65     -25.202 -27.397 -56.930  1.00  0.00           H  
ATOM   2070  H6   DC A  65     -27.119 -27.894 -55.630  0.00  0.00           H  
ATOM   2071  H1'  DC A  65     -26.880 -28.017 -51.810  5.00  0.00           H  
ATOM   2072  H2'  DC A  65     -28.717 -27.555 -54.260  8.00  0.00           H  
ATOM   2073  H3'  DC A  65     -30.403 -28.210 -52.710  2.00  0.00           H  
ATOM   2074  H4'  DC A  65     -28.807 -30.122 -51.610  0.00  0.00           H  
ATOM   2075  H41  DC A  65     -21.896 -26.810 -55.320  9.00  0.00           H  
ATOM   2076  H5'  DC A  65     -29.132 -31.556 -53.660  6.00  0.00           H  
ATOM   2077  H42  DC A  65     -22.727 -26.656 -56.920  8.00  0.00           H  
ATOM   2078 H2''  DC A  65     -28.424 -26.566 -52.840  3.00  0.00           H  
ATOM   2079 H5''  DC A  65     -30.581 -30.612 -53.220  8.00  0.00           H  
ATOM   2080  P    DC A  66     -30.064 -26.950 -50.210  6.00  0.00           P  
ATOM   2081  C5'  DC A  66     -29.301 -26.672 -47.700  8.00  0.00           C  
ATOM   2082  O5'  DC A  66     -29.681 -27.477 -48.830  2.00  0.00           O  
ATOM   2083  C4'  DC A  66     -28.543 -27.690 -46.750  0.00  0.00           C  
ATOM   2084  O4'  DC A  66     -27.946 -26.833 -45.710  8.00  0.00           O  
ATOM   2085  C3'  DC A  66     -29.459 -28.696 -46.060  6.00  0.00           C  
ATOM   2086  O3'  DC A  66     -28.668 -29.807 -45.600  2.00  0.00           O  
ATOM   2087  C2'  DC A  66     -29.930 -27.772 -44.850  7.00  0.00           C  
ATOM   2088  C1'  DC A  66     -28.624 -27.052 -44.470  5.00  0.00           C  
ATOM   2089  N1   DC A  66     -28.835 -25.756 -43.680  1.00  0.00           N  
ATOM   2090  C2   DC A  66     -29.235 -25.881 -42.370  6.00  0.00           C  
ATOM   2091  O2   DC A  66     -29.734 -26.911 -41.940  0.00  0.00           O  
ATOM   2092  N3   DC A  66     -29.080 -24.904 -41.450  8.00  0.00           N  
ATOM   2093  C4   DC A  66     -28.662 -23.727 -41.950  4.00  0.00           C  
ATOM   2094  N4   DC A  66     -28.339 -22.856 -41.010  1.00  0.00           N  
ATOM   2095  C5   DC A  66     -28.355 -23.506 -43.340  8.00  0.00           C  
ATOM   2096  C6   DC A  66     -28.381 -24.578 -44.130  5.00  0.00           C  
ATOM   2097  OP1  DC A  66     -31.547 -27.231 -50.320  8.00  0.00           O  
ATOM   2098  OP2  DC A  66     -29.434 -25.619 -50.400  2.00  0.00           O1-
ATOM   2099  H5   DC A  66     -28.074 -22.508 -43.700  3.00  0.00           H  
ATOM   2100  H6   DC A  66     -27.956 -24.526 -45.180  4.00  0.00           H  
ATOM   2101  H1'  DC A  66     -28.008 -27.675 -43.820  7.00  0.00           H  
ATOM   2102  H2'  DC A  66     -30.542 -26.995 -45.250  3.00  0.00           H  
ATOM   2103  H3'  DC A  66     -30.310 -28.922 -46.720  0.00  0.00           H  
ATOM   2104  H4'  DC A  66     -27.738 -28.248 -47.210  6.00  0.00           H  
ATOM   2105  H41  DC A  66     -28.786 -22.957 -40.090  4.00  0.00           H  
ATOM   2106  H5'  DC A  66     -30.169 -26.185 -47.310  3.00  0.00           H  
ATOM   2107  H42  DC A  66     -27.935 -22.011 -41.350  9.00  0.00           H  
ATOM   2108 H2''  DC A  66     -30.390 -28.345 -44.090  4.00  0.00           H  
ATOM   2109 H5''  DC A  66     -28.474 -26.025 -48.030  5.00  0.00           H  
ATOM   2110  P    DT A  67     -29.428 -31.156 -45.160  3.00  0.00           P  
ATOM   2111  C5'  DT A  67     -28.549 -30.546 -42.740  9.00  0.00           C  
ATOM   2112  O5'  DT A  67     -29.565 -31.076 -43.600  5.00  0.00           O  
ATOM   2113  C4'  DT A  67     -28.374 -31.378 -41.500  1.00  0.00           C  
ATOM   2114  O4'  DT A  67     -27.342 -30.670 -40.760  0.00  0.00           O  
ATOM   2115  C3'  DT A  67     -29.609 -31.321 -40.600  7.00  0.00           C  
ATOM   2116  O3'  DT A  67     -29.650 -32.553 -39.800  8.00  0.00           O  
ATOM   2117  C2'  DT A  67     -29.444 -30.017 -39.830  9.00  0.00           C  
ATOM   2118  C1'  DT A  67     -27.925 -30.132 -39.540  8.00  0.00           C  
ATOM   2119  N1   DT A  67     -27.388 -28.775 -39.110  0.00  0.00           N  
ATOM   2120  C2   DT A  67     -27.185 -28.566 -37.710  0.00  0.00           C  
ATOM   2121  O2   DT A  67     -27.493 -29.368 -36.790  6.00  0.00           O  
ATOM   2122  N3   DT A  67     -26.583 -27.411 -37.370  4.00  0.00           N  
ATOM   2123  C4   DT A  67     -26.150 -26.374 -38.270  7.00  0.00           C  
ATOM   2124  O4   DT A  67     -25.491 -25.389 -37.810  5.00  0.00           O  
ATOM   2125  C5   DT A  67     -26.415 -26.650 -39.670  1.00  0.00           C  
ATOM   2126  C6   DT A  67     -27.060 -27.784 -40.070  2.00  0.00           C  
ATOM   2127  C7   DT A  67     -25.872 -25.604 -40.670  3.00  0.00           C  
ATOM   2128  OP1  DT A  67     -28.461 -32.248 -45.340  2.00  0.00           O  
ATOM   2129  OP2  DT A  67     -30.701 -31.276 -45.900  6.00  0.00           O1-
ATOM   2130  H3   DT A  67     -26.568 -27.234 -36.340  2.00  0.00           H  
ATOM   2131  H6   DT A  67     -27.312 -27.934 -41.140  7.00  0.00           H  
ATOM   2132  H1'  DT A  67     -27.754 -30.847 -38.720  5.00  0.00           H  
ATOM   2133  H2'  DT A  67     -29.680 -29.195 -40.530  2.00  0.00           H  
ATOM   2134  H3'  DT A  67     -30.503 -31.401 -41.230  2.00  0.00           H  
ATOM   2135  H4'  DT A  67     -28.100 -32.341 -41.680  4.00  0.00           H  
ATOM   2136  H5'  DT A  67     -28.795 -29.484 -42.490  4.00  0.00           H  
ATOM   2137  H71  DT A  67     -26.177 -24.612 -40.340  6.00  0.00           H  
ATOM   2138  H72  DT A  67     -26.240 -25.874 -41.650  0.00  0.00           H  
ATOM   2139  H73  DT A  67     -24.801 -25.685 -40.610  4.00  0.00           H  
ATOM   2140 H2''  DT A  67     -29.993 -29.819 -38.920  1.00  0.00           H  
ATOM   2141 H5''  DT A  67     -27.615 -30.542 -43.340  3.00  0.00           H  
ATOM   2142  P    DA A  68     -31.023 -33.246 -39.340  1.00  0.00           P  
ATOM   2143  C5'  DA A  68     -30.692 -35.537 -40.720  3.00  0.00           C  
ATOM   2144  O5'  DA A  68     -30.647 -34.784 -39.480  9.00  0.00           O  
ATOM   2145  C4'  DA A  68     -30.083 -36.904 -40.570  8.00  0.00           C  
ATOM   2146  O4'  DA A  68     -30.251 -37.362 -41.830  5.00  0.00           O  
ATOM   2147  C3'  DA A  68     -28.594 -36.773 -40.230  7.00  0.00           C  
ATOM   2148  O3'  DA A  68     -28.265 -37.699 -39.210  4.00  0.00           O  
ATOM   2149  C2'  DA A  68     -28.052 -37.156 -41.600  1.00  0.00           C  
ATOM   2150  C1'  DA A  68     -29.096 -38.063 -42.220  2.00  0.00           C  
ATOM   2151  N1   DA A  68     -29.092 -41.682 -45.760  5.00  0.00           N  
ATOM   2152  C2   DA A  68     -29.469 -41.672 -44.520  3.00  0.00           C  
ATOM   2153  N3   DA A  68     -29.438 -40.662 -43.710  3.00  0.00           N  
ATOM   2154  C4   DA A  68     -29.009 -39.510 -44.320  5.00  0.00           C  
ATOM   2155  C5   DA A  68     -28.540 -39.386 -45.590  4.00  0.00           C  
ATOM   2156  C6   DA A  68     -28.553 -40.567 -46.300  9.00  0.00           C  
ATOM   2157  N6   DA A  68     -28.118 -40.682 -47.540  5.00  0.00           N  
ATOM   2158  N7   DA A  68     -28.177 -38.059 -45.820  8.00  0.00           N  
ATOM   2159  C8   DA A  68     -28.363 -37.514 -44.640  2.00  0.00           C  
ATOM   2160  N9   DA A  68     -28.938 -38.302 -43.670  4.00  0.00           N  
ATOM   2161  OP1  DA A  68     -32.067 -32.918 -40.330  5.00  0.00           O  
ATOM   2162  OP2  DA A  68     -31.280 -33.021 -37.890  4.00  0.00           O1-
ATOM   2163  H2   DA A  68     -29.776 -42.678 -44.140  0.00  0.00           H  
ATOM   2164  H8   DA A  68     -28.256 -36.525 -44.340  0.00  0.00           H  
ATOM   2165  H1'  DA A  68     -29.040 -39.013 -41.730  7.00  0.00           H  
ATOM   2166  H2'  DA A  68     -27.841 -36.256 -42.150  2.00  0.00           H  
ATOM   2167  H3'  DA A  68     -28.262 -35.740 -39.990  9.00  0.00           H  
ATOM   2168  H4'  DA A  68     -30.606 -37.520 -39.910  5.00  0.00           H  
ATOM   2169  H5'  DA A  68     -30.083 -35.018 -41.510  4.00  0.00           H  
ATOM   2170  H61  DA A  68     -28.271 -41.599 -47.950  4.00  0.00           H  
ATOM   2171  H62  DA A  68     -27.587 -39.906 -48.040  1.00  0.00           H  
ATOM   2172 H2''  DA A  68     -27.050 -37.637 -41.470  3.00  0.00           H  
ATOM   2173 H5''  DA A  68     -31.776 -35.618 -40.900  6.00  0.00           H  
ATOM   2174  P    DA A  69     -27.846 -37.214 -37.670  8.00  0.00           P  
ATOM   2175  C5'  DA A  69     -25.290 -37.189 -38.210  2.00  0.00           C  
ATOM   2176  O5'  DA A  69     -26.372 -36.503 -37.600  7.00  0.00           O  
ATOM   2177  C4'  DA A  69     -23.918 -36.602 -37.840  7.00  0.00           C  
ATOM   2178  O4'  DA A  69     -22.984 -37.527 -38.460  6.00  0.00           O  
ATOM   2179  C3'  DA A  69     -23.761 -35.215 -38.410  9.00  0.00           C  
ATOM   2180  O3'  DA A  69     -22.982 -34.289 -37.640  6.00  0.00           O  
ATOM   2181  C2'  DA A  69     -23.102 -35.572 -39.750  9.00  0.00           C  
ATOM   2182  C1'  DA A  69     -22.183 -36.751 -39.380  1.00  0.00           C  
ATOM   2183  N1   DA A  69     -18.015 -39.007 -41.170  3.00  0.00           N  
ATOM   2184  C2   DA A  69     -18.221 -38.243 -40.100  7.00  0.00           C  
ATOM   2185  N3   DA A  69     -19.390 -37.663 -39.790  0.00  0.00           N  
ATOM   2186  C4   DA A  69     -20.391 -37.906 -40.660  5.00  0.00           C  
ATOM   2187  C5   DA A  69     -20.290 -38.681 -41.810  6.00  0.00           C  
ATOM   2188  C6   DA A  69     -19.035 -39.241 -42.030  2.00  0.00           C  
ATOM   2189  N6   DA A  69     -18.789 -40.099 -42.990  1.00  0.00           N  
ATOM   2190  N7   DA A  69     -21.530 -38.749 -42.460  4.00  0.00           N  
ATOM   2191  C8   DA A  69     -22.360 -38.033 -41.720  0.00  0.00           C  
ATOM   2192  N9   DA A  69     -21.706 -37.532 -40.570  5.00  0.00           N  
ATOM   2193  OP1  DA A  69     -27.740 -38.420 -36.830  5.00  0.00           O  
ATOM   2194  OP2  DA A  69     -28.814 -36.223 -37.220  7.00  0.00           O1-
ATOM   2195  H2   DA A  69     -17.366 -37.905 -39.510  4.00  0.00           H  
ATOM   2196  H8   DA A  69     -23.438 -37.915 -41.900  3.00  0.00           H  
ATOM   2197  H1'  DA A  69     -21.317 -36.476 -38.870  0.00  0.00           H  
ATOM   2198  H2'  DA A  69     -23.887 -35.922 -40.400  0.00  0.00           H  
ATOM   2199  H3'  DA A  69     -24.654 -34.717 -38.740  4.00  0.00           H  
ATOM   2200  H4'  DA A  69     -23.901 -36.555 -36.710  9.00  0.00           H  
ATOM   2201  H5'  DA A  69     -25.495 -37.185 -39.280  5.00  0.00           H  
ATOM   2202  H61  DA A  69     -17.889 -40.624 -43.000  4.00  0.00           H  
ATOM   2203  H62  DA A  69     -19.535 -40.491 -43.540  8.00  0.00           H  
ATOM   2204 H2''  DA A  69     -22.545 -34.766 -40.310  3.00  0.00           H  
ATOM   2205 H5''  DA A  69     -25.333 -38.199 -37.840  8.00  0.00           H  
ATOM   2206  P    DC A  70     -23.604 -33.008 -36.960  1.00  0.00           P  
ATOM   2207  C5'  DC A  70     -24.691 -31.783 -39.060  3.00  0.00           C  
ATOM   2208  O5'  DC A  70     -23.571 -31.944 -38.100  5.00  0.00           O  
ATOM   2209  C4'  DC A  70     -24.451 -30.573 -40.020  5.00  0.00           C  
ATOM   2210  O4'  DC A  70     -24.579 -29.305 -39.400  2.00  0.00           O  
ATOM   2211  C3'  DC A  70     -22.990 -30.438 -40.610  3.00  0.00           C  
ATOM   2212  O3'  DC A  70     -23.049 -29.610 -41.740  9.00  0.00           O  
ATOM   2213  C2'  DC A  70     -22.266 -29.675 -39.520  4.00  0.00           C  
ATOM   2214  C1'  DC A  70     -23.327 -28.669 -38.990  7.00  0.00           C  
ATOM   2215  N1   DC A  70     -23.375 -28.340 -37.570  4.00  0.00           N  
ATOM   2216  C2   DC A  70     -22.751 -27.130 -37.070  8.00  0.00           C  
ATOM   2217  O2   DC A  70     -22.130 -26.360 -37.860  4.00  0.00           O  
ATOM   2218  N3   DC A  70     -23.018 -26.798 -35.770  6.00  0.00           N  
ATOM   2219  C4   DC A  70     -23.760 -27.580 -35.000  9.00  0.00           C  
ATOM   2220  N4   DC A  70     -23.770 -27.460 -33.690  4.00  0.00           N  
ATOM   2221  C5   DC A  70     -24.257 -28.864 -35.430  3.00  0.00           C  
ATOM   2222  C6   DC A  70     -24.089 -29.147 -36.720  6.00  0.00           C  
ATOM   2223  OP1  DC A  70     -22.674 -32.539 -35.940  1.00  0.00           O  
ATOM   2224  OP2  DC A  70     -24.996 -33.229 -36.590  7.00  0.00           O1-
ATOM   2225  H5   DC A  70     -24.658 -29.561 -34.810  5.00  0.00           H  
ATOM   2226  H6   DC A  70     -24.443 -30.094 -37.110  5.00  0.00           H  
ATOM   2227  H1'  DC A  70     -23.239 -27.718 -39.510  2.00  0.00           H  
ATOM   2228  H2'  DC A  70     -21.990 -30.329 -38.690  4.00  0.00           H  
ATOM   2229  H3'  DC A  70     -22.503 -31.399 -40.880  8.00  0.00           H  
ATOM   2230  H4'  DC A  70     -25.112 -30.724 -40.820  2.00  0.00           H  
ATOM   2231  H41  DC A  70     -23.537 -26.594 -33.310  2.00  0.00           H  
ATOM   2232  H5'  DC A  70     -25.628 -31.677 -38.390  4.00  0.00           H  
ATOM   2233  H42  DC A  70     -24.381 -28.031 -33.140  7.00  0.00           H  
ATOM   2234 H2''  DC A  70     -21.380 -29.170 -39.960  7.00  0.00           H  
ATOM   2235 H5''  DC A  70     -24.948 -32.675 -39.660  1.00  0.00           H  
ATOM   2236  P    DC A  71     -22.345 -29.986 -43.140  6.00  0.00           P  
ATOM   2237  C5'  DC A  71     -23.970 -31.893 -43.840  9.00  0.00           C  
ATOM   2238  O5'  DC A  71     -22.662 -31.439 -43.570  2.00  0.00           O  
ATOM   2239  C4'  DC A  71     -24.118 -32.410 -45.310  2.00  0.00           C  
ATOM   2240  O4'  DC A  71     -23.949 -31.263 -46.180  5.00  0.00           O  
ATOM   2241  C3'  DC A  71     -23.121 -33.516 -45.670  6.00  0.00           C  
ATOM   2242  O3'  DC A  71     -23.668 -34.631 -46.360  7.00  0.00           O  
ATOM   2243  C2'  DC A  71     -22.191 -32.641 -46.570  4.00  0.00           C  
ATOM   2244  C1'  DC A  71     -23.151 -31.652 -47.280  7.00  0.00           C  
ATOM   2245  N1   DC A  71     -22.403 -30.486 -47.850  0.00  0.00           N  
ATOM   2246  C2   DC A  71     -22.625 -30.030 -49.130  6.00  0.00           C  
ATOM   2247  O2   DC A  71     -23.516 -30.498 -49.820  9.00  0.00           O  
ATOM   2248  N3   DC A  71     -21.802 -29.103 -49.750  2.00  0.00           N  
ATOM   2249  C4   DC A  71     -20.869 -28.535 -49.000  8.00  0.00           C  
ATOM   2250  N4   DC A  71     -20.139 -27.622 -49.530  9.00  0.00           N  
ATOM   2251  C5   DC A  71     -20.632 -28.872 -47.700  5.00  0.00           C  
ATOM   2252  C6   DC A  71     -21.438 -29.796 -47.110  1.00  0.00           C  
ATOM   2253  OP1  DC A  71     -20.916 -29.911 -42.860  6.00  0.00           O  
ATOM   2254  OP2  DC A  71     -22.945 -29.033 -44.140  8.00  0.00           O1-
ATOM   2255  H5   DC A  71     -19.944 -28.307 -47.150  6.00  0.00           H  
ATOM   2256  H6   DC A  71     -21.361 -30.065 -46.040  4.00  0.00           H  
ATOM   2257  H1'  DC A  71     -23.698 -32.191 -48.090  7.00  0.00           H  
ATOM   2258  H2'  DC A  71     -21.451 -32.114 -45.930  9.00  0.00           H  
ATOM   2259  H3'  DC A  71     -22.609 -33.836 -44.800  8.00  0.00           H  
ATOM   2260  H4'  DC A  71     -25.133 -32.844 -45.470  3.00  0.00           H  
ATOM   2261  H41  DC A  71     -20.448 -27.295 -50.490  5.00  0.00           H  
ATOM   2262  H5'  DC A  71     -24.636 -31.057 -43.730  2.00  0.00           H  
ATOM   2263  H42  DC A  71     -19.621 -26.987 -48.850  7.00  0.00           H  
ATOM   2264 H2''  DC A  71     -21.650 -33.236 -47.300  6.00  0.00           H  
ATOM   2265 H5''  DC A  71     -24.422 -32.718 -43.240  5.00  0.00           H  
ATOM   2266  P    DC A  72     -23.015 -36.056 -46.240  5.00  0.00           P  
ATOM   2267  C5'  DC A  72     -25.198 -37.396 -46.940  3.00  0.00           C  
ATOM   2268  O5'  DC A  72     -23.822 -37.008 -47.200  2.00  0.00           O  
ATOM   2269  C4'  DC A  72     -25.874 -37.512 -48.330  7.00  0.00           C  
ATOM   2270  O4'  DC A  72     -25.919 -36.306 -49.070  8.00  0.00           O  
ATOM   2271  C3'  DC A  72     -25.301 -38.615 -49.180  0.00  0.00           C  
ATOM   2272  O3'  DC A  72     -26.301 -39.398 -49.820  2.00  0.00           O  
ATOM   2273  C2'  DC A  72     -24.500 -37.849 -50.220  5.00  0.00           C  
ATOM   2274  C1'  DC A  72     -25.260 -36.539 -50.290  1.00  0.00           C  
ATOM   2275  N1   DC A  72     -24.388 -35.379 -50.680  4.00  0.00           N  
ATOM   2276  C2   DC A  72     -24.497 -34.630 -51.910  1.00  0.00           C  
ATOM   2277  O2   DC A  72     -25.207 -34.957 -52.870  5.00  0.00           O  
ATOM   2278  N3   DC A  72     -23.612 -33.660 -52.160  5.00  0.00           N  
ATOM   2279  C4   DC A  72     -22.577 -33.470 -51.350  8.00  0.00           C  
ATOM   2280  N4   DC A  72     -21.761 -32.571 -51.670  6.00  0.00           N  
ATOM   2281  C5   DC A  72     -22.432 -34.182 -50.170  2.00  0.00           C  
ATOM   2282  C6   DC A  72     -23.296 -35.200 -49.940  9.00  0.00           C  
ATOM   2283  OP1  DC A  72     -23.035 -36.525 -44.890  2.00  0.00           O  
ATOM   2284  OP2  DC A  72     -21.629 -36.041 -46.850  8.00  0.00           O1-
ATOM   2285  H5   DC A  72     -21.601 -33.907 -49.450  1.00  0.00           H  
ATOM   2286  H6   DC A  72     -23.096 -35.928 -49.120  8.00  0.00           H  
ATOM   2287  H1'  DC A  72     -26.009 -36.685 -51.030  8.00  0.00           H  
ATOM   2288  H2'  DC A  72     -23.535 -37.739 -49.870  5.00  0.00           H  
ATOM   2289  H3'  DC A  72     -24.596 -39.259 -48.730  2.00  0.00           H  
ATOM   2290  H4'  DC A  72     -26.907 -37.833 -48.230  1.00  0.00           H  
ATOM   2291  H41  DC A  72     -22.054 -32.179 -52.510  2.00  0.00           H  
ATOM   2292  H5'  DC A  72     -25.689 -36.664 -46.430  5.00  0.00           H  
ATOM   2293  H42  DC A  72     -20.949 -32.278 -51.060  0.00  0.00           H  
ATOM   2294 H2''  DC A  72     -24.473 -38.318 -51.180  5.00  0.00           H  
ATOM   2295 H5''  DC A  72     -25.335 -38.354 -46.450  4.00  0.00           H  
ATOM   2296  P    DT A  73     -25.896 -40.713 -50.650  9.00  0.00           P  
ATOM   2297  C5'  DT A  73     -24.454 -42.386 -48.980  7.00  0.00           C  
ATOM   2298  O5'  DT A  73     -24.475 -41.389 -49.980  7.00  0.00           O  
ATOM   2299  C4'  DT A  73     -23.047 -42.563 -48.310  3.00  0.00           C  
ATOM   2300  O4'  DT A  73     -22.224 -43.348 -49.160  5.00  0.00           O  
ATOM   2301  C3'  DT A  73     -22.184 -41.417 -47.870  6.00  0.00           C  
ATOM   2302  O3'  DT A  73     -21.642 -41.866 -46.620  5.00  0.00           O  
ATOM   2303  C2'  DT A  73     -21.116 -41.240 -48.980  2.00  0.00           C  
ATOM   2304  C1'  DT A  73     -20.955 -42.694 -49.380  6.00  0.00           C  
ATOM   2305  N1   DT A  73     -20.553 -43.010 -50.700  7.00  0.00           N  
ATOM   2306  C2   DT A  73     -19.413 -43.835 -50.890  2.00  0.00           C  
ATOM   2307  O2   DT A  73     -18.764 -44.274 -49.900  2.00  0.00           O  
ATOM   2308  N3   DT A  73     -19.002 -44.015 -52.160  1.00  0.00           N  
ATOM   2309  C4   DT A  73     -19.633 -43.525 -53.240  2.00  0.00           C  
ATOM   2310  O4   DT A  73     -19.129 -43.851 -54.350  7.00  0.00           O  
ATOM   2311  C5   DT A  73     -20.879 -42.734 -53.000  7.00  0.00           C  
ATOM   2312  C6   DT A  73     -21.326 -42.515 -51.710  2.00  0.00           C  
ATOM   2313  C7   DT A  73     -21.690 -42.159 -54.120  5.00  0.00           C  
ATOM   2314  OP1  DT A  73     -25.717 -40.409 -52.090  5.00  0.00           O  
ATOM   2315  OP2  DT A  73     -26.905 -41.758 -50.390  9.00  0.00           O1-
ATOM   2316  H3   DT A  73     -18.194 -44.594 -52.400  9.00  0.00           H  
ATOM   2317  H6   DT A  73     -22.309 -41.980 -51.550  9.00  0.00           H  
ATOM   2318  H1'  DT A  73     -20.249 -43.071 -48.750  2.00  0.00           H  
ATOM   2319  H2'  DT A  73     -21.480 -40.618 -49.870  3.00  0.00           H  
ATOM   2320  H3'  DT A  73     -22.957 -40.628 -47.750  4.00  0.00           H  
ATOM   2321  H4'  DT A  73     -23.140 -43.184 -47.380  3.00  0.00           H  
ATOM   2322  H5'  DT A  73     -24.779 -43.282 -49.450  8.00  0.00           H  
ATOM   2323  H71  DT A  73     -21.582 -42.785 -54.980  7.00  0.00           H  
ATOM   2324  H72  DT A  73     -22.685 -42.117 -53.800  4.00  0.00           H  
ATOM   2325  H73  DT A  73     -21.293 -41.118 -54.380  4.00  0.00           H  
ATOM   2326 H2''  DT A  73     -20.125 -40.844 -48.460  0.00  0.00           H  
ATOM   2327 H5''  DT A  73     -25.204 -42.067 -48.280  7.00  0.00           H  
ATOM   2328  P    DA A  74     -20.916 -40.990 -45.550  4.00  0.00           P  
ATOM   2329  C5'  DA A  74     -18.614 -42.268 -46.190  9.00  0.00           C  
ATOM   2330  O5'  DA A  74     -19.435 -41.051 -46.160  8.00  0.00           O  
ATOM   2331  C4'  DA A  74     -17.343 -42.014 -46.990  8.00  0.00           C  
ATOM   2332  O4'  DA A  74     -17.583 -41.940 -48.360  1.00  0.00           O  
ATOM   2333  C3'  DA A  74     -16.479 -40.833 -46.570  0.00  0.00           C  
ATOM   2334  O3'  DA A  74     -15.377 -41.387 -45.800  4.00  0.00           O  
ATOM   2335  C2'  DA A  74     -16.074 -40.228 -47.920  0.00  0.00           C  
ATOM   2336  C1'  DA A  74     -16.399 -41.358 -48.930  9.00  0.00           C  
ATOM   2337  N1   DA A  74     -15.054 -41.887 -53.890  9.00  0.00           N  
ATOM   2338  C2   DA A  74     -14.400 -42.235 -52.810  2.00  0.00           C  
ATOM   2339  N3   DA A  74     -14.795 -42.056 -51.530  9.00  0.00           N  
ATOM   2340  C4   DA A  74     -16.018 -41.339 -51.470  6.00  0.00           C  
ATOM   2341  C5   DA A  74     -16.792 -40.950 -52.520  3.00  0.00           C  
ATOM   2342  C6   DA A  74     -16.246 -41.296 -53.770  0.00  0.00           C  
ATOM   2343  N6   DA A  74     -16.754 -41.004 -54.940  1.00  0.00           N  
ATOM   2344  N7   DA A  74     -17.931 -40.307 -52.090  0.00  0.00           N  
ATOM   2345  C8   DA A  74     -17.821 -40.360 -50.780  5.00  0.00           C  
ATOM   2346  N9   DA A  74     -16.736 -41.027 -50.310  0.00  0.00           N  
ATOM   2347  OP1  DA A  74     -20.799 -41.679 -44.250  0.00  0.00           O  
ATOM   2348  OP2  DA A  74     -21.526 -39.642 -45.600  1.00  0.00           O1-
ATOM   2349  H2   DA A  74     -13.363 -42.664 -52.950  8.00  0.00           H  
ATOM   2350  H8   DA A  74     -18.559 -39.955 -50.160  8.00  0.00           H  
ATOM   2351  H1'  DA A  74     -15.614 -42.041 -49.030  3.00  0.00           H  
ATOM   2352  H2'  DA A  74     -16.533 -39.348 -48.190  2.00  0.00           H  
ATOM   2353  H3'  DA A  74     -17.071 -40.112 -46.050  8.00  0.00           H  
ATOM   2354  H4'  DA A  74     -16.807 -43.028 -46.860  1.00  0.00           H  
ATOM   2355  H5'  DA A  74     -19.245 -42.973 -46.780  1.00  0.00           H  
ATOM   2356  H61  DA A  74     -16.286 -41.298 -55.750  1.00  0.00           H  
ATOM   2357  H62  DA A  74     -17.724 -40.818 -55.020  0.00  0.00           H  
ATOM   2358 H2''  DA A  74     -15.065 -39.925 -47.880  2.00  0.00           H  
ATOM   2359 H5''  DA A  74     -18.348 -42.498 -45.150  1.00  0.00           H  
ATOM   2360  P    DA A  75     -14.891 -40.753 -44.400  8.00  0.00           P  
ATOM   2361  C5'  DA A  75     -12.763 -39.715 -45.480  9.00  0.00           C  
ATOM   2362  O5'  DA A  75     -14.051 -39.488 -44.840  7.00  0.00           O  
ATOM   2363  C4'  DA A  75     -12.180 -38.525 -46.270  4.00  0.00           C  
ATOM   2364  O4'  DA A  75     -12.977 -38.399 -47.430  3.00  0.00           O  
ATOM   2365  C3'  DA A  75     -12.473 -37.186 -45.530  1.00  0.00           C  
ATOM   2366  O3'  DA A  75     -11.311 -36.289 -45.780  1.00  0.00           O  
ATOM   2367  C2'  DA A  75     -13.793 -36.748 -46.130  0.00  0.00           C  
ATOM   2368  C1'  DA A  75     -13.531 -37.138 -47.590  7.00  0.00           C  
ATOM   2369  N1   DA A  75     -15.371 -37.648 -52.380  1.00  0.00           N  
ATOM   2370  C2   DA A  75     -14.237 -38.104 -51.830  3.00  0.00           C  
ATOM   2371  N3   DA A  75     -13.793 -37.859 -50.600  3.00  0.00           N  
ATOM   2372  C4   DA A  75     -14.761 -37.292 -49.840  6.00  0.00           C  
ATOM   2373  C5   DA A  75     -15.971 -36.764 -50.260  9.00  0.00           C  
ATOM   2374  C6   DA A  75     -16.267 -37.032 -51.610  0.00  0.00           C  
ATOM   2375  N6   DA A  75     -17.328 -36.616 -52.280  5.00  0.00           N  
ATOM   2376  N7   DA A  75     -16.697 -36.132 -49.230  0.00  0.00           N  
ATOM   2377  C8   DA A  75     -15.911 -36.349 -48.180  4.00  0.00           C  
ATOM   2378  N9   DA A  75     -14.714 -37.000 -48.490  7.00  0.00           N  
ATOM   2379  OP1  DA A  75     -13.928 -41.746 -43.840  5.00  0.00           O  
ATOM   2380  OP2  DA A  75     -16.095 -40.474 -43.540  9.00  0.00           O1-
ATOM   2381  H2   DA A  75     -13.501 -38.620 -52.480  4.00  0.00           H  
ATOM   2382  H8   DA A  75     -16.039 -35.865 -47.190  2.00  0.00           H  
ATOM   2383  H1'  DA A  75     -12.730 -36.480 -47.830  1.00  0.00           H  
ATOM   2384  H2'  DA A  75     -14.533 -37.382 -45.700  1.00  0.00           H  
ATOM   2385  H3'  DA A  75     -12.572 -37.278 -44.440  4.00  0.00           H  
ATOM   2386  H4'  DA A  75     -11.144 -38.605 -46.550  6.00  0.00           H  
ATOM   2387  H5'  DA A  75     -12.891 -40.502 -46.210  8.00  0.00           H  
ATOM   2388  H61  DA A  75     -17.543 -36.947 -53.240  1.00  0.00           H  
ATOM   2389  H62  DA A  75     -17.914 -35.890 -51.830  0.00  0.00           H  
ATOM   2390 H2''  DA A  75     -14.113 -35.704 -46.020  4.00  0.00           H  
ATOM   2391 H5''  DA A  75     -11.981 -40.115 -44.830  6.00  0.00           H  
ATOM   2392  P    DC A  76     -11.338 -34.659 -45.690  9.00  0.00           P  
ATOM   2393  C5'  DC A  76     -11.751 -34.030 -43.150  4.00  0.00           C  
ATOM   2394  O5'  DC A  76     -12.266 -34.268 -44.380  8.00  0.00           O  
ATOM   2395  C4'  DC A  76     -12.816 -33.661 -42.140  9.00  0.00           C  
ATOM   2396  O4'  DC A  76     -13.510 -32.517 -42.540  9.00  0.00           O  
ATOM   2397  C3'  DC A  76     -13.797 -34.869 -41.930  8.00  0.00           C  
ATOM   2398  O3'  DC A  76     -13.927 -35.101 -40.550  2.00  0.00           O  
ATOM   2399  C2'  DC A  76     -15.103 -34.276 -42.570  7.00  0.00           C  
ATOM   2400  C1'  DC A  76     -14.891 -32.838 -42.250  7.00  0.00           C  
ATOM   2401  N1   DC A  76     -15.762 -31.978 -43.180  7.00  0.00           N  
ATOM   2402  C2   DC A  76     -16.838 -31.317 -42.560  6.00  0.00           C  
ATOM   2403  O2   DC A  76     -17.007 -31.351 -41.340  2.00  0.00           O  
ATOM   2404  N3   DC A  76     -17.757 -30.717 -43.260  6.00  0.00           N  
ATOM   2405  C4   DC A  76     -17.713 -30.722 -44.560  3.00  0.00           C  
ATOM   2406  N4   DC A  76     -18.853 -30.291 -45.020  4.00  0.00           N  
ATOM   2407  C5   DC A  76     -16.740 -31.345 -45.350  6.00  0.00           C  
ATOM   2408  C6   DC A  76     -15.759 -31.976 -44.580  9.00  0.00           C  
ATOM   2409  OP1  DC A  76     -11.913 -34.218 -46.930  2.00  0.00           O  
ATOM   2410  OP2  DC A  76      -9.926 -34.237 -45.430  1.00  0.00           O1-
ATOM   2411  H5   DC A  76     -16.771 -31.365 -46.450  3.00  0.00           H  
ATOM   2412  H6   DC A  76     -14.894 -32.358 -45.090  8.00  0.00           H  
ATOM   2413  H1'  DC A  76     -15.212 -32.694 -41.210  1.00  0.00           H  
ATOM   2414  H2'  DC A  76     -15.255 -34.495 -43.650  4.00  0.00           H  
ATOM   2415  H3'  DC A  76     -13.394 -35.701 -42.470  8.00  0.00           H  
ATOM   2416  H4'  DC A  76     -12.395 -33.438 -41.150  1.00  0.00           H  
ATOM   2417  H41  DC A  76     -19.504 -30.237 -44.310  6.00  0.00           H  
ATOM   2418  H5'  DC A  76     -11.003 -33.201 -43.210  0.00  0.00           H  
ATOM   2419  H42  DC A  76     -19.062 -30.492 -45.970  7.00  0.00           H  
ATOM   2420 H2''  DC A  76     -15.955 -34.682 -42.030  8.00  0.00           H  
ATOM   2421 H5''  DC A  76     -11.226 -34.969 -42.870  5.00  0.00           H  
ATOM   2422  P    DC A  77     -14.388 -36.569 -39.880  1.00  0.00           P  
ATOM   2423  C5'  DC A  77     -13.878 -35.873 -37.420  4.00  0.00           C  
ATOM   2424  O5'  DC A  77     -14.816 -36.346 -38.340  5.00  0.00           O  
ATOM   2425  C4'  DC A  77     -14.438 -35.472 -36.050  1.00  0.00           C  
ATOM   2426  O4'  DC A  77     -15.431 -34.437 -36.180  8.00  0.00           O  
ATOM   2427  C3'  DC A  77     -15.042 -36.639 -35.290  0.00  0.00           C  
ATOM   2428  O3'  DC A  77     -14.941 -36.488 -33.890  4.00  0.00           O  
ATOM   2429  C2'  DC A  77     -16.511 -36.486 -35.700  9.00  0.00           C  
ATOM   2430  C1'  DC A  77     -16.666 -34.984 -35.730  4.00  0.00           C  
ATOM   2431  N1   DC A  77     -17.712 -34.472 -36.590  7.00  0.00           N  
ATOM   2432  C2   DC A  77     -19.053 -34.214 -36.100  8.00  0.00           C  
ATOM   2433  O2   DC A  77     -19.321 -34.507 -34.890  7.00  0.00           O  
ATOM   2434  N3   DC A  77     -20.047 -33.725 -36.910  8.00  0.00           N  
ATOM   2435  C4   DC A  77     -19.715 -33.496 -38.190  1.00  0.00           C  
ATOM   2436  N4   DC A  77     -20.650 -33.161 -38.980  9.00  0.00           N  
ATOM   2437  C5   DC A  77     -18.459 -33.666 -38.690  9.00  0.00           C  
ATOM   2438  C6   DC A  77     -17.479 -34.265 -37.940  2.00  0.00           C  
ATOM   2439  OP1  DC A  77     -13.218 -37.494 -39.860  4.00  0.00           O  
ATOM   2440  OP2  DC A  77     -15.588 -36.939 -40.640  7.00  0.00           O1-
ATOM   2441  H5   DC A  77     -18.187 -33.467 -39.680  1.00  0.00           H  
ATOM   2442  H6   DC A  77     -16.550 -34.384 -38.420  7.00  0.00           H  
ATOM   2443  H1'  DC A  77     -16.916 -34.714 -34.670  8.00  0.00           H  
ATOM   2444  H2'  DC A  77     -16.561 -36.890 -36.660  2.00  0.00           H  
ATOM   2445  H3'  DC A  77     -14.524 -37.565 -35.720  2.00  0.00           H  
ATOM   2446  H4'  DC A  77     -13.623 -35.120 -35.440  2.00  0.00           H  
ATOM   2447  H41  DC A  77     -21.539 -32.942 -38.610  8.00  0.00           H  
ATOM   2448  H5'  DC A  77     -13.312 -35.037 -37.850  9.00  0.00           H  
ATOM   2449  H42  DC A  77     -20.413 -32.915 -39.920  8.00  0.00           H  
ATOM   2450 H2''  DC A  77     -17.215 -36.855 -35.030  6.00  0.00           H  
ATOM   2451 H5''  DC A  77     -13.214 -36.725 -37.260  3.00  0.00           H  
ATOM   2452  P    DC A  78     -15.018 -37.830 -33.040  2.00  0.00           P  
ATOM   2453  C5'  DC A  78     -14.727 -36.628 -30.770  4.00  0.00           C  
ATOM   2454  O5'  DC A  78     -14.289 -37.583 -31.720  3.00  0.00           O  
ATOM   2455  C4'  DC A  78     -13.516 -36.237 -29.810  2.00  0.00           C  
ATOM   2456  O4'  DC A  78     -13.164 -37.379 -29.120  3.00  0.00           O  
ATOM   2457  C3'  DC A  78     -12.339 -35.726 -30.660  0.00  0.00           C  
ATOM   2458  O3'  DC A  78     -11.739 -34.582 -30.150  2.00  0.00           O  
ATOM   2459  C2'  DC A  78     -11.396 -36.903 -30.490  4.00  0.00           C  
ATOM   2460  C1'  DC A  78     -11.778 -37.402 -29.100  0.00  0.00           C  
ATOM   2461  N1   DC A  78     -11.275 -38.769 -28.910  6.00  0.00           N  
ATOM   2462  C2   DC A  78     -10.251 -38.871 -27.970  4.00  0.00           C  
ATOM   2463  O2   DC A  78      -9.754 -37.981 -27.340  5.00  0.00           O  
ATOM   2464  N3   DC A  78      -9.810 -40.102 -27.710  1.00  0.00           N  
ATOM   2465  C4   DC A  78     -10.212 -41.147 -28.420  0.00  0.00           C  
ATOM   2466  N4   DC A  78      -9.590 -42.261 -28.170  6.00  0.00           N  
ATOM   2467  C5   DC A  78     -11.258 -41.052 -29.420  8.00  0.00           C  
ATOM   2468  C6   DC A  78     -11.794 -39.853 -29.570  3.00  0.00           C  
ATOM   2469  OP1  DC A  78     -14.214 -38.925 -33.640  5.00  0.00           O  
ATOM   2470  OP2  DC A  78     -16.439 -38.031 -32.690  2.00  0.00           O1-
ATOM   2471  H5   DC A  78     -11.686 -41.952 -29.840  6.00  0.00           H  
ATOM   2472  H6   DC A  78     -12.552 -39.668 -30.320  0.00  0.00           H  
ATOM   2473  H1'  DC A  78     -11.419 -36.848 -28.280  2.00  0.00           H  
ATOM   2474  H2'  DC A  78     -11.474 -37.630 -31.250  4.00  0.00           H  
ATOM   2475  H3'  DC A  78     -12.646 -35.525 -31.770  5.00  0.00           H  
ATOM   2476  H4'  DC A  78     -13.686 -35.451 -29.160  8.00  0.00           H  
ATOM   2477  H41  DC A  78      -8.822 -42.350 -27.590  0.00  0.00           H  
ATOM   2478  H5'  DC A  78     -15.523 -37.000 -30.280  4.00  0.00           H  
ATOM   2479  H42  DC A  78      -9.749 -42.931 -28.880  5.00  0.00           H  
ATOM   2480 H2''  DC A  78     -10.385 -36.544 -30.490  0.00  0.00           H  
ATOM   2481 H5''  DC A  78     -15.132 -35.740 -31.300  0.00  0.00           H  
ATOM   2482  P    DT A  79     -11.267 -33.380 -31.090  9.00  0.00           P  
ATOM   2483  C5'  DT A  79     -13.406 -33.090 -32.570  1.00  0.00           C  
ATOM   2484  O5'  DT A  79     -12.486 -32.494 -31.680  6.00  0.00           O  
ATOM   2485  C4'  DT A  79     -14.371 -32.194 -33.300  5.00  0.00           C  
ATOM   2486  O4'  DT A  79     -15.290 -31.696 -32.300  9.00  0.00           O  
ATOM   2487  C3'  DT A  79     -13.790 -31.001 -34.010  5.00  0.00           C  
ATOM   2488  O3'  DT A  79     -14.582 -30.802 -35.190  9.00  0.00           O  
ATOM   2489  C2'  DT A  79     -13.934 -29.878 -33.010  3.00  0.00           C  
ATOM   2490  C1'  DT A  79     -15.363 -30.262 -32.510  5.00  0.00           C  
ATOM   2491  N1   DT A  79     -15.700 -29.481 -31.290  4.00  0.00           N  
ATOM   2492  C2   DT A  79     -16.798 -28.645 -31.410  6.00  0.00           C  
ATOM   2493  O2   DT A  79     -17.617 -28.755 -32.300  2.00  0.00           O  
ATOM   2494  N3   DT A  79     -16.991 -27.745 -30.410  6.00  0.00           N  
ATOM   2495  C4   DT A  79     -16.332 -27.799 -29.200  6.00  0.00           C  
ATOM   2496  O4   DT A  79     -16.824 -27.137 -28.340  5.00  0.00           O  
ATOM   2497  C5   DT A  79     -15.182 -28.691 -29.160  4.00  0.00           C  
ATOM   2498  C6   DT A  79     -14.939 -29.564 -30.160  5.00  0.00           C  
ATOM   2499  C7   DT A  79     -14.227 -28.615 -27.960  3.00  0.00           C  
ATOM   2500  OP1  DT A  79     -10.521 -32.471 -30.180  5.00  0.00           O  
ATOM   2501  OP2  DT A  79     -10.589 -34.051 -32.190  3.00  0.00           O1-
ATOM   2502  H3   DT A  79     -17.831 -27.140 -30.390  9.00  0.00           H  
ATOM   2503  H6   DT A  79     -14.124 -30.266 -30.040  9.00  0.00           H  
ATOM   2504  H1'  DT A  79     -16.066 -29.983 -33.280  8.00  0.00           H  
ATOM   2505  H2'  DT A  79     -13.107 -29.817 -32.330  3.00  0.00           H  
ATOM   2506  H3'  DT A  79     -12.780 -31.270 -34.220  4.00  0.00           H  
ATOM   2507  H4'  DT A  79     -15.002 -32.721 -34.000  9.00  0.00           H  
ATOM   2508  H5'  DT A  79     -13.974 -33.861 -32.050  4.00  0.00           H  
ATOM   2509  H71  DT A  79     -14.374 -27.716 -27.330  5.00  0.00           H  
ATOM   2510  H72  DT A  79     -14.378 -29.404 -27.230  2.00  0.00           H  
ATOM   2511  H73  DT A  79     -13.127 -28.660 -28.250  2.00  0.00           H  
ATOM   2512 H2''  DT A  79     -13.980 -28.981 -33.610  0.00  0.00           H  
ATOM   2513 H5''  DT A  79     -12.792 -33.609 -33.270  4.00  0.00           H  
ATOM   2514  P    DA A  80     -14.041 -29.869 -36.420  1.00  0.00           P  
ATOM   2515  C5'  DA A  80     -15.930 -28.021 -36.130  2.00  0.00           C  
ATOM   2516  O5'  DA A  80     -14.535 -28.406 -36.110  7.00  0.00           O  
ATOM   2517  C4'  DA A  80     -16.014 -26.634 -35.580  3.00  0.00           C  
ATOM   2518  O4'  DA A  80     -15.855 -26.494 -34.180  6.00  0.00           O  
ATOM   2519  C3'  DA A  80     -15.007 -25.618 -36.190  3.00  0.00           C  
ATOM   2520  O3'  DA A  80     -15.621 -24.272 -36.410  0.00  0.00           O  
ATOM   2521  C2'  DA A  80     -13.869 -25.468 -35.160  0.00  0.00           C  
ATOM   2522  C1'  DA A  80     -14.819 -25.527 -33.900  3.00  0.00           C  
ATOM   2523  N1   DA A  80     -14.963 -24.418 -28.900  6.00  0.00           N  
ATOM   2524  C2   DA A  80     -15.724 -24.044 -29.930  6.00  0.00           C  
ATOM   2525  N3   DA A  80     -15.524 -24.405 -31.230  7.00  0.00           N  
ATOM   2526  C4   DA A  80     -14.509 -25.285 -31.440  5.00  0.00           C  
ATOM   2527  C5   DA A  80     -13.646 -25.669 -30.520  8.00  0.00           C  
ATOM   2528  C6   DA A  80     -13.900 -25.148 -29.170  7.00  0.00           C  
ATOM   2529  N6   DA A  80     -13.244 -25.364 -28.070  4.00  0.00           N  
ATOM   2530  N7   DA A  80     -12.677 -26.504 -31.100  5.00  0.00           N  
ATOM   2531  C8   DA A  80     -12.949 -26.486 -32.390  4.00  0.00           C  
ATOM   2532  N9   DA A  80     -14.120 -25.769 -32.580  8.00  0.00           N  
ATOM   2533  OP1  DA A  80     -14.684 -30.353 -37.680  6.00  0.00           O  
ATOM   2534  OP2  DA A  80     -12.549 -29.750 -36.270  1.00  0.00           O1-
ATOM   2535  H2   DA A  80     -16.527 -23.345 -29.680  4.00  0.00           H  
ATOM   2536  H8   DA A  80     -12.458 -27.028 -33.180  7.00  0.00           H  
ATOM   2537  H1'  DA A  80     -15.261 -24.584 -33.740  2.00  0.00           H  
ATOM   2538  H2'  DA A  80     -13.171 -26.279 -35.140  5.00  0.00           H  
ATOM   2539  H3'  DA A  80     -14.595 -25.951 -37.130  3.00  0.00           H  
ATOM   2540  H4'  DA A  80     -16.959 -26.319 -35.940  5.00  0.00           H  
ATOM   2541  H5'  DA A  80     -16.469 -28.741 -35.500  1.00  0.00           H  
ATOM   2542  H61  DA A  80     -13.674 -25.044 -27.260  3.00  0.00           H  
ATOM   2543  H62  DA A  80     -12.397 -25.914 -27.980  9.00  0.00           H  
ATOM   2544 H2''  DA A  80     -13.391 -24.510 -35.290  3.00  0.00           H  
ATOM   2545 H5''  DA A  80     -16.280 -28.052 -37.150  2.00  0.00           H  
ATOM   2546  P    DA A  81     -14.868 -23.135 -37.310  8.00  0.00           P  
ATOM   2547  C5'  DA A  81     -14.858 -21.562 -35.140  6.00  0.00           C  
ATOM   2548  O5'  DA A  81     -14.136 -22.152 -36.260  1.00  0.00           O  
ATOM   2549  C4'  DA A  81     -14.180 -21.405 -33.800  9.00  0.00           C  
ATOM   2550  O4'  DA A  81     -13.670 -22.573 -33.210  1.00  0.00           O  
ATOM   2551  C3'  DA A  81     -12.951 -20.395 -33.780  9.00  0.00           C  
ATOM   2552  O3'  DA A  81     -13.383 -19.053 -33.780  2.00  0.00           O  
ATOM   2553  C2'  DA A  81     -12.316 -20.829 -32.520  3.00  0.00           C  
ATOM   2554  C1'  DA A  81     -12.613 -22.276 -32.290  1.00  0.00           C  
ATOM   2555  N1   DA A  81      -9.118 -24.883 -29.750  7.00  0.00           N  
ATOM   2556  C2   DA A  81     -10.144 -24.117 -29.380  3.00  0.00           C  
ATOM   2557  N3   DA A  81     -11.008 -23.402 -30.150  1.00  0.00           N  
ATOM   2558  C4   DA A  81     -10.641 -23.552 -31.470  0.00  0.00           C  
ATOM   2559  C5   DA A  81      -9.630 -24.274 -32.010  1.00  0.00           C  
ATOM   2560  C6   DA A  81      -8.905 -24.969 -31.070  5.00  0.00           C  
ATOM   2561  N6   DA A  81      -8.038 -25.885 -31.380  5.00  0.00           N  
ATOM   2562  N7   DA A  81      -9.626 -24.164 -33.420  1.00  0.00           N  
ATOM   2563  C8   DA A  81     -10.743 -23.467 -33.690  0.00  0.00           C  
ATOM   2564  N9   DA A  81     -11.392 -23.093 -32.490  7.00  0.00           N  
ATOM   2565  OP1  DA A  81     -15.914 -22.409 -38.040  1.00  0.00           O  
ATOM   2566  OP2  DA A  81     -13.854 -23.852 -38.070  2.00  0.00           O1-
ATOM   2567  H2   DA A  81     -10.432 -24.344 -28.380  4.00  0.00           H  
ATOM   2568  H8   DA A  81     -11.138 -23.325 -34.700  6.00  0.00           H  
ATOM   2569  H1'  DA A  81     -12.973 -22.354 -31.260  3.00  0.00           H  
ATOM   2570  H2'  DA A  81     -11.302 -20.659 -32.550  1.00  0.00           H  
ATOM   2571  H3'  DA A  81     -12.263 -20.535 -34.600  1.00  0.00           H  
ATOM   2572  H4'  DA A  81     -14.950 -20.896 -33.140  9.00  0.00           H  
ATOM   2573  H5'  DA A  81     -15.705 -22.163 -34.980  7.00  0.00           H  
ATOM   2574  H61  DA A  81      -7.565 -26.409 -30.660  5.00  0.00           H  
ATOM   2575  H62  DA A  81      -7.750 -25.959 -32.380  4.00  0.00           H  
ATOM   2576 H2''  DA A  81     -12.706 -20.276 -31.690  6.00  0.00           H  
ATOM   2577 H5''  DA A  81     -15.230 -20.537 -35.490  4.00  0.00           H  
ATOM   2578  P    DC A  82     -12.450 -17.911 -34.410  9.00  0.00           P  
ATOM   2579  C5'  DC A  82     -12.109 -16.946 -31.980  8.00  0.00           C  
ATOM   2580  O5'  DC A  82     -11.503 -17.535 -33.190  5.00  0.00           O  
ATOM   2581  C4'  DC A  82     -11.135 -17.074 -30.780  3.00  0.00           C  
ATOM   2582  O4'  DC A  82     -10.701 -18.402 -30.600  6.00  0.00           O  
ATOM   2583  C3'  DC A  82      -9.867 -16.254 -30.890  8.00  0.00           C  
ATOM   2584  O3'  DC A  82      -9.638 -15.674 -29.590  8.00  0.00           O  
ATOM   2585  C2'  DC A  82      -8.756 -17.233 -31.220  0.00  0.00           C  
ATOM   2586  C1'  DC A  82      -9.317 -18.521 -30.700  3.00  0.00           C  
ATOM   2587  N1   DC A  82      -8.832 -19.789 -31.310  1.00  0.00           N  
ATOM   2588  C2   DC A  82      -7.938 -20.612 -30.550  6.00  0.00           C  
ATOM   2589  O2   DC A  82      -7.792 -20.503 -29.340  2.00  0.00           O  
ATOM   2590  N3   DC A  82      -7.252 -21.652 -31.100  5.00  0.00           N  
ATOM   2591  C4   DC A  82      -7.363 -21.823 -32.380  6.00  0.00           C  
ATOM   2592  N4   DC A  82      -6.792 -22.825 -32.960  5.00  0.00           N  
ATOM   2593  C5   DC A  82      -8.280 -21.042 -33.210  2.00  0.00           C  
ATOM   2594  C6   DC A  82      -8.947 -19.995 -32.660  2.00  0.00           C  
ATOM   2595  OP1  DC A  82     -13.249 -16.710 -34.730  3.00  0.00           O  
ATOM   2596  OP2  DC A  82     -11.738 -18.546 -35.570  0.00  0.00           O1-
ATOM   2597  H5   DC A  82      -8.433 -21.230 -34.290  6.00  0.00           H  
ATOM   2598  H6   DC A  82      -9.505 -19.333 -33.280  2.00  0.00           H  
ATOM   2599  H1'  DC A  82      -8.961 -18.603 -29.690  5.00  0.00           H  
ATOM   2600  H2'  DC A  82      -8.557 -17.257 -32.290  0.00  0.00           H  
ATOM   2601  H3'  DC A  82     -10.099 -15.457 -31.640  8.00  0.00           H  
ATOM   2602  H4'  DC A  82     -11.767 -16.722 -29.940  9.00  0.00           H  
ATOM   2603  H41  DC A  82      -6.331 -23.462 -32.320  5.00  0.00           H  
ATOM   2604  H5'  DC A  82     -13.026 -17.462 -31.750  4.00  0.00           H  
ATOM   2605  H42  DC A  82      -7.020 -22.996 -33.940  2.00  0.00           H  
ATOM   2606 H2''  DC A  82      -7.777 -17.068 -30.710  1.00  0.00           H  
ATOM   2607 H5''  DC A  82     -12.306 -15.933 -32.130  2.00  0.00           H  
ATOM   2608  P    DC A  83      -8.683 -14.403 -29.440  4.00  0.00           P  
ATOM   2609  C5'  DC A  83      -7.293 -15.793 -27.560  0.00  0.00           C  
ATOM   2610  O5'  DC A  83      -7.351 -15.195 -28.950  5.00  0.00           O  
ATOM   2611  C4'  DC A  83      -6.013 -16.485 -27.270  5.00  0.00           C  
ATOM   2612  O4'  DC A  83      -5.863 -17.759 -27.910  8.00  0.00           O  
ATOM   2613  C3'  DC A  83      -4.791 -15.639 -27.520  0.00  0.00           C  
ATOM   2614  O3'  DC A  83      -3.995 -15.637 -26.330  0.00  0.00           O  
ATOM   2615  C2'  DC A  83      -4.092 -16.316 -28.670  4.00  0.00           C  
ATOM   2616  C1'  DC A  83      -4.555 -17.777 -28.510  0.00  0.00           C  
ATOM   2617  N1   DC A  83      -4.393 -18.574 -29.710  0.00  0.00           N  
ATOM   2618  C2   DC A  83      -3.475 -19.648 -29.820  4.00  0.00           C  
ATOM   2619  O2   DC A  83      -2.709 -20.017 -28.900  5.00  0.00           O  
ATOM   2620  N3   DC A  83      -3.434 -20.398 -30.980  4.00  0.00           N  
ATOM   2621  C4   DC A  83      -4.278 -20.101 -31.920  5.00  0.00           C  
ATOM   2622  N4   DC A  83      -4.119 -20.801 -32.940  8.00  0.00           N  
ATOM   2623  C5   DC A  83      -5.132 -18.983 -31.940  3.00  0.00           C  
ATOM   2624  C6   DC A  83      -5.152 -18.268 -30.820  3.00  0.00           C  
ATOM   2625  OP1  DC A  83      -9.197 -13.542 -28.340  3.00  0.00           O  
ATOM   2626  OP2  DC A  83      -8.356 -13.821 -30.750  6.00  0.00           O1-
ATOM   2627  H5   DC A  83      -5.727 -18.665 -32.810  0.00  0.00           H  
ATOM   2628  H6   DC A  83      -5.709 -17.316 -30.860  5.00  0.00           H  
ATOM   2629  H1'  DC A  83      -3.916 -18.167 -27.760  0.00  0.00           H  
ATOM   2630  H2'  DC A  83      -4.546 -15.776 -29.540  4.00  0.00           H  
ATOM   2631  H3'  DC A  83      -5.213 -14.641 -27.750  5.00  0.00           H  
ATOM   2632  H4'  DC A  83      -6.091 -16.707 -26.240  4.00  0.00           H  
ATOM   2633  H41  DC A  83      -3.337 -21.334 -32.950  3.00  0.00           H  
ATOM   2634  H5'  DC A  83      -8.181 -16.441 -27.370  8.00  0.00           H  
ATOM   2635  H42  DC A  83      -4.714 -20.725 -33.740  6.00  0.00           H  
ATOM   2636 H2''  DC A  83      -3.042 -16.132 -28.540  8.00  0.00           H  
ATOM   2637 H5''  DC A  83      -7.388 -14.908 -26.930  0.00  0.00           H  
ATOM   2638  P    DC A  84      -2.659 -14.680 -26.240  0.00  0.00           P  
ATOM   2639  C5'  DC A  84      -1.174 -16.748 -25.960  5.00  0.00           C  
ATOM   2640  O5'  DC A  84      -1.423 -15.590 -26.690  0.00  0.00           O  
ATOM   2641  C4'  DC A  84       0.021 -17.553 -26.510  1.00  0.00           C  
ATOM   2642  O4'  DC A  84      -0.424 -18.245 -27.670  0.00  0.00           O  
ATOM   2643  C3'  DC A  84       1.223 -16.643 -26.940  4.00  0.00           C  
ATOM   2644  O3'  DC A  84       2.349 -17.149 -26.420  5.00  0.00           O  
ATOM   2645  C2'  DC A  84       1.153 -16.725 -28.490  8.00  0.00           C  
ATOM   2646  C1'  DC A  84       0.574 -18.171 -28.670  2.00  0.00           C  
ATOM   2647  N1   DC A  84       0.027 -18.512 -30.050  8.00  0.00           N  
ATOM   2648  C2   DC A  84       0.573 -19.512 -30.840  1.00  0.00           C  
ATOM   2649  O2   DC A  84       1.486 -20.229 -30.390  1.00  0.00           O  
ATOM   2650  N3   DC A  84       0.179 -19.575 -32.170  6.00  0.00           N  
ATOM   2651  C4   DC A  84      -0.747 -18.781 -32.630  0.00  0.00           C  
ATOM   2652  N4   DC A  84      -1.235 -18.990 -33.780  2.00  0.00           N  
ATOM   2653  C5   DC A  84      -1.375 -17.876 -31.820  3.00  0.00           C  
ATOM   2654  C6   DC A  84      -0.960 -17.688 -30.580  8.00  0.00           C  
ATOM   2655  OP1  DC A  84      -2.555 -14.374 -24.790  8.00  0.00           O  
ATOM   2656  OP2  DC A  84      -2.673 -13.571 -27.250  2.00  0.00           O1-
ATOM   2657  H5   DC A  84      -2.171 -17.200 -32.130  2.00  0.00           H  
ATOM   2658  H6   DC A  84      -1.300 -16.946 -29.900  9.00  0.00           H  
ATOM   2659  H1'  DC A  84       1.387 -18.868 -28.450  4.00  0.00           H  
ATOM   2660  H2'  DC A  84       0.531 -15.899 -28.830  3.00  0.00           H  
ATOM   2661  H3'  DC A  84       1.164 -15.597 -26.670  1.00  0.00           H  
ATOM   2662  H4'  DC A  84       0.368 -18.174 -25.730  6.00  0.00           H  
ATOM   2663  H41  DC A  84      -0.794 -19.703 -34.250  5.00  0.00           H  
ATOM   2664  H5'  DC A  84      -2.070 -17.413 -25.880  5.00  0.00           H  
ATOM   2665  H42  DC A  84      -2.041 -18.446 -34.080  8.00  0.00           H  
ATOM   2666 H2''  DC A  84       2.060 -16.643 -29.020  7.00  0.00           H  
ATOM   2667 H5''  DC A  84      -0.971 -16.457 -24.950  3.00  0.00           H  
ATOM   2668  P    DT A  85       3.836 -16.840 -26.760  0.00  0.00           P  
ATOM   2669  C5'  DT A  85       4.437 -19.092 -27.900  5.00  0.00           C  
ATOM   2670  O5'  DT A  85       4.224 -17.644 -28.010  8.00  0.00           O  
ATOM   2671  C4'  DT A  85       5.123 -19.529 -29.210  9.00  0.00           C  
ATOM   2672  O4'  DT A  85       4.140 -19.508 -30.300  4.00  0.00           O  
ATOM   2673  C3'  DT A  85       6.364 -18.736 -29.680  0.00  0.00           C  
ATOM   2674  O3'  DT A  85       7.330 -19.629 -30.320  7.00  0.00           O  
ATOM   2675  C2'  DT A  85       5.707 -17.900 -30.750  1.00  0.00           C  
ATOM   2676  C1'  DT A  85       4.738 -18.906 -31.380  8.00  0.00           C  
ATOM   2677  N1   DT A  85       3.631 -18.299 -32.180  7.00  0.00           N  
ATOM   2678  C2   DT A  85       3.374 -18.949 -33.390  5.00  0.00           C  
ATOM   2679  O2   DT A  85       4.007 -19.946 -33.830  7.00  0.00           O  
ATOM   2680  N3   DT A  85       2.476 -18.317 -34.190  0.00  0.00           N  
ATOM   2681  C4   DT A  85       1.741 -17.240 -33.840  5.00  0.00           C  
ATOM   2682  O4   DT A  85       1.015 -16.897 -34.740  4.00  0.00           O  
ATOM   2683  C5   DT A  85       1.984 -16.654 -32.570  7.00  0.00           C  
ATOM   2684  C6   DT A  85       2.894 -17.217 -31.710  6.00  0.00           C  
ATOM   2685  C7   DT A  85       1.344 -15.321 -32.130  7.00  0.00           C  
ATOM   2686  OP1  DT A  85       4.555 -17.383 -25.590  9.00  0.00           O  
ATOM   2687  OP2  DT A  85       3.979 -15.419 -27.260  9.00  0.00           O1-
ATOM   2688  H3   DT A  85       2.123 -18.916 -34.910  9.00  0.00           H  
ATOM   2689  H6   DT A  85       3.236 -16.722 -30.830  4.00  0.00           H  
ATOM   2690  H1'  DT A  85       5.315 -19.597 -31.970  1.00  0.00           H  
ATOM   2691  H2'  DT A  85       5.157 -17.050 -30.280  1.00  0.00           H  
ATOM   2692  H3'  DT A  85       6.809 -18.081 -28.930  0.00  0.00           H  
ATOM   2693  H4'  DT A  85       5.512 -20.501 -28.990  6.00  0.00           H  
ATOM   2694  H5'  DT A  85       3.493 -19.681 -27.690  3.00  0.00           H  
ATOM   2695  H71  DT A  85       1.158 -15.084 -31.110  9.00  0.00           H  
ATOM   2696  H72  DT A  85       1.929 -14.502 -32.540  4.00  0.00           H  
ATOM   2697  H73  DT A  85       0.367 -15.263 -32.670  9.00  0.00           H  
ATOM   2698 H2''  DT A  85       6.491 -17.483 -31.350  9.00  0.00           H  
ATOM   2699 H5''  DT A  85       5.230 -19.235 -27.170  1.00  0.00           H  
ATOM   2700  P    DA A  86       8.785 -19.164 -30.620  8.00  0.00           P  
ATOM   2701  C5'  DA A  86       9.416 -21.388 -31.930  4.00  0.00           C  
ATOM   2702  O5'  DA A  86       9.196 -19.951 -31.960  7.00  0.00           O  
ATOM   2703  C4'  DA A  86       9.533 -22.073 -33.300  5.00  0.00           C  
ATOM   2704  O4'  DA A  86       8.378 -21.905 -34.050  3.00  0.00           O  
ATOM   2705  C3'  DA A  86      10.730 -21.616 -34.190  0.00  0.00           C  
ATOM   2706  O3'  DA A  86      11.170 -22.725 -35.020  8.00  0.00           O  
ATOM   2707  C2'  DA A  86      10.078 -20.652 -35.160  6.00  0.00           C  
ATOM   2708  C1'  DA A  86       8.650 -21.149 -35.210  9.00  0.00           C  
ATOM   2709  N1   DA A  86       4.577 -19.633 -37.900  1.00  0.00           N  
ATOM   2710  C2   DA A  86       5.176 -20.812 -37.850  6.00  0.00           C  
ATOM   2711  N3   DA A  86       6.213 -21.112 -37.070  9.00  0.00           N  
ATOM   2712  C4   DA A  86       6.513 -20.153 -36.180  0.00  0.00           C  
ATOM   2713  C5   DA A  86       5.872 -18.928 -36.050  7.00  0.00           C  
ATOM   2714  C6   DA A  86       4.837 -18.727 -37.010  3.00  0.00           C  
ATOM   2715  N6   DA A  86       4.118 -17.576 -37.070  2.00  0.00           N  
ATOM   2716  N7   DA A  86       6.382 -18.205 -34.960  7.00  0.00           N  
ATOM   2717  C8   DA A  86       7.432 -18.898 -34.650  6.00  0.00           C  
ATOM   2718  N9   DA A  86       7.558 -20.114 -35.300  0.00  0.00           N  
ATOM   2719  OP1  DA A  86       9.665 -19.627 -29.620  3.00  0.00           O  
ATOM   2720  OP2  DA A  86       8.818 -17.691 -30.970  4.00  0.00           O1-
ATOM   2721  H2   DA A  86       4.915 -21.517 -38.550  5.00  0.00           H  
ATOM   2722  H8   DA A  86       7.955 -18.673 -33.720  5.00  0.00           H  
ATOM   2723  H1'  DA A  86       8.578 -21.771 -36.060  4.00  0.00           H  
ATOM   2724  H2'  DA A  86       9.993 -19.561 -34.910  6.00  0.00           H  
ATOM   2725  H3'  DA A  86      11.442 -21.134 -33.560  1.00  0.00           H  
ATOM   2726  H4'  DA A  86       9.623 -23.071 -33.060  1.00  0.00           H  
ATOM   2727  H5'  DA A  86       8.613 -21.973 -31.390  7.00  0.00           H  
ATOM   2728  H61  DA A  86       3.485 -17.444 -37.830  9.00  0.00           H  
ATOM   2729  H62  DA A  86       4.238 -16.855 -36.400  3.00  0.00           H  
ATOM   2730 H2''  DA A  86      10.356 -20.624 -36.160  2.00  0.00           H  
ATOM   2731 H5''  DA A  86      10.309 -21.594 -31.260  2.00  0.00           H  
ATOM   2732  P    DA A  87      12.516 -22.779 -35.850  4.00  0.00           P  
ATOM   2733  C5'  DA A  87      11.063 -22.757 -37.950  4.00  0.00           C  
ATOM   2734  O5'  DA A  87      12.121 -22.019 -37.230  8.00  0.00           O  
ATOM   2735  C4'  DA A  87      10.314 -21.919 -39.060  2.00  0.00           C  
ATOM   2736  O4'  DA A  87       9.416 -20.962 -38.490  4.00  0.00           O  
ATOM   2737  C3'  DA A  87      11.122 -21.300 -40.210  4.00  0.00           C  
ATOM   2738  O3'  DA A  87      10.947 -22.041 -41.430  1.00  0.00           O  
ATOM   2739  C2'  DA A  87      10.519 -19.929 -40.240  1.00  0.00           C  
ATOM   2740  C1'  DA A  87       9.164 -20.149 -39.630  9.00  0.00           C  
ATOM   2741  N1   DA A  87       5.046 -17.049 -40.760  7.00  0.00           N  
ATOM   2742  C2   DA A  87       5.438 -18.211 -41.320  2.00  0.00           C  
ATOM   2743  N3   DA A  87       6.496 -18.902 -41.000  7.00  0.00           N  
ATOM   2744  C4   DA A  87       7.286 -18.359 -39.970  5.00  0.00           C  
ATOM   2745  C5   DA A  87       7.005 -17.210 -39.290  4.00  0.00           C  
ATOM   2746  C6   DA A  87       5.826 -16.552 -39.730  7.00  0.00           C  
ATOM   2747  N6   DA A  87       5.422 -15.416 -39.220  6.00  0.00           N  
ATOM   2748  N7   DA A  87       7.952 -16.926 -38.280  8.00  0.00           N  
ATOM   2749  C8   DA A  87       8.736 -17.960 -38.330  0.00  0.00           C  
ATOM   2750  N9   DA A  87       8.421 -18.866 -39.330  7.00  0.00           N  
ATOM   2751  OP1  DA A  87      12.915 -24.205 -36.210  8.00  0.00           O  
ATOM   2752  OP2  DA A  87      13.471 -21.968 -35.140  0.00  0.00           O1-
ATOM   2753  H2   DA A  87       4.874 -18.479 -42.250  5.00  0.00           H  
ATOM   2754  H8   DA A  87       9.566 -18.068 -37.630  2.00  0.00           H  
ATOM   2755  H1'  DA A  87       8.555 -20.662 -40.340  9.00  0.00           H  
ATOM   2756  H2'  DA A  87      11.140 -19.247 -39.670  5.00  0.00           H  
ATOM   2757  H3'  DA A  87      12.179 -21.323 -39.950  4.00  0.00           H  
ATOM   2758  H4'  DA A  87       9.724 -22.582 -39.610  4.00  0.00           H  
ATOM   2759  H5'  DA A  87      10.314 -23.130 -37.310  5.00  0.00           H  
ATOM   2760  H61  DA A  87       4.537 -14.991 -39.570  0.00  0.00           H  
ATOM   2761  H62  DA A  87       5.846 -15.062 -38.360  0.00  0.00           H  
ATOM   2762 H2''  DA A  87      10.367 -19.565 -41.280  7.00  0.00           H  
ATOM   2763 H5''  DA A  87      11.540 -23.687 -38.380  5.00  0.00           H  
ATOM   2764  P    DC A  88      11.788 -21.681 -42.740  8.00  0.00           P  
ATOM   2765  C5'  DC A  88       9.578 -21.780 -44.220  1.00  0.00           C  
ATOM   2766  O5'  DC A  88      10.679 -20.991 -43.680  4.00  0.00           O  
ATOM   2767  C4'  DC A  88       8.648 -20.954 -45.050  9.00  0.00           C  
ATOM   2768  O4'  DC A  88       8.021 -20.005 -44.270  3.00  0.00           O  
ATOM   2769  C3'  DC A  88       9.307 -20.329 -46.320  1.00  0.00           C  
ATOM   2770  O3'  DC A  88       8.486 -20.637 -47.430  3.00  0.00           O  
ATOM   2771  C2'  DC A  88       9.286 -18.838 -45.950  4.00  0.00           C  
ATOM   2772  C1'  DC A  88       8.054 -18.834 -45.000  4.00  0.00           C  
ATOM   2773  N1   DC A  88       7.931 -17.693 -44.000  8.00  0.00           N  
ATOM   2774  C2   DC A  88       6.857 -16.749 -44.150  0.00  0.00           C  
ATOM   2775  O2   DC A  88       5.921 -16.944 -44.920  4.00  0.00           O  
ATOM   2776  N3   DC A  88       6.839 -15.584 -43.410  0.00  0.00           N  
ATOM   2777  C4   DC A  88       7.716 -15.384 -42.490  8.00  0.00           C  
ATOM   2778  N4   DC A  88       7.673 -14.254 -41.800  5.00  0.00           N  
ATOM   2779  C5   DC A  88       8.744 -16.363 -42.310  3.00  0.00           C  
ATOM   2780  C6   DC A  88       8.784 -17.500 -43.070  2.00  0.00           C  
ATOM   2781  OP1  DC A  88      12.207 -22.985 -43.360  4.00  0.00           O  
ATOM   2782  OP2  DC A  88      12.826 -20.710 -42.450  2.00  0.00           O1-
ATOM   2783  H5   DC A  88       9.479 -16.350 -41.590  5.00  0.00           H  
ATOM   2784  H6   DC A  88       9.640 -18.225 -43.040  4.00  0.00           H  
ATOM   2785  H1'  DC A  88       7.107 -18.698 -45.620  5.00  0.00           H  
ATOM   2786  H2'  DC A  88      10.177 -18.557 -45.320  0.00  0.00           H  
ATOM   2787  H3'  DC A  88      10.367 -20.670 -46.470  2.00  0.00           H  
ATOM   2788  H4'  DC A  88       7.946 -21.697 -45.360  8.00  0.00           H  
ATOM   2789  H41  DC A  88       6.946 -13.538 -42.150  1.00  0.00           H  
ATOM   2790  H5'  DC A  88       9.028 -22.066 -43.320  4.00  0.00           H  
ATOM   2791  H42  DC A  88       8.295 -14.024 -41.110  4.00  0.00           H  
ATOM   2792 H2''  DC A  88       9.234 -18.140 -46.770  3.00  0.00           H  
ATOM   2793 H5''  DC A  88       9.904 -22.602 -44.740  4.00  0.00           H  
ATOM   2794  P    DC A  89       8.739 -20.086 -48.950  5.00  0.00           P  
ATOM   2795  C5'  DC A  89       6.386 -18.856 -49.170  0.00  0.00           C  
ATOM   2796  O5'  DC A  89       7.808 -18.808 -49.020  2.00  0.00           O  
ATOM   2797  C4'  DC A  89       5.751 -17.411 -49.310  0.00  0.00           C  
ATOM   2798  O4'  DC A  89       5.888 -16.645 -48.150  6.00  0.00           O  
ATOM   2799  C3'  DC A  89       6.283 -16.555 -50.500  7.00  0.00           C  
ATOM   2800  O3'  DC A  89       5.303 -15.917 -51.300  3.00  0.00           O  
ATOM   2801  C2'  DC A  89       7.141 -15.544 -49.750  1.00  0.00           C  
ATOM   2802  C1'  DC A  89       6.307 -15.354 -48.500  8.00  0.00           C  
ATOM   2803  N1   DC A  89       7.089 -14.676 -47.380  3.00  0.00           N  
ATOM   2804  C2   DC A  89       6.770 -13.311 -47.090  1.00  0.00           C  
ATOM   2805  O2   DC A  89       5.831 -12.715 -47.640  4.00  0.00           O  
ATOM   2806  N3   DC A  89       7.416 -12.692 -46.080  5.00  0.00           N  
ATOM   2807  C4   DC A  89       8.365 -13.338 -45.470  4.00  0.00           C  
ATOM   2808  N4   DC A  89       8.679 -12.740 -44.400  7.00  0.00           N  
ATOM   2809  C5   DC A  89       8.861 -14.625 -45.830  3.00  0.00           C  
ATOM   2810  C6   DC A  89       8.146 -15.312 -46.790  3.00  0.00           C  
ATOM   2811  OP1  DC A  89       8.139 -21.066 -49.940  8.00  0.00           O  
ATOM   2812  OP2  DC A  89      10.147 -19.719 -49.090  4.00  0.00           O1-
ATOM   2813  H5   DC A  89       9.626 -15.168 -45.320  8.00  0.00           H  
ATOM   2814  H6   DC A  89       8.460 -16.293 -47.110  7.00  0.00           H  
ATOM   2815  H1'  DC A  89       5.473 -14.776 -48.860  3.00  0.00           H  
ATOM   2816  H2'  DC A  89       8.111 -16.003 -49.510  4.00  0.00           H  
ATOM   2817  H3'  DC A  89       6.872 -17.187 -51.140  7.00  0.00           H  
ATOM   2818  H4'  DC A  89       4.721 -17.562 -49.520  9.00  0.00           H  
ATOM   2819  H41  DC A  89       8.280 -11.797 -44.180  7.00  0.00           H  
ATOM   2820  H5'  DC A  89       6.011 -19.287 -48.280  3.00  0.00           H  
ATOM   2821  H42  DC A  89       9.284 -13.200 -43.820  6.00  0.00           H  
ATOM   2822 H2''  DC A  89       7.333 -14.616 -50.320  9.00  0.00           H  
ATOM   2823 H5''  DC A  89       6.062 -19.500 -49.990  4.00  0.00           H  
ATOM   2824  P   DC3 A  90       5.589 -14.830 -52.470  6.00  0.00           P  
ATOM   2825  C5' DC3 A  90       4.250 -12.762 -51.680  8.00  0.00           C  
ATOM   2826  O5' DC3 A  90       5.527 -13.410 -51.890  3.00  0.00           O  
ATOM   2827  C4' DC3 A  90       4.461 -11.335 -51.300  3.00  0.00           C  
ATOM   2828  O4' DC3 A  90       5.264 -11.186 -50.100  3.00  0.00           O  
ATOM   2829  C3' DC3 A  90       5.128 -10.503 -52.400  3.00  0.00           C  
ATOM   2830  O3' DC3 A  90       4.377  -9.301 -52.670  5.00  0.00           O  
ATOM   2831  C2' DC3 A  90       6.455 -10.132 -51.730  7.00  0.00           C  
ATOM   2832  C1' DC3 A  90       6.048 -10.035 -50.210  9.00  0.00           C  
ATOM   2833  N1  DC3 A  90       7.185 -10.098 -49.220  8.00  0.00           N  
ATOM   2834  C2  DC3 A  90       7.316  -9.042 -48.350  7.00  0.00           C  
ATOM   2835  O2  DC3 A  90       6.547  -8.116 -48.380  3.00  0.00           O  
ATOM   2836  N3  DC3 A  90       8.432  -9.013 -47.560  6.00  0.00           N  
ATOM   2837  C4  DC3 A  90       9.216 -10.025 -47.480  1.00  0.00           C  
ATOM   2838  N4  DC3 A  90      10.182  -9.993 -46.610  5.00  0.00           N  
ATOM   2839  C5  DC3 A  90       9.042 -11.116 -48.330  4.00  0.00           C  
ATOM   2840  C6  DC3 A  90       8.032 -11.144 -49.250  4.00  0.00           C  
ATOM   2841  OP1 DC3 A  90       4.460 -14.972 -53.480  4.00  0.00           O  
ATOM   2842  OP2 DC3 A  90       6.964 -15.121 -52.950  6.00  0.00           O  
ATOM   2843 HO3' DC3 A  90       4.779  -8.963 -53.490  0.00  0.00           H  
ATOM   2844  H5  DC3 A  90       9.702 -11.986 -48.340  4.00  0.00           H  
ATOM   2845  H6  DC3 A  90       7.848 -11.996 -49.900  6.00  0.00           H  
ATOM   2846  H1' DC3 A  90       5.465  -9.119 -50.050  1.00  0.00           H  
ATOM   2847  H2' DC3 A  90       7.188 -11.004 -51.780  7.00  0.00           H  
ATOM   2848  H3' DC3 A  90       5.201 -11.044 -53.380  7.00  0.00           H  
ATOM   2849  H4' DC3 A  90       3.473 -10.948 -51.170  3.00  0.00           H  
ATOM   2850  H41 DC3 A  90      10.328  -9.216 -46.090  4.00  0.00           H  
ATOM   2851  H5' DC3 A  90       3.616 -13.236 -50.970  3.00  0.00           H  
ATOM   2852  H42 DC3 A  90      10.760 -10.823 -46.680  8.00  0.00           H  
ATOM   2853 H2'' DC3 A  90       6.797  -9.124 -52.110  8.00  0.00           H  
ATOM   2854 H5'' DC3 A  90       3.746 -12.752 -52.690  4.00  0.00           H  
ATOM   2855  C   CNT A 208     -13.289   6.638 -55.570  5.00  0.00           C  
ATOM   2856  C   CNT A 208     -14.446   7.005 -54.870  0.00  0.00           C  
ATOM   2857  C   CNT A 208     -14.655   6.291 -53.670  4.00  0.00           C  
ATOM   2858  C   CNT A 208     -15.814   6.533 -52.900  4.00  0.00           C  
ATOM   2859  C   CNT A 208     -15.496   7.858 -55.310  3.00  0.00           C  
ATOM   2860  C   CNT A 208     -16.775   7.873 -54.720  1.00  0.00           C  
ATOM   2861  C   CNT A 208     -16.893   7.224 -53.480  5.00  0.00           C  
ATOM   2862  C   CNT A 208     -18.197   6.993 -52.930  2.00  0.00           C  
ATOM   2863  C   CNT A 208     -18.014   8.119 -55.380  3.00  0.00           C  
ATOM   2864  C   CNT A 208     -19.272   7.586 -55.060  0.00  0.00           C  
ATOM   2865  C   CNT A 208     -19.333   7.051 -53.760  3.00  0.00           C  
ATOM   2866  C   CNT A 208     -20.537   6.421 -53.310  1.00  0.00           C  
ATOM   2867  C   CNT A 208     -20.498   7.589 -55.770  9.00  0.00           C  
ATOM   2868  C   CNT A 208     -21.546   6.651 -55.520  0.00  0.00           C  
ATOM   2869  C   CNT A 208     -21.543   6.099 -54.240  4.00  0.00           C  
ATOM   2870  C   CNT A 208     -22.555   5.154 -53.900  8.00  0.00           C  
ATOM   2871  C   CNT A 208     -22.597   6.260 -56.290  0.00  0.00           C  
ATOM   2872  C   CNT A 208     -23.420   5.131 -56.190  6.00  0.00           C  
ATOM   2873  C   CNT A 208     -23.305   4.561 -54.910  4.00  0.00           C  
ATOM   2874  C   CNT A 208     -24.093   3.446 -54.550  9.00  0.00           C  
ATOM   2875  C   CNT A 208     -24.338   4.462 -57.090  8.00  0.00           C  
ATOM   2876  C   CNT A 208     -24.685   3.103 -56.910  5.00  0.00           C  
ATOM   2877  C   CNT A 208     -24.531   2.554 -55.570  9.00  0.00           C  
ATOM   2878  C   CNT A 208     -24.835   1.235 -55.260  1.00  0.00           C  
ATOM   2879  C   CNT A 208     -25.007   2.157 -57.900  1.00  0.00           C  
ATOM   2880  C   CNT A 208     -24.946   0.804 -57.690  4.00  0.00           C  
ATOM   2881  C   CNT A 208     -25.210   0.351 -56.330  6.00  0.00           C  
ATOM   2882  C   CNT A 208     -25.331  -1.012 -56.040  7.00  0.00           C  
ATOM   2883  C   CNT A 208     -25.120  -0.273 -58.640  8.00  0.00           C  
ATOM   2884  C   CNT A 208     -24.997  -1.646 -58.340  8.00  0.00           C  
ATOM   2885  C   CNT A 208     -25.130  -2.027 -56.960  3.00  0.00           C  
ATOM   2886  C   CNT A 208     -24.901  -3.382 -56.610  5.00  0.00           C  
ATOM   2887  C   CNT A 208     -24.936  -2.656 -59.280  5.00  0.00           C  
ATOM   2888  C   CNT A 208     -24.687  -3.986 -58.990  9.00  0.00           C  
ATOM   2889  C   CNT A 208     -24.714  -4.323 -57.610  6.00  0.00           C  
ATOM   2890  C   CNT A 208     -24.107  -5.599 -57.210  7.00  0.00           C  
ATOM   2891  C   CNT A 208     -24.420  -5.062 -59.830  9.00  0.00           C  
ATOM   2892  C   CNT A 208     -23.583  -6.122 -59.560  7.00  0.00           C  
ATOM   2893  C   CNT A 208     -23.495  -6.472 -58.170  2.00  0.00           C  
ATOM   2894  C   CNT A 208     -22.571  -7.420 -57.710  3.00  0.00           C  
ATOM   2895  C   CNT A 208     -22.689  -6.902 -60.370  8.00  0.00           C  
ATOM   2896  C   CNT A 208     -21.554  -7.591 -59.960  1.00  0.00           C  
ATOM   2897  C   CNT A 208     -21.598  -7.896 -58.590  5.00  0.00           C  
ATOM   2898  C   CNT A 208     -20.412  -8.427 -57.950  9.00  0.00           C  
ATOM   2899  C   CNT A 208     -20.392  -7.951 -60.630  5.00  0.00           C  
ATOM   2900  C   CNT A 208     -19.120  -8.196 -60.020  7.00  0.00           C  
ATOM   2901  C   CNT A 208     -19.157  -8.433 -58.590  5.00  0.00           C  
ATOM   2902  C   CNT A 208     -17.985  -8.405 -57.810  6.00  0.00           C  
ATOM   2903  C   CNT A 208     -17.811  -8.166 -60.470  8.00  0.00           C  
ATOM   2904  C   CNT A 208     -16.704  -7.691 -59.780  3.00  0.00           C  
ATOM   2905  C   CNT A 208     -16.775  -7.982 -58.380  2.00  0.00           C  
ATOM   2906  C   CNT A 208     -15.684  -7.600 -57.540  0.00  0.00           C  
ATOM   2907  C   CNT A 208     -15.575  -6.996 -60.160  9.00  0.00           C  
ATOM   2908  C   CNT A 208     -14.708  -6.214 -59.350  6.00  0.00           C  
ATOM   2909  C   CNT A 208     -14.814  -6.537 -57.940  1.00  0.00           C  
ATOM   2910  C   CNT A 208     -14.010  -5.916 -56.980  4.00  0.00           C  
ATOM   2911  C   CNT A 208     -13.879  -5.141 -59.540  9.00  0.00           C  
ATOM   2912  C   CNT A 208     -12.964  -4.536 -58.610  6.00  0.00           C  
ATOM   2913  C   CNT A 208     -13.128  -4.835 -57.300  4.00  0.00           C  
ATOM   2914  C   CNT A 208     -12.300  -4.237 -56.330  4.00  0.00           C  
ATOM   2915  C   CNT A 208     -12.076  -3.548 -58.960  7.00  0.00           C  
ATOM   2916  C   CNT A 208     -11.204  -2.814 -58.070  3.00  0.00           C  
ATOM   2917  C   CNT A 208     -11.449  -3.137 -56.730  0.00  0.00           C  
ATOM   2918  C   CNT A 208     -10.899  -2.361 -55.700  6.00  0.00           C  
ATOM   2919  C   CNT A 208     -10.417  -1.674 -58.310  8.00  0.00           C  
ATOM   2920  C   CNT A 208     -10.181  -0.666 -57.290  3.00  0.00           C  
ATOM   2921  C   CNT A 208     -10.388  -1.112 -55.980  7.00  0.00           C  
ATOM   2922  C   CNT A 208     -10.349  -0.125 -54.910  1.00  0.00           C  
ATOM   2923  C   CNT A 208      -9.669   0.674 -57.360  5.00  0.00           C  
ATOM   2924  C   CNT A 208      -9.945   1.734 -56.490  6.00  0.00           C  
ATOM   2925  C   CNT A 208     -10.204   1.323 -55.180  3.00  0.00           C  
ATOM   2926  C   CNT A 208     -10.477   2.188 -54.100  2.00  0.00           C  
ATOM   2927  C   CNT A 208     -10.107   3.053 -56.770  9.00  0.00           C  
ATOM   2928  C   CNT A 208     -10.676   3.954 -55.720  9.00  0.00           C  
ATOM   2929  C   CNT A 208     -10.874   3.497 -54.410  2.00  0.00           C  
ATOM   2930  C   CNT A 208     -11.718   4.129 -53.470  2.00  0.00           C  
ATOM   2931  C   CNT A 208     -11.067   5.295 -55.840  4.00  0.00           C  
ATOM   2932  C   CNT A 208     -12.204   5.839 -55.110  2.00  0.00           C  
ATOM   2933  C   CNT A 208     -12.434   5.265 -53.860  3.00  0.00           C  
ATOM   2934  C   CNT A 208     -13.615   5.536 -53.160  0.00  0.00           C  
ATOM   2935  C   CNT A 208     -13.696   5.074 -51.820  0.00  0.00           C  
ATOM   2936  C   CNT A 208     -14.804   5.449 -51.040  0.00  0.00           C  
ATOM   2937  C   CNT A 208     -14.859   4.964 -49.690  5.00  0.00           C  
ATOM   2938  C   CNT A 208     -16.028   5.090 -48.970  5.00  0.00           C  
ATOM   2939  C   CNT A 208     -15.946   5.966 -51.630  5.00  0.00           C  
ATOM   2940  C   CNT A 208     -17.129   5.994 -50.970  1.00  0.00           C  
ATOM   2941  C   CNT A 208     -17.152   5.629 -49.620  1.00  0.00           C  
ATOM   2942  C   CNT A 208     -18.423   5.429 -49.030  5.00  0.00           C  
ATOM   2943  C   CNT A 208     -18.309   6.445 -51.670  5.00  0.00           C  
ATOM   2944  C   CNT A 208     -19.509   5.975 -51.130  2.00  0.00           C  
ATOM   2945  C   CNT A 208     -19.574   5.622 -49.820  8.00  0.00           C  
ATOM   2946  C   CNT A 208     -20.852   5.127 -49.330  6.00  0.00           C  
ATOM   2947  C   CNT A 208     -20.647   5.958 -51.980  6.00  0.00           C  
ATOM   2948  C   CNT A 208     -21.805   5.265 -51.590  3.00  0.00           C  
ATOM   2949  C   CNT A 208     -21.895   4.803 -50.250  8.00  0.00           C  
ATOM   2950  C   CNT A 208     -22.848   3.788 -49.880  9.00  0.00           C  
ATOM   2951  C   CNT A 208     -22.665   4.732 -52.540  2.00  0.00           C  
ATOM   2952  C   CNT A 208     -23.600   3.811 -52.150  6.00  0.00           C  
ATOM   2953  C   CNT A 208     -23.726   3.292 -50.850  2.00  0.00           C  
ATOM   2954  C   CNT A 208     -24.465   2.145 -50.550  4.00  0.00           C  
ATOM   2955  C   CNT A 208     -24.220   2.990 -53.220  7.00  0.00           C  
ATOM   2956  C   CNT A 208     -24.777   1.750 -52.930  1.00  0.00           C  
ATOM   2957  C   CNT A 208     -24.919   1.356 -51.600  7.00  0.00           C  
ATOM   2958  C   CNT A 208     -25.481   0.106 -51.300  8.00  0.00           C  
ATOM   2959  C   CNT A 208     -24.854   0.788 -53.960  5.00  0.00           C  
ATOM   2960  C   CNT A 208     -25.384  -0.513 -53.630  9.00  0.00           C  
ATOM   2961  C   CNT A 208     -25.603  -0.895 -52.310  3.00  0.00           C  
ATOM   2962  C   CNT A 208     -25.817  -2.229 -52.010  0.00  0.00           C  
ATOM   2963  C   CNT A 208     -25.475  -1.448 -54.710  9.00  0.00           C  
ATOM   2964  C   CNT A 208     -25.468  -2.813 -54.360  9.00  0.00           C  
ATOM   2965  C   CNT A 208     -25.485  -3.142 -53.040  8.00  0.00           C  
ATOM   2966  C   CNT A 208     -25.199  -4.516 -52.720  1.00  0.00           C  
ATOM   2967  C   CNT A 208     -25.038  -3.739 -55.300  9.00  0.00           C  
ATOM   2968  C   CNT A 208     -24.773  -5.056 -54.950  4.00  0.00           C  
ATOM   2969  C   CNT A 208     -24.817  -5.450 -53.650  6.00  0.00           C  
ATOM   2970  C   CNT A 208     -24.294  -6.671 -53.220  7.00  0.00           C  
ATOM   2971  C   CNT A 208     -24.164  -5.957 -55.850  3.00  0.00           C  
ATOM   2972  C   CNT A 208     -23.457  -7.061 -55.460  7.00  0.00           C  
ATOM   2973  C   CNT A 208     -23.578  -7.428 -54.180  3.00  0.00           C  
ATOM   2974  C   CNT A 208     -22.614  -8.298 -53.620  0.00  0.00           C  
ATOM   2975  C   CNT A 208     -22.667  -7.770 -56.340  9.00  0.00           C  
ATOM   2976  C   CNT A 208     -21.587  -8.538 -55.820  5.00  0.00           C  
ATOM   2977  C   CNT A 208     -21.587  -8.757 -54.440  4.00  0.00           C  
ATOM   2978  C   CNT A 208     -20.485  -9.429 -53.900  6.00  0.00           C  
ATOM   2979  C   CNT A 208     -20.435  -8.707 -56.530  3.00  0.00           C  
ATOM   2980  C   CNT A 208     -19.212  -8.945 -55.870  8.00  0.00           C  
ATOM   2981  C   CNT A 208     -19.273  -9.369 -54.540  6.00  0.00           C  
ATOM   2982  C   CNT A 208     -18.063  -9.514 -53.870  0.00  0.00           C  
ATOM   2983  C   CNT A 208     -17.973  -8.803 -56.490  5.00  0.00           C  
ATOM   2984  C   CNT A 208     -16.768  -8.831 -55.760  7.00  0.00           C  
ATOM   2985  C   CNT A 208     -16.801  -9.208 -54.360  2.00  0.00           C  
ATOM   2986  C   CNT A 208     -15.686  -8.927 -53.510  7.00  0.00           C  
ATOM   2987  C   CNT A 208     -15.745  -8.007 -56.230  0.00  0.00           C  
ATOM   2988  C   CNT A 208     -14.764  -7.519 -55.300  8.00  0.00           C  
ATOM   2989  C   CNT A 208     -14.746  -8.030 -53.950  2.00  0.00           C  
ATOM   2990  C   CNT A 208     -13.922  -7.411 -53.010  7.00  0.00           C  
ATOM   2991  C   CNT A 208     -13.980  -6.403 -55.650  9.00  0.00           C  
ATOM   2992  C   CNT A 208     -13.181  -5.795 -54.680  7.00  0.00           C  
ATOM   2993  C   CNT A 208     -13.145  -6.304 -53.350  2.00  0.00           C  
ATOM   2994  C   CNT A 208     -12.287  -5.678 -52.380  7.00  0.00           C  
ATOM   2995  C   CNT A 208     -12.405  -4.657 -54.990  5.00  0.00           C  
ATOM   2996  C   CNT A 208     -11.638  -4.012 -54.030  4.00  0.00           C  
ATOM   2997  C   CNT A 208     -11.606  -4.452 -52.710  7.00  0.00           C  
ATOM   2998  C   CNT A 208     -10.873  -3.826 -51.710  3.00  0.00           C  
ATOM   2999  C   CNT A 208     -10.986  -2.835 -54.340  3.00  0.00           C  
ATOM   3000  C   CNT A 208     -10.409  -2.020 -53.330  7.00  0.00           C  
ATOM   3001  C   CNT A 208     -10.503  -2.512 -51.980  3.00  0.00           C  
ATOM   3002  C   CNT A 208     -10.288  -1.604 -50.930  4.00  0.00           C  
ATOM   3003  C   CNT A 208     -10.304  -0.594 -53.610  0.00  0.00           C  
ATOM   3004  C   CNT A 208     -10.379   0.342 -52.540  3.00  0.00           C  
ATOM   3005  C   CNT A 208     -10.403  -0.220 -51.230  9.00  0.00           C  
ATOM   3006  C   CNT A 208     -10.726   0.657 -50.150  9.00  0.00           C  
ATOM   3007  C   CNT A 208     -10.505   1.706 -52.750  4.00  0.00           C  
ATOM   3008  C   CNT A 208     -11.047   2.503 -51.740  4.00  0.00           C  
ATOM   3009  C   CNT A 208     -11.167   1.970 -50.450  0.00  0.00           C  
ATOM   3010  C   CNT A 208     -11.960   2.706 -49.550  7.00  0.00           C  
ATOM   3011  C   CNT A 208     -11.731   3.699 -52.140  3.00  0.00           C  
ATOM   3012  C   CNT A 208     -12.715   4.242 -51.260  4.00  0.00           C  
ATOM   3013  C   CNT A 208     -12.788   3.749 -49.980  3.00  0.00           C  
ATOM   3014  C   CNT A 208     -13.846   4.193 -49.150  8.00  0.00           C  
ATOM   3015  C   CNT A 208     -13.865   3.861 -47.770  3.00  0.00           C  
ATOM   3016  C   CNT A 208     -14.923   4.172 -46.970  3.00  0.00           C  
ATOM   3017  C   CNT A 208     -15.060   3.715 -45.710  0.00  0.00           C  
ATOM   3018  C   CNT A 208     -16.234   3.845 -44.950  2.00  0.00           C  
ATOM   3019  C   CNT A 208     -16.126   4.709 -47.630  5.00  0.00           C  
ATOM   3020  C   CNT A 208     -17.350   4.705 -46.940  5.00  0.00           C  
ATOM   3021  C   CNT A 208     -17.420   4.329 -45.600  9.00  0.00           C  
ATOM   3022  C   CNT A 208     -18.714   4.150 -45.020  0.00  0.00           C  
ATOM   3023  C   CNT A 208     -18.516   5.021 -47.680  8.00  0.00           C  
ATOM   3024  C   CNT A 208     -19.754   4.589 -47.180  6.00  0.00           C  
ATOM   3025  C   CNT A 208     -19.864   4.232 -45.840  7.00  0.00           C  
ATOM   3026  C   CNT A 208     -21.101   3.734 -45.390  8.00  0.00           C  
ATOM   3027  C   CNT A 208     -20.873   4.599 -47.990  3.00  0.00           C  
ATOM   3028  C   CNT A 208     -22.038   3.909 -47.540  9.00  0.00           C  
ATOM   3029  C   CNT A 208     -22.126   3.426 -46.230  5.00  0.00           C  
ATOM   3030  C   CNT A 208     -23.084   2.481 -45.930  1.00  0.00           C  
ATOM   3031  C   CNT A 208     -22.919   3.407 -48.540  9.00  0.00           C  
ATOM   3032  C   CNT A 208     -23.733   2.286 -48.280  8.00  0.00           C  
ATOM   3033  C   CNT A 208     -23.891   1.880 -46.910  3.00  0.00           C  
ATOM   3034  C   CNT A 208     -24.736   0.842 -46.600  5.00  0.00           C  
ATOM   3035  C   CNT A 208     -24.624   1.785 -49.230  8.00  0.00           C  
ATOM   3036  C   CNT A 208     -25.332   0.581 -48.920  5.00  0.00           C  
ATOM   3037  C   CNT A 208     -25.432   0.134 -47.590  9.00  0.00           C  
ATOM   3038  C   CNT A 208     -25.883  -1.140 -47.310  7.00  0.00           C  
ATOM   3039  C   CNT A 208     -25.589  -0.347 -50.000  9.00  0.00           C  
ATOM   3040  C   CNT A 208     -25.734  -1.708 -49.660  9.00  0.00           C  
ATOM   3041  C   CNT A 208     -25.988  -2.116 -48.320  5.00  0.00           C  
ATOM   3042  C   CNT A 208     -26.060  -3.481 -48.000  7.00  0.00           C  
ATOM   3043  C   CNT A 208     -25.843  -2.646 -50.700  9.00  0.00           C  
ATOM   3044  C   CNT A 208     -25.779  -4.026 -50.380  0.00  0.00           C  
ATOM   3045  C   CNT A 208     -26.003  -4.407 -49.030  2.00  0.00           C  
ATOM   3046  C   CNT A 208     -25.585  -5.696 -48.710  4.00  0.00           C  
ATOM   3047  C   CNT A 208     -25.341  -4.933 -51.390  1.00  0.00           C  
ATOM   3048  C   CNT A 208     -24.992  -6.204 -51.000  1.00  0.00           C  
ATOM   3049  C   CNT A 208     -25.116  -6.648 -49.670  7.00  0.00           C  
ATOM   3050  C   CNT A 208     -24.610  -7.914 -49.260  3.00  0.00           C  
ATOM   3051  C   CNT A 208     -24.346  -7.034 -51.870  0.00  0.00           C  
ATOM   3052  C   CNT A 208     -23.655  -8.186 -51.470  1.00  0.00           C  
ATOM   3053  C   CNT A 208     -23.841  -8.688 -50.160  7.00  0.00           C  
ATOM   3054  C   CNT A 208     -22.902  -9.598 -49.620  0.00  0.00           C  
ATOM   3055  C   CNT A 208     -22.698  -8.744 -52.270  3.00  0.00           C  
ATOM   3056  C   CNT A 208     -21.671  -9.505 -51.720  8.00  0.00           C  
ATOM   3057  C   CNT A 208     -21.826 -10.043 -50.440  8.00  0.00           C  
ATOM   3058  C   CNT A 208     -20.679 -10.719 -49.900  4.00  0.00           C  
ATOM   3059  C   CNT A 208     -20.585  -9.812 -52.530  1.00  0.00           C  
ATOM   3060  C   CNT A 208     -19.403 -10.249 -51.900  2.00  0.00           C  
ATOM   3061  C   CNT A 208     -19.466 -10.768 -50.590  8.00  0.00           C  
ATOM   3062  C   CNT A 208     -18.266 -10.929 -49.880  5.00  0.00           C  
ATOM   3063  C   CNT A 208     -18.192  -9.906 -52.510  9.00  0.00           C  
ATOM   3064  C   CNT A 208     -17.011  -9.943 -51.740  7.00  0.00           C  
ATOM   3065  C   CNT A 208     -17.065 -10.439 -50.420  8.00  0.00           C  
ATOM   3066  C   CNT A 208     -16.033 -10.103 -49.540  8.00  0.00           C  
ATOM   3067  C   CNT A 208     -15.797  -9.365 -52.210  3.00  0.00           C  
ATOM   3068  C   CNT A 208     -14.899  -8.871 -51.310  4.00  0.00           C  
ATOM   3069  C   CNT A 208     -14.995  -9.236 -49.930  6.00  0.00           C  
ATOM   3070  C   CNT A 208     -13.944  -8.862 -49.050  9.00  0.00           C  
ATOM   3071  C   CNT A 208     -14.001  -7.892 -51.660  7.00  0.00           C  
ATOM   3072  C   CNT A 208     -13.119  -7.333 -50.720  9.00  0.00           C  
ATOM   3073  C   CNT A 208     -13.110  -7.805 -49.420  6.00  0.00           C  
ATOM   3074  C   CNT A 208     -12.222  -7.266 -48.470  2.00  0.00           C  
ATOM   3075  C   CNT A 208     -12.335  -6.227 -51.040  0.00  0.00           C  
ATOM   3076  C   CNT A 208     -11.546  -5.539 -50.090  7.00  0.00           C  
ATOM   3077  C   CNT A 208     -11.588  -5.970 -48.740  2.00  0.00           C  
ATOM   3078  C   CNT A 208     -11.005  -5.192 -47.790  6.00  0.00           C  
ATOM   3079  C   CNT A 208     -11.037  -4.261 -50.400  0.00  0.00           C  
ATOM   3080  C   CNT A 208     -10.613  -3.413 -49.340  5.00  0.00           C  
ATOM   3081  C   CNT A 208     -10.607  -3.878 -48.010  0.00  0.00           C  
ATOM   3082  C   CNT A 208     -10.552  -2.946 -46.990  7.00  0.00           C  
ATOM   3083  C   CNT A 208     -10.421  -2.027 -49.590  0.00  0.00           C  
ATOM   3084  C   CNT A 208     -10.636  -1.119 -48.530  7.00  0.00           C  
ATOM   3085  C   CNT A 208     -10.655  -1.572 -47.230  0.00  0.00           C  
ATOM   3086  C   CNT A 208     -11.135  -0.711 -46.220  5.00  0.00           C  
ATOM   3087  C   CNT A 208     -10.924   0.192 -48.840  5.00  0.00           C  
ATOM   3088  C   CNT A 208     -11.479   1.032 -47.850  9.00  0.00           C  
ATOM   3089  C   CNT A 208     -11.590   0.569 -46.550  4.00  0.00           C  
ATOM   3090  C   CNT A 208     -12.345   1.277 -45.620  2.00  0.00           C  
ATOM   3091  C   CNT A 208     -12.146   2.200 -48.240  6.00  0.00           C  
ATOM   3092  C   CNT A 208     -12.978   2.852 -47.330  4.00  0.00           C  
ATOM   3093  C   CNT A 208     -13.035   2.424 -46.000  9.00  0.00           C  
ATOM   3094  C   CNT A 208     -14.098   2.826 -45.230  1.00  0.00           C  
ATOM   3095  C   CNT A 208     -14.253   2.280 -43.900  9.00  0.00           C  
ATOM   3096  C   CNT A 208     -15.273   2.710 -43.070  3.00  0.00           C  
ATOM   3097  C   CNT A 208     -15.279   2.375 -41.680  0.00  0.00           C  
ATOM   3098  C   CNT A 208     -16.551   2.492 -41.010  0.00  0.00           C  
ATOM   3099  C   CNT A 208     -16.357   3.372 -43.640  0.00  0.00           C  
ATOM   3100  C   CNT A 208     -17.544   3.454 -43.020  1.00  0.00           C  
ATOM   3101  C   CNT A 208     -17.661   3.033 -41.640  4.00  0.00           C  
ATOM   3102  C   CNT A 208     -18.941   2.868 -41.040  6.00  0.00           C  
ATOM   3103  C   CNT A 208     -18.741   3.667 -43.740  4.00  0.00           C  
ATOM   3104  C   CNT A 208     -19.982   3.371 -43.160  2.00  0.00           C  
ATOM   3105  C   CNT A 208     -20.112   3.118 -41.810  8.00  0.00           C  
ATOM   3106  C   CNT A 208     -21.271   2.417 -41.360  9.00  0.00           C  
ATOM   3107  C   CNT A 208     -21.080   3.292 -44.080  6.00  0.00           C  
ATOM   3108  C   CNT A 208     -22.185   2.476 -43.630  7.00  0.00           C  
ATOM   3109  C   CNT A 208     -22.244   1.971 -42.290  1.00  0.00           C  
ATOM   3110  C   CNT A 208     -23.159   0.994 -41.960  1.00  0.00           C  
ATOM   3111  C   CNT A 208     -23.132   2.066 -44.540  0.00  0.00           C  
ATOM   3112  C   CNT A 208     -24.009   1.006 -44.230  6.00  0.00           C  
ATOM   3113  C   CNT A 208     -24.069   0.542 -42.910  5.00  0.00           C  
ATOM   3114  C   CNT A 208     -24.902  -0.568 -42.600  0.00  0.00           C  
ATOM   3115  C   CNT A 208     -24.872   0.421 -45.230  2.00  0.00           C  
ATOM   3116  C   CNT A 208     -25.642  -0.736 -44.890  6.00  0.00           C  
ATOM   3117  C   CNT A 208     -25.683  -1.152 -43.560  2.00  0.00           C  
ATOM   3118  C   CNT A 208     -26.190  -2.401 -43.230  4.00  0.00           C  
ATOM   3119  C   CNT A 208     -26.081  -1.532 -45.970  4.00  0.00           C  
ATOM   3120  C   CNT A 208     -26.190  -2.915 -45.640  4.00  0.00           C  
ATOM   3121  C   CNT A 208     -26.292  -3.315 -44.280  9.00  0.00           C  
ATOM   3122  C   CNT A 208     -26.464  -4.679 -43.970  3.00  0.00           C  
ATOM   3123  C   CNT A 208     -26.199  -3.891 -46.680  7.00  0.00           C  
ATOM   3124  C   CNT A 208     -26.018  -5.207 -46.330  4.00  0.00           C  
ATOM   3125  C   CNT A 208     -26.202  -5.649 -45.000  7.00  0.00           C  
ATOM   3126  C   CNT A 208     -25.867  -6.988 -44.680  5.00  0.00           C  
ATOM   3127  C   CNT A 208     -25.635  -6.099 -47.330  5.00  0.00           C  
ATOM   3128  C   CNT A 208     -25.211  -7.380 -46.970  0.00  0.00           C  
ATOM   3129  C   CNT A 208     -25.339  -7.822 -45.650  3.00  0.00           C  
ATOM   3130  C   CNT A 208     -24.762  -9.048 -45.250  0.00  0.00           C  
ATOM   3131  C   CNT A 208     -24.520  -8.171 -47.870  5.00  0.00           C  
ATOM   3132  C   CNT A 208     -23.769  -9.280 -47.480  3.00  0.00           C  
ATOM   3133  C   CNT A 208     -23.841  -9.668 -46.140  0.00  0.00           C  
ATOM   3134  C   CNT A 208     -22.894 -10.550 -45.620  7.00  0.00           C  
ATOM   3135  C   CNT A 208     -22.896  -9.950 -48.310  5.00  0.00           C  
ATOM   3136  C   CNT A 208     -21.909 -10.758 -47.780  5.00  0.00           C  
ATOM   3137  C   CNT A 208     -21.891 -11.104 -46.440  6.00  0.00           C  
ATOM   3138  C   CNT A 208     -20.759 -11.715 -45.840  5.00  0.00           C  
ATOM   3139  C   CNT A 208     -20.756 -11.046 -48.510  9.00  0.00           C  
ATOM   3140  C   CNT A 208     -19.575 -11.409 -47.870  8.00  0.00           C  
ATOM   3141  C   CNT A 208     -19.573 -11.893 -46.570  1.00  0.00           C  
ATOM   3142  C   CNT A 208     -18.414 -12.009 -45.840  5.00  0.00           C  
ATOM   3143  C   CNT A 208     -18.321 -11.164 -48.490  6.00  0.00           C  
ATOM   3144  C   CNT A 208     -17.192 -11.152 -47.690  5.00  0.00           C  
ATOM   3145  C   CNT A 208     -17.210 -11.552 -46.350  1.00  0.00           C  
ATOM   3146  C   CNT A 208     -16.097 -11.356 -45.550  2.00  0.00           C  
ATOM   3147  C   CNT A 208     -16.040 -10.552 -48.210  8.00  0.00           C  
ATOM   3148  C   CNT A 208     -14.943 -10.257 -47.340  7.00  0.00           C  
ATOM   3149  C   CNT A 208     -15.062 -10.551 -45.970  1.00  0.00           C  
ATOM   3150  C   CNT A 208     -14.167 -10.040 -44.990  3.00  0.00           C  
ATOM   3151  C   CNT A 208     -13.948  -9.369 -47.760  0.00  0.00           C  
ATOM   3152  C   CNT A 208     -13.066  -8.763 -46.780  2.00  0.00           C  
ATOM   3153  C   CNT A 208     -13.258  -9.088 -45.400  8.00  0.00           C  
ATOM   3154  C   CNT A 208     -12.448  -8.535 -44.420  1.00  0.00           C  
ATOM   3155  C   CNT A 208     -12.204  -7.655 -47.140  0.00  0.00           C  
ATOM   3156  C   CNT A 208     -11.535  -6.919 -46.110  6.00  0.00           C  
ATOM   3157  C   CNT A 208     -11.725  -7.350 -44.780  3.00  0.00           C  
ATOM   3158  C   CNT A 208     -11.225  -6.558 -43.750  9.00  0.00           C  
ATOM   3159  C   CNT A 208     -11.075  -5.595 -46.400  1.00  0.00           C  
ATOM   3160  C   CNT A 208     -10.800  -4.786 -45.310  5.00  0.00           C  
ATOM   3161  C   CNT A 208     -10.922  -5.194 -43.980  8.00  0.00           C  
ATOM   3162  C   CNT A 208     -10.838  -4.269 -42.920  1.00  0.00           C  
ATOM   3163  C   CNT A 208     -10.599  -3.410 -45.650  4.00  0.00           C  
ATOM   3164  C   CNT A 208     -10.771  -2.485 -44.570  3.00  0.00           C  
ATOM   3165  C   CNT A 208     -10.862  -2.912 -43.200  0.00  0.00           C  
ATOM   3166  C   CNT A 208     -11.329  -2.026 -42.200  7.00  0.00           C  
ATOM   3167  C   CNT A 208     -11.077  -1.147 -44.890  3.00  0.00           C  
ATOM   3168  C   CNT A 208     -11.731  -0.382 -43.890  9.00  0.00           C  
ATOM   3169  C   CNT A 208     -11.816  -0.778 -42.580  8.00  0.00           C  
ATOM   3170  C   CNT A 208     -12.474   0.009 -41.620  1.00  0.00           C  
ATOM   3171  C   CNT A 208     -12.352   0.851 -44.310  2.00  0.00           C  
ATOM   3172  C   CNT A 208     -13.207   1.524 -43.400  4.00  0.00           C  
ATOM   3173  C   CNT A 208     -13.255   1.099 -42.090  8.00  0.00           C  
ATOM   3174  C   CNT A 208     -14.277   1.541 -41.220  5.00  0.00           C  
ATOM   3175  C   CNT A 208     -14.449   1.012 -39.900  1.00  0.00           C  
ATOM   3176  C   CNT A 208     -15.529   1.381 -39.120  3.00  0.00           C  
ATOM   3177  C   CNT A 208     -15.573   0.964 -37.750  2.00  0.00           C  
ATOM   3178  C   CNT A 208     -16.745   1.027 -37.050  4.00  0.00           C  
ATOM   3179  C   CNT A 208     -16.657   1.989 -39.710  6.00  0.00           C  
ATOM   3180  C   CNT A 208     -17.877   2.003 -39.040  8.00  0.00           C  
ATOM   3181  C   CNT A 208     -17.871   1.514 -37.740  6.00  0.00           C  
ATOM   3182  C   CNT A 208     -19.110   1.431 -37.070  3.00  0.00           C  
ATOM   3183  C   CNT A 208     -19.015   2.332 -39.760  0.00  0.00           C  
ATOM   3184  C   CNT A 208     -20.261   2.098 -39.190  2.00  0.00           C  
ATOM   3185  C   CNT A 208     -20.281   1.686 -37.790  1.00  0.00           C  
ATOM   3186  C   CNT A 208     -21.455   0.992 -37.350  2.00  0.00           C  
ATOM   3187  C   CNT A 208     -21.385   1.934 -40.020  2.00  0.00           C  
ATOM   3188  C   CNT A 208     -22.477   1.081 -39.630  9.00  0.00           C  
ATOM   3189  C   CNT A 208     -22.538   0.728 -38.280  0.00  0.00           C  
ATOM   3190  C   CNT A 208     -23.494  -0.237 -37.950  1.00  0.00           C  
ATOM   3191  C   CNT A 208     -23.380   0.645 -40.610  3.00  0.00           C  
ATOM   3192  C   CNT A 208     -24.211  -0.428 -40.260  1.00  0.00           C  
ATOM   3193  C   CNT A 208     -24.315  -0.826 -38.880  6.00  0.00           C  
ATOM   3194  C   CNT A 208     -25.248  -1.835 -38.560  1.00  0.00           C  
ATOM   3195  C   CNT A 208     -24.991  -0.999 -41.270  2.00  0.00           C  
ATOM   3196  C   CNT A 208     -25.707  -2.155 -40.890  0.00  0.00           C  
ATOM   3197  C   CNT A 208     -25.920  -2.525 -39.590  4.00  0.00           C  
ATOM   3198  C   CNT A 208     -26.488  -3.736 -39.280  8.00  0.00           C  
ATOM   3199  C   CNT A 208     -26.358  -2.861 -41.890  6.00  0.00           C  
ATOM   3200  C   CNT A 208     -26.792  -4.215 -41.620  1.00  0.00           C  
ATOM   3201  C   CNT A 208     -26.875  -4.640 -40.320  0.00  0.00           C  
ATOM   3202  C   CNT A 208     -26.818  -6.008 -40.000  9.00  0.00           C  
ATOM   3203  C   CNT A 208     -26.660  -5.119 -42.670  5.00  0.00           C  
ATOM   3204  C   CNT A 208     -26.466  -6.498 -42.320  9.00  0.00           C  
ATOM   3205  C   CNT A 208     -26.574  -6.936 -41.010  2.00  0.00           C  
ATOM   3206  C   CNT A 208     -26.168  -8.229 -40.680  3.00  0.00           C  
ATOM   3207  C   CNT A 208     -25.956  -7.388 -43.340  3.00  0.00           C  
ATOM   3208  C   CNT A 208     -25.507  -8.647 -42.980  1.00  0.00           C  
ATOM   3209  C   CNT A 208     -25.498  -9.013 -41.640  2.00  0.00           C  
ATOM   3210  C   CNT A 208     -24.840 -10.172 -41.220  3.00  0.00           C  
ATOM   3211  C   CNT A 208     -24.824  -9.379 -43.900  3.00  0.00           C  
ATOM   3212  C   CNT A 208     -23.951 -10.392 -43.420  5.00  0.00           C  
ATOM   3213  C   CNT A 208     -23.958 -10.756 -42.120  3.00  0.00           C  
ATOM   3214  C   CNT A 208     -23.053 -11.668 -41.600  6.00  0.00           C  
ATOM   3215  C   CNT A 208     -22.986 -10.971 -44.300  2.00  0.00           C  
ATOM   3216  C   CNT A 208     -22.021 -11.810 -43.740  8.00  0.00           C  
ATOM   3217  C   CNT A 208     -22.048 -12.179 -42.410  2.00  0.00           C  
ATOM   3218  C   CNT A 208     -21.021 -13.005 -41.850  5.00  0.00           C  
ATOM   3219  C   CNT A 208     -20.891 -12.095 -44.520  1.00  0.00           C  
ATOM   3220  C   CNT A 208     -19.745 -12.473 -43.850  2.00  0.00           C  
ATOM   3221  C   CNT A 208     -19.788 -12.833 -42.480  1.00  0.00           C  
ATOM   3222  C   CNT A 208     -18.614 -13.043 -41.770  4.00  0.00           C  
ATOM   3223  C   CNT A 208     -18.493 -12.284 -44.470  4.00  0.00           C  
ATOM   3224  C   CNT A 208     -17.343 -12.323 -43.660  1.00  0.00           C  
ATOM   3225  C   CNT A 208     -17.418 -12.743 -42.380  0.00  0.00           C  
ATOM   3226  C   CNT A 208     -16.233 -12.742 -41.600  2.00  0.00           C  
ATOM   3227  C   CNT A 208     -16.130 -11.887 -44.240  5.00  0.00           C  
ATOM   3228  C   CNT A 208     -15.069 -11.574 -43.370  3.00  0.00           C  
ATOM   3229  C   CNT A 208     -15.207 -11.903 -42.030  6.00  0.00           C  
ATOM   3230  C   CNT A 208     -14.126 -11.639 -41.180  7.00  0.00           C  
ATOM   3231  C   CNT A 208     -14.107 -10.634 -43.770  4.00  0.00           C  
ATOM   3232  C   CNT A 208     -13.250 -10.084 -42.830  5.00  0.00           C  
ATOM   3233  C   CNT A 208     -13.289 -10.538 -41.520  2.00  0.00           C  
ATOM   3234  C   CNT A 208     -12.572  -9.894 -40.510  7.00  0.00           C  
ATOM   3235  C   CNT A 208     -12.384  -9.087 -43.150  2.00  0.00           C  
ATOM   3236  C   CNT A 208     -11.780  -8.328 -42.130  6.00  0.00           C  
ATOM   3237  C   CNT A 208     -11.854  -8.718 -40.800  3.00  0.00           C  
ATOM   3238  C   CNT A 208     -11.542  -7.879 -39.720  4.00  0.00           C  
ATOM   3239  C   CNT A 208     -11.326  -7.008 -42.420  7.00  0.00           C  
ATOM   3240  C   CNT A 208     -11.032  -6.120 -41.350  4.00  0.00           C  
ATOM   3241  C   CNT A 208     -11.208  -6.573 -40.010  0.00  0.00           C  
ATOM   3242  C   CNT A 208     -11.163  -5.597 -38.960  9.00  0.00           C  
ATOM   3243  C   CNT A 208     -10.898  -4.721 -41.610  5.00  0.00           C  
ATOM   3244  C   CNT A 208     -11.050  -3.785 -40.550  6.00  0.00           C  
ATOM   3245  C   CNT A 208     -11.260  -4.222 -39.220  8.00  0.00           C  
ATOM   3246  C   CNT A 208     -11.491  -3.349 -38.180  1.00  0.00           C  
ATOM   3247  C   CNT A 208     -11.273  -2.391 -40.820  2.00  0.00           C  
ATOM   3248  C   CNT A 208     -11.777  -1.499 -39.830  9.00  0.00           C  
ATOM   3249  C   CNT A 208     -11.840  -2.022 -38.520  8.00  0.00           C  
ATOM   3250  C   CNT A 208     -12.519  -1.279 -37.570  2.00  0.00           C  
ATOM   3251  C   CNT A 208     -12.496  -0.405 -40.270  1.00  0.00           C  
ATOM   3252  C   CNT A 208     -13.528   0.058 -39.420  3.00  0.00           C  
ATOM   3253  C   CNT A 208     -13.488  -0.324 -38.040  0.00  0.00           C  
ATOM   3254  C   CNT A 208     -14.476   0.255 -37.160  7.00  0.00           C  
ATOM   3255  C   CNT A 208     -14.460  -0.097 -35.830  3.00  0.00           C  
ATOM   3256  C   CNT A 208     -15.562   0.299 -35.010  6.00  0.00           C  
ATOM   3257  C   CNT A 208     -15.622  -0.064 -33.680  7.00  0.00           C  
ATOM   3258  C   CNT A 208     -16.860   0.079 -33.000  3.00  0.00           C  
ATOM   3259  C   CNT A 208     -16.725   0.818 -35.640  9.00  0.00           C  
ATOM   3260  C   CNT A 208     -17.985   0.766 -35.010  1.00  0.00           C  
ATOM   3261  C   CNT A 208     -18.083   0.318 -33.690  0.00  0.00           C  
ATOM   3262  C   CNT A 208     -19.336   0.113 -33.110  2.00  0.00           C  
ATOM   3263  C   CNT A 208     -19.195   0.986 -35.710  6.00  0.00           C  
ATOM   3264  C   CNT A 208     -20.412   0.621 -35.200  5.00  0.00           C  
ATOM   3265  C   CNT A 208     -20.455   0.144 -33.900  0.00  0.00           C  
ATOM   3266  C   CNT A 208     -21.685  -0.393 -33.440  3.00  0.00           C  
ATOM   3267  C   CNT A 208     -21.563   0.562 -36.040  5.00  0.00           C  
ATOM   3268  C   CNT A 208     -22.669  -0.282 -35.670  5.00  0.00           C  
ATOM   3269  C   CNT A 208     -22.707  -0.787 -34.340  9.00  0.00           C  
ATOM   3270  C   CNT A 208     -23.720  -1.656 -33.920  7.00  0.00           C  
ATOM   3271  C   CNT A 208     -23.628  -0.607 -36.570  7.00  0.00           C  
ATOM   3272  C   CNT A 208     -24.551  -1.616 -36.240  9.00  0.00           C  
ATOM   3273  C   CNT A 208     -24.659  -2.052 -34.880  0.00  0.00           C  
ATOM   3274  C   CNT A 208     -25.546  -3.111 -34.560  9.00  0.00           C  
ATOM   3275  C   CNT A 208     -25.359  -2.287 -37.200  5.00  0.00           C  
ATOM   3276  C   CNT A 208     -26.125  -3.406 -36.920  1.00  0.00           C  
ATOM   3277  C   CNT A 208     -26.200  -3.820 -35.560  2.00  0.00           C  
ATOM   3278  C   CNT A 208     -26.716  -5.079 -35.210  4.00  0.00           C  
ATOM   3279  C   CNT A 208     -26.527  -4.218 -37.950  6.00  0.00           C  
ATOM   3280  C   CNT A 208     -26.860  -5.525 -37.590  5.00  0.00           C  
ATOM   3281  C   CNT A 208     -26.886  -6.009 -36.250  3.00  0.00           C  
ATOM   3282  C   CNT A 208     -26.929  -7.372 -35.990  6.00  0.00           C  
ATOM   3283  C   CNT A 208     -26.917  -6.473 -38.660  4.00  0.00           C  
ATOM   3284  C   CNT A 208     -26.835  -7.834 -38.420  8.00  0.00           C  
ATOM   3285  C   CNT A 208     -26.773  -8.275 -37.060  0.00  0.00           C  
ATOM   3286  C   CNT A 208     -26.352  -9.570 -36.730  8.00  0.00           C  
ATOM   3287  C   CNT A 208     -26.383  -8.682 -39.390  0.00  0.00           C  
ATOM   3288  C   CNT A 208     -25.841  -9.921 -39.090  7.00  0.00           C  
ATOM   3289  C   CNT A 208     -25.852 -10.372 -37.720  6.00  0.00           C  
ATOM   3290  C   CNT A 208     -25.141 -11.446 -37.330  6.00  0.00           C  
ATOM   3291  C   CNT A 208     -25.072 -10.657 -39.940  1.00  0.00           C  
ATOM   3292  C   CNT A 208     -24.283 -11.777 -39.560  5.00  0.00           C  
ATOM   3293  C   CNT A 208     -24.268 -12.130 -38.250  6.00  0.00           C  
ATOM   3294  C   CNT A 208     -23.380 -13.078 -37.750  1.00  0.00           C  
ATOM   3295  C   CNT A 208     -23.216 -12.249 -40.310  3.00  0.00           C  
ATOM   3296  C   CNT A 208     -22.232 -13.125 -39.830  0.00  0.00           C  
ATOM   3297  C   CNT A 208     -22.308 -13.545 -38.530  9.00  0.00           C  
ATOM   3298  C   CNT A 208     -21.253 -14.216 -37.920  8.00  0.00           C  
ATOM   3299  C   CNT A 208     -21.062 -13.399 -40.530  6.00  0.00           C  
ATOM   3300  C   CNT A 208     -19.939 -13.824 -39.910  1.00  0.00           C  
ATOM   3301  C   CNT A 208     -19.999 -14.205 -38.580  2.00  0.00           C  
ATOM   3302  C   CNT A 208     -18.805 -14.589 -37.930  6.00  0.00           C  
ATOM   3303  C   CNT A 208     -18.703 -13.456 -40.470  0.00  0.00           C  
ATOM   3304  C   CNT A 208     -17.504 -13.608 -39.780  5.00  0.00           C  
ATOM   3305  C   CNT A 208     -17.610 -14.208 -38.510  6.00  0.00           C  
ATOM   3306  C   CNT A 208     -16.468 -14.165 -37.750  2.00  0.00           C  
ATOM   3307  C   CNT A 208     -16.294 -13.227 -40.300  9.00  0.00           C  
ATOM   3308  C   CNT A 208     -15.188 -13.039 -39.510  1.00  0.00           C  
ATOM   3309  C   CNT A 208     -15.338 -13.470 -38.180  4.00  0.00           C  
ATOM   3310  C   CNT A 208     -14.422 -12.927 -37.200  7.00  0.00           C  
ATOM   3311  C   CNT A 208     -14.140 -12.163 -39.860  8.00  0.00           C  
ATOM   3312  C   CNT A 208     -13.388 -11.504 -38.890  5.00  0.00           C  
ATOM   3313  C   CNT A 208     -13.608 -11.825 -37.540  3.00  0.00           C  
ATOM   3314  C   CNT A 208     -12.888 -11.225 -36.510  9.00  0.00           C  
ATOM   3315  C   CNT A 208     -12.584 -10.427 -39.190  6.00  0.00           C  
ATOM   3316  C   CNT A 208     -12.014  -9.674 -38.150  8.00  0.00           C  
ATOM   3317  C   CNT A 208     -12.147 -10.079 -36.820  9.00  0.00           C  
ATOM   3318  C   CNT A 208     -11.717  -9.245 -35.760  2.00  0.00           C  
ATOM   3319  C   CNT A 208     -11.643  -8.322 -38.370  6.00  0.00           C  
ATOM   3320  C   CNT A 208     -11.437  -7.396 -37.370  1.00  0.00           C  
ATOM   3321  C   CNT A 208     -11.528  -7.862 -36.050  2.00  0.00           C  
ATOM   3322  C   CNT A 208     -11.590  -6.983 -35.000  1.00  0.00           C  
ATOM   3323  C   CNT A 208     -11.214  -5.995 -37.610  1.00  0.00           C  
ATOM   3324  C   CNT A 208     -11.339  -5.116 -36.560  5.00  0.00           C  
ATOM   3325  C   CNT A 208     -11.576  -5.584 -35.240  0.00  0.00           C  
ATOM   3326  C   CNT A 208     -11.883  -4.672 -34.170  1.00  0.00           C  
ATOM   3327  C   CNT A 208     -11.653  -3.741 -36.830  9.00  0.00           C  
ATOM   3328  C   CNT A 208     -12.135  -2.966 -35.850  0.00  0.00           C  
ATOM   3329  C   CNT A 208     -12.268  -3.357 -34.520  5.00  0.00           C  
ATOM   3330  C   CNT A 208     -12.869  -2.547 -33.530  6.00  0.00           C  
ATOM   3331  C   CNT A 208     -12.600  -1.708 -36.210  1.00  0.00           C  
ATOM   3332  C   CNT A 208     -13.462  -0.979 -35.320  2.00  0.00           C  
ATOM   3333  C   CNT A 208     -13.627  -1.461 -33.970  8.00  0.00           C  
ATOM   3334  C   CNT A 208     -14.589  -0.851 -33.110  6.00  0.00           C  
ATOM   3335  C   CNT A 208     -14.702  -1.392 -31.820  3.00  0.00           C  
ATOM   3336  C   CNT A 208     -15.881  -1.149 -31.080  9.00  0.00           C  
ATOM   3337  C   CNT A 208     -15.961  -1.681 -29.760  4.00  0.00           C  
ATOM   3338  C   CNT A 208     -17.215  -1.563 -29.100  0.00  0.00           C  
ATOM   3339  C   CNT A 208     -16.964  -0.431 -31.610  0.00  0.00           C  
ATOM   3340  C   CNT A 208     -18.233  -0.587 -31.060  6.00  0.00           C  
ATOM   3341  C   CNT A 208     -18.349  -1.150 -29.790  9.00  0.00           C  
ATOM   3342  C   CNT A 208     -19.564  -1.329 -29.190  1.00  0.00           C  
ATOM   3343  C   CNT A 208     -19.424  -0.376 -31.790  7.00  0.00           C  
ATOM   3344  C   CNT A 208     -20.644  -0.815 -31.290  6.00  0.00           C  
ATOM   3345  C   CNT A 208     -20.734  -1.209 -29.940  7.00  0.00           C  
ATOM   3346  C   CNT A 208     -21.861  -1.906 -29.540  0.00  0.00           C  
ATOM   3347  C   CNT A 208     -21.745  -0.881 -32.170  8.00  0.00           C  
ATOM   3348  C   CNT A 208     -22.900  -1.540 -31.660  3.00  0.00           C  
ATOM   3349  C   CNT A 208     -22.853  -2.190 -30.430  4.00  0.00           C  
ATOM   3350  C   CNT A 208     -23.926  -3.011 -30.020  3.00  0.00           C  
ATOM   3351  C   CNT A 208     -23.823  -2.019 -32.580  6.00  0.00           C  
ATOM   3352  C   CNT A 208     -24.854  -2.949 -32.230  8.00  0.00           C  
ATOM   3353  C   CNT A 208     -24.871  -3.445 -30.920  5.00  0.00           C  
ATOM   3354  C   CNT A 208     -25.843  -4.332 -30.610  7.00  0.00           C  
ATOM   3355  C   CNT A 208     -25.652  -3.546 -33.250  4.00  0.00           C  
ATOM   3356  C   CNT A 208     -26.312  -4.703 -32.930  5.00  0.00           C  
ATOM   3357  C   CNT A 208     -26.411  -5.091 -31.630  0.00  0.00           C  
ATOM   3358  C   CNT A 208     -27.009  -6.337 -31.290  5.00  0.00           C  
ATOM   3359  C   CNT A 208     -26.800  -5.538 -33.910  1.00  0.00           C  
ATOM   3360  C   CNT A 208     -27.192  -6.872 -33.630  4.00  0.00           C  
ATOM   3361  C   CNT A 208     -27.275  -7.243 -32.310  5.00  0.00           C  
ATOM   3362  C   CNT A 208     -27.372  -8.628 -32.050  1.00  0.00           C  
ATOM   3363  C   CNT A 208     -27.132  -7.787 -34.680  6.00  0.00           C  
ATOM   3364  C   CNT A 208     -26.954  -9.114 -34.380  0.00  0.00           C  
ATOM   3365  C   CNT A 208     -27.058  -9.554 -33.080  1.00  0.00           C  
ATOM   3366  C   CNT A 208     -26.678 -10.861 -32.760  5.00  0.00           C  
ATOM   3367  C   CNT A 208     -26.605  -9.986 -35.420  6.00  0.00           C  
ATOM   3368  C   CNT A 208     -26.064 -11.259 -35.090  0.00  0.00           C  
ATOM   3369  C   CNT A 208     -26.012 -11.616 -33.740  6.00  0.00           C  
ATOM   3370  C   CNT A 208     -25.301 -12.754 -33.380  1.00  0.00           C  
ATOM   3371  C   CNT A 208     -25.190 -11.878 -35.980  6.00  0.00           C  
ATOM   3372  C   CNT A 208     -24.408 -13.008 -35.590  7.00  0.00           C  
ATOM   3373  C   CNT A 208     -24.546 -13.427 -34.280  0.00  0.00           C  
ATOM   3374  C   CNT A 208     -23.680 -14.436 -33.850  9.00  0.00           C  
ATOM   3375  C   CNT A 208     -23.404 -13.486 -36.420  1.00  0.00           C  
ATOM   3376  C   CNT A 208     -22.491 -14.395 -35.940  2.00  0.00           C  
ATOM   3377  C   CNT A 208     -22.644 -14.889 -34.620  5.00  0.00           C  
ATOM   3378  C   CNT A 208     -21.532 -15.484 -34.060  2.00  0.00           C  
ATOM   3379  C   CNT A 208     -21.281 -14.580 -36.600  0.00  0.00           C  
ATOM   3380  C   CNT A 208     -20.101 -15.070 -35.960  7.00  0.00           C  
ATOM   3381  C   CNT A 208     -20.268 -15.460 -34.630  3.00  0.00           C  
ATOM   3382  C   CNT A 208     -19.070 -15.640 -33.950  0.00  0.00           C  
ATOM   3383  C   CNT A 208     -18.896 -15.083 -36.630  3.00  0.00           C  
ATOM   3384  C   CNT A 208     -17.732 -15.119 -35.910  2.00  0.00           C  
ATOM   3385  C   CNT A 208     -17.798 -15.453 -34.540  1.00  0.00           C  
ATOM   3386  C   CNT A 208     -16.732 -15.415 -33.680  3.00  0.00           C  
ATOM   3387  C   CNT A 208     -16.558 -14.523 -36.400  5.00  0.00           C  
ATOM   3388  C   CNT A 208     -15.584 -14.200 -35.430  8.00  0.00           C  
ATOM   3389  C   CNT A 208     -15.612 -14.670 -34.090  0.00  0.00           C  
ATOM   3390  C   CNT A 208     -14.708 -14.165 -33.130  1.00  0.00           C  
ATOM   3391  C   CNT A 208     -14.632 -13.192 -35.830  2.00  0.00           C  
ATOM   3392  C   CNT A 208     -13.713 -12.728 -34.860  7.00  0.00           C  
ATOM   3393  C   CNT A 208     -13.792 -13.175 -33.550  1.00  0.00           C  
ATOM   3394  C   CNT A 208     -12.980 -12.603 -32.550  3.00  0.00           C  
ATOM   3395  C   CNT A 208     -12.952 -11.656 -35.190  4.00  0.00           C  
ATOM   3396  C   CNT A 208     -12.325 -10.942 -34.150  2.00  0.00           C  
ATOM   3397  C   CNT A 208     -12.306 -11.465 -32.850  0.00  0.00           C  
ATOM   3398  C   CNT A 208     -11.914 -10.607 -31.840  4.00  0.00           C  
ATOM   3399  C   CNT A 208     -11.745  -9.737 -34.430  6.00  0.00           C  
ATOM   3400  C   CNT A 208     -11.565  -8.844 -33.450  5.00  0.00           C  
ATOM   3401  C   CNT A 208     -11.719  -9.233 -32.110  7.00  0.00           C  
ATOM   3402  C   CNT A 208     -11.685  -8.333 -31.040  1.00  0.00           C  
ATOM   3403  C   CNT A 208     -11.618  -7.474 -33.650  4.00  0.00           C  
ATOM   3404  C   CNT A 208     -11.607  -6.528 -32.630  1.00  0.00           C  
ATOM   3405  C   CNT A 208     -11.604  -6.948 -31.270  6.00  0.00           C  
ATOM   3406  C   CNT A 208     -11.930  -6.014 -30.250  0.00  0.00           C  
ATOM   3407  C   CNT A 208     -11.841  -5.139 -32.880  0.00  0.00           C  
ATOM   3408  C   CNT A 208     -12.301  -4.260 -31.900  7.00  0.00           C  
ATOM   3409  C   CNT A 208     -12.361  -4.731 -30.570  4.00  0.00           C  
ATOM   3410  C   CNT A 208     -13.186  -4.065 -29.630  3.00  0.00           C  
ATOM   3411  C   CNT A 208     -12.911  -3.029 -32.220  0.00  0.00           C  
ATOM   3412  C   CNT A 208     -13.799  -2.383 -31.330  2.00  0.00           C  
ATOM   3413  C   CNT A 208     -13.875  -2.901 -30.050  6.00  0.00           C  
ATOM   3414  C   CNT A 208     -14.957  -2.462 -29.240  7.00  0.00           C  
ATOM   3415  C   CNT A 208     -15.106  -3.028 -27.910  3.00  0.00           C  
ATOM   3416  C   CNT A 208     -16.263  -2.726 -27.180  9.00  0.00           C  
ATOM   3417  C   CNT A 208     -16.363  -3.177 -25.840  6.00  0.00           C  
ATOM   3418  C   CNT A 208     -17.554  -3.011 -25.190  5.00  0.00           C  
ATOM   3419  C   CNT A 208     -17.333  -2.038 -27.800  1.00  0.00           C  
ATOM   3420  C   CNT A 208     -18.567  -2.024 -27.140  4.00  0.00           C  
ATOM   3421  C   CNT A 208     -18.678  -2.566 -25.900  2.00  0.00           C  
ATOM   3422  C   CNT A 208     -19.948  -2.682 -25.250  4.00  0.00           C  
ATOM   3423  C   CNT A 208     -19.674  -1.757 -27.880  8.00  0.00           C  
ATOM   3424  C   CNT A 208     -20.934  -2.108 -27.310  5.00  0.00           C  
ATOM   3425  C   CNT A 208     -21.072  -2.558 -26.060  1.00  0.00           C  
ATOM   3426  C   CNT A 208     -22.307  -2.878 -25.500  4.00  0.00           C  
ATOM   3427  C   CNT A 208     -22.021  -2.274 -28.180  1.00  0.00           C  
ATOM   3428  C   CNT A 208     -23.235  -2.812 -27.750  6.00  0.00           C  
ATOM   3429  C   CNT A 208     -23.321  -3.217 -26.400  3.00  0.00           C  
ATOM   3430  C   CNT A 208     -24.357  -4.013 -25.990  2.00  0.00           C  
ATOM   3431  C   CNT A 208     -24.076  -3.405 -28.700  6.00  0.00           C  
ATOM   3432  C   CNT A 208     -25.231  -4.010 -28.220  3.00  0.00           C  
ATOM   3433  C   CNT A 208     -25.198  -4.619 -26.980  0.00  0.00           C  
ATOM   3434  C   CNT A 208     -26.015  -5.680 -26.630  3.00  0.00           C  
ATOM   3435  C   CNT A 208     -26.030  -4.655 -29.250  3.00  0.00           C  
ATOM   3436  C   CNT A 208     -26.574  -6.010 -28.920  9.00  0.00           C  
ATOM   3437  C   CNT A 208     -26.683  -6.411 -27.640  4.00  0.00           C  
ATOM   3438  C   CNT A 208     -27.112  -7.714 -27.340  8.00  0.00           C  
ATOM   3439  C   CNT A 208     -27.016  -6.793 -29.970  3.00  0.00           C  
ATOM   3440  C   CNT A 208     -27.404  -8.139 -29.700  7.00  0.00           C  
ATOM   3441  C   CNT A 208     -27.422  -8.626 -28.370  4.00  0.00           C  
ATOM   3442  C   CNT A 208     -27.599  -9.994 -28.090  3.00  0.00           C  
ATOM   3443  C   CNT A 208     -27.516  -9.081 -30.740  9.00  0.00           C  
ATOM   3444  C   CNT A 208     -27.264 -10.455 -30.430  6.00  0.00           C  
ATOM   3445  C   CNT A 208     -27.444 -10.932 -29.130  4.00  0.00           C  
ATOM   3446  C   CNT A 208     -27.231 -12.266 -28.830  0.00  0.00           C  
ATOM   3447  C   CNT A 208     -26.764 -11.263 -31.430  7.00  0.00           C  
ATOM   3448  C   CNT A 208     -26.236 -12.529 -31.120  4.00  0.00           C  
ATOM   3449  C   CNT A 208     -26.516 -13.071 -29.850  9.00  0.00           C  
ATOM   3450  C   CNT A 208     -25.794 -14.201 -29.420  7.00  0.00           C  
ATOM   3451  C   CNT A 208     -25.546 -13.284 -32.090  6.00  0.00           C  
ATOM   3452  C   CNT A 208     -24.724 -14.362 -31.650  3.00  0.00           C  
ATOM   3453  C   CNT A 208     -24.767 -14.694 -30.260  4.00  0.00           C  
ATOM   3454  C   CNT A 208     -23.830 -15.586 -29.750  7.00  0.00           C  
ATOM   3455  C   CNT A 208     -23.748 -14.955 -32.500  6.00  0.00           C  
ATOM   3456  C   CNT A 208     -22.781 -15.776 -31.980  6.00  0.00           C  
ATOM   3457  C   CNT A 208     -22.862 -16.131 -30.600  1.00  0.00           C  
ATOM   3458  C   CNT A 208     -21.769 -16.787 -29.960  0.00  0.00           C  
ATOM   3459  C   CNT A 208     -21.590 -15.906 -32.730  1.00  0.00           C  
ATOM   3460  C   CNT A 208     -20.470 -16.311 -32.040  1.00  0.00           C  
ATOM   3461  C   CNT A 208     -20.575 -16.832 -30.710  3.00  0.00           C  
ATOM   3462  C   CNT A 208     -19.388 -17.180 -29.990  2.00  0.00           C  
ATOM   3463  C   CNT A 208     -19.191 -16.224 -32.660  1.00  0.00           C  
ATOM   3464  C   CNT A 208     -18.042 -16.344 -31.860  2.00  0.00           C  
ATOM   3465  C   CNT A 208     -18.089 -16.876 -30.540  7.00  0.00           C  
ATOM   3466  C   CNT A 208     -17.002 -16.756 -29.720  9.00  0.00           C  
ATOM   3467  C   CNT A 208     -16.831 -15.786 -32.310  8.00  0.00           C  
ATOM   3468  C   CNT A 208     -15.849 -15.421 -31.380  1.00  0.00           C  
ATOM   3469  C   CNT A 208     -15.870 -15.985 -30.120  9.00  0.00           C  
ATOM   3470  C   CNT A 208     -14.855 -15.696 -29.220  2.00  0.00           C  
ATOM   3471  C   CNT A 208     -14.769 -14.678 -31.830  9.00  0.00           C  
ATOM   3472  C   CNT A 208     -13.880 -14.197 -30.900  2.00  0.00           C  
ATOM   3473  C   CNT A 208     -13.969 -14.694 -29.600  8.00  0.00           C  
ATOM   3474  C   CNT A 208     -13.219 -14.055 -28.540  4.00  0.00           C  
ATOM   3475  C   CNT A 208     -13.094 -13.094 -31.210  7.00  0.00           C  
ATOM   3476  C   CNT A 208     -12.515 -12.417 -30.180  1.00  0.00           C  
ATOM   3477  C   CNT A 208     -12.637 -12.804 -28.850  7.00  0.00           C  
ATOM   3478  C   CNT A 208     -12.120 -11.991 -27.830  3.00  0.00           C  
ATOM   3479  C   CNT A 208     -12.039 -11.079 -30.490  1.00  0.00           C  
ATOM   3480  C   CNT A 208     -11.833 -10.155 -29.460  8.00  0.00           C  
ATOM   3481  C   CNT A 208     -11.914 -10.629 -28.140  7.00  0.00           C  
ATOM   3482  C   CNT A 208     -12.020  -9.639 -27.100  9.00  0.00           C  
ATOM   3483  C   CNT A 208     -11.657  -8.807 -29.700  4.00  0.00           C  
ATOM   3484  C   CNT A 208     -11.757  -7.843 -28.630  4.00  0.00           C  
ATOM   3485  C   CNT A 208     -11.964  -8.254 -27.320  1.00  0.00           C  
ATOM   3486  C   CNT A 208     -12.246  -7.366 -26.260  0.00  0.00           C  
ATOM   3487  C   CNT A 208     -11.969  -6.445 -28.920  0.00  0.00           C  
ATOM   3488  C   CNT A 208     -12.529  -5.600 -27.900  3.00  0.00           C  
ATOM   3489  C   CNT A 208     -12.758  -6.080 -26.590  9.00  0.00           C  
ATOM   3490  C   CNT A 208     -13.396  -5.335 -25.650  1.00  0.00           C  
ATOM   3491  C   CNT A 208     -13.231  -4.470 -28.310  4.00  0.00           C  
ATOM   3492  C   CNT A 208     -14.157  -3.918 -27.410  8.00  0.00           C  
ATOM   3493  C   CNT A 208     -14.215  -4.264 -26.090  0.00  0.00           C  
ATOM   3494  C   CNT A 208     -15.264  -3.843 -25.290  6.00  0.00           C  
ATOM   3495  C   CNT A 208     -15.400  -4.334 -23.980  4.00  0.00           C  
ATOM   3496  C   CNT A 208     -16.535  -4.042 -23.260  5.00  0.00           C  
ATOM   3497  C   CNT A 208     -16.604  -4.438 -21.910  4.00  0.00           C  
ATOM   3498  C   CNT A 208     -17.804  -4.130 -21.220  4.00  0.00           C  
ATOM   3499  C   CNT A 208     -17.651  -3.366 -23.800  7.00  0.00           C  
ATOM   3500  C   CNT A 208     -18.901  -3.338 -23.200  8.00  0.00           C  
ATOM   3501  C   CNT A 208     -18.987  -3.724 -21.850  9.00  0.00           C  
ATOM   3502  C   CNT A 208     -20.266  -3.865 -21.260  7.00  0.00           C  
ATOM   3503  C   CNT A 208     -20.083  -3.110 -23.900  4.00  0.00           C  
ATOM   3504  C   CNT A 208     -21.304  -3.277 -23.310  6.00  0.00           C  
ATOM   3505  C   CNT A 208     -21.434  -3.754 -22.000  0.00  0.00           C  
ATOM   3506  C   CNT A 208     -22.622  -4.235 -21.530  9.00  0.00           C  
ATOM   3507  C   CNT A 208     -22.469  -3.262 -24.180  2.00  0.00           C  
ATOM   3508  C   CNT A 208     -23.603  -3.944 -23.700  2.00  0.00           C  
ATOM   3509  C   CNT A 208     -23.681  -4.488 -22.400  2.00  0.00           C  
ATOM   3510  C   CNT A 208     -24.618  -5.451 -22.060  8.00  0.00           C  
ATOM   3511  C   CNT A 208     -24.517  -4.444 -24.670  2.00  0.00           C  
ATOM   3512  C   CNT A 208     -25.412  -5.434 -24.300  0.00  0.00           C  
ATOM   3513  C   CNT A 208     -25.509  -5.914 -23.000  9.00  0.00           C  
ATOM   3514  C   CNT A 208     -26.327  -7.047 -22.640  2.00  0.00           C  
ATOM   3515  C   CNT A 208     -26.056  -6.174 -25.340  4.00  0.00           C  
ATOM   3516  C   CNT A 208     -26.603  -7.426 -25.010  9.00  0.00           C  
ATOM   3517  C   CNT A 208     -26.743  -7.838 -23.700  0.00  0.00           C  
ATOM   3518  C   CNT A 208     -27.254  -9.072 -23.400  7.00  0.00           C  
ATOM   3519  C   CNT A 208     -27.116  -8.191 -26.020  7.00  0.00           C  
ATOM   3520  C   CNT A 208     -27.406  -9.533 -25.710  8.00  0.00           C  
ATOM   3521  C   CNT A 208     -27.566  -9.963 -24.370  5.00  0.00           C  
ATOM   3522  C   CNT A 208     -27.743 -11.313 -24.130  3.00  0.00           C  
ATOM   3523  C   CNT A 208     -27.530 -10.437 -26.740  7.00  0.00           C  
ATOM   3524  C   CNT A 208     -27.584 -11.851 -26.470  5.00  0.00           C  
ATOM   3525  C   CNT A 208     -27.710 -12.294 -25.160  6.00  0.00           C  
ATOM   3526  C   CNT A 208     -27.408 -13.611 -24.830  1.00  0.00           C  
ATOM   3527  C   CNT A 208     -27.262 -12.721 -27.540  5.00  0.00           C  
ATOM   3528  C   CNT A 208     -26.742 -13.983 -27.170  6.00  0.00           C  
ATOM   3529  C   CNT A 208     -26.774 -14.426 -25.840  3.00  0.00           C  
ATOM   3530  C   CNT A 208     -26.193 -15.651 -25.490  7.00  0.00           C  
ATOM   3531  C   CNT A 208     -25.905 -14.679 -28.100  3.00  0.00           C  
ATOM   3532  C   CNT A 208     -25.063 -15.661 -27.630  9.00  0.00           C  
ATOM   3533  C   CNT A 208     -25.136 -16.090 -26.320  2.00  0.00           C  
ATOM   3534  C   CNT A 208     -24.259 -17.049 -25.840  2.00  0.00           C  
ATOM   3535  C   CNT A 208     -23.996 -16.119 -28.420  1.00  0.00           C  
ATOM   3536  C   CNT A 208     -23.041 -16.953 -27.930  8.00  0.00           C  
ATOM   3537  C   CNT A 208     -23.171 -17.420 -26.620  4.00  0.00           C  
ATOM   3538  C   CNT A 208     -21.986 -17.929 -26.010  2.00  0.00           C  
ATOM   3539  C   CNT A 208     -21.847 -17.142 -28.630  1.00  0.00           C  
ATOM   3540  C   CNT A 208     -20.673 -17.545 -27.960  1.00  0.00           C  
ATOM   3541  C   CNT A 208     -20.742 -17.924 -26.600  4.00  0.00           C  
ATOM   3542  C   CNT A 208     -19.581 -18.199 -25.890  4.00  0.00           C  
ATOM   3543  C   CNT A 208     -19.404 -17.406 -28.590  6.00  0.00           C  
ATOM   3544  C   CNT A 208     -18.249 -17.533 -27.800  8.00  0.00           C  
ATOM   3545  C   CNT A 208     -18.319 -17.929 -26.500  7.00  0.00           C  
ATOM   3546  C   CNT A 208     -17.150 -18.120 -25.720  2.00  0.00           C  
ATOM   3547  C   CNT A 208     -16.982 -17.164 -28.370  7.00  0.00           C  
ATOM   3548  C   CNT A 208     -15.954 -17.018 -27.490  7.00  0.00           C  
ATOM   3549  C   CNT A 208     -16.013 -17.484 -26.150  9.00  0.00           C  
ATOM   3550  C   CNT A 208     -14.995 -17.127 -25.280  5.00  0.00           C  
ATOM   3551  C   CNT A 208     -14.904 -16.181 -27.890  3.00  0.00           C  
ATOM   3552  C   CNT A 208     -14.044 -15.575 -26.890  4.00  0.00           C  
ATOM   3553  C   CNT A 208     -14.101 -16.054 -25.590  6.00  0.00           C  
ATOM   3554  C   CNT A 208     -13.534 -15.346 -24.550  2.00  0.00           C  
ATOM   3555  C   CNT A 208     -13.259 -14.489 -27.240  8.00  0.00           C  
ATOM   3556  C   CNT A 208     -12.650 -13.704 -26.240  4.00  0.00           C  
ATOM   3557  C   CNT A 208     -12.795 -14.165 -24.880  8.00  0.00           C  
ATOM   3558  C   CNT A 208     -12.387 -13.327 -23.870  4.00  0.00           C  
ATOM   3559  C   CNT A 208     -12.268 -12.413 -26.480  8.00  0.00           C  
ATOM   3560  C   CNT A 208     -12.194 -11.467 -25.450  4.00  0.00           C  
ATOM   3561  C   CNT A 208     -12.278 -11.951 -24.100  2.00  0.00           C  
ATOM   3562  C   CNT A 208     -12.340 -11.016 -23.060  0.00  0.00           C  
ATOM   3563  C   CNT A 208     -12.152 -10.106 -25.760  1.00  0.00           C  
ATOM   3564  C   CNT A 208     -12.353  -9.201 -24.710  2.00  0.00           C  
ATOM   3565  C   CNT A 208     -12.451  -9.659 -23.380  2.00  0.00           C  
ATOM   3566  C   CNT A 208     -12.653  -8.773 -22.350  5.00  0.00           C  
ATOM   3567  C   CNT A 208     -12.446  -7.872 -24.960  0.00  0.00           C  
ATOM   3568  C   CNT A 208     -12.983  -7.042 -23.960  5.00  0.00           C  
ATOM   3569  C   CNT A 208     -13.021  -7.458 -22.640  6.00  0.00           C  
ATOM   3570  C   CNT A 208     -13.793  -6.707 -21.740  4.00  0.00           C  
ATOM   3571  C   CNT A 208     -13.607  -5.871 -24.380  0.00  0.00           C  
ATOM   3572  C   CNT A 208     -14.386  -5.188 -23.430  5.00  0.00           C  
ATOM   3573  C   CNT A 208     -14.631  -5.706 -22.160  7.00  0.00           C  
ATOM   3574  C   CNT A 208     -15.614  -5.203 -21.310  9.00  0.00           C  
ATOM   3575  C   CNT A 208     -15.707  -5.581 -19.990  2.00  0.00           C  
ATOM   3576  C   CNT A 208     -16.808  -5.223 -19.250  8.00  0.00           C  
ATOM   3577  C   CNT A 208     -16.862  -5.597 -17.920  4.00  0.00           C  
ATOM   3578  C   CNT A 208     -18.059  -5.394 -17.190  7.00  0.00           C  
ATOM   3579  C   CNT A 208     -17.877  -4.634 -19.870  6.00  0.00           C  
ATOM   3580  C   CNT A 208     -19.094  -4.511 -19.220  7.00  0.00           C  
ATOM   3581  C   CNT A 208     -19.190  -4.884 -17.860  5.00  0.00           C  
ATOM   3582  C   CNT A 208     -20.450  -5.032 -17.240  2.00  0.00           C  
ATOM   3583  C   CNT A 208     -20.289  -4.318 -19.970  8.00  0.00           C  
ATOM   3584  C   CNT A 208     -21.547  -4.672 -19.410  1.00  0.00           C  
ATOM   3585  C   CNT A 208     -21.571  -5.125 -18.070  1.00  0.00           C  
ATOM   3586  C   CNT A 208     -22.835  -5.589 -17.550  8.00  0.00           C  
ATOM   3587  C   CNT A 208     -22.683  -4.696 -20.220  0.00  0.00           C  
ATOM   3588  C   CNT A 208     -23.719  -5.525 -19.800  7.00  0.00           C  
ATOM   3589  C   CNT A 208     -23.838  -5.992 -18.480  0.00  0.00           C  
ATOM   3590  C   CNT A 208     -24.816  -6.920 -18.100  0.00  0.00           C  
ATOM   3591  C   CNT A 208     -24.691  -5.915 -20.730  2.00  0.00           C  
ATOM   3592  C   CNT A 208     -25.690  -6.823 -20.380  4.00  0.00           C  
ATOM   3593  C   CNT A 208     -25.801  -7.281 -19.050  5.00  0.00           C  
ATOM   3594  C   CNT A 208     -26.595  -8.353 -18.760  2.00  0.00           C  
ATOM   3595  C   CNT A 208     -26.397  -7.479 -21.340  3.00  0.00           C  
ATOM   3596  C   CNT A 208     -27.132  -8.668 -21.070  4.00  0.00           C  
ATOM   3597  C   CNT A 208     -27.213  -9.122 -19.730  6.00  0.00           C  
ATOM   3598  C   CNT A 208     -27.599 -10.398 -19.410  9.00  0.00           C  
ATOM   3599  C   CNT A 208     -27.325  -9.563 -22.070  8.00  0.00           C  
ATOM   3600  C   CNT A 208     -27.633 -10.873 -21.790  9.00  0.00           C  
ATOM   3601  C   CNT A 208     -27.855 -11.284 -20.470  8.00  0.00           C  
ATOM   3602  C   CNT A 208     -28.045 -12.651 -20.190  8.00  0.00           C  
ATOM   3603  C   CNT A 208     -27.711 -11.821 -22.830  7.00  0.00           C  
ATOM   3604  C   CNT A 208     -27.666 -13.161 -22.530  7.00  0.00           C  
ATOM   3605  C   CNT A 208     -27.813 -13.612 -21.190  0.00  0.00           C  
ATOM   3606  C   CNT A 208     -27.522 -14.943 -20.920  6.00  0.00           C  
ATOM   3607  C   CNT A 208     -27.322 -14.057 -23.540  1.00  0.00           C  
ATOM   3608  C   CNT A 208     -26.943 -15.367 -23.240  0.00  0.00           C  
ATOM   3609  C   CNT A 208     -27.065 -15.811 -21.900  3.00  0.00           C  
ATOM   3610  C   CNT A 208     -26.379 -16.932 -21.510  4.00  0.00           C  
ATOM   3611  C   CNT A 208     -26.223 -16.100 -24.170  7.00  0.00           C  
ATOM   3612  C   CNT A 208     -25.370 -17.056 -23.700  4.00  0.00           C  
ATOM   3613  C   CNT A 208     -25.416 -17.470 -22.380  9.00  0.00           C  
ATOM   3614  C   CNT A 208     -24.451 -18.243 -21.830  4.00  0.00           C  
ATOM   3615  C   CNT A 208     -24.298 -17.432 -24.490  7.00  0.00           C  
ATOM   3616  C   CNT A 208     -23.155 -17.986 -23.870  6.00  0.00           C  
ATOM   3617  C   CNT A 208     -23.251 -18.400 -22.550  9.00  0.00           C  
ATOM   3618  C   CNT A 208     -22.154 -19.067 -21.950  4.00  0.00           C  
ATOM   3619  C   CNT A 208     -22.032 -18.315 -24.670  6.00  0.00           C  
ATOM   3620  C   CNT A 208     -20.909 -18.813 -23.950  5.00  0.00           C  
ATOM   3621  C   CNT A 208     -20.955 -19.094 -22.610  1.00  0.00           C  
ATOM   3622  C   CNT A 208     -19.782 -19.608 -21.960  3.00  0.00           C  
ATOM   3623  C   CNT A 208     -19.642 -18.750 -24.620  7.00  0.00           C  
ATOM   3624  C   CNT A 208     -18.448 -18.896 -23.910  3.00  0.00           C  
ATOM   3625  C   CNT A 208     -18.564 -19.274 -22.570  8.00  0.00           C  
ATOM   3626  C   CNT A 208     -17.428 -19.297 -21.760  7.00  0.00           C  
ATOM   3627  C   CNT A 208     -17.183 -18.492 -24.390  0.00  0.00           C  
ATOM   3628  C   CNT A 208     -16.088 -18.340 -23.510  0.00  0.00           C  
ATOM   3629  C   CNT A 208     -16.222 -18.678 -22.150  5.00  0.00           C  
ATOM   3630  C   CNT A 208     -15.325 -18.260 -21.240  7.00  0.00           C  
ATOM   3631  C   CNT A 208     -14.974 -17.626 -23.950  6.00  0.00           C  
ATOM   3632  C   CNT A 208     -14.195 -17.004 -22.950  0.00  0.00           C  
ATOM   3633  C   CNT A 208     -14.288 -17.444 -21.630  9.00  0.00           C  
ATOM   3634  C   CNT A 208     -13.636 -16.747 -20.570  0.00  0.00           C  
ATOM   3635  C   CNT A 208     -13.457 -15.841 -23.240  7.00  0.00           C  
ATOM   3636  C   CNT A 208     -12.891 -15.075 -22.210  6.00  0.00           C  
ATOM   3637  C   CNT A 208     -13.005 -15.526 -20.900  7.00  0.00           C  
ATOM   3638  C   CNT A 208     -12.731 -14.623 -19.860  9.00  0.00           C  
ATOM   3639  C   CNT A 208     -12.481 -13.773 -22.500  6.00  0.00           C  
ATOM   3640  C   CNT A 208     -12.367 -12.856 -21.470  2.00  0.00           C  
ATOM   3641  C   CNT A 208     -12.434 -13.300 -20.140  8.00  0.00           C  
ATOM   3642  C   CNT A 208     -12.454 -12.374 -19.080  8.00  0.00           C  
ATOM   3643  C   CNT A 208     -12.409 -11.479 -21.740  7.00  0.00           C  
ATOM   3644  C   CNT A 208     -12.546 -10.566 -20.720  1.00  0.00           C  
ATOM   3645  C   CNT A 208     -12.604 -10.998 -19.360  0.00  0.00           C  
ATOM   3646  C   CNT A 208     -12.879 -10.083 -18.350  8.00  0.00           C  
ATOM   3647  C   CNT A 208     -12.876  -9.216 -21.020  5.00  0.00           C  
ATOM   3648  C   CNT A 208     -13.372  -8.357 -20.000  1.00  0.00           C  
ATOM   3649  C   CNT A 208     -13.372  -8.811 -18.710  9.00  0.00           C  
ATOM   3650  C   CNT A 208     -14.035  -8.021 -17.780  3.00  0.00           C  
ATOM   3651  C   CNT A 208     -13.857  -7.075 -20.390  1.00  0.00           C  
ATOM   3652  C   CNT A 208     -14.736  -6.451 -19.540  6.00  0.00           C  
ATOM   3653  C   CNT A 208     -14.897  -6.963 -18.220  7.00  0.00           C  
ATOM   3654  C   CNT A 208     -15.840  -6.385 -17.360  8.00  0.00           C  
ATOM   3655  C   CNT A 208     -15.959  -6.891 -16.000  1.00  0.00           C  
ATOM   3656  C   CNT A 208     -17.116  -6.605 -15.340  7.00  0.00           C  
ATOM   3657  C   CNT A 208     -17.208  -6.987 -14.010  1.00  0.00           C  
ATOM   3658  C   CNT A 208     -18.391  -6.808 -13.280  5.00  0.00           C  
ATOM   3659  C   CNT A 208     -18.147  -5.883 -15.850  2.00  0.00           C  
ATOM   3660  C   CNT A 208     -19.380  -5.793 -15.180  4.00  0.00           C  
ATOM   3661  C   CNT A 208     -19.545  -6.300 -13.870  5.00  0.00           C  
ATOM   3662  C   CNT A 208     -20.844  -6.649 -13.350  4.00  0.00           C  
ATOM   3663  C   CNT A 208     -20.569  -5.467 -15.930  8.00  0.00           C  
ATOM   3664  C   CNT A 208     -21.813  -5.894 -15.360  6.00  0.00           C  
ATOM   3665  C   CNT A 208     -21.949  -6.416 -14.070  9.00  0.00           C  
ATOM   3666  C   CNT A 208     -23.167  -6.901 -13.550  3.00  0.00           C  
ATOM   3667  C   CNT A 208     -22.947  -6.026 -16.250  2.00  0.00           C  
ATOM   3668  C   CNT A 208     -24.045  -6.771 -15.820  4.00  0.00           C  
ATOM   3669  C   CNT A 208     -24.241  -7.215 -14.520  3.00  0.00           C  
ATOM   3670  C   CNT A 208     -25.235  -8.101 -14.100  0.00  0.00           C  
ATOM   3671  C   CNT A 208     -24.884  -7.315 -16.770  7.00  0.00           C  
ATOM   3672  C   CNT A 208     -25.909  -8.223 -16.430  1.00  0.00           C  
ATOM   3673  C   CNT A 208     -26.097  -8.599 -15.110  2.00  0.00           C  
ATOM   3674  C   CNT A 208     -27.054  -9.551 -14.730  8.00  0.00           C  
ATOM   3675  C   CNT A 208     -26.713  -8.810 -17.410  9.00  0.00           C  
ATOM   3676  C   CNT A 208     -27.311  -9.983 -17.070  6.00  0.00           C  
ATOM   3677  C   CNT A 208     -27.568 -10.374 -15.710  5.00  0.00           C  
ATOM   3678  C   CNT A 208     -28.033 -11.667 -15.480  0.00  0.00           C  
ATOM   3679  C   CNT A 208     -27.596 -10.878 -18.090  1.00  0.00           C  
ATOM   3680  C   CNT A 208     -27.959 -12.228 -17.810  0.00  0.00           C  
ATOM   3681  C   CNT A 208     -28.202 -12.579 -16.510  7.00  0.00           C  
ATOM   3682  C   CNT A 208     -28.277 -13.959 -16.210  6.00  0.00           C  
ATOM   3683  C   CNT A 208     -28.099 -13.108 -18.860  7.00  0.00           C  
ATOM   3684  C   CNT A 208     -27.965 -14.539 -18.590  2.00  0.00           C  
ATOM   3685  C   CNT A 208     -28.108 -14.901 -17.200  6.00  0.00           C  
ATOM   3686  C   CNT A 208     -27.814 -16.249 -16.900  0.00  0.00           C  
ATOM   3687  C   CNT A 208     -27.675 -15.408 -19.650  7.00  0.00           C  
ATOM   3688  C   CNT A 208     -27.194 -16.654 -19.230  5.00  0.00           C  
ATOM   3689  C   CNT A 208     -27.242 -17.024 -17.900  3.00  0.00           C  
ATOM   3690  C   CNT A 208     -26.651 -18.226 -17.550  4.00  0.00           C  
ATOM   3691  C   CNT A 208     -26.470 -17.406 -20.220  0.00  0.00           C  
ATOM   3692  C   CNT A 208     -25.626 -18.427 -19.800  3.00  0.00           C  
ATOM   3693  C   CNT A 208     -25.740 -18.822 -18.420  1.00  0.00           C  
ATOM   3694  C   CNT A 208     -24.747 -19.655 -17.890  3.00  0.00           C  
ATOM   3695  C   CNT A 208     -24.582 -18.805 -20.560  9.00  0.00           C  
ATOM   3696  C   CNT A 208     -23.466 -19.436 -19.940  6.00  0.00           C  
ATOM   3697  C   CNT A 208     -23.583 -19.900 -18.640  9.00  0.00           C  
ATOM   3698  C   CNT A 208     -22.472 -20.551 -18.060  7.00  0.00           C  
ATOM   3699  C   CNT A 208     -22.286 -19.549 -20.670  9.00  0.00           C  
ATOM   3700  C   CNT A 208     -21.198 -20.097 -20.050  7.00  0.00           C  
ATOM   3701  C   CNT A 208     -21.257 -20.586 -18.760  2.00  0.00           C  
ATOM   3702  C   CNT A 208     -20.089 -20.839 -18.030  0.00  0.00           C  
ATOM   3703  C   CNT A 208     -19.910 -19.979 -20.630  7.00  0.00           C  
ATOM   3704  C   CNT A 208     -18.741 -20.199 -19.870  3.00  0.00           C  
ATOM   3705  C   CNT A 208     -18.790 -20.605 -18.580  4.00  0.00           C  
ATOM   3706  C   CNT A 208     -17.696 -20.528 -17.680  8.00  0.00           C  
ATOM   3707  C   CNT A 208     -17.539 -19.725 -20.420  9.00  0.00           C  
ATOM   3708  C   CNT A 208     -16.454 -19.545 -19.570  8.00  0.00           C  
ATOM   3709  C   CNT A 208     -16.468 -20.023 -18.200  4.00  0.00           C  
ATOM   3710  C   CNT A 208     -15.461 -19.592 -17.270  6.00  0.00           C  
ATOM   3711  C   CNT A 208     -15.429 -18.632 -19.920  9.00  0.00           C  
ATOM   3712  C   CNT A 208     -14.582 -18.157 -18.910  3.00  0.00           C  
ATOM   3713  C   CNT A 208     -14.672 -18.503 -17.590  4.00  0.00           C  
ATOM   3714  C   CNT A 208     -13.952 -17.846 -16.610  1.00  0.00           C  
ATOM   3715  C   CNT A 208     -13.734 -17.097 -19.240  9.00  0.00           C  
ATOM   3716  C   CNT A 208     -13.113 -16.331 -18.230  2.00  0.00           C  
ATOM   3717  C   CNT A 208     -13.294 -16.707 -16.890  3.00  0.00           C  
ATOM   3718  C   CNT A 208     -12.727 -15.908 -15.860  2.00  0.00           C  
ATOM   3719  C   CNT A 208     -12.759 -14.989 -18.520  6.00  0.00           C  
ATOM   3720  C   CNT A 208     -12.557 -14.113 -17.460  0.00  0.00           C  
ATOM   3721  C   CNT A 208     -12.458 -14.564 -16.110  2.00  0.00           C  
ATOM   3722  C   CNT A 208     -12.545 -13.624 -15.050  8.00  0.00           C  
ATOM   3723  C   CNT A 208     -12.417 -12.725 -17.720  1.00  0.00           C  
ATOM   3724  C   CNT A 208     -12.750 -11.860 -16.710  9.00  0.00           C  
ATOM   3725  C   CNT A 208     -12.743 -12.241 -15.390  6.00  0.00           C  
ATOM   3726  C   CNT A 208     -13.110 -11.389 -14.330  3.00  0.00           C  
ATOM   3727  C   CNT A 208     -13.064 -10.523 -17.040  1.00  0.00           C  
ATOM   3728  C   CNT A 208     -13.629  -9.694 -16.060  5.00  0.00           C  
ATOM   3729  C   CNT A 208     -13.689 -10.190 -14.760  3.00  0.00           C  
ATOM   3730  C   CNT A 208     -14.351  -9.374 -13.770  9.00  0.00           C  
ATOM   3731  C   CNT A 208     -14.102  -8.440 -16.430  3.00  0.00           C  
ATOM   3732  C   CNT A 208     -15.021  -7.853 -15.560  0.00  0.00           C  
ATOM   3733  C   CNT A 208     -15.078  -8.215 -14.230  7.00  0.00           C  
ATOM   3734  C   CNT A 208     -16.142  -7.720 -13.440  2.00  0.00           C  
ATOM   3735  C   CNT A 208     -16.258  -8.164 -12.100  6.00  0.00           C  
ATOM   3736  C   CNT A 208     -17.362  -7.822 -11.340  0.00  0.00           C  
ATOM   3737  C   CNT A 208     -17.527  -8.232 -10.060  0.00  0.00           C  
ATOM   3738  C   CNT A 208     -18.645  -8.023  -9.310  6.00  0.00           C  
ATOM   3739  C   CNT A 208     -18.486  -7.233 -11.970  5.00  0.00           C  
ATOM   3740  C   CNT A 208     -19.764  -7.220 -11.290  9.00  0.00           C  
ATOM   3741  C   CNT A 208     -19.821  -7.639  -9.970  6.00  0.00           C  
ATOM   3742  C   CNT A 208     -21.084  -7.810  -9.390  6.00  0.00           C  
ATOM   3743  C   CNT A 208     -20.901  -7.137 -12.080  5.00  0.00           C  
ATOM   3744  C   CNT A 208     -22.137  -7.450 -11.500  0.00  0.00           C  
ATOM   3745  C   CNT A 208     -22.260  -7.823 -10.160  6.00  0.00           C  
ATOM   3746  C   CNT A 208     -23.448  -8.240  -9.580  2.00  0.00           C  
ATOM   3747  C   CNT A 208     -23.253  -7.420 -12.300  8.00  0.00           C  
ATOM   3748  C   CNT A 208     -24.471  -8.024 -11.830  4.00  0.00           C  
ATOM   3749  C   CNT A 208     -24.509  -8.414 -10.470  4.00  0.00           C  
ATOM   3750  C   CNT A 208     -25.644  -9.161 -10.110  6.00  0.00           C  
ATOM   3751  C   CNT A 208     -25.397  -8.444 -12.790  5.00  0.00           C  
ATOM   3752  C   CNT A 208     -26.369  -9.368 -12.360  9.00  0.00           C  
ATOM   3753  C   CNT A 208     -26.363  -9.839 -11.050  3.00  0.00           C  
ATOM   3754  C   CNT A 208     -27.114 -10.936 -10.710  4.00  0.00           C  
ATOM   3755  C   CNT A 208     -27.104  -9.999 -13.350  2.00  0.00           C  
ATOM   3756  C   CNT A 208     -27.624 -11.271 -13.040  8.00  0.00           C  
ATOM   3757  C   CNT A 208     -27.673 -11.741 -11.740  1.00  0.00           C  
ATOM   3758  C   CNT A 208     -28.119 -13.012 -11.480  6.00  0.00           C  
ATOM   3759  C   CNT A 208     -28.095 -12.062 -14.120  0.00  0.00           C  
ATOM   3760  C   CNT A 208     -28.288 -13.444 -13.830  9.00  0.00           C  
ATOM   3761  C   CNT A 208     -28.396 -13.873 -12.540  3.00  0.00           C  
ATOM   3762  C   CNT A 208     -28.437 -15.257 -12.220  7.00  0.00           C  
ATOM   3763  C   CNT A 208     -28.369 -14.360 -14.860  4.00  0.00           C  
ATOM   3764  C   CNT A 208     -28.249 -15.735 -14.550  9.00  0.00           C  
ATOM   3765  C   CNT A 208     -28.334 -16.214 -13.200  7.00  0.00           C  
ATOM   3766  C   CNT A 208     -28.171 -17.538 -12.940  6.00  0.00           C  
ATOM   3767  C   CNT A 208     -27.907 -16.610 -15.580  0.00  0.00           C  
ATOM   3768  C   CNT A 208     -27.532 -17.941 -15.250  6.00  0.00           C  
ATOM   3769  C   CNT A 208     -27.611 -18.355 -13.950  7.00  0.00           C  
ATOM   3770  C   CNT A 208     -26.901 -19.516 -13.560  4.00  0.00           C  
ATOM   3771  C   CNT A 208     -26.717 -18.605 -16.210  2.00  0.00           C  
ATOM   3772  C   CNT A 208     -25.891 -19.642 -15.740  1.00  0.00           C  
ATOM   3773  C   CNT A 208     -25.968 -20.103 -14.420  9.00  0.00           C  
ATOM   3774  C   CNT A 208     -25.000 -21.006 -13.980  1.00  0.00           C  
ATOM   3775  C   CNT A 208     -24.805 -20.026 -16.570  9.00  0.00           C  
ATOM   3776  C   CNT A 208     -23.791 -20.852 -16.050  4.00  0.00           C  
ATOM   3777  C   CNT A 208     -23.923 -21.398 -14.770  0.00  0.00           C  
ATOM   3778  C   CNT A 208     -22.786 -21.881 -14.130  5.00  0.00           C  
ATOM   3779  C   CNT A 208     -22.594 -21.015 -16.730  1.00  0.00           C  
ATOM   3780  C   CNT A 208     -21.446 -21.428 -16.090  9.00  0.00           C  
ATOM   3781  C   CNT A 208     -21.578 -21.934 -14.800  7.00  0.00           C  
ATOM   3782  C   CNT A 208     -20.443 -22.194 -14.100  6.00  0.00           C  
ATOM   3783  C   CNT A 208     -20.222 -21.286 -16.740  2.00  0.00           C  
ATOM   3784  C   CNT A 208     -19.044 -21.408 -15.960  3.00  0.00           C  
ATOM   3785  C   CNT A 208     -19.199 -21.909 -14.640  0.00  0.00           C  
ATOM   3786  C   CNT A 208     -18.104 -21.662 -13.740  9.00  0.00           C  
ATOM   3787  C   CNT A 208     -17.795 -20.993 -16.360  9.00  0.00           C  
ATOM   3788  C   CNT A 208     -16.760 -20.647 -15.440  0.00  0.00           C  
ATOM   3789  C   CNT A 208     -16.831 -21.192 -14.140  8.00  0.00           C  
ATOM   3790  C   CNT A 208     -15.838 -20.902 -13.230  9.00  0.00           C  
ATOM   3791  C   CNT A 208     -15.625 -19.926 -15.920  6.00  0.00           C  
ATOM   3792  C   CNT A 208     -14.724 -19.458 -14.920  3.00  0.00           C  
ATOM   3793  C   CNT A 208     -14.874 -19.889 -13.620  5.00  0.00           C  
ATOM   3794  C   CNT A 208     -14.150 -19.283 -12.590  8.00  0.00           C  
ATOM   3795  C   CNT A 208     -13.936 -18.343 -15.280  1.00  0.00           C  
ATOM   3796  C   CNT A 208     -13.305 -17.653 -14.240  9.00  0.00           C  
ATOM   3797  C   CNT A 208     -13.487 -18.074 -12.890  9.00  0.00           C  
ATOM   3798  C   CNT A 208     -13.143 -17.185 -11.840  9.00  0.00           C  
ATOM   3799  C   CNT A 208     -12.852 -16.358 -14.510  5.00  0.00           C  
ATOM   3800  C   CNT A 208     -12.656 -15.435 -13.470  3.00  0.00           C  
ATOM   3801  C   CNT A 208     -12.813 -15.864 -12.160  1.00  0.00           C  
ATOM   3802  C   CNT A 208     -12.796 -14.905 -11.130  4.00  0.00           C  
ATOM   3803  C   CNT A 208     -12.761 -14.075 -13.730  5.00  0.00           C  
ATOM   3804  C   CNT A 208     -12.992 -13.114 -12.680  9.00  0.00           C  
ATOM   3805  C   CNT A 208     -13.045 -13.554 -11.380  9.00  0.00           C  
ATOM   3806  C   CNT A 208     -13.423 -12.620 -10.400  8.00  0.00           C  
ATOM   3807  C   CNT A 208     -13.307 -11.812 -13.020  9.00  0.00           C  
ATOM   3808  C   CNT A 208     -13.958 -11.013 -12.070  0.00  0.00           C  
ATOM   3809  C   CNT A 208     -14.072 -11.427 -10.770  4.00  0.00           C  
ATOM   3810  C   CNT A 208     -14.623 -10.579  -9.850  0.00  0.00           C  
ATOM   3811  C   CNT A 208     -14.540  -9.844 -12.470  2.00  0.00           C  
ATOM   3812  C   CNT A 208     -15.443  -9.173 -11.650  5.00  0.00           C  
ATOM   3813  C   CNT A 208     -15.474  -9.565 -10.280  8.00  0.00           C  
ATOM   3814  C   CNT A 208     -16.511  -9.012  -9.500  1.00  0.00           C  
ATOM   3815  C   CNT A 208     -16.473  -9.313  -8.100  1.00  0.00           C  
ATOM   3816  C   CNT A 208     -17.650  -9.092  -7.360  2.00  0.00           C  
ATOM   3817  C   CNT A 208     -17.757  -9.601  -6.040  8.00  0.00           C  
ATOM   3818  C   CNT A 208     -18.885  -9.337  -5.290  8.00  0.00           C  
ATOM   3819  C   CNT A 208     -18.731  -8.541  -8.030  2.00  0.00           C  
ATOM   3820  C   CNT A 208     -19.908  -8.385  -7.280  7.00  0.00           C  
ATOM   3821  C   CNT A 208     -20.007  -8.725  -5.980  0.00  0.00           C  
ATOM   3822  C   CNT A 208     -21.285  -8.901  -5.380  7.00  0.00           C  
ATOM   3823  C   CNT A 208     -21.129  -8.217  -8.060  6.00  0.00           C  
ATOM   3824  C   CNT A 208     -22.408  -8.472  -7.430  1.00  0.00           C  
ATOM   3825  C   CNT A 208     -22.430  -8.919  -6.120  2.00  0.00           C  
ATOM   3826  C   CNT A 208     -23.630  -9.360  -5.650  8.00  0.00           C  
ATOM   3827  C   CNT A 208     -23.514  -8.499  -8.280  3.00  0.00           C  
ATOM   3828  C   CNT A 208     -24.729  -9.067  -7.800  0.00  0.00           C  
ATOM   3829  C   CNT A 208     -24.695  -9.596  -6.530  7.00  0.00           C  
ATOM   3830  C   CNT A 208     -25.725 -10.492  -6.180  9.00  0.00           C  
ATOM   3831  C   CNT A 208     -25.663  -9.592  -8.780  7.00  0.00           C  
ATOM   3832  C   CNT A 208     -26.586 -10.598  -8.380  4.00  0.00           C  
ATOM   3833  C   CNT A 208     -26.684 -11.012  -7.060  6.00  0.00           C  
ATOM   3834  C   CNT A 208     -27.483 -12.129  -6.760  2.00  0.00           C  
ATOM   3835  C   CNT A 208     -27.252 -11.314  -9.370  0.00  0.00           C  
ATOM   3836  C   CNT A 208     -27.890 -12.527  -9.090  4.00  0.00           C  
ATOM   3837  C   CNT A 208     -28.029 -12.971  -7.740  7.00  0.00           C  
ATOM   3838  C   CNT A 208     -28.487 -14.249  -7.430  7.00  0.00           C  
ATOM   3839  C   CNT A 208     -28.186 -13.422 -10.140  3.00  0.00           C  
ATOM   3840  C   CNT A 208     -28.512 -14.717  -9.820  6.00  0.00           C  
ATOM   3841  C   CNT A 208     -28.706 -15.161  -8.520  2.00  0.00           C  
ATOM   3842  C   CNT A 208     -28.746 -16.552  -8.200  0.00  0.00           C  
ATOM   3843  C   CNT A 208     -28.481 -15.645 -10.840  1.00  0.00           C  
ATOM   3844  C   CNT A 208     -28.522 -17.060 -10.570  0.00  0.00           C  
ATOM   3845  C   CNT A 208     -28.560 -17.480  -9.240  6.00  0.00           C  
ATOM   3846  C   CNT A 208     -28.230 -18.824  -8.870  4.00  0.00           C  
ATOM   3847  C   CNT A 208     -28.143 -17.952 -11.590  9.00  0.00           C  
ATOM   3848  C   CNT A 208     -27.551 -19.147 -11.250  7.00  0.00           C  
ATOM   3849  C   CNT A 208     -27.594 -19.580  -9.910  5.00  0.00           C  
ATOM   3850  C   CNT A 208     -27.062 -20.795  -9.550  5.00  0.00           C  
ATOM   3851  C   CNT A 208     -26.979 -19.915 -12.230  3.00  0.00           C  
ATOM   3852  C   CNT A 208     -26.086 -20.966 -11.750  7.00  0.00           C  
ATOM   3853  C   CNT A 208     -26.227 -21.455 -10.450  3.00  0.00           C  
ATOM   3854  C   CNT A 208     -25.270 -22.375 -10.000  4.00  0.00           C  
ATOM   3855  C   CNT A 208     -25.117 -21.435 -12.640  6.00  0.00           C  
ATOM   3856  C   CNT A 208     -24.104 -22.301 -12.110  1.00  0.00           C  
ATOM   3857  C   CNT A 208     -24.145 -22.679 -10.770  9.00  0.00           C  
ATOM   3858  C   CNT A 208     -23.133 -23.410 -10.210  4.00  0.00           C  
ATOM   3859  C   CNT A 208     -22.885 -22.472 -12.860  3.00  0.00           C  
ATOM   3860  C   CNT A 208     -21.738 -22.966 -12.220  9.00  0.00           C  
ATOM   3861  C   CNT A 208     -21.855 -23.437 -10.860  5.00  0.00           C  
ATOM   3862  C   CNT A 208     -20.712 -23.625 -10.110  6.00  0.00           C  
ATOM   3863  C   CNT A 208     -20.461 -22.750 -12.820  0.00  0.00           C  
ATOM   3864  C   CNT A 208     -19.402 -22.730 -11.980  1.00  0.00           C  
ATOM   3865  C   CNT A 208     -19.512 -23.194 -10.690  7.00  0.00           C  
ATOM   3866  C   CNT A 208     -18.451 -22.994  -9.770  2.00  0.00           C  
ATOM   3867  C   CNT A 208     -18.170 -22.214 -12.400  2.00  0.00           C  
ATOM   3868  C   CNT A 208     -17.091 -22.031 -11.480  5.00  0.00           C  
ATOM   3869  C   CNT A 208     -17.272 -22.400 -10.150  1.00  0.00           C  
ATOM   3870  C   CNT A 208     -16.293 -22.042  -9.230  3.00  0.00           C  
ATOM   3871  C   CNT A 208     -15.972 -21.315 -11.910  0.00  0.00           C  
ATOM   3872  C   CNT A 208     -15.142 -20.713 -10.940  9.00  0.00           C  
ATOM   3873  C   CNT A 208     -15.321 -21.148  -9.620  7.00  0.00           C  
ATOM   3874  C   CNT A 208     -14.566 -20.515  -8.610  4.00  0.00           C  
ATOM   3875  C   CNT A 208     -14.238 -19.735 -11.240  1.00  0.00           C  
ATOM   3876  C   CNT A 208     -13.688 -18.921 -10.190  1.00  0.00           C  
ATOM   3877  C   CNT A 208     -13.838 -19.349  -8.910  0.00  0.00           C  
ATOM   3878  C   CNT A 208     -13.369 -18.543  -7.880  8.00  0.00           C  
ATOM   3879  C   CNT A 208     -13.247 -17.600 -10.520  3.00  0.00           C  
ATOM   3880  C   CNT A 208     -12.942 -16.728  -9.480  1.00  0.00           C  
ATOM   3881  C   CNT A 208     -13.084 -17.165  -8.140  4.00  0.00           C  
ATOM   3882  C   CNT A 208     -13.222 -16.185  -7.130  0.00  0.00           C  
ATOM   3883  C   CNT A 208     -12.886 -15.356  -9.810  0.00  0.00           C  
ATOM   3884  C   CNT A 208     -13.149 -14.397  -8.800  3.00  0.00           C  
ATOM   3885  C   CNT A 208     -13.196 -14.824  -7.470  9.00  0.00           C  
ATOM   3886  C   CNT A 208     -13.545 -13.907  -6.460  3.00  0.00           C  
ATOM   3887  C   CNT A 208     -13.461 -13.067  -9.060  0.00  0.00           C  
ATOM   3888  C   CNT A 208     -14.132 -12.226  -8.150  3.00  0.00           C  
ATOM   3889  C   CNT A 208     -14.215 -12.725  -6.860  0.00  0.00           C  
ATOM   3890  C   CNT A 208     -14.903 -11.956  -5.900  6.00  0.00           C  
ATOM   3891  C   CNT A 208     -14.778 -11.073  -8.530  5.00  0.00           C  
ATOM   3892  C   CNT A 208     -15.489 -10.239  -7.650  4.00  0.00           C  
ATOM   3893  C   CNT A 208     -15.634 -10.842  -6.390  2.00  0.00           C  
ATOM   3894  C   CNT A 208     -16.739 -10.419  -5.530  9.00  0.00           C  
ATOM   3895  C   CNT A 208     -16.804 -10.890  -4.210  0.00  0.00           C  
ATOM   3896  C   CNT A 208     -17.936 -10.501  -3.440  5.00  0.00           C  
ATOM   3897  C   CNT A 208     -18.071 -11.079  -2.160  2.00  0.00           C  
ATOM   3898  C   CNT A 208     -19.224 -10.816  -1.400  3.00  0.00           C  
ATOM   3899  C   CNT A 208     -18.990  -9.821  -4.000  3.00  0.00           C  
ATOM   3900  C   CNT A 208     -20.223  -9.816  -3.350  8.00  0.00           C  
ATOM   3901  C   CNT A 208     -20.314 -10.189  -2.010  2.00  0.00           C  
ATOM   3902  C   CNT A 208     -21.552 -10.280  -1.360  6.00  0.00           C  
ATOM   3903  C   CNT A 208     -21.381  -9.343  -4.030  9.00  0.00           C  
ATOM   3904  C   CNT A 208     -22.673  -9.718  -3.480  6.00  0.00           C  
ATOM   3905  C   CNT A 208     -22.707 -10.291  -2.180  3.00  0.00           C  
ATOM   3906  C   CNT A 208     -23.890 -10.592  -1.630  4.00  0.00           C  
ATOM   3907  C   CNT A 208     -23.806  -9.771  -4.330  8.00  0.00           C  
ATOM   3908  C   CNT A 208     -24.929 -10.496  -3.900  9.00  0.00           C  
ATOM   3909  C   CNT A 208     -25.035 -10.848  -2.540  4.00  0.00           C  
ATOM   3910  C   CNT A 208     -26.007 -11.822  -2.110  8.00  0.00           C  
ATOM   3911  C   CNT A 208     -25.848 -10.941  -4.830  3.00  0.00           C  
ATOM   3912  C   CNT A 208     -26.865 -11.865  -4.460  8.00  0.00           C  
ATOM   3913  C   CNT A 208     -26.937 -12.274  -3.080  2.00  0.00           C  
ATOM   3914  C   CNT A 208     -27.798 -13.368  -2.750  6.00  0.00           C  
ATOM   3915  C   CNT A 208     -27.582 -12.562  -5.470  5.00  0.00           C  
ATOM   3916  C   CNT A 208     -28.176 -13.826  -5.120  8.00  0.00           C  
ATOM   3917  C   CNT A 208     -28.303 -14.220  -3.770  6.00  0.00           C  
ATOM   3918  C   CNT A 208     -28.722 -15.529  -3.510  2.00  0.00           C  
ATOM   3919  C   CNT A 208     -28.518 -14.740  -6.120  6.00  0.00           C  
ATOM   3920  C   CNT A 208     -28.980 -16.038  -5.870  2.00  0.00           C  
ATOM   3921  C   CNT A 208     -29.030 -16.446  -4.560  8.00  0.00           C  
ATOM   3922  C   CNT A 208     -29.108 -17.825  -4.250  8.00  0.00           C  
ATOM   3923  C   CNT A 208     -28.965 -16.963  -6.870  0.00  0.00           C  
ATOM   3924  C   CNT A 208     -28.852 -18.347  -6.610  2.00  0.00           C  
ATOM   3925  C   CNT A 208     -28.784 -18.764  -5.270  3.00  0.00           C  
ATOM   3926  C   CNT A 208     -28.490 -20.103  -5.010  9.00  0.00           C  
ATOM   3927  C   CNT A 208     -28.303 -19.229  -7.550  8.00  0.00           C  
ATOM   3928  C   CNT A 208     -27.830 -20.503  -7.290  3.00  0.00           C  
ATOM   3929  C   CNT A 208     -28.060 -20.992  -6.010  2.00  0.00           C  
ATOM   3930  C   CNT A 208     -27.354 -22.150  -5.550  1.00  0.00           C  
ATOM   3931  C   CNT A 208     -27.135 -21.240  -8.240  3.00  0.00           C  
ATOM   3932  C   CNT A 208     -26.447 -22.413  -7.860  9.00  0.00           C  
ATOM   3933  C   CNT A 208     -26.545 -22.882  -6.540  7.00  0.00           C  
ATOM   3934  C   CNT A 208     -25.624 -23.827  -6.020  4.00  0.00           C  
ATOM   3935  C   CNT A 208     -25.377 -22.914  -8.700  3.00  0.00           C  
ATOM   3936  C   CNT A 208     -24.438 -23.815  -8.150  0.00  0.00           C  
ATOM   3937  C   CNT A 208     -24.506 -24.180  -6.800  2.00  0.00           C  
ATOM   3938  C   CNT A 208     -23.455 -24.945  -6.300  9.00  0.00           C  
ATOM   3939  C   CNT A 208     -23.226 -23.968  -8.850  9.00  0.00           C  
ATOM   3940  C   CNT A 208     -22.039 -24.349  -8.180  8.00  0.00           C  
ATOM   3941  C   CNT A 208     -22.193 -24.926  -6.950  8.00  0.00           C  
ATOM   3942  C   CNT A 208     -20.968 -25.108  -6.180  1.00  0.00           C  
ATOM   3943  C   CNT A 208     -20.842 -24.026  -8.790  4.00  0.00           C  
ATOM   3944  C   CNT A 208     -19.724 -24.058  -7.980  4.00  0.00           C  
ATOM   3945  C   CNT A 208     -19.810 -24.487  -6.650  1.00  0.00           C  
ATOM   3946  C   CNT A 208     -18.689 -24.504  -5.780  8.00  0.00           C  
ATOM   3947  C   CNT A 208     -18.546 -23.443  -8.440  8.00  0.00           C  
ATOM   3948  C   CNT A 208     -17.480 -23.299  -7.550  7.00  0.00           C  
ATOM   3949  C   CNT A 208     -17.514 -23.817  -6.240  4.00  0.00           C  
ATOM   3950  C   CNT A 208     -16.608 -23.369  -5.290  0.00  0.00           C  
ATOM   3951  C   CNT A 208     -16.423 -22.511  -7.920  0.00  0.00           C  
ATOM   3952  C   CNT A 208     -15.601 -21.970  -6.950  1.00  0.00           C  
ATOM   3953  C   CNT A 208     -15.687 -22.355  -5.670  7.00  0.00           C  
ATOM   3954  C   CNT A 208     -14.799 -21.832  -4.710  1.00  0.00           C  
ATOM   3955  C   CNT A 208     -14.677 -20.967  -7.290  2.00  0.00           C  
ATOM   3956  C   CNT A 208     -13.972 -20.280  -6.250  7.00  0.00           C  
ATOM   3957  C   CNT A 208     -14.111 -20.661  -4.960  1.00  0.00           C  
ATOM   3958  C   CNT A 208     -13.589 -19.818  -3.960  2.00  0.00           C  
ATOM   3959  C   CNT A 208     -13.497 -18.931  -6.550  7.00  0.00           C  
ATOM   3960  C   CNT A 208     -13.361 -18.006  -5.510  3.00  0.00           C  
ATOM   3961  C   CNT A 208     -13.439 -18.389  -4.170  5.00  0.00           C  
ATOM   3962  C   CNT A 208     -13.469 -17.494  -3.150  7.00  0.00           C  
ATOM   3963  C   CNT A 208     -13.358 -16.616  -5.790  6.00  0.00           C  
ATOM   3964  C   CNT A 208     -13.350 -15.674  -4.780  2.00  0.00           C  
ATOM   3965  C   CNT A 208     -13.510 -16.130  -3.440  8.00  0.00           C  
ATOM   3966  C   CNT A 208     -13.989 -15.227  -2.480  7.00  0.00           C  
ATOM   3967  C   CNT A 208     -13.548 -14.319  -5.120  1.00  0.00           C  
ATOM   3968  C   CNT A 208     -14.189 -13.514  -4.120  4.00  0.00           C  
ATOM   3969  C   CNT A 208     -14.243 -13.884  -2.780  5.00  0.00           C  
ATOM   3970  C   CNT A 208     -15.154 -13.210  -1.920  0.00  0.00           C  
ATOM   3971  C   CNT A 208     -14.948 -12.390  -4.570  6.00  0.00           C  
ATOM   3972  C   CNT A 208     -15.921 -11.888  -3.730  5.00  0.00           C  
ATOM   3973  C   CNT A 208     -16.037 -12.233  -2.410  2.00  0.00           C  
ATOM   3974  C   CNT A 208     -17.079 -11.810  -1.600  9.00  0.00           C  
ATOM   3975  C   CNT A 208     -17.123 -12.220  -0.270  9.00  0.00           C  
ATOM   3976  C   CNT A 208     -18.227 -11.863   0.500  1.00  0.00           C  
ATOM   3977  C   CNT A 208     -18.226 -12.150   1.890  0.00  0.00           C  
ATOM   3978  C   CNT A 208     -19.364 -11.825   2.640  3.00  0.00           C  
ATOM   3979  C   CNT A 208     -19.312 -11.189  -0.030  1.00  0.00           C  
ATOM   3980  C   CNT A 208     -20.494 -11.012   0.640  8.00  0.00           C  
ATOM   3981  C   CNT A 208     -20.549 -11.354   2.030  7.00  0.00           C  
ATOM   3982  C   CNT A 208     -21.812 -11.387   2.620  4.00  0.00           C  
ATOM   3983  C   CNT A 208     -21.664 -10.544  -0.010  0.00  0.00           C  
ATOM   3984  C   CNT A 208     -22.865 -10.902   0.530  7.00  0.00           C  
ATOM   3985  C   CNT A 208     -22.940 -11.302   1.870  6.00  0.00           C  
ATOM   3986  C   CNT A 208     -24.130 -11.914   2.300  8.00  0.00           C  
ATOM   3987  C   CNT A 208     -23.976 -11.011  -0.300  0.00  0.00           C  
ATOM   3988  C   CNT A 208     -25.138 -11.625   0.160  8.00  0.00           C  
ATOM   3989  C   CNT A 208     -25.180 -12.133   1.470  2.00  0.00           C  
ATOM   3990  C   CNT A 208     -26.292 -12.920   1.860  5.00  0.00           C  
ATOM   3991  C   CNT A 208     -26.129 -12.047  -0.740  8.00  0.00           C  
ATOM   3992  C   CNT A 208     -27.107 -13.008  -0.410  4.00  0.00           C  
ATOM   3993  C   CNT A 208     -27.186 -13.393   0.940  8.00  0.00           C  
ATOM   3994  C   CNT A 208     -27.845 -14.637   1.250  5.00  0.00           C  
ATOM   3995  C   CNT A 208     -27.685 -13.805  -1.400  0.00  0.00           C  
ATOM   3996  C   CNT A 208     -28.291 -15.100  -1.100  8.00  0.00           C  
ATOM   3997  C   CNT A 208     -28.333 -15.491   0.260  6.00  0.00           C  
ATOM   3998  C   CNT A 208     -28.760 -16.775   0.540  1.00  0.00           C  
ATOM   3999  C   CNT A 208     -28.617 -15.964  -2.200  4.00  0.00           C  
ATOM   4000  C   CNT A 208     -28.908 -17.342  -1.860  8.00  0.00           C  
ATOM   4001  C   CNT A 208     -28.876 -17.726  -0.530  9.00  0.00           C  
ATOM   4002  C   CNT A 208     -28.959 -19.077  -0.180  6.00  0.00           C  
ATOM   4003  C   CNT A 208     -29.108 -18.258  -2.900  4.00  0.00           C  
ATOM   4004  C   CNT A 208     -28.965 -19.605  -2.590  3.00  0.00           C  
ATOM   4005  C   CNT A 208     -28.829 -19.971  -1.230  6.00  0.00           C  
ATOM   4006  C   CNT A 208     -28.492 -21.293  -0.960  0.00  0.00           C  
ATOM   4007  C   CNT A 208     -28.506 -20.495  -3.620  5.00  0.00           C  
ATOM   4008  C   CNT A 208     -28.060 -21.769  -3.300  5.00  0.00           C  
ATOM   4009  C   CNT A 208     -28.117 -22.164  -1.950  9.00  0.00           C  
ATOM   4010  C   CNT A 208     -27.451 -23.351  -1.580  4.00  0.00           C  
ATOM   4011  C   CNT A 208     -27.295 -22.510  -4.230  6.00  0.00           C  
ATOM   4012  C   CNT A 208     -26.483 -23.520  -3.750  1.00  0.00           C  
ATOM   4013  C   CNT A 208     -26.594 -24.003  -2.470  8.00  0.00           C  
ATOM   4014  C   CNT A 208     -25.731 -25.059  -2.030  5.00  0.00           C  
ATOM   4015  C   CNT A 208     -25.580 -24.089  -4.680  1.00  0.00           C  
ATOM   4016  C   CNT A 208     -24.625 -24.944  -4.150  7.00  0.00           C  
ATOM   4017  C   CNT A 208     -24.726 -25.509  -2.860  5.00  0.00           C  
ATOM   4018  C   CNT A 208     -23.656 -26.303  -2.310  2.00  0.00           C  
ATOM   4019  C   CNT A 208     -23.457 -25.218  -4.910  2.00  0.00           C  
ATOM   4020  C   CNT A 208     -22.285 -25.726  -4.290  9.00  0.00           C  
ATOM   4021  C   CNT A 208     -22.427 -26.271  -2.990  4.00  0.00           C  
ATOM   4022  C   CNT A 208     -21.261 -26.347  -2.120  5.00  0.00           C  
ATOM   4023  C   CNT A 208     -21.011 -25.569  -4.880  6.00  0.00           C  
ATOM   4024  C   CNT A 208     -19.905 -25.623  -4.020  9.00  0.00           C  
ATOM   4025  C   CNT A 208     -19.980 -26.017  -2.670  0.00  0.00           C  
ATOM   4026  C   CNT A 208     -18.810 -25.958  -1.830  0.00  0.00           C  
ATOM   4027  C   CNT A 208     -18.723 -25.001  -4.490  5.00  0.00           C  
ATOM   4028  C   CNT A 208     -17.684 -24.671  -3.560  4.00  0.00           C  
ATOM   4029  C   CNT A 208     -17.824 -25.044  -2.210  3.00  0.00           C  
ATOM   4030  C   CNT A 208     -16.781 -24.713  -1.340  4.00  0.00           C  
ATOM   4031  C   CNT A 208     -16.667 -23.811  -3.950  2.00  0.00           C  
ATOM   4032  C   CNT A 208     -15.655 -23.388  -3.030  1.00  0.00           C  
ATOM   4033  C   CNT A 208     -15.779 -23.802  -1.700  4.00  0.00           C  
ATOM   4034  C   CNT A 208     -14.936 -23.226  -0.690  5.00  0.00           C  
ATOM   4035  C   CNT A 208     -14.828 -22.258  -3.390  3.00  0.00           C  
ATOM   4036  C   CNT A 208     -14.266 -21.495  -2.340  7.00  0.00           C  
ATOM   4037  C   CNT A 208     -14.405 -21.959  -1.000  1.00  0.00           C  
ATOM   4038  C   CNT A 208     -13.895 -21.124   0.060  1.00  0.00           C  
ATOM   4039  C   CNT A 208     -13.697 -20.232  -2.650  7.00  0.00           C  
ATOM   4040  C   CNT A 208     -13.587 -19.348  -1.580  3.00  0.00           C  
ATOM   4041  C   CNT A 208     -13.779 -19.793  -0.280  3.00  0.00           C  
ATOM   4042  C   CNT A 208     -13.759 -18.817   0.760  2.00  0.00           C  
ATOM   4043  C   CNT A 208     -13.520 -17.968  -1.870  8.00  0.00           C  
ATOM   4044  C   CNT A 208     -13.682 -17.017  -0.880  9.00  0.00           C  
ATOM   4045  C   CNT A 208     -13.945 -17.449   0.420  3.00  0.00           C  
ATOM   4046  C   CNT A 208     -14.219 -16.531   1.470  7.00  0.00           C  
ATOM   4047  C   CNT A 208     -14.073 -15.717  -1.180  0.00  0.00           C  
ATOM   4048  C   CNT A 208     -14.630 -14.848  -0.210  9.00  0.00           C  
ATOM   4049  C   CNT A 208     -14.638 -15.220   1.160  9.00  0.00           C  
ATOM   4050  C   CNT A 208     -15.432 -14.476   2.080  6.00  0.00           C  
ATOM   4051  C   CNT A 208     -15.305 -13.702  -0.650  2.00  0.00           C  
ATOM   4052  C   CNT A 208     -16.181 -13.101   0.230  6.00  0.00           C  
ATOM   4053  C   CNT A 208     -16.217 -13.505   1.580  8.00  0.00           C  
ATOM   4054  C   CNT A 208     -17.153 -12.908   2.400  1.00  0.00           C  
ATOM   4055  C   CNT A 208     -17.230 -13.278   3.740  7.00  0.00           C  
ATOM   4056  C   CNT A 208     -18.298 -12.902   4.560  9.00  0.00           C  
ATOM   4057  C   CNT A 208     -18.404 -13.437   5.880  5.00  0.00           C  
ATOM   4058  C   CNT A 208     -19.618 -13.352   6.520  7.00  0.00           C  
ATOM   4059  C   CNT A 208     -19.442 -12.259   4.010  0.00  0.00           C  
ATOM   4060  C   CNT A 208     -20.656 -12.311   4.620  0.00  0.00           C  
ATOM   4061  C   CNT A 208     -20.742 -12.821   5.920  3.00  0.00           C  
ATOM   4062  C   CNT A 208     -21.990 -12.959   6.500  2.00  0.00           C  
ATOM   4063  C   CNT A 208     -21.842 -11.927   3.930  4.00  0.00           C  
ATOM   4064  C   CNT A 208     -23.079 -12.238   4.470  2.00  0.00           C  
ATOM   4065  C   CNT A 208     -23.168 -12.727   5.760  1.00  0.00           C  
ATOM   4066  C   CNT A 208     -24.428 -13.128   6.330  1.00  0.00           C  
ATOM   4067  C   CNT A 208     -24.176 -12.436   3.630  3.00  0.00           C  
ATOM   4068  C   CNT A 208     -25.317 -13.089   4.080  1.00  0.00           C  
ATOM   4069  C   CNT A 208     -25.499 -13.397   5.430  6.00  0.00           C  
ATOM   4070  C   CNT A 208     -26.676 -13.988   5.890  7.00  0.00           C  
ATOM   4071  C   CNT A 208     -26.391 -13.332   3.190  0.00  0.00           C  
ATOM   4072  C   CNT A 208     -27.267 -14.341   3.590  1.00  0.00           C  
ATOM   4073  C   CNT A 208     -27.450 -14.673   4.920  7.00  0.00           C  
ATOM   4074  C   CNT A 208     -28.206 -15.813   5.230  6.00  0.00           C  
ATOM   4075  C   CNT A 208     -27.892 -15.086   2.580  0.00  0.00           C  
ATOM   4076  C   CNT A 208     -28.407 -16.347   2.880  6.00  0.00           C  
ATOM   4077  C   CNT A 208     -28.581 -16.709   4.210  3.00  0.00           C  
ATOM   4078  C   CNT A 208     -29.116 -18.027   4.500  3.00  0.00           C  
ATOM   4079  C   CNT A 208     -28.866 -17.199   1.870  8.00  0.00           C  
ATOM   4080  C   CNT A 208     -29.236 -18.569   2.110  8.00  0.00           C  
ATOM   4081  C   CNT A 208     -29.315 -18.953   3.460  4.00  0.00           C  
ATOM   4082  C   CNT A 208     -29.306 -20.353   3.740  6.00  0.00           C  
ATOM   4083  C   CNT A 208     -29.016 -19.495   1.090  2.00  0.00           C  
ATOM   4084  C   CNT A 208     -29.023 -20.847   1.390  1.00  0.00           C  
ATOM   4085  C   CNT A 208     -29.113 -21.298   2.710  0.00  0.00           C  
ATOM   4086  C   CNT A 208     -28.704 -22.649   3.020  4.00  0.00           C  
ATOM   4087  C   CNT A 208     -28.549 -21.689   0.390  0.00  0.00           C  
ATOM   4088  C   CNT A 208     -28.130 -22.987   0.720  3.00  0.00           C  
ATOM   4089  C   CNT A 208     -28.297 -23.528   2.050  0.00  0.00           C  
ATOM   4090  C   CNT A 208     -27.650 -24.794   2.370  3.00  0.00           C  
ATOM   4091  C   CNT A 208     -27.500 -23.789  -0.230  6.00  0.00           C  
ATOM   4092  C   CNT A 208     -26.655 -24.839   0.140  3.00  0.00           C  
ATOM   4093  C   CNT A 208     -26.740 -25.272   1.470  1.00  0.00           C  
ATOM   4094  C   CNT A 208     -25.935 -26.373   1.940  3.00  0.00           C  
ATOM   4095  C   CNT A 208     -25.704 -25.447  -0.670  3.00  0.00           C  
ATOM   4096  C   CNT A 208     -24.766 -26.327  -0.160  0.00  0.00           C  
ATOM   4097  C   CNT A 208     -24.897 -26.927   1.110  5.00  0.00           C  
ATOM   4098  C   CNT A 208     -23.831 -27.589   1.730  6.00  0.00           C  
ATOM   4099  C   CNT A 208     -23.690 -26.733  -0.970  2.00  0.00           C  
ATOM   4100  C   CNT A 208     -22.504 -27.189  -0.290  4.00  0.00           C  
ATOM   4101  C   CNT A 208     -22.647 -27.741   1.010  5.00  0.00           C  
ATOM   4102  C   CNT A 208     -21.426 -27.833   1.770  7.00  0.00           C  
ATOM   4103  C   CNT A 208     -21.264 -26.925  -0.880  4.00  0.00           C  
ATOM   4104  C   CNT A 208     -20.135 -26.916  -0.040  3.00  0.00           C  
ATOM   4105  C   CNT A 208     -20.190 -27.305   1.300  8.00  0.00           C  
ATOM   4106  C   CNT A 208     -19.086 -27.147   2.130  6.00  0.00           C  
ATOM   4107  C   CNT A 208     -18.935 -26.356  -0.530  2.00  0.00           C  
ATOM   4108  C   CNT A 208     -17.927 -25.998   0.350  1.00  0.00           C  
ATOM   4109  C   CNT A 208     -18.001 -26.404   1.700  4.00  0.00           C  
ATOM   4110  C   CNT A 208     -17.046 -25.955   2.670  7.00  0.00           C  
ATOM   4111  C   CNT A 208     -16.919 -25.050   0.000  4.00  0.00           C  
ATOM   4112  C   CNT A 208     -16.110 -24.487   1.060  4.00  0.00           C  
ATOM   4113  C   CNT A 208     -16.142 -24.985   2.350  6.00  0.00           C  
ATOM   4114  C   CNT A 208     -15.300 -24.408   3.280  1.00  0.00           C  
ATOM   4115  C   CNT A 208     -15.120 -23.534   0.720  5.00  0.00           C  
ATOM   4116  C   CNT A 208     -14.568 -22.725   1.700  8.00  0.00           C  
ATOM   4117  C   CNT A 208     -14.736 -23.156   3.030  9.00  0.00           C  
ATOM   4118  C   CNT A 208     -14.238 -22.280   4.050  2.00  0.00           C  
ATOM   4119  C   CNT A 208     -14.049 -21.510   1.390  3.00  0.00           C  
ATOM   4120  C   CNT A 208     -13.882 -20.549   2.390  5.00  0.00           C  
ATOM   4121  C   CNT A 208     -13.939 -20.974   3.740  8.00  0.00           C  
ATOM   4122  C   CNT A 208     -13.929 -19.979   4.750  7.00  0.00           C  
ATOM   4123  C   CNT A 208     -13.865 -19.208   2.110  1.00  0.00           C  
ATOM   4124  C   CNT A 208     -14.004 -18.264   3.100  3.00  0.00           C  
ATOM   4125  C   CNT A 208     -13.960 -18.640   4.470  2.00  0.00           C  
ATOM   4126  C   CNT A 208     -14.333 -17.732   5.470  1.00  0.00           C  
ATOM   4127  C   CNT A 208     -14.297 -16.926   2.770  3.00  0.00           C  
ATOM   4128  C   CNT A 208     -14.774 -16.028   3.750  2.00  0.00           C  
ATOM   4129  C   CNT A 208     -14.885 -16.521   5.020  5.00  0.00           C  
ATOM   4130  C   CNT A 208     -15.569 -15.762   6.010  6.00  0.00           C  
ATOM   4131  C   CNT A 208     -15.382 -14.841   3.450  8.00  0.00           C  
ATOM   4132  C   CNT A 208     -16.235 -14.162   4.300  3.00  0.00           C  
ATOM   4133  C   CNT A 208     -16.370 -14.620   5.610  4.00  0.00           C  
ATOM   4134  C   CNT A 208     -17.423 -14.250   6.430  9.00  0.00           C  
ATOM   4135  C   CNT A 208     -17.455 -14.609   7.760  9.00  0.00           C  
ATOM   4136  C   CNT A 208     -18.566 -14.344   8.520  1.00  0.00           C  
ATOM   4137  C   CNT A 208     -18.676 -14.888   9.820  3.00  0.00           C  
ATOM   4138  C   CNT A 208     -19.903 -14.777  10.460  6.00  0.00           C  
ATOM   4139  C   CNT A 208     -19.667 -13.703   7.880  2.00  0.00           C  
ATOM   4140  C   CNT A 208     -20.906 -13.723   8.540  1.00  0.00           C  
ATOM   4141  C   CNT A 208     -20.994 -14.175   9.850  3.00  0.00           C  
ATOM   4142  C   CNT A 208     -22.236 -14.389  10.450  8.00  0.00           C  
ATOM   4143  C   CNT A 208     -22.072 -13.317   7.850  2.00  0.00           C  
ATOM   4144  C   CNT A 208     -23.345 -13.547   8.420  1.00  0.00           C  
ATOM   4145  C   CNT A 208     -23.420 -14.080   9.740  5.00  0.00           C  
ATOM   4146  C   CNT A 208     -24.677 -14.364  10.260  3.00  0.00           C  
ATOM   4147  C   CNT A 208     -24.507 -13.609   7.600  6.00  0.00           C  
ATOM   4148  C   CNT A 208     -25.677 -14.185   8.050  7.00  0.00           C  
ATOM   4149  C   CNT A 208     -25.731 -14.583   9.370  5.00  0.00           C  
ATOM   4150  C   CNT A 208     -26.841 -15.315   9.760  4.00  0.00           C  
ATOM   4151  C   CNT A 208     -26.686 -14.548   7.170  1.00  0.00           C  
ATOM   4152  C   CNT A 208     -27.635 -15.510   7.520  7.00  0.00           C  
ATOM   4153  C   CNT A 208     -27.627 -15.960   8.830  7.00  0.00           C  
ATOM   4154  C   CNT A 208     -28.261 -17.154   9.150  8.00  0.00           C  
ATOM   4155  C   CNT A 208     -28.322 -16.296   6.570  1.00  0.00           C  
ATOM   4156  C   CNT A 208     -28.837 -17.530   6.860  4.00  0.00           C  
ATOM   4157  C   CNT A 208     -28.758 -18.027   8.170  4.00  0.00           C  
ATOM   4158  C   CNT A 208     -28.991 -19.343   8.490  1.00  0.00           C  
ATOM   4159  C   CNT A 208     -29.106 -18.460   5.850  3.00  0.00           C  
ATOM   4160  C   CNT A 208     -29.187 -19.792   6.160  1.00  0.00           C  
ATOM   4161  C   CNT A 208     -29.247 -20.271   7.460  0.00  0.00           C  
ATOM   4162  C   CNT A 208     -29.291 -21.664   7.750  0.00  0.00           C  
ATOM   4163  C   CNT A 208     -29.304 -20.819   5.070  7.00  0.00           C  
ATOM   4164  C   CNT A 208     -29.025 -22.156   5.390  9.00  0.00           C  
ATOM   4165  C   CNT A 208     -29.105 -22.556   6.680  0.00  0.00           C  
ATOM   4166  C   CNT A 208     -28.847 -23.867   7.030  8.00  0.00           C  
ATOM   4167  C   CNT A 208     -28.778 -23.080   4.340  2.00  0.00           C  
ATOM   4168  C   CNT A 208     -28.426 -24.378   4.730  3.00  0.00           C  
ATOM   4169  C   CNT A 208     -28.379 -24.775   6.040  0.00  0.00           C  
ATOM   4170  C   CNT A 208     -27.944 -26.039   6.360  5.00  0.00           C  
ATOM   4171  C   CNT A 208     -27.718 -25.198   3.740  0.00  0.00           C  
ATOM   4172  C   CNT A 208     -27.075 -26.413   4.080  2.00  0.00           C  
ATOM   4173  C   CNT A 208     -27.190 -26.781   5.420  7.00  0.00           C  
ATOM   4174  C   CNT A 208     -26.225 -27.680   5.930  2.00  0.00           C  
ATOM   4175  C   CNT A 208     -26.069 -26.926   3.210  4.00  0.00           C  
ATOM   4176  C   CNT A 208     -25.086 -27.775   3.730  7.00  0.00           C  
ATOM   4177  C   CNT A 208     -25.211 -28.160   5.100  7.00  0.00           C  
ATOM   4178  C   CNT A 208     -24.074 -28.816   5.710  5.00  0.00           C  
ATOM   4179  C   CNT A 208     -23.891 -28.021   3.050  0.00  0.00           C  
ATOM   4180  C   CNT A 208     -22.677 -28.517   3.730  1.00  0.00           C  
ATOM   4181  C   CNT A 208     -22.803 -28.925   5.060  1.00  0.00           C  
ATOM   4182  C   CNT A 208     -21.617 -29.058   5.770  4.00  0.00           C  
ATOM   4183  C   CNT A 208     -21.476 -28.361   3.060  3.00  0.00           C  
ATOM   4184  C   CNT A 208     -20.282 -28.289   3.860  7.00  0.00           C  
ATOM   4185  C   CNT A 208     -20.374 -28.727   5.230  1.00  0.00           C  
ATOM   4186  C   CNT A 208     -19.285 -28.477   6.110  1.00  0.00           C  
ATOM   4187  C   CNT A 208     -19.173 -27.542   3.470  2.00  0.00           C  
ATOM   4188  C   CNT A 208     -18.151 -27.267   4.400  5.00  0.00           C  
ATOM   4189  C   CNT A 208     -18.223 -27.677   5.750  3.00  0.00           C  
ATOM   4190  C   CNT A 208     -17.230 -27.352   6.660  0.00  0.00           C  
ATOM   4191  C   CNT A 208     -17.128 -26.388   4.010  2.00  0.00           C  
ATOM   4192  C   CNT A 208     -16.141 -25.973   4.930  4.00  0.00           C  
ATOM   4193  C   CNT A 208     -16.327 -26.321   6.310  4.00  0.00           C  
ATOM   4194  C   CNT A 208     -15.566 -25.635   7.270  5.00  0.00           C  
ATOM   4195  C   CNT A 208     -15.391 -24.802   4.610  5.00  0.00           C  
ATOM   4196  C   CNT A 208     -14.857 -23.945   5.640  7.00  0.00           C  
ATOM   4197  C   CNT A 208     -15.033 -24.382   6.970  8.00  0.00           C  
ATOM   4198  C   CNT A 208     -14.569 -23.601   8.030  7.00  0.00           C  
ATOM   4199  C   CNT A 208     -14.363 -22.689   5.370  3.00  0.00           C  
ATOM   4200  C   CNT A 208     -14.078 -21.766   6.390  4.00  0.00           C  
ATOM   4201  C   CNT A 208     -14.318 -22.199   7.690  0.00  0.00           C  
ATOM   4202  C   CNT A 208     -14.343 -21.232   8.720  7.00  0.00           C  
ATOM   4203  C   CNT A 208     -14.032 -20.383   6.060  5.00  0.00           C  
ATOM   4204  C   CNT A 208     -14.133 -19.463   7.130  1.00  0.00           C  
ATOM   4205  C   CNT A 208     -14.295 -19.821   8.430  0.00  0.00           C  
ATOM   4206  C   CNT A 208     -14.490 -18.937   9.440  0.00  0.00           C  
ATOM   4207  C   CNT A 208     -14.310 -18.080   6.860  0.00  0.00           C  
ATOM   4208  C   CNT A 208     -14.931 -17.329   7.760  2.00  0.00           C  
ATOM   4209  C   CNT A 208     -15.074 -17.718   9.110  6.00  0.00           C  
ATOM   4210  C   CNT A 208     -15.758 -16.916  10.060  1.00  0.00           C  
ATOM   4211  C   CNT A 208     -15.540 -16.128   7.390  0.00  0.00           C  
ATOM   4212  C   CNT A 208     -16.450 -15.451   8.240  6.00  0.00           C  
ATOM   4213  C   CNT A 208     -16.580 -15.891   9.590  2.00  0.00           C  
ATOM   4214  C   CNT A 208     -17.607 -15.519  10.420  4.00  0.00           C  
ATOM   4215  C   CNT A 208     -17.674 -15.833  11.750  3.00  0.00           C  
ATOM   4216  C   CNT A 208     -18.835 -15.663  12.470  3.00  0.00           C  
ATOM   4217  C   CNT A 208     -18.874 -16.006  13.850  7.00  0.00           C  
ATOM   4218  C   CNT A 208     -20.124 -15.935  14.430  7.00  0.00           C  
ATOM   4219  C   CNT A 208     -20.002 -15.250  11.770  6.00  0.00           C  
ATOM   4220  C   CNT A 208     -21.234 -15.285  12.450  7.00  0.00           C  
ATOM   4221  C   CNT A 208     -21.360 -15.708  13.780  7.00  0.00           C  
ATOM   4222  C   CNT A 208     -22.641 -15.761  14.310  6.00  0.00           C  
ATOM   4223  C   CNT A 208     -22.404 -14.934  11.710  1.00  0.00           C  
ATOM   4224  C   CNT A 208     -23.682 -14.961  12.330  4.00  0.00           C  
ATOM   4225  C   CNT A 208     -23.803 -15.443  13.650  7.00  0.00           C  
ATOM   4226  C   CNT A 208     -25.072 -15.549  14.220  6.00  0.00           C  
ATOM   4227  C   CNT A 208     -24.813 -14.809  11.570  9.00  0.00           C  
ATOM   4228  C   CNT A 208     -26.002 -15.225  12.050  6.00  0.00           C  
ATOM   4229  C   CNT A 208     -26.269 -15.433  13.420  6.00  0.00           C  
ATOM   4230  C   CNT A 208     -27.545 -15.969  13.720  6.00  0.00           C  
ATOM   4231  C   CNT A 208     -26.975 -15.668  11.100  8.00  0.00           C  
ATOM   4232  C   CNT A 208     -27.936 -16.616  11.490  8.00  0.00           C  
ATOM   4233  C   CNT A 208     -28.266 -16.879  12.860  8.00  0.00           C  
ATOM   4234  C   CNT A 208     -28.873 -18.066  13.110  0.00  0.00           C  
ATOM   4235  C   CNT A 208     -28.401 -17.484  10.520  6.00  0.00           C  
ATOM   4236  C   CNT A 208     -28.860 -18.846  10.810  2.00  0.00           C  
ATOM   4237  C   CNT A 208     -29.134 -19.079  12.180  4.00  0.00           C  
ATOM   4238  C   CNT A 208     -29.645 -20.387  12.350  9.00  0.00           C  
ATOM   4239  C   CNT A 208     -29.128 -19.821   9.820  9.00  0.00           C  
ATOM   4240  C   CNT A 208     -29.470 -21.124  10.090  4.00  0.00           C  
ATOM   4241  C   CNT A 208     -29.659 -21.506  11.460  3.00  0.00           C  
ATOM   4242  C   CNT A 208     -29.945 -22.899  11.670  6.00  0.00           C  
ATOM   4243  C   CNT A 208     -29.411 -22.075   9.070  2.00  0.00           C  
ATOM   4244  C   CNT A 208     -29.308 -23.422   9.410  5.00  0.00           C  
ATOM   4245  C   CNT A 208     -29.555 -23.863  10.740  8.00  0.00           C  
ATOM   4246  C   CNT A 208     -29.264 -25.240  10.960  0.00  0.00           C  
ATOM   4247  C   CNT A 208     -28.960 -24.319   8.380  5.00  0.00           C  
ATOM   4248  C   CNT A 208     -28.664 -25.656   8.710  5.00  0.00           C  
ATOM   4249  C   CNT A 208     -28.795 -26.164  10.010  1.00  0.00           C  
ATOM   4250  C   CNT A 208     -28.417 -27.470  10.210  1.00  0.00           C  
ATOM   4251  C   CNT A 208     -28.062 -26.518   7.720  2.00  0.00           C  
ATOM   4252  C   CNT A 208     -27.257 -27.588   8.130  2.00  0.00           C  
ATOM   4253  C   CNT A 208     -27.425 -28.150   9.410  7.00  0.00           C  
ATOM   4254  C   CNT A 208     -26.545 -29.193   9.730  9.00  0.00           C  
ATOM   4255  C   CNT A 208     -26.265 -28.151   7.290  7.00  0.00           C  
ATOM   4256  C   CNT A 208     -25.211 -28.870   7.870  4.00  0.00           C  
ATOM   4257  C   CNT A 208     -25.334 -29.438   9.140  2.00  0.00           C  
ATOM   4258  C   CNT A 208     -24.164 -29.978   9.640  7.00  0.00           C  
ATOM   4259  C   CNT A 208     -24.098 -29.146   7.110  6.00  0.00           C  
ATOM   4260  C   CNT A 208     -22.927 -29.709   7.660  5.00  0.00           C  
ATOM   4261  C   CNT A 208     -22.979 -30.260   8.970  2.00  0.00           C  
ATOM   4262  C   CNT A 208     -21.779 -30.848   9.370  5.00  0.00           C  
ATOM   4263  C   CNT A 208     -21.699 -29.555   7.080  8.00  0.00           C  
ATOM   4264  C   CNT A 208     -20.532 -29.670   7.810  6.00  0.00           C  
ATOM   4265  C   CNT A 208     -20.534 -30.297   9.110  4.00  0.00           C  
ATOM   4266  C   CNT A 208     -19.429 -30.065   9.880  6.00  0.00           C  
ATOM   4267  C   CNT A 208     -19.344 -29.112   7.390  6.00  0.00           C  
ATOM   4268  C   CNT A 208     -18.313 -28.745   8.300  3.00  0.00           C  
ATOM   4269  C   CNT A 208     -18.295 -29.295   9.610  7.00  0.00           C  
ATOM   4270  C   CNT A 208     -17.215 -28.918  10.420  7.00  0.00           C  
ATOM   4271  C   CNT A 208     -17.275 -27.827   7.960  8.00  0.00           C  
ATOM   4272  C   CNT A 208     -16.368 -27.324   8.880  6.00  0.00           C  
ATOM   4273  C   CNT A 208     -16.425 -27.750  10.230  8.00  0.00           C  
ATOM   4274  C   CNT A 208     -15.626 -27.049  11.120  8.00  0.00           C  
ATOM   4275  C   CNT A 208     -15.668 -26.128   8.610  6.00  0.00           C  
ATOM   4276  C   CNT A 208     -15.176 -25.274   9.640  7.00  0.00           C  
ATOM   4277  C   CNT A 208     -15.262 -25.716  10.960  4.00  0.00           C  
ATOM   4278  C   CNT A 208     -14.843 -24.793  11.960  0.00  0.00           C  
ATOM   4279  C   CNT A 208     -14.733 -23.989   9.360  2.00  0.00           C  
ATOM   4280  C   CNT A 208     -14.559 -23.009  10.380  4.00  0.00           C  
ATOM   4281  C   CNT A 208     -14.444 -23.451  11.720  7.00  0.00           C  
ATOM   4282  C   CNT A 208     -14.052 -22.460  12.640  5.00  0.00           C  
ATOM   4283  C   CNT A 208     -14.368 -21.672  10.080  8.00  0.00           C  
ATOM   4284  C   CNT A 208     -14.266 -20.692  11.080  3.00  0.00           C  
ATOM   4285  C   CNT A 208     -14.147 -21.041  12.470  4.00  0.00           C  
ATOM   4286  C   CNT A 208     -14.403 -19.989  13.410  5.00  0.00           C  
ATOM   4287  C   CNT A 208     -14.453 -19.314  10.800  4.00  0.00           C  
ATOM   4288  C   CNT A 208     -14.905 -18.409  11.820  7.00  0.00           C  
ATOM   4289  C   CNT A 208     -14.933 -18.723  13.160  6.00  0.00           C  
ATOM   4290  C   CNT A 208     -15.566 -17.836  14.010  4.00  0.00           C  
ATOM   4291  C   CNT A 208     -15.684 -17.310  11.390  6.00  0.00           C  
ATOM   4292  C   CNT A 208     -16.632 -16.671  12.220  4.00  0.00           C  
ATOM   4293  C   CNT A 208     -16.562 -16.920  13.620  6.00  0.00           C  
ATOM   4294  C   CNT A 208     -17.675 -16.559  14.410  4.00  0.00           C  
END
